# Supplementary material
Source: MDPI journal article supplement (https://www.mdpi.com/2076-3263/12/11/392)
Supplement: s1 [file s1]

Supplementary File S2: SEM-BSE  
images and Energy Dispersive  
Spectroscopy (EDS) mineral analyses  
for heavy mineral separates.

B1: SEM-BSE images and EDS  
mineral analyses for sample S2.



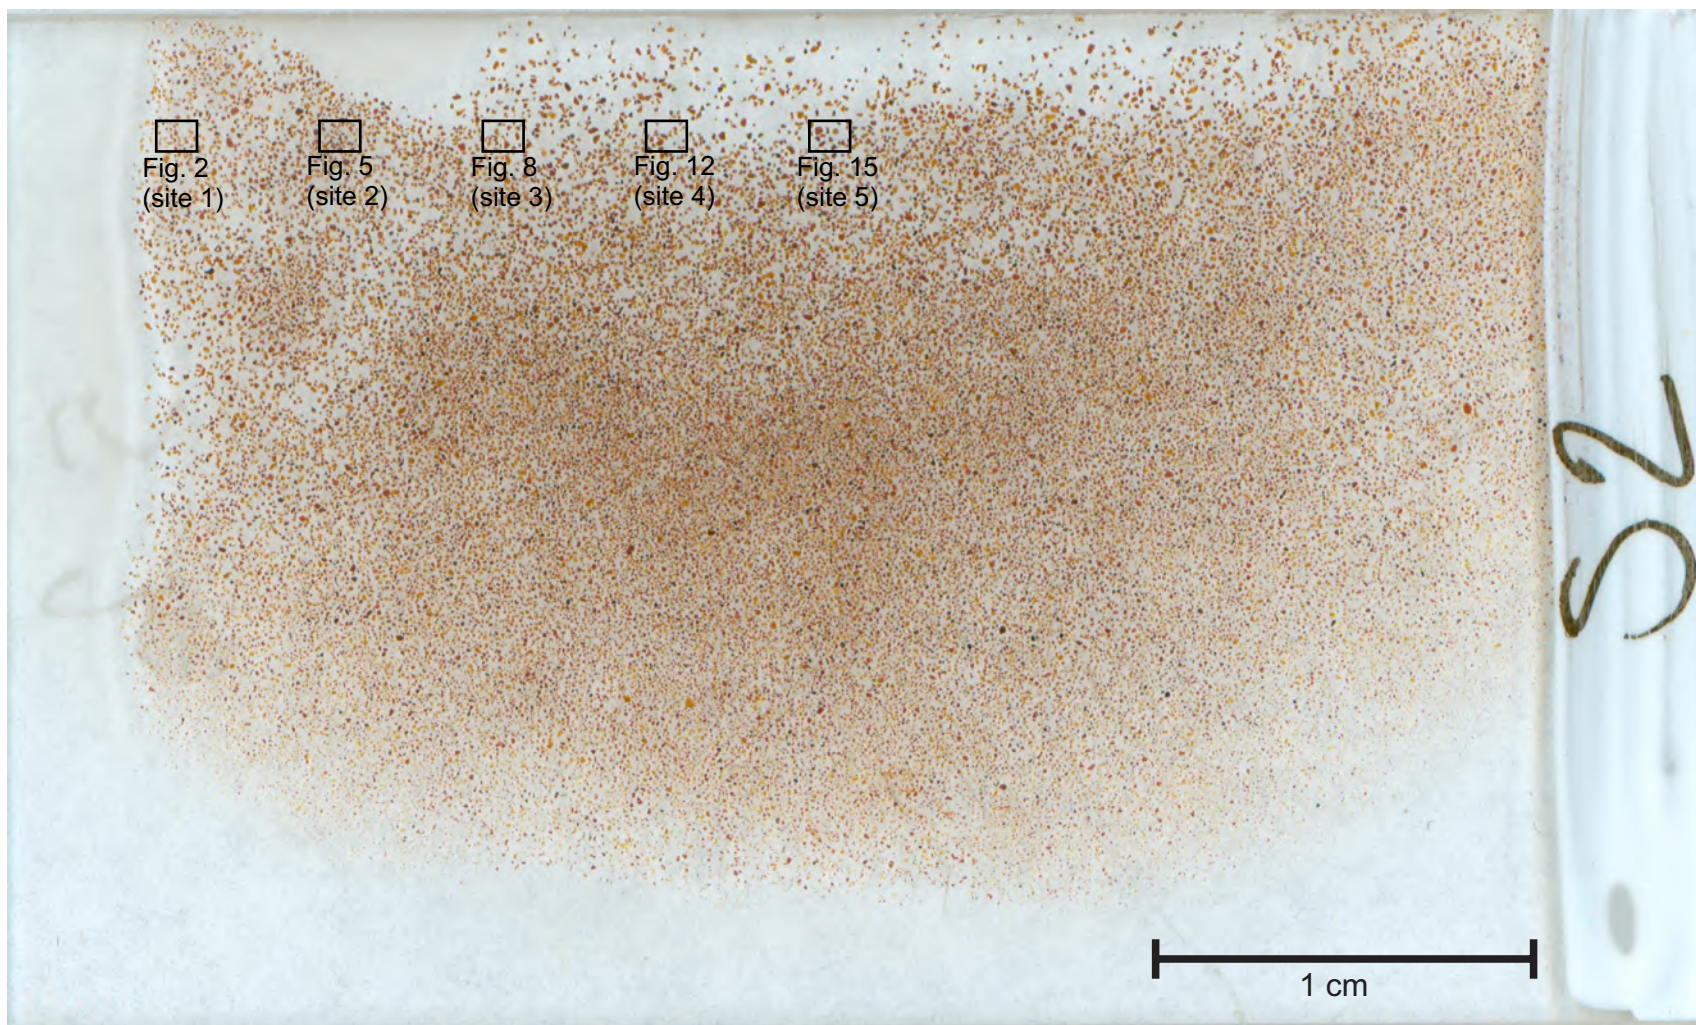

Figure B1.1: Scanned thin section of sample S2 showing the location of analysed sites. This site consists of mostly sandy conglomerate, with this sample coming from a sandy matrix of matrix-supported conglomerate ~1m below present surface.

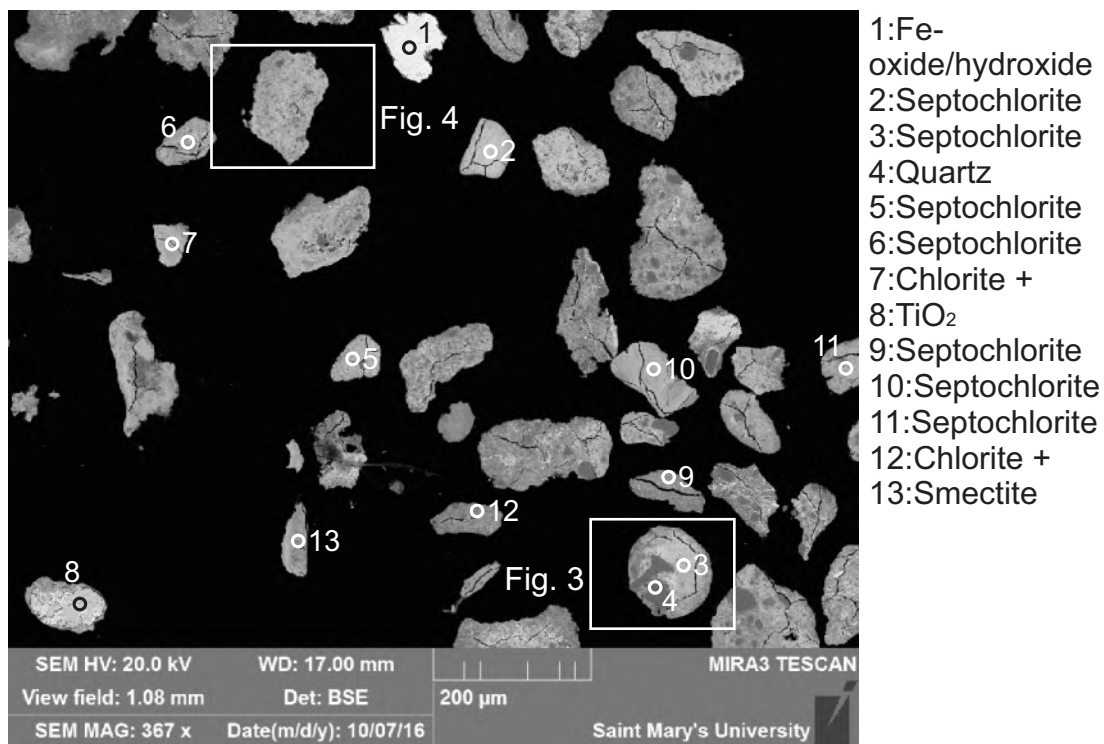

Figure B1.2: Sample S2 site 1 (SEM).

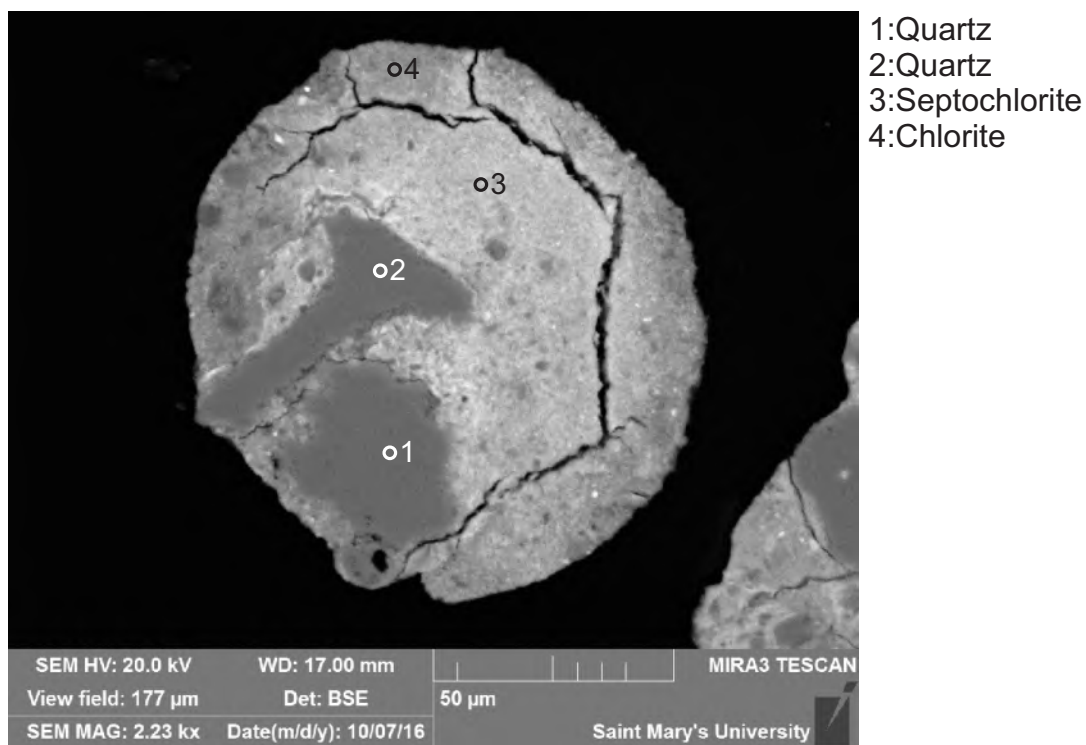

Figure B1.3: Sample S2 site 2 (SEM).



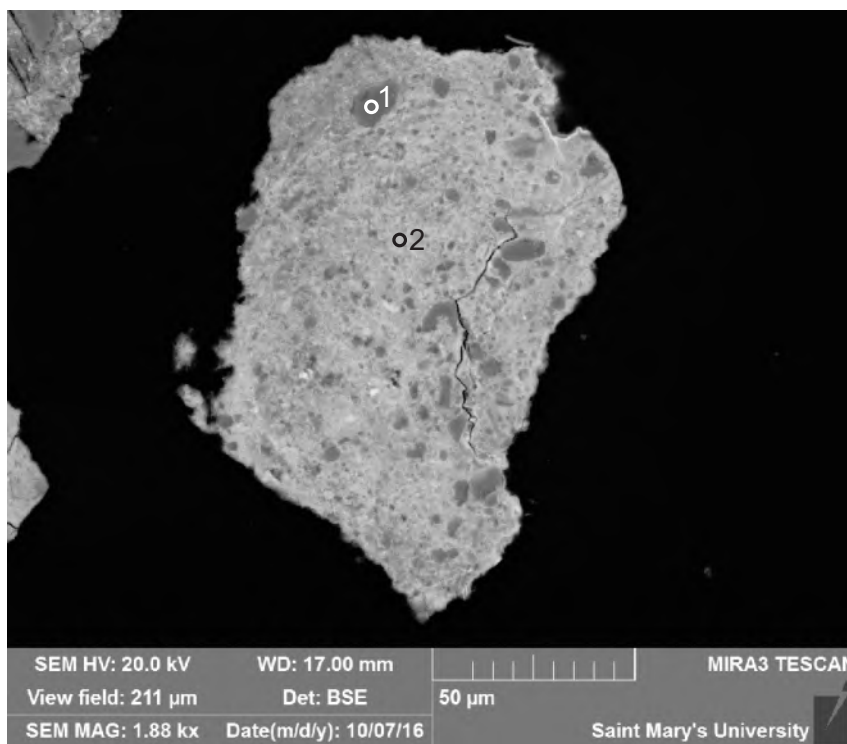

- 1:Quartz
- 2:Chlorite +

Figure B1.4: Sample S2 site 3 (SEM). Mudstone lithic clast consisting of fine-grained quartz and chlorite.

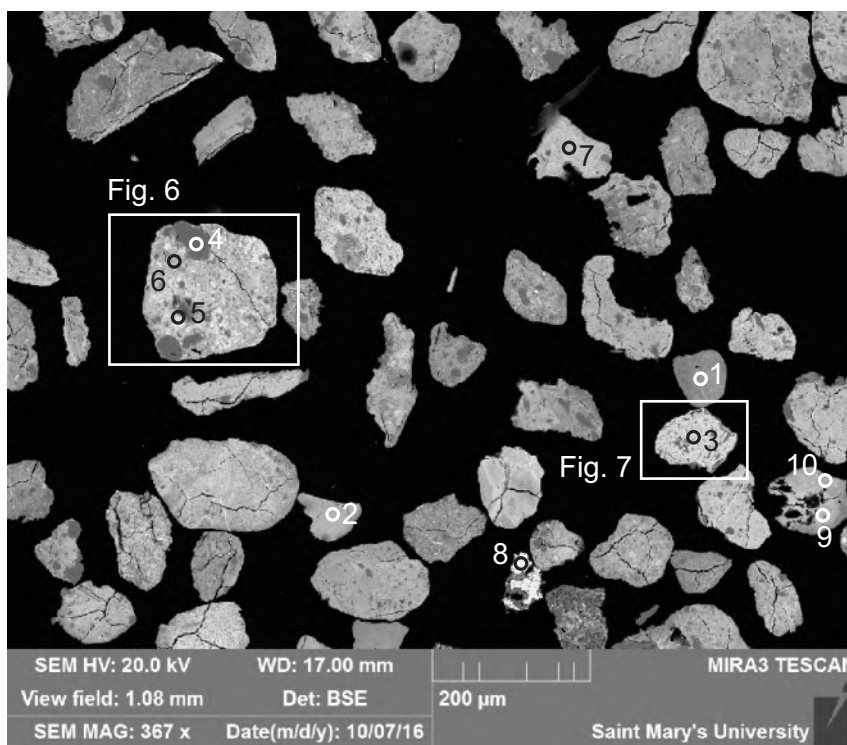

- 1:Septochlorite
- 2:Septochlorite
- 3:Septochlorite
- 4:Quartz
- 5:Septochlorite
- 6:Septochlorite
- 7:Septochlorite
- 8:Fe-oxide/hydroxide +
- 9:Septochlorite +
- 10:Septochlorite

Figure B1.5: Sample S2 site 4 (SEM).

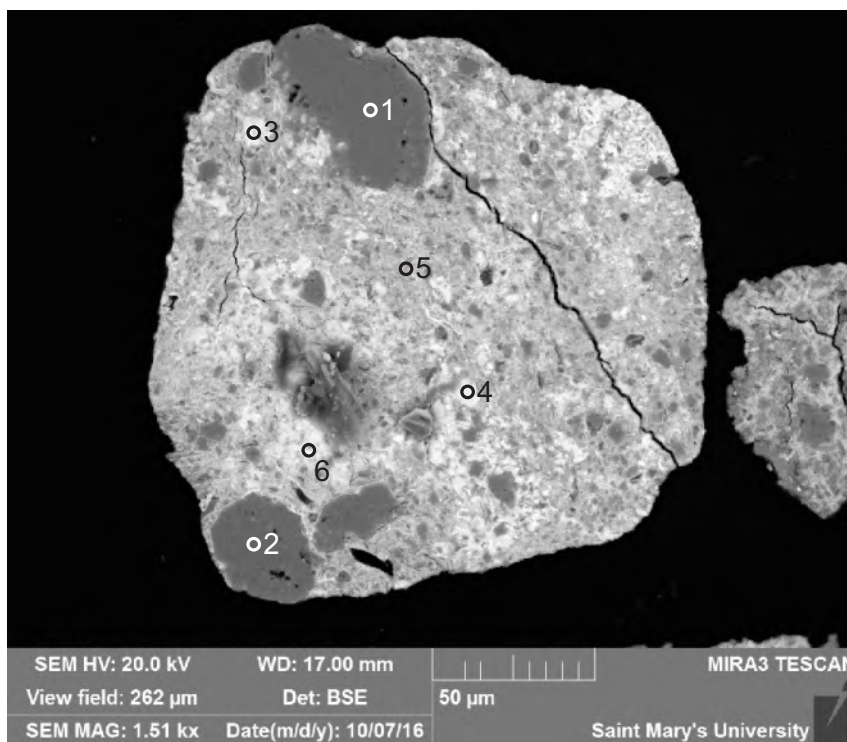

- 1:Quartz
- 2:Quartz
- 3:Fe-oxide/hydroxide +
- 4:Fe-oxide/hydroxide +
- 5:Septochlorite
- 6:Fe-oxide/hydroxide +

Figure B1.6: Sample S2 site 5 (SEM). Siltstone lithic clast consisting of quartz, septochlorite, and Fe-oxides/hydroxides.

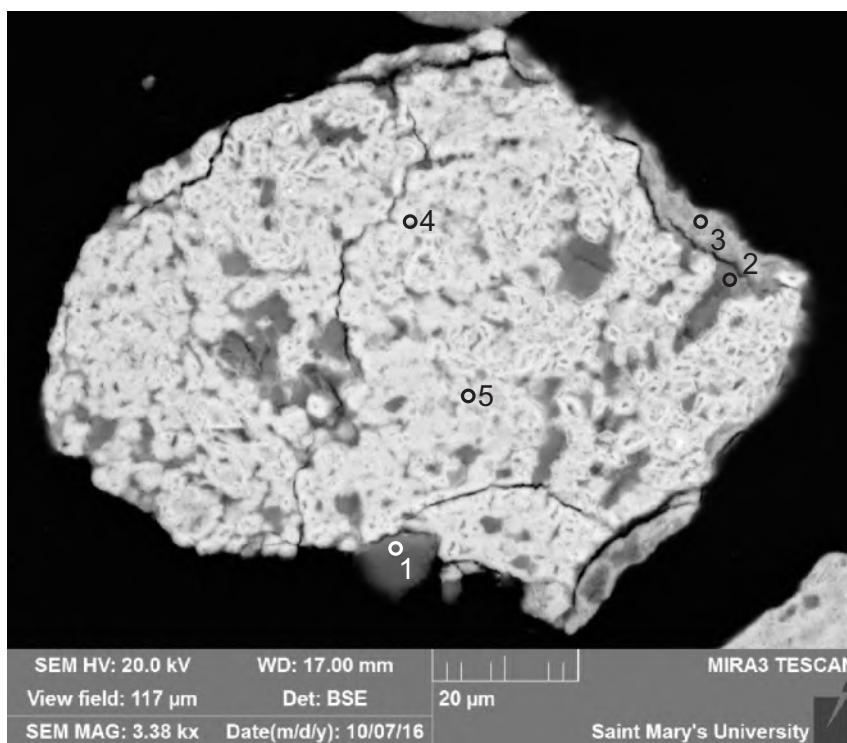

- 1:Kaolinite
- 2:Mix
- 3:Chlorite
- 4:Fe-oxide/hydroxide +
- 5:Fe-oxide/hydroxide +

Figure B1.7: Sample S2 site 6 (SEM). Fine-grained lithic clast consisting of kaolinite, chlorite, and Fe-oxides/hydroxides ?pedogenic.

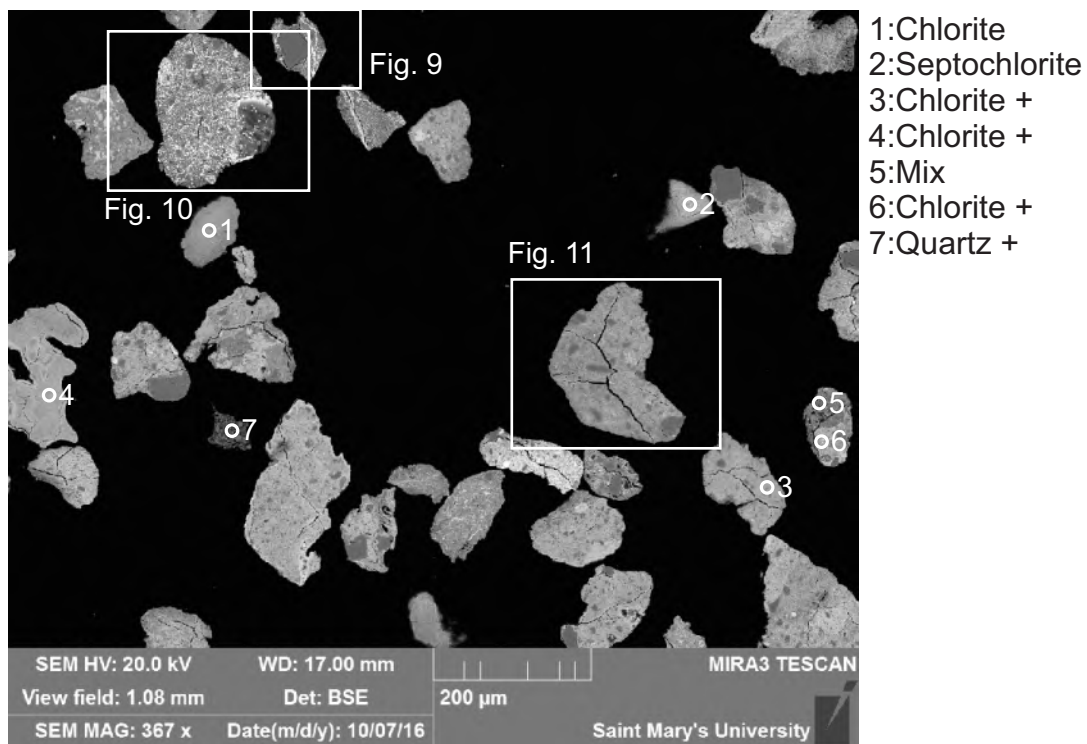

Figure B1.8: Sample S2 site 7 (SEM).

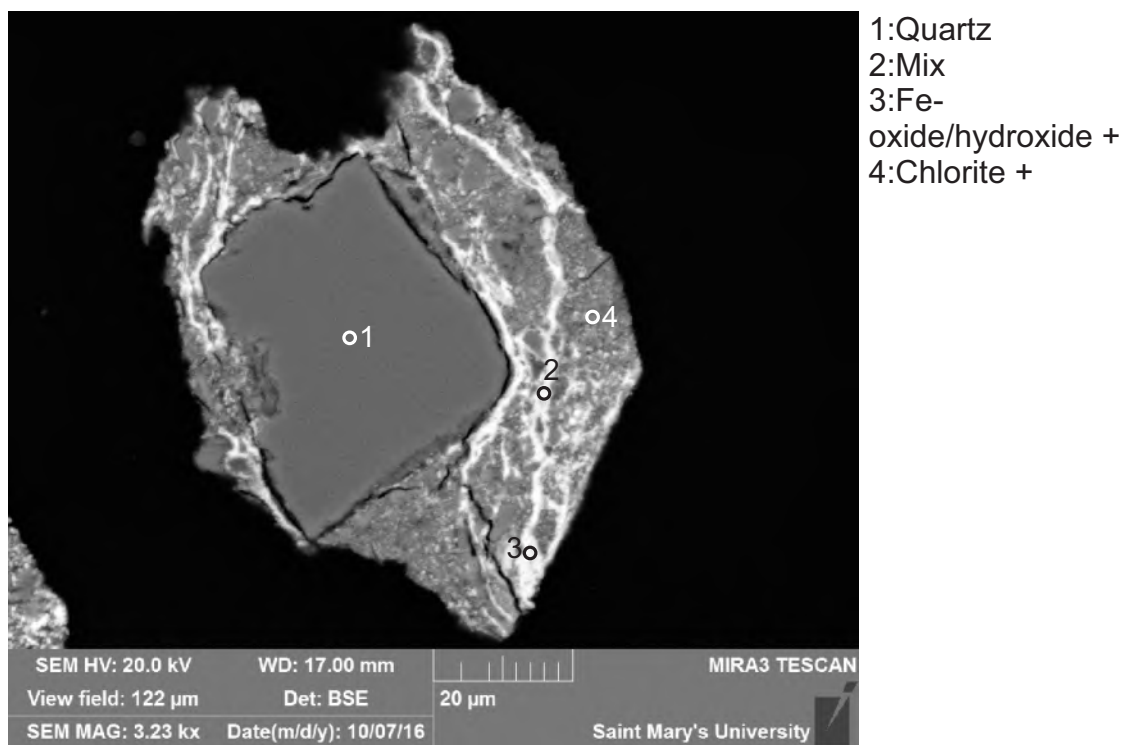

Figure B1.9: Sample S2 site 8 (SEM). Quartz + chlorite with pedogenoc crust.

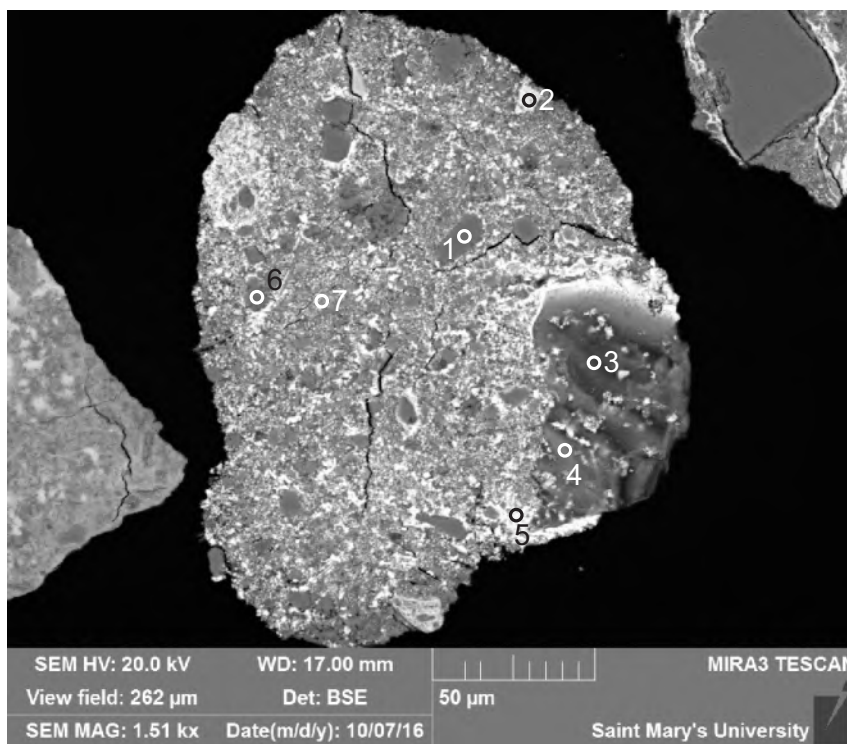

- 1:Quartz
- 2:Fe-oxide/hydroxide +
- 3:Muscovite
- 4:Muscovite
- 5:Fe-oxide/hydroxide +
- 6:Quartz
- 7:Chlorite +

Figure B1.10: Sample S2 site 9 (SEM). Siltstone lithic clast or rhyolite consisting of quartz, chlorite, muscovite, and Fe-oxides/hydroxides.

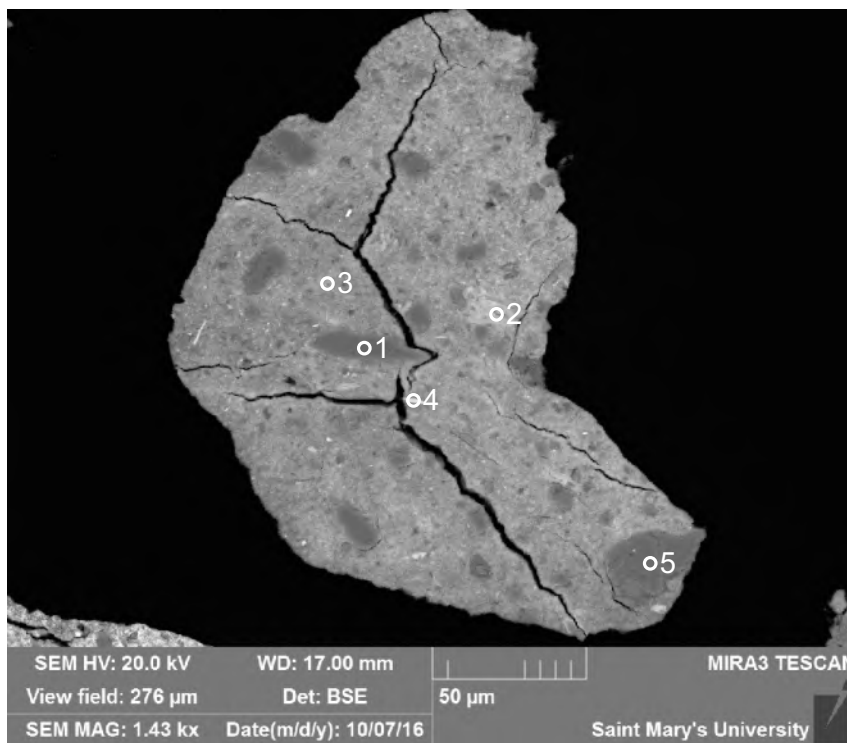

- 1:Quartz
- 2:Chlorite
- 3:Chlorite +
- 4:TiO<sub>2</sub> +
- 5:Quartz

Figure B1.11: Sample S2 site 10 (SEM). Siltstone lithic clast consisting of quartz, chlorite, and ?late titania minerals.



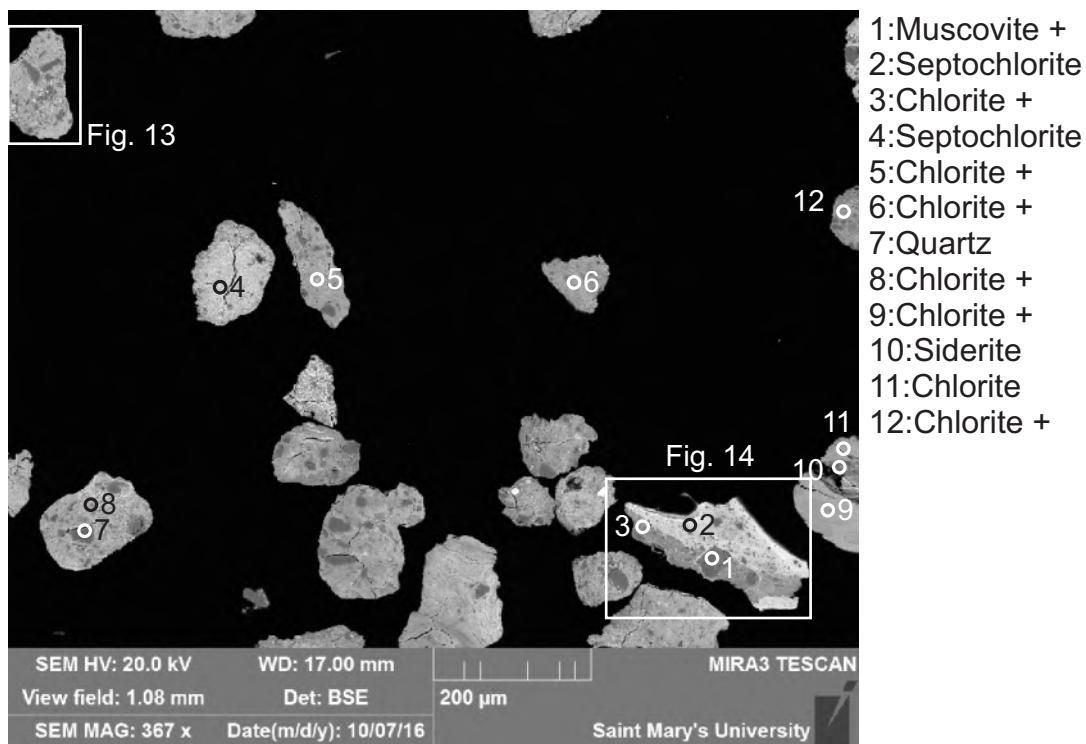

Figure B1.12: Sample S2 site 11 (SEM). Siltstone lithic clast consisting of quartz and chlorite.

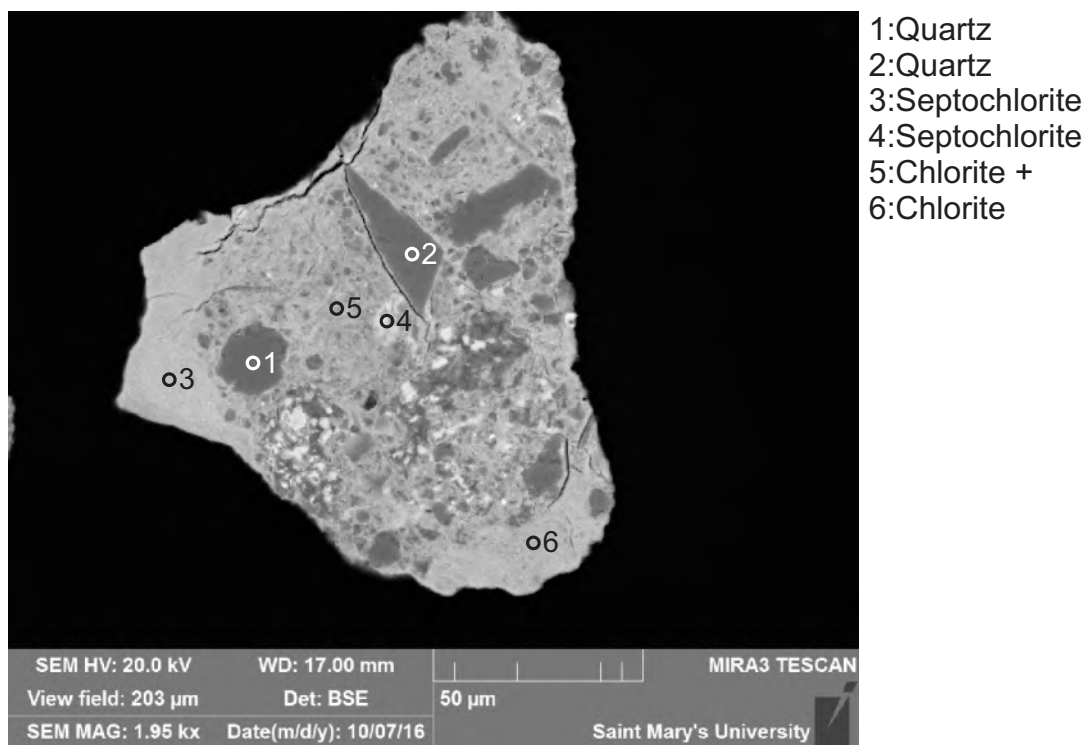

Figure B1.13: Sample S2 site 12 (SEM). Siltstone lithic clast containing subrounded-angular quartz, chlorite, and possible Fe-oxides/hydroxides.

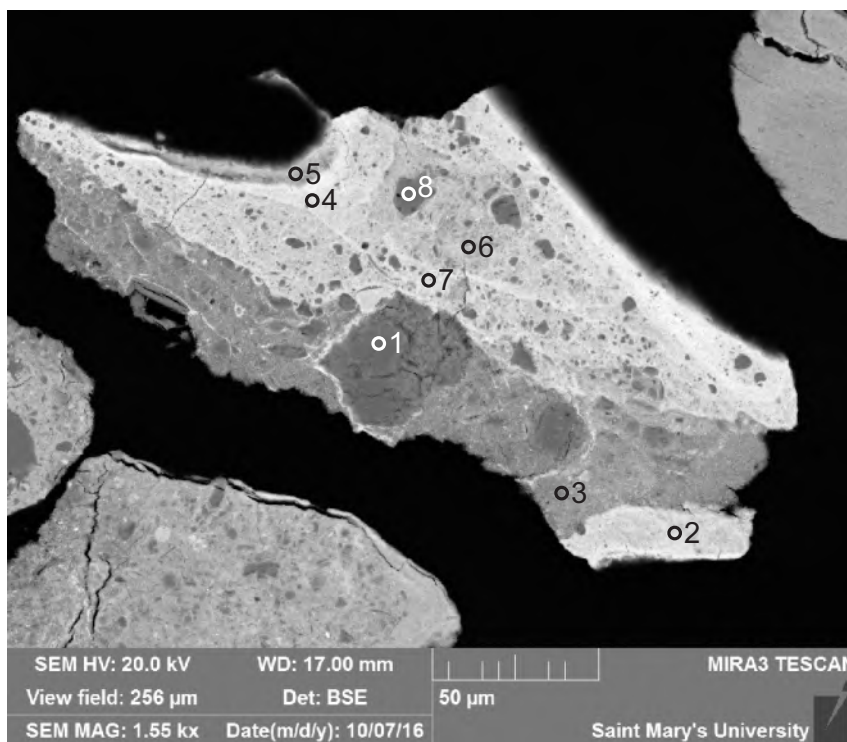

- 1:Quartz
- 2:Fe-oxide/hydroxide +
- 3:Chlorite +
- 4:Septochlorite
- 5:Septochlorite
- 6:Septochlorite
- 7:Septochlorite
- 8:Quartz

Figure B1.14: Sample S2 site 13 (SEM). Siltstone lithic clast consisting of quartz, septochlorite, and Fe-oxides/hydroxides.

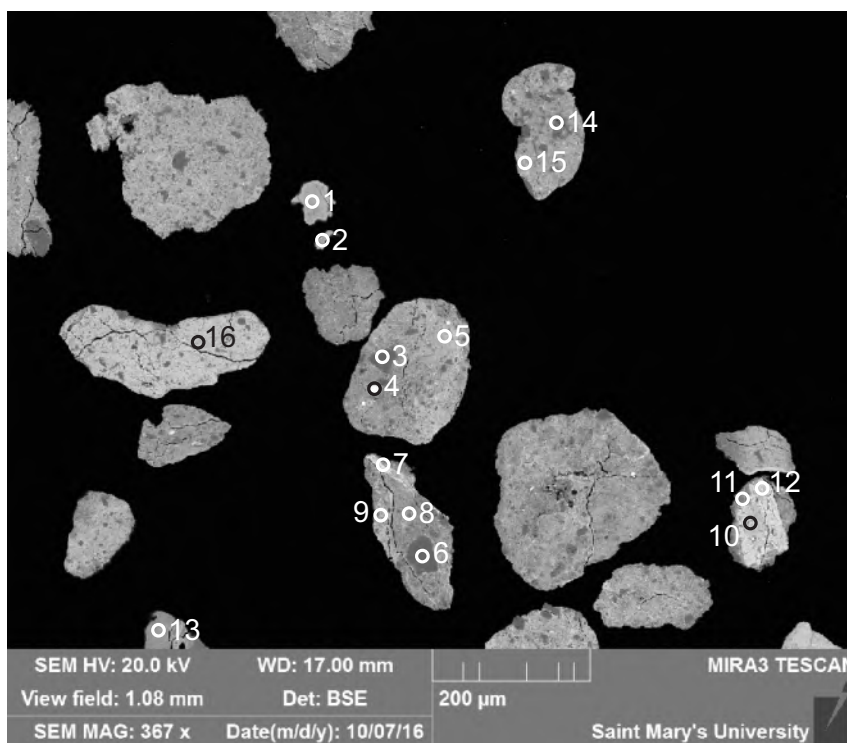

- 1:Chlorite
- 2:Chlorite
- 3:Quartz
- 4:Fe-oxide/hydroxide +
- 5:Chlorite +
- 6:Quartz +
- 7:Fe-oxide/hydroxide +
- 8:Chlorite +
- 9:Chlorite +
- 10:Mix
- 11:Mix
- 12:Mix
- 13:Chlorite
- 14:Quartz +
- 15:Chlorite +
- 16:Mix

Figure B1.15: Sample S2 site 14 (SEM). Multiple lithic clasts ?siltstones containing quartz and chlorite.



Table B1.1: EDS analyses of sample S2.

| Sample | Site | Position | Mineral  | SiO2  | TiO2  | Al2O3 | FeO   | MnO  | MgO  | CaO  | Na2O | K2O  | P2O5 | SO3  | F | Cr2O3 | WO3  | Total | Actual Total |
|--------|------|----------|----------|-------|-------|-------|-------|------|------|------|------|------|------|------|---|-------|------|-------|--------------|
| S2     | 1    | 1        | Feohy    | 4.34  |       | 1.11  | 90.78 | 3.15 | 0.63 |      |      |      |      |      |   |       |      | 100   | 77           |
| S2     | 1    | 2        | Sepchl   | 21.92 | 1.56  | 12.97 | 62.17 |      |      |      | 0.63 | 0.75 |      |      |   |       |      | 100   | 85           |
| S2     | 1    | 3        | Sepchl   | 28.15 |       | 15.48 | 54.60 |      | 0.66 |      |      | 1.12 |      |      |   |       |      | 100   | 90           |
| S2     | 1    | 4        | Qz       | 99.39 |       |       | 0.61  |      |      |      |      |      |      |      |   |       |      | 100   | 124          |
| S2     | 1    | 5        | Sepchl   | 26.55 | 0.44  | 15.45 | 54.49 |      | 0.93 | 0.32 | 0.80 | 1.04 |      |      |   |       |      | 100   | 92           |
| S2     | 1    | 6        | Sepchl   | 38.08 |       | 15.57 | 41.14 |      | 1.07 |      |      | 1.32 |      |      |   |       | 2.83 | 100   | 89           |
| S2     | 1    | 7        | Chl +    | 25.95 | 0.33  | 17.35 | 35.62 |      | 0.96 | 0.26 | 0.47 | 1.59 |      |      |   |       | 2.47 | 85    | 89           |
| S2     | 1    | 8        | TiO2     |       | 99.51 |       | 0.49  |      |      |      |      |      |      |      |   |       |      | 100   | 108          |
| S2     | 1    | 9        | Sepchl   | 30.39 |       | 19.41 | 42.86 |      | 1.14 | 0.29 | 0.73 | 1.56 | 0.84 |      |   |       | 2.78 | 100   | 87           |
| S2     | 1    | 10       | Sepchl   | 26.55 |       | 18.67 | 51.23 |      | 0.84 |      |      | 1.30 | 0.76 | 0.66 |   |       |      | 100   | 91           |
| S2     | 1    | 11       | Sepchl   | 22.35 | 0.40  | 17.96 | 53.02 |      | 1.13 | 0.32 | 0.50 | 1.41 |      |      |   |       | 2.91 | 100   | 88           |
| S2     | 1    | 12       | Chl +    | 43.42 | 0.46  | 18.11 | 32.29 |      | 1.57 | 0.45 | 0.72 | 2.13 | 0.85 |      |   |       |      | 100   | 92           |
| S2     | 1    | 13       | Sme      | 64.92 |       | 11.74 | 20.80 |      | 0.93 |      |      | 1.62 |      |      |   |       |      | 100   | 98           |
| S2     | 2    | 1        | Qz       | 98.32 |       | 0.53  | 1.16  |      |      |      |      |      |      |      |   |       |      | 100   | 118          |
| S2     | 2    | 2        | Qz       | 99.00 |       | 0.41  | 0.60  |      |      |      |      |      |      |      |   |       |      | 100   | 121          |
| S2     | 2    | 3        | Sepchl   | 26.13 | 0.36  | 14.12 | 56.07 |      | 0.65 | 0.26 | 0.50 | 0.97 | 0.93 |      |   |       |      | 100   | 92           |
| S2     | 2    | 4        | Chl      | 24.92 | 0.53  | 14.31 | 39.83 |      | 0.71 |      | 0.43 | 0.92 |      |      |   |       | 3.35 | 85    | 81           |
| S2     | 3    | 1        | Qz       | 99.56 |       |       | 0.44  |      |      |      |      |      |      |      |   |       |      | 100   | 120          |
| S2     | 3    | 2        | Chl +    | 28.87 | 0.54  | 12.43 | 40.55 |      | 0.71 |      |      | 1.13 | 0.79 |      |   |       |      | 85    | 92           |
| S2     | 4    | 1        | Sepchl   | 22.53 | 0.76  | 14.88 | 56.49 |      | 0.92 | 0.35 |      | 0.92 |      |      |   |       | 3.14 | 100   | 79           |
| S2     | 4    | 2        | Sepchl   | 26.70 | 0.38  | 19.90 | 45.46 |      | 1.02 | 0.31 |      | 1.41 | 0.75 |      |   |       | 4.07 | 100   | 91           |
| S2     | 4    | 3        | Sepchl   | 18.28 | 0.41  | 11.32 | 66.75 |      | 0.76 |      | 0.49 | 0.36 | 0.86 | 0.76 |   |       |      | 100   | 85           |
| S2     | 4    | 4        | Qz       | 99.57 |       |       | 0.43  |      |      |      |      |      |      |      |   |       |      | 100   | 118          |
| S2     | 4    | 5        | Sepchl   | 17.90 | 0.39  | 8.16  | 68.39 |      | 0.95 | 0.31 |      | 0.68 |      |      |   |       | 3.22 | 100   | 90           |
| S2     | 4    | 6        | Sepchl   | 28.64 | 0.53  | 10.24 | 54.40 |      | 1.20 | 0.26 | 0.47 | 1.11 |      |      |   | 0.34  | 2.81 | 100   | 91           |
| S2     | 4    | 7        | Sepchl   | 21.37 |       | 12.77 | 62.08 |      | 0.80 |      |      | 0.86 |      |      |   |       | 2.11 | 100   | 87           |
| S2     | 4    | 8        | Feohy +  | 3.71  |       | 0.94  | 95.35 |      |      |      |      |      |      |      |   |       |      | 100   | 82           |
| S2     | 4    | 9        | Sepchl + | 18.11 |       | 15.51 | 59.00 |      | 0.81 |      |      | 0.76 | 0.83 |      |   |       | 4.99 | 100   | 86           |

Table B1.1: EDS analyses of sample S2.

| Sample | Site | Position | Mineral | SiO2   | TiO2 | Al2O3 | FeO   | MnO  | MgO  | CaO  | Na2O | K2O  | P2O5 | SO3  | F    | Cr2O3 | WO3  | Total | Actual Total |
|--------|------|----------|---------|--------|------|-------|-------|------|------|------|------|------|------|------|------|-------|------|-------|--------------|
| S2     | 4    | 10       | Sepchl  | 24.54  |      | 17.36 | 52.00 |      | 1.01 |      |      | 1.07 |      |      |      |       | 4.02 | 100   | 87           |
| S2     | 5    | 1        | Qz      | 99.60  |      |       | 0.40  |      |      |      |      |      |      |      |      |       |      | 100   | 120          |
| S2     | 5    | 2        | Qz      | 99.68  |      |       | 0.32  |      |      |      |      |      |      |      |      |       |      | 100   | 122          |
| S2     | 5    | 3        | Feohy + | 3.26   |      | 6.06  | 86.63 |      | 0.75 |      |      |      |      |      |      |       | 3.29 | 100   | 84           |
| S2     | 5    | 4        | Feohy + | 4.04   |      | 6.06  | 86.42 |      | 0.71 |      |      |      |      |      |      |       | 2.77 | 100   | 85           |
| S2     | 5    | 5        | Sepchl  | 24.93  | 0.44 | 12.03 | 55.98 |      | 1.25 |      | 0.48 | 1.41 |      |      |      |       | 3.48 | 100   | 90           |
| S2     | 5    | 6        | Feohy + | 8.93   |      | 7.20  | 79.19 |      | 0.89 |      |      | 0.49 |      |      |      |       | 3.31 | 100   | 88           |
| S2     | 6    | 1        | Kln     | 47.24  |      | 35.70 | 4.06  |      |      |      |      |      |      |      |      |       |      | 87    | 80           |
| S2     | 6    | 2        | Mix     | 78.66  |      | 6.33  | 14.11 |      | 0.45 |      |      | 0.45 |      |      |      |       |      | 100   | 107          |
| S2     | 6    | 3        | Chl     | 27.89  | 0.44 | 15.30 | 36.37 |      | 0.93 |      | 0.46 | 1.04 |      |      |      |       | 2.58 | 85    | 91           |
| S2     | 6    | 4        | Feohy + | 12.69  |      | 10.73 | 71.60 | 1.67 | 0.65 |      |      | 0.32 | 1.37 | 0.98 |      |       |      | 100   | 82           |
| S2     | 6    | 5        | Feohy + | 9.62   |      | 11.13 | 75.11 | 1.56 |      |      |      | 0.35 | 1.28 | 0.94 |      |       |      | 100   | 82           |
| S2     | 7    | 1        | Chl     | 24.56  | 0.38 | 17.66 | 36.76 |      | 0.81 |      | 0.43 | 1.02 |      |      |      |       | 3.37 | 85    | 82           |
| S2     | 7    | 2        | Sepchl  | 22.21  | 0.87 | 14.44 | 58.32 |      | 0.59 |      |      | 0.82 |      |      |      |       | 2.73 | 100   | 86           |
| S2     | 7    | 3        | Chl +   | 46.36  | 0.34 | 16.64 | 29.94 |      | 1.19 |      | 0.57 | 1.24 |      |      |      |       | 3.71 | 100   | 96           |
| S2     | 7    | 4        | Chl +   | 27.02  |      | 18.43 | 33.25 |      | 0.76 |      | 0.47 | 1.12 |      |      |      |       | 3.95 | 85    | 89           |
| S2     | 7    | 5        | Mix     | 73.99  | 0.46 | 9.07  | 7.83  | 3.39 | 0.60 |      | 0.54 | 0.72 |      |      |      |       | 3.39 | 100   | 91           |
| S2     | 7    | 6        | Chl +   | 29.53  | 0.54 | 12.66 | 35.61 |      | 1.27 | 0.25 | 0.43 | 1.23 |      |      |      |       | 3.47 | 85    | 98           |
| S2     | 7    | 7        | Qz +    | 88.92  |      | 8.10  | 1.72  |      | 0.62 |      |      | 0.65 |      |      |      |       |      | 100   | 110          |
| S2     | 8    | 1        | Qz      | 100.00 |      |       |       |      |      |      |      |      |      |      |      |       |      | 100   | 122          |
| S2     | 8    | 2        | Mix     | 24.19  |      | 6.89  | 66.73 |      | 0.47 |      |      | 0.73 | 0.99 |      |      |       |      | 100   | 95           |
| S2     | 8    | 3        | Feohy + | 12.15  |      | 5.93  | 80.20 |      |      |      |      | 0.62 | 1.11 |      |      |       |      | 100   | 89           |
| S2     | 8    | 4        | Chl +   | 38.88  | 0.53 | 18.20 | 23.39 |      | 1.50 |      | 0.54 | 1.97 |      |      |      |       |      | 85    | 86           |
| S2     | 9    | 1        | Qz      | 98.49  |      | 0.35  | 1.16  |      |      |      |      |      |      |      |      |       |      | 100   | 122          |
| S2     | 9    | 2        | Feohy + | 10.46  | 0.43 | 7.02  | 77.89 |      |      |      | 0.62 |      | 0.89 |      |      |       | 2.70 | 100   | 88           |
| S2     | 9    | 3        | Ms      | 48.64  | 0.32 | 30.88 | 2.72  |      | 0.97 |      | 1.20 | 8.43 |      |      | 1.84 |       |      | 95    | 74           |
| S2     | 9    | 4        | Ms      | 48.44  | 0.32 | 32.95 | 2.37  |      | 0.88 |      | 1.15 | 8.88 |      |      |      |       |      | 95    | 103          |
| S2     | 9    | 5        | Feohy + | 13.97  |      | 7.47  | 75.30 |      |      |      |      | 1.90 | 1.36 |      |      |       |      | 100   | 88           |

Table B1.1: EDS analyses of sample S2.

| Sample | Site | Position | Mineral | SiO2  | TiO2  | Al2O3 | FeO   | MnO | MgO  | CaO  | Na2O | K2O  | P2O5 | SO3 | F | Cr2O3 | WO3  | Total | Actual Total |
|--------|------|----------|---------|-------|-------|-------|-------|-----|------|------|------|------|------|-----|---|-------|------|-------|--------------|
| S2     | 9    | 6        | Qz      | 96.33 |       | 1.06  | 2.44  |     |      |      |      | 0.17 |      |     |   |       |      | 100   | 120          |
| S2     | 9    | 7        | Chl +   | 45.56 | 0.38  | 17.75 | 31.00 |     | 2.06 |      | 0.96 | 2.28 |      |     |   |       |      | 100   | 98           |
| S2     | 10   | 1        | Qz      | 99.43 |       |       | 0.57  |     |      |      |      |      |      |     |   |       |      | 100   | 124          |
| S2     | 10   | 2        | Chl     | 30.70 |       | 21.47 | 30.69 |     | 0.88 |      | 0.48 | 0.78 |      |     |   |       |      | 85    | 88           |
| S2     | 10   | 3        | Chl +   | 26.43 | 0.44  | 17.36 | 35.31 |     | 0.78 |      | 0.40 | 1.45 | 0.84 |     |   |       | 1.99 | 85    | 90           |
| S2     | 10   | 4        | TiO2 +  | 8.67  | 75.75 | 5.97  | 9.25  |     |      |      |      | 0.35 |      |     |   |       |      | 100   | 98           |
| S2     | 10   | 5        | Qz      | 98.79 |       | 0.76  | 0.45  |     |      |      |      |      |      |     |   |       |      | 100   | 120          |
| S2     | 11   | 1        | Ms +    | 56.95 | 0.31  | 19.76 | 8.33  |     | 2.76 |      | 0.51 | 6.37 |      |     |   |       |      | 95    | 85           |
| S2     | 11   | 2        | Sepchl  | 25.90 |       | 10.98 | 58.58 |     | 0.78 |      | 0.44 | 1.32 | 0.78 |     |   |       | 1.21 | 100   | 97           |
| S2     | 11   | 3        | Chl +   | 36.26 | 0.29  | 12.45 | 31.27 |     | 1.06 |      | 0.49 | 1.32 |      |     |   |       | 1.87 | 85    | 98           |
| S2     | 11   | 4        | Sepchl  | 19.44 | 0.43  | 11.26 | 64.92 |     | 0.86 | 0.32 | 0.74 | 0.82 | 1.22 |     |   |       |      | 100   | 89           |
| S2     | 11   | 5        | Chl +   | 25.82 | 0.70  | 17.40 | 34.64 |     | 1.04 |      | 0.70 | 1.33 |      |     |   | 0.30  | 3.08 | 85    | 97           |
| S2     | 11   | 6        | Chl +   | 28.32 |       | 16.21 | 35.00 |     | 1.20 |      | 0.69 | 1.53 |      |     |   |       | 2.06 | 85    | 95           |
| S2     | 11   | 7        | Qz      | 99.45 |       |       | 0.55  |     |      |      |      |      |      |     |   |       |      | 100   | 121          |
| S2     | 11   | 8        | Chl +   | 35.10 |       | 13.61 | 32.47 |     | 1.06 |      | 0.72 | 2.04 |      |     |   |       |      | 85    | 95           |
| S2     | 11   | 9        | Chl +   | 28.35 | 0.43  | 19.20 | 32.53 |     | 0.94 |      | 0.33 | 1.18 |      |     |   |       | 2.04 | 85    | 96           |
| S2     | 11   | 10       | Sd      | 5.76  |       | 4.04  | 44.99 |     |      |      |      | 0.78 |      |     |   |       | 0.43 | 56    | 34           |
| S2     | 11   | 11       | Chl     | 27.32 |       | 18.75 | 34.86 |     | 0.91 |      |      | 1.08 |      |     |   |       | 2.09 | 85    | 95           |
| S2     | 11   | 12       | Chl +   | 53.52 |       | 12.36 | 29.29 |     | 0.82 |      | 0.51 | 1.32 |      |     |   |       | 2.17 | 100   | 95           |
| S2     | 12   | 1        | Qz      | 99.33 |       |       | 0.67  |     |      |      |      |      |      |     |   |       |      | 100   | 122          |
| S2     | 12   | 2        | Qz      | 99.33 |       |       | 0.67  |     |      |      |      |      |      |     |   |       |      | 100   | 120          |
| S2     | 12   | 3        | Sepchl  | 21.74 | 0.67  | 15.55 | 56.42 |     | 0.72 | 0.29 | 0.53 | 0.80 | 1.17 |     |   |       | 2.11 | 100   | 94           |
| S2     | 12   | 4        | Sepchl  | 16.80 | 0.63  | 11.24 | 65.61 |     | 0.81 |      |      | 1.29 | 0.98 |     |   |       | 2.65 | 100   | 84           |
| S2     | 12   | 5        | Chl +   | 38.55 | 0.37  | 15.73 | 41.45 |     | 1.52 |      | 0.86 | 1.52 |      |     |   |       |      | 100   | 96           |
| S2     | 12   | 6        | Chl     | 29.20 | 0.52  | 12.75 | 39.31 |     | 0.99 |      | 0.72 | 0.73 | 0.77 |     |   |       |      | 85    | 95           |
| S2     | 13   | 1        | Qz      | 98.84 |       | 0.50  | 0.66  |     |      |      |      |      |      |     |   |       |      | 100   | 121          |
| S2     | 13   | 2        | Feohy + | 12.59 |       | 7.97  | 75.80 |     |      |      |      | 0.46 | 0.94 |     |   |       | 2.25 | 100   | 88           |
| S2     | 13   | 3        | Chl +   | 32.55 | 0.31  | 13.52 | 32.78 |     | 1.09 |      | 0.51 | 1.52 |      |     |   |       | 2.71 | 85    | 88           |

Table B1.1: EDS analyses of sample S2.

| Sample | Site                                          | Position | Mineral | SiO2  | TiO2  | Al2O3 | FeO   | MnO   | MgO  | CaO  | Na2O | K2O  | P2O5 | SO3  | F     | Cr2O3 | WO3   | Total | Actual Total |
|--------|-----------------------------------------------|----------|---------|-------|-------|-------|-------|-------|------|------|------|------|------|------|-------|-------|-------|-------|--------------|
| S2     | 13                                            | 4        | Sepchl  | 17.03 |       | 8.60  | 67.76 |       | 0.65 |      | 0.47 | 0.74 | 0.96 |      |       |       | 3.79  | 100   | 93           |
| S2     | 13                                            | 5        | Sepchl  | 24.31 | 0.43  | 14.87 | 54.34 |       | 0.82 |      | 0.55 | 0.62 |      |      |       |       | 4.06  | 100   | 86           |
| S2     | 13                                            | 6        | Sepchl  | 31.38 |       | 12.67 | 52.64 |       | 1.01 |      |      | 1.45 | 0.84 |      |       |       |       | 100   | 95           |
| S2     | 13                                            | 7        | Sepchl  | 22.19 | 0.54  | 8.34  | 66.59 |       | 0.73 |      |      | 0.75 | 0.86 |      |       |       |       | 100   | 93           |
| S2     | 13                                            | 8        | Qz      | 98.72 |       | 0.44  | 0.85  |       |      |      |      |      |      |      |       |       |       | 100   | 122          |
| S2     | 14                                            | 1        | Chl     | 25.46 | 0.48  | 17.42 | 38.83 |       | 0.75 |      | 0.51 | 0.85 | 0.70 |      |       |       |       | 85    | 89           |
| S2     | 14                                            | 2        | Chl     | 29.06 | 0.42  | 15.37 | 36.17 |       | 0.60 |      | 0.45 | 0.97 |      |      |       |       | 1.96  | 85    | 86           |
| S2     | 14                                            | 3        | Qz      | 99.23 |       | 0.30  | 0.47  |       |      |      |      |      |      |      |       |       |       | 100   | 121          |
| S2     | 14                                            | 4        | Feohy + | 1.87  |       | 1.00  | 97.13 |       |      |      |      |      |      |      |       |       |       | 100   | 91           |
| S2     | 14                                            | 5        | Chl +   | 25.67 | 0.68  | 15.65 | 37.92 |       | 0.79 | 0.21 | 0.44 | 1.18 |      |      |       |       | 2.46  | 85    | 97           |
| S2     | 14                                            | 6        | Qz +    | 86.73 |       | 1.62  | 11.66 |       |      |      |      |      |      |      |       |       |       | 100   | 119          |
| S2     | 14                                            | 7        | Feohy + | 15.18 | 0.40  | 7.03  | 75.24 |       |      |      |      | 0.88 | 1.27 |      |       |       |       | 100   | 88           |
| S2     | 14                                            | 8        | Chl +   | 45.10 |       | 21.12 | 27.27 |       | 2.01 |      | 0.57 | 3.26 | 0.67 |      |       |       |       | 100   | 95           |
| S2     | 14                                            | 9        | Chl +   | 22.85 |       | 14.37 | 43.33 |       | 0.99 |      | 0.44 | 1.50 | 0.93 | 0.58 |       |       |       | 85    | 91           |
| S2     | 14                                            | 10       | Mix     |       | 0.54  | 9.85  | 14.68 | 49.26 |      |      |      |      |      |      | 5.52  |       | 20.15 | 100   | 61           |
| S2     | 14                                            | 11       | Mix     | 46.71 | 0.48  | 11.31 | 7.70  | 9.67  | 0.48 |      | 2.81 | 0.53 |      |      | 14.65 |       | 5.66  | 100   | 120          |
| S2     | 14                                            | 12       | Mix     |       |       | 11.56 | 16.95 | 41.68 |      |      | 1.00 |      |      |      | 8.73  |       | 20.09 | 100   | 73           |
| S2     | 14                                            | 13       | Chl     | 29.02 |       | 17.19 | 36.35 |       | 0.84 |      | 0.67 | 0.94 |      |      |       |       |       | 85    | 87           |
| S2     | 14                                            | 14       | Qz +    | 81.14 | 14.07 | 2.99  | 0.86  |       | 0.34 |      |      | 0.60 |      |      |       |       |       | 100   | 121          |
| S2     | 14                                            | 15       | Chl +   | 29.27 | 0.34  | 16.78 | 32.94 |       | 1.28 | 0.26 |      | 1.61 |      |      |       |       | 2.52  | 85    | 95           |
| S2     | 14                                            | 16       | Mix     | 18.58 | 0.50  | 15.15 | 62.97 |       | 0.60 |      |      | 0.69 | 1.52 |      |       |       |       | 100   | 84           |
|        | + = indicates that other minerals are present |          |         |       |       |       |       |       |      |      |      |      |      |      |       |       |       |       |              |
|        |                                               |          |         |       |       |       |       |       |      |      |      |      |      |      |       |       |       |       |              |
|        |                                               |          |         |       |       |       |       |       |      |      |      |      |      |      |       |       |       |       |              |

B2: SEM-BSE images and EDS mineral analyses for sample S5.

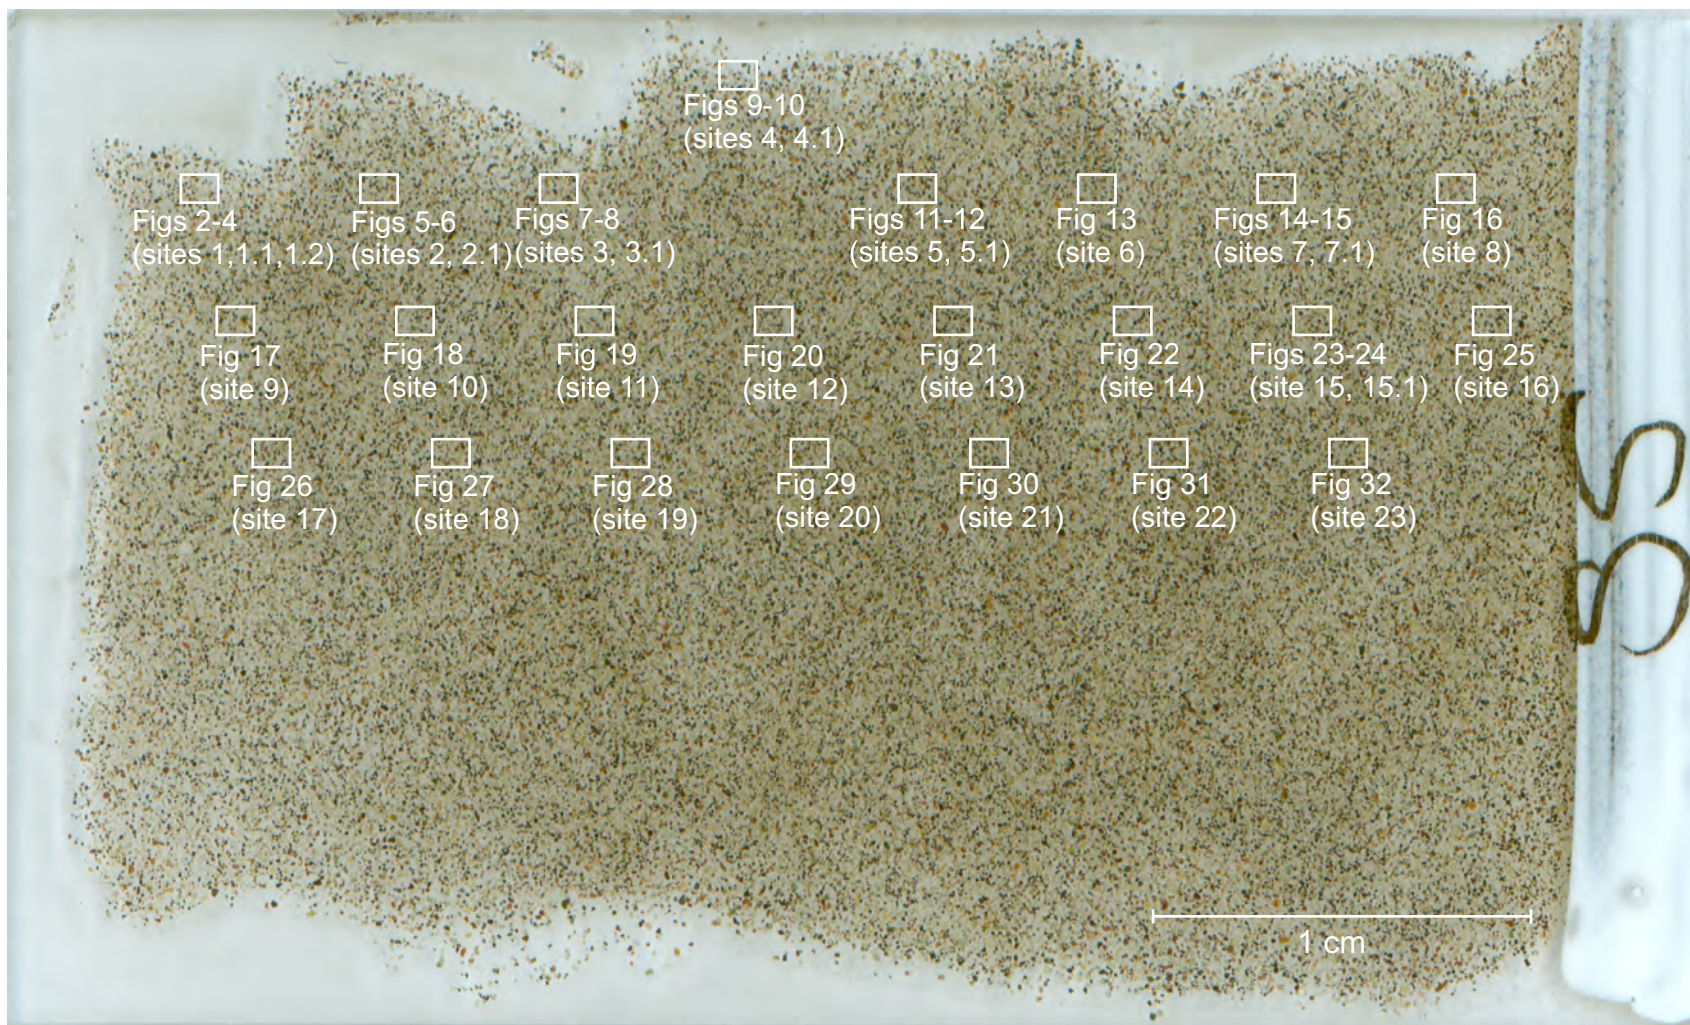

Figure B2.1: Scanned thin section of sample S5 showing the location of analysed sites. This sample comes from the Evinos River ~600m upstream from National Road bridge west side of braid plain by active channel. It consists of fine sand in lee of gravel bar.



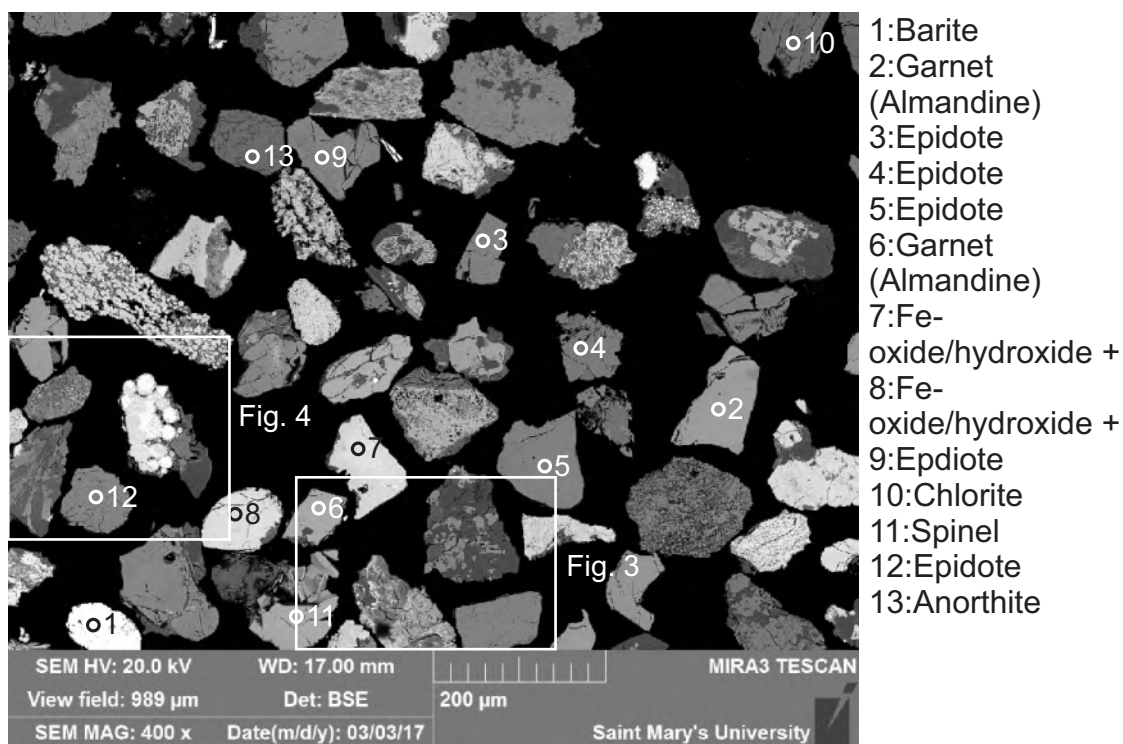

Figure B2.2: Sample S5 site 1 (SEM).

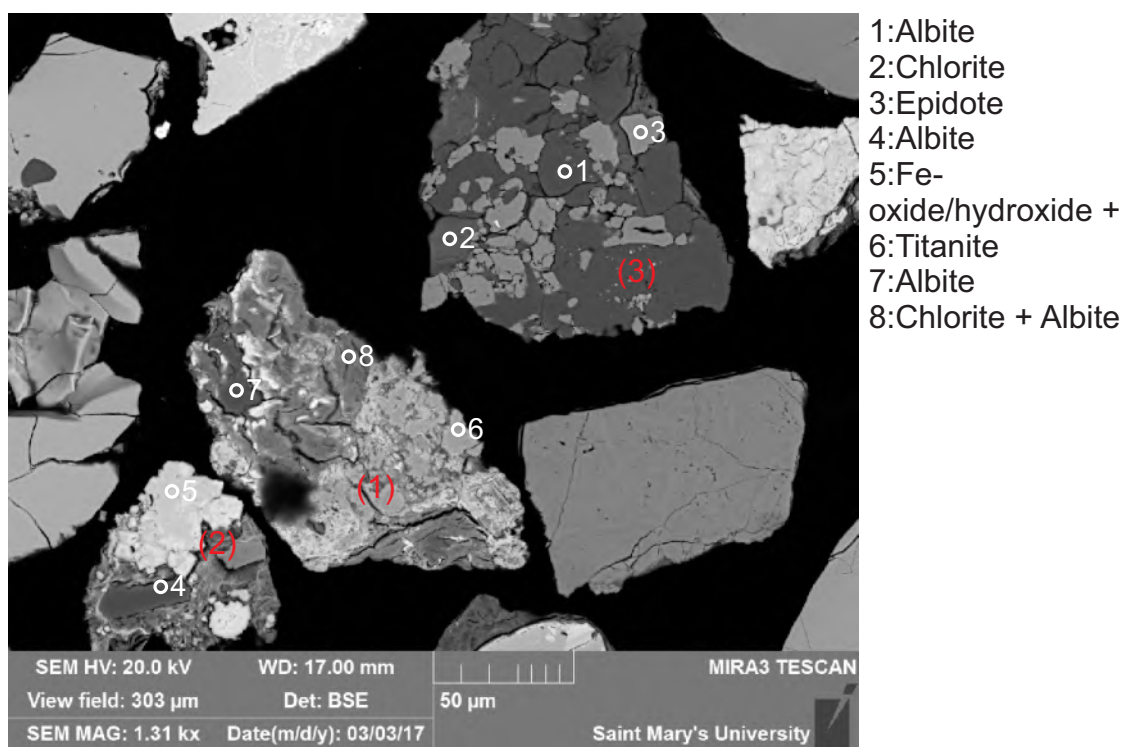

Figure B2.3: Sample S5 site 1.1 (SEM). 1: Lithic clast consisting of titanite, albite and chlorite (metamorphic). 2: clast of Fe-oxides/hydroxides and albite (metamorphic). 3: hydrothermal (vein) of albite, epidote, and chlorite.

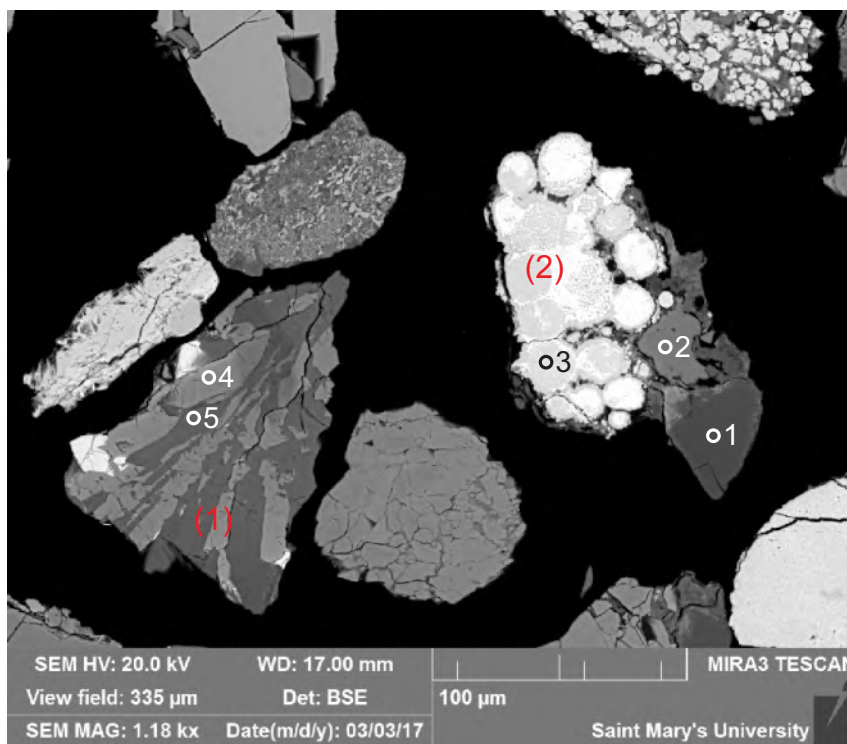

- 1:Quartz
- 2:Fluorite
- 3:Fe-oxides/hydroxide +
- 4:Clinopyroxene
- 5:Labradorite

Figure B2.4: Sample S5 site 1.2 (SEM). 1:Foliated mafic; 2: Pedogenic aggregate?

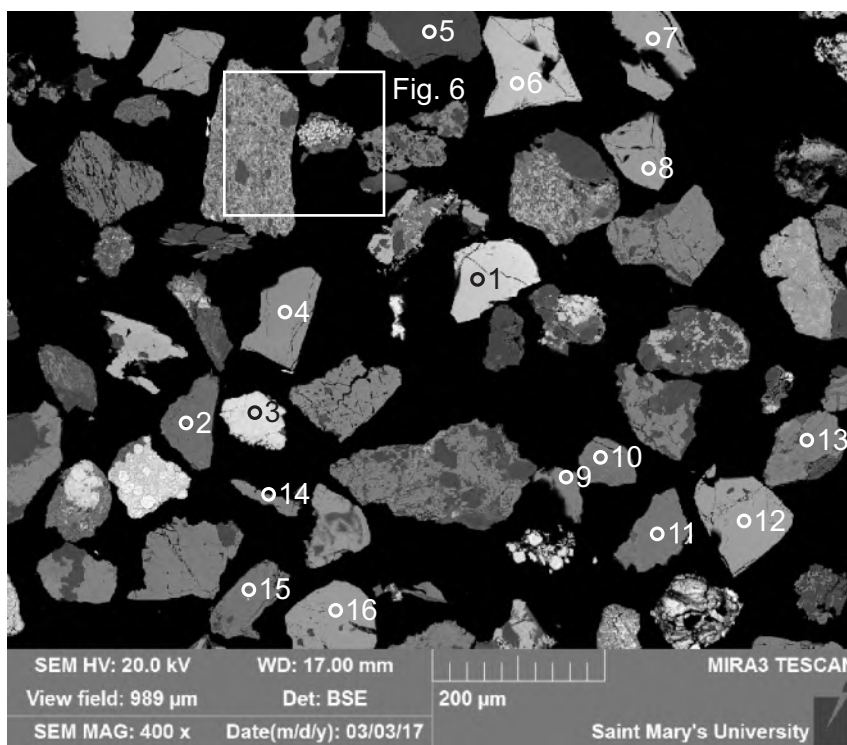

- 1:Chromite
- 2:Amphibole
- 3:Fe-oxide/hydroxide +
- 4:Garnet
- 5:Quartz
- 6:Chromite
- 7:Garnet
- 8:Titanite
- 9:Chlorite
- 10:Apatite +
- 11:Epidote
- 12:Garnet
- 13:Epidote
- 14:Epidote
- 15:Chlorite
- 16:Garnet

Figure B2.5: Sample S5 site 2 (SEM).



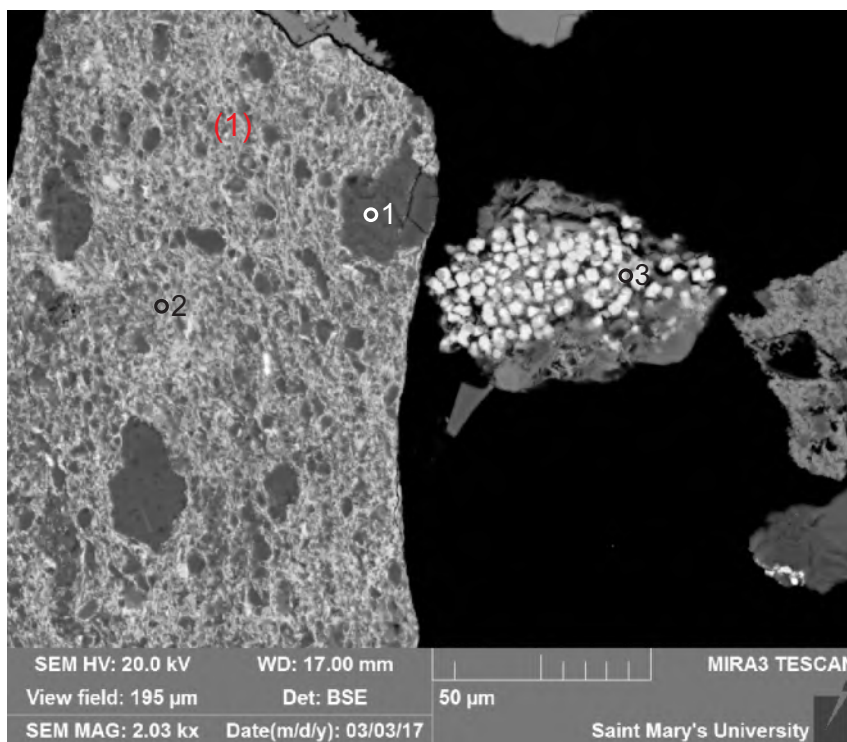

- 1:Quartz +
- 2:Chlorite + Illite
- 3:Fe-oxides/hydroxide +

Figure B2.6: Sample S5 site 2.1 (SEM). 1:Chlorite schist.

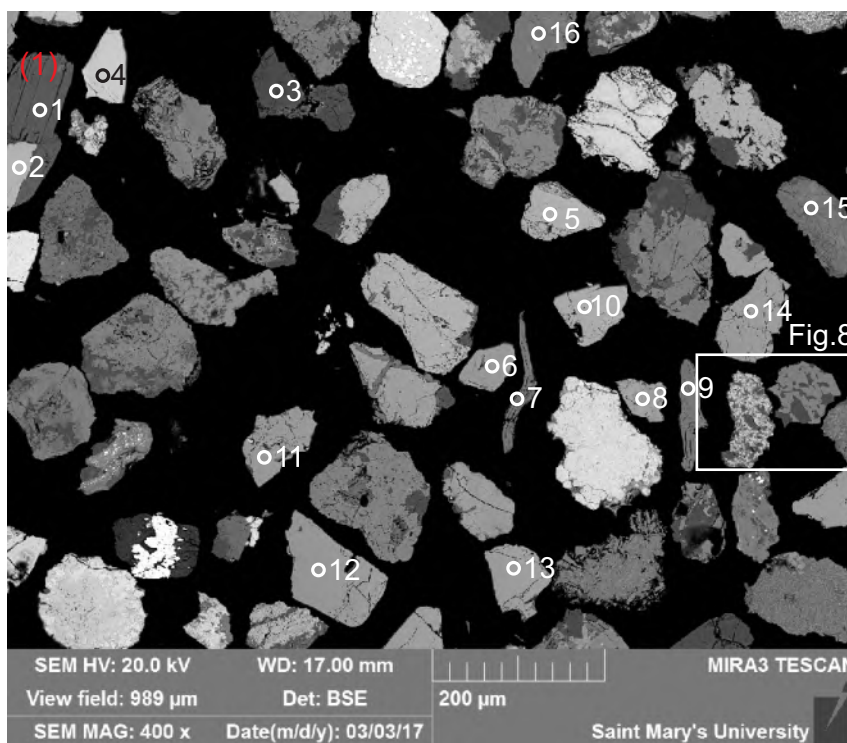

- 1:Muscovite
- 2:TiO<sub>2</sub>
- 3:Albite
- 4:Chromite
- 5:TiO<sub>2</sub>
- 6:Apatite
- 7:Chlorite
- 8:Apatite
- 9:Chlorite
- 10:Spinel
- 11:Garnet
- 12:Garnet
- 13:Garnet
- 14:Garnet
- 15:Pumpellyite
- 16:Epidote

Figure B2.7: Sample S5 site 3 (SEM). 1: Lithic clast (muscovite + TiO<sub>2</sub> (metamorphic)).

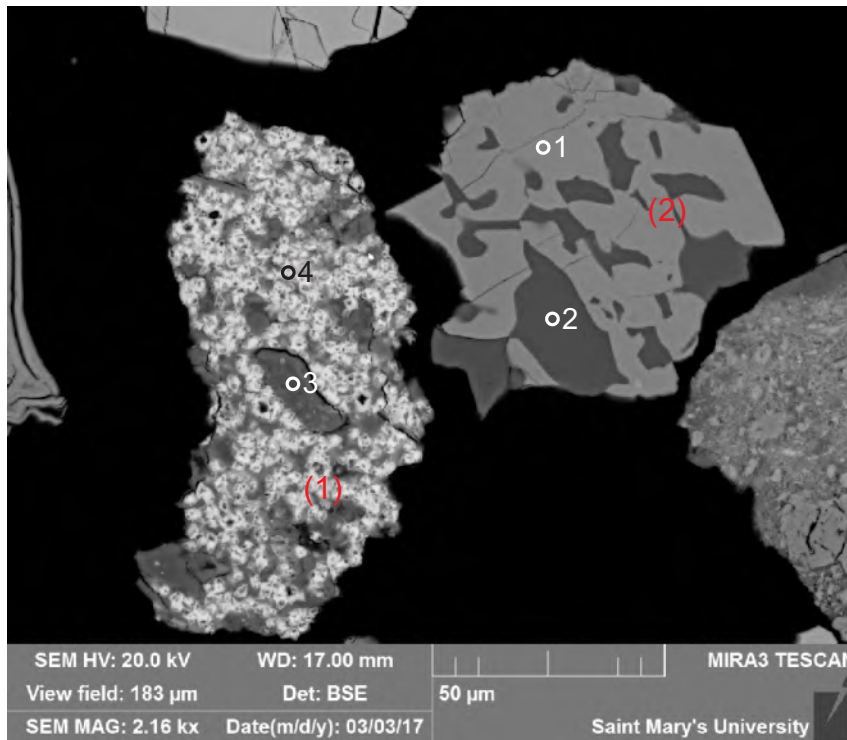

- 1:Epidote
- 2:Quartz
- 3:Tourmaline
- 4:Fe-oxides/hydroxide +

Figure B2.8: Sample S5 site 3.1 (SEM). 1:Pedogenic, 2: hydrothermal quartz + epidote (vein).

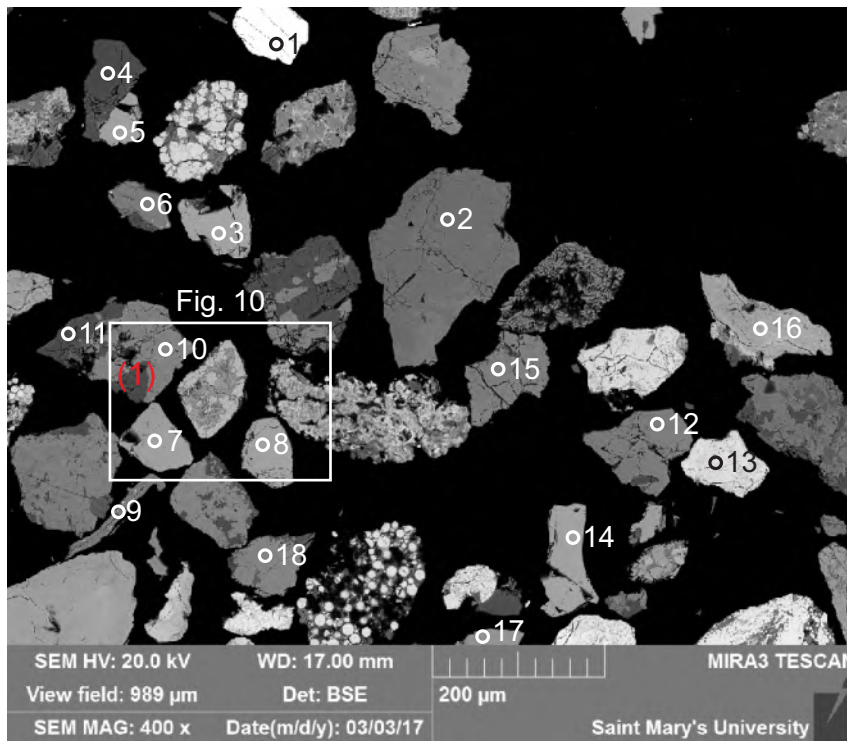

- 1:Zircon
- 2:Epidote +
- 3:Garnet
- 4:Quartz
- 5:Garnet
- 6:Chlorite
- 7:Garnet
- 8:Garnet
- 9:Biotite +
- 10:Epidote
- 11:Quartz
- 12:Clinopyroxene
- 13:Fe-oxide/hydroxide +
- 14:Garnet
- 15:Epidote
- 16:Mix
- 17:Garnet
- 18:Epidote

Figure B2.9: Sample S5 site 4 (SEM). 1: Hydrothermal epidote + quartz (vein).

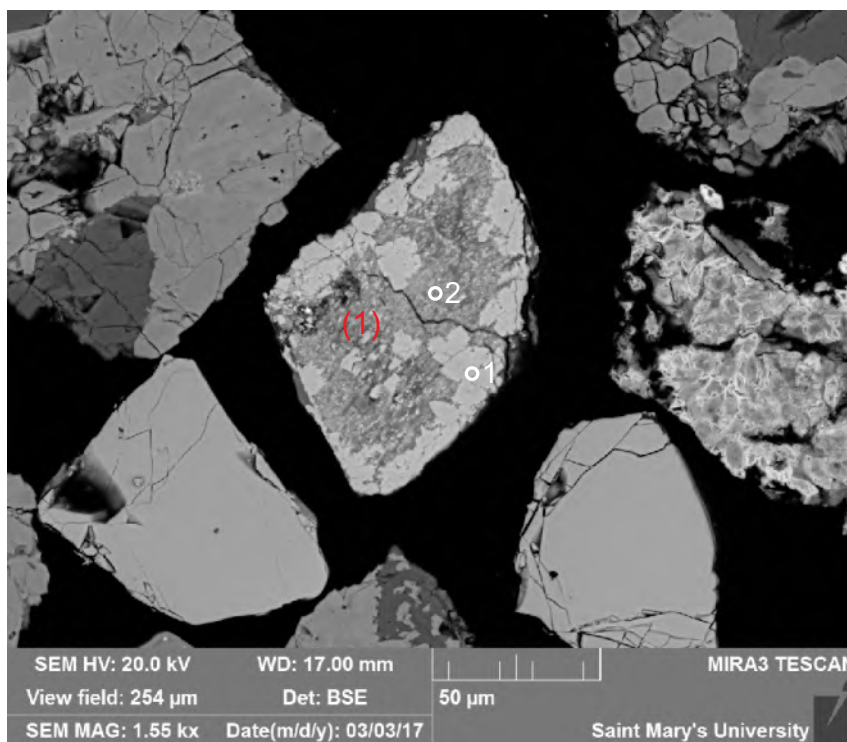

- 1:TiO<sub>2</sub> +
- 2:Chlorite + TiO<sub>2</sub>

Figure B2.10: Sample S5 site 4.1 (SEM). 1: Titania and chlorite (metamorphic).

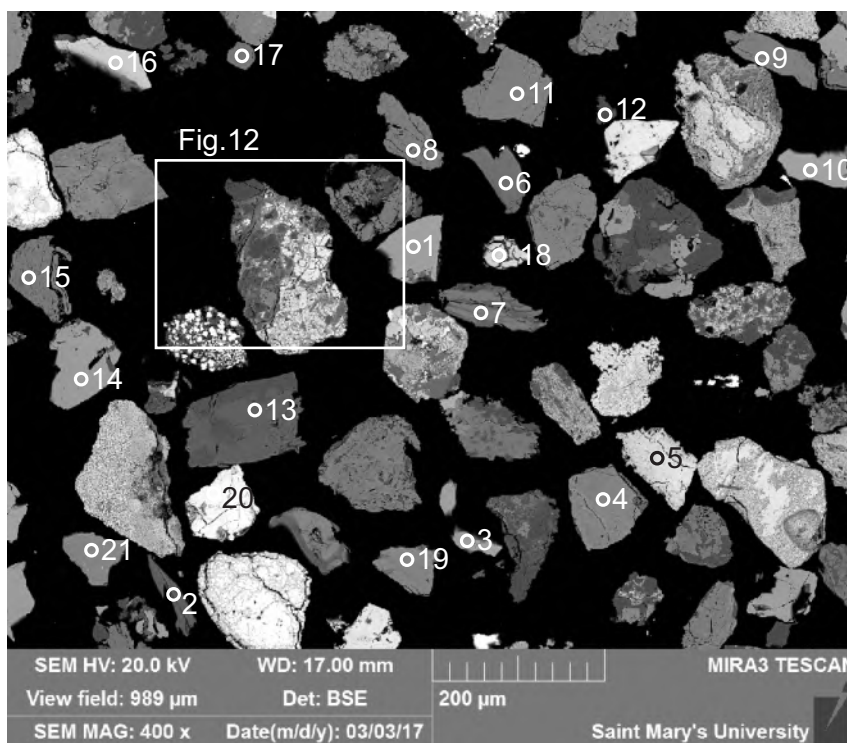

- 1:Garnet
- 2:Muscovite
- 3:Garnet
- 4:Epidote
- 5:Rhodochrosite +
- 6:Chlorite
- 7:Chlorite +
- 8:Chlorite
- 9:Chlorite
- 10:Garnet
- 11:Epidote
- 12:Albite
- 13:Muscovite
- 14:Garnet
- 15:Chlorite
- 16:Chromite
- 17:Fluorite
- 18:Fe-oxide/hydroxide +
- 19:Epidote
- 20:Fe-oxide/hydroxide +
- 21:Epidote

Figure B2.11: Sample S5 site 5 (SEM).



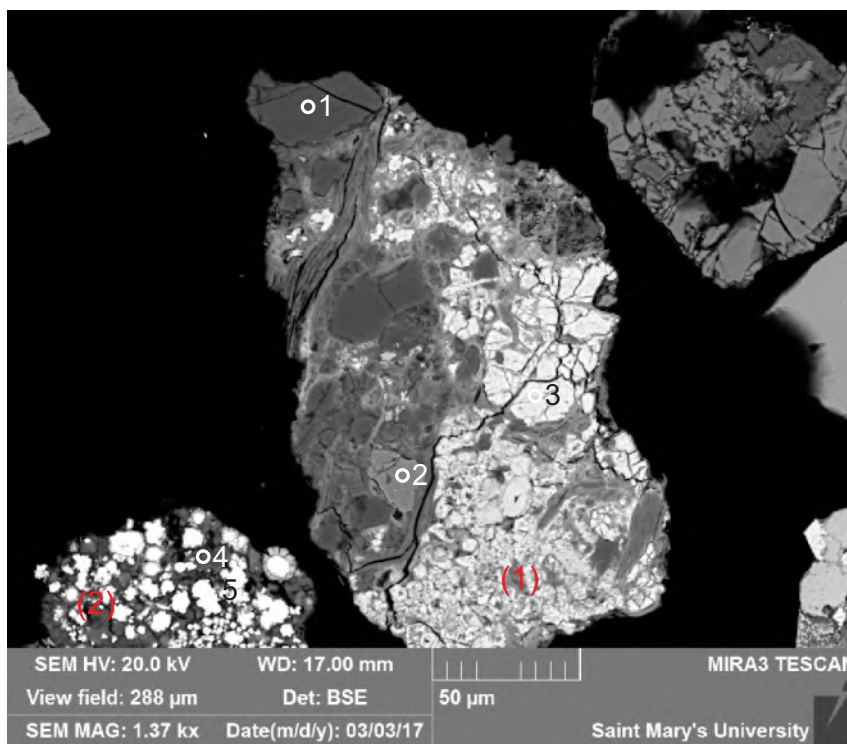

- 1:Quartz
- 2:Epidote
- 3:Fe-oxides/hydroxide +
- 4:Quartz + Muscovite
- 5:Pyrite

Figure B2.12: Sample S5 site 5.1 (SEM). 1: Altered igneous clast consisting of quartz, epidote, and Fe-oxides/hydroxides. 2: Pyrite cemented siltstone.

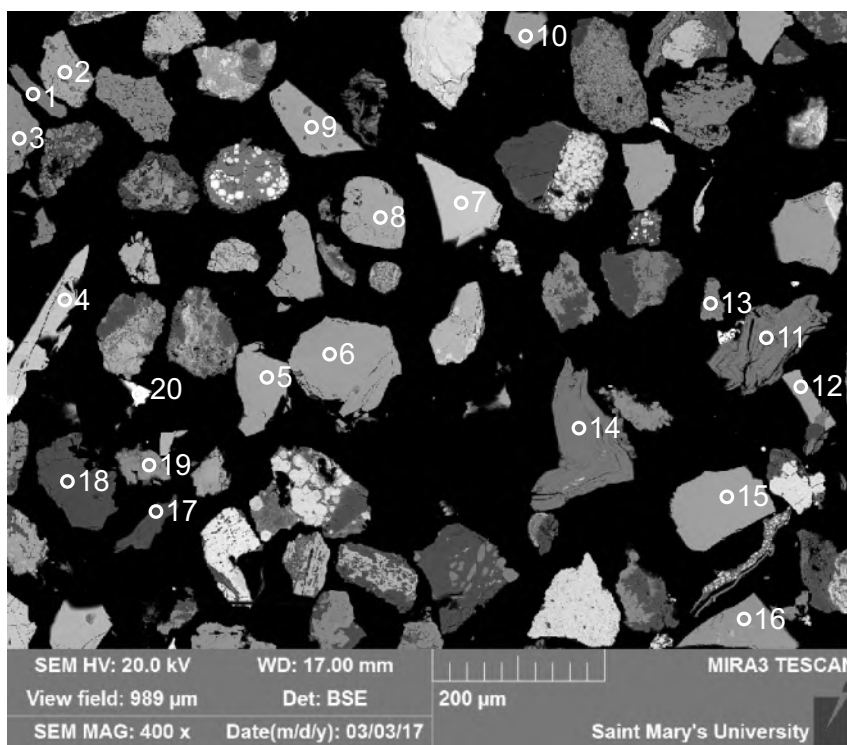

- 1:Chlorite
- 2:Garnet
- 3:Epidote
- 4:Chromite
- 5:Garnet
- 6:Garnet
- 7:Chromite
- 8:Spinel
- 9:Garnet
- 10:Garnet
- 11:Chlorite
- 12:Garnet
- 13:Epidote
- 14:Chlorite
- 15:Garnet
- 16:Garnet
- 17:Paragonite
- 18:Quartz
- 19:Chlorite
- 20:Fe-oxides/hydroxide +

Figure B2.13: Sample S5 site 6 (SEM).

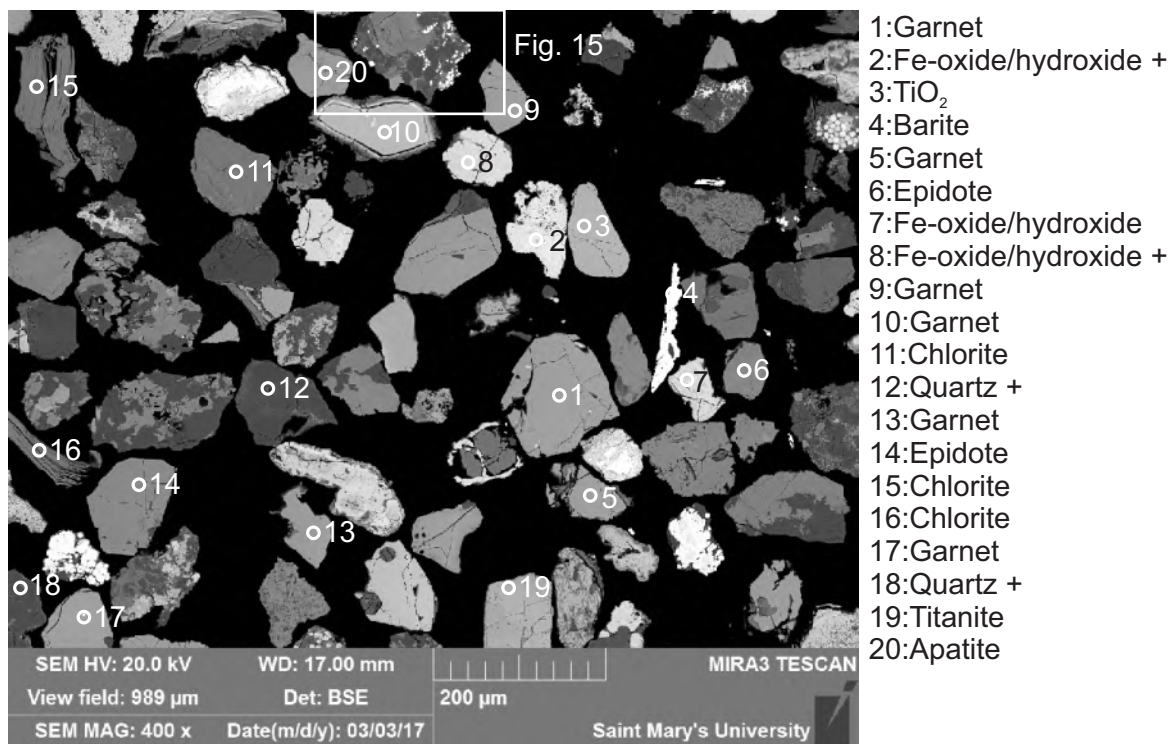

Figure B2.14: Sample S5 site 7 (SEM).

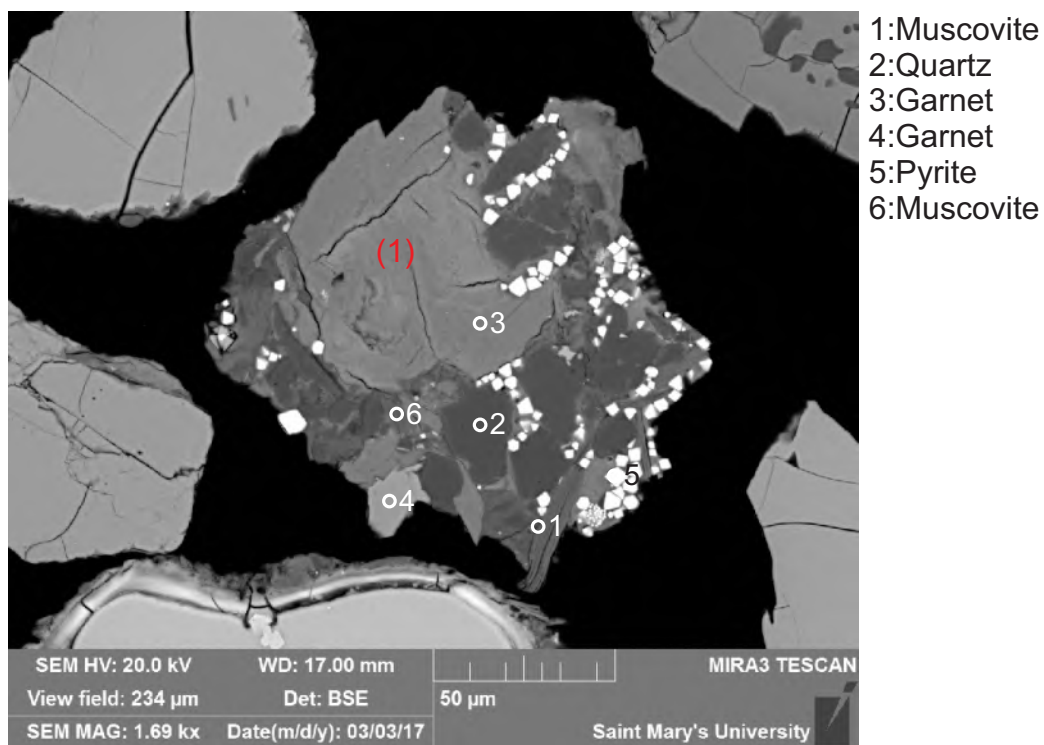

Figure B2.15: Sample S5 site 7.1 (SEM). 1: Lithic clast (?sandstone) consisting of garnet, quartz, and muscovite with pyrite framboids along intergranular boundaries.

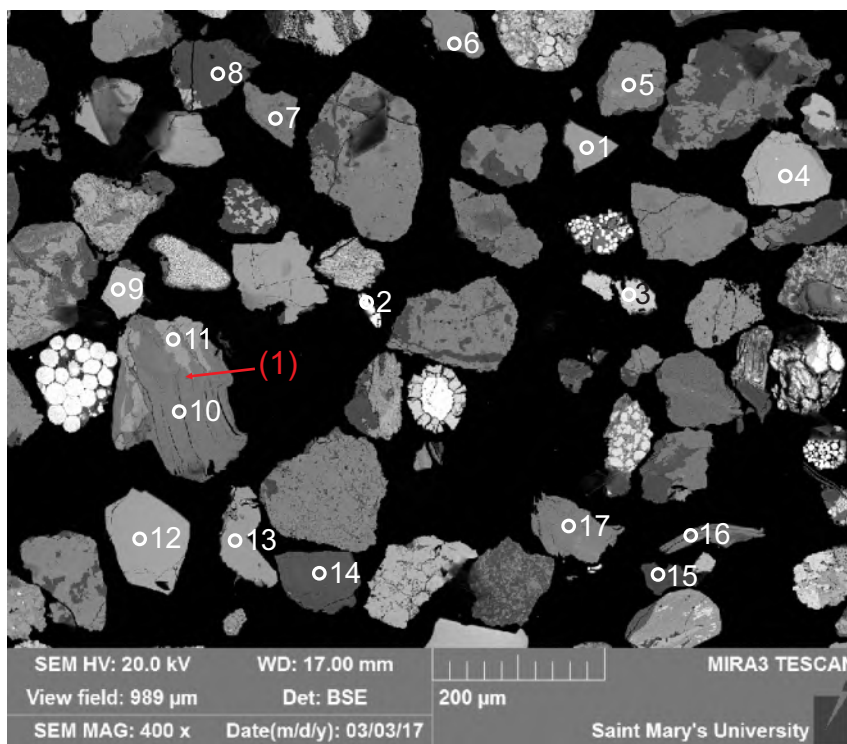

- 1: Garnet
- 2: Garbage
- 3: "Ilmenite"
- 4:  $\text{TiO}_2$
- 5: Epidote
- 6: Epidote
- 7: Chlorite + Illite +
- 8: Quartz
- 9:  $\text{TiO}_2$
- 10: Chlorite
- 11: Titanite
- 12: Spinel
- 13: Garnet
- 14: Tourmaline
- 15: Quartz
- 16: Chlorite
- 17: Chlorite

Figure B2.16: Sample S5 site 8 (SEM). Lithic clast (chlorite + titanite, metamorphic).

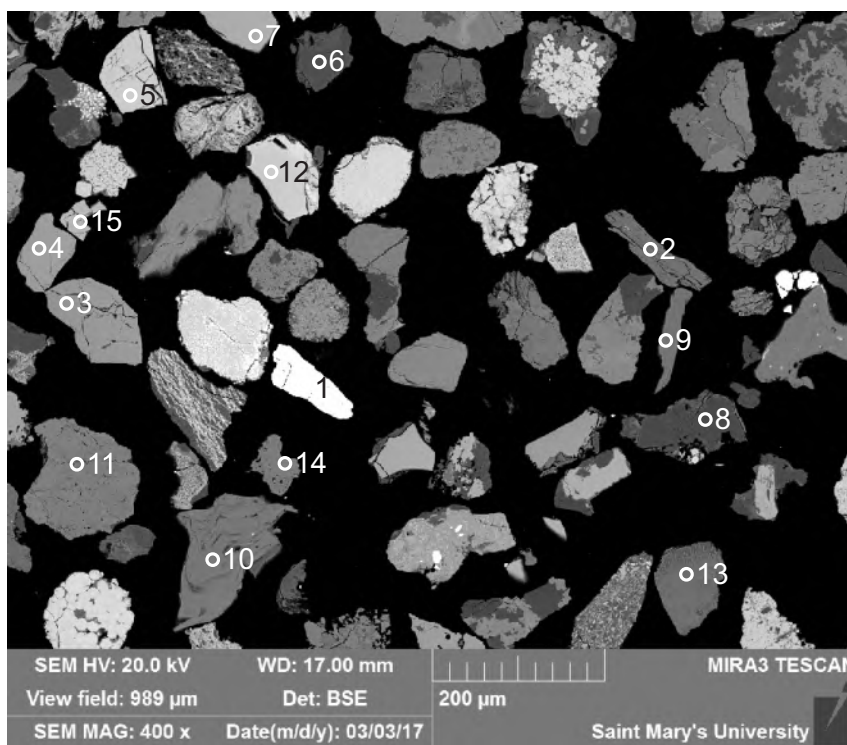

- 1: Barite
- 2: Chlorite
- 3: Apatite
- 4: Spinel
- 5: Chromite
- 6: Tourmaline +
- 7:  $\text{TiO}_2$
- 8: Quartz
- 9: Chlorite
- 10: Chlorite
- 11: Epidote
- 12: Chromite
- 13: Epidote
- 14: Epidote
- 15: Chromite

Figure B2.17: Sample S5 site 9 (SEM).



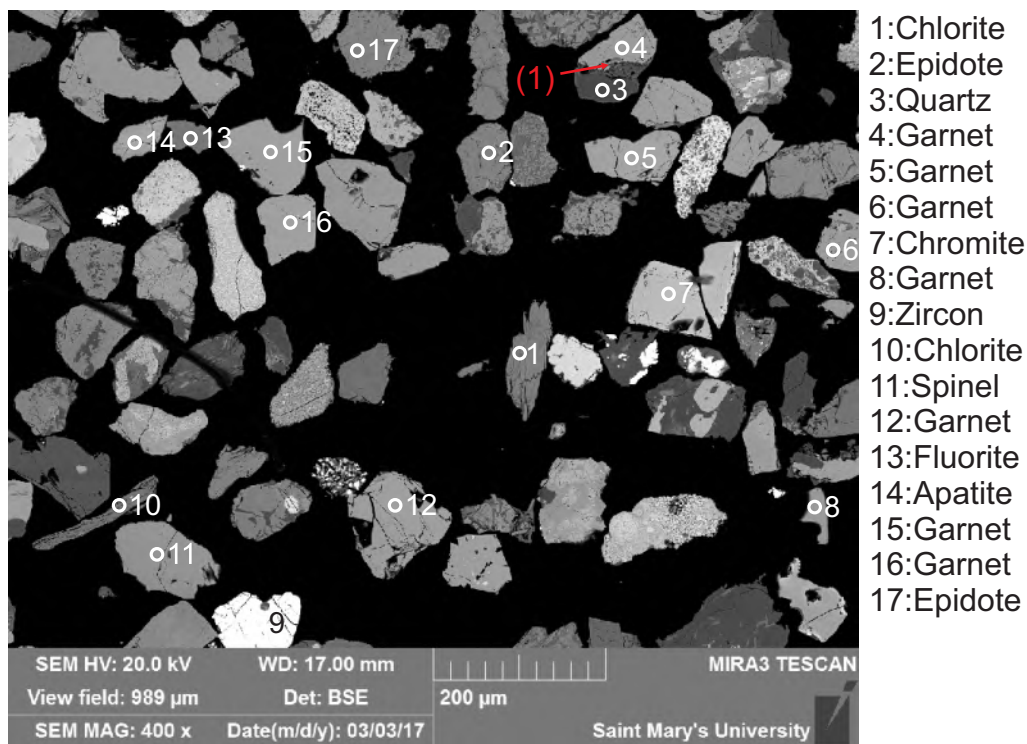

Figure B2.18: Sample S5 site 10 (SEM). 1: Lithic clast (garnet + quartz, metamorphic or sedimentary).

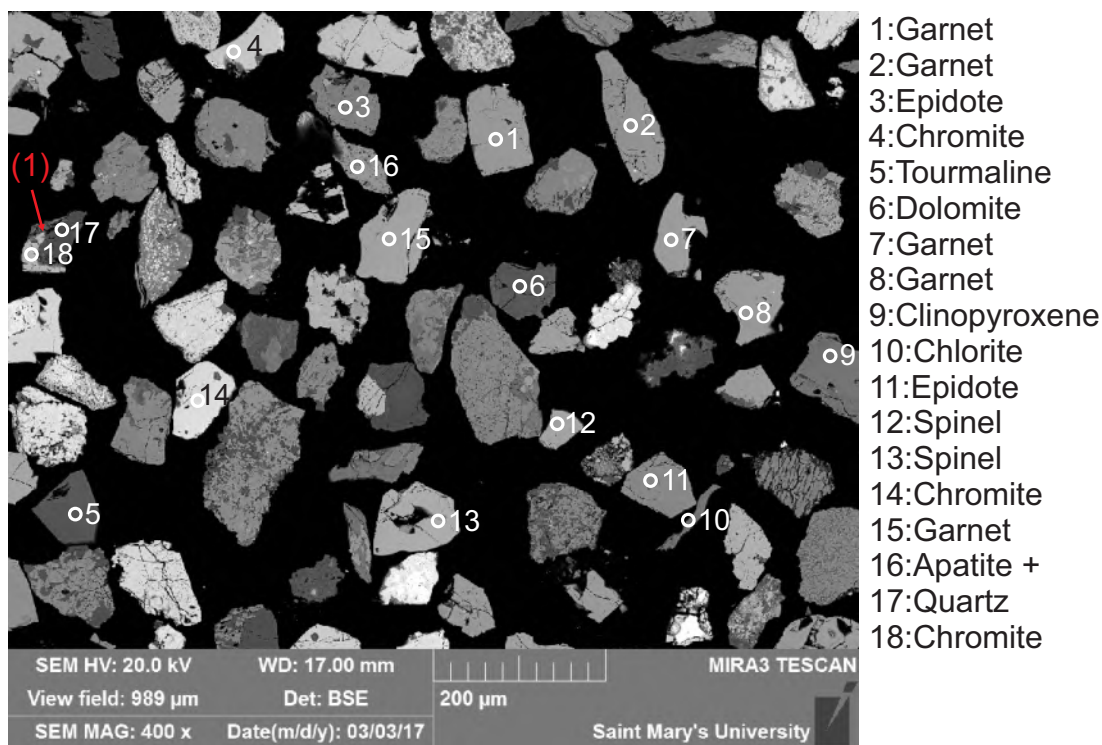

Figure B2.19: Sample S5 site 11 (SEM). Lithic clast (quartz + chromite, sandstone).

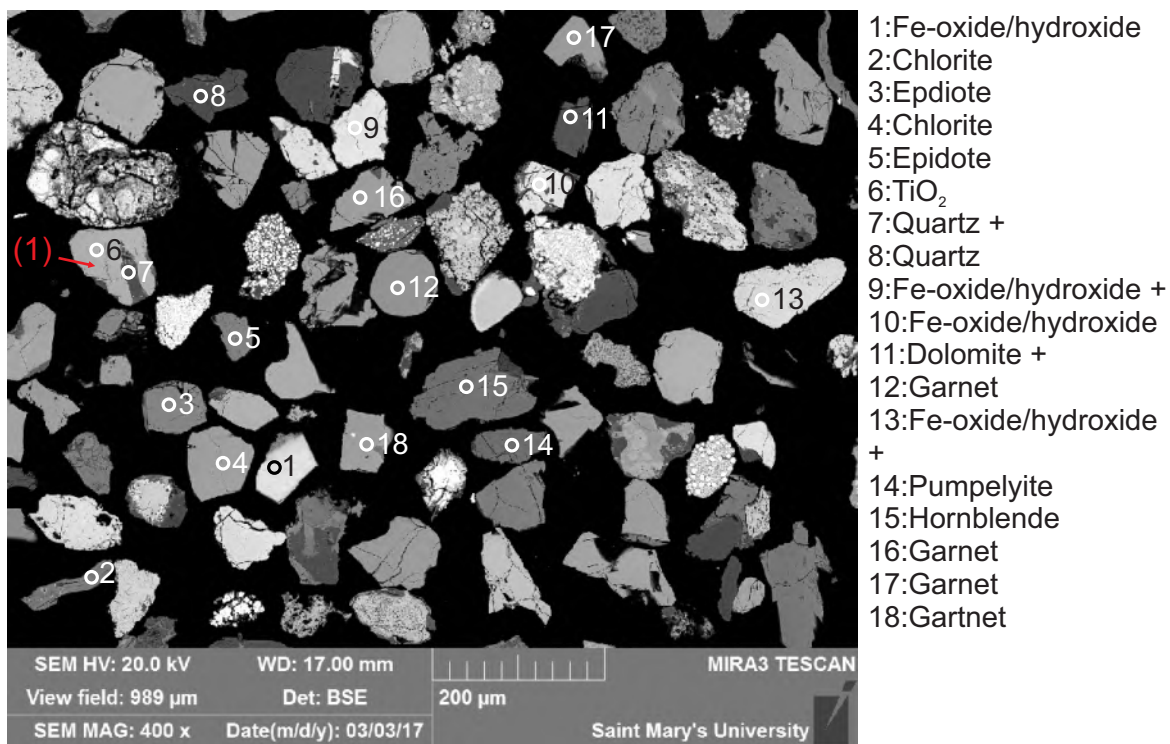

Figure B2.20: Sample S5 site 12 (SEM). 1: Lithic clast (quartz +  $\text{TiO}_2$ , metamorphic).

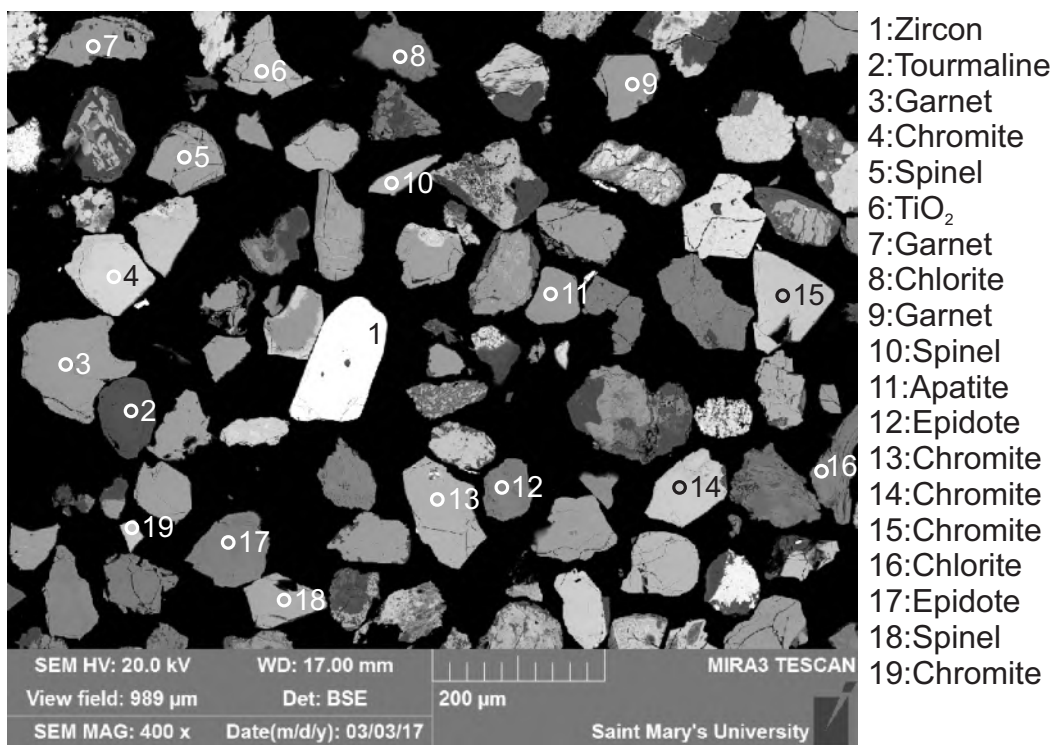

Figure B2.21: Sample S5 site 13 (SEM).



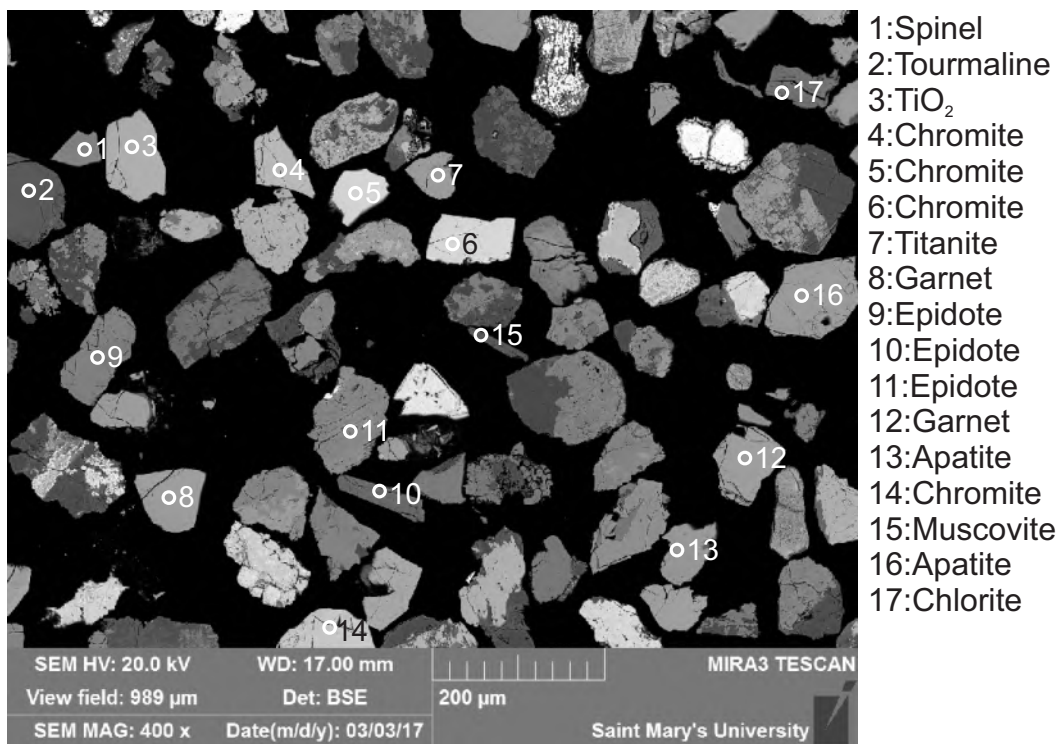

Figure B2.22: Sample S5 site 14 (SEM).

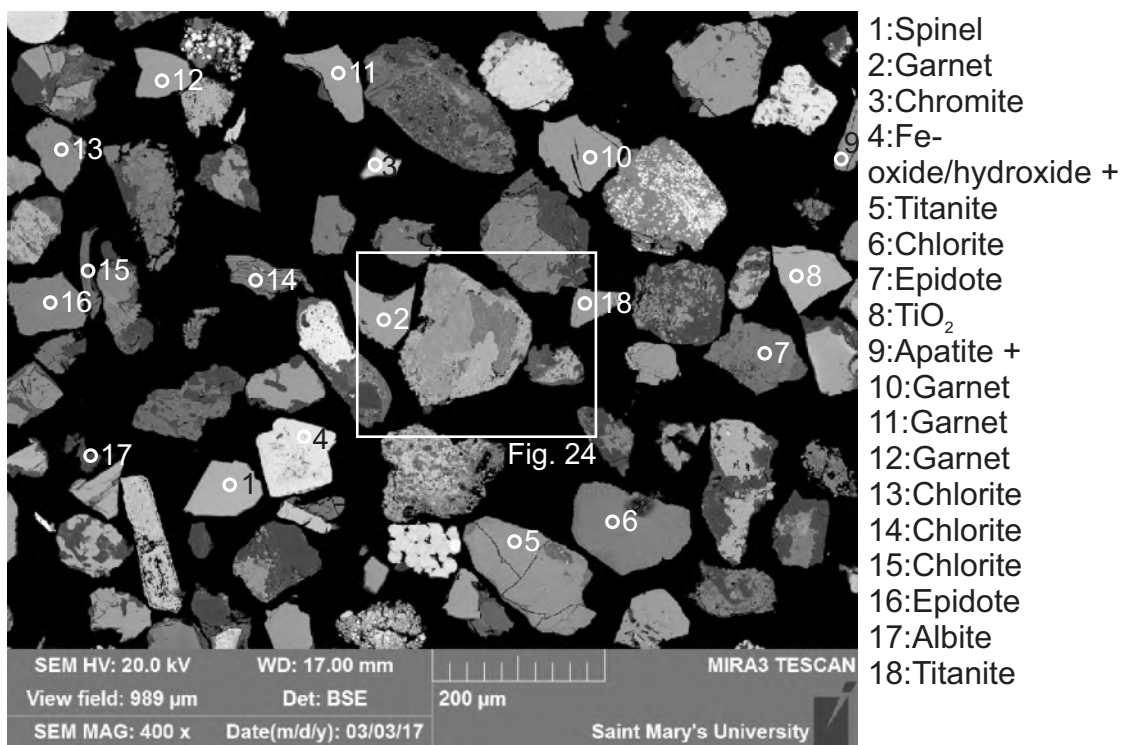

Figure B2.23: Sample S5 site 15 (SEM).

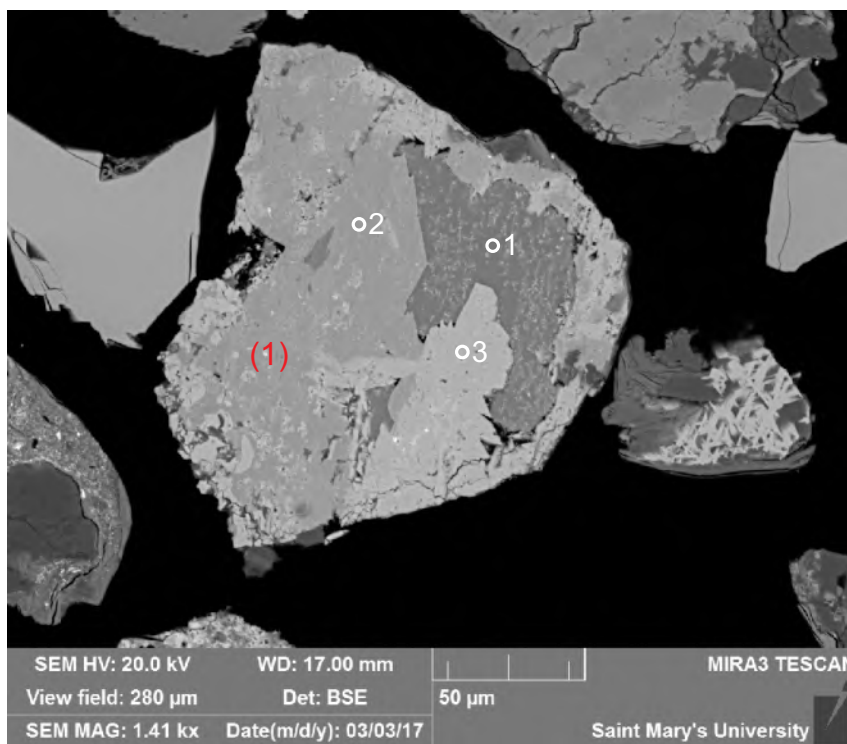

- 1: Fluorite +
- 2: Titanite
- 3: TiO<sub>2</sub>

Figure B2.24: Sample S5 site 15.1 (SEM). 1: Lithic clast consisting of fluorite, titanite, and titania (metamorphic).

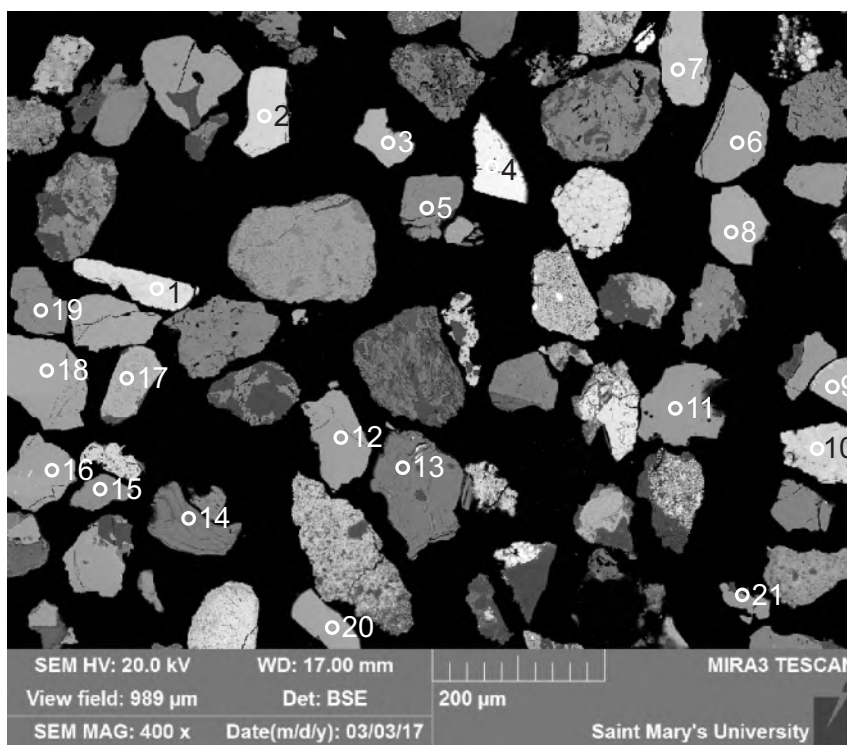

- 1: Fe-oxides/hydroxide +
- 2: Chromite
- 3: TiO<sub>2</sub>
- 4: Fe-oxides/hydroxide +
- 5: Epidote
- 6: Apatite
- 7: TiO<sub>2</sub>
- 8: Spinel
- 9: Spinel
- 10: Fe-oxides/hydroxide +
- 11: Garnet
- 12: Garnet
- 13: Chlorite
- 14: Chlorite
- 15: Chlorite
- 16: Garnet
- 17: TiO<sub>2</sub> +
- 18: Garnet
- 19: Epidote
- 20: Garnet
- 21: Garnet

Figure B2.25: Sample S5 site 16 (SEM).

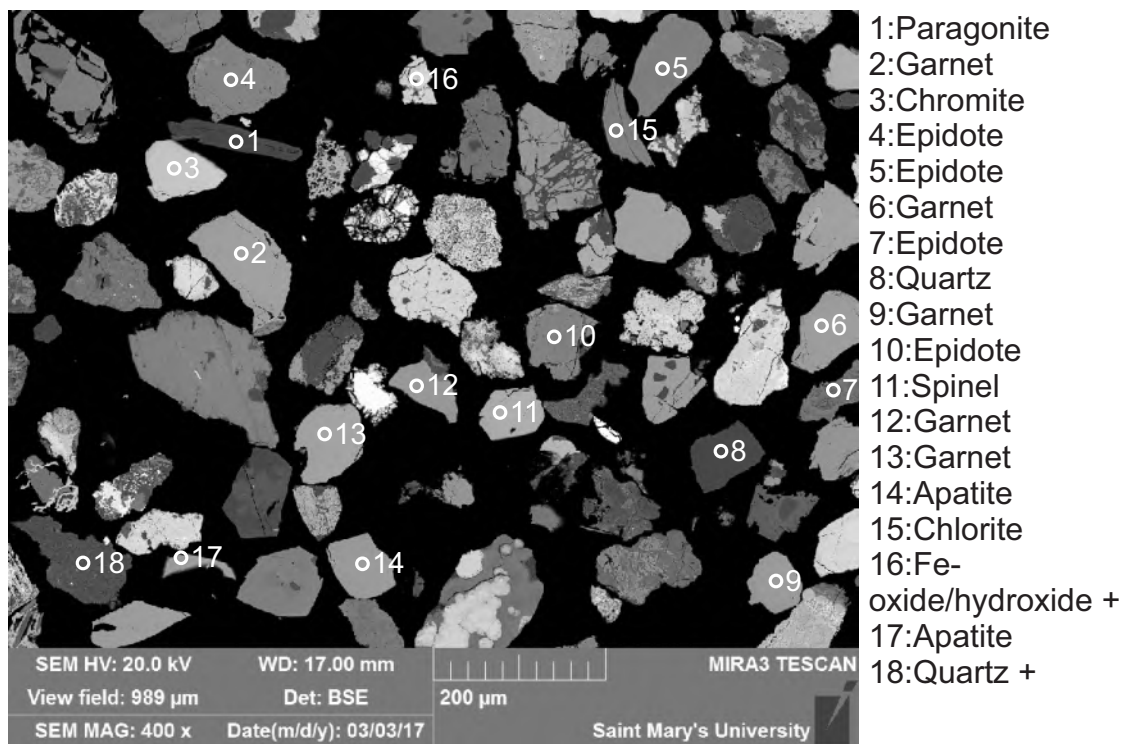

Figure B2.26: Sample S5 site 17 (SEM).

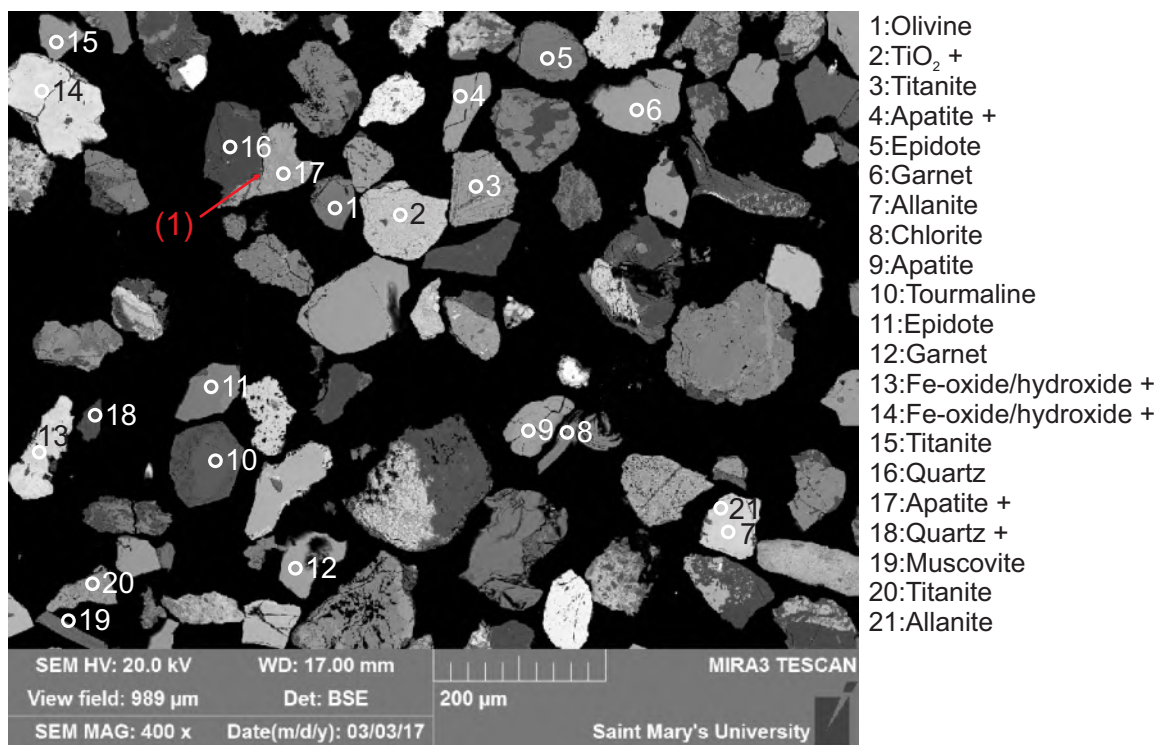

Figure B2.27: Sample S5 site 18 (SEM). 1: Lithic clast (quartz + apatite, igneous).



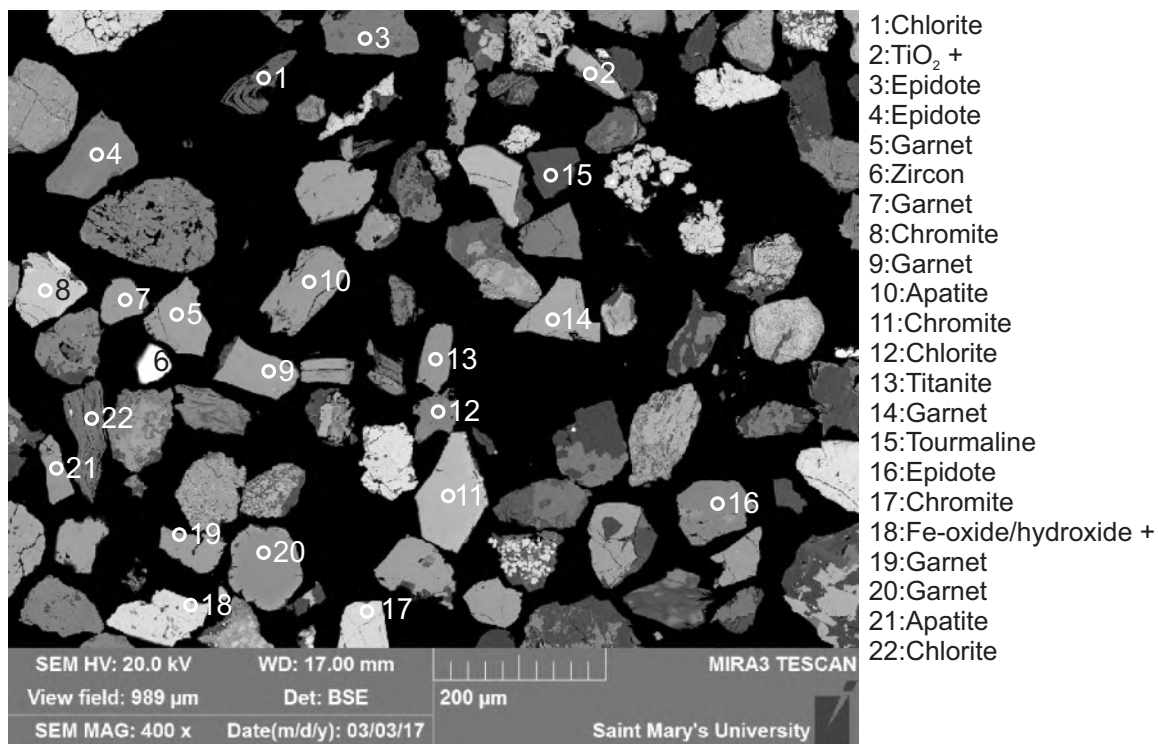

Figure B2.28: Sample S5 site 19 (SEM).

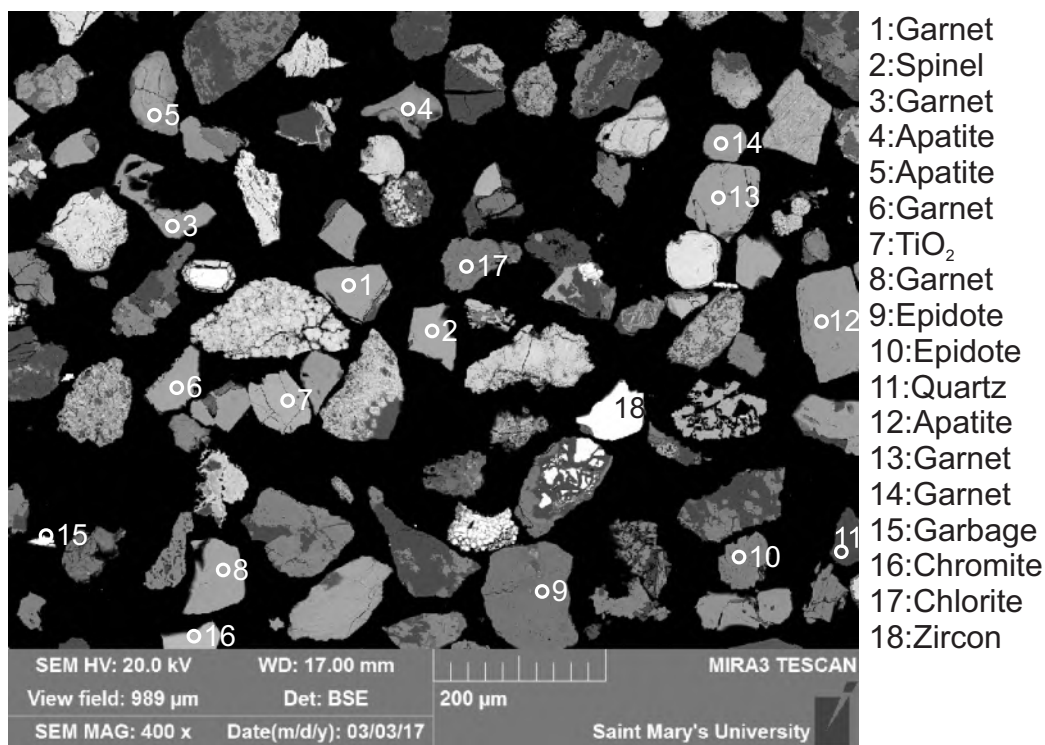

Figure B2.29: Sample S5 site 20 (SEM).

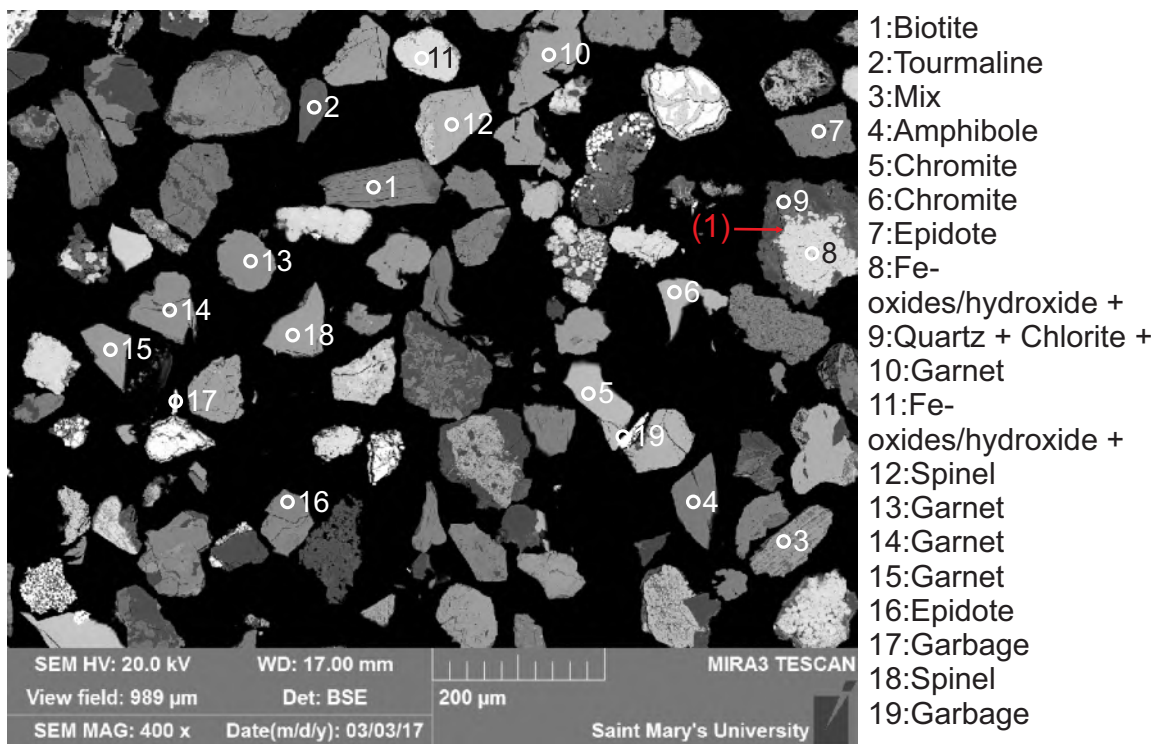

Figure B2.30: Sample S5 site 21 (SEM). 1: Igneous (probably) clast consisting of quartz, fine-grained chlorite, and Fe-oxide/hydroxide.

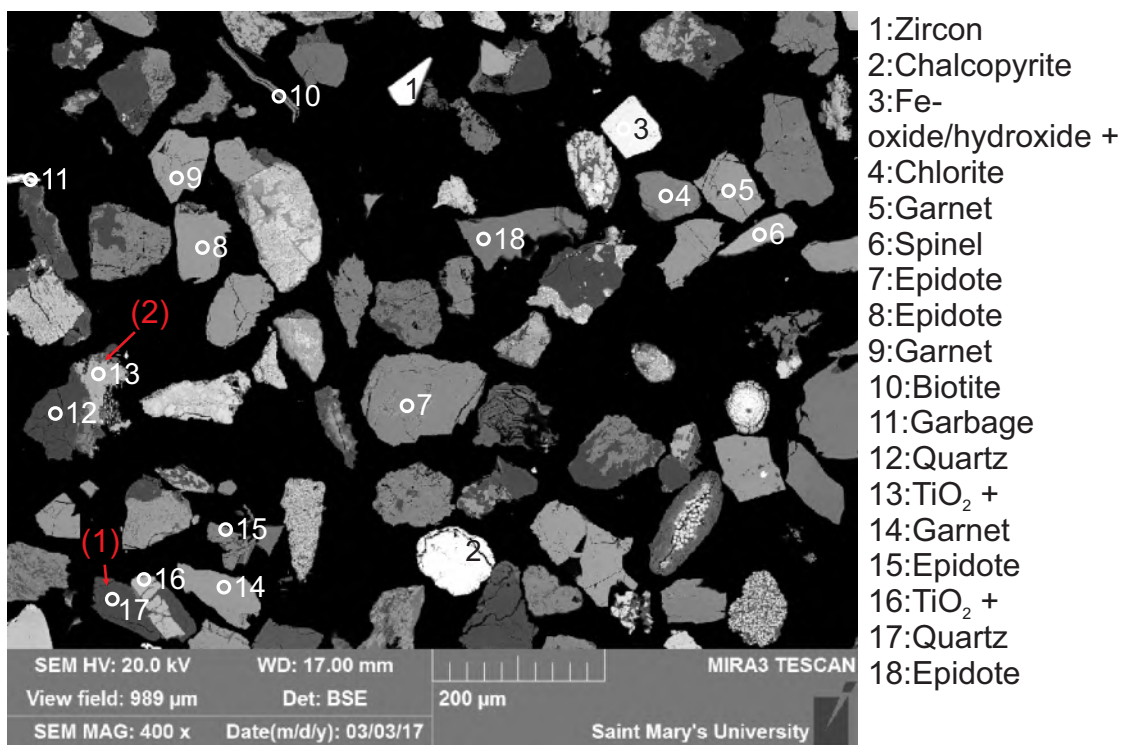

Figure B2.31: Sample S5 site 22 (SEM). 1: Lithic clast (quartz +  $\text{TiO}_2$ , metamorphic). 2: Lithic clast (garnet +  $\text{TiO}_2$ , metamorphic).

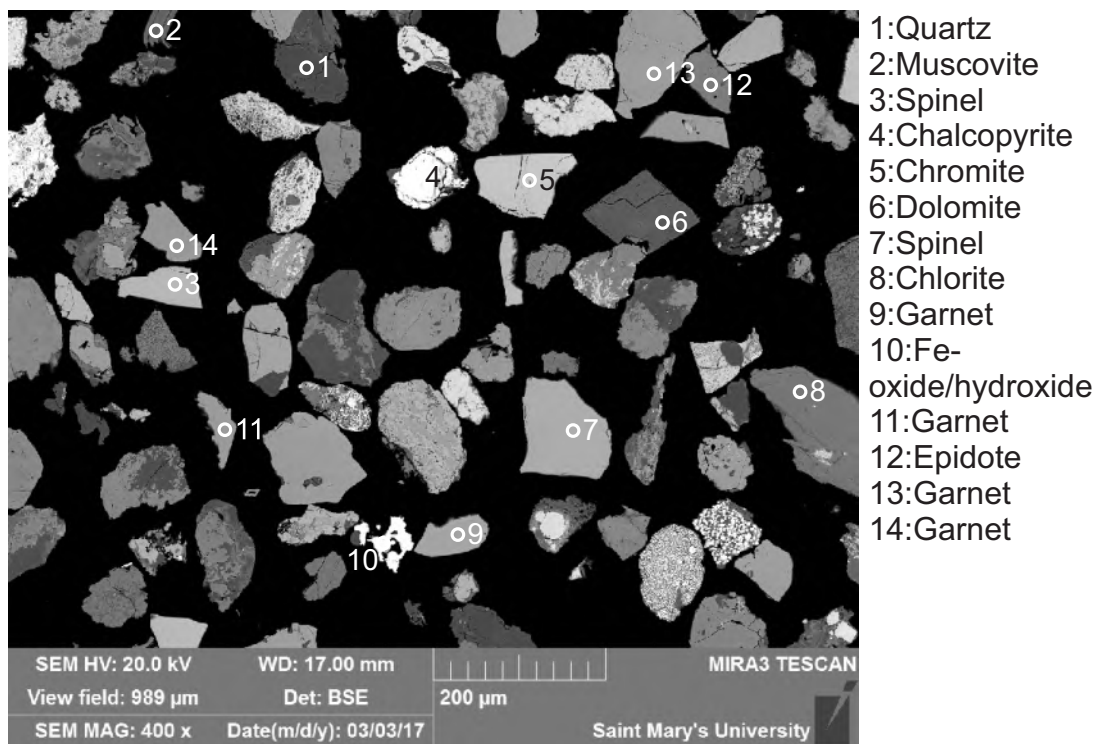

Figure B2.32: Sample S5 site 23 (SEM).

Table B2.1: EDS analyses from sample S5.

| Sample | Site | Position | Mineral   | SiO2   | TiO2  | Al2O3 | FeO   | MnO  | MgO   | CaO   | Na2O  | K2O  | P2O5  | SO3   | F     | Cl | Sc2O3 | V2O5 | Cr2O3 | CoO   | NiO | CuO | ZnO  | SrO  | ZrO2 | BaO   | La2O3 | Ce2O3 | Nd2O3 | HfO2 | WO3   | Total | Actual<br>Total |     |
|--------|------|----------|-----------|--------|-------|-------|-------|------|-------|-------|-------|------|-------|-------|-------|----|-------|------|-------|-------|-----|-----|------|------|------|-------|-------|-------|-------|------|-------|-------|-----------------|-----|
| S5     | 1    | 1        | Brt       |        |       |       |       |      |       |       |       |      |       | 36.56 |       |    |       |      |       | -0.04 |     |     |      | 1.55 |      | 61.93 |       |       |       |      |       |       | 100             | 114 |
| S5     | 1    | 2        | Grt (Alm) | 39.36  |       | 21.00 | 32.79 | 0.80 | 3.70  | 2.34  |       |      |       |       |       |    |       |      |       |       |     |     |      |      |      |       |       |       |       |      |       |       | 100             | 116 |
| S5     | 1    | 3        | Ep        | 40.12  |       | 23.34 | 10.97 |      |       | 22.57 |       |      |       |       |       |    |       |      |       |       |     |     |      |      |      |       |       |       |       |      |       |       | 97              | 109 |
| S5     | 1    | 4        | Ep        | 40.49  |       | 27.74 | 6.07  |      |       | 22.70 |       |      |       |       |       |    |       |      |       |       |     |     |      |      |      |       |       |       |       |      |       |       | 97              | 113 |
| S5     | 1    | 5        | Ep        | 39.50  |       | 24.13 | 10.24 | 0.44 |       | 22.14 |       |      | 0.55  |       |       |    |       |      |       |       |     |     |      |      |      |       |       |       |       |      |       |       | 97              | 112 |
| S5     | 1    | 6        | Grt (Alm) | 38.81  |       | 20.82 | 30.20 | 7.07 |       | 3.09  |       |      |       |       |       |    |       |      |       |       |     |     |      |      |      |       |       |       |       |      |       |       | 100             | 113 |
| S5     | 1    | 7        | Feohy +   | 7.06   | 1.81  | 3.38  | 86.01 |      |       | 0.70  | 0.60  |      |       |       |       |    |       | 0.43 |       |       |     |     |      |      |      |       |       |       |       |      |       |       | 100             | 91  |
| S5     | 1    | 8        | Feohy +   | 3.86   |       |       | 96.14 |      |       |       |       |      |       |       |       |    |       |      |       |       |     |     |      |      |      |       |       |       |       |      |       |       | 100             | 78  |
| S5     | 1    | 9        | Ep        | 40.24  |       | 25.73 | 8.10  | 0.23 |       | 22.70 |       |      |       |       |       |    |       |      |       |       |     |     |      |      |      |       |       |       |       |      |       |       | 97              | 109 |
| S5     | 1    | 10       | Chl       | 26.89  |       | 21.39 | 20.27 |      | 16.45 |       |       |      |       |       |       |    |       |      |       |       |     |     |      |      |      |       |       |       |       |      |       |       | 85              | 96  |
| S5     | 1    | 11       | Spl       |        |       | 28.77 | 15.00 |      | 16.13 |       |       |      |       |       |       |    |       |      | 40.10 |       |     |     |      |      |      |       |       |       |       |      |       |       | 100             | 112 |
| S5     | 1    | 12       | Ep        | 40.30  |       | 23.57 | 10.72 |      | 0.54  | 21.86 |       |      |       |       |       |    |       |      |       |       |     |     |      |      |      |       |       |       |       |      |       |       | 97              | 107 |
| S5     | 1    | 13       | An        | 44.50  |       | 31.56 | 0.62  |      |       | 21.97 | 1.35  |      |       |       |       |    |       |      |       |       |     |     |      |      |      |       |       |       |       |      |       |       | 100             | 109 |
| S5     | 1.1  | 1        | Ab        | 69.48  |       | 18.49 | 0.39  |      |       |       | 11.65 |      |       |       |       |    |       |      |       |       |     |     |      |      |      |       |       |       |       |      |       |       | 100             | 119 |
| S5     | 1.1  | 2        | Chl       | 30.61  |       | 17.91 | 11.19 | 0.34 | 24.57 |       |       |      |       |       |       |    |       |      | 0.38  |       |     |     |      |      |      |       |       |       |       |      |       |       | 85              | 100 |
| S5     | 1.1  | 3        | Ep        | 39.81  |       | 22.08 | 12.99 | 0.73 |       | 21.40 |       |      |       |       |       |    |       |      |       |       |     |     |      |      |      |       |       |       |       |      |       |       | 97              | 108 |
| S5     | 1.1  | 4        | Ab        | 69.26  |       | 18.71 | 0.40  |      |       |       | 11.63 |      |       |       |       |    |       |      |       |       |     |     |      |      |      |       |       |       |       |      |       |       | 100             | 121 |
| S5     | 1.1  | 5        | Feohy +   | 9.64   |       | 4.45  | 84.11 |      |       | 0.52  | 0.77  |      |       |       |       |    |       |      | 0.52  |       |     |     |      |      |      |       |       |       |       |      |       |       | 100             | 79  |
| S5     | 1.1  | 6        | Ttn       | 31.50  | 36.83 | 3.45  | 0.56  |      |       | 26.53 |       |      |       |       | 1.13  |    |       |      |       |       |     |     |      |      |      |       |       |       |       |      |       |       | 100             | 111 |
| S5     | 1.1  | 7        | Ab        | 69.18  |       | 18.64 | 0.49  |      |       | 0.19  | 11.51 |      |       |       |       |    |       |      |       |       |     |     |      |      |      |       |       |       |       |      |       |       | 100             | 118 |
| S5     | 1.1  | 8        | Chl + Ab  | 42.34  | 0.41  | 13.92 | 21.42 |      | 16.99 | 0.60  | 2.10  | 0.55 |       |       |       |    |       |      |       |       |     |     |      |      |      |       |       |       |       |      | 1.68  | 100   | 93              |     |
| S5     | 1.2  | 1        | Qz        | 99.79  |       |       | 0.21  |      |       |       |       |      |       |       |       |    |       |      |       |       |     |     |      |      |      |       |       |       |       |      |       |       | 100             | 121 |
| S5     | 1.2  | 2        | Fl        |        |       |       | 1.57  |      | 0.49  | 69.76 |       |      |       |       | 27.35 |    |       |      |       |       |     |     | 0.82 |      |      |       |       |       |       |      |       |       | 100             | 81  |
| S5     | 1.2  | 3        | Feohy +   | 3.98   |       |       | 87.13 |      |       | 0.69  |       |      |       | 8.20  |       |    |       |      |       |       |     |     |      |      |      |       |       |       |       |      |       |       | 100             | 87  |
| S5     | 1.2  | 4        | Cpx       | 51.61  | 1.50  | 3.41  | 13.05 | 0.37 | 15.13 | 14.52 | 0.42  |      |       |       |       |    |       |      |       |       |     |     |      |      |      |       |       |       |       |      |       |       | 100             | 117 |
| S5     | 1.2  | 5        | lab       | 55.40  |       | 27.51 | 1.14  |      |       | 10.85 | 5.10  |      |       |       |       |    |       |      |       |       |     |     |      |      |      |       |       |       |       |      |       |       | 100             | 119 |
| S5     | 2    | 1        | Chr       |        | 0.97  | 15.07 | 27.72 |      | 9.81  |       |       |      |       |       |       |    |       |      | 46.43 |       |     |     |      |      |      |       |       |       |       |      |       |       | 100             | 107 |
| S5     | 2    | 2        | Amph      | 41.68  |       | 17.10 | 10.86 |      | 13.24 | 13.34 | 0.78  |      |       |       |       |    |       |      |       |       |     |     |      |      |      |       |       |       |       |      |       |       | 97              | 81  |
| S5     | 2    | 3        | Feohy +   | 4.66   |       |       | 93.88 |      |       | 0.56  |       |      |       | 0.90  |       |    |       |      |       |       |     |     |      |      |      |       |       |       |       |      |       |       | 100             | 80  |
| S5     | 2    | 4        | Grt       | 40.84  |       | 21.53 | 21.77 | 0.43 | 5.48  | 9.95  |       |      |       |       |       |    |       |      |       |       |     |     |      |      |      |       |       |       |       |      |       |       | 100             | 113 |
| S5     | 2    | 5        | Qz        | 100.00 |       |       |       |      |       |       |       |      |       |       |       |    |       |      |       |       |     |     |      |      |      |       |       |       |       |      |       |       | 100             | 115 |
| S5     | 2    | 6        | Chr       |        |       | 18.66 | 19.97 |      | 11.61 |       |       |      |       |       |       |    |       | 0.48 | 49.29 |       |     |     |      |      |      |       |       |       |       |      |       |       | 100             | 105 |
| S5     | 2    | 7        | Grt       | 39.55  | 0.30  | 20.67 | 26.36 | 3.13 | 0.91  | 9.08  |       |      |       |       |       |    |       |      |       |       |     |     |      |      |      |       |       |       |       |      |       |       | 100             | 109 |
| S5     | 2    | 8        | Ttn       | 32.93  | 38.16 | 1.15  |       |      |       | 27.75 |       |      |       |       |       |    |       |      |       |       |     |     |      |      |      |       |       |       |       |      |       |       | 100             | 109 |
| S5     | 2    | 9        | Chl       | 30.02  | 0.80  | 19.01 | 25.33 |      | 8.74  | 0.20  | 0.37  | 0.54 |       |       |       |    |       |      |       |       |     |     |      |      |      |       |       |       |       |      |       |       | 85              | 98  |
| S5     | 2    | 10       | Ap +      | 1.48   |       |       | 0.44  |      |       | 45.24 | 0.98  |      | 38.83 | 0.77  | 9.14  |    |       |      |       |       |     |     | 3.89 |      |      |       |       |       |       |      | -0.77 | 100   | 100             |     |
| S5     | 2    | 11       | Ep        | 40.24  |       | 27.10 | 6.65  | 0.23 |       | 22.78 |       |      |       |       |       |    |       |      |       |       |     |     |      |      |      |       |       |       |       |      |       |       | 97              | 110 |
| S5     | 2    | 12       | Grt       | 39.31  |       | 20.92 | 31.69 | 3.28 | 2.99  | 1.82  |       |      |       |       |       |    |       |      |       |       |     |     |      |      |      |       |       |       |       |      |       |       | 100             | 114 |
| S5     | 2    | 13       | Ep        | 40.22  |       | 25.13 | 8.47  |      | 0.33  | 22.85 |       |      |       |       |       |    |       |      |       |       |     |     |      |      |      |       |       |       |       |      |       |       | 97              | 112 |
| S5     | 2    | 14       | Ep        | 40.00  |       | 21.84 | 12.80 |      |       | 22.35 |       |      |       |       |       |    |       |      |       |       |     |     |      |      |      |       |       |       |       |      |       |       | 97              | 109 |
| S5     | 2    | 15       | Chl       | 26.25  |       | 21.20 | 23.54 |      | 13.72 |       | 0.30  |      |       |       |       |    |       |      |       |       |     |     |      |      |      |       |       |       |       |      |       |       | 85              | 97  |
| S5     | 2    | 16       | Grt       | 39.62  |       | 20.86 | 24.16 | 5.00 | 2.19  | 8.17  |       |      |       |       |       |    |       |      |       |       |     |     |      |      |      |       |       |       |       |      |       |       | 100             | 114 |
| S5     | 2.1  | 1        | Qz +      | 89.02  |       | 5.05  | 2.48  |      | 1.21  | 0.41  | 0.29  | 1.54 |       |       |       |    |       |      |       |       |     |     |      |      |      |       |       |       |       |      |       |       | 100             | 110 |
| S5     | 2.1  | 2        | Chl + Ill | 53.37  | 0.50  | 7.99  | 33.81 |      | 1.57  | 0.26  |       | 2.50 |       |       |       |    |       |      |       |       |     |     |      |      |      |       |       |       |       |      |       |       | 100             | 110 |
| S5     | 2.1  | 3        | Feohy +   | 6.75   |       | 1.95  | 88.90 | 0.98 | 0.69  | 0.74  |       |      |       |       |       |    |       |      |       |       |     |     |      |      |      |       |       |       |       |      |       |       | 100             | 82  |
| S5     | 3    | 1        | Ms        | 46.72  | 0.55  | 33.84 | 0.83  |      | 0.96  |       | 1.94  | 8.28 |       |       | 1.88  |    |       |      |       |       |     |     |      |      |      |       |       |       |       |      |       |       | 95              | 108 |
| S5     | 3    | 2        | TiO2      |        | 99.58 |       | 0.42  |      |       |       |       |      |       |       |       |    |       |      |       |       |     |     |      |      |      |       |       |       |       |      |       |       | 100             | 105 |
| S5     | 3    | 3        | Ab        | 68.04  |       | 19.92 | 0.31  |      |       | 0.37  | 10.84 | 0.51 |       |       |       |    |       |      |       |       |     |     |      |      |      |       |       |       |       |      |       |       | 100             | 115 |
| S5     | 3    | 4        | Chr       |        |       | 12.08 | 19.44 |      | 10.88 |       |       |      |       |       |       |    |       |      | 57.60 |       |     |     |      |      |      |       |       |       |       |      |       |       | 100             | 104 |
| S5     | 3    | 5        | TiO2      |        | 99.16 |       | 0.84  |      |       |       |       |      |       |       |       |    |       |      |       |       |     |     |      |      |      |       |       |       |       |      |       |       | 100             | 107 |

Table B2.1: EDS analyses from sample S5.

| Sample | Site | Position | Mineral    | SiO2   | TiO2  | Al2O3 | FeO   | MnO   | MgO   | CaO   | Na2O  | K2O   | P2O5  | SO3 | F    | Cl   | Sc2O3 | V2O5 | Cr2O3 | CoO  | NiO | CuO | ZnO | SrO   | ZrO2 | BaO | La2O3 | Ce2O3 | Nd2O3 | HfO2 | WO3  | Total | Actual Total |     |
|--------|------|----------|------------|--------|-------|-------|-------|-------|-------|-------|-------|-------|-------|-----|------|------|-------|------|-------|------|-----|-----|-----|-------|------|-----|-------|-------|-------|------|------|-------|--------------|-----|
| S5     | 3    | 6        | Ap         |        |       |       |       |       |       | 49.92 |       |       | 45.16 |     | 4.93 |      |       |      |       |      |     |     |     |       |      |     |       |       |       |      |      | 100   | 120          |     |
| S5     | 3    | 7        | Chl        | 25.86  |       | 21.59 | 22.32 |       | 14.94 |       | 0.29  |       |       |     |      |      |       |      |       |      |     |     |     |       |      |     |       |       |       |      |      | 85    | 99           |     |
| S5     | 3    | 8        | Ap         | 0.58   |       |       | 0.44  |       |       | 47.40 | 0.30  |       | 43.18 |     | 5.96 |      |       |      |       |      |     |     |     | 2.14  |      |     |       |       |       |      |      |       | 100          | 122 |
| S5     | 3    | 9        | Chl        | 26.36  |       | 21.82 | 21.94 |       | 14.88 |       |       |       |       |     |      |      |       |      |       |      |     |     |     |       |      |     |       |       |       |      |      |       | 85           | 103 |
| S5     | 3    | 10       | Spl        |        |       | 27.31 | 15.76 |       | 14.92 |       |       |       |       |     |      |      |       |      | 42.00 |      |     |     |     |       |      |     |       |       |       |      |      |       | 100          | 109 |
| S5     | 3    | 11       | Grt        | 39.62  | 0.63  | 20.94 | 26.89 | 0.54  | 2.24  | 9.15  |       |       |       |     |      |      |       |      |       |      |     |     |     |       |      |     |       |       |       |      |      |       | 100          | 114 |
| S5     | 3    | 12       | Grt        | 40.46  |       | 21.08 | 26.81 | 1.05  | 4.70  | 5.89  |       |       |       |     |      |      |       |      |       |      |     |     |     |       |      |     |       |       |       |      |      |       | 100          | 115 |
| S5     | 3    | 13       | Grt        | 39.50  |       | 20.82 | 32.13 | 0.69  | 2.93  | 3.93  |       |       |       |     |      |      |       |      |       |      |     |     |     |       |      |     |       |       |       |      |      |       | 100          | 116 |
| S5     | 3    | 14       | Grt        | 39.60  |       | 21.11 | 28.62 | 0.59  | 1.75  | 8.34  |       |       |       |     |      |      |       |      |       |      |     |     |     |       |      |     |       |       |       |      |      |       | 100          | 114 |
| S5     | 3    | 15       | Pmp        | 39.41  |       | 20.35 | 9.89  | 0.25  | 2.16  | 21.93 |       |       |       |     |      |      |       |      |       |      |     |     |     |       |      |     |       |       |       |      |      |       | 94           | 97  |
| S5     | 3    | 16       | Ep         | 39.40  |       | 26.66 | 6.99  |       |       | 23.95 |       |       |       |     |      |      |       |      |       |      |     |     |     |       |      |     |       |       |       |      |      |       | 97           | 90  |
| S5     | 3.1  | 1        | Ep         | 40.48  |       | 25.21 | 9.01  | 0.27  |       | 22.02 |       |       |       |     |      |      |       |      |       |      |     |     |     |       |      |     |       |       |       |      |      |       | 97           | 111 |
| S5     | 3.1  | 2        | Qz         | 99.70  |       |       | 0.30  |       |       |       |       |       |       |     |      |      |       |      |       |      |     |     |     |       |      |     |       |       |       |      |      |       | 100          | 121 |
| S5     | 3.1  | 3        | Tur +      | 49.58  | 1.23  | 31.28 | 9.37  |       | 5.41  | 0.75  | 0.91  | 1.46  |       |     |      |      |       |      |       |      |     |     |     |       |      |     |       |       |       |      |      |       | 100          | 95  |
| S5     | 3.1  | 4        | Feohy +    | 18.63  | 0.47  | 6.38  | 67.01 | 0.42  | 2.17  | 0.70  |       | 1.00  |       |     |      |      |       |      |       |      |     |     |     |       |      |     |       |       |       |      | 3.23 | 100   | 81           |     |
| S5     | 4    | 1        | Zrn        | 30.96  |       |       |       |       |       |       |       |       |       |     |      |      |       |      |       |      |     |     |     | 67.69 |      |     |       |       | 1.35  |      |      |       | 100          | 119 |
| S5     | 4    | 2        | Ep +       | 47.95  |       | 25.13 |       |       |       | 26.92 |       |       |       |     |      |      |       |      |       |      |     |     |     |       |      |     |       |       |       |      |      |       | 100          | 109 |
| S5     | 4    | 3        | Grt        | 39.20  |       | 20.89 | 33.65 | 0.85  | 1.28  | 4.14  |       |       |       |     |      |      |       |      |       |      |     |     |     |       |      |     |       |       |       |      |      |       | 100          | 113 |
| S5     | 4    | 4        | Qz         | 100.00 |       |       |       |       |       |       |       |       |       |     |      |      |       |      |       |      |     |     |     |       |      |     |       |       |       |      |      |       | 100          | 117 |
| S5     | 4    | 5        | Grt        | 39.66  |       | 20.98 | 29.54 | 0.97  | 1.31  | 7.53  |       |       |       |     |      |      |       |      |       |      |     |     |     |       |      |     |       |       |       |      |      |       | 100          | 110 |
| S5     | 4    | 6        | Chl        | 25.82  |       | 22.16 | 24.41 |       | 12.61 |       |       |       |       |     |      |      |       |      |       |      |     |     |     |       |      |     |       |       |       |      |      |       | 85           | 96  |
| S5     | 4    | 7        | Grt        | 39.65  |       | 21.20 | 31.74 | 0.86  | 4.73  | 1.82  |       |       |       |     |      |      |       |      |       |      |     |     |     |       |      |     |       |       |       |      |      |       | 100          | 114 |
| S5     | 4    | 8        | Grt        | 39.67  |       | 20.60 | 29.76 | 1.81  | 1.37  | 6.78  |       |       |       |     |      |      |       |      |       |      |     |     |     |       |      |     |       |       |       |      |      |       | 100          | 115 |
| S5     | 4    | 9        | Bt +       | 41.22  | 1.82  | 19.99 | 18.07 |       | 13.83 |       |       | 5.07  |       |     |      |      |       |      |       |      |     |     |     |       |      |     |       |       |       |      |      |       | 100          | 109 |
| S5     | 4    | 10       | Ep         | 40.09  |       | 23.39 | 10.94 |       |       | 22.58 |       |       |       |     |      |      |       |      |       |      |     |     |     |       |      |     |       |       |       |      |      |       | 97           | 109 |
| S5     | 4    | 11       | Qz         | 99.78  |       |       | 0.22  |       |       |       |       |       |       |     |      |      |       |      |       |      |     |     |     |       |      |     |       |       |       |      |      |       | 100          | 118 |
| S5     | 4    | 12       | Cpx        | 51.82  | 0.96  | 3.66  | 6.98  | 0.48  | 13.48 | 21.42 | 1.19  |       |       |     |      |      |       |      |       |      |     |     |     |       |      |     |       |       |       |      |      |       | 100          | 120 |
| S5     | 4    | 13       | Feohy +    | 1.70   |       |       | 98.30 |       |       |       |       |       |       |     |      |      |       |      |       |      |     |     |     |       |      |     |       |       |       |      |      |       | 100          | 81  |
| S5     | 4    | 14       | Grt        | 39.12  |       | 20.89 | 36.88 |       | 2.62  | 0.49  |       |       |       |     |      |      |       |      |       |      |     |     |     |       |      |     |       |       |       |      |      |       | 100          | 116 |
| S5     | 4    | 15       | Ep         | 40.75  |       | 25.36 | 8.33  |       |       | 22.56 |       |       |       |     |      |      |       |      |       |      |     |     |     |       |      |     |       |       |       |      |      |       | 97           | 111 |
| S5     | 4    | 16       | mix        | 22.56  |       | 13.78 | 52.61 |       | 1.46  | 0.89  | 0.60  | 1.34  | 1.23  |     |      | 0.24 |       |      |       |      |     |     |     |       |      |     |       |       |       |      | 5.31 | 100   | 91           |     |
| S5     | 4    | 17       | Grt        | 40.61  |       | 21.57 | 24.55 | 2.54  | 7.57  | 3.16  |       |       |       |     |      |      |       |      |       |      |     |     |     |       |      |     |       |       |       |      |      |       | 100          | 120 |
| S5     | 4    | 18       | Ep         | 39.95  |       | 23.62 | 10.91 |       | 0.30  | 22.21 |       |       |       |     |      |      |       |      |       |      |     |     |     |       |      |     |       |       |       |      |      |       | 97           | 111 |
| S5     | 4.1  | 1        | TiO2 +     | 1.49   | 96.11 | 0.33  | 1.20  |       | 0.49  | 0.38  |       |       |       |     |      |      |       |      |       |      |     |     |     |       |      |     |       |       |       |      |      |       | 100          | 108 |
| S5     | 4.1  | 2        | Chl + TiO2 | 23.09  | 35.37 | 10.48 | 16.17 |       | 13.85 | 0.56  | 0.49  |       |       |     |      |      |       |      |       |      |     |     |     |       |      |     |       |       |       |      |      |       | 100          | 101 |
| S5     | 5    | 1        | Grt        | 39.87  |       | 20.93 | 30.25 | 1.57  | 3.68  | 3.71  |       |       |       |     |      |      |       |      |       |      |     |     |     |       |      |     |       |       |       |      |      |       | 100          | 114 |
| S5     | 5    | 2        | Ms         | 47.37  | 0.88  | 33.40 | 1.62  |       | 0.91  |       | 0.77  | 10.04 |       |     |      |      |       |      |       |      |     |     |     |       |      |     |       |       |       |      |      |       | 95           | 111 |
| S5     | 5    | 3        | Grt        | 39.57  |       | 19.29 | 16.28 | 15.94 | 2.66  | 6.26  |       |       |       |     |      |      |       |      |       |      |     |     |     |       |      |     |       |       |       |      |      |       | 100          | 117 |
| S5     | 5    | 4        | Ep         | 39.97  |       | 23.77 | 10.41 | 0.27  |       | 22.58 |       |       |       |     |      |      |       |      |       |      |     |     |     |       |      |     |       |       |       |      |      |       | 97           | 113 |
| S5     | 5    | 5        | Rds+       |        |       | 2.52  | 2.02  | 76.91 | 1.65  | 3.82  | 1.32  | 0.25  |       |     |      |      |       |      |       | 0.59 |     |     |     |       | 8.70 |     |       |       |       | 2.22 |      | 100   | 81           |     |
| S5     | 5    | 6        | Chl        | 26.81  |       | 21.34 | 19.39 |       | 17.46 |       |       |       |       |     |      |      |       |      |       |      |     |     |     |       |      |     |       |       |       |      |      |       | 85           | 99  |
| S5     | 5    | 7        | Chl +      | 33.16  |       | 24.77 | 24.49 | 0.31  | 15.66 |       |       | 1.61  |       |     |      |      |       |      |       |      |     |     |     |       |      |     |       |       |       |      |      |       | 100          | 95  |
| S5     | 5    | 8        | Chl        | 25.18  |       | 20.96 | 27.12 |       | 11.74 |       |       |       |       |     |      |      |       |      |       |      |     |     |     |       |      |     |       |       |       |      |      |       | 85           | 89  |
| S5     | 5    | 9        | Chl        | 24.90  |       | 22.21 | 25.54 |       | 12.35 |       |       |       |       |     |      |      |       |      |       |      |     |     |     |       |      |     |       |       |       |      |      |       | 85           | 96  |
| S5     | 5    | 10       | Grt        | 39.36  |       | 20.76 | 31.56 | 1.22  | 1.60  | 5.50  |       |       |       |     |      |      |       |      |       |      |     |     |     |       |      |     |       |       |       |      |      |       | 100          | 114 |
| S5     | 5    | 11       | Ep         | 40.18  |       | 24.32 | 9.59  |       |       | 22.91 |       |       |       |     |      |      |       |      |       |      |     |     |     |       |      |     |       |       |       |      |      |       | 97           | 107 |
| S5     | 5    | 12       | Ab         | 69.05  |       | 18.74 | 0.47  |       |       | 0.29  | 11.46 |       |       |     |      |      |       |      |       |      |     |     |     |       |      |     |       |       |       |      |      |       | 100          | 118 |
| S5     | 5    | 13       | Ms         | 48.88  | 0.28  | 31.42 | 2.27  |       | 1.53  |       | 0.95  | 9.68  |       |     |      |      |       |      |       |      |     |     |     |       |      |     |       |       |       |      |      |       | 95           | 113 |
| S5     | 5    | 14       | Grt        | 39.89  |       | 21.21 | 27.52 | 0.48  | 2.71  | 8.19  |       |       |       |     |      |      |       |      |       |      |     |     |     |       |      |     |       |       |       |      |      |       | 100          | 113 |
| S5     | 5    | 15       | Chl        | 25.18  |       | 22.52 | 23.49 | 0.37  | 13.14 |       | 0.31  |       |       |     |      |      |       |      |       |      |     |     |     |       |      |     |       |       |       |      |      |       | 85           | 98  |



Table B2.1: EDS analyses from sample S5.

| Sample | Site | Position | Mineral | SiO2   | TiO2  | Al2O3 | FeO   | MnO  | MgO   | CaO   | Na2O | K2O  | P2O5 | SO3   | F     | Cl   | Sc2O3 | V2O5 | Cr2O3 | CoO  | NiO | CuO | ZnO  | SrO | ZrO2  | BaO | La2O3 | Ce2O3 | Nd2O3 | HfO2 | WO3   | Total | Actual<br>Total |     |
|--------|------|----------|---------|--------|-------|-------|-------|------|-------|-------|------|------|------|-------|-------|------|-------|------|-------|------|-----|-----|------|-----|-------|-----|-------|-------|-------|------|-------|-------|-----------------|-----|
| S5     | 5    | 16       | Chr     |        | 0.54  | 20.58 | 29.16 |      | 8.90  |       |      |      |      |       |       |      |       |      | 40.82 |      |     |     |      |     |       |     |       |       |       |      |       | 100   | 106             |     |
| S5     | 5    | 17       | Fl      |        |       |       | 1.19  |      | 0.63  | 63.53 |      |      |      |       | 34.65 |      |       |      |       |      |     |     |      |     |       |     |       |       |       |      |       |       | 100             | 87  |
| S5     | 5    | 18       | Feohy + | 11.05  |       |       | 85.99 |      |       | 1.13  | 0.74 |      |      | 0.83  |       | 0.26 |       |      |       |      |     |     |      |     |       |     |       |       |       |      |       |       | 100             | 84  |
| S5     | 5    | 19       | Ep      | 40.27  |       | 24.44 | 10.53 |      |       | 21.75 |      |      |      |       |       |      |       |      |       |      |     |     |      |     |       |     |       |       |       |      |       |       | 97              | 113 |
| S5     | 5    | 20       | Feohy + | 3.38   | 3.01  | 1.60  | 84.37 |      |       | 0.58  | 0.52 |      |      |       |       |      |       |      |       |      |     |     |      |     |       |     |       |       |       |      | 6.55  |       | 100             | 94  |
| S5     | 5    | 21       | Ep      | 38.99  | 5.18  | 22.04 | 10.31 |      |       | 20.22 |      | 0.25 |      |       |       |      |       |      |       |      |     |     |      |     |       |     |       |       |       |      |       |       | 97              | 109 |
| S5     | 5.1  | 1        | Qz      | 99.40  |       | 0.35  | 0.25  |      |       |       |      |      |      |       |       |      |       |      |       |      |     |     |      |     |       |     |       |       |       |      |       |       | 100             | 121 |
| S5     | 5.1  | 2        | Ep      | 40.51  |       | 24.56 | 9.57  |      |       | 22.36 |      |      |      |       |       |      |       |      |       |      |     |     |      |     |       |     |       |       |       |      |       |       | 97              | 111 |
| S5     | 5.1  | 3        | Feohy + | 2.82   |       | 1.57  | 94.03 |      |       | 0.45  |      |      | 1.12 |       |       |      |       |      |       |      |     |     |      |     |       |     |       |       |       |      |       |       | 100             | 84  |
| S5     | 5.1  | 4        | Qz + Ms | 80.42  |       | 10.92 | 1.78  |      | 1.50  |       | 0.34 | 4.24 |      | 0.80  |       |      |       |      |       |      |     |     |      |     |       |     |       |       |       |      |       |       | 100             | 106 |
| S5     | 5.1  | 5        | Py      | 0.26   |       |       | 28.68 |      |       |       |      |      |      | 71.06 |       |      |       |      |       |      |     |     |      |     |       |     |       |       |       |      |       |       | 100             | 230 |
| S5     | 6    | 1        | Chl     | 26.14  |       | 21.19 | 22.63 | 0.23 | 14.82 |       |      |      |      |       |       |      |       |      |       |      |     |     |      |     |       |     |       |       |       |      |       |       | 85              | 96  |
| S5     | 6    | 2        | Grt     | 39.46  |       | 20.99 | 32.87 | 1.10 | 3.31  | 2.28  |      |      |      |       |       |      |       |      |       |      |     |     |      |     |       |     |       |       |       |      |       |       | 100             | 110 |
| S5     | 6    | 3        | Ep      | 39.87  |       | 22.29 | 12.38 | 0.26 |       | 22.20 |      |      |      |       |       |      |       |      |       |      |     |     |      |     |       |     |       |       |       |      |       |       | 97              | 105 |
| S5     | 6    | 4        | Chr     |        |       | 17.32 | 18.44 |      | 12.27 |       |      |      |      |       |       |      |       | 0.42 | 51.55 |      |     |     |      |     |       |     |       |       |       |      |       |       | 100             | 109 |
| S5     | 6    | 5        | Grt     | 39.49  |       | 20.70 | 31.57 | 0.83 | 1.16  | 6.26  |      |      |      |       |       |      |       |      |       |      |     |     |      |     |       |     |       |       |       |      |       |       | 100             | 113 |
| S5     | 6    | 6        | Grt     | 39.87  |       | 21.14 | 28.09 | 2.84 | 4.94  | 3.12  |      |      |      |       |       |      |       |      |       |      |     |     |      |     |       |     |       |       |       |      |       |       | 100             | 115 |
| S5     | 6    | 7        | Chr     |        |       | 16.81 | 17.55 |      | 11.75 |       |      |      |      |       |       |      |       | 0.34 | 53.55 |      |     |     |      |     |       |     |       |       |       |      |       |       | 100             | 109 |
| S5     | 6    | 8        | Spl     |        |       | 32.70 | 16.01 |      | 15.76 |       |      |      |      |       |       |      |       |      | 35.53 |      |     |     |      |     |       |     |       |       |       |      |       |       | 100             | 110 |
| S5     | 6    | 9        | Grt     | 39.57  |       | 20.94 | 31.01 | 3.10 | 3.53  | 1.85  |      |      |      |       |       |      |       |      |       |      |     |     |      |     |       |     |       |       |       |      |       |       | 100             | 112 |
| S5     | 6    | 10       | Grt     | 40.08  |       | 21.37 | 27.68 | 0.71 | 4.74  | 5.42  |      |      |      |       |       |      |       |      |       |      |     |     |      |     |       |     |       |       |       |      |       |       | 100             | 112 |
| S5     | 6    | 11       | Chl     | 26.34  |       | 21.66 | 22.87 | 0.26 | 13.88 |       |      |      |      |       |       |      |       |      |       |      |     |     |      |     |       |     |       |       |       |      |       |       | 85              | 100 |
| S5     | 6    | 12       | Grt     | 39.32  |       | 21.12 | 30.37 | 3.94 | 3.07  | 2.19  |      |      |      |       |       |      |       |      |       |      |     |     |      |     |       |     |       |       |       |      |       |       | 100             | 116 |
| S5     | 6    | 13       | Ep      | 40.05  |       | 25.14 | 9.03  |      | 0.49  | 22.28 |      |      |      |       |       |      |       |      |       |      |     |     |      |     |       |     |       |       |       |      |       |       | 97              | 110 |
| S5     | 6    | 14       | Chl     | 26.35  |       | 20.95 | 22.09 |      | 15.61 |       |      |      |      |       |       |      |       |      |       |      |     |     |      |     |       |     |       |       |       |      |       |       | 85              | 100 |
| S5     | 6    | 15       | Grt     | 39.69  |       | 21.04 | 34.29 |      | 3.89  | 1.09  |      |      |      |       |       |      |       |      |       |      |     |     |      |     |       |     |       |       |       |      |       |       | 100             | 117 |
| S5     | 6    | 16       | Grt     | 39.55  | 1.52  | 21.04 | 25.41 | 0.64 | 6.01  | 5.84  |      |      |      |       |       |      |       |      |       |      |     |     |      |     |       |     |       |       |       |      |       |       | 100             | 118 |
| S5     | 6    | 17       | Pg      | 48.46  |       | 37.34 | 1.09  |      |       |       | 7.10 | 1.02 |      |       |       |      |       |      |       |      |     |     |      |     |       |     |       |       |       |      |       |       | 95              | 109 |
| S5     | 6    | 18       | Qz      | 100.00 |       |       |       |      |       |       |      |      |      |       |       |      |       |      |       |      |     |     |      |     |       |     |       |       |       |      |       |       | 100             | 120 |
| S5     | 6    | 19       | Chl     | 27.01  |       | 21.33 | 29.69 |      | 6.97  |       |      |      |      |       |       |      |       |      |       |      |     |     |      |     |       |     |       |       |       |      |       |       | 85              | 100 |
| S5     | 6    | 20       | Feohy + | 1.47   |       |       | 96.49 | 0.84 | 1.20  |       |      |      |      |       |       |      |       |      |       |      |     |     |      |     |       |     |       |       |       |      |       |       | 100             | 95  |
| S5     | 7    | 1        | Grt     | 39.38  |       | 21.03 | 31.09 | 0.92 | 1.98  | 5.59  |      |      |      |       |       |      |       |      |       |      |     |     |      |     |       |     |       |       |       |      |       |       | 100             | 115 |
| S5     | 7    | 2        | Feohy+  | 4.30   | 0.70  | 1.38  | 90.04 |      |       | 0.60  |      |      |      |       |       |      |       |      |       |      |     |     |      |     |       |     |       |       |       |      | 2.98  |       | 100             | 86  |
| S5     | 7    | 3        | TiO2    |        | 97.89 |       | 0.38  |      |       |       |      |      |      |       |       |      |       | 1.73 |       |      |     |     |      |     |       |     |       |       |       |      |       |       | 100             | 107 |
| S5     | 7    | 4        | Brt     |        |       |       |       |      |       |       |      |      |      | 36.71 |       |      |       |      | -0.09 |      |     |     | 1.10 |     | 62.29 |     |       |       |       |      |       |       | 100             | 113 |
| S5     | 7    | 5        | Grt     | 39.22  |       | 20.77 | 32.77 | 0.89 | 2.01  | 4.34  |      |      |      |       |       |      |       |      |       |      |     |     |      |     |       |     |       |       |       |      |       |       | 100             | 115 |
| S5     | 7    | 6        | Ep      | 39.96  |       | 22.56 | 11.69 | 0.27 |       | 22.51 |      |      |      |       |       |      |       |      |       |      |     |     |      |     |       |     |       |       |       |      |       |       | 97              | 110 |
| S5     | 7    | 7        | Feohy + | 2.41   |       |       | 84.51 |      |       | 0.89  | 0.61 |      |      |       |       |      |       |      |       |      |     |     |      |     |       |     |       |       |       |      | 11.58 |       | 100             | 77  |
| S5     | 7    | 8        | Feohy + | 4.16   |       |       | 92.69 |      |       | 0.70  |      |      | 1.64 |       |       |      |       |      |       | 0.81 |     |     |      |     |       |     |       |       |       |      |       |       | 100             | 80  |
| S5     | 7    | 9        | Grt     | 39.51  |       | 20.88 | 34.06 | 1.08 | 3.43  | 1.05  |      |      |      |       |       |      |       |      |       |      |     |     |      |     |       |     |       |       |       |      |       |       | 100             | 111 |
| S5     | 7    | 10       | Grt     | 38.22  | 0.46  | 9.76  | 39.57 | 0.34 | 3.64  | 5.90  |      | 0.70 |      | 0.73  |       |      |       |      | 0.69  |      |     |     |      |     |       |     |       |       |       |      |       |       | 100             | 110 |
| S5     | 7    | 11       | Chl     | 26.50  | 1.90  | 20.17 | 21.43 | 1.11 | 13.90 |       |      |      |      |       |       |      |       |      |       |      |     |     |      |     |       |     |       |       |       |      |       |       | 85              | 96  |
| S5     | 7    | 12       | Qz +    | 94.13  |       | 0.82  | 4.62  |      |       | 0.43  |      |      |      |       |       |      |       |      |       |      |     |     |      |     |       |     |       |       |       |      |       |       | 100             | 108 |
| S5     | 7    | 13       | Grt     | 39.49  |       | 20.84 | 28.69 | 4.22 | 3.35  | 3.41  |      |      |      |       |       |      |       |      |       |      |     |     |      |     |       |     |       |       |       |      |       |       | 100             | 115 |
| S5     | 7    | 14       | Ep      | 39.83  |       | 20.97 | 13.89 |      |       | 22.30 |      |      |      |       |       |      |       |      |       |      |     |     |      |     |       |     |       |       |       |      |       |       | 97              | 109 |
| S5     | 7    | 15       | Chl     | 25.75  |       | 22.07 | 23.25 |      | 13.93 |       |      |      |      |       |       |      |       |      |       |      |     |     |      |     |       |     |       |       |       |      |       |       | 85              | 96  |
| S5     | 7    | 16       | Chl     | 26.34  |       | 20.87 | 23.21 |      | 14.26 |       | 0.32 |      |      |       |       |      |       |      |       |      |     |     |      |     |       |     |       |       |       |      |       |       | 85              | 95  |
| S5     | 7    | 17       | Grt     | 39.38  |       | 21.13 | 30.90 | 1.56 | 3.01  | 4.02  |      |      |      |       |       |      |       |      |       |      |     |     |      |     |       |     |       |       |       |      |       |       | 100             | 113 |
| S5     | 7    | 18       | Qz +    | 89.99  |       | 3.26  | 4.43  |      | 2.32  |       |      |      |      |       |       |      |       |      |       |      |     |     |      |     |       |     |       |       |       |      |       |       | 100             | 112 |
| S5     | 7    | 19       | Ttn     | 32.86  | 37.02 | 1.55  | 2.08  |      |       | 26.50 |      |      |      |       |       |      |       |      |       |      |     |     |      |     |       |     |       |       |       |      |       |       | 100             | 107 |

Table B2.1: EDS analyses from sample S5.

| Sample | Site | Position | Mineral     | SiO2   | TiO2   | Al2O3 | FeO   | MnO   | MgO   | CaO   | Na2O | K2O  | P2O5  | SO3   | F    | Cl | Sc2O3 | V2O5 | Cr2O3 | CoO | NiO | CuO | ZnO | SrO | ZrO2  | BaO | La2O3 | Ce2O3 | Nd2O3 | HfO2 | WO3   | Total | Actual Total |
|--------|------|----------|-------------|--------|--------|-------|-------|-------|-------|-------|------|------|-------|-------|------|----|-------|------|-------|-----|-----|-----|-----|-----|-------|-----|-------|-------|-------|------|-------|-------|--------------|
| S5     | 7    | 20       | Ap          |        |        |       | 0.24  |       |       | 48.69 |      |      | 44.07 |       | 5.56 |    |       |      |       |     |     |     |     |     |       |     |       |       |       |      | 1.45  | 100   | 114          |
| S5     | 7.1  | 1        | Ms          | 49.73  | 0.48   | 29.60 | 2.76  |       | 2.05  |       | 1.00 | 9.38 |       |       |      |    |       |      |       |     |     |     |     |     |       |     |       |       |       |      |       | 95    | 111          |
| S5     | 7.1  | 2        | Qz          | 99.24  |        | 0.36  | 0.41  |       |       |       |      |      |       |       |      |    |       |      |       |     |     |     |     |     |       |     |       |       |       |      |       | 100   | 121          |
| S5     | 7.1  | 3        | Grt         | 35.90  |        | 19.31 | 26.85 |       | 16.02 | 0.88  | 0.51 |      |       | 0.55  |      |    |       |      |       |     |     |     |     |     |       |     |       |       |       |      |       | 100   | 100          |
| S5     | 7.1  | 4        | Grt         | 39.96  |        | 21.24 | 28.39 | 1.54  | 2.48  | 6.39  |      |      |       |       |      |    |       |      |       |     |     |     |     |     |       |     |       |       |       |      |       | 100   | 113          |
| S5     | 7.1  | 5        | Py          | 0.30   |        |       | 28.87 |       |       |       |      |      |       | 70.83 |      |    |       |      |       |     |     |     |     |     |       |     |       |       |       |      |       | 100   | 225          |
| S5     | 7.1  | 6        | Ms          | 47.52  | 0.51   | 32.67 | 2.61  |       | 1.52  |       | 0.97 | 9.20 |       |       |      |    |       |      |       |     |     |     |     |     |       |     |       |       |       |      |       | 95    | 107          |
| S5     | 8    | 1        | Grt         | 39.88  |        | 21.26 | 30.93 | 1.78  | 5.12  | 1.03  |      |      |       |       |      |    |       |      |       |     |     |     |     |     |       |     |       |       |       |      |       | 100   | 112          |
| S5     | 8    | 2        | Garbage     |        |        |       | 0.46  |       |       | 3.34  | 3.53 |      |       |       |      |    |       |      |       |     |     |     |     |     |       |     |       |       |       |      | 92.66 | 100   | 108          |
| S5     | 8    | 3        | "Ilm"       | 1.68   | 60.41  |       | 36.68 |       | 1.24  |       |      |      |       |       |      |    |       |      |       |     |     |     |     |     |       |     |       |       |       |      |       | 100   | 102          |
| S5     | 8    | 4        | TiO2        |        | 100.00 |       |       |       |       |       |      |      |       |       |      |    |       |      |       |     |     |     |     |     |       |     |       |       |       |      |       | 100   | 106          |
| S5     | 8    | 5        | Ep          | 39.90  |        | 22.75 | 11.44 |       | 1.53  | 21.39 |      |      |       |       |      |    |       |      |       |     |     |     |     |     |       |     |       |       |       |      |       | 97    | 106          |
| S5     | 8    | 6        | Ep          | 39.71  |        | 21.77 | 13.07 |       |       | 22.44 |      |      |       |       |      |    |       |      |       |     |     |     |     |     |       |     |       |       |       |      |       | 97    | 105          |
| S5     | 8    | 7        | Chl + Ill + | 46.60  |        | 21.70 | 8.63  |       | 4.14  | 16.55 |      | 2.38 |       |       |      |    |       |      |       |     |     |     |     |     |       |     |       |       |       |      |       | 100   | 101          |
| S5     | 8    | 8        | Qz          | 100.00 |        |       |       |       |       |       |      |      |       |       |      |    |       |      |       |     |     |     |     |     |       |     |       |       |       |      |       | 100   | 115          |
| S5     | 8    | 9        | TiO2        |        | 99.23  |       | 0.77  |       |       |       |      |      |       |       |      |    |       |      |       |     |     |     |     |     |       |     |       |       |       |      |       | 100   | 105          |
| S5     | 8    | 10       | Chl         | 28.00  |        | 17.60 | 22.75 | 0.28  | 16.11 | 0.25  |      |      |       |       |      |    |       |      |       |     |     |     |     |     |       |     |       |       |       |      |       | 85    | 98           |
| S5     | 8    | 11       | Ttn         | 33.48  | 35.13  | 2.05  | 1.63  |       |       | 27.71 |      |      |       |       |      |    |       |      |       |     |     |     |     |     |       |     |       |       |       |      |       | 100   | 110          |
| S5     | 8    | 12       | Spl         |        |        | 34.20 | 15.93 |       | 15.88 |       |      |      |       |       |      |    |       |      | 33.99 |     |     |     |     |     |       |     |       |       |       |      |       | 100   | 109          |
| S5     | 8    | 13       | Grt         | 39.82  |        | 21.00 | 29.90 | 0.84  | 3.07  | 5.37  |      |      |       |       |      |    |       |      |       |     |     |     |     |     |       |     |       |       |       |      |       | 100   | 114          |
| S5     | 8    | 14       | Tur         | 42.78  | 0.47   | 25.69 | 7.54  |       | 7.68  |       | 2.84 |      |       |       |      |    |       |      |       |     |     |     |     |     |       |     |       |       |       |      |       | 87    | 102          |
| S5     | 8    | 15       | Qz          | 100.00 |        |       |       |       |       |       |      |      |       |       |      |    |       |      |       |     |     |     |     |     |       |     |       |       |       |      |       | 100   | 120          |
| S5     | 8    | 16       | Chl         | 27.48  |        | 21.58 | 21.50 |       | 14.06 |       | 0.38 |      |       |       |      |    |       |      |       |     |     |     |     |     |       |     |       |       |       |      |       | 85    | 102          |
| S5     | 8    | 17       | Chl         | 27.98  |        | 16.89 | 26.70 | 0.31  | 12.45 | 0.24  | 0.43 |      |       |       |      |    |       |      |       |     |     |     |     |     |       |     |       |       |       |      |       | 85    | 99           |
| S5     | 9    | 1        | Brt         |        |        |       |       |       |       |       |      |      |       | 36.71 |      |    |       |      | 0.01  |     |     |     |     |     | 63.28 |     |       |       |       |      |       | 100   | 114          |
| S5     | 9    | 2        | Chl         | 26.38  |        | 21.57 | 21.61 |       | 15.43 |       |      |      |       |       |      |    |       |      |       |     |     |     |     |     |       |     |       |       |       |      |       | 85    | 97           |
| S5     | 9    | 3        | Ap          |        |        |       |       |       | 49.38 |       |      |      | 44.76 |       | 5.86 |    |       |      |       |     |     |     |     |     |       |     |       |       |       |      |       | 100   | 118          |
| S5     | 9    | 4        | Spl         |        |        | 34.17 | 15.02 |       | 15.64 |       |      |      |       |       |      |    |       |      | 35.17 |     |     |     |     |     |       |     |       |       |       |      |       | 100   | 107          |
| S5     | 9    | 5        | Chr         |        |        | 9.21  | 18.22 |       | 10.75 |       |      |      |       |       |      |    |       |      | 61.82 |     |     |     |     |     |       |     |       |       |       |      |       | 100   | 104          |
| S5     | 9    | 6        | Tur +       | 58.60  | 0.59   | 25.64 | 5.65  |       | 6.65  | 0.76  | 2.13 |      |       |       |      |    |       |      |       |     |     |     |     |     |       |     |       |       |       |      |       | 100   | 102          |
| S5     | 9    | 7        | TiO2        |        | 99.62  |       | 0.38  |       |       |       |      |      |       |       |      |    |       |      |       |     |     |     |     |     |       |     |       |       |       |      |       | 100   | 102          |
| S5     | 9    | 8        | Qz          | 99.50  |        | 0.50  |       |       |       |       |      |      |       |       |      |    |       |      |       |     |     |     |     |     |       |     |       |       |       |      |       | 100   | 120          |
| S5     | 9    | 9        | Chl         | 26.72  |        | 20.92 | 21.62 |       | 15.73 |       |      |      |       |       |      |    |       |      |       |     |     |     |     |     |       |     |       |       |       |      |       | 85    | 99           |
| S5     | 9    | 10       | Chl         | 25.54  |        | 22.40 | 23.17 |       | 13.89 |       |      |      |       |       |      |    |       |      |       |     |     |     |     |     |       |     |       |       |       |      |       | 85    | 98           |
| S5     | 9    | 11       | Ep          | 40.08  |        | 26.15 | 7.44  |       |       | 23.32 |      |      |       |       |      |    |       |      |       |     |     |     |     |     |       |     |       |       |       |      |       | 97    | 100          |
| S5     | 9    | 12       | Chr         |        |        | 18.71 | 31.62 |       | 7.20  |       |      |      |       |       |      |    |       |      | 42.48 |     |     |     |     |     |       |     |       |       |       |      |       | 100   | 104          |
| S5     | 9    | 13       | Ep          | 42.42  | 0.38   | 23.72 | 5.16  | 0.27  | 3.31  | 20.98 |      | 0.76 |       |       |      |    |       |      |       |     |     |     |     |     |       |     |       |       |       |      |       | 97    | 107          |
| S5     | 9    | 14       | Ep          | 40.03  |        | 25.71 | 8.42  | 0.23  |       | 22.60 |      |      |       |       |      |    |       |      |       |     |     |     |     |     |       |     |       |       |       |      |       | 97    | 109          |
| S5     | 9    | 15       | Chr         |        |        | 20.22 | 20.43 |       | 12.38 |       |      |      |       |       |      |    |       |      | 46.97 |     |     |     |     |     |       |     |       |       |       |      |       | 100   | 93           |
| S5     | 10   | 1        | Chl         | 25.25  |        | 21.05 | 26.58 | 0.24  | 11.55 |       | 0.33 |      |       |       |      |    |       |      |       |     |     |     |     |     |       |     |       |       |       |      |       | 85    | 100          |
| S5     | 10   | 2        | Ep          | 39.87  |        | 23.43 | 11.09 |       | 0.52  | 22.09 |      |      |       |       |      |    |       |      |       |     |     |     |     |     |       |     |       |       |       |      |       | 97    | 107          |
| S5     | 10   | 3        | Qz          | 99.75  |        |       | 0.25  |       |       |       |      |      |       |       |      |    |       |      |       |     |     |     |     |     |       |     |       |       |       |      |       | 100   | 118          |
| S5     | 10   | 4        | Grt         | 40.05  |        | 20.91 | 25.86 | 2.07  | 1.60  | 9.50  |      |      |       |       |      |    |       |      |       |     |     |     |     |     |       |     |       |       |       |      |       | 100   | 110          |
| S5     | 10   | 5        | Grt         | 39.17  | 0.31   | 19.65 | 17.03 | 20.24 | 2.48  | 1.13  |      |      |       |       |      |    |       |      |       |     |     |     |     |     |       |     |       |       |       |      |       | 100   | 112          |
| S5     | 10   | 6        | Grt         | 39.70  |        | 20.93 | 30.58 | 2.21  | 4.51  | 2.07  |      |      |       |       |      |    |       |      |       |     |     |     |     |     |       |     |       |       |       |      |       | 100   | 113          |
| S5     | 10   | 7        | Chr         |        |        | 22.32 | 20.19 |       | 11.60 |       |      |      |       |       |      |    |       |      | 45.89 |     |     |     |     |     |       |     |       |       |       |      |       | 100   | 110          |
| S5     | 10   | 8        | Grt         | 39.88  |        | 20.78 | 28.50 | 2.51  | 3.71  | 4.63  |      |      |       |       |      |    |       |      |       |     |     |     |     |     |       |     |       |       |       |      |       | 100   | 116          |
| S5     | 10   | 9        | Zrn         | 31.25  |        |       |       |       |       |       |      |      |       |       |      |    |       |      |       |     |     |     |     |     | 68.75 |     |       |       |       |      |       | 100   | 120          |
| S5     | 10   | 10       | Chl         | 27.04  |        | 21.16 | 21.16 |       | 15.37 |       |      |      |       |       |      |    |       |      | 0.27  |     |     |     |     |     |       |     |       |       |       |      |       | 85    | 100          |
| S5     | 10   | 11       | Spl         |        |        | 41.30 | 14.50 |       | 17.67 |       |      |      |       |       |      |    |       |      | 26.52 |     |     |     |     |     |       |     |       |       |       |      |       | 100   | 111          |

Table B2.1: EDS analyses from sample S5.

| Sample | Site | Position | Mineral | SiO2  | TiO2  | Al2O3 | FeO   | MnO  | MgO   | CaO   | Na2O | K2O  | P2O5  | SO3  | F     | Cl | Sc2O3 | V2O5 | Cr2O3 | CoO | NiO | CuO | ZnO | SrO   | ZrO2 | BaO | La2O3 | Ce2O3 | Nd2O3 | HfO2 | WO3  | Total | Actual<br>Total |
|--------|------|----------|---------|-------|-------|-------|-------|------|-------|-------|------|------|-------|------|-------|----|-------|------|-------|-----|-----|-----|-----|-------|------|-----|-------|-------|-------|------|------|-------|-----------------|
| S5     | 10   | 12       | Grt     | 39.46 |       | 21.09 | 32.82 | 0.47 | 4.22  | 1.94  |      |      |       |      |       |    |       |      |       |     |     |     |     |       |      |     |       |       |       |      | 100  | 115   |                 |
| S5     | 10   | 13       | Fl      |       |       |       | 0.43  |      |       | 58.47 |      |      |       |      | 41.11 |    |       |      |       |     |     |     |     |       |      |     |       |       |       |      |      | 100   | 96              |
| S5     | 10   | 14       | Ap      |       |       |       | 0.39  |      |       | 46.47 | 1.11 |      | 37.67 | 1.25 | 6.78  |    |       |      |       |     |     |     |     |       |      |     |       | 1.18  |       | 5.14 | 100  | 100   |                 |
| S5     | 10   | 15       | Grt     | 39.69 |       | 20.95 | 30.13 | 1.62 | 3.13  | 4.48  |      |      |       |      |       |    |       |      |       |     |     |     |     |       |      |     |       |       |       |      |      | 100   | 112             |
| S5     | 10   | 16       | Grt     | 39.59 |       | 21.09 | 33.04 | 0.48 | 3.21  | 2.57  |      |      |       |      |       |    |       |      |       |     |     |     |     |       |      |     |       |       |       |      |      | 100   | 111             |
| S5     | 10   | 17       | Ep      | 47.93 | 0.25  | 19.14 | 10.19 |      |       | 19.50 |      |      |       |      |       |    |       |      |       |     |     |     |     |       |      |     |       |       |       |      |      | 97    | 106             |
| S5     | 11   | 1        | Grt     | 40.18 |       | 21.35 | 28.81 | 0.94 | 6.11  | 2.60  |      |      |       |      |       |    |       |      |       |     |     |     |     |       |      |     |       |       |       |      |      | 100   | 113             |
| S5     | 11   | 2        | Grt     | 40.84 |       | 21.26 | 24.33 | 2.83 | 7.64  | 3.09  |      |      |       |      |       |    |       |      |       |     |     |     |     |       |      |     |       |       |       |      |      | 100   | 113             |
| S5     | 11   | 3        | Ep      | 40.67 |       | 25.99 | 8.06  |      | 0.37  | 21.91 |      |      |       |      |       |    |       |      |       |     |     |     |     |       |      |     |       |       |       |      |      | 97    | 108             |
| S5     | 11   | 4        | Chr     |       | 0.40  | 21.05 | 24.76 |      | 10.11 |       |      |      |       |      |       |    |       |      | 43.69 |     |     |     |     |       |      |     |       |       |       |      |      | 100   | 106             |
| S5     | 11   | 5        | Tur     | 37.91 | 0.32  | 32.13 | 7.40  |      | 6.30  | 1.04  | 1.90 |      |       |      |       |    |       |      |       |     |     |     |     |       |      |     |       |       |       |      |      | 87    | 100             |
| S5     | 11   | 6        | Dol     | 0.50  |       |       |       | 1.63 | 18.77 | 33.10 |      |      |       |      |       |    |       |      |       |     |     |     |     |       |      |     |       |       |       |      |      | 54    | 57              |
| S5     | 11   | 7        | Grt     | 39.61 |       | 20.91 | 25.92 | 3.28 | 1.07  | 9.22  |      |      |       |      |       |    |       |      |       |     |     |     |     |       |      |     |       |       |       |      |      | 100   | 113             |
| S5     | 11   | 8        | Grt     | 39.75 |       | 21.13 | 28.29 | 0.78 | 3.75  | 6.29  |      |      |       |      |       |    |       |      |       |     |     |     |     |       |      |     |       |       |       |      |      | 100   | 115             |
| S5     | 11   | 9        | Cpx     | 54.95 |       | 2.11  | 3.54  |      | 16.77 | 22.02 |      |      |       |      |       |    |       |      | 0.59  |     |     |     |     |       |      |     |       |       |       |      |      | 100   | 118             |
| S5     | 11   | 10       | Chl     | 26.18 | 0.24  | 20.87 | 21.02 | 0.27 | 16.07 |       | 0.35 |      |       |      |       |    |       |      |       |     |     |     |     |       |      |     |       |       |       |      |      | 85    | 99              |
| S5     | 11   | 11       | Ep      | 40.09 |       | 21.92 | 12.51 |      |       | 22.47 |      |      |       |      |       |    |       |      |       |     |     |     |     |       |      |     |       |       |       |      |      | 97    | 112             |
| S5     | 11   | 12       | Spl     |       |       | 35.85 | 16.59 |      | 15.05 |       |      |      |       |      |       |    |       |      | 32.51 |     |     |     |     |       |      |     |       |       |       |      |      | 100   | 113             |
| S5     | 11   | 13       | Spl     |       |       | 29.37 | 16.64 |      | 15.06 |       |      |      |       |      |       |    |       |      | 38.93 |     |     |     |     |       |      |     |       |       |       |      |      | 100   | 111             |
| S5     | 11   | 14       | Chr     |       | 0.61  | 11.84 | 34.80 |      | 6.21  |       |      |      |       |      |       |    |       |      | 46.54 |     |     |     |     |       |      |     |       |       |       |      |      | 100   | 106             |
| S5     | 11   | 15       | Grt     | 39.43 |       | 21.07 | 30.98 | 3.65 | 2.83  | 2.05  |      |      |       |      |       |    |       |      |       |     |     |     |     |       |      |     |       |       |       |      |      | 100   | 113             |
| S5     | 11   | 16       | Ap +    | 1.41  |       | 0.79  | 0.46  |      | 0.45  | 56.88 | 0.45 |      | 24.58 | 0.65 | 12.94 |    |       |      |       |     |     |     |     |       |      |     |       |       |       |      | 1.38 | 100   | 96              |
| S5     | 11   | 17       | Qz      | 99.46 |       |       | 0.23  |      |       |       |      |      |       |      |       |    |       |      | 0.32  |     |     |     |     |       |      |     |       |       |       |      |      | 100   | 119             |
| S5     | 11   | 18       | Chr     |       |       | 23.74 | 15.48 |      | 14.17 |       |      |      |       |      |       |    |       |      | 46.61 |     |     |     |     |       |      |     |       |       |       |      |      | 100   | 107             |
| S5     | 12   | 1        | Feohy   | 4.96  |       |       | 95.04 |      |       |       |      |      |       |      |       |    |       |      |       |     |     |     |     |       |      |     |       |       |       |      |      | 100   | 83              |
| S5     | 12   | 2        | Chl     | 26.50 |       | 19.31 | 23.79 | 0.88 | 14.14 |       | 0.38 |      |       |      |       |    |       |      |       |     |     |     |     |       |      |     |       |       |       |      |      | 85    | 98              |
| S5     | 12   | 3        | Ep      | 39.81 |       | 22.53 | 11.97 | 0.33 |       | 22.36 |      |      |       |      |       |    |       |      |       |     |     |     |     |       |      |     |       |       |       |      |      | 97    | 110             |
| S5     | 12   | 4        | Chl     | 33.49 |       | 17.60 | 23.04 | 3.58 | 1.16  | 6.14  |      |      |       |      |       |    |       |      |       |     |     |     |     |       |      |     |       |       |       |      |      | 85    | 114             |
| S5     | 12   | 5        | Ep      | 39.21 | 0.52  | 22.73 | 11.90 |      | 2.94  | 19.69 |      |      |       |      |       |    |       |      |       |     |     |     |     |       |      |     |       |       |       |      |      | 97    | 108             |
| S5     | 12   | 6        | TiO2    |       | 99.60 |       | 0.40  |      |       |       |      |      |       |      |       |    |       |      |       |     |     |     |     |       |      |     |       |       |       |      |      | 100   | 106             |
| S5     | 12   | 7        | Qz +    | 78.99 | 3.10  | 10.66 | 1.43  |      | 1.74  |       |      | 4.09 |       |      |       |    |       |      |       |     |     |     |     |       |      |     |       |       |       |      |      | 100   | 116             |
| S5     | 12   | 8        | Qz      | 99.74 |       |       | 0.26  |      |       |       |      |      |       |      |       |    |       |      |       |     |     |     |     |       |      |     |       |       |       |      |      | 100   | 116             |
| S5     | 12   | 9        | Feohy + | 4.66  |       | 1.04  | 93.82 |      |       | 0.48  |      |      |       |      |       |    |       |      |       |     |     |     |     |       |      |     |       |       |       |      |      | 100   | 80              |
| S5     | 12   | 10       | Feohy   | 5.85  |       | 0.85  | 92.04 |      | 0.68  | 0.58  |      |      |       |      |       |    |       |      |       |     |     |     |     |       |      |     |       |       |       |      |      | 100   | 83              |
| S5     | 12   | 11       | Dol +   | 3.01  |       | 1.17  | 1.38  | 3.01 | 27.06 | 51.69 |      |      |       |      | 12.70 |    |       |      |       |     |     |     |     |       |      |     |       |       |       |      |      | 100   | 33              |
| S5     | 12   | 12       | Grt     | 40.66 |       | 21.61 | 26.20 | 1.40 | 9.59  | 0.54  |      |      |       |      |       |    |       |      |       |     |     |     |     |       |      |     |       |       |       |      |      | 100   | 115             |
| S5     | 12   | 13       | Feohy + | 5.72  |       | 0.84  | 91.93 |      | 1.05  | 0.47  |      |      |       |      |       |    |       |      |       |     |     |     |     |       |      |     |       |       |       |      |      | 100   | 81              |
| S5     | 12   | 14       | Pmp     | 46.06 |       | 23.70 | 0.33  |      |       | 25.91 |      |      |       |      |       |    |       |      |       |     |     |     |     |       |      |     |       |       |       |      |      | 96    | 109             |
| S5     | 12   | 15       | Hbl     | 48.48 | 0.53  | 9.01  | 8.60  |      | 15.23 | 11.75 | 1.35 |      |       |      |       |    |       |      | 2.05  |     |     |     |     |       |      |     |       |       |       |      |      | 97    | 112             |
| S5     | 12   | 16       | Grt     | 39.67 |       | 20.97 | 28.99 | 1.75 | 2.23  | 6.39  |      |      |       |      |       |    |       |      |       |     |     |     |     |       |      |     |       |       |       |      |      | 100   | 112             |
| S5     | 12   | 17       | Grt     | 39.44 |       | 20.26 | 27.14 | 0.44 | 2.66  | 7.07  |      |      |       |      |       |    |       |      |       |     |     |     |     | 2.99  |      |     |       |       |       |      |      | 100   | 111             |
| S5     | 12   | 18       | Grt     | 39.82 |       | 20.92 | 31.63 | 0.87 | 4.31  | 2.46  |      |      |       |      |       |    |       |      |       |     |     |     |     |       |      |     |       |       |       |      |      | 100   | 114             |
| S5     | 13   | 1        | Zrn     | 30.97 |       |       |       |      |       |       |      |      |       |      |       |    |       |      |       |     |     |     |     | 67.44 |      |     |       |       | 1.59  |      |      | 100   | 122             |
| S5     | 13   | 2        | Tur     | 38.65 |       | 31.17 | 7.80  |      | 6.65  |       | 2.74 |      |       |      |       |    |       |      |       |     |     |     |     |       |      |     |       |       |       |      |      | 87    | 98              |
| S5     | 13   | 3        | Grt     | 39.99 |       | 21.04 | 26.13 | 1.35 | 1.74  | 9.75  |      |      |       |      |       |    |       |      |       |     |     |     |     |       |      |     |       |       |       |      |      | 100   | 111             |
| S5     | 13   | 4        | Chr     |       |       | 6.36  | 20.29 |      | 9.54  |       |      |      |       |      |       |    |       | 0.37 | 63.43 |     |     |     |     |       |      |     |       |       |       |      |      | 100   | 104             |
| S5     | 13   | 5        | Spl     |       |       | 33.89 | 15.94 |      | 16.76 |       |      |      |       |      |       |    |       |      | 33.41 |     |     |     |     |       |      |     |       |       |       |      |      | 100   | 106             |
| S5     | 13   | 6        | TiO2    |       | 99.04 |       | 0.96  |      |       |       |      |      |       |      |       |    |       |      |       |     |     |     |     |       |      |     |       |       |       |      |      | 100   | 103             |
| S5     | 13   | 7        | Grt     | 40.06 |       | 21.26 | 23.72 | 1.12 | 4.26  | 9.58  |      |      |       |      |       |    |       |      |       |     |     |     |     |       |      |     |       |       |       |      |      | 100   | 108             |
| S5     | 13   | 8        | Chl     | 27.18 |       | 19.54 | 24.98 |      | 13.30 |       |      |      |       |      |       |    |       |      |       |     |     |     |     |       |      |     |       |       |       |      |      | 85    | 95              |

Table B2.1: EDS analyses from sample S5.

| Sample | Site | Position | Mineral | SiO2  | TiO2  | Al2O3 | FeO   | MnO   | MgO   | CaO   | Na2O | K2O   | P2O5  | SO3  | F     | Cl   | Sc2O3 | V2O5 | Cr2O3 | CoO | NiO | CuO | ZnO  | SrO  | ZrO2 | BaO | La2O3 | Ce2O3 | Nd2O3 | HfO2 | WO3  | Total | Actual<br>Total |
|--------|------|----------|---------|-------|-------|-------|-------|-------|-------|-------|------|-------|-------|------|-------|------|-------|------|-------|-----|-----|-----|------|------|------|-----|-------|-------|-------|------|------|-------|-----------------|
| S5     | 13   | 9        | Grt     | 39.53 |       | 20.96 | 23.72 | 10.72 | 3.94  | 1.13  |      |       |       |      |       |      |       |      |       |     |     |     |      |      |      |     |       |       |       |      | 100  | 109   |                 |
| S5     | 13   | 10       | Chr     |       |       | 24.29 | 18.48 |       | 13.29 |       |      |       |       |      |       |      |       |      | 43.94 |     |     |     |      |      |      |     |       |       |       |      |      | 100   | 106             |
| S5     | 13   | 11       | Ap      |       |       |       |       |       |       | 48.90 |      |       | 44.48 |      | 5.05  |      |       |      |       |     |     |     |      |      |      |     |       |       |       |      | 1.58 | 100   | 121             |
| S5     | 13   | 12       | Ep      | 40.82 |       | 28.07 | 5.51  | 0.26  |       | 22.04 | 0.30 |       |       |      |       |      |       |      |       |     |     |     |      |      |      |     |       |       |       |      |      | 97    | 111             |
| S5     | 13   | 13       | Spl     |       |       | 26.81 | 16.98 |       | 14.20 |       |      |       |       |      |       |      |       |      | 42.01 |     |     |     |      |      |      |     |       |       |       |      |      | 100   | 110             |
| S5     | 13   | 14       | Chr     |       |       | 12.58 | 18.51 | 1.59  | 10.05 |       |      |       |       |      |       |      |       |      | 56.70 |     |     |     | 0.57 |      |      |     |       |       |       |      |      | 100   | 109             |
| S5     | 13   | 15       | Chr     |       |       | 12.97 | 18.95 |       | 11.65 |       |      |       |       |      |       |      |       |      | 56.42 |     |     |     |      |      |      |     |       |       |       |      |      | 100   | 107             |
| S5     | 13   | 16       | Chl     | 27.19 |       | 19.75 | 25.81 | 0.31  | 11.65 |       | 0.29 |       |       |      |       |      |       |      |       |     |     |     |      |      |      |     |       |       |       |      |      | 85    | 95              |
| S5     | 13   | 17       | Ep      | 40.08 |       | 24.91 | 9.30  |       |       | 22.71 |      |       |       |      |       |      |       |      |       |     |     |     |      |      |      |     |       |       |       |      |      | 97    | 110             |
| S5     | 13   | 18       | Spl     |       |       | 28.53 | 16.33 |       | 15.34 |       |      |       |       |      |       |      |       |      | 39.79 |     |     |     |      |      |      |     |       |       |       |      |      | 100   | 109             |
| S5     | 13   | 19       | Chr     |       |       | 15.07 | 21.75 |       | 10.95 |       |      |       |       |      |       |      |       |      | 52.22 |     |     |     |      |      |      |     |       |       |       |      |      | 100   | 106             |
| S5     | 14   | 1        | Spl     |       | 0.41  | 50.34 | 13.28 |       | 18.50 |       |      |       |       |      |       |      |       |      | 17.46 |     |     |     |      |      |      |     |       |       |       |      |      | 100   | 109             |
| S5     | 14   | 2        | Tur     | 38.37 | 0.53  | 31.05 | 8.98  |       | 5.40  |       | 2.67 |       |       |      |       |      |       |      |       |     |     |     |      |      |      |     |       |       |       |      |      | 87    | 96              |
| S5     | 14   | 3        | TiO2    |       | 98.96 |       | 0.40  |       |       |       |      |       |       |      |       |      |       |      | 0.64  |     |     |     |      |      |      |     |       |       |       |      |      | 100   | 105             |
| S5     | 14   | 4        | Chr     |       | 0.42  | 19.79 | 14.87 |       | 14.81 |       |      |       |       |      |       |      |       | 0.34 | 49.77 |     |     |     |      |      |      |     |       |       |       |      |      | 100   | 108             |
| S5     | 14   | 5        | Chr     |       | 0.35  | 8.79  | 21.61 |       | 8.52  |       |      |       |       |      |       |      |       |      | 60.73 |     |     |     |      |      |      |     |       |       |       |      |      | 100   | 106             |
| S5     | 14   | 6        | Chr     |       |       | 9.72  | 22.97 |       | 7.31  |       |      |       |       |      |       |      |       | 0.42 | 59.57 |     |     |     |      |      |      |     |       |       |       |      |      | 100   | 107             |
| S5     | 14   | 7        | Ttn     | 33.07 | 37.01 | 1.76  | 0.41  |       |       | 27.75 |      |       |       |      |       |      |       |      |       |     |     |     |      |      |      |     |       |       |       |      |      | 100   | 108             |
| S5     | 14   | 8        | Grt     | 39.41 |       | 20.78 | 29.34 | 0.70  | 1.88  | 7.89  |      |       |       |      |       |      |       |      |       |     |     |     |      |      |      |     |       |       |       |      |      | 100   | 112             |
| S5     | 14   | 9        | Ep      | 40.31 |       | 24.46 | 9.31  |       |       | 22.91 |      |       |       |      |       |      |       |      |       |     |     |     |      |      |      |     |       |       |       |      |      | 97    | 108             |
| S5     | 14   | 10       | Ep      | 41.29 |       | 26.74 | 2.59  |       | 3.40  | 22.98 |      |       |       |      |       |      |       |      |       |     |     |     |      |      |      |     |       |       |       |      |      | 97    | 107             |
| S5     | 14   | 11       | Ep      | 39.91 | 0.46  | 21.60 | 13.05 |       | 21.99 |       |      |       |       |      |       |      |       |      |       |     |     |     |      |      |      |     |       |       |       |      |      | 97    | 112             |
| S5     | 14   | 12       | Grt     | 39.42 |       | 20.88 | 34.79 | 0.61  | 3.21  | 1.09  |      |       |       |      |       |      |       |      |       |     |     |     |      |      |      |     |       |       |       |      |      | 100   | 115             |
| S5     | 14   | 13       | Ap      |       |       |       |       |       |       | 49.89 |      |       | 44.78 |      | 3.64  | 0.17 |       |      |       |     |     |     |      |      |      |     |       |       |       |      | 1.52 | 100   | 123             |
| S5     | 14   | 14       | Chr     |       |       | 15.57 | 19.50 |       | 10.80 |       |      |       |       |      |       |      |       |      | 54.13 |     |     |     |      |      |      |     |       |       |       |      |      | 100   | 111             |
| S5     | 14   | 15       | Ms      | 51.09 | 0.29  | 26.24 | 4.22  |       | 2.72  |       | 0.32 | 10.13 |       |      |       |      |       |      |       |     |     |     |      |      |      |     |       |       |       |      |      | 95    | 106             |
| S5     | 14   | 16       | Ap      |       |       |       | 0.41  |       |       | 48.77 |      |       | 44.48 |      | 3.96  | 0.73 |       |      |       |     |     |     |      |      |      |     |       |       |       |      | 1.64 | 100   | 121             |
| S5     | 14   | 17       | Chl     | 27.80 |       | 20.89 | 20.02 |       | 15.79 |       | 0.49 |       |       |      |       |      |       |      |       |     |     |     |      |      |      |     |       |       |       |      |      | 85    | 95              |
| S5     | 15   | 1        | Spl     |       |       | 25.98 | 18.39 |       | 13.34 |       |      |       |       |      |       |      |       |      | 42.28 |     |     |     |      |      |      |     |       |       |       |      |      | 100   | 109             |
| S5     | 15   | 2        | Grt     | 39.28 | 0.29  | 20.73 | 27.91 | 4.25  | 1.52  | 6.01  |      |       |       |      |       |      |       |      |       |     |     |     |      |      |      |     |       |       |       |      |      | 100   | 113             |
| S5     | 15   | 3        | Chr     |       |       | 14.84 | 20.71 |       | 9.97  |       |      |       |       |      |       |      |       | 0.35 | 54.13 |     |     |     |      |      |      |     |       |       |       |      |      | 100   | 105             |
| S5     | 15   | 4        | Feohy + | 3.77  |       |       | 95.77 |       |       | 0.46  |      |       |       |      |       |      |       |      |       |     |     |     |      |      |      |     |       |       |       |      |      | 100   | 83              |
| S5     | 15   | 5        | Ttn     | 34.73 | 32.33 | 3.74  | 2.69  |       | 0.40  | 26.12 |      |       |       |      |       |      |       |      |       |     |     |     |      |      |      |     |       |       |       |      |      | 100   | 109             |
| S5     | 15   | 6        | Chl     | 28.83 |       | 19.56 | 25.61 |       | 10.35 | 0.38  |      |       |       |      |       |      |       |      | 0.27  |     |     |     |      |      |      |     |       |       |       |      |      | 85    | 99              |
| S5     | 15   | 7        | Ep      | 40.22 |       | 26.33 | 7.93  | 0.23  |       | 22.29 |      |       |       |      |       |      |       |      |       |     |     |     |      |      |      |     |       |       |       |      |      | 97    | 110             |
| S5     | 15   | 8        | TiO2    |       | 99.67 |       | 0.33  |       |       |       |      |       |       |      |       |      |       |      |       |     |     |     |      |      |      |     |       |       |       |      |      | 100   | 108             |
| S5     | 15   | 9        | Ap +    | 1.25  |       |       |       |       |       | 44.95 | 0.95 |       | 39.89 | 1.13 | 8.15  |      |       |      |       |     |     |     |      | 3.28 |      |     |       |       |       |      | 0.40 | 100   | 113             |
| S5     | 15   | 10       | Grt     | 39.72 |       | 20.82 | 29.44 | 0.43  | 1.51  | 8.08  |      |       |       |      |       |      |       |      |       |     |     |     |      |      |      |     |       |       |       |      |      | 100   | 111             |
| S5     | 15   | 11       | Grt     | 39.51 |       | 21.00 | 27.47 | 3.11  | 1.54  | 7.02  |      |       |       |      |       |      |       |      | 0.35  |     |     |     |      |      |      |     |       |       |       |      |      | 100   | 110             |
| S5     | 15   | 12       | Grt     | 39.42 |       | 21.09 | 30.11 | 3.86  | 3.43  | 2.08  |      |       |       |      |       |      |       |      |       |     |     |     |      |      |      |     |       |       |       |      |      | 100   | 109             |
| S5     | 15   | 13       | Chl     | 26.12 |       | 22.26 | 30.41 |       | 6.21  |       |      |       |       |      |       |      |       |      |       |     |     |     |      |      |      |     |       |       |       |      |      | 85    | 94              |
| S5     | 15   | 14       | Chl     | 24.57 |       | 22.20 | 27.60 |       | 10.63 |       |      |       |       |      |       |      |       |      |       |     |     |     |      |      |      |     |       |       |       |      |      | 85    | 97              |
| S5     | 15   | 15       | Chl     | 28.18 |       | 19.52 | 18.48 |       | 18.83 |       |      |       |       |      |       |      |       |      |       |     |     |     |      |      |      |     |       |       |       |      |      | 85    | 96              |
| S5     | 15   | 16       | Ep      | 39.96 |       | 22.47 | 12.29 |       |       | 22.28 |      |       |       |      |       |      |       |      |       |     |     |     |      |      |      |     |       |       |       |      |      | 97    | 106             |
| S5     | 15   | 17       | Ab      | 64.80 | 0.90  | 20.93 | 0.90  |       | 0.81  | 0.68  | 9.44 | 1.56  |       |      |       |      |       |      |       |     |     |     |      |      |      |     |       |       |       |      |      | 100   | 109             |
| S5     | 15   | 18       | Ttn     | 32.95 | 36.88 | 1.61  | 0.95  |       |       | 27.61 |      |       |       |      |       |      |       |      |       |     |     |     |      |      |      |     |       |       |       |      |      | 100   | 109             |
| S5     | 15.1 | 1        | Fl +    |       | 3.34  |       | 0.25  |       |       | 54.06 |      |       |       |      | 42.36 |      |       |      |       |     |     |     |      |      |      |     |       |       |       |      |      | 100   | 105             |
| S5     | 15.1 | 2        | Ttn     | 31.85 | 34.41 | 4.53  | 0.41  |       |       | 26.69 |      |       |       |      | 2.12  |      |       |      |       |     |     |     |      |      |      |     |       |       |       |      |      | 100   | 111             |
| S5     | 15.1 | 3        | TiO2    | 0.79  | 95.59 |       | 2.38  |       |       | 1.25  |      |       |       |      |       |      |       |      |       |     |     |     |      |      |      |     |       |       |       |      |      | 100   | 106             |
| S5     | 16   | 1        | Feohy + | 4.36  |       |       | 94.97 |       |       | 0.35  |      |       |       |      |       |      |       |      | 0.32  |     |     |     |      |      |      |     |       |       |       |      |      | 100   | 82              |



Table B2.1: EDS analyses from sample S5.

| Sample | Site | Position | Mineral | SiO2   | TiO2   | Al2O3 | FeO   | MnO   | MgO   | CaO   | Na2O | K2O  | P2O5  | SO3  | F    | Cl   | Sc2O3 | V2O5 | Cr2O3 | CoO | NiO  | CuO | ZnO | SrO  | ZrO2 | BaO | La2O3 | Ce2O3 | Nd2O3 | HfO2 | WO3  | Total | Actual<br>Total |     |     |
|--------|------|----------|---------|--------|--------|-------|-------|-------|-------|-------|------|------|-------|------|------|------|-------|------|-------|-----|------|-----|-----|------|------|-----|-------|-------|-------|------|------|-------|-----------------|-----|-----|
| S5     | 16   | 2        | Chr     |        |        | 9.07  | 21.79 |       | 8.97  |       |      |      |       |      |      |      |       | 0.43 | 59.74 |     |      |     |     |      |      |     |       |       |       |      |      | 100   | 106             |     |     |
| S5     | 16   | 3        | TiO2    |        | 100.00 |       |       |       |       |       |      |      |       |      |      |      |       |      |       |     |      |     |     |      |      |     |       |       |       |      |      |       | 100             | 107 |     |
| S5     | 16   | 4        | Feohy + | 3.15   |        | 3.11  | 91.84 |       |       |       |      |      |       |      |      |      |       |      | 1.08  |     | 0.83 |     |     |      |      |     |       |       |       |      |      |       | 100             | 92  |     |
| S5     | 16   | 5        | Ep      | 39.71  |        | 21.87 | 13.10 |       |       | 22.32 |      |      |       |      |      |      |       |      |       |     |      |     |     |      |      |     |       |       |       |      |      |       | 97              | 108 |     |
| S5     | 16   | 6        | Ap      |        |        |       |       |       |       | 48.85 |      |      | 43.93 |      | 5.23 | 0.35 |       |      |       |     |      |     |     |      |      |     |       |       |       |      | 1.64 |       | 100             | 121 |     |
| S5     | 16   | 7        | TiO2    | 0.91   | 97.12  |       | 1.97  |       |       |       |      |      |       |      |      |      |       |      |       |     |      |     |     |      |      |     |       |       |       |      |      |       | 100             | 103 |     |
| S5     | 16   | 8        | Spl     |        |        | 29.15 | 15.07 |       | 15.20 |       |      |      |       |      |      |      |       |      | 40.57 |     |      |     |     |      |      |     |       |       |       |      |      |       |                 | 100 | 110 |
| S5     | 16   | 9        | Spl     |        | 0.39   | 26.23 | 20.04 |       | 13.90 |       |      |      |       |      |      |      |       |      | 39.43 |     |      |     |     |      |      |     |       |       |       |      |      |       |                 | 100 | 111 |
| S5     | 16   | 10       | Feohy + | 8.13   |        | 1.26  | 88.76 |       |       | 0.53  |      |      | 1.01  |      |      |      |       |      | 0.31  |     |      |     |     |      |      |     |       |       |       |      |      |       |                 | 100 | 81  |
| S5     | 16   | 11       | Grt     | 39.93  |        | 20.41 | 18.48 | 3.73  | 0.48  | 16.98 |      |      |       |      |      |      |       |      |       |     |      |     |     |      |      |     |       |       |       |      |      |       |                 | 100 | 116 |
| S5     | 16   | 12       | Grt     | 39.22  |        | 20.74 | 16.47 | 15.49 | 0.57  | 7.51  |      |      |       |      |      |      |       |      |       |     |      |     |     |      |      |     |       |       |       |      |      |       |                 | 100 | 114 |
| S5     | 16   | 13       | Chl     | 26.83  |        | 19.96 | 22.70 | 0.30  | 15.20 |       |      |      |       |      |      |      |       |      |       |     |      |     |     |      |      |     |       |       |       |      |      |       |                 | 85  | 98  |
| S5     | 16   | 14       | Chl     | 26.85  |        | 20.01 | 22.63 | 0.23  | 14.71 |       | 0.57 |      |       |      |      |      |       |      |       |     |      |     |     |      |      |     |       |       |       |      |      |       |                 | 85  | 99  |
| S5     | 16   | 15       | Chl     | 25.15  |        | 22.25 | 30.78 |       | 6.49  |       | 0.33 |      |       |      |      |      |       |      |       |     |      |     |     |      |      |     |       |       |       |      |      |       |                 | 85  | 98  |
| S5     | 16   | 16       | Grt     | 39.41  |        | 20.96 | 32.04 |       | 1.61  | 5.98  |      |      |       |      |      |      |       |      |       |     |      |     |     |      |      |     |       |       |       |      |      |       |                 | 100 | 113 |
| S5     | 16   | 17       | TiO2 +  | 12.78  | 86.30  |       | 0.93  |       |       |       |      |      |       |      |      |      |       |      |       |     |      |     |     |      |      |     |       |       |       |      |      |       |                 | 100 | 108 |
| S5     | 16   | 18       | Grt     | 39.27  |        | 20.88 | 32.14 | 3.04  | 3.40  | 1.28  |      |      |       |      |      |      |       |      |       |     |      |     |     |      |      |     |       |       |       |      |      |       |                 | 100 | 113 |
| S5     | 16   | 19       | Ep      | 39.62  |        | 21.73 | 13.19 | 0.30  |       | 22.16 |      |      |       |      |      |      |       |      |       |     |      |     |     |      |      |     |       |       |       |      |      |       |                 | 97  | 109 |
| S5     | 16   | 20       | Grt     | 38.93  |        | 20.60 | 34.97 | 1.24  | 1.49  | 2.77  |      |      |       |      |      |      |       |      |       |     |      |     |     |      |      |     |       |       |       |      |      |       |                 | 100 | 116 |
| S5     | 16   | 21       | Grt     | 40.30  |        | 21.24 | 27.62 | 0.39  | 5.66  | 4.79  |      |      |       |      |      |      |       |      |       |     |      |     |     |      |      |     |       |       |       |      |      |       |                 | 100 | 119 |
| S5     | 17   | 1        | Pg      | 48.37  |        | 38.22 | 0.33  |       |       |       | 7.38 | 0.69 |       |      |      |      |       |      |       |     |      |     |     |      |      |     |       |       |       |      |      |       |                 | 95  | 106 |
| S5     | 17   | 2        | Grt     | 39.36  |        | 20.97 | 34.47 | 0.38  | 3.71  | 1.10  |      |      |       |      |      |      |       |      |       |     |      |     |     |      |      |     |       |       |       |      |      |       |                 | 100 | 112 |
| S5     | 17   | 3        | Chr     |        |        | 14.92 | 17.99 |       | 12.23 |       |      |      |       |      |      |      |       |      | 54.86 |     |      |     |     |      |      |     |       |       |       |      |      |       |                 | 100 | 106 |
| S5     | 17   | 4        | Ep      | 40.21  |        | 22.99 | 11.27 |       |       | 22.53 |      |      |       |      |      |      |       |      |       |     |      |     |     |      |      |     |       |       |       |      |      |       |                 | 97  | 105 |
| S5     | 17   | 5        | Ep      | 40.34  |        | 24.91 | 9.06  | 0.36  |       | 22.33 |      |      |       |      |      |      |       |      |       |     |      |     |     |      |      |     |       |       |       |      |      |       |                 | 97  | 107 |
| S5     | 17   | 6        | Grt     | 39.51  |        | 20.64 | 20.58 | 11.18 | 2.36  | 5.72  |      |      |       |      |      |      |       |      |       |     |      |     |     |      |      |     |       |       |       |      |      |       |                 | 100 | 113 |
| S5     | 17   | 7        | Ep      | 41.33  | 1.13   | 20.70 | 7.60  |       | 7.91  | 17.82 | 0.50 |      |       |      |      |      |       |      |       |     |      |     |     |      |      |     |       |       |       |      |      |       |                 | 97  | 104 |
| S5     | 17   | 8        | Qz      | 100.00 |        |       |       |       |       |       |      |      |       |      |      |      |       |      |       |     |      |     |     |      |      |     |       |       |       |      |      |       |                 | 100 | 122 |
| S5     | 17   | 9        | Grt     | 39.14  |        | 21.01 | 24.76 | 6.85  | 2.13  | 6.11  |      |      |       |      |      |      |       |      |       |     |      |     |     |      |      |     |       |       |       |      |      |       |                 | 100 | 117 |
| S5     | 17   | 10       | Ep      | 40.85  |        | 24.91 | 8.70  |       |       | 22.17 | 0.37 |      |       |      |      |      |       |      |       |     |      |     |     |      |      |     |       |       |       |      |      |       |                 | 97  | 110 |
| S5     | 17   | 11       | Spl     |        |        | 28.73 | 17.43 |       | 13.89 |       |      |      |       |      |      |      |       |      | 39.94 |     |      |     |     |      |      |     |       |       |       |      |      |       |                 | 100 | 110 |
| S5     | 17   | 12       | Grt     | 40.05  |        | 21.41 | 26.45 | 1.05  | 4.51  | 6.54  |      |      |       |      |      |      |       |      |       |     |      |     |     |      |      |     |       |       |       |      |      |       |                 | 100 | 115 |
| S5     | 17   | 13       | Grt     | 39.17  |        | 20.78 | 34.27 | 1.05  | 1.61  | 3.12  |      |      |       |      |      |      |       |      |       |     |      |     |     |      |      |     |       |       |       |      |      |       |                 | 100 | 113 |
| S5     | 17   | 14       | Ap      |        |        |       | 0.32  |       | 0.37  | 48.11 |      |      | 43.99 | 0.61 | 4.48 | 0.54 |       |      |       |     |      |     |     |      |      |     |       |       |       |      |      | 1.58  |                 | 100 | 123 |
| S5     | 17   | 15       | Chl     | 26.76  |        | 21.21 | 27.00 | 0.31  | 9.29  |       | 0.42 |      |       |      |      |      |       |      |       |     |      |     |     |      |      |     |       |       |       |      |      |       |                 | 85  | 95  |
| S5     | 17   | 16       | Feohy + | 8.62   |        | 0.88  | 89.20 |       | 0.55  | 0.76  |      |      |       |      |      |      |       |      |       |     |      |     |     |      |      |     |       |       |       |      |      |       |                 | 100 | 75  |
| S5     | 17   | 17       | Ap      |        |        |       | 0.23  |       |       | 48.47 |      |      | 43.42 | 0.45 | 5.19 | 0.38 |       |      |       |     |      |     |     |      |      |     |       |       |       |      |      | 1.86  |                 | 100 | 122 |
| S5     | 17   | 18       | Qz +    | 91.94  | 0.51   | 4.59  | 1.02  |       | 0.63  |       |      | 1.32 |       |      |      |      |       |      |       |     |      |     |     |      |      |     |       |       |       |      |      |       |                 | 100 | 112 |
| S5     | 18   | 1        | Ol      | 40.41  |        |       | 17.82 | 0.32  | 41.46 |       |      |      |       |      |      |      |       |      |       |     |      |     |     |      |      |     |       |       |       |      |      |       |                 | 100 | 114 |
| S5     | 18   | 2        | TiO2 +  | 1.56   | 81.57  | 1.22  | 12.25 | 1.19  |       | 0.39  |      |      |       |      |      |      |       |      |       |     |      |     |     |      |      |     |       |       |       |      |      | 1.83  |                 | 100 | 98  |
| S5     | 18   | 3        | Ttn     | 32.06  | 37.30  | 0.89  | 2.14  |       |       | 26.88 |      |      |       |      |      |      |       | 0.73 |       |     |      |     |     |      |      |     |       |       |       |      |      |       |                 | 100 | 110 |
| S5     | 18   | 4        | Ap +    | 1.17   |        |       | 0.34  |       |       | 47.19 | 0.86 |      | 38.67 | 0.99 | 7.63 |      |       |      |       |     |      |     |     | 3.18 |      |     |       |       |       |      |      | -0.04 |                 | 100 | 108 |
| S5     | 18   | 5        | Ep      | 40.95  |        | 22.17 | 8.57  |       | 2.76  | 22.53 |      |      |       |      |      |      |       |      |       |     |      |     |     |      |      |     |       |       |       |      |      |       |                 | 97  | 103 |
| S5     | 18   | 6        | Grt     | 39.56  |        | 20.99 | 29.56 | 0.92  | 1.38  | 7.60  |      |      |       |      |      |      |       |      |       |     |      |     |     |      |      |     |       |       |       |      |      |       |                 | 100 | 111 |
| S5     | 18   | 7        | Aln     | 37.32  |        | 22.72 | 8.64  |       | 0.47  | 14.66 |      |      |       |      |      |      |       |      |       |     |      |     |     |      |      |     | 4.27  | 8.87  | 3.05  |      |      |       |                 | 100 | 108 |
| S5     | 18   | 8        | Chl     | 27.19  |        | 19.90 | 25.79 | 0.39  | 10.99 | 0.31  | 0.42 |      |       |      |      |      |       |      |       |     |      |     |     |      |      |     |       |       |       |      |      |       |                 | 85  | 93  |
| S5     | 18   | 9        | Ap      | 1.31   |        |       | 0.32  |       |       | 43.83 | 1.29 |      | 39.63 | 1.40 | 7.93 |      |       |      |       |     |      |     |     | 3.19 |      |     |       | 0.98  |       |      | 0.12 |       | 100             | 114 |     |
| S5     | 18   | 10       | Tur     | 37.54  | 0.57   | 31.89 | 9.87  |       | 4.58  | 0.55  | 1.98 |      |       |      |      |      |       |      |       |     |      |     |     |      |      |     |       |       |       |      |      |       |                 | 87  | 99  |
| S5     | 18   | 11       | Ep      | 40.16  |        | 24.19 | 10.07 |       |       | 22.58 |      |      |       |      |      |      |       |      |       |     |      |     |     |      |      |     |       |       |       |      |      |       |                 | 97  | 109 |
| S5     | 18   | 12       | Grt     | 39.11  |        | 20.95 | 34.17 | 0.39  | 2.19  | 3.19  |      |      |       |      |      |      |       |      |       |     |      |     |     |      |      |     |       |       |       |      |      |       |                 | 100 | 114 |

Table B2.1: EDS analyses from sample S5.

| Sample | Site | Position | Mineral | SiO2   | TiO2  | Al2O3 | FeO   | MnO  | MgO   | CaO   | Na2O | K2O   | P2O5  | SO3  | F    | Cl | Sc2O3 | V2O5 | Cr2O3 | CoO | NiO | CuO | ZnO | SrO   | ZrO2 | BaO  | La2O3 | Ce2O3 | Nd2O3 | HfO2  | WO3  | Total | Actual<br>Total |
|--------|------|----------|---------|--------|-------|-------|-------|------|-------|-------|------|-------|-------|------|------|----|-------|------|-------|-----|-----|-----|-----|-------|------|------|-------|-------|-------|-------|------|-------|-----------------|
| S5     | 18   | 13       | Feohy + | 7.32   |       |       | 92.31 |      |       | 0.37  |      |       |       |      |      |    |       |      |       |     |     |     |     |       |      |      |       |       |       |       | 100  | 78    |                 |
| S5     | 18   | 14       | Feohy + | 2.26   |       |       | 97.74 |      |       |       |      |       |       |      |      |    |       |      |       |     |     |     |     |       |      |      |       |       |       |       | 100  | 75    |                 |
| S5     | 18   | 15       | Ttn     | 33.19  | 36.96 | 1.54  | 0.67  |      | 0.35  | 27.28 |      |       |       |      |      |    |       |      |       |     |     |     |     |       |      |      |       |       |       |       | 100  | 108   |                 |
| S5     | 18   | 16       | Qz      | 100.00 |       |       |       |      |       |       |      |       |       |      |      |    |       |      |       |     |     |     |     |       |      |      |       |       |       |       | 100  | 117   |                 |
| S5     | 18   | 17       | Ap +    | 4.40   | 4.60  | 0.46  | 0.26  |      |       | 46.91 |      |       | 39.21 |      | 4.16 |    |       |      |       |     |     |     |     |       |      |      |       |       |       |       | 100  | 115   |                 |
| S5     | 18   | 18       | Qz +    | 89.70  | 1.83  | 4.48  | 1.34  |      | 0.95  |       | 0.33 | 1.36  |       |      |      |    |       |      |       |     |     |     |     |       |      |      |       |       |       |       | 100  | 114   |                 |
| S5     | 18   | 19       | Ms      | 49.28  | 0.89  | 26.92 | 4.94  |      | 2.20  |       | 0.30 | 10.46 |       |      |      |    |       |      |       |     |     |     |     |       |      |      |       |       |       |       | 95   | 106   |                 |
| S5     | 18   | 20       | Ttn     | 34.33  | 28.06 | 4.82  | 4.68  |      | 4.30  | 22.82 |      |       |       |      |      |    |       | 0.99 |       |     |     |     |     |       |      |      |       |       |       |       | 100  | 108   |                 |
| S5     | 18   | 21       | Aln     | 37.42  |       | 22.09 | 9.08  |      | 0.46  | 14.61 |      |       |       |      |      |    |       |      |       |     |     |     |     |       |      | 4.48 | 9.01  | 2.84  |       |       | 100  | 108   |                 |
| S5     | 19   | 1        | Chl     | 27.68  |       | 21.92 | 16.03 | 0.55 | 18.81 |       |      |       |       |      |      |    |       |      |       |     |     |     |     |       |      |      |       |       |       |       | 85   | 104   |                 |
| S5     | 19   | 2        | TiO2 +  | 2.48   | 96.92 |       | 0.40  |      |       | 0.21  |      |       |       |      |      |    |       |      |       |     |     |     |     |       |      |      |       |       |       |       | 100  | 105   |                 |
| S5     | 19   | 3        | Ep      | 40.35  |       | 26.25 | 7.79  |      |       | 22.62 |      |       |       |      |      |    |       |      |       |     |     |     |     |       |      |      |       |       |       |       | 97   | 108   |                 |
| S5     | 19   | 4        | Ep      | 40.13  |       | 23.55 | 10.82 |      |       | 22.50 |      |       |       |      |      |    |       |      |       |     |     |     |     |       |      |      |       |       |       |       | 97   | 107   |                 |
| S5     | 19   | 5        | Grt     | 39.96  |       | 20.76 | 26.69 | 2.86 | 1.94  | 7.79  |      |       |       |      |      |    |       |      |       |     |     |     |     |       |      |      |       |       |       |       | 100  | 113   |                 |
| S5     | 19   | 6        | Zrn     | 30.86  |       |       | 0.33  |      |       |       |      |       |       |      |      |    |       |      |       |     |     |     |     | 67.55 |      |      |       |       |       | 1.26  | 100  | 122   |                 |
| S5     | 19   | 7        | Grt     | 39.89  |       | 20.97 | 27.39 | 0.87 | 3.07  | 7.82  |      |       |       |      |      |    |       |      |       |     |     |     |     |       |      |      |       |       |       |       | 100  | 113   |                 |
| S5     | 19   | 8        | Chr     |        | 0.40  | 24.34 | 29.74 |      | 9.17  |       |      |       |       |      |      |    |       |      | 36.34 |     |     |     |     |       |      |      |       |       |       |       | 100  | 106   |                 |
| S5     | 19   | 9        | Grt     | 39.63  |       | 20.83 | 22.94 | 6.98 | 0.95  | 8.67  |      |       |       |      |      |    |       |      |       |     |     |     |     |       |      |      |       |       |       |       | 100  | 114   |                 |
| S5     | 19   | 10       | Ap      |        |       |       |       |      |       | 48.65 |      |       | 44.39 |      | 5.27 |    |       |      |       |     |     |     |     |       |      |      |       |       |       |       | 1.68 | 100   | 123             |
| S5     | 19   | 11       | Chr     |        |       | 22.63 | 15.23 |      | 14.39 |       |      |       |       |      |      |    |       |      | 47.74 |     |     |     |     |       |      |      |       |       |       |       | 100  | 111   |                 |
| S5     | 19   | 12       | Chl     | 28.01  |       | 19.74 | 28.25 |      | 8.69  |       |      |       |       |      |      |    |       |      | 0.31  |     |     |     |     |       |      |      |       |       |       |       | 85   | 95    |                 |
| S5     | 19   | 13       | Ttn     | 32.66  | 32.25 | 4.42  | 0.39  |      |       | 27.58 |      |       |       |      | 2.70 |    |       |      |       |     |     |     |     |       |      |      |       |       |       |       | 100  | 115   |                 |
| S5     | 19   | 14       | Grt     | 39.22  |       | 20.66 | 35.38 | 1.00 | 1.62  | 2.11  |      |       |       |      |      |    |       |      |       |     |     |     |     |       |      |      |       |       |       |       | 100  | 115   |                 |
| S5     | 19   | 15       | Tur     | 38.43  | 0.90  | 30.02 | 6.77  |      | 7.84  | 0.40  | 2.65 |       |       |      |      |    |       |      |       |     |     |     |     |       |      |      |       |       |       |       | 87   | 99    |                 |
| S5     | 19   | 16       | Ep      | 39.78  |       | 21.44 | 13.34 |      |       | 22.45 |      |       |       |      |      |    |       |      |       |     |     |     |     |       |      |      |       |       |       |       | 97   | 112   |                 |
| S5     | 19   | 17       | Chr     |        | 0.34  | 7.91  | 24.03 |      | 7.93  |       |      |       |       |      |      |    |       |      | 59.79 |     |     |     |     |       |      |      |       |       |       |       | 100  | 110   |                 |
| S5     | 19   | 18       | Feohy + | 6.33   |       |       | 93.67 |      |       |       |      |       |       |      |      |    |       |      |       |     |     |     |     |       |      |      |       |       |       |       | 100  | 82    |                 |
| S5     | 19   | 19       | Grt     | 39.78  |       | 21.57 | 27.92 | 1.04 | 2.37  | 7.32  |      |       |       |      |      |    |       |      |       |     |     |     |     |       |      |      |       |       |       |       | 100  | 115   |                 |
| S5     | 19   | 20       | Grt     | 40.79  |       | 21.66 | 23.82 | 2.76 | 10.36 | 0.61  |      |       |       |      |      |    |       |      |       |     |     |     |     |       |      |      |       |       |       |       | 100  | 117   |                 |
| S5     | 19   | 21       | Ap      |        |       |       |       |      |       | 49.36 |      |       | 44.35 |      | 6.29 |    |       |      |       |     |     |     |     |       |      |      |       |       |       |       | 100  | 121   |                 |
| S5     | 19   | 22       | Chl     | 26.72  |       | 20.32 | 22.66 | 0.32 | 14.98 |       |      |       |       |      |      |    |       |      |       |     |     |     |     |       |      |      |       |       |       |       | 85   | 98    |                 |
| S5     | 20   | 1        | Grt     | 39.29  |       | 20.99 | 34.33 | 0.82 | 3.74  | 0.82  |      |       |       |      |      |    |       |      |       |     |     |     |     |       |      |      |       |       |       |       | 100  | 114   |                 |
| S5     | 20   | 2        | Spl     |        |       | 31.82 | 16.05 |      | 15.74 |       |      |       |       |      |      |    |       |      | 36.39 |     |     |     |     |       |      |      |       |       |       |       | 100  | 111   |                 |
| S5     | 20   | 3        | Grt     | 39.66  |       | 20.98 | 29.92 | 0.47 | 2.98  | 5.98  |      |       |       |      |      |    |       |      |       |     |     |     |     |       |      |      |       |       |       |       | 100  | 112   |                 |
| S5     | 20   | 4        | Ap      |        |       |       | 0.30  |      |       | 47.82 | 0.88 |       | 39.85 | 1.64 | 6.99 |    |       |      |       |     |     |     |     |       |      |      |       |       |       |       | 2.52 | 100   | 107             |
| S5     | 20   | 5        | Ap      |        |       |       |       |      |       | 44.31 | 1.15 |       | 39.89 | 0.99 | 8.51 |    |       |      |       |     |     |     |     |       |      |      |       | 1.80  |       | 3.34  | 100  | 108   |                 |
| S5     | 20   | 6        | Grt     | 39.48  |       | 20.32 | 32.15 | 3.49 | 2.67  | 1.89  |      |       |       |      |      |    |       |      |       |     |     |     |     |       |      |      |       |       |       |       | 100  | 114   |                 |
| S5     | 20   | 7        | TiO2    |        | 99.34 |       | 0.66  |      |       |       |      |       |       |      |      |    |       |      |       |     |     |     |     |       |      |      |       |       |       |       | 100  | 109   |                 |
| S5     | 20   | 8        | Grt     | 39.06  |       | 20.92 | 33.33 | 1.24 | 1.43  | 4.03  |      |       |       |      |      |    |       |      |       |     |     |     |     |       |      |      |       |       |       |       | 100  | 114   |                 |
| S5     | 20   | 9        | Ep      | 40.56  |       | 22.91 | 8.86  |      | 1.81  | 22.86 |      |       |       |      |      |    |       |      |       |     |     |     |     |       |      |      |       |       |       |       | 97   | 108   |                 |
| S5     | 20   | 10       | Ep      | 41.23  |       | 24.35 | 9.12  |      |       | 21.67 | 0.64 |       |       |      |      |    |       |      |       |     |     |     |     |       |      |      |       |       |       |       | 97   | 114   |                 |
| S5     | 20   | 11       | Qz      | 99.78  |       |       | 0.22  |      |       |       |      |       |       |      |      |    |       |      |       |     |     |     |     |       |      |      |       |       |       |       | 100  | 125   |                 |
| S5     | 20   | 12       | Ap      |        |       |       |       |      |       | 49.29 |      |       | 44.90 |      | 4.28 |    |       |      |       |     |     |     |     |       |      |      |       |       |       |       | 1.53 | 100   | 124             |
| S5     | 20   | 13       | Grt     | 39.23  |       | 20.72 | 26.98 | 7.59 | 2.05  | 3.43  |      |       |       |      |      |    |       |      |       |     |     |     |     |       |      |      |       |       |       |       | 100  | 113   |                 |
| S5     | 20   | 14       | Grt     | 39.66  |       | 20.86 | 25.44 | 2.59 | 1.18  | 10.27 |      |       |       |      |      |    |       |      |       |     |     |     |     |       |      |      |       |       |       |       | 100  | 113   |                 |
| S5     | 20   | 15       | Garbage |        |       |       | 1.24  |      |       | 3.54  | 3.43 |       |       |      |      |    |       |      |       |     |     |     |     |       |      |      |       |       |       | 91.78 | 100  | 113   |                 |
| S5     | 20   | 16       | Chr     |        |       | 21.07 | 16.88 |      | 13.27 |       |      |       |       |      |      |    |       | 0.33 | 48.45 |     |     |     |     |       |      |      |       |       |       |       | 100  | 111   |                 |
| S5     | 20   | 17       | Chl     | 25.98  | 0.25  | 21.13 | 25.66 |      | 11.47 |       |      | 0.26  |       |      |      |    |       |      | 0.26  |     |     |     |     |       |      |      |       |       |       |       | 85   | 97    |                 |
| S5     | 20   | 18       | Zrn     | 30.33  |       |       | 0.45  |      |       | 0.43  |      |       |       |      |      |    | 0.65  |      |       |     |     |     |     | 66.48 |      |      |       |       | 1.66  |       | 100  | 114   |                 |
| S5     | 21   | 1        | Bt      | 38.36  | 4.92  | 17.09 | 18.22 |      | 9.10  |       |      | 8.30  |       |      |      |    |       |      |       |     |     |     |     |       |      |      |       |       |       |       | 96   | 106   |                 |

Table B2.1: EDS analyses from sample S5.

| Sample | Site | Position | Mineral    | SiO2   | TiO2  | Al2O3 | FeO    | MnO  | MgO   | CaO   | Na2O | K2O   | P2O5 | SO3   | F    | Cl | Sc2O3 | V2O5 | Cr2O3 | CoO | NiO  | CuO   | ZnO | SrO   | ZrO2 | BaO | La2O3 | Ce2O3 | Nd2O3 | HfO2 | WO3   | Total | Actual Total |     |
|--------|------|----------|------------|--------|-------|-------|--------|------|-------|-------|------|-------|------|-------|------|----|-------|------|-------|-----|------|-------|-----|-------|------|-----|-------|-------|-------|------|-------|-------|--------------|-----|
| S5     | 21   | 2        | Tur        | 37.55  | 0.59  | 27.92 | 12.21  |      | 5.60  | 0.22  | 2.91 |       |      |       |      |    |       |      |       |     |      |       |     |       |      |     |       |       |       |      | 87    | 98    |              |     |
| S5     | 21   | 3        | Mix        | 32.55  | 18.00 | 11.64 | 13.54  |      | 10.32 | 13.95 |      |       |      |       |      |    |       |      |       |     |      |       |     |       |      |     |       |       |       |      |       | 100   | 103          |     |
| S5     | 21   | 4        | Amph       | 47.50  | 1.49  | 8.74  | 12.41  | 0.22 | 14.00 | 10.64 | 1.41 | 0.60  |      |       |      |    |       |      |       |     |      |       |     |       |      |     |       |       |       |      |       | 97    | 115          |     |
| S5     | 21   | 5        | Chr        |        |       | 21.97 | 17.06  |      | 13.35 |       |      |       |      |       |      |    |       | 0.35 | 47.27 |     |      |       |     |       |      |     |       |       |       |      |       |       | 100          | 112 |
| S5     | 21   | 6        | Chr        |        |       | 21.42 | 15.64  |      | 14.67 |       |      |       |      |       |      |    |       |      | 48.27 |     |      |       |     |       |      |     |       |       |       |      |       |       | 100          | 111 |
| S5     | 21   | 7        | Ep         | 40.29  |       | 24.98 | 9.63   |      |       | 22.10 |      |       |      |       |      |    |       |      |       |     |      |       |     |       |      |     |       |       |       |      |       |       | 97           | 110 |
| S5     | 21   | 8        | Feohy +    | 5.04   |       |       | 93.79  |      | 0.74  | 0.43  |      |       |      |       |      |    |       |      |       |     |      |       |     |       |      |     |       |       |       |      |       |       | 100          | 81  |
| S5     | 21   | 9        | Qz + Chl + | 56.17  |       | 18.73 | 15.45  |      | 7.29  |       | 0.40 | 1.96  |      |       |      |    |       |      |       |     |      |       |     |       |      |     |       |       |       |      |       |       | 100          | 109 |
| S5     | 21   | 10       | Grt        | 39.65  |       | 20.87 | 21.71  | 7.90 | 1.11  | 8.77  |      |       |      |       |      |    |       |      |       |     |      |       |     |       |      |     |       |       |       |      |       |       | 100          | 112 |
| S5     | 21   | 11       | Feohy +    | 6.58   |       |       | 91.58  |      | 0.66  | 0.48  |      |       |      |       |      |    |       |      | 0.70  |     |      |       |     |       |      |     |       |       |       |      |       |       | 100          | 80  |
| S5     | 21   | 12       | Spl        |        | 0.37  | 27.54 | 18.59  |      | 14.23 |       |      |       |      |       |      |    |       | 0.36 | 38.91 |     |      |       |     |       |      |     |       |       |       |      |       |       | 100          | 108 |
| S5     | 21   | 13       | Grt        | 40.99  |       | 21.69 | 21.36  | 0.67 | 7.73  | 7.56  |      |       |      |       |      |    |       |      |       |     |      |       |     |       |      |     |       |       |       |      |       |       | 100          | 115 |
| S5     | 21   | 14       | Grt        | 42.02  |       | 23.96 | 22.15  | 0.86 | 8.26  | 2.76  |      |       |      |       |      |    |       |      |       |     |      |       |     |       |      |     |       |       |       |      |       |       | 100          | 126 |
| S5     | 21   | 15       | Grt        | 40.11  |       | 20.94 | 25.54  | 1.27 | 2.62  | 9.52  |      |       |      |       |      |    |       |      |       |     |      |       |     |       |      |     |       |       |       |      |       |       | 100          | 113 |
| S5     | 21   | 16       | Ep         | 40.00  |       | 23.05 | 11.43  |      |       | 22.52 |      |       |      |       |      |    |       |      |       |     |      |       |     |       |      |     |       |       |       |      |       |       | 97           | 112 |
| S5     | 21   | 17       | Garbage    |        |       |       | 3.68   |      |       | 7.41  | 0.85 | 0.50  |      |       |      |    |       |      |       |     |      |       |     |       |      |     |       |       |       |      | 87.56 | 100   | 82           |     |
| S5     | 21   | 18       | Spl        |        |       | 36.23 | 15.06  |      | 16.44 |       |      |       |      |       |      |    |       |      | 32.27 |     |      |       |     |       |      |     |       |       |       |      |       |       | 100          | 111 |
| S5     | 21   | 19       | Garbage    |        | 0.72  |       | 0.48   |      |       | 3.58  | 3.12 |       |      |       |      |    |       |      | 0.72  |     |      |       |     |       |      |     |       |       |       |      |       | 91.39 | 100          | 112 |
| S5     | 22   | 1        | Zrn        | 31.12  |       |       |        |      |       |       |      |       |      |       |      |    |       |      |       |     |      |       |     | 67.32 |      |     |       |       |       | 1.56 |       |       | 100          | 118 |
| S5     | 22   | 2        | Cpy        | 0.17   |       |       | 22.49  |      |       |       |      |       |      | 52.93 |      |    |       |      |       |     |      | 24.40 |     |       |      |     |       |       |       |      |       |       | 100          | 198 |
| S5     | 22   | 3        | Feohy +    | 1.24   | 0.41  |       | 98.35  |      |       |       |      |       |      |       |      |    |       |      |       |     |      |       |     |       |      |     |       |       |       |      |       |       | 100          | 90  |
| S5     | 22   | 4        | Chl        | 29.23  |       | 21.43 | 27.33  |      | 6.21  |       | 0.62 | 0.18  |      |       |      |    |       |      |       |     |      |       |     |       |      |     |       |       |       |      |       |       | 85           | 97  |
| S5     | 22   | 5        | Grt        | 39.89  |       | 20.92 | 30.06  | 0.40 | 2.51  | 6.22  |      |       |      |       |      |    |       |      |       |     |      |       |     |       |      |     |       |       |       |      |       |       | 100          | 113 |
| S5     | 22   | 6        | Spl        |        |       | 27.39 | 16.21  |      | 14.42 |       |      |       |      |       |      |    |       |      | 41.99 |     |      |       |     |       |      |     |       |       |       |      |       |       | 100          | 107 |
| S5     | 22   | 7        | Ep         | 39.86  | 0.58  | 20.47 | 13.87  |      |       | 22.22 |      |       |      |       |      |    |       |      |       |     |      |       |     |       |      |     |       |       |       |      |       |       | 97           | 109 |
| S5     | 22   | 8        | Ep         | 39.17  | 0.37  | 18.66 | 10.52  | 9.59 |       | 18.68 |      |       |      |       |      |    |       |      |       |     |      |       |     |       |      |     |       |       |       |      |       |       | 97           | 111 |
| S5     | 22   | 9        | Grt        | 39.55  |       | 20.65 | 25.11  | 6.53 | 1.12  | 7.05  |      |       |      |       |      |    |       |      |       |     |      |       |     |       |      |     |       |       |       |      |       |       | 100          | 111 |
| S5     | 22   | 10       | Bt         | 34.34  | 1.57  | 16.65 | 30.43  | 0.40 | 4.66  |       |      | 7.95  |      |       |      |    |       |      |       |     |      |       |     |       |      |     |       |       |       |      |       |       | 96           | 84  |
| S5     | 22   | 11       | Garbage    |        |       |       | 3.67   |      |       | 4.60  | 3.38 | 0.43  |      |       | 1.56 |    |       |      |       |     |      |       |     |       |      |     |       |       |       |      |       | 86.36 | 100          | 30  |
| S5     | 22   | 12       | Qz         | 100.00 |       |       |        |      |       |       |      |       |      |       |      |    |       |      |       |     |      |       |     |       |      |     |       |       |       |      |       |       | 100          | 119 |
| S5     | 22   | 13       | TiO2 +     | 0.51   | 88.75 |       | 10.52  |      |       | 0.21  |      |       |      |       |      |    |       |      |       |     |      |       |     |       |      |     |       |       |       |      |       |       | 100          | 103 |
| S5     | 22   | 14       | Grt        | 39.90  |       | 21.28 | 29.31  | 0.70 | 4.47  | 4.35  |      |       |      |       |      |    |       |      |       |     |      |       |     |       |      |     |       |       |       |      |       |       | 100          | 115 |
| S5     | 22   | 15       | Ep         | 39.15  |       | 21.86 | 12.76  |      | 0.59  | 22.64 |      |       |      |       |      |    |       |      |       |     |      |       |     |       |      |     |       |       |       |      |       |       | 97           | 99  |
| S5     | 22   | 16       | TiO2 +     | 1.48   | 95.29 | 0.73  | 1.69   |      |       | 0.36  |      |       |      |       |      |    |       |      | 0.45  |     |      |       |     |       |      |     |       |       |       |      |       |       | 100          | 104 |
| S5     | 22   | 17       | Qz         | 99.79  | 0.21  |       |        |      |       |       |      |       |      |       |      |    |       |      |       |     |      |       |     |       |      |     |       |       |       |      |       |       | 100          | 121 |
| S5     | 22   | 18       | Ep         | 40.31  |       | 26.65 | 7.26   |      |       | 22.79 |      |       |      |       |      |    |       |      |       |     |      |       |     |       |      |     |       |       |       |      |       |       | 97           | 109 |
| S5     | 23   | 1        | Qz         | 100.00 |       |       |        |      |       |       |      |       |      |       |      |    |       |      |       |     |      |       |     |       |      |     |       |       |       |      |       |       | 100          | 117 |
| S5     | 23   | 2        | Ms         | 50.01  |       | 27.21 | 4.38   |      | 2.36  |       | 0.34 | 10.47 |      |       |      |    |       |      | 0.23  |     |      |       |     |       |      |     |       |       |       |      |       |       | 95           | 106 |
| S5     | 23   | 3        | Spl        |        |       | 25.68 | 18.32  |      | 12.90 |       |      |       |      |       |      |    |       | 0.34 | 42.77 |     |      |       |     |       |      |     |       |       |       |      |       |       | 100          | 109 |
| S5     | 23   | 4        | Cpy        | 1.12   |       | 0.55  | 22.38  |      |       |       |      | 0.19  |      | 52.21 |      |    |       |      |       |     |      | 23.56 |     |       |      |     |       |       |       |      |       |       | 100          | 189 |
| S5     | 23   | 5        | Chr        |        |       | 14.84 | 16.61  |      | 12.93 |       |      |       |      |       |      |    |       | 0.52 | 55.09 |     |      |       |     |       |      |     |       |       |       |      |       |       | 100          | 109 |
| S5     | 23   | 6        | Dol        |        |       |       | 3.80   | 0.62 | 17.97 | 31.61 |      |       |      |       |      |    |       |      |       |     |      |       |     |       |      |     |       |       |       |      |       |       | 54           | 57  |
| S5     | 23   | 7        | Spl        |        | 0.49  | 31.84 | 20.57  |      | 14.09 |       |      |       |      |       |      |    |       | 0.49 | 32.19 |     | 0.32 |       |     |       |      |     |       |       |       |      |       |       | 100          | 112 |
| S5     | 23   | 8        | Chl        | 26.06  |       | 21.48 | 22.24  |      | 15.22 |       |      |       |      |       |      |    |       |      |       |     |      |       |     |       |      |     |       |       |       |      |       |       | 85           | 101 |
| S5     | 23   | 9        | Grt        | 39.29  |       | 20.75 | 31.55  | 2.71 | 3.42  | 2.28  |      |       |      |       |      |    |       |      |       |     |      |       |     |       |      |     |       |       |       |      |       |       | 100          | 117 |
| S5     | 23   | 10       | Feohy      |        |       |       | 100.00 |      |       |       |      |       |      |       |      |    |       |      |       |     |      |       |     |       |      |     |       |       |       |      |       |       | 100          | 98  |

Table B2.1: EDS analyses from sample S5.

| Sample | Site                                          | Position | Mineral | SiO2  | TiO2 | Al2O3 | FeO   | MnO  | MgO  | CaO   | Na2O | K2O | P2O5 | SO3 | F | Cl | Sc2O3 | V2O5 | Cr2O3 | CoO | NiO | CuO | ZnO | SrO | ZrO2 | BaO | La2O3 | Ce2O3 | Nd2O3 | HfO2 | WO3 | Total | Actual Total |
|--------|-----------------------------------------------|----------|---------|-------|------|-------|-------|------|------|-------|------|-----|------|-----|---|----|-------|------|-------|-----|-----|-----|-----|-----|------|-----|-------|-------|-------|------|-----|-------|--------------|
| S5     | 23                                            | 11       | Grt     | 39.84 |      | 21.08 | 32.21 | 0.51 | 5.27 | 1.09  |      |     |      |     |   |    |       |      |       |     |     |     |     |     |      |     |       |       |       |      |     | 100   | 115          |
| S5     | 23                                            | 12       | Ep      | 40.67 |      | 28.40 | 5.17  |      |      | 22.76 |      |     |      |     |   |    |       |      |       |     |     |     |     |     |      |     |       |       |       |      |     | 97    | 108          |
| S5     | 23                                            | 13       | Grt     | 40.12 |      | 20.84 | 26.23 | 0.72 | 2.05 | 10.03 |      |     |      |     |   |    |       |      |       |     |     |     |     |     |      |     |       |       |       |      |     | 100   | 112          |
| S5     | 23                                            | 14       | Grt     | 40.20 |      | 21.14 | 26.99 | 0.65 | 6.00 | 4.78  |      |     |      |     |   |    |       |      | 0.24  |     |     |     |     |     |      |     |       |       |       |      |     | 100   | 115          |
|        | Notes                                         |          |         |       |      |       |       |      |      |       |      |     |      |     |   |    |       |      |       |     |     |     |     |     |      |     |       |       |       |      |     |       |              |
|        | " " = indicates that mineral is altered       |          |         |       |      |       |       |      |      |       |      |     |      |     |   |    |       |      |       |     |     |     |     |     |      |     |       |       |       |      |     |       |              |
|        | + = indicates that other minerals are present |          |         |       |      |       |       |      |      |       |      |     |      |     |   |    |       |      |       |     |     |     |     |     |      |     |       |       |       |      |     |       |              |
|        |                                               |          |         |       |      |       |       |      |      |       |      |     |      |     |   |    |       |      |       |     |     |     |     |     |      |     |       |       |       |      |     |       |              |



B3: SEM-BSE images and EDS  
mineral analyses for sample S8.

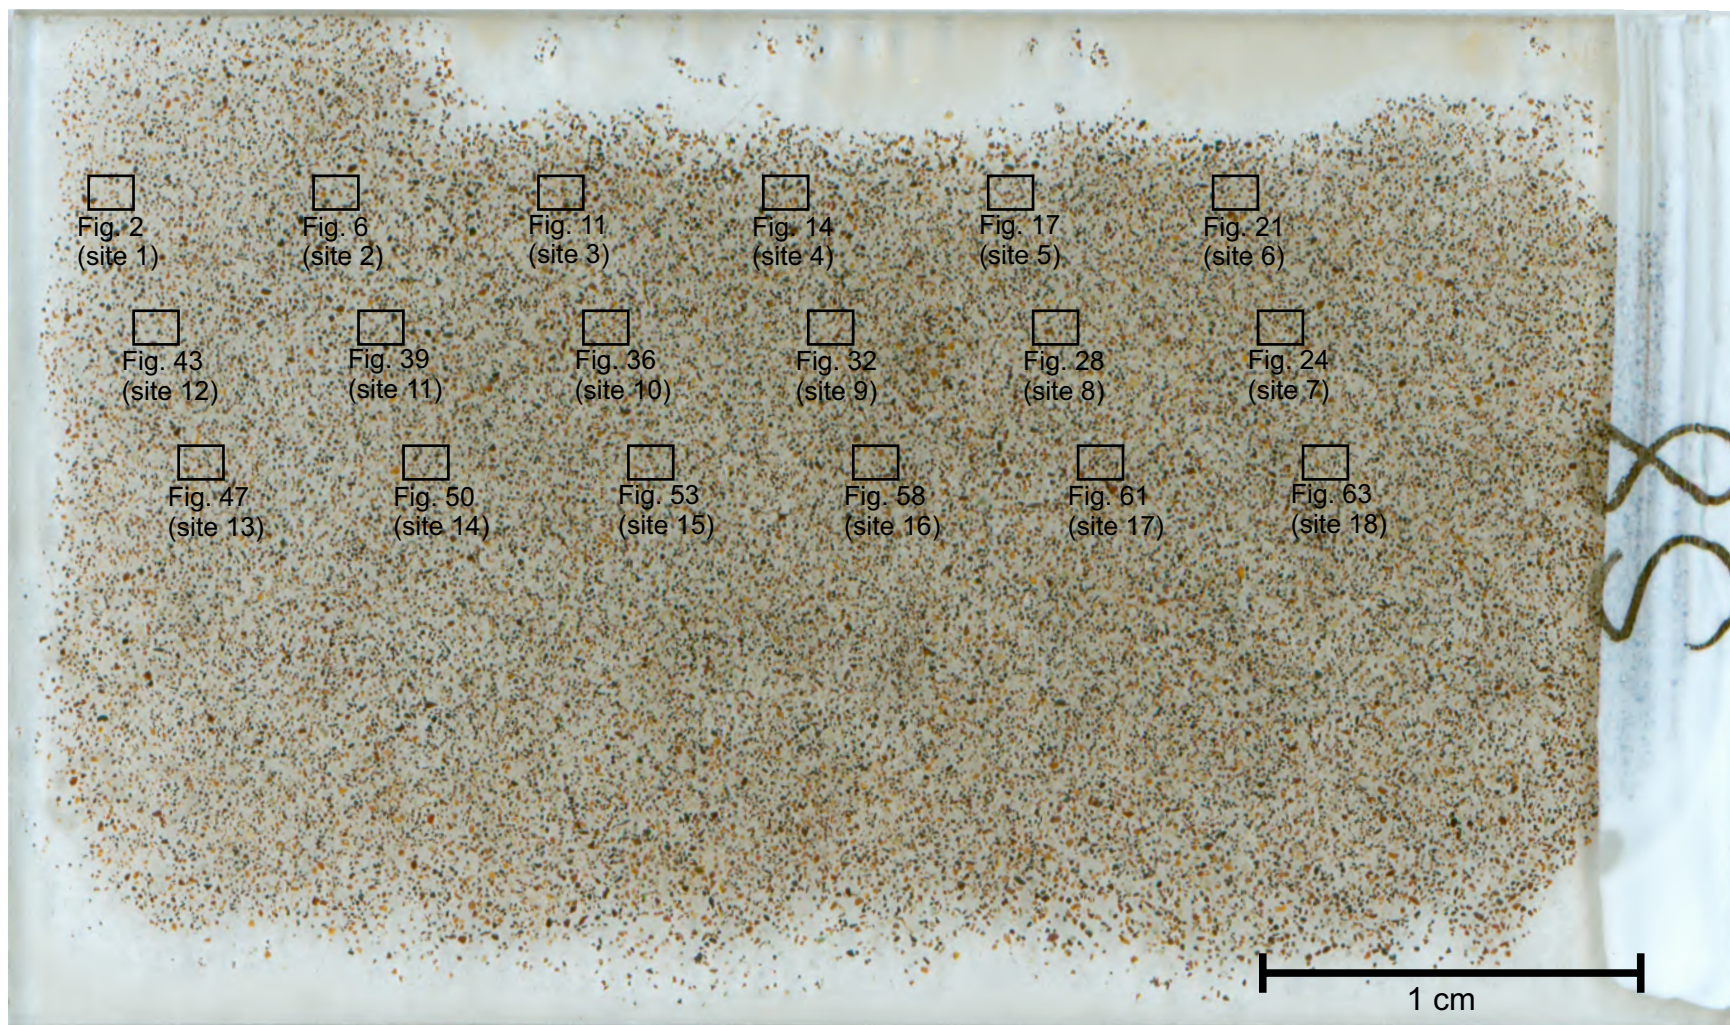

Figure B3.1: Scanned thin section of sample S8 showing the location of the analysed sites. This sample consists of medium sand coming from an overbank deposit.



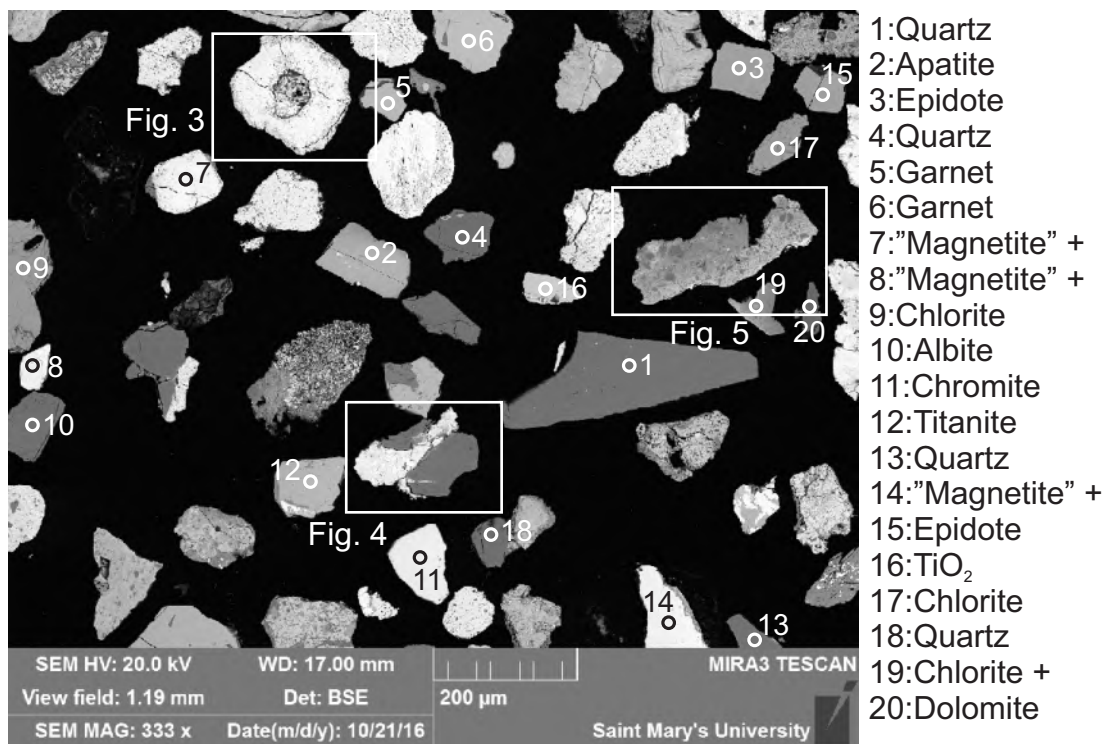

Figure B3.2: Sample S8 site 1 (SEM).

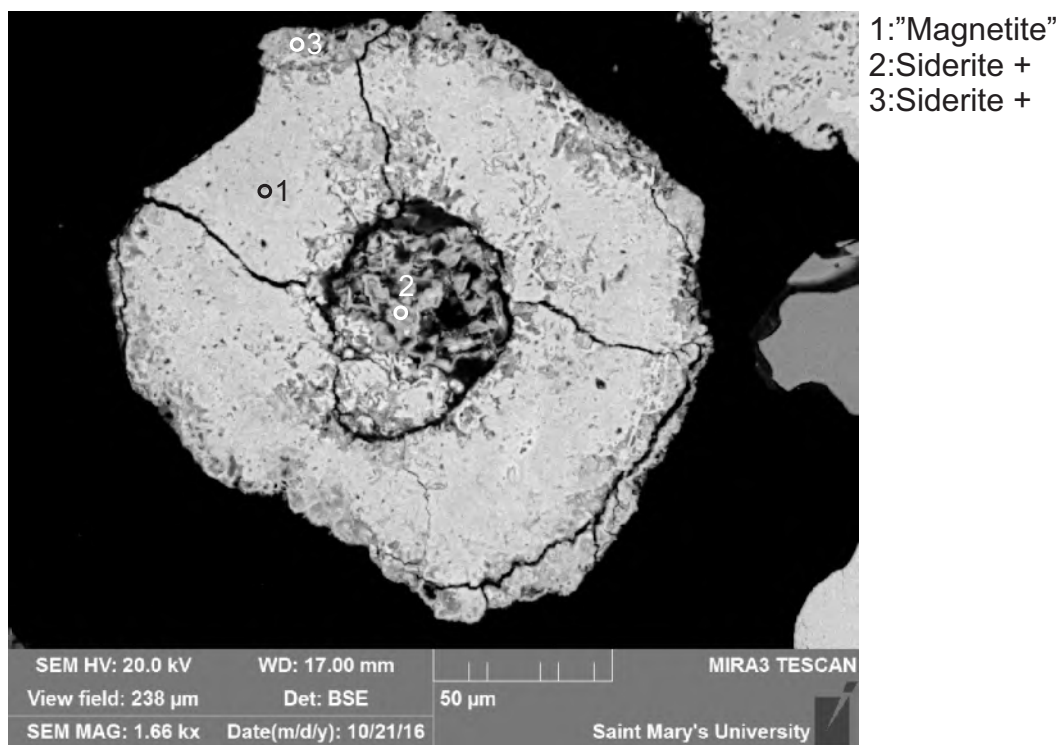

Figure B3.3: Sample S8 site 1.2 (SEM).

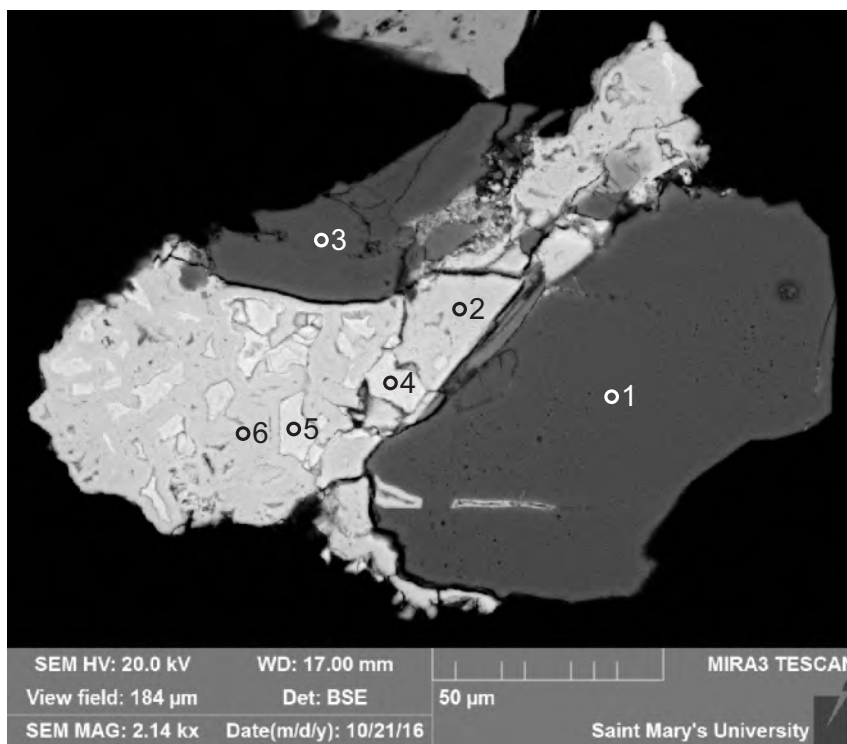

- 1:Quartz
- 2:Fe-oxide/hydroxide +
- 3:Albite
- 4:"Magnetite" +
- 5:"Magnetite" +
- 6:Fe-oxide/hydroxide +

Figure B3.4: Sample S8 site 1.3 (SEM). Lithic clast of quartz, albite, and Fe-oxide/hydroxide (hydrothermal?).

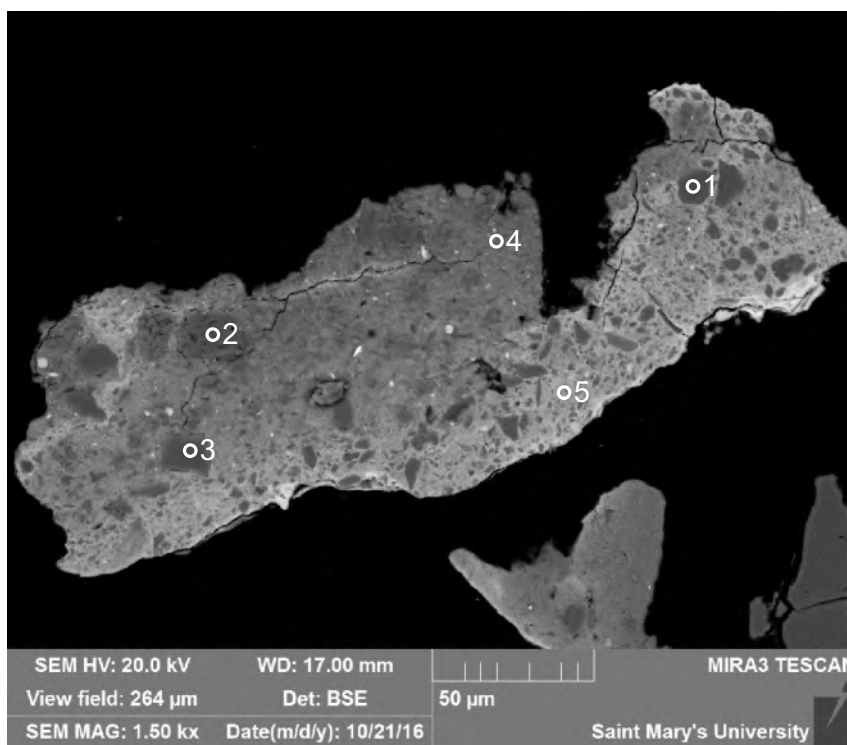

- 1:Quartz
- 2:Quartz
- 3:Quartz
- 4:Chlorite + Illite
- 5:Chlorite +

Figure B3.5: Sample S8 site 1.4 (SEM). Siltstone or altered volcanic lithic clast made up of quartz supported in a chlorite + illite matrix.



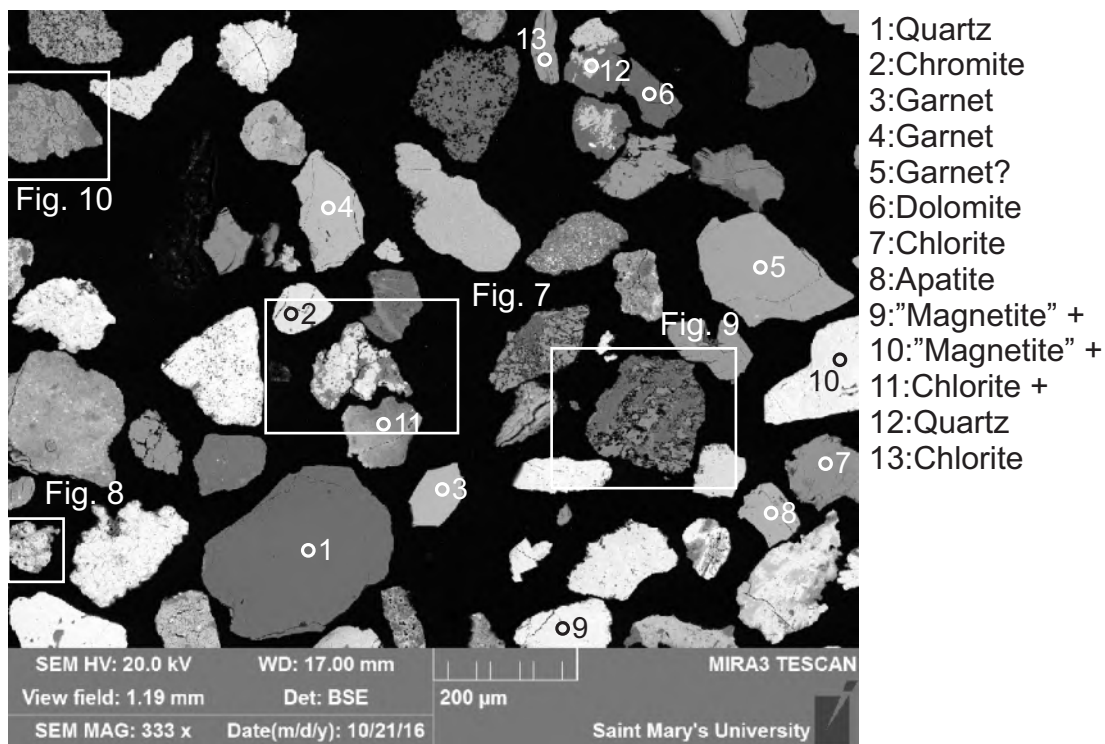

Figure B3.6: Sample S8 site 2 (SEM).

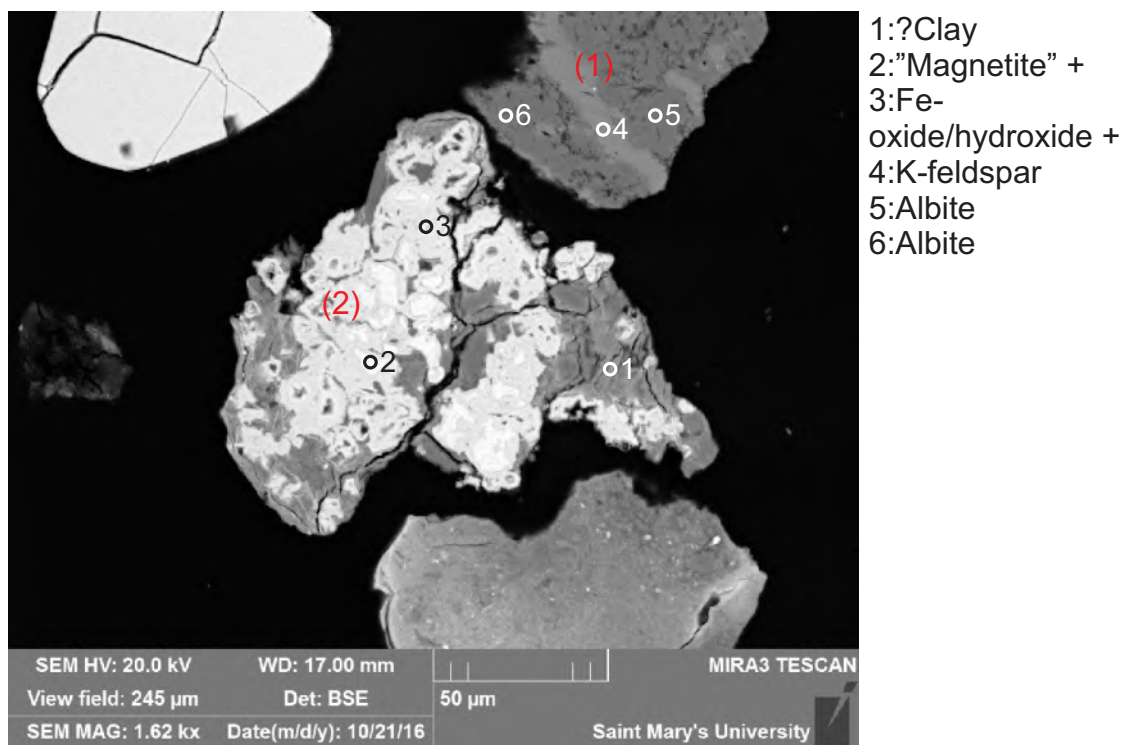

Figure B3.7: Sample S8 site 2.2 (SEM). 1: Granitic lithic clast (albite + K-feldspar). 2: Lithic clast (clay + Fe-oxide/hydroxide, hydrothermal).

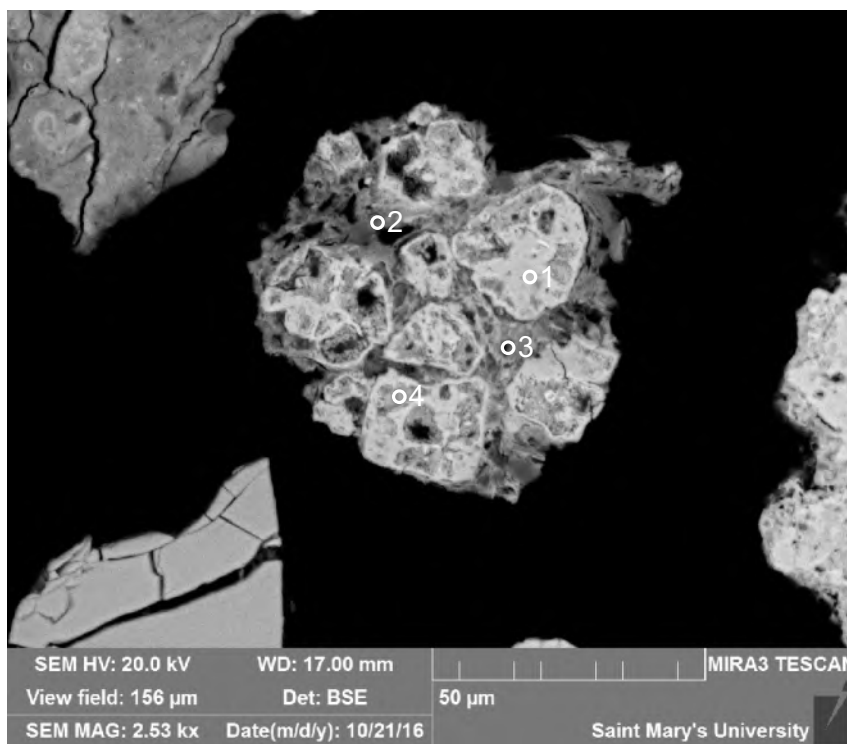

- 1:Fe-oxide/hydroxide +
- 2:Chlorite +
- 3:Chlorite +
- 4:Fe-oxide/hydroxide +

Figure B3.8: Sample S8 site 2.3 (SEM). Lithic clast composed of chlorite, possibly illite, and Fe-oxide/hydroxide, mineralized igneous or pedogenic.

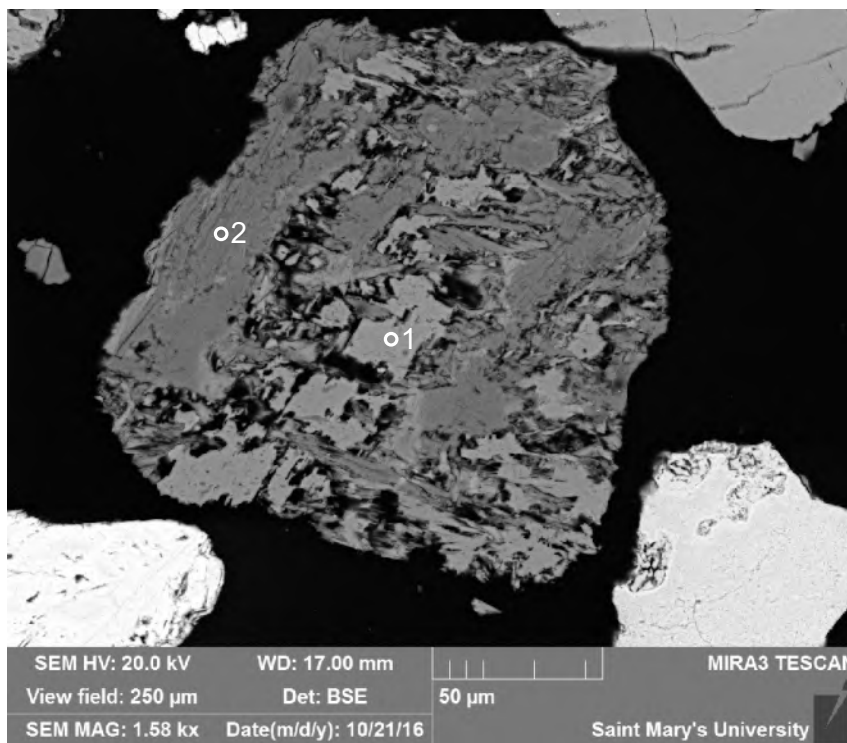

- 1:Epidote
- 2:Albite + Kaolinite

Figure B3.9: Sample S8 site 2.4 (SEM). Lithic clast of epidote + albite (vein probably in ophiolite).

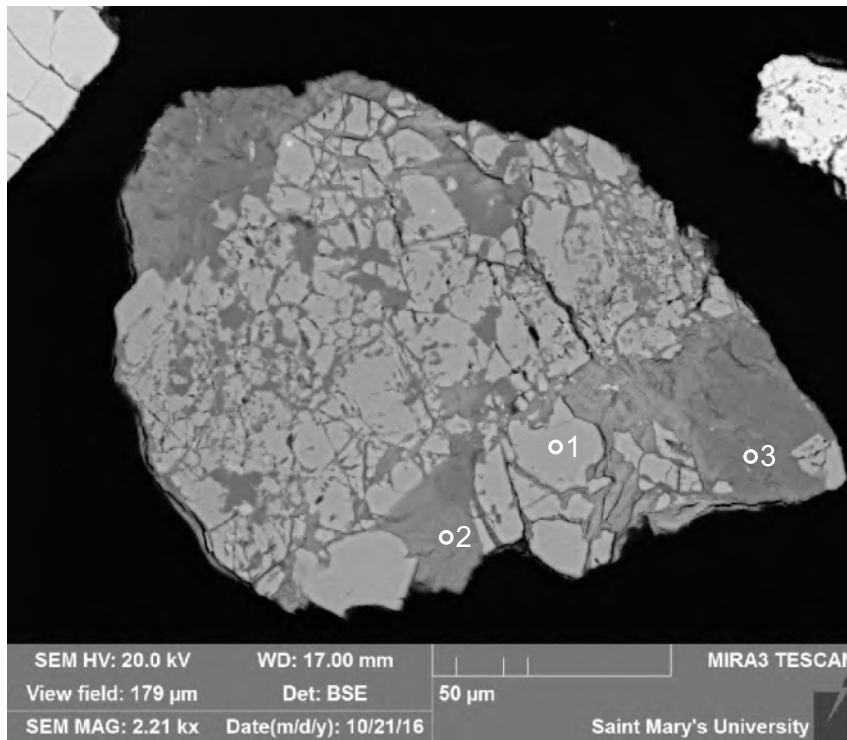

- 1:Epidote
- 2:Chlorite
- 3:Albite

Figure B3.10: Sample S8 site 2.5 (SEM). Lithic clast of epidote + albite + chlorite (epidote-quartz vein probably in ophiolite).

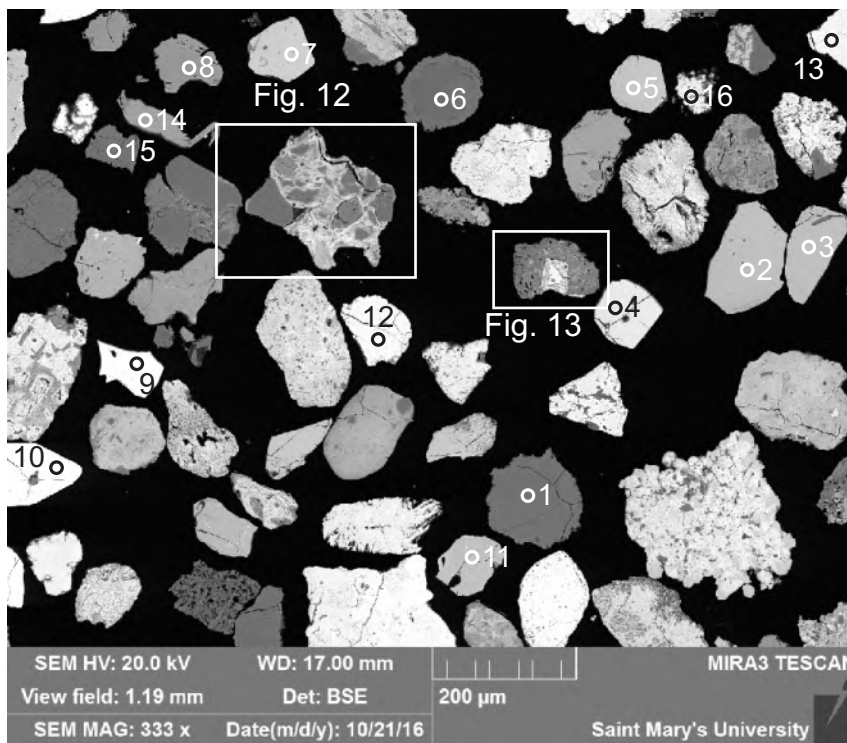

- 1:Quartz
- 2:Spinel
- 3:Garnet
- 4:Chromite
- 5:Spinel
- 6:Quartz
- 7:TiO<sub>2</sub>
- 8:Epidote
- 9:Fe - oxide/hydroxide
- 10:Zircon
- 11:Apatite
- 12:"Magnetite" +
- 13:"Magnetite" +
- 14:Biotite
- 15:Quartz
- 16:"Magnetite" +

Figure B3.11: Sample S8 site 3 (SEM).



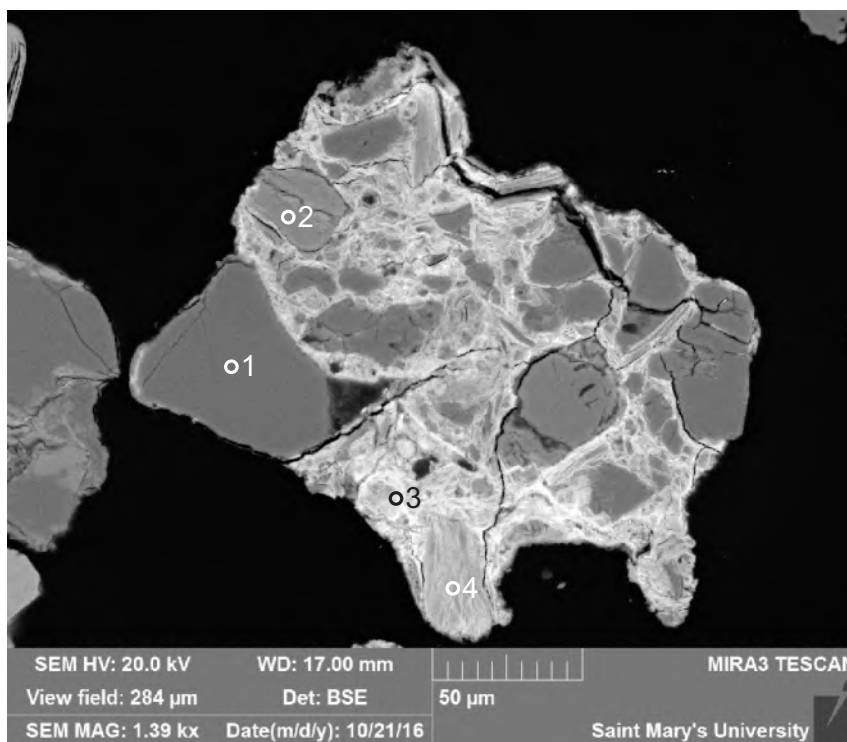

- 1:Quartz
- 2:K-feldspar
- 3:Fe-oxide/hydroxide +
- 4: Chlorite + Fe-oxide/hydroxide

Figure B3.12: Sample S8 site 3.2 (SEM). Siltstone lithic clast composed of subrounded quartz, K-feldspar, chlorite, and Fe-oxide/hydroxide, possibly pedogenic.

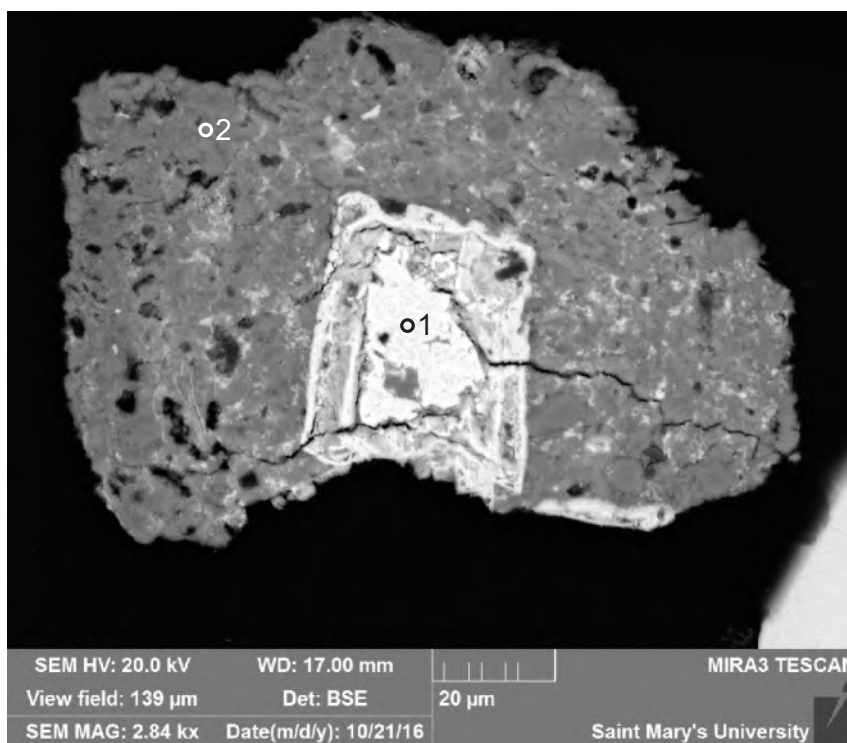

- 1:Fe-oxide/hydroxide +
- 2:Clay

Figure B3.13: Sample S8 site 3.3 (SEM). Pedogenic or mudstone lithic clast.



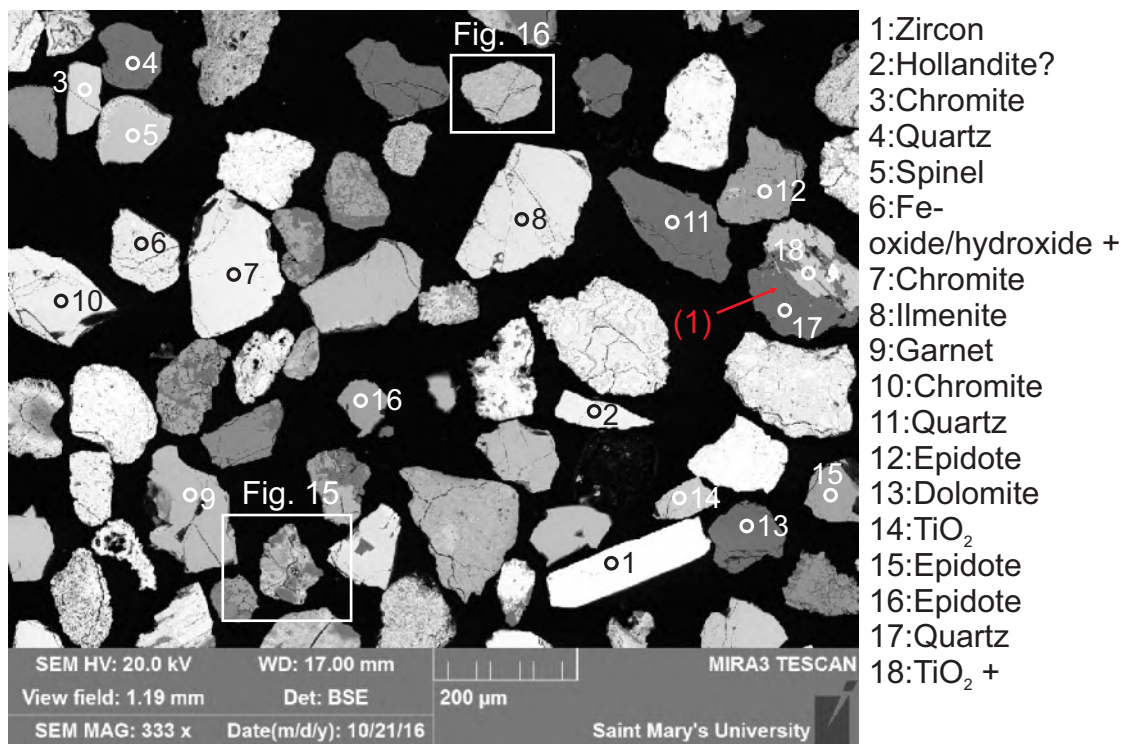

Figure B3.14: Sample S8 site 4 (SEM). 1: Lithic clast of quartz + titania (metamorphic).

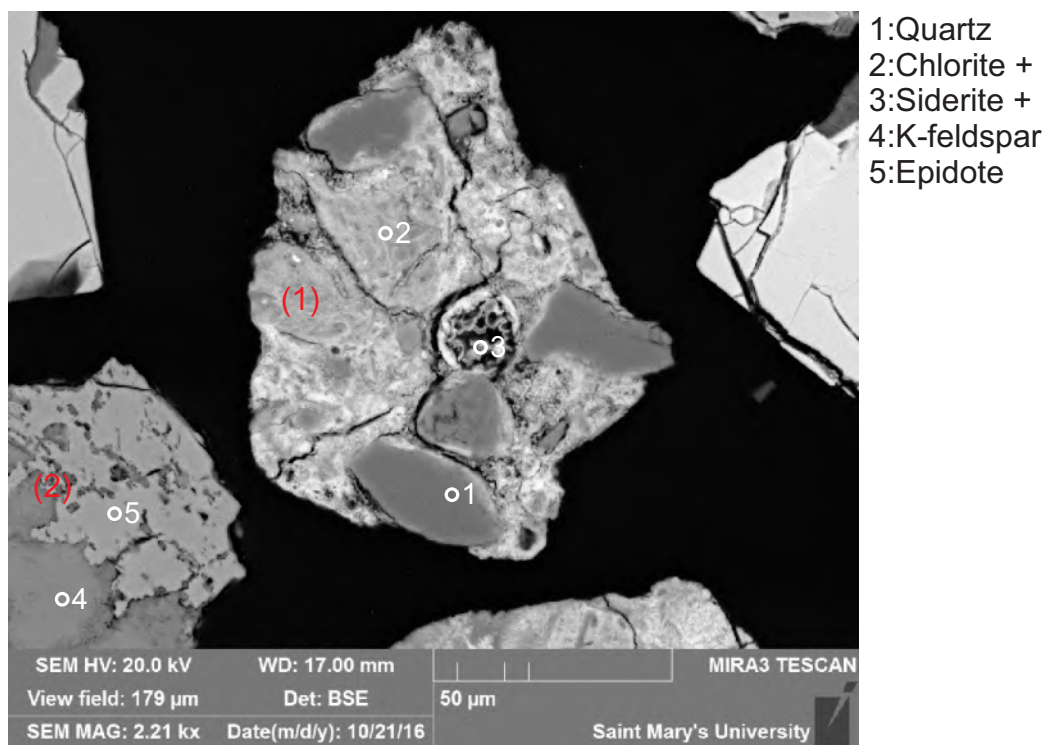

Figure B3.15: Sample S8 site 4.2 (SEM). 1:Siltstone lithic clast (quartz, chlorite, and siderite). 2: Lithic clast (epidote and K-feldspar, epidotized felsic igneous or hydrothermal).

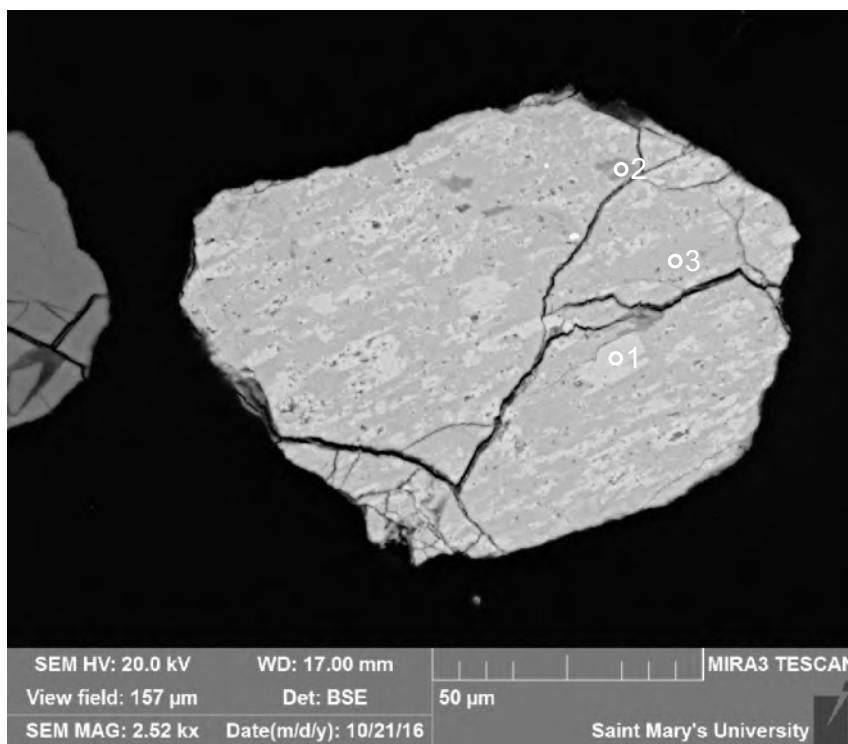

1:TiO<sub>2</sub> +  
2: ?Garnet  
3: Titanite

Figure B3.16: Sample S8 site 4.3 (SEM). Lithic clast of titanite, titania, and ?garnet (metamorphic).

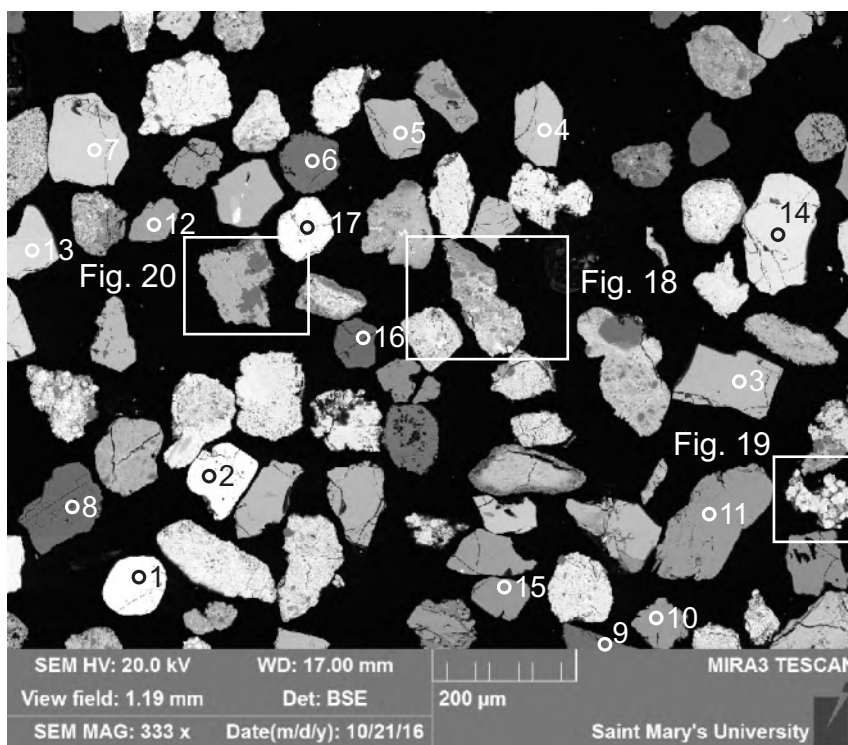

1:Zircon  
2:Zircon  
3:Garnet  
3: Titanite  
4:Chromite  
5:Spinel  
6:Quartz  
7:Chromite  
8:Dolomite  
9:Quartz  
10:Epidote  
11:Chlorite  
12:Epidote  
13:Chromite  
14:Chromite  
15:Epidote  
16:Dolomite  
17:Fe-oxide/hydroxide +

Figure B3.17: Sample S8 site 5 (SEM).

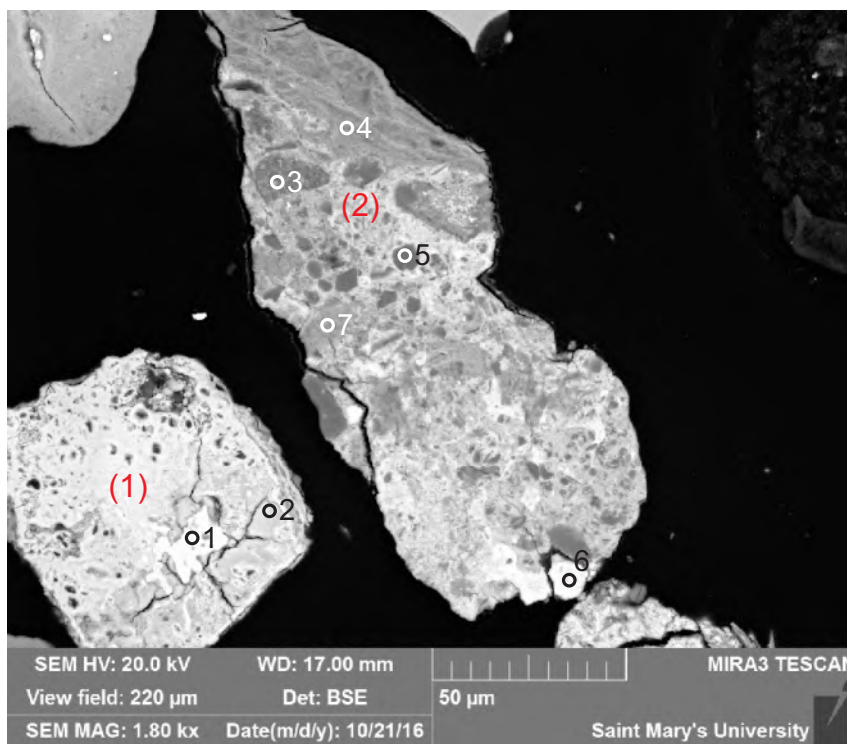

- 1:"Magnetite"
- 2:Fe-oxide/hydroxide +
- 3:Quartz +
- 4:?Chlorite
- 5:Quartz +
- 6:Mn - Oxide/hydroxide +
- 7: Mn-oxide/hydroxide/Fe-oxide/hydroxide +

Figure B3.18: Sample S8 site 5.2 (SEM). 1: Altered grain of magnetite (1,2). 2: Siltstone or altered volcanic lithic clast composed of quartz, chlorite, and Mn- Fe-oxide/hydroxide.

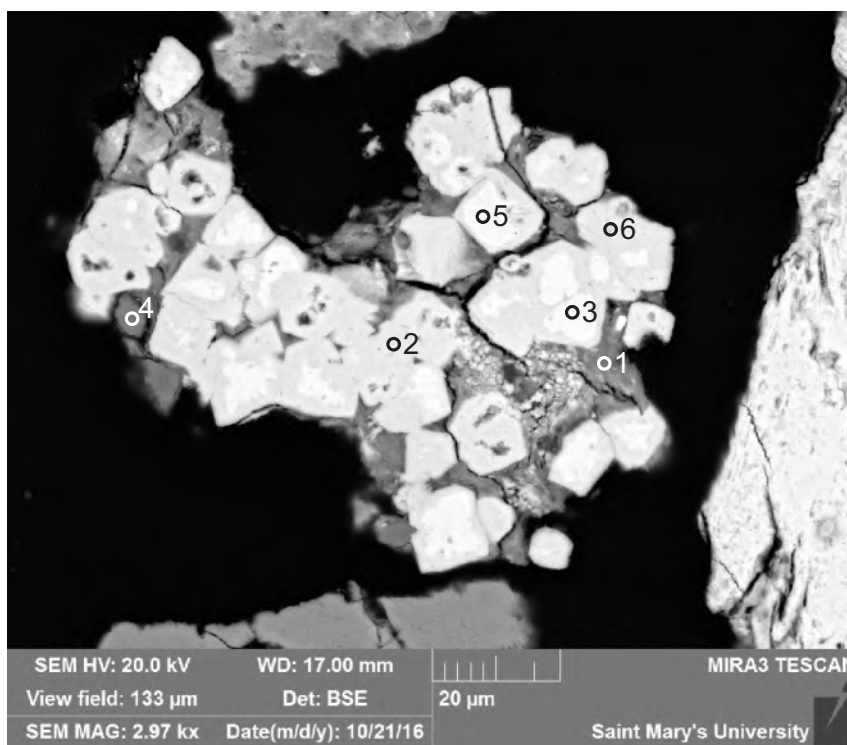

- 1:?Clay
- 2:Fe-oxide/hydroxide +
- 3:"Magnetite" +
- 4:Quartz +
- 5:"Magnetite" +
- 6:Fe-oxide/hydroxide +

Figure B3.19: Sample S8 site 5.3 (SEM). Aggregate (clay, quartz, Fe-oxide/hydroxide, pedogenic cementation of detrital magnetite).



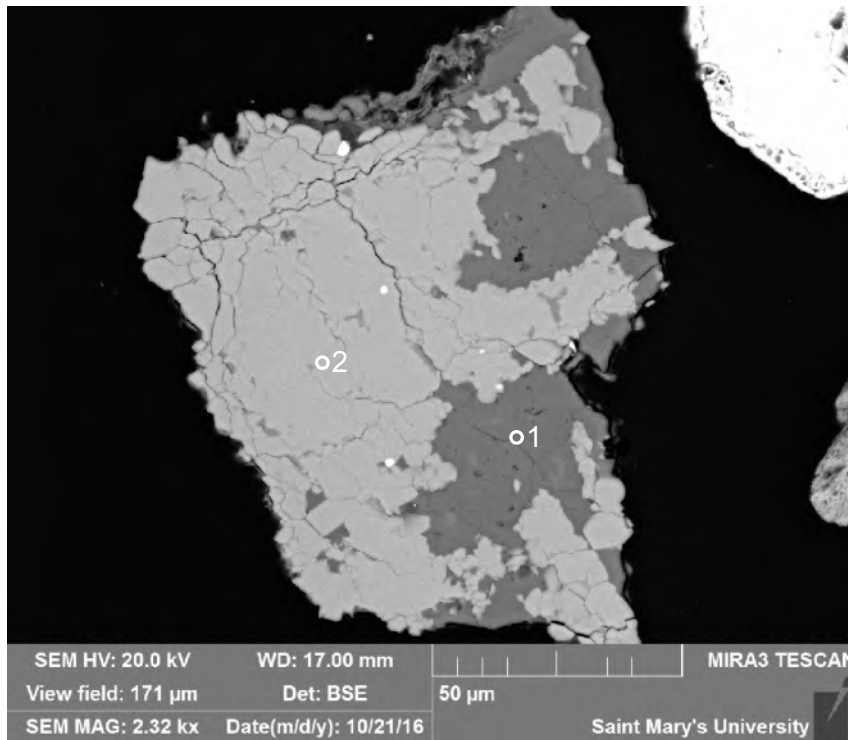

- 1:Albite
- 2:Titanite

Figure B3.20: Sample S8 site 5.4 (SEM). Lithic clast (albite + titanite, metamorphic).

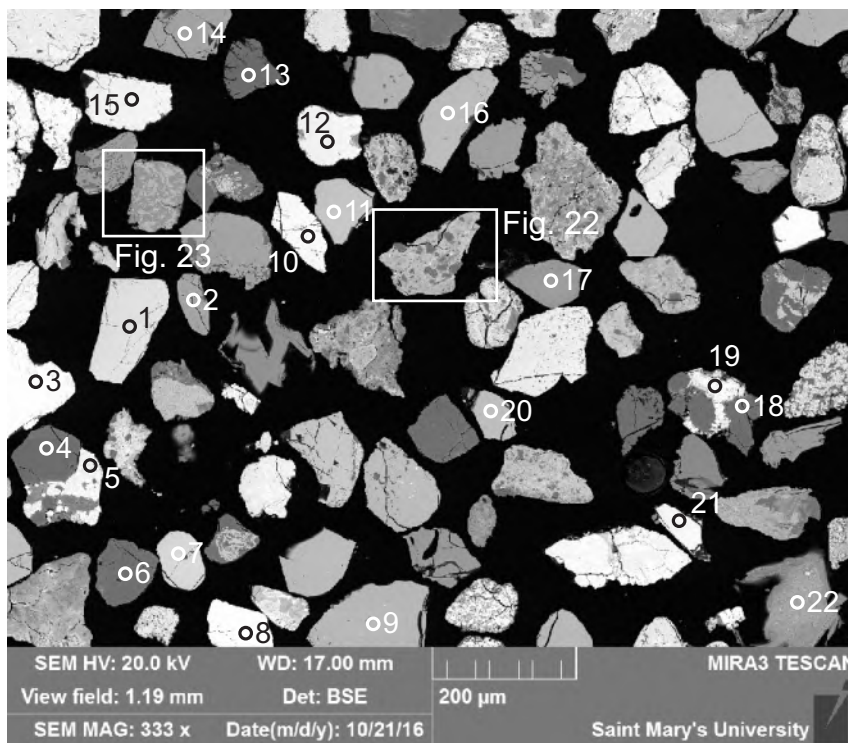

- 1:Chromite
- 2:Hornblende
- 3:Ilmenite
- 4:Quartz
- 5:Pyrite +
- 6:Quartz +
- 7:Spinel
- 8:"Magnetite"
- 9:Garnet
- 10:Ilmenite
- 11:Epidote
- 12:"Magnetite" +
- 13:Dolomite
- 14:Epidote
- 15:"Magnetite" +
- 16:Garnet
- 17:Apatite
- 18:Quartz
- 19:Pyrite +
- 20:Garnet
- 21:Ilmenite
- 22:Chlorite +

Figure B3.21: Sample S8 site 6 (SEM). Lithic clasts consisting of pyrite (5, 19) and quartz (4, 18) (pyrite cemented sandstone).



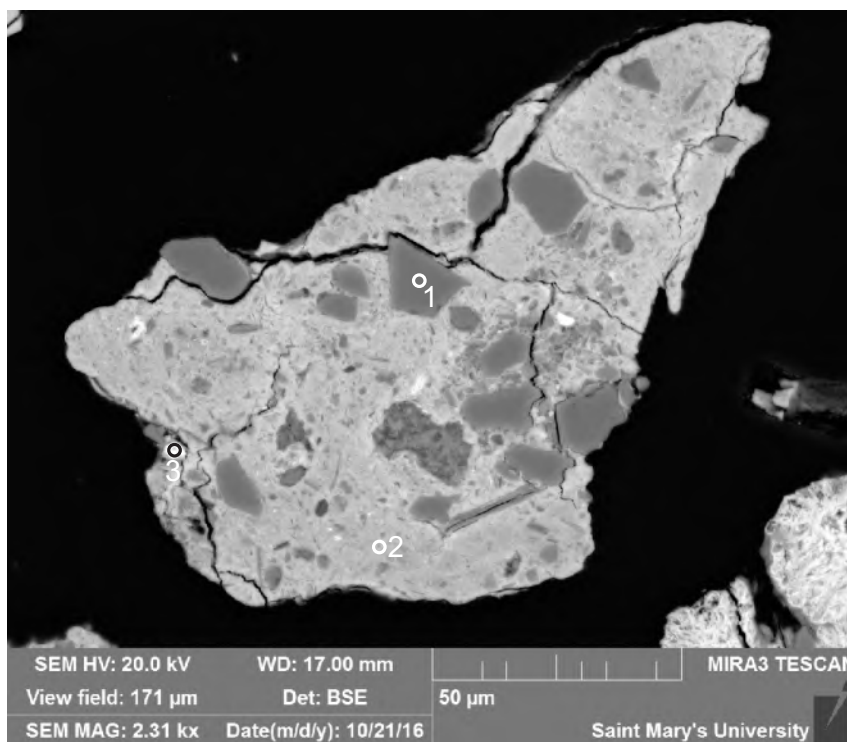

- 1:Quartz
- 2:Chlorite +
- 3:"Ilmenite" +

Figure B3.22: Sample S8 site 6.2 (SEM). Siltstone or altered volcanic lithic clast of quartz, chlorite, and ilmenite.

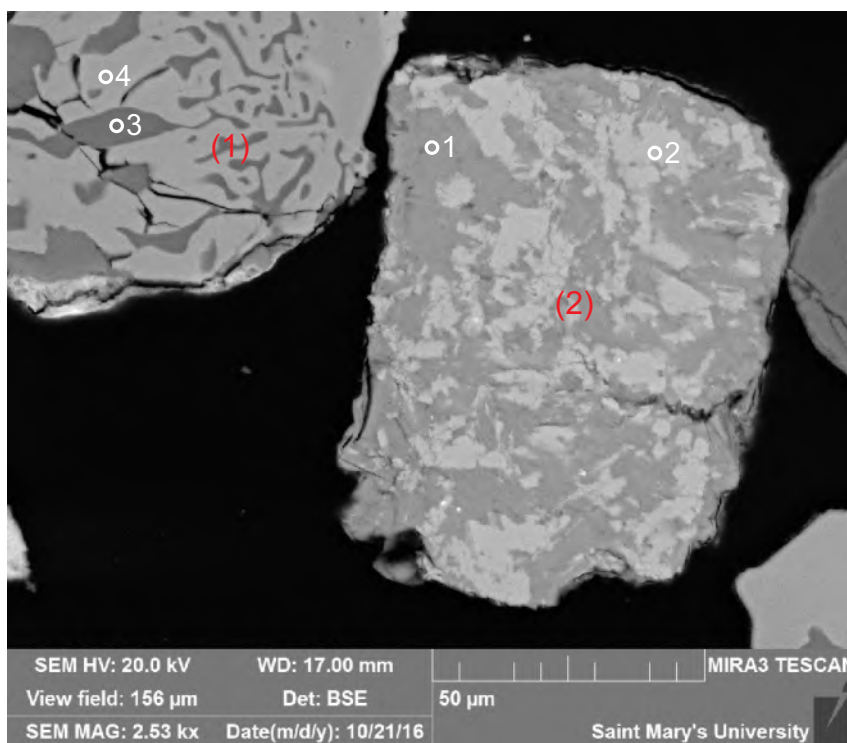

- 1:Chlorite
- 2:Titanite
- 3:Quartz +
- 4:Epidote

Figure B3.23: Sample S8 site 6.3 (SEM). 1: Hydrothermal clast of epidote and quartz (vein). 2: Lithic clast of titanite and chlorite (metamorphic).

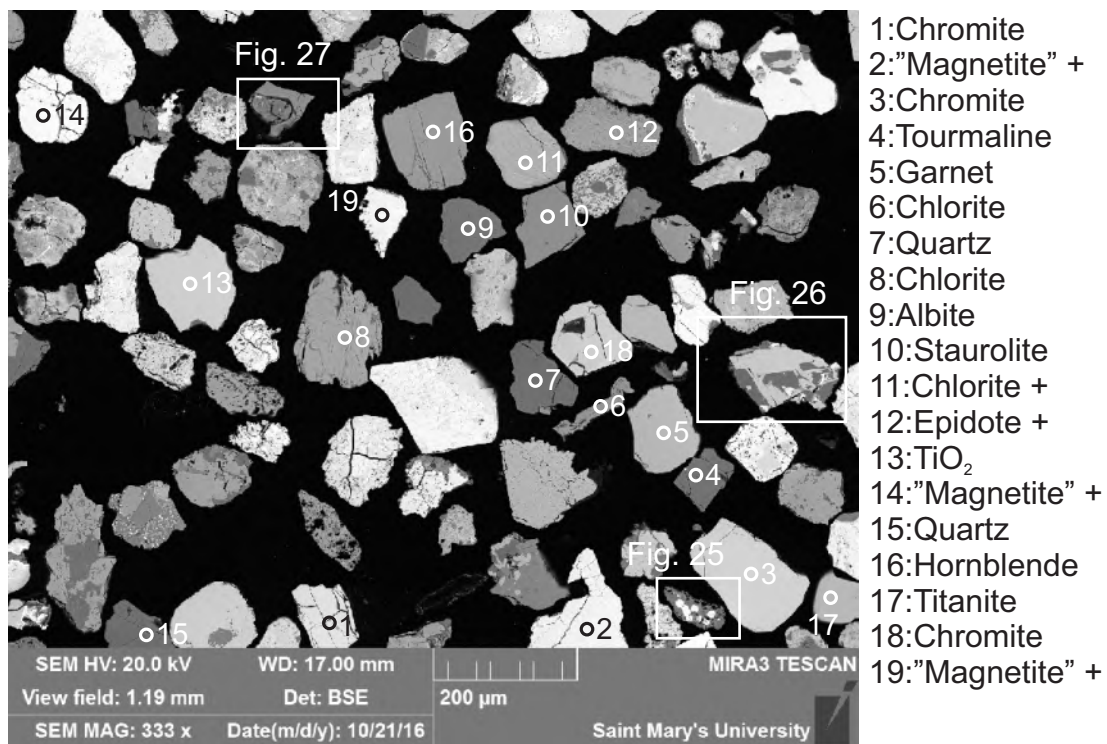

Figure B3.24: Sample S8 site 7 (SEM).

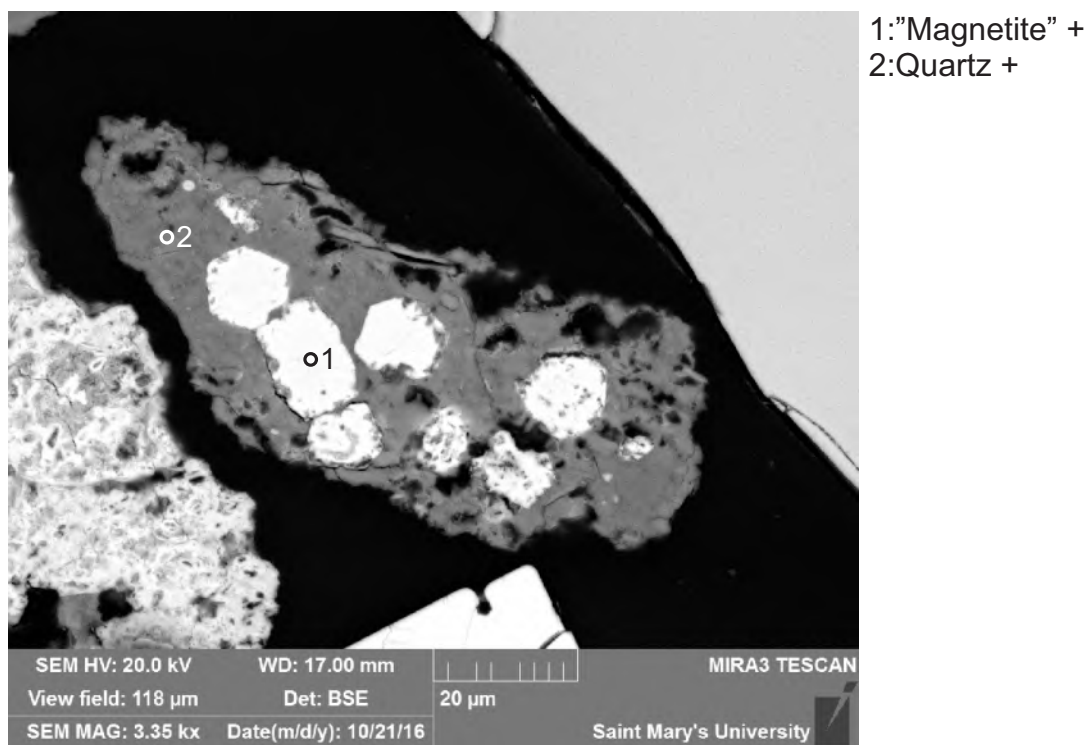

Figure B3.25: Sample S8 site 7.2 (SEM). Lithic clast of magnetite + quartz (hydrothermal vein).

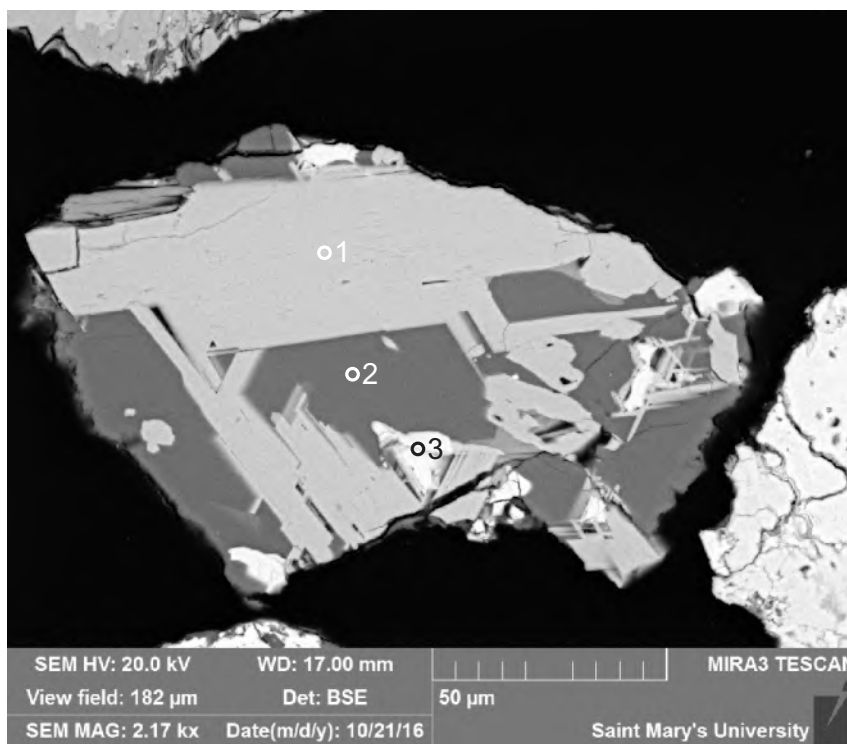

1:TiO<sub>2</sub>  
2:Quartz +  
3:"Ilmenite"

Figure B3.26: Sample S8 site 7.3 (SEM). Lithic clast of quartz, titania, and ilmenite (metamorphic).

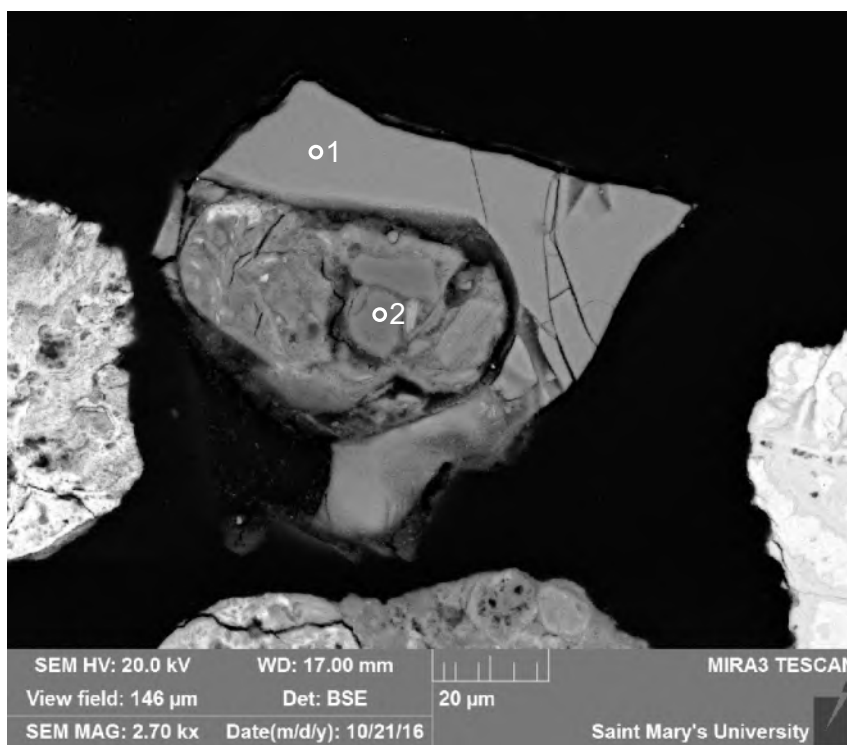

1:Staurolite  
2:Quartz

Figure B3.27: Sample S8 site 7.4 (SEM). Lithic clast of staurolite and quartz (metamorphic).

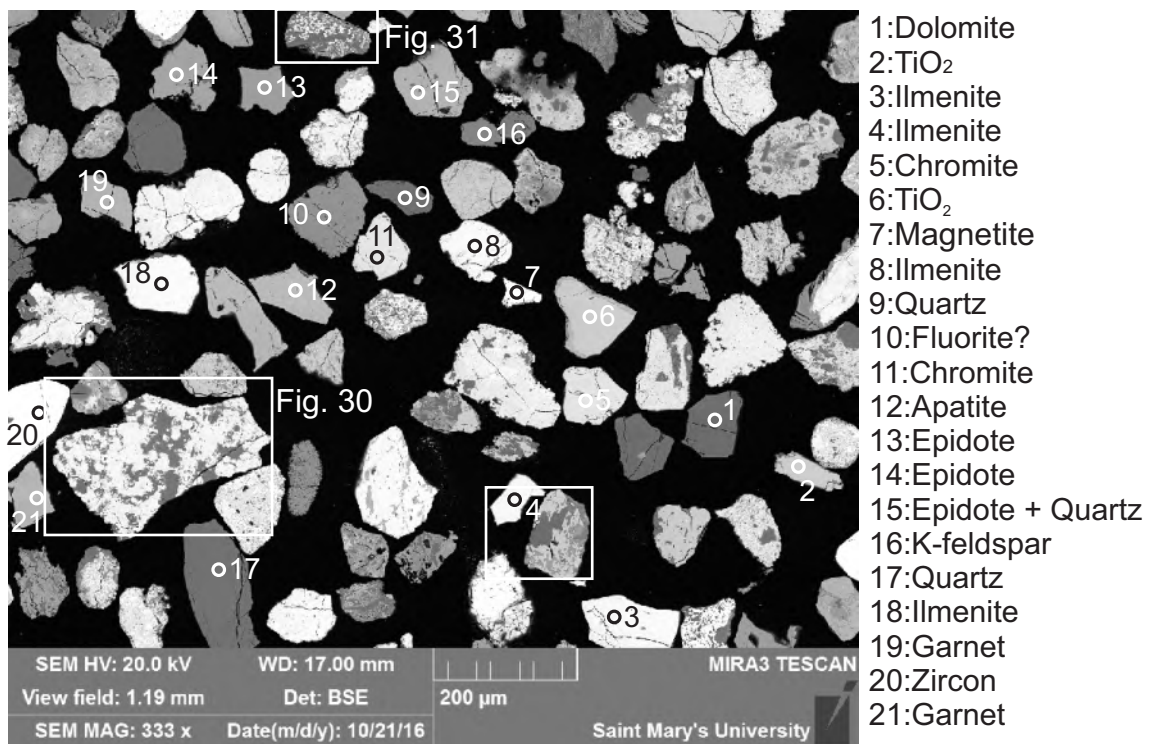

Figure B3.28: Sample S8 site 8 (SEM).

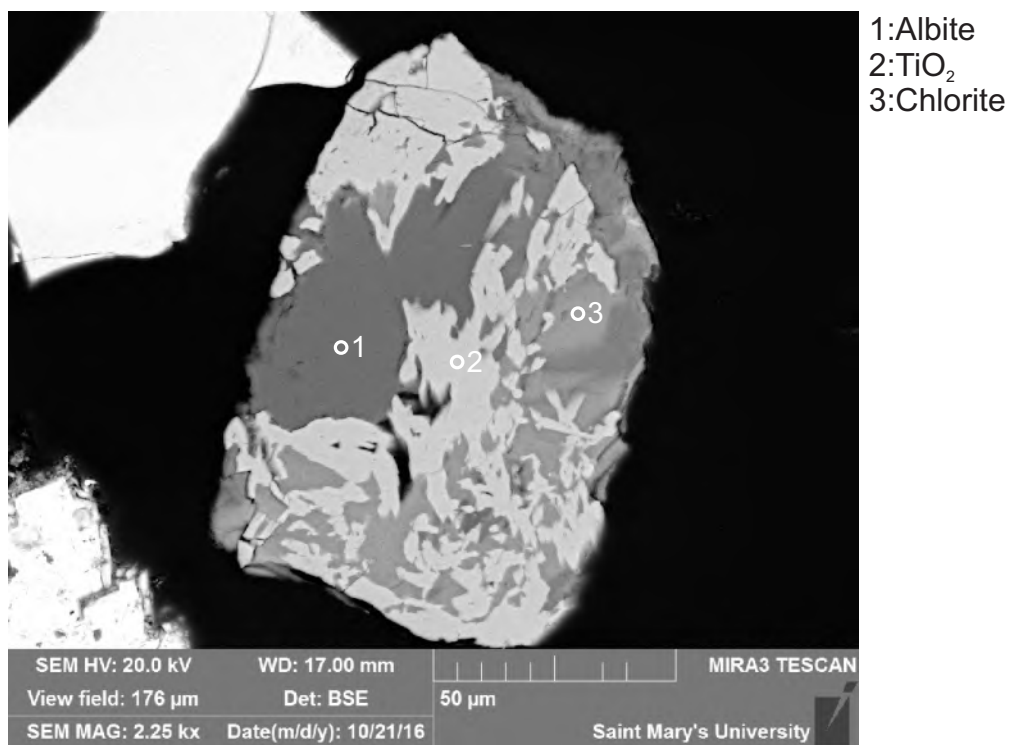

Figure B3.29: Sample S8 site 8.2 (SEM). Lithic clast of albite, chlorite, titania (metamorphic).



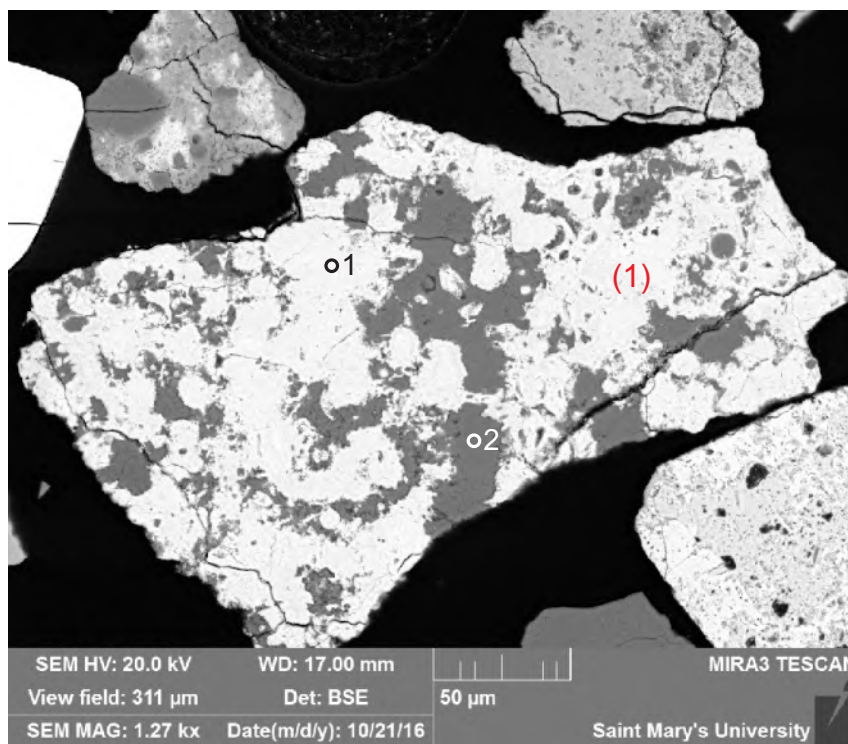

1:"Magnetite" +  
2:Quartz

Figure B3.30: Sample S8 site 8.3 (SEM). 1: Lithic clast of quartz and magnetite (hydrothermal vein).

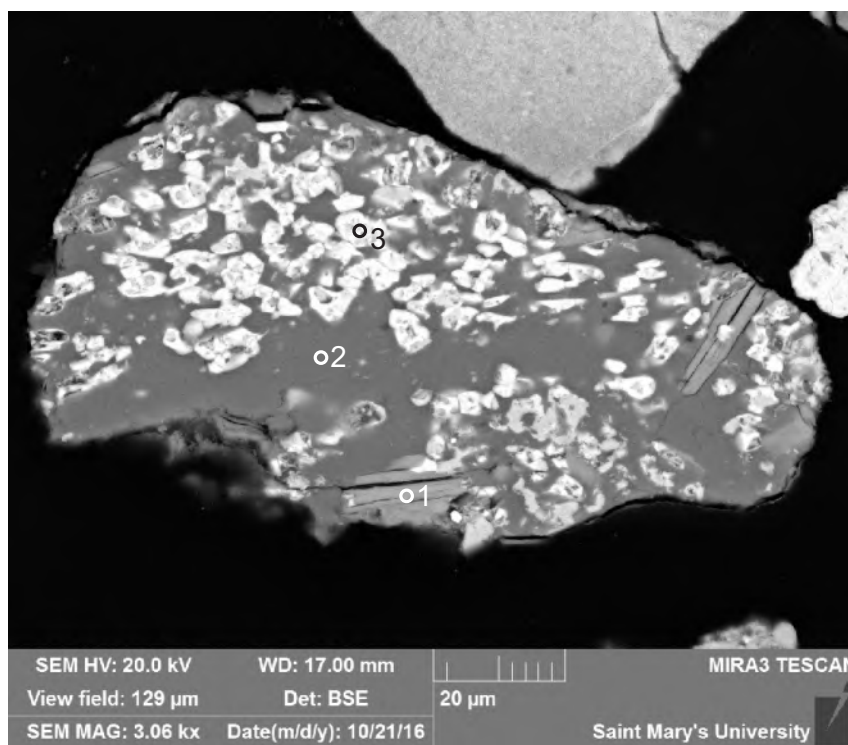

1:"Biotite"  
2:Quartz  
3:"Ilmenite"

Figure B3.31: Sample S8 site 8.4 (SEM). Lithic clast of altered biotite + quartz + ilmenite (metamorphic).

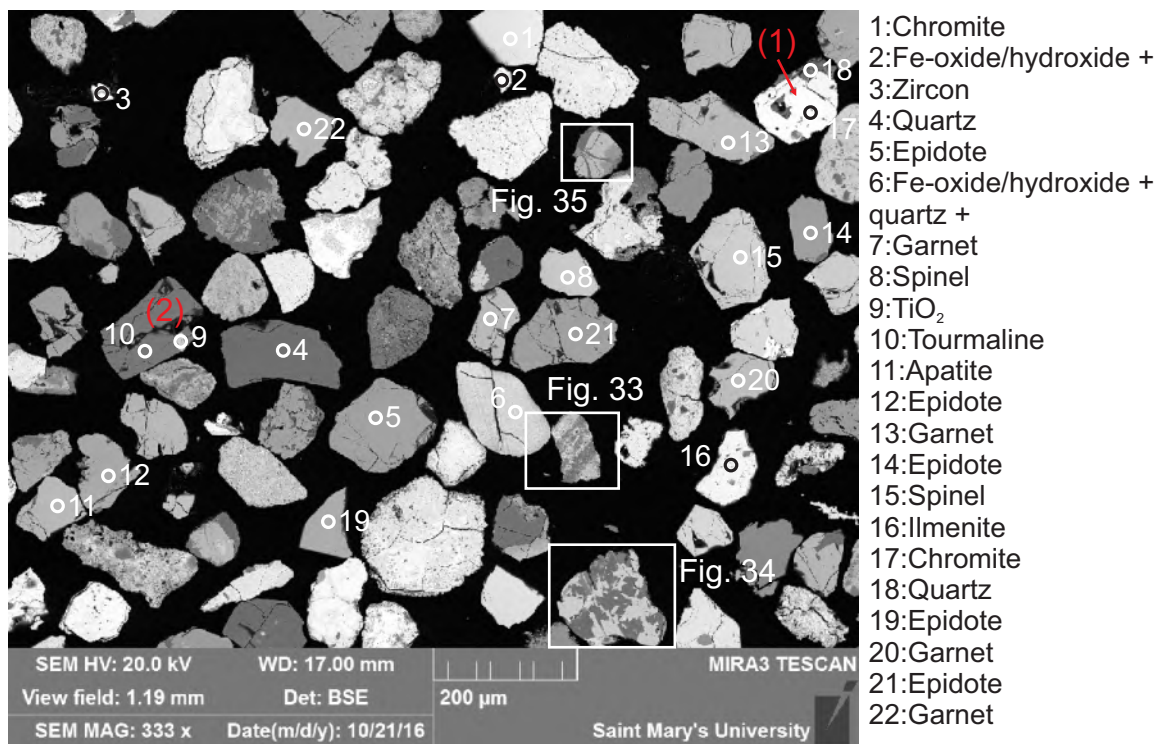

Figure B3.32: Sample S8 site 9 (SEM). 1: Lithic clast (chromite + quartz, sandstone). 2: Lithic clast (titania + tourmaline, metamorphic).

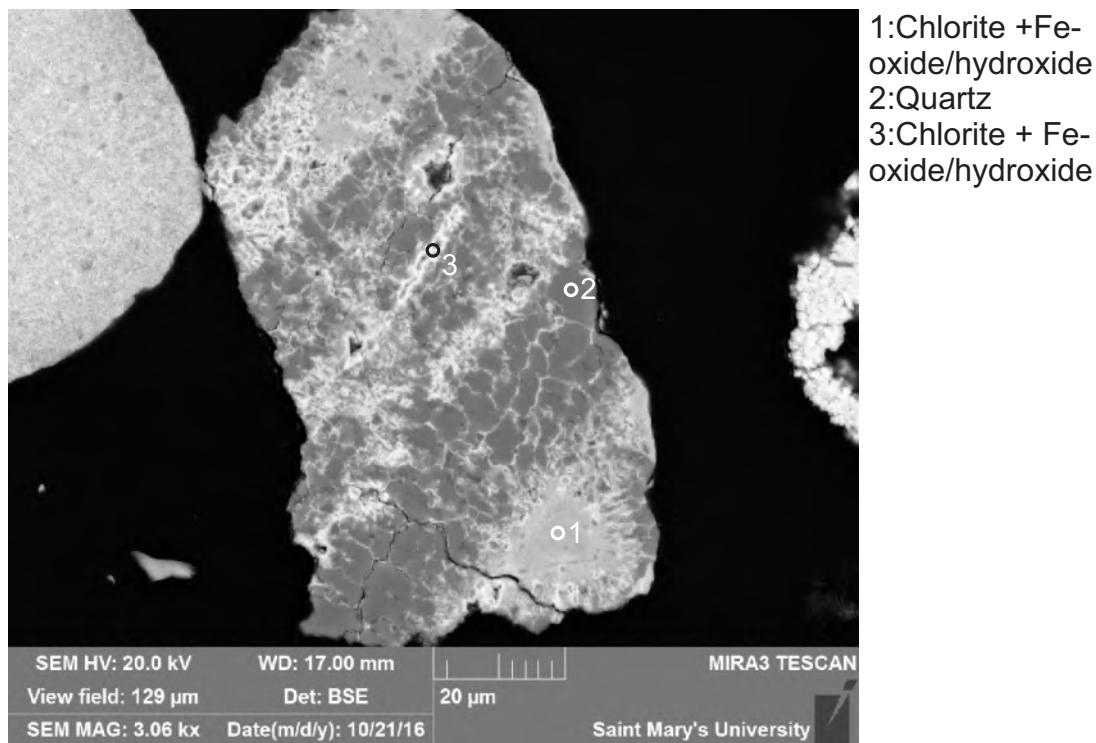

Figure B3.33: Sample S8 site 9.2 (SEM). Laminated siltstone lithic clast (quartz + chlorite + Feoxide/hydroxide).

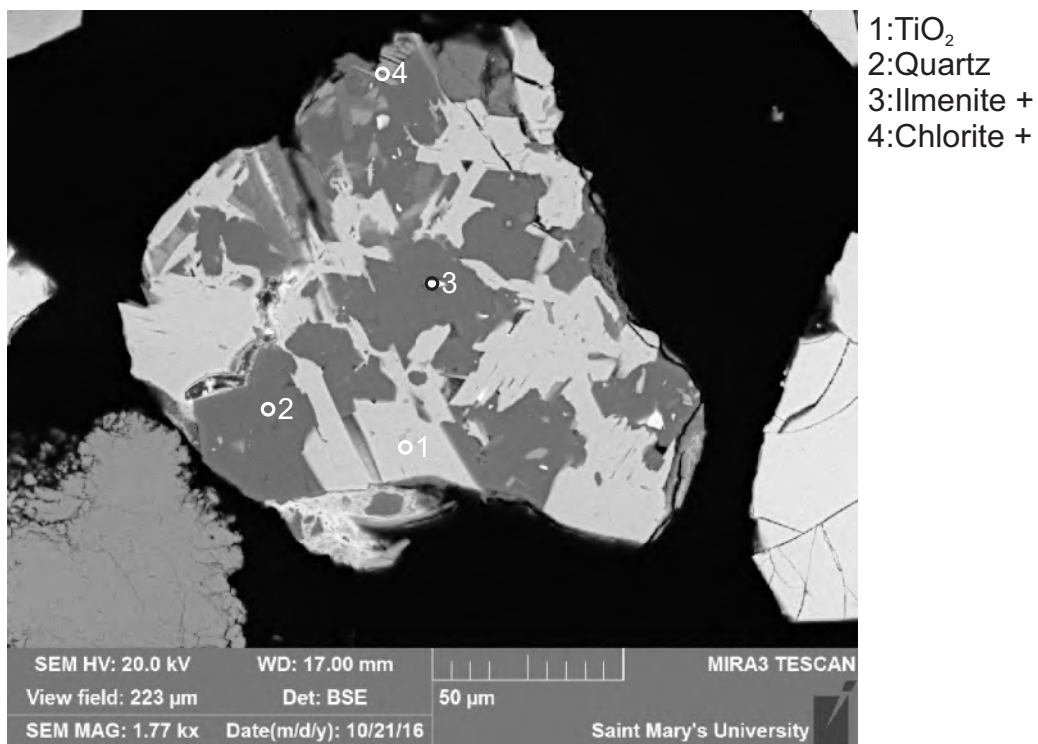

Figure B3.34: Sample S8 site 9.3 (SEM). Lithic clast composed of quartz, titanite, chlorite, and ilmenite (metamorphic).

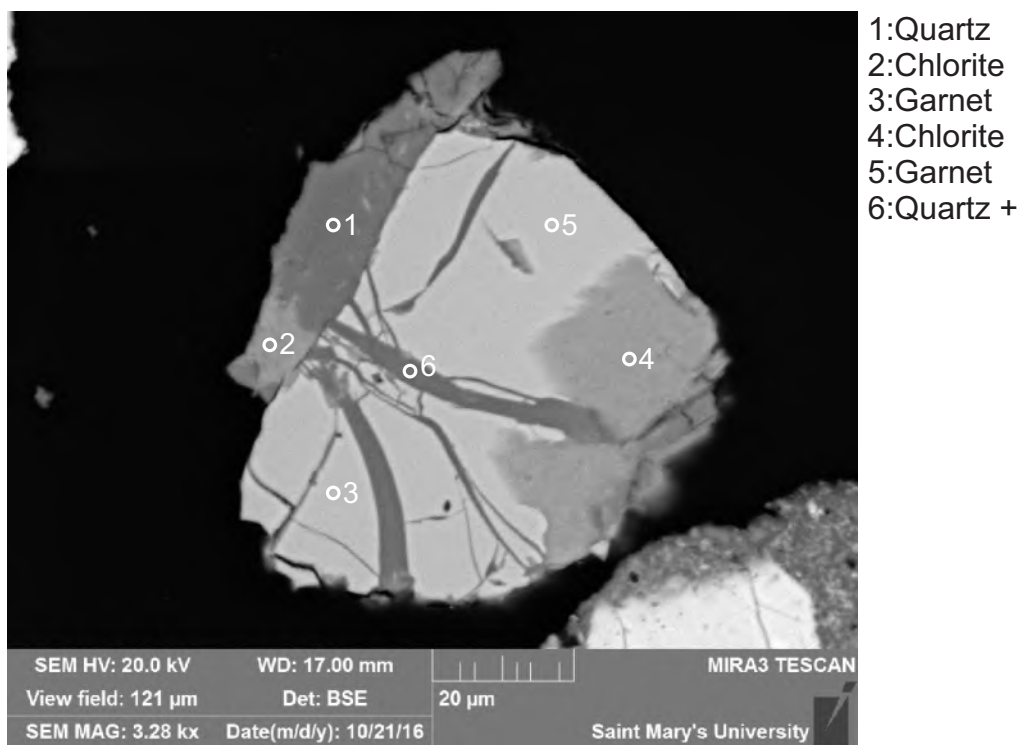

Figure B3.35: Sample S8 site 9.4 (SEM). Lithic clast composed of quartz, chlorite, and garnet (metamorphic with hydrothermal quartz veins).



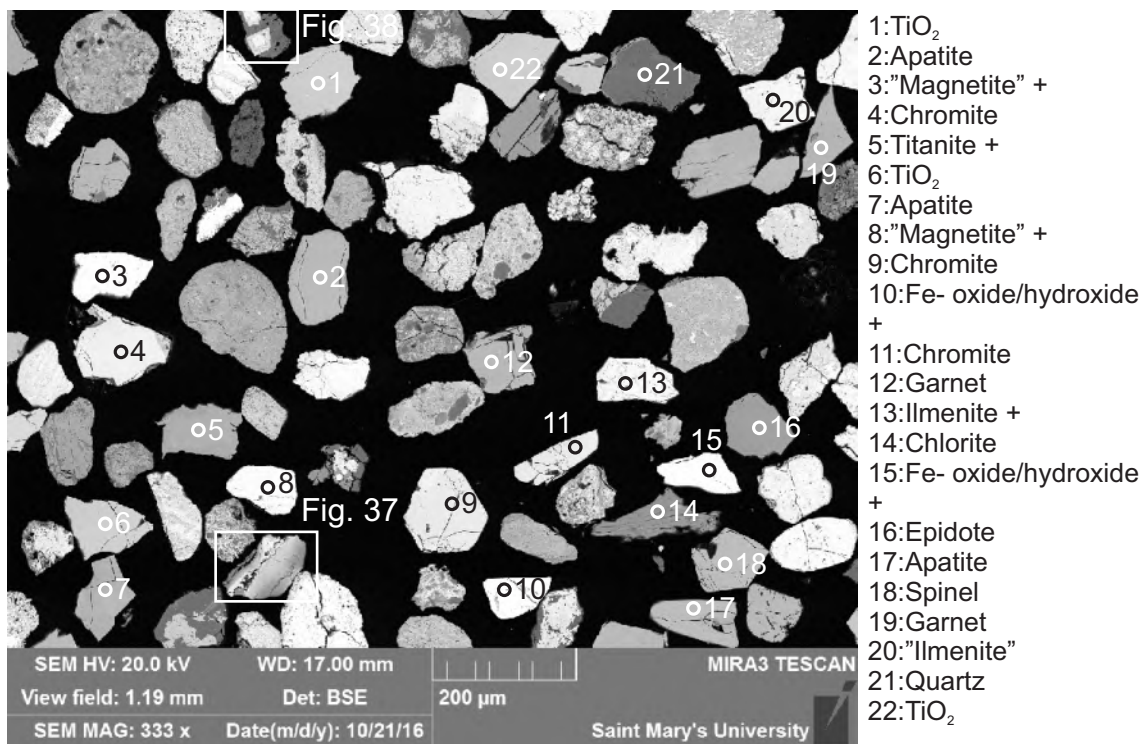

Figure B3.36: Sample S8 site 10 (SEM).

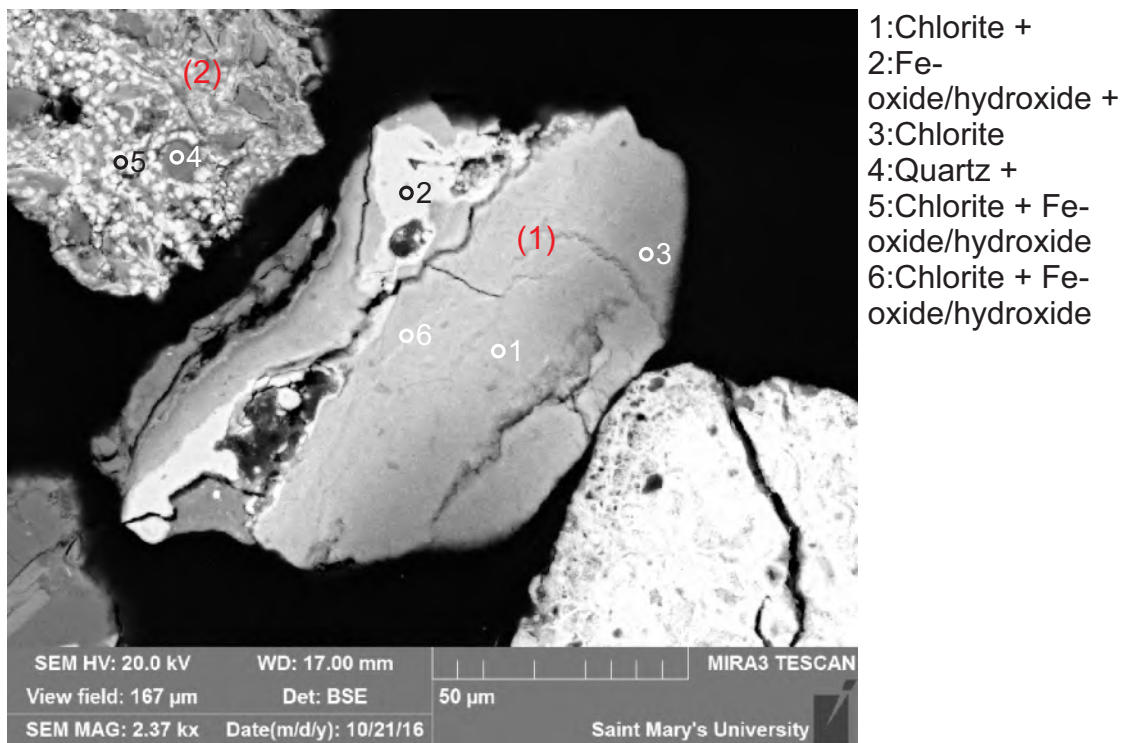

Figure B3.37: Sample S8 site 10.2 (SEM). 1: Lithic clast principally of chlorite (metamorphic or hydrothermal). 2: Pedogenic aggregate or siltstone of quartz, Fe-oxide/hydroxide, and chlorite.



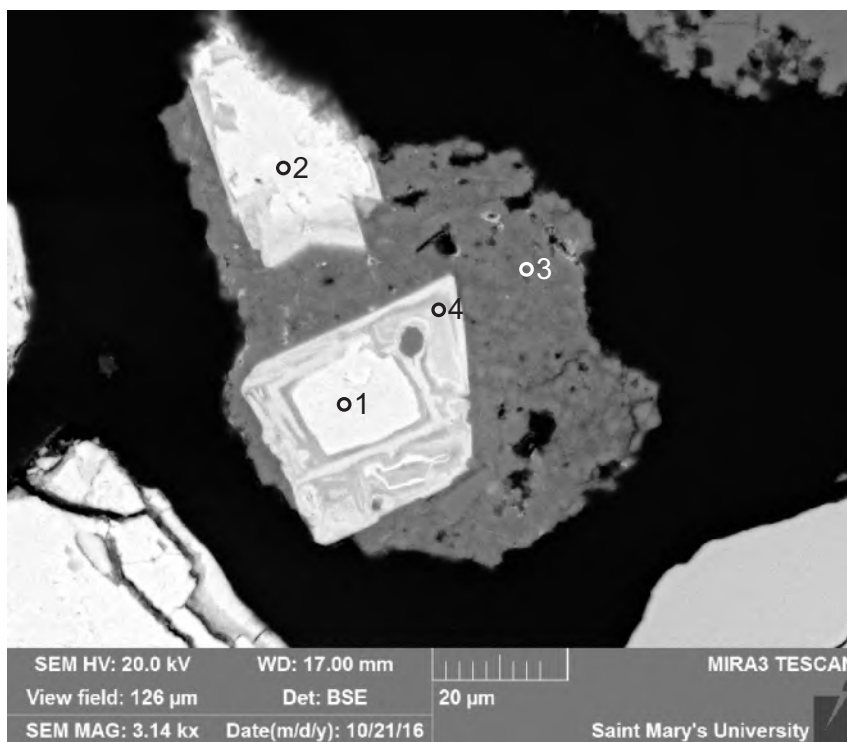

- 1:"Magnetite" +
- 2:"Magnetite" +
- 3:Quartz + Illite
- 4:Fe-oxide/hydroxide +

Figure B3.38: Sample S8 site 10.3 (SEM). Euhedral magnetite and quartz with ~10% illite (hydrothermal).

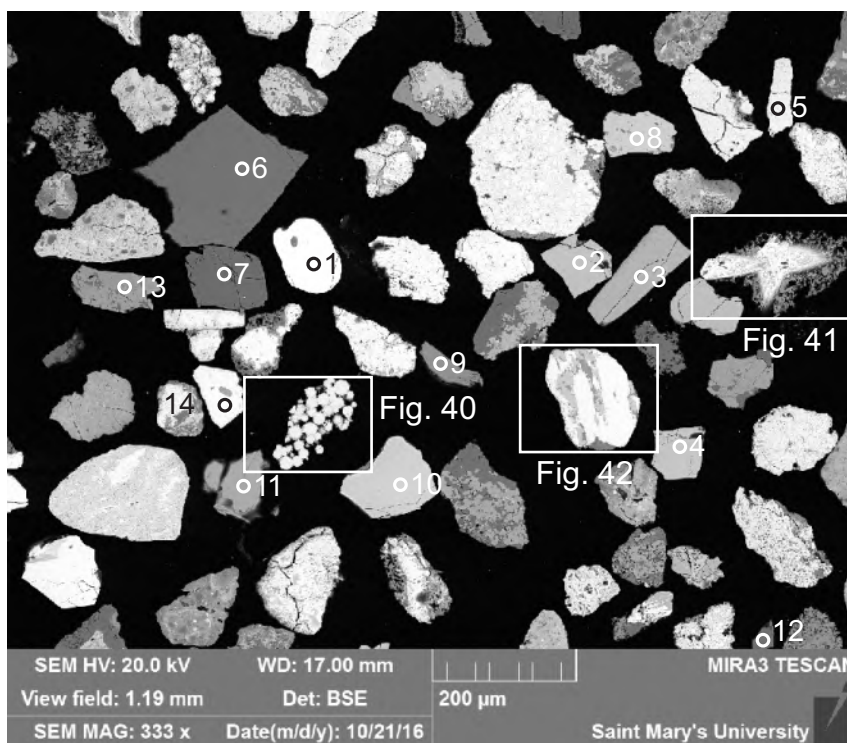

- 1:Zircon
- 2:Garnet
- 3:Apatite
- 4:Spinel
- 5:Fe-oxide/hydroxide +
- 6:Quartz
- 7:Dolomite
- 8:TiO<sub>2</sub>
- 9:Muscovite
- 10:Chromite
- 11:Chlorite
- 12:Quartz
- 13:Epidote +
- 14:Ilmenite

Figure B3.39: Sample S8 site 11 (SEM).

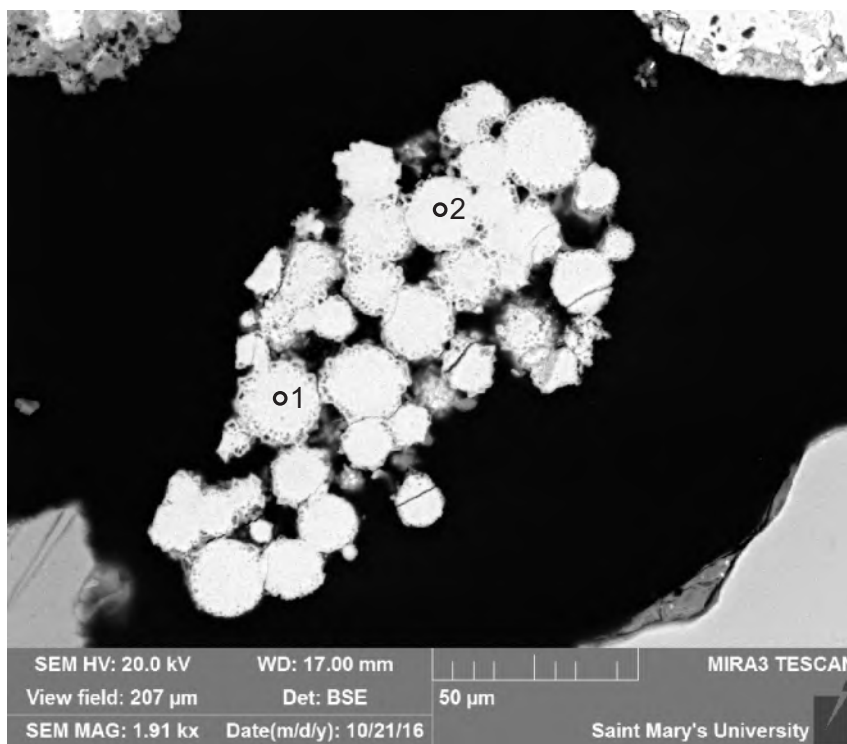

1:"Magnetite" +  
2:"Magnetite" +

Figure B3.40: Sample S8 site 11.2 (SEM). Limonite protoliths of pedogenic origin.

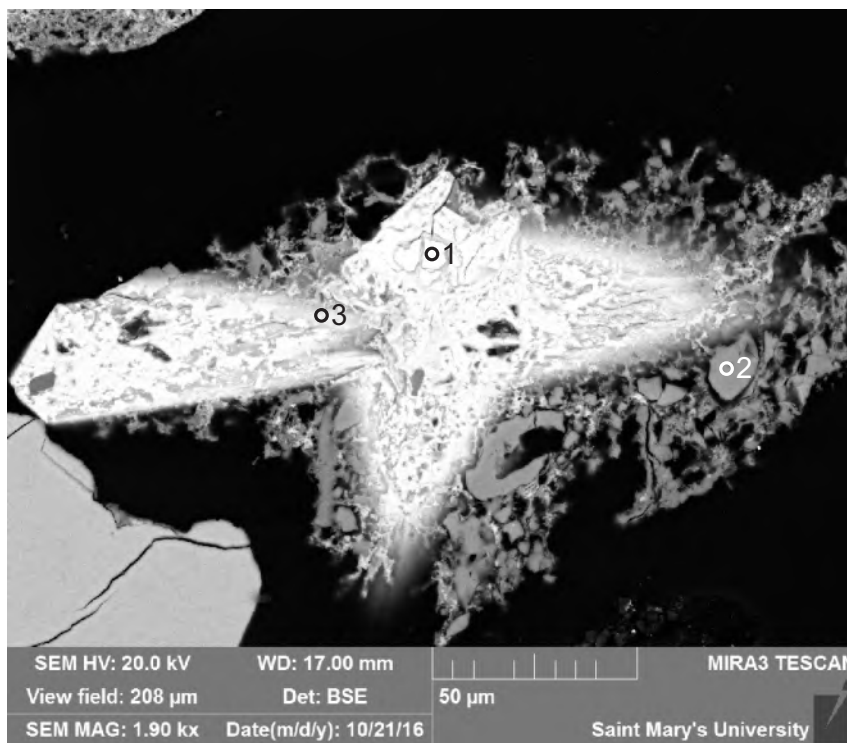

1:Pyrite  
2:Fluorite  
3:Fe-  
oxide/hydroxide +

Figure B3.41: Sample S8 site 11.3 (SEM). Dissolved clast of fluorite, pyrite, and Fe-oxide/hydroxide (compare to Fig. B2.24 and B8.21).

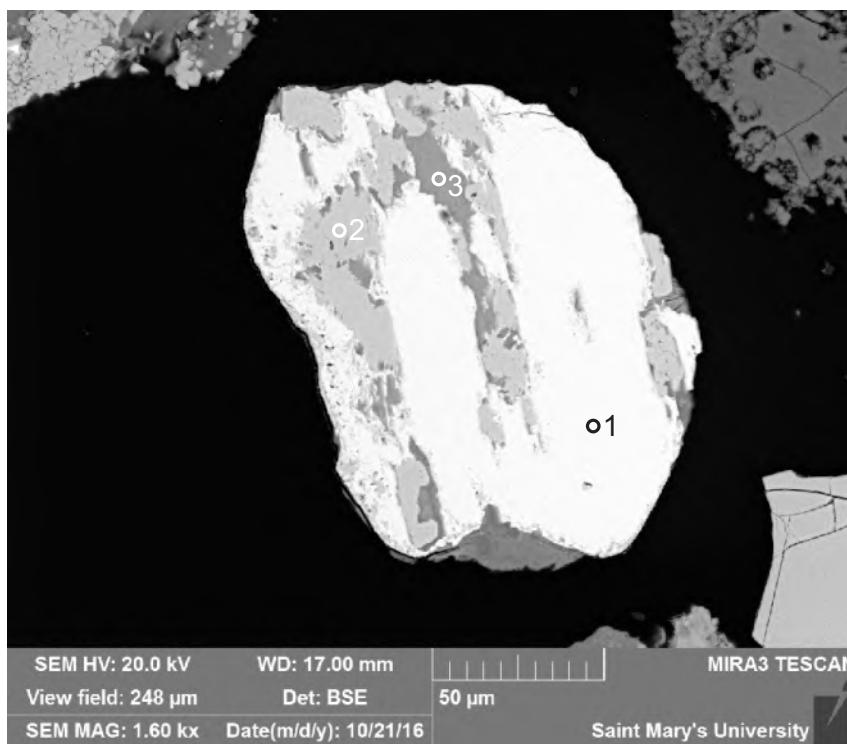

- 1:Ilmenite
- 2:TiO<sub>2</sub>
- 3:Chlorite + TiO<sub>2</sub>

Figure B3.42: Sample S8 site 11.4 (SEM). Lithic clast consisting of ilmenite, titania, and chlorite (metamorphic).

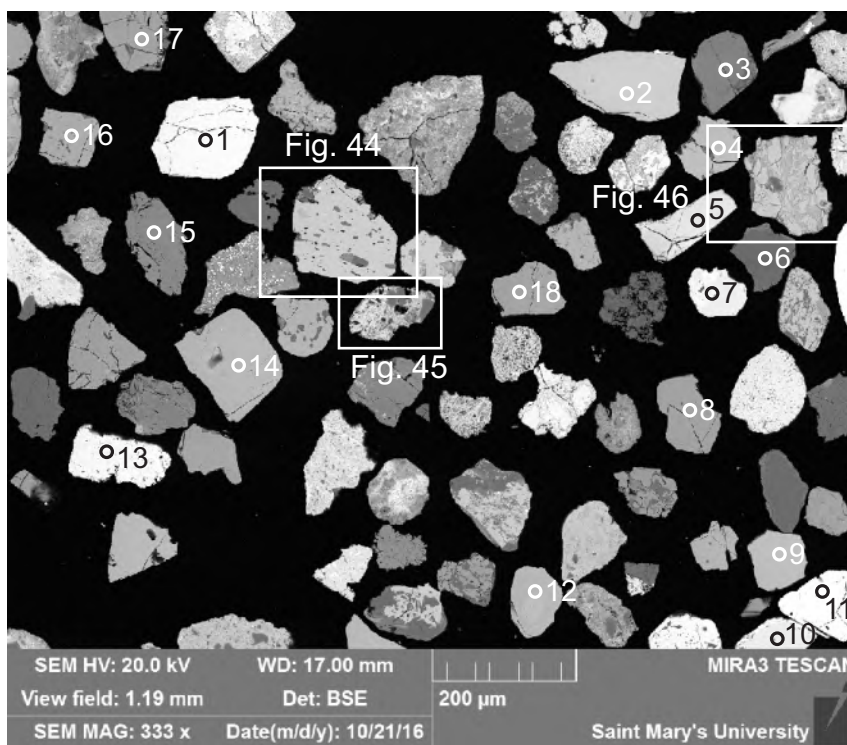

- 1:Ilmenite
- 2:TiO<sub>2</sub>
- 3:Dolomite
- 4:Garnet
- 5:"Magnetite" +
- 6:Dolomite
- 7:Chromite
- 8:Epidote
- 9:Garnet
- 10:Chromite
- 11:Fe-oxide/hydroxide +
- 12:Apatite
- 13:"Magnetite" +
- 14:Apatite
- 15:Epidote
- 16:Garnet?
- 17:Epidote
- 18:Epidote

Figure B3.43: Sample S8 site 12 (SEM).

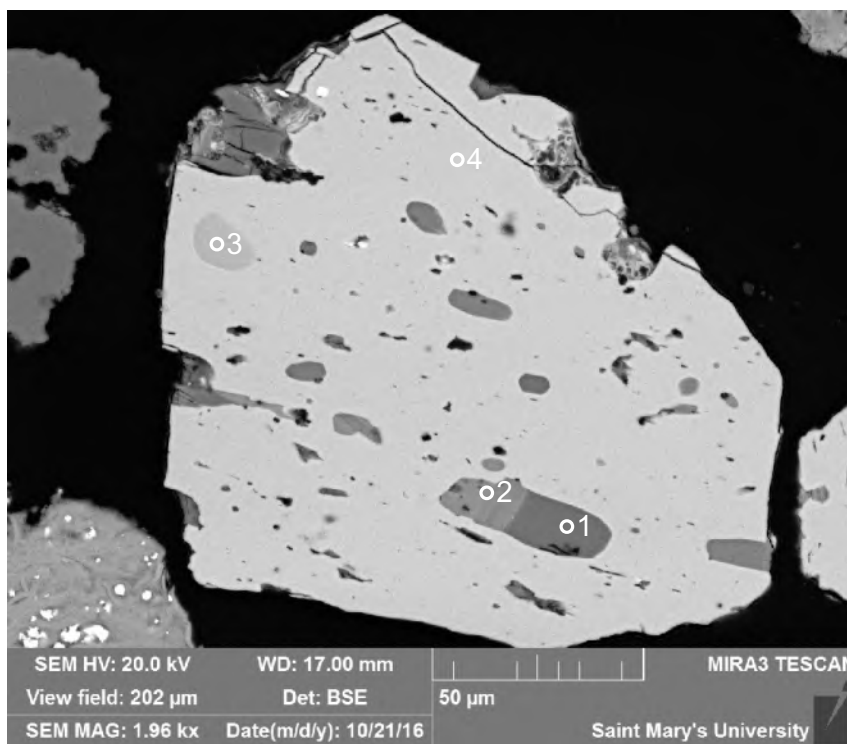

- 1:Quartz
- 2:Chlorite + ?Albite
- 3:Titanite +
- 4:TiO<sub>2</sub>

Figure B3.44: Sample S8 site 12.2 (SEM). Lithic clast consisting of titania, quartz, titanite, and chlorite + albite (metamorphic).

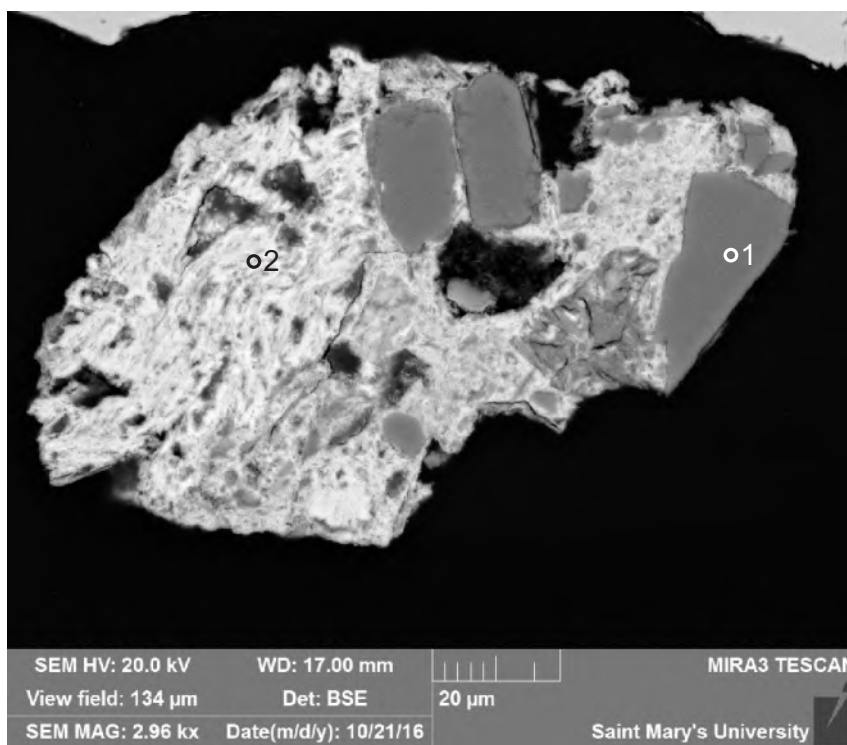

- 1:Quartz
- 2:Fe-oxide/hydroxide +

Figure B3.45: Sample S8 site 12.3 (SEM). Pedogenic aggregate of limonite cemented quartz grains.



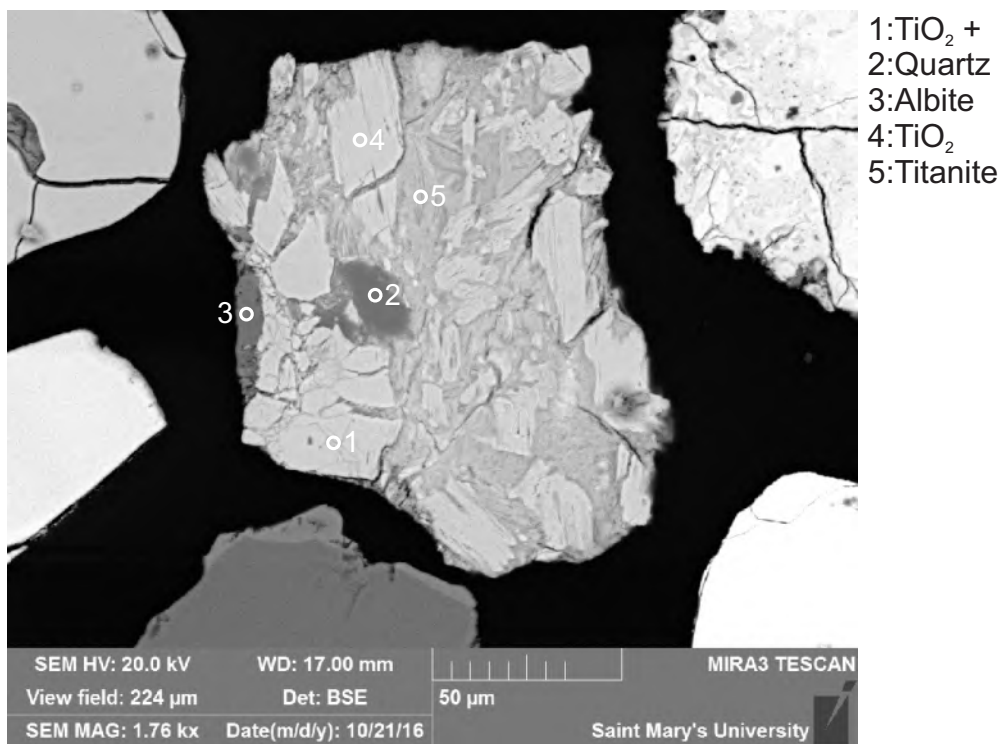

Figure B3.46: Sample S8 site 12.4 (SEM). Lithic clast consisting of quartz, albite, titania, and titanite (metamorphic).

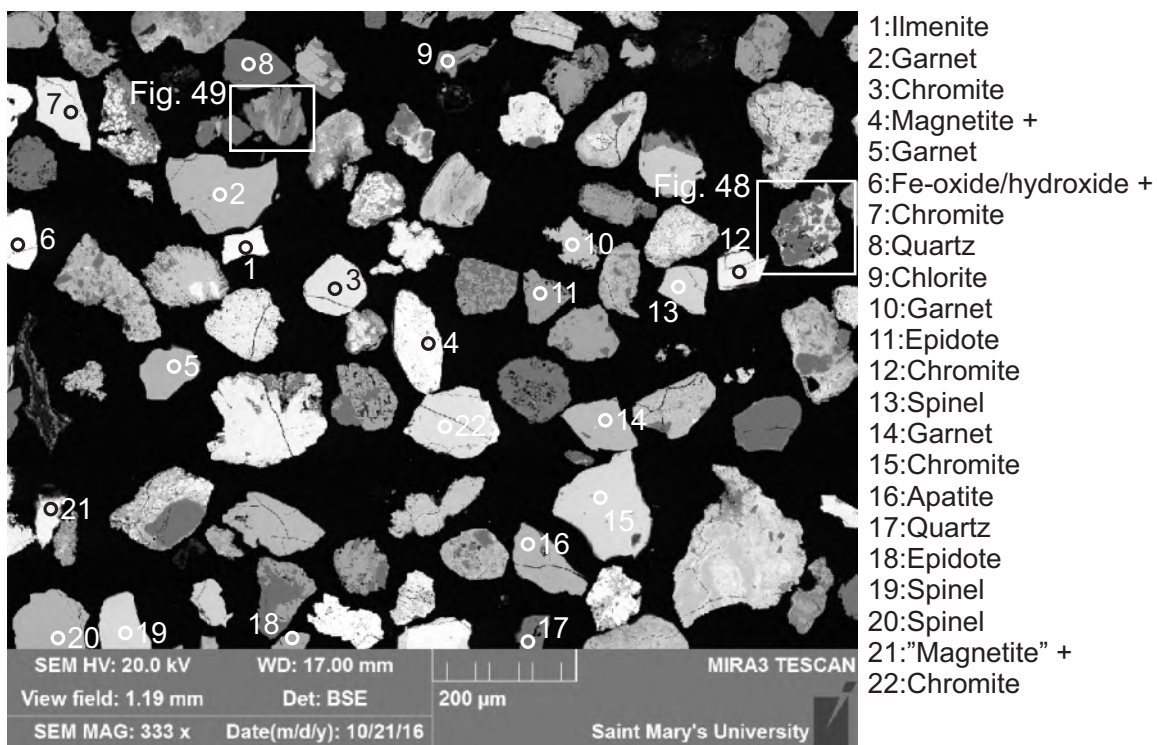

Figure B3.47: Sample S8 site 13 (SEM).

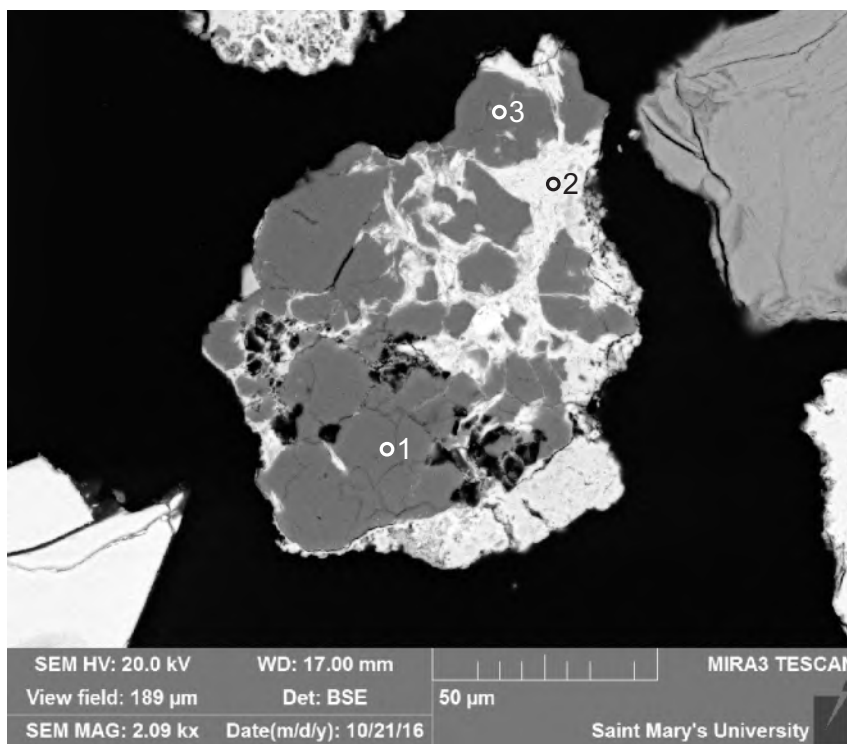

- 1:Quartz
- 2:Fe-oxide/hydroxide +
- 3:Quartz

Figure B3.48: Sample S8 site 13.2 (SEM). Pedogenic aggregate of limonite cemented quartz grains.

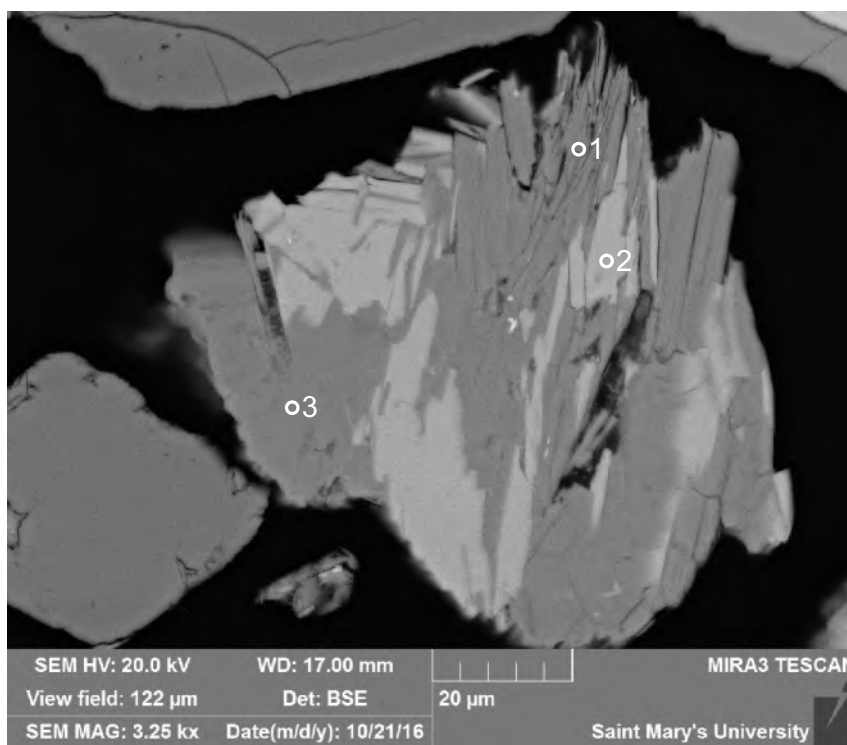

- 1:Muscovite
- 2:Chlorite
- 3:Muscovite

Figure B3.49: Sample S8 site 13.3 (SEM). Lithic clast consisting of muscovite and chlorite (metamorphic).

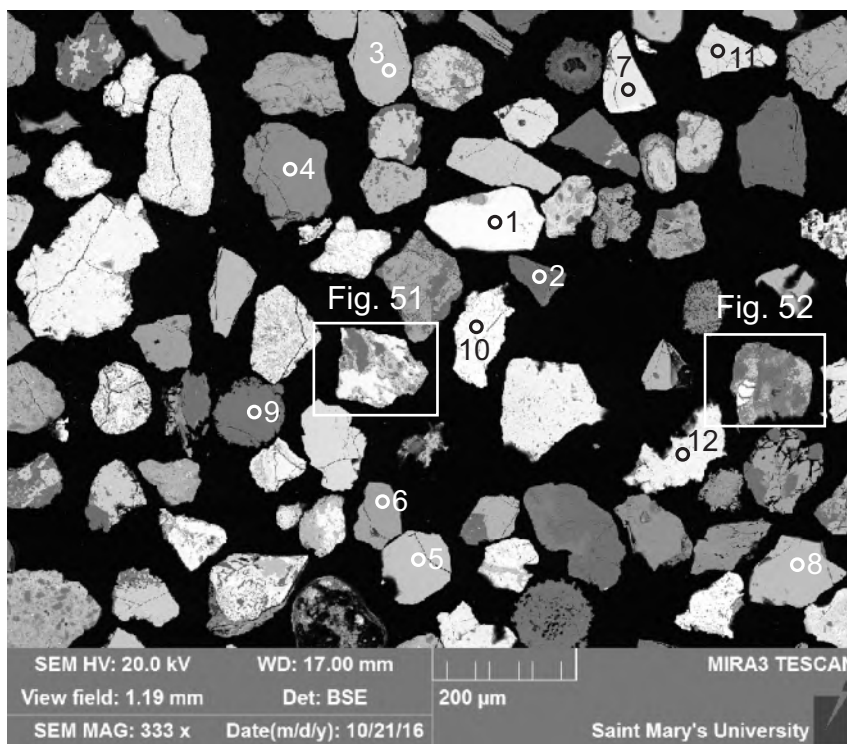

- 1:Ilmenite
- 2:Quartz
- 3:Apatite
- 4:Staurolite
- 5:Garnet
- 6:Epidote
- 7:Chromite
- 8:Garnet
- 9:Quartz
- 10:Fe-oxide/hydroxide +
- 11:Chromite
- 12:"Magnetite" +

Figure B3.50: Sample S8 site 14 (SEM).

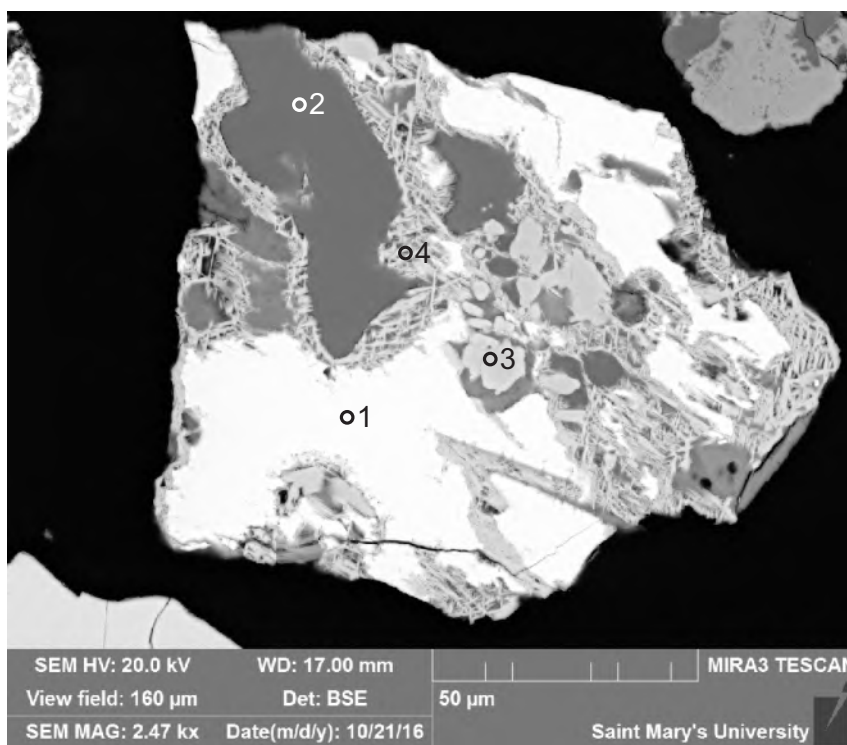

- 1:Ilmenite
- 2:Albite
- 3: $\text{TiO}_2$
- 4: $\text{TiO}_2$

Figure B3.51: Sample S8 site 14.2 (SEM). Lithic clast consisting of titania, albite, and ilmenite (texture looks hydrothermal).



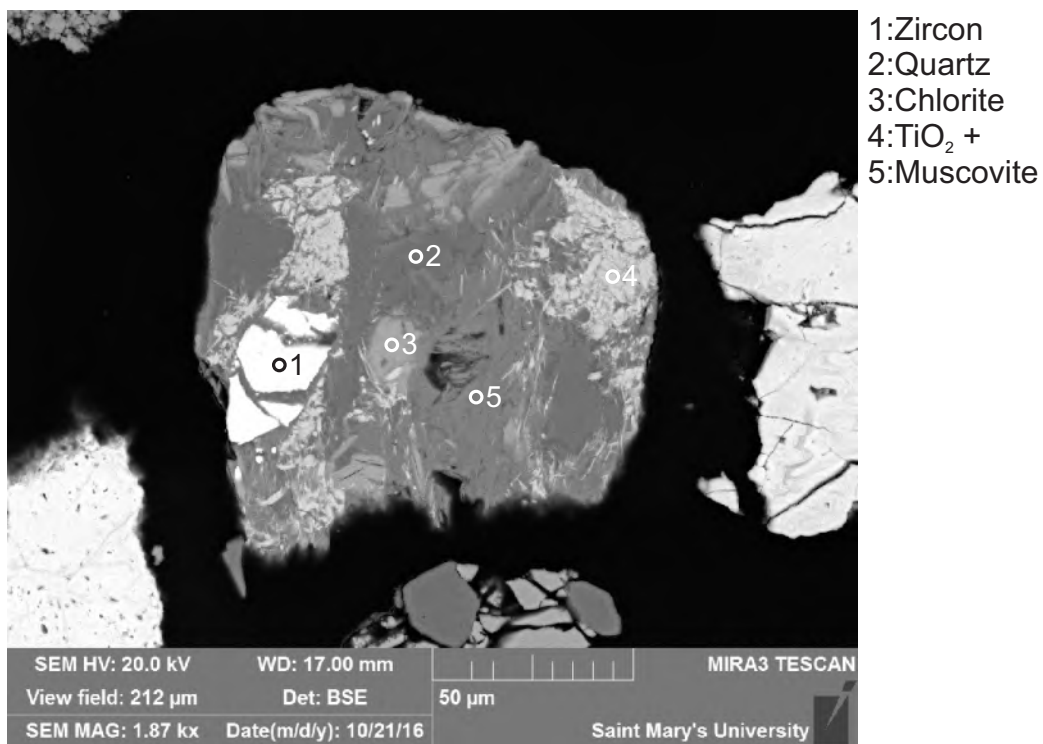

Figure B3.52: Sample S8 site 14.3 (SEM). Lithic clast consisting of quartz, chlorite, muscovite, titania, and zircon (origin uncertain, probably metamorphic).

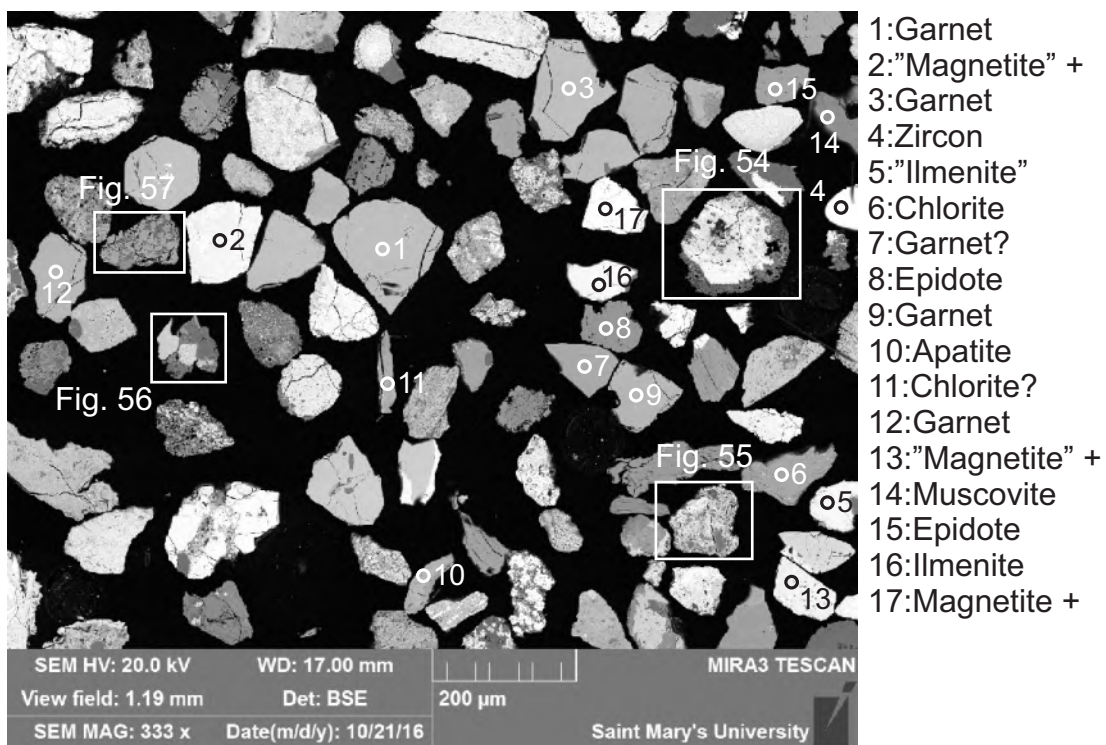

Figure B3.53: Sample S8 site 15 (SEM).



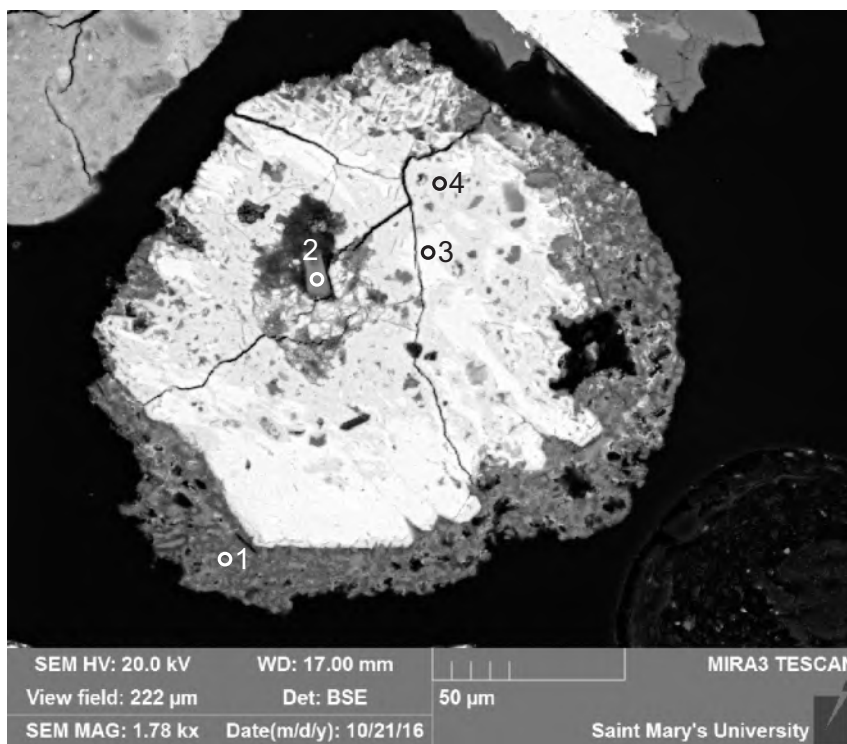

- 1:Quartz +
- 2:Quartz
- 3:"Magnetite" +
- 4:Fe-oxide/hydroxide +

Figure B3.54: Sample S8 site 15.2 (SEM). Lithic clast consisting of quartz and Fe-oxide/hydroxide (compare to Fig. B3.38).

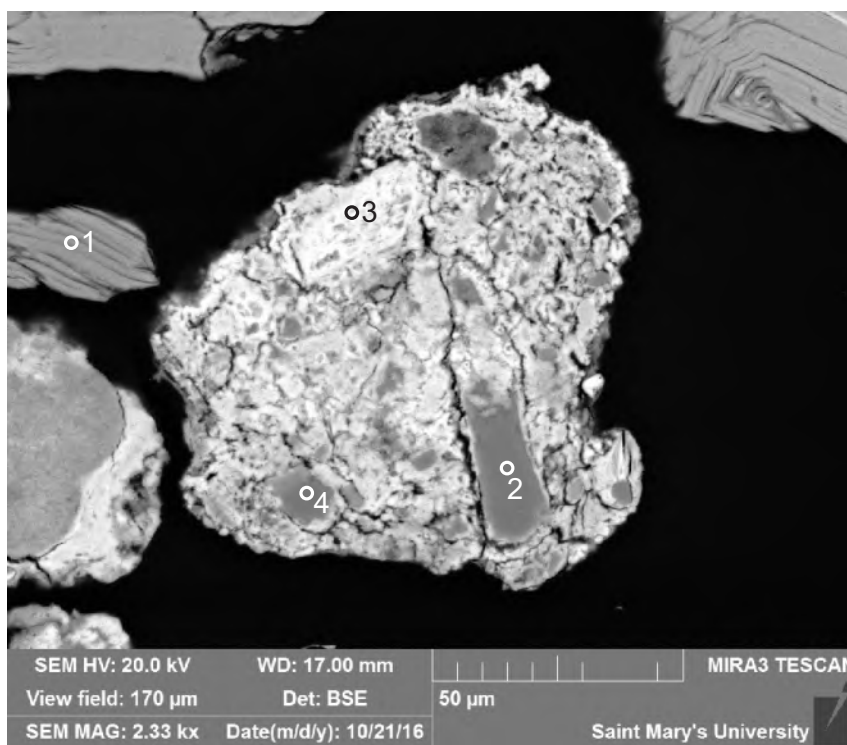

- 1:Chlorite
- 2:Quartz
- 3:Fe-oxide/hydroxide +
- 4:Albite

Figure B3.55: Sample S8 site 15.3 (SEM). Siltstone or altered volcanic lithic clast consisting of quartz, albite, and fine-grained Fe-oxide/hydroxide.

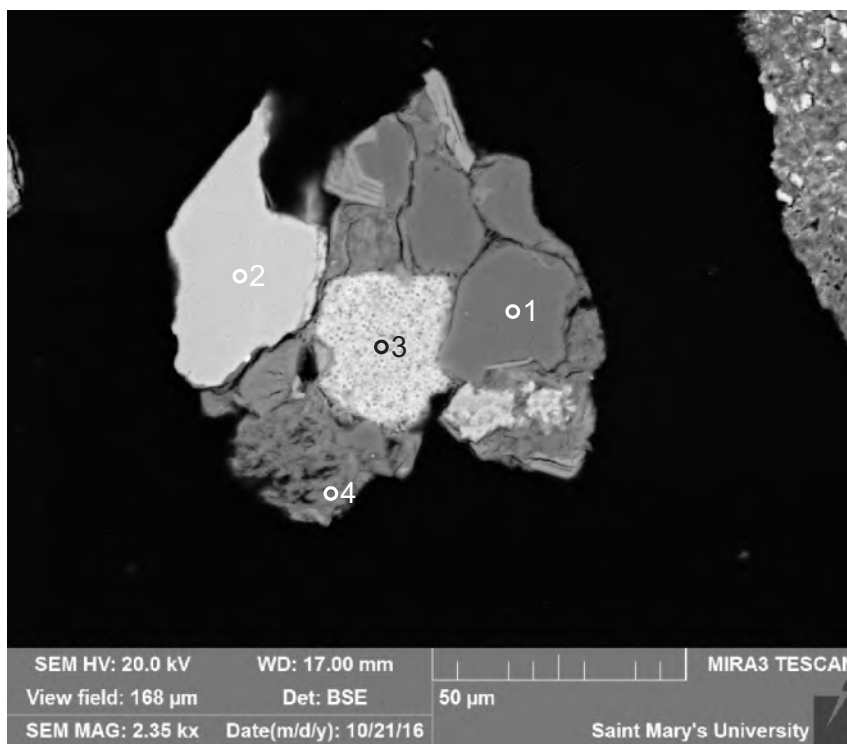

- 1:Quartz
- 2:TiO<sub>2</sub>
- 3:Fe-oxide/hydroxide +
- 4:Albite + Fe-oxide/hydroxide

Figure B3.56: Sample S8 site 15.4 (SEM). Lithic clast consisting of quartz, albite, Fe-oxide/hydroxide, and titania (metamorphic).

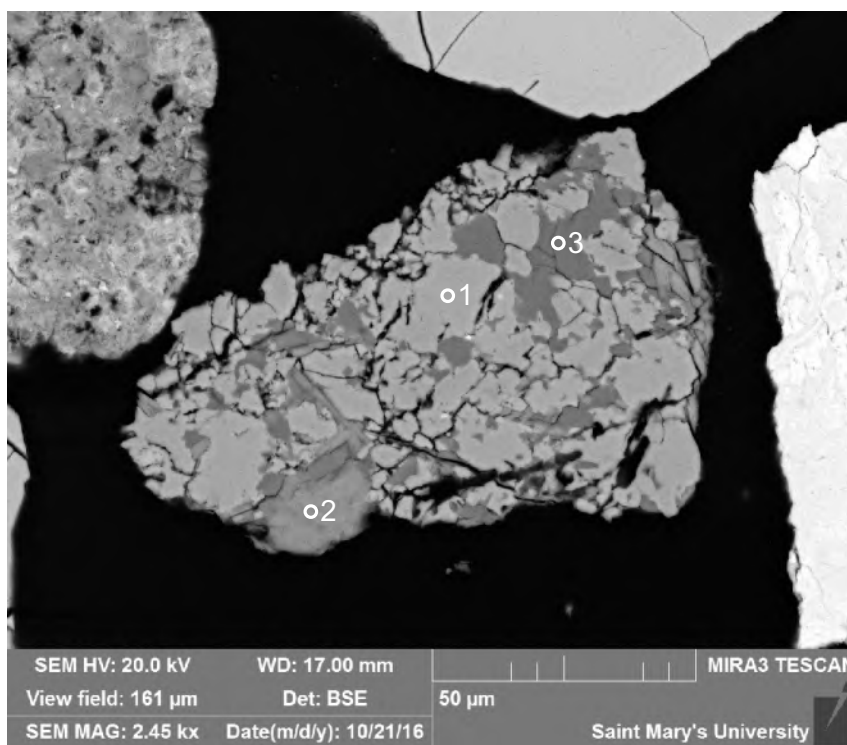

- 1:Epidote
- 2:Chlorite
- 3:Quartz

Figure B3.57: Sample S8 site 15.5 (SEM). Hydrothermal epidote, quartz, and chlorite.

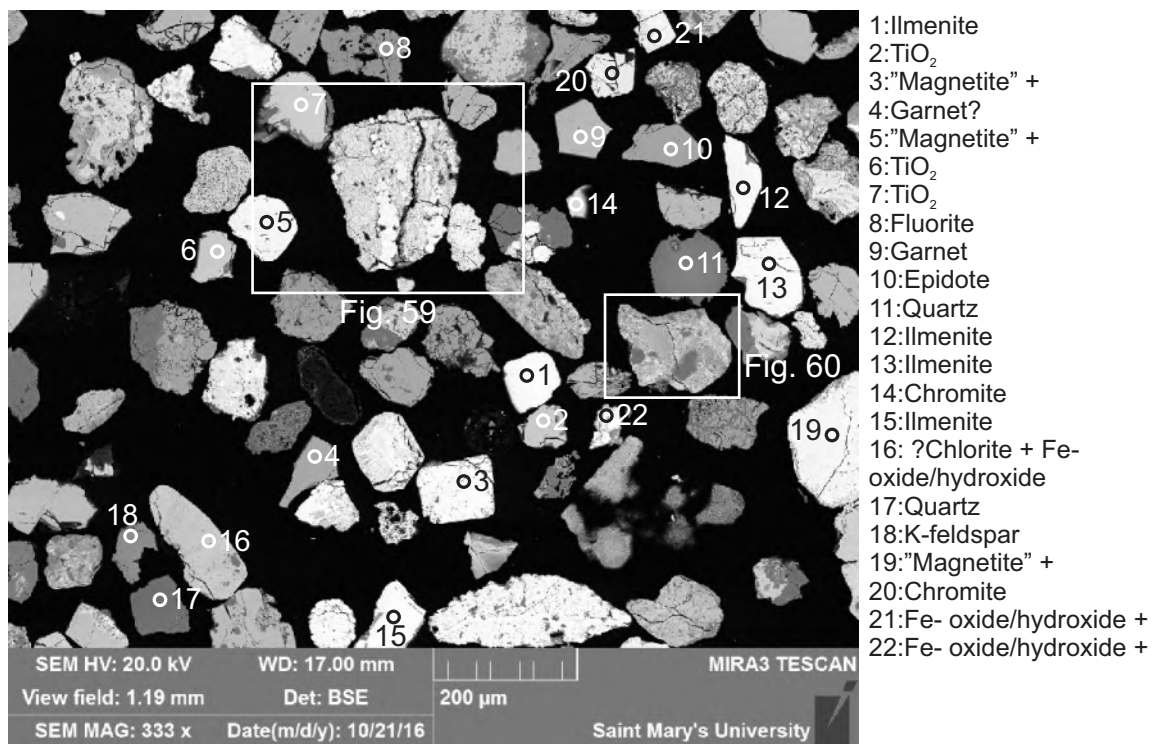

Figure B3.58: Sample S8 site 16 (SEM).

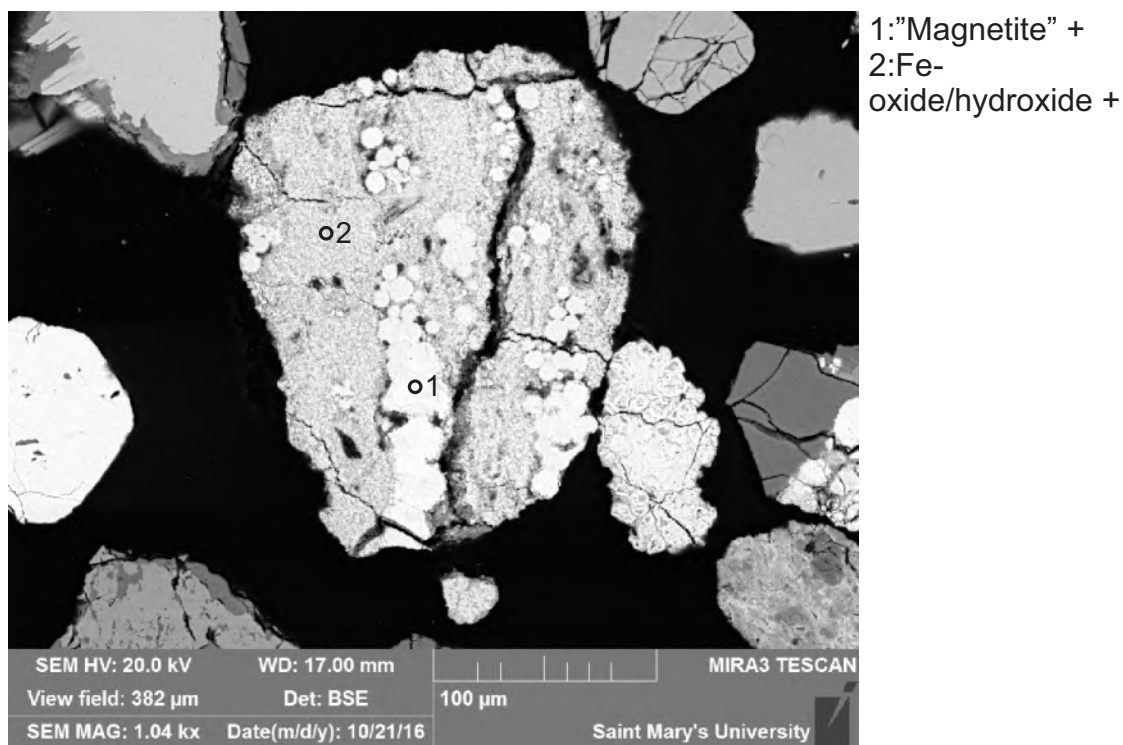

Figure B3.59: Sample S8 site 16.2 (SEM). Magnetite grain highly altered to Fe-oxide/hydroxide (hematite + limonite).



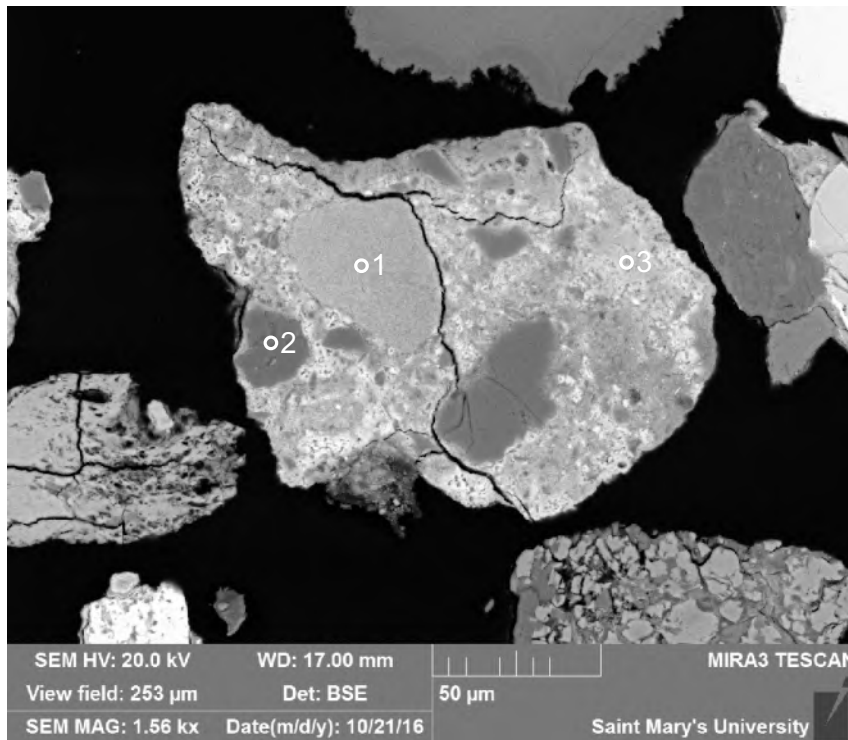

- 1:Chlorite?
- 2:Quartz +
- 3:Chlorite

Figure B3.60: Sample S8 site 16.3 (SEM). Siltstone lithic clast.

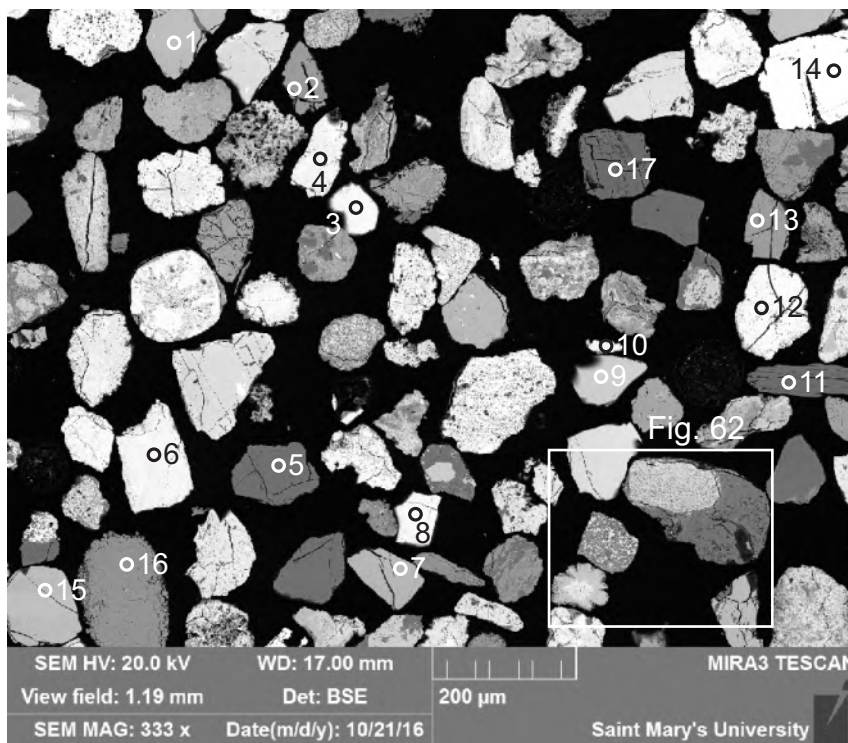

- 1:Garnet
- 2:Epidote
- 3:Ilmenite
- 4:"Magnetite" +
- 5:Quartz
- 6:"Magnetite" +
- 7:Garnet
- 8:Ilmenite
- 9:Chromite
- 10:"Magnetite" +
- 11:Pg
- 12:Fe-oxide/hydroxide +
- 13:Epidote
- 14:Barite
- 15:Garnet
- 16:Fluorite?
- 17:Dolomite

Figure B3.61: Sample S8 site 17 (SEM).



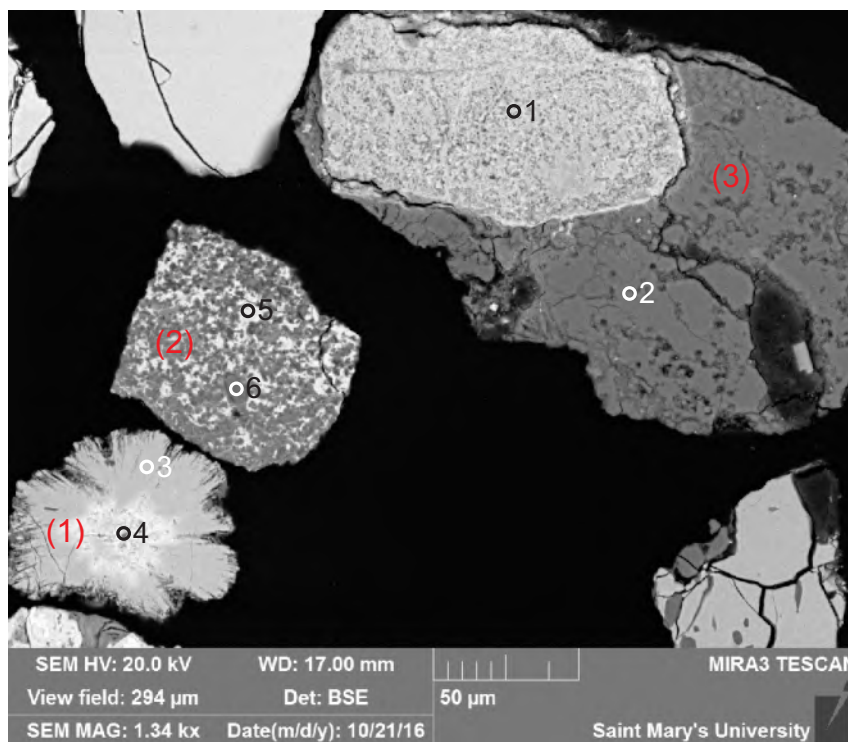

- 1:  $\text{TiO}_2$  +
- 2: Quartz +
- 3: Siderite
- 4: Kaolinite
- 5: Fe-oxide/hydroxide +
- 6: Quartz

Figure B3.62: Sample S8 site 17.2 (SEM). 1: Siderite concretion. 2: Lithic clast of quartz and Fe-oxide/hydroxide (unknown origin). 3: Lithic clast of euhedral titania and quartz with dissolution voids (metamorphic).

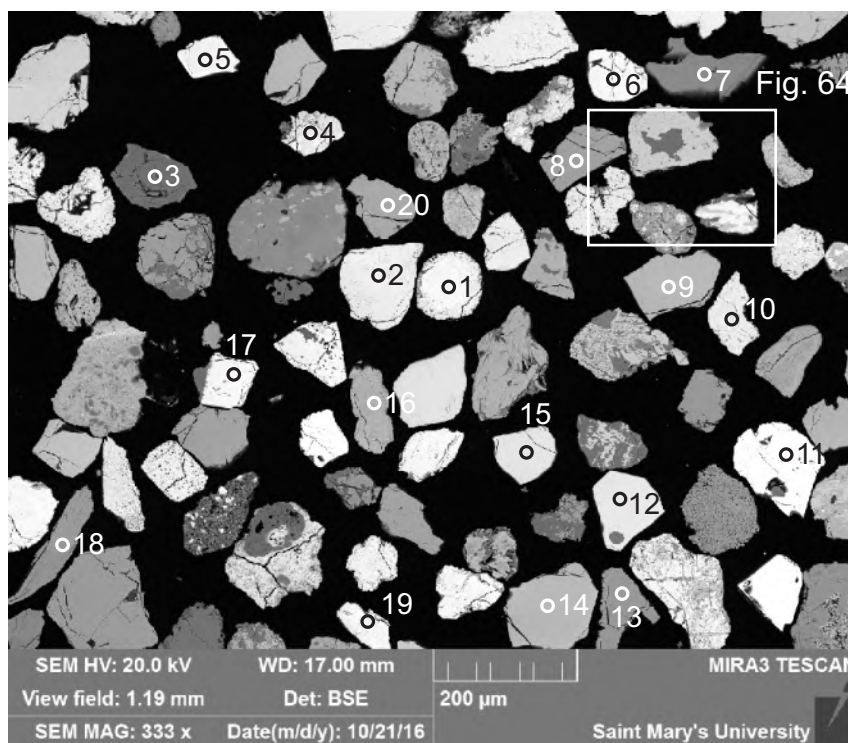

- 1: "Magnetite" +
- 2: "Magnetite" +
- 3: Quartz
- 4: Fe-oxide/hydroxide +
- 5: Chromite
- 6: Ilmenite
- 7: Muscovite
- 8: Epidote
- 9: Garnet
- 10: "Magnetite" +
- 11: Zircon
- 12: Chromite
- 13: Epidote
- 14: Garnet
- 15: Chromite
- 16: Apatite
- 17: Ilmenite
- 18: Chlorite
- 19: "Magnetite" +
- 20: Epidote

Figure B3.63: Sample S8 site 18 (SEM).

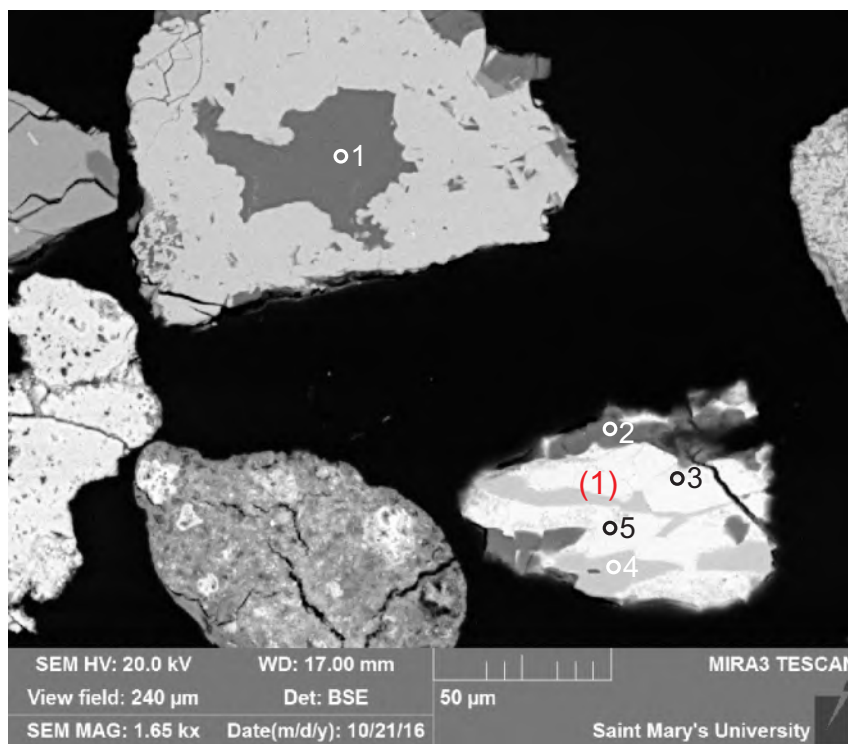

- 1: Quartz
- 2: Albite +
- 3: "Ilmenite"
- 4:  $\text{TiO}_2$
- 5: Ilmenite

Figure B3.64: Sample S8 site 18.2 (SEM). 1: Lithic clast of albite, ilmenite, and titania and fabric metamorphic. Compare to Figs. B3.29 and B3.34.

Table B3.1: EDS analyses for sample S8.

| Sample | Site | Position | Mineral   | SiO2   | TiO2   | Al2O3 | FeO   | MnO  | MgO   | CaO   | Na2O  | K2O  | P2O5  | SO3  | F    | V2O5 | Cr2O3 | CoO | NiO | CuO | ZnO | As2O3 | SrO | ZrO2 | BaO | HfO2 | WO3  | Total | Actual Total |
|--------|------|----------|-----------|--------|--------|-------|-------|------|-------|-------|-------|------|-------|------|------|------|-------|-----|-----|-----|-----|-------|-----|------|-----|------|------|-------|--------------|
| S8     | 1    | 1        | Qz        | 99.68  |        | 0.32  |       |      |       |       |       |      |       |      |      |      |       |     |     |     |     |       |     |      |     |      |      | 100   | 119          |
| S8     | 1    | 2        | Ap        |        |        |       | 0.28  |      |       | 47.33 | 1.25  |      | 38.98 | 2.45 | 6.91 |      |       |     |     |     |     |       |     |      |     |      | 2.79 | 100   | 106          |
| S8     | 1    | 3        | Ep        | 40.31  | 0.61   | 23.76 | 9.89  |      |       | 22.44 |       |      |       |      |      |      |       |     |     |     |     |       |     |      |     |      |      | 97    | 106          |
| S8     | 1    | 4        | Qz        | 100.00 |        |       |       |      |       |       |       |      |       |      |      |      |       |     |     |     |     |       |     |      |     |      |      | 100   | 119          |
| S8     | 1    | 5        | Grt       | 39.97  |        | 21.20 | 27.15 | 0.82 | 2.35  | 8.51  |       |      |       |      |      |      |       |     |     |     |     |       |     |      |     |      |      | 100   | 110          |
| S8     | 1    | 6        | Grt       | 39.54  |        | 20.84 | 25.11 | 6.88 | 0.99  | 6.65  |       |      |       |      |      |      |       |     |     |     |     |       |     |      |     |      |      | 100   | 109          |
| S8     | 1    | 7        | "Mag" +   | 4.37   |        |       | 95.63 |      |       |       |       |      |       |      |      |      |       |     |     |     |     |       |     |      |     |      |      | 100   | 75           |
| S8     | 1    | 8        | "Mag" +   | 3.38   |        | 1.10  | 95.51 |      |       |       |       |      |       |      |      |      |       |     |     |     |     |       |     |      |     |      |      | 100   | 73           |
| S8     | 1    | 9        | Chl       | 26.81  |        | 19.85 | 22.73 |      | 15.61 |       |       |      |       |      |      |      |       |     |     |     |     |       |     |      |     |      |      | 85    | 94           |
| S8     | 1    | 10       | Ab        | 69.15  |        | 18.92 |       |      |       | 0.25  | 11.69 |      |       |      |      |      |       |     |     |     |     |       |     |      |     |      |      | 100   | 117          |
| S8     | 1    | 11       | Chr       |        |        | 9.29  | 21.58 |      | 8.58  |       |       |      |       |      |      |      | 60.55 |     |     |     |     |       |     |      |     |      |      | 100   | 110          |
| S8     | 1    | 12       | Ttn       | 32.63  | 34.28  | 2.58  | 2.39  |      |       | 27.17 |       |      |       |      |      | 0.95 |       |     |     |     |     |       |     |      |     |      |      | 100   | 111          |
| S8     | 1    | 13       | Qz        | 100.00 |        |       |       |      |       |       |       |      |       |      |      |      |       |     |     |     |     |       |     |      |     |      |      | 100   | 122          |
| S8     | 1    | 14       | "Mag" +   | 3.10   |        |       | 96.90 |      |       |       |       |      |       |      |      |      |       |     |     |     |     |       |     |      |     |      |      | 100   | 80           |
| S8     | 1    | 15       | Ep        | 40.25  |        | 24.96 | 9.18  | 0.38 |       | 22.23 |       |      |       |      |      |      |       |     |     |     |     |       |     |      |     |      |      | 97    | 105          |
| S8     | 1    | 16       | TiO2      |        | 100.00 |       |       |      |       |       |       |      |       |      |      |      |       |     |     |     |     |       |     |      |     |      |      | 100   | 106          |
| S8     | 1    | 17       | Chl       | 28.39  |        | 18.25 | 25.96 | 0.26 | 11.71 | 0.26  |       | 0.17 |       |      |      |      |       |     |     |     |     |       |     |      |     |      |      | 85    | 91           |
| S8     | 1    | 18       | Qz        | 100.00 |        |       |       |      |       |       |       |      |       |      |      |      |       |     |     |     |     |       |     |      |     |      |      | 100   | 122          |
| S8     | 1    | 19       | Chl +     | 23.28  | 0.63   | 18.33 | 49.14 |      |       | 0.51  | 0.85  | 0.41 | 1.58  |      |      |      |       |     |     |     |     |       |     |      |     |      | 5.26 | 100   | 68           |
| S8     | 1    | 20       | Dol       |        |        |       |       |      | 22.42 | 31.58 |       |      |       |      |      |      |       |     |     |     |     |       |     |      |     |      |      | 54    | 56           |
| S8     | 1.2  | 1        | "Mag"     | 5.52   |        | 1.67  | 91.09 |      |       | 0.49  |       |      | 1.23  |      |      |      |       |     |     |     |     |       |     |      |     |      |      | 100   | 78           |
| S8     | 1.2  | 2        | Sd +      | 2.83   | 0.30   | 2.46  | 41.94 | 0.62 |       | 0.76  | 0.69  |      | 1.23  |      |      |      |       |     |     |     |     |       |     |      |     |      | 5.16 | 56    | 69           |
| S8     | 1.2  | 3        | Sd +      | 3.46   |        | 3.34  | 43.36 |      |       | 0.62  |       |      | 1.31  |      |      |      |       |     |     |     |     |       |     |      |     |      | 3.91 | 56    | 70           |
| S8     | 1.3  | 1        | Qz        | 99.71  |        |       | 0.29  |      |       |       |       |      |       |      |      |      |       |     |     |     |     |       |     |      |     |      |      | 100   | 121          |
| S8     | 1.3  | 2        | Feohy +   | 8.55   |        | 0.70  | 86.92 |      |       | 0.57  |       |      | 1.25  |      |      |      | 2.01  |     |     |     |     |       |     |      |     |      |      | 100   | 79           |
| S8     | 1.3  | 3        | Ab        | 66.94  |        | 20.50 | 0.42  |      |       | 1.75  | 10.39 |      |       |      |      |      |       |     |     |     |     |       |     |      |     |      |      | 100   | 120          |
| S8     | 1.3  | 4        | "Mag" +   | 5.08   |        |       | 94.27 |      |       | 0.65  |       |      |       |      |      |      |       |     |     |     |     |       |     |      |     |      |      | 100   | 80           |
| S8     | 1.3  | 5        | "Mag" +   | 4.87   |        |       | 94.60 |      |       | 0.54  |       |      |       |      |      |      |       |     |     |     |     |       |     |      |     |      |      | 100   | 80           |
| S8     | 1.3  | 6        | Feohy +   | 8.59   |        | 0.57  | 87.13 |      |       | 0.66  |       |      | 1.02  |      |      |      | 1.10  |     |     |     |     | 0.93  |     |      |     |      |      | 100   | 78           |
| S8     | 1.4  | 1        | Qz        | 99.55  |        |       | 0.45  |      |       |       |       |      |       |      |      |      |       |     |     |     |     |       |     |      |     |      |      | 100   | 121          |
| S8     | 1.4  | 2        | Qz        | 99.73  |        |       | 0.27  |      |       |       |       |      |       |      |      |      |       |     |     |     |     |       |     |      |     |      |      | 100   | 119          |
| S8     | 1.4  | 3        | Qz        | 99.68  |        |       | 0.32  |      |       |       |       |      |       |      |      |      |       |     |     |     |     |       |     |      |     |      |      | 100   | 120          |
| S8     | 1.4  | 4        | Chl + Ill | 56.60  | 0.35   | 13.87 | 23.59 |      | 0.58  | 0.26  | 0.73  | 1.03 | 1.02  |      |      |      |       |     |     |     |     |       |     |      |     |      | 1.96 | 100   | 91           |
| S8     | 1.4  | 5        | Chl +     | 30.74  | 0.37   | 14.32 | 36.23 |      |       | 0.26  | 0.62  | 0.68 | 1.77  |      |      |      |       |     |     |     |     |       |     |      |     |      |      | 85    | 95           |
| S8     | 2    | 1        | Qz        | 100.00 |        |       |       |      |       |       |       |      |       |      |      |      |       |     |     |     |     |       |     |      |     |      |      | 100   | 120          |
| S8     | 2    | 2        | Chr       |        | 0.36   | 16.33 | 25.89 |      | 9.12  |       |       |      |       |      |      |      | 48.30 |     |     |     |     |       |     |      |     |      |      | 100   | 106          |
| S8     | 2    | 3        | Grt       | 39.35  |        | 20.68 | 28.71 | 1.22 | 1.17  | 8.86  |       |      |       |      |      |      |       |     |     |     |     |       |     |      |     |      |      | 100   | 113          |
| S8     | 2    | 4        | Grt       | 39.40  |        | 20.73 | 32.06 | 3.14 | 1.20  | 3.47  |       |      |       |      |      |      |       |     |     |     |     |       |     |      |     |      |      | 100   | 110          |
| S8     | 2    | 5        | Grt?      | 41.15  |        | 21.93 | 18.92 | 0.68 | 7.59  | 9.73  |       |      |       |      |      |      |       |     |     |     |     |       |     |      |     |      |      | 100   | 113          |
| S8     | 2    | 6        | Dol       |        |        |       |       |      | 22.29 | 31.71 |       |      |       |      |      |      |       |     |     |     |     |       |     |      |     |      |      | 54    | 54           |
| S8     | 2    | 7        | Chl       | 25.90  |        | 22.79 | 20.58 |      | 15.73 |       |       |      |       |      |      |      |       |     |     |     |     |       |     |      |     |      |      | 85    | 102          |
| S8     | 2    | 8        | Ap        |        |        |       |       |      | 0.31  | 47.67 |       |      | 43.50 |      | 6.57 |      |       |     |     |     |     |       |     |      |     |      | 1.94 | 100   | 128          |
| S8     | 2    | 9        | "Mag" +   | 3.84   |        | 0.94  | 92.37 | 1.86 |       |       |       |      | 1.00  |      |      |      |       |     |     |     |     |       |     |      |     |      |      | 100   | 82           |

Table B3.1: EDS analyses for sample S8.

| Sample | Site | Position | Mineral     | SiO2   | TiO2  | Al2O3 | FeO   | MnO   | MgO   | CaO   | Na2O  | K2O   | P2O5  | SO3 | F    | V2O5 | Cr2O3 | CoO | NiO  | CuO  | ZnO | As2O3 | SrO | ZrO2  | BaO  | HfO2 | WO3  | Total | Actual<br>Total |
|--------|------|----------|-------------|--------|-------|-------|-------|-------|-------|-------|-------|-------|-------|-----|------|------|-------|-----|------|------|-----|-------|-----|-------|------|------|------|-------|-----------------|
| S8     | 2    | 10       | "Mag" +     | 3.81   |       | 0.63  | 95.56 |       |       |       |       |       |       |     |      |      |       |     |      |      |     |       |     |       |      |      |      | 100   | 78              |
| S8     | 2    | 11       | Chl +       | 31.38  | 0.45  | 20.87 | 26.76 |       | 0.85  | 0.50  | 0.39  | 0.89  | 1.15  |     |      |      |       |     |      |      |     |       |     |       |      |      | 1.77 | 85    | 85              |
| S8     | 2    | 12       | Qz          | 99.54  | 0.46  |       |       |       |       |       |       |       |       |     |      |      |       |     |      |      |     |       |     |       |      |      |      | 100   | 115             |
| S8     | 2    | 13       | Chl         | 25.04  |       | 21.85 | 26.52 |       | 11.08 |       | 0.51  |       |       |     |      |      |       |     |      |      |     |       |     |       |      |      |      | 85    | 90              |
| S8     | 2.2  | 1        | ?Clay       | 57.91  | 0.54  | 16.34 | 11.75 |       | 4.04  | 0.39  | 1.19  | 4.88  |       |     |      |      |       |     |      |      |     |       |     |       |      |      | 2.94 | 100   | 98              |
| S8     | 2.2  | 2        | "Mag" +     | 3.25   |       | 1.16  | 92.32 | 1.20  |       | 0.39  |       |       | 1.28  |     |      |      | 0.40  |     |      |      |     |       |     |       |      |      |      | 100   | 80              |
| S8     | 2.2  | 3        | Feohy +     | 5.88   |       | 4.31  | 86.00 |       |       | 0.52  |       |       | 3.28  |     |      |      |       |     |      |      |     |       |     |       |      |      |      | 100   | 79              |
| S8     | 2.2  | 4        | Kfs         | 65.95  |       | 17.70 |       |       |       |       | 0.32  | 15.30 |       |     |      |      |       |     |      |      |     |       |     |       | 0.73 |      |      | 100   | 113             |
| S8     | 2.2  | 5        | Ab          | 68.89  |       | 19.00 | 0.82  |       | 0.54  |       | 10.54 | 0.21  |       |     |      |      |       |     |      |      |     |       |     |       |      |      |      | 100   | 111             |
| S8     | 2.2  | 6        | Ab          | 68.81  |       | 19.05 |       |       |       | 0.41  | 10.88 | 0.85  |       |     |      |      |       |     |      |      |     |       |     |       |      |      |      | 100   | 117             |
| S8     | 2.3  | 1        | Feohy +     | 7.96   |       | 4.37  | 82.40 |       |       | 0.53  | 0.93  | 0.28  | 3.08  |     |      | 0.46 |       |     |      |      |     |       |     |       |      |      |      | 100   | 79              |
| S8     | 2.3  | 2        | Chl +       | 42.46  | 0.58  | 16.91 | 26.48 |       | 2.74  |       | 0.94  | 4.85  | 0.98  |     |      |      |       |     |      |      |     |       |     |       |      |      | 4.08 | 100   | 87              |
| S8     | 2.3  | 3        | Chl +       | 43.66  | 0.84  | 15.37 | 27.60 |       | 3.66  |       | 0.66  | 5.72  | 0.67  |     |      |      |       |     |      |      |     |       |     |       |      |      | 1.83 | 100   | 89              |
| S8     | 2.3  | 4        | Feohy +     | 6.55   |       | 4.38  | 80.85 |       |       | 0.78  | 1.03  |       | 2.87  |     |      |      |       |     |      |      |     |       |     |       |      |      | 3.55 | 100   | 76              |
| S8     | 2.4  | 1        | Ep          | 41.31  |       | 28.98 | 4.03  |       |       | 22.68 |       |       |       |     |      |      |       |     |      |      |     |       |     |       |      |      |      | 97    | 111             |
| S8     | 2.4  | 2        | Ab + Kln    | 50.79  |       | 36.97 | 0.44  |       | 0.40  | 0.71  | 5.96  | 0.59  |       |     | 4.14 |      |       |     |      |      |     |       |     |       |      |      |      | 100   | 113             |
| S8     | 2.5  | 1        | Ep          | 40.08  |       | 24.77 | 8.89  |       |       | 22.80 |       |       |       |     |      |      | 0.47  |     |      |      |     |       |     |       |      |      |      | 97    | 109             |
| S8     | 2.5  | 2        | Chl         | 28.99  |       | 19.82 | 12.90 | 0.26  | 22.50 | 0.26  |       |       |       |     |      |      | 0.27  |     |      |      |     |       |     |       |      |      |      | 85    | 96              |
| S8     | 2.5  | 3        | Ab          | 66.82  |       | 20.26 | 0.95  |       | 0.70  | 0.98  | 10.06 | 0.22  |       |     |      |      |       |     |      |      |     |       |     |       |      |      |      | 100   | 114             |
| S8     | 3    | 1        | Qz          | 100.00 |       |       |       |       |       |       |       |       |       |     |      |      |       |     |      |      |     |       |     |       |      |      |      | 100   | 122             |
| S8     | 3    | 2        | Spl         |        |       | 35.65 | 14.04 |       | 15.01 |       |       |       |       |     |      |      | 35.30 |     |      |      |     |       |     |       |      |      |      | 100   | 110             |
| S8     | 3    | 3        | Grt         | 39.36  |       | 20.69 | 31.45 | 0.33  | 1.68  | 6.50  |       |       |       |     |      |      |       |     |      |      |     |       |     |       |      |      |      | 100   | 113             |
| S8     | 3    | 4        | Chr         |        |       | 12.27 | 21.78 |       | 9.61  |       |       |       |       |     |      | 0.44 | 55.91 |     |      |      |     |       |     |       |      |      |      | 100   | 110             |
| S8     | 3    | 5        | Spl         |        |       | 32.00 | 17.58 |       | 13.90 |       |       |       |       |     |      |      | 36.53 |     |      |      |     |       |     |       |      |      |      | 100   | 108             |
| S8     | 3    | 6        | Qz          | 100.00 |       |       |       |       |       |       |       |       |       |     |      |      |       |     |      |      |     |       |     |       |      |      |      | 100   | 114             |
| S8     | 3    | 7        | TiO2        |        | 99.60 |       | 0.40  |       |       |       |       |       |       |     |      |      |       |     |      |      |     |       |     |       |      |      |      | 100   | 104             |
| S8     | 3    | 8        | Ep          | 40.66  |       | 28.77 | 5.12  |       |       | 22.45 |       |       |       |     |      |      |       |     |      |      |     |       |     |       |      |      |      | 97    | 108             |
| S8     | 3    | 9        | Feohy       |        | 5.01  | 2.64  | 89.69 | 0.83  | 1.20  |       |       |       |       |     |      | 0.64 |       |     |      |      |     |       |     |       |      |      |      | 100   | 97              |
| S8     | 3    | 10       | Zrn         | 31.10  |       |       |       |       |       |       |       |       |       |     |      |      |       |     |      |      |     |       |     | 67.14 |      | 1.76 |      | 100   | 121             |
| S8     | 3    | 11       | Ap          |        |       |       | 0.82  |       |       | 47.49 |       |       | 43.22 |     | 6.54 |      |       |     |      |      |     |       |     |       |      |      | 1.93 | 100   | 128             |
| S8     | 3    | 12       | "Mag" +     | 3.14   |       | 1.53  | 93.42 |       |       |       |       |       | 1.92  |     |      |      |       |     |      |      |     |       |     |       |      |      |      | 100   | 85              |
| S8     | 3    | 13       | "Mag" +     | 3.31   |       | 1.43  | 93.46 |       |       | 0.37  |       |       | 1.42  |     |      |      |       |     |      |      |     |       |     |       |      |      |      | 100   | 79              |
| S8     | 3    | 14       | Bt          | 39.68  | 1.94  | 18.27 | 16.75 |       | 10.78 |       |       | 8.58  |       |     |      |      |       |     |      |      |     |       |     |       |      |      |      | 96    | 104             |
| S8     | 3    | 15       | Qz          | 99.07  |       | 0.70  | 0.23  |       |       |       |       |       |       |     |      |      |       |     |      |      |     |       |     |       |      |      |      | 100   | 115             |
| S8     | 3    | 16       | "Mag" +     | 4.38   |       | 0.66  | 93.41 | 0.77  |       |       |       |       |       |     |      |      |       |     |      | 0.78 |     |       |     |       |      |      |      | 100   | 77              |
| S8     | 3.2  | 1        | Qz          | 99.77  |       |       | 0.23  |       |       |       |       |       |       |     |      |      |       |     |      |      |     |       |     |       |      |      |      | 100   | 120             |
| S8     | 3.2  | 2        | Kfs         | 66.35  |       | 17.90 | 0.43  |       |       |       | 0.29  | 15.02 |       |     |      |      |       |     |      |      |     |       |     |       |      |      |      | 100   | 118             |
| S8     | 3.2  | 3        | Feohy +     | 14.06  |       | 9.69  | 61.47 | 1.50  | 2.55  | 0.51  | 1.47  | 0.57  |       |     |      |      |       |     |      |      |     |       |     |       |      | 8.18 | 100  | 85    |                 |
| S8     | 3.2  | 4        | Chl + Feohy | 24.99  |       | 13.82 | 40.70 | 2.07  | 11.75 | 0.53  | 1.30  | 0.25  |       |     |      |      |       |     |      |      |     |       |     |       |      |      | 4.60 | 100   | 92              |
| S8     | 3.3  | 1        | Feohy +     | 3.55   |       | 1.61  | 92.81 |       |       | 0.57  |       |       | 1.45  |     |      |      |       |     |      |      |     |       |     |       |      |      |      | 100   | 79              |
| S8     | 3.3  | 2        | Clay        | 71.15  |       | 12.86 | 10.26 |       | 1.76  |       | 0.43  | 3.53  |       |     |      |      |       |     |      |      |     |       |     |       |      |      |      | 100   | 102             |
| S8     | 4    | 1        | Zrn         | 31.41  |       |       |       |       |       |       |       |       |       |     |      |      |       |     |      |      |     |       |     | 68.59 |      |      |      | 100   | 124             |
| S8     | 4    | 2        | Hol?        |        |       | 2.11  |       | 69.06 |       | 1.88  | 3.26  |       |       |     | 6.42 |      |       |     | 1.13 |      |     |       |     |       | 6.70 |      | 9.43 | 100   | 79              |



Table B3.1: EDS analyses for sample S8.

| Sample | Site | Position | Mineral | SiO2   | TiO2  | Al2O3 | FeO   | MnO  | MgO   | CaO   | Na2O | K2O   | P2O5 | SO3 | F | V2O5 | Cr2O3 | CoO | NiO | CuO | ZnO  | As2O3 | SrO | ZrO2  | BaO | HfO2 | WO3  | Total | Actual Total |
|--------|------|----------|---------|--------|-------|-------|-------|------|-------|-------|------|-------|------|-----|---|------|-------|-----|-----|-----|------|-------|-----|-------|-----|------|------|-------|--------------|
| S8     | 4    | 3        | Chr     |        |       | 20.28 | 17.34 |      | 13.21 |       |      |       |      |     |   |      | 49.16 |     |     |     |      |       |     |       |     |      |      | 100   | 106          |
| S8     | 4    | 4        | Qz      | 100.00 |       |       |       |      |       |       |      |       |      |     |   |      |       |     |     |     |      |       |     |       |     |      |      | 100   | 116          |
| S8     | 4    | 5        | Spl     |        |       | 30.56 | 17.00 |      | 14.52 |       |      |       |      |     |   | 0.40 | 37.51 |     |     |     |      |       |     |       |     |      |      | 100   | 107          |
| S8     | 4    | 6        | Feohy + | 6.00   |       | 2.52  | 88.06 |      |       | 0.50  |      |       | 1.64 |     |   |      | 0.53  |     |     |     | 0.76 |       |     |       |     |      |      | 100   | 78           |
| S8     | 4    | 7        | Chr     |        |       | 9.27  | 21.06 |      | 8.96  |       |      |       |      |     |   |      | 60.70 |     |     |     |      |       |     |       |     |      |      | 100   | 107          |
| S8     | 4    | 8        | Ilm     |        | 55.75 |       | 33.68 | 0.62 | 9.95  |       |      |       |      |     |   |      |       |     |     |     |      |       |     |       |     |      |      | 100   | 108          |
| S8     | 4    | 9        | Grt     | 39.49  |       | 21.11 | 30.66 | 1.28 | 3.44  | 4.02  |      |       |      |     |   |      |       |     |     |     |      |       |     |       |     |      |      | 100   | 115          |
| S8     | 4    | 10       | Chr     |        |       | 11.88 | 21.83 |      | 9.44  |       |      |       |      |     |   |      | 56.84 |     |     |     |      |       |     |       |     |      |      | 100   | 106          |
| S8     | 4    | 11       | Qz      | 100.00 |       |       |       |      |       |       |      |       |      |     |   |      |       |     |     |     |      |       |     |       |     |      |      | 100   | 121          |
| S8     | 4    | 12       | Ep      | 39.51  |       | 23.77 | 10.73 |      | 0.74  | 22.04 |      | 0.21  |      |     |   |      |       |     |     |     |      |       |     |       |     |      |      | 97    | 106          |
| S8     | 4    | 13       | Dol     |        |       |       |       |      | 22.45 | 31.55 |      |       |      |     |   |      |       |     |     |     |      |       |     |       |     |      |      | 54    | 59           |
| S8     | 4    | 14       | TiO2    |        | 99.39 |       | 0.61  |      |       |       |      |       |      |     |   |      |       |     |     |     |      |       |     |       |     |      |      | 100   | 112          |
| S8     | 4    | 15       | Ep      | 40.56  |       | 20.06 | 3.56  |      |       | 32.82 |      |       |      |     |   |      |       |     |     |     |      |       |     |       |     |      |      | 97    | 117          |
| S8     | 4    | 16       | Ep      | 39.39  |       | 25.91 | 9.54  |      |       | 22.15 |      |       |      |     |   |      |       |     |     |     |      |       |     |       |     |      |      | 97    | 108          |
| S8     | 4    | 17       | Qz      | 100.00 |       |       |       |      |       |       |      |       |      |     |   |      |       |     |     |     |      |       |     |       |     |      |      | 100   | 122          |
| S8     | 4    | 18       | TiO2 +  | 2.68   | 96.52 |       | 0.80  |      |       |       |      |       |      |     |   |      |       |     |     |     |      |       |     |       |     |      |      | 100   | 108          |
| S8     | 4.2  | 1        | Qz      | 99.67  |       |       | 0.33  |      |       |       |      |       |      |     |   |      |       |     |     |     |      |       |     |       |     |      |      | 100   | 118          |
| S8     | 4.2  | 2        | Chl +   | 39.76  | 0.42  | 18.15 | 30.95 | 0.78 | 1.60  | 1.10  | 1.14 | 1.62  |      |     |   |      |       |     |     |     |      |       |     |       |     | 4.47 | 100  | 94    |              |
| S8     | 4.2  | 3        | Sd +    | 3.56   |       | 3.58  | 40.14 | 1.29 | 0.45  | 0.66  | 0.63 |       | 1.01 |     |   |      |       |     |     |     |      |       |     |       |     | 4.67 | 56   | 51    |              |
| S8     | 4.2  | 4        | Kfs     | 66.11  |       | 17.95 | 0.32  |      |       |       | 1.06 | 14.56 |      |     |   |      |       |     |     |     |      |       |     |       |     |      |      | 100   | 117          |
| S8     | 4.2  | 5        | Ep      | 40.44  |       | 25.88 | 8.01  | 0.36 |       | 22.31 |      |       |      |     |   |      |       |     |     |     |      |       |     |       |     |      |      | 97    | 109          |
| S8     | 4.3  | 1        | TiO2 +  | 1.13   | 95.68 |       | 0.37  |      |       | 1.95  |      |       |      |     |   |      | 0.87  |     |     |     |      |       |     |       |     |      |      | 100   | 108          |
| S8     | 4.3  | 2        | ?Grt    | 31.74  | 10.11 | 15.51 | 19.74 |      | 15.39 | 6.24  |      |       |      |     |   |      | 1.26  |     |     |     |      |       |     |       |     |      |      | 100   | 102          |
| S8     | 4.3  | 3        | Ttn     | 32.15  | 37.82 | 1.31  | 1.40  |      | 0.69  | 26    |      |       |      |     |   |      |       |     |     |     |      |       |     |       |     |      |      | 100   | 110          |
| S8     | 5    | 1        | Zrn     | 31.03  |       |       |       |      |       |       |      |       |      |     |   |      |       |     |     |     |      |       |     | 66.91 |     | 2.06 | 100  | 121   |              |
| S8     | 5    | 2        | Zrn     | 31.35  |       |       | 0.35  |      |       |       |      |       |      |     |   |      |       |     |     |     |      |       |     | 68.29 |     |      | 100  | 120   |              |
| S8     | 5    | 3        | Grt     | 39.45  |       | 20.89 | 29.69 | 2.63 | 3.50  | 3.84  |      |       |      |     |   |      |       |     |     |     |      |       |     |       |     |      |      | 100   | 114          |
| S8     | 5    | 3        | Ttn     | 32.15  | 37.82 | 1.31  | 1.40  |      | 0.69  | 25.96 |      |       |      |     |   |      | 0.66  |     |     |     |      |       |     |       |     |      |      | 100   | 110          |
| S8     | 5    | 4        | Chr     |        |       | 27.46 | 16.00 |      | 14.79 |       |      |       |      |     |   |      | 41.75 |     |     |     |      |       |     |       |     |      |      | 100   | 107          |
| S8     | 5    | 5        | Spl     |        |       | 40.65 | 15.75 |      | 16.61 |       |      |       |      |     |   |      | 26.99 |     |     |     |      |       |     |       |     |      |      | 100   | 107          |
| S8     | 5    | 6        | Qz      | 99.72  |       |       | 0.28  |      |       |       |      |       |      |     |   |      |       |     |     |     |      |       |     |       |     |      |      | 100   | 116          |
| S8     | 5    | 7        | Chr     |        |       | 22.61 | 16.63 |      | 13.33 |       |      |       |      |     |   |      | 47.42 |     |     |     |      |       |     |       |     |      |      | 100   | 105          |
| S8     | 5    | 8        | Dol     |        |       |       |       |      | 22.78 | 31.22 |      |       |      |     |   |      |       |     |     |     |      |       |     |       |     |      |      | 54    | 56           |
| S8     | 5    | 9        | Qz      | 100.00 |       |       |       |      |       |       |      |       |      |     |   |      |       |     |     |     |      |       |     |       |     |      |      | 100   | 123          |
| S8     | 5    | 10       | Ep      | 40.21  |       | 26.14 | 8.08  |      |       | 22.57 |      |       |      |     |   |      |       |     |     |     |      |       |     |       |     |      |      | 97    | 114          |
| S8     | 5    | 11       | Chl     | 25.75  |       | 21.45 | 24.07 |      | 13.74 |       |      |       |      |     |   |      |       |     |     |     |      |       |     |       |     |      |      | 85    | 100          |
| S8     | 5    | 12       | Ep      | 40.03  |       | 23.64 | 10.47 | 0.45 |       | 22.42 |      |       |      |     |   |      |       |     |     |     |      |       |     |       |     |      |      | 97    | 107          |
| S8     | 5    | 13       | Chr     |        |       | 24.51 | 19.55 |      | 12.16 |       |      |       |      |     |   | 0.42 | 43.35 |     |     |     |      |       |     |       |     |      |      | 100   | 106          |
| S8     | 5    | 14       | Chr     |        |       | 10.63 | 23.14 |      | 10.46 |       |      |       |      |     |   |      | 55.77 |     |     |     |      |       |     |       |     |      |      | 100   | 106          |
| S8     | 5    | 15       | Ep      | 40.30  |       | 28.33 | 5.59  |      |       | 22.78 |      |       |      |     |   |      |       |     |     |     |      |       |     |       |     |      |      | 97    | 113          |
| S8     | 5    | 16       | Dol     |        |       |       |       |      | 24.20 | 29.80 |      |       |      |     |   |      |       |     |     |     |      |       |     |       |     |      |      | 54    | 58           |
| S8     | 5    | 17       | Feohy + | 2.42   |       | 3.28  | 84.39 |      |       | 0.39  | 0.98 |       | 1.13 |     |   |      | 0.72  |     |     |     |      |       |     |       |     |      | 6.68 | 100   | 87           |
| S8     | 5.2  | 1        | "Mag"   | 4.37   |       | 1.80  | 92.60 |      |       |       |      |       | 1.24 |     |   |      |       |     |     |     |      |       |     |       |     |      |      | 100   | 82           |

Table B3.1: EDS analyses for sample S8.

| Sample | Site | Position | Mineral    | SiO2   | TiO2  | Al2O3 | FeO   | MnO   | MgO   | CaO   | Na2O  | K2O  | P2O5  | SO3   | F    | V2O5 | Cr2O3 | CoO  | NiO | CuO  | ZnO | As2O3 | SrO | ZrO2 | BaO  | HfO2 | WO3   | Total | Actual<br>Total |
|--------|------|----------|------------|--------|-------|-------|-------|-------|-------|-------|-------|------|-------|-------|------|------|-------|------|-----|------|-----|-------|-----|------|------|------|-------|-------|-----------------|
| S8     | 5.2  | 2        | Feohy +    | 6.47   | 0.82  | 4.26  | 69.78 |       |       | 0.83  | 0.83  |      | 2.60  |       |      |      |       |      |     |      |     |       |     |      |      |      | 14.40 | 100   | 76              |
| S8     | 5.2  | 3        | Qz +       | 77.58  | 0.29  | 6.24  | 1.29  | 14.06 |       |       |       |      |       |       |      |      |       | 0.54 |     |      |     |       |     |      |      |      |       | 100   | 103             |
| S8     | 5.2  | 4        | ?Chl       | 24.55  | 0.31  | 23.64 | 4.83  | 23.43 | 0.40  | 0.62  | 0.54  | 0.73 |       | 0.48  | 2.63 |      |       | 0.98 |     |      |     |       |     |      |      |      | 1.86  | 85    | 92              |
| S8     | 5.2  | 5        | Qz +       | 97.71  |       | 0.36  |       | 1.93  |       |       |       |      |       |       |      |      |       |      |     |      |     |       |     |      |      |      |       | 100   | 117             |
| S8     | 5.2  | 6        | Mnohy +    | 2.37   |       | 8.77  | 2.21  | 75.04 |       | 0.95  | 1.04  | 1.40 |       |       |      |      |       | 0.68 |     |      |     |       |     |      | 7.55 |      |       | 100   | 81              |
| S8     | 5.2  | 7        | Mn-Feohy + | 24.48  | 1.30  | 22.37 | 24.94 | 17.66 | 0.63  | 0.90  | 0.89  | 0.90 | 1.17  |       |      |      |       |      |     |      |     |       |     |      |      |      | 4.74  | 100   | 84              |
| S8     | 5.3  | 1        | ?Clay      | 68.86  |       | 11.35 | 11.98 |       | 3.23  | 0.33  | 0.68  | 3.56 |       |       |      |      |       |      |     |      |     |       |     |      |      |      |       | 100   | 97              |
| S8     | 5.3  | 2        | Feohy +    | 5.54   |       | 5.72  | 83.78 |       |       | 0.44  |       |      | 3.83  |       |      |      |       |      |     | 0.69 |     |       |     |      |      |      |       | 100   | 80              |
| S8     | 5.3  | 3        | "Mag" +    | 3.04   |       | 0.85  | 93.43 | 1.17  |       | 0.42  |       |      | 1.08  |       |      |      |       |      |     |      |     |       |     |      |      |      |       | 100   | 80              |
| S8     | 5.3  | 4        | Qz +       | 93.18  | 0.27  | 3.00  | 2.16  |       | 0.46  |       |       | 0.92 |       |       |      |      |       |      |     |      |     |       |     |      |      |      |       | 100   | 110             |
| S8     | 5.3  | 5        | "Mag" +    | 3.24   |       | 1.06  | 93.72 | 0.82  |       |       |       |      | 1.15  |       |      |      |       |      |     |      |     |       |     |      |      |      |       | 100   | 82              |
| S8     | 5.3  | 6        | Feohy +    | 5.52   |       | 7.05  | 81.72 |       |       |       | 0.98  |      | 4.07  |       |      |      |       |      |     | 0.68 |     |       |     |      |      |      |       | 100   | 80              |
| S8     | 5.4  | 1        | Ab         | 68.88  |       | 19.03 | 0.27  |       |       | 0.54  | 10.84 | 0.44 |       |       |      |      |       |      |     |      |     |       |     |      |      |      |       | 100   | 118             |
| S8     | 5.4  | 2        | Ttn        | 32.81  | 37.38 | 1.36  | 0.68  |       |       | 27.77 |       |      |       |       |      |      |       |      |     |      |     |       |     |      |      |      |       | 100   | 112             |
| S8     | 6    | 1        | Chr        |        |       | 16.81 | 19.94 |       | 11.26 |       |       |      |       |       |      |      | 51.99 |      |     |      |     |       |     |      |      |      |       | 100   | 106             |
| S8     | 6    | 2        | Hbl        | 42.33  | 1.07  | 10.70 | 20.93 |       | 8.23  | 12.02 | 1.16  | 0.56 |       |       |      |      |       |      |     |      |     |       |     |      |      |      |       | 97    | 84              |
| S8     | 6    | 3        | Ilm        |        | 57.45 |       | 40.65 | 1.90  |       |       |       |      |       |       |      |      |       |      |     |      |     |       |     |      |      |      |       | 100   | 100             |
| S8     | 6    | 4        | Qz         | 100.00 |       |       |       |       |       |       |       |      |       |       |      |      |       |      |     |      |     |       |     |      |      |      |       | 100   | 117             |
| S8     | 6    | 5        | Py +       | 4.41   |       | 0.85  | 48.96 |       |       | 0.36  | 0.60  | 0.25 |       | 44.57 |      |      |       |      |     |      |     |       |     |      |      |      |       | 100   | 135             |
| S8     | 6    | 6        | Qz +       | 97.68  |       | 1.37  |       |       |       | 0.32  | 0.64  |      |       |       |      |      |       |      |     |      |     |       |     |      |      |      |       | 100   | 120             |
| S8     | 6    | 7        | Spl        |        | 0.48  | 26.50 | 27.49 |       | 9.96  |       |       |      |       |       |      |      | 35.56 |      |     |      |     |       |     |      |      |      |       | 100   | 108             |
| S8     | 6    | 8        | "Mag"      | 3.05   |       |       | 91.87 |       |       | 0.38  |       |      |       |       |      |      |       |      |     |      |     |       |     |      |      |      | 4.69  | 100   | 88              |
| S8     | 6    | 9        | Grt        | 40.31  |       | 21.35 | 28.72 |       | 4.89  | 4.73  |       |      |       |       |      |      |       |      |     |      |     |       |     |      |      |      |       | 100   | 115             |
| S8     | 6    | 10       | Ilm        |        | 49.39 |       | 47.21 | 2.67  | 0.73  |       |       |      |       |       |      |      |       |      |     |      |     |       |     |      |      |      |       | 100   | 103             |
| S8     | 6    | 11       | Ep         | 38.56  |       | 4.01  | 21.87 | 0.51  |       | 32.05 |       |      |       |       |      |      |       |      |     |      |     |       |     |      |      |      |       | 97    | 107             |
| S8     | 6    | 12       | "Mag" +    | 3.99   |       |       | 92.59 | 1.22  |       | 0.50  |       |      | 1.03  |       |      |      |       |      |     | 0.67 |     |       |     |      |      |      |       | 100   | 76              |
| S8     | 6    | 13       | Dol        |        |       |       |       |       | 22.83 | 31.17 |       |      |       |       |      |      |       |      |     |      |     |       |     |      |      |      |       | 54    | 54              |
| S8     | 6    | 14       | Ep         | 40.39  |       | 20.92 | 3.40  |       |       | 32.29 |       |      |       |       |      |      |       |      |     |      |     |       |     |      |      |      |       | 97    | 108             |
| S8     | 6    | 15       | "Mag" +    | 4.54   |       | 1.07  | 92.93 |       | 1.07  | 0.38  |       |      |       |       |      |      |       |      |     |      |     |       |     |      |      |      |       | 100   | 76              |
| S8     | 6    | 16       | Grt        | 39.69  |       | 20.94 | 31.17 | 3.03  | 3.61  | 1.55  |       |      |       |       |      |      |       |      |     |      |     |       |     |      |      |      |       | 100   | 110             |
| S8     | 6    | 17       | Ap         |        |       |       | 0.35  |       |       | 46.77 | 1.29  |      | 37.24 | 2.76  | 8.71 |      |       |      |     |      |     |       |     |      |      |      | 2.89  | 100   | 100             |
| S8     | 6    | 18       | Qz         | 99.20  |       | 0.32  | 0.48  |       |       |       |       |      |       |       |      |      |       |      |     |      |     |       |     |      |      |      |       | 100   | 119             |
| S8     | 6    | 19       | Py +       | 1.64   |       |       | 52.93 |       |       | 0.26  | 0.40  |      |       | 44.77 |      |      |       |      |     |      |     |       |     |      |      |      |       | 100   | 141             |
| S8     | 6    | 20       | Grt        | 38.91  |       | 20.74 | 36.35 |       | 2.64  | 1.35  |       |      |       |       |      |      |       |      |     |      |     |       |     |      |      |      |       | 100   | 112             |
| S8     | 6    | 21       | Ilm        |        | 50.89 |       | 45.94 | 1.64  | 1.53  |       |       |      |       |       |      |      |       |      |     |      |     |       |     |      |      |      |       | 100   | 109             |
| S8     | 6    | 22       | Chl +      | 35.86  | 2.90  | 18.79 | 29.01 |       | 7.40  |       | 0.90  | 5.16 |       |       |      |      |       |      |     |      |     |       |     |      |      |      |       | 100   | 95              |
| S8     | 6.2  | 1        | Qz         | 99.41  |       |       | 0.59  |       |       |       |       |      |       |       |      |      |       |      |     |      |     |       |     |      |      |      |       | 100   | 120             |
| S8     | 6.2  | 2        | Chl +      | 26.94  | 0.31  | 16.03 | 37.48 |       | 0.44  | 0.24  | 0.59  | 0.59 | 1.01  |       |      |      |       |      |     |      |     |       |     |      |      |      | 1.36  | 85    | 88              |
| S8     | 6.2  | 3        | "Ilm" +    | 2.35   | 31.14 | 2.91  | 59.68 | 0.54  |       |       | 0.69  |      |       |       |      |      |       |      |     |      |     |       |     |      |      |      | 2.70  | 100   | 86              |
| S8     | 6.3  | 1        | Chl        | 27.83  |       | 19.81 | 20.78 | 0.42  | 16.16 |       |       |      |       |       |      |      |       |      |     |      |     |       |     |      |      |      |       | 85    | 98              |
| S8     | 6.3  | 2        | Ttn        | 33.12  | 37.49 | 1.30  | 0.52  |       |       | 27.57 |       |      |       |       |      |      |       |      |     |      |     |       |     |      |      |      |       | 100   | 111             |
| S8     | 6.3  | 3        | Qz +       | 95.84  |       | 1.47  | 0.89  |       |       | 1.80  |       |      |       |       |      |      |       |      |     |      |     |       |     |      |      |      |       | 100   | 120             |
| S8     | 6.3  | 4        | Ep         | 40.42  |       | 25.22 | 9.20  |       |       | 22.16 |       |      |       |       |      |      |       |      |     |      |     |       |     |      |      |      |       | 97    | 109             |

Table B3.1: EDS analyses for sample S8.

| Sample | Site | Position | Mineral | SiO2   | TiO2  | Al2O3 | FeO   | MnO  | MgO   | CaO   | Na2O | K2O   | P2O5  | SO3 | F     | V2O5 | Cr2O3 | CoO | NiO | CuO | ZnO | As2O3 | SrO | ZrO2 | BaO | HfO2 | WO3  | Total | Actual<br>Total |
|--------|------|----------|---------|--------|-------|-------|-------|------|-------|-------|------|-------|-------|-----|-------|------|-------|-----|-----|-----|-----|-------|-----|------|-----|------|------|-------|-----------------|
| S8     | 7    | 1        | Chr     |        | 0.42  | 20.85 | 30.63 |      | 9.31  |       |      |       |       |     |       |      | 38.80 |     |     |     |     |       |     |      |     |      |      | 100   | 108             |
| S8     | 7    | 2        | "Mag" + | 3.12   |       | 0.62  | 96.26 |      |       |       |      |       |       |     |       |      |       |     |     |     |     |       |     |      |     |      |      | 100   | 83              |
| S8     | 7    | 3        | Chr     |        |       | 24.50 | 19.36 |      | 13.03 |       |      |       |       |     |       |      | 43.11 |     |     |     |     |       |     |      |     |      |      | 100   | 112             |
| S8     | 7    | 4        | Tur     | 37.03  | 1.26  | 33.35 | 5.19  |      | 6.89  | 1.08  | 1.88 |       |       |     |       |      | 0.33  |     |     |     |     |       |     |      |     |      |      | 87    | 102             |
| S8     | 7    | 5        | Grt     | 39.69  |       | 21.03 | 29.12 | 1.71 | 3.79  | 4.66  |      |       |       |     |       |      |       |     |     |     |     |       |     |      |     |      |      | 100   | 115             |
| S8     | 7    | 6        | Chl     | 27.94  |       | 18.28 | 25.61 |      | 12.92 |       |      |       |       |     |       |      | 0.26  |     |     |     |     |       |     |      |     |      |      | 85    | 92              |
| S8     | 7    | 7        | Qz      | 100.00 |       |       |       |      |       |       |      |       |       |     |       |      |       |     |     |     |     |       |     |      |     |      |      | 100   | 121             |
| S8     | 7    | 8        | Chl     | 26.40  |       | 20.24 | 27.16 | 0.33 | 10.44 |       | 0.42 |       |       |     |       |      |       |     |     |     |     |       |     |      |     |      |      | 85    | 99              |
| S8     | 7    | 9        | Ab      | 65.29  |       | 21.91 | 0.32  |      |       | 2.87  | 9.61 |       |       |     |       |      |       |     |     |     |     |       |     |      |     |      |      | 100   | 116             |
| S8     | 7    | 10       | St      | 28.65  |       | 43.47 | 18.93 |      | 6.95  |       |      |       |       |     |       |      |       |     |     |     |     |       |     |      |     |      |      | 98    | 102             |
| S8     | 7    | 11       | Chl +   | 22.26  | 0.75  | 20.26 | 35.23 | 0.30 | 0.59  | 0.47  | 0.59 | 0.42  | 1.68  |     |       |      |       |     |     |     |     |       |     |      |     |      | 2.45 | 85    | 90              |
| S8     | 7    | 12       | Ep +    | 40.38  | 0.63  | 21.98 | 15.32 | 0.31 | 2.97  | 17.84 | 0.57 |       |       |     |       |      |       |     |     |     |     |       |     |      |     |      |      | 100   | 100             |
| S8     | 7    | 13       | TiO2    |        | 99.44 |       | 0.56  |      |       |       |      |       |       |     |       |      |       |     |     |     |     |       |     |      |     |      |      | 100   | 105             |
| S8     | 7    | 14       | "Mag" + | 3.83   |       | 1.27  | 92.77 | 0.71 |       |       |      |       | 1.42  |     |       |      |       |     |     |     |     |       |     |      |     |      |      | 100   | 79              |
| S8     | 7    | 15       | Qz      | 100.00 |       |       |       |      |       |       |      |       |       |     |       |      |       |     |     |     |     |       |     |      |     |      |      | 100   | 120             |
| S8     | 7    | 16       | Hbl     | 48.08  | 0.42  | 10.54 | 12.24 |      | 13.25 | 10.02 | 2.21 | 0.23  |       |     |       |      |       |     |     |     |     |       |     |      |     |      |      | 97    | 108             |
| S8     | 7    | 17       | Ttn     | 33.01  | 32.88 | 3.90  | 0.55  |      |       | 28.01 |      |       |       |     | 1.65  |      |       |     |     |     |     |       |     |      |     |      |      | 100   | 116             |
| S8     | 7    | 18       | Chr     |        | 0.46  | 24.32 | 18.87 |      | 15.59 |       |      |       |       |     |       |      | 40.76 |     |     |     |     |       |     |      |     |      |      | 100   | 109             |
| S8     | 7    | 19       | "Mag" + | 3.52   |       | 1.22  | 92.96 | 1.14 |       |       |      |       | 1.15  |     |       |      |       |     |     |     |     |       |     |      |     |      |      | 100   | 77              |
| S8     | 7.2  | 1        | "Mag" + | 4.62   |       | 1.43  | 91.36 | 0.59 |       | 0.52  |      |       | 0.98  |     |       |      | 0.50  |     |     |     |     |       |     |      |     |      |      | 100   | 82              |
| S8     | 7.2  | 2        | Qz +    | 84.26  | 0.27  | 6.76  | 5.37  |      | 1.16  |       | 0.29 | 1.90  |       |     |       |      |       |     |     |     |     |       |     |      |     |      |      | 100   | 111             |
| S8     | 7.3  | 1        | TiO2    | 0.62   | 99.38 |       |       |      |       |       |      |       |       |     |       |      |       |     |     |     |     |       |     |      |     |      |      | 100   | 107             |
| S8     | 7.3  | 2        | Qz +    | 98.61  | 1.39  |       |       |      |       |       |      |       |       |     |       |      |       |     |     |     |     |       |     |      |     |      |      | 100   | 121             |
| S8     | 7.3  | 3        | "Ilm"   | 1.49   | 58.81 |       | 34.41 | 5.29 |       |       |      |       |       |     |       |      |       |     |     |     |     |       |     |      |     |      |      | 100   | 102             |
| S8     | 7.4  | 1        | St      | 29.28  | 0.64  | 52.33 | 13.32 |      | 2.44  |       |      |       |       |     |       |      |       |     |     |     |     |       |     |      |     |      |      | 98    | 110             |
| S8     | 7.4  | 2        | Qz      | 99.65  |       |       | 0.35  |      |       |       |      |       |       |     |       |      |       |     |     |     |     |       |     |      |     |      |      | 100   | 121             |
| S8     | 8    | 1        | Dol     |        |       |       | 0.31  |      | 22.54 | 31.15 |      |       |       |     |       |      |       |     |     |     |     |       |     |      |     |      |      | 54    | 57              |
| S8     | 8    | 2        | TiO2    |        | 99.01 |       | 0.99  |      |       |       |      |       |       |     |       |      |       |     |     |     |     |       |     |      |     |      |      | 100   | 110             |
| S8     | 8    | 3        | Ilm     |        | 50.67 | 0.58  | 45.53 | 1.03 | 2.20  |       |      |       |       |     |       |      |       |     |     |     |     |       |     |      |     |      |      | 100   | 107             |
| S8     | 8    | 4        | Ilm     |        | 52.59 |       | 45.78 | 1.63 |       |       |      |       |       |     |       |      |       |     |     |     |     |       |     |      |     |      |      | 100   | 109             |
| S8     | 8    | 5        | Chr     |        |       | 13.59 | 16.32 |      | 11.72 |       |      |       |       |     |       |      | 58.38 |     |     |     |     |       |     |      |     |      |      | 100   | 108             |
| S8     | 8    | 6        | TiO2    |        | 99.49 |       | 0.51  |      |       |       |      |       |       |     |       |      |       |     |     |     |     |       |     |      |     |      |      | 100   | 109             |
| S8     | 8    | 7        | Mag     |        | 0.48  |       | 98.76 | 0.41 |       | 0.35  |      |       |       |     |       |      |       |     |     |     |     |       |     |      |     |      |      | 100   | 90              |
| S8     | 8    | 8        | Ilm     |        | 51.13 |       | 46.26 | 1.61 | 1.00  |       |      |       |       |     |       |      |       |     |     |     |     |       |     |      |     |      |      | 100   | 104             |
| S8     | 8    | 9        | Qz      | 100.00 |       |       |       |      |       |       |      |       |       |     |       |      |       |     |     |     |     |       |     |      |     |      |      | 100   | 118             |
| S8     | 8    | 10       | Fl?     |        |       |       |       |      |       | 83.24 |      |       |       |     | 16.76 |      |       |     |     |     |     |       |     |      |     |      |      | 100   | 61              |
| S8     | 8    | 11       | Chr     |        |       | 8.24  | 18.42 |      | 6.04  |       |      |       |       |     |       |      | 67.31 |     |     |     |     |       |     |      |     |      |      | 100   | 97              |
| S8     | 8    | 12       | Ap      |        |       |       |       |      |       | 48.95 |      |       | 44.61 |     | 4.79  |      |       |     |     |     |     |       |     |      |     |      | 1.64 | 100   | 117             |
| S8     | 8    | 13       | Ep      | 40.57  |       | 25.65 | 8.27  |      |       | 22.51 |      |       |       |     |       |      |       |     |     |     |     |       |     |      |     |      |      | 97    | 106             |
| S8     | 8    | 14       | Ep      | 39.79  |       | 21.79 | 12.79 |      |       | 22.63 |      |       |       |     |       |      |       |     |     |     |     |       |     |      |     |      |      | 97    | 105             |
| S8     | 8    | 15       | Ep + Qz | 51.83  |       | 16.67 |       | 4.79 |       | 15.62 |      |       |       |     |       |      |       |     |     |     |     |       |     |      |     |      |      | 100   | 112             |
| S8     | 8    | 16       | Kfs     | 66.91  |       | 17.97 |       |      |       |       | 0.43 | 14.69 |       |     |       |      |       |     |     |     |     |       |     |      |     |      |      | 100   | 113             |
| S8     | 8    | 17       | Qz      | 99.71  |       |       | 0.29  |      |       |       |      |       |       |     |       |      |       |     |     |     |     |       |     |      |     |      |      | 100   | 120             |

Table B3.1: EDS analyses for sample S8.

| Sample | Site | Position | Mineral      | SiO2   | TiO2  | Al2O3 | FeO   | MnO  | MgO   | CaO   | Na2O  | K2O  | P2O5  | SO3 | F    | V2O5 | Cr2O3 | CoO | NiO | CuO | ZnO | As2O3 | SrO | ZrO2  | BaO | HfO2 | WO3  | Total | Actual Total |
|--------|------|----------|--------------|--------|-------|-------|-------|------|-------|-------|-------|------|-------|-----|------|------|-------|-----|-----|-----|-----|-------|-----|-------|-----|------|------|-------|--------------|
| S8     | 8    | 18       | Ilm          |        | 53.75 |       | 41.82 | 4.43 |       |       |       |      |       |     |      |      |       |     |     |     |     |       |     |       |     |      |      | 100   | 103          |
| S8     | 8    | 19       | Grt          | 40.59  |       | 21.48 | 25.78 | 0.97 | 5.89  | 5.30  |       |      |       |     |      |      |       |     |     |     |     |       |     |       |     |      |      | 100   | 110          |
| S8     | 8    | 20       | Zrn          | 31.37  |       |       |       |      |       |       |       |      |       |     |      |      |       |     |     |     |     |       |     | 67.28 |     | 1.35 |      | 100   | 118          |
| S8     | 8    | 21       | Grt          | 40.13  |       | 21.32 | 27.75 | 0.39 | 5.02  | 5.39  |       |      |       |     |      |      |       |     |     |     |     |       |     |       |     |      |      | 100   | 112          |
| S8     | 8.2  | 1        | Ab           | 69.48  | 0.42  | 18.62 |       |      |       |       | 11.47 |      |       |     |      |      |       |     |     |     |     |       |     |       |     |      |      | 100   | 118          |
| S8     | 8.2  | 2        | TiO2         |        | 99.59 |       | 0.41  |      |       |       |       |      |       |     |      |      |       |     |     |     |     |       |     |       |     |      |      | 100   | 108          |
| S8     | 8.2  | 3        | Chl          | 26.29  | 0.77  | 21.17 | 23.62 |      | 12.67 |       |       | 0.48 |       |     |      |      |       |     |     |     |     |       |     |       |     |      |      | 85    | 99           |
| S8     | 8.3  | 1        | "Mag" +      | 4.20   |       |       | 95.80 |      |       |       |       |      |       |     |      |      |       |     |     |     |     |       |     |       |     |      |      | 100   | 78           |
| S8     | 8.3  | 2        | Qz           | 99.21  |       |       | 0.79  |      |       |       |       |      |       |     |      |      |       |     |     |     |     |       |     |       |     |      |      | 100   | 121          |
| S8     | 8.4  | 1        | "Bt"         | 35.95  | 0.66  | 19.62 | 30.14 |      | 11.75 |       | 0.66  | 1.22 |       |     |      |      |       |     |     |     |     |       |     |       |     |      |      | 100   | 95           |
| S8     | 8.4  | 2        | Qz           | 99.37  | 0.27  |       | 0.36  |      |       |       |       |      |       |     |      |      |       |     |     |     |     |       |     |       |     |      |      | 100   | 121          |
| S8     | 8.4  | 3        | "Ilm"        | 4.60   | 57.05 |       | 36.36 | 1.99 |       |       |       |      |       |     |      |      |       |     |     |     |     |       |     |       |     |      |      | 100   | 103          |
| S8     | 9    | 1        | Chr          |        |       | 12.00 | 20.55 |      | 10.97 |       |       |      |       |     |      |      | 56.47 |     |     |     |     |       |     |       |     |      |      | 100   | 104          |
| S8     | 9    | 2        | Feohy +      | 4.28   |       | 2.15  | 82.91 |      |       | 0.66  | 0.83  |      | 1.69  |     |      |      | 0.95  |     |     |     |     |       |     |       |     |      | 6.52 | 100   | 83           |
| S8     | 9    | 3        | Zrn          | 31.09  |       |       |       |      |       |       |       |      |       |     |      |      |       |     |     |     |     |       |     | 68.91 |     |      |      | 100   | 115          |
| S8     | 9    | 4        | Qz           | 100.00 |       |       |       |      |       |       |       |      |       |     |      |      |       |     |     |     |     |       |     |       |     |      |      | 100   | 119          |
| S8     | 9    | 5        | Ep           | 40.37  |       | 20.84 | 1.61  | 0.52 |       | 33.66 |       |      |       |     |      |      |       |     |     |     |     |       |     |       |     |      |      | 97    | 114          |
| S8     | 9    | 6        | Feohy + Qz + | 20.07  |       | 10.56 | 61.72 |      | 0.70  | 0.38  | 0.68  | 0.80 |       |     |      |      |       |     |     |     |     |       |     |       |     | 5.08 | 100  | 90    |              |
| S8     | 9    | 7        | Grt          | 39.73  | 0.33  | 20.73 | 23.52 | 6.57 | 0.87  | 8.25  |       |      |       |     |      |      |       |     |     |     |     |       |     |       |     |      |      | 100   | 113          |
| S8     | 9    | 8        | Spl          |        |       | 29.08 | 18.34 |      | 13.69 |       |       |      |       |     |      | 0.39 | 38.49 |     |     |     |     |       |     |       |     |      |      | 100   | 109          |
| S8     | 9    | 9        | TiO2         | 0.99   | 92.40 |       | 6.61  |      |       |       |       |      |       |     |      |      |       |     |     |     |     |       |     |       |     |      |      | 100   | 102          |
| S8     | 9    | 10       | Tur          | 38.43  | 0.86  | 29.68 | 6.37  |      | 8.36  | 0.59  | 2.71  |      |       |     |      |      |       |     |     |     |     |       |     |       |     |      |      | 87    | 98           |
| S8     | 9    | 11       | Ap           |        |       |       |       |      |       | 49.77 |       |      | 44.92 |     | 5.31 |      |       |     |     |     |     |       |     |       |     |      |      | 100   | 117          |
| S8     | 9    | 12       | Ep           | 39.99  |       | 21.04 | 13.21 | 0.28 |       | 22.48 |       |      |       |     |      |      |       |     |     |     |     |       |     |       |     |      |      | 97    | 107          |
| S8     | 9    | 13       | Grt          | 39.88  |       | 21.17 | 28.27 | 0.69 | 2.74  | 7.25  |       |      |       |     |      |      |       |     |     |     |     |       |     |       |     |      |      | 100   | 111          |
| S8     | 9    | 14       | Ep           | 40.15  |       | 24.27 | 10.09 |      |       | 22.49 |       |      |       |     |      |      |       |     |     |     |     |       |     |       |     |      |      | 97    | 108          |
| S8     | 9    | 15       | Spl          |        | 0.48  | 30.45 | 27.83 |      | 11.45 |       |       |      |       |     |      |      | 29.78 |     |     |     |     |       |     |       |     |      |      | 100   | 108          |
| S8     | 9    | 16       | Ilm          |        | 53.96 |       | 44.32 | 1.72 |       |       |       |      |       |     |      |      |       |     |     |     |     |       |     |       |     |      |      | 100   | 109          |
| S8     | 9    | 17       | Chr          |        |       | 0.66  | 36.73 |      | 4.05  |       |       |      |       |     |      |      | 58.56 |     |     |     |     |       |     |       |     |      |      | 100   | 101          |
| S8     | 9    | 18       | Qz           | 98.60  |       | 0.72  | 0.69  |      |       |       |       |      |       |     |      |      |       |     |     |     |     |       |     |       |     |      |      | 100   | 98           |
| S8     | 9    | 19       | Ep           | 39.50  |       | 20.64 | 10.67 | 2.60 |       | 23.59 |       |      |       |     |      |      |       |     |     |     |     |       |     |       |     |      |      | 97    | 114          |
| S8     | 9    | 20       | Grt          | 39.35  |       | 20.80 | 30.60 | 1.55 | 1.22  | 6.49  |       |      |       |     |      |      |       |     |     |     |     |       |     |       |     |      |      | 100   | 114          |
| S8     | 9    | 21       | Ep           | 40.49  |       | 25.83 | 8.45  | 0.44 |       | 21.80 |       |      |       |     |      |      |       |     |     |     |     |       |     |       |     |      |      | 97    | 110          |
| S8     | 9    | 22       | Grt          | 40.61  |       | 21.48 | 28.39 | 0.32 | 6.27  | 2.91  |       |      |       |     |      |      |       |     |     |     |     |       |     |       |     |      |      | 100   | 111          |
| S8     | 9.2  | 1        | Chl + Feohy  | 25.03  | 0.43  | 17.42 | 51.80 |      |       | 0.71  |       | 0.48 | 4.14  |     |      |      |       |     |     |     |     |       |     |       |     |      |      | 100   | 89           |
| S8     | 9.2  | 2        | Qz           | 99.23  |       |       | 0.53  |      |       | 0.24  |       |      |       |     |      |      |       |     |     |     |     |       |     |       |     |      |      | 100   | 119          |
| S8     | 9.2  | 3        | Chl + Feohy  | 34.11  |       | 1.36  | 59.39 |      |       | 0.49  |       |      | 4.64  |     |      |      |       |     |     |     |     |       |     |       |     |      |      | 100   | 93           |
| S8     | 9.3  | 1        | TiO2         |        | 99.58 |       | 0.42  |      |       |       |       |      |       |     |      |      |       |     |     |     |     |       |     |       |     |      |      | 100   | 107          |
| S8     | 9.3  | 2        | Qz           | 97.72  | 0.35  | 1.27  | 0.29  |      |       |       |       | 0.37 |       |     |      |      |       |     |     |     |     |       |     |       |     |      |      | 100   | 120          |
| S8     | 9.3  | 3        | Ilm +        | 14.17  | 45.64 |       | 34.72 | 5.47 |       |       |       |      |       |     |      |      |       |     |     |     |     |       |     |       |     |      |      | 100   | 111          |
| S8     | 9.3  | 4        | Chl +        | 31.33  | 0.76  | 19.91 | 21.43 | 0.41 | 9.15  |       |       | 2.01 |       |     |      |      |       |     |     |     |     |       |     |       |     |      |      | 85    | 104          |
| S8     | 9.4  | 1        | Qz           | 99.05  |       | 0.37  | 0.58  |      |       |       |       |      |       |     |      |      |       |     |     |     |     |       |     |       |     |      |      | 100   | 122          |
| S8     | 9.4  | 2        | Chl          | 31.71  |       | 16.39 | 20.57 |      | 15.72 |       | 0.35  |      |       |     |      |      | 0.25  |     |     |     |     |       |     |       |     |      |      | 85    | 102          |



Table B3.1: EDS analyses for sample S8.

| Sample | Site | Position | Mineral     | SiO2   | TiO2  | Al2O3 | FeO   | MnO  | MgO   | CaO   | Na2O | K2O  | P2O5  | SO3  | F    | V2O5 | Cr2O3 | CoO | NiO | CuO | ZnO  | As2O3 | SrO | ZrO2  | BaO | HfO2 | WO3   | Total | Actual<br>Total |
|--------|------|----------|-------------|--------|-------|-------|-------|------|-------|-------|------|------|-------|------|------|------|-------|-----|-----|-----|------|-------|-----|-------|-----|------|-------|-------|-----------------|
| S8     | 9.4  | 3        | Grt         | 39.91  |       | 21.04 | 31.69 |      | 3.06  | 4.29  |      |      |       |      |      |      |       |     |     |     |      |       |     |       |     |      |       | 100   | 114             |
| S8     | 9.4  | 4        | Chl         | 28.88  |       | 17.64 | 22.36 | 0.26 | 15.85 |       |      |      |       |      |      |      |       |     |     |     |      |       |     |       |     |      |       | 85    | 97              |
| S8     | 9.4  | 5        | Grt         | 39.58  |       | 21.00 | 31.97 | 0.89 | 3.03  | 3.53  |      |      |       |      |      |      |       |     |     |     |      |       |     |       |     |      |       | 100   | 114             |
| S8     | 9.4  | 6        | Qz +        | 95.86  |       | 1.61  | 2.26  |      |       | 0.27  |      |      |       |      |      |      |       |     |     |     |      |       |     |       |     |      |       | 100   | 117             |
| S8     | 10   | 1        | TiO2        |        | 99.39 |       | 0.61  |      |       |       |      |      |       |      |      |      |       |     |     |     |      |       |     |       |     |      |       | 100   | 105             |
| S8     | 10   | 2        | Ap          |        |       |       |       |      |       | 45.95 | 1.35 |      | 37.77 | 2.17 | 8.53 |      |       |     |     |     |      |       |     |       |     |      | 4.24  | 100   | 112             |
| S8     | 10   | 3        | "Mag" +     | 1.94   |       | 0.68  | 93.57 |      |       | 0.47  |      |      |       |      |      |      |       |     |     |     |      |       |     |       |     |      | 3.34  | 100   | 87              |
| S8     | 10   | 4        | Chr         |        |       | 8.97  | 21.77 |      | 8.73  |       |      |      |       |      |      |      | 60.53 |     |     |     |      |       |     |       |     |      |       | 100   | 104             |
| S8     | 10   | 5        | Ttn +       | 37.96  | 11.06 | 16.21 | 11.00 |      |       | 23.78 |      |      |       |      |      |      |       |     |     |     |      |       |     |       |     |      |       | 100   | 109             |
| S8     | 10   | 6        | TiO2        |        | 99.66 |       | 0.34  |      |       |       |      |      |       |      |      |      |       |     |     |     |      |       |     |       |     |      |       | 100   | 106             |
| S8     | 10   | 7        | Ap          |        |       | 0.56  |       |      |       | 46.89 | 1.02 |      | 38.91 | 1.41 | 9.00 |      |       |     |     |     |      |       |     |       |     |      | 2.20  | 100   | 115             |
| S8     | 10   | 8        | Mag" +      | 3.44   |       | 0.97  | 93.12 |      |       | 0.49  |      |      | 1.98  |      |      |      |       |     |     |     |      |       |     |       |     |      |       | 100   | 86              |
| S8     | 10   | 9        | Chr         | 1.82   |       | 12.05 | 26.67 |      | 7.35  |       |      |      |       |      |      | 0.58 | 51.53 |     |     |     |      |       |     |       |     |      |       | 100   | 99              |
| S8     | 10   | 10       | Feohy +     |        | 8.57  | 2.52  | 85.92 | 1.64 | 1.35  |       |      |      |       |      |      |      |       |     |     |     |      |       |     |       |     |      |       | 100   | 103             |
| S8     | 10   | 11       | Chr         |        |       | 13.62 | 28.58 |      | 7.34  |       |      |      |       |      |      |      | 50.46 |     |     |     |      |       |     |       |     |      |       | 100   | 109             |
| S8     | 10   | 12       | Grt         | 40.08  |       | 21.02 | 28.11 | 0.47 | 2.84  | 7.48  |      |      |       |      |      |      |       |     |     |     |      |       |     |       |     |      |       | 100   | 114             |
| S8     | 10   | 13       | Ilm +       | 14.10  | 48.00 | 5.21  | 27.64 | 1.41 | 1.94  |       | 1.27 | 0.44 |       |      |      |      |       |     |     |     |      |       |     |       |     |      |       | 100   | 91              |
| S8     | 10   | 14       | Chl         | 26.04  |       | 21.81 | 22.36 |      | 14.79 |       |      |      |       |      |      |      |       |     |     |     |      |       |     |       |     |      |       | 85    | 101             |
| S8     | 10   | 15       | Feohy +     |        | 9.31  | 8.73  | 75.69 | 0.39 | 5.22  |       |      |      |       |      |      | 0.65 |       |     |     |     |      |       |     |       |     |      |       | 100   | 105             |
| S8     | 10   | 16       | Ep          | 39.98  |       | 24.17 | 10.10 | 0.39 |       | 22.37 |      |      |       |      |      |      |       |     |     |     |      |       |     |       |     |      |       | 97    | 113             |
| S8     | 10   | 17       | Ap          |        |       |       | 0.46  |      |       | 47.95 | 1.15 |      | 39.19 | 0.82 | 7.51 |      |       |     |     |     |      |       |     |       |     |      | 2.92  | 100   | 110             |
| S8     | 10   | 18       | Spl         |        |       | 34.39 | 15.54 |      | 16.12 |       |      |      |       |      |      |      | 33.96 |     |     |     |      |       |     |       |     |      |       | 100   | 114             |
| S8     | 10   | 19       | Grt         | 40.24  |       | 21.15 | 29.91 |      | 5.18  | 3.53  |      |      |       |      |      |      |       |     |     |     |      |       |     |       |     |      |       | 100   | 111             |
| S8     | 10   | 20       | "Ilm"       |        | 58.35 |       | 37.47 | 4.18 |       |       |      |      |       |      |      |      |       |     |     |     |      |       |     |       |     |      |       | 100   | 101             |
| S8     | 10   | 21       | Qz          | 99.77  |       |       | 0.23  |      |       |       |      |      |       |      |      |      |       |     |     |     |      |       |     |       |     |      |       | 100   | 116             |
| S8     | 10   | 22       | TiO2        |        | 99.49 |       | 0.51  |      |       |       |      |      |       |      |      |      |       |     |     |     |      |       |     |       |     |      |       | 100   | 105             |
| S8     | 10.2 | 1        | Chl +       | 24.64  | 0.55  | 15.17 | 53.52 | 0.66 |       | 0.51  | 0.65 | 0.59 | 0.95  |      |      |      |       |     |     |     |      |       |     |       |     |      | 2.76  | 100   | 82              |
| S8     | 10.2 | 2        | Feohy +     | 5.36   |       | 3.54  | 86.81 | 1.57 |       | 0.36  |      |      | 2.35  |      |      |      |       |     |     |     |      |       |     |       |     |      |       | 100   | 80              |
| S8     | 10.2 | 3        | Chl         | 28.69  | 0.49  | 18.70 | 31.46 | 0.40 | 0.70  | 0.36  | 0.65 | 0.82 | 0.71  |      |      |      |       |     |     |     |      |       |     |       |     |      | 2.02  | 85    | 77              |
| S8     | 10.2 | 4        | Qz +        | 88.13  |       | 2.87  | 4.09  |      | 4.91  |       |      |      |       |      |      |      |       |     |     |     |      |       |     |       |     |      |       | 100   | 122             |
| S8     | 10.2 | 5        | Chl + Feohy | 20.33  |       | 8.26  | 60.15 |      | 1.57  | 0.76  | 0.62 | 1.11 | 1.27  |      |      |      |       |     |     |     |      |       |     |       |     |      | 5.93  | 100   | 89              |
| S8     | 10.2 | 6        | Chl + Feohy | 20.22  | 0.46  | 14.18 | 56.55 | 0.91 | 0.55  | 0.87  |      | 0.55 | 1.57  |      |      |      |       |     |     |     |      |       |     |       |     |      | 4.14  | 100   | 87              |
| S8     | 10.3 | 1        | "Mag" +     | 2.77   |       | 1.32  | 94.49 |      |       | 0.45  |      |      | 0.97  |      |      |      |       |     |     |     |      |       |     |       |     |      |       | 100   | 79              |
| S8     | 10.3 | 2        | "Mag" +     | 3.24   |       | 1.00  | 94.17 |      |       | 0.43  |      |      | 1.16  |      |      |      |       |     |     |     |      |       |     |       |     |      |       | 100   | 79              |
| S8     | 10.3 | 3        | Qz + Ill    | 94.28  |       | 2.55  | 2.56  |      |       |       |      | 0.61 |       |      |      |      |       |     |     |     |      |       |     |       |     |      |       | 100   | 108             |
| S8     | 10.3 | 4        | Feohy +     | 5.15   | 0.51  | 5.74  | 72.01 |      |       | 1.43  |      |      | 3.56  |      |      |      |       |     |     |     |      |       |     |       |     |      | 11.60 | 100   | 78              |
| S8     | 11   | 1        | Zrn         | 31.69  |       |       |       |      |       |       |      |      |       |      |      |      |       |     |     |     |      |       |     | 68.31 |     |      |       | 100   | 118             |
| S8     | 11   | 2        | Grt         | 39.12  |       | 20.59 | 33.10 | 1.65 | 1.63  | 3.91  |      |      |       |      |      |      |       |     |     |     |      |       |     |       |     |      |       | 100   | 113             |
| S8     | 11   | 3        | Ap          |        |       | 1.01  | 0.48  |      |       | 45.44 | 1.31 |      | 39.20 | 2.46 | 7.48 |      |       |     |     |     |      |       |     |       |     |      | 2.62  | 100   | 112             |
| S8     | 11   | 4        | Spl         |        |       | 31.14 | 15.94 |      | 14.76 |       |      |      |       |      |      |      | 38.15 |     |     |     |      |       |     |       |     |      |       | 100   | 113             |
| S8     | 11   | 5        | Feohy +     | 5.84   |       | 1.90  | 89.52 |      |       |       | 0.66 |      | 1.31  |      |      |      |       |     |     |     | 0.76 |       |     |       |     |      |       | 100   | 77              |
| S8     | 11   | 6        | Qz          | 100.00 |       |       |       |      |       |       |      |      |       |      |      |      |       |     |     |     |      |       |     |       |     |      |       | 100   | 116             |
| S8     | 11   | 7        | Dol         |        |       |       |       |      | 22.42 | 31.58 |      |      |       |      |      |      |       |     |     |     |      |       |     |       |     |      |       | 54    | 55              |

Table B3.1: EDS analyses for sample S8.

| Sample | Site | Position | Mineral    | SiO2   | TiO2  | Al2O3 | FeO   | MnO  | MgO   | CaO   | Na2O  | K2O   | P2O5  | SO3   | F     | V2O5 | Cr2O3 | CoO | NiO | CuO | ZnO | As2O3 | SrO | ZrO2 | BaO | HfO2 | WO3  | Total | Actual<br>Total |
|--------|------|----------|------------|--------|-------|-------|-------|------|-------|-------|-------|-------|-------|-------|-------|------|-------|-----|-----|-----|-----|-------|-----|------|-----|------|------|-------|-----------------|
| S8     | 11   | 8        | TiO2       | 0.69   | 98.65 |       | 0.65  |      |       |       |       |       |       |       |       |      |       |     |     |     |     |       |     |      |     |      |      | 100   | 106             |
| S8     | 11   | 9        | Ms         | 49.47  | 0.38  | 22.75 | 9.12  |      | 2.33  |       |       | 10.95 |       |       |       |      |       |     |     |     |     |       |     |      |     |      |      | 95    | 108             |
| S8     | 11   | 10       | Chr        |        |       | 27.27 | 21.60 |      | 12.56 |       |       |       |       |       |       | 0.49 | 38.08 |     |     |     |     |       |     |      |     |      |      | 100   | 112             |
| S8     | 11   | 11       | Chl        | 24.68  |       | 21.61 | 29.91 |      | 8.80  |       |       |       |       |       |       |      |       |     |     |     |     |       |     |      |     |      |      | 85    | 97              |
| S8     | 11   | 12       | Qz         | 100.00 |       |       |       |      |       |       |       |       |       |       |       |      |       |     |     |     |     |       |     |      |     |      |      | 100   | 127             |
| S8     | 11   | 13       | Ep +       | 42.32  |       | 24.67 | 8.33  |      |       | 20.45 | 1.23  |       |       |       |       |      |       |     |     |     |     |       |     |      |     |      |      | 97    | 113             |
| S8     | 11   | 14       | Ilm        |        | 53.46 |       | 44.78 | 1.76 |       |       |       |       |       |       |       |      |       |     |     |     |     |       |     |      |     |      |      | 100   | 106             |
| S8     | 11.2 | 1        | "Mag" +    | 4.41   |       | 1.40  | 92.44 |      |       | 0.53  |       |       | 1.21  |       |       |      |       |     |     |     |     |       |     |      |     |      |      | 100   | 79              |
| S8     | 11.2 | 2        | "Mag" +    | 5.23   |       | 1.45  | 91.58 |      |       | 0.44  |       |       | 1.30  |       |       |      |       |     |     |     |     |       |     |      |     |      |      | 100   | 79              |
| S8     | 11.3 | 1        | Py         | 0.21   |       |       | 28.52 |      |       |       | 0.59  |       |       | 70.69 |       |      |       |     |     |     |     |       |     |      |     |      |      | 100   | 231             |
| S8     | 11.3 | 2        | Fl         | 2.09   |       | 0.45  | 1.49  |      | 0.99  | 50.91 | 0.40  | 0.38  |       |       | 43.29 |      |       |     |     |     |     |       |     |      |     |      |      | 100   | 109             |
| S8     | 11.3 | 3        | Feohy +    | 5.90   |       | 2.43  | 78.85 |      |       | 1.26  | 1.26  |       | 1.32  |       |       |      |       |     |     |     |     |       |     |      |     |      | 8.97 | 100   | 83              |
| S8     | 11.4 | 1        | Ilm        |        | 53.52 |       | 37.91 | 8.57 |       |       |       |       |       |       |       |      |       |     |     |     |     |       |     |      |     |      |      | 100   | 107             |
| S8     | 11.4 | 2        | TiO2       |        | 99.13 |       | 0.87  |      |       |       |       |       |       |       |       |      |       |     |     |     |     |       |     |      |     |      |      | 100   | 107             |
| S8     | 11.4 | 3        | Chl + TiO2 | 24.02  | 24.20 | 18.73 | 19.79 | 0.70 | 12.00 | 0.23  |       | 0.33  |       |       |       |      |       |     |     |     |     |       |     |      |     |      |      | 100   | 111             |
| S8     | 12   | 1        | Ilm        |        | 52.87 |       | 46.15 | 0.99 |       |       |       |       |       |       |       |      |       |     |     |     |     |       |     |      |     |      |      | 100   | 104             |
| S8     | 12   | 2        | TiO2       |        | 99.56 |       | 0.44  |      |       |       |       |       |       |       |       |      |       |     |     |     |     |       |     |      |     |      |      | 100   | 104             |
| S8     | 12   | 3        | Dol        |        |       |       | 10.10 | 0.50 | 14.71 | 28.68 |       |       |       |       |       |      |       |     |     |     |     |       |     |      |     |      |      | 54    | 56              |
| S8     | 12   | 4        | Grt        | 39.17  |       | 20.71 | 34.63 | 1.71 | 3.14  | 0.65  |       |       |       |       |       |      |       |     |     |     |     |       |     |      |     |      |      | 100   | 108             |
| S8     | 12   | 5        | "Mag"      | 3.99   |       | 3.72  | 91.96 |      |       | 0.33  |       |       |       |       |       |      |       |     |     |     |     |       |     |      |     |      |      | 100   | 76              |
| S8     | 12   | 6        | Dol        |        |       |       |       |      | 22.72 | 31.28 |       |       |       |       |       |      |       |     |     |     |     |       |     |      |     |      |      | 54    | 55              |
| S8     | 12   | 7        | Chr        | 7.55   | 1.09  | 6.11  | 32.38 | 1.18 | 2.47  | 1.33  | 1.91  |       |       | 1.09  |       |      | 43.25 |     |     |     |     |       |     |      |     |      | 1.64 | 100   | 55              |
| S8     | 12   | 8        | Ep         | 39.87  |       | 23.08 | 11.65 |      |       | 22.41 |       |       |       |       |       |      |       |     |     |     |     |       |     |      |     |      |      | 97    | 111             |
| S8     | 12   | 9        | Grt        | 38.99  |       | 20.96 | 28.97 | 7.27 | 2.62  | 1.20  |       |       |       |       |       |      |       |     |     |     |     |       |     |      |     |      |      | 100   | 117             |
| S8     | 12   | 10       | Chr        |        |       | 10.89 | 23.74 |      | 9.30  |       |       |       |       |       |       |      | 56.07 |     |     |     |     |       |     |      |     |      |      | 100   | 112             |
| S8     | 12   | 11       | Feohy +    |        | 10.46 | 2.53  | 83.36 | 1.92 | 1.73  |       |       |       |       |       |       |      |       |     |     |     |     |       |     |      |     |      |      | 100   | 103             |
| S8     | 12   | 12       | Ap         |        |       |       |       |      |       | 49.37 |       |       | 44.57 |       | 6.06  |      |       |     |     |     |     |       |     |      |     |      |      | 100   | 124             |
| S8     | 12   | 13       | "Mag" +    | 2.39   |       | 2.13  | 91.68 | 1.33 |       | 0.39  |       |       | 2.08  |       |       |      |       |     |     |     |     |       |     |      |     |      |      | 100   | 83              |
| S8     | 12   | 14       | Ap         |        |       |       |       |      |       | 47.92 |       |       | 44.05 |       | 6.47  |      |       |     |     |     |     |       |     |      |     |      | 1.56 | 100   | 123             |
| S8     | 12   | 15       | Ep         | 41.24  |       | 28.44 | 1.78  | 0.32 | 2.37  | 22.84 |       |       |       |       |       |      |       |     |     |     |     |       |     |      |     |      |      | 97    | 103             |
| S8     | 12   | 16       | Grt?       | 41.79  |       | 21.26 | 20.92 | 0.37 | 7.44  | 8.21  |       |       |       |       |       |      |       |     |     |     |     |       |     |      |     |      |      | 100   | 110             |
| S8     | 12   | 17       | Ep         | 40.37  |       | 23.42 | 10.77 |      |       | 22.45 |       |       |       |       |       |      |       |     |     |     |     |       |     |      |     |      |      | 97    | 103             |
| S8     | 12   | 18       | Ep         | 39.90  | 0.73  | 17.93 | 4.87  |      |       | 33.57 |       |       |       |       |       |      |       |     |     |     |     |       |     |      |     |      |      | 97    | 111             |
| S8     | 12.2 | 1        | Qz         | 99.20  | 0.80  |       |       |      |       |       |       |       |       |       |       |      |       |     |     |     |     |       |     |      |     |      |      | 100   | 121             |
| S8     | 12.2 | 2        | Chl + ?Ab  | 57.71  | 1.58  | 11.37 | 10.93 |      | 9.95  | 1.40  | 7.06  |       |       |       |       |      |       |     |     |     |     |       |     |      |     |      |      | 100   | 113             |
| S8     | 12.2 | 3        | Ttn +      | 32.31  | 40.10 | 1.32  | 0.30  |      |       | 25.97 |       |       |       |       |       |      |       |     |     |     |     |       |     |      |     |      |      | 100   | 110             |
| S8     | 12.2 | 4        | TiO2       |        | 99.53 |       | 0.47  |      |       |       |       |       |       |       |       |      |       |     |     |     |     |       |     |      |     |      |      | 100   | 107             |
| S8     | 12.3 | 1        | Qz         | 99.77  |       |       | 0.23  |      |       |       |       |       |       |       |       |      |       |     |     |     |     |       |     |      |     |      |      | 100   | 120             |
| S8     | 12.3 | 2        | Feohy +    | 10.59  | 1.40  | 10.03 | 70.80 |      |       | 0.61  | 0.70  |       | 2.30  |       |       |      |       |     |     |     |     |       |     |      |     |      | 3.57 | 100   | 81              |
| S8     | 12.4 | 1        | TiO2 +     | 9.77   | 79.79 | 2.52  | 0.36  |      |       | 7.57  |       |       |       |       |       |      |       |     |     |     |     |       |     |      |     |      |      | 100   | 110             |
| S8     | 12.4 | 2        | Qz         | 99.31  | 0.69  |       |       |      |       |       |       |       |       |       |       |      |       |     |     |     |     |       |     |      |     |      |      | 100   | 122             |
| S8     | 12.4 | 3        | Ab         | 68.48  | 0.42  | 18.89 | 0.24  |      |       | 0.50  | 11.23 | 0.24  |       |       |       |      |       |     |     |     |     |       |     |      |     |      |      | 100   | 124             |
| S8     | 12.4 | 4        | TiO2       |        | 99.06 |       | 0.53  |      |       | 0.42  |       |       |       |       |       |      |       |     |     |     |     |       |     |      |     |      |      | 100   | 108             |

Table B3.1: EDS analyses for sample S8.

| Sample | Site | Position | Mineral | SiO2   | TiO2  | Al2O3 | FeO   | MnO   | MgO   | CaO   | Na2O  | K2O  | P2O5  | SO3  | F    | V2O5 | Cr2O3 | CoO | NiO  | CuO | ZnO | As2O3 | SrO | ZrO2 | BaO | HfO2 | WO3  | Total | Actual Total |
|--------|------|----------|---------|--------|-------|-------|-------|-------|-------|-------|-------|------|-------|------|------|------|-------|-----|------|-----|-----|-------|-----|------|-----|------|------|-------|--------------|
| S8     | 12.4 | 5        | Ttn     | 32.07  | 30.12 | 5.81  | 8.31  |       | 1.75  | 21.41 |       | 0.52 |       |      |      |      |       |     |      |     |     |       |     |      |     |      |      | 100   | 105          |
| S8     | 13   | 1        | Ilm     |        | 53.57 |       | 45.37 | 1.06  |       |       |       |      |       |      |      |      |       |     |      |     |     |       |     |      |     |      |      | 100   | 104          |
| S8     | 13   | 2        | Grt     | 39.95  |       | 20.91 | 27.26 | 0.55  | 2.14  | 9.19  |       |      |       |      |      |      |       |     |      |     |     |       |     |      |     |      |      | 100   | 111          |
| S8     | 13   | 3        | Chr     |        | 0.54  | 16.62 | 27.14 |       | 9.18  |       |       |      |       |      |      |      | 46.52 |     |      |     |     |       |     |      |     |      |      | 100   | 107          |
| S8     | 13   | 4        | Mag +   | 4.48   |       | 3.13  | 91.58 | 0.81  |       |       |       |      |       |      |      |      |       |     |      |     |     |       |     |      |     |      |      | 100   | 89           |
| S8     | 13   | 5        | Grt     | 40.10  |       | 21.54 | 25.16 | 0.60  | 4.69  | 7.90  |       |      |       |      |      |      |       |     |      |     |     |       |     |      |     |      |      | 100   | 112          |
| S8     | 13   | 6        | Feohy + |        | 6.40  | 4.31  | 85.62 | 0.70  | 2.98  |       |       |      |       |      |      |      |       |     |      |     |     |       |     |      |     |      |      | 100   | 95           |
| S8     | 13   | 7        | Chr     |        |       | 11.60 | 18.79 |       | 7.70  |       |       |      |       |      |      |      | 61.92 |     |      |     |     |       |     |      |     |      |      | 100   | 101          |
| S8     | 13   | 8        | Qz      | 100.00 |       |       |       |       |       |       |       |      |       |      |      |      |       |     |      |     |     |       |     |      |     |      |      | 100   | 117          |
| S8     | 13   | 9        | Chl     | 26.44  |       | 21.23 | 24.18 |       | 13.14 |       |       |      |       |      |      |      |       |     |      |     |     |       |     |      |     |      |      | 85    | 95           |
| S8     | 13   | 10       | Grt     | 38.82  | 0.96  | 4.24  | 22.46 | 0.69  |       | 32.83 |       |      |       |      |      |      |       |     |      |     |     |       |     |      |     |      |      | 100   | 107          |
| S8     | 13   | 11       | Ep      | 40.75  |       | 25.94 | 7.81  |       |       | 22.50 |       |      |       |      |      |      |       |     |      |     |     |       |     |      |     |      |      | 97    | 111          |
| S8     | 13   | 12       | Chr     |        |       | 4.40  | 20.12 |       | 9.52  |       |       |      |       |      |      |      | 65.95 |     |      |     |     |       |     |      |     |      |      | 100   | 107          |
| S8     | 13   | 13       | Spl     |        | 0.44  | 27.47 | 32.28 |       | 12.52 |       |       |      |       |      |      | 0.46 | 26.83 |     |      |     |     |       |     |      |     |      |      | 100   | 108          |
| S8     | 13   | 14       | Grt     | 39.53  |       | 21.02 | 29.89 | 1.72  | 3.05  | 4.78  |       |      |       |      |      |      |       |     |      |     |     |       |     |      |     |      |      | 100   | 116          |
| S8     | 13   | 15       | Chr     |        |       | 16.72 | 16.06 |       | 13.68 |       |       |      |       |      |      |      | 53.55 |     |      |     |     |       |     |      |     |      |      | 100   | 112          |
| S8     | 13   | 16       | Ap      |        |       |       | 0.27  |       |       | 49.28 | 1.16  |      | 39.69 | 2.10 | 7.51 |      |       |     |      |     |     |       |     |      |     |      |      | 100   | 115          |
| S8     | 13   | 17       | Qz      | 99.28  |       | 0.38  | 0.35  |       |       |       |       |      |       |      |      |      |       |     |      |     |     |       |     |      |     |      |      | 100   | 106          |
| S8     | 13   | 18       | Ep      | 39.80  |       | 20.70 | 13.88 |       |       | 22.62 |       |      |       |      |      |      |       |     |      |     |     |       |     |      |     |      |      | 97    | 111          |
| S8     | 13   | 19       | Spl     |        | 0.50  | 25.78 | 24.42 |       | 9.71  |       |       |      |       |      |      |      | 39.59 |     |      |     |     |       |     |      |     |      |      | 100   | 107          |
| S8     | 13   | 20       | Spl     |        |       | 43.05 | 15.67 |       | 17.26 |       |       |      |       |      |      |      | 24.02 |     |      |     |     |       |     |      |     |      |      | 100   | 109          |
| S8     | 13   | 21       | "Mag" + | 3.49   |       |       | 94.63 |       |       | 0.40  |       |      | 1.48  |      |      |      |       |     |      |     |     |       |     |      |     |      |      | 100   | 78           |
| S8     | 13   | 22       | Chr     |        |       | 20.80 | 27.29 |       | 9.32  |       |       |      |       |      |      |      | 42.59 |     |      |     |     |       |     |      |     |      |      | 100   | 109          |
| S8     | 13.2 | 1        | Qz      | 99.55  |       |       | 0.45  |       |       |       |       |      |       |      |      |      |       |     |      |     |     |       |     |      |     |      |      | 100   | 120          |
| S8     | 13.2 | 2        | Feohy + | 1.99   |       | 4.35  | 87.67 |       |       | 0.53  |       |      | 5.47  |      |      |      |       |     |      |     |     |       |     |      |     |      |      | 100   | 80           |
| S8     | 13.2 | 3        | Qz      | 98.85  |       |       | 0.87  |       |       | 0.29  |       |      |       |      |      |      |       |     |      |     |     |       |     |      |     |      |      | 100   | 119          |
| S8     | 13.3 | 1        | Ms      | 46.74  | 0.37  | 33.40 | 1.32  |       | 0.65  |       | 1.28  | 8.67 |       |      | 2.57 |      |       |     |      |     |     |       |     |      |     |      |      | 95    | 110          |
| S8     | 13.3 | 2        | Chl     | 24.62  |       | 21.79 | 29.43 |       | 9.16  |       |       |      |       |      |      |      |       |     |      |     |     |       |     |      |     |      |      | 85    | 97           |
| S8     | 13.3 | 3        | Ms      | 48.57  |       | 33.76 | 1.48  |       | 0.75  |       | 0.96  | 9.47 |       |      |      |      |       |     |      |     |     |       |     |      |     |      |      | 95    | 108          |
| S8     | 14   | 1        | Ilm     |        | 49.93 |       | 48.46 | 1.60  |       |       |       |      |       |      |      |      |       |     |      |     |     |       |     |      |     |      |      | 100   | 105          |
| S8     | 14   | 2        | Qz      | 100.00 |       |       |       |       |       |       |       |      |       |      |      |      |       |     |      |     |     |       |     |      |     |      |      | 100   | 120          |
| S8     | 14   | 3        | Ap      |        |       |       |       |       |       | 49.59 |       |      | 45.07 |      | 5.34 |      |       |     |      |     |     |       |     |      |     |      |      | 100   | 116          |
| S8     | 14   | 4        | St      | 28.89  | 0.65  | 53.41 | 12.90 |       | 2.16  |       |       |      |       |      |      |      |       |     |      |     |     |       |     |      |     |      |      | 98    | 109          |
| S8     | 14   | 5        | Grt     | 38.40  |       | 20.48 | 17.38 | 22.98 | 0.75  |       |       |      |       |      |      |      |       |     |      |     |     |       |     |      |     |      |      | 100   | 115          |
| S8     | 14   | 6        | Ep      | 40.34  | 0.57  | 20.40 | 1.66  |       |       | 34.03 |       |      |       |      |      |      |       |     |      |     |     |       |     |      |     |      |      | 97    | 115          |
| S8     | 14   | 7        | Chr     |        | 0.51  | 18.96 | 38.06 |       | 6.83  |       |       |      |       |      |      | 0.45 | 35.20 |     |      |     |     |       |     |      |     |      |      | 100   | 103          |
| S8     | 14   | 8        | Grt     | 39.26  |       | 20.67 | 28.77 | 3.35  | 1.69  | 6.27  |       |      |       |      |      |      |       |     |      |     |     |       |     |      |     |      |      | 100   | 118          |
| S8     | 14   | 9        | Qz      | 99.76  |       |       | 0.24  |       |       |       |       |      |       |      |      |      |       |     |      |     |     |       |     |      |     |      |      | 100   | 117          |
| S8     | 14   | 10       | Feohy + | 7.02   |       | 4.10  | 81.58 | 0.44  |       | 0.55  | 0.68  | 0.52 | 0.86  |      |      |      |       |     |      |     |     |       |     |      |     |      | 4.26 | 100   | 91           |
| S8     | 14   | 11       | Chr     |        |       | 19.64 | 25.05 |       | 10.12 |       |       |      |       |      |      |      | 45.19 |     |      |     |     |       |     |      |     |      |      | 100   | 104          |
| S8     | 14   | 12       | "Mag" + | 4.55   |       | 0.78  | 92.39 | 1.17  |       | 0.39  |       |      |       |      |      |      |       |     | 0.73 |     |     |       |     |      |     |      |      | 100   | 80           |
| S8     | 14.2 | 1        | Ilm     |        | 52.80 |       | 33.61 | 13.59 |       |       |       |      |       |      |      |      |       |     |      |     |     |       |     |      |     |      |      | 100   | 107          |
| S8     | 14.2 | 2        | Ab      | 68.13  | 1.39  | 18.66 | 0.30  |       |       |       | 11.51 |      |       |      |      |      |       |     |      |     |     |       |     |      |     |      |      | 100   | 120          |

Table B3.1: EDS analyses for sample S8.

| Sample | Site | Position | Mineral      | SiO2  | TiO2  | Al2O3 | FeO   | MnO  | MgO   | CaO   | Na2O  | K2O   | P2O5  | SO3  | F    | V2O5 | Cr2O3 | CoO | NiO | CuO | ZnO | As2O3 | SrO | ZrO2  | BaO | HfO2 | WO3   | Total | Actual Total |
|--------|------|----------|--------------|-------|-------|-------|-------|------|-------|-------|-------|-------|-------|------|------|------|-------|-----|-----|-----|-----|-------|-----|-------|-----|------|-------|-------|--------------|
| S8     | 14.2 | 3        | TiO2         |       | 97.62 |       | 2.38  |      |       |       |       |       |       |      |      |      |       |     |     |     |     |       |     |       |     |      |       | 100   | 106          |
| S8     | 14.2 | 4        | TiO2         | 4.91  | 90.68 | 2.21  | 2.21  |      |       |       |       |       |       |      |      |      |       |     |     |     |     |       |     |       |     |      |       | 100   | 105          |
| S8     | 14.3 | 1        | Zrn          | 30.97 |       |       | 0.39  |      |       |       |       |       |       |      |      |      |       |     |     |     |     |       |     | 68.64 |     |      |       | 100   | 119          |
| S8     | 14.3 | 2        | Qz           | 95.50 |       | 2.84  | 0.35  |      |       |       | 0.79  | 0.53  |       |      |      |      |       |     |     |     |     |       |     |       |     |      |       | 100   | 120          |
| S8     | 14.3 | 3        | Chl          | 26.30 |       | 20.70 | 28.58 |      | 9.43  |       |       |       |       |      |      |      |       |     |     |     |     |       |     |       |     |      |       | 85    | 97           |
| S8     | 14.3 | 4        | TiO2 +       | 14.34 | 74.33 | 5.55  | 4.00  |      | 1.05  |       |       | 0.73  |       |      |      |      |       |     |     |     |     |       |     |       |     |      |       | 100   | 108          |
| S8     | 14.3 | 5        | Ms           | 49.09 |       | 32.26 | 1.27  |      | 1.20  |       | 0.57  | 8.87  |       |      | 1.74 |      |       |     |     |     |     |       |     |       |     |      |       | 95    | 110          |
| S8     | 15   | 1        | Grt          | 39.55 |       | 21.41 | 32.93 | 0.40 | 4.06  | 1.65  |       |       |       |      |      |      |       |     |     |     |     |       |     |       |     |      |       | 100   | 113          |
| S8     | 15   | 2        | "Mag" +      | 1.58  |       |       | 98.42 |      |       |       |       |       |       |      |      |      |       |     |     |     |     |       |     |       |     |      |       | 100   | 77           |
| S8     | 15   | 3        | Grt          | 39.33 |       | 20.74 | 29.74 | 3.28 | 1.80  | 5.12  |       |       |       |      |      |      |       |     |     |     |     |       |     |       |     |      |       | 100   | 111          |
| S8     | 15   | 4        | Zrn          | 31.00 |       |       |       |      |       |       |       |       |       |      |      |      |       |     |     |     |     |       |     | 67.60 |     | 1.40 |       | 100   | 122          |
| S8     | 15   | 5        | "Ilm"        |       | 57.18 |       | 40.47 | 2.34 |       |       |       |       |       |      |      |      |       |     |     |     |     |       |     |       |     |      |       | 100   | 109          |
| S8     | 15   | 6        | Chl          | 25.71 |       | 19.80 | 29.29 |      | 10.21 |       |       |       |       |      |      |      |       |     |     |     |     |       |     |       |     |      |       | 85    | 102          |
| S8     | 15   | 7        | Grt?         | 41.09 |       | 21.52 | 20.28 | 0.58 | 8.45  | 8.08  |       |       |       |      |      |      |       |     |     |     |     |       |     |       |     |      |       | 100   | 116          |
| S8     | 15   | 8        | Ep           | 44.63 |       | 21.07 | 6.11  |      | 4.92  | 20.27 |       |       |       |      |      |      |       |     |     |     |     |       |     |       |     |      |       | 97    | 113          |
| S8     | 15   | 9        | Grt          | 40.14 |       | 21.28 | 29.42 | 0.47 | 5.24  | 3.46  |       |       |       |      |      |      |       |     |     |     |     |       |     |       |     |      |       | 100   | 115          |
| S8     | 15   | 10       | Ap           |       |       |       |       |      |       | 47.36 | 1.10  |       | 38.12 | 1.96 | 9.06 |      |       |     |     |     |     |       |     |       |     |      | 2.40  | 100   | 114          |
| S8     | 15   | 11       | Chl?         | 30.41 | 0.91  | 20.13 | 42.06 |      | 1.20  | 0.65  |       | 1.28  | 1.01  |      |      |      |       |     |     |     |     |       |     |       |     |      | 2.35  | 100   | 91           |
| S8     | 15   | 12       | Grt          | 40.32 |       | 21.50 | 23.62 | 0.95 | 3.11  | 10.51 |       |       |       |      |      |      |       |     |     |     |     |       |     |       |     |      |       | 100   | 112          |
| S8     | 15   | 13       | "Mag" +      | 4.79  |       |       | 93.81 | 0.54 |       |       |       |       | 0.86  |      |      |      |       |     |     |     |     |       |     |       |     |      |       | 100   | 82           |
| S8     | 15   | 14       | Ms           | 49.12 | 0.43  | 24.17 | 7.95  |      | 2.32  |       | 0.28  | 10.74 |       |      |      |      |       |     |     |     |     |       |     |       |     |      |       | 95    | 105          |
| S8     | 15   | 15       | Ep           | 40.42 |       | 20.25 | 2.59  |      |       | 33.74 |       |       |       |      |      |      |       |     |     |     |     |       |     |       |     |      |       | 97    | 111          |
| S8     | 15   | 16       | Ilm          |       | 53.80 |       | 44.83 | 1.37 |       |       |       |       |       |      |      |      |       |     |     |     |     |       |     |       |     |      |       | 100   | 107          |
| S8     | 15   | 17       | Mag +        | 3.33  |       | 1.83  | 90.16 | 1.08 |       | 0.51  |       |       | 1.04  |      |      |      |       |     |     |     |     |       |     |       |     |      | 2.06  | 100   | 91           |
| S8     | 15.2 | 1        | Qz +         | 88.74 |       | 4.21  | 5.20  |      | 0.55  |       | 0.43  | 0.88  |       |      |      |      |       |     |     |     |     |       |     |       |     |      |       | 100   | 93           |
| S8     | 15.2 | 2        | Qz           | 99.28 |       |       | 0.72  |      |       |       |       |       |       |      |      |      |       |     |     |     |     |       |     |       |     |      |       | 100   | 199          |
| S8     | 15.2 | 3        | "Mag" +      | 3.34  |       | 2.08  | 92.54 |      |       | 0.37  |       |       | 1.23  |      |      |      | 0.44  |     |     |     |     |       |     |       |     |      |       | 100   | 84           |
| S8     | 15.2 | 4        | Feohy +      | 8.95  |       | 6.34  | 82.80 |      |       | 0.33  |       |       | 1.58  |      |      |      |       |     |     |     |     |       |     |       |     |      |       | 100   | 81           |
| S8     | 15.3 | 1        | Chl          | 26.89 |       | 19.93 | 21.63 |      | 16.23 |       | 0.32  |       |       |      |      |      |       |     |     |     |     |       |     |       |     |      |       | 85    | 93           |
| S8     | 15.3 | 2        | Qz           | 99.32 |       |       | 0.68  |      |       |       |       |       |       |      |      |      |       |     |     |     |     |       |     |       |     |      |       | 100   | 120          |
| S8     | 15.3 | 3        | Feohy +      | 3.47  |       | 1.63  | 86.53 |      |       |       |       |       |       |      |      |      |       |     |     |     |     |       |     |       |     |      | 8.37  | 100   | 77           |
| S8     | 15.3 | 4        | Ab           | 68.15 |       | 18.57 | 1.78  |      |       |       | 11.50 |       |       |      |      |      |       |     |     |     |     |       |     |       |     |      |       | 100   | 122          |
| S8     | 15.4 | 1        | Qz           | 99.67 |       |       | 0.33  |      |       |       |       |       |       |      |      |      |       |     |     |     |     |       |     |       |     |      |       | 100   | 121          |
| S8     | 15.4 | 2        | TiO2         |       | 99.45 |       | 0.55  |      |       |       |       |       |       |      |      |      |       |     |     |     |     |       |     |       |     |      |       | 100   | 108          |
| S8     | 15.4 | 3        | Feohy +      | 8.00  | 0.60  | 6.52  | 71.45 |      | 0.95  | 1.26  | 0.88  |       |       |      |      |      |       |     |     |     |     |       |     |       |     |      | 10.34 | 100   | 75           |
| S8     | 15.4 | 4        | Ab + Feohy + | 57.37 |       | 17.46 | 10.88 |      | 5.39  | 0.58  | 8.05  | 0.26  |       |      |      |      |       |     |     |     |     |       |     |       |     |      |       | 100   | 96           |
| S8     | 15.5 | 1        | Ep           | 39.91 |       | 22.76 | 11.82 | 0.30 |       | 22.22 |       |       |       |      |      |      |       |     |     |     |     |       |     |       |     |      |       | 97    | 110          |
| S8     | 15.5 | 2        | Chl          | 36.16 |       | 20.32 | 22.36 | 0.55 | 19.84 | 0.53  |       | 0.23  |       |      |      |      |       |     |     |     |     |       |     |       |     |      |       | 100   | 94           |
| S8     | 15.5 | 3        | Qz           | 99.13 |       | 0.32  | 0.29  |      |       |       | 0.27  |       |       |      |      |      |       |     |     |     |     |       |     |       |     |      |       | 100   | 121          |
| S8     | 16   | 1        | Ilm          |       | 50.29 |       | 48.14 | 1.57 |       |       |       |       |       |      |      |      |       |     |     |     |     |       |     |       |     |      |       | 100   | 106          |
| S8     | 16   | 2        | TiO2         |       | 98.57 |       |       |      |       | 0.37  |       |       |       |      |      |      | 1.06  |     |     |     |     |       |     |       |     |      |       | 100   | 110          |
| S8     | 16   | 3        | "Mag" +      | 2.94  |       | 0.70  | 96.37 |      |       |       |       |       |       |      |      |      |       |     |     |     |     |       |     |       |     |      |       | 100   | 82           |
| S8     | 16   | 4        | Grt?         | 41.08 |       | 22.11 | 23.90 | 0.62 | 11.43 | 0.87  |       |       |       |      |      |      |       |     |     |     |     |       |     |       |     |      |       | 100   | 116          |



Table B3.1: EDS analyses for sample S8.

| Sample | Site | Position | Mineral      | SiO2   | TiO2  | Al2O3 | FeO   | MnO   | MgO   | CaO   | Na2O | K2O   | P2O5 | SO3   | F     | V2O5 | Cr2O3 | CoO   | NiO | CuO  | ZnO | As2O3 | SrO  | ZrO2 | BaO   | HfO2 | WO3  | Total | Actual Total |     |
|--------|------|----------|--------------|--------|-------|-------|-------|-------|-------|-------|------|-------|------|-------|-------|------|-------|-------|-----|------|-----|-------|------|------|-------|------|------|-------|--------------|-----|
| S8     | 16   | 5        | "Mag" +      | 3.40   |       |       | 92.62 | 2.02  |       | 0.37  |      |       | 0.92 |       |       |      |       |       |     | 0.67 |     |       |      |      |       |      |      | 100   | 79           |     |
| S8     | 16   | 6        | TiO2         | 0.77   | 98.98 |       |       |       |       | 0.26  |      |       |      |       |       |      |       |       |     |      |     |       |      |      |       |      |      | 100   | 106          |     |
| S8     | 16   | 7        | TiO2         |        | 99.61 |       | 0.39  |       |       |       |      |       |      |       |       |      |       |       |     |      |     |       |      |      |       |      |      | 100   | 105          |     |
| S8     | 16   | 8        | Fl           |        |       |       | 0.29  |       |       | 58.95 |      |       |      |       | 40.76 |      |       |       |     |      |     |       |      |      |       |      |      | 100   | 96           |     |
| S8     | 16   | 9        | Grt          | 39.53  |       | 20.79 | 14.20 | 15.56 |       | 9.91  |      |       |      |       |       |      |       |       |     |      |     |       |      |      |       |      |      | 100   | 111          |     |
| S8     | 16   | 10       | Ep           | 40.22  |       | 20.66 | 3.01  |       |       | 33.12 |      |       |      |       |       |      |       |       |     |      |     |       |      |      |       |      |      | 97    | 112          |     |
| S8     | 16   | 11       | Qz           | 98.23  |       |       |       |       |       | 0.19  | 0.42 |       |      |       |       |      |       |       |     |      |     |       |      |      |       |      | 1.16 | 100   | 116          |     |
| S8     | 16   | 12       | Ilm          |        | 53.83 |       | 44.53 | 1.64  |       |       |      |       |      |       |       |      |       |       |     |      |     |       |      |      |       |      |      | 100   | 105          |     |
| S8     | 16   | 13       | Ilm          |        | 52.26 |       | 45.03 | 2.71  |       |       |      |       |      |       |       |      |       |       |     |      |     |       |      |      |       |      |      | 100   | 107          |     |
| S8     | 16   | 14       | Chr          |        |       | 18.84 | 18.62 |       | 11.88 |       |      |       |      |       |       |      | 50.67 |       |     |      |     |       |      |      |       |      |      |       | 100          | 107 |
| S8     | 16   | 15       | Ilm          |        | 50.81 |       | 47.76 | 1.43  |       |       |      |       |      |       |       |      |       |       |     |      |     |       |      |      |       |      |      | 100   | 108          |     |
| S8     | 16   | 16       | ?Chl + Feohy | 28.45  | 0.37  | 13.20 | 55.35 |       |       | 0.36  |      | 0.34  | 1.93 |       |       |      |       |       |     |      |     |       |      |      |       |      |      |       | 100          | 89  |
| S8     | 16   | 17       | Qz           | 100.00 |       |       |       |       |       |       |      |       |      |       |       |      |       |       |     |      |     |       |      |      |       |      |      | 100   | 121          |     |
| S8     | 16   | 18       | Kfs          | 66.05  |       | 18.10 |       |       |       |       | 1.68 | 13.33 |      |       |       |      |       |       |     |      |     |       |      |      | 0.84  |      |      | 100   | 117          |     |
| S8     | 16   | 19       | "Mag" +      | 3.18   |       | 1.15  | 93.52 |       |       | 0.46  |      |       | 1.68 |       |       |      |       |       |     |      |     |       |      |      |       |      |      | 100   | 83           |     |
| S8     | 16   | 20       | Chr          | 0.81   |       | 10.74 | 23.92 |       | 9.92  |       |      |       |      |       |       |      | 54.62 |       |     |      |     |       |      |      |       |      |      | 100   | 100          |     |
| S8     | 16   | 21       | Feohy +      | 5.50   |       | 2.85  | 87.26 |       |       | 0.71  |      |       | 2.84 |       |       |      |       |       |     | 0.84 |     |       |      |      |       |      |      | 100   | 77           |     |
| S8     | 16   | 22       | Feohy +      | 11.42  | 0.53  | 2.62  | 83.14 |       |       | 0.88  |      |       | 1.40 |       |       |      |       |       |     |      |     |       |      |      |       |      |      | 100   | 88           |     |
| S8     | 16.2 | 1        | "Mag" +      | 2.96   |       | 1.57  | 92.82 | 0.91  |       | 0.34  |      |       | 1.41 |       |       |      |       |       |     |      |     |       |      |      |       |      |      | 100   | 82           |     |
| S8     | 16.2 | 2        | Feohy +      | 5.24   |       | 5.74  | 78.22 |       |       | 0.60  | 0.92 |       | 2.85 |       |       |      |       |       |     |      |     |       |      |      |       |      | 6.43 | 100   | 80           |     |
| S8     | 16.3 | 1        | Chl?         | 31.00  | 0.82  | 22.71 | 42.18 |       | 0.54  | 0.38  | 0.77 | 0.60  | 1.00 |       |       |      |       |       |     |      |     |       |      |      |       |      |      | 100   | 92           |     |
| S8     | 16.3 | 2        | Qz +         | 90.37  |       | 6.60  | 1.94  |       |       |       | 0.30 | 0.79  |      |       |       |      |       |       |     |      |     |       |      |      |       |      |      | 100   | 120          |     |
| S8     | 16.3 | 3        | Chl          | 29.74  | 0.38  | 21.27 | 28.97 |       | 0.98  | 0.38  | 0.40 | 1.97  | 0.91 |       |       |      |       |       |     |      |     |       |      |      |       |      |      | 85    | 92           |     |
| S8     | 17   | 1        | Grt          | 39.69  |       | 21.03 | 27.85 | 6.00  | 3.66  | 1.77  |      |       |      |       |       |      |       |       |     |      |     |       |      |      |       |      |      | 100   | 109          |     |
| S8     | 17   | 2        | Ep           | 40.65  |       | 28.24 | 5.57  |       |       | 22.54 |      |       |      |       |       |      |       |       |     |      |     |       |      |      |       |      |      | 97    | 106          |     |
| S8     | 17   | 3        | Ilm          |        | 53.55 |       | 44.25 | 2.19  |       |       |      |       |      |       |       |      |       |       |     |      |     |       |      |      |       |      |      | 100   | 105          |     |
| S8     | 17   | 4        | "Mag" +      | 2.74   |       | 0.74  | 94.72 |       |       | 0.52  |      |       | 1.28 |       |       |      |       |       |     |      |     |       |      |      |       |      |      | 100   | 80           |     |
| S8     | 17   | 5        | Qz           | 100.00 |       |       |       |       |       |       |      |       |      |       |       |      |       |       |     |      |     |       |      |      |       |      |      | 100   | 121          |     |
| S8     | 17   | 6        | "Mag" +      | 3.39   |       |       | 96.61 |       |       |       |      |       |      |       |       |      |       |       |     |      |     |       |      |      |       |      |      | 100   | 77           |     |
| S8     | 17   | 7        | Grt          | 40.22  |       | 21.09 | 28.01 | 1.15  | 4.38  | 5.16  |      |       |      |       |       |      |       |       |     |      |     |       |      |      |       |      |      | 100   | 116          |     |
| S8     | 17   | 8        | Ilm          |        | 51.12 |       | 48.88 |       |       |       |      |       |      |       |       |      |       |       |     |      |     |       |      |      |       |      |      | 100   | 107          |     |
| S8     | 17   | 9        | Chr          |        |       | 27.85 | 17.84 |       | 13.84 |       |      |       |      |       |       |      | 40.47 |       |     |      |     |       |      |      |       |      |      | 100   | 112          |     |
| S8     | 17   | 10       | "Mag" +      | 3.88   |       | 0.88  | 93.03 |       |       | 0.59  |      |       |      |       |       |      | 1.63  |       |     |      |     |       |      |      |       |      |      | 100   | 82           |     |
| S8     | 17   | 11       | Pg           | 48.31  |       | 38.23 | 0.45  |       |       |       | 7.30 | 0.72  |      |       |       |      |       |       |     |      |     |       |      |      |       |      |      | 95    | 108          |     |
| S8     | 17   | 12       | Feohy +      | 3.92   |       | 1.27  | 88.90 |       |       | 0.73  |      |       | 0.86 |       |       |      |       |       |     |      |     |       |      |      |       |      | 4.32 | 100   | 85           |     |
| S8     | 17   | 13       | Ep           | 40.59  |       | 25.59 | 8.48  | 0.32  |       | 22.02 |      |       |      |       |       |      |       |       |     |      |     |       |      |      |       |      |      | 97    | 110          |     |
| S8     | 17   | 14       | Brt          |        |       |       |       |       |       |       |      |       |      | 36.60 |       |      |       | -0.04 |     |      |     |       | 1.31 |      | 62.13 |      |      | 100   | 111          |     |
| S8     | 17   | 15       | Grt          | 39.30  |       | 21.20 | 31.85 | 2.30  | 3.91  | 1.43  |      |       |      |       |       |      |       |       |     |      |     |       |      |      |       |      |      | 100   | 112          |     |
| S8     | 17   | 16       | Fl?          |        |       |       |       |       | 0.56  | 71.13 |      |       |      |       | 28.31 |      |       |       |     |      |     |       |      |      |       |      |      | 100   | 81           |     |
| S8     | 17   | 17       | Dol          |        |       |       |       |       | 22.94 | 31.06 |      |       |      |       |       |      |       |       |     |      |     |       |      |      |       |      |      | 54    | 56           |     |
| S8     | 17.2 | 1        | TiO2 +       | 2.69   | 76.88 | 3.93  | 12.15 |       |       | 0.88  | 0.75 |       | 2.72 |       |       |      |       |       |     |      |     |       |      |      |       |      |      | 100   | 95           |     |
| S8     | 17.2 | 2        | Qz +         | 94.43  | 0.50  | 3.04  | 0.85  |       | 0.41  |       | 0.31 | 0.47  |      |       |       |      |       |       |     |      |     |       |      |      |       |      |      | 100   | 113          |     |
| S8     | 17.2 | 3        | Sd           |        |       |       | 54.35 | 0.43  |       | 1.22  |      |       |      |       |       |      |       |       |     |      |     |       |      |      |       |      |      | 56    | 58           |     |

Table B3.1: EDS analyses for sample S8.

| Sample | Site                                    | Position | Mineral | SiO2   | TiO2  | Al2O3 | FeO   | MnO  | MgO   | CaO   | Na2O | K2O   | P2O5  | SO3  | F    | V2O5 | Cr2O3 | CoO | NiO | CuO | ZnO  | As2O3 | SiO   | ZrO2 | BaO  | HfO2 | WO3  | Total | Actual Total |     |
|--------|-----------------------------------------|----------|---------|--------|-------|-------|-------|------|-------|-------|------|-------|-------|------|------|------|-------|-----|-----|-----|------|-------|-------|------|------|------|------|-------|--------------|-----|
| S8     | 17.2                                    | 4        | Kln     | 44.57  |       | 6.43  | 30.98 |      | 0.39  | 1.65  |      | 0.35  |       |      |      |      |       |     |     |     |      |       |       |      |      |      | 1.63 | 86    | 95           |     |
| S8     | 17.2                                    | 5        | Feohy + | 5.70   |       | 4.59  | 85.03 |      |       | 0.40  |      |       | 4.28  |      |      |      |       |     |     |     |      |       |       |      |      |      |      | 100   | 79           |     |
| S8     | 17.2                                    | 6        | Qz      | 99.38  |       |       | 0.62  |      |       |       |      |       |       |      |      |      |       |     |     |     |      |       |       |      |      |      |      | 100   | 120          |     |
| S8     | 18                                      | 1        | "Mag" + | 5.14   |       | 1.02  | 93.43 |      |       | 0.40  |      |       |       |      |      |      |       |     |     |     |      |       |       |      |      |      |      | 100   | 79           |     |
| S8     | 18                                      | 2        | "Mag" + | 4.77   |       | 1.38  | 92.57 | 0.79 |       | 0.49  |      |       |       |      |      |      |       |     |     |     |      |       |       |      |      |      |      | 100   | 77           |     |
| S8     | 18                                      | 3        | Qz      | 100.00 |       |       |       |      |       |       |      |       |       |      |      |      |       |     |     |     |      |       |       |      |      |      |      | 100   | 116          |     |
| S8     | 18                                      | 4        | Feohy + | 7.51   |       | 2.98  | 86.57 |      |       | 0.46  |      |       | 2.47  |      |      |      |       |     |     |     |      |       |       |      |      |      |      | 100   | 78           |     |
| S8     | 18                                      | 5        | Chr     |        | 0.39  | 19.00 | 34.26 | 1.68 | 0.62  |       |      |       |       |      |      |      | 41.28 |     |     |     | 2.76 |       |       |      |      |      |      | 100   | 101          |     |
| S8     | 18                                      | 6        | Ilm     |        | 50.18 |       | 47.99 | 1.83 |       |       |      |       |       |      |      |      |       |     |     |     |      |       |       |      |      |      |      | 100   | 101          |     |
| S8     | 18                                      | 7        | Ms      | 48.44  | 0.67  | 27.70 | 6.03  |      | 1.56  |       |      | 10.60 |       |      |      |      |       |     |     |     |      |       |       |      |      |      |      | 95    | 105          |     |
| S8     | 18                                      | 8        | Ep      | 39.59  |       | 24.08 | 11.57 |      |       | 21.77 |      |       |       |      |      |      |       |     |     |     |      |       |       |      |      |      |      | 97    | 105          |     |
| S8     | 18                                      | 9        | Grt     | 39.54  |       | 20.99 | 28.26 | 1.26 | 1.55  | 8.41  |      |       |       |      |      |      |       |     |     |     |      |       |       |      |      |      |      | 100   | 112          |     |
| S8     | 18                                      | 10       | "Mag" + | 3.32   |       | 2.11  | 94.57 |      |       |       |      |       |       |      |      |      |       |     |     |     |      |       |       |      |      |      |      | 100   | 77           |     |
| S8     | 18                                      | 11       | Zrn     | 30.84  |       |       |       |      |       |       |      |       |       |      |      |      |       |     |     |     |      |       | 67.66 |      | 1.50 |      |      | 100   | 124          |     |
| S8     | 18                                      | 12       | Chr     |        |       | 9.79  | 20.41 |      | 10.72 |       |      |       |       |      |      |      | 59.09 |     |     |     |      |       |       |      |      |      |      |       | 100          | 109 |
| S8     | 18                                      | 13       | Ep      | 40.00  | 0.30  | 27.63 | 6.01  | 0.27 |       | 22.79 |      |       |       |      |      |      |       |     |     |     |      |       |       |      |      |      |      |       | 97           | 113 |
| S8     | 18                                      | 14       | Grt     | 39.64  |       | 21.10 | 31.27 | 0.90 | 5.09  | 2.00  |      |       |       |      |      |      |       |     |     |     |      |       |       |      |      |      |      |       | 100          | 117 |
| S8     | 18                                      | 15       | Chr     |        |       | 12.06 | 19.98 |      | 10.90 |       |      |       |       |      |      |      | 57.06 |     |     |     |      |       |       |      |      |      |      |       | 100          | 108 |
| S8     | 18                                      | 16       | Ap      |        |       |       | 0.29  |      |       | 46.08 | 1.57 |       | 38.72 | 2.10 | 8.14 |      |       |     |     |     |      |       |       |      |      |      | 3.10 | 100   | 114          |     |
| S8     | 18                                      | 17       | Ilm     |        | 53.73 |       | 42.95 | 3.32 |       |       |      |       |       |      |      |      |       |     |     |     |      |       |       |      |      |      |      |       | 100          | 105 |
| S8     | 18                                      | 18       | Chl     | 26.90  |       | 19.96 | 22.58 | 0.30 | 15.26 |       |      |       |       |      |      |      |       |     |     |     |      |       |       |      |      |      |      |       | 85           | 97  |
| S8     | 18                                      | 19       | "Mag" + | 3.98   |       |       | 94.47 |      | 1.07  | 0.48  |      |       |       |      |      |      |       |     |     |     |      |       |       |      |      |      |      |       | 100          | 81  |
| S8     | 18                                      | 20       | Ep      | 39.73  | 0.71  | 17.25 | 5.66  | 1.27 | 0.51  | 31.88 |      |       |       |      |      |      |       |     |     |     |      |       |       |      |      |      |      |       | 97           | 110 |
| S8     | 18.2                                    | 1        | Qz      | 99.55  | 0.45  |       |       |      |       |       |      |       |       |      |      |      |       |     |     |     |      |       |       |      |      |      |      |       | 100          | 119 |
| S8     | 18.2                                    | 2        | Ab +    | 66.82  | 7.22  | 13.40 | 2.64  |      |       | 1.35  | 8.58 |       |       |      |      |      |       |     |     |     |      |       |       |      |      |      |      |       | 100          | 124 |
| S8     | 18.2                                    | 3        | "Ilm"   |        | 56.06 |       | 41.17 | 2.77 |       |       |      |       |       |      |      |      |       |     |     |     |      |       |       |      |      |      |      |       | 100          | 105 |
| S8     | 18.2                                    | 4        | TiO2    |        | 99.13 |       | 0.87  |      |       |       |      |       |       |      |      |      |       |     |     |     |      |       |       |      |      |      |      |       | 100          | 108 |
| S8     | 18.2                                    | 5        | Ilm     |        | 54.60 |       | 42.67 | 2.74 |       |       |      |       |       |      |      |      |       |     |     |     |      |       |       |      |      |      |      |       | 100          | 106 |
|        |                                         |          |         |        |       |       |       |      |       |       |      |       |       |      |      |      |       |     |     |     |      |       |       |      |      |      |      |       |              |     |
|        | Notes                                   |          |         |        |       |       |       |      |       |       |      |       |       |      |      |      |       |     |     |     |      |       |       |      |      |      |      |       |              |     |
|        | " " = indicates that mineral is altered |          |         |        |       |       |       |      |       |       |      |       |       |      |      |      |       |     |     |     |      |       |       |      |      |      |      |       |              |     |
|        | + = indicates other minerals present    |          |         |        |       |       |       |      |       |       |      |       |       |      |      |      |       |     |     |     |      |       |       |      |      |      |      |       |              |     |

B4: SEM-BSE images and EDS  
mineral analyses for sample S9.

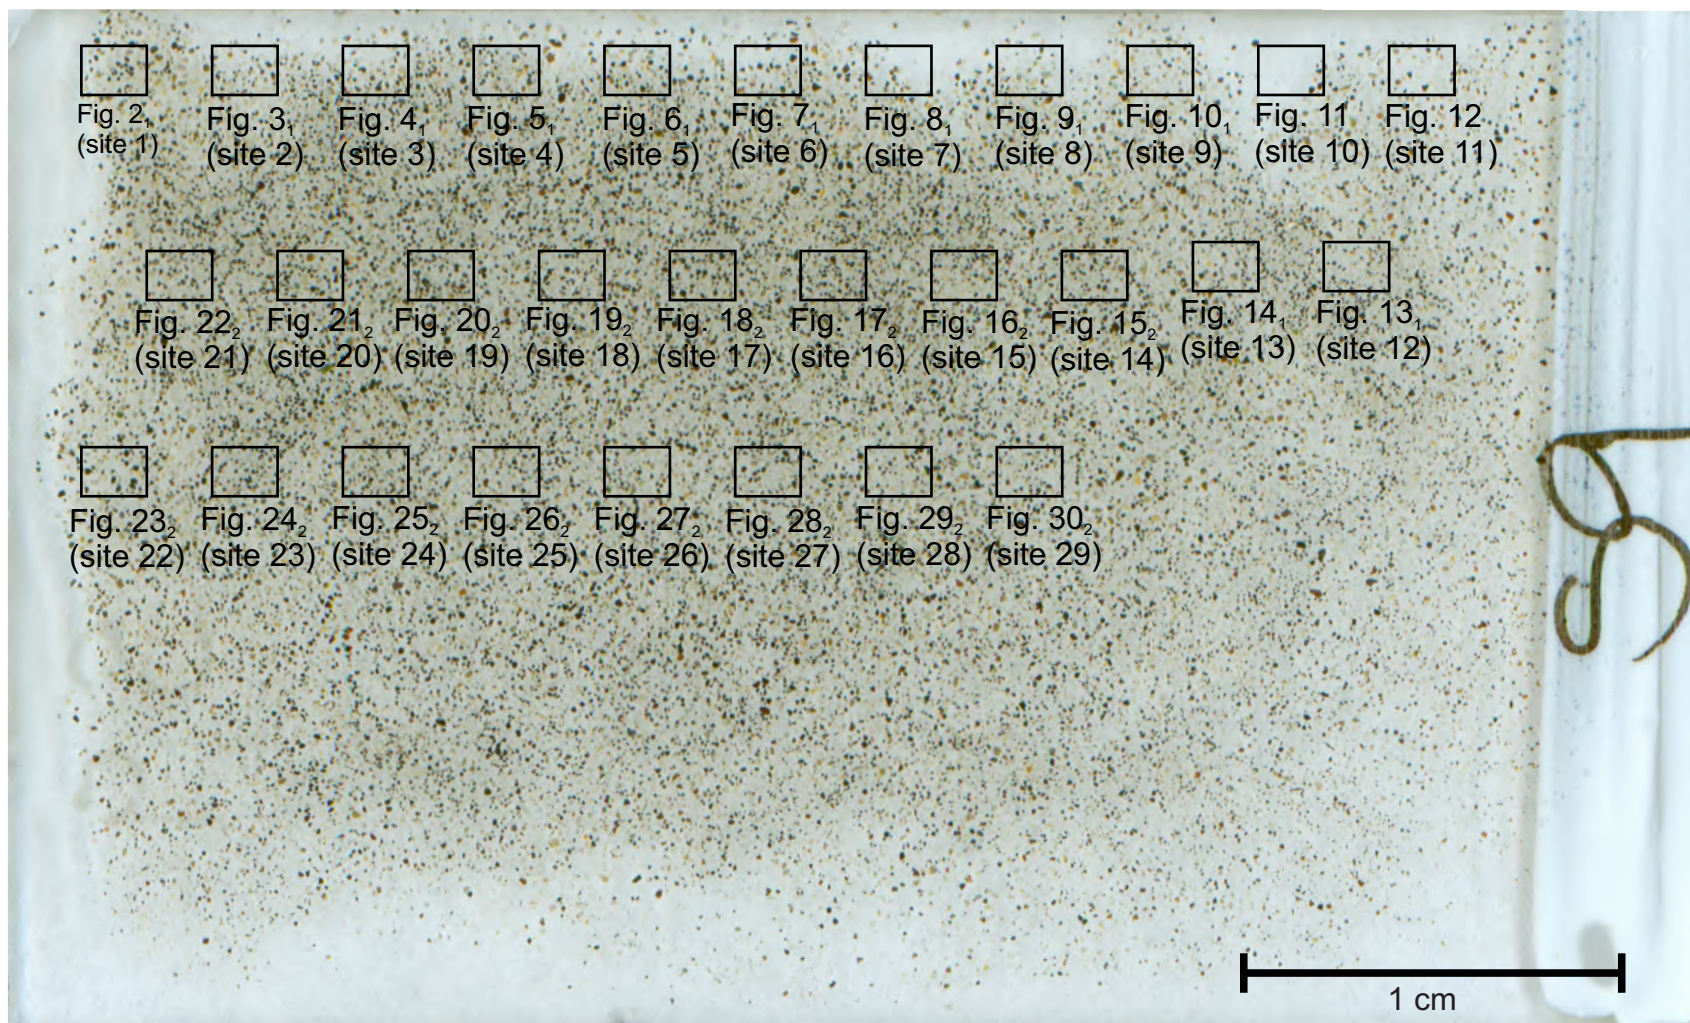

Figure B4.1: Scanned thin section of sample S9 showing the location of analysed sites. This sample is of heavy mineral separates from a bouldery erosive river that consisted of sand patches of medium - coarse grain. The subscripts indicate the tables where the sites can be found 1 = Table 1-3.1, 2 = Table 1-3.2.



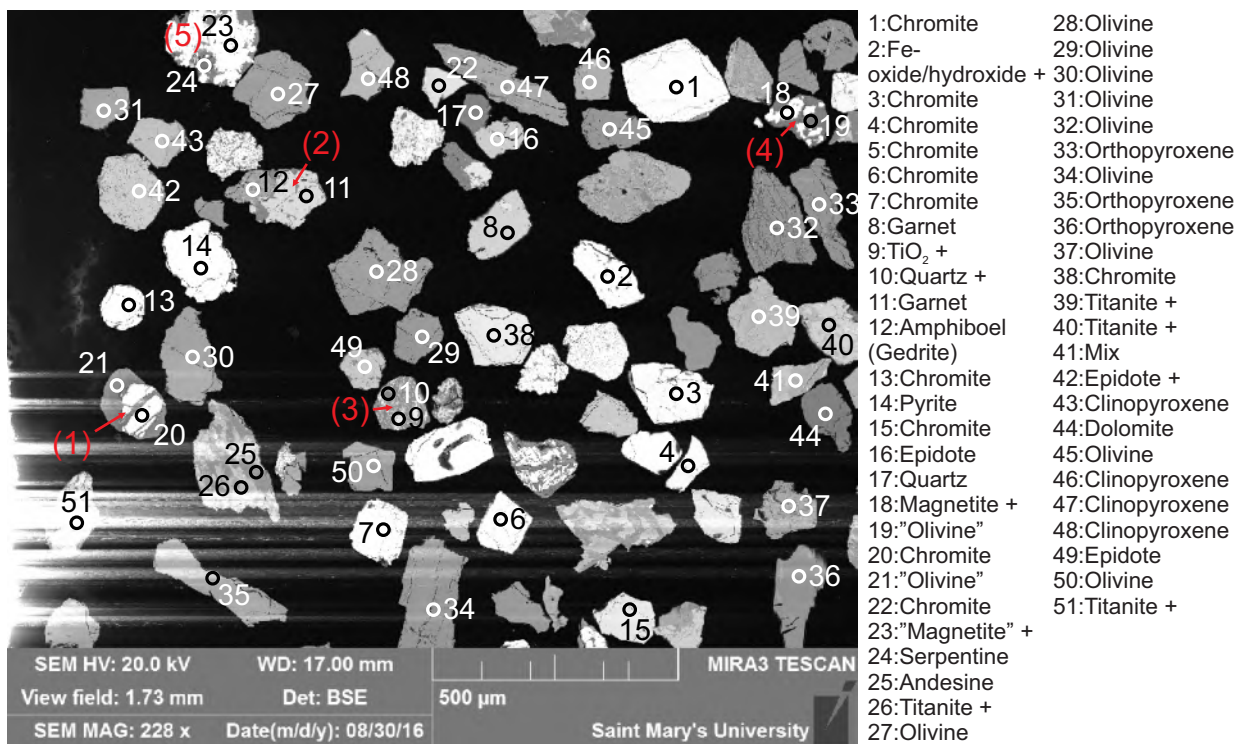

Figure B4.2: Sample S9 site 1 (SEM). 1: Lithic clast (altered olivine + chromite, ophiolite). 2: Lithic clast (garnet + gedrite, metamorphic). 3: Lithic clast (quartz + titania, metamorphic). 4: Lithic clast (olivine + magnetite, ophiolite). 5: Lithic clast (magnetite + serpentine, ophiolite).

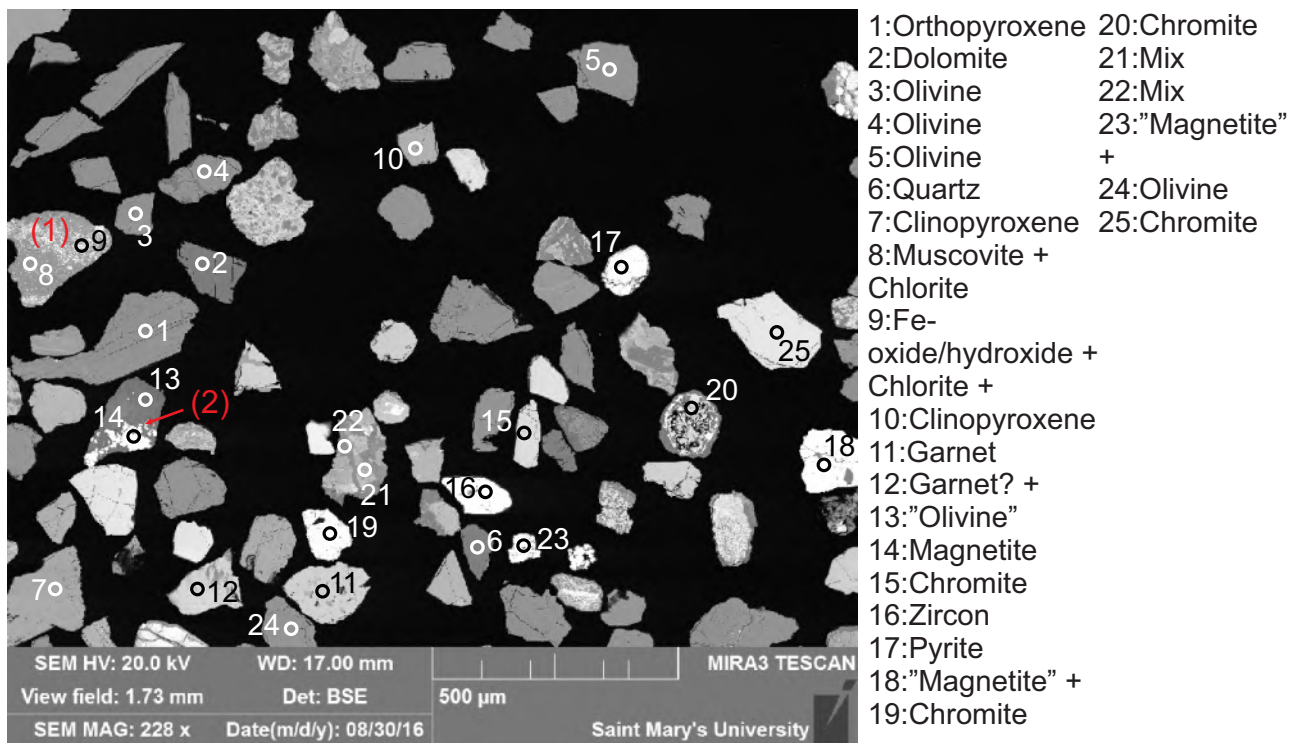

Figure B4.3: Sample S9 site 2 (SEM). 1: Lithic clast (muscovite + chlorite + Fe-oxide/hydroxide, metamorphic). 2: Lithic clast (olivine + magnetite, ophiolite).

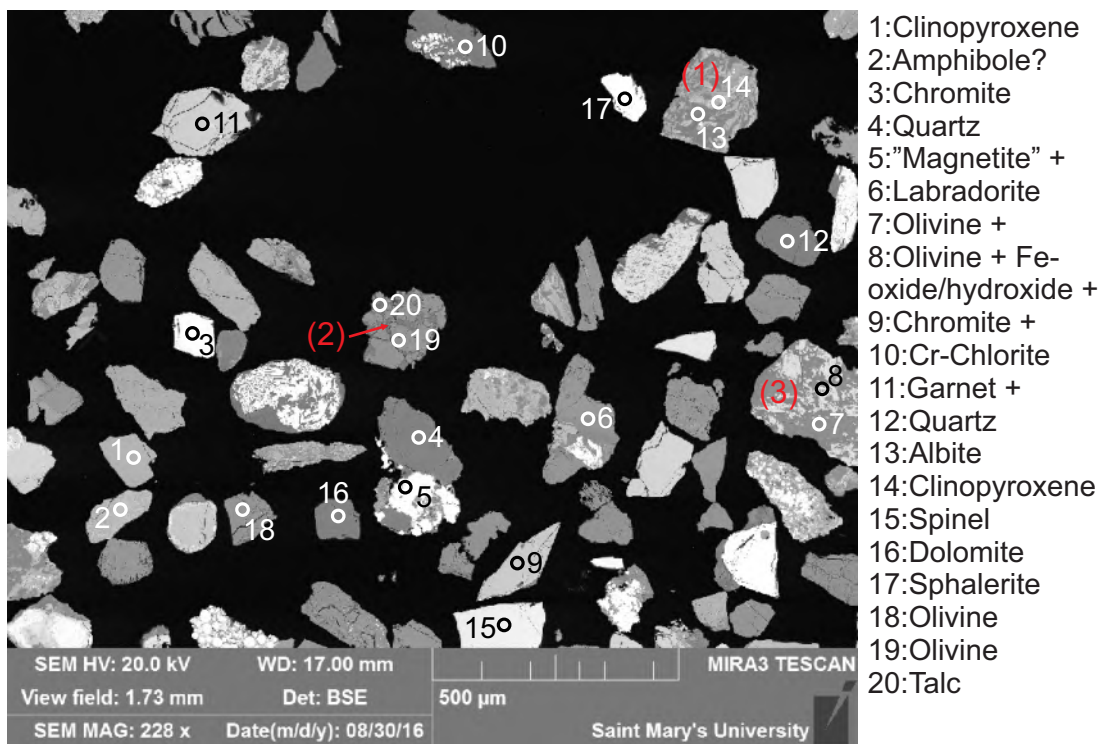

Figure B4.4: Sample S9 site 3 (SEM). 1: Granitic lithic clast (albite + clinopyroxene, metaophiolite). 2: Olivine with talc along fractures. 3: Lithic clast (olivine + Fe-oxide/hydroxide probably magnetite, ophiolite).

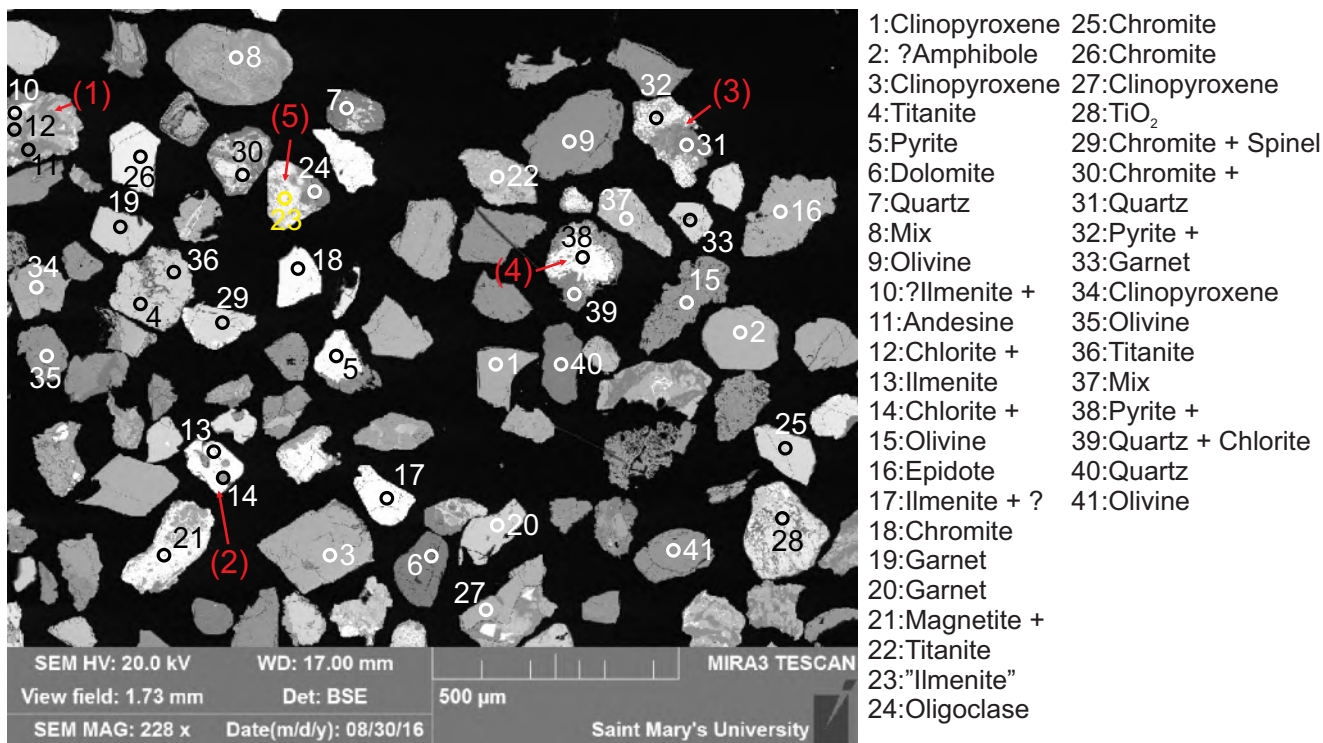

Figure B4.5: Sample S9 site 4 (SEM). 1: Lithic clast (chlorite + andesine + ilmenite, igneous). 2: ilmenite grain with chlorite inclusions. 3: Lithic clast (quartz + pyrite, hydrothermal). 4: Lithic clast (quartz + pyrite, concretion in siltstone). 5: Lithic clast (oligoclase + ilmenite, igneous).



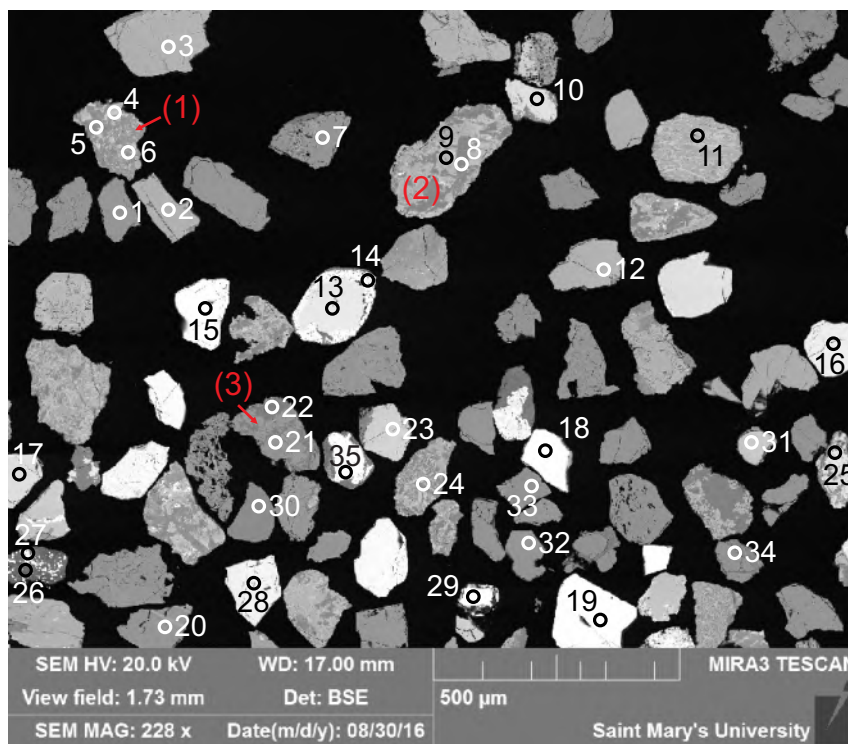

- |                    |                      |
|--------------------|----------------------|
| 1: Olivine         | 25: TiO <sub>2</sub> |
| 2: Orthopyroxene   | 26: Altered Olivine  |
| 3: Clinopyroxene   | 27: ?                |
| 4: Clinopyroxene   | 28: Chromite         |
| 5: Andesine        | 29: Pyrite           |
| 6: ? Clinopyroxene | 30: Tourmaline       |
| 7: Olivine         | 31: Apatite + REE    |
| 8: Albite          | 32: Olivine          |
| 9: Clinopyroxene?  | 33: Olivine          |
| 10: Garnet         | 34: Olivine          |
| 11: Titanite?      | 35: Chromite +       |
| 12: Clinopyroxene  |                      |
| 13: Chromite       |                      |
| 14: Chromite       |                      |
| 15: Chromite       |                      |
| 16: Chromite       |                      |
| 17: Chromite       |                      |
| 18: Chromite       |                      |
| 19: Chromite       |                      |
| 20: Orthopyroxene  |                      |
| 21: Olivine        |                      |
| 22: Talc           |                      |
| 23: Apatite        |                      |
| 24: Albite         |                      |

Figure B4.6: Sample S9 site 5 (SEM). 1: Lithic clast (andesine + clinopyroxene, volcanic). 2: Lithic clast (albite + clinopyroxene, igneous). 3: Olivine grain altering to talc, ophiolite.

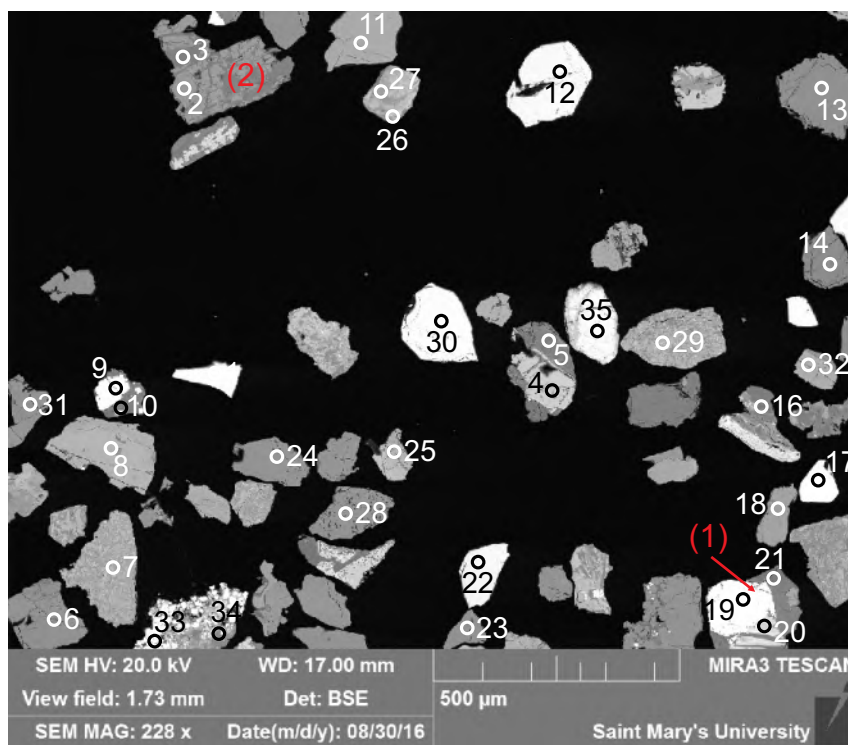

- |                   |                          |
|-------------------|--------------------------|
| 1: Chromite       | 25: Clinopyroxene?       |
| 2: Amphibole      | 26: ? Clinopyroxene +    |
| 3: Albite         | 27: Amphibole            |
| 4: Spinle +       | 28: Olivine              |
| 5: Garnet?        | 29: ? Amphibole          |
| 6: Olivine        | 30: Chromite             |
| 7: Epidote?       | 31: Olivine              |
| 8: Clinopyroxene  | 32: Clinopyroxene?       |
| 9: Magnetite      | 33: Fe-oxide/hydroxide + |
| 10: "Olivine"     | 34: Quartz +             |
| 11: Clinopyroxene | 35: Ilmenite             |
| 12: Chromite      |                          |
| 13: Olivine       |                          |
| 14: Olivine       |                          |
| 15: Chromite      |                          |
| 16: Quartz        |                          |
| 17: Chromite      |                          |
| 18: Chlorite      |                          |
| 19: Pentlandite   |                          |
| 20: Chromite +    |                          |
| 21: "Olivine"     |                          |
| 22: Chromite      |                          |
| 23: Olivine       |                          |
| 24: Olivine       |                          |

Figure B4.7: Sample S9 site 6 (SEM). 1: Lithic clast (chromite + olivine + pentlandite, ophiolite). 2: Lithic clast (amphibole + albite, igneous).

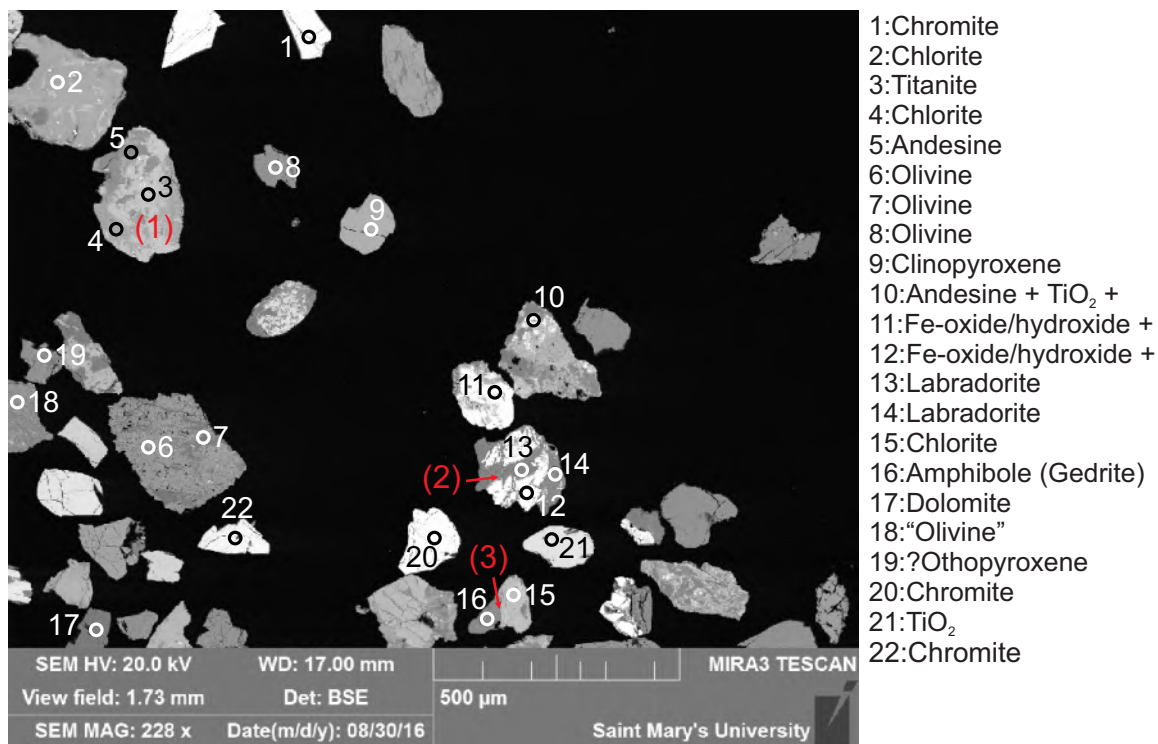

Figure B4.8: Sample S9 site 7 (SEM). 1: Lithic clast (titanite + chlorite + plagioclase, metamorphic). 2: Lithic clast (labradorite, igneous). 3: Lithic clast (chlorite + gedrite, metamorphic).

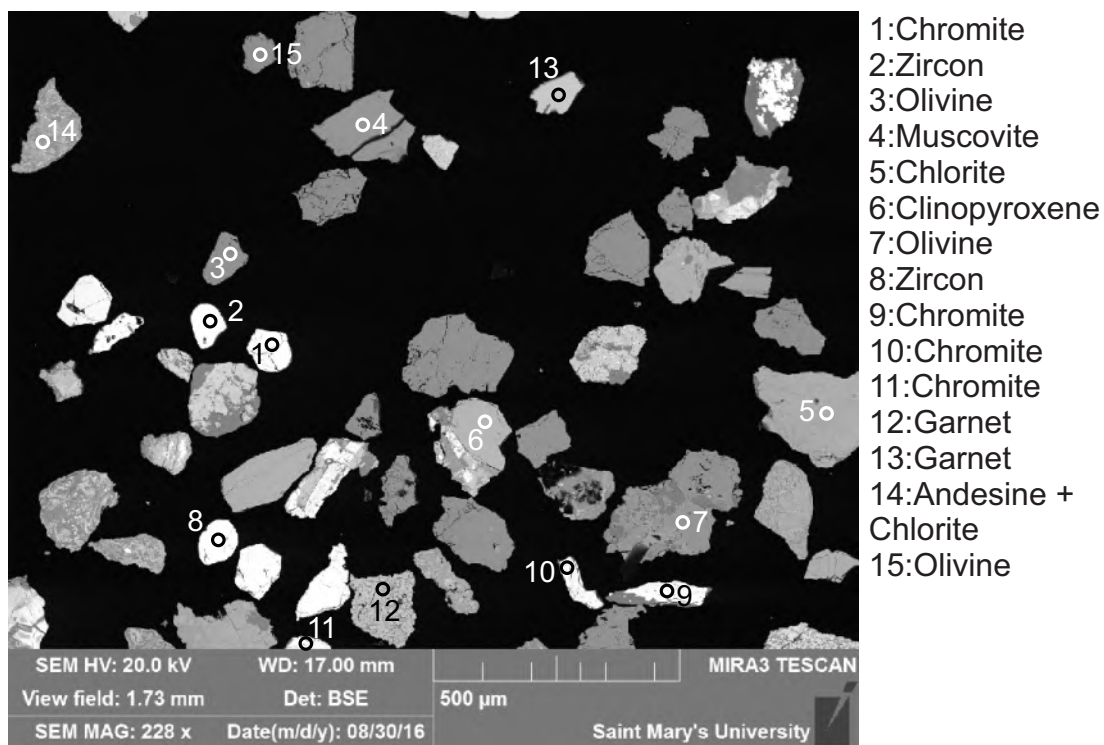

Figure B4.9: Sample S9 site 8 (SEM).



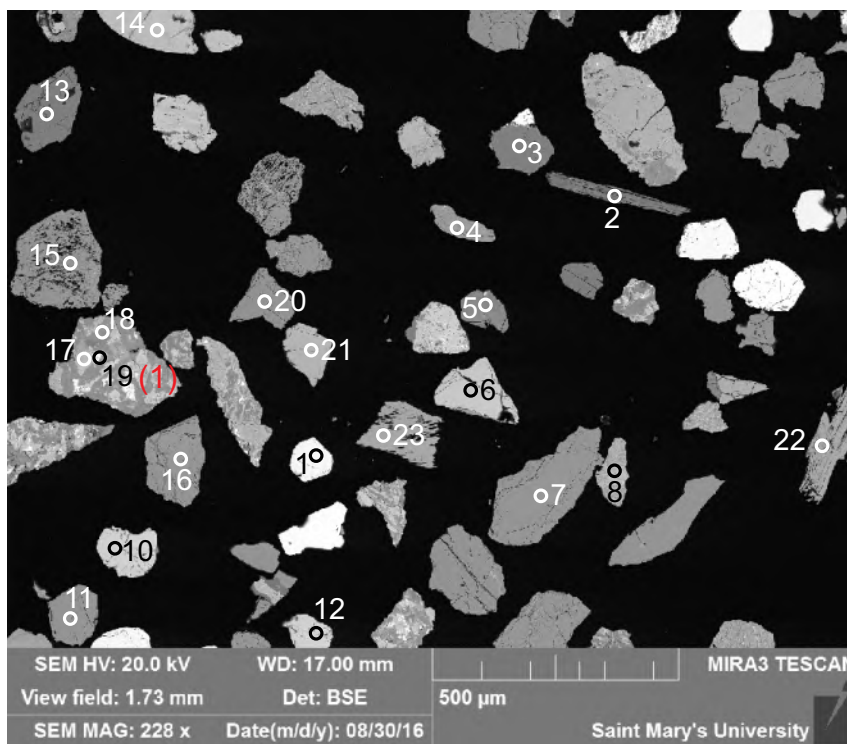

- 1:Chromite
- 2:?
- 3:Quartz
- 4:Muscovite +
- 5:Tourmaline
- 6:Spinel
- 7:Olivine
- 8:Amphibole
- 9:Chromite
- 10:?Garnet
- 11:Olivine
- 12:Apatite
- 13:Dolomite
- 14:Amphibole
- 15:Olivine
- 16:Olivine
- 17:Clinopyroxene
- 18:Oligoclase
- 19:Fe-oxide/hydroxide
- +
- 20:Olivine
- 21:Clinopyroxene
- 22:Chlorite
- 23:Clinopyroxene

Figure B4.10: Sample S9 site 9 (SEM). 1: Lithic clast (clinopyroxene + oligoclase + Fe-oxide/hydroxide, igneous).

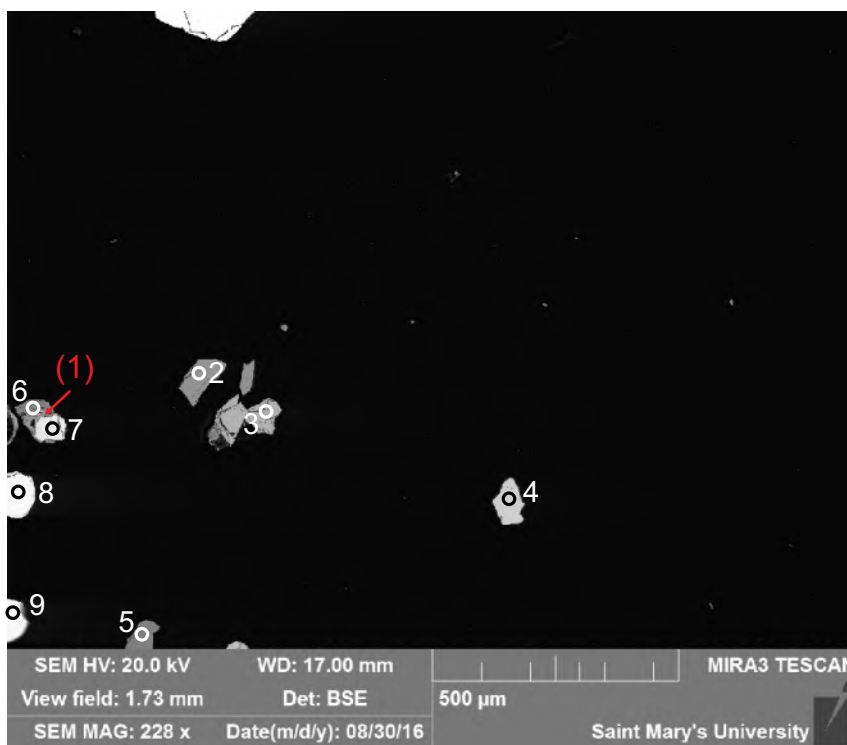

- 1:Chromite
- 2:Olivine
- 3:Clinopyroxene
- 4:Garnet
- 5:Quartz
- 6:Quartz +
- 7:Spinel
- 8:Chromite
- 9:Chromite

Figure B4.11: Sample S9 site 10 (SEM). 1: Lithic clast (spinel + quartz, metaophiolite?).

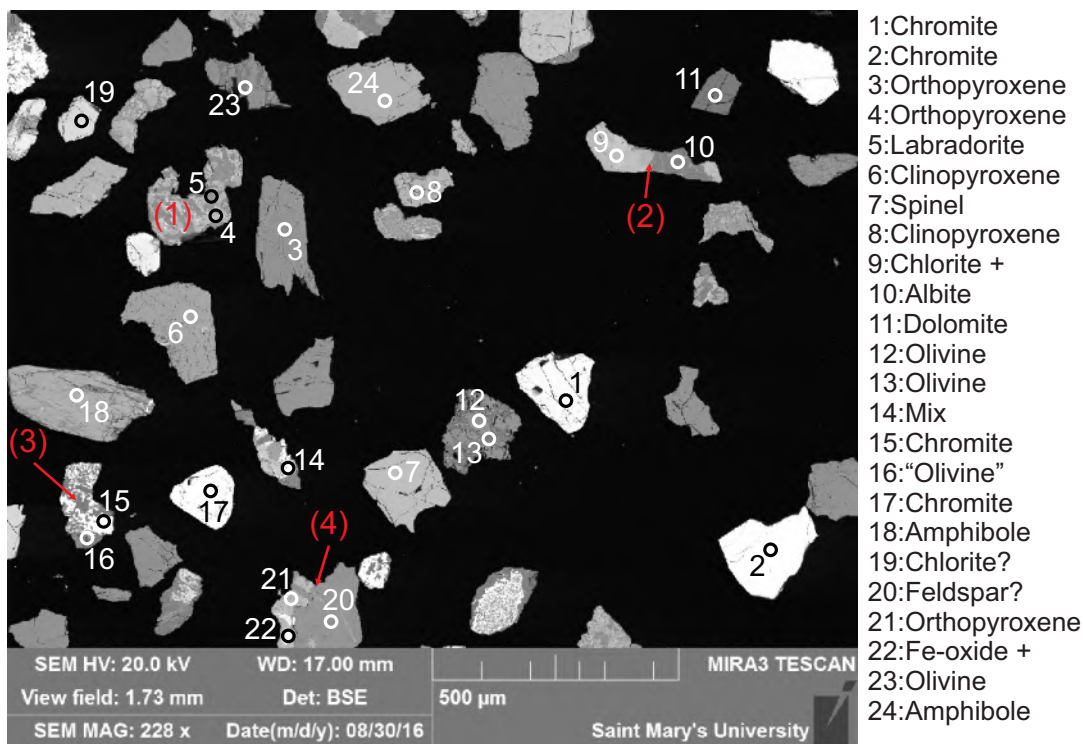

- 1:Chromite
- 2:Chromite
- 3:Orthopyroxene
- 4:Orthopyroxene
- 5:Labradorite
- 6:Clinopyroxene
- 7:Spinel
- 8:Clinopyroxene
- 9:Chlorite +
- 10:Albite
- 11:Dolomite
- 12:Olivine
- 13:Olivine
- 14:Mix
- 15:Chromite
- 16:"Olivine"
- 17:Chromite
- 18:Amphibole
- 19:Chlorite?
- 20:Feldspar?
- 21:Orthopyroxene
- 22:Fe-oxide +
- 23:Olivine
- 24:Amphibole

Figure B4.12: Sample S9 site 11 (SEM). 1: Lithic clast (orthopyroxene + labradorite, igneous). 2: Lithic clast (chlorite + albite, metamorphic). 3: Lithic clast (chromite + olivine, ophiolite). 4: Lithic clast (feldspar? + orthopyroxene + Fe-oxide/hydroxide, igneous).

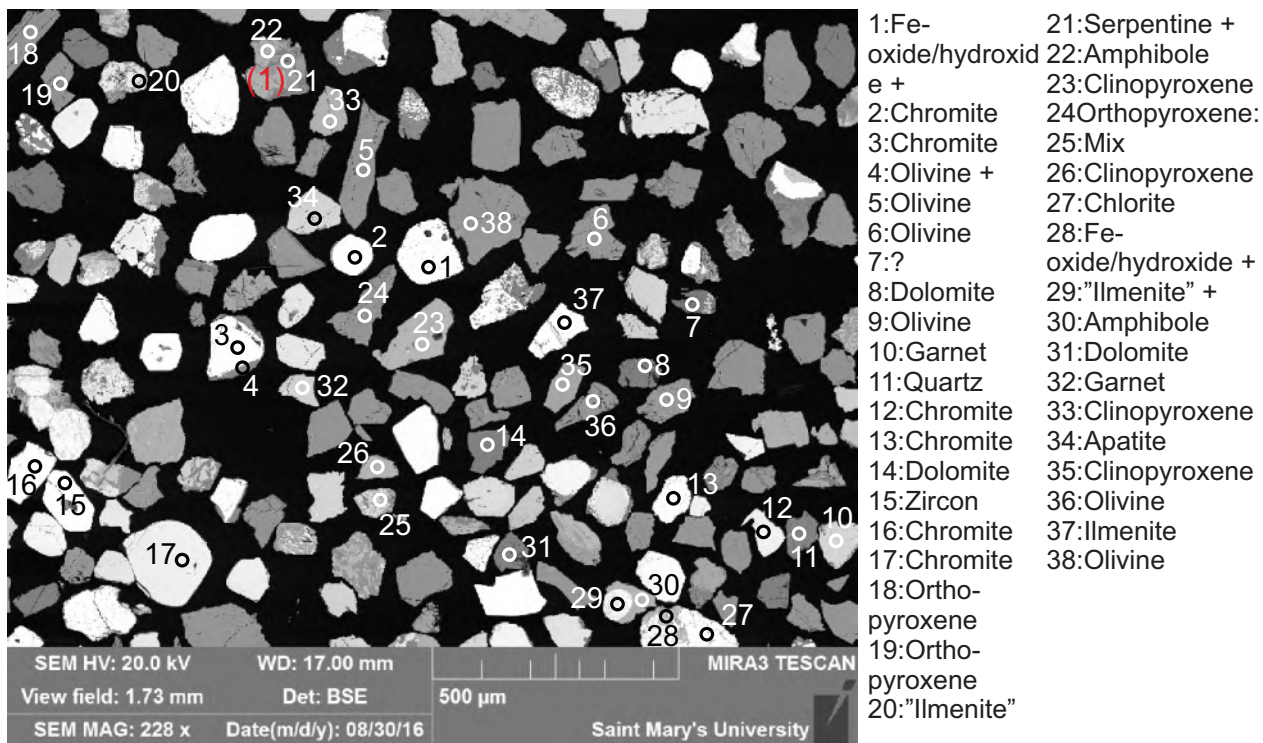

- 1:Fe-oxide/hydroxide +
- 2:Chromite
- 3:Chromite
- 4:Olivine +
- 5:Olivine
- 6:Olivine
- 7:?
- 8:Dolomite
- 9:Olivine
- 10:Garnet
- 11:Quartz
- 12:Chromite
- 13:Chromite
- 14:Dolomite
- 15:Zircon
- 16:Chromite
- 17:Chromite
- 18:Orthopyroxene
- 19:Orthopyroxene
- 20:"Ilmenite"
- 21:Serpentine +
- 22:Amphibole
- 23:Clinopyroxene
- 24:Orthopyroxene
- 25:Mix
- 26:Clinopyroxene
- 27:Chlorite
- 28:Fe-oxide/hydroxide +
- 29:"Ilmenite" +
- 30:Amphibole
- 31:Dolomite
- 32:Garnet
- 33:Clinopyroxene
- 34:Apatite
- 35:Clinopyroxene
- 36:Olivine
- 37:Ilmenite
- 38:Olivine

Figure B4.13: Sample S9 site 12 (SEM). 1: Lithic clast (serpentine + amphibole, ?metaophiolite).

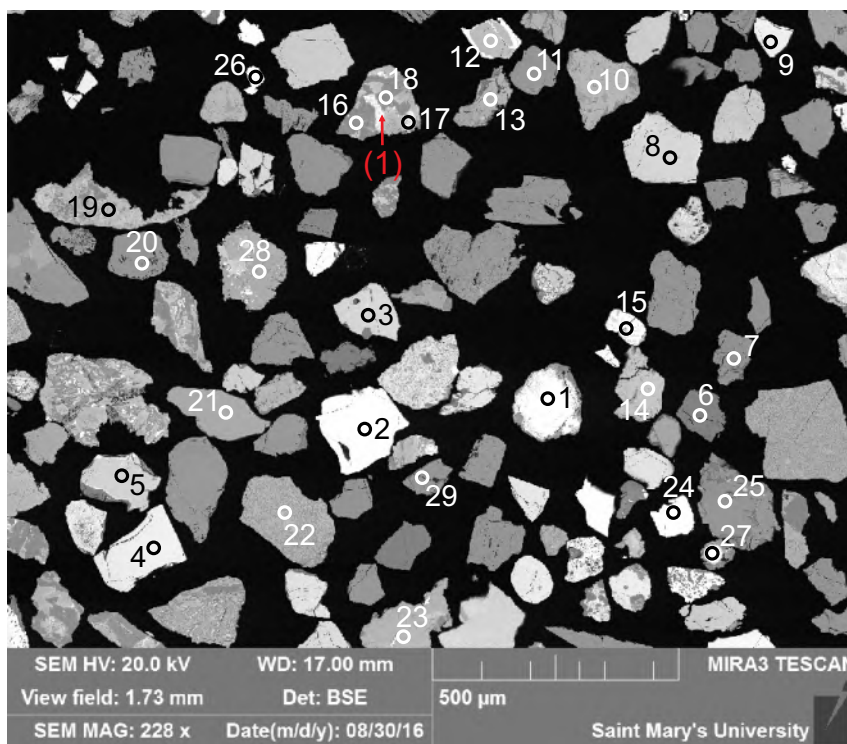

- |                  |                  |
|------------------|------------------|
| 1:"Magnetite"    | 24:Zircon        |
| 2:Chromite       | 25:Orthopyroxene |
| 3:Garnet         | 26:Magnetite     |
| 4:Chromite       | 27:"Magnetite"   |
| 5:Spinel         | 28:Flourite      |
| 6:Dolomite       | 29:Olivine       |
| 7:Olivine        |                  |
| 8:Spinel         |                  |
| 9:Chromite       |                  |
| 10:Epidote       |                  |
| 11:Olivine       |                  |
| 12:Spinel        |                  |
| 13:Clinopyroxene |                  |
| 14:Chlorite      |                  |
| 15:"Ilmenite" +  |                  |
| 16:Oligoclase +  |                  |
| 17:Titanite + ?  |                  |
| 18:Andesine      |                  |
| 19:Mix           |                  |
| 20:Olivine       |                  |
| 21:Clinopyroxene |                  |
| 22:Mix           |                  |
| 23:Chlorite      |                  |

Figure B4.14: Sample S9 site 13 (SEM). 1: Lithic clast (oligoclase + andesine + titanite + Fe-oxide/hydroxide, ?metamorphic).

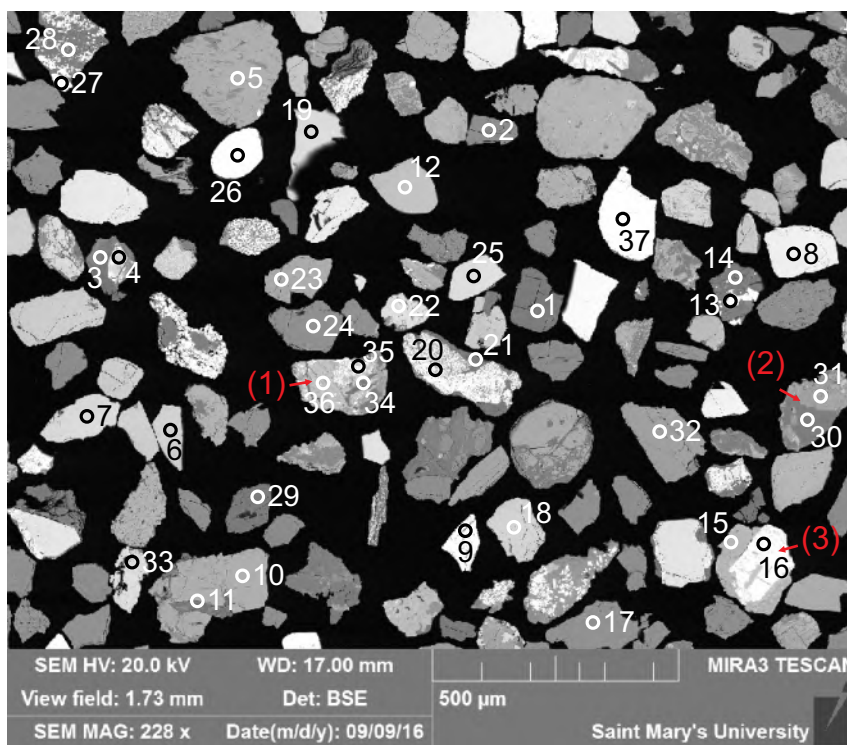

- |                         |                                  |
|-------------------------|----------------------------------|
| 1:Dolomite              | 27:"Magnetite"                   |
| 2:Olivine               | 28:Fe-oxide/hydroxide +          |
| 3:Serpentine            | 29:Dolomite                      |
| 4:Spinel                | 30:Albite                        |
| 5:Chlorite              | 31:Chlorite                      |
| 6:Chlorite              | 32:Clinopyroxene                 |
| 7:Chromite              | 33:TiO <sub>2</sub>              |
| 8:Chromite              | 34:Albite                        |
| 9:Ti-Magnetite          | 35:Titanite + Fe-oxide/hydroxide |
| 10:Clinopyroxene        | 36:Titanite                      |
| 11:Albite +             | 37:"Ilmenite"                    |
| 12:Spinel               |                                  |
| 13:Fe-oxide/hydroxide + |                                  |
| 14:Serpentine           |                                  |
| 15:Clinopyroxene        |                                  |
| 16:"Ilmenite" +         |                                  |
| 17:Olivine              |                                  |
| 18:Spinel               |                                  |
| 19:Spinel               |                                  |
| 20:Chromite +           |                                  |
| 21:Al-Serpentine        |                                  |
| 22:TiO <sub>2</sub>     |                                  |
| 23:Clinopyroxene        |                                  |
| 24:Olivine              |                                  |
| 25:TiO <sub>2</sub>     |                                  |
| 26:Chromite             |                                  |

Figure B4.15: Sample S9 site 14 (SEM). 1: Lithic clast (titanite +Fe-oxide/hydroxide + albite, metamorphic). 2: Lithic clast (albite + chlorite, metamorphic). 3: Lithic clast (clinopyroxene + "ilmenite", igneous).



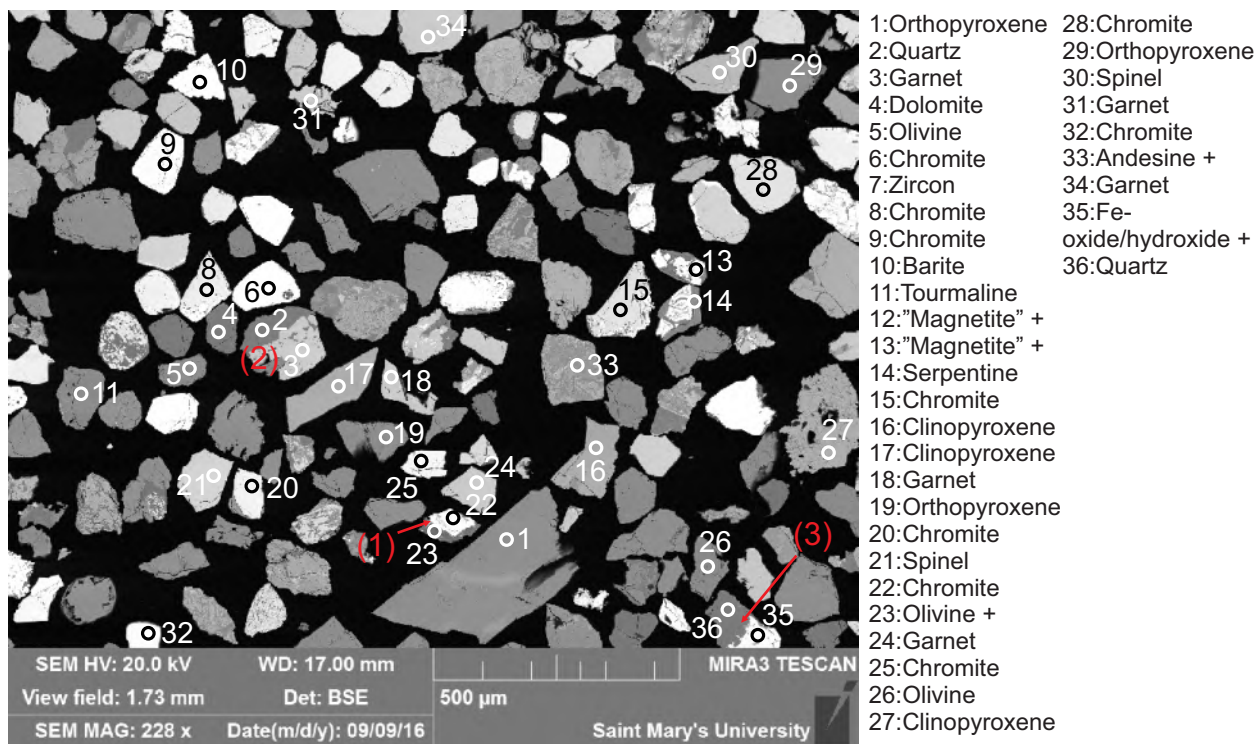

Figure B4.16: Sample S9 site 15 (SEM). 1: Lithic clast (chromite + "olivine", ophiolite). 2: Lithic clast (quartz + garnet, metamorphic). 3: Lithic clast (quartz + Fe-oxide/hydroxide, metamorphic or hydrothermal).

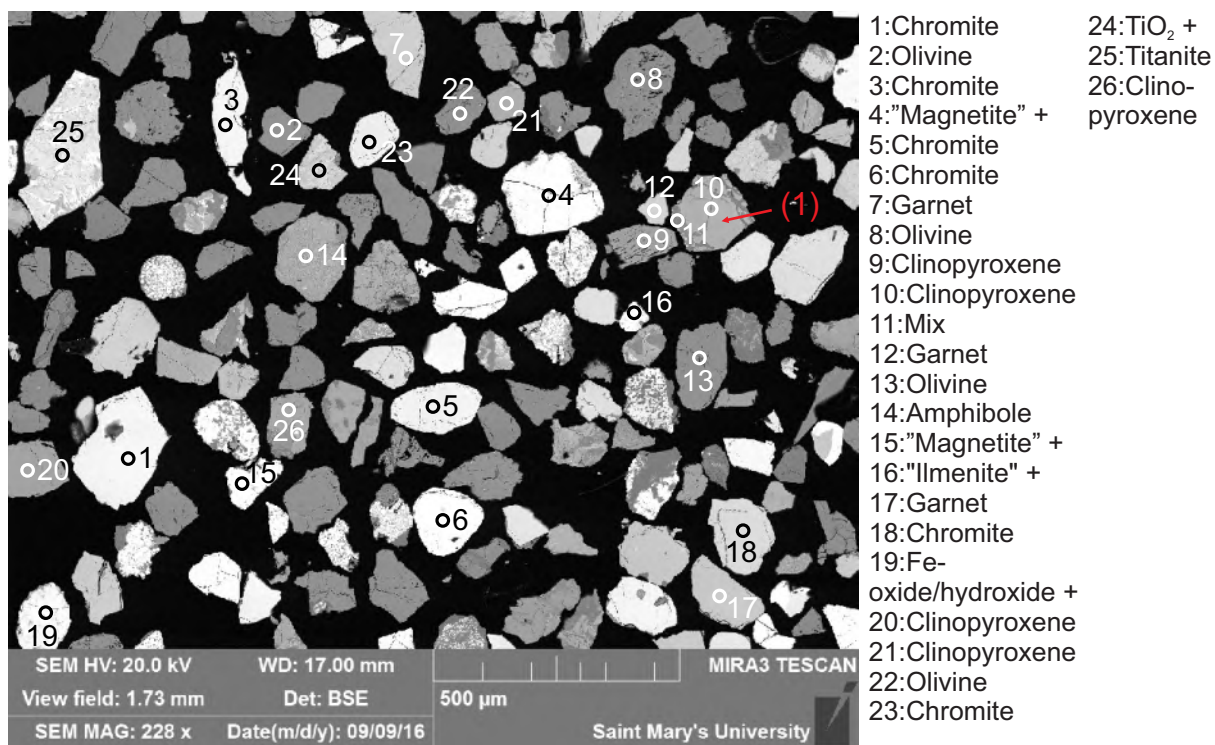

Figure B4.17: Sample S9 site 16 (SEM). 1: Altered grain of clinopyroxene.



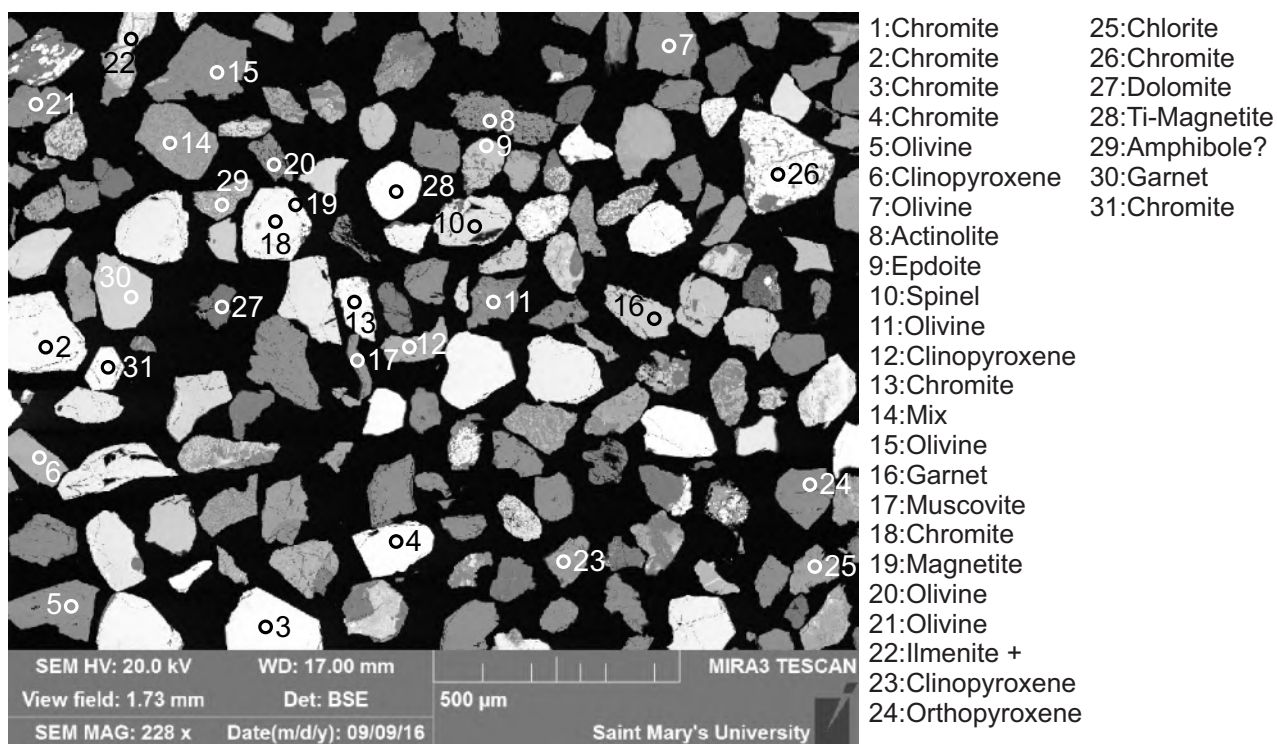

Figure B4.18: Sample S9 site 17 (SEM).

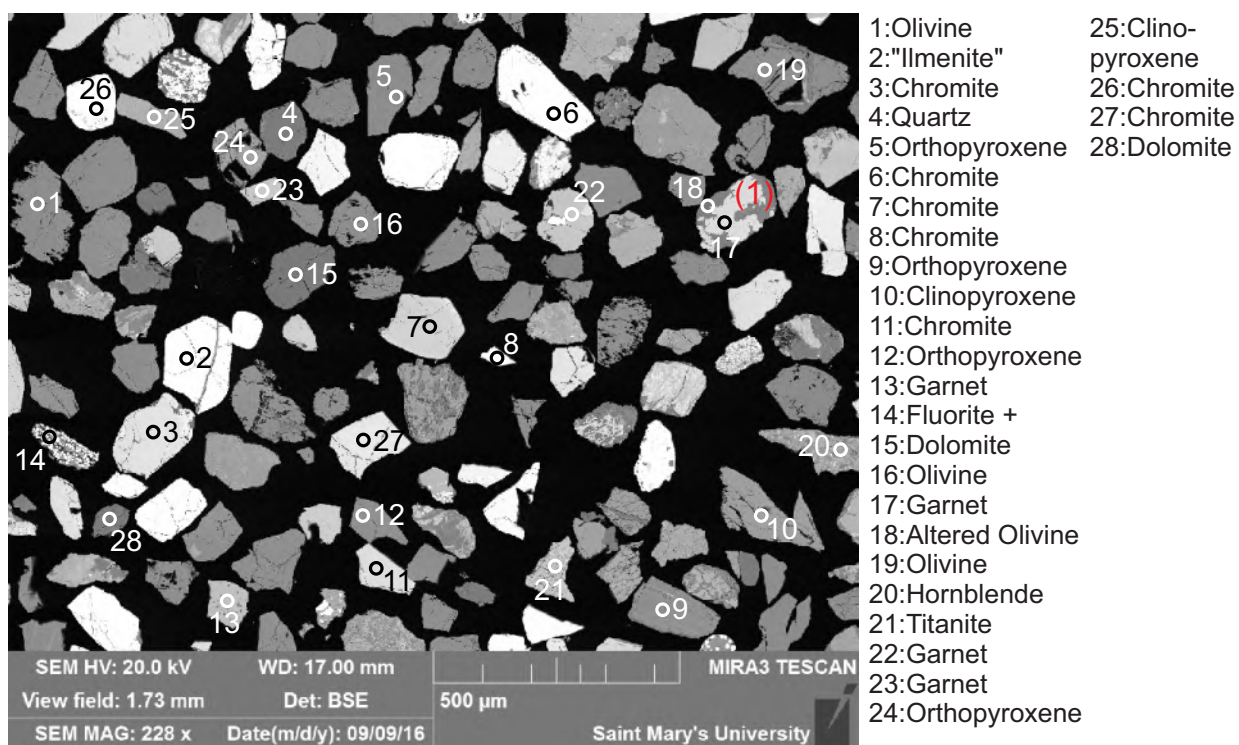

Figure B4.19: Sample S9 site 18 (SEM). 1: Lithic clast (grossular garnet + olivine, ?ophiolite).

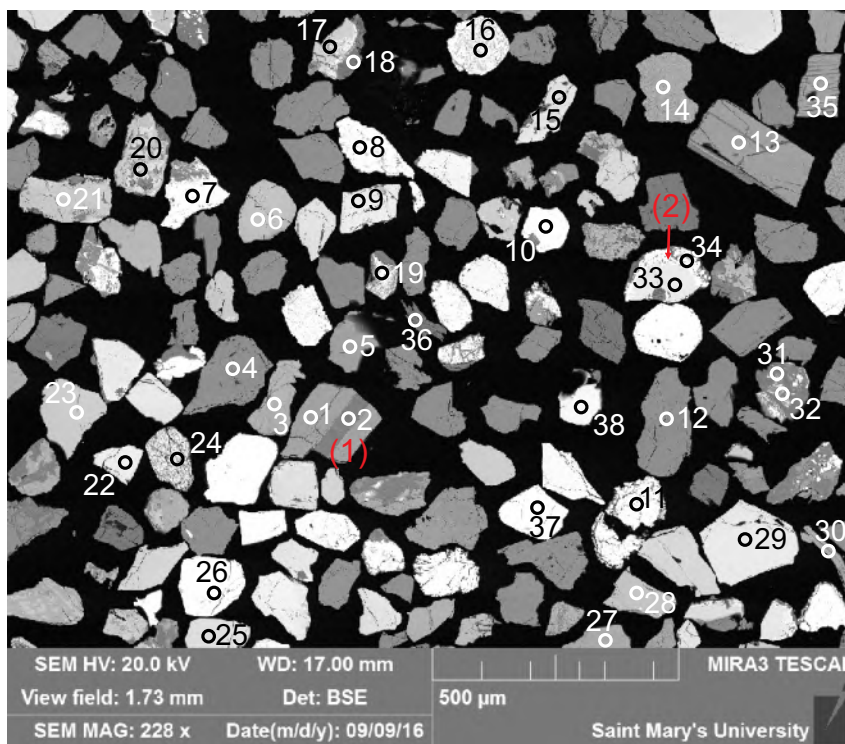

- |                         |                              |
|-------------------------|------------------------------|
| 1: Clinopyroxene        | 23: Garnet                   |
| 2: Olivine +            | 24: $\text{TiO}_2$ + ?Garnet |
| 3: Chlorite             | 25: $\text{TiO}_2$           |
| 4: Olivine              | 26: Chromite                 |
| 5: Clinopyroxene        | 27: Chlorite                 |
| 6: Spinel               | 28: Spinel                   |
| 7: Fe-oxide/hydroxide + | 29: Chromite                 |
| 8: "Magnetite" +        | 30: Biotite                  |
| 9: Chromite             | 31: Olivine                  |
| 10: "Ilmenite" +        | 32: Mix                      |
| 11: Pyrite              | 33: Chromite                 |
| 12: Olivine             | 34: Magnetite +              |
| 13: Clinopyroxene       | 35: Clinopyroxene            |
| 14: Mix                 | 36: Illite                   |
| 15: Chromite            | 37: Ti-Magnetite             |
| 16: "Ilmenite" +        | 38: Chromite                 |
| 17: Spinel +            |                              |
| 18: Chlorite            |                              |
| 19: Chromite +          |                              |
| 20: $\text{TiO}_2$ +    |                              |
| ?Plagioclase            |                              |
| 21: Spinel              |                              |
| 22: Chromite            |                              |

Figure B4.20: Sample S9 site 19 (SEM). 1: Lithic clast (olivine + clinopyroxene, igneous). 2: Lithic clast (chromite + magnetite, ophiolite).

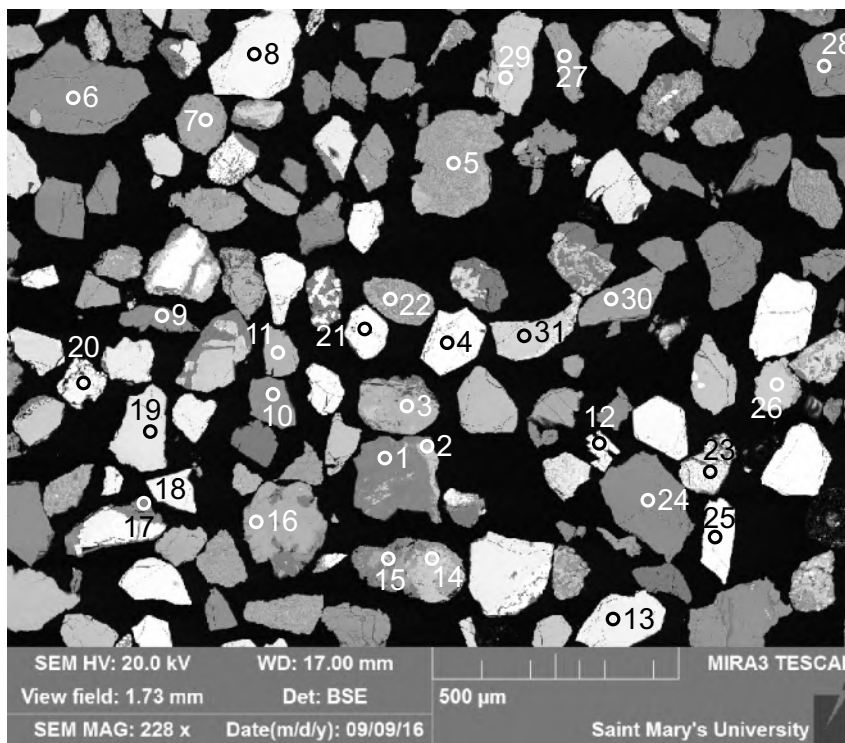

- |                    |                   |
|--------------------|-------------------|
| 1: "Olivine"       | 25: Chromite      |
| 2: Mix             | 26: Garnet        |
| 3: Epidote         | 27: Chlorite      |
| 4: Chromite        | 28: Olivine       |
| 5: Andesine +      | 29: Garnet        |
| 6: Olivine         | 30: Clinopyroxene |
| 7: Epidote         | 31: Spinel        |
| 8: Chromite        |                   |
| 9: Olivine         |                   |
| 10: Orthopyroxene  |                   |
| 11: Garnet         |                   |
| 12: Ti-Magnetite + |                   |
| 13: Chromite       |                   |
| 14: Titanite       |                   |
| 15: Mix            |                   |
| 16: Chlorite       |                   |
| 17: Chromite       |                   |
| 18: Olivine        |                   |
| 19: Chromite       |                   |
| 20: Pyrite +       |                   |
| 21: Chromite       |                   |
| 22: Plagioclase +  |                   |
| 23: "Ilmenite" +   |                   |
| 24: Olivine        |                   |

Figure B4.21: Sample S9 site 20 (SEM).



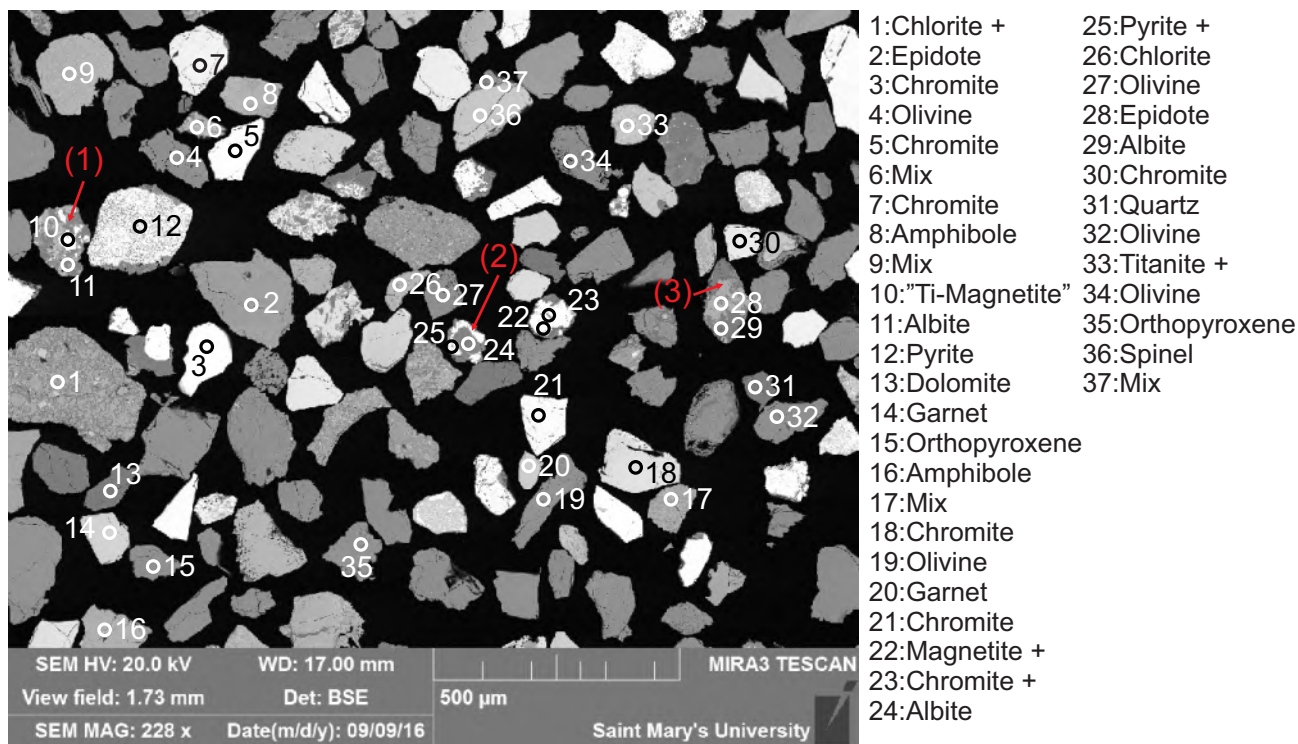

Figure B4.22: Sample S9 site 21 (SEM). 1: Lithic clast (Ti-magnetite + albite, ?igneous). 2: Lithic clast (albite + pyrite, ?uncertain origin). 3: Lithic clast (epidote + albite, metamorphic or hydrothermal).

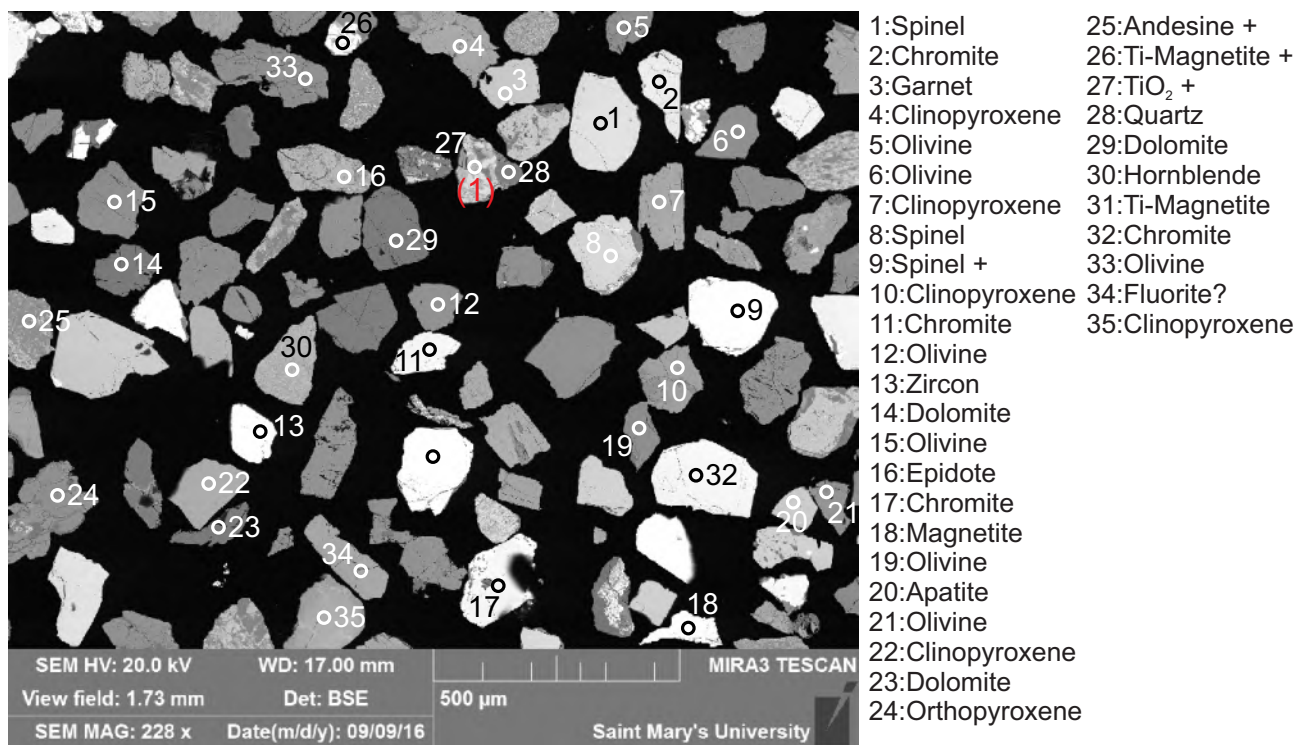

Figure B4.23: Sample S9 site 22 (SEM). 1: Lithic clast (titania + quartz, metamorphic).

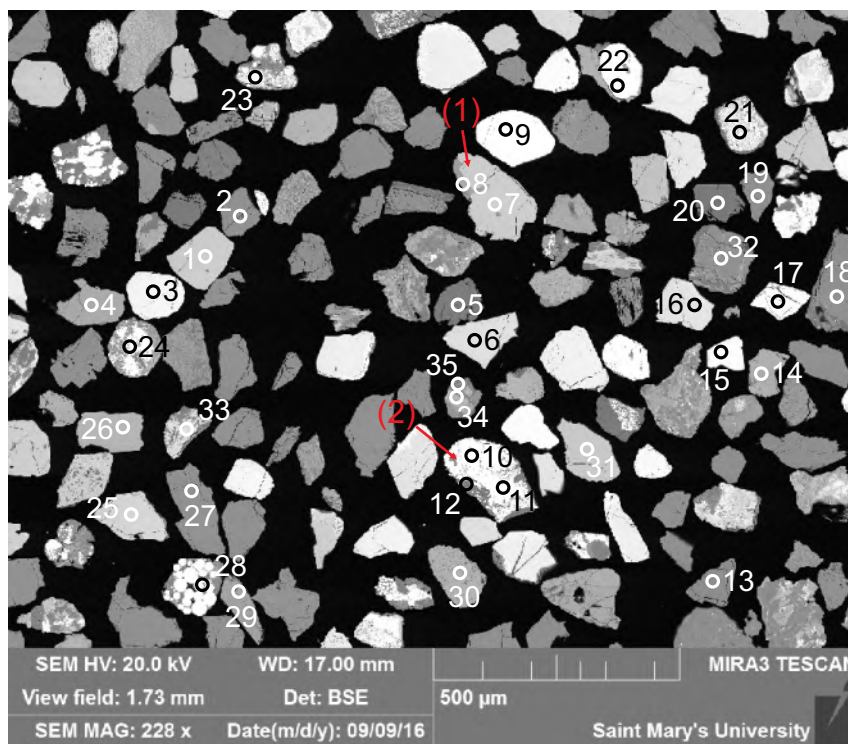

- |                   |                         |
|-------------------|-------------------------|
| 1: Spinel         | 25: Spinel              |
| 2: Olivine        | 26: Clinopyroxene       |
| 3: Chromite       | 27: Olivine             |
| 4: Clinopyroxene  | 28: Fe-oxide/hydroxide+ |
| 5: Dolomite       | 29: Actinolite          |
| 6: Chromite       | 30: Epidote             |
| 7: Garnet         | 31: Epidote             |
| 8: Chlorite       | 32: Olivine             |
| 9: Zircon         | 33: Garnet              |
| 10: Chromite +    | 34: Epidote             |
| 11: Chromite +    | 35: Albite              |
| 12: "Olivine"     |                         |
| 13: Olivine       |                         |
| 14: Epidote       |                         |
| 15: Chromite      |                         |
| 16: Chromite      |                         |
| 17: Chromite      |                         |
| 18: Olivine       |                         |
| 19: Orthopyroxene |                         |
| 20: Dolomite      |                         |
| 21: Chromite +    |                         |
| 22: Ti-Magnetite  |                         |
| 23: Pyrite        |                         |
| 24: Ti-Magnetite  |                         |

Figure B4.24: Sample S9 site 23 (SEM). 1: Lithic clast (garnet + chlorite, metamorphic). 2: Lithic clast (chromite + olivine, ophiolite).

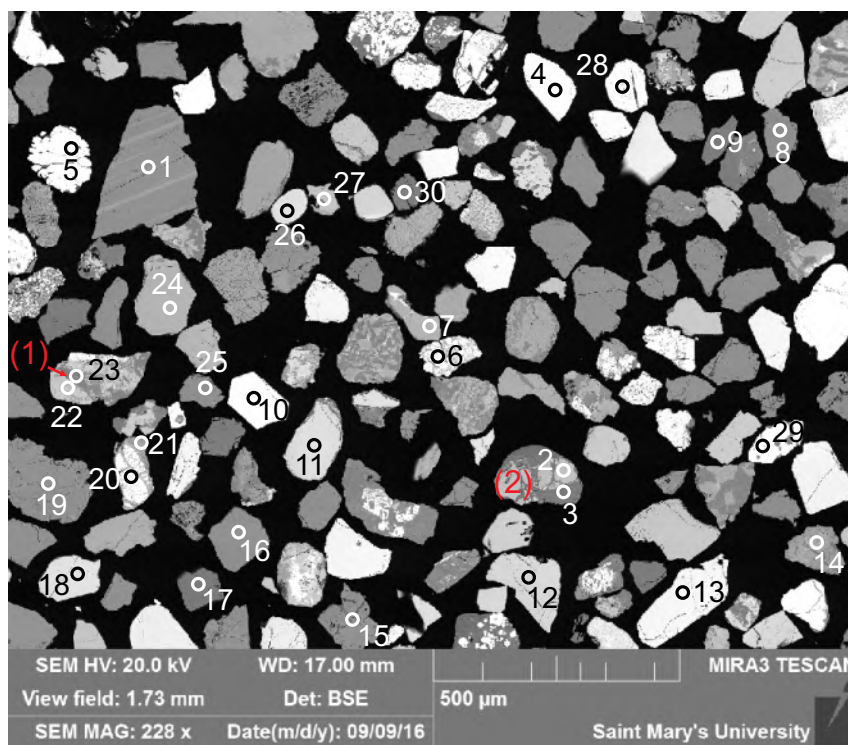

- |                                 |                   |
|---------------------------------|-------------------|
| 1: Orthopyroxene                | 24: Clinopyroxene |
| 2: Spinel                       | 25: Olivine       |
| 3: "Orthopyroxene" or "Olivine" | 26: Chromite      |
| 4: Zircon                       | 27: Titanite      |
| 5: Magnetite +                  | 28: Magnetite     |
| 6: Pyrite                       | 29: Zircon        |
| 7: Spinel                       | 30: Dolomite      |
| 8: Olivine                      |                   |
| 9: Quartz                       |                   |
| 10: Chromite                    |                   |
| 11: Spinel                      |                   |
| 12: Titanite                    |                   |
| 13: Chromite                    |                   |
| 14: Olivine                     |                   |
| 15: Olivine                     |                   |
| 16: Olivine                     |                   |
| 17: Dolomite                    |                   |
| 18: Chromite                    |                   |
| 19: Orthopyroxene               |                   |
| 20: Magnetite                   |                   |
| 21: Amphibole                   |                   |
| 22: Titanite                    |                   |
| 23: Albite                      |                   |

Figure B4.25: Sample S9 site 24 (SEM). 1: Lithic clast (titanite + albite, metamorphic). 2: Lithic clast (spinel + orthopyroxene, ophiolite).



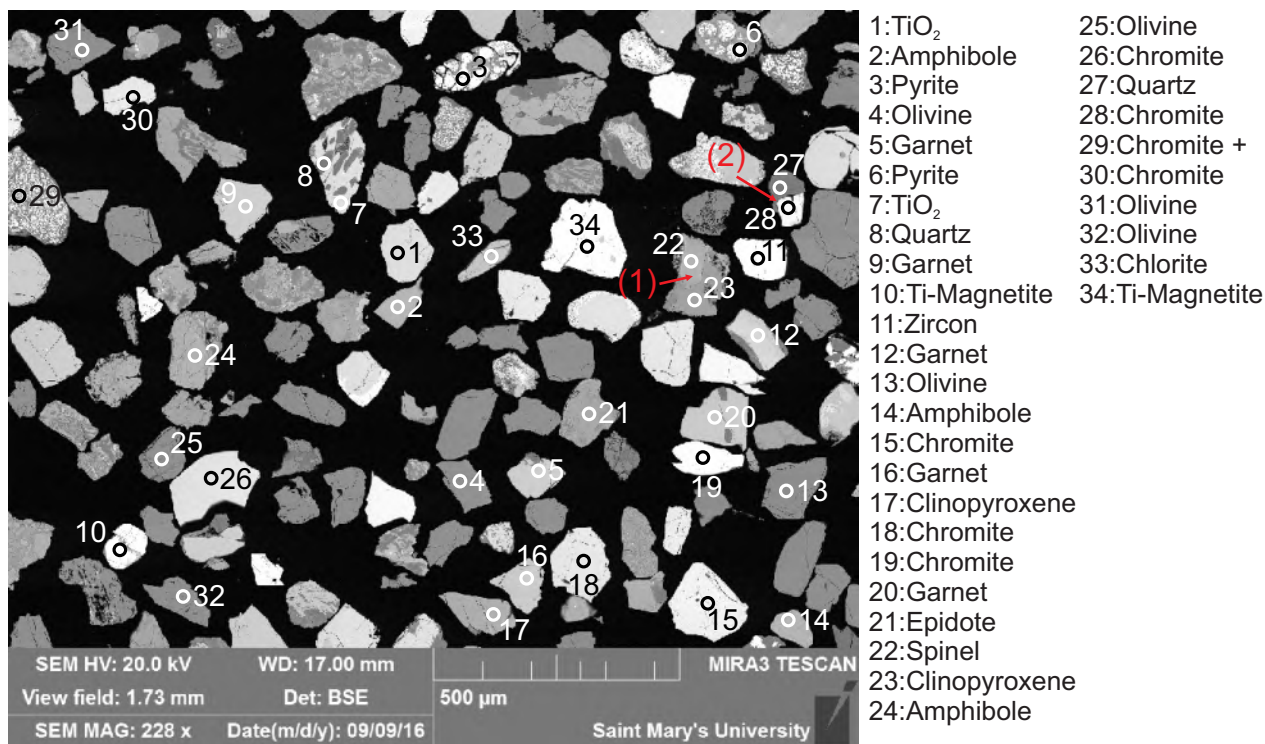

Figure B4.26: Sample S9 site 25 (SEM). 1: Lithic clast (spinel + clinopyroxene, ophiolite). 2: Lithic clast (quartz + chromite, metamorphic or sandstone).

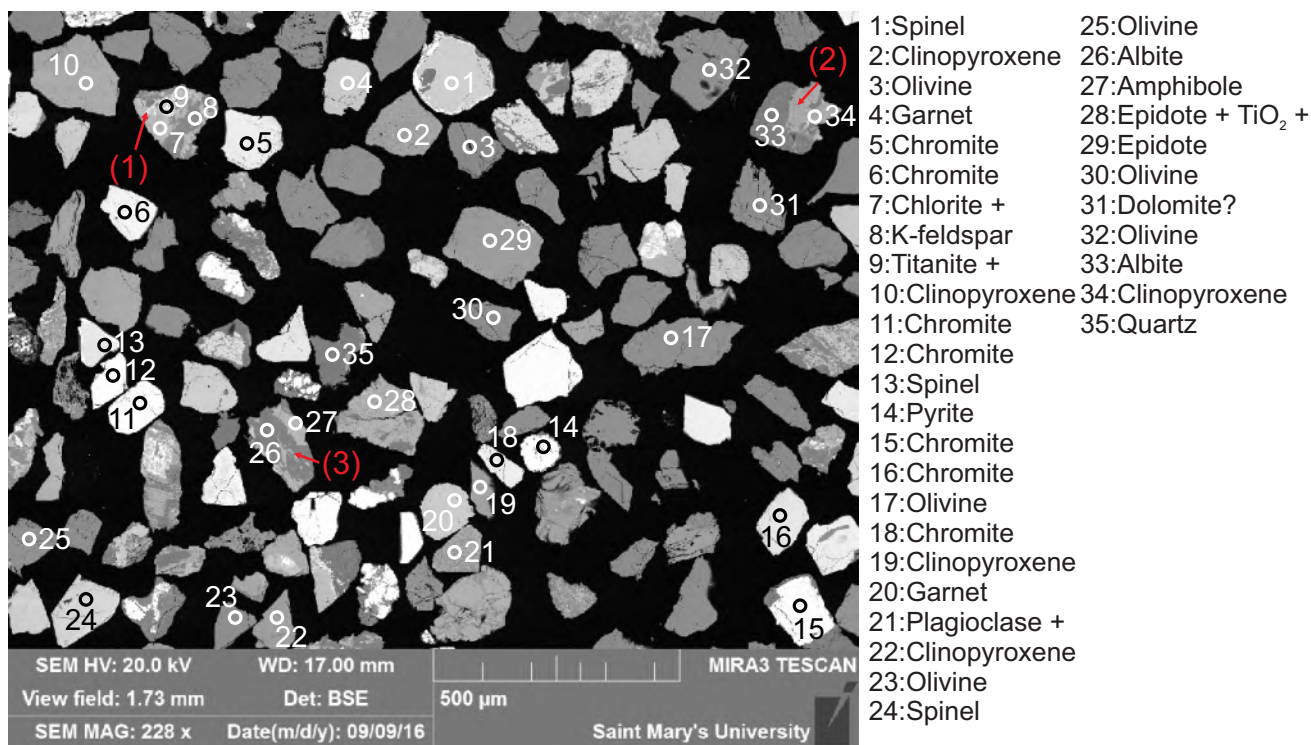

Figure B4.27: Sample S9 site 26 (SEM). 1: Lithic clast (chlorite + K-feldspar + titanite, igneous). 2: Lithic clast (albite + clinopyroxene, igneous or metamorphic). 3: Lithic clast (albite + amphibole, igneous).

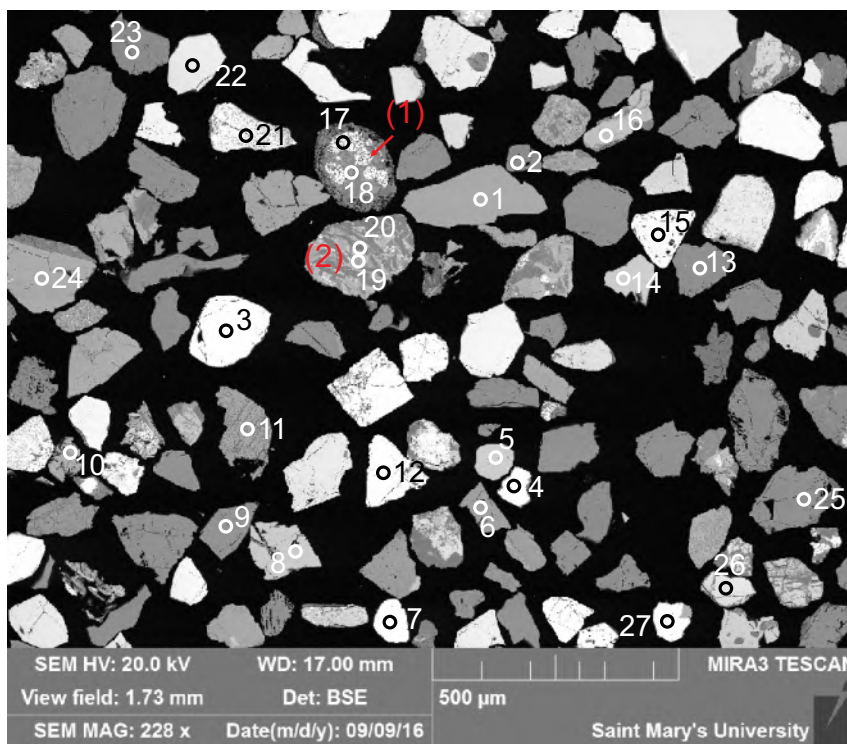

- |                   |                    |
|-------------------|--------------------|
| 1: Clinopyroxene  | 24: Clinopyroxene  |
| 2: Orthopyroxene  | 25: Olivine        |
| 3: Chromite       | 26: Chromite       |
| 4: Zircon         | 27: Ti-Magnetite + |
| 5: Garnet         |                    |
| 6: Clinopyroxene  |                    |
| 7: Monazite       |                    |
| 8: Garnet         |                    |
| 9: Olivine        |                    |
| 10: Chlorite      |                    |
| 11: Clinopyroxene |                    |
| 12: "Magnetite" + |                    |
| 13: Olivine       |                    |
| 14: Chlorite      |                    |
| 15: Chromite      |                    |
| 16: Chlorite      |                    |
| 17: Pyrite        |                    |
| 18: Fluorite +    |                    |
| 19: Chlorite +    |                    |
| Plagioclase       |                    |
| 20: Albite        |                    |
| 21: Chromite      |                    |
| 22: Spinel        |                    |
| 23: Olivine       |                    |

Figure B4.28: Sample S9 site 27 (SEM). 1: Dissolved lithic clast of fluorite + pyrite, hydrothermal or diagenetic. 2: Lithic clast (chlorite + plagioclase, igneous).

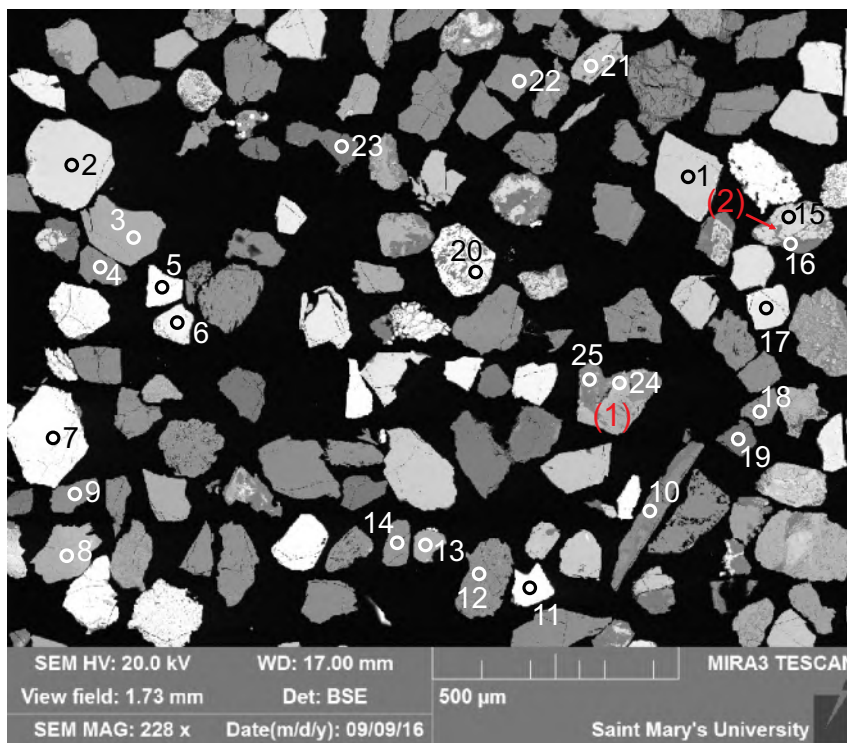

- |                   |              |
|-------------------|--------------|
| 1: Spinel         | 25: Quartz + |
| 2: Chromite       |              |
| 3: Clinopyroxene  |              |
| 4: Olivine        |              |
| 5: Ti-Magnetite   |              |
| 6: Spinel         |              |
| 7: Chromite       |              |
| 8: Clinopyroxene  |              |
| 9: Olivine        |              |
| 10: Orthopyroxene |              |
| 11: Zircon        |              |
| 12: Olivine       |              |
| 13: Spinel        |              |
| 14: Bad Analysis  |              |
| 15: Garnet        |              |
| 16: "Olivine"     |              |
| 17: Chromite      |              |
| 18: Olivine       |              |
| 19: Dolomite      |              |
| 20: Chromite      |              |
| 21: Garnet        |              |
| 22: Olivine       |              |
| 23: Quartz        |              |
| 24: Amphibole     |              |

Figure B4.29: Sample S9 site 28 (SEM). 1: Lithic clast (quartz + amphibole, igneous or metamorphic). 2: Lithic clast (altered olivine + grossular garnet, metaophiolite).

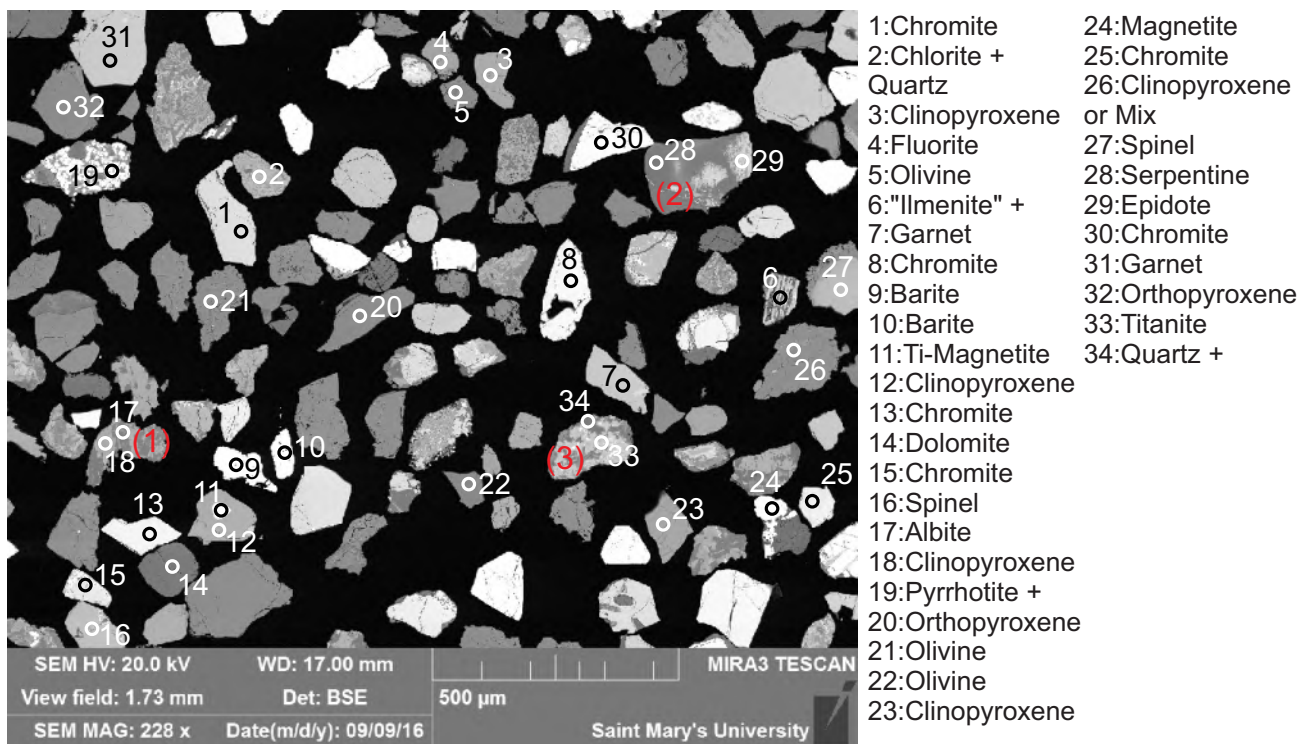

Figure B4.30: Sample S9 site 29 (SEM). 1: Lithic clast (albite + clinopyroxene, igneous). 2: Lithic clast (serpentine + epidote, hydrothermal in ophiolite). 3: Lithic clast (quartz + titanite, ?metamorphic).



Table B4.1: EDS analyses of sample S9.

| Sample | Site | Position | Mineral    | SiO2   | TiO2  | Al2O3 | FeO   | MnO  | MgO   | CaO   | Na2O | K2O  | P2O5 | SO3   | F | Cl   | V2O5 | Cr2O3 | NiO  | ZnO | As2O3 | ZrO2 | Ce2O3 | WO3  | Total | Actual Total |
|--------|------|----------|------------|--------|-------|-------|-------|------|-------|-------|------|------|------|-------|---|------|------|-------|------|-----|-------|------|-------|------|-------|--------------|
| S9     | 1    | 1        | Chr        |        |       | 15.05 | 22.74 |      | 10.50 |       |      |      |      |       |   |      | 0.45 | 51.27 |      |     |       |      |       |      | 100   | 101          |
| S9     | 1    | 2        | Feohy +    | 10.92  |       | 0.56  | 82.53 |      |       | 0.67  |      |      |      |       |   |      |      | 0.50  |      |     |       |      |       | 4.82 | 100   | 77           |
| S9     | 1    | 3        | Chr        |        |       | 16.92 | 19.81 |      | 11.44 |       |      |      |      |       |   |      |      | 51.83 |      |     |       |      |       |      | 100   | 108          |
| S9     | 1    | 4        | Chr        |        |       | 19.43 | 18.47 |      | 12.02 |       |      |      |      |       |   |      |      | 50.09 |      |     |       |      |       |      | 100   | 111          |
| S9     | 1    | 5        | Chr        |        |       | 13.10 | 20.44 |      | 9.67  |       |      |      |      |       |   |      | 0.46 | 56.34 |      |     |       |      |       |      | 100   | 105          |
| S9     | 1    | 6        | Chr        |        | 0.31  | 16.73 | 23.23 |      | 10.27 |       |      |      |      |       |   |      |      | 49.46 |      |     |       |      |       |      | 100   | 108          |
| S9     | 1    | 7        | Chr        |        |       | 17.80 | 25.44 |      | 10.51 |       |      |      |      |       |   |      | 0.42 | 45.83 |      |     |       |      |       |      | 100   | 107          |
| S9     | 1    | 8        | Grt        | 40.29  |       | 21.40 | 30.38 | 0.45 | 5.10  | 2.39  |      |      |      |       |   |      |      |       |      |     |       |      |       |      | 100   | 110          |
| S9     | 1    | 9        | TiO2 +     | 1.17   | 98.01 | 0.42  | 0.41  |      |       |       |      |      |      |       |   |      |      |       |      |     |       |      |       |      | 100   | 101          |
| S9     | 1    | 10       | Qz +       | 96.84  | 3.16  |       |       |      |       |       |      |      |      |       |   |      |      |       |      |     |       |      |       |      | 100   | 118          |
| S9     | 1    | 11       | Grt        | 40.59  |       | 21.72 | 28.02 | 0.69 | 3.37  | 5.62  |      |      |      |       |   |      |      |       |      |     |       |      |       |      | 100   | 107          |
| S9     | 1    | 12       | Amph (Ged) | 43.32  |       | 17.50 | 14.56 |      | 19.00 | 0.98  | 1.27 | 0.36 |      |       |   |      |      |       |      |     |       |      |       |      | 97    | 75           |
| S9     | 1    | 13       | Chr        |        | 1.09  | 24.46 | 24.84 |      | 12.82 |       |      |      |      |       |   |      | 0.48 | 36.30 |      |     |       |      |       |      | 100   | 81           |
| S9     | 1    | 14       | Py         | 0.51   |       |       | 43.45 |      |       |       |      |      |      | 55.42 |   |      |      |       |      |     | 0.62  |      |       |      | 100   | 142          |
| S9     | 1    | 15       | Chr        |        |       | 28.24 | 19.42 |      | 13.76 |       |      |      |      |       |   |      |      | 38.57 |      |     |       |      |       |      | 100   | 113          |
| S9     | 1    | 16       | Ep         | 39.87  |       | 20.53 | 11.21 | 3.89 |       | 21.50 |      |      |      |       |   |      |      |       |      |     |       |      |       |      | 97    | 108          |
| S9     | 1    | 17       | Qz         | 100.00 |       |       |       |      |       |       |      |      |      |       |   |      |      |       |      |     |       |      |       |      | 100   | 115          |
| S9     | 1    | 18       | Mag        | 1.94   |       |       | 93.51 |      | 4.55  |       |      |      |      |       |   |      |      |       |      |     |       |      |       |      | 100   | 89           |
| S9     | 1    | 19       | "Ol"       | 50.89  |       | 0.40  | 4.10  |      | 44.60 |       |      |      |      |       |   |      |      |       |      |     |       |      |       |      | 100   | 90           |
| S9     | 1    | 20       | Chr        |        | 0.49  | 28.06 | 23.65 |      | 11.95 |       |      |      |      |       |   |      | 0.54 | 35.31 |      |     |       |      |       |      | 100   | 86           |
| S9     | 1    | 21       | "Ol"       | 51.01  |       | 0.79  | 2.76  |      | 45.20 |       |      |      |      |       |   | 0.24 |      |       |      |     |       |      |       |      | 100   | 67           |
| S9     | 1    | 22       | Chr        |        |       | 31.01 | 15.74 |      | 15.04 |       |      |      |      |       |   |      |      | 38.22 |      |     |       |      |       |      | 100   | 102          |
| S9     | 1    | 23       | Mag +      | 1.82   |       |       | 98.18 |      |       |       |      |      |      |       |   |      |      |       |      |     |       |      |       |      | 100   | 82           |
| S9     | 1    | 24       | Srp        | 41.72  |       |       | 5.83  |      | 37.99 | 0.19  |      |      |      |       |   |      |      |       |      |     |       |      |       | 1.27 | 87    | 77           |
| S9     | 1    | 25       | Ads        | 58.79  |       | 25.89 | 0.89  |      |       | 7.36  | 6.31 | 0.76 |      |       |   |      |      |       |      |     |       |      |       |      | 100   | 113          |
| S9     | 1    | 26       | Ttn +      | 36.11  | 15.56 | 10.11 | 11.39 |      | 7.95  | 16.51 | 0.42 |      | 1.95 |       |   |      |      |       |      |     |       |      |       |      | 100   | 102          |
| S9     | 1    | 27       | Ol         | 42.34  |       |       | 6.70  |      | 50.65 |       |      |      |      |       |   |      |      |       | 0.31 |     |       |      |       |      | 100   | 111          |
| S9     | 1    | 28       | Ol         | 41.92  |       |       | 7.89  |      | 49.86 |       |      |      |      |       |   |      |      |       | 0.33 |     |       |      |       |      | 100   | 114          |
| S9     | 1    | 29       | Ol         | 42.16  |       |       | 7.16  |      | 50.35 |       |      |      |      |       |   |      |      |       | 0.32 |     |       |      |       |      | 100   | 116          |
| S9     | 1    | 30       | Ol         | 42.33  |       |       | 7.35  |      | 49.99 |       |      |      |      |       |   |      |      |       | 0.32 |     |       |      |       |      | 100   | 111          |
| S9     | 1    | 31       | Ol         | 42.29  |       |       | 6.25  |      | 51.18 |       |      |      |      |       |   |      |      |       | 0.28 |     |       |      |       |      | 100   | 110          |
| S9     | 1    | 32       | Ol         | 44.22  |       | 0.42  | 8.99  |      | 45.92 |       |      |      |      |       |   |      |      |       | 0.45 |     |       |      |       |      | 100   | 95           |
| S9     | 1    | 33       | Opx        | 57.36  |       | 2.77  | 6.95  |      | 32.37 | 0.29  |      |      |      |       |   |      |      | 0.26  |      |     |       |      |       |      | 100   | 110          |
| S9     | 1    | 34       | Ol         | 42.20  |       |       | 6.90  |      | 50.53 |       |      |      |      |       |   |      |      |       | 0.37 |     |       |      |       |      | 100   | 127          |
| S9     | 1    | 35       | Opx        | 56.60  |       | 3.39  | 4.92  |      | 33.73 | 0.73  |      |      |      |       |   |      |      | 0.64  |      |     |       |      |       |      | 100   | 114          |
| S9     | 1    | 36       | Opx        | 57.04  |       | 2.16  | 4.87  |      | 33.11 | 2.13  |      |      |      |       |   |      |      | 0.69  |      |     |       |      |       |      | 100   | 124          |
| S9     | 1    | 37       | Ol         | 41.95  |       |       | 8.03  |      | 49.72 |       |      |      |      |       |   |      |      |       | 0.31 |     |       |      |       |      | 100   | 121          |
| S9     | 1    | 38       | Chr        |        |       | 26.37 | 15.70 |      | 14.40 |       |      |      |      |       |   |      |      | 43.52 |      |     |       |      |       |      | 100   | 107          |
| S9     | 1    | 39       | Ttn +      | 36.73  | 13.58 | 11.49 | 15.72 |      | 10.12 | 12.36 |      |      |      |       |   |      |      |       |      |     |       |      |       |      | 100   | 103          |
| S9     | 1    | 40       | Ttn +      | 37.57  | 18.26 | 12.61 | 5.94  |      |       | 25.62 |      |      |      |       |   |      |      |       |      |     |       |      |       |      | 100   | 109          |
| S9     | 1    | 41       | Mix        | 53.45  |       | 15.89 | 17.25 |      | 4.20  | 1.40  |      | 7.82 |      |       |   |      |      |       |      |     |       |      |       |      | 100   | 97           |



Table B4.1: EDS analyses of sample S9.

| Sample | Site | Position | Mineral       | SiO2   | TiO2  | Al2O3 | FeO   | MnO  | MgO   | CaO   | Na2O | K2O  | P2O5 | SO3   | F    | Cl   | V2O5 | Cr2O3 | NiO  | ZnO | As2O3 | ZrO2  | Ce2O3 | WO3 | Total | Actual Total |
|--------|------|----------|---------------|--------|-------|-------|-------|------|-------|-------|------|------|------|-------|------|------|------|-------|------|-----|-------|-------|-------|-----|-------|--------------|
| S9     | 1    | 42       | Ep +          | 43.36  | 0.31  | 22.25 | 8.15  | 0.35 | 4.63  | 17.95 |      |      |      |       |      |      |      |       |      |     |       |       |       |     | 97    | 88           |
| S9     | 1    | 43       | Cpx           | 55.06  | 0.84  | 2.48  | 4.62  |      | 17.29 | 18.92 | 0.47 |      |      |       |      |      |      | 0.32  |      |     |       |       |       |     | 100   | 99           |
| S9     | 1    | 44       | Dol           |        |       |       |       |      | 23.03 | 30.97 |      |      |      |       |      |      |      |       |      |     |       |       |       |     | 54    | 57           |
| S9     | 1    | 45       | OI            | 42.07  |       |       | 8.18  |      | 49.43 |       |      |      |      |       |      |      |      |       | 0.32 |     |       |       |       |     | 100   | 113          |
| S9     | 1    | 46       | Cpx           | 53.36  | 1.06  | 3.52  | 6.18  |      | 16.44 | 19.13 |      |      |      |       |      |      |      | 0.31  |      |     |       |       |       |     | 100   | 108          |
| S9     | 1    | 47       | Cpx           | 55.82  |       | 2.29  | 1.63  |      | 18.25 | 21.33 |      |      |      |       |      |      |      | 0.67  |      |     |       |       |       |     | 100   | 110          |
| S9     | 1    | 48       | Cpx           | 53.75  | 0.53  | 2.10  | 9.69  | 0.29 | 14.80 | 18.53 | 0.32 |      |      |       |      |      |      |       |      |     |       |       |       |     | 100   | 108          |
| S9     | 1    | 49       | Ep            | 42.19  |       | 21.82 | 11.69 |      |       | 20.90 | 0.41 |      |      |       |      |      |      |       |      |     |       |       |       |     | 97    | 106          |
| S9     | 1    | 50       | OI            | 41.94  |       |       | 7.82  |      | 49.89 |       |      |      |      |       |      |      |      |       | 0.36 |     |       |       |       |     | 100   | 118          |
| S9     | 1    | 51       | Ttn +         | 43.87  | 25.62 | 3.58  | 1.44  |      | 1.39  | 22.47 |      |      |      | 0.96  |      | 0.66 |      |       |      |     |       |       |       |     | 100   | 44           |
| S9     | 2    | 1        | Opx           | 57.04  |       | 2.46  | 4.74  |      | 34.66 | 0.36  |      |      |      |       |      |      |      | 0.75  |      |     |       |       |       |     | 100   | 118          |
| S9     | 2    | 2        | Dol           |        |       |       |       |      | 22.93 | 31.07 |      |      |      |       |      |      |      |       |      |     |       |       |       |     | 54    | 55           |
| S9     | 2    | 3        | OI            | 41.89  |       |       | 7.22  |      | 50.47 |       |      |      |      |       |      |      |      |       | 0.42 |     |       |       |       |     | 100   | 113          |
| S9     | 2    | 4        | OI            | 42.09  |       |       | 7.59  |      | 50.32 |       |      |      |      |       |      |      |      |       |      |     |       |       |       |     | 100   | 112          |
| S9     | 2    | 5        | OI            | 42.08  |       |       | 8.27  |      | 49.19 |       |      |      |      |       |      |      |      |       | 0.46 |     |       |       |       |     | 100   | 112          |
| S9     | 2    | 6        | Qz            | 100.00 |       |       |       |      |       |       |      |      |      |       |      |      |      |       |      |     |       |       |       |     | 100   | 124          |
| S9     | 2    | 7        | Cpx           | 55.31  |       | 1.65  | 4.04  |      | 17.36 | 20.82 | 0.35 |      |      |       |      |      |      | 0.47  |      |     |       |       |       |     | 100   | 110          |
| S9     | 2    | 8        | Ms + Chl      | 49.94  |       | 19.64 | 6.53  |      | 3.04  |       | 0.39 | 7.46 |      |       |      |      |      |       |      |     |       |       |       |     | 87    | 98           |
| S9     | 2    | 9        | Feohy + Chl + | 21.65  | 2.88  | 8.61  | 61.86 |      | 1.46  | 0.74  |      | 2.80 |      |       |      |      |      |       |      |     |       |       |       |     | 100   | 95           |
| S9     | 2    | 10       | Cpx           | 52.75  | 1.52  | 2.78  | 8.48  |      | 15.26 | 18.85 | 0.36 |      |      |       |      |      |      |       |      |     |       |       |       |     | 100   | 110          |
| S9     | 2    | 11       | Grt           | 40.00  |       | 20.85 | 21.56 | 2.80 | 0.38  | 14.41 |      |      |      |       |      |      |      |       |      |     |       |       |       |     | 100   | 114          |
| S9     | 2    | 12       | Grt? +        | 37.83  | 0.86  | 1.85  | 23.22 |      | 5.41  | 29.00 |      |      |      |       |      |      |      | 0.29  |      |     |       |       | 1.54  |     | 100   | 101          |
| S9     | 2    | 13       | "OI"          | 50.87  |       |       | 1.49  |      | 46.48 |       |      |      |      |       | 1.16 |      |      |       |      |     |       |       |       |     | 100   | 94           |
| S9     | 2    | 14       | Mag           | 0.90   |       |       | 98.60 |      | 0.50  |       |      |      |      |       |      |      |      |       |      |     |       |       |       |     | 100   | 92           |
| S9     | 2    | 15       | Chr           | 10.46  |       | 18.78 | 20.16 |      | 13.22 |       | 0.46 |      |      |       |      |      |      | 36.93 |      |     |       |       |       |     | 100   | 94           |
| S9     | 2    | 16       | Zrn           | 31.52  |       |       |       |      |       |       |      |      |      |       |      |      |      |       |      |     |       | 68.48 |       |     | 100   | 132          |
| S9     | 2    | 17       | Py            | 0.67   |       | 0.24  | 30.66 |      | 0.24  |       |      |      |      | 68.18 |      |      |      |       |      |     |       |       |       |     | 100   | 209          |
| S9     | 2    | 18       | "Mag" +       | 1.96   |       |       | 98.04 |      |       |       |      |      |      |       |      |      |      |       |      |     |       |       |       |     | 100   | 80           |
| S9     | 2    | 19       | Chr           |        |       | 16.43 | 20.26 |      | 10.89 |       |      |      |      |       |      |      |      | 52.42 |      |     |       |       |       |     | 100   | 109          |
| S9     | 2    | 20       | Chr           |        | 0.44  | 31.63 | 25.26 |      | 10.97 |       |      |      |      |       |      |      |      | 31.70 |      |     |       |       |       |     | 100   | 68           |
| S9     | 2    | 21       | Mix           | 45.65  | 1.20  | 9.21  | 19.82 | 0.40 | 16.24 | 6.84  | 0.63 |      |      |       |      |      |      |       |      |     |       |       |       |     | 100   | 103          |
| S9     | 2    | 22       | Mix           | 58.67  |       | 27.43 | 1.10  |      |       | 3.98  | 5.44 | 3.39 |      |       |      |      |      |       |      |     |       |       |       |     | 100   | 115          |
| S9     | 2    | 23       | "Mag" +       | 4.50   |       |       | 94.99 |      |       | 0.51  |      |      |      |       |      |      |      |       |      |     |       |       |       |     | 100   | 84           |
| S9     | 2    | 24       | OI            | 41.83  |       |       | 7.80  |      | 49.97 |       |      |      |      |       |      |      |      |       | 0.40 |     |       |       |       |     | 100   | 119          |
| S9     | 2    | 25       | Chr           |        |       | 24.63 | 16.14 |      | 14.08 |       |      |      |      |       |      |      |      | 45.15 |      |     |       |       |       |     | 100   | 109          |
| S9     | 3    | 1        | Cpx           | 50.41  | 2.73  | 5.01  | 6.81  |      | 13.66 | 20.77 | 0.61 |      |      |       |      |      |      |       |      |     |       |       |       |     | 100   | 112          |
| S9     | 3    | 2        | Amph?         | 43.81  | 4.64  | 8.20  | 16.31 | 0.39 | 10.14 | 12.16 | 1.05 | 0.31 |      |       |      |      |      |       |      |     |       |       |       |     | 97    | 107          |
| S9     | 3    | 3        | Chr           |        |       | 15.35 | 24.01 |      | 8.95  |       |      |      |      |       |      |      |      | 51.69 |      |     |       |       |       |     | 100   | 106          |
| S9     | 3    | 4        | Qz            | 100.00 |       |       |       |      |       |       |      |      |      |       |      |      |      |       |      |     |       |       |       |     | 100   | 123          |
| S9     | 3    | 5        | "Mag" +       | 5.66   |       |       | 92.85 |      | 1.11  | 0.38  |      |      |      |       |      |      |      |       |      |     |       |       |       |     | 100   | 82           |
| S9     | 3    | 6        | Lab           | 55.94  |       | 27.63 | 0.58  |      |       | 10.37 | 5.49 |      |      |       |      |      |      |       |      |     |       |       |       |     | 100   | 119          |

Table B4.1: EDS analyses of sample S9.

| Sample | Site | Position | Mineral      | SiO2   | TiO2  | Al2O3 | FeO   | MnO  | MgO   | CaO   | Na2O  | K2O  | P2O5 | SO3   | F    | Cl | V2O5 | Cr2O3 | NiO  | ZnO   | As2O3 | ZrO2 | Ce2O3 | WO3  | Total | Actual Total |
|--------|------|----------|--------------|--------|-------|-------|-------|------|-------|-------|-------|------|------|-------|------|----|------|-------|------|-------|-------|------|-------|------|-------|--------------|
| S9     | 3    | 7        | Ol +         | 49.31  |       |       | 8.42  |      | 40.16 | 0.37  |       |      |      |       |      |    |      |       |      |       |       |      |       | 1.74 | 100   | 97           |
| S9     | 3    | 8        | Ol + Feohy + | 44.85  |       | 0.41  | 12.23 |      | 31.34 | 10.08 |       |      |      |       |      |    |      |       |      |       |       |      |       | 1.10 | 100   | 98           |
| S9     | 3    | 9        | Chr +        |        |       | 41.30 | 14.86 |      | 17.05 |       |       |      |      |       |      |    |      | 26.79 |      |       |       |      |       |      | 100   | 115          |
| S9     | 3    | 10       | Cr-Chl       | 33.10  |       | 15.30 | 2.81  |      | 32.02 | 0.18  |       |      |      |       |      |    |      | 1.59  |      |       |       |      |       |      | 85    | 95           |
| S9     | 3    | 11       | Grt +        | 39.79  |       | 21.32 | 28.14 | 1.90 | 3.50  | 5.35  |       |      |      |       |      |    |      |       |      |       |       |      |       |      | 100   | 109          |
| S9     | 3    | 12       | Qz           | 100.00 |       |       |       |      |       |       |       |      |      |       |      |    |      |       |      |       |       |      |       |      | 100   | 119          |
| S9     | 3    | 13       | Ab           | 68.66  |       | 18.99 | 0.34  |      |       | 0.54  | 10.88 | 0.58 |      |       |      |    |      |       |      |       |       |      |       |      | 100   | 114          |
| S9     | 3    | 14       | Cpx          | 49.27  | 4.97  | 2.67  | 15.97 | 0.42 | 9.73  | 16.96 |       |      |      |       |      |    |      |       |      |       |       |      |       |      | 100   | 110          |
| S9     | 3    | 15       | Spl          |        |       | 24.67 | 21.40 |      | 12.50 |       |       |      |      |       |      |    | 0.44 | 41.00 |      |       |       |      |       |      | 100   | 114          |
| S9     | 3    | 16       | Dol          |        |       |       |       |      | 22.65 | 31.35 |       |      |      |       |      |    |      |       |      |       |       |      |       |      | 54    | 57           |
| S9     | 3    | 17       | Sp           |        |       |       | 0.22  |      |       |       |       |      |      | 50.46 |      |    |      |       |      | 49.32 |       |      |       |      | 100   | 185          |
| S9     | 3    | 18       | Ol           | 41.80  |       |       | 7.09  |      | 50.73 |       |       |      |      |       |      |    |      |       | 0.38 |       |       |      |       |      | 100   | 120          |
| S9     | 3    | 19       | Ol           | 41.90  |       |       | 7.17  |      | 50.63 |       |       |      |      |       |      |    |      |       | 0.30 |       |       |      |       |      | 100   | 119          |
| S9     | 3    | 20       | Tlc          | 66.26  |       |       | 0.89  |      | 32.85 |       |       |      |      |       |      |    |      |       |      |       |       |      |       |      | 100   | 123          |
| S9     | 4    | 1        | Cpx          | 52.10  | 1.66  | 4.09  | 5.44  |      | 15.16 | 20.40 | 0.46  |      |      |       |      |    |      | 0.70  |      |       |       |      |       |      | 100   | 117          |
| S9     | 4    | 2        | ? Amph       | 45.81  | 2.56  | 10.15 | 13.47 |      | 12.39 | 10.43 | 2.19  |      |      |       |      |    |      |       |      |       |       |      |       |      | 97    | 113          |
| S9     | 4    | 3        | Cpx          | 52.48  | 1.03  | 3.80  | 7.86  |      | 16.05 | 18.78 |       |      |      |       |      |    |      |       |      |       |       |      |       |      | 100   | 115          |
| S9     | 4    | 4        | Ttn          | 32.19  | 36.66 | 1.14  | 0.92  |      |       | 27.56 |       |      |      |       | 1.53 |    |      |       |      |       |       |      |       |      | 100   | 101          |
| S9     | 4    | 5        | Py           | 0.24   |       |       | 30.61 |      |       |       |       |      |      | 68.91 |      |    |      |       | 0.23 |       |       |      |       |      | 100   | 217          |
| S9     | 4    | 6        | Dol          |        |       |       |       |      | 22.36 | 31.64 |       |      |      |       |      |    |      |       |      |       |       |      |       |      | 54    | 57           |
| S9     | 4    | 7        | Qz           | 99.61  |       | 0.39  |       |      |       |       |       |      |      |       |      |    |      |       |      |       |       |      |       |      | 100   | 116          |
| S9     | 4    | 8        | Mix          | 48.37  |       | 14.79 | 5.56  | 0.33 | 11.64 | 19.32 |       |      |      |       |      |    |      |       |      |       |       |      |       |      | 100   | 98           |
| S9     | 4    | 9        | Ol           | 41.61  |       |       | 7.17  |      | 50.78 |       |       |      |      |       |      |    |      |       | 0.44 |       |       |      |       |      | 100   | 115          |
| S9     | 4    | 10       | ? Ilm +      | 14.17  | 8.82  | 2.49  | 67.61 |      | 1.36  | 5.55  |       |      |      |       |      |    |      |       |      |       |       |      |       |      | 100   | 90           |
| S9     | 4    | 11       | Ads          | 56.84  |       | 26.49 | 0.99  |      |       | 9.52  | 5.77  | 0.40 |      |       |      |    |      |       |      |       |       |      |       |      | 100   | 113          |
| S9     | 4    | 12       | Chl +        | 35.30  | 6.08  | 14.63 | 25.92 | 0.36 | 12.16 | 5.55  |       |      |      |       |      |    |      |       |      |       |       |      |       |      | 100   | 95           |
| S9     | 4    | 13       | Ilm          |        | 52.20 |       | 46.24 | 0.45 | 1.11  |       |       |      |      |       |      |    |      |       |      |       |       |      |       |      | 100   | 91           |
| S9     | 4    | 14       | Chl +        | 41.82  | 0.92  | 12.96 | 19.18 |      | 24.15 | 0.45  | 0.51  |      |      |       |      |    |      |       |      |       |       |      |       |      | 100   | 96           |
| S9     | 4    | 15       | Ol           | 42.20  |       |       | 8.20  |      | 49.29 |       |       |      |      |       |      |    |      |       | 0.31 |       |       |      |       |      | 100   | 123          |
| S9     | 4    | 16       | Ep           | 40.39  |       | 26.83 | 7.31  |      |       | 22.47 |       |      |      |       |      |    |      |       |      |       |       |      |       |      | 97    | 109          |
| S9     | 4    | 17       | Ilm + ?      | 1.25   | 19.46 | 2.95  | 71.40 | 1.11 | 2.73  |       |       |      |      |       |      |    | 1.08 |       |      |       |       |      |       |      | 100   | 101          |
| S9     | 4    | 18       | Chr          |        |       | 15.73 | 19.53 |      | 10.84 |       |       |      |      |       |      |    | 0.36 | 53.53 |      |       |       |      |       |      | 100   | 107          |
| S9     | 4    | 19       | Grt          | 40.00  |       | 20.65 | 25.59 | 3.49 | 0.88  | 9.40  |       |      |      |       |      |    |      |       |      |       |       |      |       |      | 100   | 108          |
| S9     | 4    | 20       | Grt          | 39.98  | 0.32  | 21.14 | 24.71 | 1.24 | 2.70  | 9.92  |       |      |      |       |      |    |      |       |      |       |       |      |       |      | 100   | 118          |
| S9     | 4    | 21       | Mag +        | 2.46   | 0.89  | 1.04  | 95.61 |      |       |       |       |      |      |       |      |    |      |       |      |       |       |      |       |      | 100   | 90           |
| S9     | 4    | 22       | Ttn          | 34.49  | 28.97 | 6.47  | 3.70  |      |       | 26.37 |       |      |      |       |      |    |      |       |      |       |       |      |       |      | 100   | 110          |
| S9     | 4    | 23       | "Ilm"        |        | 67.47 |       | 28.44 |      | 4.09  |       |       |      |      |       |      |    |      |       |      |       |       |      |       |      | 100   | 95           |
| S9     | 4    | 24       | Olig         | 64.86  |       | 21.31 | 0.53  |      |       | 3.35  | 9.19  | 0.76 |      |       |      |    |      |       |      |       |       |      |       |      | 100   | 116          |
| S9     | 4    | 25       | Chr          |        | 0.33  | 31.63 | 17.34 |      | 15.80 |       |       |      |      |       |      |    |      | 34.90 |      |       |       |      |       |      | 100   | 112          |
| S9     | 4    | 26       | Chr          |        |       | 21.88 | 17.24 |      | 12.78 |       |       |      |      |       |      |    |      | 48.09 |      |       |       |      |       |      | 100   | 104          |
| S9     | 4    | 27       | Cpx          | 52.60  | 1.79  | 2.61  | 6.68  |      | 15.14 | 20.70 | 0.49  |      |      |       |      |    |      |       |      |       |       |      |       |      | 100   | 120          |

Table B4.1: EDS analyses of sample S9.

| Sample | Site | Position | Mineral   | SiO2   | TiO2  | Al2O3 | FeO   | MnO  | MgO   | CaO   | Na2O  | K2O  | P2O5  | SO3   | F    | Cl | V2O5 | Cr2O3 | NiO  | ZnO | As2O3 | ZrO2 | Ce2O3 | WO3 | Total | Actual Total |
|--------|------|----------|-----------|--------|-------|-------|-------|------|-------|-------|-------|------|-------|-------|------|----|------|-------|------|-----|-------|------|-------|-----|-------|--------------|
| S9     | 4    | 28       | TiO2      | 0.90   | 89.78 |       | 8.55  |      |       | 0.78  |       |      |       |       |      |    |      |       |      |     |       |      |       |     | 100   | 109          |
| S9     | 4    | 29       | Chr + Spl | 0.62   |       | 37.63 | 21.24 |      | 14.75 |       |       |      |       |       |      |    |      | 25.76 |      |     |       |      |       |     | 100   | 107          |
| S9     | 4    | 30       | Chr +     | 25.98  |       | 5.73  | 18.04 | 0.91 | 4.22  | 25.08 |       |      |       |       |      |    |      | 20.05 |      |     |       |      |       |     | 100   | 96           |
| S9     | 4    | 31       | Qz        | 100.00 |       |       |       |      |       |       |       |      |       |       |      |    |      |       |      |     |       |      |       |     | 100   | 116          |
| S9     | 4    | 32       | Py +      | 24.63  |       | 8.36  | 25.16 |      | 13.71 | 0.37  | 0.64  |      |       | 27.12 |      |    |      |       |      |     |       |      |       |     | 100   | 98           |
| S9     | 4    | 33       | Grt       | 39.63  |       | 21.17 | 32.76 | 2.49 | 2.19  | 1.77  |       |      |       |       |      |    |      |       |      |     |       |      |       |     | 100   | 114          |
| S9     | 4    | 34       | Cpx       | 53.38  | 0.75  | 3.70  | 5.24  |      | 16.78 | 18.99 | 0.31  |      |       |       |      |    |      | 0.87  |      |     |       |      |       |     | 100   | 111          |
| S9     | 4    | 35       | Ol        | 41.96  |       |       | 7.48  |      | 50.23 |       |       |      |       |       |      |    |      |       | 0.33 |     |       |      |       |     | 100   | 114          |
| S9     | 4    | 36       | Ttn       | 33.14  | 36.25 | 1.79  | 0.89  |      |       | 27.93 |       |      |       |       |      |    |      |       |      |     |       |      |       |     | 100   | 107          |
| S9     | 4    | 37       | Mix       | 33.64  | 6.89  | 10.19 | 20.33 |      | 8.86  | 8.24  | 0.73  |      |       | 11.12 |      |    |      |       |      |     |       |      |       |     | 100   | 110          |
| S9     | 4    | 38       | Py +      | 8.10   |       | 2.03  | 26.01 |      | 0.66  |       | 1.60  |      |       | 61.20 |      |    |      |       | 0.41 |     |       |      |       |     | 100   | 188          |
| S9     | 4    | 39       | Qz + Chl  | 92.24  |       | 2.98  | 2.29  |      | 1.88  |       |       | 0.62 |       |       |      |    |      |       |      |     |       |      |       |     | 100   | 122          |
| S9     | 4    | 40       | Qz        | 100.00 |       |       |       |      |       |       |       |      |       |       |      |    |      |       |      |     |       |      |       |     | 100   | 122          |
| S9     | 4    | 41       | Ol        | 41.74  |       |       | 8.53  |      | 49.38 |       |       |      |       |       |      |    |      |       | 0.35 |     |       |      |       |     | 100   | 124          |
| S9     | 5    | 1        | Ol        | 41.89  |       |       | 8.36  |      | 49.47 |       |       |      |       |       |      |    |      |       | 0.28 |     |       |      |       |     | 100   | 112          |
| S9     | 5    | 2        | Opx       | 55.47  |       | 1.06  | 16.32 | 0.39 | 25.21 | 1.54  |       |      |       |       |      |    |      |       |      |     |       |      |       |     | 100   | 112          |
| S9     | 5    | 3        | Cpx       | 50.60  | 2.78  | 4.38  | 8.23  |      | 13.85 | 19.51 | 0.65  |      |       |       |      |    |      |       |      |     |       |      |       |     | 100   | 107          |
| S9     | 5    | 4        | Cpx       | 50.57  | 1.94  | 2.80  | 16.84 | 0.45 | 11.11 | 15.96 | 0.32  |      |       |       |      |    |      |       |      |     |       |      |       |     | 100   | 108          |
| S9     | 5    | 5        | Ads       | 55.04  | 1.69  | 25.02 | 1.72  |      | 0.48  | 10.55 | 5.50  |      |       |       |      |    |      |       |      |     |       |      |       |     | 100   | 111          |
| S9     | 5    | 6        | ?Cpx      | 53.90  | 0.89  | 4.81  | 13.06 | 0.37 | 19.75 | 6.21  | 1.00  |      |       |       |      |    |      |       |      |     |       |      |       |     | 100   | 115          |
| S9     | 5    | 7        | Ol        | 41.98  |       |       | 8.14  |      | 49.48 |       |       |      |       |       |      |    |      |       | 0.40 |     |       |      |       |     | 100   | 115          |
| S9     | 5    | 8        | Ab        | 66.68  |       | 20.35 | 0.53  |      |       | 1.81  | 10.33 | 0.30 |       |       |      |    |      |       |      |     |       |      |       |     | 100   | 114          |
| S9     | 5    | 9        | Cpx?      | 52.01  | 1.46  | 3.59  | 12.04 | 0.38 | 16.31 | 14.21 |       |      |       |       |      |    |      |       |      |     |       |      |       |     | 100   | 112          |
| S9     | 5    | 10       | Grt       | 36.70  |       | 0.52  | 26.96 |      | 1.36  | 34.47 |       |      |       |       |      |    |      |       |      |     |       |      |       |     | 100   | 98           |
| S9     | 5    | 11       | Ttn?      | 35.64  | 22.30 | 7.43  | 11.05 | 0.28 | 6.47  | 16.83 |       |      |       |       |      |    |      |       |      |     |       |      |       |     | 100   | 100          |
| S9     | 5    | 12       | Cpx       | 51.10  | 2.04  | 3.90  | 8.56  |      | 13.49 | 20.51 | 0.40  |      |       |       |      |    |      |       |      |     |       |      |       |     | 100   | 114          |
| S9     | 5    | 13       | Chr       |        |       | 28.30 | 22.72 |      | 13.57 |       |       |      |       |       |      |    |      | 35.41 |      |     |       |      |       |     | 100   | 107          |
| S9     | 5    | 14       | Chr       | 0.73   | 0.86  | 2.99  | 46.55 | 1.57 | 3.77  |       |       |      |       |       |      |    |      | 43.52 |      |     |       |      |       |     | 100   | 99           |
| S9     | 5    | 15       | Chr       |        |       | 9.23  | 20.99 |      | 9.06  |       |       |      |       |       |      |    |      | 60.72 |      |     |       |      |       |     | 100   | 105          |
| S9     | 5    | 16       | Chr       |        |       | 23.81 | 21.22 |      | 11.53 |       |       |      |       |       |      |    |      | 43.45 |      |     |       |      |       |     | 100   | 109          |
| S9     | 5    | 17       | Chr       |        |       | 31.72 | 13.85 |      | 16.52 |       |       |      |       |       |      |    |      | 37.92 |      |     |       |      |       |     | 100   | 105          |
| S9     | 5    | 18       | Chr       |        |       | 3.98  | 20.68 |      | 9.06  |       |       |      |       |       |      |    |      | 66.29 |      |     |       |      |       |     | 100   | 110          |
| S9     | 5    | 19       | Chr       |        |       | 7.41  | 22.89 |      | 8.35  |       |       |      |       |       |      |    | 0.36 | 60.99 |      |     |       |      |       |     | 100   | 113          |
| S9     | 5    | 20       | Opx       | 55.33  |       | 4.65  | 5.69  |      | 33.08 | 0.37  |       |      |       |       |      |    |      | 0.87  |      |     |       |      |       |     | 100   | 116          |
| S9     | 5    | 21       | Ol        | 41.98  |       |       | 7.54  |      | 50.13 |       |       |      |       |       |      |    |      |       | 0.34 |     |       |      |       |     | 100   | 119          |
| S9     | 5    | 22       | Tlc       | 58.77  |       | 1.81  | 2.66  |      | 36.13 |       |       |      |       |       |      |    |      | 0.64  |      |     |       |      |       |     | 100   | 100          |
| S9     | 5    | 23       | Ap        |        |       |       |       |      |       | 48.84 |       |      | 44.72 |       | 6.44 |    |      |       |      |     |       |      |       |     | 100   | 123          |
| S9     | 5    | 24       | Ab        | 68.38  |       | 18.78 | 0.54  |      |       | 0.67  | 11.62 |      |       |       |      |    |      |       |      |     |       |      |       |     | 100   | 119          |
| S9     | 5    | 25       | TiO2      | 4.43   | 84.07 | 1.40  | 8.56  |      | 1.54  |       |       |      |       |       |      |    |      |       |      |     |       |      |       |     | 100   | 103          |
| S9     | 5    | 26       | "Ol"      | 51.18  |       |       | 3.66  |      | 42.98 |       |       |      |       |       | 1.81 |    |      |       | 0.35 |     |       |      |       |     | 100   | 80           |
| S9     | 5    | 27       | ?         | 14.75  |       |       | 66.57 |      | 18.68 |       |       |      |       |       |      |    |      |       |      |     |       |      |       |     | 100   | 104          |

Table B4.1: EDS analyses of sample S9.

| Sample | Site | Position | Mineral  | SiO2  | TiO2 | Al2O3 | FeO   | MnO  | MgO   | CaO   | Na2O  | K2O | P2O5  | SO3   | F    | Cl   | V2O5 | Cr2O3 | NiO   | ZnO  | As2O3 | ZrO2 | Ce2O3 | WO3  | Total | Actual Total |
|--------|------|----------|----------|-------|------|-------|-------|------|-------|-------|-------|-----|-------|-------|------|------|------|-------|-------|------|-------|------|-------|------|-------|--------------|
| S9     | 5    | 28       | Chr      |       |      | 20.21 | 19.01 |      | 12.45 |       |       |     |       |       |      |      |      | 48.32 |       |      |       |      |       |      | 100   | 109          |
| S9     | 5    | 29       | Py       |       |      |       | 28.39 |      |       |       |       |     |       | 71.61 |      |      |      |       |       |      |       |      |       |      | 100   | 241          |
| S9     | 5    | 30       | Tur      | 38.05 | 0.50 | 31.38 | 7.04  |      | 7.03  | 0.43  | 2.38  |     |       |       |      |      |      | 0.20  |       |      |       |      |       |      | 87    | 100          |
| S9     | 5    | 31       | Ap + REE |       |      |       |       |      |       | 45.61 | 1.28  |     | 39.28 | 1.01  | 8.98 |      |      |       |       |      |       |      | 1.52  | 2.32 | 100   | 109          |
| S9     | 5    | 32       | Ol       | 41.89 |      |       | 8.36  |      | 49.33 |       |       |     |       |       |      |      |      |       | 0.41  |      |       |      |       |      | 100   | 123          |
| S9     | 5    | 33       | Ol       | 42.16 |      |       | 6.89  |      | 50.63 |       |       |     |       |       |      |      |      |       | 0.32  |      |       |      |       |      | 100   | 121          |
| S9     | 5    | 34       | Ol       | 42.18 |      |       | 8.73  |      | 49.10 |       |       |     |       |       |      |      |      |       |       |      |       |      |       |      | 100   | 123          |
| S9     | 5    | 35       | Chr +    | 7.01  | 0.57 | 3.72  | 59.39 | 0.80 | 7.81  |       |       |     |       |       |      |      |      | 20.70 |       |      |       |      |       |      | 100   | 106          |
| S9     | 6    | 1        | Chr      |       |      | 11.05 | 17.92 |      | 11.39 |       |       |     |       |       |      |      | 0.39 | 59.26 |       |      |       |      |       |      | 100   | 106          |
| S9     | 6    | 2        | Amph     | 54.49 |      | 4.75  | 4.98  |      | 20.21 | 11.75 | 0.82  |     |       |       |      |      |      |       |       |      |       |      |       |      | 97    | 106          |
| S9     | 6    | 3        | Ab       | 69.32 |      | 18.75 |       |      |       |       | 11.93 |     |       |       |      |      |      |       |       |      |       |      |       |      | 100   | 111          |
| S9     | 6    | 4        | Spl +    | 6.88  | 0.35 | 35.61 | 13.72 |      | 15.92 | 0.40  | 0.67  |     |       | 0.64  | 3.76 |      |      | 22.06 |       |      |       |      |       |      | 100   | 105          |
| S9     | 6    | 5        | Grt?     | 39.17 |      | 19.17 | 7.46  |      | 33.44 | 0.41  | 0.34  |     |       |       |      |      |      |       |       |      |       |      |       |      | 100   | 100          |
| S9     | 6    | 6        | Ol       | 42.16 |      |       | 7.73  |      | 49.82 |       |       |     |       |       |      |      |      |       | 0.29  |      |       |      |       |      | 100   | 114          |
| S9     | 6    | 7        | Ep?      | 43.19 | 0.27 | 19.74 | 10.10 |      | 6.41  | 17.29 |       |     |       |       |      |      |      |       |       |      |       |      |       |      | 97    | 101          |
| S9     | 6    | 8        | Cpx      | 54.15 | 0.43 | 1.14  | 10.75 | 0.48 | 14.39 | 18.65 |       |     |       |       |      |      |      |       |       |      |       |      |       |      | 100   | 111          |
| S9     | 6    | 9        | Mag      |       |      |       | 97.93 |      | 0.82  |       |       |     |       |       |      |      |      | 0.67  | 0.58  |      |       |      |       |      | 100   | 91           |
| S9     | 6    | 10       | "Ol"     | 49.67 |      | 1.56  | 3.54  |      | 44.83 |       |       |     |       |       |      |      |      | 0.40  |       |      |       |      |       |      | 100   | 98           |
| S9     | 6    | 11       | Cpx      | 52.22 | 1.37 | 4.24  | 4.92  |      | 15.46 | 20.61 | 0.39  |     |       |       |      |      |      | 0.79  |       |      |       |      |       |      | 100   | 108          |
| S9     | 6    | 12       | Chr      |       |      | 15.67 | 21.18 |      | 10.49 |       |       |     |       |       |      |      |      | 52.66 |       |      |       |      |       |      | 100   | 102          |
| S9     | 6    | 13       | Ol       | 42.07 |      |       | 7.93  |      | 50.00 |       |       |     |       |       |      |      |      |       |       |      |       |      |       |      | 100   | 111          |
| S9     | 6    | 14       | Ol       | 41.86 |      |       | 6.98  |      | 50.50 |       |       |     |       |       |      |      |      | 0.22  | 0.44  |      |       |      |       |      | 100   | 116          |
| S9     | 6    | 15       | Chr      | 1.25  |      | 10.44 | 19.08 |      | 9.79  |       | 0.74  |     |       |       |      |      | 0.55 | 54.43 |       |      |       |      |       | 3.72 | 100   | 104          |
| S9     | 6    | 16       | Qz       | 99.74 |      |       | 0.26  |      |       |       |       |     |       |       |      |      |      |       |       |      |       |      |       |      | 100   | 122          |
| S9     | 6    | 17       | Chr      |       |      | 8.95  | 27.69 |      | 8.48  |       |       |     |       |       |      |      |      | 54.88 |       |      |       |      |       |      | 100   | 110          |
| S9     | 6    | 18       | Chl      | 27.08 |      | 20.44 | 21.00 |      | 16.24 |       |       |     |       |       |      |      |      | 0.24  |       |      |       |      |       |      | 85    | 103          |
| S9     | 6    | 19       | Pn       | 0.36  |      |       | 30.46 |      |       |       |       |     |       | 44.79 |      |      |      |       | 24.39 |      |       |      |       |      | 100   | 183          |
| S9     | 6    | 20       | Chr +    | 21.76 | 0.68 | 2.83  | 28.54 | 2.05 | 22.56 | 0.60  |       |     |       |       |      | 0.38 |      | 20.10 |       | 0.50 |       |      |       |      | 100   | 100          |
| S9     | 6    | 21       | "Ol"     | 48.96 |      | 2.28  | 3.49  |      | 45.27 |       |       |     |       |       |      |      |      |       |       |      |       |      |       |      | 100   | 105          |
| S9     | 6    | 22       | Chr      |       |      | 18.03 | 20.20 |      | 10.74 |       |       |     |       |       |      |      | 0.43 | 50.61 |       |      |       |      |       |      | 100   | 113          |
| S9     | 6    | 23       | Ol       | 42.06 |      |       | 7.70  |      | 49.93 |       |       |     |       |       |      |      |      |       | 0.30  |      |       |      |       |      | 100   | 123          |
| S9     | 6    | 24       | Ol       | 41.89 |      |       | 8.01  |      | 49.69 |       |       |     |       |       |      |      |      |       | 0.41  |      |       |      |       |      | 100   | 117          |
| S9     | 6    | 25       | Cpx?     | 52.62 | 1.31 | 2.45  | 11.04 | 0.27 | 14.00 | 17.95 | 0.36  |     |       |       |      |      |      |       |       |      |       |      |       |      | 100   | 116          |
| S9     | 6    | 26       | ?Cpx +   | 42.06 |      | 1.69  | 18.03 |      | 16.44 | 21.78 |       |     |       |       |      |      |      |       |       |      |       |      |       |      | 100   | 96           |
| S9     | 6    | 27       | Amph     | 43.66 |      | 1.05  | 12.52 |      | 27.38 | 12.39 |       |     |       |       |      |      |      |       |       |      |       |      |       |      | 97    | 98           |
| S9     | 6    | 28       | Ol       | 41.68 |      |       | 9.83  |      | 48.16 |       |       |     |       |       |      |      |      |       | 0.33  |      |       |      |       |      | 100   | 114          |
| S9     | 6    | 29       | ?Amph    | 48.13 | 3.14 | 8.42  | 15.27 | 0.31 | 9.25  | 9.82  | 2.66  |     |       |       |      |      |      |       |       |      |       |      |       |      | 97    | 114          |
| S9     | 6    | 30       | Chr      |       |      | 12.09 | 18.50 |      | 10.98 |       |       |     |       |       |      |      |      | 58.42 |       |      |       |      |       |      | 100   | 107          |
| S9     | 6    | 31       | Ol       | 41.81 |      |       | 8.47  |      | 49.34 |       |       |     |       |       |      |      |      |       | 0.38  |      |       |      |       |      | 100   | 113          |
| S9     | 6    | 32       | Cpx?     | 52.03 | 0.90 | 3.88  | 9.58  | 0.30 | 15.59 | 17.73 |       |     |       |       |      |      |      |       |       |      |       |      |       |      | 100   | 115          |
| S9     | 6    | 33       | Feohy +  | 11.78 |      | 3.43  | 80.18 |      | 2.36  | 0.61  | 0.52  |     | 1.12  |       |      |      |      |       |       |      |       |      |       |      | 100   | 82           |



Table B4.1: EDS analyses of sample S9.

| Sample | Site | Position | Mineral      | SiO2  | TiO2  | Al2O3 | FeO   | MnO  | MgO   | CaO   | Na2O | K2O   | P2O5 | SO3 | F    | Cl   | V2O5 | Cr2O3 | NiO  | ZnO  | As2O3 | ZrO2  | Ce2O3 | WO3 | Total | Actual Total |
|--------|------|----------|--------------|-------|-------|-------|-------|------|-------|-------|------|-------|------|-----|------|------|------|-------|------|------|-------|-------|-------|-----|-------|--------------|
| S9     | 6    | 34       | Qz +         | 90.95 |       | 4.40  | 1.21  |      | 0.47  | 0.24  |      | 2.74  |      |     |      |      |      |       |      |      |       |       |       |     | 100   | 118          |
| S9     | 6    | 35       | Ilm          |       | 43.91 |       | 53.54 | 1.38 | 1.17  |       |      |       |      |     |      |      |      |       |      |      |       |       |       |     | 100   | 101          |
| S9     | 7    | 1        | Chr          |       |       | 10.78 | 21.52 |      | 9.03  |       |      |       |      |     |      |      | 0.39 | 58.27 |      |      |       |       |       |     | 100   | 99           |
| S9     | 7    | 2        | Chl          | 29.65 |       | 18.34 | 21.09 |      | 15.36 |       |      | 0.56  |      |     |      |      |      |       |      |      |       |       |       |     | 85    | 89           |
| S9     | 7    | 3        | Ttn          | 33.51 | 29.89 | 3.84  | 2.98  |      | 1.80  | 24.47 |      |       |      |     | 2.78 |      | 0.72 |       |      |      |       |       |       |     | 100   | 107          |
| S9     | 7    | 4        | Chl          | 32.88 | 0.27  | 13.02 | 20.87 | 0.26 | 17.16 | 0.54  |      |       |      |     |      |      |      |       |      |      |       |       |       |     | 85    | 93           |
| S9     | 7    | 5        | Ads          | 58.32 |       | 24.39 | 2.13  |      | 0.70  | 7.14  | 7.05 | 0.28  |      |     |      |      |      |       |      |      |       |       |       |     | 100   | 109          |
| S9     | 7    | 6        | Ol           | 40.51 |       |       | 14.22 | 0.81 | 44.02 |       |      |       |      |     |      |      |      |       | 0.43 |      |       |       |       |     | 100   | 91           |
| S9     | 7    | 7        | Ol           | 39.48 |       | 13.41 | 6.45  | 0.61 | 37.17 |       |      |       |      |     | 1.51 |      |      | 0.98  | 0.39 |      |       |       |       |     | 100   | 97           |
| S9     | 7    | 8        | Ol           | 42.07 |       |       | 8.28  |      | 49.37 |       |      |       |      |     |      |      |      |       | 0.28 |      |       |       |       |     | 100   | 113          |
| S9     | 7    | 9        | Cpx          | 49.57 | 3.21  | 5.16  | 7.32  |      | 13.26 | 20.87 | 0.61 |       |      |     |      |      |      |       |      |      |       |       |       |     | 100   | 110          |
| S9     | 7    | 10       | Ads + TiO2 + | 56.02 | 9.40  | 9.73  | 9.46  |      | 1.00  | 8.34  | 6.05 |       |      |     |      |      |      |       |      |      |       |       |       |     | 100   | 118          |
| S9     | 7    | 11       | Feohy +      | 6.48  | 0.36  | 1.27  | 88.96 | 0.46 | 1.34  | 0.64  | 0.49 |       |      |     |      |      |      |       |      |      |       |       |       |     | 100   | 77           |
| S9     | 7    | 12       | Feohy +      | 8.14  | 1.31  | 3.38  | 81.84 |      | 3.68  | 0.53  | 0.48 | 0.32  |      |     |      |      | 0.32 |       |      |      |       |       |       |     | 100   | 90           |
| S9     | 7    | 13       | Lab          | 60.58 |       | 23.21 | 2.21  |      | 1.99  | 10.12 | 0.48 | 1.42  |      |     |      |      |      |       |      |      |       |       |       |     | 100   | 105          |
| S9     | 7    | 14       | Lab          | 63.54 |       | 23.10 |       |      |       | 11.17 |      | 2.19  |      |     |      |      |      |       |      |      |       |       |       |     | 100   | 103          |
| S9     | 7    | 15       | Chl          | 26.60 | 0.56  | 17.02 | 31.34 | 0.55 | 8.93  |       |      |       |      |     |      |      |      |       |      |      |       |       |       |     | 85    | 102          |
| S9     | 7    | 16       | Amph (Ged)   | 42.89 |       | 13.57 | 14.24 |      | 24.69 | 1.02  | 0.41 | 0.18  |      |     |      |      |      |       |      |      |       |       |       |     | 97    | 100          |
| S9     | 7    | 17       | Dol          |       |       |       |       |      | 23.52 | 30.48 |      |       |      |     |      |      |      |       |      |      |       |       |       |     | 54    | 55           |
| S9     | 7    | 18       | "Ol"         | 48.59 |       |       | 8.00  |      | 42.94 | 0.48  |      |       |      |     |      |      |      |       |      |      |       |       |       |     | 100   | 88           |
| S9     | 7    | 19       | ?Opx         | 55.97 |       |       | 8.62  |      | 34.63 | 0.47  |      |       |      |     |      |      |      |       | 0.31 |      |       |       |       |     | 100   | 95           |
| S9     | 7    | 20       | Chr          |       |       | 11.35 | 21.00 |      | 10.39 |       |      |       |      |     |      |      |      | 57.26 |      |      |       |       |       |     | 100   | 109          |
| S9     | 7    | 21       | TiO2         |       | 99.62 |       | 0.38  |      |       |       |      |       |      |     |      |      |      |       |      |      |       |       |       |     | 100   | 110          |
| S9     | 7    | 22       | Chr          |       |       | 15.55 | 17.31 |      | 12.24 |       |      |       |      |     |      |      |      | 54.90 |      |      |       |       |       |     | 100   | 107          |
| S9     | 8    | 1        | Chr          |       |       | 7.91  | 16.98 |      | 13.55 |       |      |       |      |     |      |      |      | 61.57 |      |      |       |       |       |     | 100   | 104          |
| S9     | 8    | 2        | Zrn          | 30.94 |       |       |       |      |       |       |      |       |      |     |      |      |      |       |      |      |       | 69.06 |       |     | 100   | 114          |
| S9     | 8    | 3        | Ol           | 41.72 |       |       | 8.31  | 0.23 | 49.40 |       |      |       |      |     |      |      |      |       | 0.34 |      |       |       |       |     | 100   | 114          |
| S9     | 8    | 4        | Ms           | 51.00 | 0.35  | 25.11 | 4.42  |      | 3.09  |       | 0.33 | 10.69 |      |     |      |      |      |       |      |      |       |       |       |     | 95    | 103          |
| S9     | 8    | 5        | Chl          | 29.00 |       | 19.19 | 21.19 | 1.84 | 13.77 |       |      |       |      |     |      |      |      |       |      |      |       |       |       |     | 85    | 100          |
| S9     | 8    | 6        | Cpx          | 51.76 | 1.63  | 3.13  | 10.65 | 0.26 | 12.53 | 19.51 | 0.53 |       |      |     |      |      |      |       |      |      |       |       |       |     | 100   | 115          |
| S9     | 8    | 7        | Ol           | 42.09 |       |       | 8.66  |      | 48.89 |       |      |       |      |     |      |      |      |       | 0.37 |      |       |       |       |     | 100   | 122          |
| S9     | 8    | 8        | Zrn          | 30.60 |       |       |       |      |       |       |      |       |      |     |      |      |      |       |      |      |       | 69.40 |       |     | 100   | 119          |
| S9     | 8    | 9        | Chr          |       |       | 17.13 | 22.10 |      | 9.99  |       |      |       |      |     |      |      |      | 50.27 |      | 0.49 |       |       |       |     | 100   | 111          |
| S9     | 8    | 10       | Chr          |       |       | 0.62  | 39.88 | 0.91 | 3.28  |       |      |       |      |     |      |      |      | 55.32 |      |      |       |       |       |     | 100   | 107          |
| S9     | 8    | 11       | Chr          |       |       | 13.85 | 23.86 |      | 10.06 |       |      |       |      |     |      |      |      | 52.23 |      |      |       |       |       |     | 100   | 108          |
| S9     | 8    | 12       | Grt          | 41.22 | 0.50  | 14.58 | 8.85  | 0.31 | 0.31  | 34.23 |      |       |      |     |      |      |      |       |      |      |       |       |       |     | 100   | 113          |
| S9     | 8    | 13       | Grt          | 40.39 |       | 20.70 | 28.58 | 0.55 | 4.03  | 5.75  |      |       |      |     |      |      |      |       |      |      |       |       |       |     | 100   | 107          |
| S9     | 8    | 14       | Ads + Chl    | 55.76 | 0.67  | 16.71 | 7.20  |      | 6.33  | 8.75  | 4.58 |       |      |     |      |      |      |       |      |      |       |       |       |     | 100   | 102          |
| S9     | 8    | 15       | Ol           | 41.93 |       |       | 7.50  |      | 50.27 |       |      |       |      |     |      |      |      |       | 0.30 |      |       |       |       |     | 100   | 110          |
| S9     | 9    | 1        | Chr          |       |       | 19.28 | 21.13 |      | 12.33 |       |      |       |      |     |      |      |      | 47.25 |      |      |       |       |       |     | 100   | 109          |
| S9     | 9    | 2        | ?            | 46.32 |       | 11.88 | 4.67  |      | 34.62 | 0.53  | 0.45 |       |      |     |      | 0.20 |      | 1.33  |      |      |       |       |       |     | 100   | 93           |

Table B4.1: EDS analyses of sample S9.

| Sample | Site | Position | Mineral | SiO2   | TiO2 | Al2O3 | FeO   | MnO  | MgO   | CaO   | Na2O  | K2O   | P2O5  | SO3 | F    | Cl | V2O5 | Cr2O3 | NiO  | ZnO  | As2O3 | ZrO2 | Ce2O3 | WO3 | Total | Actual Total |
|--------|------|----------|---------|--------|------|-------|-------|------|-------|-------|-------|-------|-------|-----|------|----|------|-------|------|------|-------|------|-------|-----|-------|--------------|
| S9     | 9    | 3        | Qz      | 100.00 |      |       |       |      |       |       |       |       |       |     |      |    |      |       |      |      |       |      |       |     | 100   | 118          |
| S9     | 9    | 4        | Ms +    | 50.04  | 0.50 | 25.20 | 6.24  |      | 2.00  |       | 0.27  | 10.75 |       |     |      |    |      |       |      |      |       |      |       |     | 95    | 107          |
| S9     | 9    | 5        | Tur     | 38.58  | 0.32 | 34.67 | 6.08  |      | 5.20  | 0.37  | 1.78  |       |       |     |      |    |      |       |      |      |       |      |       |     | 87    | 101          |
| S9     | 9    | 6        | Spl     |        |      | 41.27 | 12.57 |      | 17.78 |       |       |       |       |     |      |    |      | 28.38 |      |      |       |      |       |     | 100   | 112          |
| S9     | 9    | 7        | Ol      | 41.69  |      |       | 8.82  |      | 49.06 |       |       |       |       |     |      |    |      |       | 0.43 |      |       |      |       |     | 100   | 122          |
| S9     | 9    | 8        | Amph    | 43.21  | 1.84 | 10.72 | 18.12 | 0.27 | 12.11 | 10.22 | 0.50  |       |       |     |      |    |      |       |      |      |       |      |       |     | 97    | 114          |
| S9     | 9    | 9        | Chr     |        |      | 12.98 | 18.61 |      | 11.44 |       |       |       |       |     |      |    | 0.41 | 56.56 |      |      |       |      |       |     | 100   | 110          |
| S9     | 9    | 10       | ?Grt    | 39.80  |      | 20.93 | 20.66 | 7.73 | 0.58  | 10.30 |       |       |       |     |      |    |      |       |      |      |       |      |       |     | 100   | 112          |
| S9     | 9    | 11       | Ol      | 41.98  |      |       | 8.27  |      | 49.43 |       |       |       |       |     |      |    |      |       | 0.32 |      |       |      |       |     | 100   | 116          |
| S9     | 9    | 12       | Ap      |        |      |       |       |      |       | 48.63 |       |       | 44.74 |     | 6.63 |    |      |       |      |      |       |      |       |     | 100   | 125          |
| S9     | 9    | 13       | Dol     |        |      |       |       |      | 22.40 | 31.60 |       |       |       |     |      |    |      |       |      |      |       |      |       |     | 54    | 52           |
| S9     | 9    | 14       | Amph    | 43.86  | 2.91 | 9.46  | 18.43 | 0.32 | 9.94  | 11.51 | 0.56  |       |       |     |      |    |      |       |      |      |       |      |       |     | 97    | 102          |
| S9     | 9    | 15       | Ol      | 42.02  |      |       | 7.28  |      | 50.37 |       |       |       |       |     |      |    |      |       | 0.32 |      |       |      |       |     | 100   | 115          |
| S9     | 9    | 16       | Ol      | 41.98  |      |       | 8.15  |      | 49.42 |       |       |       |       |     |      |    |      |       | 0.45 |      |       |      |       |     | 100   | 118          |
| S9     | 9    | 17       | Cpx?    | 52.68  | 1.09 | 2.69  | 14.37 | 0.27 | 15.76 | 13.15 |       |       |       |     |      |    |      |       |      |      |       |      |       |     | 100   | 112          |
| S9     | 9    | 18       | Olig    | 60.58  |      | 24.89 | 1.36  |      | 0.29  | 4.76  | 6.59  | 1.52  |       |     |      |    |      |       |      |      |       |      |       |     | 100   | 112          |
| S9     | 9    | 19       | Feohy + | 25.60  | 9.11 | 6.81  | 46.21 | 0.36 | 0.62  | 6.85  | 4.44  |       |       |     |      |    |      |       |      |      |       |      |       |     | 100   | 107          |
| S9     | 9    | 20       | Ol      | 42.03  |      |       | 7.53  |      | 50.44 |       |       |       |       |     |      |    |      |       |      |      |       |      |       |     | 100   | 117          |
| S9     | 9    | 21       | Cpx     | 52.43  | 1.50 | 3.37  | 7.61  |      | 14.79 | 19.93 | 0.36  |       |       |     |      |    |      |       |      |      |       |      |       |     | 100   | 116          |
| S9     | 9    | 22       | Chl     | 25.42  |      | 20.02 | 22.81 | 0.27 | 13.64 |       | 0.43  |       |       |     | 2.41 |    |      |       |      |      |       |      |       |     | 85    | 101          |
| S9     | 9    | 23       | Cpx     | 54.39  |      | 3.04  | 1.93  |      | 17.67 | 22.11 |       |       |       |     |      |    |      | 0.85  |      |      |       |      |       |     | 100   | 118          |
| S9     | 10   | 1        | Chr     |        |      | 9.87  | 21.67 |      | 8.94  |       |       |       |       |     |      |    | 0.46 | 59.05 |      |      |       |      |       |     | 100   | 101          |
| S9     | 10   | 2        | Ol      | 41.60  |      |       | 8.26  |      | 49.77 |       |       |       |       |     |      |    |      |       | 0.37 |      |       |      |       |     | 100   | 117          |
| S9     | 10   | 3        | Cpx     | 48.23  | 3.42 | 6.83  | 6.99  |      | 13.00 | 20.21 | 0.62  |       |       |     |      |    |      | 0.70  |      |      |       |      |       |     | 100   | 114          |
| S9     | 10   | 4        | Grt     | 40.04  |      | 21.07 | 28.43 | 1.77 | 3.71  | 4.98  |       |       |       |     |      |    |      |       |      |      |       |      |       |     | 100   | 117          |
| S9     | 10   | 5        | Qz      | 100.00 |      |       |       |      |       |       |       |       |       |     |      |    |      |       |      |      |       |      |       |     | 100   | 119          |
| S9     | 10   | 6        | Qz +    | 94.26  |      | 4.14  | 0.31  |      | 0.27  |       | 0.38  | 0.64  |       |     |      |    |      |       |      |      |       |      |       |     | 100   | 113          |
| S9     | 10   | 7        | Spl     |        |      | 27.36 | 20.62 |      | 13.18 |       |       |       |       |     |      |    |      | 38.84 |      |      |       |      |       |     | 100   | 105          |
| S9     | 10   | 8        | Chr     |        | 0.65 | 23.23 | 25.00 |      | 11.38 |       |       |       |       |     |      |    |      | 39.74 |      |      |       |      |       |     | 100   | 104          |
| S9     | 10   | 9        | Chr     |        |      | 19.91 | 17.63 |      | 12.65 |       |       |       |       |     |      |    |      | 49.81 |      |      |       |      |       |     | 100   | 104          |
| S9     | 11   | 1        | Chr     |        |      | 18.42 | 29.26 |      | 9.36  |       |       |       |       |     |      |    | 0.51 | 42.45 |      |      |       |      |       |     | 100   | 108          |
| S9     | 11   | 2        | Chr     |        |      | 1.24  | 54.92 | 4.69 | 1.66  |       |       |       |       |     |      |    |      | 36.76 |      | 0.73 |       |      |       |     | 100   | 103          |
| S9     | 11   | 3        | Opx     | 56.50  |      | 3.27  | 5.67  |      | 33.59 | 0.38  |       |       |       |     |      |    |      | 0.59  |      |      |       |      |       |     | 100   | 113          |
| S9     | 11   | 4        | Opx     | 51.42  | 0.59 | 3.92  | 19.83 | 0.37 | 18.09 | 5.40  | 0.38  |       |       |     |      |    |      |       |      |      |       |      |       |     | 100   | 111          |
| S9     | 11   | 5        | Lab     | 55.82  |      | 27.18 | 0.97  |      |       | 11.18 | 4.85  |       |       |     |      |    |      |       |      |      |       |      |       |     | 100   | 113          |
| S9     | 11   | 6        | Cpx     | 54.44  |      | 3.05  | 2.08  |      | 17.48 | 22.11 |       |       |       |     |      |    |      | 0.83  |      |      |       |      |       |     | 100   | 115          |
| S9     | 11   | 7        | Spl     |        |      | 46.10 | 13.62 |      | 18.35 |       |       |       |       |     |      |    |      | 21.93 |      |      |       |      |       |     | 100   | 112          |
| S9     | 11   | 8        | Cpx     | 51.95  | 1.14 | 3.08  | 10.60 | 0.37 | 14.41 | 18.01 | 0.45  |       |       |     |      |    |      |       |      |      |       |      |       |     | 100   | 109          |
| S9     | 11   | 9        | Chl +   | 29.97  | 0.69 | 14.19 | 29.46 | 0.28 | 8.74  | 1.28  | 0.39  |       |       |     |      |    |      |       |      |      |       |      |       |     | 85    | 93           |
| S9     | 11   | 10       | Ab      | 68.65  |      | 19.16 |       |      |       | 0.72  | 11.46 |       |       |     |      |    |      |       |      |      |       |      |       |     | 100   | 115          |
| S9     | 11   | 11       | Dol     |        |      |       |       |      | 22.53 | 30.43 |       |       |       |     | 1.03 |    |      |       |      |      |       |      |       |     | 54    | 54           |

Table B4.1: EDS analyses of sample S9.

| Sample | Site | Position | Mineral    | SiO2  | TiO2  | Al2O3 | FeO   | MnO  | MgO   | CaO   | Na2O | K2O  | P2O5 | SO3 | F    | Cl   | V2O5 | Cr2O3 | NiO  | ZnO | As2O3 | ZrO2  | Ce2O3 | WO3 | Total | Actual Total |
|--------|------|----------|------------|-------|-------|-------|-------|------|-------|-------|------|------|------|-----|------|------|------|-------|------|-----|-------|-------|-------|-----|-------|--------------|
| S9     | 11   | 12       | Ol         | 42.11 |       |       | 7.30  |      | 50.23 |       |      |      |      |     |      |      |      |       | 0.35 |     |       |       |       |     | 100   | 119          |
| S9     | 11   | 13       | Ol         | 42.64 |       |       | 9.65  |      | 47.29 |       |      |      |      |     |      |      |      |       | 0.42 |     |       |       |       |     | 100   | 100          |
| S9     | 11   | 14       | Mix        | 26.08 | 9.81  | 12.08 | 35.36 | 0.43 | 15.11 | 0.51  |      | 0.62 |      |     |      |      |      |       |      |     |       |       |       |     | 100   | 104          |
| S9     | 11   | 15       | Chr        |       | 0.54  | 3.42  | 39.45 | 0.99 | 2.60  |       |      |      |      |     |      |      | 0.45 | 52.55 |      |     |       |       |       |     | 100   | 102          |
| S9     | 11   | 16       | "Ol"       | 49.56 |       |       | 4.86  |      | 42.67 |       |      |      |      |     | 1.94 |      |      |       | 0.97 |     |       |       |       |     | 100   | 73           |
| S9     | 11   | 17       | Chr        |       |       | 7.28  | 24.44 |      | 7.91  |       |      |      |      |     |      |      |      | 60.37 |      |     |       |       |       |     | 100   | 106          |
| S9     | 11   | 18       | Amph       | 54.38 | 0.48  | 2.66  | 13.17 | 0.33 | 14.75 | 10.39 | 0.84 |      |      |     |      |      |      |       |      |     |       |       |       |     | 97    | 108          |
| S9     | 11   | 19       | Chl ?      | 33.26 |       | 17.84 | 28.10 | 4.38 | 0.99  | 0.42  |      |      |      |     |      |      |      |       |      |     |       |       |       |     | 85    | 106          |
| S9     | 11   | 20       | Feld?      | 54.65 |       | 30.12 | 0.92  |      |       | 5.59  | 3.13 | 4.24 |      |     | 1.35 |      |      |       |      |     |       |       |       |     | 100   | 113          |
| S9     | 11   | 21       | Opx        | 48.03 | 6.37  | 5.08  | 16.89 | 0.27 | 13.52 | 9.52  | 0.32 |      |      |     |      |      |      |       |      |     |       |       |       |     | 100   | 111          |
| S9     | 11   | 22       | Fe-oxide + | 16.49 | 13.84 | 2.92  | 55.37 |      | 1.49  | 9.18  |      |      |      |     |      |      | 0.70 |       |      |     |       |       |       |     | 100   | 100          |
| S9     | 11   | 23       | Ol         | 42.08 |       |       | 6.70  | 0.20 | 50.63 |       |      |      |      |     |      |      |      |       | 0.39 |     |       |       |       |     | 100   | 115          |
| S9     | 11   | 24       | Amph       | 44.31 | 3.93  | 10.49 | 10.62 |      | 14.16 | 10.64 | 2.64 | 0.21 |      |     |      |      |      |       |      |     |       |       |       |     | 97    | 107          |
| S9     | 12   | 1        | Feohy +    |       | 12.98 | 3.08  | 80.56 | 0.48 | 2.91  |       |      |      |      |     |      |      |      |       |      |     |       |       |       |     | 100   | 95           |
| S9     | 12   | 2        | Chr        |       |       | 6.42  | 26.94 |      | 7.96  |       |      |      |      |     |      |      |      | 58.68 |      |     |       |       |       |     | 100   | 105          |
| S9     | 12   | 3        | Chr        |       |       | 6.51  | 27.06 |      | 8.51  |       |      |      |      |     |      |      |      | 57.92 |      |     |       |       |       |     | 100   | 106          |
| S9     | 12   | 4        | Ol +       | 46.04 |       |       | 7.69  |      | 42.78 |       |      |      |      |     | 1.98 | 0.17 |      | 0.42  |      |     |       |       | 0.93  |     | 100   | 98           |
| S9     | 12   | 5        | Ol         | 41.94 |       |       | 7.76  |      | 49.94 |       |      |      |      |     |      |      |      |       | 0.35 |     |       |       |       |     | 100   | 116          |
| S9     | 12   | 6        | Ol         | 42.18 |       |       | 8.37  |      | 49.15 |       |      |      |      |     |      |      |      |       | 0.29 |     |       |       |       |     | 100   | 118          |
| S9     | 12   | 7        | ?          | 38.77 |       | 20.06 | 2.93  |      | 37.92 |       |      |      |      |     |      |      |      | 0.32  |      |     |       |       |       |     | 100   | 99           |
| S9     | 12   | 8        | Dol        | 0.37  |       |       |       |      | 20.78 | 30.93 |      |      |      |     | 1.92 |      |      |       |      |     |       |       |       |     | 54    | 57           |
| S9     | 12   | 9        | Ol         | 43.06 |       |       | 9.20  | 0.21 | 47.53 |       |      |      |      |     |      |      |      |       |      |     |       |       |       |     | 100   | 124          |
| S9     | 12   | 10       | Grt        | 39.24 |       | 20.64 | 27.65 | 5.26 | 1.57  | 5.63  |      |      |      |     |      |      |      |       |      |     |       |       |       |     | 100   | 116          |
| S9     | 12   | 11       | Qz         | 99.80 |       |       | 0.20  |      |       |       |      |      |      |     |      |      |      |       |      |     |       |       |       |     | 100   | 127          |
| S9     | 12   | 12       | Chr        |       |       | 18.99 | 16.58 |      | 13.02 |       |      |      |      |     |      |      |      | 51.40 |      |     |       |       |       |     | 100   | 114          |
| S9     | 12   | 13       | Chr        |       | 0.35  | 10.74 | 35.61 | 0.92 | 5.20  |       |      |      |      |     |      |      |      | 47.20 |      |     |       |       |       |     | 100   | 110          |
| S9     | 12   | 14       | Dol        |       |       |       |       |      | 22.72 | 31.28 |      |      |      |     |      |      |      |       |      |     |       |       |       |     | 54    | 58           |
| S9     | 12   | 15       | Zrn        | 31.18 |       |       |       |      |       |       |      |      |      |     |      |      |      |       |      |     |       | 68.82 |       |     | 100   | 117          |
| S9     | 12   | 16       | Chr        |       |       | 7.88  | 20.77 |      | 8.99  |       |      |      |      |     |      |      | 0.41 | 61.95 |      |     |       |       |       |     | 100   | 104          |
| S9     | 12   | 17       | Chr        |       |       | 22.62 | 17.46 |      | 14.51 |       |      |      |      |     |      |      |      | 45.41 |      |     |       |       |       |     | 100   | 109          |
| S9     | 12   | 18       | Opx        | 56.64 |       | 3.12  | 5.12  |      | 33.93 | 0.57  |      |      |      |     |      |      |      | 0.62  |      |     |       |       |       |     | 100   | 111          |
| S9     | 12   | 19       | Opx        | 55.89 |       | 3.76  | 5.52  |      | 33.60 | 0.46  |      |      |      |     |      |      |      | 0.76  |      |     |       |       |       |     | 100   | 112          |
| S9     | 12   | 20       | "Ilm"      |       | 82.07 |       | 17.93 |      |       |       |      |      |      |     |      |      |      |       |      |     |       |       |       |     | 100   | 95           |
| S9     | 12   | 21       | Serp +     | 41.85 | 0.43  | 12.80 | 4.54  |      | 34.50 | 3.85  |      |      |      |     | 2.03 |      |      |       |      |     |       |       |       |     | 100   | 99           |
| S9     | 12   | 22       | Amph       | 43.17 | 3.72  | 12.65 | 9.40  | 0.24 | 13.36 | 10.84 | 3.08 | 0.53 |      |     |      |      |      |       |      |     |       |       |       |     | 97    | 107          |
| S9     | 12   | 23       | Cpx        | 53.80 | 0.54  | 1.50  | 9.91  | 0.41 | 14.53 | 19.04 | 0.27 |      |      |     |      |      |      |       |      |     |       |       |       |     | 100   | 117          |
| S9     | 12   | 24       | Opx        | 58.39 |       | 1.09  | 6.19  |      | 34.02 | 0.31  |      |      |      |     |      |      |      |       |      |     |       |       |       |     | 100   | 109          |
| S9     | 12   | 25       | Mix        | 20.44 | 34.04 | 4.58  | 24.85 | 3.68 | 9.77  | 1.64  | 1.01 |      |      |     |      |      |      |       |      |     |       |       |       |     | 100   | 104          |
| S9     | 12   | 26       | Cpx        | 54.31 | 0.75  | 1.34  | 8.70  | 0.26 | 13.78 | 20.35 | 0.50 |      |      |     |      |      |      |       |      |     |       |       |       |     | 100   | 117          |
| S9     | 12   | 27       | Chl        | 29.36 |       | 8.87  | 28.90 |      | 15.60 | 1.01  | 0.98 |      |      |     |      |      |      | 0.28  |      |     |       |       |       |     | 85    | 95           |
| S9     | 12   | 28       | Fe-oxide + | 11.66 |       | 3.49  | 80.10 |      | 2.45  | 0.96  | 0.80 |      |      |     |      |      |      | 0.54  |      |     |       |       |       |     | 100   | 88           |

Table B4.1: EDS analyses of sample S9.

| Sample | Site | Position | Mineral | SiO2  | TiO2  | Al2O3 | FeO   | MnO  | MgO   | CaO   | Na2O | K2O  | P2O5  | SO3 | F    | Cl   | V2O5 | Cr2O3 | NiO  | ZnO | As2O3 | ZrO2  | Ce2O3 | WO3 | Total | Actual Total |
|--------|------|----------|---------|-------|-------|-------|-------|------|-------|-------|------|------|-------|-----|------|------|------|-------|------|-----|-------|-------|-------|-----|-------|--------------|
| S9     | 12   | 29       | "Ilm" + | 19.15 | 45.58 | 3.38  | 11.77 | 2.79 | 1.16  | 16.16 |      |      |       |     |      |      |      |       |      |     |       |       |       |     | 100   | 111          |
| S9     | 12   | 30       | Amph    | 45.72 | 2.13  | 10.29 | 12.98 | 0.29 | 12.58 | 10.65 | 2.36 |      |       |     |      |      |      |       |      |     |       |       |       |     | 97    | 118          |
| S9     | 12   | 31       | Dol     |       |       |       |       |      | 22.67 | 31.33 |      |      |       |     |      |      |      |       |      |     |       |       |       |     | 54    | 59           |
| S9     | 12   | 32       | Grt     | 40.01 |       | 21.00 | 29.99 | 0.72 | 3.01  | 5.28  |      |      |       |     |      |      |      |       |      |     |       |       |       |     | 100   | 113          |
| S9     | 12   | 33       | Cpx     | 54.87 |       | 1.65  | 7.48  | 0.35 | 15.00 | 20.20 | 0.46 |      |       |     |      |      |      |       |      |     |       |       |       |     | 100   | 116          |
| S9     | 12   | 34       | Ap      | 0.50  |       |       | 0.25  |      |       | 49.66 | 0.32 |      | 44.73 |     | 4.06 | 0.48 |      |       |      |     |       |       |       |     | 100   | 111          |
| S9     | 12   | 35       | Cpx     | 54.32 |       | 3.07  | 1.98  |      | 17.44 | 22.58 |      |      |       |     |      |      |      | 0.61  |      |     |       |       |       |     | 100   | 119          |
| S9     | 12   | 36       | Ol      | 41.38 | 0.35  | 0.86  | 9.45  |      | 42.67 | 0.44  |      |      |       |     | 4.85 |      |      |       |      |     |       |       |       |     | 100   | 86           |
| S9     | 12   | 37       | Ilm     |       | 58.81 |       | 39.45 | 0.77 | 0.96  |       |      |      |       |     |      |      |      |       |      |     |       |       |       |     | 100   | 65           |
| S9     | 12   | 38       | Ol      | 42.07 |       |       | 7.59  |      | 49.97 |       |      |      |       |     |      |      |      |       | 0.37 |     |       |       |       |     | 100   | 117          |
| S9     | 13   | 1        | "Mag"   | 4.29  |       |       | 92.64 |      |       | 0.34  |      |      | 0.77  |     |      |      |      |       | 0.75 |     | 1.21  |       |       |     | 100   | 85           |
| S9     | 13   | 2        | Chr     |       |       | 11.09 | 20.87 |      | 10.35 |       |      |      |       |     |      |      | 0.41 | 57.27 |      |     |       |       |       |     | 100   | 111          |
| S9     | 13   | 3        | Grt     | 39.54 |       | 20.82 | 31.95 | 2.66 | 3.51  | 1.52  |      |      |       |     |      |      |      |       |      |     |       |       |       |     | 100   | 114          |
| S9     | 13   | 4        | Chr     |       |       | 22.42 | 17.59 |      | 13.32 |       |      |      |       |     |      |      |      | 46.67 |      |     |       |       |       |     | 100   | 109          |
| S9     | 13   | 5        | Spl     |       |       | 38.53 | 14.73 |      | 16.79 |       |      |      |       |     |      |      |      | 29.96 |      |     |       |       |       |     | 100   | 109          |
| S9     | 13   | 6        | Dol     |       |       |       |       |      | 22.71 | 31.29 |      |      |       |     |      |      |      |       |      |     |       |       |       |     | 54    | 57           |
| S9     | 13   | 7        | Ol      | 42.02 |       |       | 7.24  |      | 50.32 |       |      |      |       |     |      |      |      |       | 0.42 |     |       |       |       |     | 100   | 114          |
| S9     | 13   | 8        | Spl     |       | 0.42  | 36.28 | 17.94 |      | 15.38 |       |      |      |       |     |      |      |      | 29.98 |      |     |       |       |       |     | 100   | 107          |
| S9     | 13   | 9        | Chr     |       | 0.82  | 20.96 | 24.69 |      | 14.86 |       |      |      |       |     |      |      | 0.43 | 38.23 |      |     |       |       |       |     | 100   | 101          |
| S9     | 13   | 10       | Ep      | 40.20 |       | 25.43 | 8.90  |      |       | 22.47 |      |      |       |     |      |      |      |       |      |     |       |       |       |     | 97    | 105          |
| S9     | 13   | 11       | Ol      | 41.87 |       |       | 8.70  |      | 49.06 |       |      |      |       |     |      |      |      |       | 0.37 |     |       |       |       |     | 100   | 114          |
| S9     | 13   | 12       | Spl     |       |       | 48.06 | 15.71 |      | 17.92 |       |      |      |       |     |      |      |      | 18.31 |      |     |       |       |       |     | 100   | 106          |
| S9     | 13   | 13       | Cpx     | 54.58 | 0.31  | 1.13  | 8.81  | 0.24 | 15.00 | 19.66 | 0.27 |      |       |     |      |      |      |       |      |     |       |       |       |     | 100   | 113          |
| S9     | 13   | 14       | Chl     | 24.57 |       | 20.74 | 32.50 | 0.27 | 6.93  |       |      |      |       |     |      |      |      |       |      |     |       |       |       |     | 85    | 101          |
| S9     | 13   | 15       | "Ilm" + | 12.01 | 23.47 | 2.01  | 51.94 | 0.72 |       | 8.90  |      |      |       |     |      |      | 0.95 |       |      |     |       |       |       |     | 100   | 104          |
| S9     | 13   | 16       | Olig +  | 60.15 |       | 23.94 | 1.96  |      | 0.50  | 4.99  | 7.22 | 1.25 |       |     |      |      |      |       |      |     |       |       |       |     | 100   | 112          |
| S9     | 13   | 17       | Ttn + ? | 25.19 | 19.59 | 3.13  | 34.15 | 0.36 | 0.61  | 16.97 |      |      |       |     |      |      |      |       |      |     |       |       |       |     | 100   | 100          |
| S9     | 13   | 18       | Ads     | 60.65 |       | 23.84 | 0.85  |      |       | 6.86  | 7.79 |      |       |     |      |      |      |       |      |     |       |       |       |     | 100   | 113          |
| S9     | 13   | 19       | Mix     | 39.40 | 0.67  | 14.23 | 25.21 | 0.44 | 14.95 | 4.65  | 0.45 |      |       |     |      |      |      |       |      |     |       |       |       |     | 100   | 93           |
| S9     | 13   | 20       | Ol      | 41.44 |       |       | 9.17  |      | 48.95 |       |      |      |       |     |      |      |      |       | 0.44 |     |       |       |       |     | 100   | 96           |
| S9     | 13   | 21       | Cpx     | 54.05 |       | 3.19  | 1.92  |      | 17.18 | 22.56 |      |      |       |     |      |      |      | 1.11  |      |     |       |       |       |     | 100   | 117          |
| S9     | 13   | 22       | Mix     | 43.20 | 1.50  | 11.18 | 22.57 |      | 11.75 | 9.11  | 0.69 |      |       |     |      |      |      |       |      |     |       |       |       |     | 100   | 104          |
| S9     | 13   | 23       | Chl     | 26.20 |       | 19.47 | 27.28 |      | 11.25 | 0.30  | 0.50 |      |       |     |      |      |      |       |      |     |       |       |       |     | 85    | 97           |
| S9     | 13   | 24       | Zrn     | 31.44 |       |       |       |      |       |       |      |      |       |     |      |      |      |       |      |     |       | 68.56 |       |     | 100   | 125          |



Table B4.1: EDS analyses of sample S9.

| Sample | Site | Position | Mineral                                 | SiO2  | TiO2 | Al2O3 | FeO   | MnO  | MgO   | CaO   | Na2O | K2O | P2O5 | SO3 | F     | Cl | V2O5 | Cr2O3 | NiO  | ZnO | As2O3 | ZrO2 | Ce2O3 | WO3 | Total | Actual Total |
|--------|------|----------|-----------------------------------------|-------|------|-------|-------|------|-------|-------|------|-----|------|-----|-------|----|------|-------|------|-----|-------|------|-------|-----|-------|--------------|
| S9     | 13   | 25       | Opx                                     | 59.08 |      | 0.38  | 4.96  |      | 35.27 | 0.31  |      |     |      |     |       |    |      |       |      |     |       |      |       |     | 100   | 125          |
| S9     | 13   | 26       | Mag                                     | 0.75  |      |       | 98.02 |      | 0.73  |       |      |     |      |     |       |    |      | 0.50  |      |     |       |      |       |     | 100   | 90           |
| S9     | 13   | 27       | "Mag"                                   | 6.34  |      | 0.88  | 91.34 |      | 0.85  | 0.59  |      |     |      |     |       |    |      |       |      |     |       |      |       |     | 100   | 88           |
| S9     | 13   | 28       | Fl                                      | 0.42  |      |       | 2.82  | 0.71 |       | 60.17 |      |     |      |     | 35.88 |    |      |       |      |     |       |      |       |     | 100   | 92           |
| S9     | 13   | 29       | Ol                                      | 41.95 |      |       | 7.91  |      | 49.84 |       |      |     |      |     |       |    |      |       | 0.30 |     |       |      |       |     | 100   | 120          |
|        |      |          | Notes                                   |       |      |       |       |      |       |       |      |     |      |     |       |    |      |       |      |     |       |      |       |     |       |              |
|        |      |          | " " = indicates that mineral is altered |       |      |       |       |      |       |       |      |     |      |     |       |    |      |       |      |     |       |      |       |     |       |              |
|        |      |          | + = indicates other minerals present    |       |      |       |       |      |       |       |      |     |      |     |       |    |      |       |      |     |       |      |       |     |       |              |
|        |      |          |                                         |       |      |       |       |      |       |       |      |     |      |     |       |    |      |       |      |     |       |      |       |     |       |              |

Table B4.2: EDS analyses of sample S9.

| Sample | Site | Position | Mineral     | SiO2   | TiO2  | Al2O3 | FeO   | MnO  | MgO   | CaO   | Na2O  | K2O | P2O5 | SO3   | F    | Cl | V2O5 | Cr2O3 | CoO  | NiO  | ZnO | As2O3 | SrO | ZrO2  | Ag2O | BaO   | La2O3 | Ce2O3 | Nd2O3 | HfO2 | WO3  | Total | Actual Total |
|--------|------|----------|-------------|--------|-------|-------|-------|------|-------|-------|-------|-----|------|-------|------|----|------|-------|------|------|-----|-------|-----|-------|------|-------|-------|-------|-------|------|------|-------|--------------|
| S9     | 14   | 1        | Dol         |        |       |       |       |      | 22.75 | 31.25 |       |     |      |       |      |    |      |       |      |      |     |       |     |       |      |       |       |       |       |      |      | 54    | 57           |
| S9     | 14   | 2        | Ol          | 42.02  |       |       | 7.38  |      | 50.59 |       |       |     |      |       |      |    |      |       |      |      |     |       |     |       |      |       |       |       |       |      |      | 100   | 112          |
| S9     | 14   | 3        | Srp         | 42.71  |       |       | 5.03  | 0.23 | 37.27 | 0.20  |       |     |      |       |      |    |      | 0.44  |      | 0.34 |     |       |     |       |      |       |       |       |       |      |      | 87    | 94           |
| S9     | 14   | 4        | Spl         |        | 0.38  | 36.15 | 19.65 |      | 14.83 |       |       |     |      |       |      |    | 0.39 | 28.60 |      |      |     |       |     |       |      |       |       |       |       |      |      | 100   | 105          |
| S9     | 14   | 5        | Chl         | 26.48  |       | 21.05 | 25.08 |      | 12.39 |       |       |     |      |       |      |    |      |       |      |      |     |       |     |       |      |       |       |       |       |      |      | 85    | 95           |
| S9     | 14   | 6        | Chl         | 33.59  |       | 17.65 | 25.28 | 2.31 | 1.57  | 4.59  |       |     |      |       |      |    |      |       |      |      |     |       |     |       |      |       |       |       |       |      |      | 85    | 110          |
| S9     | 14   | 7        | Chr         |        |       | 29.78 | 16.50 |      | 14.94 |       |       |     |      |       |      |    |      | 38.78 |      |      |     |       |     |       |      |       |       |       |       |      |      | 100   | 106          |
| S9     | 14   | 8        | Chr         |        |       | 15.98 | 19.60 |      | 12.63 |       |       |     |      |       |      |    |      | 51.79 |      |      |     |       |     |       |      |       |       |       |       |      |      | 100   | 105          |
| S9     | 14   | 9        | Ti-Mag      | 0.68   | 18.01 | 3.01  | 74.53 | 0.99 | 1.85  |       |       |     |      |       |      |    | 0.93 |       |      |      |     |       |     |       |      |       |       |       |       |      |      | 100   | 100          |
| S9     | 14   | 10       | Cpx         | 50.41  | 2.11  | 5.25  | 7.43  | 0.24 | 13.77 | 20.37 | 0.43  |     |      |       |      |    |      |       |      |      |     |       |     |       |      |       |       |       |       |      |      | 100   | 114          |
| S9     | 14   | 11       | Ab +        | 61.37  |       | 23.72 |       |      |       |       | 14.05 |     |      |       | 0.86 |    |      |       |      |      |     |       |     |       |      |       |       |       |       |      |      | 100   | 105          |
| S9     | 14   | 12       | Spl         |        |       | 42.33 | 15.08 |      | 17.19 |       |       |     |      |       |      |    |      | 25.41 |      |      |     |       |     |       |      |       |       |       |       |      |      | 100   | 107          |
| S9     | 14   | 13       | Feohy +     | 4.70   |       | 1.24  | 76.03 |      | 5.14  |       |       |     |      |       |      |    |      | 12.89 |      |      |     |       |     |       |      |       |       |       |       |      |      | 100   | 98           |
| S9     | 14   | 14       | Srp         | 40.72  |       | 2.07  | 4.41  |      | 35.65 | 0.24  |       |     |      |       | 1.65 |    |      | 0.50  |      |      |     |       |     |       |      |       |       |       |       |      | 1.74 | 87    | 97           |
| S9     | 14   | 15       | Cpx         | 52.69  | 0.99  | 1.82  | 13.94 | 0.39 | 14.70 | 15.20 | 0.27  |     |      |       |      |    |      |       |      |      |     |       |     |       |      |       |       |       |       |      |      | 100   | 119          |
| S9     | 14   | 16       | "Ilm" +     | 7.62   | 26.73 | 1.56  | 56.04 | 0.65 |       | 6.18  |       |     |      |       |      |    | 1.22 |       |      |      |     |       |     |       |      |       |       |       |       |      |      | 100   | 104          |
| S9     | 14   | 17       | Ol          | 41.76  |       |       | 8.50  | 0.21 | 49.12 |       |       |     |      |       |      |    |      |       |      | 0.41 |     |       |     |       |      |       |       |       |       |      |      | 100   | 124          |
| S9     | 14   | 18       | Spl         |        |       | 33.25 | 15.84 |      | 15.16 |       |       |     |      |       |      |    | 0.33 | 35.42 |      |      |     |       |     |       |      |       |       |       |       |      |      | 100   | 113          |
| S9     | 14   | 19       | Spl         |        | 0.82  | 31.00 | 20.39 |      | 13.89 |       |       |     |      |       |      |    | 0.44 | 33.47 |      |      |     |       |     |       |      |       |       |       |       |      |      | 100   | 104          |
| S9     | 14   | 20       | Chr +       | 7.56   |       | 9.07  | 44.03 |      | 10.29 |       |       |     |      |       |      |    |      | 29.05 |      |      |     |       |     |       |      |       |       |       |       |      |      | 100   | 104          |
| S9     | 14   | 21       | Al-Srp      | 39.84  |       | 16.80 | 3.55  |      | 39.29 |       |       |     |      |       |      |    |      | 0.51  |      |      |     |       |     |       |      |       |       |       |       |      |      | 100   | 99           |
| S9     | 14   | 22       | TiO2        | 0.64   | 98.69 | 0.38  | 0.29  |      |       |       |       |     |      |       |      |    |      |       |      |      |     |       |     |       |      |       |       |       |       |      |      | 100   | 106          |
| S9     | 14   | 23       | Cpx         | 52.25  | 1.88  | 3.71  | 6.49  |      | 15.65 | 19.60 | 0.42  |     |      |       |      |    |      |       |      |      |     |       |     |       |      |       |       |       |       |      |      | 100   | 117          |
| S9     | 14   | 24       | Ol          | 41.74  |       |       | 8.11  | 0.20 | 49.55 |       |       |     |      |       |      |    |      |       |      | 0.40 |     |       |     |       |      |       |       |       |       |      |      | 100   | 117          |
| S9     | 14   | 25       | TiO2        |        | 99.70 |       | 0.30  |      |       |       |       |     |      |       |      |    |      |       |      |      |     |       |     |       |      |       |       |       |       |      |      | 100   | 105          |
| S9     | 14   | 26       | Chr         |        |       | 9.67  | 24.19 |      | 8.40  |       |       |     |      |       |      |    | 0.53 | 57.21 |      |      |     |       |     |       |      |       |       |       |       |      |      | 100   | 102          |
| S9     | 14   | 27       | "Mag"       | 1.03   |       |       | 95.95 | 1.53 | 1.49  |       |       |     |      |       |      |    |      |       |      |      |     |       |     |       |      |       |       |       |       |      |      | 100   | 88           |
| S9     | 14   | 28       | Feohy +     | 11.61  |       | 0.45  | 71.97 |      | 15.49 |       |       |     |      |       |      |    |      | 0.48  |      |      |     |       |     |       |      |       |       |       |       |      |      | 100   | 100          |
| S9     | 14   | 29       | Dol         |        |       |       |       |      | 22.69 | 31.31 |       |     |      |       |      |    |      |       |      |      |     |       |     |       |      |       |       |       |       |      |      | 54    | 56           |
| S9     | 14   | 30       | Ab          | 68.53  |       | 19.24 |       |      |       | 0.74  | 11.49 |     |      |       |      |    |      |       |      |      |     |       |     |       |      |       |       |       |       |      |      | 100   | 121          |
| S9     | 14   | 31       | Chl         | 29.90  |       | 17.10 | 19.93 | 0.24 | 17.09 | 0.48  | 0.26  |     |      |       |      |    |      |       |      |      |     |       |     |       |      |       |       |       |       |      |      | 85    | 100          |
| S9     | 14   | 32       | Cpx         | 53.86  |       | 3.55  | 1.91  |      | 17.40 | 22.34 |       |     |      |       |      |    |      | 0.94  |      |      |     |       |     |       |      |       |       |       |       |      |      | 100   | 118          |
| S9     | 14   | 33       | TiO2        | 0.51   | 99.49 |       |       |      |       |       |       |     |      |       |      |    |      |       |      |      |     |       |     |       |      |       |       |       |       |      |      | 100   | 105          |
| S9     | 14   | 34       | Ab          | 62.22  | 0.53  | 23.30 | 0.39  |      |       | 0.51  | 13.04 |     |      |       |      |    |      |       |      |      |     |       |     |       |      |       |       |       |       |      |      | 100   | 104          |
| S9     | 14   | 35       | Ttn + Feohy | 15.65  | 28.02 | 2.78  | 41.66 | 0.56 |       | 11.34 |       |     |      |       |      |    |      |       |      |      |     |       |     |       |      |       |       |       |       |      |      | 100   | 101          |
| S9     | 14   | 36       | Ttn         | 35.34  | 27.89 | 5.59  | 2.24  |      |       | 27.02 |       |     |      |       | 1.93 |    |      |       |      |      |     |       |     |       |      |       |       |       |       |      |      | 100   | 109          |
| S9     | 14   | 37       | "Ilm"       |        | 14.73 | 2.90  | 78.38 | 0.76 | 2.27  |       |       |     |      |       |      |    | 0.96 |       |      |      |     |       |     |       |      |       |       |       |       |      |      | 100   | 95           |
| S9     | 15   | 1        | Opx         | 55.78  |       | 4.08  | 5.56  |      | 33.48 | 0.35  |       |     |      |       |      |    |      | 0.75  |      |      |     |       |     |       |      |       |       |       |       |      |      | 100   | 122          |
| S9     | 15   | 2        | Qz          | 100.00 |       |       |       |      |       |       |       |     |      |       |      |    |      |       |      |      |     |       |     |       |      |       |       |       |       |      |      | 100   | 119          |
| S9     | 15   | 3        | Grt         | 39.43  |       | 21.01 | 29.22 | 1.04 | 2.20  | 7.11  |       |     |      |       |      |    |      |       |      |      |     |       |     |       |      |       |       |       |       |      |      | 100   | 111          |
| S9     | 15   | 4        | Dol         |        |       |       |       |      | 22.71 | 31.29 |       |     |      |       |      |    |      |       |      |      |     |       |     |       |      |       |       |       |       |      |      | 54    | 55           |
| S9     | 15   | 5        | Ol          | 42.17  |       |       | 7.84  |      | 49.64 |       |       |     |      |       |      |    |      |       |      | 0.34 |     |       |     |       |      |       |       |       |       |      |      | 100   | 114          |
| S9     | 15   | 6        | Chr         |        | 0.73  | 2.66  | 57.91 |      | 2.93  |       |       |     |      |       |      |    |      | 35.77 |      |      |     |       |     |       |      |       |       |       |       |      |      | 100   | 98           |
| S9     | 15   | 7        | Zrn         | 31.01  |       |       |       |      |       |       |       |     |      |       |      |    |      |       |      |      |     |       |     | 67.38 |      |       |       |       |       | 1.61 |      | 100   | 118          |
| S9     | 15   | 8        | Chr         |        |       | 19.73 | 17.04 |      | 12.52 |       |       |     |      |       |      |    |      | 50.71 |      |      |     |       |     |       |      |       |       |       |       |      |      | 100   | 105          |
| S9     | 15   | 9        | Chr         |        |       | 12.20 | 24.82 |      | 9.34  |       |       |     |      |       |      |    |      | 53.64 |      |      |     |       |     |       |      |       |       |       |       |      |      | 100   | 101          |
| S9     | 15   | 10       | Brt         |        |       |       |       |      |       |       |       |     |      | 37.00 |      |    |      |       | 0.01 |      |     |       |     |       |      | 62.99 |       |       |       |      |      | 100   | 107          |
| S9     | 15   | 11       | Tur         | 38.28  | 0.48  | 29.20 | 9.07  |      | 6.75  | 0.60  | 2.63  |     |      |       |      |    |      |       |      |      |     |       |     |       |      |       |       |       |       |      |      | 87    | 96           |

Table B4.2: EDS analyses of sample S9.

| Sample | Site | Position | Mineral | SiO2  | TiO2  | Al2O3 | FeO   | MnO  | MgO   | CaO   | Na2O | K2O  | P2O5 | SO3  | F    | Cl | V2O5 | Cr2O3 | CoO | NiO  | ZnO  | As2O3 | SrO | ZrO2 | Ag2O | BaO | La2O3 | Ce2O3 | Nd2O3 | HfO2 | WO3  | Total | Actual Total |     |     |
|--------|------|----------|---------|-------|-------|-------|-------|------|-------|-------|------|------|------|------|------|----|------|-------|-----|------|------|-------|-----|------|------|-----|-------|-------|-------|------|------|-------|--------------|-----|-----|
| S9     | 15   | 12       | "Mag" + | 4.68  |       |       | 92.09 | 1.09 |       | 0.44  |      |      |      | 1.68 |      |    |      |       |     |      |      |       |     |      |      |     |       |       |       |      |      | 100   | 81           |     |     |
| S9     | 15   | 13       | "Mag" + | 1.14  |       |       | 98.04 |      |       |       |      |      |      |      |      |    |      | 0.34  |     | 0.48 |      |       |     |      |      |     |       |       |       |      |      | 100   | 94           |     |     |
| S9     | 15   | 14       | Srp     | 41.74 |       | 0.38  | 8.67  |      | 34.16 |       |      |      |      |      |      |    |      | 1.24  |     |      |      |       |     |      |      |     |       |       |       |      | 0.81 | 87    | 97           |     |     |
| S9     | 15   | 15       | Chr     |       |       | 26.97 | 20.70 |      | 12.25 |       |      |      |      |      |      |    | 0.40 | 39.24 |     |      | 0.45 |       |     |      |      |     |       |       |       |      |      |       | 100          | 109 |     |
| S9     | 15   | 16       | Cpx     | 52.55 | 1.28  | 2.95  | 8.85  | 0.31 | 15.11 | 18.95 |      |      |      |      |      |    |      |       |     |      |      |       |     |      |      |     |       |       |       |      |      |       | 100          | 117 |     |
| S9     | 15   | 17       | Cpx     | 54.09 | 0.41  | 1.39  | 9.29  | 0.36 | 14.83 | 19.32 | 0.31 |      |      |      |      |    |      |       |     |      |      |       |     |      |      |     |       |       |       |      |      |       | 100          | 115 |     |
| S9     | 15   | 18       | Grt     | 39.99 |       | 21.06 | 23.57 | 4.35 | 1.28  | 9.75  |      |      |      |      |      |    |      |       |     |      |      |       |     |      |      |     |       |       |       |      |      |       | 100          | 112 |     |
| S9     | 15   | 19       | Opx     | 56.80 |       | 2.96  | 5.34  |      | 33.72 | 0.65  |      |      |      |      |      |    |      | 0.54  |     |      |      |       |     |      |      |     |       |       |       |      |      |       | 100          | 119 |     |
| S9     | 15   | 20       | Chr     |       |       | 16.99 | 19.17 |      | 11.02 |       |      |      |      |      |      |    |      | 52.82 |     |      |      |       |     |      |      |     |       |       |       |      |      |       | 100          | 107 |     |
| S9     | 15   | 21       | Spl     |       |       | 32.27 | 14.74 |      | 15.46 |       |      |      |      |      |      |    | 0.36 | 37.17 |     |      |      |       |     |      |      |     |       |       |       |      |      |       | 100          | 108 |     |
| S9     | 15   | 22       | Chr     |       |       | 9.69  | 23.02 |      | 8.15  |       |      |      |      |      |      |    |      | 59.14 |     |      |      |       |     |      |      |     |       |       |       |      |      |       | 100          | 108 |     |
| S9     | 15   | 23       | Ol +    | 51.32 |       |       | 2.20  |      | 46.49 |       |      |      |      |      |      |    |      |       |     |      |      |       |     |      |      |     |       |       |       |      |      |       | 100          | 102 |     |
| S9     | 15   | 24       | Grt     | 39.69 |       | 21.13 | 29.93 |      | 1.45  | 7.80  |      |      |      |      |      |    |      |       |     |      |      |       |     |      |      |     |       |       |       |      |      |       | 100          | 115 |     |
| S9     | 15   | 25       | Chr     |       |       | 15.12 | 20.55 |      | 9.74  |       |      |      |      |      |      |    |      | 54.59 |     |      |      |       |     |      |      |     |       |       |       |      |      |       | 100          | 107 |     |
| S9     | 15   | 26       | Ol      | 42.09 |       |       | 6.45  |      | 51.03 |       |      |      |      |      |      |    |      |       |     | 0.43 |      |       |     |      |      |     |       |       |       |      |      |       | 100          | 123 |     |
| S9     | 15   | 27       | Cpx     | 50.05 | 2.40  | 4.94  | 8.33  |      | 13.07 | 20.81 | 0.40 |      |      |      |      |    |      |       |     |      |      |       |     |      |      |     |       |       |       |      |      |       | 100          | 117 |     |
| S9     | 15   | 28       | Chr     |       |       | 24.81 | 17.89 |      | 13.02 |       |      |      |      |      |      |    |      | 44.28 |     |      |      |       |     |      |      |     |       |       |       |      |      |       |              | 100 | 104 |
| S9     | 15   | 29       | Opx     | 56.38 |       | 3.57  | 5.56  |      | 33.51 | 0.39  |      |      |      |      |      |    |      | 0.58  |     |      |      |       |     |      |      |     |       |       |       |      |      |       | 100          | 110 |     |
| S9     | 15   | 30       | Spl     |       |       | 46.44 | 12.78 |      | 18.59 |       |      |      |      |      |      |    |      | 22.19 |     |      |      |       |     |      |      |     |       |       |       |      |      |       | 100          | 107 |     |
| S9     | 15   | 31       | Grt     | 40    |       | 21    | 32    |      | 3     | 4     |      |      |      |      |      |    |      |       |     |      |      |       |     |      |      |     |       |       |       |      |      |       | 100          | 107 |     |
| S9     | 15   | 32       | Chr     |       |       | 9.38  | 24.82 |      | 9.52  |       |      |      |      |      |      |    |      | 56.28 |     |      |      |       |     |      |      |     |       |       |       |      |      |       | 100          | 105 |     |
| S9     | 15   | 33       | Ads +   | 56.54 | 0.86  | 17.40 | 7.13  |      | 4.87  | 7.59  | 5.61 |      |      |      |      |    |      |       |     |      |      |       |     |      |      |     |       |       |       |      |      |       | 100          | 113 |     |
| S9     | 15   | 34       | Grt     | 37.98 |       | 19.93 | 24.83 | 2.34 | 1.68  | 10.97 |      |      | 2.27 |      |      |    |      |       |     |      |      |       |     |      |      |     |       |       |       |      |      |       | 100          | 106 |     |
| S9     | 15   | 35       | Feohy   | 6.30  |       | 1.43  | 88.88 |      | 0.77  |       |      |      |      |      |      |    |      |       |     | 2.62 |      |       |     |      |      |     |       |       |       |      |      |       | 100          | 82  |     |
| S9     | 15   | 36       | Qz      | 99.76 |       |       | 0.24  |      |       |       |      |      |      |      |      |    |      |       |     |      |      |       |     |      |      |     |       |       |       |      |      |       | 100          | 127 |     |
| S9     | 16   | 1        | Chr     |       |       | 14.15 | 16.38 |      | 12.62 |       |      |      |      |      |      |    |      | 56.85 |     |      |      |       |     |      |      |     |       |       |       |      |      |       | 100          | 106 |     |
| S9     | 16   | 2        | Ol      | 41.86 |       |       | 8.90  |      | 49.24 |       |      |      |      |      |      |    |      |       |     |      |      |       |     |      |      |     |       |       |       |      |      |       | 100          | 113 |     |
| S9     | 16   | 3        | Chr     |       |       | 14.28 | 20.25 |      | 10.87 |       |      |      |      |      |      |    |      | 54.60 |     |      |      |       |     |      |      |     |       |       |       |      |      |       | 100          | 103 |     |
| S9     | 16   | 4        | "Mag" + | 6.11  |       |       | 93.50 |      |       | 0.39  |      |      |      |      |      |    |      |       |     |      |      |       |     |      |      |     |       |       |       |      |      |       | 100          | 79  |     |
| S9     | 16   | 5        | Chr     |       |       | 21.74 | 23.64 |      | 10.85 |       |      |      |      |      |      |    |      | 43.76 |     |      |      |       |     |      |      |     |       |       |       |      |      |       | 100          | 109 |     |
| S9     | 16   | 6        | Chr     |       |       | 8.01  | 26.58 |      | 7.67  |       |      |      |      |      |      |    |      | 57.74 |     |      |      |       |     |      |      |     |       |       |       |      |      |       | 100          | 109 |     |
| S9     | 16   | 7        | Grt     | 39.51 |       | 21.23 | 29.57 | 4.42 | 3.19  | 2.08  |      |      |      |      |      |    |      |       |     |      |      |       |     |      |      |     |       |       |       |      |      |       | 100          | 107 |     |
| S9     | 16   | 8        | Ol      | 41.69 |       |       | 8.15  |      | 49.78 |       |      |      |      |      |      |    |      |       |     | 0.38 |      |       |     |      |      |     |       |       |       |      |      |       | 100          | 111 |     |
| S9     | 16   | 9        | Cpx     | 52.57 | 0.24  | 6.03  | 2.43  |      | 15.99 | 21.23 | 0.51 |      |      |      |      |    |      | 0.99  |     |      |      |       |     |      |      |     |       |       |       |      |      |       | 100          | 115 |     |
| S9     | 16   | 10       | Cpx     | 48.94 | 3.46  | 5.18  | 9.03  | 0.30 | 12.18 | 20.25 | 0.66 |      |      |      |      |    |      |       |     |      |      |       |     |      |      |     |       |       |       |      |      |       | 100          | 112 |     |
| S9     | 16   | 11       | Mix     | 53.73 |       | 18.11 | 8.93  | 0.47 | 9.58  | 0.81  | 2.63 | 3.09 |      |      | 2.64 |    |      |       |     |      |      |       |     |      |      |     |       |       |       |      |      |       | 100          | 105 |     |
| S9     | 16   | 12       | Grt     | 39.33 |       | 20.88 | 35.17 | 1.69 | 2.11  | 0.82  |      |      |      |      |      |    |      |       |     |      |      |       |     |      |      |     |       |       |       |      |      |       | 100          | 111 |     |
| S9     | 16   | 13       | Ol      | 42.01 |       |       | 8.62  |      | 48.95 |       |      |      |      |      |      |    |      |       |     | 0.41 |      |       |     |      |      |     |       |       |       |      |      |       | 100          | 113 |     |
| S9     | 16   | 14       | Amph    | 44.71 | 1.67  | 14.76 | 10.08 |      | 9.32  | 10.35 | 0.64 | 1.84 |      |      | 3.63 |    |      |       |     |      |      |       |     |      |      |     |       |       |       |      |      | 97    | 111          |     |     |
| S9     | 16   | 15       | "Mag" + | 3.69  |       | 0.86  | 95.05 |      |       | 0.40  |      |      |      |      |      |    |      |       |     |      |      |       |     |      |      |     |       |       |       |      |      |       | 100          | 84  |     |
| S9     | 16   | 16       | "Ilm" + | 1.94  | 18.06 | 4.20  | 70.04 | 1.13 | 2.75  |       |      |      |      |      |      |    | 1.36 | 0.53  |     |      |      |       |     |      |      |     |       |       |       |      |      |       | 100          | 97  |     |
| S9     | 16   | 17       | Grt     | 39.42 |       | 20.98 | 27.75 | 0.78 | 2.28  | 8.79  |      |      |      |      |      |    |      |       |     |      |      |       |     |      |      |     |       |       |       |      |      |       | 100          | 119 |     |
| S9     | 16   | 18       | Chr     |       |       | 28.75 | 17.23 |      | 14.20 |       |      |      |      |      |      |    |      | 39.82 |     |      |      |       |     |      |      |     |       |       |       |      |      |       | 100          | 114 |     |
| S9     | 16   | 19       | Feohy + | 9.33  |       | 3.56  | 84.72 |      | 1.34  | 0.41  |      | 0.63 |      |      |      |    |      |       |     |      |      |       |     |      |      |     |       |       |       |      |      |       | 100          | 85  |     |
| S9     | 16   | 20       | Cpx     | 54.60 |       | 2.74  | 1.77  |      | 17.36 | 22.68 |      |      |      |      |      |    |      | 0.84  |     |      |      |       |     |      |      |     |       |       |       |      |      |       | 100          | 112 |     |
| S9     | 16   | 21       | Cpx     | 53.77 | 1.01  | 1.40  | 8.87  | 0.28 | 13.81 | 20.38 | 0.49 |      |      |      |      |    |      |       |     |      |      |       |     |      |      |     |       |       |       |      |      |       | 100          | 111 |     |
| S9     | 16   | 22       | Ol      | 41.70 |       |       | 8.39  |      | 49.51 |       |      |      |      |      |      |    |      |       |     | 0.40 |      |       |     |      |      |     |       |       |       |      |      |       | 100          | 114 |     |
| S9     | 16   | 23       | Chr     |       |       | 17.26 | 17.68 |      | 14.18 |       |      |      |      |      |      |    |      | 50.88 |     |      |      |       |     |      |      |     |       |       |       |      |      |       | 100          | 105 |     |

Table B4.2: EDS analyses of sample S9.

| Sample | Site | Position | Mineral | SiO2   | TiO2  | Al2O3 | FeO   | MnO  | MgO   | CaO   | Na2O | K2O   | P2O5 | SO3  | F     | Cl | V2O5 | Cr2O3 | CoO | NiO  | ZnO  | As2O3 | SrO | ZrO2 | Ag2O | BaO | La2O3 | Ce2O3 | Nd2O3 | HfO2 | WO3 | Total | Actual Total |
|--------|------|----------|---------|--------|-------|-------|-------|------|-------|-------|------|-------|------|------|-------|----|------|-------|-----|------|------|-------|-----|------|------|-----|-------|-------|-------|------|-----|-------|--------------|
| S9     | 16   | 24       | TiO2 +  | 6.36   | 87.47 |       | 0.46  |      |       | 5.70  |      |       |      |      |       |    |      |       |     |      |      |       |     |      |      |     |       |       |       |      |     | 100   | 103          |
| S9     | 16   | 25       | Ttn     | 30.56  | 37.83 | 0.88  | 5.34  | 1.11 |       | 24.28 |      |       |      |      |       |    |      |       |     |      |      |       |     |      |      |     |       |       |       |      |     | 100   | 103          |
| S9     | 16   | 26       | Cpx     | 53.47  | 0.43  | 3.30  | 4.92  |      | 16.70 | 20.90 |      |       |      |      |       |    |      | 0.27  |     |      |      |       |     |      |      |     |       |       |       |      |     | 100   | 115          |
| S9     | 17   | 1        | Chr     |        | 0.31  | 15.05 | 24.87 |      | 8.78  |       |      |       |      |      |       |    |      | 50.99 |     |      |      |       |     |      |      |     |       |       |       |      |     | 100   | 106          |
| S9     | 17   | 2        | Chr     |        |       | 16.57 | 18.97 |      | 10.86 |       |      |       |      |      |       |    |      | 53.60 |     |      |      |       |     |      |      |     |       |       |       |      |     | 100   | 104          |
| S9     | 17   | 3        | Chr     |        |       | 11.78 | 22.20 |      | 9.80  |       |      |       |      |      |       |    |      | 56.22 |     |      |      |       |     |      |      |     |       |       |       |      |     | 100   | 108          |
| S9     | 17   | 4        | Chr     |        |       | 8.37  | 21.62 |      | 9.37  |       |      |       |      |      |       |    |      | 60.63 |     |      |      |       |     |      |      |     |       |       |       |      |     | 100   | 110          |
| S9     | 17   | 5        | Ol      | 41.93  |       |       | 8.26  |      | 49.35 |       |      |       |      |      |       |    |      |       |     | 0.46 |      |       |     |      |      |     |       |       |       |      |     | 100   | 115          |
| S9     | 17   | 6        | Cpx     | 50.64  | 2.28  | 4.48  | 8.50  |      | 12.69 | 20.93 | 0.48 |       |      |      |       |    |      |       |     |      |      |       |     |      |      |     |       |       |       |      |     | 100   | 110          |
| S9     | 17   | 7        | Ol      | 42.00  |       |       | 8.59  |      | 49.41 |       |      |       |      |      |       |    |      |       |     |      |      |       |     |      |      |     |       |       |       |      |     | 100   | 110          |
| S9     | 17   | 8        | Act     | 55.62  |       | 2.79  | 2.78  |      | 25.55 | 10.25 |      |       |      |      |       |    |      |       |     |      |      |       |     |      |      |     |       |       |       |      |     | 97    | 111          |
| S9     | 17   | 9        | Ep      | 39.43  |       | 20.26 | 18.45 | 1.22 | 0.60  | 17.03 |      |       |      |      |       |    |      |       |     |      |      |       |     |      |      |     |       |       |       |      |     | 97    | 109          |
| S9     | 17   | 10       | Spl     |        | 0.45  | 30.85 | 24.63 |      | 12.22 |       |      |       |      |      |       |    |      | 31.86 |     |      |      |       |     |      |      |     |       |       |       |      |     | 100   | 107          |
| S9     | 17   | 11       | Ol      | 43.27  |       |       | 8.69  |      | 47.62 |       |      |       |      |      |       |    |      |       |     | 0.42 |      |       |     |      |      |     |       |       |       |      |     | 100   | 102          |
| S9     | 17   | 12       | Cpx     | 55.14  |       | 0.77  | 8.73  | 0.46 | 15.11 | 19.78 |      |       |      |      |       |    |      |       |     |      |      |       |     |      |      |     |       |       |       |      |     | 100   | 116          |
| S9     | 17   | 13       | Chr     | 0.73   | 0.72  | 2.00  | 55.87 | 2.81 | 1.14  |       |      |       |      |      |       |    |      | 36.72 |     |      |      |       |     |      |      |     |       |       |       |      |     | 100   | 97           |
| S9     | 17   | 14       | Mix     | 46.18  | 1.06  | 14.95 | 18.74 | 0.28 | 12.16 | 3.47  | 3.16 |       |      |      |       |    |      |       |     |      |      |       |     |      |      |     |       |       |       |      |     | 100   | 92           |
| S9     | 17   | 15       | Ol      | 41.91  |       |       | 8.36  |      | 49.38 |       |      |       |      |      |       |    |      |       |     | 0.35 |      |       |     |      |      |     |       |       |       |      |     | 100   | 112          |
| S9     | 17   | 16       | Grt     | 39.93  |       | 21.40 | 29.93 | 4.49 | 3.32  | 0.93  |      |       |      |      |       |    |      |       |     |      |      |       |     |      |      |     |       |       |       |      |     | 100   | 109          |
| S9     | 17   | 17       | Ms      | 51.14  | 0.41  | 24.37 | 4.95  |      | 3.12  |       |      | 11.01 |      |      |       |    |      |       |     |      |      |       |     |      |      |     |       |       |       |      |     | 95    | 108          |
| S9     | 17   | 18       | Chr     |        |       | 13.52 | 19.01 |      | 11.33 |       |      |       |      |      |       |    |      | 56.13 |     |      |      |       |     |      |      |     |       |       |       |      |     | 100   | 106          |
| S9     | 17   | 19       | Mag     | 0.78   |       |       | 97.42 |      |       |       |      |       |      |      |       |    |      | 1.80  |     |      |      |       |     |      |      |     |       |       |       |      |     | 100   | 94           |
| S9     | 17   | 20       | Ol      | 39.82  |       |       | 13.07 |      | 46.44 |       |      |       |      |      |       |    |      |       |     | 0.67 |      |       |     |      |      |     |       |       |       |      |     | 100   | 106          |
| S9     | 17   | 21       | Ol      | 41.84  |       |       | 7.97  |      | 49.88 |       |      |       |      |      |       |    |      |       |     | 0.31 |      |       |     |      |      |     |       |       |       |      |     | 100   | 110          |
| S9     | 17   | 22       | Ilm +   | 15.27  | 16.20 | 2.96  | 52.86 | 0.54 | 3.30  | 8.23  |      |       |      |      |       |    | 0.64 |       |     |      |      |       |     |      |      |     |       |       |       |      |     | 100   | 96           |
| S9     | 17   | 23       | Cpx     | 58.35  |       | 1.34  | 4.41  | 0.23 | 21.51 | 14.17 |      |       |      |      |       |    |      |       |     |      |      |       |     |      |      |     |       |       |       |      |     | 100   | 119          |
| S9     | 17   | 24       | Opx     | 56.44  |       | 2.69  | 4.79  |      | 31.65 | 3.68  |      |       |      |      |       |    |      | 0.74  |     |      |      |       |     |      |      |     |       |       |       |      |     | 100   | 121          |
| S9     | 17   | 25       | Chl     | 27.83  |       | 18.69 | 21.38 |      | 16.79 |       |      |       |      |      |       |    |      | 0.31  |     |      |      |       |     |      |      |     |       |       |       |      |     | 85    | 103          |
| S9     | 17   | 26       | Chr     | 0.63   |       | 2.31  | 35.85 | 3.49 | 3.40  |       |      |       |      |      |       |    |      | 53.62 |     |      | 0.70 |       |     |      |      |     |       |       |       |      |     | 100   | 101          |
| S9     | 17   | 27       | Dol     | 0.57   |       |       | 1.78  |      | 20.91 | 30.73 |      |       |      |      |       |    |      |       |     |      |      |       |     |      |      |     |       |       |       |      |     | 54    | 55           |
| S9     | 17   | 28       | Ti-Mag  |        | 17.84 | 4.16  | 71.37 | 0.51 | 4.49  |       |      |       |      |      |       |    | 1.62 |       |     |      |      |       |     |      |      |     |       |       |       |      |     | 100   | 95           |
| S9     | 17   | 29       | Amph?   | 44.75  | 2.95  | 9.64  | 19.04 | 0.50 | 9.88  | 8.32  | 1.76 | 0.16  |      |      |       |    |      |       |     |      |      |       |     |      |      |     |       |       |       |      |     | 97    | 109          |
| S9     | 17   | 30       | Grt     | 39.64  |       | 20.37 | 30.83 | 1.15 | 1.52  | 6.49  |      |       |      |      |       |    |      |       |     |      |      |       |     |      |      |     |       |       |       |      |     | 100   | 109          |
| S9     | 17   | 31       | Chr     |        |       | 9.68  | 23.30 |      | 10.92 |       |      |       |      |      |       |    |      | 56.10 |     |      |      |       |     |      |      |     |       |       |       |      |     | 100   | 104          |
| S9     | 18   | 1        | Ol      | 41.81  |       |       | 7.90  |      | 49.95 |       |      |       |      |      |       |    |      |       |     | 0.34 |      |       |     |      |      |     |       |       |       |      |     | 100   | 113          |
| S9     | 18   | 2        | "Ilm"   | 1.96   | 19.57 | 3.24  | 72.62 | 1.54 |       |       |      |       |      |      |       |    | 1.07 |       |     |      |      |       |     |      |      |     |       |       |       |      |     | 100   | 95           |
| S9     | 18   | 3        | Chr     |        | 0.42  | 26.77 | 18.83 |      | 13.37 |       |      |       |      |      |       |    |      | 40.61 |     |      |      |       |     |      |      |     |       |       |       |      |     | 100   | 107          |
| S9     | 18   | 4        | Qz      | 100.00 |       |       |       |      |       |       |      |       |      |      |       |    |      |       |     |      |      |       |     |      |      |     |       |       |       |      |     | 100   | 116          |
| S9     | 18   | 5        | Opx     | 57.84  |       | 1.27  | 4.98  |      | 34.93 | 0.34  |      |       |      |      |       |    |      | 0.63  |     |      |      |       |     |      |      |     |       |       |       |      |     | 100   | 113          |
| S9     | 18   | 6        | Chr     |        |       | 10.62 | 27.29 |      | 8.72  |       |      |       |      |      |       |    |      | 53.36 |     |      |      |       |     |      |      |     |       |       |       |      |     | 100   | 103          |
| S9     | 18   | 7        | Chr     |        |       | 30.65 | 12.83 |      | 17.40 |       |      |       |      |      |       |    |      | 39.11 |     |      |      |       |     |      |      |     |       |       |       |      |     | 100   | 110          |
| S9     | 18   | 8        | Chr     |        | 0.38  | 10.53 | 36.26 |      | 6.29  |       |      |       |      |      |       |    |      | 46.55 |     |      |      |       |     |      |      |     |       |       |       |      |     | 100   | 107          |
| S9     | 18   | 9        | Opx     | 55.55  |       | 4.25  | 5.78  |      | 33.09 | 0.68  |      |       |      |      |       |    |      | 0.66  |     |      |      |       |     |      |      |     |       |       |       |      |     | 100   | 124          |
| S9     | 18   | 10       | Cpx     | 54.38  |       | 3.21  | 1.94  |      | 17.05 | 22.60 |      |       |      |      |       |    |      | 0.81  |     |      |      |       |     |      |      |     |       |       |       |      |     | 100   | 120          |
| S9     | 18   | 11       | Chr     |        |       | 26.42 | 15.70 |      | 14.00 |       |      |       |      |      |       |    |      | 43.89 |     |      |      |       |     |      |      |     |       |       |       |      |     | 100   | 112          |
| S9     | 18   | 12       | Opx     | 56.17  |       | 3.69  | 5.42  |      | 33.66 | 0.30  |      |       |      |      |       |    |      | 0.76  |     |      |      |       |     |      |      |     |       |       |       |      |     | 100   | 120          |
| S9     | 18   | 13       | Grt     | 41.61  |       | 21.29 | 26.23 | 1.05 | 8.74  | 1.07  |      |       |      |      |       |    |      |       |     |      |      |       |     |      |      |     |       |       |       |      |     | 100   | 114          |
| S9     | 18   | 14       | Fl +    | 1.09   |       | 0.40  | 8.54  |      | 0.58  | 44.72 | 0.68 |       |      | 5.20 | 38.79 |    |      |       |     |      |      |       |     |      |      |     |       |       |       |      |     | 100   | 96           |



Table B4.2: EDS analyses of sample S9.

| Sample | Site | Position | Mineral     | SiO2  | TiO2   | Al2O3 | FeO   | MnO  | MgO   | CaO   | Na2O | K2O  | P2O5 | SO3   | F    | Cl   | V2O5 | Cr2O3 | CoO   | NiO  | ZnO  | As2O3 | SrO | ZrO2 | Ag2O | BaO | La2O3 | Ce2O3 | Nd2O3 | HfO2 | WO3  | Total | Actual Total |
|--------|------|----------|-------------|-------|--------|-------|-------|------|-------|-------|------|------|------|-------|------|------|------|-------|-------|------|------|-------|-----|------|------|-----|-------|-------|-------|------|------|-------|--------------|
| S9     | 18   | 15       | Dol         |       |        |       |       |      | 22.74 | 31.26 |      |      |      |       |      |      |      |       |       |      |      |       |     |      |      |     |       |       |       |      |      | 54    | 55           |
| S9     | 18   | 16       | Ol          | 42.20 |        |       | 7.84  |      | 49.96 |       |      |      |      |       |      |      |      |       |       |      |      |       |     |      |      |     |       |       |       |      |      | 100   | 105          |
| S9     | 18   | 17       | Grt         | 38.15 | 0.76   |       | 26.39 |      |       | 34.27 |      |      |      |       |      |      |      | 0.44  |       |      |      |       |     |      |      |     |       |       |       |      |      | 100   | 103          |
| S9     | 18   | 18       | "Ol"        | 49.90 |        |       | 5.43  |      | 44.67 |       |      |      |      |       |      |      |      |       |       |      |      |       |     |      |      |     |       |       |       |      |      | 100   | 98           |
| S9     | 18   | 19       | Ol          | 41.87 |        |       | 8.43  |      | 49.70 |       |      |      |      |       |      |      |      |       |       |      |      |       |     |      |      |     |       |       |       |      |      | 100   | 110          |
| S9     | 18   | 20       | Hbl         | 45.35 | 3.47   | 11.26 | 13.71 | 0.27 | 9.12  | 9.70  | 3.22 |      | 0.90 |       |      |      |      |       |       |      |      |       |     |      |      |     |       |       |       |      |      | 97    | 113          |
| S9     | 18   | 21       | Ttn         | 34.67 | 33.31  | 2.40  | 1.54  |      | 1.84  | 25.26 |      |      |      |       |      |      | 0.98 |       |       |      |      |       |     |      |      |     |       |       |       |      |      | 100   | 113          |
| S9     | 18   | 22       | Grt         | 40.05 |        | 21.36 | 27.54 | 2.40 | 5.94  | 2.72  |      |      |      |       |      |      |      |       |       |      |      |       |     |      |      |     |       |       |       |      |      | 100   | 111          |
| S9     | 18   | 23       | Grt         | 40.06 |        | 21.19 | 29.74 | 0.35 | 3.77  | 4.89  |      |      |      |       |      |      |      |       |       |      |      |       |     |      |      |     |       |       |       |      |      | 100   | 110          |
| S9     | 18   | 24       | Opx         | 57.72 |        | 1.86  | 15.46 | 0.36 | 20.95 | 3.35  | 0.29 |      |      |       |      |      |      |       |       |      |      |       |     |      |      |     |       |       |       |      |      | 100   | 110          |
| S9     | 18   | 25       | Cpx         | 54.56 | 0.34   | 1.19  | 9.16  | 0.34 | 15.11 | 19.32 |      |      |      |       |      |      |      |       |       |      |      |       |     |      |      |     |       |       |       |      |      | 100   | 109          |
| S9     | 18   | 26       | Chr         |       |        | 7.51  | 29.91 |      | 7.21  |       |      |      |      |       |      |      |      | 55.37 |       |      |      |       |     |      |      |     |       |       |       |      |      | 100   | 99           |
| S9     | 18   | 27       | Chr         |       |        | 22.33 | 16.35 |      | 13.81 |       |      |      |      |       |      |      |      | 47.50 |       |      |      |       |     |      |      |     |       |       |       |      |      | 100   | 110          |
| S9     | 18   | 28       | Dol         |       |        |       |       |      | 24.01 | 29.99 |      |      |      |       |      |      |      |       |       |      |      |       |     |      |      |     |       |       |       |      |      | 54    | 57           |
| S9     | 19   | 1        | Cpx         | 53.99 |        | 3.52  | 1.85  |      | 17.19 | 22.66 |      |      |      |       |      |      |      | 0.79  |       |      |      |       |     |      |      |     |       |       |       |      |      | 100   | 116          |
| S9     | 19   | 2        | Ol +        | 44.77 |        | 2.08  | 9.34  |      | 41.58 |       |      |      |      |       |      | 0.26 |      | 1.98  |       |      |      |       |     |      |      |     |       |       |       |      |      | 100   | 96           |
| S9     | 19   | 3        | Chl         | 27.98 |        | 17.60 | 23.79 | 0.34 | 15.29 |       |      |      |      |       |      |      |      |       |       |      | 0.58 |       |     |      |      |     |       |       |       |      |      | 85    | 99           |
| S9     | 19   | 4        | Ol          | 41.60 |        |       | 9.41  |      | 48.41 |       |      |      |      |       |      |      |      |       |       |      |      |       |     |      |      |     |       |       |       |      |      | 100   | 96           |
| S9     | 19   | 5        | Cpx         | 55.34 |        | 2.01  | 1.67  |      | 17.88 | 22.60 |      |      |      |       |      |      |      | 0.50  |       |      |      |       |     |      |      |     |       |       |       |      |      | 100   | 115          |
| S9     | 19   | 6        | Spl         |       |        | 42.33 | 14.57 |      | 17.20 |       |      |      |      |       |      |      | 0.34 | 25.56 |       |      |      |       |     |      |      |     |       |       |       |      |      | 100   | 108          |
| S9     | 19   | 7        | Feohy +     | 7.22  | 3.00   | 2.48  | 86.23 |      |       |       |      | 1.07 |      |       |      |      |      |       |       |      |      |       |     |      |      |     |       |       |       |      |      | 100   | 88           |
| S9     | 19   | 8        | "Mag" +     | 4.95  |        | 0.80  | 93.79 |      |       | 0.45  |      |      |      |       |      |      |      |       |       |      |      |       |     |      |      |     |       |       |       |      |      | 100   | 75           |
| S9     | 19   | 9        | Chr         |       |        | 20.34 | 16.79 |      | 13.00 |       |      |      |      |       |      |      | 0.38 | 49.48 |       |      |      |       |     |      |      |     |       |       |       |      |      | 100   | 107          |
| S9     | 19   | 10       | "Ilm" +     | 3.54  | 13.37  | 5.23  | 73.46 | 2.66 |       |       |      |      |      |       |      |      | 1.00 | 0.37  |       |      | 0.37 |       |     |      |      |     |       |       |       |      |      | 100   | 95           |
| S9     | 19   | 11       | Py          | 0.39  |        |       | 30.88 |      |       |       |      |      |      | 68.73 |      |      |      |       |       |      |      |       |     |      |      |     |       |       |       |      |      | 100   | 212          |
| S9     | 19   | 12       | Ol          | 41.75 |        |       | 8.38  |      | 49.47 |       |      |      |      |       |      |      |      |       |       | 0.40 |      |       |     |      |      |     |       |       |       |      |      | 100   | 117          |
| S9     | 19   | 13       | Cpx         | 54.73 |        | 2.71  | 1.75  |      | 17.77 | 22.27 |      |      |      |       |      |      |      | 0.77  |       |      |      |       |     |      |      |     |       |       |       |      |      | 100   | 115          |
| S9     | 19   | 14       | Mix         | 48.29 | 2.19   | 14.25 | 12.56 | 0.30 | 9.50  | 10.21 | 0.55 | 2.15 |      |       |      |      |      |       |       |      |      |       |     |      |      |     |       |       |       |      |      | 100   | 106          |
| S9     | 19   | 15       | Chr         |       |        | 27.64 | 21.97 |      | 11.76 |       |      |      |      |       |      |      |      | 38.64 |       |      |      |       |     |      |      |     |       |       |       |      |      | 100   | 104          |
| S9     | 19   | 16       | "Ilm" +     | 15.15 | 22.13  | 5.53  | 50.49 | 0.66 | 3.24  | 0.45  | 1.07 | 0.35 |      |       |      |      | 0.92 |       |       |      |      |       |     |      |      |     |       |       |       |      |      | 100   | 93           |
| S9     | 19   | 17       | Spl +       | 2.96  |        | 34.00 | 15.80 |      | 16.06 |       |      |      |      |       |      |      |      | 31.17 |       |      |      |       |     |      |      |     |       |       |       |      |      | 100   | 104          |
| S9     | 19   | 18       | Chl         | 33.92 |        | 14.03 | 2.18  |      | 31.96 | 0.19  |      |      |      |       | 2.25 |      |      | 0.48  |       |      |      |       |     |      |      |     |       |       |       |      |      | 85    | 96           |
| S9     | 19   | 19       | Chr +       | 2.52  | 0.65   |       | 66.68 | 1.10 | 2.37  |       |      |      |      |       |      |      |      | 26.25 |       | 0.43 |      |       |     |      |      |     |       |       |       |      |      | 100   | 97           |
| S9     | 19   | 20       | Mix         | 16.02 | 70.60  | 0.84  | 0.85  |      | 0.64  | 11.05 |      |      |      |       |      |      |      |       |       |      |      |       |     |      |      |     |       |       |       |      |      | 100   | 106          |
| S9     | 19   | 21       | Spl         |       |        | 39.59 | 17.63 |      | 15.58 |       |      |      |      |       |      |      |      | 0.33  | 26.86 |      |      |       |     |      |      |     |       |       |       |      |      | 100   | 102          |
| S9     | 19   | 22       | Chr         |       |        | 18.14 | 17.13 |      | 12.57 |       |      |      |      |       |      |      |      | 52.16 |       |      |      |       |     |      |      |     |       |       |       |      |      | 100   | 106          |
| S9     | 19   | 23       | Grt         | 40.13 |        | 20.91 | 28.19 | 1.31 | 1.78  | 7.68  |      |      |      |       |      |      |      |       |       |      |      |       |     |      |      |     |       |       |       |      |      | 100   | 109          |
| S9     | 19   | 24       | TiO2 + ?Grt | 10.31 | 0.54   | 7.61  | 65.88 | 4.39 | 0.79  | 1.18  | 1.40 |      |      |       |      |      |      |       |       |      |      |       |     |      |      |     |       |       |       |      | 7.90 | 100   | 80           |
| S9     | 19   | 25       | TiO2        |       | 100.00 |       |       |      |       |       |      |      |      |       |      |      |      |       |       |      |      |       |     |      |      |     |       |       |       |      |      | 100   | 106          |
| S9     | 19   | 26       | Chr         |       |        | 7.96  | 22.07 |      | 8.30  |       |      |      |      |       |      |      |      | 61.68 |       |      |      |       |     |      |      |     |       |       |       |      |      | 100   | 106          |
| S9     | 19   | 27       | Chl         | 25.59 |        | 21.68 | 24.78 |      | 12.64 |       | 0.31 |      |      |       |      |      |      |       |       |      |      |       |     |      |      |     |       |       |       |      |      | 85    | 103          |
| S9     | 19   | 28       | Spl         |       |        | 40.77 | 15.65 |      | 17.32 |       |      |      |      |       |      |      |      | 26.26 |       |      |      |       |     |      |      |     |       |       |       |      |      | 100   | 115          |
| S9     | 19   | 29       | Chr         |       |        | 21.92 | 17.83 |      | 12.33 |       |      |      |      |       |      |      |      | 47.91 |       |      |      |       |     |      |      |     |       |       |       |      |      | 100   | 114          |
| S9     | 19   | 30       | Bt          | 38.75 | 4.06   | 17.82 | 18.90 |      | 9.56  |       | 0.32 | 6.60 |      |       |      |      |      |       |       |      |      |       |     |      |      |     |       |       |       |      |      | 96    | 108          |
| S9     | 19   | 31       | Ol          | 46.35 |        | 0.60  | 10.45 |      | 40.56 |       |      |      |      |       |      |      |      | 2.04  |       |      |      |       |     |      |      |     |       |       |       |      |      | 100   | 100          |
| S9     | 19   | 32       | Mix         | 29.77 |        | 2.49  | 30.30 |      | 31.24 |       |      |      |      |       |      |      |      | 6.20  |       |      |      |       |     |      |      |     |       |       |       |      |      | 100   | 111          |
| S9     | 19   | 33       | Chr         |       |        | 23.35 | 24.45 |      | 12.28 |       |      |      |      |       |      |      |      | 39.92 |       |      |      |       |     |      |      |     |       |       |       |      |      | 100   | 107          |
| S9     | 19   | 34       | Mag +       | 4.66  | 0.48   | 1.05  | 90.30 |      | 1.97  |       |      |      |      |       |      |      |      | 1.55  |       |      |      |       |     |      |      |     |       |       |       |      |      | 100   | 90           |

Table B4.2: EDS analyses of sample S9.

| Sample | Site | Position | Mineral  | SiO2  | TiO2  | Al2O3 | FeO   | MnO  | MgO   | CaO   | Na2O  | K2O  | P2O5 | SO3   | F    | Cl | V2O5 | Cr2O3 | CoO | NiO  | ZnO  | As2O3 | SrO | ZrO2 | Ag2O | BaO | La2O3 | Ce2O3 | Nd2O3 | HfO2 | WO3  | Total | Actual Total |
|--------|------|----------|----------|-------|-------|-------|-------|------|-------|-------|-------|------|------|-------|------|----|------|-------|-----|------|------|-------|-----|------|------|-----|-------|-------|-------|------|------|-------|--------------|
| S9     | 19   | 35       | Cpx      | 54.40 | 0.30  | 2.33  | 5.04  |      | 16.10 | 21.22 | 0.29  |      |      |       |      |    |      | 0.32  |     |      |      |       |     |      |      |     |       |       |       |      |      | 100   | 109          |
| S9     | 19   | 36       | Ill      | 49.48 |       | 39.12 | 0.58  |      | 0.41  |       | 7.66  | 0.95 |      |       | 1.80 |    |      |       |     |      |      |       |     |      |      |     |       |       |       |      |      | 100   | 110          |
| S9     | 19   | 37       | Ti-Mag   |       | 18.58 | 2.98  | 73.95 | 0.58 | 2.85  |       |       |      |      |       |      |    | 1.06 |       |     |      |      |       |     |      |      |     |       |       |       |      |      | 100   | 101          |
| S9     | 19   | 38       | Chr      |       |       | 9.38  | 17.35 |      | 12.51 |       |       |      |      |       |      |    |      | 60.75 |     |      |      |       |     |      |      |     |       |       |       |      |      | 100   | 109          |
| S9     | 20   | 1        | "Ol"     | 49.43 |       |       | 6.63  |      | 42.25 | 0.20  |       |      |      |       |      |    |      |       |     |      |      |       |     |      |      |     |       |       |       | 1.49 | 100  | 101   |              |
| S9     | 20   | 2        | Mix      | 40.31 |       | 1.00  | 22.53 |      | 8.77  | 27.39 |       |      |      |       |      |    |      |       |     |      |      |       |     |      |      |     |       |       |       |      |      | 100   | 108          |
| S9     | 20   | 3        | Ep       | 40.10 | 0.26  | 22.33 | 12.06 |      |       | 22.25 |       |      |      |       |      |    |      |       |     |      |      |       |     |      |      |     |       |       |       |      |      | 97    | 110          |
| S9     | 20   | 4        | Chr      |       |       | 5.52  | 22.44 |      | 7.51  |       |       |      |      |       |      |    | 0.36 | 64.16 |     |      |      |       |     |      |      |     |       |       |       |      |      | 100   | 109          |
| S9     | 20   | 5        | Ads +    | 53.38 | 1.82  | 14.40 | 10.82 |      | 7.05  | 7.22  | 5.31  |      |      |       |      |    |      |       |     |      |      |       |     |      |      |     |       |       |       |      |      | 100   | 112          |
| S9     | 20   | 6        | Ol       | 41.69 |       |       | 8.35  |      | 49.66 |       |       |      |      |       |      |    |      |       |     | 0.30 |      |       |     |      |      |     |       |       |       |      |      | 100   | 112          |
| S9     | 20   | 7        | Ep       | 40.59 |       | 26.60 | 6.68  |      |       | 22.52 |       |      |      |       |      |    |      | 0.60  |     |      |      |       |     |      |      |     |       |       |       |      |      | 97    | 106          |
| S9     | 20   | 8        | Chr      |       |       | 13.42 | 17.89 |      | 11.95 |       |       |      |      |       |      |    | 0.44 | 56.31 |     |      |      |       |     |      |      |     |       |       |       |      |      | 100   | 103          |
| S9     | 20   | 9        | Ol       | 41.55 |       |       | 8.03  |      | 50.01 |       |       |      |      |       |      |    |      |       |     | 0.41 |      |       |     |      |      |     |       |       |       |      |      | 100   | 116          |
| S9     | 20   | 10       | Opx      | 55.94 |       | 3.77  | 5.35  |      | 32.86 | 1.38  |       |      |      |       |      |    |      | 0.70  |     |      |      |       |     |      |      |     |       |       |       |      |      | 100   | 118          |
| S9     | 20   | 11       | Grt      | 41.84 |       | 22.11 | 16.48 | 0.46 | 11.41 | 7.45  |       |      |      |       |      |    |      | 0.25  |     |      |      |       |     |      |      |     |       |       |       |      |      | 100   | 114          |
| S9     | 20   | 12       | Ti-Mag + | 6.49  | 4.55  | 1.14  | 79.02 |      | 1.19  | 3.71  |       |      |      |       |      |    | 1.66 | 2.24  |     |      |      |       |     |      |      |     |       |       |       |      |      | 100   | 97           |
| S9     | 20   | 13       | Chr      |       | 0.50  | 20.47 | 26.36 |      | 10.79 |       |       |      |      |       |      |    |      | 41.88 |     |      |      |       |     |      |      |     |       |       |       |      |      | 100   | 115          |
| S9     | 20   | 14       | Ttn      | 43.31 | 29.92 | 1.59  | 0.91  |      |       | 23.52 |       |      |      |       |      |    | 0.75 |       |     |      |      |       |     |      |      |     |       |       |       |      |      | 100   | 115          |
| S9     | 20   | 15       | Mix      | 73.37 | 12.25 | 2.02  | 1.03  |      |       | 11.34 |       |      |      |       |      |    |      |       |     |      |      |       |     |      |      |     |       |       |       |      |      | 100   | 122          |
| S9     | 20   | 16       | Chl      | 26.82 | 0.54  | 19.12 | 24.32 | 0.36 | 13.85 |       |       |      |      |       |      |    |      |       |     |      |      |       |     |      |      |     |       |       |       |      |      | 85    | 98           |
| S9     | 20   | 17       | Chr      |       |       | 14.32 | 20.26 |      | 10.64 |       |       |      |      |       |      |    |      | 54.78 |     |      |      |       |     |      |      |     |       |       |       |      |      | 100   | 106          |
| S9     | 20   | 18       | Ol       | 46.87 |       |       | 5.73  |      | 43.10 | 0.24  |       |      |      |       |      |    |      | 0.59  |     |      |      |       |     |      |      |     |       |       |       |      | 3.47 | 100   | 99           |
| S9     | 20   | 19       | Chr      |       |       | 23.74 | 19.37 |      | 12.27 |       |       |      |      |       |      |    | 0.46 | 44.15 |     |      |      |       |     |      |      |     |       |       |       |      |      | 100   | 108          |
| S9     | 20   | 20       | Py +     | 9.71  |       | 3.85  | 62.41 |      | 4.17  | 0.57  |       |      |      | 16.04 |      |    |      | 0.50  |     |      |      |       |     |      |      |     |       |       |       |      | 2.75 | 100   | 97           |
| S9     | 20   | 21       | Chr      |       |       | 10.26 | 25.13 |      | 8.92  |       |       |      |      |       |      |    |      | 55.69 |     |      |      |       |     |      |      |     |       |       |       |      |      | 100   | 107          |
| S9     | 20   | 22       | Plag +   | 56.29 | 0.67  | 15.81 | 8.65  | 0.29 | 3.94  | 9.21  | 5.15  |      |      |       |      |    |      |       |     |      |      |       |     |      |      |     |       |       |       |      |      | 100   | 119          |
| S9     | 20   | 23       | "Ilm" +  | 7.41  | 60.78 | 1.37  | 19.24 | 2.90 | 4.83  | 0.42  |       |      |      |       | 3.04 |    |      |       |     |      |      |       |     |      |      |     |       |       |       |      |      | 100   | 114          |
| S9     | 20   | 24       | Ol       | 41.95 |       |       | 7.00  |      | 50.63 |       |       |      |      |       |      |    |      |       |     | 0.42 |      |       |     |      |      |     |       |       |       |      |      | 100   | 123          |
| S9     | 20   | 25       | Chr      | 5.09  | 0.55  | 2.97  | 50.49 | 3.76 | 4.73  |       |       |      |      |       |      |    |      | 31.61 |     |      | 0.80 |       |     |      |      |     |       |       |       |      |      | 100   | 104          |
| S9     | 20   | 26       | Grt      | 39.73 |       | 20.81 | 29.69 | 2.01 | 3.76  | 3.73  |       |      |      |       |      |    |      | 0.28  |     |      |      |       |     |      |      |     |       |       |       |      |      | 100   | 115          |
| S9     | 20   | 27       | Chl      | 26.55 |       | 21.12 | 21.74 |      | 15.59 |       |       |      |      |       |      |    |      |       |     |      |      |       |     |      |      |     |       |       |       |      |      | 85    | 93           |
| S9     | 20   | 28       | Ol       | 41.95 |       |       | 8.31  |      | 49.36 |       |       |      |      |       |      |    |      |       |     | 0.38 |      |       |     |      |      |     |       |       |       |      |      | 100   | 110          |
| S9     | 20   | 29       | Grt      | 40.00 |       | 20.93 | 28.00 |      | 1.05  | 10.01 |       |      |      |       |      |    |      |       |     |      |      |       |     |      |      |     |       |       |       |      |      | 100   | 108          |
| S9     | 20   | 30       | Cpx      | 54.55 |       | 2.86  | 1.82  |      | 17.16 | 22.58 |       |      |      |       |      |    |      | 1.03  |     |      |      |       |     |      |      |     |       |       |       |      |      | 100   | 117          |
| S9     | 20   | 31       | Spl      |       |       | 35.17 | 17.98 |      | 15.10 |       |       |      |      |       |      |    | 0.33 | 31.42 |     |      |      |       |     |      |      |     |       |       |       |      |      | 100   | 111          |
| S9     | 21   | 1        | Chl +    | 34.81 | 0.92  | 13.04 | 9.60  | 0.66 | 20.32 | 3.10  |       |      |      |       | 2.56 |    |      |       |     |      |      |       |     |      |      |     |       |       |       |      |      | 85    | 95           |
| S9     | 21   | 2        | Ep       | 46.56 |       | 23.90 | 0.48  |      |       | 26.06 |       |      |      |       |      |    |      |       |     |      |      |       |     |      |      |     |       |       |       |      |      | 97    | 108          |
| S9     | 21   | 3        | Chr      |       |       | 9.27  | 20.89 |      | 9.48  |       |       |      |      |       |      |    |      | 60.36 |     |      |      |       |     |      |      |     |       |       |       |      |      | 100   | 106          |
| S9     | 21   | 4        | Ol       | 41.80 |       |       | 7.89  |      | 49.95 |       |       |      |      |       |      |    |      |       |     | 0.36 |      |       |     |      |      |     |       |       |       |      |      | 100   | 114          |
| S9     | 21   | 5        | Chr      |       |       | 10.30 | 22.19 |      | 9.51  |       |       |      |      |       |      |    |      | 58.00 |     |      |      |       |     |      |      |     |       |       |       |      |      | 100   | 104          |
| S9     | 21   | 6        | Mix      | 48.74 | 2.39  | 5.18  | 14.75 | 0.39 | 12.18 | 15.41 | 0.60  |      |      |       |      |    | 0.36 |       |     |      |      |       |     |      |      |     |       |       |       |      |      | 100   | 115          |
| S9     | 21   | 7        | Chr      |       |       | 16.98 | 17.31 |      | 12.31 |       |       |      |      |       |      |    |      | 53.40 |     |      |      |       |     |      |      |     |       |       |       |      |      | 100   | 103          |
| S9     | 21   | 8        | Amph     | 43.80 | 1.82  | 10.45 | 17.17 | 0.31 | 12.51 | 10.41 | 0.53  |      |      |       |      |    |      |       |     |      |      |       |     |      |      |     |       |       |       |      | 97   | 106   |              |
| S9     | 21   | 9        | Mix      | 44.30 | 3.80  | 12.36 | 17.69 | 0.35 | 10.45 | 9.05  | 1.61  | 0.38 |      |       |      |    |      |       |     |      |      |       |     |      |      |     |       |       |       |      | 100  | 102   |              |
| S9     | 21   | 10       | "Ti-Mag" |       | 16.98 |       | 83.02 |      |       |       |       |      |      |       |      |    |      |       |     |      |      |       |     |      |      |     |       |       |       |      |      | 100   | 89           |
| S9     | 21   | 11       | Ab       | 65.93 |       | 19.32 | 1.79  |      | 0.90  | 0.91  | 10.75 | 0.40 |      |       |      |    |      |       |     |      |      |       |     |      |      |     |       |       |       |      |      | 100   | 112          |
| S9     | 21   | 12       | Py       | 3.77  |       | 1.10  | 30.14 |      | 2.39  |       |       |      |      | 62.60 |      |    |      |       |     |      |      |       |     |      |      |     |       |       |       |      |      | 100   | 180          |
| S9     | 21   | 13       | Dol      |       |       |       |       |      | 22.76 | 31.24 |       |      |      |       |      |    |      |       |     |      |      |       |     |      |      |     |       |       |       |      |      | 54    | 56           |

Table B4.2: EDS analyses of sample S9.

| Sample | Site | Position | Mineral | SiO2   | TiO2  | Al2O3 | FeO   | MnO  | MgO   | CaO   | Na2O  | K2O  | P2O5  | SO3   | F    | Cl | V2O5 | Cr2O3 | CoO | NiO  | ZnO  | As2O3 | SrO | ZrO2  | Ag2O | BaO | La2O3 | Ce2O3 | Nd2O3 | HfO2 | WO3  | Total | Actual Total |
|--------|------|----------|---------|--------|-------|-------|-------|------|-------|-------|-------|------|-------|-------|------|----|------|-------|-----|------|------|-------|-----|-------|------|-----|-------|-------|-------|------|------|-------|--------------|
| S9     | 21   | 14       | Grt     | 39.16  |       | 20.71 | 29.95 | 4.58 | 1.49  | 4.12  |       |      |       |       |      |    |      |       |     |      |      |       |     |       |      |     |       |       |       |      |      | 100   | 111          |
| S9     | 21   | 15       | Opx     | 57.38  |       | 2.42  | 5.60  |      | 33.77 | 0.37  |       |      |       |       |      |    |      | 0.46  |     |      |      |       |     |       |      |     |       |       |       |      |      | 100   | 118          |
| S9     | 21   | 16       | Amph    | 46.07  | 0.99  | 6.46  | 17.43 |      | 12.01 | 12.12 | 1.93  |      |       |       |      |    |      |       |     |      |      |       |     |       |      |     |       |       |       |      |      | 97    | 86           |
| S9     | 21   | 17       | Mix     | 41.61  | 12.34 | 7.99  | 11.67 |      | 5.98  | 17.66 | 0.61  |      |       |       | 2.15 |    |      |       |     |      |      |       |     |       |      |     |       |       |       |      |      | 100   | 115          |
| S9     | 21   | 18       | Chr     |        |       | 27.52 | 17.98 |      | 13.65 |       |       |      |       |       |      |    | 0.36 | 40.48 |     |      |      |       |     |       |      |     |       |       |       |      |      | 100   | 115          |
| S9     | 21   | 19       | Ol      | 41.86  |       |       | 8.50  |      | 49.36 |       |       |      |       |       |      |    |      |       |     | 0.28 |      |       |     |       |      |     |       |       |       |      |      | 100   | 121          |
| S9     | 21   | 20       | Grt     | 39.65  |       | 20.71 | 21.09 | 7.46 | 0.62  | 10.05 |       |      |       |       |      |    |      | 0.43  |     |      |      |       |     |       |      |     |       |       |       |      |      | 100   | 118          |
| S9     | 21   | 21       | Chr     |        |       | 10.66 | 19.10 |      | 10.68 |       |       |      |       |       |      |    |      | 59.56 |     |      |      |       |     |       |      |     |       |       |       |      |      | 100   | 110          |
| S9     | 21   | 22       | Mag +   | 1.76   |       |       | 96.31 |      | 0.57  |       |       |      |       |       |      |    |      | 1.36  |     |      |      |       |     |       |      |     |       |       |       |      |      | 100   | 98           |
| S9     | 21   | 23       | Chr +   | 7.51   |       | 1.05  | 39.38 | 0.58 | 34.55 | 0.29  |       |      |       |       |      |    |      | 16.64 |     |      |      |       |     |       |      |     |       |       |       |      |      | 100   | 97           |
| S9     | 21   | 24       | Ab      | 67.85  |       | 19.61 | 0.22  |      |       | 1.23  | 11.09 |      |       |       |      |    |      |       |     |      |      |       |     |       |      |     |       |       |       |      |      | 100   | 119          |
| S9     | 21   | 25       | Py +    | 3.58   |       | 1.46  | 26.37 | 0.49 | 2.94  | 0.19  | 0.45  |      |       | 64.52 |      |    |      |       |     |      |      |       |     |       |      |     |       |       |       |      |      | 100   | 209          |
| S9     | 21   | 26       | Chl     | 26.36  |       | 21.04 | 26.43 | 0.93 | 9.71  |       | 0.39  | 0.15 |       |       |      |    |      |       |     |      |      |       |     |       |      |     |       |       |       |      |      | 85    | 102          |
| S9     | 21   | 27       | Ol      | 42.06  |       |       | 7.19  |      | 50.36 |       |       |      |       |       |      |    |      |       |     | 0.38 |      |       |     |       |      |     |       |       |       |      |      | 100   | 120          |
| S9     | 21   | 28       | Ep      | 40.35  |       | 26.02 | 8.56  |      |       | 22.08 |       |      |       |       |      |    |      |       |     |      |      |       |     |       |      |     |       |       |       |      |      | 97    | 111          |
| S9     | 21   | 29       | Ab      | 68.72  |       | 18.99 | 0.22  |      |       | 0.42  | 11.64 |      |       |       |      |    |      |       |     |      |      |       |     |       |      |     |       |       |       |      |      | 100   | 116          |
| S9     | 21   | 30       | Chr     |        |       | 17.68 | 16.22 |      | 13.38 |       |       |      |       |       |      |    |      | 52.72 |     |      |      |       |     |       |      |     |       |       |       |      |      | 100   | 107          |
| S9     | 21   | 31       | Qz      | 100.00 |       |       |       |      |       |       |       |      |       |       |      |    |      |       |     |      |      |       |     |       |      |     |       |       |       |      |      | 100   | 123          |
| S9     | 21   | 32       | Ol      | 40.93  |       |       | 9.14  | 0.96 | 46.34 |       |       |      |       |       | 2.19 |    |      |       |     | 0.43 |      |       |     |       |      |     |       |       |       |      |      | 100   | 106          |
| S9     | 21   | 33       | Ttn +   | 29.81  | 41.73 | 1.96  | 1.81  |      | 0.57  | 24.12 |       |      |       |       |      |    |      |       |     |      | 0.36 |       |     |       |      |     |       |       |       |      |      | 100   | 106          |
| S9     | 21   | 34       | Ol      | 42.06  |       |       | 7.00  |      | 50.58 |       |       |      |       |       |      |    |      |       |     | 0.36 |      |       |     |       |      |     |       |       |       |      |      | 100   | 115          |
| S9     | 21   | 35       | Opx     | 56.18  |       |       | 6.67  | 0.21 | 36.94 |       |       |      |       |       |      |    |      |       |     |      |      |       |     |       |      |     |       |       |       |      |      | 100   | 122          |
| S9     | 21   | 36       | Spl     |        |       | 40.52 | 15.01 |      | 16.67 |       |       |      |       |       |      |    |      | 27.81 |     |      |      |       |     |       |      |     |       |       |       |      |      | 100   | 106          |
| S9     | 21   | 37       | Mix     | 45.97  |       | 14.26 | 12.68 |      | 20.19 | 1.20  | 0.79  | 0.68 |       |       | 3.50 |    |      | 0.74  |     |      |      |       |     |       |      |     |       |       |       |      |      | 100   | 102          |
| S9     | 22   | 1        | Spl     |        | 0.55  | 27.28 | 21.23 |      | 14.23 |       |       |      |       |       |      |    |      | 36.71 |     |      |      |       |     |       |      |     |       |       |       |      |      | 100   | 104          |
| S9     | 22   | 2        | Chr     |        |       | 18.51 | 17.17 |      | 12.38 |       |       |      |       |       |      |    | 0.41 | 51.54 |     |      |      |       |     |       |      |     |       |       |       |      |      | 100   | 96           |
| S9     | 22   | 3        | Grt     | 40.23  |       | 21.30 | 27.77 | 0.53 | 3.42  | 6.75  |       |      |       |       |      |    |      |       |     |      |      |       |     |       |      |     |       |       |       |      |      | 100   | 108          |
| S9     | 22   | 4        | Cpx     | 54.14  | 0.55  | 3.95  | 8.78  |      | 16.93 | 15.28 | 0.37  |      |       |       |      |    |      |       |     |      |      |       |     |       |      |     |       |       |       |      |      | 100   | 88           |
| S9     | 22   | 5        | Ol      | 41.94  |       |       | 8.46  |      | 49.60 |       |       |      |       |       |      |    |      |       |     |      |      |       |     |       |      |     |       |       |       |      |      | 100   | 110          |
| S9     | 22   | 6        | Ol      | 42.06  |       |       | 8.09  |      | 49.57 |       |       |      |       |       |      |    |      |       |     | 0.28 |      |       |     |       |      |     |       |       |       |      |      | 100   | 114          |
| S9     | 22   | 7        | Cpx     | 51.43  | 0.87  | 5.26  | 7.06  |      | 15.23 | 19.85 | 0.28  |      |       |       |      |    |      |       |     |      |      |       |     |       |      |     |       |       |       |      |      | 100   | 113          |
| S9     | 22   | 8        | Spl     |        |       | 33.56 | 20.83 |      | 13.60 |       |       |      |       |       |      |    | 0.38 | 31.63 |     |      |      |       |     |       |      |     |       |       |       |      |      | 100   | 108          |
| S9     | 22   | 9        | Spl +   |        | 1.82  | 15.86 | 37.52 | 0.82 | 6.00  |       |       |      |       |       |      |    | 0.51 | 37.47 |     |      |      |       |     |       |      |     |       |       |       |      |      | 100   | 107          |
| S9     | 22   | 10       | Cpx     | 55.10  |       | 2.06  | 1.84  |      | 17.66 | 22.85 |       |      |       |       |      |    |      | 0.49  |     |      |      |       |     |       |      |     |       |       |       |      |      | 100   | 118          |
| S9     | 22   | 11       | Chr     |        |       | 15.98 | 20.86 |      | 11.13 |       |       |      |       |       |      |    | 0.46 | 51.57 |     |      |      |       |     |       |      |     |       |       |       |      |      | 100   | 108          |
| S9     | 22   | 12       | Ol      | 41.65  |       |       | 8.37  | 0.24 | 49.34 |       |       |      |       |       |      |    |      |       |     | 0.40 |      |       |     |       |      |     |       |       |       |      |      | 100   | 119          |
| S9     | 22   | 13       | Zrn     | 31.25  |       |       |       |      |       |       |       |      |       |       |      |    |      |       |     |      |      |       |     | 67.11 |      |     |       |       | 1.64  |      | 100  | 122   |              |
| S9     | 22   | 14       | Dol     |        |       |       | 0.27  |      | 22.62 | 31.11 |       |      |       |       |      |    |      |       |     |      |      |       |     |       |      |     |       |       |       |      |      | 54    | 53           |
| S9     | 22   | 15       | Ol      | 41.69  |       |       | 7.42  | 0.23 | 50.30 |       |       |      |       |       |      |    |      |       |     | 0.36 |      |       |     |       |      |     |       |       |       |      |      | 100   | 113          |
| S9     | 22   | 16       | Ep      | 41.83  | 1.57  | 20.33 | 11.62 |      | 0.81  | 20.85 |       |      |       |       |      |    |      |       |     |      |      |       |     |       |      |     |       |       |       |      |      | 97    | 106          |
| S9     | 22   | 17       | Chr     |        |       | 18.44 | 25.45 |      | 10.16 |       |       |      |       |       |      |    |      | 45.96 |     |      |      |       |     |       |      |     |       |       |       |      |      | 100   | 112          |
| S9     | 22   | 18       | Mag     | 0.66   |       |       | 98.96 |      |       | 0.38  |       |      |       |       |      |    |      |       |     |      |      |       |     |       |      |     |       |       |       |      |      | 100   | 94           |
| S9     | 22   | 19       | Ol      | 42.14  |       |       | 7.38  |      | 50.07 |       |       |      |       |       |      |    |      |       |     | 0.41 |      |       |     |       |      |     |       |       |       |      |      | 100   | 121          |
| S9     | 22   | 20       | Ap      |        |       |       |       |      |       | 48.29 |       |      | 44.68 |       | 5.81 |    |      |       |     |      |      |       |     |       |      |     |       |       |       |      | 1.22 | 100   | 130          |
| S9     | 22   | 21       | Ol      | 42.08  |       |       | 8.45  |      | 49.12 |       |       |      |       |       |      |    |      |       |     | 0.36 |      |       |     |       |      |     |       |       |       |      |      | 100   | 120          |
| S9     | 22   | 22       | Cpx     | 52.30  | 1.73  | 3.30  | 6.74  |      | 14.62 | 20.77 | 0.54  |      |       |       |      |    |      |       |     |      |      |       |     |       |      |     |       |       |       |      |      | 100   | 115          |
| S9     | 22   | 23       | Dol     |        |       |       |       |      | 22.40 | 31.60 |       |      |       |       |      |    |      |       |     |      |      |       |     |       |      |     |       |       |       |      |      | 54    | 56           |
| S9     | 22   | 24       | Opx     | 57.83  |       | 1.80  | 5.65  |      | 34.34 | 0.37  |       |      |       |       |      |    |      |       |     |      |      |       |     |       |      |     |       |       |       |      |      | 100   | 115          |

Table B4.2: EDS analyses of sample S9.

| Sample | Site | Position | Mineral  | SiO2   | TiO2  | Al2O3 | FeO   | MnO  | MgO   | CaO   | Na2O | K2O  | P2O5 | SO3   | F     | Cl | V2O5 | Cr2O3 | CoO | NiO  | ZnO | As2O3 | SrO  | ZrO2  | Ag2O | BaO | La2O3 | Ce2O3 | Nd2O3 | HfO2 | WO3 | Total | Actual Total |
|--------|------|----------|----------|--------|-------|-------|-------|------|-------|-------|------|------|------|-------|-------|----|------|-------|-----|------|-----|-------|------|-------|------|-----|-------|-------|-------|------|-----|-------|--------------|
| S9     | 22   | 25       | Ads +    | 59.48  |       | 20.73 | 2.55  |      | 3.04  | 7.55  | 6.65 |      |      |       |       |    |      |       |     |      |     |       |      |       |      |     |       |       |       |      |     | 100   | 109          |
| S9     | 22   | 26       | Ti-Mag + | 15.61  | 2.54  | 5.10  | 68.25 | 0.40 | 5.93  | 1.71  | 0.48 |      |      |       |       |    |      |       |     |      |     |       |      |       |      |     |       |       |       |      |     | 100   | 93           |
| S9     | 22   | 27       | TiO2 +   | 48.49  | 42.45 | 5.48  | 1.86  |      | 0.52  | 0.32  |      | 0.88 |      |       |       |    |      |       |     |      |     |       |      |       |      |     |       |       |       |      |     | 100   | 109          |
| S9     | 22   | 28       | Qz       | 100.00 |       |       |       |      |       |       |      |      |      |       |       |    |      |       |     |      |     |       |      |       |      |     |       |       |       |      |     | 100   | 118          |
| S9     | 22   | 29       | Dol      |        |       |       |       |      | 16.17 | 35.91 |      |      |      |       | 1.92  |    |      |       |     |      |     |       |      |       |      |     |       |       |       |      |     | 54    | 44           |
| S9     | 22   | 30       | Hbl      | 44.53  | 2.05  | 8.02  | 19.44 | 0.46 | 11.78 | 10.24 | 0.48 |      |      |       |       |    |      |       |     |      |     |       |      |       |      |     |       |       |       |      |     | 97    | 110          |
| S9     | 22   | 31       | Ti-Mag   | 0.89   | 18.84 | 3.70  | 71.89 | 1.47 | 1.91  |       |      |      |      |       |       |    | 1.30 |       |     |      |     |       |      |       |      |     |       |       |       |      |     | 100   | 99           |
| S9     | 22   | 32       | Chr      |        | 0.58  | 16.87 | 23.10 |      | 11.37 |       |      |      |      |       |       |    |      | 48.08 |     |      |     |       |      |       |      |     |       |       |       |      |     | 100   | 113          |
| S9     | 22   | 33       | Ol       | 41.72  |       |       | 7.30  |      | 50.63 |       |      |      |      |       |       |    |      |       |     | 0.35 |     |       |      |       |      |     |       |       |       |      |     | 100   | 112          |
| S9     | 22   | 34       | Fl?      |        |       |       |       |      |       | 71.62 |      |      |      |       | 26.85 |    |      |       |     |      |     |       | 1.52 |       |      |     |       |       |       |      |     | 100   | 82           |
| S9     | 22   | 35       | Cpx      | 45.02  |       | 3.00  | 18.37 |      | 14.38 | 18.40 | 0.82 |      |      |       |       |    |      |       |     |      |     |       |      |       |      |     |       |       |       |      |     | 100   | 102          |
| S9     | 23   | 1        | Spl      |        |       | 38.20 | 15.90 |      | 16.33 |       |      |      |      |       |       |    | 0.36 | 29.21 |     |      |     |       |      |       |      |     |       |       |       |      |     | 100   | 107          |
| S9     | 23   | 2        | Ol       | 41.68  |       |       | 8.38  |      | 49.49 |       |      |      |      |       |       |    |      |       |     | 0.45 |     |       |      |       |      |     |       |       |       |      |     | 100   | 112          |
| S9     | 23   | 3        | Chr      |        | 0.93  | 20.86 | 26.34 |      | 10.34 |       |      |      |      |       |       |    | 0.46 | 41.08 |     |      |     |       |      |       |      |     |       |       |       |      |     | 100   | 105          |
| S9     | 23   | 4        | Cpx      | 53.06  | 0.98  | 3.20  | 7.20  |      | 15.81 | 19.48 | 0.28 |      |      |       |       |    |      |       |     |      |     |       |      |       |      |     |       |       |       |      |     | 100   | 112          |
| S9     | 23   | 5        | Dol      |        |       |       |       |      | 22.74 | 31.26 |      |      |      |       |       |    |      |       |     |      |     |       |      |       |      |     |       |       |       |      |     | 54    | 56           |
| S9     | 23   | 6        | Chr      |        | 0.34  | 28.24 | 19.32 |      | 13.89 |       |      |      |      |       |       |    |      | 38.21 |     |      |     |       |      |       |      |     |       |       |       |      |     | 100   | 110          |
| S9     | 23   | 7        | Grt      | 39.79  |       | 21.13 | 27.05 | 1.50 | 1.42  | 9.12  |      |      |      |       |       |    |      |       |     |      |     |       |      |       |      |     |       |       |       |      |     | 100   | 112          |
| S9     | 23   | 8        | Chl      | 28.39  | 0.69  | 16.93 | 23.31 | 0.26 | 14.36 | 0.71  | 0.35 |      |      |       |       |    |      |       |     |      |     |       |      |       |      |     |       |       |       |      |     | 85    | 98           |
| S9     | 23   | 9        | Zrn      | 30.81  |       |       |       |      |       |       |      |      |      |       |       |    |      |       |     |      |     |       |      | 67.66 |      |     |       |       |       | 1.53 |     | 100   | 119          |
| S9     | 23   | 10       | Chr +    | 3.13   |       | 1.09  | 67.40 | 1.53 | 2.61  |       |      |      |      |       |       |    |      | 24.24 |     |      |     |       |      |       |      |     |       |       |       |      |     | 100   | 101          |
| S9     | 23   | 11       | Chr +    | 3.42   | 0.58  | 1.13  | 67.74 | 0.89 | 3.70  |       |      |      |      |       |       |    |      | 22.54 |     |      |     |       |      |       |      |     |       |       |       |      |     | 100   | 104          |
| S9     | 23   | 12       | "Ol"     | 45.71  |       | 7.48  | 4.78  |      | 41.22 |       |      |      |      |       |       |    |      | 0.82  |     |      |     |       |      |       |      |     |       |       |       |      |     | 100   | 100          |
| S9     | 23   | 13       | Ol       | 42.12  |       |       | 7.35  |      | 50.16 |       |      |      |      |       |       |    |      |       |     | 0.37 |     |       |      |       |      |     |       |       |       |      |     | 100   | 124          |
| S9     | 23   | 14       | Ep       | 40.09  |       | 25.79 | 7.91  |      |       | 22.73 |      |      |      |       |       |    | 0.48 |       |     |      |     |       |      |       |      |     |       |       |       |      |     | 97    | 111          |
| S9     | 23   | 15       | Chr      |        |       | 13.42 | 23.71 |      | 8.96  |       |      |      |      |       |       |    | 0.42 | 53.49 |     |      |     |       |      |       |      |     |       |       |       |      |     | 100   | 110          |
| S9     | 23   | 16       | Chr      |        |       | 24.59 | 17.89 |      | 13.84 |       |      |      |      |       |       |    | 0.42 | 43.27 |     |      |     |       |      |       |      |     |       |       |       |      |     | 100   | 110          |
| S9     | 23   | 17       | Chr      |        |       | 11.69 | 26.49 |      | 9.52  |       |      |      |      |       |       |    |      | 52.29 |     |      |     |       |      |       |      |     |       |       |       |      |     | 100   | 106          |
| S9     | 23   | 18       | Ol       | 41.60  |       |       | 8.29  |      | 49.72 |       |      |      |      |       |       |    |      |       |     | 0.38 |     |       |      |       |      |     |       |       |       |      |     | 100   | 117          |
| S9     | 23   | 19       | Opx      | 57.56  |       | 1.61  | 5.83  |      | 34.35 | 0.39  |      |      |      |       |       |    |      | 0.25  |     |      |     |       |      |       |      |     |       |       |       |      |     | 100   | 115          |
| S9     | 23   | 20       | Dol      |        |       |       |       |      | 22.76 | 31.24 |      |      |      |       |       |    |      |       |     |      |     |       |      |       |      |     |       |       |       |      |     | 54    | 55           |
| S9     | 23   | 21       | Chr +    | 7.92   | 0.95  | 3.79  | 37.56 | 1.24 | 8.79  |       |      |      |      |       |       |    |      | 39.75 |     |      |     |       |      |       |      |     |       |       |       |      |     | 100   | 97           |
| S9     | 23   | 22       | Ti-Mag   |        | 10.36 | 3.24  | 83.35 | 0.60 | 1.22  |       |      |      |      |       |       |    | 1.22 |       |     |      |     |       |      |       |      |     |       |       |       |      |     | 100   | 93           |
| S9     | 23   | 23       | Py       | 0.87   |       |       | 34.40 |      |       |       |      |      |      | 64.73 |       |    |      |       |     |      |     |       |      |       |      |     |       |       |       |      |     | 100   | 182          |
| S9     | 23   | 24       | Ti-Mag   | 0.96   | 3.37  |       | 95.67 |      |       |       |      |      |      |       |       |    |      |       |     |      |     |       |      |       |      |     |       |       |       |      |     | 100   | 89           |
| S9     | 23   | 25       | Spl      |        |       | 32.78 | 14.56 |      | 15.69 |       |      |      |      |       |       |    | 0.34 | 36.63 |     |      |     |       |      |       |      |     |       |       |       |      |     | 100   | 109          |
| S9     | 23   | 26       | Cpx      | 49.91  | 1.12  | 5.13  | 9.58  | 0.48 | 11.36 | 21.89 | 0.53 |      |      |       |       |    |      |       |     |      |     |       |      |       |      |     |       |       |       |      |     | 100   | 112          |
| S9     | 23   | 27       | Ol       | 41.82  |       |       | 7.92  |      | 49.93 |       |      |      |      |       |       |    |      |       |     | 0.33 |     |       |      |       |      |     |       |       |       |      |     | 100   | 118          |
| S9     | 23   | 28       | Feohy +  | 7.97   |       | 0.93  | 82.51 |      |       | 0.61  | 0.63 |      |      | 7.34  |       |    |      |       |     |      |     |       |      |       |      |     |       |       |       |      |     | 100   | 87           |
| S9     | 23   | 29       | Act      | 55.45  | 0.37  | 2.78  | 7.72  |      | 18.68 | 11.66 | 0.34 |      |      |       |       |    |      |       |     |      |     |       |      |       |      |     |       |       |       |      |     | 97    | 114          |
| S9     | 23   | 30       | Ep       | 40.25  |       | 24.86 | 9.27  |      |       | 22.62 |      |      |      |       |       |    |      |       |     |      |     |       |      |       |      |     |       |       |       |      |     | 97    | 113          |
| S9     | 23   | 31       | Ep       | 38.97  |       | 20.00 | 14.27 | 5.63 | 0.31  | 17.82 |      |      |      |       |       |    |      |       |     |      |     |       |      |       |      |     |       |       |       |      |     | 97    | 117          |
| S9     | 23   | 32       | Ol       | 42.10  |       |       | 8.32  |      | 49.26 |       |      |      |      |       |       |    |      |       |     | 0.33 |     |       |      |       |      |     |       |       |       |      |     | 100   | 119          |
| S9     | 23   | 33       | Grt      | 37.78  |       | 0.41  | 27.05 |      | 0.90  | 33.86 |      |      |      |       |       |    |      |       |     |      |     |       |      |       |      |     |       |       |       |      |     | 100   | 103          |
| S9     | 23   | 34       | Ep       | 40.56  |       | 22.54 | 12.74 | 0.49 | 0.43  | 20.25 |      |      |      |       |       |    |      |       |     |      |     |       |      |       |      |     |       |       |       |      |     | 97    | 108          |
| S9     | 23   | 35       | Ab       | 63.58  |       | 19.60 | 1.97  |      | 2.61  |       | 9.01 | 3.24 |      |       |       |    |      |       |     |      |     |       |      |       |      |     |       |       |       |      |     | 100   | 119          |
| S9     | 24   | 1        | Opx      | 56.64  |       | 3.30  | 5.64  |      | 33.62 | 0.30  |      |      |      |       |       |    |      | 0.50  |     |      |     |       |      |       |      |     |       |       |       |      |     | 100   | 114          |
| S9     | 24   | 2        | Spl      |        |       | 44.11 | 14.61 |      | 17.44 |       |      |      |      |       |       |    |      | 23.84 |     |      |     |       |      |       |      |     |       |       |       |      |     | 100   | 113          |



Table B4.2: EDS analyses of sample S9.

| Sample | Site | Position | Mineral       | SiO2   | TiO2   | Al2O3 | FeO   | MnO  | MgO   | CaO   | Na2O | K2O  | P2O5 | SO3   | F    | Cl | V2O5 | Cr2O3 | CoO | NiO  | ZnO | As2O3 | SrO | ZrO2  | Ag2O | BaO | La2O3 | Ce2O3 | Nd2O3 | HfO2 | WO3  | Total | Actual Total |
|--------|------|----------|---------------|--------|--------|-------|-------|------|-------|-------|------|------|------|-------|------|----|------|-------|-----|------|-----|-------|-----|-------|------|-----|-------|-------|-------|------|------|-------|--------------|
| S9     | 24   | 3        | "Opx" or "Ol" | 50.02  |        | 2.93  | 7.39  |      | 38.81 | 0.48  |      |      |      |       |      |    |      | 0.38  |     |      |     |       |     |       |      |     |       |       |       |      |      | 100   | 101          |
| S9     | 24   | 4        | Zrn           | 31.13  |        |       |       |      |       |       |      |      |      |       |      |    |      |       |     |      |     |       |     | 68.87 |      |     |       |       |       |      |      | 100   | 112          |
| S9     | 24   | 5        | Mag +         | 1.17   |        |       | 97.87 |      | 0.96  |       |      |      |      |       |      |    |      |       |     |      |     |       |     |       |      |     |       |       |       |      |      | 100   | 90           |
| S9     | 24   | 6        | Py            | 0.76   |        |       | 32.92 |      |       |       |      |      |      | 66.33 |      |    |      |       |     |      |     |       |     |       |      |     |       |       |       |      |      | 100   | 201          |
| S9     | 24   | 7        | Spl           |        |        | 51.25 | 13.40 |      | 18.72 |       |      |      |      |       |      |    |      | 16.30 |     | 0.32 |     |       |     |       |      |     |       |       |       |      |      | 100   | 111          |
| S9     | 24   | 8        | Ol            | 42.02  |        |       | 7.51  |      | 50.15 |       |      |      |      |       |      |    |      |       |     | 0.32 |     |       |     |       |      |     |       |       |       |      |      | 100   | 113          |
| S9     | 24   | 9        | Qz            | 100.00 |        |       |       |      |       |       |      |      |      |       |      |    |      |       |     |      |     |       |     |       |      |     |       |       |       |      |      | 100   | 116          |
| S9     | 24   | 10       | Chr           |        |        | 7.72  | 24.51 |      | 8.35  |       |      |      |      |       |      |    |      | 59.42 |     |      |     |       |     |       |      |     |       |       |       |      |      | 100   | 107          |
| S9     | 24   | 11       | Spl           |        |        | 30.77 | 21.44 |      | 13.50 |       |      |      |      |       |      |    | 0.41 | 33.89 |     |      |     |       |     |       |      |     |       |       |       |      |      | 100   | 110          |
| S9     | 24   | 12       | Ttn           | 32.92  | 34.48  | 1.43  | 2.35  |      |       | 27.27 |      |      |      |       | 1.55 |    |      |       |     |      |     |       |     |       |      |     |       |       |       |      |      | 100   | 114          |
| S9     | 24   | 13       | Chr           |        |        | 13.89 | 18.73 |      | 11.56 |       |      |      |      |       |      |    | 0.34 | 55.48 |     |      |     |       |     |       |      |     |       |       |       |      |      | 100   | 115          |
| S9     | 24   | 14       | Ol            | 39.99  |        |       | 17.37 |      | 41.02 |       |      |      |      |       |      |    |      |       |     |      |     |       |     |       |      |     |       |       |       |      | 1.63 | 100   | 115          |
| S9     | 24   | 15       | Ol            | 41.91  |        |       | 7.76  |      | 50.02 |       |      |      |      |       |      |    |      |       |     | 0.32 |     |       |     |       |      |     |       |       |       |      |      | 100   | 120          |
| S9     | 24   | 16       | Ol            | 41.99  |        |       | 7.60  |      | 50.05 |       |      |      |      |       |      |    |      |       |     | 0.36 |     |       |     |       |      |     |       |       |       |      |      | 100   | 119          |
| S9     | 24   | 17       | Dol           |        |        |       |       |      | 22.97 | 31.03 |      |      |      |       |      |    |      |       |     |      |     |       |     |       |      |     |       |       |       |      |      | 54    | 56           |
| S9     | 24   | 18       | Chr           |        |        | 25.28 | 15.91 |      | 14.17 |       |      |      |      |       |      |    | 0.38 | 44.26 |     |      |     |       |     |       |      |     |       |       |       |      |      | 100   | 108          |
| S9     | 24   | 19       | Opx           | 57.33  |        | 2.19  | 5.55  |      | 34.14 | 0.37  |      |      |      |       |      |    |      | 0.41  |     |      |     |       |     |       |      |     |       |       |       |      |      | 100   | 115          |
| S9     | 24   | 20       | Mag           |        |        | 0.67  | 97.94 |      |       |       |      |      |      |       |      |    | 0.98 | 0.41  |     |      |     |       |     |       |      |     |       |       |       |      |      | 100   | 93           |
| S9     | 24   | 21       | Amph          | 45.75  | 1.54   | 10.39 | 12.82 |      | 15.14 | 9.51  | 1.59 |      |      |       |      |    |      | 0.25  |     |      |     |       |     |       |      |     |       |       |       |      |      | 97    | 107          |
| S9     | 24   | 22       | Ttn           | 34.63  | 21.36  | 9.41  | 10.33 |      | 6.88  | 17.39 |      |      |      |       |      |    |      |       |     |      |     |       |     |       |      |     |       |       |       |      |      | 100   | 103          |
| S9     | 24   | 23       | Ab            | 65.34  |        | 18.94 | 2.29  |      | 2.57  | 0.63  | 9.93 | 0.30 |      |       |      |    |      |       |     |      |     |       |     |       |      |     |       |       |       |      |      | 100   | 113          |
| S9     | 24   | 24       | Cpx           | 50.29  | 2.67   | 4.18  | 9.69  | 0.27 | 11.81 | 20.39 | 0.70 |      |      |       |      |    |      |       |     |      |     |       |     |       |      |     |       |       |       |      |      | 100   | 112          |
| S9     | 24   | 25       | Ol            | 41.86  |        |       | 7.13  | 0.27 | 50.38 |       |      |      |      |       |      |    |      |       |     | 0.36 |     |       |     |       |      |     |       |       |       |      |      | 100   | 117          |
| S9     | 24   | 26       | Chr           |        | 0.37   | 24.10 | 16.21 |      | 16.62 |       |      |      |      |       |      |    |      | 42.70 |     |      |     |       |     |       |      |     |       |       |       |      |      | 100   | 107          |
| S9     | 24   | 27       | Ttn           | 34.97  | 27.94  | 5.93  | 2.70  |      | 1.35  | 25.01 |      |      |      |       | 1.43 |    | 0.66 |       |     |      |     |       |     |       |      |     |       |       |       |      |      | 100   | 107          |
| S9     | 24   | 28       | Mag           | 0.53   | 0.81   | 1.02  | 91.68 |      |       |       |      |      |      |       |      |    | 2.36 | 3.60  |     |      |     |       |     |       |      |     |       |       |       |      |      | 100   | 92           |
| S9     | 24   | 29       | Zrn           | 31.11  |        |       |       |      |       |       |      |      |      |       |      |    |      |       |     |      |     |       |     | 67.35 |      |     |       |       |       | 1.53 | 100  | 123   |              |
| S9     | 24   | 30       | Dol           |        |        |       |       |      | 22.79 | 31.21 |      |      |      |       |      |    |      |       |     |      |     |       |     |       |      |     |       |       |       |      |      | 54    | 55           |
| S9     | 25   | 1        | TiO2          |        | 100.00 |       |       |      |       |       |      |      |      |       |      |    |      |       |     |      |     |       |     |       |      |     |       |       |       |      |      | 100   | 106          |
| S9     | 25   | 2        | Amph          | 44.19  | 2.38   | 8.97  | 18.20 | 0.24 | 11.83 | 10.14 | 1.06 |      |      |       |      |    |      |       |     |      |     |       |     |       |      |     |       |       |       |      |      | 97    | 110          |
| S9     | 25   | 3        | Py            | 0.82   |        |       | 29.42 |      | 0.40  | 0.17  |      |      |      | 68.72 |      |    |      |       |     |      |     | 0.48  |     |       |      |     |       |       |       |      |      | 100   | 205          |
| S9     | 25   | 4        | Ol            | 41.89  |        |       | 8.27  |      | 49.44 |       |      |      |      |       |      |    |      |       |     | 0.39 |     |       |     |       |      |     |       |       |       |      |      | 100   | 122          |
| S9     | 25   | 5        | Grt           | 39.86  |        | 20.71 | 29.15 | 0.42 | 1.46  | 8.40  |      |      |      |       |      |    |      |       |     |      |     |       |     |       |      |     |       |       |       |      |      | 100   | 116          |
| S9     | 25   | 6        | Py            |        |        |       | 28.99 |      |       |       |      |      |      | 71.01 |      |    |      |       |     |      |     |       |     |       |      |     |       |       |       |      |      | 100   | 210          |
| S9     | 25   | 7        | TiO2          |        | 99.56  |       | 0.44  |      |       |       |      |      |      |       |      |    |      |       |     |      |     |       |     |       |      |     |       |       |       |      |      | 100   | 104          |
| S9     | 25   | 8        | Qz            | 99.59  | 0.41   |       |       |      |       |       |      |      |      |       |      |    |      |       |     |      |     |       |     |       |      |     |       |       |       |      |      | 100   | 118          |
| S9     | 25   | 9        | Grt           | 39.55  |        | 21.33 | 32.68 | 1.14 | 3.93  | 1.38  |      |      |      |       |      |    |      |       |     |      |     |       |     |       |      |     |       |       |       |      |      | 100   | 109          |
| S9     | 25   | 10       | Ti-Mag        | 6.42   | 15.27  | 3.93  | 69.33 | 0.62 | 2.91  |       |      | 0.40 |      |       |      |    | 1.13 |       |     |      |     |       |     |       |      |     |       |       |       |      |      | 100   | 99           |
| S9     | 25   | 11       | Zrn           | 31.05  |        |       |       |      |       |       |      |      |      |       |      |    |      |       |     |      |     |       |     | 67.28 |      |     |       |       |       | 1.67 | 100  | 121   |              |
| S9     | 25   | 12       | Grt           | 37.51  |        | 1.31  | 25.11 |      | 3.52  | 32.55 |      |      |      |       |      |    |      |       |     |      |     |       |     |       |      |     |       |       |       |      |      | 100   | 105          |
| S9     | 25   | 13       | Ol            | 42.07  |        |       | 7.65  |      | 49.96 |       |      |      |      |       |      |    |      |       |     | 0.32 |     |       |     |       |      |     |       |       |       |      |      | 100   | 122          |
| S9     | 25   | 14       | Amph          | 41.21  | 3.78   | 9.69  | 19.36 | 0.32 | 10.98 | 10.61 | 0.49 |      | 0.55 |       |      |    |      |       |     |      |     |       |     |       |      |     |       |       |       |      |      | 97    | 113          |
| S9     | 25   | 15       | Chr           |        |        | 13.73 | 20.86 |      | 9.33  |       |      |      |      |       |      |    |      | 56.08 |     |      |     |       |     |       |      |     |       |       |       |      |      | 100   | 95           |
| S9     | 25   | 16       | Grt           | 39.85  |        | 20.94 | 29.17 | 1.38 | 3.18  | 5.49  |      |      |      |       |      |    |      |       |     |      |     |       |     |       |      |     |       |       |       |      |      | 100   | 118          |
| S9     | 25   | 17       | Cpx           | 53.97  | 0.73   | 1.61  | 8.93  | 0.30 | 14.01 | 20.01 | 0.44 |      |      |       |      |    |      |       |     |      |     |       |     |       |      |     |       |       |       |      |      | 100   | 120          |
| S9     | 25   | 18       | Chr           |        |        | 25.60 | 20.21 |      | 11.94 |       |      |      |      |       |      |    | 0.36 | 41.89 |     |      |     |       |     |       |      |     |       |       |       |      |      | 100   | 114          |
| S9     | 25   | 19       | Chr           |        |        | 7.51  | 20.71 |      | 9.46  |       |      |      |      |       |      |    |      | 62.31 |     |      |     |       |     |       |      |     |       |       |       |      |      | 100   | 111          |
| S9     | 25   | 20       | Grt           | 39.96  |        | 21.18 | 30.50 | 1.03 | 4.95  | 2.38  |      |      |      |       |      |    |      |       |     |      |     |       |     |       |      |     |       |       |       |      |      | 100   | 117          |

Table B4.2: EDS analyses of sample S9.

| Sample | Site | Position | Mineral     | SiO2   | TiO2  | Al2O3 | FeO   | MnO  | MgO   | CaO   | Na2O  | K2O  | P2O5 | SO3   | F    | Cl | V2O5 | Cr2O3 | CoO | NiO  | ZnO | As2O3 | SrO | ZrO2 | Ag2O | BaO | La2O3 | Ce2O3 | Nd2O3 | HfO2 | WO3 | Total | Actual Total |
|--------|------|----------|-------------|--------|-------|-------|-------|------|-------|-------|-------|------|------|-------|------|----|------|-------|-----|------|-----|-------|-----|------|------|-----|-------|-------|-------|------|-----|-------|--------------|
| S9     | 25   | 21       | Ep          | 41.49  |       | 22.89 | 7.93  |      | 2.31  | 22.38 |       |      |      |       |      |    |      |       |     |      |     |       |     |      |      |     |       |       |       |      |     | 97    | 107          |
| S9     | 25   | 22       | Spl         |        |       | 51.13 | 12.92 |      | 18.86 |       |       |      |      |       |      |    |      | 16.75 |     | 0.34 |     |       |     |      |      |     |       |       |       |      |     | 100   | 111          |
| S9     | 25   | 23       | Cpx         | 53.81  |       | 4.93  | 1.94  |      | 16.06 | 21.44 | 0.77  |      |      |       |      |    |      | 1.06  |     |      |     |       |     |      |      |     |       |       |       |      |     | 100   | 116          |
| S9     | 25   | 24       | Amph        | 46.31  | 1.16  | 10.17 | 15.75 | 0.40 | 11.15 | 10.03 | 1.67  | 0.37 |      |       |      |    |      |       |     |      |     |       |     |      |      |     |       |       |       |      |     | 97    | 110          |
| S9     | 25   | 25       | Ol          | 42.03  |       |       | 7.53  |      | 50.12 |       |       |      |      |       |      |    |      |       |     | 0.31 |     |       |     |      |      |     |       |       |       |      |     | 100   | 119          |
| S9     | 25   | 26       | Chr         |        |       | 25.20 | 15.88 |      | 13.92 |       |       |      |      |       |      |    |      | 44.99 |     |      |     |       |     |      |      |     |       |       |       |      |     | 100   | 110          |
| S9     | 25   | 27       | Qz          | 100.00 |       |       |       |      |       |       |       |      |      |       |      |    |      |       |     |      |     |       |     |      |      |     |       |       |       |      |     | 100   | 118          |
| S9     | 25   | 28       | Chr         |        | 0.51  | 17.29 | 32.33 |      | 7.96  |       |       |      |      |       |      |    |      | 41.91 |     |      |     |       |     |      |      |     |       |       |       |      |     | 100   | 103          |
| S9     | 25   | 29       | Chr +       | 23.76  | 0.34  | 11.05 | 14.41 |      | 26.36 |       |       |      |      |       | 2.34 |    | 0.38 | 21.35 |     |      |     |       |     |      |      |     |       |       |       |      |     | 100   | 94           |
| S9     | 25   | 30       | Chr         |        |       | 20.81 | 17.16 |      | 12.93 |       |       |      |      |       |      |    |      | 49.10 |     |      |     |       |     |      |      |     |       |       |       |      |     | 100   | 103          |
| S9     | 25   | 31       | Ol          | 42.04  |       |       | 7.31  |      | 50.37 |       |       |      |      |       |      |    |      |       |     | 0.28 |     |       |     |      |      |     |       |       |       |      |     | 100   | 110          |
| S9     | 25   | 32       | Ol          | 41.56  |       |       | 7.85  |      | 50.25 |       |       |      |      |       |      |    |      |       |     | 0.33 |     |       |     |      |      |     |       |       |       |      |     | 100   | 117          |
| S9     | 25   | 33       | Chl         | 25.40  |       | 17.98 | 35.51 | 0.67 | 5.43  |       |       |      |      |       |      |    |      |       |     |      |     |       |     |      |      |     |       |       |       |      |     | 85    | 97           |
| S9     | 25   | 34       | Ti-Mag      |        | 18.42 | 2.91  | 74.61 | 0.60 | 2.51  |       |       |      |      |       |      |    | 0.96 |       |     |      |     |       |     |      |      |     |       |       |       |      |     | 100   | 97           |
| S9     | 26   | 1        | Spl         |        |       | 36.16 | 17.97 |      | 15.59 |       |       |      |      |       |      |    | 0.44 | 29.84 |     |      |     |       |     |      |      |     |       |       |       |      |     | 100   | 105          |
| S9     | 26   | 2        | Cpx         | 53.91  | 0.34  | 3.43  | 4.46  |      | 17.10 | 19.33 | 0.52  |      |      |       |      |    |      | 0.89  |     |      |     |       |     |      |      |     |       |       |       |      |     | 100   | 111          |
| S9     | 26   | 3        | Ol          | 41.68  | 0.25  | 0.47  | 6.72  |      | 44.82 | 0.19  |       |      |      |       | 5.30 |    |      | 0.28  |     | 0.29 |     |       |     |      |      |     |       |       |       |      |     | 100   | 113          |
| S9     | 26   | 4        | Grt         | 39.96  |       | 21.20 | 26.98 | 0.70 | 1.66  | 9.51  |       |      |      |       |      |    |      |       |     |      |     |       |     |      |      |     |       |       |       |      |     | 100   | 108          |
| S9     | 26   | 5        | Chr         |        |       | 19.15 | 19.54 |      | 11.91 |       |       |      |      |       |      |    |      | 49.40 |     |      |     |       |     |      |      |     |       |       |       |      |     | 100   | 103          |
| S9     | 26   | 6        | Chr         | 0.59   |       | 14.58 | 18.40 |      | 11.97 |       |       |      |      |       |      |    |      | 54.46 |     |      |     |       |     |      |      |     |       |       |       |      |     | 100   | 103          |
| S9     | 26   | 7        | Chl +       | 32.31  |       | 12.45 | 24.89 | 0.27 | 13.33 | 1.20  | 0.37  | 0.18 |      |       |      |    |      |       |     |      |     |       |     |      |      |     |       |       |       |      | 85  | 87    |              |
| S9     | 26   | 8        | Kfs         | 58.94  |       | 26.48 | 1.01  |      |       | 1.79  | 6.12  | 4.62 |      |       | 1.04 |    |      |       |     |      |     |       |     |      |      |     |       |       |       |      |     | 100   | 110          |
| S9     | 26   | 9        | Ttn +       | 40.95  | 17.21 | 9.36  | 13.38 |      | 1.45  | 14.28 | 3.25  | 0.13 |      |       |      |    |      |       |     |      |     |       |     |      |      |     |       |       |       |      |     | 100   | 103          |
| S9     | 26   | 10       | Cpx         | 51.85  | 1.87  | 3.85  | 6.38  |      | 14.94 | 20.71 | 0.40  |      |      |       |      |    |      |       |     |      |     |       |     |      |      |     |       |       |       |      |     | 100   | 107          |
| S9     | 26   | 11       | Chr         |        |       | 10.98 | 22.96 |      | 9.44  |       |       |      |      |       |      |    |      | 56.61 |     |      |     |       |     |      |      |     |       |       |       |      |     | 100   | 105          |
| S9     | 26   | 12       | Chr         |        |       | 8.58  | 21.41 |      | 9.48  |       |       |      |      |       |      |    | 0.39 | 60.13 |     |      |     |       |     |      |      |     |       |       |       |      |     | 100   | 104          |
| S9     | 26   | 13       | Spl         |        | 0.50  | 27.68 | 28.56 |      | 11.28 |       |       |      |      |       |      |    |      | 31.97 |     |      |     |       |     |      |      |     |       |       |       |      |     | 100   | 103          |
| S9     | 26   | 14       | Py          | 0.21   |       |       | 28.45 |      |       |       |       |      |      | 71.35 |      |    |      |       |     |      |     |       |     |      |      |     |       |       |       |      |     | 100   | 229          |
| S9     | 26   | 15       | Chr         |        |       | 10.84 | 24.33 |      | 8.21  |       |       |      |      |       |      |    |      | 56.62 |     |      |     |       |     |      |      |     |       |       |       |      |     | 100   | 113          |
| S9     | 26   | 16       | Chr         |        |       | 21.54 | 17.35 |      | 13.20 |       |       |      |      |       |      |    | 0.44 | 47.47 |     |      |     |       |     |      |      |     |       |       |       |      |     | 100   | 114          |
| S9     | 26   | 17       | Ol          | 41.71  |       |       | 8.05  |      | 49.93 |       |       |      |      |       |      |    |      |       |     | 0.31 |     |       |     |      |      |     |       |       |       |      |     | 100   | 119          |
| S9     | 26   | 18       | Chr         |        |       | 19.65 | 20.84 |      | 11.58 |       |       |      |      |       |      |    | 0.42 | 47.52 |     |      |     |       |     |      |      |     |       |       |       |      |     | 100   | 110          |
| S9     | 26   | 19       | Cpx         | 54.39  |       | 2.87  | 2.12  |      | 17.25 | 22.46 |       |      |      |       |      |    |      | 0.91  |     |      |     |       |     |      |      |     |       |       |       |      |     | 100   | 118          |
| S9     | 26   | 20       | Grt         | 39.57  |       | 20.86 | 25.50 | 2.87 | 1.62  | 9.58  |       |      |      |       |      |    |      |       |     |      |     |       |     |      |      |     |       |       |       |      |     | 100   | 115          |
| S9     | 26   | 21       | Plag +      | 56.39  | 1.12  | 13.45 | 8.75  |      | 6.37  | 8.34  | 5.58  |      |      |       |      |    |      |       |     |      |     |       |     |      |      |     |       |       |       |      |     | 100   | 120          |
| S9     | 26   | 22       | Cpx         | 56.46  |       | 0.42  | 1.37  |      | 18.02 | 23.44 |       |      |      |       |      |    |      | 0.30  |     |      |     |       |     |      |      |     |       |       |       |      |     | 100   | 118          |
| S9     | 26   | 23       | Ol          | 41.75  |       |       | 8.09  |      | 49.83 |       |       |      |      |       |      |    |      |       |     | 0.32 |     |       |     |      |      |     |       |       |       |      |     | 100   | 118          |
| S9     | 26   | 24       | Spl         |        |       | 31.01 | 16.01 |      | 16.36 |       |       |      |      |       |      |    |      | 36.62 |     |      |     |       |     |      |      |     |       |       |       |      |     | 100   | 106          |
| S9     | 26   | 25       | Ol          | 42.15  |       |       | 8.06  |      | 49.79 |       |       |      |      |       |      |    |      |       |     |      |     |       |     |      |      |     |       |       |       |      |     | 100   | 114          |
| S9     | 26   | 26       | Ab          | 66.85  |       | 20.33 |       |      |       | 1.94  | 10.73 | 0.15 |      |       |      |    |      |       |     |      |     |       |     |      |      |     |       |       |       |      |     | 100   | 118          |
| S9     | 26   | 27       | Amph        | 43.63  | 0.71  | 10.98 | 19.19 | 0.42 | 8.40  | 10.95 | 1.47  | 1.25 |      |       |      |    |      |       |     |      |     |       |     |      |      |     |       |       |       |      | 97  | 103   |              |
| S9     | 26   | 28       | Ep + TiO2 + | 48.13  | 10.86 | 14.00 | 6.16  |      | 1.38  | 19.47 |       |      |      |       |      |    |      |       |     |      |     |       |     |      |      |     |       |       |       |      |     | 100   | 111          |
| S9     | 26   | 29       | Ep          | 46.75  |       | 23.40 | 1.47  |      | 0.80  | 24.58 |       |      |      |       |      |    |      |       |     |      |     |       |     |      |      |     |       |       |       |      |     | 97    | 105          |
| S9     | 26   | 30       | Ol          | 41.85  |       |       | 7.53  |      | 50.30 |       |       |      |      |       |      |    |      |       |     | 0.31 |     |       |     |      |      |     |       |       |       |      |     | 100   | 119          |
| S9     | 26   | 31       | Dol?        |        |       |       | 9.09  | 1.87 | 15.42 | 27.61 |       |      |      |       |      |    |      |       |     |      |     |       |     |      |      |     |       |       |       |      |     | 54    | 57           |
| S9     | 26   | 32       | Ol          | 41.88  |       |       | 8.27  |      | 49.50 |       |       |      |      |       |      |    |      |       |     | 0.34 |     |       |     |      |      |     |       |       |       |      |     | 100   | 110          |
| S9     | 26   | 33       | Ab          | 68.12  |       | 19.51 |       |      |       | 1.25  | 11.13 |      |      |       |      |    |      |       |     |      |     |       |     |      |      |     |       |       |       |      |     | 100   | 112          |
| S9     | 26   | 34       | Cpx         | 51.70  | 1.37  | 3.34  | 11.28 | 0.28 | 15.62 | 16.00 | 0.40  |      |      |       |      |    |      |       |     |      |     |       |     |      |      |     |       |       |       |      |     | 100   | 106          |

Table B4.2: EDS analyses of sample S9.

| Sample | Site | Position | Mineral      | SiO2   | TiO2  | Al2O3 | FeO   | MnO  | MgO   | CaO   | Na2O  | K2O  | P2O5  | SO3   | F     | Cl | V2O5 | Cr2O3 | CoO | NiO  | ZnO  | As2O3 | SrO | ZrO2  | Ag2O  | BaO | La2O3 | Ce2O3 | Nd2O3 | HfO2 | WO3 | Total | Actual Total |     |     |
|--------|------|----------|--------------|--------|-------|-------|-------|------|-------|-------|-------|------|-------|-------|-------|----|------|-------|-----|------|------|-------|-----|-------|-------|-----|-------|-------|-------|------|-----|-------|--------------|-----|-----|
| S9     | 26   | 35       | Qz           | 100.00 |       |       |       |      |       |       |       |      |       |       |       |    |      |       |     |      |      |       |     |       |       |     |       |       |       |      |     | 100   | 119          |     |     |
| S9     | 27   | 1        | Cpx          | 52.58  | 1.31  | 3.85  | 5.55  |      | 15.42 | 20.59 |       |      |       |       |       |    |      | 0.70  |     |      |      |       |     |       |       |     |       |       |       |      |     |       | 100          | 113 |     |
| S9     | 27   | 2        | Opx          | 58.38  |       | 0.71  | 5.24  |      | 35.11 | 0.31  |       |      |       |       |       |    |      | 0.25  |     |      |      |       |     |       |       |     |       |       |       |      |     |       | 100          | 116 |     |
| S9     | 27   | 3        | Chr          |        | 0.34  | 12.13 | 31.93 |      | 7.47  |       |       |      |       |       |       |    |      | 48.13 |     |      |      |       |     |       |       |     |       |       |       |      |     |       | 100          | 104 |     |
| S9     | 27   | 4        | Zrn          | 31.24  |       |       |       |      |       |       |       |      |       |       |       |    |      |       |     |      |      |       |     | 68.76 |       |     |       |       |       |      |     |       | 100          | 123 |     |
| S9     | 27   | 5        | Grt          | 39.69  |       | 20.91 | 28.46 | 4.27 | 4.58  | 2.09  |       |      |       |       |       |    |      |       |     |      |      |       |     |       |       |     |       |       |       |      |     |       | 100          | 116 |     |
| S9     | 27   | 6        | Cpx          | 53.97  | 0.29  | 3.41  | 1.85  |      | 16.66 | 22.72 |       |      |       |       |       |    |      | 1.11  |     |      |      |       |     |       |       |     |       |       |       |      |     |       |              | 100 | 119 |
| S9     | 27   | 7        | Mnz          | 0.97   |       |       |       |      |       | 1.04  |       |      | 36.32 |       | 0.08  |    |      |       |     |      |      |       |     |       | 4.21  |     | 16.13 | 29.92 | 11.34 |      |     |       |              | 100 | 104 |
| S9     | 27   | 8        | Grt          | 40.35  |       | 21.01 | 26.74 | 0.35 | 2.19  | 9.36  |       |      |       |       |       |    |      |       |     |      |      |       |     |       |       |     |       |       |       |      |     |       |              | 100 | 114 |
| S9     | 27   | 9        | OI           | 41.85  |       |       | 8.49  |      | 49.27 |       |       |      |       |       |       |    |      |       |     | 0.39 |      |       |     |       |       |     |       |       |       |      |     |       |              | 100 | 119 |
| S9     | 27   | 10       | Chl          | 28.27  |       | 18.26 | 1.28  |      | 1.60  | 33.39 |       |      |       |       | 2.21  |    |      |       |     |      |      |       |     |       |       |     |       |       |       |      |     |       |              | 85  | 88  |
| S9     | 27   | 11       | Cpx          | 55.21  | 0.31  | 3.47  | 7.50  |      | 17.92 | 13.86 | 1.72  |      |       |       |       |    |      |       |     |      |      |       |     |       |       |     |       |       |       |      |     |       |              | 100 | 113 |
| S9     | 27   | 12       | "Mag" +      | 5.04   |       | 1.46  | 92.24 |      |       | 0.47  |       |      | 0.79  |       |       |    |      |       |     |      |      |       |     |       |       |     |       |       |       |      |     |       |              | 100 | 87  |
| S9     | 27   | 13       | OI           | 41.59  |       |       | 8.11  |      | 49.94 |       |       |      |       |       |       |    |      |       |     | 0.36 |      |       |     |       |       |     |       |       |       |      |     |       |              | 100 | 117 |
| S9     | 27   | 14       | Chl          | 33.86  |       | 17.76 | 28.63 |      | 3.91  | 0.84  |       |      |       |       |       |    |      |       |     |      |      |       |     |       |       |     |       |       |       |      |     |       |              | 85  | 113 |
| S9     | 27   | 15       | Chr          |        |       | 13.45 | 24.97 |      | 9.77  |       |       |      |       |       |       |    |      | 51.81 |     |      |      |       |     |       |       |     |       |       |       |      |     |       |              | 100 | 106 |
| S9     | 27   | 16       | Chl          | 29.04  |       | 14.82 | 31.99 | 0.31 | 8.55  | 0.31  |       |      |       |       |       |    |      |       |     |      |      |       |     |       |       |     |       |       |       |      |     |       |              | 85  | 95  |
| S9     | 27   | 17       | Py           | 0.52   |       |       | 28.85 |      | 0.27  |       |       |      |       | 70.36 |       |    |      |       |     |      |      |       |     |       |       |     |       |       |       |      |     |       |              | 100 | 215 |
| S9     | 27   | 18       | Fl +         | 21.33  |       | 6.30  | 2.94  |      | 5.59  | 26.03 | 2.12  | 0.44 |       |       | 35.25 |    |      |       |     |      |      |       |     |       |       |     |       |       |       |      |     |       |              | 100 | 131 |
| S9     | 27   | 19       | Chl + Plag   | 40.30  | 0.87  | 14.12 | 23.75 | 0.49 | 13.90 | 5.97  | 0.60  |      |       |       |       |    |      |       |     |      |      |       |     |       |       |     |       |       |       |      |     |       |              | 100 | 102 |
| S9     | 27   | 20       | Ab           | 66.64  |       | 20.34 | 0.46  |      |       | 1.71  | 10.63 | 0.22 |       |       |       |    |      |       |     |      |      |       |     |       |       |     |       |       |       |      |     |       |              | 100 | 117 |
| S9     | 27   | 21       | Chr          | 3.51   |       | 15.29 | 29.64 | 0.81 | 5.52  |       |       |      |       |       |       |    |      | 45.23 |     |      |      |       |     |       |       |     |       |       |       |      |     |       |              | 100 | 91  |
| S9     | 27   | 22       | Spl          |        | 0.92  | 26.30 | 27.19 |      | 11.00 |       |       |      |       |       |       |    | 0.44 | 34.15 |     |      |      |       |     |       |       |     |       |       |       |      |     |       |              | 100 | 103 |
| S9     | 27   | 23       | OI           | 41.94  |       |       | 6.49  |      | 51.19 |       |       |      |       |       |       |    |      |       |     | 0.37 |      |       |     |       |       |     |       |       |       |      |     |       |              | 100 | 111 |
| S9     | 27   | 24       | Cpx          | 53.28  | 0.75  | 3.93  | 6.49  |      | 16.89 | 18.09 | 0.29  |      |       |       |       |    |      | 0.28  |     |      |      |       |     |       |       |     |       |       |       |      |     |       |              | 100 | 111 |
| S9     | 27   | 25       | OI           | 41.49  |       |       | 8.82  |      | 49.36 |       |       |      |       |       |       |    |      |       |     | 0.34 |      |       |     |       |       |     |       |       |       |      |     |       |              | 100 | 122 |
| S9     | 27   | 26       | Chr          |        | 0.41  | 24.28 | 21.58 |      | 12.58 |       |       |      |       |       |       |    |      | 41.15 |     |      |      |       |     |       |       |     |       |       |       |      |     |       |              | 100 | 115 |
| S9     | 27   | 27       | Ti-Mag +     | 1.89   | 16.19 | 3.64  | 73.99 | 0.89 | 2.25  |       |       |      |       |       |       |    | 1.14 |       |     |      |      |       |     |       |       |     |       |       |       |      |     |       |              | 100 | 103 |
| S9     | 28   | 1        | Spl          |        |       | 32.09 | 14.88 |      | 15.64 |       |       |      |       |       |       |    | 0.37 | 37.02 |     |      |      |       |     |       |       |     |       |       |       |      |     |       |              | 100 | 107 |
| S9     | 28   | 2        | Chr          |        |       | 28.52 | 20.38 |      | 13.05 |       |       |      |       |       |       |    |      | 38.05 |     |      |      |       |     |       |       |     |       |       |       |      |     |       |              | 100 | 103 |
| S9     | 28   | 3        | Cpx          | 51.01  | 2.17  | 3.83  | 8.10  |      | 13.96 | 20.45 | 0.48  |      |       |       |       |    |      |       |     |      |      |       |     |       |       |     |       |       |       |      |     |       |              | 100 | 110 |
| S9     | 28   | 4        | OI           | 41.91  |       |       | 8.78  |      | 48.96 |       |       |      |       |       |       |    |      |       |     | 0.35 |      |       |     |       |       |     |       |       |       |      |     |       |              | 100 | 109 |
| S9     | 28   | 5        | Ti-Mag       | 0.99   | 17.57 | 3.76  | 72.79 | 1.63 | 1.75  |       |       |      |       |       |       |    | 1.15 | 0.37  |     |      |      |       |     |       |       |     |       |       |       |      |     |       |              | 100 | 95  |
| S9     | 28   | 6        | Spl          |        | 0.35  | 21.37 | 33.49 |      | 7.39  |       |       |      |       |       |       |    | 0.46 | 36.95 |     |      |      |       |     |       |       |     |       |       |       |      |     |       |              | 100 | 105 |
| S9     | 28   | 7        | Chr          |        |       | 8.62  | 22.38 |      | 9.39  |       |       |      |       |       |       |    |      | 59.61 |     |      |      |       |     |       |       |     |       |       |       |      |     |       |              | 100 | 104 |
| S9     | 28   | 8        | Cpx          | 51.11  | 0.92  | 3.77  | 14.80 | 0.37 | 13.13 | 14.49 | 1.42  |      |       |       |       |    |      |       |     |      |      |       |     |       |       |     |       |       |       |      |     |       |              | 100 | 109 |
| S9     | 28   | 9        | OI           | 42.11  |       |       | 7.62  |      | 49.92 |       |       |      |       |       |       |    |      |       |     | 0.36 |      |       |     |       |       |     |       |       |       |      |     |       |              | 100 | 114 |
| S9     | 28   | 10       | Opx          | 59.00  |       | 0.36  | 5.36  | 0.23 | 35.04 |       |       |      |       |       |       |    |      |       |     |      |      |       |     |       |       |     |       |       |       |      |     |       |              | 100 | 124 |
| S9     | 28   | 11       | Zrn          | 31.25  |       |       |       |      |       |       |       |      |       |       |       |    |      |       |     |      |      |       |     |       | 68.75 |     |       |       |       |      |     |       |              | 100 | 124 |
| S9     | 28   | 12       | OI           | 42.40  |       |       | 9.35  |      | 47.87 |       |       |      |       |       |       |    |      |       |     | 0.38 |      |       |     |       |       |     |       |       |       |      |     |       |              | 100 | 120 |
| S9     | 28   | 13       | Spl          |        |       | 54.69 | 11.49 |      | 20.06 |       |       |      |       |       |       |    |      | 13.75 |     |      |      |       |     |       |       |     |       |       |       |      |     |       |              | 100 | 114 |
| S9     | 28   | 14       | Bad Analysis | 31.44  |       |       |       |      |       | 25.64 |       |      |       |       | 0.89  |    |      |       |     |      |      |       |     |       |       |     |       |       |       |      |     |       |              | 100 | 148 |
| S9     | 28   | 15       | Grt          | 37.29  |       | 0.59  | 27.21 |      | 0.34  | 34.56 |       |      |       |       |       |    |      |       |     |      |      |       |     |       |       |     |       |       |       |      |     |       |              | 100 | 102 |
| S9     | 28   | 16       | "OI"         | 49.73  |       | 0.88  | 4.74  |      | 42.16 |       |       |      |       |       |       |    |      |       |     |      |      |       |     |       |       |     |       |       |       |      |     | 2.49  |              | 100 | 77  |
| S9     | 28   | 17       | Chr          |        | 0.49  | 23.56 | 24.66 |      | 11.45 |       |       |      |       |       |       |    |      | 39.83 |     |      |      |       |     |       |       |     |       |       |       |      |     |       |              | 100 | 108 |
| S9     | 28   | 18       | OI           | 41.70  |       |       | 8.56  |      | 49.34 |       |       |      |       |       |       |    |      |       |     | 0.40 |      |       |     |       |       |     |       |       |       |      |     |       |              | 100 | 120 |
| S9     | 28   | 19       | Dol          |        |       |       |       |      | 22.78 | 31.22 |       |      |       |       |       |    |      |       |     |      |      |       |     |       |       |     |       |       |       |      |     |       |              | 54  | 57  |
| S9     | 28   | 20       | Chr          |        |       | 9.03  | 27.67 |      | 6.66  |       |       |      |       |       |       |    | 0.51 | 55.61 |     |      | 0.52 |       |     |       |       |     |       |       |       |      |     |       |              | 100 | 106 |

Table B4.2: EDS analyses of sample S9.

| Sample | Site | Position | Mineral      | SiO2   | TiO2  | Al2O3 | FeO   | MnO  | MgO   | CaO   | Na2O  | K2O  | P2O5 | SO3   | F     | Cl | V2O5 | Cr2O3 | CoO   | NiO  | ZnO | As2O3 | SrO | ZrO2 | Ag2O | BaO   | La2O3 | Ce2O3 | Nd2O3 | HfO2 | WO3 | Total | Actual Total |
|--------|------|----------|--------------|--------|-------|-------|-------|------|-------|-------|-------|------|------|-------|-------|----|------|-------|-------|------|-----|-------|-----|------|------|-------|-------|-------|-------|------|-----|-------|--------------|
| S9     | 28   | 21       | Grt          | 41.13  | 1.33  | 15.40 | 7.40  | 0.63 | 0.52  | 33.59 |       |      |      |       |       |    |      |       |       |      |     |       |     |      |      |       |       |       |       |      |     | 100   | 108          |
| S9     | 28   | 22       | Ol           | 41.81  |       |       | 8.69  |      | 49.17 |       |       |      |      |       |       |    |      |       |       | 0.33 |     |       |     |      |      |       |       |       |       |      |     | 100   | 113          |
| S9     | 28   | 23       | Qz           | 100.00 |       |       |       |      |       |       |       |      |      |       |       |    |      |       |       |      |     |       |     |      |      |       |       |       |       |      |     | 100   | 116          |
| S9     | 28   | 24       | Amph         | 50.79  | 0.54  | 1.24  | 19.92 | 0.66 | 13.03 | 10.82 |       |      |      |       |       |    |      |       |       |      |     |       |     |      |      |       |       |       |       |      |     | 97    | 116          |
| S9     | 28   | 25       | Qz +         | 92.91  |       | 3.90  | 0.76  |      |       |       | 2.43  |      |      |       |       |    |      |       |       |      |     |       |     |      |      |       |       |       |       |      |     | 100   | 118          |
| S9     | 29   | 1        | Chr          |        |       | 25.26 | 15.07 |      | 14.89 |       |       |      |      |       |       |    |      | 44.79 |       |      |     |       |     |      |      |       |       |       |       |      |     | 100   | 106          |
| S9     | 29   | 2        | Chl + Qz     | 58.71  |       | 12.28 | 23.78 | 0.68 | 4.56  |       |       |      |      |       |       |    |      |       |       |      |     |       |     |      |      |       |       |       |       |      |     | 100   | 96           |
| S9     | 29   | 3        | Cpx          | 51.59  | 2.21  | 4.16  | 6.67  |      | 14.40 | 20.42 | 0.56  |      |      |       |       |    |      |       |       |      |     |       |     |      |      |       |       |       |       |      |     | 100   | 113          |
| S9     | 29   | 4        | Fl           |        |       |       |       |      | 0.77  | 53.89 |       |      |      |       | 45.34 |    |      |       |       |      |     |       |     |      |      |       |       |       |       |      |     | 100   | 102          |
| S9     | 29   | 5        | Ol           | 43.25  |       |       | 8.63  |      | 47.78 |       |       |      |      |       |       |    |      |       |       | 0.34 |     |       |     |      |      |       |       |       |       |      |     | 100   | 115          |
| S9     | 29   | 6        | "Ilm" +      | 24.70  | 44.85 | 0.97  | 7.89  | 1.42 | 0.37  | 18.88 |       |      |      |       |       |    | 0.91 |       |       |      |     |       |     |      |      |       |       |       |       |      |     | 100   | 110          |
| S9     | 29   | 7        | Grt          | 39.80  |       | 20.75 | 29.92 | 1.24 | 2.92  | 5.37  |       |      |      |       |       |    |      |       |       |      |     |       |     |      |      |       |       |       |       |      |     | 100   | 116          |
| S9     | 29   | 8        | Chr          |        |       | 12.15 | 18.53 |      | 11.14 |       |       |      |      |       |       |    |      | 58.18 |       |      |     |       |     |      |      |       |       |       |       |      |     | 100   | 107          |
| S9     | 29   | 9        | Brt          |        |       |       |       |      |       |       |       |      |      | 25.71 |       |    |      |       | -0.02 |      |     |       |     |      |      | 46.49 |       |       |       |      |     | 100   | 160          |
| S9     | 29   | 10       | Brt          |        |       |       |       |      |       |       |       |      |      | 25.69 |       |    |      |       | -0.14 |      |     |       |     |      |      | 46.73 |       |       |       |      |     | 100   | 160          |
| S9     | 29   | 11       | Ti-Mag       |        | 14.84 | 2.74  | 77.87 | 0.44 | 2.97  | 0.27  |       |      |      |       |       |    | 0.87 |       |       |      |     |       |     |      |      |       |       |       |       |      |     | 100   | 99           |
| S9     | 29   | 12       | Cpx          | 54.49  | 0.40  | 1.33  | 9.25  | 0.36 | 14.86 | 19.32 |       |      |      |       |       |    |      |       |       |      |     |       |     |      |      |       |       |       |       |      |     | 100   | 114          |
| S9     | 29   | 13       | Chr          |        |       | 16.20 | 18.46 |      | 11.93 |       |       |      |      |       |       |    | 0.46 | 52.95 |       |      |     |       |     |      |      |       |       |       |       |      |     | 100   | 108          |
| S9     | 29   | 14       | Dol          |        |       |       |       |      | 22.97 | 31.03 |       |      |      |       |       |    |      |       |       |      |     |       |     |      |      |       |       |       |       |      |     | 54    | 56           |
| S9     | 29   | 15       | Chr          |        |       | 22.01 | 21.79 |      | 13.57 |       |       |      |      |       |       |    | 0.35 | 42.28 |       |      |     |       |     |      |      |       |       |       |       |      |     | 100   | 106          |
| S9     | 29   | 16       | Spl          |        |       | 44.37 | 15.41 |      | 17.14 |       |       |      |      |       |       |    |      | 23.08 |       |      |     |       |     |      |      |       |       |       |       |      |     | 100   | 109          |
| S9     | 29   | 17       | Ab           | 66.68  |       | 20.15 | 0.82  |      |       | 0.91  | 10.65 | 0.79 |      |       |       |    |      |       |       |      |     |       |     |      |      |       |       |       |       |      |     | 100   | 116          |
| S9     | 29   | 18       | Cpx          | 49.65  | 1.09  | 5.58  | 13.09 | 0.30 | 14.86 | 14.38 | 0.69  |      |      |       |       |    |      | 0.36  |       |      |     |       |     |      |      |       |       |       |       |      |     | 100   | 106          |
| S9     | 29   | 19       | Po +         | 2.20   |       |       | 54.09 |      | 0.44  | 0.36  |       |      |      | 42.91 |       |    |      |       |       |      |     |       |     |      |      |       |       |       |       |      |     | 100   | 127          |
| S9     | 29   | 20       | Opx          | 58.79  |       |       | 4.85  | 0.22 | 35.45 | 0.44  |       |      |      |       |       |    |      | 0.25  |       |      |     |       |     |      |      |       |       |       |       |      |     | 100   | 118          |
| S9     | 29   | 21       | Ol           | 41.73  |       |       | 8.56  |      | 49.37 |       |       |      |      |       |       |    |      |       |       | 0.33 |     |       |     |      |      |       |       |       |       |      |     | 100   | 110          |
| S9     | 29   | 22       | Ol           | 42.31  |       |       | 5.98  |      | 51.30 |       |       |      |      |       |       |    |      |       |       | 0.42 |     |       |     |      |      |       |       |       |       |      |     | 100   | 121          |
| S9     | 29   | 23       | Cpx          | 52.52  | 1.32  | 3.98  | 4.89  |      | 16.35 | 19.63 | 0.52  |      |      |       |       |    |      | 0.79  |       |      |     |       |     |      |      |       |       |       |       |      |     | 100   | 128          |
| S9     | 29   | 24       | Mag          |        |       |       | 97.22 |      | 1.53  |       |       |      |      |       |       |    |      | 0.42  |       | 0.83 |     |       |     |      |      |       |       |       |       |      |     | 100   | 100          |
| S9     | 29   | 25       | Chr          |        |       | 15.25 | 17.30 | 1.25 | 11.99 |       |       |      |      |       |       |    | 0.38 | 53.84 |       |      |     |       |     |      |      |       |       |       |       |      |     | 100   | 113          |
| S9     | 29   | 26       | "Cpx" or Mix | 58.55  |       | 3.84  | 1.99  |      | 22.93 | 12.23 |       |      |      |       |       |    |      | 0.46  |       |      |     |       |     |      |      |       |       |       |       |      |     | 100   | 115          |



Table B4.2: EDS analyses of sample S9.

| Sample | Site | Position | Mineral                                 | SiO2  | TiO2  | Al2O3 | FeO   | MnO  | MgO   | CaO   | Na2O | K2O | P2O5 | SO3 | F    | Cl | V2O5 | Cr2O3 | CoO | NiO | ZnO | As2O3 | SrO | ZrO2 | Ag2O | BaO | La2O3 | Ce2O3 | Nd2O3 | HfO2 | WO3 | Total | Actual Total |
|--------|------|----------|-----------------------------------------|-------|-------|-------|-------|------|-------|-------|------|-----|------|-----|------|----|------|-------|-----|-----|-----|-------|-----|------|------|-----|-------|-------|-------|------|-----|-------|--------------|
| S9     | 29   | 27       | Spl                                     |       |       | 43.76 | 14.58 |      | 17.43 |       |      |     |      |     |      |    |      | 24.23 |     |     |     |       |     |      |      |     |       |       |       |      |     | 100   | 109          |
| S9     | 29   | 28       | Srp                                     | 43.31 |       | 0.70  | 3.94  |      | 37.85 | 0.26  |      |     |      |     |      |    |      | 0.94  |     |     |     |       |     |      |      |     |       |       |       |      |     | 87    | 92           |
| S9     | 29   | 29       | Ep                                      | 39.72 |       | 0.93  | 18.26 |      | 12.02 | 24.23 |      |     |      |     |      |    |      | 1.84  |     |     |     |       |     |      |      |     |       |       |       |      |     | 97    | 98           |
| S9     | 29   | 30       | Chr                                     |       |       | 12.51 | 25.06 |      | 8.16  |       |      |     |      |     |      |    |      | 54.27 |     |     |     |       |     |      |      |     |       |       |       |      |     | 100   | 103          |
| S9     | 29   | 31       | Grt                                     | 40.20 |       | 20.96 | 24.75 | 4.81 | 1.54  | 7.74  |      |     |      |     |      |    |      |       |     |     |     |       |     |      |      |     |       |       |       |      |     | 100   | 106          |
| S9     | 29   | 32       | Opx                                     | 57.47 |       | 2.10  | 5.08  |      | 34.74 | 0.32  |      |     |      |     |      |    |      | 0.28  |     |     |     |       |     |      |      |     |       |       |       |      |     | 100   | 111          |
| S9     | 29   | 33       | Ttn                                     | 32.84 | 36.41 | 1.61  | 0.67  |      |       | 27.16 |      |     |      |     | 1.31 |    |      |       |     |     |     |       |     |      |      |     |       |       |       |      |     | 100   | 115          |
| S9     | 29   | 34       | Qz +                                    | 88.23 | 1.43  | 5.74  |       |      |       | 1.14  | 3.46 |     |      |     |      |    |      |       |     |     |     |       |     |      |      |     |       |       |       |      |     | 100   | 117          |
|        |      |          | Notes                                   |       |       |       |       |      |       |       |      |     |      |     |      |    |      |       |     |     |     |       |     |      |      |     |       |       |       |      |     |       |              |
|        |      |          | " " = indicates that mineral is altered |       |       |       |       |      |       |       |      |     |      |     |      |    |      |       |     |     |     |       |     |      |      |     |       |       |       |      |     |       |              |
|        |      |          | + = indicates other minerals present    |       |       |       |       |      |       |       |      |     |      |     |      |    |      |       |     |     |     |       |     |      |      |     |       |       |       |      |     |       |              |
|        |      |          |                                         |       |       |       |       |      |       |       |      |     |      |     |      |    |      |       |     |     |     |       |     |      |      |     |       |       |       |      |     |       |              |
|        |      |          |                                         |       |       |       |       |      |       |       |      |     |      |     |      |    |      |       |     |     |     |       |     |      |      |     |       |       |       |      |     |       |              |
|        |      |          |                                         |       |       |       |       |      |       |       |      |     |      |     |      |    |      |       |     |     |     |       |     |      |      |     |       |       |       |      |     |       |              |
|        |      |          |                                         |       |       |       |       |      |       |       |      |     |      |     |      |    |      |       |     |     |     |       |     |      |      |     |       |       |       |      |     |       |              |

**B5: SEM-BSE images and EDS  
mineral analyses for sample S10**

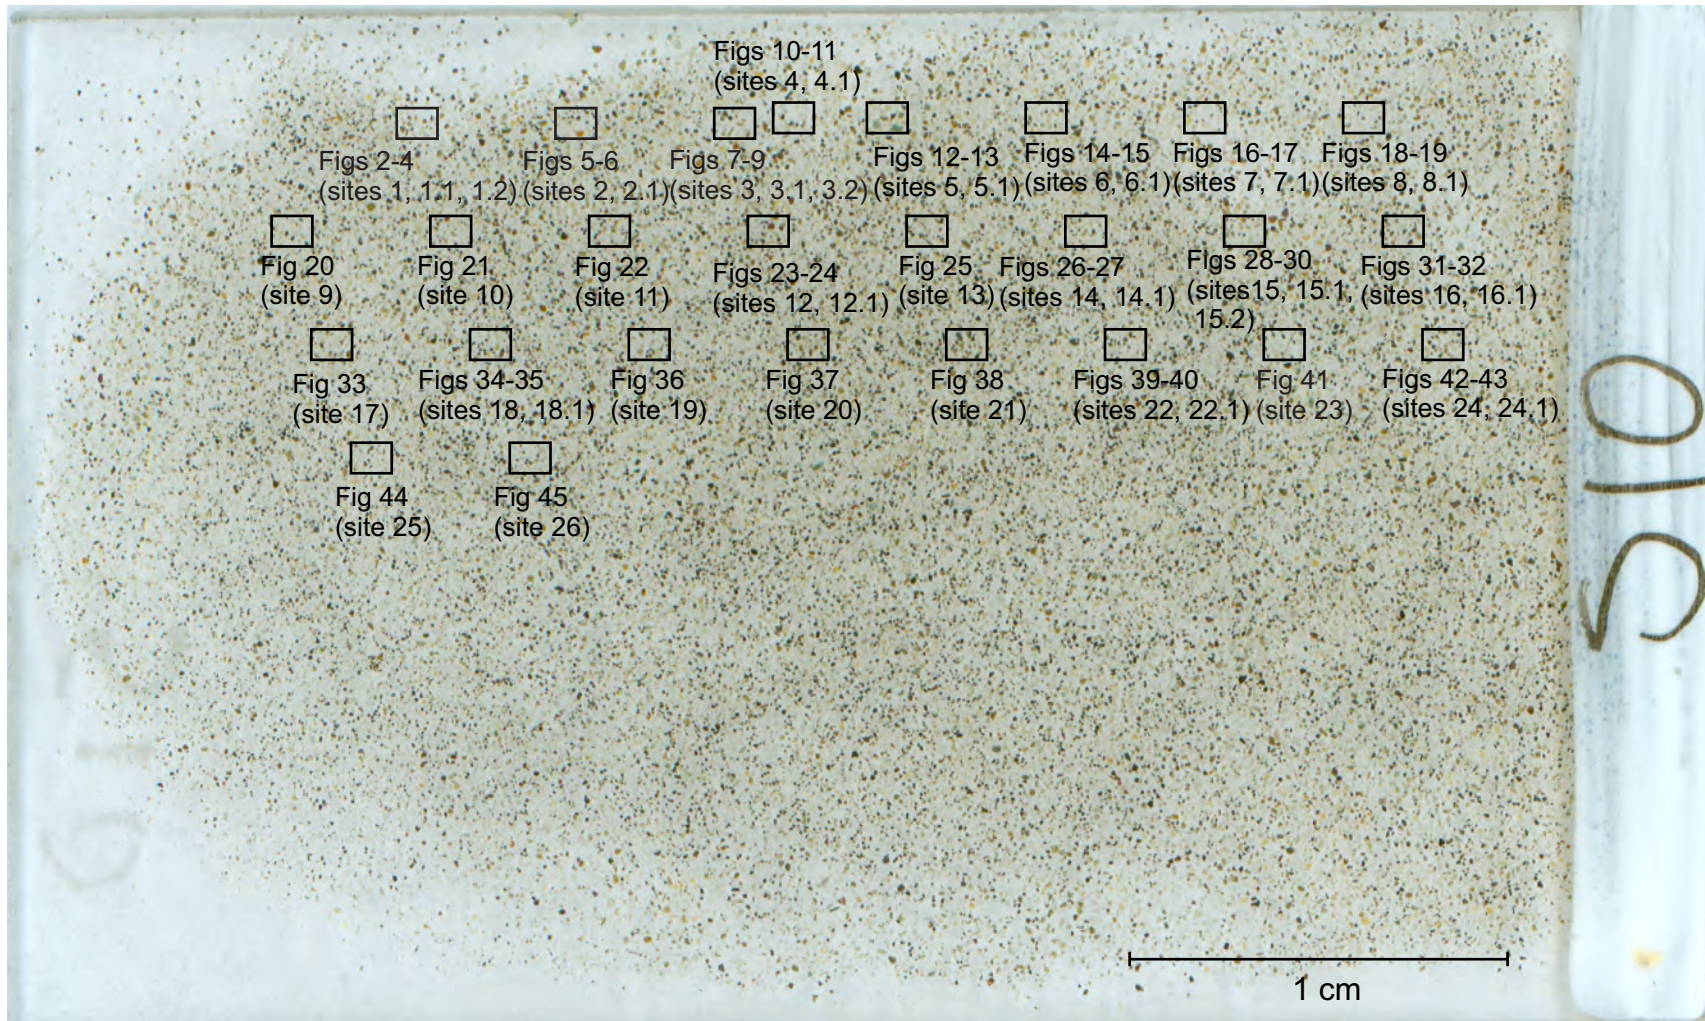

Figure B5.1: Scanned thin section of sample S10 showing the location of analysed sites. This sample comes from the Upper Arachthos River which is very bouldery and erosive. In lee of boulders there are some sand patches. It consists of muddy fine sand with some granules.

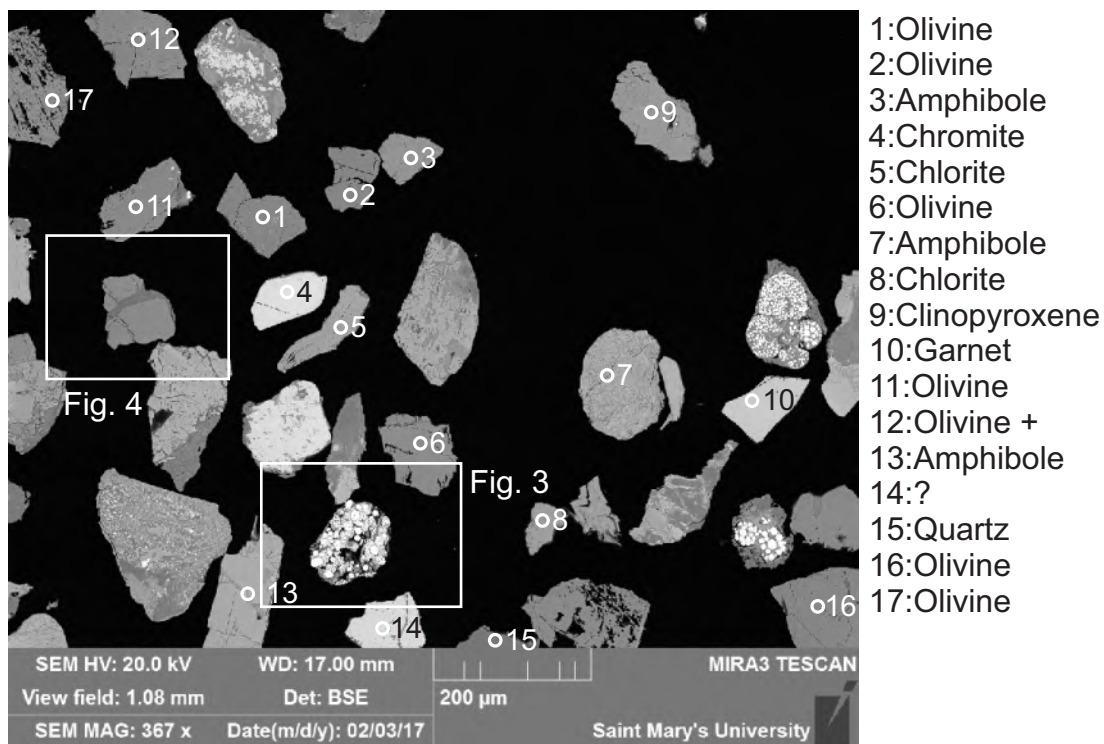

Figure B5.2: Sample 10 site 1 (SEM).

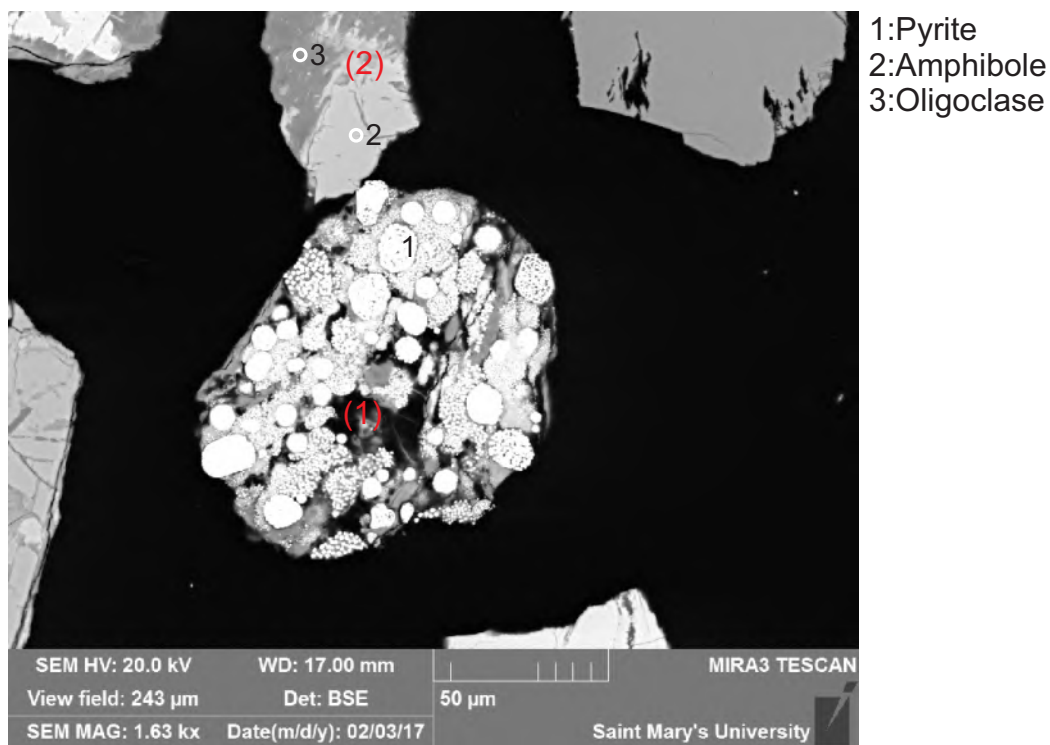

Figure B5.3: Sample 10 site 1.1 (SEM). 1: Lithic clast (pyrite cemented sandstone) 2: Lithic clast composed of amphibole + oligoclase, metamorphic.



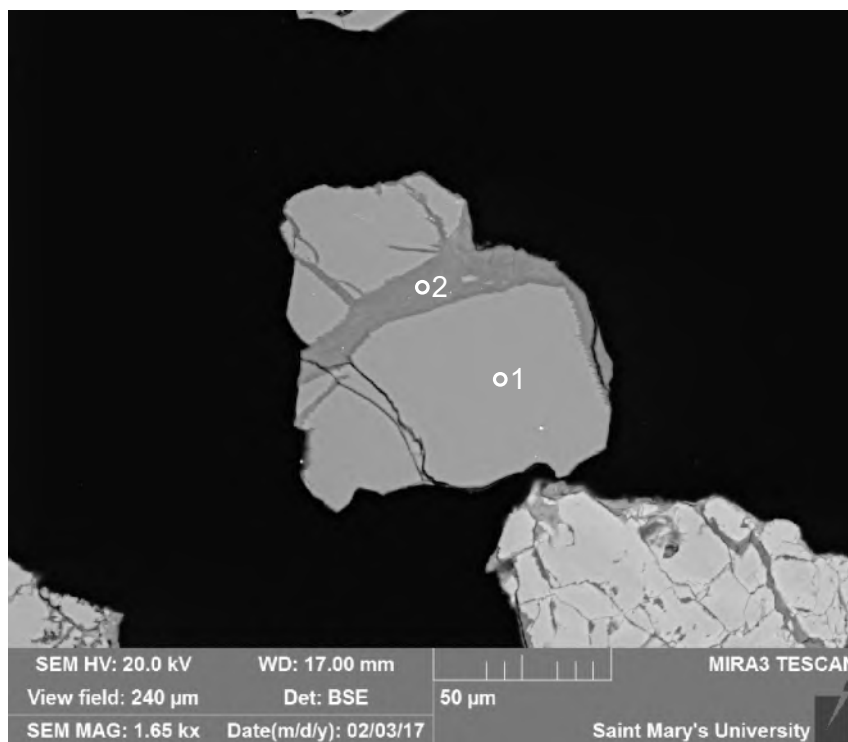

- 1:Olivine
- 2:Olivine

Figure B5.4: Sample 10 site 1.2 (SEM). Grain of altered olivine.

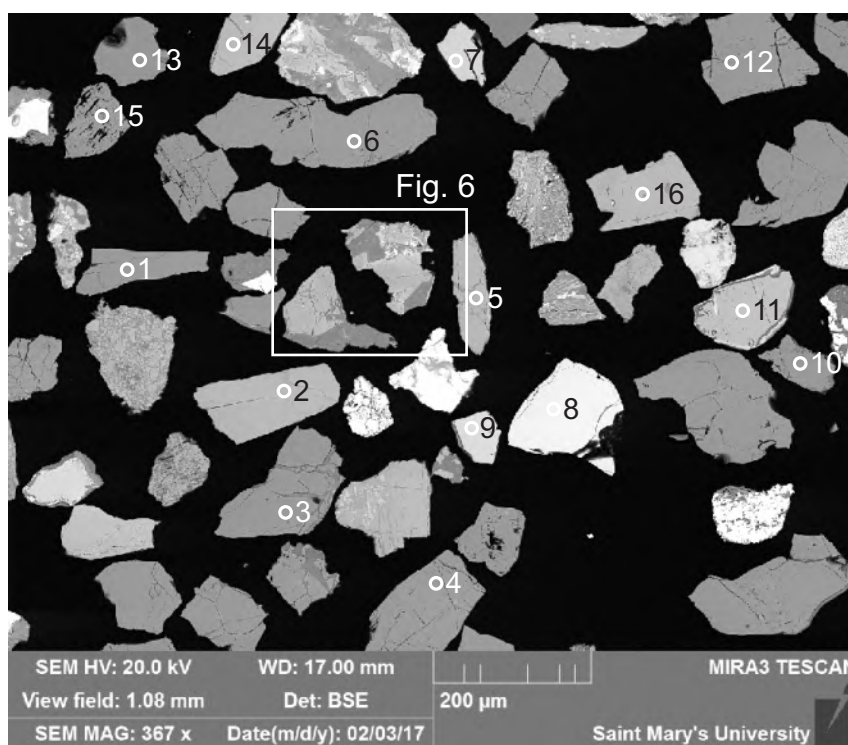

- 1:Actinolite
- 2:Amphibole
- 3:Olivine
- 4:Actinolite
- 5:Amphibole
- 6:Olivine
- 7:Garnet
- 8:Spinel
- 9:Garnet
- 10:Orthopyroxene
- 11:Spinel
- 12:Olivine
- 13:Olivine
- 14:Clinopyroxene
- 15:Olivine
- 16:Orthopyroxene

Figure B5.5: Sample 10 site 2 (SEM).



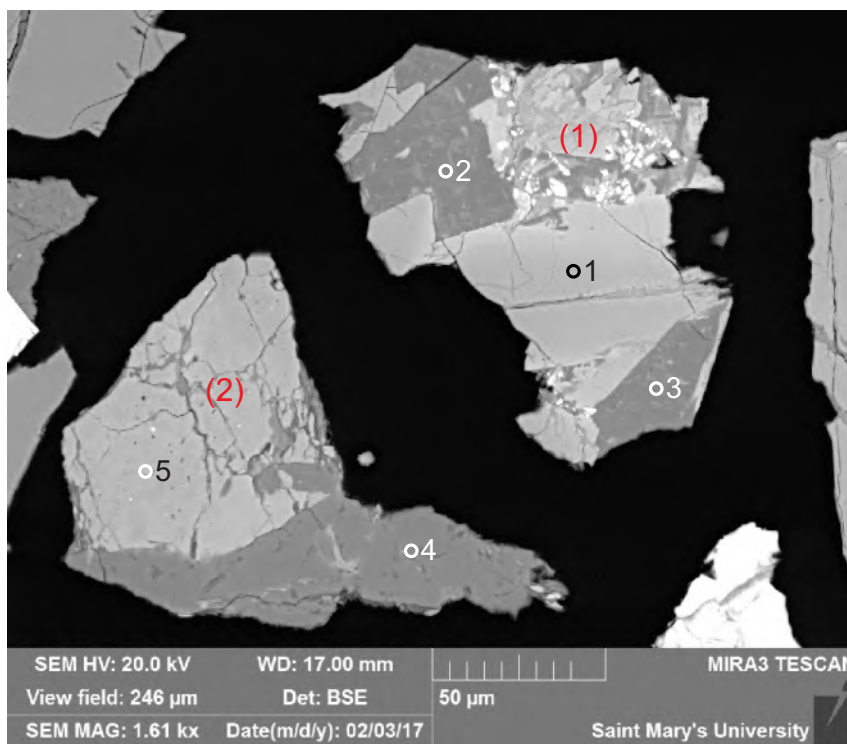

- 1: Clinopyroxene
- 2: Albite
- 3: Albite
- 4: Albite
- 5: Amphibole

Figure B5.6: Sample 10 site 2.1 (SEM). 1: Lithic clast (clinopyroxene + albite, ophiolite or metaophiolite). 2: Lithic clast (albite + amphibole, metaophiolite).

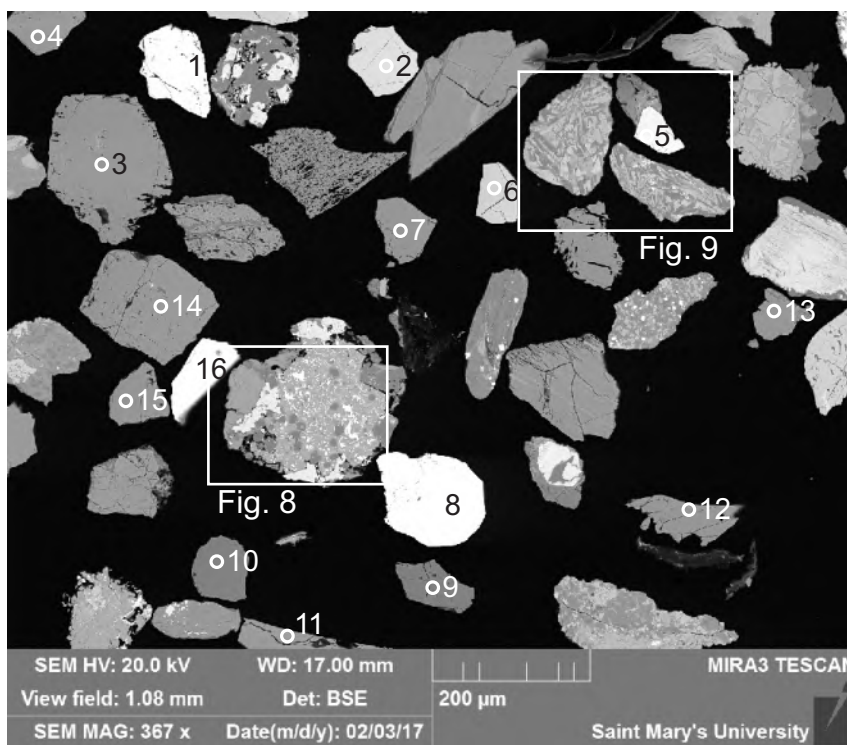

- 1: Chromite
- 2: Garnet
- 3: Olivine
- 4: Olivine
- 5: Chromite
- 6: Apatite
- 7: Olivine
- 8: Ti-Magnetite
- 9: Dolomite
- 10: Dolomite
- 11: Olivine
- 12: Orthopyroxene
- 13: Olivine
- 14: Olivine
- 15: Olivine
- 16: Chromite

Figure B5.7: Sample 10 site 3 (SEM).

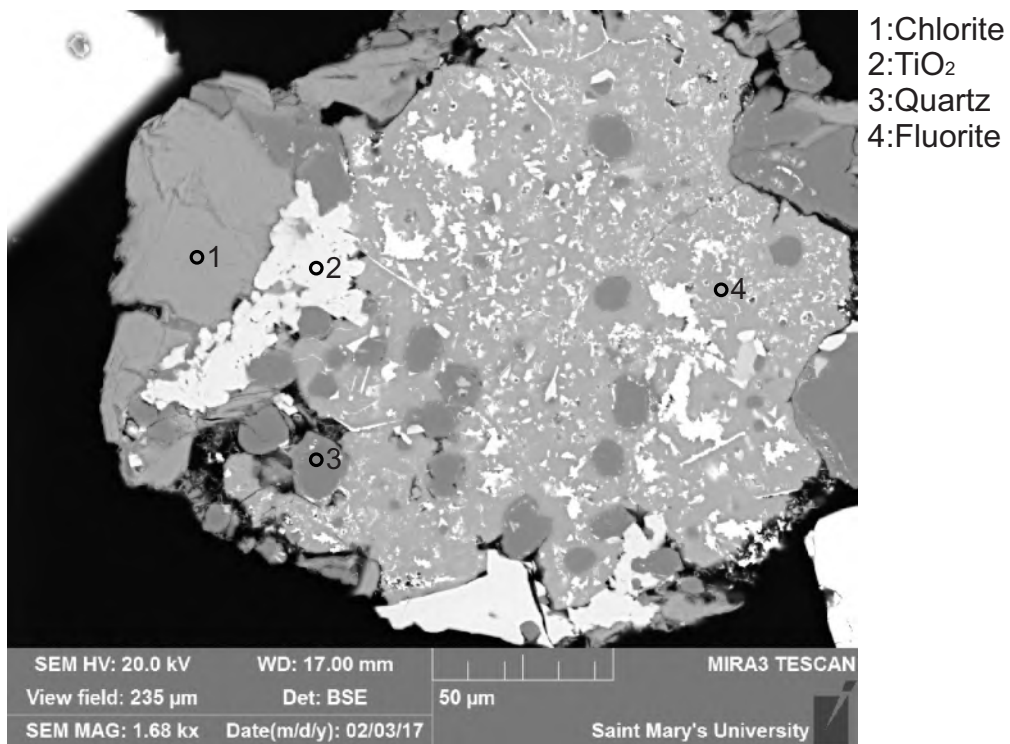

Figure B5.8: Sample 10 site 3.1 (SEM). Lithic clast composed of chlorite, fluorite, quartz, and titania, appears hydrothermal.

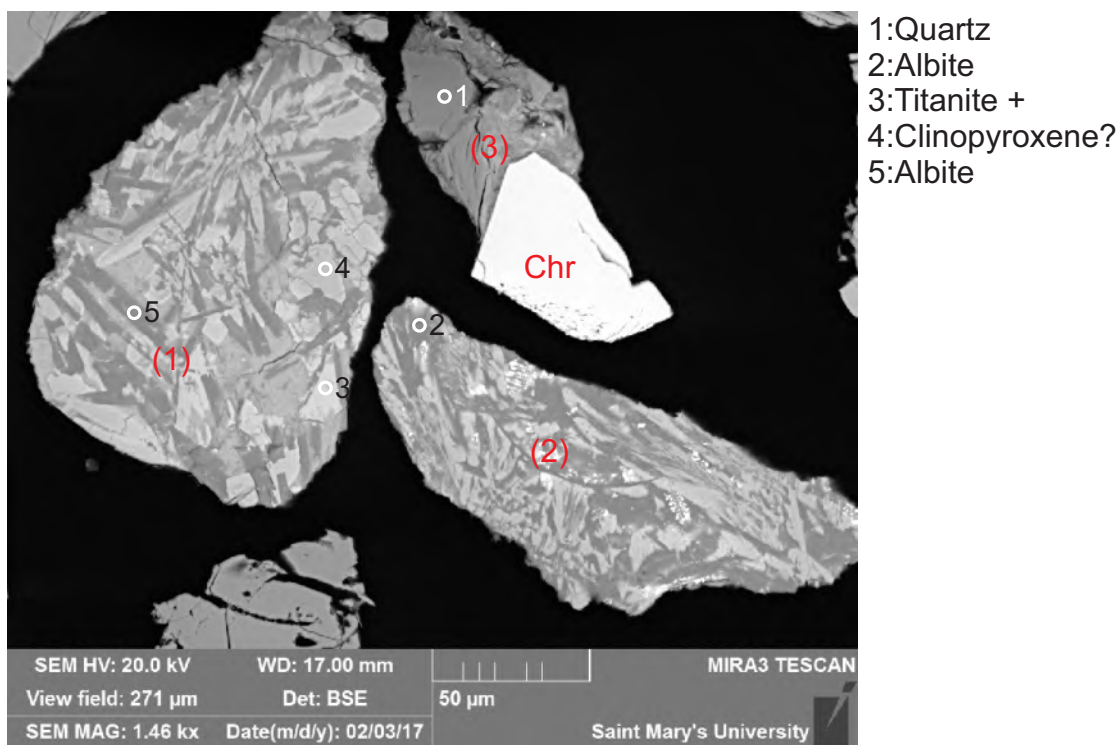

Figure B5.9: Sample 10 site 3.2 (SEM). 1,2: Lithic clast composed of titanite, clinopyroxene, and albite (metaophiolite). 3: Lithic clast (sandstone)

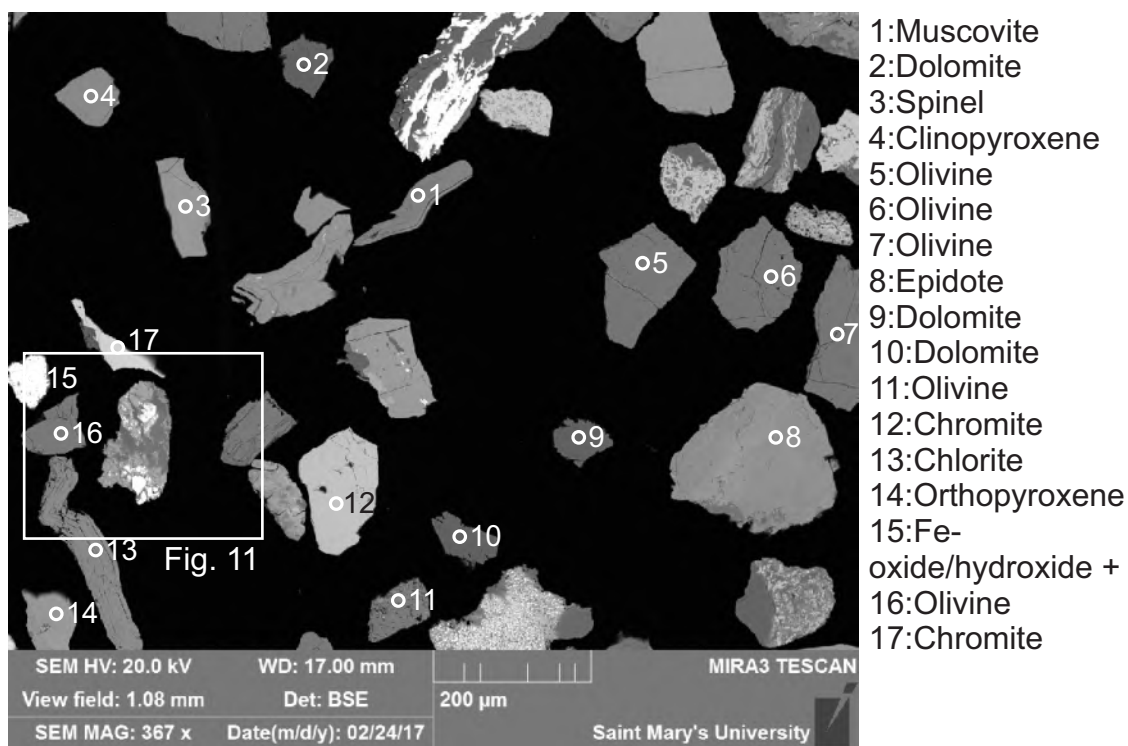

Figure B5.10: Sample 10 site 4 (SEM).

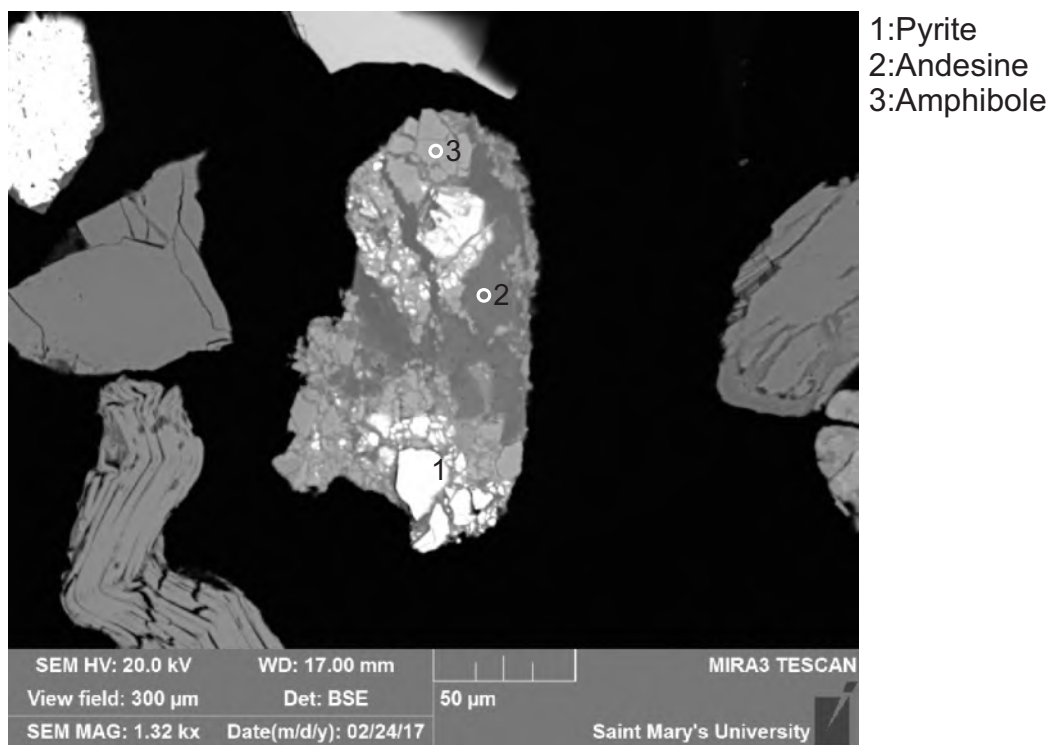

Figure B5.11: Sample 10 site 4.1 (SEM). Lithic clast composed of pyrite, andesine, and amphibole (andesine is primary igneous, but overall texture is hydrothermal).

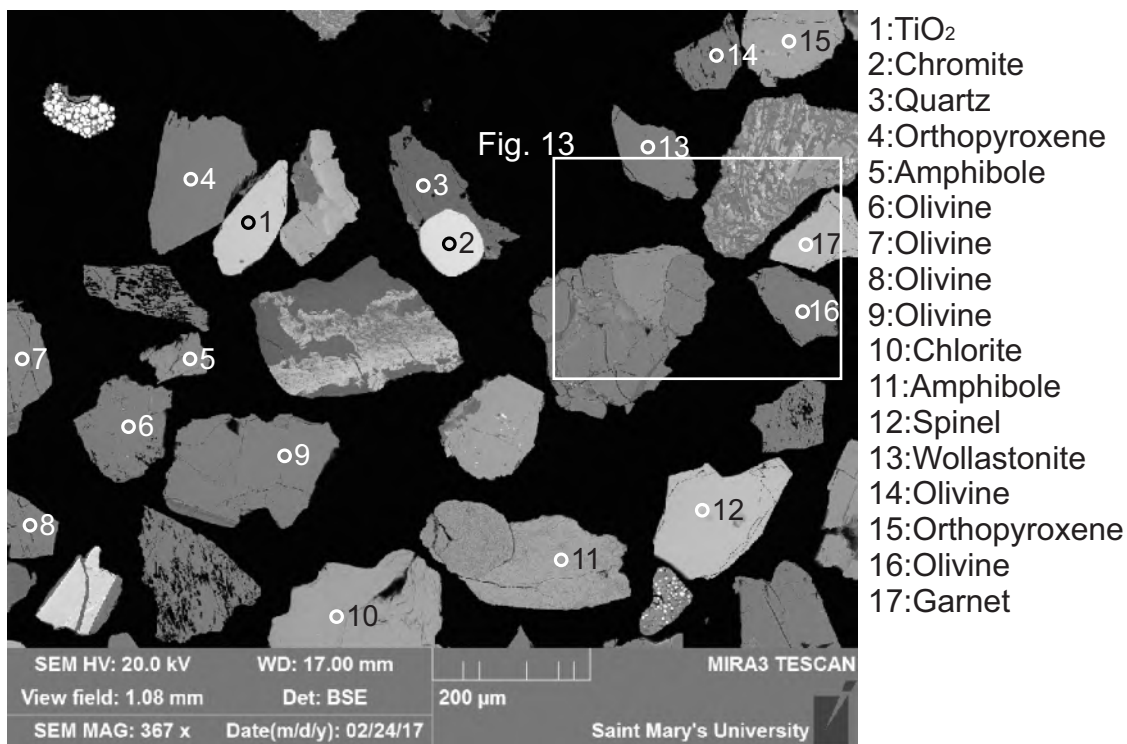

Figure B5.12: Sample 10 site 5 (SEM).

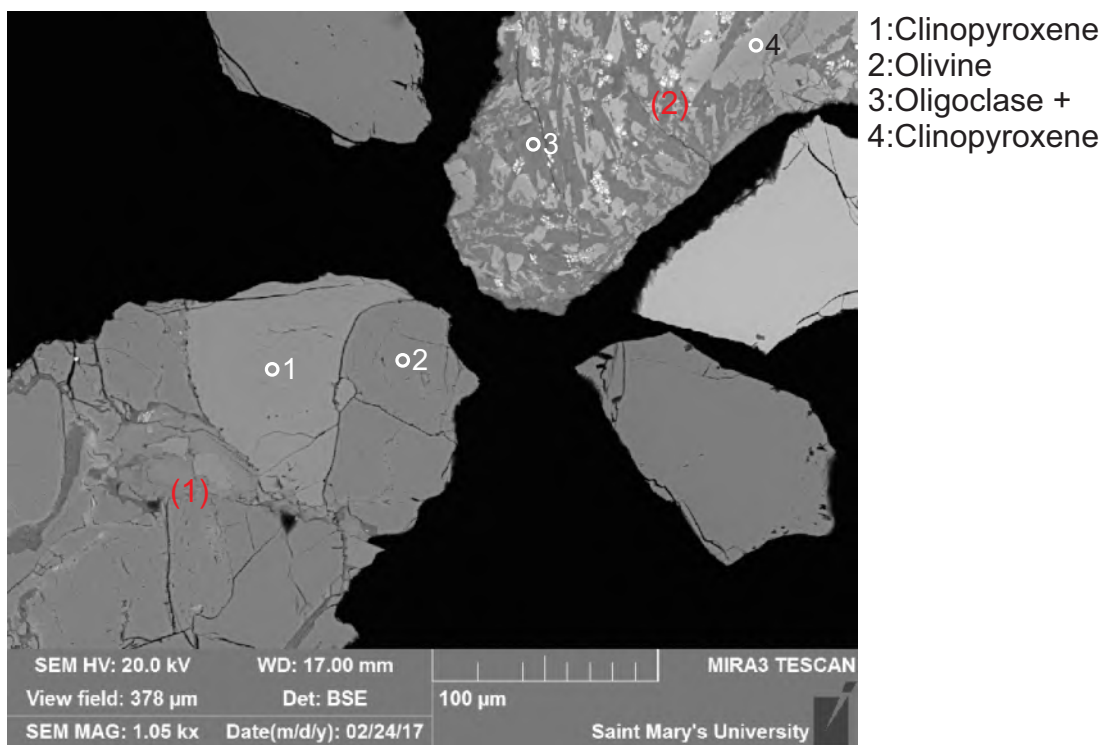

Figure B5.13: Sample 10 site 5.1 (SEM). 1: Lithic clast (clinopyroxene + olivine, ophiolite). 2: Lithic clast (albite + clinopyroxene, metaophiolite). See Fig. B5.9.



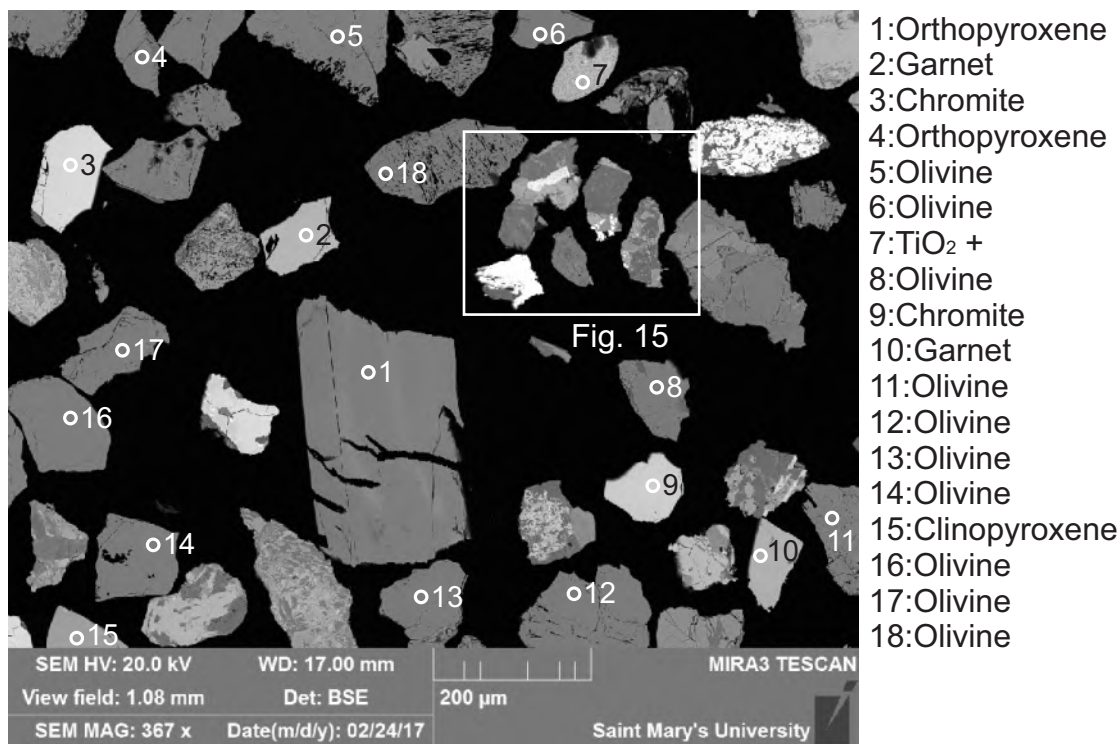

Figure B5.14: Sample 10 site 6 (SEM).

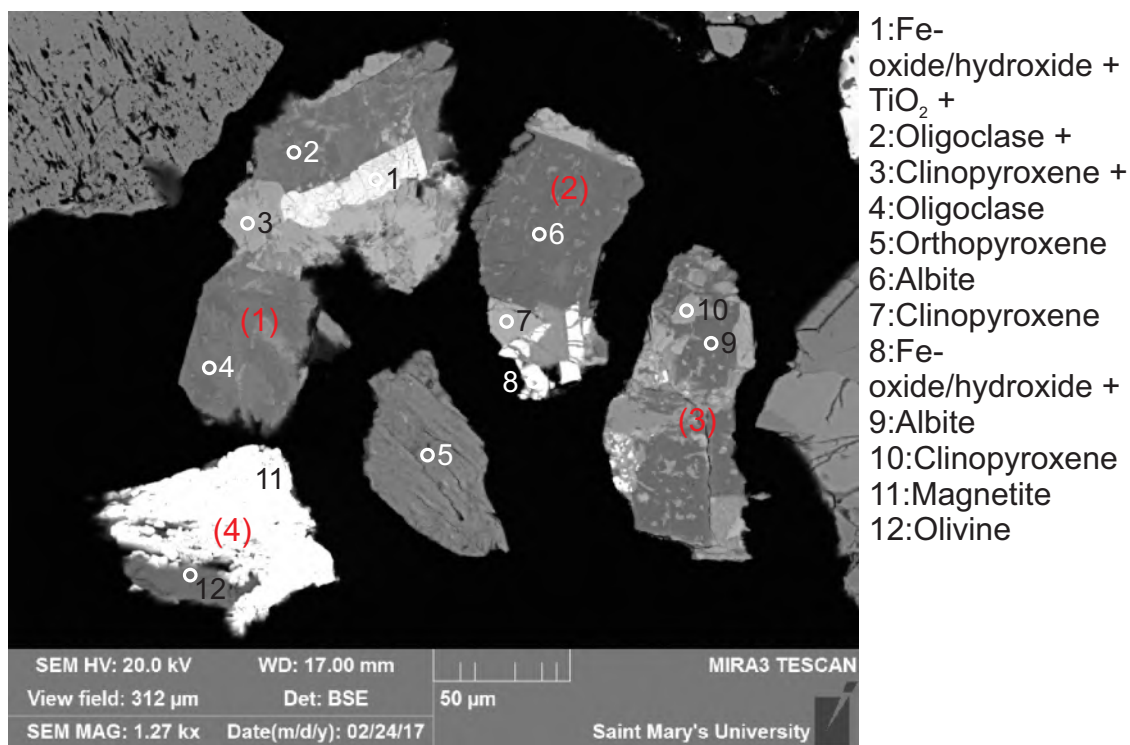

Figure B5.15: Sample 10 site 6.1 (SEM). Lithic clasts in this site consist of albite + clinopyroxene ± Fe-oxide/hydroxide ± oligoclase (metaophiolite). Other lithic clast (4) consists of olivine + magnetite (ophiolite).

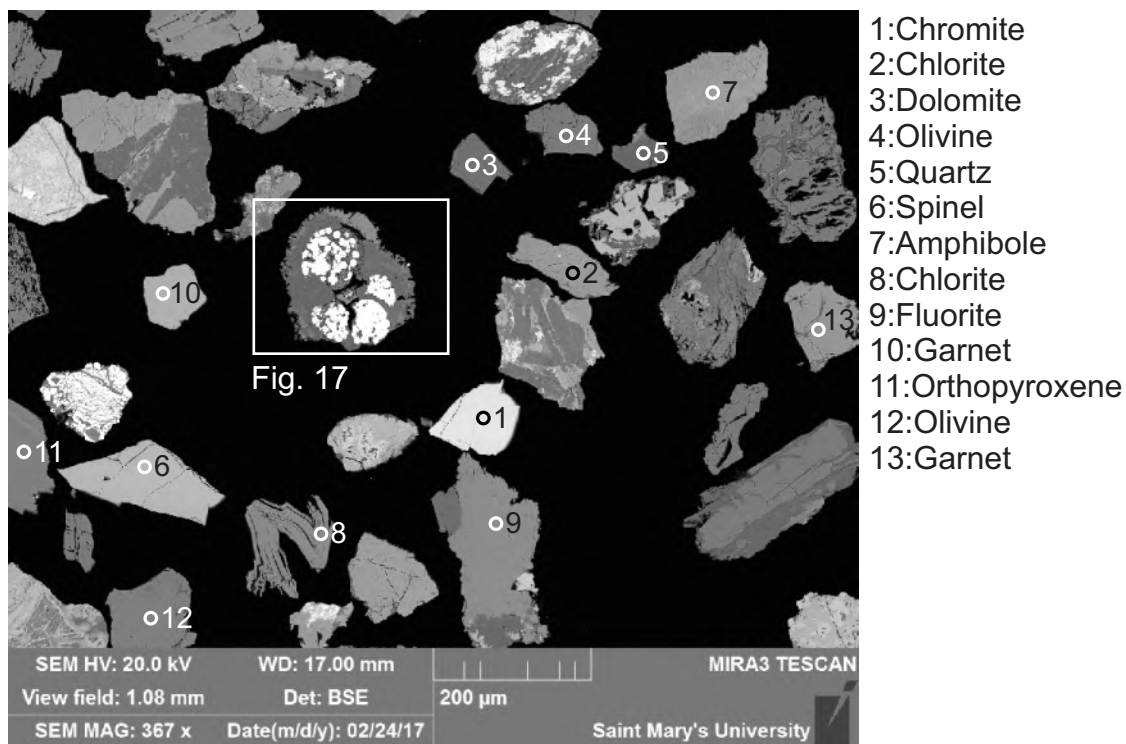

Figure B5.16: Sample 10 site 7 (SEM).

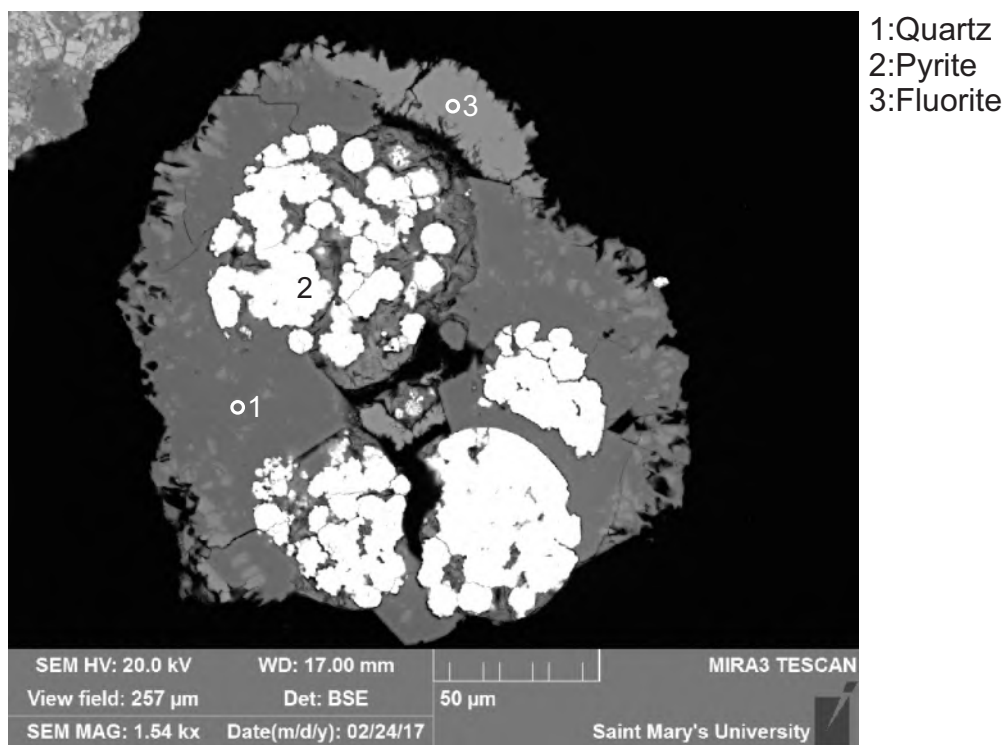

Figure B5.17: Sample 10 site 7.1 (SEM). Lithic clast consisting of quartz + fluorite + pyrite (hydrothermal).

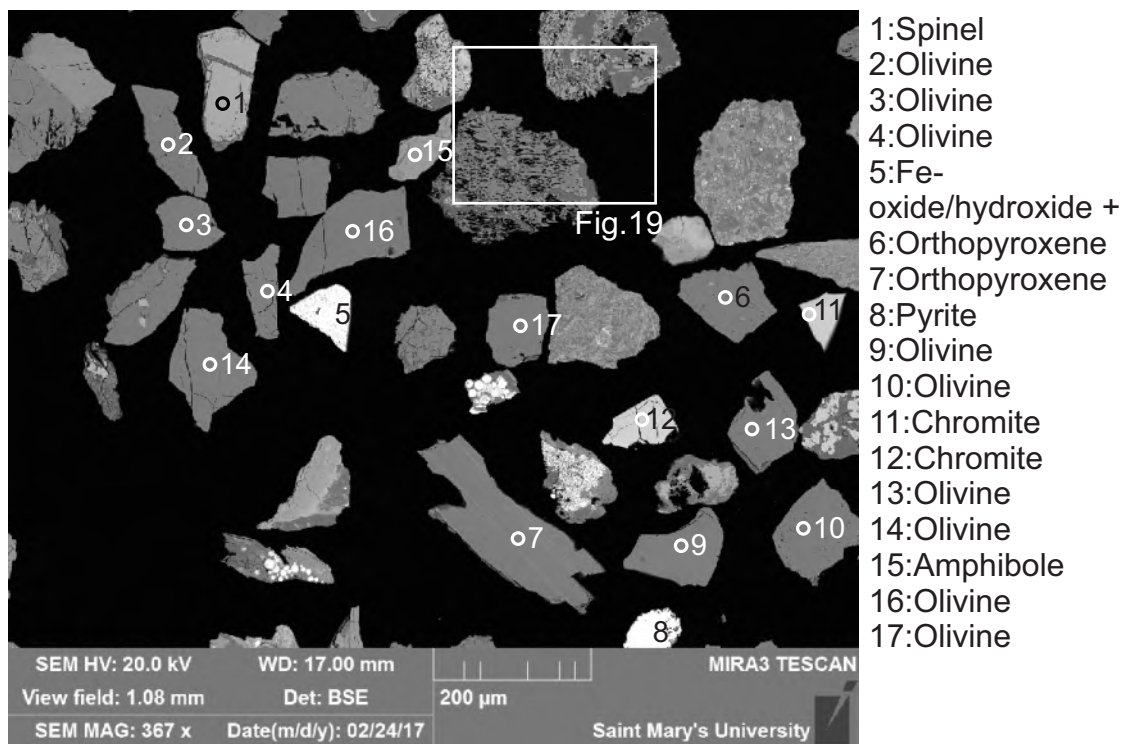

Figure B5.18: Sample 10 site 8 (SEM).

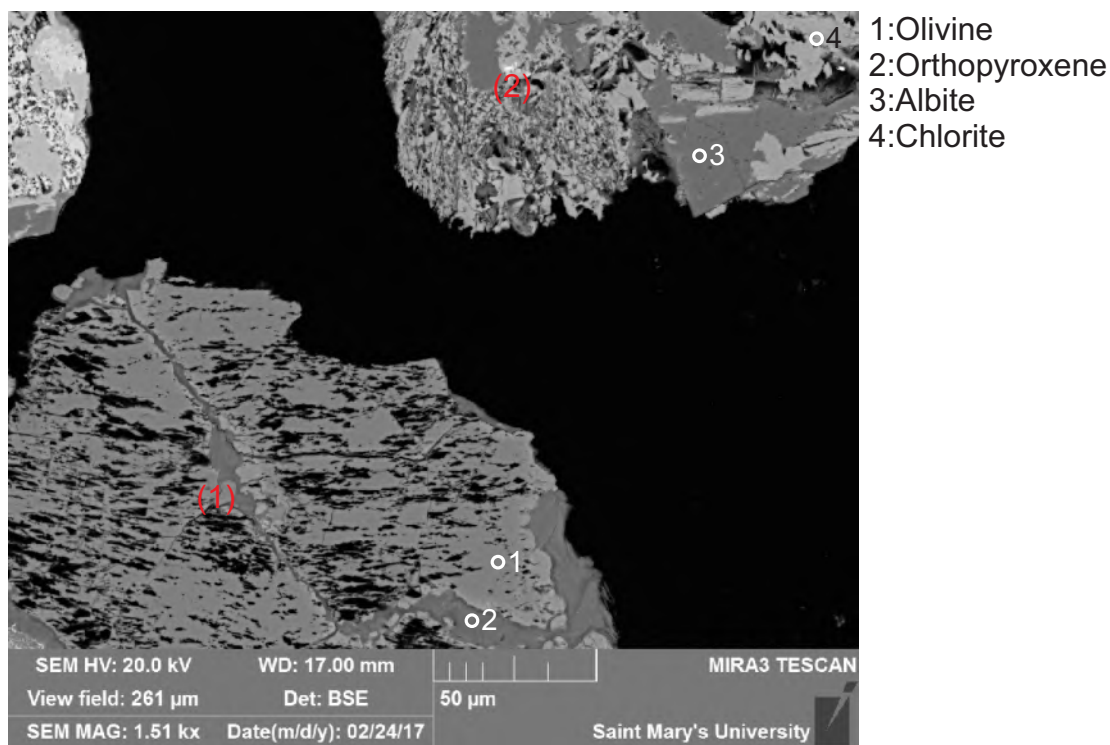

Figure B5.19: Sample 10 site 8.1 (SEM). 1: Lithic clast (olivine + pyroxene, ophiolite or metaophiolite). 2: Lithic clast (albite + chlorite, metaophiolite).



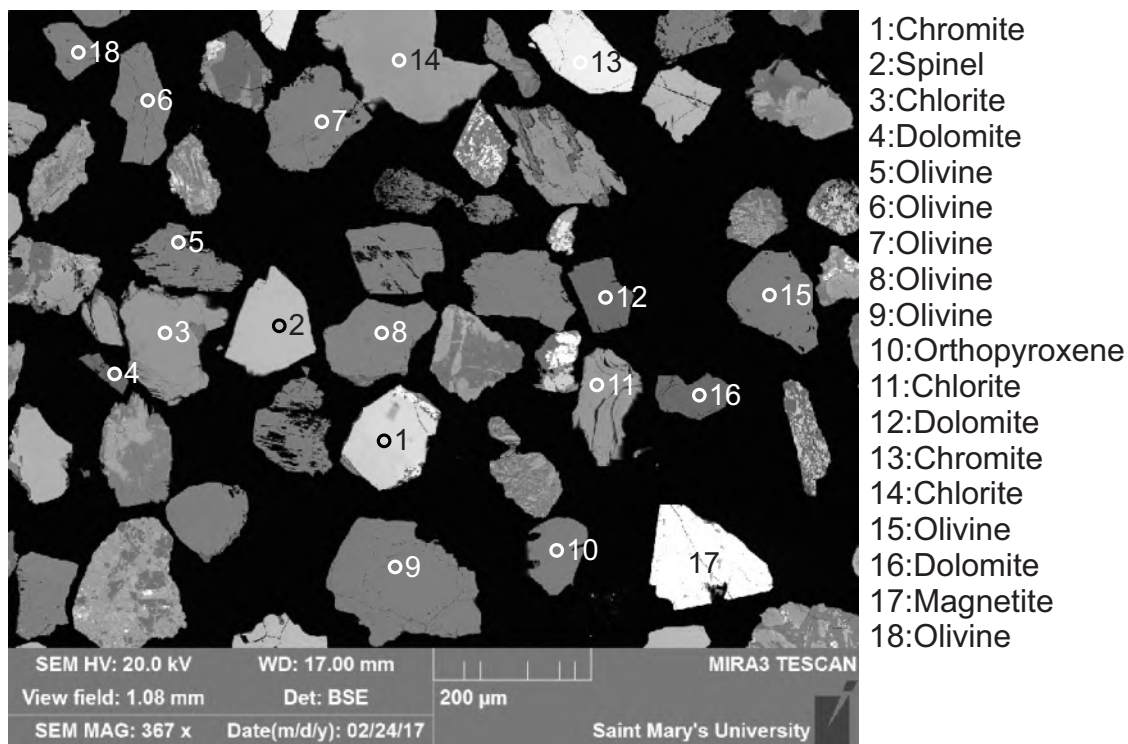

Figure B5.20: Sample 10 site 9 (SEM).

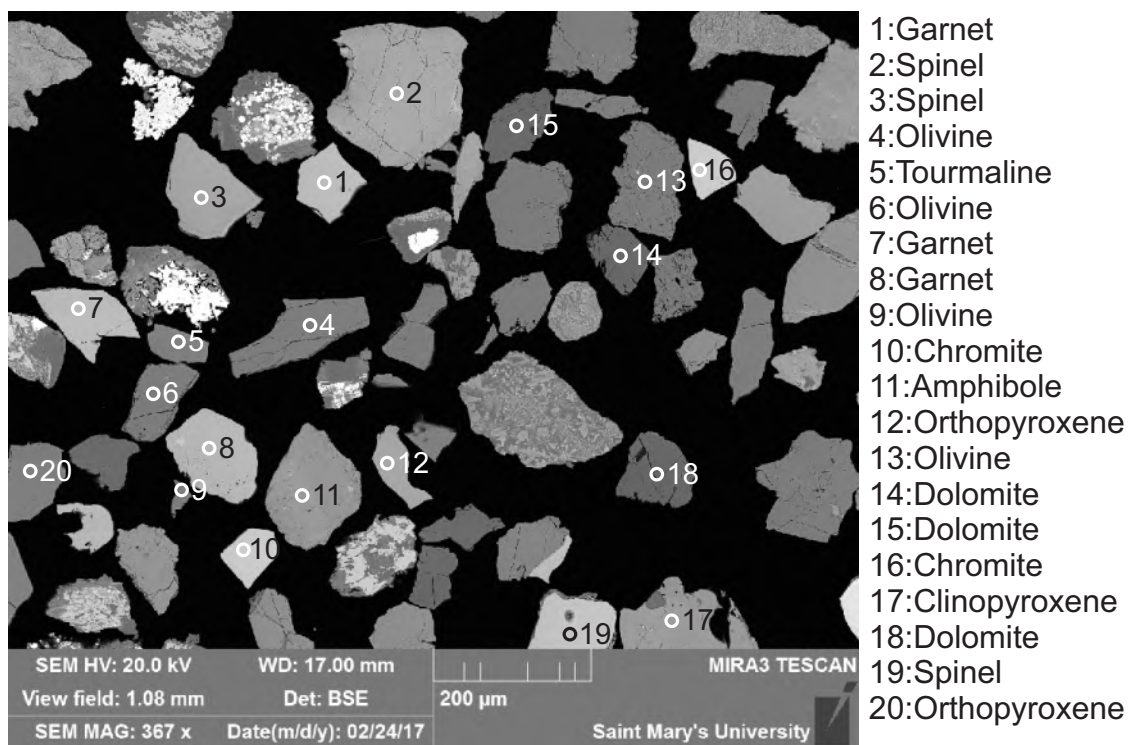

Figure B5.21: Sample 10 site 10 (SEM).



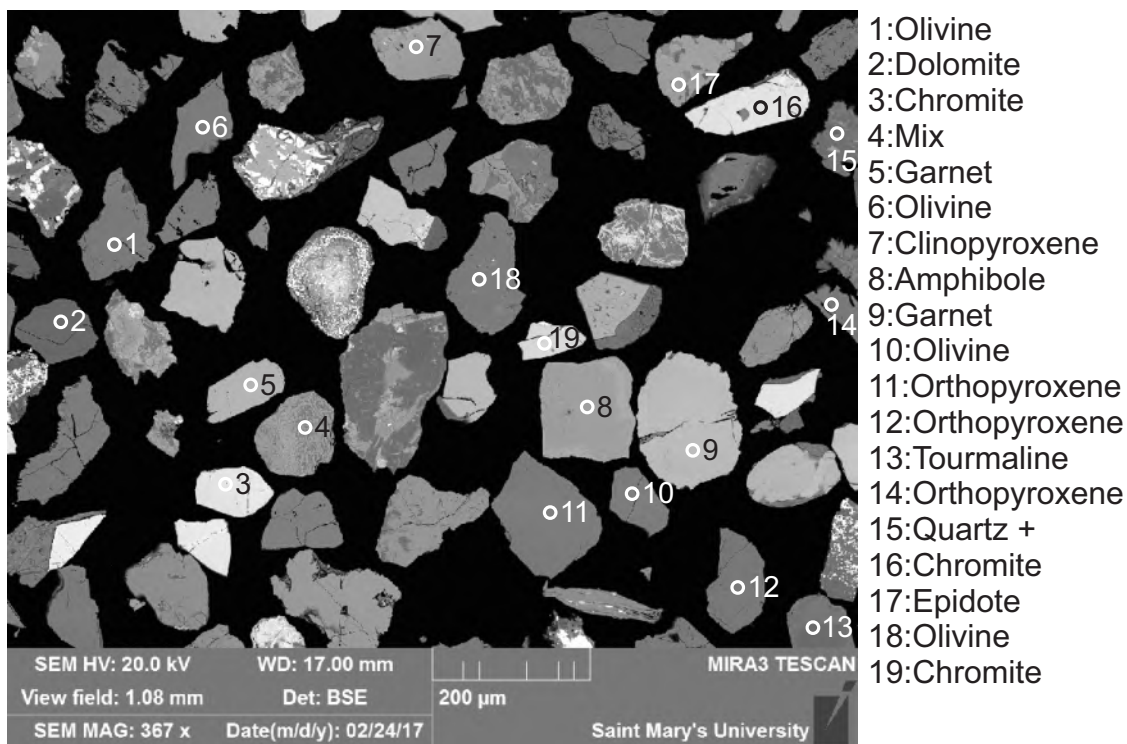

Figure B5.22: Sample 10 site 11 (SEM).

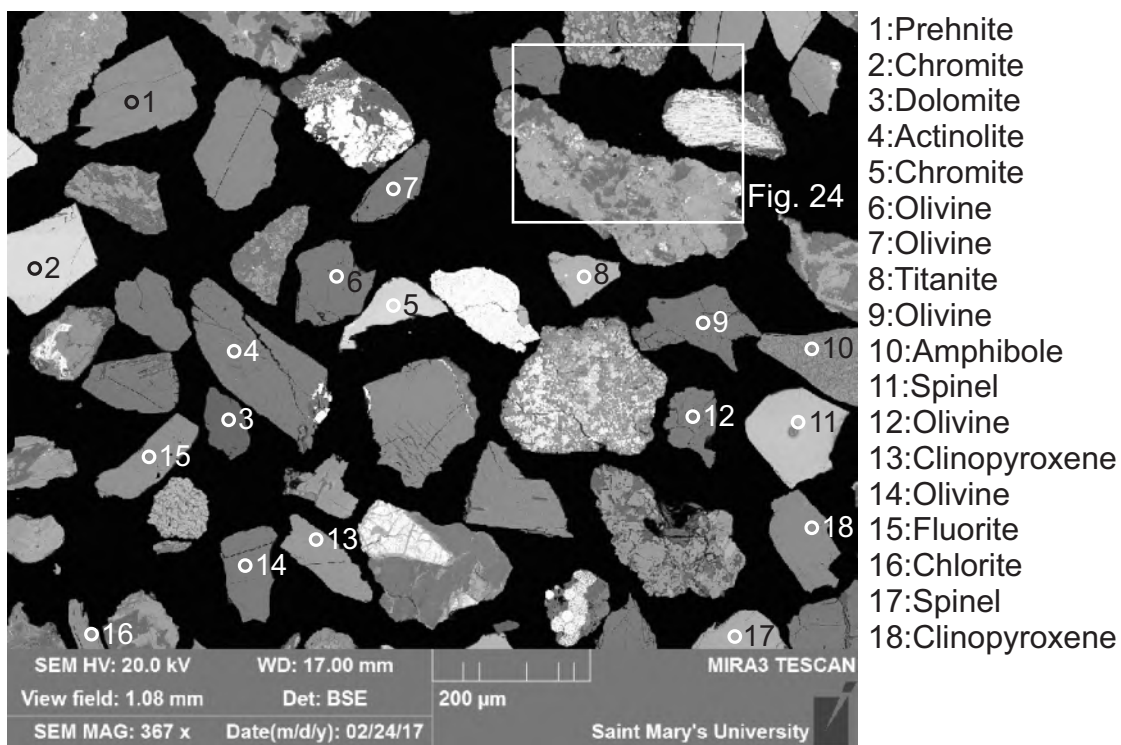

Figure B5.23: Sample 10 site 12 (SEM).

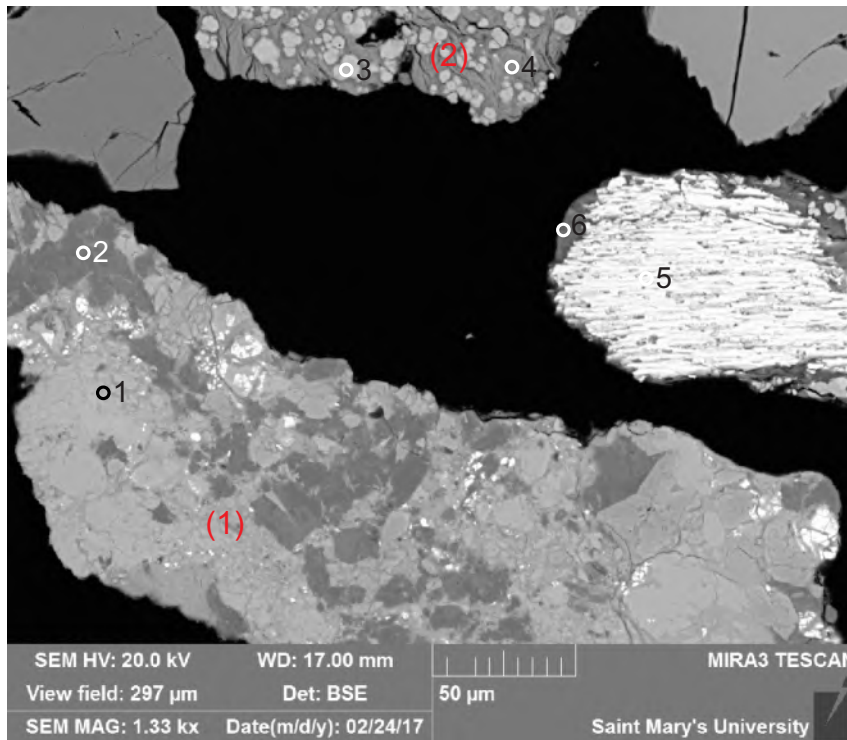

- 1: Titanite +
- 2: Oligoclase
- 3: Garnet
- 4: Chlorite +
- 5: Ilmenite +
- 6: Clay

Figure B5.24: Sample 10 site 12.1 (SEM). 1: Lithic clast (titanite + oligoclase, may be metamorphic, some textural similarity to Fig. B5.11 - hydrothermal). 2: Lithic clast (garnet + ?chlorite, metamorphic).

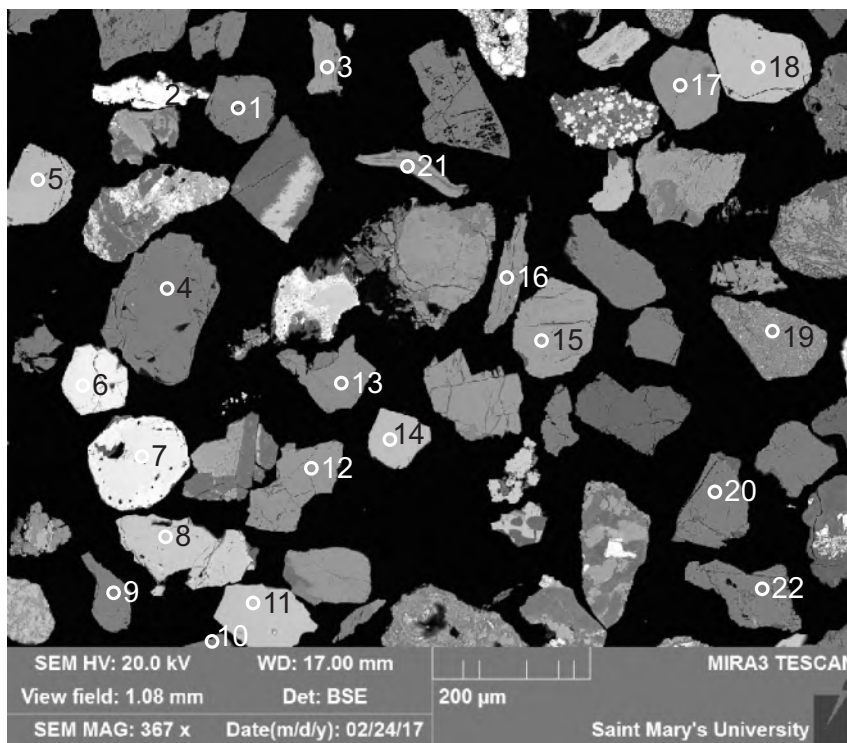

- 1: Olivine
- 2: Magnetite
- 3: Chlorite
- 4: Olivine
- 5: Garnet
- 6: Chromite
- 7: Chromite
- 8: Spinel
- 9: Olivine
- 10: Olivine
- 11: Spinel
- 12: Clinopyroxene
- 13: Clinopyroxene
- 14: Garnet
- 15: Epidote
- 16: Chlorite
- 17: ?
- 18: Garnet
- 19: Amphibole
- 20: Olivine
- 21: Chlorite
- 22: Olivine

Figure B5.25: Sample 10 site 13 (SEM).

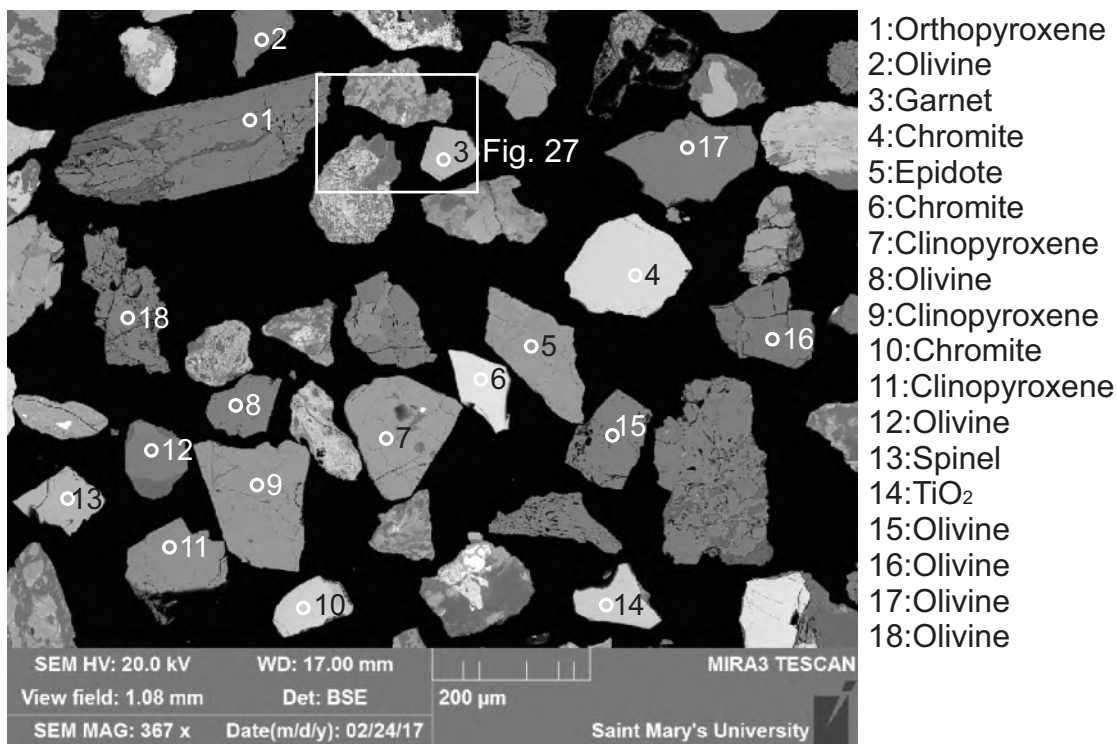

Figure B5.26: Sample 10 site 14 (SEM).

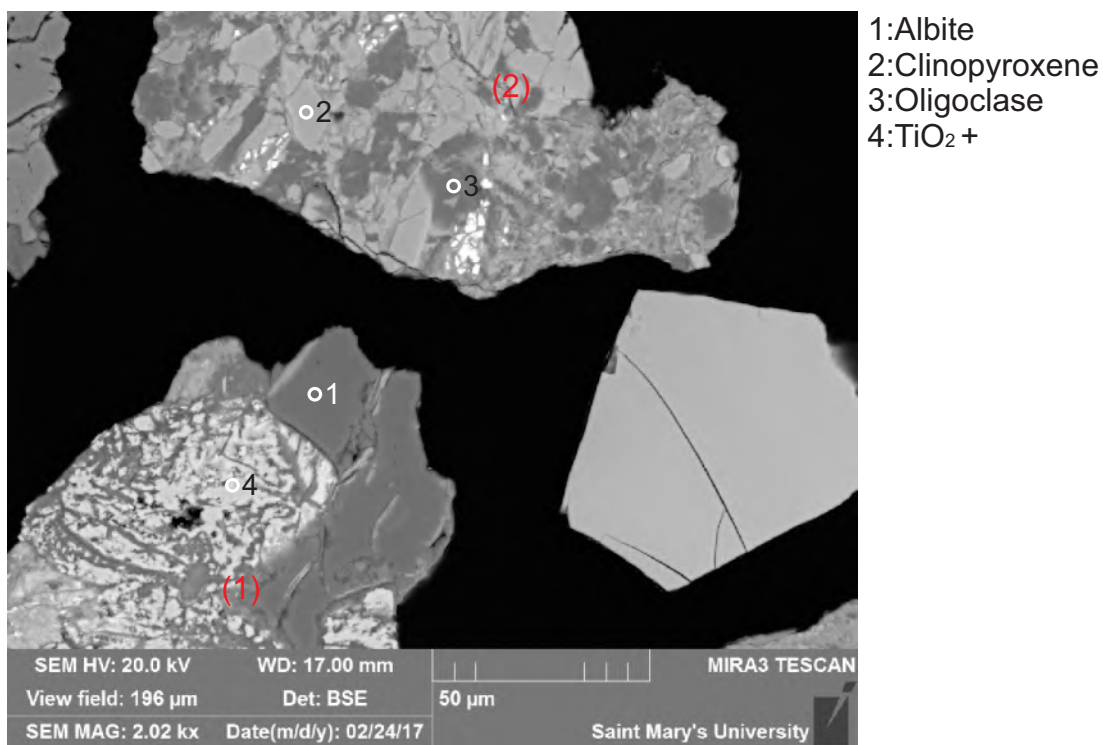

Figure B5.27: Sample 10 site 14.1 (SEM). 1: Lithic clast (albite + titania, metamorphic). 2: Lithic clast (clinopyroxene + oligoclase, similar to Fig. B5.11, hydrothermal altered igneous).



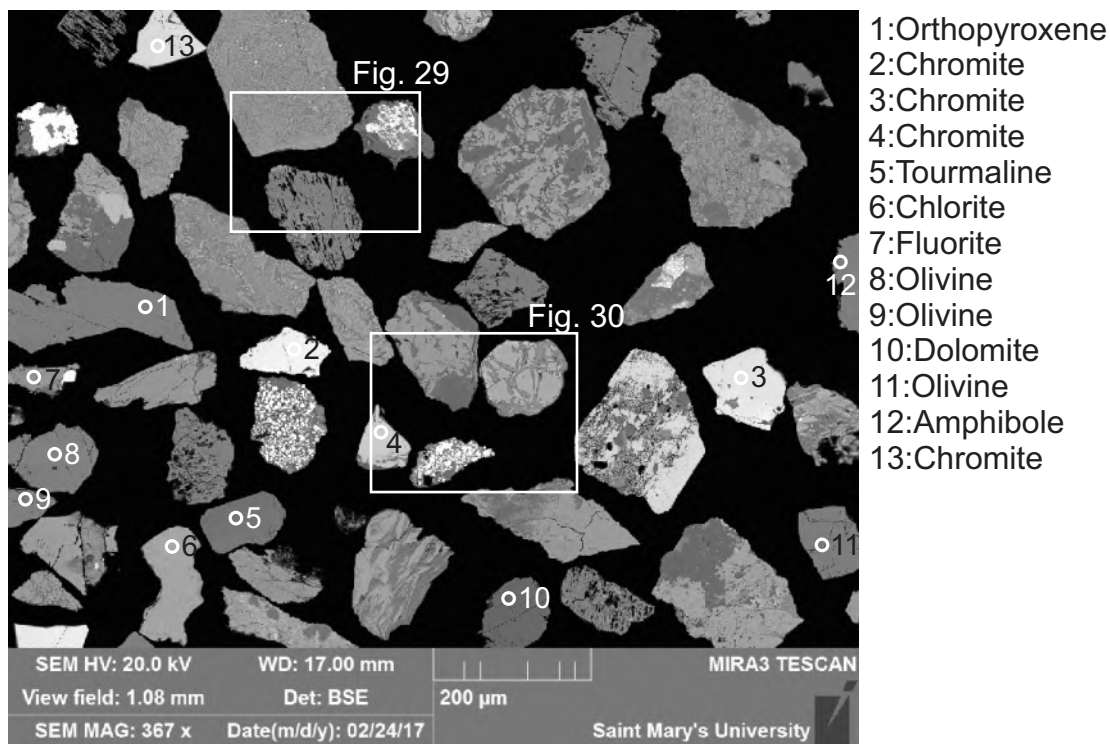

Figure B5.28: Sample 10 site 15 (SEM).

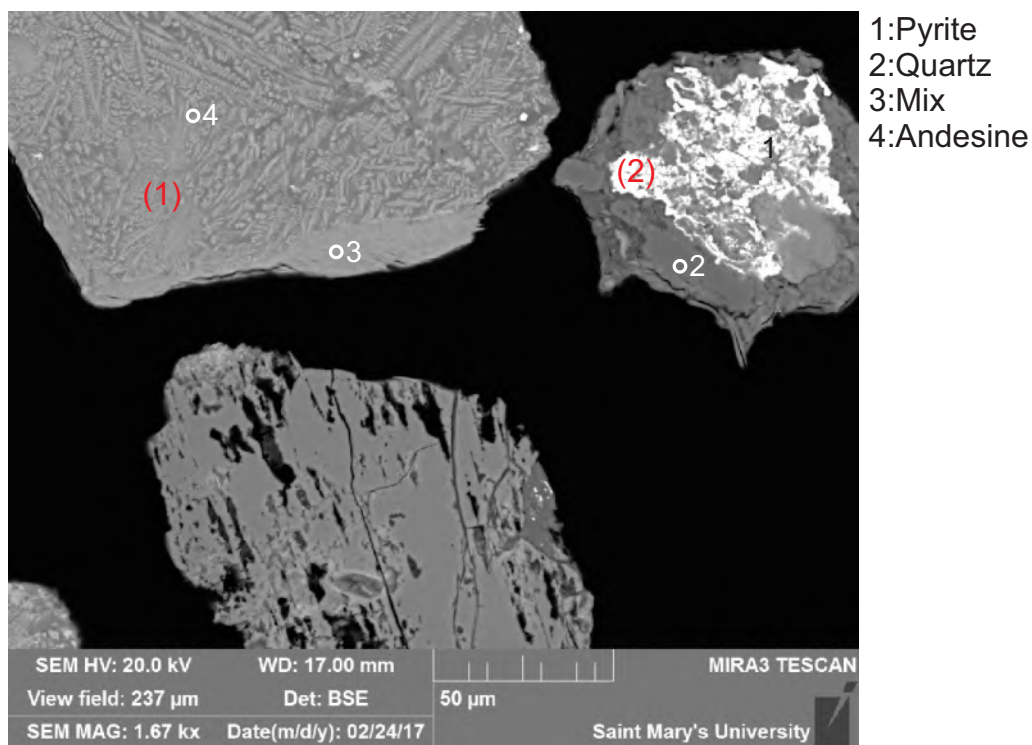

Figure B5.29: Sample 10 site 15.1 (SEM). 1: Lithic clast (chlorite + andesine, altered volcanic). 2: Lithic clast (pyrite + quartz, hydrothermal vein).



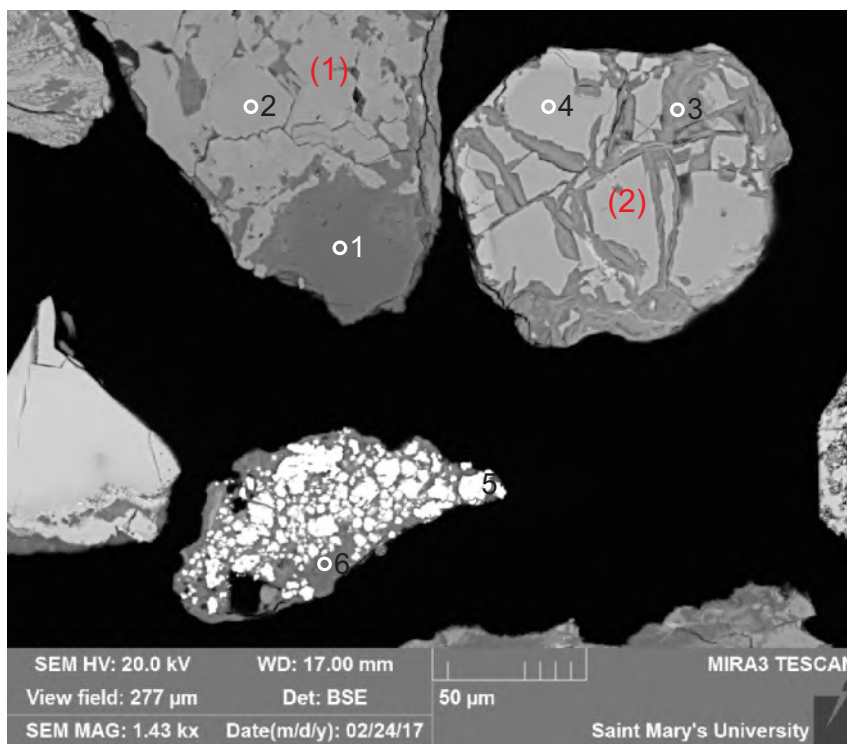

- 1:Quartz
- 2:Epidote
- 3: ?Chlorite +
- 4:Garnet
- 5:Pyrite
- 6:Quartz

Figure B5.30: Sample 10 site 15.2 (SEM). 1: Lithic clast (quartz + epidote, hydrothermal vein). 2: Lithic clast (garnet + chlorite, metamorphic).

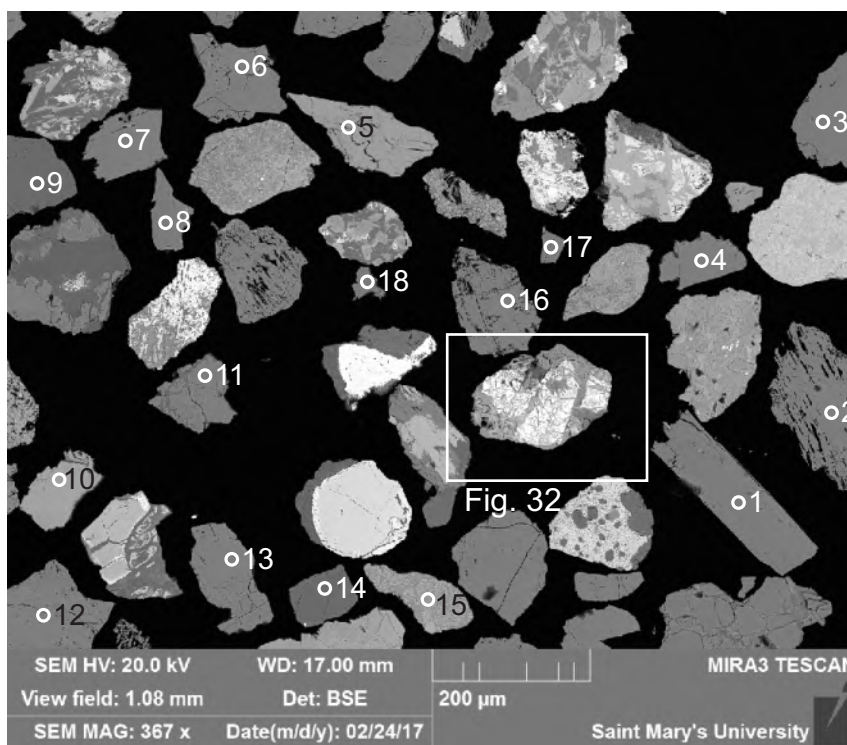

- 1:Orthopyroxene
- 2:Olivine
- 3:Olivine
- 4:Olivine
- 5:Chlorite
- 6:Olivine
- 7:Orthopyroxene
- 8:Orthopyroxene
- 9:Dolomite
- 10:Chlorite
- 11:Olivine
- 12:Olivine
- 13:Olivine
- 14:Quartz
- 15:Amphibole
- 16:Olivine
- 17:Orthopyroxene
- 18:Olivine

Figure B5.31: Sample 10 site 16 (SEM).

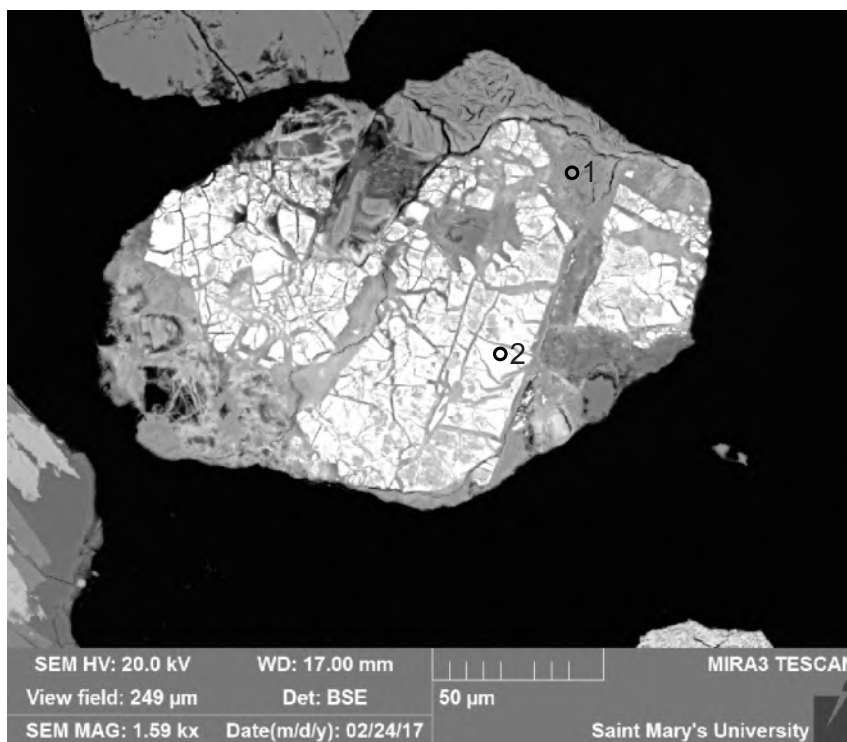

- 1:Chlorite +
- 2:Fe-oxide/hydroxide +

Figure B5.32: Sample 10 site 16.1 (SEM). Lithic clast consisting of chlorite + Fe-oxide/hydroxide, originally magnetite in hydrothermal vein, cf. Fig. B3.25.

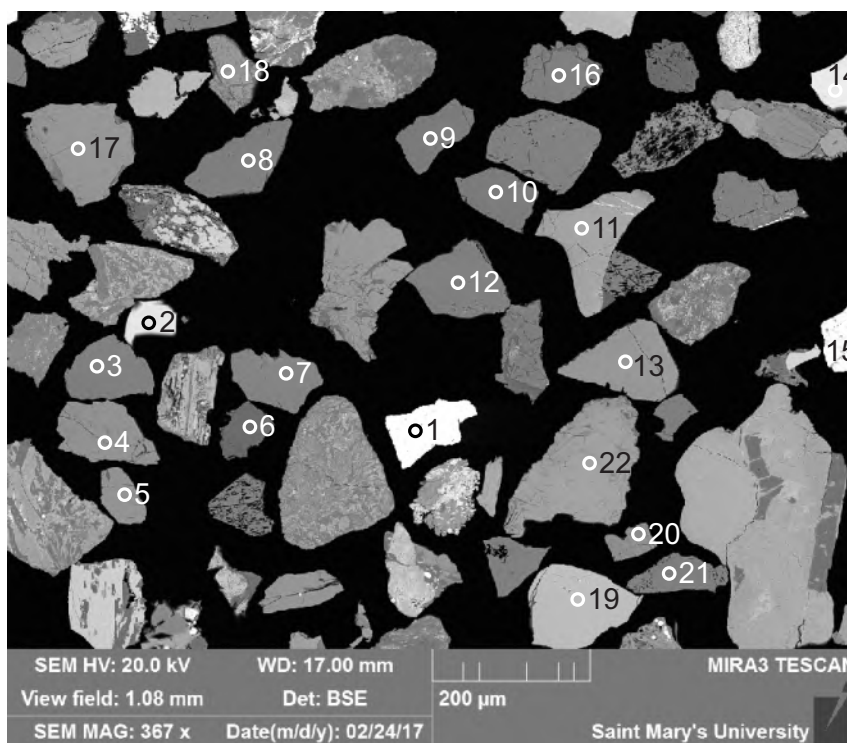

- 1:Barite
- 2:Chromite
- 3:Olivine
- 4:Clinopyroxene
- 5:Clinopyroxene
- 6:Dolomite
- 7:Olivine
- 8:Olivine
- 9:Olivine
- 10:Olivine
- 11:Spinel
- 12:Olivine
- 13:Fluorite
- 14:Chromite
- 15:"Ilmenite"
- 16:Olivine
- 17:Clinopyroxene
- 18:Epidote
- 19:Spinel
- 20:Clinopyroxene
- 21:Orthopyroxene
- 22:Chlorite

Figure B5.33: Sample 10 site 17 (SEM).

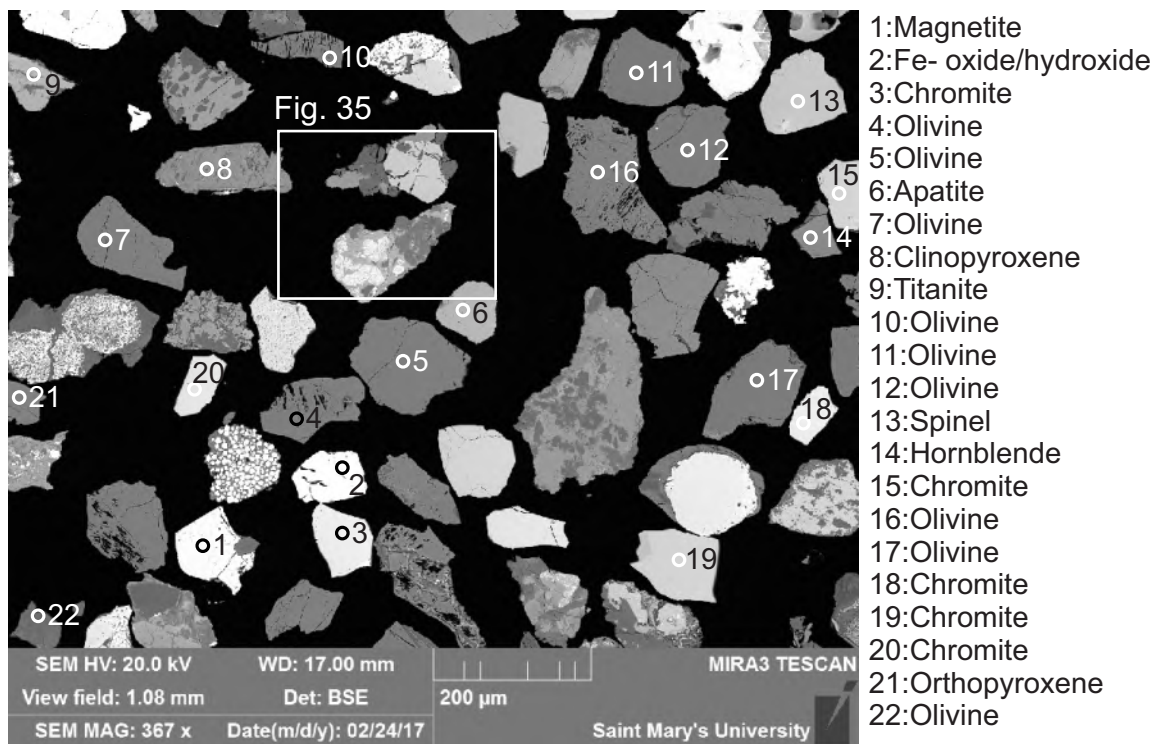

Figure B5.34: Sample 10 site 18 (SEM).

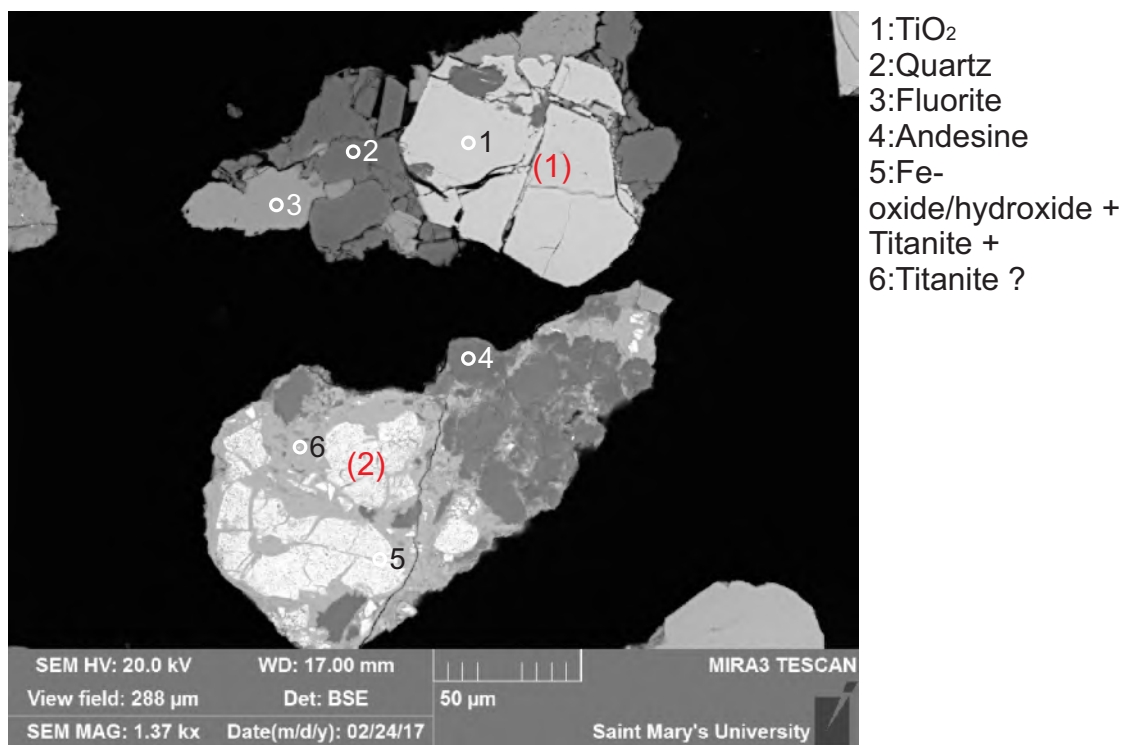

Figure B5.35: Sample 10 site 18.1 (SEM). 1: Lithic clast (quartz, fluorite, titania, hydrothermal vein). 2: Lithic clast (andesine, titanite, Fe-oxide/hydroxide, similar to Fig. B5.24, metamorphic or hydrothermal).



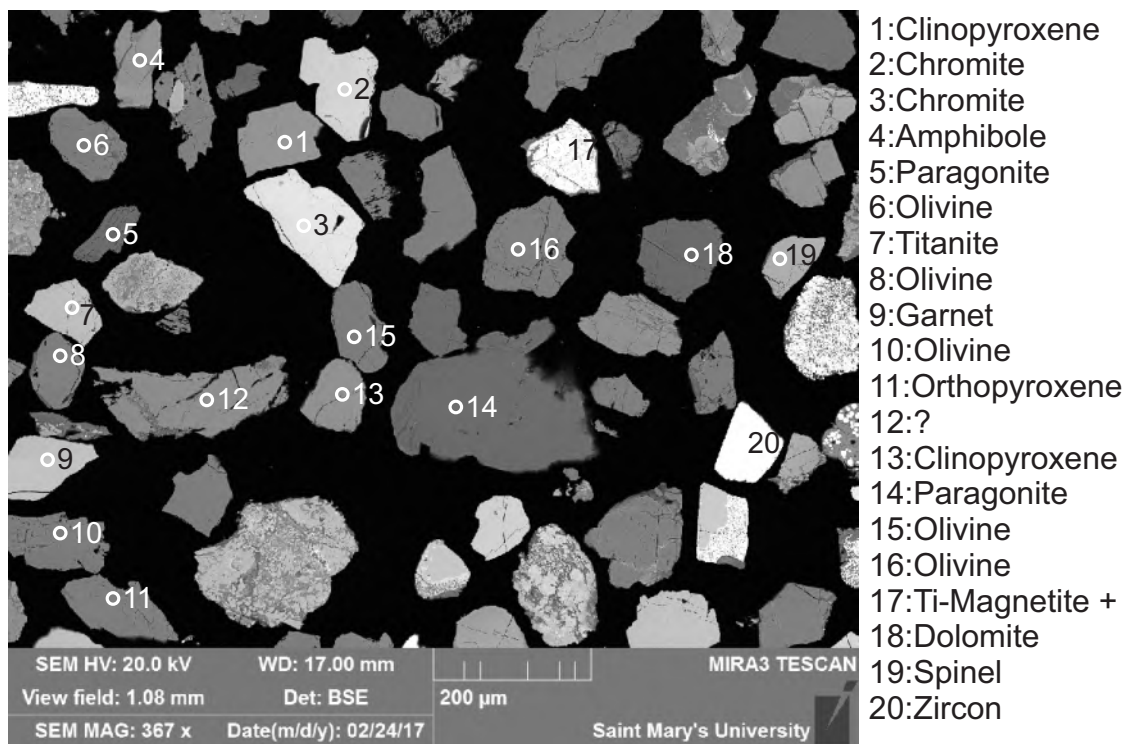

Figure B5.36: Sample 10 site 19 (SEM).

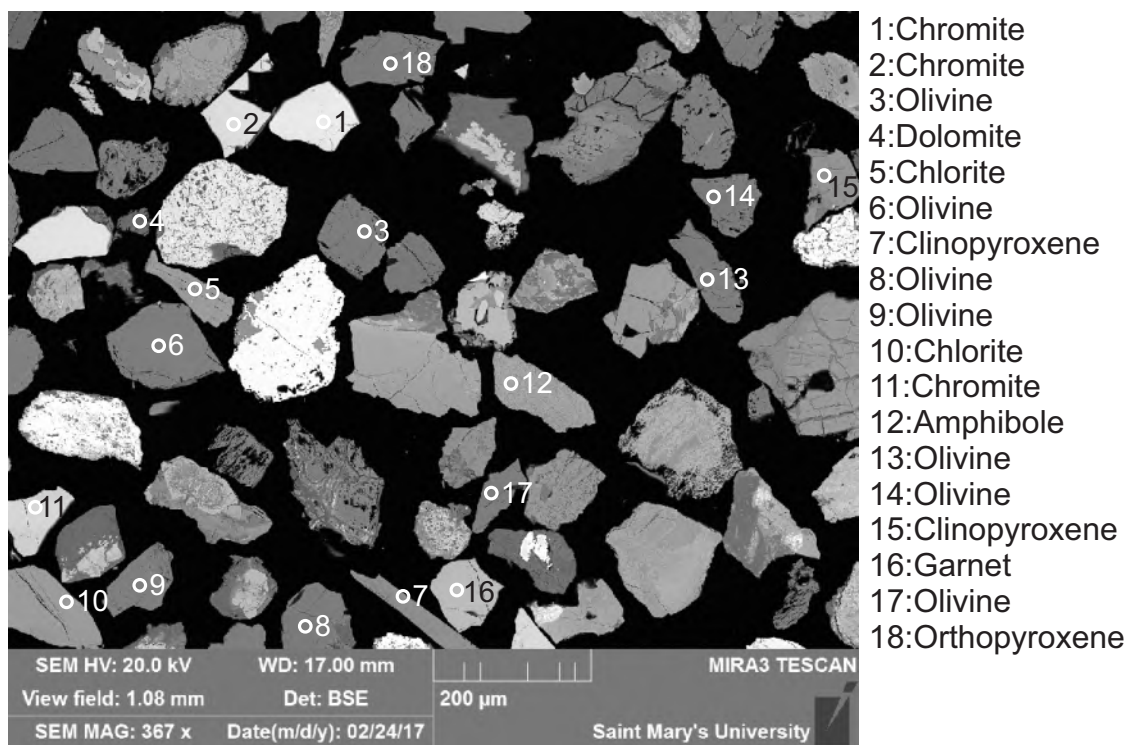

Figure B5.37: Sample 10 site 20 (SEM).



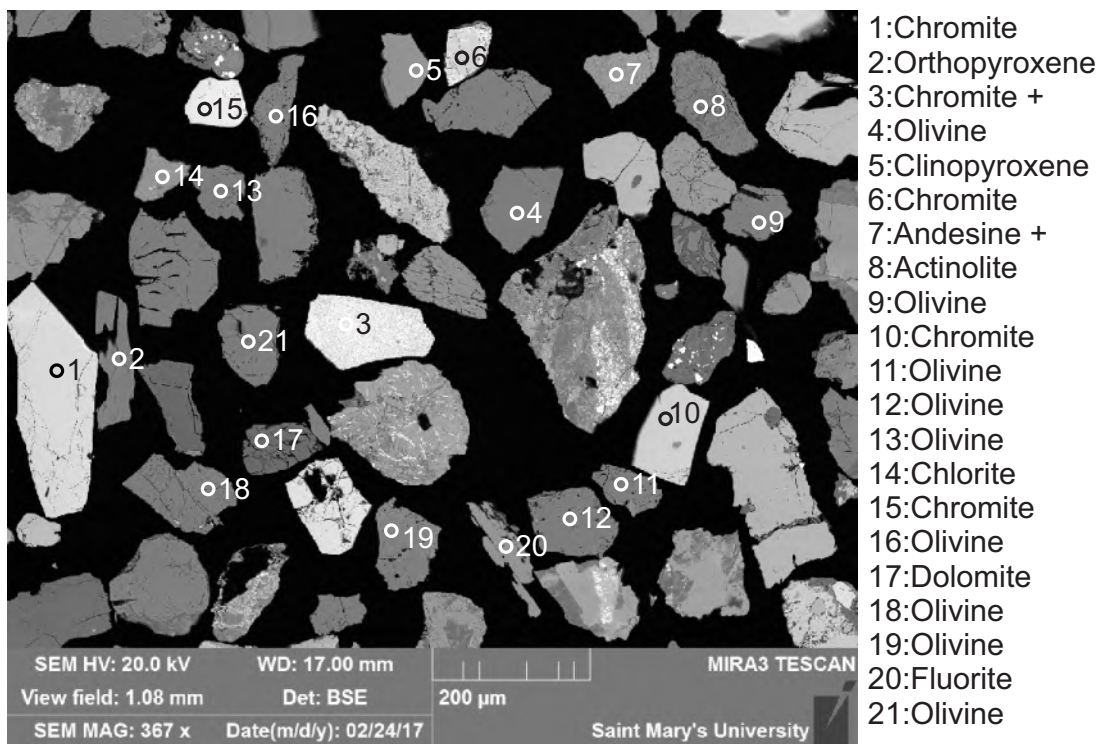

Figure B5.38: Sample 10 site 21 (SEM).

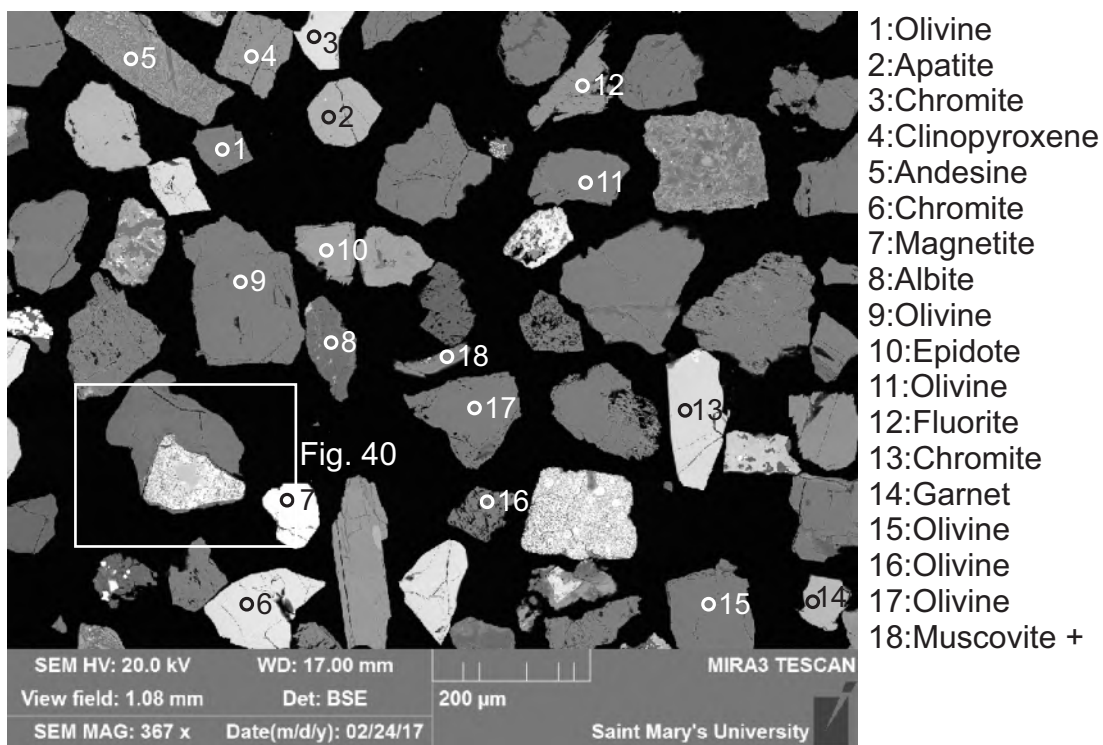

Figure B5.39: Sample 10 site 22 (SEM).

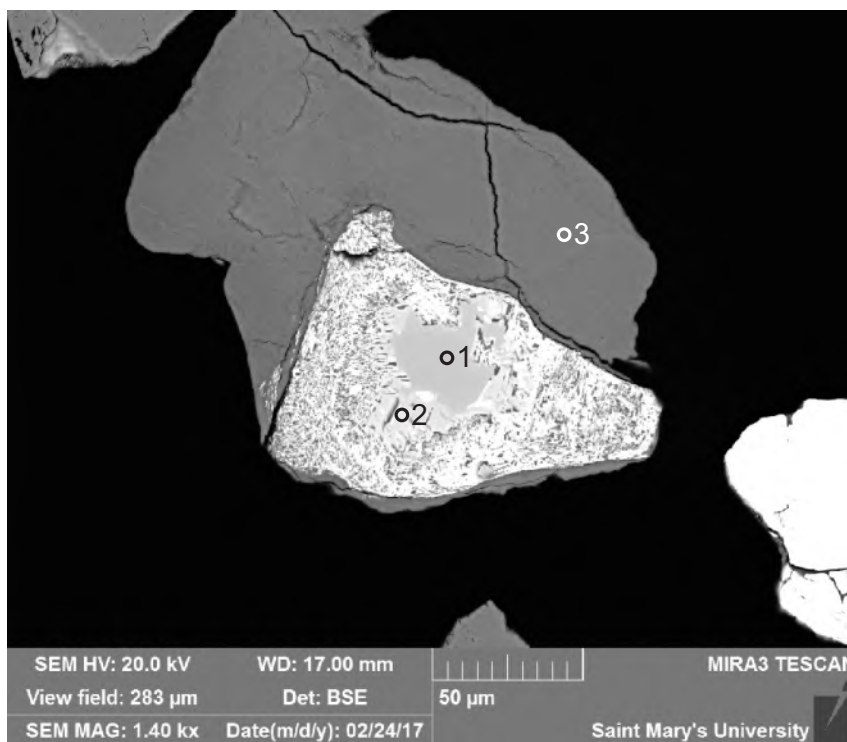

- 1: Spinel
- 2: Chromite
- 3: ?Chlorite +  
Serpentine

Figure B5.40: Sample 10 site 22.1 (SEM). Lithic clast consisting of spinel + chromite + mix (?altered olivine), ophiolite or metaophiolite.

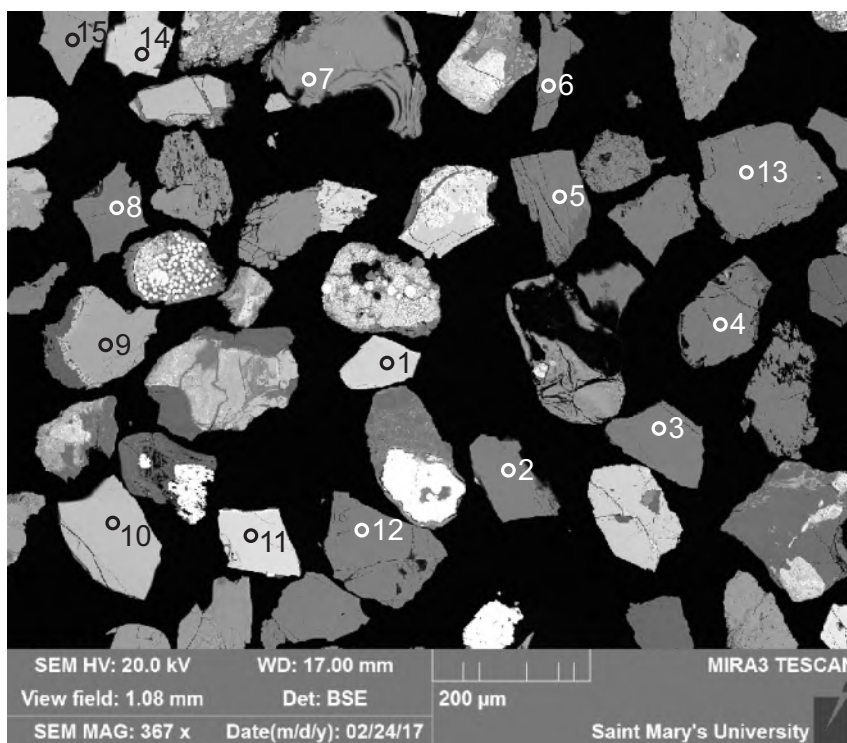

- 1: Chromite
- 2: Orthopyroxene
- 3: Orthopyroxene
- 4: Olivine
- 5: Orthopyroxene
- 6: Orthopyroxene
- 7: Chlorite
- 8: Orthopyroxene
- 9: Spinel
- 10: Spinel
- 11: Chromite
- 12: Olivine
- 13: Olivine
- 14: Chromite
- 15: Clinopyroxene

Figure B5.41: Sample 10 site 23 (SEM).

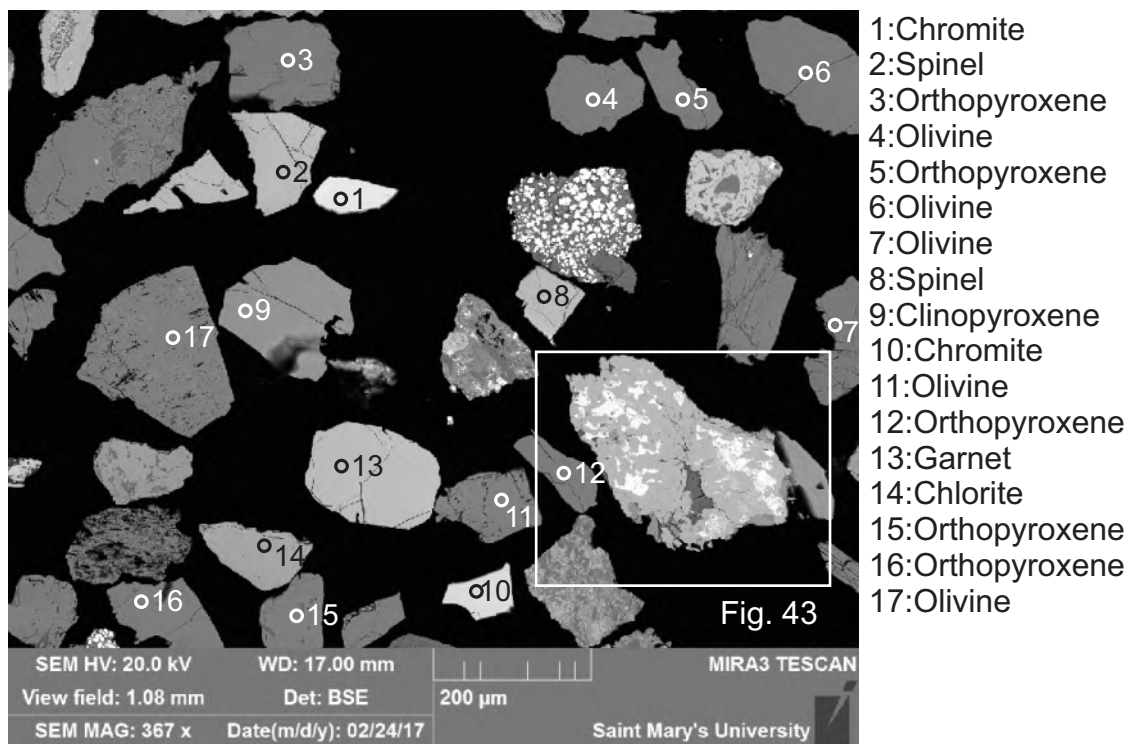

Figure B5.42: Sample 10 site 24 (SEM).

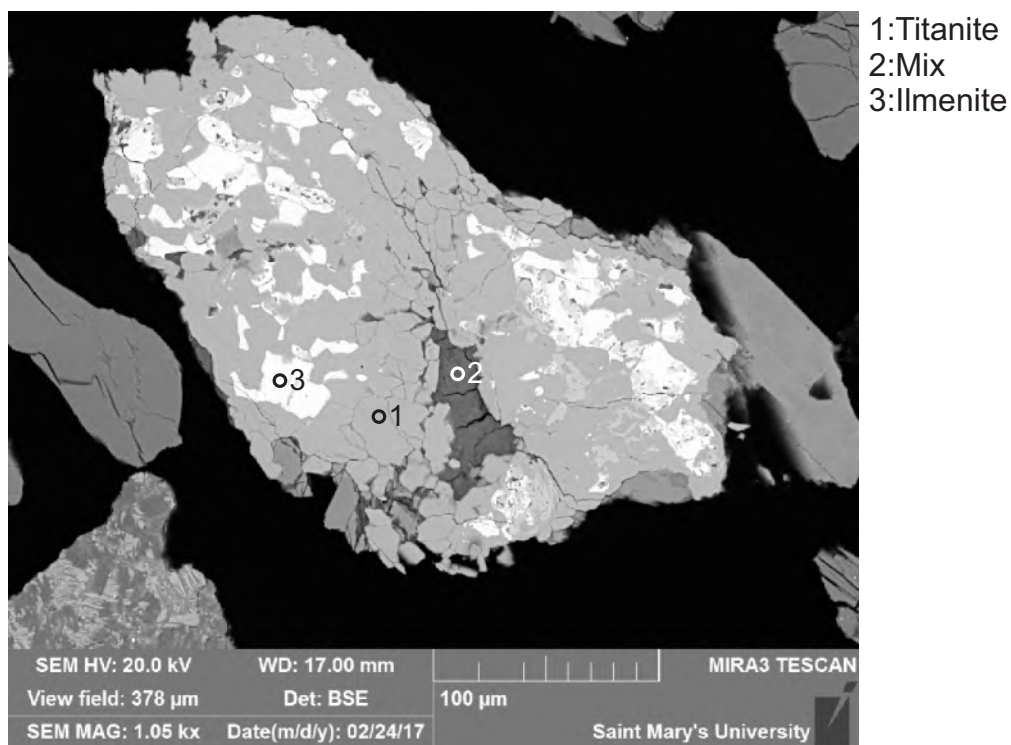

Figure B5.43: Sample 10 site 24.1 (SEM). Lithic clast of ilmenite replaced by titanite. Metamorphic.



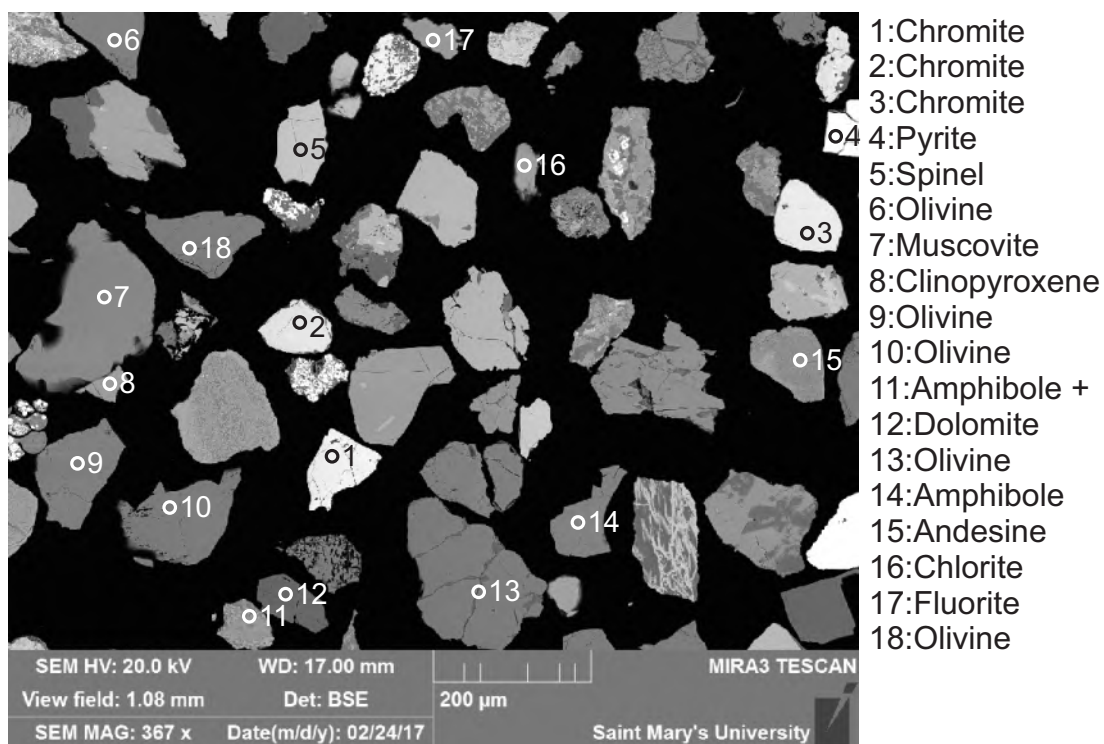

Figure B5.44: Sample 10 site 25 (SEM).

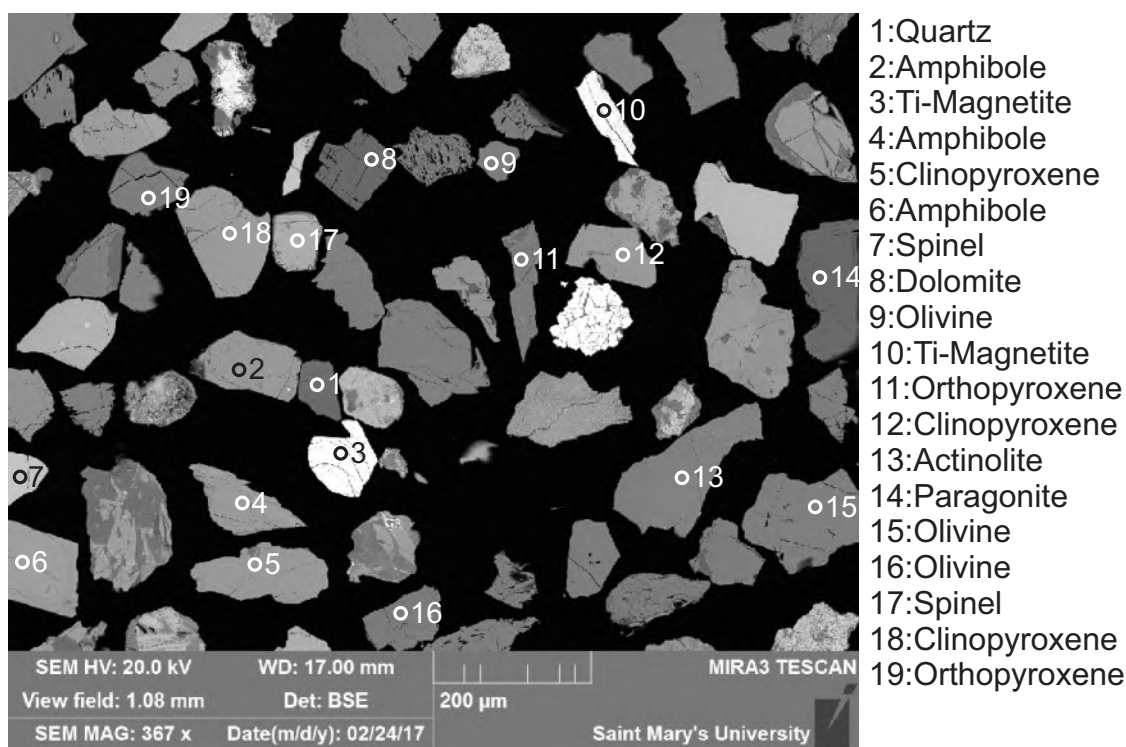

Figure B5.45: Sample 10 site 26 (SEM).



Table B5.1: EDS analyses from sample 10.

| Sample | Site | Position | Mineral | SiO2  | TiO2  | Al2O3 | FeO   | MnO  | MgO   | CaO   | Na2O  | K2O  | P2O5  | SO3 | F     | Cl | V2O5 | Cr2O3 | NiO  | PtO2 | Total | Actual Total |
|--------|------|----------|---------|-------|-------|-------|-------|------|-------|-------|-------|------|-------|-----|-------|----|------|-------|------|------|-------|--------------|
| S10    | 3.2  | 1        | Qz      | 99.76 |       |       | 0.24  |      |       |       |       |      |       |     |       |    |      |       |      |      | 100   | 128          |
| S10    | 3.2  | 2        | Ab      | 65.21 | 0.66  | 17.25 | 2.87  |      | 1.01  | 2.27  | 10.74 |      |       |     |       |    |      |       |      |      | 100   | 128          |
| S10    | 3.2  | 3        | Ttn +   | 34.50 | 23.37 | 6.83  | 6.95  |      | 2.75  | 23.90 |       |      | 1.70  |     |       |    |      |       |      |      | 100   | 116          |
| S10    | 3.2  | 4        | Cpx     | 49.78 | 2.23  | 5.29  | 11.82 | 0.28 | 14.23 | 15.93 | 0.44  |      |       |     |       |    |      |       |      |      | 100   | 123          |
| S10    | 3.2  | 5        | Ab      | 65.74 |       | 21.01 | 0.76  |      |       | 2.18  | 9.80  | 0.51 |       |     |       |    |      |       |      |      | 100   | 127          |
| S10    | 3.1  | 1        | Chl     | 27.46 | 0.24  | 20.10 | 17.54 | 0.25 | 19.10 |       |       |      |       |     |       |    |      | 0.31  |      |      | 85    | 105          |
| S10    | 3.1  | 2        | TiO2    |       | 98.62 |       | 0.89  |      |       | 0.49  |       |      |       |     |       |    |      |       |      |      | 100   | 115          |
| S10    | 3.1  | 3        | Qz      | 99.82 |       |       |       |      |       | 0.18  |       |      |       |     |       |    |      |       |      |      | 100   | 130          |
| S10    | 3.1  | 4        | Fl      |       | 1.36  |       | 1.48  |      | 0.36  | 60.93 |       |      |       |     | 35.87 |    |      |       |      |      | 100   | 100          |
| S10    | 3    | 1        | Chr     |       |       | 15.65 | 23.01 |      | 10.97 |       |       |      |       |     |       |    |      | 50.38 |      |      | 100   | 112          |
| S10    | 3    | 2        | Grt     | 39.25 |       | 20.62 | 27.25 | 7.73 | 0.91  | 4.24  |       |      |       |     |       |    |      |       |      |      | 100   | 118          |
| S10    | 3    | 3        | Ol      | 42.06 |       |       | 6.87  |      | 50.64 |       |       |      |       |     |       |    |      |       | 0.43 |      | 100   | 123          |
| S10    | 3    | 4        | Ol      | 41.90 |       |       | 8.85  |      | 48.93 |       |       |      |       |     |       |    |      |       | 0.32 |      | 100   | 121          |
| S10    | 3    | 5        | Chr     |       |       | 22.60 | 19.25 |      | 12.60 |       |       |      |       |     |       |    | 0.40 | 45.15 |      |      | 100   | 114          |
| S10    | 3    | 6        | Ap      |       |       |       |       |      |       | 48.66 |       |      | 44.55 |     | 6.79  |    |      |       |      |      | 100   | 130          |
| S10    | 3    | 7        | Ol      | 42.07 |       |       | 7.33  |      | 50.26 |       |       |      |       |     |       |    |      |       | 0.34 |      | 100   | 125          |
| S10    | 3    | 8        | Ti-Mag  |       | 18.83 | 3.70  | 72.48 | 0.57 | 3.03  |       |       |      |       |     |       |    | 1.38 |       |      |      | 100   | 108          |
| S10    | 3    | 9        | Dol     |       |       |       |       |      | 21.92 | 30.96 |       |      |       |     | 1.12  |    |      |       |      |      | 54    | 61           |
| S10    | 3    | 10       | Dol     |       |       |       |       |      | 22.61 | 31.39 |       |      |       |     |       |    |      |       |      |      | 54    | 61           |
| S10    | 3    | 11       | Ol      | 41.67 |       |       | 9.02  |      | 48.98 |       |       |      |       |     |       |    |      |       | 0.33 |      | 100   | 129          |
| S10    | 3    | 12       | Opx     | 57.59 |       | 2.10  | 5.22  |      | 34.37 | 0.31  |       |      |       |     |       |    |      | 0.41  |      |      | 100   | 132          |
| S10    | 3    | 13       | Ol      | 41.75 |       |       | 8.28  |      | 49.59 |       |       |      |       |     |       |    |      |       | 0.37 |      | 100   | 127          |
| S10    | 3    | 14       | Ol      | 41.93 |       |       | 8.03  |      | 49.67 |       |       |      |       |     |       |    |      |       | 0.38 |      | 100   | 125          |
| S10    | 3    | 15       | Ol      | 42.36 |       |       | 7.37  |      | 49.93 |       |       |      |       |     |       |    |      |       | 0.34 |      | 100   | 126          |
| S10    | 3    | 16       | Chr     |       |       | 15.69 | 18.92 |      | 10.97 |       |       |      |       |     |       |    | 0.40 | 54.02 |      |      | 100   | 116          |
| S10    | 2.1  | 1        | Cpx     | 52.33 | 1.15  | 3.39  | 9.49  | 0.28 | 15.34 | 17.46 | 0.56  |      |       |     |       |    |      |       |      |      | 100   | 123          |
| S10    | 2.1  | 2        | Ab      | 66.17 |       | 20.90 | 0.45  |      |       | 1.77  | 9.92  | 0.80 |       |     |       |    |      |       |      |      | 100   | 126          |
| S10    | 2.1  | 3        | Ab      | 67.43 |       | 20.10 | 0.42  |      |       | 1.06  | 10.27 | 0.71 |       |     |       |    |      |       |      |      | 100   | 126          |
| S10    | 2.1  | 4        | Ab      | 66.28 |       | 18.84 | 1.44  |      | 2.33  | 0.93  | 10.17 |      |       |     |       |    |      |       |      |      | 100   | 124          |
| S10    | 2.1  | 5        | Amph    | 51.82 | 0.35  | 4.89  | 14.57 |      | 13.60 | 11.20 | 0.57  |      |       |     |       |    |      |       |      |      | 97    | 117          |
| S10    | 2    | 1        | Act     | 55.88 |       | 1.77  | 5.09  |      | 33.16 | 0.47  |       |      |       |     |       |    |      | 0.64  |      |      | 97    | 126          |

Table B5.1: EDS analyses from sample 10.

| Sample | Site | Position | Mineral | SiO2  | TiO2 | Al2O3 | FeO   | MnO  | MgO   | CaO   | Na2O | K2O | P2O5 | SO3   | F | Cl   | V2O5 | Cr2O3 | NiO  | PtO2 | Total | Actual Total |
|--------|------|----------|---------|-------|------|-------|-------|------|-------|-------|------|-----|------|-------|---|------|------|-------|------|------|-------|--------------|
| S10    | 2    | 2        | Amph    | 50.21 | 1.19 | 6.77  | 12.27 | 0.31 | 14.16 | 10.87 | 1.21 |     |      |       |   |      |      |       |      |      | 97    | 123          |
| S10    | 2    | 3        | Ol      | 41.82 |      |       | 7.55  |      | 50.13 |       |      |     |      |       |   |      |      |       | 0.51 |      | 100   | 129          |
| S10    | 2    | 4        | Act     | 57.13 |      | 2.68  | 2.58  |      | 22.67 | 11.20 | 0.34 |     |      |       |   |      |      | 0.41  |      |      | 97    | 127          |
| S10    | 2    | 5        | Amph    | 47.12 | 1.98 | 8.99  | 12.65 | 0.22 | 13.46 | 10.59 | 1.98 |     |      |       |   |      |      |       |      |      | 97    | 121          |
| S10    | 2    | 6        | Ol      | 41.71 |      |       | 8.71  |      | 49.16 |       |      |     |      |       |   |      |      |       | 0.42 |      | 100   | 123          |
| S10    | 2    | 7        | Grt     | 40.13 |      | 21.22 | 22.00 | 5.71 | 3.63  | 7.31  |      |     |      |       |   |      |      |       |      |      | 100   | 120          |
| S10    | 2    | 8        | Spl     |       | 0.31 | 27.43 | 20.83 |      | 13.27 |       |      |     |      |       |   |      |      | 38.17 |      |      | 100   | 120          |
| S10    | 2    | 9        | Grt     | 39.77 |      | 20.74 | 28.45 | 6.68 | 2.94  | 1.41  |      |     |      |       |   |      |      |       |      |      | 100   | 125          |
| S10    | 2    | 10       | Opx     | 57.63 |      | 1.99  | 5.45  |      | 34.23 | 0.36  |      |     |      |       |   |      |      | 0.34  |      |      | 100   | 128          |
| S10    | 2    | 11       | Spl     |       |      | 48.53 | 13.78 |      | 18.52 |       |      |     |      |       |   |      |      | 19.17 |      |      | 100   | 121          |
| S10    | 2    | 12       | Ol      | 42.25 |      |       | 9.71  |      | 47.70 |       |      |     |      |       |   |      |      |       | 0.33 |      | 100   | 112          |
| S10    | 2    | 13       | Ol      | 42.18 |      |       | 7.42  |      | 50.08 |       |      |     |      |       |   |      |      |       | 0.32 |      | 100   | 123          |
| S10    | 2    | 14       | Cpx     | 52.92 | 1.35 | 2.55  | 9.01  | 0.29 | 14.19 | 19.13 | 0.56 |     |      |       |   |      |      |       |      |      | 100   | 124          |
| S10    | 2    | 15       | Ol      | 42.04 |      |       | 8.80  |      | 48.89 |       |      |     |      |       |   |      |      |       | 0.27 |      | 100   | 116          |
| S10    | 2    | 16       | Opx     | 55.08 | 0.40 | 1.14  | 15.85 | 0.56 | 24.05 | 2.92  |      |     |      |       |   |      |      |       |      |      | 100   | 125          |
| S10    | 1.2  | 1        | Ol      | 41.91 |      |       | 8.66  |      | 49.11 |       |      |     |      |       |   |      |      |       | 0.32 |      | 100   | 128          |
| S10    | 1.2  | 2        | Ol      | 49.07 |      |       | 5.41  |      | 45.21 |       |      |     |      |       |   |      |      |       | 0.32 |      | 100   | 107          |
| S10    | 1.1  | 1        | Py      | 1.00  |      | 0.31  | 30.56 |      | 0.45  |       | 0.22 |     |      | 65.93 |   |      |      |       |      | 1.52 | 100   | 224          |
| S10    | 1.1  | 2        | Amph    | 49.98 | 1.36 | 2.18  | 15.69 | 0.45 | 11.87 | 15.15 | 0.31 |     |      |       |   |      |      |       |      |      | 97    | 123          |
| S10    | 1.1  | 3        | Olig    | 61.28 |      | 20.26 | 2.35  |      | 1.06  | 5.38  | 8.25 |     | 1.42 |       |   |      |      |       |      |      | 100   | 126          |
| S10    | 1    | 1        | Ol      | 42.39 |      |       | 6.38  |      | 50.83 |       |      |     |      |       |   |      |      |       | 0.40 |      | 100   | 127          |
| S10    | 1    | 2        | Ol      | 41.98 |      |       | 7.57  |      | 50.09 |       |      |     |      |       |   |      |      |       | 0.36 |      | 100   | 125          |
| S10    | 1    | 3        | Amph    | 46.29 | 1.21 | 10.40 | 5.74  |      | 19.60 | 9.91  | 2.29 |     |      |       |   | 0.25 |      | 1.30  |      |      | 97    | 118          |
| S10    | 1    | 4        | Chr     |       |      | 24.53 | 16.22 |      | 13.86 |       |      |     |      |       |   |      |      | 45.39 |      |      | 100   | 119          |
| S10    | 1    | 5        | Chl     | 25.90 |      | 21.31 | 23.36 |      | 14.20 |       |      |     |      |       |   |      |      | 0.24  |      |      | 85    | 105          |
| S10    | 1    | 6        | Ol      | 42.05 |      |       | 8.34  |      | 49.17 |       |      |     |      |       |   |      |      |       | 0.44 |      | 100   | 129          |
| S10    | 1    | 7        | Amph    | 50.04 | 1.48 | 11.08 | 12.55 | 0.26 | 8.84  | 9.50  | 3.25 |     |      |       |   |      |      |       |      |      | 97    | 126          |
| S10    | 1    | 8        | Chl     | 27.33 |      | 20.39 | 22.08 |      | 15.20 |       |      |     |      |       |   |      |      |       |      |      | 85    | 108          |
| S10    | 1    | 9        | Cpx     | 55.14 |      | 2.32  | 2.06  |      | 17.90 | 22.10 |      |     |      |       |   |      |      | 0.48  |      |      | 100   | 122          |
| S10    | 1    | 10       | Grt     | 39.42 |      | 20.77 | 29.46 | 1.71 | 1.39  | 7.26  |      |     |      |       |   |      |      |       |      |      | 100   | 125          |
| S10    | 1    | 11       | Ol      | 41.35 |      |       | 9.01  |      | 49.21 |       |      |     |      |       |   |      |      |       | 0.43 |      | 100   | 119          |

Table B5.1: EDS analyses from sample 10.

[illegible]

Table B5.2: EDS analyses from sample 10.

| Sample | Site | Position | Mineral | SiO2   | TiO2  | Al2O3 | FeO   | MnO  | MgO   | CaO   | Na2O | K2O   | P2O5 | SO3   | F | Cl | V2O5 | Cr2O3 | CoO  | NiO | ZnO | SrO | ZrO2 | BaO | Yb2O3 | HfO2 | WO3 | Total | Actual Total |
|--------|------|----------|---------|--------|-------|-------|-------|------|-------|-------|------|-------|------|-------|---|----|------|-------|------|-----|-----|-----|------|-----|-------|------|-----|-------|--------------|
| S10    | 4    | 1        | Ms      | 49.33  | 0.57  | 25.68 | 6.14  |      | 2.35  |       |      | 10.93 |      |       |   |    |      |       |      |     |     |     |      |     |       |      |     | 95    | 117          |
| S10    | 4    | 2        | Dol     |        |       |       | 0.28  |      | 22.74 | 30.98 |      |       |      |       |   |    |      |       |      |     |     |     |      |     |       |      |     | 54    | 109          |
| S10    | 4    | 3        | Spl     |        |       | 50.92 | 12.40 |      | 18.89 |       |      |       |      |       |   |    |      | 17.43 | 0.36 |     |     |     |      |     |       |      |     | 100   | 117          |
| S10    | 4    | 4        | Cpx     | 53.42  |       | 4.37  | 2.68  |      | 16.69 | 21.29 | 0.51 |       |      |       |   |    |      | 1.04  |      |     |     |     |      |     |       |      |     | 100   | 117          |
| S10    | 4    | 5        | Ol      | 42.18  |       |       | 7.52  |      | 49.91 |       |      |       |      |       |   |    |      |       | 0.39 |     |     |     |      |     |       |      |     | 100   | 106          |
| S10    | 4    | 6        | Ol      | 42.14  |       |       | 7.44  |      | 50.13 |       |      |       |      |       |   |    |      |       | 0.29 |     |     |     |      |     |       |      |     | 100   | 116          |
| S10    | 4    | 7        | Ol      | 41.99  |       |       | 8.48  |      | 49.20 |       |      |       |      |       |   |    |      |       | 0.33 |     |     |     |      |     |       |      |     | 100   | 126          |
| S10    | 4    | 8        | Ep      | 40.59  |       | 27.85 | 5.50  |      |       | 23.06 |      |       |      |       |   |    |      |       |      |     |     |     |      |     |       |      |     | 97    | 122          |
| S10    | 4    | 9        | Dol     |        |       |       |       |      | 22.49 | 31.51 |      |       |      |       |   |    |      |       |      |     |     |     |      |     |       |      |     | 54    | 98           |
| S10    | 4    | 10       | Dol     |        |       |       |       |      | 22.44 | 31.56 |      |       |      |       |   |    |      |       |      |     |     |     |      |     |       |      |     | 54    | 118          |
| S10    | 4    | 11       | Ol      | 44.84  |       |       | 10.82 |      | 44.03 |       |      |       |      |       |   |    |      |       | 0.31 |     |     |     |      |     |       |      |     | 100   | 112          |
| S10    | 4    | 12       | Chr     |        |       | 27.75 | 14.79 |      | 15.04 |       |      |       |      |       |   |    |      | 42.43 |      |     |     |     |      |     |       |      |     | 100   | 113          |
| S10    | 4    | 13       | Chl     | 26.82  |       | 19.90 | 22.47 |      | 15.81 |       |      |       |      |       |   |    |      |       |      |     |     |     |      |     |       |      |     | 85    | 98           |
| S10    | 4    | 14       | Opx     | 54.87  | 0.40  | 0.85  | 18.30 | 0.56 | 23.32 | 1.70  |      |       |      |       |   |    |      |       |      |     |     |     |      |     |       |      |     | 100   | 98           |
| S10    | 4    | 15       | Feohy + | 1.19   |       |       | 95.78 | 1.48 | 1.55  |       |      |       |      |       |   |    |      |       |      |     |     |     |      |     |       |      |     | 100   | 117          |
| S10    | 4    | 16       | Ol      | 41.64  |       |       | 8.47  |      | 49.47 |       |      |       |      |       |   |    |      |       | 0.42 |     |     |     |      |     |       |      |     | 100   | 117          |
| S10    | 4    | 17       | Chr     |        |       | 20.28 | 18.60 |      | 12.60 |       |      |       |      |       |   |    |      | 48.52 |      |     |     |     |      |     |       |      |     | 100   | 107          |
| S10    | 4.1  | 1        | Py      |        |       |       | 29.09 |      |       |       |      |       |      | 70.91 |   |    |      |       |      |     |     |     |      |     |       |      |     | 100   | 107          |
| S10    | 4.1  | 2        | Ads     | 60.43  |       | 24.25 | 0.97  |      |       | 6.98  | 7.37 |       |      |       |   |    |      |       |      |     |     |     |      |     |       |      |     | 100   | 113          |
| S10    | 4.1  | 3        | Amph    | 50.05  | 1.22  | 2.09  | 16.60 | 0.38 | 11.88 | 14.47 | 0.31 |       |      |       |   |    |      |       |      |     |     |     |      |     |       |      |     | 97    | 104          |
| S10    | 5    | 1        | TiO2    |        | 99.63 |       | 0.37  |      |       |       |      |       |      |       |   |    |      |       |      |     |     |     |      |     |       |      |     | 100   | 99           |
| S10    | 5    | 2        | Chr     |        |       | 18.83 | 24.07 |      | 10.44 |       |      |       |      |       |   |    |      | 46.66 |      |     |     |     |      |     |       |      |     | 100   | 117          |
| S10    | 5    | 3        | Qz      | 100.00 |       |       |       |      |       |       |      |       |      |       |   |    |      |       |      |     |     |     |      |     |       |      |     | 100   | 115          |
| S10    | 5    | 4        | Opx     | 56.77  |       | 3.40  | 5.47  |      | 33.37 | 0.39  |      |       |      |       |   |    |      | 0.60  |      |     |     |     |      |     |       |      |     | 100   | 121          |
| S10    | 5    | 5        | Amph    | 44.97  | 2.14  | 12.83 | 8.31  | 0.22 | 15.01 | 11.19 | 2.31 |       |      |       |   |    |      |       |      |     |     |     |      |     |       |      |     | 97    | 99           |
| S10    | 5    | 6        | Ol      | 42.25  |       |       | 7.85  | 0.21 | 49.33 |       |      |       |      |       |   |    |      |       | 0.36 |     |     |     |      |     |       |      |     | 100   | 119          |
| S10    | 5    | 7        | Ol      | 41.98  |       |       | 8.51  |      | 49.12 |       |      |       |      |       |   |    |      |       | 0.39 |     |     |     |      |     |       |      |     | 100   | 114          |
| S10    | 5    | 8        | Ol      | 41.92  |       |       | 8.84  |      | 48.85 |       |      |       |      |       |   |    |      |       | 0.39 |     |     |     |      |     |       |      |     | 100   | 115          |
| S10    | 5    | 9        | Ol      | 41.64  |       |       | 8.73  |      | 49.21 |       |      |       |      |       |   |    |      |       | 0.42 |     |     |     |      |     |       |      |     | 100   | 101          |
| S10    | 5    | 10       | Chl     | 24.78  |       | 21.53 | 28.37 | 0.26 | 10.06 |       |      |       |      |       |   |    |      |       |      |     |     |     |      |     |       |      |     | 85    | 101          |
| S10    | 5    | 11       | Amph    | 44.63  | 3.23  | 8.43  | 15.29 | 0.31 | 11.30 | 13.06 | 0.59 | 0.16  |      |       |   |    |      |       |      |     |     |     |      |     |       |      |     | 97    | 119          |
| S10    | 5    | 12       | Spl     |        |       | 36.30 | 17.49 |      | 15.03 |       |      |       |      |       |   |    | 0.33 | 30.85 |      |     |     |     |      |     |       |      |     | 100   | 113          |
| S10    | 5    | 13       | Wo      | 53.84  |       |       |       |      |       | 46.16 |      |       |      |       |   |    |      |       |      |     |     |     |      |     |       |      |     | 100   | 100          |
| S10    | 5    | 14       | Ol      | 41.02  |       |       | 8.06  |      | 49.09 |       |      |       |      |       |   |    |      |       | 0.41 |     |     |     |      |     |       | 1.42 |     | 100   | 109          |
| S10    | 5    | 15       | Opx     | 53.92  | 0.29  | 0.70  | 21.13 | 0.90 | 21.45 | 1.60  |      |       |      |       |   |    |      |       |      |     |     |     |      |     |       |      |     | 100   | 117          |
| S10    | 5    | 16       | Ol      | 41.72  |       |       | 7.51  | 0.22 | 50.23 |       |      |       |      |       |   |    |      |       | 0.33 |     |     |     |      |     |       |      |     | 100   | 119          |
| S10    | 5    | 17       | Grt     | 39.80  |       | 20.89 | 27.15 | 1.44 | 2.21  | 8.51  |      |       |      |       |   |    |      |       |      |     |     |     |      |     |       |      |     | 100   | 114          |
| S10    | 5.1  | 1        | Cpx     | 53.28  |       | 5.61  | 2.10  |      | 15.98 | 21.34 | 0.72 |       |      |       |   |    |      | 0.98  |      |     |     |     |      |     |       |      |     | 100   | 100          |
| S10    | 5.1  | 2        | Ol      | 41.91  |       |       | 8.80  |      | 48.91 |       |      |       |      |       |   |    |      |       | 0.38 |     |     |     |      |     |       |      |     | 100   | 104          |
| S10    | 5.1  | 3        | Olig +  | 58.78  |       | 23.33 | 2.56  |      | 1.39  | 6.93  | 7.01 |       |      |       |   |    |      |       |      |     |     |     |      |     |       |      |     | 100   | 102          |
| S10    | 5.1  | 4        | Cpx     | 50.23  | 2.03  | 5.69  | 9.09  |      | 14.65 | 17.96 | 0.35 |       |      |       |   |    |      |       |      |     |     |     |      |     |       |      |     | 100   | 119          |
| S10    | 6    | 1        | Opx     | 55.80  |       | 3.97  | 5.45  |      | 32.82 | 1.27  |      |       |      |       |   |    |      | 0.68  |      |     |     |     |      |     |       |      |     | 100   | 115          |
| S10    | 6    | 2        | Grt     | 40.11  |       | 21.13 | 28.46 | 1.91 | 3.48  | 4.91  |      |       |      |       |   |    |      |       |      |     |     |     |      |     |       |      |     | 100   | 101          |
| S10    | 6    | 3        | Chr     |        |       | 17.39 | 17.03 |      | 12.72 |       |      |       |      |       |   |    |      | 52.86 |      |     |     |     |      |     |       |      |     | 100   | 120          |



Table B5.2: EDS analyses from sample 10.

| Sample | Site | Position | Mineral        | SiO2   | TiO2  | Al2O3 | FeO   | MnO  | MgO   | CaO   | Na2O  | K2O  | P2O5 | SO3   | F     | Cl   | V2O5 | Cr2O3 | CoO | NiO  | ZnO  | SrO | ZrO2 | BaO | Yb2O3 | HfO2 | WO3 | Total | Actual Total |
|--------|------|----------|----------------|--------|-------|-------|-------|------|-------|-------|-------|------|------|-------|-------|------|------|-------|-----|------|------|-----|------|-----|-------|------|-----|-------|--------------|
| S10    | 6    | 4        | Opx            | 56.27  |       | 3.28  | 5.82  |      | 32.77 | 1.13  |       |      |      |       |       |      |      | 0.74  |     |      |      |     |      |     |       |      |     | 100   | 113          |
| S10    | 6    | 5        | Ol             | 41.15  |       |       | 10.52 |      | 47.93 |       |       |      |      |       |       |      |      |       |     | 0.40 |      |     |      |     |       |      |     | 100   | 114          |
| S10    | 6    | 6        | Ol             | 42.16  |       |       | 7.40  |      | 50.15 |       |       |      |      |       |       |      |      |       |     | 0.29 |      |     |      |     |       |      |     | 100   | 115          |
| S10    | 6    | 7        | TiO2 +         | 6.77   | 84.89 | 1.86  | 2.49  |      | 4.00  |       |       |      |      |       |       |      |      |       |     |      |      |     |      |     |       |      |     | 100   | 99           |
| S10    | 6    | 8        | Ol             | 42.10  |       |       | 8.13  |      | 49.37 |       |       |      |      |       |       |      |      |       |     | 0.40 |      |     |      |     |       |      |     | 100   | 108          |
| S10    | 6    | 9        | Chr            |        |       | 22.76 | 15.72 |      | 14.57 |       |       |      |      |       |       |      |      | 46.96 |     |      |      |     |      |     |       |      |     | 100   | 119          |
| S10    | 6    | 10       | Grt            | 40.29  |       | 21.06 | 26.42 | 0.62 | 4.14  | 7.47  |       |      |      |       |       |      |      |       |     |      |      |     |      |     |       |      |     | 100   | 107          |
| S10    | 6    | 11       | Ol             | 41.92  |       |       | 9.16  |      | 48.54 |       |       |      |      |       |       |      |      |       |     | 0.38 |      |     |      |     |       |      |     | 100   | 121          |
| S10    | 6    | 12       | Ol             | 41.84  |       |       | 8.13  |      | 49.67 |       |       |      |      |       |       |      |      |       |     | 0.36 |      |     |      |     |       |      |     | 100   | 112          |
| S10    | 6    | 13       | Ol             | 42.23  |       |       | 7.56  |      | 49.87 |       |       |      |      |       |       |      |      |       |     | 0.35 |      |     |      |     |       |      |     | 100   | 102          |
| S10    | 6    | 14       | Ol             | 42.17  |       |       | 8.24  |      | 49.59 |       |       |      |      |       |       |      |      |       |     |      |      |     |      |     |       |      |     | 100   | 116          |
| S10    | 6    | 15       | Cpx            | 53.19  | 1.03  | 1.61  | 9.78  | 0.38 | 12.72 | 20.54 | 0.74  |      |      |       |       |      |      |       |     |      |      |     |      |     |       |      |     | 100   | 112          |
| S10    | 6    | 16       | Ol             | 42.14  |       |       | 7.82  |      | 50.04 |       |       |      |      |       |       |      |      |       |     |      |      |     |      |     |       |      |     | 100   | 117          |
| S10    | 6    | 17       | Ol             | 41.97  |       |       | 8.37  |      | 49.34 |       |       |      |      |       |       |      |      |       |     | 0.32 |      |     |      |     |       |      |     | 100   | 117          |
| S10    | 6    | 18       | Ol             | 42.11  |       |       | 7.25  |      | 50.30 |       |       |      |      |       |       |      |      |       |     | 0.34 |      |     |      |     |       |      |     | 100   | 119          |
| S10    | 6.1  | 1        | Feohy + TiO2 + | 17.90  | 21.83 | 1.73  | 43.00 |      |       | 14.74 |       |      |      |       |       |      | 0.79 |       |     |      |      |     |      |     |       |      |     | 100   | 113          |
| S10    | 6.1  | 2        | Olig +         | 60.74  |       | 24.79 | 1.53  |      | 0.60  | 3.06  | 6.60  | 2.68 |      |       |       |      |      |       |     |      |      |     |      |     |       |      |     | 100   | 120          |
| S10    | 6.1  | 3        | Cpx +          | 48.80  | 6.80  | 2.52  | 12.35 | 0.27 | 10.40 | 18.36 | 0.51  |      |      |       |       |      |      |       |     |      |      |     |      |     |       |      |     | 100   | 57           |
| S10    | 6.1  | 4        | Olig           | 62.06  |       | 24.21 | 0.74  |      |       | 3.88  | 7.77  | 1.34 |      |       |       |      |      |       |     |      |      |     |      |     |       |      |     | 100   | 107          |
| S10    | 6.1  | 5        | Opx            | 51.51  |       | 7.46  | 15.60 |      | 23.18 | 1.19  | 0.60  | 0.25 |      |       |       | 0.22 |      |       |     |      |      |     |      |     |       |      |     | 100   | 118          |
| S10    | 6.1  | 6        | Ab             | 67.88  |       | 20.02 | 0.23  |      |       | 1.33  | 10.54 |      |      |       |       |      |      |       |     |      |      |     |      |     |       |      |     | 100   | 223          |
| S10    | 6.1  | 7        | Ttn            | 34.92  | 26.87 | 5.72  | 4.77  |      | 1.87  | 25.08 |       |      |      |       |       |      | 0.76 |       |     |      |      |     |      |     |       |      |     | 100   | 113          |
| S10    | 6.1  | 8        | Feohy +        | 10.10  | 2.61  | 4.07  | 77.43 | 0.80 | 3.81  | 0.65  | 0.52  |      |      |       |       |      |      |       |     |      |      |     |      |     |       |      |     | 100   | 118          |
| S10    | 6.1  | 9        | Ab             | 68.99  |       | 18.77 | 0.24  |      |       | 0.56  | 11.44 |      |      |       |       |      |      |       |     |      |      |     |      |     |       |      |     | 100   | 105          |
| S10    | 6.1  | 10       | Cpx            | 50.86  | 1.61  | 4.09  | 10.64 | 0.27 | 14.34 | 17.82 | 0.37  |      |      |       |       |      |      |       |     |      |      |     |      |     |       |      |     | 100   | 57           |
| S10    | 6.1  | 11       | Mag            | 1.91   |       |       | 95.00 |      | 3.09  |       |       |      |      |       |       |      |      |       |     |      |      |     |      |     |       |      |     | 100   | 99           |
| S10    | 6.1  | 12       | Ol             | 48.38  |       |       | 6.16  |      | 43.33 |       |       |      |      |       |       |      |      |       |     |      |      |     |      |     |       | 2.13 |     | 100   | 106          |
| S10    | 7    | 1        | Chr            |        |       | 12.29 | 18.91 |      | 10.56 |       |       |      |      |       |       |      | 0.42 | 57.82 |     |      |      |     |      |     |       |      |     | 100   | 116          |
| S10    | 7    | 2        | Chl            | 26.36  |       | 20.57 | 25.83 | 0.39 | 11.64 |       |       |      |      |       |       |      |      | 0.22  |     |      |      |     |      |     |       |      |     | 85    | 109          |
| S10    | 7    | 3        | Dol            |        |       |       | 6.37  | 0.51 | 18.08 | 29.04 |       |      |      |       |       |      |      |       |     |      |      |     |      |     |       |      |     | 54    | 98           |
| S10    | 7    | 4        | Ol             | 41.85  |       |       | 8.43  |      | 49.29 |       |       |      |      |       |       |      |      |       |     | 0.43 |      |     |      |     |       |      |     | 100   | 93           |
| S10    | 7    | 5        | Qz             | 100.00 |       |       |       |      |       |       |       |      |      |       |       |      |      |       |     |      |      |     |      |     |       |      |     | 100   | 114          |
| S10    | 7    | 6        | Spl            |        |       | 37.92 | 16.31 |      | 16.45 |       |       |      |      |       |       |      |      | 28.91 |     |      | 0.41 |     |      |     |       |      |     | 100   | 106          |
| S10    | 7    | 7        | Amph           | 45.25  | 2.70  | 8.20  | 16.57 | 0.33 | 10.81 | 11.96 | 0.87  | 0.32 |      |       |       |      |      |       |     |      |      |     |      |     |       |      |     | 97    | 111          |
| S10    | 7    | 8        | Chl            | 27.20  |       | 20.59 | 19.69 | 0.22 | 17.31 |       |       |      |      |       |       |      |      |       |     |      |      |     |      |     |       |      |     | 85    | 99           |
| S10    | 7    | 9        | Fl             |        |       |       |       |      | 0.81  | 59.31 |       |      |      | 0.68  | 39.19 |      |      |       |     |      |      |     |      |     |       |      |     | 100   | 114          |
| S10    | 7    | 10       | Grt            | 40.36  |       | 21.12 | 26.03 | 2.09 | 5.07  | 5.33  |       |      |      |       |       |      |      |       |     |      |      |     |      |     |       |      |     | 100   | 107          |
| S10    | 7    | 11       | Opx            | 56.21  |       | 3.52  | 5.69  |      | 32.50 | 1.37  |       |      |      |       |       |      |      | 0.71  |     |      |      |     |      |     |       |      |     | 100   | 113          |
| S10    | 7    | 12       | Ol             | 41.90  |       |       | 8.48  |      | 49.23 |       |       |      |      |       |       |      |      |       |     | 0.38 |      |     |      |     |       |      |     | 100   | 111          |
| S10    | 7    | 13       | Grt            | 34.81  | 1.15  | 22.60 | 1.46  |      |       | 39.97 |       |      |      |       |       |      |      |       |     |      |      |     |      |     |       |      |     | 100   | 109          |
| S10    | 7.1  | 1        | Qz             | 94.28  |       |       | 0.38  |      |       | 5.34  |       |      |      |       |       |      |      |       |     |      |      |     |      |     |       |      |     | 100   | 86           |
| S10    | 7.1  | 2        | Py             | 0.40   |       |       | 29.02 |      |       |       | 0.25  |      |      | 70.32 |       |      |      |       |     |      |      |     |      |     |       |      |     | 100   | 114          |
| S10    | 7.1  | 3        | Fl             |        |       |       |       |      |       | 59.27 |       |      |      |       | 40.73 |      |      |       |     |      |      |     |      |     |       |      |     | 100   | 57           |
| S10    | 8    | 1        | Spl            |        |       | 44.57 | 14.25 |      | 17.89 |       |       |      |      |       |       |      |      | 23.29 |     |      |      |     |      |     |       |      |     | 100   | 106          |

Table B5.2: EDS analyses from sample 10.

| Sample | Site | Position | Mineral | SiO2  | TiO2 | Al2O3 | FeO   | MnO  | MgO   | CaO   | Na2O  | K2O | P2O5 | SO3   | F | Cl | V2O5 | Cr2O3 | CoO | NiO  | ZnO  | SrO | ZrO2 | BaO | Yb2O3 | HfO2 | WO3 | Total | Actual Total |
|--------|------|----------|---------|-------|------|-------|-------|------|-------|-------|-------|-----|------|-------|---|----|------|-------|-----|------|------|-----|------|-----|-------|------|-----|-------|--------------|
| S10    | 8    | 2        | Ol      | 41.95 |      |       | 7.60  |      | 50.10 |       |       |     |      |       |   |    |      |       |     | 0.35 |      |     |      |     |       |      |     | 100   | 119          |
| S10    | 8    | 3        | Ol      | 41.98 |      |       | 7.65  |      | 50.06 |       |       |     |      |       |   |    |      |       |     | 0.31 |      |     |      |     |       |      |     | 100   | 112          |
| S10    | 8    | 4        | Ol      | 41.79 |      |       | 8.96  |      | 48.94 |       |       |     |      |       |   |    |      |       |     | 0.31 |      |     |      |     |       |      |     | 100   | 118          |
| S10    | 8    | 5        | Feohy + | 1.35  | 0.42 | 0.98  | 64.35 | 1.25 | 1.56  |       |       |     |      |       |   |    |      | 30.07 |     |      |      |     |      |     |       |      |     | 100   | 119          |
| S10    | 8    | 6        | Opx     | 57.52 |      | 1.66  | 6.53  |      | 34.05 | 0.24  |       |     |      |       |   |    |      |       |     |      |      |     |      |     |       |      |     | 100   | 112          |
| S10    | 8    | 7        | Opx     | 56.34 |      | 3.75  | 5.39  |      | 33.30 | 0.41  |       |     |      |       |   |    |      | 0.81  |     |      |      |     |      |     |       |      |     | 100   | 114          |
| S10    | 8    | 8        | Py      | 0.13  |      |       | 28.27 | 0.28 |       |       |       |     |      | 71.32 |   |    |      |       |     |      |      |     |      |     |       |      |     | 100   | 120          |
| S10    | 8    | 9        | Ol      | 41.80 |      |       | 8.45  |      | 49.33 |       |       |     |      |       |   |    |      |       |     | 0.42 |      |     |      |     |       |      |     | 100   | 100          |
| S10    | 8    | 10       | Ol      | 42.11 |      |       | 7.86  |      | 49.60 |       |       |     |      |       |   |    |      |       |     | 0.43 |      |     |      |     |       |      |     | 100   | 106          |
| S10    | 8    | 11       | Chr     |       |      | 23.15 | 17.39 |      | 13.79 |       |       |     |      |       |   |    | 0.41 | 45.27 |     |      |      |     |      |     |       |      |     | 100   | 121          |
| S10    | 8    | 12       | Chr     |       |      | 21.42 | 16.25 |      | 14.23 |       |       |     |      |       |   |    |      | 48.10 |     |      |      |     |      |     |       |      |     | 100   | 113          |
| S10    | 8    | 13       | Ol      | 42.18 |      |       | 7.97  |      | 49.50 |       |       |     |      |       |   |    |      |       |     | 0.35 |      |     |      |     |       |      |     | 100   | 56           |
| S10    | 8    | 14       | Ol      | 41.74 |      |       | 8.92  |      | 48.99 |       |       |     |      |       |   |    |      |       |     | 0.35 |      |     |      |     |       |      |     | 100   | 107          |
| S10    | 8    | 15       | Amph    | 46.25 | 2.14 | 10.02 | 13.79 |      | 12.50 | 10.56 | 1.72  |     |      |       |   |    |      |       |     |      |      |     |      |     |       |      |     | 97    | 115          |
| S10    | 8    | 16       | Ol      | 42.43 |      |       | 6.75  |      | 50.46 |       |       |     |      |       |   |    |      |       |     | 0.35 |      |     |      |     |       |      |     | 100   | 118          |
| S10    | 8    | 17       | Ol      | 42.15 |      |       | 7.57  |      | 49.90 |       |       |     |      |       |   |    |      |       |     | 0.39 |      |     |      |     |       |      |     | 100   | 115          |
| S10    | 8.1  | 1        | Ol      | 41.95 |      |       | 8.18  |      | 49.48 |       |       |     |      |       |   |    |      |       |     | 0.39 |      |     |      |     |       |      |     | 100   | 118          |
| S10    | 8.1  | 2        | Opx     | 58.81 |      | 4.24  | 2.57  |      | 33.22 |       | 0.75  |     |      |       |   |    |      | 0.40  |     |      |      |     |      |     |       |      |     | 100   | 120          |
| S10    | 8.1  | 3        | Ab      | 69.29 |      | 18.78 |       |      |       | 0.42  | 11.52 |     |      |       |   |    |      |       |     |      |      |     |      |     |       |      |     | 100   | 92           |
| S10    | 8.1  | 4        | Chl     | 27.27 |      | 17.55 | 27.17 | 0.38 | 11.90 | 0.38  | 0.34  |     |      |       |   |    |      |       |     |      |      |     |      |     |       |      |     | 85    | 118          |
| S10    | 9    | 1        | Chr     |       |      | 23.42 | 18.85 |      | 12.17 |       |       |     |      |       |   |    |      | 45.56 |     |      |      |     |      |     |       |      |     | 100   | 121          |
| S10    | 9    | 2        | Spl     |       |      | 36.81 | 15.98 |      | 16.17 |       |       |     |      |       |   |    | 0.32 | 30.71 |     |      |      |     |      |     |       |      |     | 100   | 115          |
| S10    | 9    | 3        | Chl     | 25.83 |      | 22.01 | 22.47 |      | 14.69 |       |       |     |      |       |   |    |      |       |     |      |      |     |      |     |       |      |     | 85    | 116          |
| S10    | 9    | 4        | Dol     |       |      |       | 0.26  |      | 22.66 | 31.08 |       |     |      |       |   |    |      |       |     |      |      |     |      |     |       |      |     | 54    | 119          |
| S10    | 9    | 5        | Ol      | 41.93 |      |       | 8.10  |      | 49.70 |       |       |     |      |       |   |    |      |       |     | 0.28 |      |     |      |     |       |      |     | 100   | 122          |
| S10    | 9    | 6        | Ol      | 41.63 |      |       | 8.47  |      | 49.42 |       |       |     |      |       |   |    |      |       |     | 0.48 |      |     |      |     |       |      |     | 100   | 94           |
| S10    | 9    | 7        | Ol      | 41.99 |      |       | 8.67  |      | 48.99 |       |       |     |      |       |   |    |      |       |     | 0.35 |      |     |      |     |       |      |     | 100   | 99           |
| S10    | 9    | 8        | Ol      | 42.14 |      |       | 8.22  |      | 49.19 |       |       |     |      |       |   |    |      |       |     | 0.45 |      |     |      |     |       |      |     | 100   | 96           |
| S10    | 9    | 9        | Ol      | 41.92 |      |       | 7.82  |      | 49.84 |       |       |     |      |       |   |    |      |       |     | 0.41 |      |     |      |     |       |      |     | 100   | 115          |
| S10    | 9    | 10       | Opx     | 57.60 |      | 1.86  | 5.69  |      | 34.22 | 0.40  |       |     |      |       |   |    |      | 0.23  |     |      |      |     |      |     |       |      |     | 100   | 117          |
| S10    | 9    | 11       | Chl     | 25.68 |      | 21.50 | 24.07 | 0.24 | 13.51 |       |       |     |      |       |   |    |      |       |     |      |      |     |      |     |       |      |     | 85    | 94           |
| S10    | 9    | 12       | Dol     |       |      |       |       |      | 22.58 | 31.42 |       |     |      |       |   |    |      |       |     |      |      |     |      |     |       |      |     | 54    | 106          |
| S10    | 9    | 13       | Chr     |       |      | 8.79  | 20.84 |      | 9.57  |       |       |     |      |       |   |    |      | 60.79 |     |      |      |     |      |     |       |      |     | 100   | 113          |
| S10    | 9    | 14       | Chl     | 26.86 |      | 19.74 | 23.44 |      | 14.96 |       |       |     |      |       |   |    |      |       |     |      |      |     |      |     |       |      |     | 85    | 124          |
| S10    | 9    | 15       | Ol      | 42.28 |      |       | 7.07  |      | 50.28 |       |       |     |      |       |   |    |      |       |     | 0.38 |      |     |      |     |       |      |     | 100   | 114          |
| S10    | 9    | 16       | Dol     |       |      |       |       |      | 22.55 | 31.45 |       |     |      |       |   |    |      |       |     |      |      |     |      |     |       |      |     | 54    | 114          |
| S10    | 9    | 17       | Mag     | 1.04  |      |       | 97.32 | 0.74 | 0.90  |       |       |     |      |       |   |    |      |       |     |      |      |     |      |     |       |      |     | 100   | 108          |
| S10    | 9    | 18       | Ol      | 42.19 |      |       | 8.38  |      | 49.10 |       |       |     |      |       |   |    |      |       |     | 0.33 |      |     |      |     |       |      |     | 100   | 105          |
| S10    | 10   | 1        | Grt     | 39.31 |      | 20.94 | 30.54 | 0.27 | 1.65  | 7.29  |       |     |      |       |   |    |      |       |     |      |      |     |      |     |       |      |     | 100   | 101          |
| S10    | 10   | 2        | Spl     |       |      | 47.21 | 13.54 |      | 18.01 |       |       |     |      |       |   |    |      | 20.82 |     |      | 0.41 |     |      |     |       |      |     | 100   | 111          |
| S10    | 10   | 3        | Spl     |       |      | 47.59 | 14.35 |      | 18.36 |       |       |     |      |       |   |    |      | 19.41 |     | 0.29 |      |     |      |     |       |      |     | 100   | 98           |
| S10    | 10   | 4        | Ol      | 42.02 |      |       | 7.49  |      | 50.10 |       |       |     |      |       |   |    |      |       |     | 0.40 |      |     |      |     |       |      |     | 100   | 116          |
| S10    | 10   | 5        | Tur     | 37.33 | 0.30 | 32.08 | 12.00 |      | 2.84  | 0.34  | 2.11  |     |      |       |   |    |      |       |     |      |      |     |      |     |       |      |     | 87    | 120          |
| S10    | 10   | 6        | Ol      | 42.05 |      |       | 7.68  |      | 49.82 |       |       |     |      |       |   |    |      |       |     | 0.45 |      |     |      |     |       |      |     | 100   | 119          |

Table B5.2: EDS analyses from sample 10.

| Sample | Site | Position | Mineral | SiO2  | TiO2  | Al2O3 | FeO   | MnO  | MgO   | CaO   | Na2O | K2O  | P2O5 | SO3 | F    | Cl | V2O5 | Cr2O3 | CoO | NiO  | ZnO | SrO | ZrO2 | BaO | Yb2O3 | HfO2 | WO3 | Total | Actual Total |
|--------|------|----------|---------|-------|-------|-------|-------|------|-------|-------|------|------|------|-----|------|----|------|-------|-----|------|-----|-----|------|-----|-------|------|-----|-------|--------------|
| S10    | 10   | 7        | Grt     | 39.60 |       | 20.94 | 31.46 | 0.75 | 3.93  | 3.32  |      |      |      |     |      |    |      |       |     |      |     |     |      |     |       |      |     | 100   | 121          |
| S10    | 10   | 8        | Grt     | 39.69 | 0.32  | 21.05 | 24.72 | 1.04 | 1.96  | 11.21 |      |      |      |     |      |    |      |       |     |      |     |     |      |     |       |      |     | 100   | 116          |
| S10    | 10   | 9        | Ol      | 42.21 |       |       | 8.35  |      | 49.12 |       |      |      |      |     |      |    |      |       |     | 0.32 |     |     |      |     |       |      |     | 100   | 105          |
| S10    | 10   | 10       | Chr     |       |       | 26.51 | 15.68 |      | 14.87 |       |      |      |      |     |      |    |      | 42.94 |     |      |     |     |      |     |       |      |     | 100   | 116          |
| S10    | 10   | 11       | Amph    | 52.46 |       | 4.88  | 12.51 |      | 14.48 | 12.08 | 0.58 |      |      |     |      |    |      |       |     |      |     |     |      |     |       |      |     | 97    | 99           |
| S10    | 10   | 12       | Opx     | 54.20 | 0.28  |       | 22.67 | 0.85 | 20.46 | 1.54  |      |      |      |     |      |    |      |       |     |      |     |     |      |     |       |      |     | 100   | 113          |
| S10    | 10   | 13       | Ol      | 42.02 |       |       | 8.05  |      | 49.46 |       |      |      |      |     |      |    |      |       |     | 0.46 |     |     |      |     |       |      |     | 100   | 112          |
| S10    | 10   | 14       | Dol     |       |       |       | 0.33  |      | 22.65 | 31.02 |      |      |      |     |      |    |      |       |     |      |     |     |      |     |       |      |     | 54    | 118          |
| S10    | 10   | 15       | Dol     |       |       |       |       |      | 22.48 | 31.52 |      |      |      |     |      |    |      |       |     |      |     |     |      |     |       |      |     | 54    | 110          |
| S10    | 10   | 16       | Chr     |       |       | 24.61 | 15.32 |      | 14.80 |       |      |      |      |     |      |    |      | 45.27 |     |      |     |     |      |     |       |      |     | 100   | 116          |
| S10    | 10   | 17       | Cpx     | 53.19 | 0.71  | 3.53  | 7.89  |      | 15.53 | 19.14 |      |      |      |     |      |    |      |       |     |      |     |     |      |     |       |      |     | 100   | 121          |
| S10    | 10   | 18       | Dol     |       |       |       |       |      | 17.52 | 35.55 |      |      |      |     | 0.93 |    |      |       |     |      |     |     |      |     |       |      |     | 54    | 103          |
| S10    | 10   | 19       | Spl     |       |       | 32.15 | 18.24 |      | 14.10 |       |      |      |      |     |      |    |      | 35.51 |     |      |     |     |      |     |       |      |     | 100   | 112          |
| S10    | 10   | 20       | Opx     | 57.55 |       | 2.28  | 5.50  |      | 34.00 | 0.42  |      |      |      |     |      |    |      | 0.25  |     |      |     |     |      |     |       |      |     | 100   | 115          |
| S10    | 11   | 1        | Ol      | 42.08 |       |       | 7.45  |      | 50.20 |       |      |      |      |     |      |    |      |       |     | 0.28 |     |     |      |     |       |      |     | 100   | 95           |
| S10    | 11   | 2        | Dol     |       |       |       |       |      | 22.68 | 31.32 |      |      |      |     |      |    |      |       |     |      |     |     |      |     |       |      |     | 54    | 118          |
| S10    | 11   | 3        | Chr     |       | 0.31  | 22.12 | 36.53 |      | 5.82  |       |      |      |      |     |      |    | 0.40 | 34.82 |     |      |     |     |      |     |       |      |     | 100   | 123          |
| S10    | 11   | 4        | Mix     | 52.39 | 1.06  | 14.15 | 13.48 | 0.25 | 6.85  | 5.96  | 3.93 | 1.92 |      |     |      |    |      |       |     |      |     |     |      |     |       |      |     | 100   | 117          |
| S10    | 11   | 5        | Grt     | 39.75 |       | 21.18 | 29.45 | 0.44 | 4.21  | 4.97  |      |      |      |     |      |    |      |       |     |      |     |     |      |     |       |      |     | 100   | 110          |
| S10    | 11   | 6        | Ol      | 41.79 |       |       | 8.30  |      | 49.53 |       |      |      |      |     |      |    |      |       |     | 0.37 |     |     |      |     |       |      |     | 100   | 55           |
| S10    | 11   | 7        | Cpx     | 52.93 | 1.06  | 1.57  | 12.83 | 0.43 | 12.70 | 18.04 | 0.44 |      |      |     |      |    |      |       |     |      |     |     |      |     |       |      |     | 100   | 110          |
| S10    | 11   | 8        | Amph    | 42.04 | 2.17  | 10.49 | 19.03 | 0.36 | 12.12 | 9.88  | 0.91 |      |      |     |      |    |      |       |     |      |     |     |      |     |       |      |     | 97    | 57           |
| S10    | 11   | 9        | Grt     | 39.28 |       | 20.84 | 30.62 | 3.21 | 1.83  | 4.23  |      |      |      |     |      |    |      |       |     |      |     |     |      |     |       |      |     | 100   | 111          |
| S10    | 11   | 10       | Ol      | 41.39 |       |       | 9.92  |      | 48.30 |       |      |      |      |     |      |    |      |       |     | 0.39 |     |     |      |     |       |      |     | 100   | 118          |
| S10    | 11   | 11       | Opx     | 56.59 |       | 3.31  | 5.60  |      | 33.44 | 0.52  |      |      |      |     |      |    |      | 0.54  |     |      |     |     |      |     |       |      |     | 100   | 120          |
| S10    | 11   | 12       | Opx     | 57.04 |       | 2.64  | 5.72  |      | 33.96 | 0.27  |      |      |      |     |      |    |      | 0.38  |     |      |     |     |      |     |       |      |     | 100   | 118          |
| S10    | 11   | 13       | Tur     | 37.87 | 0.79  | 32.45 | 4.82  |      | 7.77  | 0.96  | 2.35 |      |      |     |      |    |      |       |     |      |     |     |      |     |       |      |     | 87    | 111          |
| S10    | 11   | 14       | Opx     | 56.83 |       | 2.95  | 5.42  |      | 33.91 | 0.32  |      |      |      |     |      |    |      | 0.57  |     |      |     |     |      |     |       |      |     | 100   | 116          |
| S10    | 11   | 15       | Qz +    | 86.50 |       | 7.58  | 2.37  |      | 1.03  |       | 0.31 | 2.21 |      |     |      |    |      |       |     |      |     |     |      |     |       |      |     | 100   | 113          |
| S10    | 11   | 16       | Chr     |       |       | 13.64 | 24.70 |      | 9.88  |       |      |      |      |     |      |    |      | 51.78 |     |      |     |     |      |     |       |      |     | 100   | 120          |
| S10    | 11   | 17       | Ep      | 40.14 |       | 23.20 | 11.25 |      |       | 22.41 |      |      |      |     |      |    |      |       |     |      |     |     |      |     |       |      |     | 97    | 119          |
| S10    | 11   | 18       | Ol      | 41.82 |       |       | 8.25  |      | 49.57 |       |      |      |      |     |      |    |      |       |     | 0.36 |     |     |      |     |       |      |     | 100   | 114          |
| S10    | 11   | 19       | Chr     |       |       | 16.92 | 19.60 |      | 12.55 |       |      |      |      |     |      |    | 0.51 | 50.41 |     |      |     |     |      |     |       |      |     | 100   | 120          |
| S10    | 12   | 1        | Prh     | 45.88 |       | 21.02 | 3.60  |      |       | 25.50 |      |      |      |     |      |    |      |       |     |      |     |     |      |     |       |      |     | 96    | 57           |
| S10    | 12   | 2        | Chr     |       |       | 18.66 | 16.53 |      | 12.86 |       |      |      |      |     |      |    |      | 51.95 |     |      |     |     |      |     |       |      |     | 100   | 112          |
| S10    | 12   | 3        | Dol     |       |       |       |       |      | 22.49 | 31.51 |      |      |      |     |      |    |      |       |     |      |     |     |      |     |       |      |     | 54    | 112          |
| S10    | 12   | 4        | Act     | 57.98 |       | 1.64  | 2.49  |      | 22.20 | 12.40 |      |      |      |     |      |    |      | 0.29  |     |      |     |     |      |     |       |      |     | 97    | 116          |
| S10    | 12   | 5        | Chr     |       |       | 20.03 | 19.83 |      | 11.72 |       |      |      |      |     |      |    |      | 48.42 |     |      |     |     |      |     |       |      |     | 100   | 109          |
| S10    | 12   | 6        | Ol      | 42.39 |       |       | 7.60  |      | 49.75 |       |      |      |      |     |      |    |      |       |     | 0.27 |     |     |      |     |       |      |     | 100   | 115          |
| S10    | 12   | 7        | Ol      | 42.15 |       |       | 8.04  |      | 49.81 |       |      |      |      |     |      |    |      |       |     |      |     |     |      |     |       |      |     | 100   | 111          |
| S10    | 12   | 8        | Ttn     | 32.54 | 35.61 | 2.07  | 0.67  |      |       | 27.74 |      |      |      |     | 1.38 |    |      |       |     |      |     |     |      |     |       |      |     | 100   | 113          |
| S10    | 12   | 9        | Ol      | 42.28 |       |       | 8.52  |      | 48.75 |       |      |      |      |     |      |    |      |       |     | 0.45 |     |     |      |     |       |      |     | 100   | 111          |
| S10    | 12   | 10       | Amph    | 45.24 | 2.40  | 14.33 | 9.79  |      | 11.41 | 11.96 | 0.60 | 1.28 |      |     |      |    |      |       |     |      |     |     |      |     |       |      |     | 97    | 118          |
| S10    | 12   | 11       | Spl     |       |       | 32.57 | 19.62 |      | 14.75 |       |      |      |      |     |      |    | 0.37 | 32.70 |     |      |     |     |      |     |       |      |     | 100   | 94           |

Table B5.2: EDS analyses from sample 10.

| Sample | Site | Position | Mineral | SiO2  | TiO2  | Al2O3 | FeO   | MnO   | MgO   | CaO   | Na2O | K2O  | P2O5 | SO3 | F     | Cl   | V2O5 | Cr2O3 | CoO | NiO  | ZnO  | SrO | ZrO2 | BaO | Yb2O3 | HfO2 | WO3 | Total | Actual Total |
|--------|------|----------|---------|-------|-------|-------|-------|-------|-------|-------|------|------|------|-----|-------|------|------|-------|-----|------|------|-----|------|-----|-------|------|-----|-------|--------------|
| S10    | 12   | 12       | Ol      | 42.15 |       |       | 8.21  |       | 49.24 |       |      |      |      |     |       |      |      |       |     | 0.40 |      |     |      |     |       |      |     | 100   | 119          |
| S10    | 12   | 13       | Cpx     | 53.44 | 0.60  | 1.75  | 9.62  | 0.34  | 14.47 | 19.40 | 0.38 |      |      |     |       |      |      |       |     |      |      |     |      |     |       |      |     | 100   | 116          |
| S10    | 12   | 14       | Ol      | 41.93 |       |       | 8.42  |       | 49.27 |       |      |      |      |     |       |      |      |       |     | 0.38 |      |     |      |     |       |      |     | 100   | 119          |
| S10    | 12   | 15       | Fl      | 1.42  |       |       | 0.62  | 0.31  | 1.28  | 56.34 |      |      |      |     | 40.02 |      |      |       |     |      |      |     |      |     |       |      |     | 100   | 118          |
| S10    | 12   | 16       | Chl     | 26.83 |       | 20.06 | 22.92 | 0.46  | 14.73 |       |      |      |      |     |       |      |      |       |     |      |      |     |      |     |       |      |     | 85    | 118          |
| S10    | 12   | 17       | Spl     |       |       | 42.45 | 16.11 |       | 16.75 |       |      |      |      |     |       |      |      | 24.70 |     |      |      |     |      |     |       |      |     | 100   | 111          |
| S10    | 12   | 18       | Cpx     | 55.11 |       | 1.91  | 1.83  |       | 17.72 | 22.84 |      |      |      |     |       |      |      | 0.59  |     |      |      |     |      |     |       |      |     | 100   | 115          |
| S10    | 12.1 | 1        | Ttn +   | 35.44 | 25.99 | 5.76  | 6.22  |       | 1.46  | 24.07 |      |      |      |     |       |      | 1.06 |       |     |      |      |     |      |     |       |      |     | 100   | 117          |
| S10    | 12.1 | 2        | Olig    | 61.27 | 0.29  | 23.61 | 1.36  |       |       | 5.03  | 7.72 | 0.72 |      |     |       |      |      |       |     |      |      |     |      |     |       |      |     | 100   | 108          |
| S10    | 12.1 | 3        | Grt     | 39.35 | 1.67  | 10.52 | 13.90 |       |       | 34.56 |      |      |      |     |       |      |      |       |     |      |      |     |      |     |       |      |     | 100   | 124          |
| S10    | 12.1 | 4        | Chl +   | 41.47 |       | 14.17 | 22.73 |       | 18.75 | 2.34  | 0.54 |      |      |     |       |      |      |       |     |      |      |     |      |     |       |      |     | 100   | 120          |
| S10    | 12.1 | 5        | Ilm +   | 2.47  | 50.41 | 0.63  | 33.84 | 11.03 | 1.63  |       |      |      |      |     |       |      |      |       |     |      |      |     |      |     |       |      |     | 100   | 107          |
| S10    | 12.1 | 6        | Clay    | 52.07 | 0.29  | 7.92  | 10.63 |       | 23.76 | 2.57  | 0.57 | 0.26 | 0.84 |     |       | 1.09 |      |       |     |      |      |     |      |     |       |      |     | 100   | 109          |
| S10    | 13   | 1        | Ol      | 42.23 |       |       | 7.39  |       | 50.01 |       |      |      |      |     |       |      |      |       |     | 0.37 |      |     |      |     |       |      |     | 100   | 117          |
| S10    | 13   | 2        | Mag     | 0.72  |       |       | 99.28 |       |       |       |      |      |      |     |       |      |      |       |     |      |      |     |      |     |       |      |     | 100   | 112          |
| S10    | 13   | 3        | Chl     | 25.17 |       | 21.76 | 26.61 |       | 11.46 |       |      |      |      |     |       |      |      |       |     |      |      |     |      |     |       |      |     | 85    | 120          |
| S10    | 13   | 4        | Ol      | 41.99 |       |       | 8.07  |       | 49.56 |       |      |      |      |     |       |      |      |       |     | 0.38 |      |     |      |     |       |      |     | 100   | 123          |
| S10    | 13   | 5        | Grt     | 36.66 | 8.28  | 19.52 | 25.56 | 1.31  | 3.79  | 4.88  |      |      |      |     |       |      |      |       |     |      |      |     |      |     |       |      |     | 100   | 116          |
| S10    | 13   | 6        | Chr     |       |       | 10.11 | 23.15 |       | 7.94  |       |      |      |      |     |       |      | 0.39 | 57.86 |     |      | 0.55 |     |      |     |       |      |     | 100   | 122          |
| S10    | 13   | 7        | Chr     |       |       | 14.18 | 26.80 |       | 8.52  |       |      |      |      |     |       |      |      | 50.49 |     |      |      |     |      |     |       |      |     | 100   | 122          |
| S10    | 13   | 8        | Spl     |       |       | 30.31 | 17.58 |       | 14.68 |       |      |      |      |     |       |      |      | 37.44 |     |      |      |     |      |     |       |      |     | 100   | 120          |
| S10    | 13   | 9        | Ol      | 42.07 |       |       | 8.10  |       | 49.42 |       |      |      |      |     |       |      |      |       |     | 0.40 |      |     |      |     |       |      |     | 100   | 109          |
| S10    | 13   | 10       | Ol      | 42.08 |       |       | 7.52  |       | 50.07 |       |      |      |      |     |       |      |      |       |     | 0.34 |      |     |      |     |       |      |     | 100   | 98           |
| S10    | 13   | 11       | Spl     |       |       | 31.17 | 15.03 |       | 16.23 |       |      |      |      |     |       |      |      | 37.56 |     |      |      |     |      |     |       |      |     | 100   | 114          |
| S10    | 13   | 12       | Cpx     | 52.59 | 0.52  | 4.60  | 4.47  |       | 16.21 | 20.75 |      |      |      |     |       |      |      | 0.87  |     |      |      |     |      |     |       |      |     | 100   | 120          |
| S10    | 13   | 13       | Cpx     | 55.62 |       | 1.30  | 1.72  |       | 17.96 | 23.12 |      |      |      |     |       |      |      | 0.27  |     |      |      |     |      |     |       |      |     | 100   | 107          |
| S10    | 13   | 14       | Grt     | 39.32 |       | 20.75 | 32.82 | 0.95  | 2.03  | 4.13  |      |      |      |     |       |      |      |       |     |      |      |     |      |     |       |      |     | 100   | 83           |
| S10    | 13   | 15       | Ep      | 40.12 |       | 23.72 | 10.50 |       | 22.67 |       |      |      |      |     |       |      |      |       |     |      |      |     |      |     |       |      |     | 97    | 119          |
| S10    | 13   | 16       | Chl     | 26.43 |       | 21.30 | 22.10 |       | 15.17 |       |      |      |      |     |       |      |      |       |     |      |      |     |      |     |       |      |     | 85    | 109          |
| S10    | 13   | 17       | ?       | 47.65 |       | 21.51 | 4.69  |       | 26.15 |       |      |      |      |     |       |      |      |       |     |      |      |     |      |     |       |      |     | 100   | 113          |
| S10    | 13   | 18       | Grt     | 39.20 |       | 20.88 | 31.19 | 3.99  | 3.09  | 1.65  |      |      |      |     |       |      |      |       |     |      |      |     |      |     |       |      |     | 100   | 120          |
| S10    | 13   | 19       | Amph    | 52.19 | 3.16  | 10.34 | 10.72 |       | 6.77  | 10.19 | 3.63 |      |      |     |       |      |      |       |     |      |      |     |      |     |       |      |     | 97    | 114          |
| S10    | 13   | 20       | Ol      | 42.79 |       |       | 8.10  |       | 48.67 |       |      |      |      |     |       |      |      |       |     | 0.44 |      |     |      |     |       |      |     | 100   | 48           |
| S10    | 13   | 21       | Chl     | 25.41 |       | 21.80 | 25.86 |       | 11.93 |       |      |      |      |     |       |      |      |       |     |      |      |     |      |     |       |      |     | 85    | 114          |
| S10    | 13   | 22       | Ol      | 41.85 |       |       | 8.06  |       | 49.72 |       |      |      |      |     |       |      |      |       |     | 0.37 |      |     |      |     |       |      |     | 100   | 116          |
| S10    | 14   | 1        | Opx     | 58.64 |       | 1.17  | 4.90  |       | 35.05 | 0.24  |      |      |      |     |       |      |      |       |     |      |      |     |      |     |       |      |     | 100   | 112          |
| S10    | 14   | 2        | Ol      | 41.97 |       |       | 8.61  |       | 49.12 |       |      |      |      |     |       |      |      |       |     | 0.29 |      |     |      |     |       |      |     | 100   | 119          |
| S10    | 14   | 3        | Grt     | 39.94 |       | 21.31 | 28.47 | 0.61  | 4.35  | 5.32  |      |      |      |     |       |      |      |       |     |      |      |     |      |     |       |      |     | 100   | 117          |
| S10    | 14   | 4        | Chr     |       |       | 19.58 | 18.23 |       | 12.31 |       |      |      |      |     |       |      | 0.41 | 49.47 |     |      |      |     |      |     |       |      |     | 100   | 116          |
| S10    | 14   | 5        | Ep      | 40.60 |       | 26.12 | 7.34  |       | 0.35  | 22.58 |      |      |      |     |       |      |      |       |     |      |      |     |      |     |       |      |     | 97    | 106          |
| S10    | 14   | 6        | Chr     |       |       | 14.45 | 20.66 |       | 10.89 |       |      |      |      |     |       |      |      | 54.00 |     |      |      |     |      |     |       |      |     | 100   | 96           |
| S10    | 14   | 7        | Cpx     | 53.93 | 0.51  | 1.47  | 9.90  | 0.29  | 15.09 | 18.81 |      |      |      |     |       |      |      |       |     |      |      |     |      |     |       |      |     | 100   | 115          |
| S10    | 14   | 8        | Ol      | 41.75 |       |       | 9.19  |       | 48.74 |       |      |      |      |     |       |      |      |       |     | 0.32 |      |     |      |     |       |      |     | 100   | 124          |
| S10    | 14   | 9        | Cpx     | 53.17 | 1.45  | 2.18  | 6.08  | 0.26  | 15.78 | 20.63 | 0.45 |      |      |     |       |      |      |       |     |      |      |     |      |     |       |      |     | 100   | 232          |



Table B5.2: EDS analyses from sample 10.

| Sample | Site | Position | Mineral | SiO2   | TiO2  | Al2O3 | FeO   | MnO  | MgO   | CaO   | Na2O  | K2O  | P2O5 | SO3   | F     | Cl | V2O5 | Cr2O3 | CoO | NiO  | ZnO | SrO | ZrO2 | BaO | Yb2O3 | HfO2 | WO3 | Total | Actual Total |
|--------|------|----------|---------|--------|-------|-------|-------|------|-------|-------|-------|------|------|-------|-------|----|------|-------|-----|------|-----|-----|------|-----|-------|------|-----|-------|--------------|
| S10    | 14   | 10       | Chr     |        |       | 25.58 | 20.11 |      | 12.52 |       |       |      |      |       |       |    |      | 41.79 |     |      |     |     |      |     |       |      |     | 100   | 116          |
| S10    | 14   | 11       | Cpx     | 54.19  |       | 3.33  | 2.86  |      | 19.76 | 19.02 |       |      |      |       |       |    |      | 0.83  |     |      |     |     |      |     |       |      |     | 100   | 110          |
| S10    | 14   | 12       | Ol      | 42.12  |       |       | 8.34  |      | 49.10 |       |       |      |      |       |       |    |      |       |     | 0.43 |     |     |      |     |       |      |     | 100   | 114          |
| S10    | 14   | 13       | Spl     |        |       | 39.24 | 14.87 |      | 16.88 |       |       |      |      |       |       |    |      | 29.02 |     |      |     |     |      |     |       |      |     | 100   | 111          |
| S10    | 14   | 14       | TiO2    |        | 99.56 |       | 0.44  |      |       |       |       |      |      |       |       |    |      |       |     |      |     |     |      |     |       |      |     | 100   | 111          |
| S10    | 14   | 15       | Ol      | 42.13  |       |       | 8.30  |      | 49.27 |       |       |      |      |       |       |    |      |       |     | 0.29 |     |     |      |     |       |      |     | 100   | 99           |
| S10    | 14   | 16       | Ol      | 42.36  |       |       | 6.92  |      | 50.32 |       |       |      |      |       |       |    |      |       |     | 0.40 |     |     |      |     |       |      |     | 100   | 54           |
| S10    | 14   | 17       | Ol      | 41.89  |       |       | 8.56  |      | 49.26 |       |       |      |      |       |       |    |      |       |     | 0.29 |     |     |      |     |       |      |     | 100   | 113          |
| S10    | 14   | 18       | Ol      | 41.82  |       |       | 8.17  |      | 49.61 |       |       |      |      |       |       |    |      |       |     | 0.41 |     |     |      |     |       |      |     | 100   | 222          |
| S10    | 14.1 | 1        | Ab      | 69.13  |       | 19.12 | 0.22  |      |       |       | 11.33 | 0.20 |      |       |       |    |      |       |     |      |     |     |      |     |       |      |     | 100   | 114          |
| S10    | 14.1 | 2        | Cpx     | 50.13  | 2.25  | 3.31  | 14.55 | 0.35 | 11.17 | 18.24 |       |      |      |       |       |    |      |       |     |      |     |     |      |     |       |      |     | 100   | 116          |
| S10    | 14.1 | 3        | Olig    | 65.65  |       | 21.04 | 0.76  |      |       | 2.31  | 9.73  | 0.52 |      |       |       |    |      |       |     |      |     |     |      |     |       |      |     | 100   | 114          |
| S10    | 14.1 | 4        | TiO2 +  | 2.09   | 92.38 | 0.59  | 3.92  |      | 0.65  | 0.36  |       |      |      |       |       |    |      |       |     |      |     |     |      |     |       |      |     | 100   | 117          |
| S10    | 15   | 1        | Opx     | 56.34  |       | 3.64  | 5.67  |      | 32.98 | 0.68  |       |      |      |       |       |    |      | 0.70  |     |      |     |     |      |     |       |      |     | 100   | 102          |
| S10    | 15   | 2        | Chr     |        |       | 10.43 | 26.91 |      | 7.75  |       |       |      |      |       |       |    |      | 54.91 |     |      |     |     |      |     |       |      |     | 100   | 112          |
| S10    | 15   | 3        | Chr     |        | 0.43  | 17.79 | 24.95 |      | 10.35 |       |       |      |      |       |       |    |      | 46.48 |     |      |     |     |      |     |       |      |     | 100   | 121          |
| S10    | 15   | 4        | Chr     |        |       | 29.38 | 21.22 |      | 12.84 |       |       |      |      |       |       |    |      | 36.55 |     |      |     |     |      |     |       |      |     | 100   | 117          |
| S10    | 15   | 5        | Tur     | 38.24  | 0.37  | 32.49 | 6.46  |      | 6.57  | 0.78  | 2.09  |      |      |       |       |    |      |       |     |      |     |     |      |     |       |      |     | 87    | 114          |
| S10    | 15   | 6        | Chl     | 24.99  |       | 21.08 | 29.89 |      | 9.04  |       |       |      |      |       |       |    |      |       |     |      |     |     |      |     |       |      |     | 85    | 119          |
| S10    | 15   | 7        | Fl      | 0.49   |       |       |       |      | 0.98  | 51.20 | 0.34  |      |      |       | 47.00 |    |      |       |     |      |     |     |      |     |       |      |     | 100   | 117          |
| S10    | 15   | 8        | Ol      | 41.99  |       |       | 8.50  |      | 49.13 |       |       |      |      |       |       |    |      |       |     | 0.38 |     |     |      |     |       |      |     | 100   | 117          |
| S10    | 15   | 9        | Ol      | 42.05  |       |       | 7.46  |      | 50.04 |       |       |      |      |       |       |    |      |       |     | 0.45 |     |     |      |     |       |      |     | 100   | 121          |
| S10    | 15   | 10       | Dol     |        |       |       |       |      | 22.52 | 31.48 |       |      |      |       |       |    |      |       |     |      |     |     |      |     |       |      |     | 54    | 107          |
| S10    | 15   | 11       | Ol      | 41.82  |       |       | 8.41  |      | 49.35 |       |       |      |      |       |       |    |      |       |     | 0.42 |     |     |      |     |       |      |     | 100   | 123          |
| S10    | 15   | 12       | Amph    | 50.53  | 0.31  | 10.05 | 2.65  |      | 19.86 | 11.78 | 1.14  |      |      |       |       |    |      | 0.69  |     |      |     |     |      |     |       |      |     | 97    | 112          |
| S10    | 15   | 13       | Chr     |        |       | 16.80 | 19.35 |      | 13.35 |       |       |      |      |       |       |    |      | 50.50 |     |      |     |     |      |     |       |      |     | 100   | 113          |
| S10    | 15.1 | 1        | Py      | 2.06   |       |       | 29.24 |      | 0.59  | 0.29  | 0.80  |      |      | 67.03 |       |    |      |       |     |      |     |     |      |     |       |      |     | 100   | 56           |
| S10    | 15.1 | 2        | Qz      | 99.64  |       |       | 0.30  |      |       |       |       |      |      |       |       |    |      |       |     |      |     |     |      |     | 0.06  |      |     | 100   | 108          |
| S10    | 15.1 | 3        | ?Chl    | 37.90  |       | 14.22 | 29.16 | 0.49 | 16.28 | 1.32  | 0.63  |      |      |       |       |    |      |       |     |      |     |     |      |     |       |      |     | 100   | 118          |
| S10    | 15.1 | 4        | Ads     | 56.51  | 1.36  | 15.27 | 8.66  |      | 4.11  | 8.43  | 5.65  |      |      |       |       |    |      |       |     |      |     |     |      |     |       |      |     | 100   | 116          |
| S10    | 15.2 | 1        | Qz      | 100.00 |       |       |       |      |       |       |       |      |      |       |       |    |      |       |     |      |     |     |      |     |       |      |     | 100   | 109          |
| S10    | 15.2 | 2        | Ep      | 40.31  |       | 27.46 | 6.28  |      |       | 22.95 |       |      |      |       |       |    |      |       |     |      |     |     |      |     |       |      |     | 97    | 109          |
| S10    | 15.2 | 3        | Mix     | 42.28  |       | 14.52 | 21.76 | 0.37 | 17.69 | 2.25  | 0.81  | 0.31 |      |       |       |    |      |       |     |      |     |     |      |     |       |      |     | 100   | 109          |
| S10    | 15.2 | 4        | Grt     | 41.54  |       | 17.61 | 5.96  |      |       | 34.89 |       |      |      |       |       |    |      |       |     |      |     |     |      |     |       |      |     | 100   | 120          |
| S10    | 15.2 | 5        | Py      | 0.26   |       |       | 28.17 |      |       |       | 0.24  |      |      | 71.08 |       |    |      |       |     | 0.24 |     |     |      |     |       |      |     | 100   | 117          |
| S10    | 15.2 | 6        | Qz      | 99.81  |       |       | 0.19  |      |       |       |       |      |      |       |       |    |      |       |     |      |     |     |      |     |       |      |     | 100   | 107          |
| S10    | 16   | 1        | Opx     | 57.98  |       | 1.54  | 5.82  |      | 34.38 | 0.28  |       |      |      |       |       |    |      |       |     |      |     |     |      |     |       |      |     | 100   | 113          |
| S10    | 16   | 2        | Ol      | 41.79  |       |       | 8.59  |      | 49.23 |       |       |      |      |       |       |    |      |       |     | 0.39 |     |     |      |     |       |      |     | 100   | 97           |
| S10    | 16   | 3        | Ol      | 42.00  |       |       | 7.75  |      | 49.96 |       |       |      |      |       |       |    |      |       |     | 0.29 |     |     |      |     |       |      |     | 100   | 116          |
| S10    | 16   | 4        | Ol      | 41.90  |       |       | 8.00  |      | 49.69 |       |       |      |      |       |       |    |      |       |     | 0.40 |     |     |      |     |       |      |     | 100   | 111          |
| S10    | 16   | 5        | Chl     | 27.19  |       | 22.41 | 23.08 |      | 12.07 |       |       | 0.26 |      |       |       |    |      |       |     |      |     |     |      |     |       |      |     | 85    | 110          |
| S10    | 16   | 6        | Ol      | 41.89  |       |       | 8.76  |      | 49.05 |       |       |      |      |       |       |    |      |       |     | 0.30 |     |     |      |     |       |      |     | 100   | 118          |
| S10    | 16   | 7        | Opx     | 57.46  |       | 2.01  | 5.31  |      | 34.26 | 0.37  |       |      |      |       |       |    |      | 0.58  |     |      |     |     |      |     |       |      |     | 100   | 105          |
| S10    | 16   | 8        | Opx     | 58.07  |       | 1.19  | 5.45  | 0.26 | 34.53 | 0.26  |       |      |      |       |       |    |      | 0.24  |     |      |     |     |      |     |       |      |     | 100   | 117          |

Table B5.2: EDS analyses from sample 10.

| Sample | Site | Position | Mineral | SiO2   | TiO2  | Al2O3 | FeO   | MnO  | MgO   | CaO   | Na2O | K2O | P2O5  | SO3   | F    | Cl    | V2O5 | Cr2O3 | CoO   | NiO  | ZnO | SrO | ZrO2 | BaO   | Yb2O3 | HfO2 | WO3  | Total | Actual Total |
|--------|------|----------|---------|--------|-------|-------|-------|------|-------|-------|------|-----|-------|-------|------|-------|------|-------|-------|------|-----|-----|------|-------|-------|------|------|-------|--------------|
| S10    | 16   | 9        | Dol     |        |       |       |       |      | 22.49 | 31.51 |      |     |       |       |      |       |      |       |       |      |     |     |      |       |       |      |      | 54    | 108          |
| S10    | 16   | 10       | Chl     | 24.83  |       | 22.19 | 27.12 |      | 10.86 |       |      |     |       |       |      |       |      |       |       |      |     |     |      |       |       |      |      | 85    | 110          |
| S10    | 16   | 11       | OI      | 41.81  |       |       | 8.04  |      | 49.84 |       |      |     |       |       |      |       |      |       |       | 0.30 |     |     |      |       |       |      |      | 100   | 116          |
| S10    | 16   | 12       | OI      | 41.98  |       |       | 7.81  |      | 49.83 |       |      |     |       |       |      |       |      |       |       | 0.38 |     |     |      |       |       |      |      | 100   | 110          |
| S10    | 16   | 13       | OI      | 41.89  |       |       | 7.96  |      | 49.77 |       |      |     |       |       |      |       |      |       |       | 0.38 |     |     |      |       |       |      |      | 100   | 118          |
| S10    | 16   | 14       | Qz      | 100.00 |       |       |       |      |       |       |      |     |       |       |      |       |      |       |       |      |     |     |      |       |       |      |      | 100   | 110          |
| S10    | 16   | 15       | Amph    | 41.36  | 1.46  | 13.00 | 17.93 | 0.27 | 12.81 | 9.64  | 0.53 |     |       |       |      |       |      |       |       |      |     |     |      |       |       |      |      | 97    | 114          |
| S10    | 16   | 16       | OI      | 41.91  |       |       | 8.37  |      | 49.28 |       |      |     |       |       |      |       |      |       |       | 0.44 |     |     |      |       |       |      |      | 100   | 117          |
| S10    | 16   | 17       | Opx     | 57.19  |       | 2.77  | 5.44  |      | 33.75 | 0.54  |      |     |       |       |      |       |      | 0.32  |       |      |     |     |      |       |       |      |      | 100   | 112          |
| S10    | 16   | 18       | OI      | 42.10  |       |       | 7.19  |      | 50.34 |       |      |     |       |       |      |       |      |       |       | 0.37 |     |     |      |       |       |      |      | 100   | 93           |
| S10    | 16.1 | 1        | Chl +   | 39.14  | 0.52  | 17.65 | 24.52 | 0.27 | 15.61 | 0.75  | 1.54 |     |       |       |      |       |      |       |       |      |     |     |      |       |       |      |      | 100   | 114          |
| S10    | 16.1 | 2        | Feohy + | 4.99   | 5.41  | 1.67  | 85.98 | 0.93 |       | 0.48  | 0.54 |     |       |       |      |       |      |       |       |      |     |     |      |       |       |      |      | 100   | 112          |
| S10    | 17   | 1        | Brt     |        |       |       |       |      |       |       |      |     |       | 36.45 |      |       |      |       | -0.11 |      |     |     |      | 63.66 |       |      |      | 100   | 110          |
| S10    | 17   | 2        | Chr     |        | 0.91  | 21.58 | 30.19 |      | 8.32  |       |      |     |       |       |      |       | 0.46 | 38.53 |       |      |     |     |      |       |       |      |      | 100   | 115          |
| S10    | 17   | 3        | OI      | 42.18  |       |       | 7.48  |      | 49.91 |       |      |     |       |       |      |       |      |       |       | 0.44 |     |     |      |       |       |      |      | 100   | 113          |
| S10    | 17   | 4        | Cpx     | 53.31  |       | 4.04  | 1.88  |      | 16.53 | 22.88 | 0.30 |     |       |       |      |       |      | 1.06  |       |      |     |     |      |       |       |      |      | 100   | 116          |
| S10    | 17   | 5        | Cpx     | 53.46  |       | 4.86  | 2.54  |      | 16.09 | 21.85 | 0.40 |     |       |       |      |       |      | 0.81  |       |      |     |     |      |       |       |      |      | 100   | 98           |
| S10    | 17   | 6        | Dol     |        |       |       |       |      | 22.66 | 31.34 |      |     |       |       |      |       |      |       |       |      |     |     |      |       |       |      |      | 54    | 115          |
| S10    | 17   | 7        | OI      | 41.86  |       |       | 9.31  |      | 48.53 |       |      |     |       |       |      |       |      |       |       | 0.30 |     |     |      |       |       |      |      | 100   | 207          |
| S10    | 17   | 8        | OI      | 41.90  |       |       | 7.74  |      | 49.93 |       |      |     |       |       |      |       |      |       |       | 0.43 |     |     |      |       |       |      |      | 100   | 102          |
| S10    | 17   | 9        | OI      | 41.94  |       |       | 6.82  |      | 50.82 |       |      |     |       |       |      |       |      |       |       | 0.43 |     |     |      |       |       |      |      | 100   | 112          |
| S10    | 17   | 10       | OI      | 41.95  |       |       | 7.31  |      | 50.43 |       |      |     |       |       |      |       |      |       |       | 0.31 |     |     |      |       |       |      |      | 100   | 110          |
| S10    | 17   | 11       | Spl     |        |       | 49.50 | 13.37 |      | 18.49 |       |      |     |       |       |      |       |      | 18.64 |       |      |     |     |      |       |       |      |      | 100   | 115          |
| S10    | 17   | 12       | OI      | 43.33  |       |       | 11.49 |      | 44.05 |       |      |     |       |       |      |       |      |       |       | 0.65 |     |     |      |       |       |      |      | 100   | 56           |
| S10    | 17   | 13       | Fl      |        |       |       |       |      |       | 57.07 |      |     |       |       |      | 42.21 |      |       |       |      |     |     | 0.72 |       |       |      |      | 100   | 102          |
| S10    | 17   | 14       | Chr     |        |       | 11.73 | 22.78 |      | 8.92  |       |      |     |       |       |      |       |      | 56.57 |       |      |     |     |      |       |       |      |      | 100   | 119          |
| S10    | 17   | 15       | "Ilm"   |        | 20.05 |       | 77.57 | 1.62 |       |       |      |     |       |       |      |       | 0.76 |       |       |      |     |     |      |       |       |      |      | 100   | 111          |
| S10    | 17   | 16       | OI      | 41.98  |       |       | 8.30  |      | 49.25 |       |      |     |       |       |      |       |      |       |       | 0.47 |     |     |      |       |       |      |      | 100   | 113          |
| S10    | 17   | 17       | Cpx     | 53.03  | 1.24  | 3.12  | 4.03  |      | 16.13 | 21.50 | 0.34 |     |       |       |      |       |      | 0.60  |       |      |     |     |      |       |       |      |      | 100   | 121          |
| S10    | 17   | 18       | Ep      | 41.73  |       | 23.93 | 7.31  |      | 2.88  | 21.14 |      |     |       |       |      |       |      |       |       |      |     |     |      |       |       |      |      | 97    | 110          |
| S10    | 17   | 19       | Spl     |        |       | 37.78 | 17.05 |      | 15.46 |       |      |     |       |       |      |       |      | 29.71 |       |      |     |     |      |       |       |      |      | 100   | 116          |
| S10    | 17   | 20       | Cpx     | 52.87  |       | 5.16  | 2.45  |      | 16.33 | 22.04 | 0.33 |     |       |       |      |       |      | 0.83  |       |      |     |     |      |       |       |      |      | 100   | 112          |
| S10    | 17   | 21       | Opx     | 57.55  |       | 2.06  | 5.43  |      | 34.26 | 0.44  |      |     |       |       |      |       |      | 0.26  |       |      |     |     |      |       |       |      |      | 100   | 118          |
| S10    | 17   | 22       | Chl     | 26.03  |       | 20.13 | 26.38 | 0.47 | 11.98 |       |      |     |       |       |      |       |      |       |       |      |     |     |      |       |       |      |      | 85    | 107          |
| S10    | 18   | 1        | Mag     | 3.13   |       |       | 94.94 |      | 1.25  | 0.68  |      |     |       |       |      |       |      |       |       |      |     |     |      |       |       |      |      | 100   | 126          |
| S10    | 18   | 2        | Feohy   |        | 5.36  | 1.95  | 89.98 | 0.92 | 1.23  |       |      |     |       |       |      |       | 0.56 |       |       |      |     |     |      |       |       |      |      | 100   | 113          |
| S10    | 18   | 3        | Chr     |        |       | 8.84  | 20.46 |      | 9.70  |       |      |     |       |       |      |       |      | 61.00 |       |      |     |     |      |       |       |      |      | 100   | 120          |
| S10    | 18   | 4        | OI      | 42.01  |       |       | 8.45  |      | 49.16 |       |      |     |       |       |      |       |      |       |       | 0.38 |     |     |      |       |       |      |      | 100   | 112          |
| S10    | 18   | 5        | OI      | 42.20  |       |       | 7.67  |      | 49.80 |       |      |     |       |       |      |       |      |       |       | 0.33 |     |     |      |       |       |      |      | 100   | 117          |
| S10    | 18   | 6        | Ap      |        |       |       |       |      |       | 48.59 |      |     | 44.27 |       | 5.52 |       |      |       |       |      |     |     |      |       |       |      | 1.63 | 100   | 53           |
| S10    | 18   | 7        | OI      | 41.80  |       |       | 8.25  |      | 49.62 |       |      |     |       |       |      |       |      |       |       | 0.32 |     |     |      |       |       |      |      | 100   | 115          |
| S10    | 18   | 8        | Cpx     | 54.12  | 0.42  | 2.94  | 5.64  | 0.26 | 16.13 | 19.60 | 0.89 |     |       |       |      |       |      |       |       |      |     |     |      |       |       |      |      | 100   | 108          |
| S10    | 18   | 9        | Ttn     | 33.37  | 29.21 | 5.87  | 0.84  |      |       | 26.84 |      |     |       |       | 3.87 |       |      |       |       |      |     |     |      |       |       |      |      | 100   | 120          |
| S10    | 18   | 10       | OI      | 42.23  |       |       | 7.89  |      | 49.52 |       |      |     |       |       |      |       |      |       |       | 0.35 |     |     |      |       |       |      |      | 100   | 110          |

Table B5.2: EDS analyses from sample 10.

| Sample | Site | Position | Mineral       | SiO2   | TiO2  | Al2O3 | FeO   | MnO  | MgO   | CaO   | Na2O | K2O  | P2O5 | SO3 | F     | Cl   | V2O5 | Cr2O3 | CoO | NiO  | ZnO | SrO | ZrO2  | BaO | Yb2O3 | HfO2 | WO3 | Total | Actual Total |
|--------|------|----------|---------------|--------|-------|-------|-------|------|-------|-------|------|------|------|-----|-------|------|------|-------|-----|------|-----|-----|-------|-----|-------|------|-----|-------|--------------|
| S10    | 18   | 11       | Ol            | 42.34  |       |       | 6.31  |      | 51.06 |       |      |      |      |     |       |      |      |       |     | 0.29 |     |     |       |     |       |      |     | 100   | 105          |
| S10    | 18   | 12       | Ol            | 42.24  |       |       | 7.51  |      | 49.90 |       |      |      |      |     |       |      |      |       |     | 0.35 |     |     |       |     |       |      |     | 100   | 120          |
| S10    | 18   | 13       | Spl           |        | 0.32  | 32.49 | 19.99 |      | 13.67 |       |      |      |      |     |       |      |      | 33.53 |     |      |     |     |       |     |       |      |     | 100   | 117          |
| S10    | 18   | 14       | Hbl           | 48.06  | 1.10  | 9.77  | 6.85  |      | 17.64 | 11.45 | 1.86 |      |      |     |       |      |      | 0.27  |     |      |     |     |       |     |       |      |     | 97    | 121          |
| S10    | 18   | 15       | Chr           |        |       | 20.55 | 16.98 |      | 13.43 |       |      |      |      |     |       |      | 0.34 | 48.71 |     |      |     |     |       |     |       |      |     | 100   | 116          |
| S10    | 18   | 16       | Ol            | 41.53  |       |       | 9.58  |      | 48.52 |       |      |      |      |     |       |      |      |       |     | 0.37 |     |     |       |     |       |      |     | 100   | 118          |
| S10    | 18   | 17       | Ol            | 41.96  |       |       | 7.54  |      | 50.23 |       |      |      |      |     |       |      |      |       |     | 0.28 |     |     |       |     |       |      |     | 100   | 117          |
| S10    | 18   | 18       | Chr           |        |       | 10.18 | 22.69 |      | 8.24  |       |      |      |      |     |       |      |      | 58.88 |     |      |     |     |       |     |       |      |     | 100   | 101          |
| S10    | 18   | 19       | Chr           |        |       | 21.36 | 15.87 |      | 13.55 |       |      |      |      |     |       |      |      | 49.22 |     |      |     |     |       |     |       |      |     | 100   | 121          |
| S10    | 18   | 20       | Chr           |        |       | 11.95 | 19.89 |      | 10.94 |       |      |      |      |     |       |      | 0.39 | 56.83 |     |      |     |     |       |     |       |      |     | 100   | 120          |
| S10    | 18   | 21       | Opx           | 56.48  |       | 3.05  | 5.79  |      | 33.43 | 0.74  |      |      |      |     |       |      |      | 0.51  |     |      |     |     |       |     |       |      |     | 100   | 115          |
| S10    | 18   | 22       | Ol            | 46.71  |       | 1.51  | 7.21  |      | 43.74 |       |      |      |      |     |       | 0.34 |      |       |     | 0.48 |     |     |       |     |       |      |     | 100   | 111          |
| S10    | 18.1 | 1        | TiO2          |        | 99.75 |       |       |      |       | 0.25  |      |      |      |     |       |      |      |       |     |      |     |     |       |     |       |      |     | 100   | 117          |
| S10    | 18.1 | 2        | Qz            | 100.00 |       |       |       |      |       |       |      |      |      |     |       |      |      |       |     |      |     |     |       |     |       |      |     | 100   | 56           |
| S10    | 18.1 | 3        | Fl            |        |       |       |       |      | 0.53  | 48.96 |      |      |      |     | 50.51 |      |      |       |     |      |     |     |       |     |       |      |     | 100   | 113          |
| S10    | 18.1 | 4        | Ads           | 59.83  |       | 24.91 | 0.84  |      |       | 7.50  | 6.71 | 0.21 |      |     |       |      |      |       |     |      |     |     |       |     |       |      |     | 100   | 119          |
| S10    | 18.1 | 5        | Feohy + Ttn + | 14.78  | 3.44  | 4.91  | 69.79 | 0.35 | 4.51  | 2.23  |      |      |      |     |       |      |      |       |     |      |     |     |       |     |       |      |     | 100   | 119          |
| S10    | 18.1 | 6        | Ttn ?         | 39.00  | 24.45 | 4.47  | 5.98  |      | 1.74  | 24.35 |      |      |      |     |       |      |      |       |     |      |     |     |       |     |       |      |     | 100   | 111          |
| S10    | 19   | 1        | Cpx           | 54.20  | 0.48  | 2.40  | 4.85  |      | 17.00 | 20.57 |      |      |      |     |       |      |      | 0.50  |     |      |     |     |       |     |       |      |     | 100   | 117          |
| S10    | 19   | 2        | Chr           |        | 0.37  | 23.14 | 18.21 |      | 15.49 |       |      |      |      |     |       |      |      | 42.79 |     |      |     |     |       |     |       |      |     | 100   | 94           |
| S10    | 19   | 3        | Chr           |        |       | 15.06 | 19.52 |      | 11.09 |       |      |      |      |     |       |      |      | 54.33 |     |      |     |     |       |     |       |      |     | 100   | 107          |
| S10    | 19   | 4        | Amph          | 44.47  | 0.63  | 13.46 | 9.87  |      | 14.07 | 11.11 | 3.03 | 0.35 |      |     |       |      |      |       |     |      |     |     |       |     |       |      |     | 97    | 113          |
| S10    | 19   | 5        | Pg            | 48.34  |       | 38.15 | 0.34  |      |       | 0.32  | 7.12 | 0.73 |      |     |       |      |      |       |     |      |     |     |       |     |       |      |     | 95    | 99           |
| S10    | 19   | 6        | Ol            | 42.08  |       |       | 7.25  |      | 50.35 |       |      |      |      |     |       |      |      |       |     | 0.32 |     |     |       |     |       |      |     | 100   | 108          |
| S10    | 19   | 7        | Ttn           | 29.93  | 36.53 | 1.92  | 0.42  |      |       | 29.21 |      |      |      |     | 2.00  |      |      |       |     |      |     |     |       |     |       |      |     | 100   | 117          |
| S10    | 19   | 8        | Ol            | 42.09  |       |       | 8.28  |      | 49.25 |       |      |      |      |     |       |      |      |       |     | 0.38 |     |     |       |     |       |      |     | 100   | 115          |
| S10    | 19   | 9        | Grt           | 39.28  |       | 21.09 | 30.50 | 0.71 | 1.13  | 7.30  |      |      |      |     |       |      |      |       |     |      |     |     |       |     |       |      |     | 100   | 111          |
| S10    | 19   | 10       | Ol            | 42.26  |       |       | 6.04  |      | 51.25 |       |      |      |      |     |       |      |      |       |     | 0.44 |     |     |       |     |       |      |     | 100   | 115          |
| S10    | 19   | 11       | Opx           | 59.03  |       |       | 5.33  |      | 35.64 |       |      |      |      |     |       |      |      |       |     |      |     |     |       |     |       |      |     | 100   | 111          |
| S10    | 19   | 12       | ?             | 47.79  |       | 24.96 |       |      |       | 27.25 |      |      |      |     |       |      |      |       |     |      |     |     |       |     |       |      |     | 100   | 101          |
| S10    | 19   | 13       | Cpx           | 51.15  |       | 2.97  | 5.67  |      | 18.49 | 20.16 | 0.42 |      |      |     |       |      |      | 1.13  |     |      |     |     |       |     |       |      |     | 100   | 112          |
| S10    | 19   | 14       | Pg            | 48.72  |       | 37.80 | 0.30  |      |       |       | 7.31 | 0.87 |      |     |       |      |      |       |     |      |     |     |       |     |       |      |     | 95    | 99           |
| S10    | 19   | 15       | Ol            | 42.16  |       |       | 7.79  |      | 49.69 |       |      |      |      |     |       |      |      |       |     | 0.36 |     |     |       |     |       |      |     | 100   | 112          |
| S10    | 19   | 16       | Ol            | 41.85  |       |       | 8.33  |      | 49.42 |       |      |      |      |     |       |      |      |       |     | 0.40 |     |     |       |     |       |      |     | 100   | 122          |
| S10    | 19   | 17       | Ti-Mag +      | 2.79   | 12.99 | 4.94  | 74.32 | 0.84 | 2.80  |       |      |      |      |     |       |      | 1.32 |       |     |      |     |     |       |     |       |      |     | 100   | 106          |
| S10    | 19   | 18       | Dol           |        |       |       |       |      | 22.42 | 31.58 |      |      |      |     |       |      |      |       |     |      |     |     |       |     |       |      |     | 54    | 109          |
| S10    | 19   | 19       | Spl           |        |       | 43.77 | 14.95 |      | 17.16 |       |      |      |      |     |       |      |      | 24.11 |     |      |     |     |       |     |       |      |     | 100   | 107          |
| S10    | 19   | 20       | Zrn           | 30.97  |       |       |       |      |       |       |      |      |      |     |       |      |      |       |     |      |     |     | 67.52 |     |       | 1.51 |     | 100   | 109          |
| S10    | 20   | 1        | Chr           |        |       | 12.20 | 20.24 |      | 10.26 |       |      |      |      |     |       |      |      | 57.30 |     |      |     |     |       |     |       |      |     | 100   | 107          |
| S10    | 20   | 2        | Chr           |        |       | 16.21 | 18.54 |      | 11.89 |       |      |      |      |     |       |      | 0.43 | 52.92 |     |      |     |     |       |     |       |      |     | 100   | 226          |
| S10    | 20   | 3        | Ol            | 41.98  |       |       | 7.29  |      | 50.43 |       |      |      |      |     |       |      |      |       |     | 0.31 |     |     |       |     |       |      |     | 100   | 109          |
| S10    | 20   | 4        | Dol           |        |       |       |       |      | 22.98 | 31.02 |      |      |      |     |       |      |      |       |     |      |     |     |       |     |       |      |     | 54    | 108          |
| S10    | 20   | 5        | Chl           | 26.21  |       | 20.29 | 25.70 | 0.35 | 12.20 |       |      |      |      |     |       |      |      | 0.26  |     |      |     |     |       |     |       |      |     | 85    | 110          |
| S10    | 20   | 6        | Ol            | 41.80  |       |       | 8.60  |      | 49.22 |       |      |      |      |     |       |      |      |       |     | 0.38 |     |     |       |     |       |      |     | 100   | 116          |

Table B5.2: EDS analyses from sample 10.

| Sample | Site | Position | Mineral | SiO2  | TiO2 | Al2O3 | FeO   | MnO  | MgO   | CaO   | Na2O | K2O   | P2O5 | SO3  | F     | Cl | V2O5 | Cr2O3 | CoO | NiO  | ZnO | SrO | ZrO2 | BaO | Yb2O3 | HfO2 | WO3 | Total | Actual Total |
|--------|------|----------|---------|-------|------|-------|-------|------|-------|-------|------|-------|------|------|-------|----|------|-------|-----|------|-----|-----|------|-----|-------|------|-----|-------|--------------|
| S10    | 20   | 7        | Cpx     | 54.03 |      | 3.66  | 2.10  |      | 16.96 | 22.42 |      |       |      |      |       |    |      | 0.83  |     |      |     |     |      |     |       |      |     | 100   | 112          |
| S10    | 20   | 8        | Ol      | 42.06 |      |       | 7.42  |      | 50.22 |       |      |       |      |      |       |    |      |       |     | 0.30 |     |     |      |     |       |      |     | 100   | 112          |
| S10    | 20   | 9        | Ol      | 42.16 |      |       | 8.23  |      | 49.61 |       |      |       |      |      |       |    |      |       |     |      |     |     |      |     |       |      |     | 100   | 114          |
| S10    | 20   | 10       | Chl     | 29.93 |      | 15.85 | 23.36 | 0.26 | 15.28 | 0.32  |      |       |      |      |       |    |      |       |     |      |     |     |      |     |       |      |     | 85    | 108          |
| S10    | 20   | 11       | Chr     |       |      | 24.97 | 20.01 |      | 12.42 |       |      |       |      |      |       |    |      | 42.60 |     |      |     |     |      |     |       |      |     | 100   | 113          |
| S10    | 20   | 12       | Amph    | 44.30 | 2.70 | 8.95  | 17.93 | 0.30 | 11.04 | 10.78 | 0.70 | 0.31  |      |      |       |    |      |       |     |      |     |     |      |     |       |      |     | 97    | 119          |
| S10    | 20   | 13       | Ol      | 42.03 |      |       | 8.24  |      | 49.42 |       |      |       |      |      |       |    |      |       |     | 0.31 |     |     |      |     |       |      |     | 100   | 119          |
| S10    | 20   | 14       | Ol      | 41.78 |      |       | 8.24  |      | 49.61 |       |      |       |      |      |       |    |      |       |     | 0.37 |     |     |      |     |       |      |     | 100   | 118          |
| S10    | 20   | 15       | Cpx     | 53.46 | 0.86 | 2.51  | 6.02  |      | 15.76 | 21.09 |      |       |      |      |       |    |      | 0.31  |     |      |     |     |      |     |       |      |     | 100   | 109          |
| S10    | 20   | 16       | Grt     | 39.19 |      | 21.00 | 32.21 | 0.30 | 2.09  | 5.21  |      |       |      |      |       |    |      |       |     |      |     |     |      |     |       |      |     | 100   | 117          |
| S10    | 20   | 17       | Ol      | 41.92 |      |       | 7.86  |      | 49.79 |       |      |       |      |      |       |    |      |       |     | 0.43 |     |     |      |     |       |      |     | 100   | 117          |
| S10    | 20   | 18       | Opx     | 57.86 |      | 1.72  | 5.33  |      | 34.50 | 0.27  |      |       |      |      |       |    |      | 0.33  |     |      |     |     |      |     |       |      |     | 100   | 114          |
| S10    | 21   | 1        | Chr     |       |      | 19.28 | 17.00 |      | 12.66 |       |      |       |      |      |       |    |      | 51.06 |     |      |     |     |      |     |       |      |     | 100   | 107          |
| S10    | 21   | 2        | Opx     | 58.54 |      | 0.55  | 5.01  |      | 35.15 | 0.33  |      |       |      |      |       |    |      | 0.43  |     |      |     |     |      |     |       |      |     | 100   | 81           |
| S10    | 21   | 3        | Chr +   | 6.24  | 0.61 | 1.67  | 48.56 | 0.82 | 5.14  |       |      |       |      |      |       |    |      | 36.96 |     |      |     |     |      |     |       |      |     | 100   | 57           |
| S10    | 21   | 4        | Ol      | 42.02 |      |       | 7.42  |      | 50.20 |       |      |       |      |      |       |    |      |       |     | 0.36 |     |     |      |     |       |      |     | 100   | 99           |
| S10    | 21   | 5        | Cpx     | 53.10 | 1.40 | 2.82  | 4.82  |      | 16.21 | 20.51 | 0.54 |       |      |      |       |    |      | 0.61  |     |      |     |     |      |     |       |      |     | 100   | 122          |
| S10    | 21   | 6        | Chr     |       |      | 25.98 | 22.06 |      | 11.94 |       |      |       |      |      |       |    |      | 40.02 |     |      |     |     |      |     |       |      |     | 100   | 113          |
| S10    | 21   | 7        | Ads +   | 45.71 | 1.34 | 11.82 | 18.99 | 0.40 | 13.39 | 7.24  | 1.10 |       |      |      |       |    |      |       |     |      |     |     |      |     |       |      |     | 100   | 114          |
| S10    | 21   | 8        | Act     | 58.88 |      |       | 3.76  |      | 21.54 | 12.81 |      |       |      |      |       |    |      |       |     |      |     |     |      |     |       |      |     | 97    | 117          |
| S10    | 21   | 9        | Ol      | 41.54 |      |       | 8.76  |      | 49.31 |       |      |       |      |      |       |    |      |       |     | 0.39 |     |     |      |     |       |      |     | 100   | 117          |
| S10    | 21   | 10       | Chr     |       |      | 22.67 | 17.49 |      | 13.80 |       |      |       |      |      |       |    | 0.35 | 45.69 |     |      |     |     |      |     |       |      |     | 100   | 116          |
| S10    | 21   | 11       | Ol      | 41.61 |      |       | 8.55  |      | 49.48 |       |      |       |      |      |       |    |      |       |     | 0.36 |     |     |      |     |       |      |     | 100   | 119          |
| S10    | 21   | 12       | Ol      | 42.11 |      |       | 8.35  |      | 49.11 |       |      |       |      |      |       |    |      |       |     | 0.43 |     |     |      |     |       |      |     | 100   | 114          |
| S10    | 21   | 13       | Ol      | 41.89 |      |       | 7.75  |      | 49.94 |       |      |       |      |      |       |    |      |       |     | 0.41 |     |     |      |     |       |      |     | 100   | 59           |
| S10    | 21   | 14       | Chl     | 26.38 |      | 21.71 | 22.14 |      | 14.23 |       | 0.54 |       |      |      |       |    |      |       |     |      |     |     |      |     |       |      |     | 85    | 116          |
| S10    | 21   | 15       | Chr     |       |      | 11.38 | 25.66 |      | 8.75  |       |      |       |      |      |       |    |      | 54.22 |     |      |     |     |      |     |       |      |     | 100   | 119          |
| S10    | 21   | 16       | Ol      | 41.87 |      |       | 9.39  |      | 48.38 |       |      |       |      |      |       |    |      |       |     | 0.36 |     |     |      |     |       |      |     | 100   | 123          |
| S10    | 21   | 17       | Dol     |       |      |       | 0.35  |      | 22.32 | 31.33 |      |       |      |      |       |    |      |       |     |      |     |     |      |     |       |      |     | 54    | 115          |
| S10    | 21   | 18       | Ol      | 41.82 |      |       | 8.44  |      | 49.27 |       |      |       |      |      |       |    |      |       |     | 0.47 |     |     |      |     |       |      |     | 100   | 122          |
| S10    | 21   | 19       | Ol      | 41.82 |      |       | 8.85  |      | 48.90 |       |      |       |      |      |       |    |      |       |     | 0.44 |     |     |      |     |       |      |     | 100   | 120          |
| S10    | 21   | 20       | Fl      |       |      |       |       |      |       | 54.64 |      |       |      |      | 45.36 |    |      |       |     |      |     |     |      |     |       |      |     | 100   | 56           |
| S10    | 21   | 21       | Ol      | 42.34 |      |       | 7.47  |      | 49.83 |       |      |       |      |      |       |    |      |       |     | 0.36 |     |     |      |     |       |      |     | 100   | 113          |
| S10    | 22   | 1        | Ol      | 41.78 |      |       | 8.48  |      | 49.40 |       |      |       |      |      |       |    |      |       |     | 0.34 |     |     |      |     |       |      |     | 100   | 120          |
| S10    | 22   | 2        | Ap      |       |      |       |       |      | 49.73 |       |      | 44.69 |      | 5.58 |       |    |      |       |     |      |     |     |      |     |       |      |     | 100   | 100          |
| S10    | 22   | 3        | Chr     |       |      | 14.40 | 21.15 |      | 11.04 |       |      |       |      |      |       |    |      | 53.42 |     |      |     |     |      |     |       |      |     | 100   | 120          |
| S10    | 22   | 4        | Cpx     | 54.74 | 0.48 | 2.00  | 5.38  |      | 17.51 | 19.52 | 0.37 |       |      |      |       |    |      |       |     |      |     |     |      |     |       |      |     | 100   | 96           |
| S10    | 22   | 5        | Ads     | 57.98 | 1.12 | 15.58 | 8.36  |      | 3.74  | 6.39  | 6.83 |       |      |      |       |    |      |       |     |      |     |     |      |     |       |      |     | 100   | 119          |
| S10    | 22   | 6        | Chr     |       |      | 12.21 | 18.55 |      | 11.43 |       |      |       |      |      |       |    |      | 57.81 |     |      |     |     |      |     |       |      |     | 100   | 116          |
| S10    | 22   | 7        | Mag     | 1.27  |      |       | 98.73 |      |       |       |      |       |      |      |       |    |      |       |     |      |     |     |      |     |       |      |     | 100   | 120          |
| S10    | 22   | 8        | Ab      | 65.11 |      | 22.13 | 0.38  |      |       | 1.97  | 9.37 | 1.03  |      |      |       |    |      |       |     |      |     |     |      |     |       |      |     | 100   | 112          |
| S10    | 22   | 9        | Ol      | 42.11 |      |       | 7.53  |      | 50.00 |       |      |       |      |      |       |    |      |       |     | 0.36 |     |     |      |     |       |      |     | 100   | 109          |
| S10    | 22   | 10       | Ep      | 40.26 |      | 23.80 | 10.25 | 0.30 |       | 22.38 |      |       |      |      |       |    |      |       |     |      |     |     |      |     |       |      |     | 97    | 58           |
| S10    | 22   | 11       | Ol      | 41.91 |      |       | 7.80  |      | 49.85 |       |      |       |      |      |       |    |      |       |     | 0.44 |     |     |      |     |       |      |     | 100   | 108          |



Table B5.2: EDS analyses from sample 10.

| Sample | Site | Position | Mineral    | SiO2  | TiO2  | Al2O3 | FeO   | MnO  | MgO   | CaO   | Na2O | K2O   | P2O5 | SO3 | F     | Cl | V2O5 | Cr2O3 | CoO | NiO  | ZnO  | SrO | ZrO2 | BaO | Yb2O3 | HfO2 | WO3 | Total | Actual Total |
|--------|------|----------|------------|-------|-------|-------|-------|------|-------|-------|------|-------|------|-----|-------|----|------|-------|-----|------|------|-----|------|-----|-------|------|-----|-------|--------------|
| S10    | 22   | 12       | Fl         |       |       |       |       |      |       | 56.20 |      |       |      |     | 43.80 |    |      |       |     |      |      |     |      |     |       |      |     | 100   | 116          |
| S10    | 22   | 13       | Chr        |       |       | 18.78 | 19.80 |      | 11.45 |       |      |       |      |     |       |    |      | 49.96 |     |      |      |     |      |     |       |      |     | 100   | 97           |
| S10    | 22   | 14       | Grt        | 39.35 |       | 20.62 | 24.16 | 7.73 | 0.91  | 7.23  |      |       |      |     |       |    |      |       |     |      |      |     |      |     |       |      |     | 100   | 103          |
| S10    | 22   | 15       | Ol         | 42.11 |       |       | 6.86  |      | 50.69 |       |      |       |      |     |       |    |      |       |     | 0.35 |      |     |      |     |       |      |     | 100   | 94           |
| S10    | 22   | 16       | Ol         | 41.81 |       |       | 8.83  |      | 49.03 |       |      |       |      |     |       |    |      |       |     | 0.32 |      |     |      |     |       |      |     | 100   | 119          |
| S10    | 22   | 17       | Ol         | 41.96 |       |       | 7.75  |      | 49.93 |       |      |       |      |     |       |    |      |       |     | 0.36 |      |     |      |     |       |      |     | 100   | 110          |
| S10    | 22   | 18       | Ms +       | 52.14 | 0.48  | 22.82 | 5.27  |      | 3.19  |       | 0.27 | 10.83 |      |     |       |    |      |       |     |      |      |     |      |     |       |      |     | 95    | 96           |
| S10    | 22.1 | 1        | Spl        |       |       | 30.79 | 17.83 |      | 13.78 |       |      |       |      |     |       |    |      | 37.60 |     |      |      |     |      |     |       |      |     | 100   | 114          |
| S10    | 22.1 | 2        | Chr        |       |       | 22.42 | 28.59 |      | 7.51  |       |      |       |      |     |       |    |      | 40.90 |     |      | 0.57 |     |      |     |       |      |     | 100   | 116          |
| S10    | 22.1 | 3        | ?Chl + Srp | 44.79 |       | 12.52 | 12.59 |      | 27.30 | 2.05  | 0.43 |       |      |     |       |    |      | 0.33  |     |      |      |     |      |     |       |      |     | 100   | 115          |
| S10    | 23   | 1        | Chr        |       |       | 21.84 | 17.44 |      | 14.54 |       |      |       |      |     |       |    |      | 46.18 |     |      |      |     |      |     |       |      |     | 100   | 122          |
| S10    | 23   | 2        | Opx        | 56.36 |       | 3.40  | 5.72  |      | 33.60 | 0.28  |      |       |      |     |       |    |      | 0.63  |     |      |      |     |      |     |       |      |     | 100   | 115          |
| S10    | 23   | 3        | Opx        | 56.15 |       | 4.04  | 5.74  |      | 33.05 | 0.32  |      |       |      |     |       |    |      | 0.70  |     |      |      |     |      |     |       |      |     | 100   | 113          |
| S10    | 23   | 4        | Ol         | 42.23 |       |       | 7.54  |      | 49.88 |       |      |       |      |     |       |    |      |       |     | 0.36 |      |     |      |     |       |      |     | 100   | 104          |
| S10    | 23   | 5        | Opx        | 54.85 |       | 4.59  | 5.92  |      | 33.35 | 0.34  |      |       |      |     |       |    |      | 0.95  |     |      |      |     |      |     |       |      |     | 100   | 109          |
| S10    | 23   | 6        | Opx        | 56.82 |       | 3.01  | 5.40  |      | 33.75 | 0.41  |      |       |      |     |       |    |      | 0.62  |     |      |      |     |      |     |       |      |     | 100   | 118          |
| S10    | 23   | 7        | Chl        | 27.14 |       | 20.60 | 20.21 |      | 17.05 |       |      |       |      |     |       |    |      |       |     |      |      |     |      |     |       |      |     | 85    | 122          |
| S10    | 23   | 8        | Opx        | 57.82 |       | 1.90  | 5.32  |      | 34.52 | 0.45  |      |       |      |     |       |    |      |       |     |      |      |     |      |     |       |      |     | 100   | 118          |
| S10    | 23   | 9        | Spl        |       |       | 46.65 | 13.47 |      | 18.25 |       |      |       |      |     |       |    |      | 21.63 |     |      |      |     |      |     |       |      |     | 100   | 108          |
| S10    | 23   | 10       | Spl        |       |       | 35.44 | 16.46 |      | 15.89 |       |      |       |      |     |       |    |      | 32.21 |     |      |      |     |      |     |       |      |     | 100   | 101          |
| S10    | 23   | 11       | Chr        |       |       | 18.96 | 19.33 |      | 11.53 |       |      |       |      |     |       |    |      | 50.18 |     |      |      |     |      |     |       |      |     | 100   | 114          |
| S10    | 23   | 12       | Ol         | 42.07 |       |       | 8.12  |      | 49.80 |       |      |       |      |     |       |    |      |       |     |      |      |     |      |     |       |      |     | 100   | 109          |
| S10    | 23   | 13       | Ol         | 42.02 |       |       | 8.45  |      | 49.17 |       |      |       |      |     |       |    |      |       |     | 0.36 |      |     |      |     |       |      |     | 100   | 108          |
| S10    | 23   | 14       | Chr        |       |       | 23.72 | 15.52 |      | 14.57 |       |      |       |      |     |       |    |      | 46.19 |     |      |      |     |      |     |       |      |     | 100   | 117          |
| S10    | 23   | 15       | Cpx        | 52.05 | 1.79  | 2.78  | 9.28  | 0.28 | 13.02 | 20.02 | 0.78 |       |      |     |       |    |      |       |     |      |      |     |      |     |       |      |     | 100   | 119          |
| S10    | 24   | 1        | Chr        |       |       | 13.00 | 19.57 |      | 10.55 |       |      |       |      |     |       |    |      | 56.88 |     |      |      |     |      |     |       |      |     | 100   | 112          |
| S10    | 24   | 2        | Spl        |       |       | 36.30 | 14.18 |      | 16.53 |       |      |       |      |     |       |    |      | 32.99 |     |      |      |     |      |     |       |      |     | 100   | 109          |
| S10    | 24   | 3        | Opx        | 58.55 |       | 1.13  | 4.68  |      | 34.88 | 0.42  |      |       |      |     |       |    |      | 0.34  |     |      |      |     |      |     |       |      |     | 100   | 110          |
| S10    | 24   | 4        | Ol         | 41.87 |       |       | 8.38  |      | 49.31 |       |      |       |      |     |       |    |      |       |     | 0.43 |      |     |      |     |       |      |     | 100   | 116          |
| S10    | 24   | 5        | Opx        | 57.58 |       | 2.15  | 5.48  | 0.23 | 34.09 | 0.46  |      |       |      |     |       |    |      |       |     |      |      |     |      |     |       |      |     | 100   | 118          |
| S10    | 24   | 6        | Ol         | 41.74 |       |       | 7.90  | 0.24 | 49.72 |       |      |       |      |     |       |    |      |       |     | 0.40 |      |     |      |     |       |      |     | 100   | 119          |
| S10    | 24   | 7        | Ol         | 42.36 |       |       | 7.14  |      | 50.19 |       |      |       |      |     |       |    |      |       |     | 0.31 |      |     |      |     |       |      |     | 100   | 107          |
| S10    | 24   | 8        | Spl        |       | 0.42  | 36.12 | 17.55 |      | 16.12 |       |      |       |      |     |       |    |      | 29.79 |     |      |      |     |      |     |       |      |     | 100   | 57           |
| S10    | 24   | 9        | Cpx        | 53.50 |       | 3.71  | 4.04  |      | 17.03 | 20.87 |      |       |      |     |       |    |      | 0.86  |     |      |      |     |      |     |       |      |     | 100   | 215          |
| S10    | 24   | 10       | Chr        |       |       | 17.26 | 17.32 |      | 12.20 |       |      |       |      |     |       |    |      | 53.22 |     |      |      |     |      |     |       |      |     | 100   | 116          |
| S10    | 24   | 11       | Ol         | 42.20 |       |       | 8.48  |      | 48.92 |       |      |       |      |     |       |    |      |       |     | 0.40 |      |     |      |     |       |      |     | 100   | 108          |
| S10    | 24   | 12       | Opx        | 57.14 |       | 2.70  | 5.68  |      | 33.75 | 0.33  |      |       |      |     |       |    |      | 0.40  |     |      |      |     |      |     |       |      |     | 100   | 100          |
| S10    | 24   | 13       | Grt        | 39.20 |       | 20.97 | 28.77 | 5.61 | 3.36  | 2.08  |      |       |      |     |       |    |      |       |     |      |      |     |      |     |       |      |     | 100   | 125          |
| S10    | 24   | 14       | Chl        | 29.23 |       | 15.44 | 28.87 | 0.23 | 11.22 |       |      |       |      |     |       |    |      |       |     |      |      |     |      |     |       |      |     | 85    | 113          |
| S10    | 24   | 15       | Opx        | 56.05 |       | 4.00  | 5.57  |      | 32.49 | 1.07  |      |       |      |     |       |    |      | 0.82  |     |      |      |     |      |     |       |      |     | 100   | 97           |
| S10    | 24   | 16       | Opx        | 57.41 |       | 1.99  | 5.71  |      | 34.18 | 0.44  |      |       |      |     |       |    |      | 0.27  |     |      |      |     |      |     |       |      |     | 100   | 113          |
| S10    | 24   | 17       | Ol         | 42.18 |       |       | 8.03  |      | 49.46 |       |      |       |      |     |       |    |      |       |     | 0.32 |      |     |      |     |       |      |     | 100   | 108          |
| S10    | 24.1 | 1        | Ttn        | 32.72 | 37.65 | 0.62  | 0.47  |      |       | 27.77 |      |       |      |     |       |    | 0.77 |       |     |      |      |     |      |     |       |      |     | 100   | 112          |
| S10    | 24.1 | 2        | Mix        | 55.39 | 0.34  | 8.65  | 8.23  |      | 24.19 | 1.46  | 1.32 | 0.42  |      |     |       |    |      |       |     |      |      |     |      |     |       |      |     | 100   | 97           |

Table B5.2: EDS analyses from sample 10.

| Sample | Site | Position | Mineral                                     | SiO2   | TiO2  | Al2O3 | FeO   | MnO  | MgO   | CaO   | Na2O | K2O   | P2O5 | SO3   | F     | Cl | V2O5 | Cr2O3 | CoO | NiO  | ZnO  | SrO | ZrO2 | BaO | Yb2O3 | HfO2 | WO3 | Total | Actual Total |
|--------|------|----------|---------------------------------------------|--------|-------|-------|-------|------|-------|-------|------|-------|------|-------|-------|----|------|-------|-----|------|------|-----|------|-----|-------|------|-----|-------|--------------|
| S10    | 24.1 | 3        | Ilm                                         |        | 50.62 |       | 46.38 | 2.32 |       | 0.68  |      |       |      |       |       |    |      |       |     |      |      |     |      |     |       |      |     | 100   | 96           |
| S10    | 25   | 1        | Chr                                         |        |       | 7.70  | 21.60 |      | 8.63  |       |      |       |      |       |       |    |      | 62.08 |     |      |      |     |      |     |       |      |     | 100   | 119          |
| S10    | 25   | 2        | Chr                                         |        |       | 15.90 | 24.92 |      | 10.03 |       |      |       |      |       |       |    |      | 49.15 |     |      |      |     |      |     |       |      |     | 100   | 115          |
| S10    | 25   | 3        | Chr                                         |        |       | 11.27 | 25.09 |      | 8.47  |       |      |       |      |       |       |    |      | 55.16 |     |      |      |     |      |     |       |      |     | 100   | 118          |
| S10    | 25   | 4        | Py                                          | 0.11   |       |       | 28.91 |      |       |       |      |       |      | 70.98 |       |    |      |       |     |      |      |     |      |     |       |      |     | 100   | 115          |
| S10    | 25   | 5        | Spl                                         |        |       | 32.33 | 19.93 |      | 13.11 |       |      |       |      |       |       |    | 0.36 | 33.76 |     |      | 0.51 |     |      |     |       |      |     | 100   | 112          |
| S10    | 25   | 6        | Ol                                          | 41.90  |       |       | 8.08  |      | 49.72 |       |      |       |      |       |       |    |      |       |     | 0.29 |      |     |      |     |       |      |     | 100   | 100          |
| S10    | 25   | 7        | Ms                                          | 51.37  | 0.46  | 23.58 | 5.97  |      | 2.75  |       |      | 10.88 |      |       |       |    |      |       |     |      |      |     |      |     |       |      |     | 95    | 98           |
| S10    | 25   | 8        | Cpx                                         | 49.35  | 3.20  | 5.14  | 8.77  | 0.24 | 12.35 | 20.17 | 0.78 |       |      |       |       |    |      |       |     |      |      |     |      |     |       |      |     | 100   | 101          |
| S10    | 25   | 9        | Ol                                          | 41.93  |       |       | 8.45  |      | 49.23 |       |      |       |      |       |       |    |      |       |     | 0.39 |      |     |      |     |       |      |     | 100   | 117          |
| S10    | 25   | 10       | Ol                                          | 42.04  |       |       | 7.28  |      | 50.29 |       |      |       |      |       |       |    |      |       |     | 0.39 |      |     |      |     |       |      |     | 100   | 120          |
| S10    | 25   | 11       | Amph +                                      | 51.05  | 2.30  | 12.57 | 9.36  |      | 7.62  | 12.78 | 3.10 |       | 1.22 |       |       |    |      |       |     |      |      |     |      |     |       |      |     | 100   | 107          |
| S10    | 25   | 12       | Dol                                         |        |       |       |       |      | 22.40 | 31.60 |      |       |      |       |       |    |      |       |     |      |      |     |      |     |       |      |     | 54    | 121          |
| S10    | 25   | 13       | Ol                                          | 42.26  |       |       | 7.46  |      | 50.01 |       |      |       |      |       |       |    |      |       |     | 0.27 |      |     |      |     |       |      |     | 100   | 106          |
| S10    | 25   | 14       | Amph                                        | 50.51  |       | 7.76  | 3.01  |      | 20.43 | 11.74 | 1.85 | 0.15  |      |       |       |    |      | 1.56  |     |      |      |     |      |     |       |      |     | 97    | 117          |
| S10    | 25   | 15       | Ads                                         | 55.34  | 1.65  | 12.51 | 9.96  | 0.24 | 6.65  | 8.76  | 4.88 |       |      |       |       |    |      |       |     |      |      |     |      |     |       |      |     | 100   | 118          |
| S10    | 25   | 16       | Chl                                         | 27.36  |       | 16.74 | 27.96 | 1.05 | 11.89 |       |      |       |      |       |       |    |      |       |     |      |      |     |      |     |       |      |     | 85    | 110          |
| S10    | 25   | 17       | Fl                                          |        |       |       |       |      |       | 51.53 |      |       |      |       | 48.47 |    |      |       |     |      |      |     |      |     |       |      |     | 100   | 122          |
| S10    | 25   | 18       | Ol                                          | 41.76  |       |       | 7.82  |      | 50.05 |       |      |       |      |       |       |    |      |       |     | 0.37 |      |     |      |     |       |      |     | 100   | 120          |
| S10    | 26   | 1        | Qz                                          | 100.00 |       |       |       |      |       |       |      |       |      |       |       |    |      |       |     |      |      |     |      |     |       |      |     | 100   | 56           |
| S10    | 26   | 2        | Amph                                        | 47.94  | 0.48  | 5.83  | 12.13 | 0.44 | 16.40 | 13.47 | 0.32 |       |      |       |       |    |      |       |     |      |      |     |      |     |       |      |     | 97    | 123          |
| S10    | 26   | 3        | Ti-Mag                                      | 0.61   | 17.27 | 3.54  | 75.45 | 0.92 | 0.95  |       |      |       |      |       |       |    | 1.25 |       |     |      |      |     |      |     |       |      |     | 100   | 118          |
| S10    | 26   | 4        | Amph                                        | 46.49  | 2.20  | 9.85  | 12.26 | 0.23 | 12.95 | 10.90 | 2.11 |       |      |       |       |    |      |       |     |      |      |     |      |     |       |      |     | 97    | 120          |
| S10    | 26   | 5        | Cpx                                         | 54.29  | 0.57  | 1.95  | 7.27  |      | 16.87 | 19.05 |      |       |      |       |       |    |      |       |     |      |      |     |      |     |       |      |     | 100   | 57           |
| S10    | 26   | 6        | Amph                                        | 46.55  | 2.09  | 9.12  | 13.89 | 0.26 | 12.56 | 10.65 | 1.88 |       |      |       |       |    |      |       |     |      |      |     |      |     |       |      |     | 97    | 97           |
| S10    | 26   | 7        | Spl                                         |        |       | 34.60 | 17.86 |      | 14.59 |       |      |       |      |       |       |    |      | 32.95 |     |      |      |     |      |     |       |      |     | 100   | 111          |
| S10    | 26   | 8        | Dol                                         |        |       |       |       |      | 22.86 | 31.14 |      |       |      |       |       |    |      |       |     |      |      |     |      |     |       |      |     | 54    | 114          |
| S10    | 26   | 9        | Ol                                          | 42.08  |       |       | 8.25  |      | 49.28 |       |      |       |      |       |       |    |      |       |     | 0.39 |      |     |      |     |       |      |     | 100   | 114          |
| S10    | 26   | 10       | Ti-Mag                                      | 1.09   | 18.27 | 4.03  | 71.43 | 0.52 | 3.72  |       |      |       |      |       |       |    | 0.95 |       |     |      |      |     |      |     |       |      |     | 100   | 99           |
| S10    | 26   | 11       | Opx                                         | 56.43  |       | 3.36  | 5.67  |      | 33.39 | 0.51  |      |       |      |       |       |    |      | 0.64  |     |      |      |     |      |     |       |      |     | 100   | 115          |
| S10    | 26   | 12       | Cpx                                         | 49.86  | 3.01  | 5.09  | 6.34  |      | 13.91 | 20.99 | 0.55 |       |      |       |       |    |      | 0.25  |     |      |      |     |      |     |       |      |     | 100   | 119          |
| S10    | 26   | 13       | Act                                         | 55.49  | 0.27  | 3.93  | 2.39  |      | 21.57 | 12.18 | 0.35 |       |      |       |       |    |      | 0.81  |     |      |      |     |      |     |       |      |     | 97    | 96           |
| S10    | 26   | 14       | Pg                                          | 47.72  |       | 37.63 | 0.44  |      |       |       | 7.49 | 0.79  |      |       | 0.94  |    |      |       |     |      |      |     |      |     |       |      |     | 95    | 116          |
| S10    | 26   | 15       | Ol                                          | 41.84  |       |       | 8.99  |      | 48.79 |       |      |       |      |       |       |    |      |       |     | 0.38 |      |     |      |     |       |      |     | 100   | 97           |
| S10    | 26   | 16       | Ol                                          | 42.05  |       |       | 7.04  |      | 50.52 |       |      |       |      |       |       |    |      |       |     | 0.39 |      |     |      |     |       |      |     | 100   | 114          |
| S10    | 26   | 17       | Spl                                         |        |       | 45.32 | 14.25 |      | 17.89 |       |      |       |      |       |       |    |      | 22.55 |     |      |      |     |      |     |       |      |     | 100   | 117          |
| S10    | 26   | 18       | Cpx                                         | 51.12  | 1.79  | 4.29  | 7.74  |      | 14.42 | 19.96 | 0.39 |       |      |       |       |    |      | 0.30  |     |      |      |     |      |     |       |      |     | 100   | 112          |
| S10    | 26   | 19       | Opx                                         | 56.84  |       | 2.63  | 6.04  |      | 33.72 | 0.27  |      |       |      |       |       |    |      | 0.50  |     |      |      |     |      |     |       |      |     | 100   | 112          |
|        |      |          |                                             |        |       |       |       |      |       |       |      |       |      |       |       |    |      |       |     |      |      |     |      |     |       |      |     |       |              |
|        |      | Notes    |                                             |        |       |       |       |      |       |       |      |       |      |       |       |    |      |       |     |      |      |     |      |     |       |      |     |       |              |
|        |      | " "      | = indicates that mineral is altered         |        |       |       |       |      |       |       |      |       |      |       |       |    |      |       |     |      |      |     |      |     |       |      |     |       |              |
|        |      | +        | = indicates that other minerals are present |        |       |       |       |      |       |       |      |       |      |       |       |    |      |       |     |      |      |     |      |     |       |      |     |       |              |
|        |      |          |                                             |        |       |       |       |      |       |       |      |       |      |       |       |    |      |       |     |      |      |     |      |     |       |      |     |       |              |
|        |      |          |                                             |        |       |       |       |      |       |       |      |       |      |       |       |    |      |       |     |      |      |     |      |     |       |      |     |       |              |

B6: SEM-BSE images and EDS  
mineral analyses for sample S11.

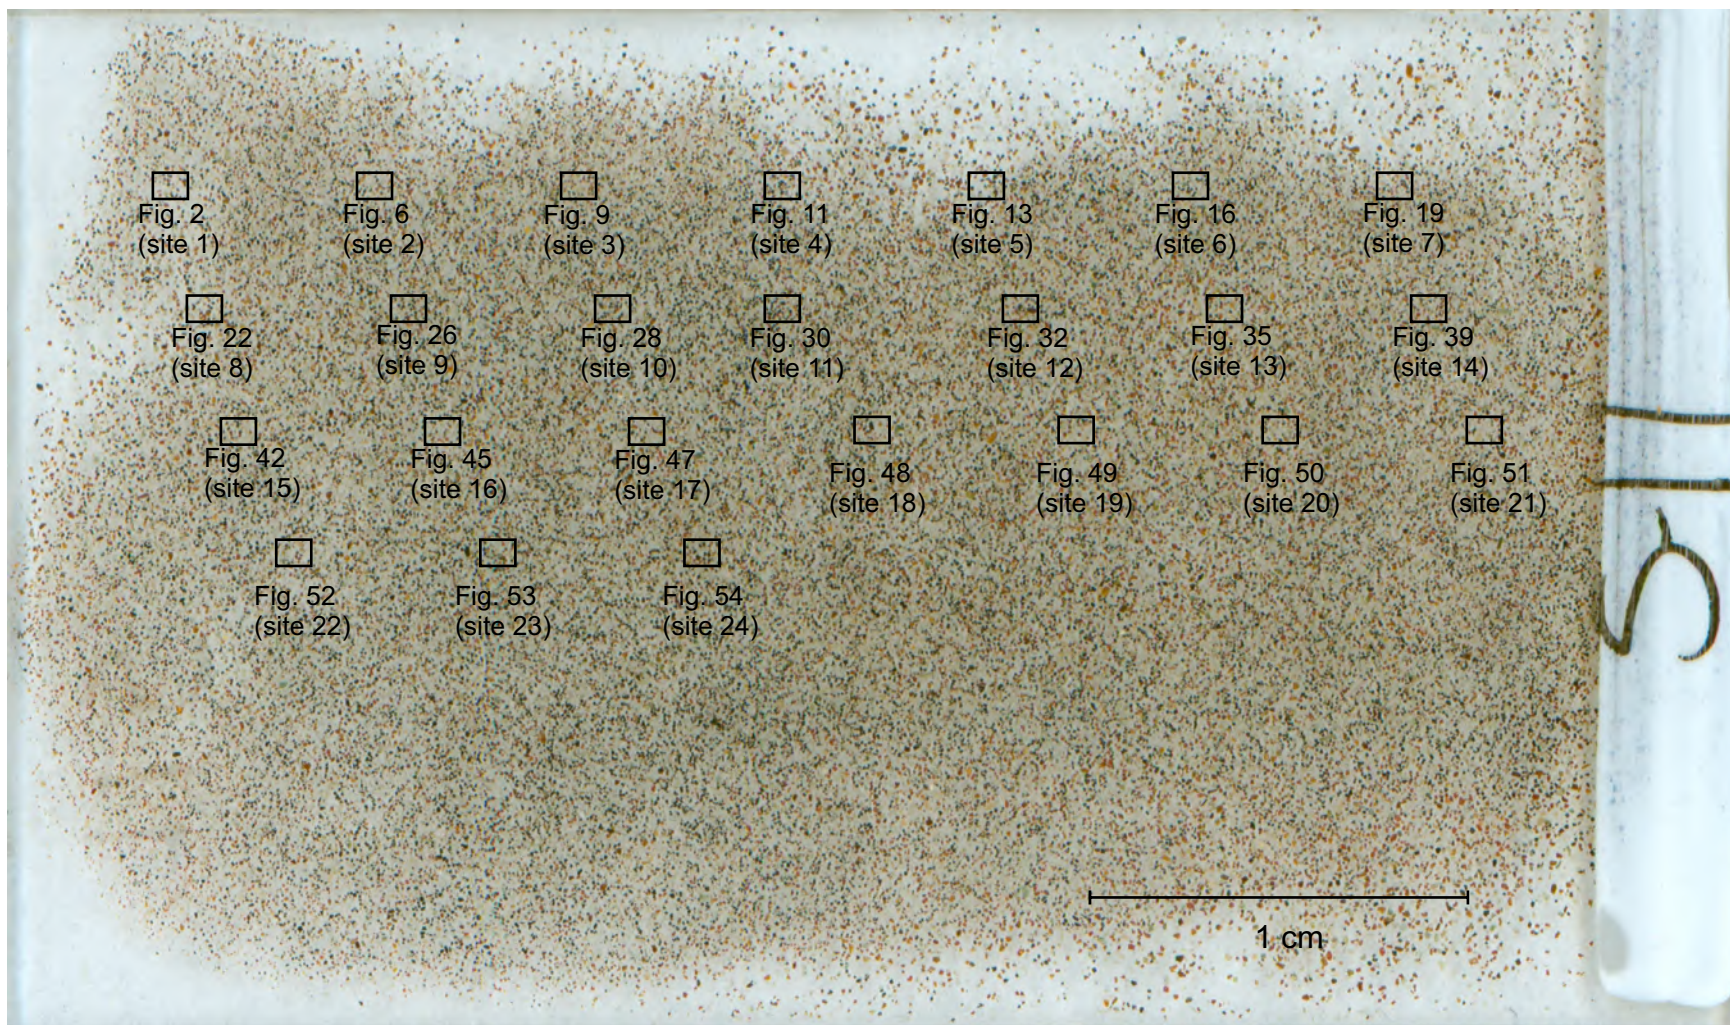

Figure B6.1: Scanned thin section of sample S11 showing the location of analysed sites. This sample comes from a sandy bank ~30cm above the water level from the Lower Louros River. In flood, none rises ~2m.



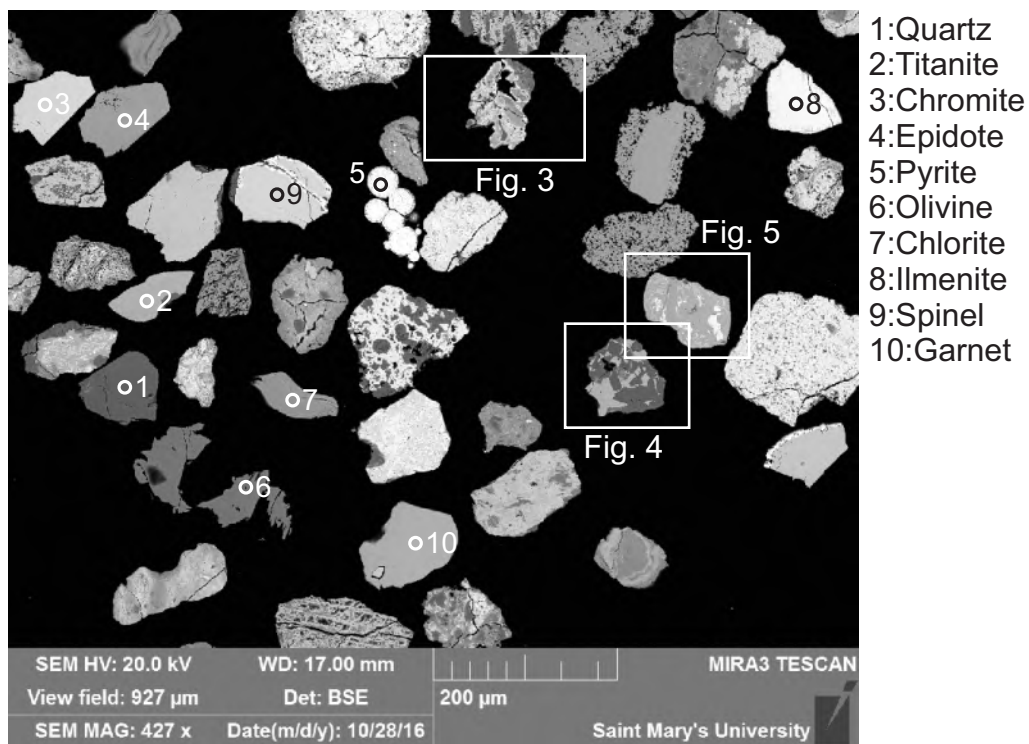

Figure B6.2: Sample S11 site 1 (SEM).

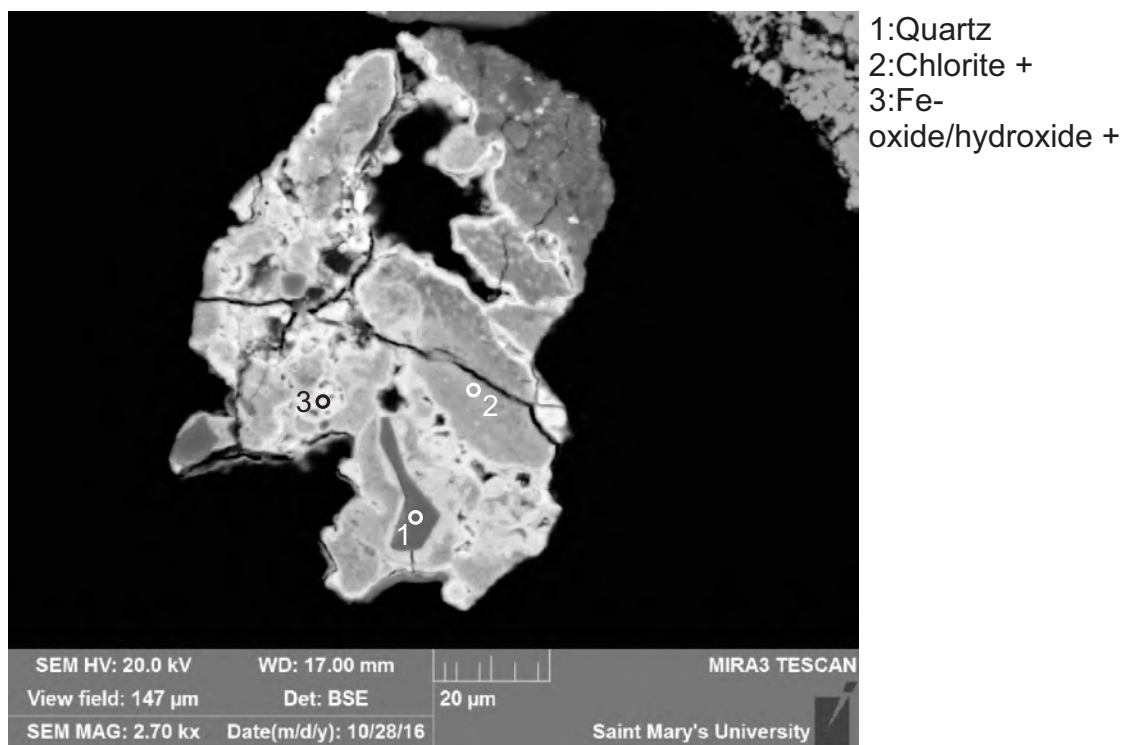

Figure B6.3: Sample S11 site 1.2 (SEM). Lithic clast consisting of quartz + chlorite + Fe-oxide/hydroxide. Probably hydrothermal, possibly pedogenic.



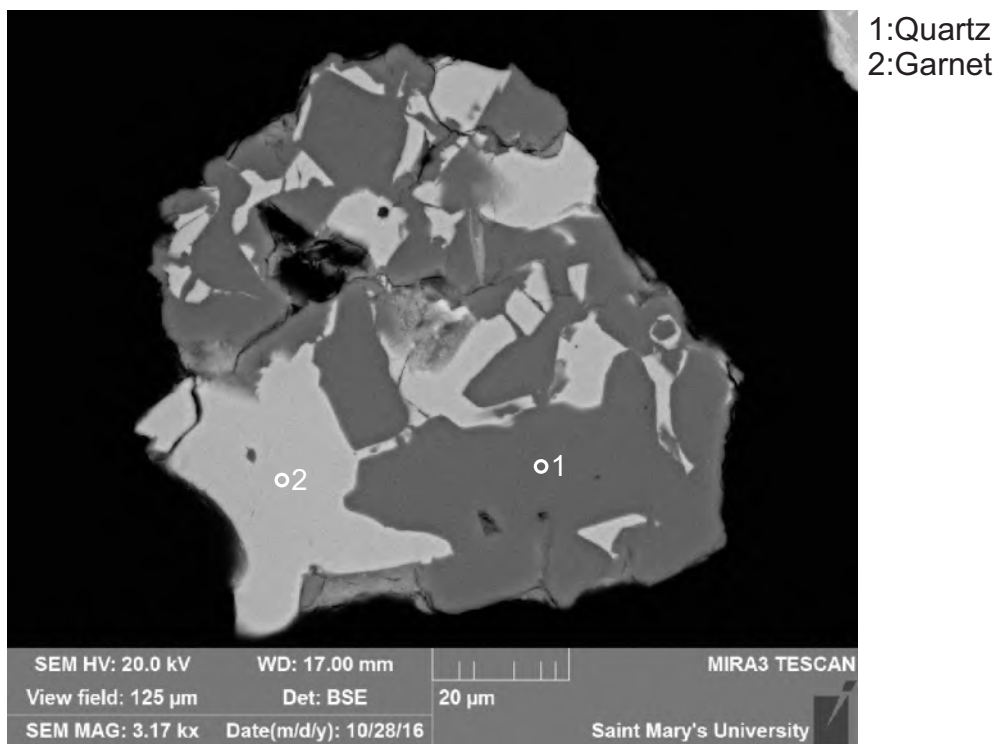

Figure B6.4: Sample S11 site 1.3 (SEM). Lithic clast consisting of garnet + quartz (metamorphic).

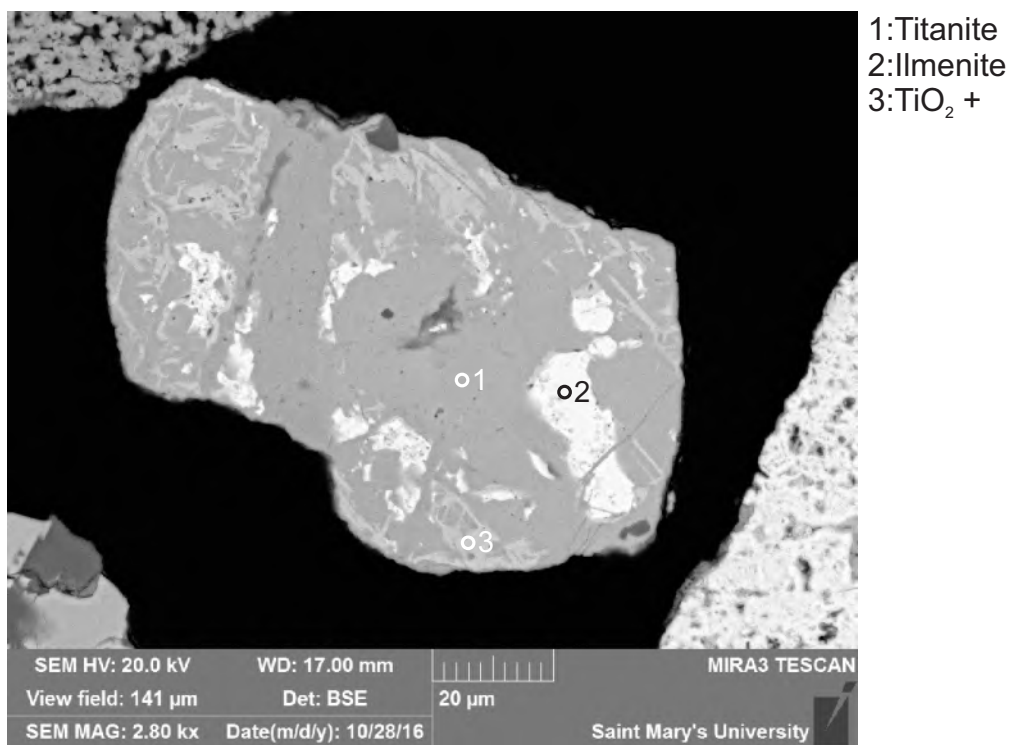

Figure B6.5: Sample S11 site 1.4 (SEM). Lithic clast consisting of titanite + ilmenite + titania. Similar to Fig. B5.43, metamorphic.

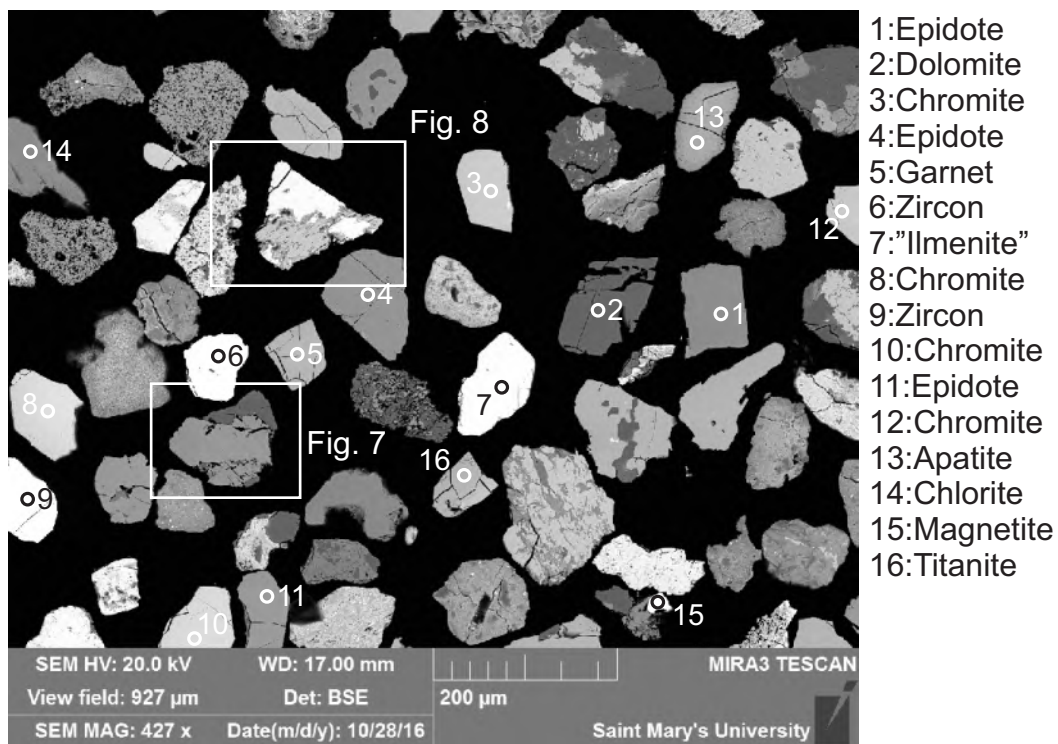

Figure B6.6: Sample S11 site 2 (SEM).

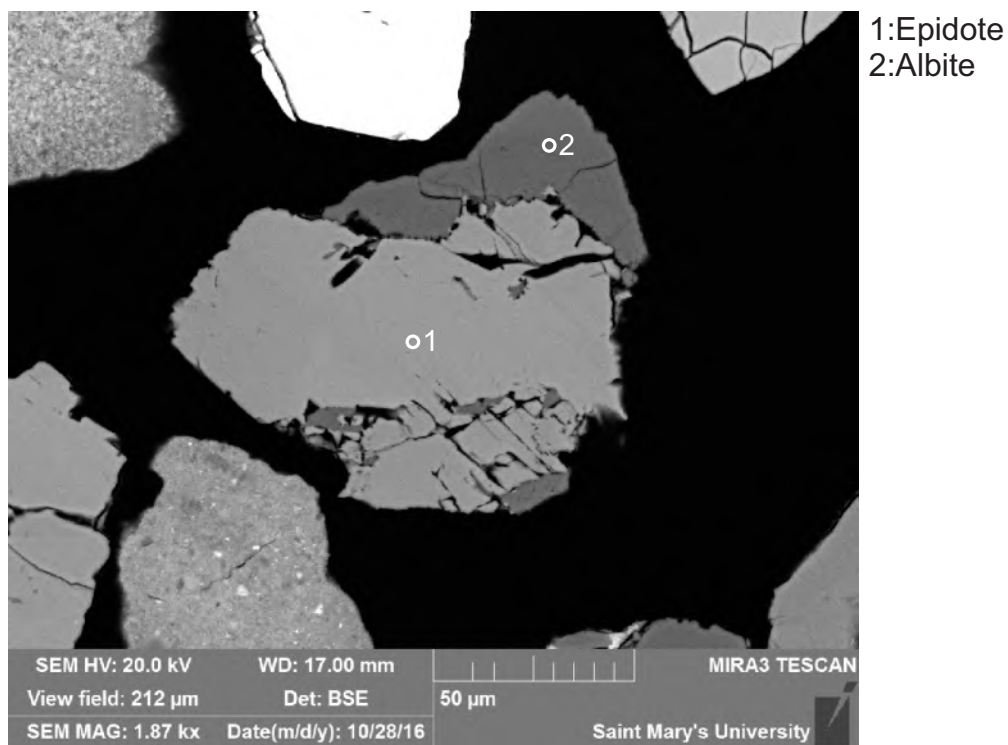

Figure B6.7: Sample S11 site 2.2 (SEM). Lithic clast consisting of epidote + albite, epidote vein.

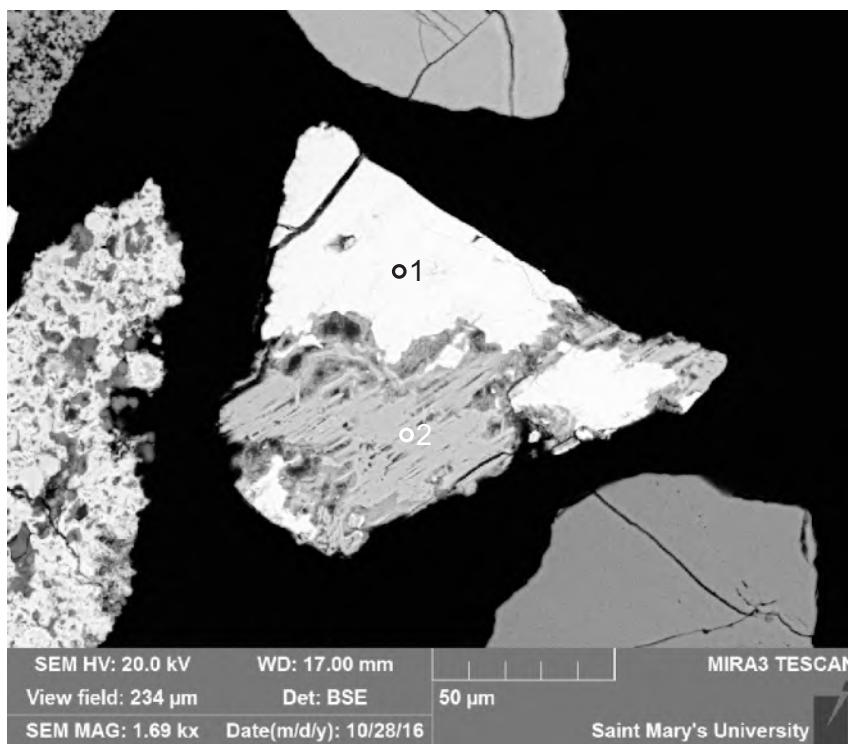

Figure B6.8: Sample S11 site 2.3 (SEM). Partially altered Ilmenite

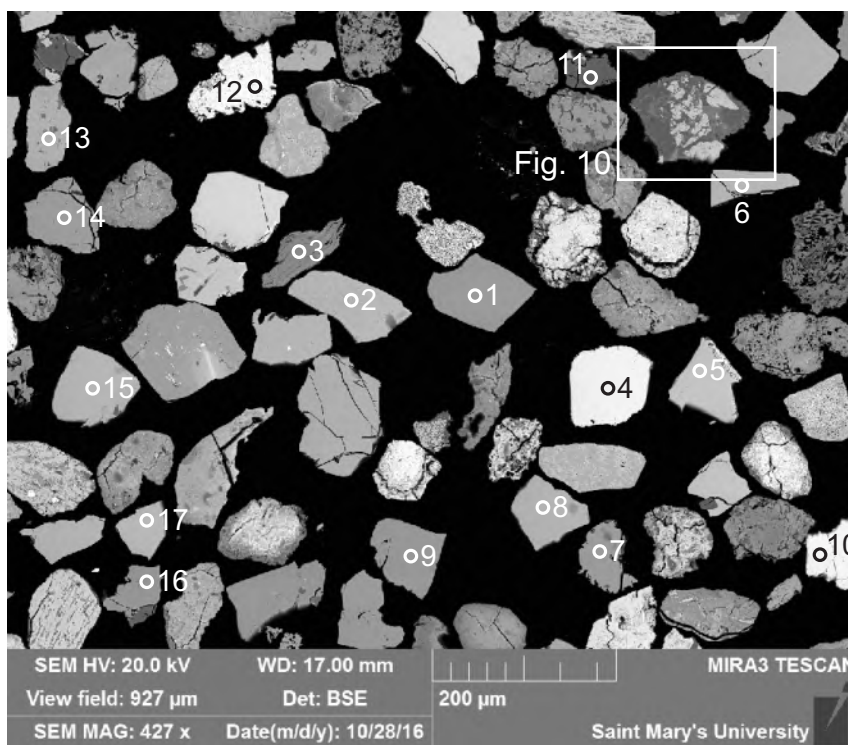

Figure B6.9: Sample S11 site 3 (SEM).

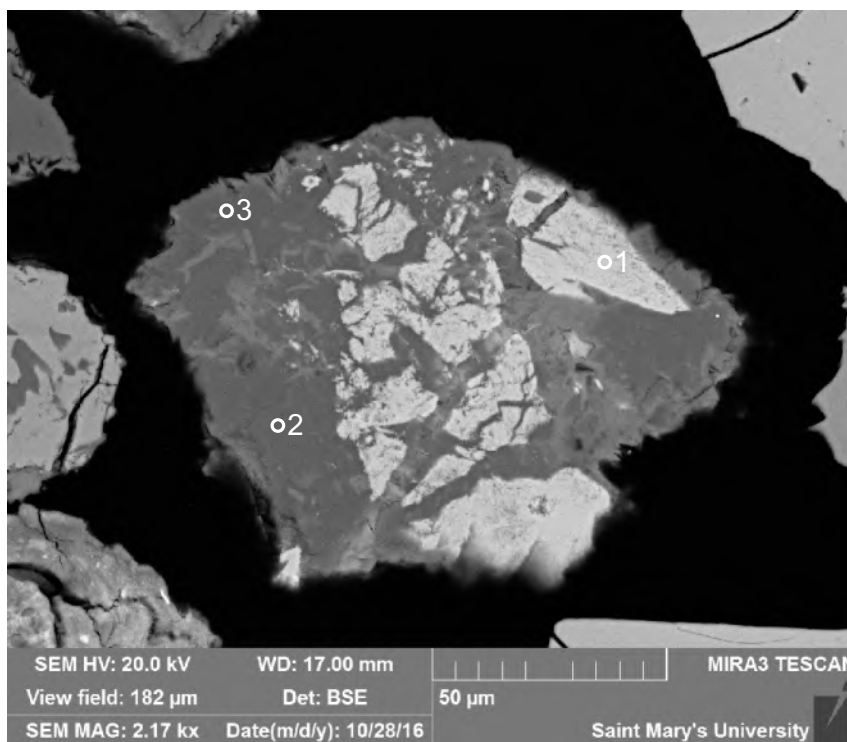

- 1:TiO<sub>2</sub> +
- 2:Quartz
- 3:Quartz

Figure B6.10: Sample S11 site 3.2 (SEM). Lithic clast of quartz + titania, and probably chlorite. Hydrothermal or metamorphic (cf. Fig. B6.12).

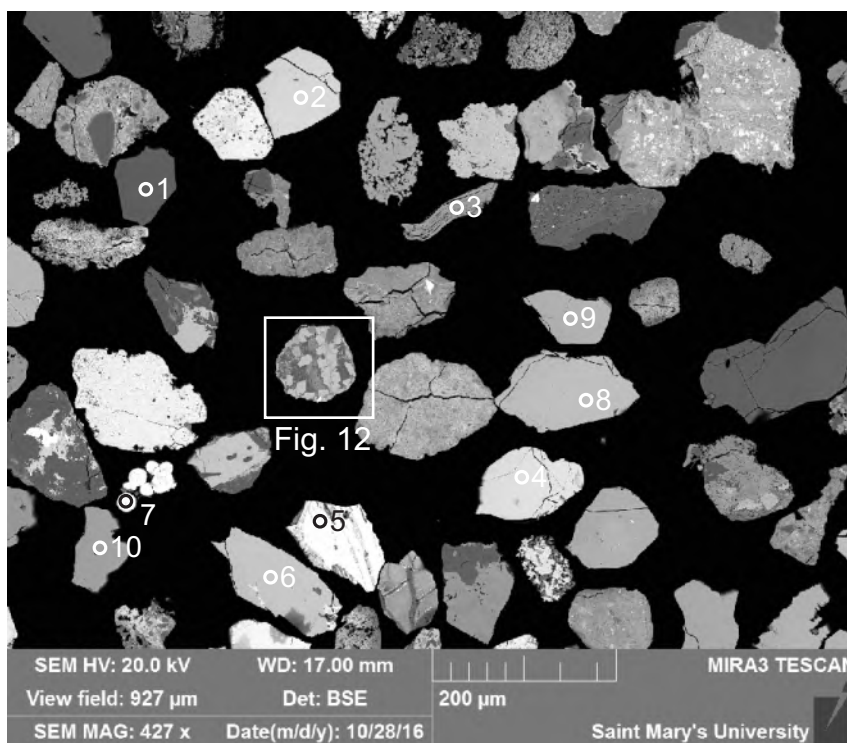

- 1:Tourmaline
- 2:Chromite
- 3:Chlorite
- 4:Chromite
- 5:"Ilmenite"
- 6:TiO<sub>2</sub>
- 7:Pyrite
- 8:Spinel
- 9:Garnet
- 10:Garnet

Figure B6.11: Sample S11 site 4 (SEM).



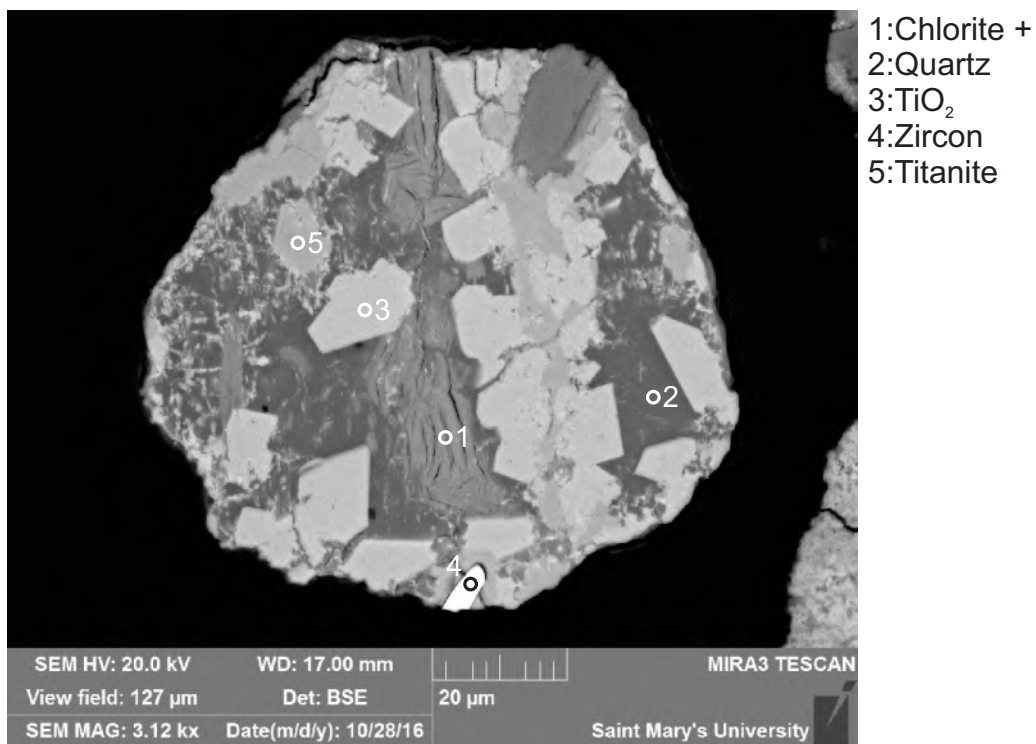

Figure B6.12: Sample S11 site 4.2 (SEM). Lithic clast composed of chlorite + quartz + titanite + titania + zircon (metamorphic).

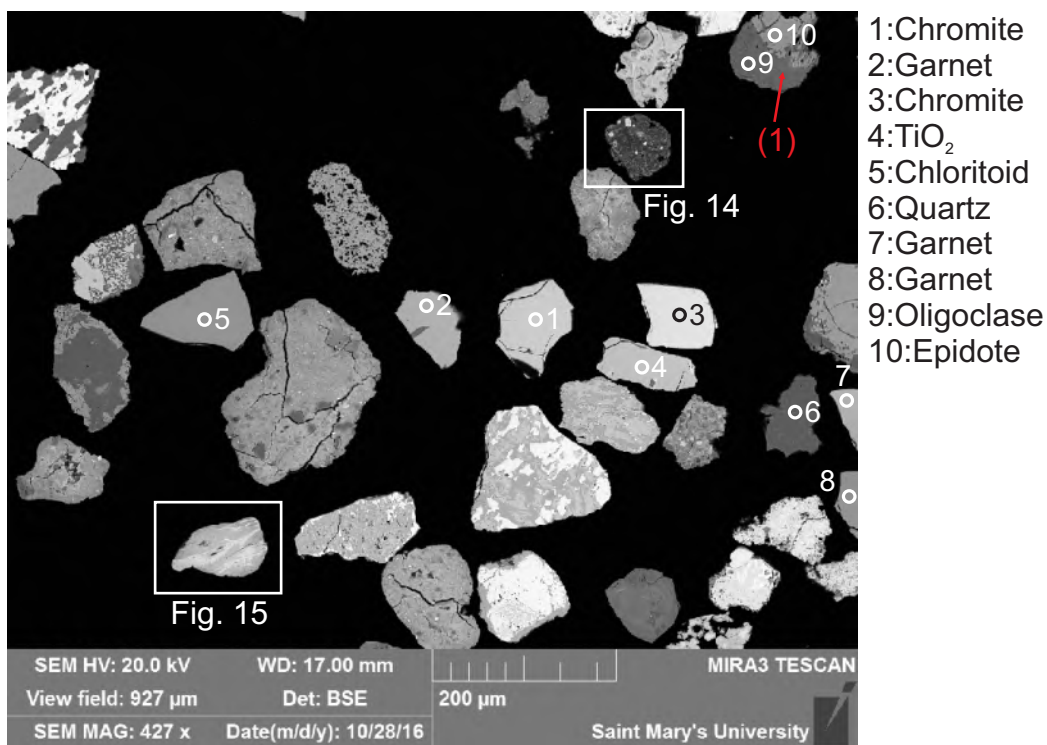

Figure B6.13: Sample S11 site 5 (SEM). 1: Lithic clast (albite + epidote).



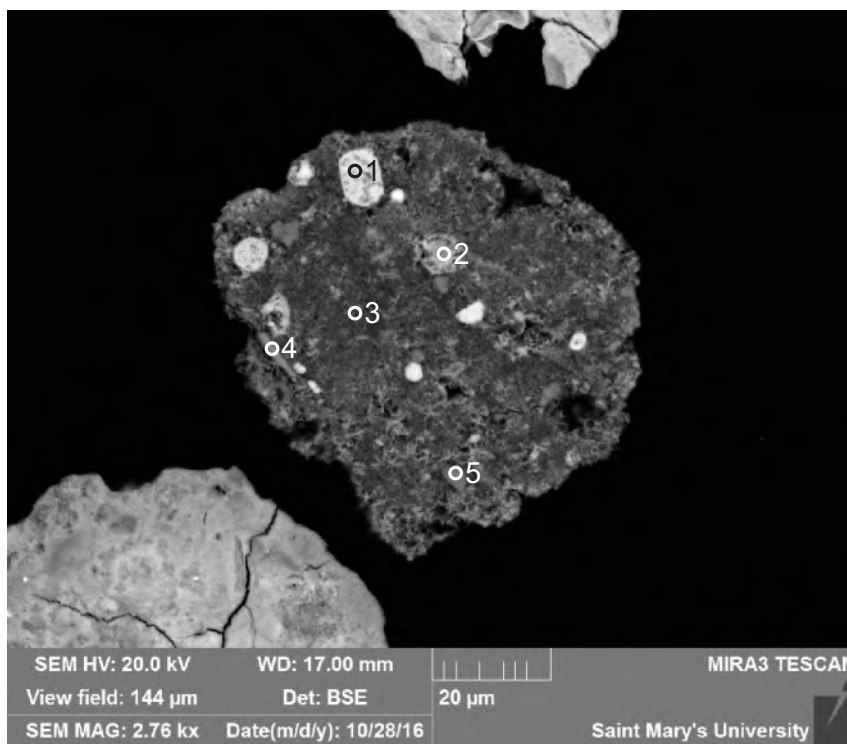

- 1:Fe-oxide/hydroxide +
- 2:Fe-oxide/hydroxide + Apatite
- 3:Apatite +
- 4:Muscovite + Apatite +
- 5:Quartz + Apatite

Figure B6.14: Sample S11 site 5.2 (SEM). Lithic clast of apatite + quartz + muscovite + Fe-oxide/hydroxide. Phosphate siltstone. "Apatite" is probably francolite.

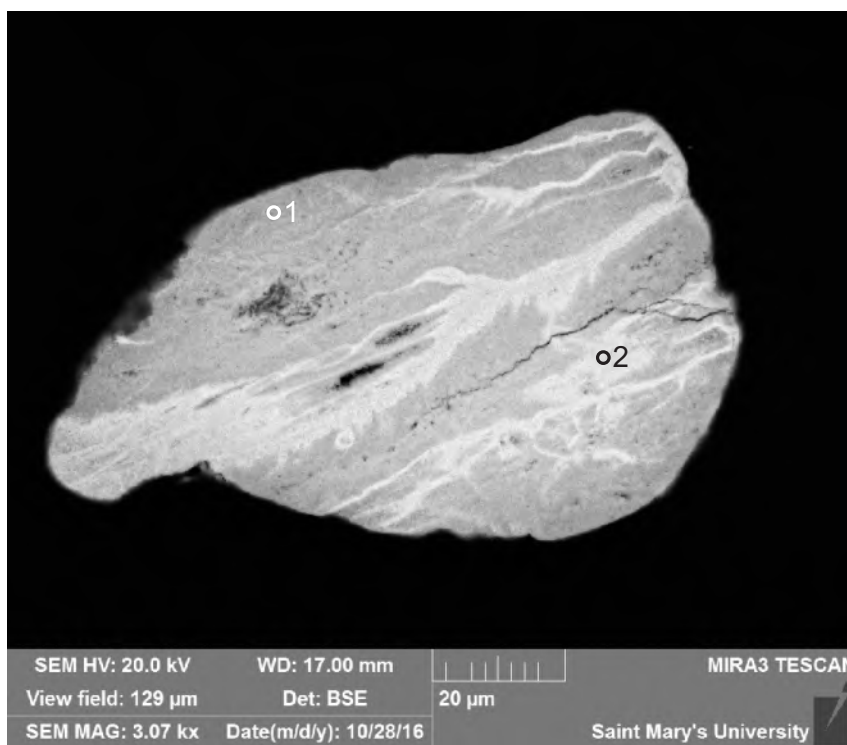

- 1:Siderite
- 2:"Magnetite" +

Figure B6.15: Sample S11 site 5.3 (SEM). ?Foliated lithic clast of siderite + magnetite (hydrothermal).

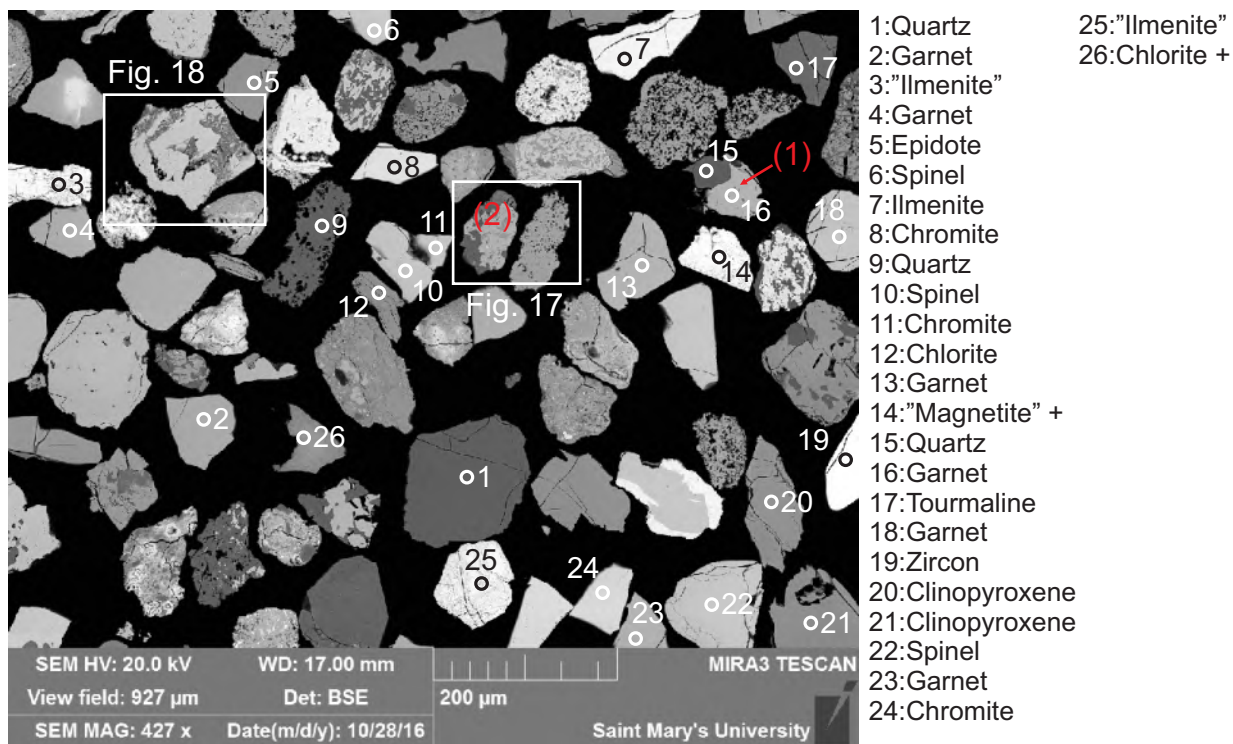

Figure B6.16: Sample S11 site 6 (SEM). 1: Lithic clast (quartz + garnet, metamorphic).

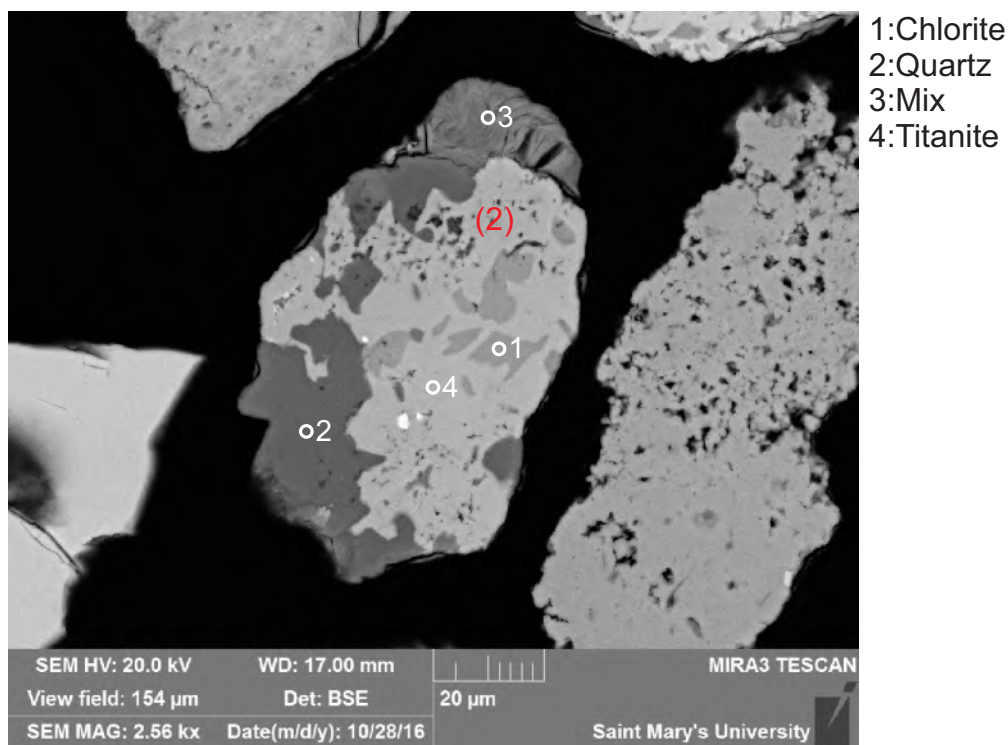

Figure B6.17: Sample S11 site 6.2 (SEM). Lithic clast consisting of chlorite + quartz + titanite. Metamorphic (cf. Fig. B6.12).

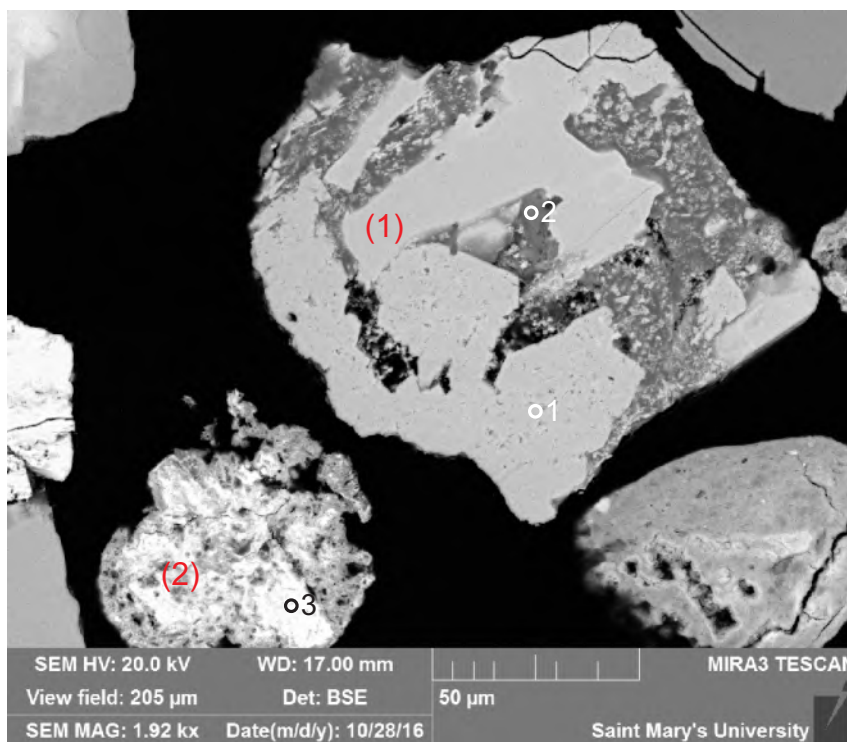

- 1:TiO<sub>2</sub>
- 2:Muscovite +
- 3:"Magnetite" +

Figure B6.18: Sample S11 site 6.3 (SEM). 1: Lithic clast composed of titania + muscovite (metamorphic, muscovite schist with rutile porphyroblasts). 2: Lithic clast of quartz + magnetite (cf. Fig. B3.54).

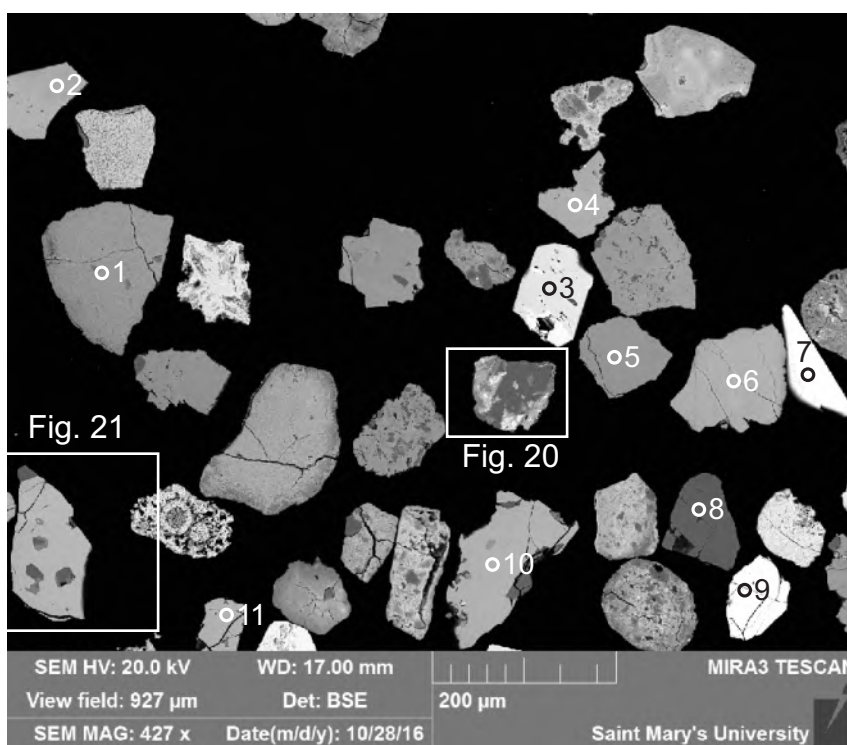

- 1:Apatite +
- 2:Garnet
- 3:Chromite
- 4:Garnet
- 5:Epidote
- 6:Apatite
- 7:Fe-oxide/hydroxide
- 8:Dolomite
- 9:"Chromite"
- 10:Garnet
- 11:Garnet

Figure B6.19: Sample S11 site 7 (SEM).

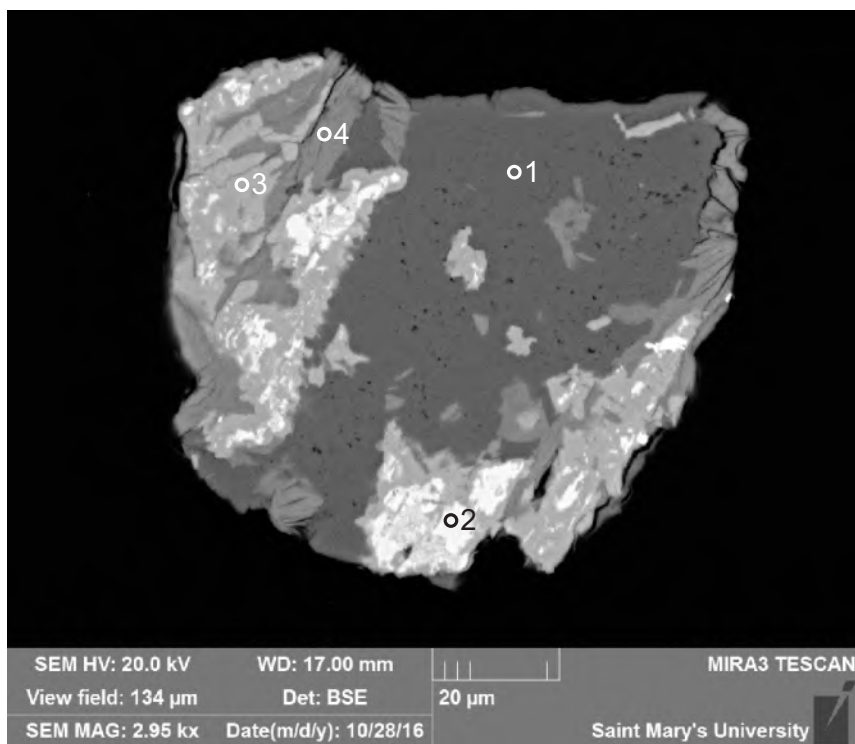

- 1:Albite
- 2:Ilmenite
- 3:Titanite
- 4:Chlorite

Figure B6.20: Sample S11 site 7.2 (SEM). Lithic clast consisting of albite + ilmenite + titanite + chlorite (metamorphic), cf. B5.43, B3.29.

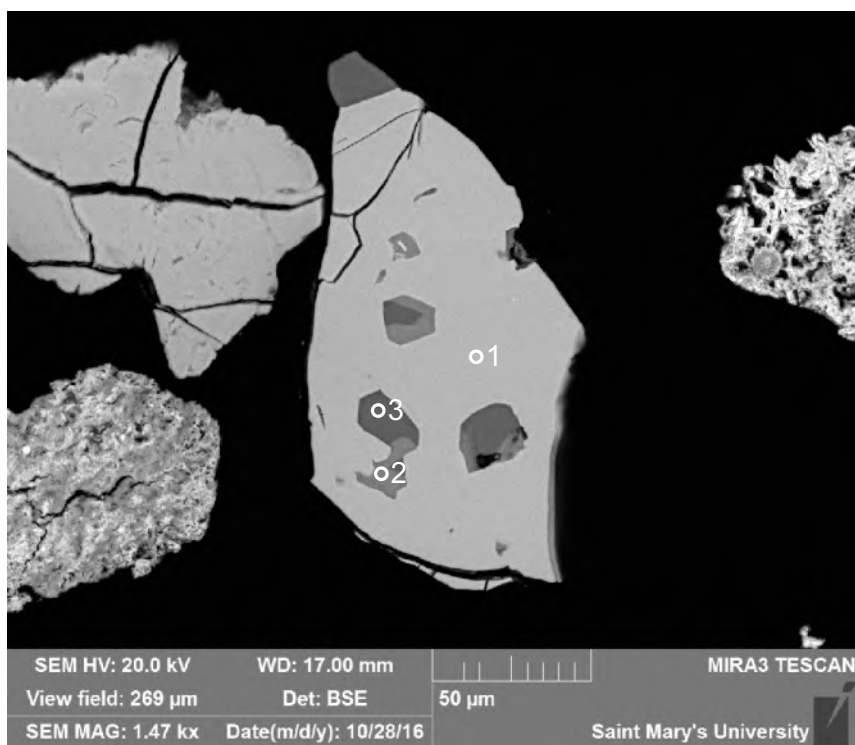

- 1:Garnet
- 2:Chlorite
- 3:Quartz

Figure B6.21: Sample S11 site 7.3 (SEM). Lithic clast consisting of garnet with inclusions of quartz + chlorite. Metamorphic.



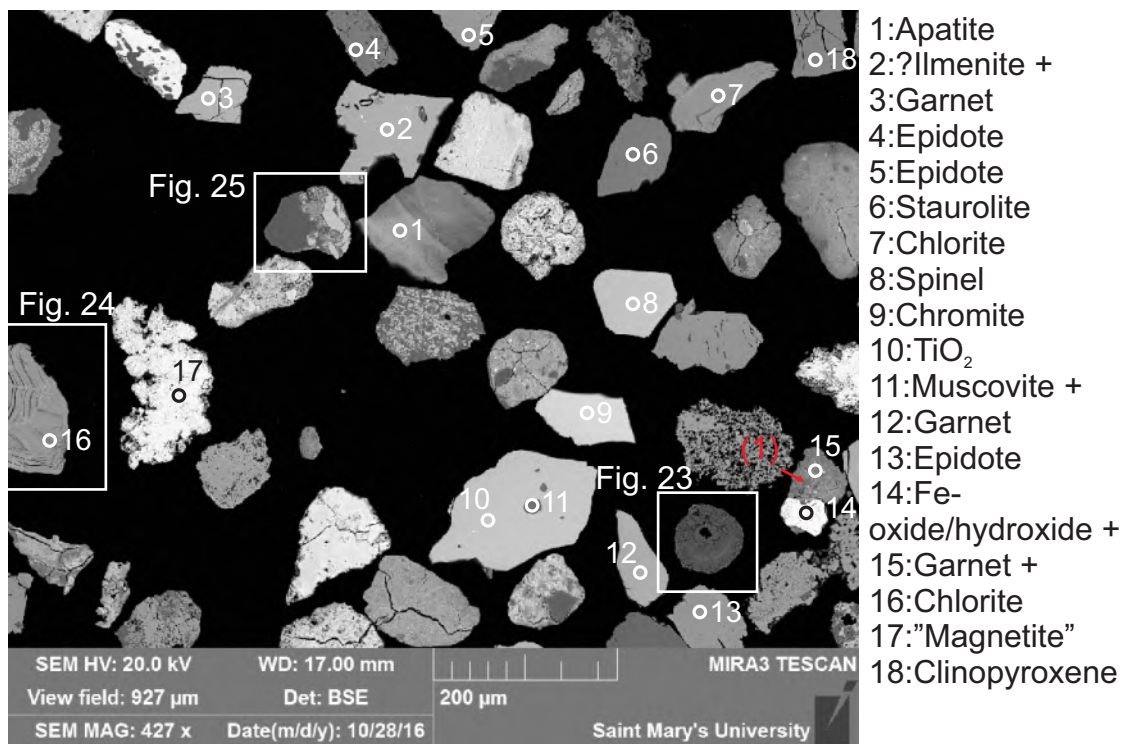

Figure B6.22: Sample S11 site 8 (SEM). Lithic clast consisting of garnet + Fe-oxide/hydroxide.

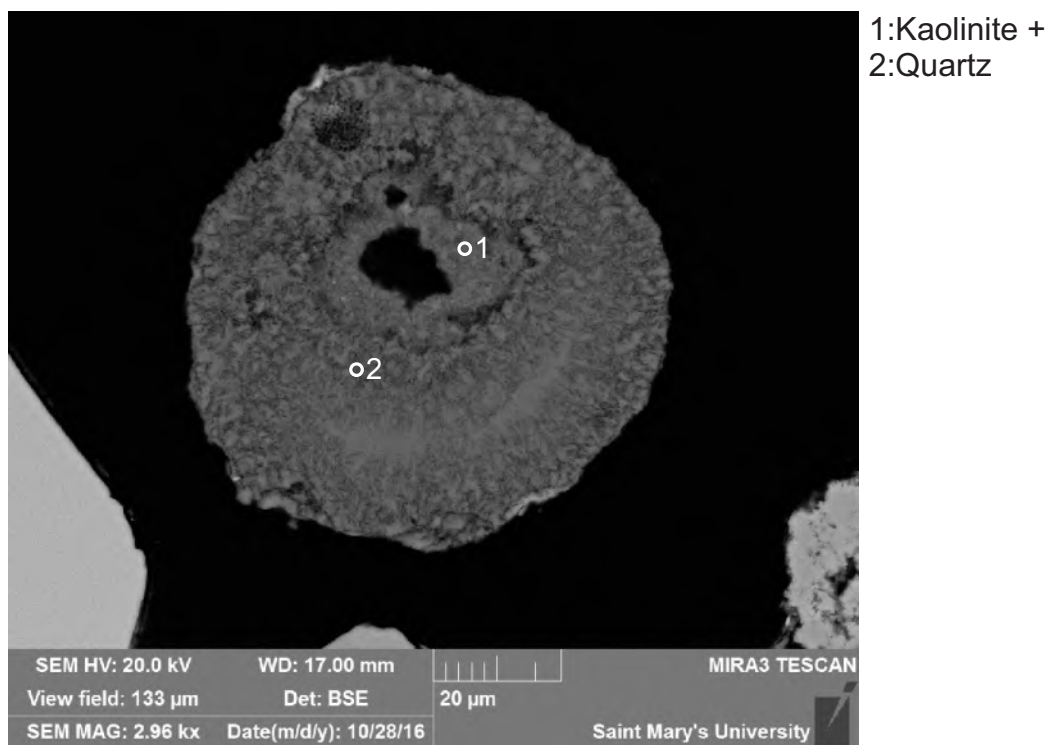

Figure B6.23: Sample S11 site 8.2 (SEM). Pedogenetic clast.

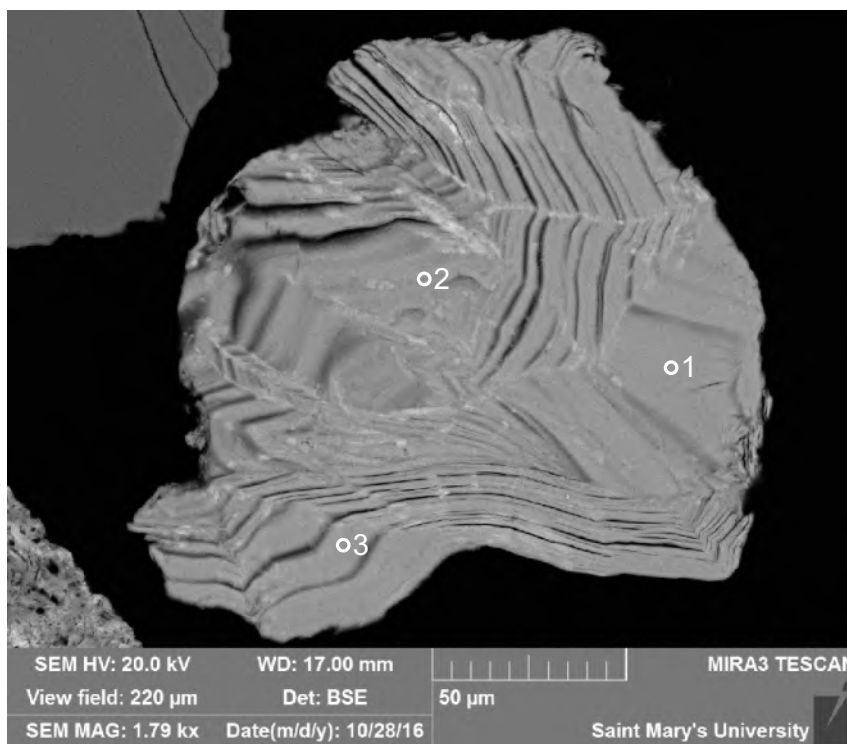

- 1:Chlorite
- 2:Chlorite
- 3:Chlorite

Figure B6.24: Sample S11 site 8.3 (SEM). Deformed chlorite clast (chlorite schist).

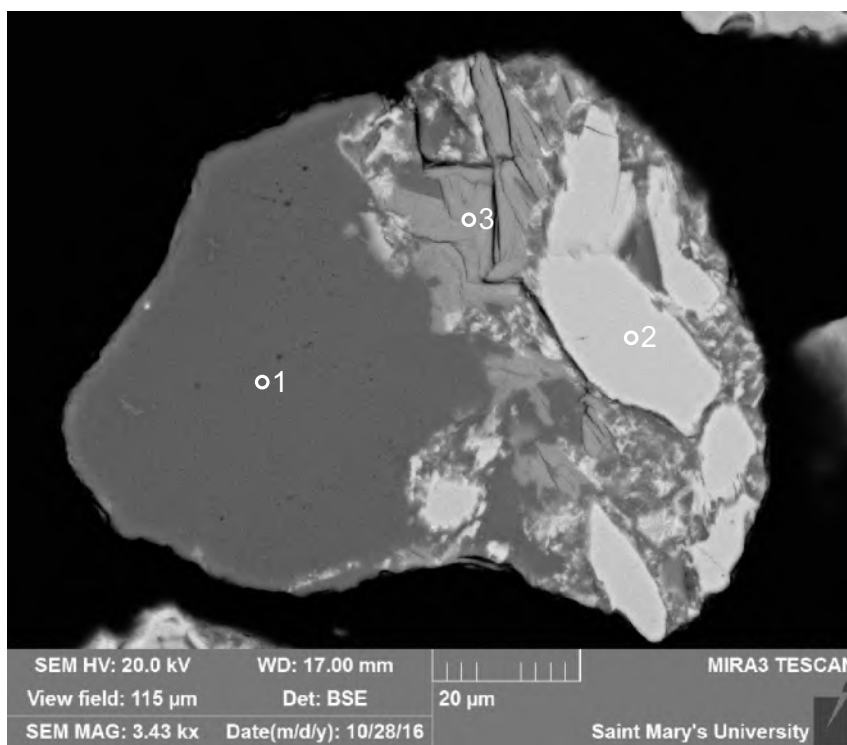

- 1:Quartz
- 2:TiO<sub>2</sub>
- 3:Garnet

Figure B6.25: Sample S11 site 8.4 (SEM). Lithic clast consisting of quartz + garnet + titania (metamorphic).

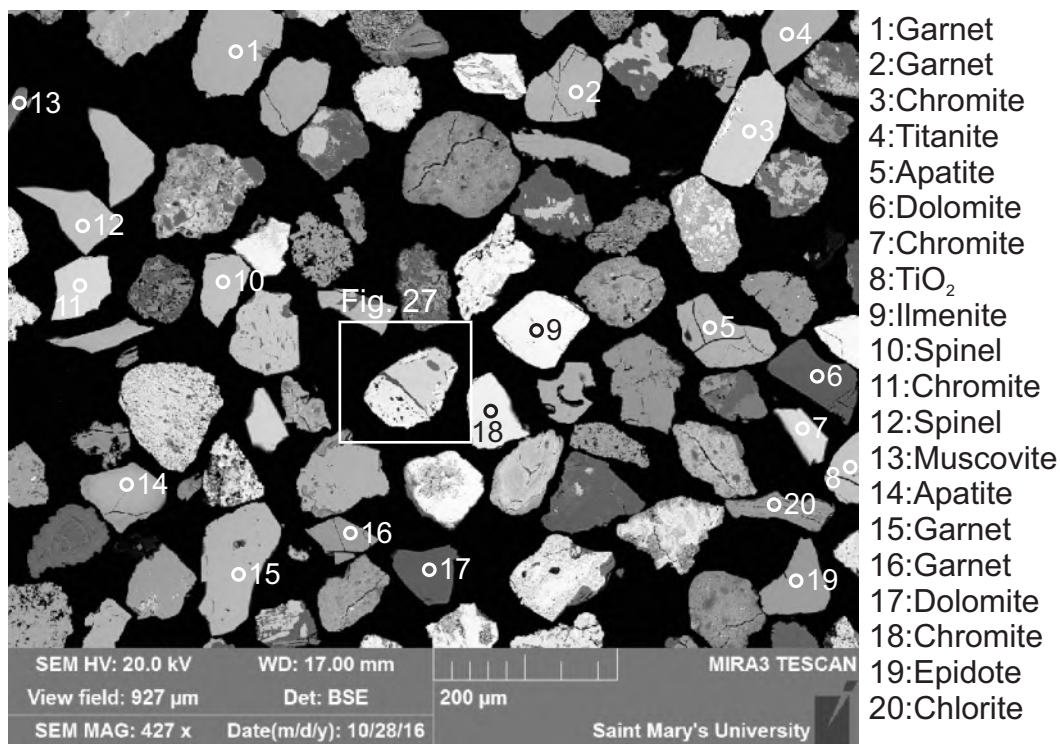

Figure B6.26: Sample S11 site 9 (SEM).

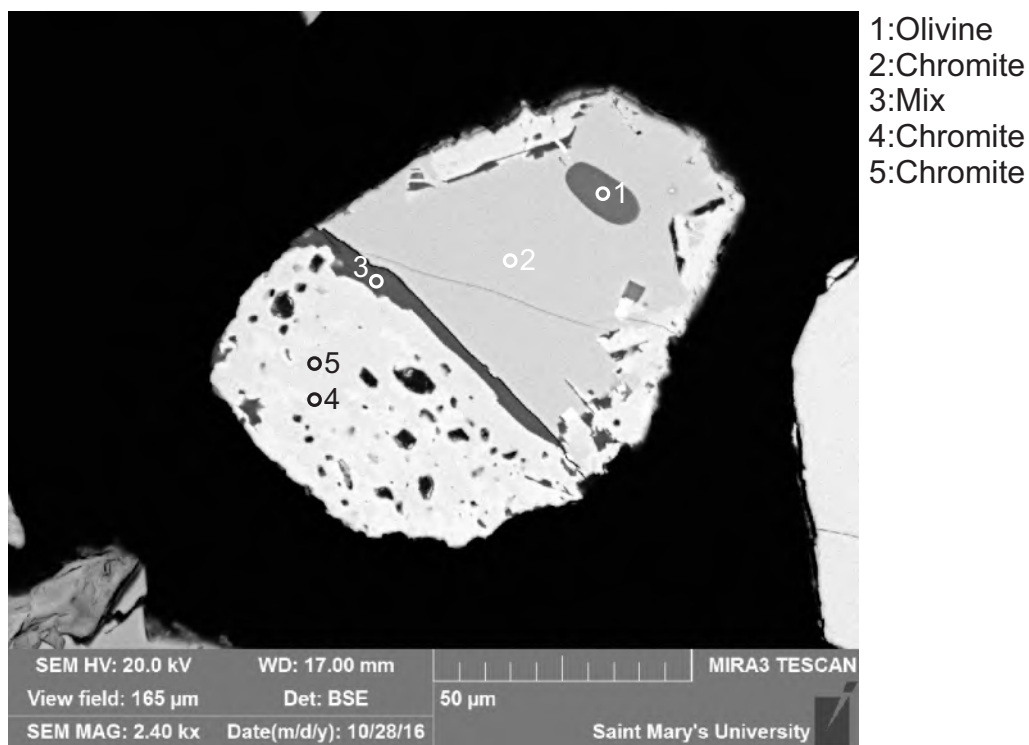

Figure B6.27: Sample S11 site 9.2 (SEM). Lithic clast consisting of chromite with olivine inclusions. Ophiolite.

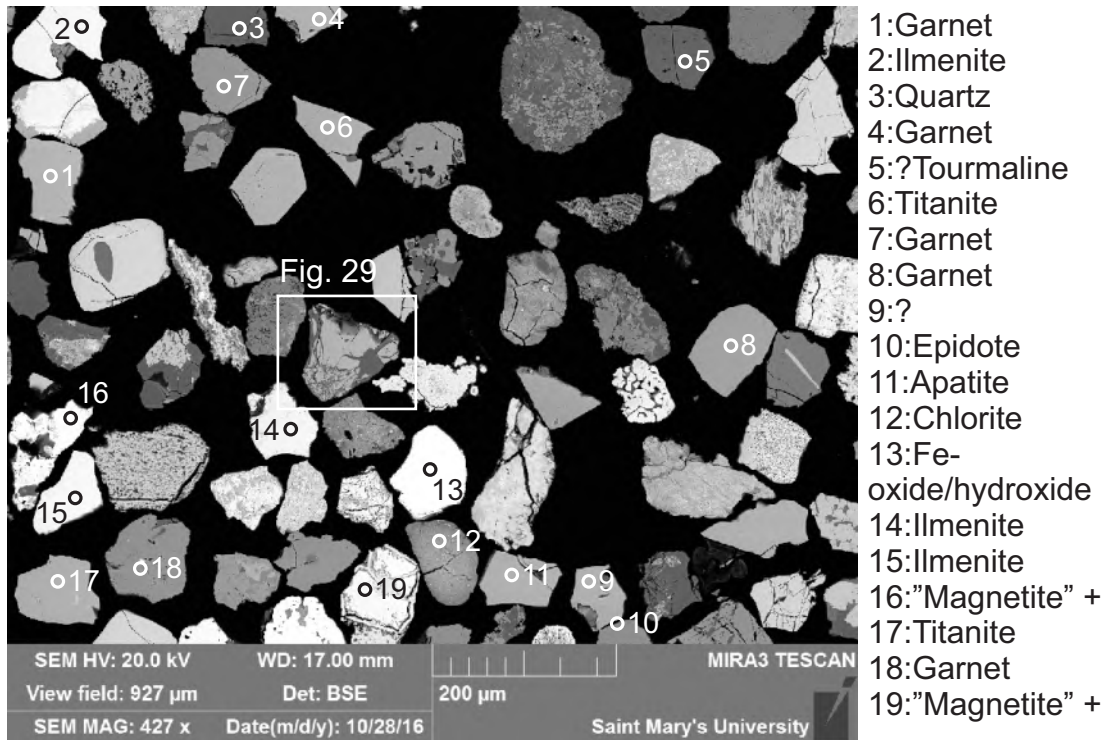

Figure B6.28: Sample S11 site 10 (SEM).

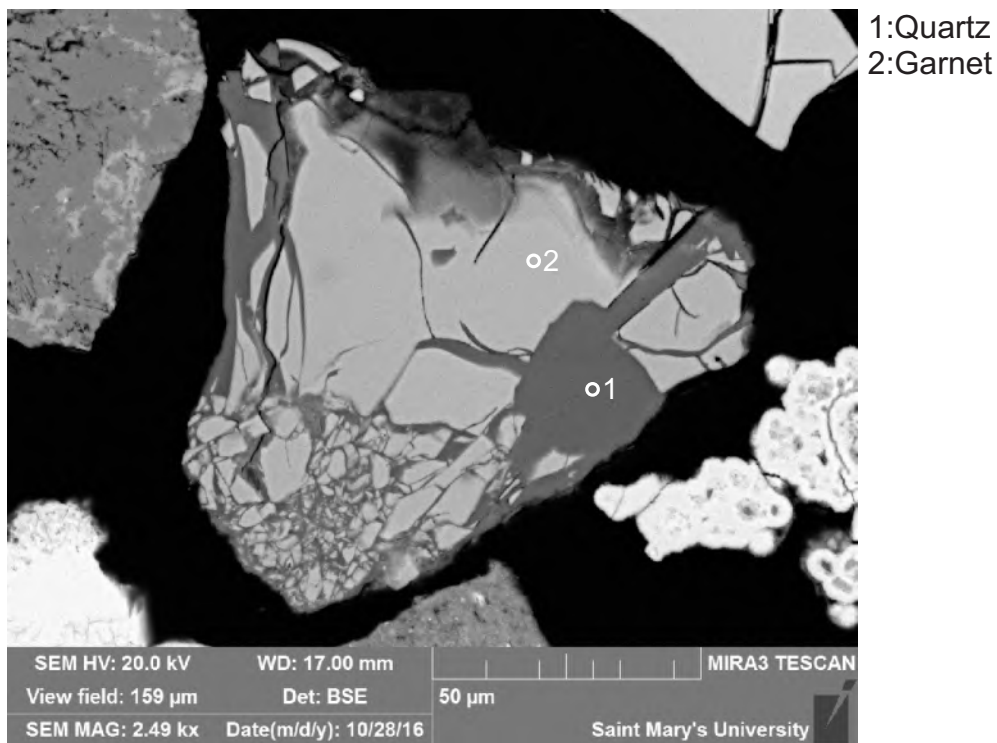

Figure B6.29: Sample S11 site 10.2 (SEM). Lithic clast of quartz + garnet (metamorphic).



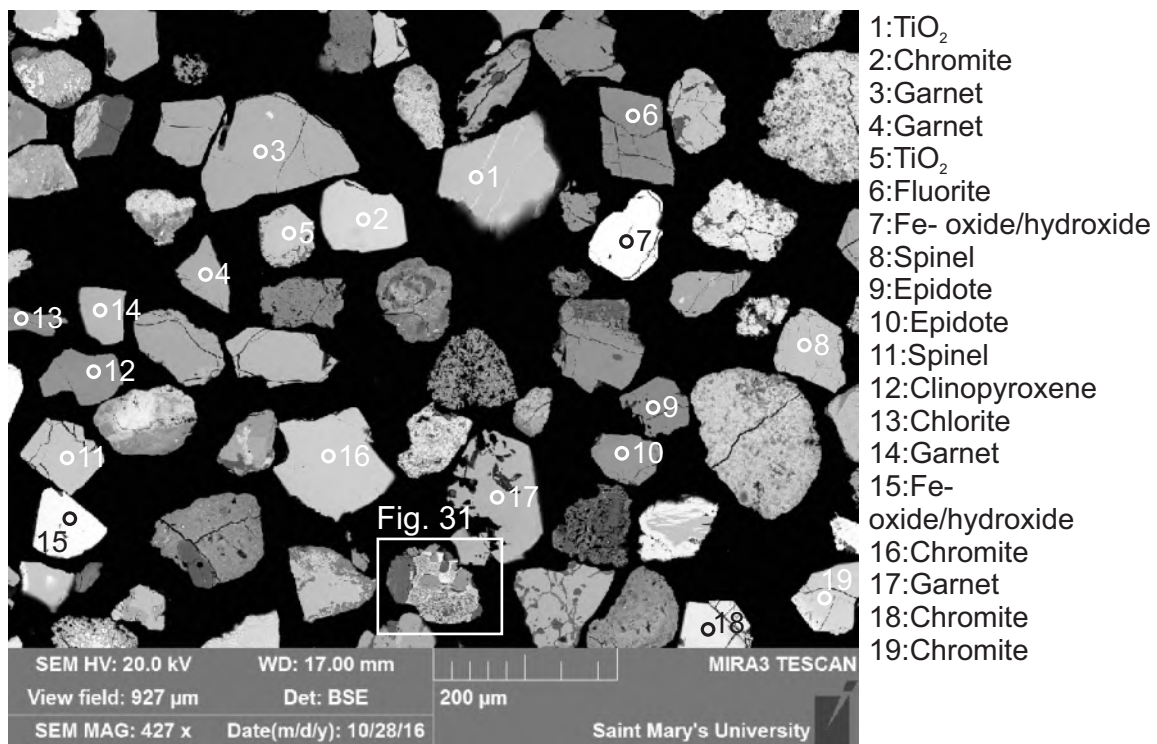

Figure B6.30: Sample S11 site 11 (SEM).

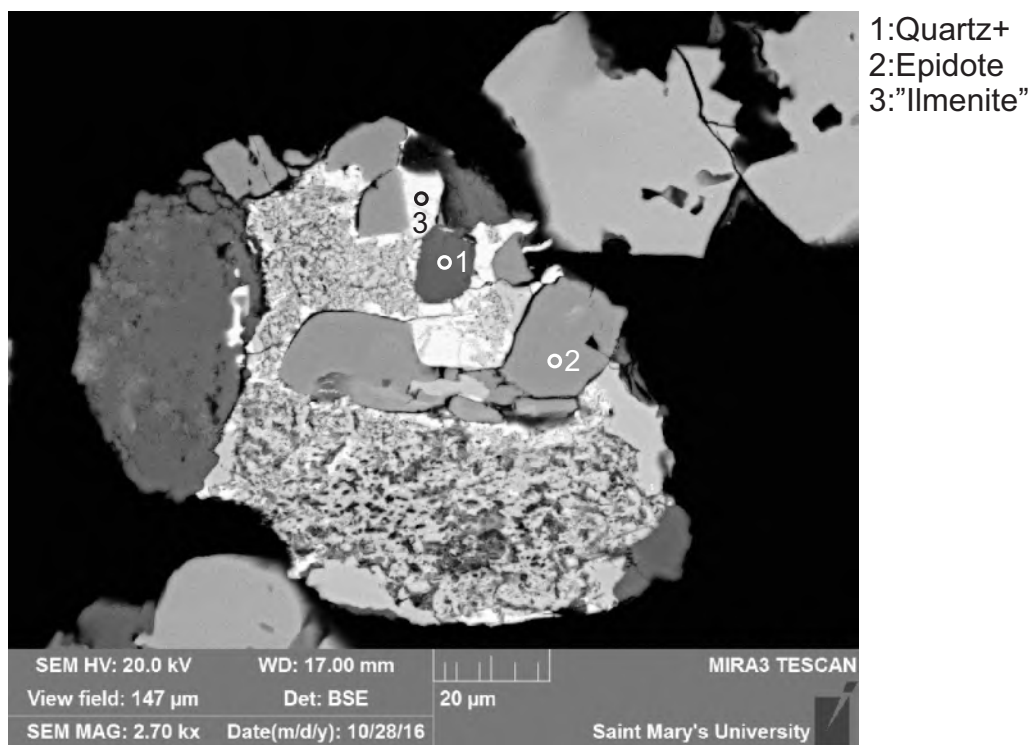

Figure B6.31: Sample S11 site 11.2 (SEM). Lithic clast consisting of quartz + epidote + ilmenite. Spongy mineral is probably titania replacing ilmenite. Hydrothermal vein.

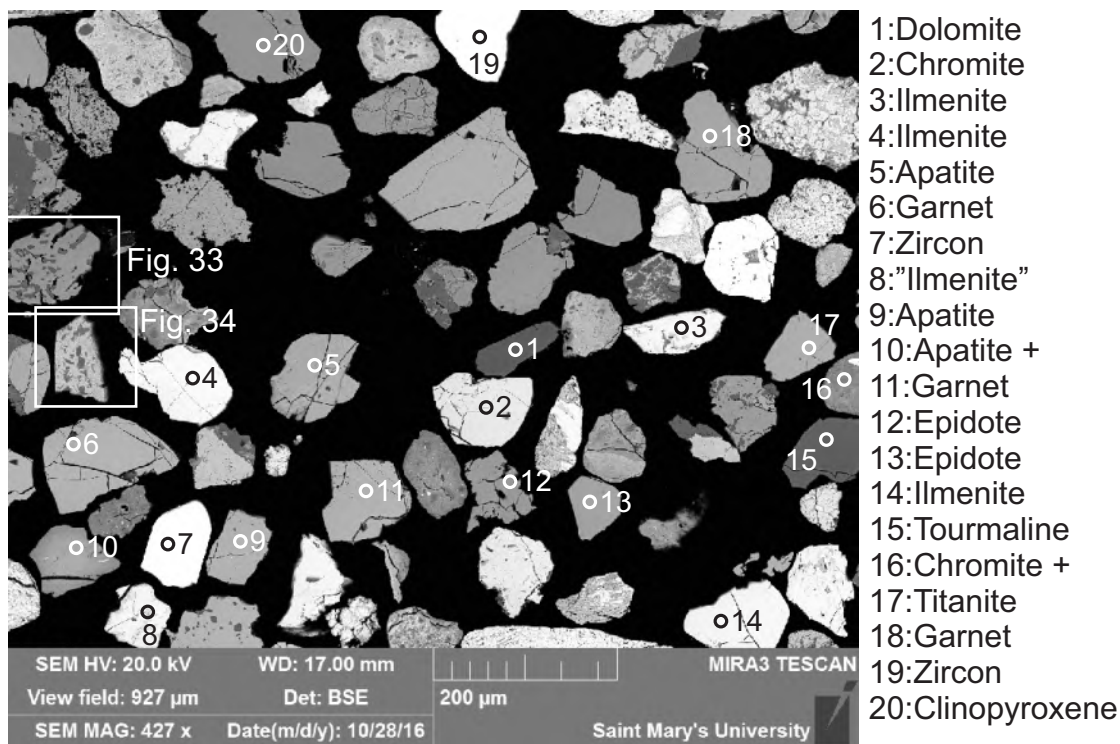

Figure B6.32: Sample S11 site 12 (SEM).

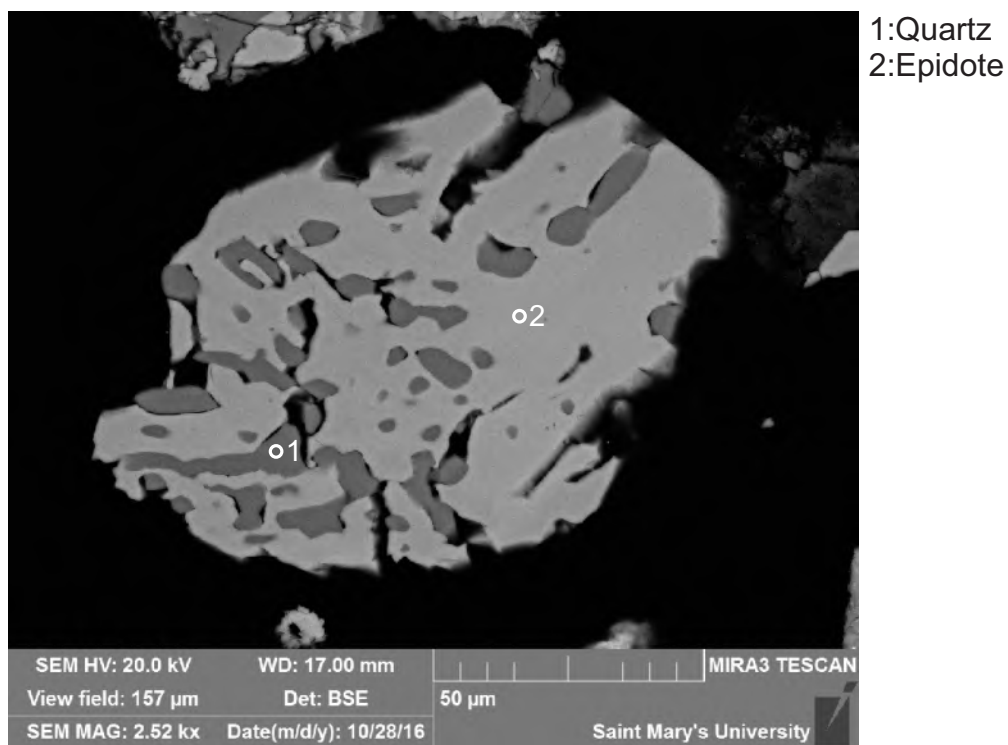

Figure B6.33: Sample S11 site 12.2 (SEM). Hydrothermal clast of quartz + epidote.

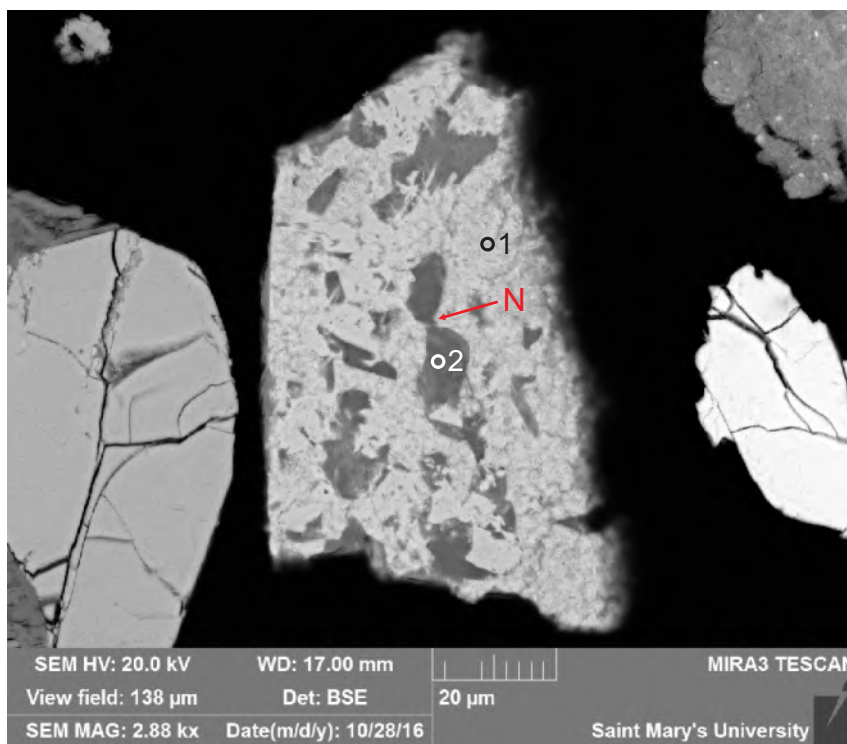

1:TiO<sub>2</sub>  
2:Quartz +  
N = necking

Figure B6.34: Sample S11 site 12.3 (SEM). Lithic clast of titania + quartz, probably altered ilmenite with quartz inclusions. Igneous.

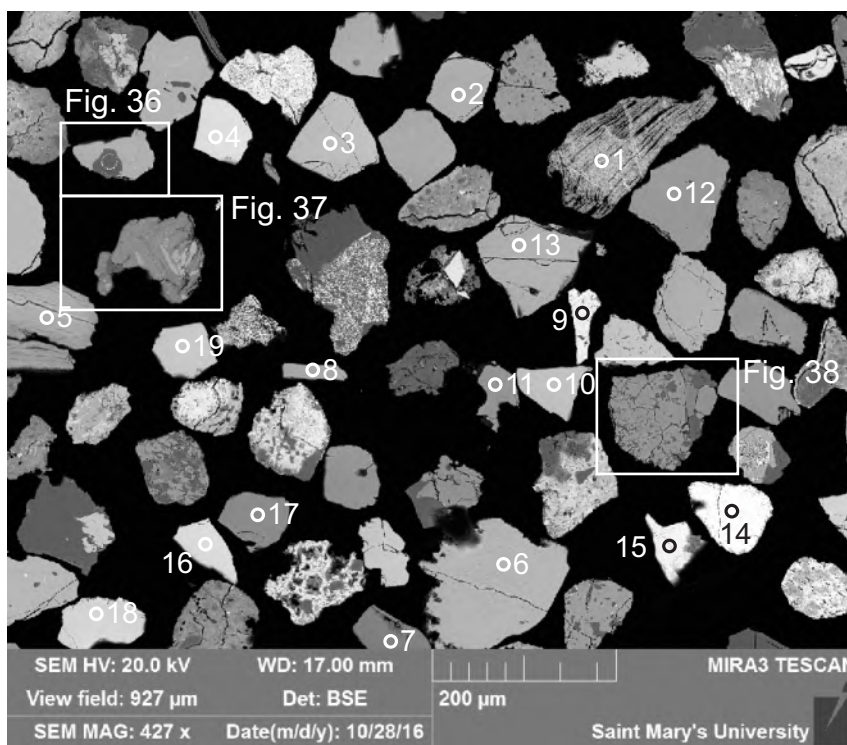

1:Mix  
2:Garnet  
3:Spinel  
4:Chromite  
5:Apatite +  
6:Apatite +  
7:Chlorite  
8:Apatite  
9:"Magnetite" +  
10:Chromite  
11:Garnet  
12:Garnet  
13:Spinel  
14:Fe-oxide/hydroxide +  
15:Ilmenite  
16:Chromite  
17:Epidote  
18:Chromite  
19:Chromite

Figure B6.35: Sample S11 site 13 (SEM).

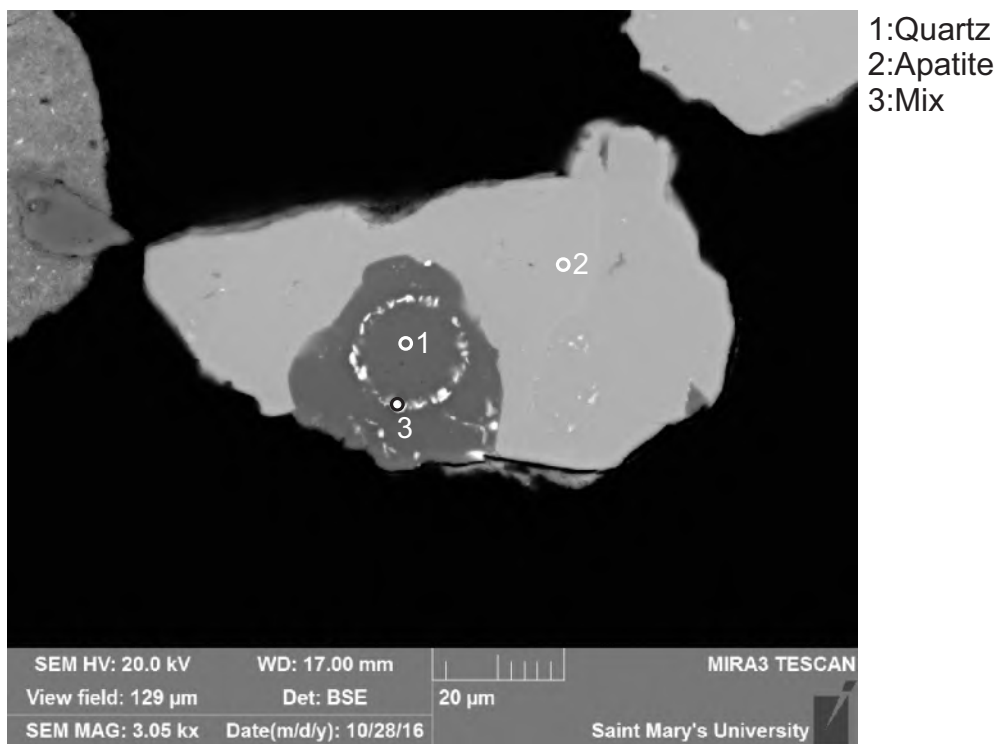

Figure B6.36: Sample S11 site 13.2 (SEM). Lithic clast consisting of quartz + apatite + Fe-oxide/hydroxide. ?Igneous.

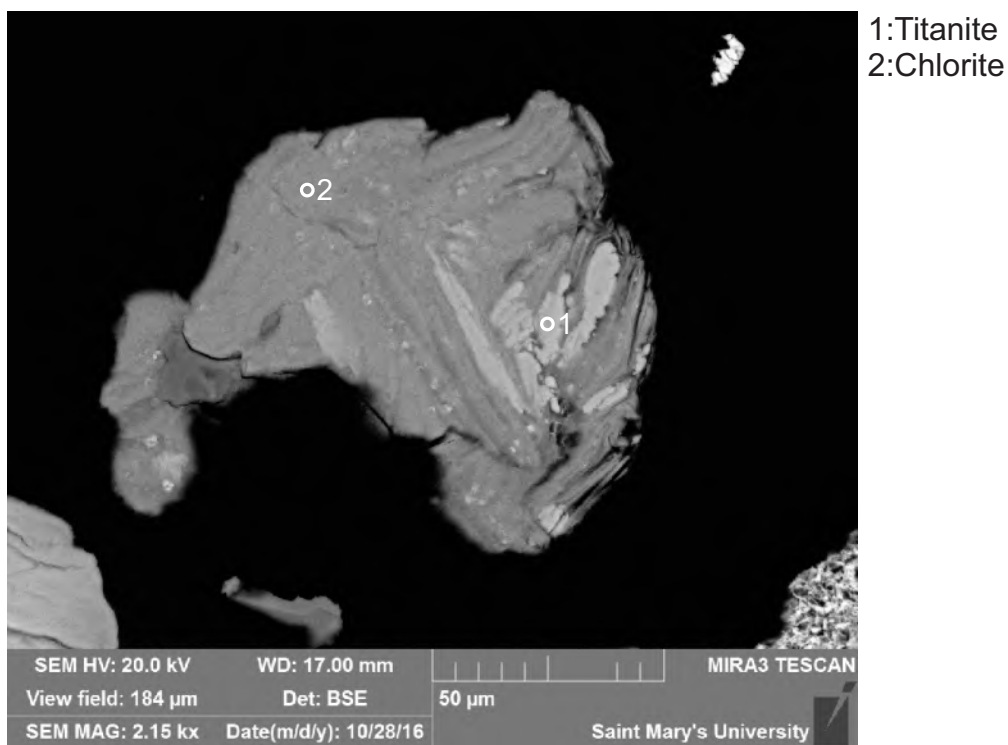

Figure B6.37: Sample S11 site 13.3 (SEM). Lithic clast consisting of titanite + chlorite. Metamorphic.



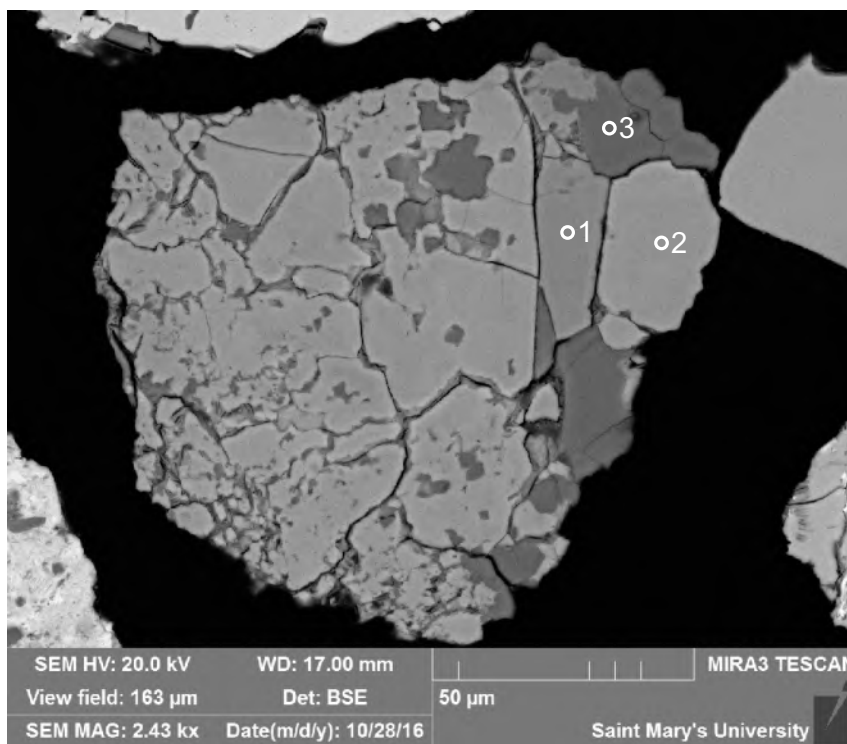

- 1:Epidote
- 2:Epidote
- 3:Quartz

Figure B6.38: Sample S11 site 13.4 (SEM). Hydrothermal clast of epidote + quartz.

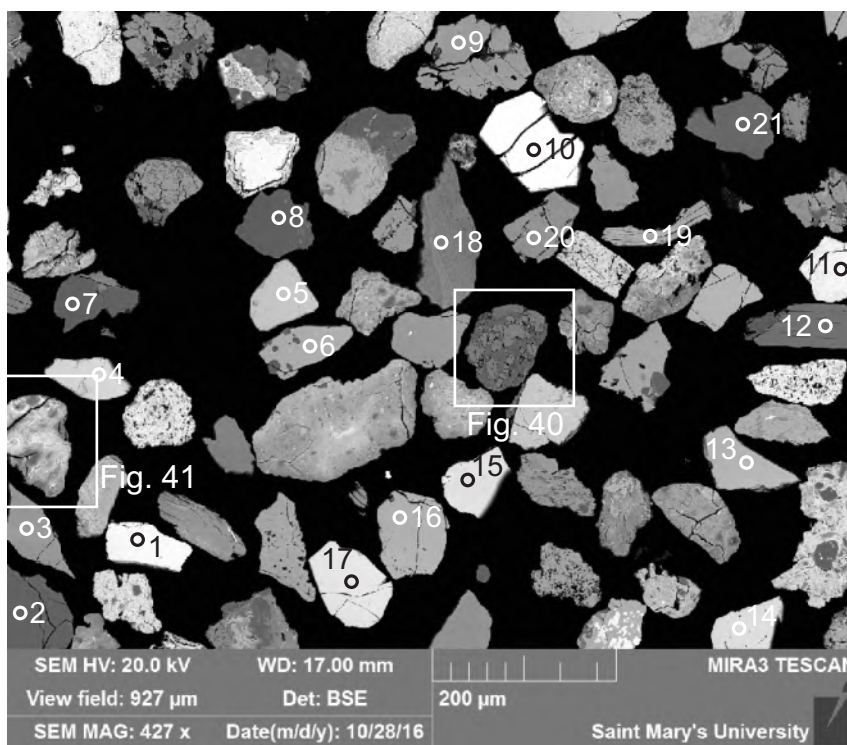

- 1:Ilmenite
- 2:Quartz
- 3:Garnet
- 4:Chromite
- 5:TiO<sub>2</sub>
- 6:Garnet
- 7:Quartz
- 8:Quartz
- 9:Garnet
- 10:Fe-oxide/hydroxide
- 11:Ilmenite
- 12:Orthopyroxene
- 13:Garnet
- 14:Chromite
- 15:Chromite
- 16:Titanite
- 17:Chromite
- 18:Apatite
- 19:Biotite +
- 20:Epidote
- 21:Tourmaline

Figure B6.39: Sample S11 site 14 (SEM).

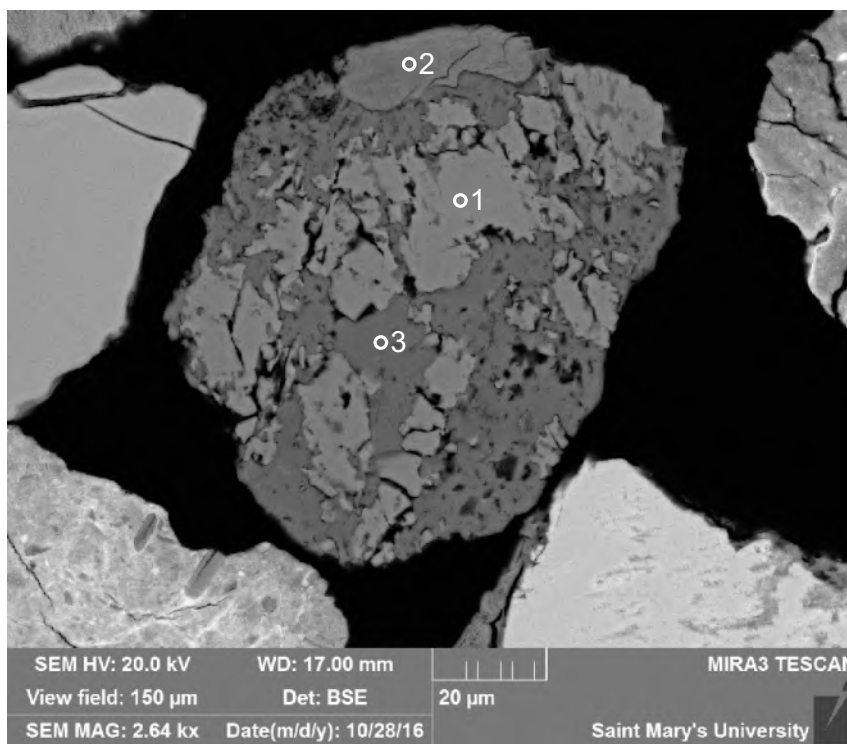

1:Epidote  
2:Chlorite  
3:Albite

Figure B6.40: Sample S11 site 14.2 (SEM). Lithic clast consisting of epidote + chlorite + albite. Hydrothermal.

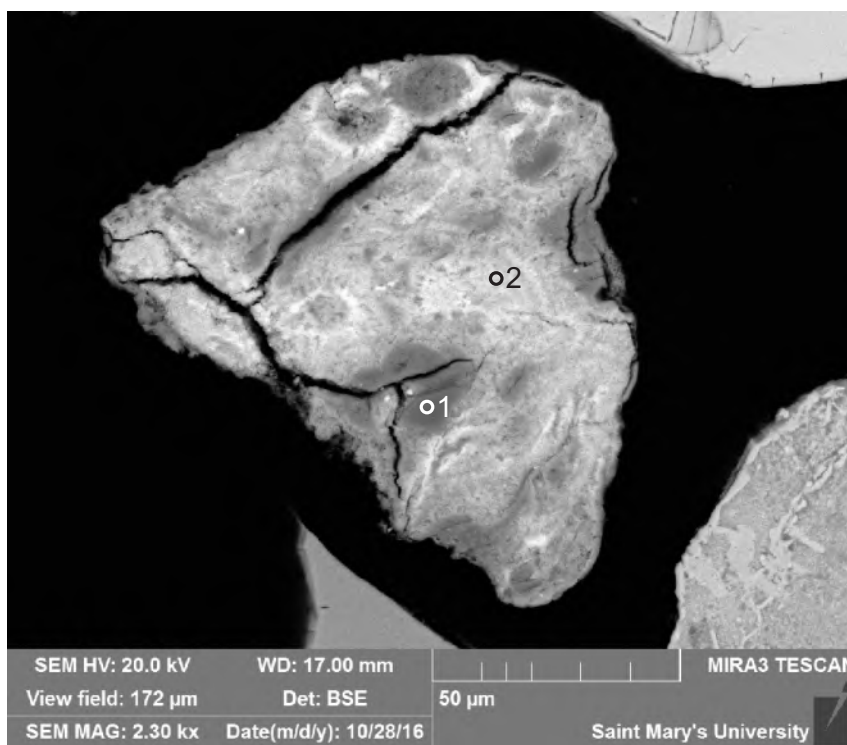

1:Quartz  
2:Mix (Feohy,  
chlorite, apatite)

Figure B6.41: Sample S11 site 14.3 (SEM). Texture appears hydrothermal.

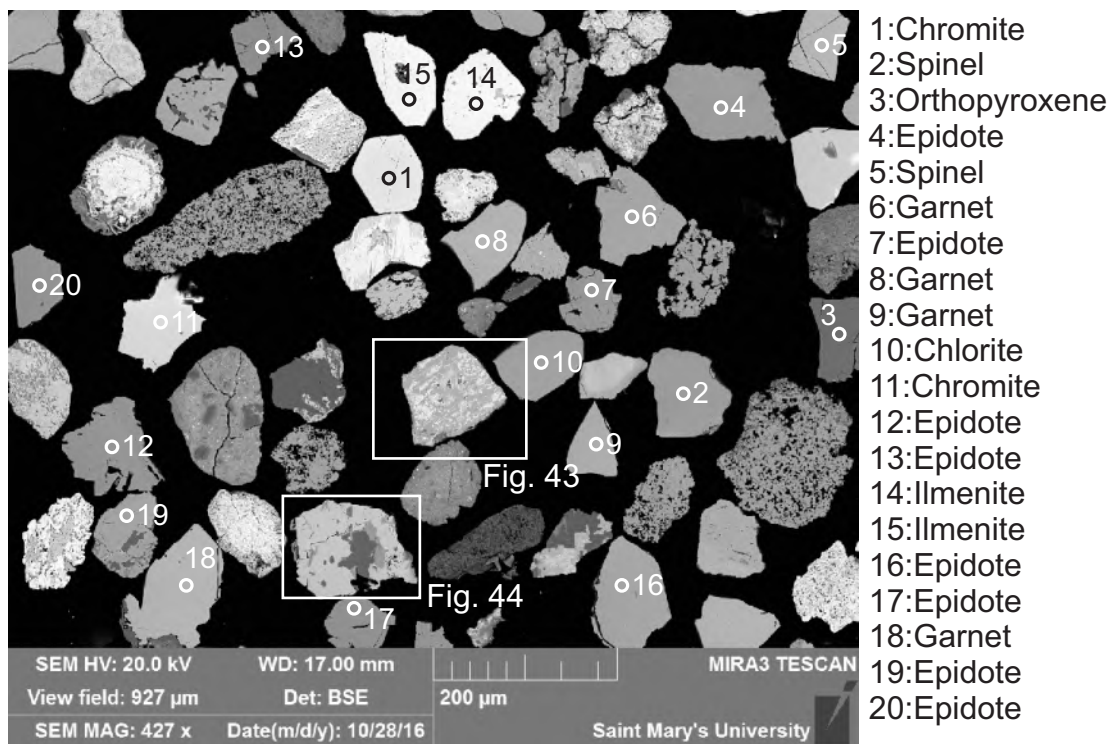

Figure B6.42: Sample S11 site 15 (SEM).

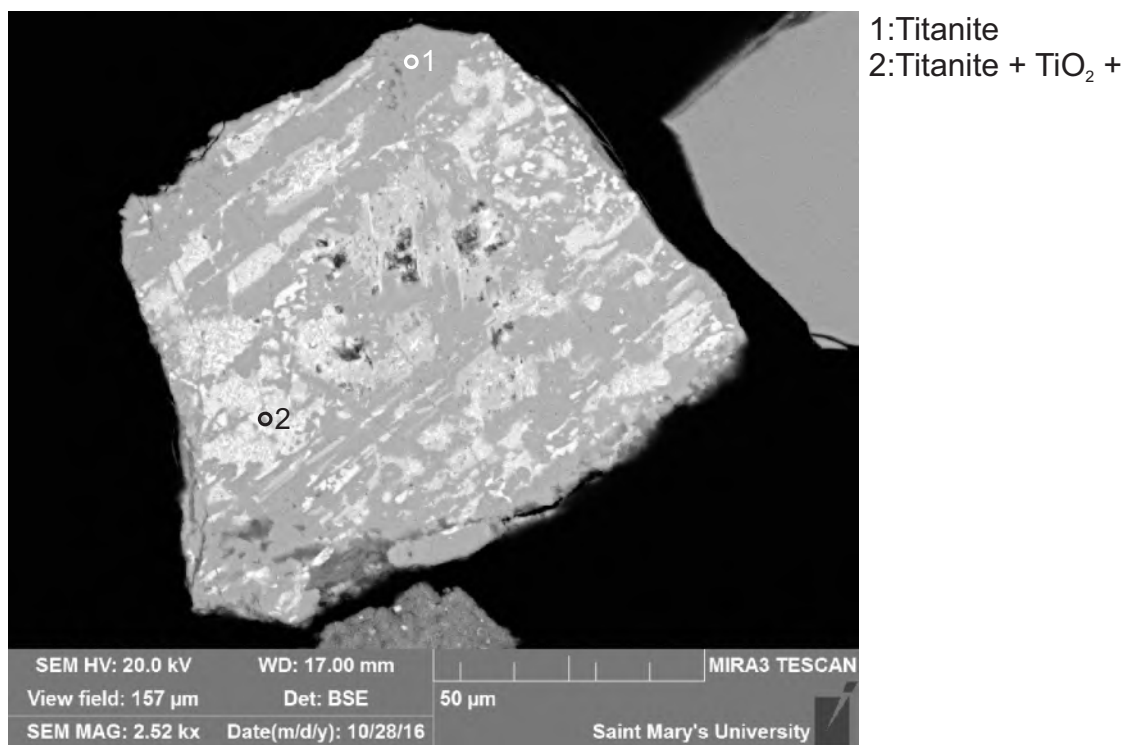

Figure B6.43: Sample S11 site 15.2 (SEM). Lithic clast of titanite + titania. Metamorphic.



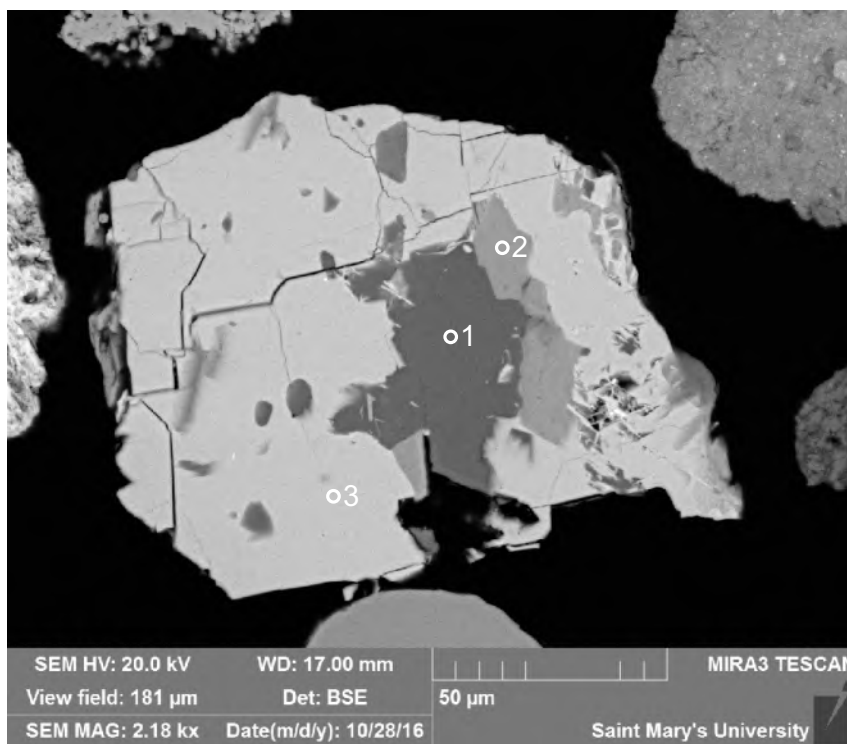

- 1:Quartz
- 2:Chlorite +
- 3:TiO<sub>2</sub>

Figure B6.44: Sample S11 site 15.3 (SEM). Lithic clast of quartz + chlorite + titania. Metamorphic.

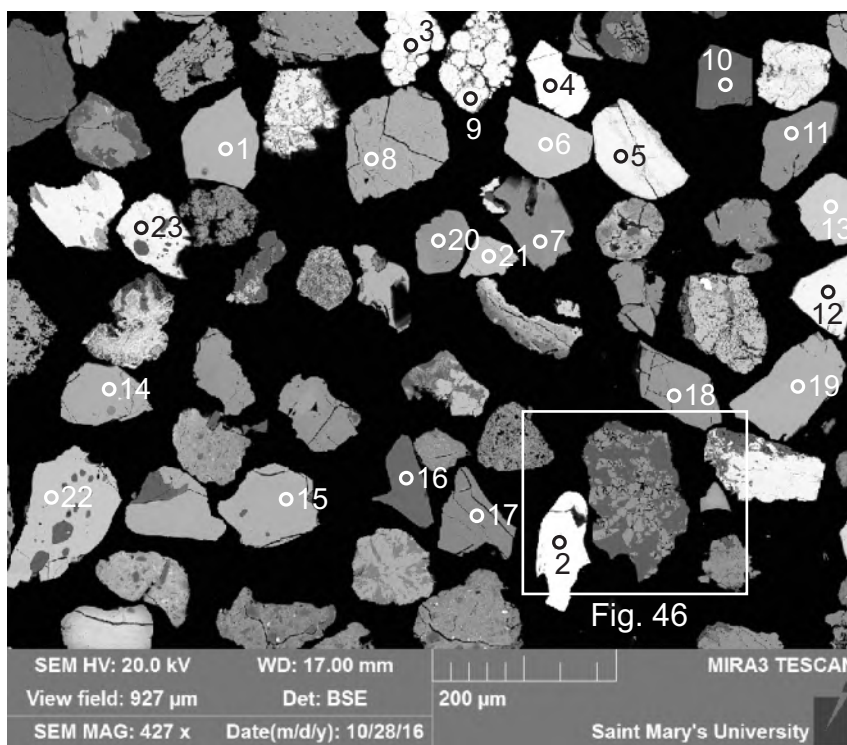

- 1:Garnet
- 2:Zircon
- 3:Pyrite
- 4:Fe- oxide/hydroxide
- 5:Ilmenite
- 6:TiO<sub>2</sub>
- 7:Epidote
- 8:Apatite
- 9:Pyrite
- 10:Tourmaline
- 11:Epidote
- 12:Ilmenite
- 13:Chromite
- 14:Titanite
- 15:Garnet
- 16:Tourmaline
- 17:Clinopyroxene
- 18:Garnet
- 19:Garnet
- 20:Garnet
- 21:Spinel
- 22:TiO<sub>2</sub>
- 23:Ilmenite

Figure B6.45: Sample S11 site 16 (SEM).



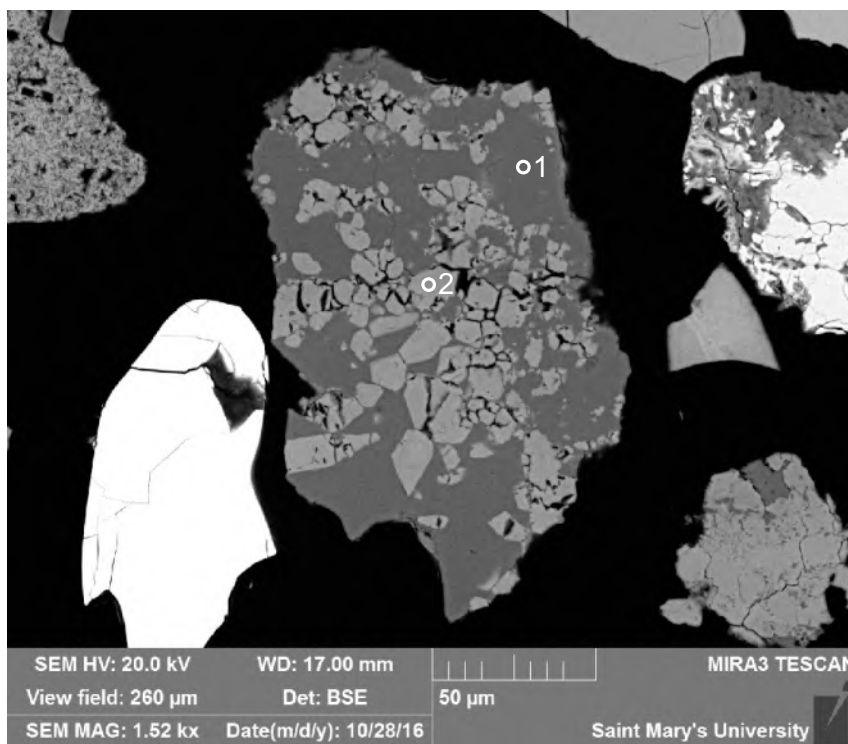

- 1:Quartz
- 2:Epidote

Figure B6.46: Sample S11 site 16.2 (SEM). Hydrothermal clast of quartz + epidote.

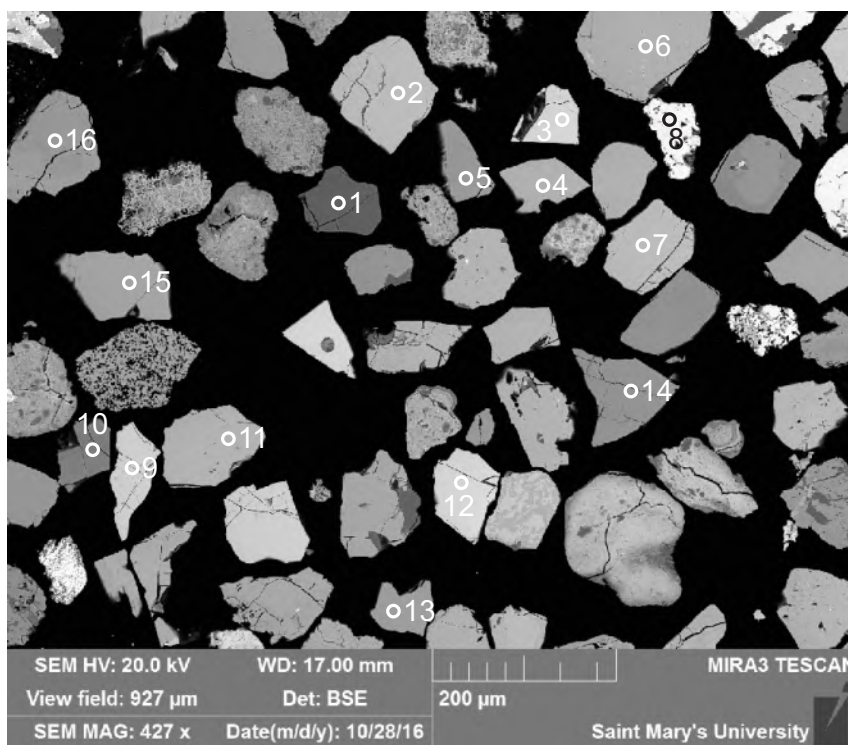

- 1:Dolomite
- 2:Titanite
- 3:Chromite
- 4:Garnet
- 5:Garnet
- 6:Garnet
- 7:Titanite
- 8:Magnetite +
- 9:Chromite
- 10:Staurolite
- 11:Garnet
- 12:Chromite
- 13:Garnet
- 14:Clinopyroxene
- 15:Garnet
- 16:Epidote

Figure B6.47: Sample S11 site 17 (SEM).

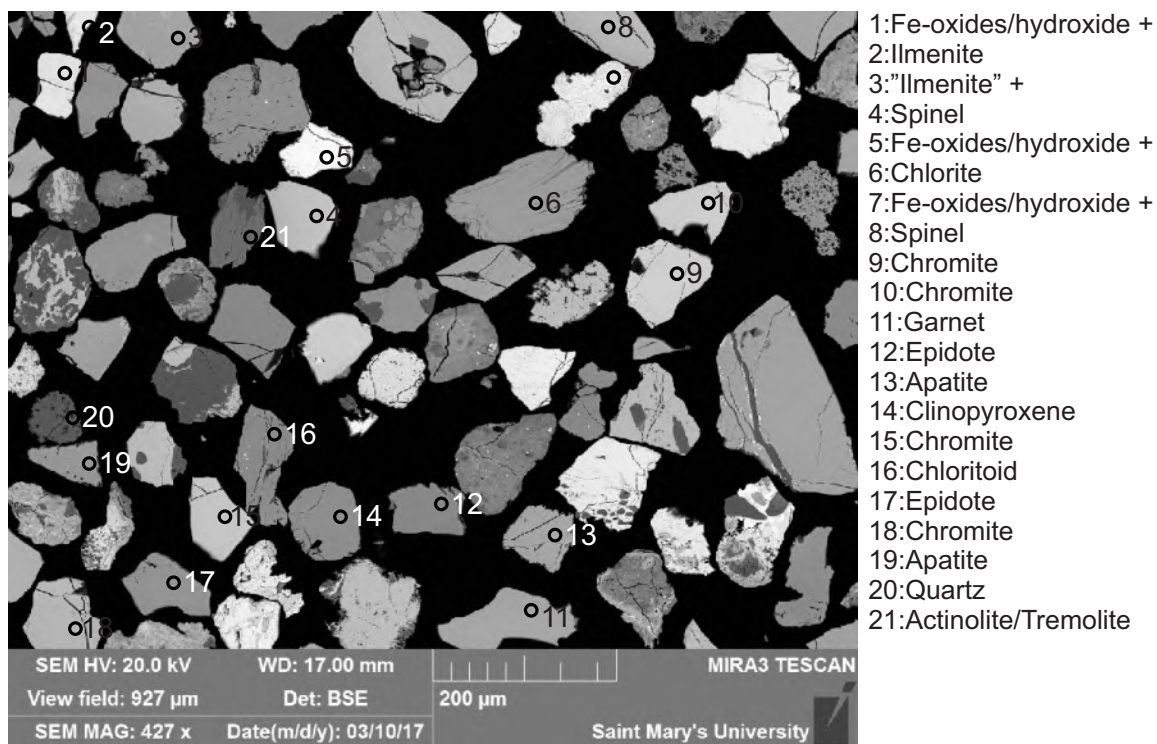

Figure B6.48: Sample S11 site 18 (SEM).

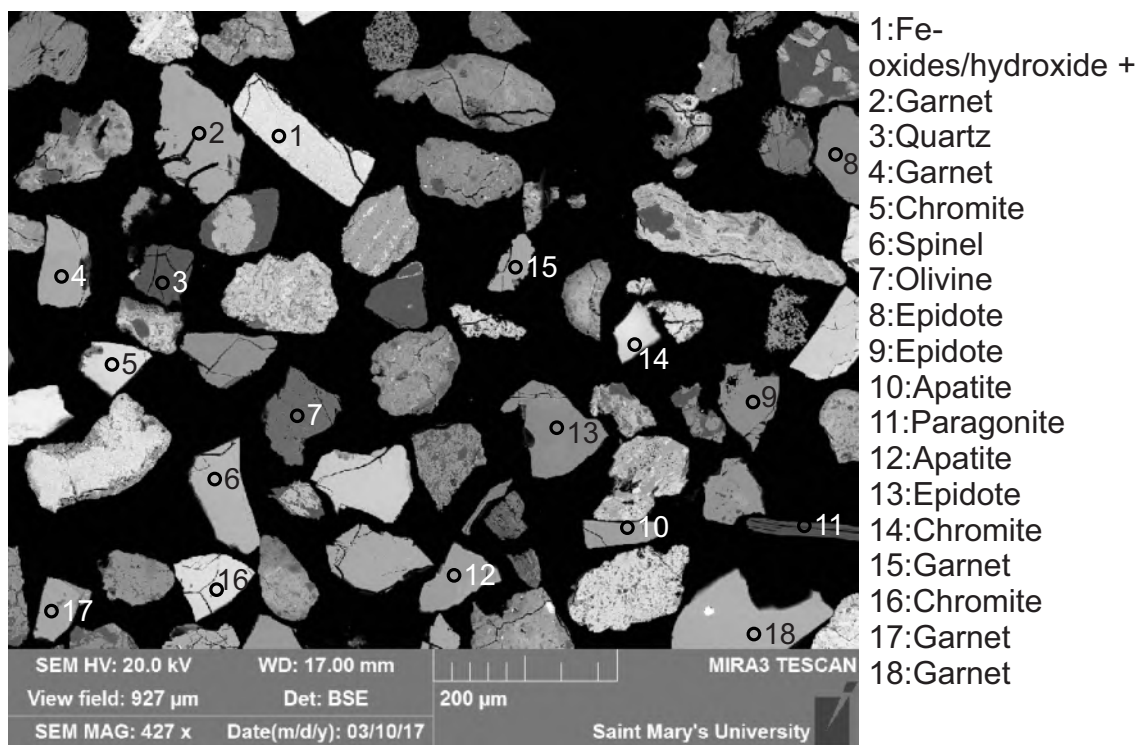

Figure B6.49: Sample S11 site 19 (SEM).

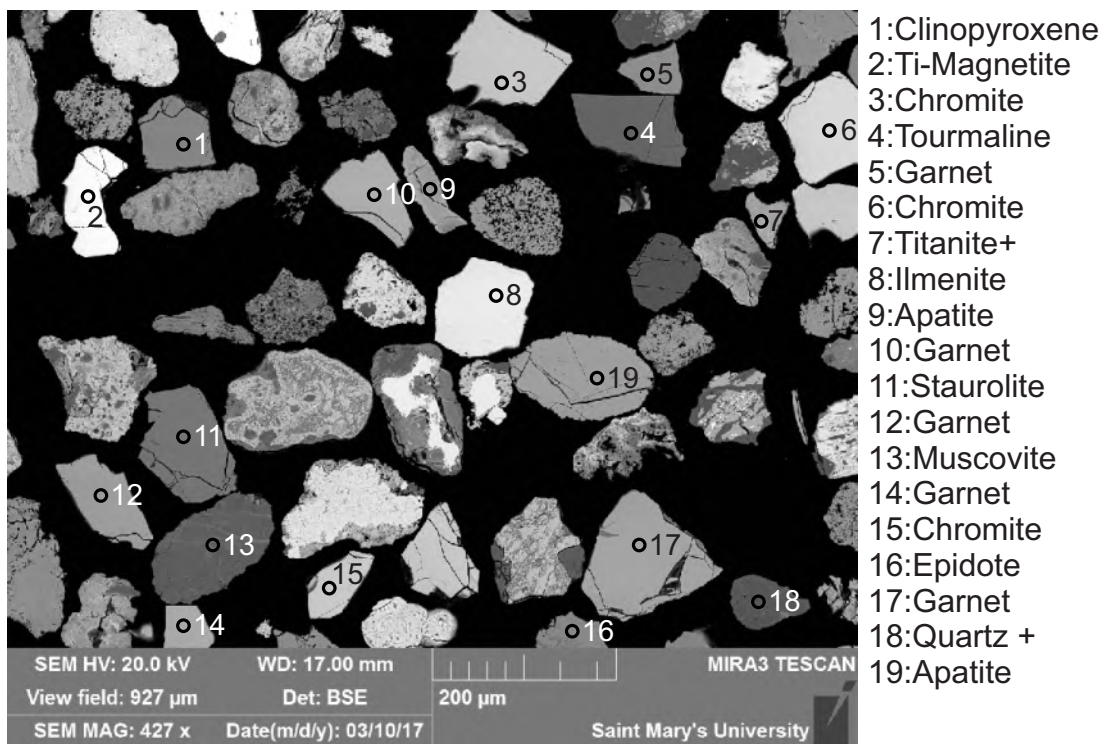

Figure B6.50: Sample S11 site 20 (SEM).

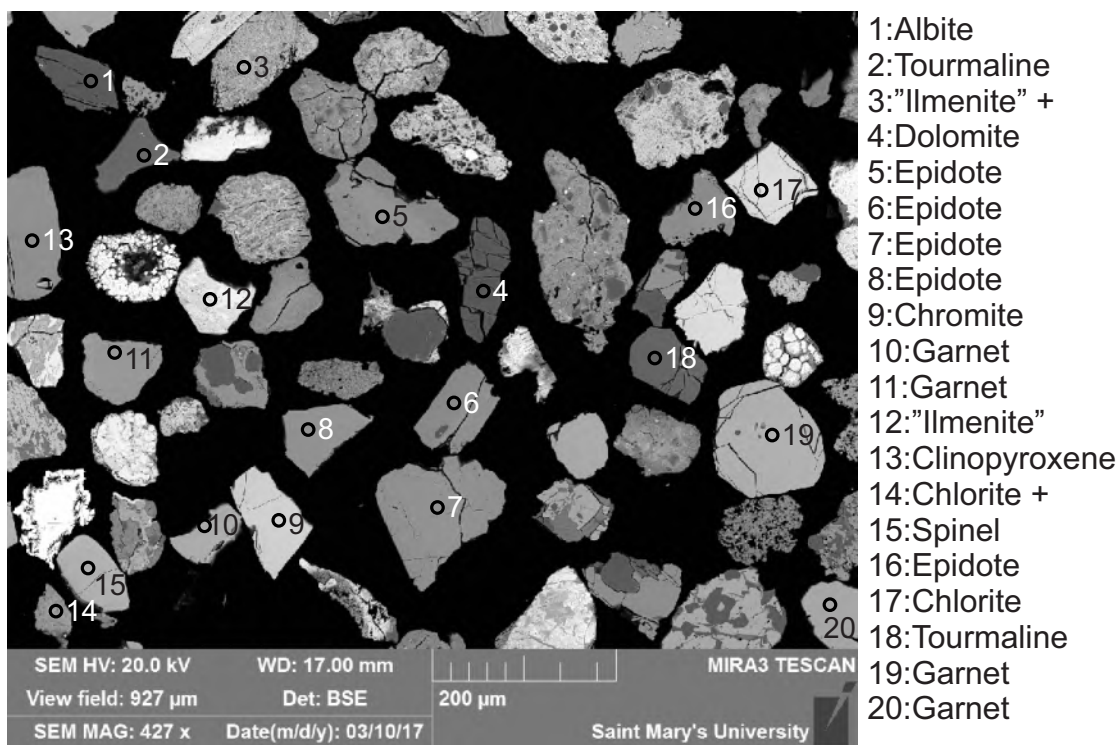

Figure B6.51: Sample S11 site 21 (SEM).



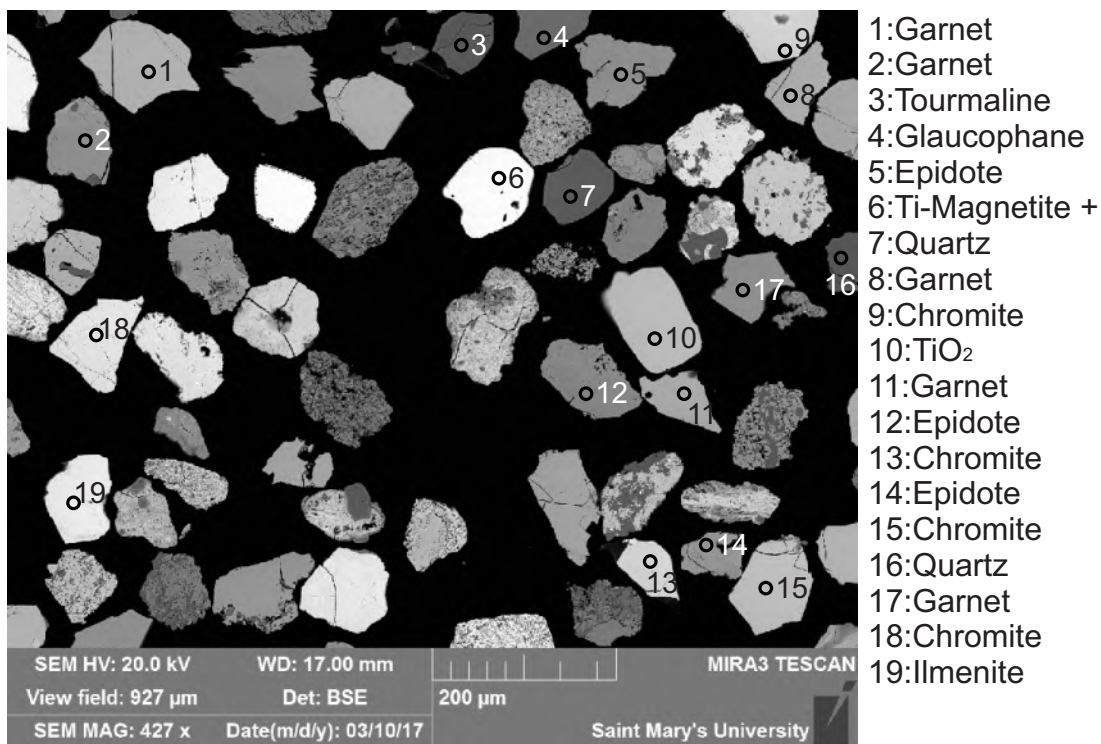

Figure B6.52: Sample S11 site 22 (SEM).

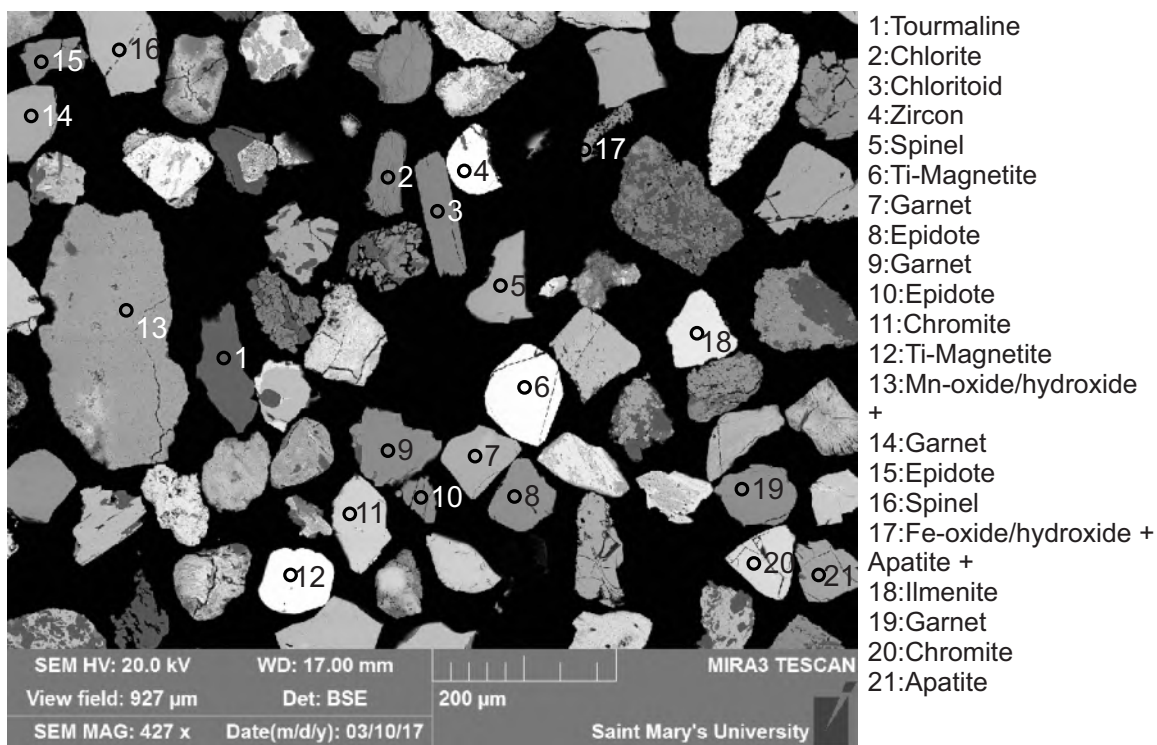

Figure B6.53: Sample S11 site 23 (SEM).



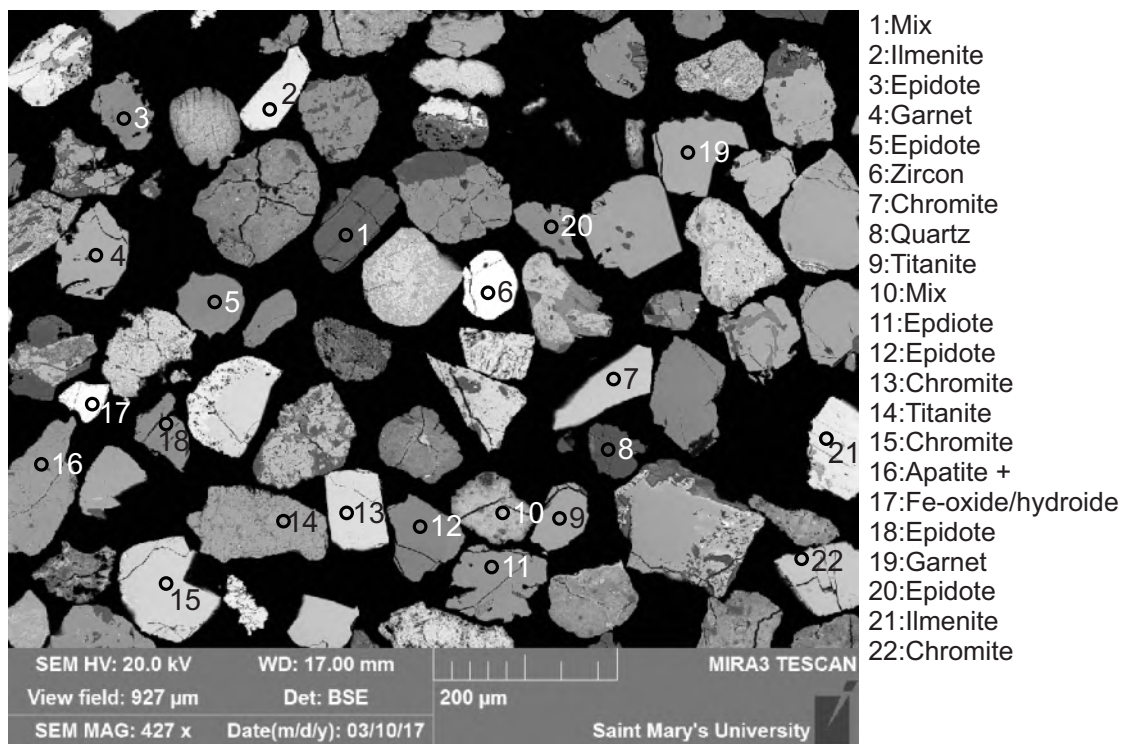

Figure B6.54: Sample S11 site 24 (SEM).

Table B6.1: EDS analyses of sample S11.

| Sample | Site | Position | Mineral | SiO2   | TiO2  | Al2O3 | FeO    | MnO  | MgO   | CaO   | Na2O  | K2O  | P2O5  | SO3   | F    | V2O5 | Cr2O3 | NiO  | CuO | ZnO | SrO  | ZrO2  | Nb2O5 | SnO2 | HfO2 | WO3   | Total | Actual Total |
|--------|------|----------|---------|--------|-------|-------|--------|------|-------|-------|-------|------|-------|-------|------|------|-------|------|-----|-----|------|-------|-------|------|------|-------|-------|--------------|
| S11    | 1    | 1        | Qz      | 100.00 |       |       |        |      |       |       |       |      |       |       |      |      |       |      |     |     |      |       |       |      |      |       | 100   | 119          |
| S11    | 1    | 2        | Ttn     | 33.57  | 35.23 | 2.70  | 0.41   |      |       | 28.08 |       |      |       |       |      |      |       |      |     |     |      |       |       |      |      |       | 100   | 109          |
| S11    | 1    | 3        | Chr     |        |       | 19.77 | 18.58  |      | 12.31 |       |       |      |       |       |      |      | 49.33 |      |     |     |      |       |       |      |      |       | 100   | 106          |
| S11    | 1    | 4        | Ep      | 39.57  |       | 21.36 | 13.45  |      |       | 22.62 |       |      |       |       |      |      |       |      |     |     |      |       |       |      |      |       | 97    | 106          |
| S11    | 1    | 5        | Py      | 0.23   |       |       | 30.79  |      |       | 0.35  | 0.48  |      |       | 68.15 |      |      |       |      |     |     |      |       |       |      |      |       | 100   | 200          |
| S11    | 1    | 6        | Ol      | 41.97  |       |       | 8.61   |      | 49.06 |       |       |      |       |       |      |      |       | 0.36 |     |     |      |       |       |      |      |       | 100   | 116          |
| S11    | 1    | 7        | Chl     | 25.97  |       | 20.14 | 25.68  | 0.49 | 12.72 |       |       |      |       |       |      |      |       |      |     |     |      |       |       |      |      |       | 85    | 98           |
| S11    | 1    | 8        | Ilm     |        | 53.17 |       | 44.36  | 2.47 |       |       |       |      |       |       |      |      |       |      |     |     |      |       |       |      |      |       | 100   | 104          |
| S11    | 1    | 9        | Spl     |        | 0.40  | 25.09 | 26.95  |      | 10.41 |       |       |      |       |       |      |      | 37.16 |      |     |     |      |       |       |      |      |       | 100   | 106          |
| S11    | 1    | 10       | Grt     | 39.82  |       | 21.31 | 30.76  | 0.61 | 5.96  | 1.54  |       |      |       |       |      |      |       |      |     |     |      |       |       |      |      |       | 100   | 115          |
| S11    | 1.2  | 1        | Qz      | 99.05  |       |       | 0.95   |      |       |       |       |      |       |       |      |      |       |      |     |     |      |       |       |      |      |       | 100   | 120          |
| S11    | 1.2  | 2        | Chl +   | 26.84  | 1.10  | 23.94 | 37.54  | 0.40 | 0.57  | 0.41  | 1.01  | 0.97 | 2.63  |       |      |      |       |      |     |     |      |       |       |      |      | 4.59  | 100   | 92           |
| S11    | 1.2  | 3        | Feohy + |        |       | 11.32 | 69.71  | 0.77 |       | 0.53  | 0.99  |      | 5.53  |       |      |      | 0.39  |      |     |     |      |       |       |      |      | 10.76 | 100   | 82           |
| S11    | 1.3  | 1        | Qz      | 100.00 |       |       |        |      |       |       |       |      |       |       |      |      |       |      |     |     |      |       |       |      |      |       | 100   | 119          |
| S11    | 1.3  | 2        | Grt     | 40.17  |       | 21.09 | 26.29  | 1.11 | 1.25  | 10.08 |       |      |       |       |      |      |       |      |     |     |      |       |       |      |      |       | 100   | 113          |
| S11    | 1.4  | 1        | Ttn     | 32.88  | 37.66 | 0.73  | 0.64   |      |       | 28.09 |       |      |       |       |      |      |       |      |     |     |      |       |       |      |      |       | 100   | 111          |
| S11    | 1.4  | 2        | Ilm     |        | 53.05 |       | 36.91  | 9.45 |       | 0.59  |       |      |       |       |      |      |       |      |     |     |      |       |       |      |      |       | 100   | 105          |
| S11    | 1.4  | 3        | TiO2 +  | 1.53   | 95.57 |       | 0.46   |      |       | 2.44  |       |      |       |       |      |      |       |      |     |     |      |       |       |      |      |       | 100   | 108          |
| S11    | 2    | 1        | Ep      | 40.41  |       | 28.23 | 5.50   |      |       | 22.86 |       |      |       |       |      |      |       |      |     |     |      |       |       |      |      |       | 97    | 111          |
| S11    | 2    | 2        | Dol     |        |       |       | 3.11   | 0.32 | 21.05 | 29.51 |       |      |       |       |      |      |       |      |     |     |      |       |       |      |      |       | 54    | 57           |
| S11    | 2    | 3        | Chr     |        |       | 23.54 | 16.65  |      | 14.35 |       |       |      |       |       |      |      | 45.46 |      |     |     |      |       |       |      |      |       | 100   | 108          |
| S11    | 2    | 4        | Ep      | 40.09  |       | 25.39 | 9.10   |      |       | 22.42 |       |      |       |       |      |      |       |      |     |     |      |       |       |      |      |       | 97    | 110          |
| S11    | 2    | 5        | Grt     | 40.65  |       | 21.53 | 29.74  | 1.87 | 4.21  | 2.00  |       |      |       |       |      |      |       |      |     |     |      |       |       |      |      |       | 100   | 117          |
| S11    | 2    | 6        | Zrn     | 30.91  |       |       |        |      |       |       |       |      |       |       |      |      |       |      |     |     |      | 67.68 |       |      | 1.41 |       | 100   | 122          |
| S11    | 2    | 7        | "Ilm"   |        | 30.44 | 0.63  | 67.45  | 0.40 | 1.08  |       |       |      |       |       |      |      |       |      |     |     |      |       |       |      |      |       | 100   | 101          |
| S11    | 2    | 8        | Chr     |        |       | 17.08 | 22.81  |      | 11.14 |       |       |      |       |       |      |      | 48.97 |      |     |     |      |       |       |      |      |       | 100   | 106          |
| S11    | 2    | 9        | Zrn     | 30.73  |       |       |        |      |       |       |       |      |       |       |      |      |       |      |     |     |      | 67.98 |       |      | 1.29 |       | 100   | 121          |
| S11    | 2    | 10       | Chr     |        |       | 16.78 | 18.15  |      | 11.75 |       |       |      |       |       |      |      | 53.33 |      |     |     |      |       |       |      |      |       | 100   | 109          |
| S11    | 2    | 11       | Ep      | 40.13  |       | 23.54 | 10.94  |      |       | 22.39 |       |      |       |       |      |      |       |      |     |     |      |       |       |      |      |       | 97    | 111          |
| S11    | 2    | 12       | Chr     |        | 0.48  | 25.44 | 19.25  |      | 14.15 |       |       |      |       |       |      |      | 40.69 |      |     |     |      |       |       |      |      |       | 100   | 109          |
| S11    | 2    | 13       | Ap      | 1.06   |       |       | 0.33   |      |       | 45.52 | 1.34  |      | 37.80 | 2.34  | 8.05 |      |       |      |     |     | 2.77 |       |       |      |      | 0.77  | 100   | 109          |
| S11    | 2    | 14       | Chl     | 27.17  |       | 20.44 | 20.67  | 0.28 | 16.45 |       |       |      |       |       |      |      |       |      |     |     |      |       |       |      |      |       | 85    | 94           |
| S11    | 2    | 15       | Mag     |        |       |       | 100.00 |      |       |       |       |      |       |       |      |      |       |      |     |     |      |       |       |      |      |       | 100   | 98           |
| S11    | 2    | 16       | Ttn     | 32.93  | 36.92 | 1.16  | 1.51   |      |       | 27.48 |       |      |       |       |      |      |       |      |     |     |      |       |       |      |      |       | 100   | 112          |
| S11    | 2.2  | 1        | Ep      | 39.68  |       | 24.42 | 10.40  |      |       | 22.49 |       |      |       |       |      |      |       |      |     |     |      |       |       |      |      |       | 97    | 110          |
| S11    | 2.2  | 2        | Ab      | 69.34  |       | 18.81 |        |      |       | 0.39  | 11.46 |      |       |       |      |      |       |      |     |     |      |       |       |      |      |       | 100   | 118          |
| S11    | 2.3  | 1        | Ilm     |        | 49.46 |       | 47.51  | 3.02 |       |       |       |      |       |       |      |      |       |      |     |     |      |       |       |      |      |       | 100   | 105          |
| S11    | 2.3  | 2        | TiO2    | 0.44   | 99.18 |       | 0.38   |      |       |       |       |      |       |       |      |      |       |      |     |     |      |       |       |      |      |       | 100   | 107          |
| S11    | 3    | 1        | Grt     | 41.52  |       | 20.67 | 3.05   | 0.70 |       | 34.06 |       |      |       |       |      |      |       |      |     |     |      |       |       |      |      |       | 100   | 112          |
| S11    | 3    | 2        | Grt     | 34.47  |       | 3.41  | 8.78   |      | 1.22  | 34.90 |       |      |       |       |      |      | 17.23 |      |     |     |      |       |       |      |      |       | 100   | 98           |
| S11    | 3    | 3        | Chl     | 32.68  | 0.45  | 20.93 | 25.14  | 0.50 | 19.96 |       |       |      |       |       |      |      | 0.33  |      |     |     |      |       |       |      |      |       | 100   | 96           |
| S11    | 3    | 4        | Chr     |        |       | 5.24  | 23.11  |      | 7.30  |       |       |      |       |       |      |      | 64.34 |      |     |     |      |       |       |      |      |       | 100   | 106          |
| S11    | 3    | 5        | Spl     |        |       | 29.09 | 16.25  |      | 13.64 |       |       |      |       |       |      |      | 41.01 |      |     |     |      |       |       |      |      |       | 100   | 110          |
| S11    | 3    | 6        | Grt     | 39.19  |       | 21.06 | 34.44  | 0.53 | 2.36  | 2.41  |       |      |       |       |      |      |       |      |     |     |      |       |       |      |      |       | 100   | 111          |
| S11    | 3    | 7        | Ep      | 39.67  |       | 20.85 | 6.17   | 1.76 | 0.55  | 28.00 |       |      |       |       |      |      |       |      |     |     |      |       |       |      |      |       | 97    | 115          |
| S11    | 3    | 8        | Grt     | 39.48  |       | 21.13 | 33.94  | 0.31 | 4.59  | 0.56  |       |      |       |       |      |      |       |      |     |     |      |       |       |      |      |       | 100   | 115          |
| S11    | 3    | 9        | Ep      | 40.21  |       | 24.35 | 9.96   |      |       | 22.48 |       |      |       |       |      |      |       |      |     |     |      |       |       |      |      |       | 97    | 110          |
| S11    | 3    | 10       | Ilm     |        | 54.07 |       | 43.05  | 2.89 |       |       |       |      |       |       |      |      |       |      |     |     |      |       |       |      |      |       | 100   | 109          |
| S11    | 3    | 11       | Qz      | 100.00 |       |       |        |      |       |       |       |      |       |       |      |      |       |      |     |     |      |       |       |      |      |       | 100   | 116          |
| S11    | 3    | 12       | "Mag" + | 2.63   |       | 0.99  | 92.80  |      | 0.60  | 0.47  |       |      |       |       |      |      |       |      |     |     |      |       |       |      |      | 2.50  | 100   | 84           |

Table B6.1: EDS analyses of sample S11.

| Sample | Site | Position | Mineral    | SiO2   | TiO2   | Al2O3 | FeO   | MnO   | MgO   | CaO   | Na2O | K2O  | P2O5  | SO3   | F    | V2O5 | Cr2O3 | NiO  | CuO | ZnO | SrO | ZrO2  | Nb2O5 | SnO2 | HfO2 | WO3  | Total | Actual Total |
|--------|------|----------|------------|--------|--------|-------|-------|-------|-------|-------|------|------|-------|-------|------|------|-------|------|-----|-----|-----|-------|-------|------|------|------|-------|--------------|
| S11    | 3    | 13       | Ttn        | 33.39  | 33.95  | 3.66  | 0.76  |       |       | 27.03 |      |      |       |       | 1.22 |      |       |      |     |     |     |       |       |      |      |      | 100   | 107          |
| S11    | 3    | 14       | Ep         | 39.80  |        | 21.38 | 13.17 |       |       | 22.65 |      |      |       |       |      |      |       |      |     |     |     |       |       |      |      |      | 97    | 105          |
| S11    | 3    | 15       | Grt        | 39.64  |        | 20.86 | 21.92 | 8.79  | 0.64  | 8.16  |      |      |       |       |      |      |       |      |     |     |     |       |       |      |      |      | 100   | 111          |
| S11    | 3    | 16       | Ep         | 40.03  |        | 24.53 | 9.80  | 0.30  |       | 22.34 |      |      |       |       |      |      |       |      |     |     |     |       |       |      |      |      | 97    | 109          |
| S11    | 3    | 17       | Grt        | 39.17  |        | 20.79 | 19.59 | 15.72 | 1.57  | 3.16  |      |      |       |       |      |      |       |      |     |     |     |       |       |      |      |      | 100   | 112          |
| S11    | 3.2  | 1        | TiO2 +     | 3.19   | 96.13  |       | 0.69  |       |       |       |      |      |       |       |      |      |       |      |     |     |     |       |       |      |      |      | 100   | 105          |
| S11    | 3.2  | 2        | Qz         | 97.48  | 0.46   | 1.21  | 0.31  |       |       |       |      | 0.55 |       |       |      |      |       |      |     |     |     |       |       |      |      |      | 100   | 120          |
| S11    | 3.2  | 3        | Qz         | 98.68  |        | 0.78  | 0.25  |       |       |       |      | 0.29 |       |       |      |      |       |      |     |     |     |       |       |      |      |      | 100   | 120          |
| S11    | 4    | 1        | Tur        | 38.44  | 0.31   | 34.95 | 3.33  |       | 7.32  | 0.75  | 1.89 |      |       |       |      |      |       |      |     |     |     |       |       |      |      |      | 87    | 97           |
| S11    | 4    | 2        | Chr        |        |        | 19.17 | 21.86 |       | 11.42 |       |      |      |       |       |      |      | 47.56 |      |     |     |     |       |       |      |      |      | 100   | 105          |
| S11    | 4    | 3        | Chl        | 25.40  |        | 18.60 | 30.89 | 0.88  | 8.59  |       | 0.63 |      |       |       |      |      |       |      |     |     |     |       |       |      |      |      | 85    | 95           |
| S11    | 4    | 4        | Chr        |        |        | 13.02 | 23.30 |       | 11.18 |       |      |      |       |       |      |      | 52.51 |      |     |     |     |       |       |      |      |      | 100   | 109          |
| S11    | 4    | 5        | "Ilm"      |        | 31.19  |       | 68.18 | 0.63  |       |       |      |      |       |       |      |      |       |      |     |     |     |       |       |      |      |      | 100   | 100          |
| S11    | 4    | 6        | TiO2       |        | 99.45  |       | 0.55  |       |       |       |      |      |       |       |      |      |       |      |     |     |     |       |       |      |      |      | 100   | 109          |
| S11    | 4    | 7        | Py         |        |        |       | 30.21 | 0.59  |       | 0.20  | 0.42 |      |       | 68.58 |      |      |       |      |     |     |     |       |       |      |      |      | 100   | 203          |
| S11    | 4    | 8        | Spl        |        |        | 31.18 | 15.78 |       | 14.65 |       |      |      |       |       |      |      | 38.39 |      |     |     |     |       |       |      |      |      | 100   | 110          |
| S11    | 4    | 9        | Grt        | 39.68  |        | 21.07 | 27.64 | 5.30  | 3.03  | 3.30  |      |      |       |       |      |      |       |      |     |     |     |       |       |      |      |      | 100   | 114          |
| S11    | 4    | 10       | Grt        | 41.12  | 0.80   | 16.22 | 7.47  | 0.31  | 0.40  | 33.68 |      |      |       |       |      |      |       |      |     |     |     |       |       |      |      |      | 100   | 112          |
| S11    | 4.2  | 1        | Chl +      | 37.24  | 3.01   | 18.97 | 24.50 | 0.32  | 14.09 | 0.52  | 1.01 | 0.33 |       |       |      |      |       |      |     |     |     |       |       |      |      |      | 100   | 99           |
| S11    | 4.2  | 2        | Qz         | 98.55  | 1.09   | 0.36  |       |       |       |       |      |      |       |       |      |      |       |      |     |     |     |       |       |      |      |      | 100   | 118          |
| S11    | 4.2  | 3        | TiO2       | 0.91   | 98.33  |       | 0.47  |       |       | 0.29  |      |      |       |       |      |      |       |      |     |     |     |       |       |      |      |      | 100   | 106          |
| S11    | 4.2  | 4        | Zrn        | 31.15  | 1.09   |       | 0.38  |       |       | 0.45  |      |      |       |       |      |      |       |      |     |     |     | 66.94 |       |      |      |      | 100   | 117          |
| S11    | 4.2  | 5        | Ttn        | 33.01  | 37.32  | 1.75  | 0.49  |       |       | 27.43 |      |      |       |       |      |      |       |      |     |     |     |       |       |      |      |      | 100   | 111          |
| S11    | 5    | 1        | Chr        |        |        | 21.99 | 16.81 |       | 13.41 |       |      |      |       |       |      |      | 47.80 |      |     |     |     |       |       |      |      |      | 100   | 107          |
| S11    | 5    | 2        | Grt        | 39.89  |        | 21.29 | 27.95 | 1.87  | 2.26  | 6.74  |      |      |       |       |      |      |       |      |     |     |     |       |       |      |      |      | 100   | 112          |
| S11    | 5    | 3        | Chr        |        | 0.36   | 13.08 | 23.28 |       | 8.67  |       |      |      |       |       |      |      | 54.61 |      |     |     |     |       |       |      |      |      | 100   | 107          |
| S11    | 5    | 4        | TiO2       |        | 100.00 |       |       |       |       |       |      |      |       |       |      |      |       |      |     |     |     |       |       |      |      |      | 100   | 107          |
| S11    | 5    | 5        | Cld        | 26.58  |        | 40.65 | 23.25 |       | 2.52  |       |      |      |       |       |      |      |       |      |     |     |     |       |       |      |      |      | 93    | 99           |
| S11    | 5    | 6        | Qz         | 99.67  |        |       | 0.33  |       |       |       |      |      |       |       |      |      |       |      |     |     |     |       |       |      |      |      | 100   | 120          |
| S11    | 5    | 7        | Grt        | 39.52  |        | 21.05 | 28.97 | 6.22  | 2.83  | 1.40  |      |      |       |       |      |      |       |      |     |     |     |       |       |      |      |      | 100   | 114          |
| S11    | 5    | 8        | Grt        | 41.84  |        | 21.68 | 2.16  |       |       | 34.32 |      |      |       |       |      |      |       |      |     |     |     |       |       |      |      |      | 100   | 116          |
| S11    | 5    | 9        | Olig       | 63.60  |        | 22.56 | 0.27  |       |       | 4.50  | 9.07 |      |       |       |      |      |       |      |     |     |     |       |       |      |      |      | 100   | 115          |
| S11    | 5    | 10       | Ep         | 40.18  |        | 24.38 | 9.80  |       |       | 22.65 |      |      |       |       |      |      |       |      |     |     |     |       |       |      |      |      | 97    | 105          |
| S11    | 5.2  | 1        | Feohy +    | 4.09   | 1.38   | 8.17  | 68.91 | 0.64  |       | 3.33  | 0.78 |      | 5.78  |       |      |      |       | 0.55 |     |     |     |       |       |      |      | 6.36 | 100   | 78           |
| S11    | 5.2  | 2        | Feohy + Ap | 3.47   | 1.04   | 6.00  | 47.20 | 0.72  |       | 17.99 | 0.59 |      | 17.76 |       |      |      |       |      |     |     |     |       |       |      |      | 5.22 | 100   | 68           |
| S11    | 5.2  | 3        | Ap +       | 3.39   |        | 2.13  | 0.79  |       |       | 47.05 |      | 0.47 | 37.96 |       | 6.07 |      |       |      |     |     |     |       |       |      |      | 2.13 | 100   | 53           |
| S11    | 5.2  | 4        | Ms + Ap +  | 41.13  |        | 25.38 | 2.35  |       | 1.56  | 10.74 | 0.37 | 7.24 | 11.23 |       |      |      |       |      |     |     |     |       |       |      |      |      | 100   | 92           |
| S11    | 5.2  | 5        | Qz + Ap    | 65.64  |        | 0.69  | 0.39  |       |       | 16.30 |      |      | 16.99 |       |      |      |       |      |     |     |     |       |       |      |      |      | 100   | 93           |
| S11    | 5.3  | 1        | Sd         | 0.80   |        | 0.77  | 48.66 | 0.45  |       | 0.30  | 0.53 |      | 1.31  |       |      |      |       |      |     |     |     |       |       |      |      | 3.19 | 56    | 65           |
| S11    | 5.3  | 2        | "Mag" +    | 1.42   |        |       | 91.31 | 0.47  |       | 0.50  |      |      | 1.93  |       |      |      |       |      |     |     |     |       |       |      |      | 4.38 | 100   | 74           |
| S11    | 6    | 1        | Qz         | 100.00 |        |       |       |       |       |       |      |      |       |       |      |      |       |      |     |     |     |       |       |      |      |      | 100   | 122          |
| S11    | 6    | 2        | Grt        | 40.14  |        | 21.27 | 23.31 | 1.92  | 3.43  | 9.93  |      |      |       |       |      |      |       |      |     |     |     |       |       |      |      |      | 100   | 113          |
| S11    | 6    | 3        | "Ilm"      |        | 66.08  |       | 30.82 | 3.10  |       |       |      |      |       |       |      |      |       |      |     |     |     |       |       |      |      |      | 100   | 98           |
| S11    | 6    | 4        | Grt        | 40.02  |        | 21.18 | 28.14 | 0.43  | 3.35  | 6.87  |      |      |       |       |      |      |       |      |     |     |     |       |       |      |      |      | 100   | 110          |
| S11    | 6    | 5        | Ep         | 40.04  |        | 24.75 | 9.38  | 0.25  |       | 22.57 |      |      |       |       |      |      |       |      |     |     |     |       |       |      |      |      | 97    | 107          |
| S11    | 6    | 6        | Spl        |        |        | 25.88 | 18.53 |       | 13.85 |       |      |      |       |       |      |      | 41.75 |      |     |     |     |       |       |      |      |      | 100   | 105          |
| S11    | 6    | 7        | Ilm        |        | 54.80  |       | 43.11 | 2.09  |       |       |      |      |       |       |      |      |       |      |     |     |     |       |       |      |      |      | 100   | 103          |
| S11    | 6    | 8        | Chr        |        |        | 13.38 | 19.38 |       | 10.16 |       |      |      |       |       |      |      | 57.08 |      |     |     |     |       |       |      |      |      | 100   | 106          |
| S11    | 6    | 9        | Qz         | 100.00 |        |       |       |       |       |       |      |      |       |       |      |      |       |      |     |     |     |       |       |      |      |      | 100   | 117          |
| S11    | 6    | 10       | Spl        |        |        | 27.89 | 17.44 |       | 13.72 |       |      |      |       |       |      | 0.37 | 40.58 |      |     |     |     |       |       |      |      |      | 100   | 109          |

Table B6.1: EDS analyses of sample S11.

| Sample | Site | Position | Mineral | SiO2   | TiO2  | Al2O3 | FeO   | MnO   | MgO   | CaO   | Na2O  | K2O  | P2O5  | SO3  | F    | V2O5 | Cr2O3 | NiO  | CuO | ZnO | SrO | ZrO2  | Nb2O5 | SnO2 | HfO2 | WO3  | Total | Actual Total |
|--------|------|----------|---------|--------|-------|-------|-------|-------|-------|-------|-------|------|-------|------|------|------|-------|------|-----|-----|-----|-------|-------|------|------|------|-------|--------------|
| S11    | 6    | 11       | Chr     |        |       | 28.64 | 16.42 |       | 13.92 |       |       |      |       |      |      | 0.39 | 40.63 |      |     |     |     |       |       |      |      |      | 100   | 110          |
| S11    | 6    | 12       | Chl     | 26.43  |       | 19.82 | 24.59 |       | 13.66 |       |       |      |       |      |      |      | 0.50  |      |     |     |     |       |       |      |      |      | 85    | 99           |
| S11    | 6    | 13       | Grt     | 39.74  |       | 20.93 | 31.54 | 1.73  | 3.18  | 2.88  |       |      |       |      |      |      |       |      |     |     |     |       |       |      |      |      | 100   | 113          |
| S11    | 6    | 14       | "Mag" + | 2.08   |       | 0.58  | 92.88 |       |       |       |       |      | 0.94  |      |      |      | 0.50  |      |     |     |     |       |       |      |      | 3.02 | 100   | 88           |
| S11    | 6    | 15       | Qz      | 99.73  |       |       | 0.27  |       |       |       |       |      |       |      |      |      |       |      |     |     |     |       |       |      |      |      | 100   | 120          |
| S11    | 6    | 16       | Grt     | 39.31  |       | 21.20 | 33.73 | 0.59  | 3.98  | 1.19  |       |      |       |      |      |      |       |      |     |     |     |       |       |      |      |      | 100   | 112          |
| S11    | 6    | 17       | Tur     | 37.71  | 1.31  | 30.37 | 8.02  |       | 6.37  | 0.81  | 2.40  |      |       |      |      |      |       |      |     |     |     |       |       |      |      |      | 87    | 97           |
| S11    | 6    | 18       | Grt     | 39.39  |       | 1.35  | 25.50 |       |       | 33.76 |       |      |       |      |      |      |       |      |     |     |     |       |       |      |      |      | 100   | 109          |
| S11    | 6    | 19       | Zrn     | 31.08  |       |       |       |       |       |       |       |      |       |      |      |      |       |      |     |     |     | 67.60 |       |      | 1.32 |      | 100   | 124          |
| S11    | 6    | 20       | Cpx     | 53.12  | 0.87  | 2.52  | 9.40  | 0.26  | 16.18 | 17.05 | 0.34  |      |       |      |      |      | 0.26  |      |     |     |     |       |       |      |      |      | 100   | 119          |
| S11    | 6    | 21       | Grt     | 53.54  | 0.49  | 2.87  | 4.86  |       | 16.76 | 21.47 |       |      |       |      |      |      |       |      |     |     |     |       |       |      |      |      | 100   | 119          |
| S11    | 6    | 22       | Spl     |        |       | 26.16 | 15.13 |       | 14.38 |       |       |      |       |      |      |      | 44.33 |      |     |     |     |       |       |      |      |      | 100   | 113          |
| S11    | 6    | 23       | Grt     | 39.81  |       | 21.11 | 25.81 | 3.14  | 2.25  | 7.88  |       |      |       |      |      |      |       |      |     |     |     |       |       |      |      |      | 100   | 117          |
| S11    | 6    | 24       | Chr     |        |       | 17.63 | 19.10 |       | 12.18 |       |       |      |       |      |      |      | 51.08 |      |     |     |     |       |       |      |      |      | 100   | 112          |
| S11    | 6    | 25       | "Ilm"   |        | 64.08 |       | 33.87 | 2.06  |       |       |       |      |       |      |      |      |       |      |     |     |     |       |       |      |      |      | 100   | 103          |
| S11    | 6    | 26       | Chl +   | 28.66  | 0.56  | 18.54 | 30.06 |       | 0.91  | 0.63  |       | 1.08 | 1.10  |      |      |      |       |      |     |     |     |       |       |      |      | 3.47 | 85    | 87           |
| S11    | 6.2  | 1        | Chl     | 25.26  | 0.71  | 20.93 | 26.65 | 0.60  | 10.36 | 0.48  |       |      |       |      |      |      |       |      |     |     |     |       |       |      |      |      | 85    | 98           |
| S11    | 6.2  | 2        | Qz      | 100.00 |       |       |       |       |       |       |       |      |       |      |      |      |       |      |     |     |     |       |       |      |      |      | 100   | 121          |
| S11    | 6.2  | 3        | Mix     | 48.76  |       | 8.42  | 19.35 |       | 20.00 | 2.09  | 0.96  | 0.42 |       |      |      |      |       |      |     |     |     |       |       |      |      |      | 100   | 86           |
| S11    | 6.2  | 4        | Ttn     | 32.57  | 35.44 | 3.07  | 0.48  |       |       | 27.03 |       |      |       |      | 1.41 |      |       |      |     |     |     |       |       |      |      |      | 100   | 111          |
| S11    | 6.3  | 1        | TiO2    |        | 99.60 |       | 0.40  |       |       |       |       |      |       |      |      |      |       |      |     |     |     |       |       |      |      |      | 100   | 106          |
| S11    | 6.3  | 2        | Ms +    | 45.79  | 8.64  | 27.05 | 2.80  |       | 2.83  |       | 1.12  | 6.76 |       |      |      |      |       |      |     |     |     |       |       |      |      |      | 95    | 109          |
| S11    | 6.3  | 3        | "Mag" + | 3.96   | 0.64  | 1.78  | 91.54 |       | 0.58  |       |       |      | 1.49  |      |      |      |       |      |     |     |     |       |       |      |      |      | 100   | 86           |
| S11    | 7    | 1        | Ap +    | 12.62  |       | 6.08  | 2.22  |       | 0.66  | 38.03 | 0.55  | 0.73 | 32.61 |      | 6.50 |      |       |      |     |     |     |       |       |      |      |      | 100   | 108          |
| S11    | 7    | 2        | Grt     | 40.25  |       | 21.31 | 25.26 | 0.81  | 4.25  | 8.12  |       |      |       |      |      |      |       |      |     |     |     |       |       |      |      |      | 100   | 110          |
| S11    | 7    | 3        | Chr     |        |       | 12.41 | 23.07 |       | 8.36  |       |       |      |       |      |      |      | 56.16 |      |     |     |     |       |       |      |      |      | 100   | 107          |
| S11    | 7    | 4        | Grt     | 39.67  |       | 21.19 | 26.89 | 3.54  | 1.03  | 7.68  |       |      |       |      |      |      |       |      |     |     |     |       |       |      |      |      | 100   | 112          |
| S11    | 7    | 5        | Ep      | 40.16  |       | 24.56 | 9.81  |       |       | 22.47 |       |      |       |      |      |      |       |      |     |     |     |       |       |      |      |      | 97    | 108          |
| S11    | 7    | 6        | Ap      |        |       |       | 0.49  | 0.24  |       | 46.71 | 1.44  |      | 38.94 | 0.92 | 8.23 |      |       |      |     |     |     |       |       |      |      | 3.03 | 100   | 108          |
| S11    | 7    | 7        | Feohy   |        | 10.34 | 2.49  | 83.53 | 1.92  | 1.73  |       |       |      |       |      |      |      |       |      |     |     |     |       |       |      |      |      | 100   | 100          |
| S11    | 7    | 8        | Dol     |        |       |       |       |       | 22.62 | 31.38 |       |      |       |      |      |      |       |      |     |     |     |       |       |      |      |      | 54    | 56           |
| S11    | 7    | 9        | "Chr"   |        | 1.34  | 2.77  | 75.84 |       | 2.57  |       |       |      |       |      |      |      | 16.69 | 0.79 |     |     |     |       |       |      |      |      | 100   | 103          |
| S11    | 7    | 10       | Grt     | 39.97  |       | 20.70 | 21.44 | 8.08  | 1.25  | 8.57  |       |      |       |      |      |      |       |      |     |     |     |       |       |      |      |      | 100   | 115          |
| S11    | 7    | 11       | Grt     | 39.82  |       | 21.08 | 32.23 | 1.12  | 3.48  | 2.28  |       |      |       |      |      |      |       |      |     |     |     |       |       |      |      |      | 100   | 114          |
| S11    | 7.2  | 1        | Ab      | 69.18  |       | 18.84 |       |       |       | 0.26  | 11.72 |      |       |      |      |      |       |      |     |     |     |       |       |      |      |      | 100   | 118          |
| S11    | 7.2  | 2        | Ilm     | 0.51   | 50.71 |       | 26.33 | 21.42 |       | 1.04  |       |      |       |      |      |      |       |      |     |     |     |       |       |      |      |      | 100   | 105          |
| S11    | 7.2  | 3        | Ttn     | 33.97  | 34.48 | 2.19  | 1.87  |       |       | 27.49 |       |      |       |      |      |      |       |      |     |     |     |       |       |      |      |      | 100   | 109          |
| S11    | 7.2  | 4        | Chl     | 30.12  | 0.42  | 16.85 | 19.06 | 0.85  | 16.46 | 0.71  | 0.54  |      |       |      |      |      |       |      |     |     |     |       |       |      |      |      | 85    | 102          |
| S11    | 7.3  | 1        | Grt     | 39.13  |       | 20.93 | 34.24 | 1.29  | 2.64  | 1.77  |       |      |       |      |      |      |       |      |     |     |     |       |       |      |      |      | 100   | 113          |
| S11    | 7.3  | 2        | Chl     | 27.07  |       | 20.92 | 19.25 |       | 17.76 |       |       |      |       |      |      |      |       |      |     |     |     |       |       |      |      |      | 85    | 98           |
| S11    | 7.3  | 3        | Qz      | 99.34  |       |       | 0.66  |       |       |       |       |      |       |      |      |      |       |      |     |     |     |       |       |      |      |      | 100   | 122          |
| S11    | 8    | 1        | Ap      |        |       |       | 0.87  |       |       | 44.15 | 1.50  |      | 38.39 | 2.36 | 9.19 |      |       |      |     |     |     |       |       |      |      | 3.54 | 100   | 107          |
| S11    | 8    | 2        | ? Ilm + | 20.20  | 47.18 | 10.74 | 18.22 | 0.43  | 2.02  | 1.21  |       |      |       |      |      |      |       |      |     |     |     |       |       |      |      |      | 100   | 101          |
| S11    | 8    | 3        | Grt     | 39.55  |       | 20.98 | 28.17 | 5.68  | 2.48  | 3.14  |       |      |       |      |      |      |       |      |     |     |     |       |       |      |      |      | 100   | 110          |
| S11    | 8    | 4        | Ep      | 41.62  |       | 25.93 | 2.37  | 0.39  | 3.96  | 22.74 |       |      |       |      |      |      |       |      |     |     |     |       |       |      |      |      | 97    | 104          |
| S11    | 8    | 5        | Ep      | 40.12  |       | 23.94 | 10.49 | 1.33  |       | 21.12 |       |      |       |      |      |      |       |      |     |     |     |       |       |      |      |      | 97    | 104          |
| S11    | 8    | 6        | St      | 28.43  | 0.40  | 54.55 | 12.60 | 0.38  | 1.64  |       |       |      |       |      |      |      |       |      |     |     |     |       |       |      |      |      | 98    | 109          |
| S11    | 8    | 7        | Chl     | 26.17  |       | 20.16 | 26.92 |       | 11.75 |       |       |      |       |      |      |      |       |      |     |     |     |       |       |      |      |      | 85    | 95           |
| S11    | 8    | 8        | Spl     |        | 0.60  | 25.92 | 18.41 |       | 15.03 |       |       |      |       |      |      |      | 40.04 |      |     |     |     |       |       |      |      |      | 100   | 109          |
| S11    | 8    | 9        | Chr     |        |       | 18.22 | 19.12 |       | 10.97 |       |       |      |       |      |      |      | 51.69 |      |     |     |     |       |       |      |      |      | 100   | 110          |



Table B6.1: EDS analyses of sample S11.

| Sample | Site | Position | Mineral | SiO2   | TiO2   | Al2O3 | FeO   | MnO  | MgO   | CaO   | Na2O | K2O   | P2O5  | SO3  | F    | V2O5 | Cr2O3 | NiO  | CuO | ZnO | SrO | ZrO2 | Nb2O5 | SnO2 | HfO2 | WO3  | Total | Actual Total |
|--------|------|----------|---------|--------|--------|-------|-------|------|-------|-------|------|-------|-------|------|------|------|-------|------|-----|-----|-----|------|-------|------|------|------|-------|--------------|
| S11    | 8    | 10       | TiO2    |        | 100.00 |       |       |      |       |       |      |       |       |      |      |      |       |      |     |     |     |      |       |      |      |      | 100   | 109          |
| S11    | 8    | 11       | Ms +    | 50.76  | 1.71   | 28.50 | 1.38  |      | 2.40  |       | 0.62 | 9.63  |       |      |      |      |       |      |     |     |     |      |       |      |      |      | 95    | 112          |
| S11    | 8    | 12       | Grt     | 39.92  |        | 21.05 | 30.58 | 0.87 | 5.87  | 1.71  |      |       |       |      |      |      |       |      |     |     |     |      |       |      |      |      | 100   | 117          |
| S11    | 8    | 13       | Ep      | 39.96  |        | 24.12 | 10.27 |      |       | 22.64 |      |       |       |      |      |      |       |      |     |     |     |      |       |      |      |      | 97    | 112          |
| S11    | 8    | 14       | Feohy + | 2.39   | 0.98   | 3.94  | 87.59 | 0.64 |       | 0.43  |      |       | 2.22  |      |      |      |       |      |     |     |     |      |       |      |      | 1.82 | 100   | 90           |
| S11    | 8    | 15       | Grt +   | 39.13  | 0.86   | 25.37 | 26.67 |      | 0.97  | 0.47  | 1.58 | 1.14  | 1.22  |      |      |      |       |      |     |     |     |      |       |      |      | 2.59 | 100   | 99           |
| S11    | 8    | 16       | Chl     | 28.80  |        | 18.81 | 25.92 |      | 10.98 |       | 0.48 |       |       |      |      |      |       |      |     |     |     |      |       |      |      |      | 85    | 90           |
| S11    | 8    | 17       | "Mag"   | 3.11   |        |       | 96.43 | 0.45 |       |       |      |       |       |      |      |      |       |      |     |     |     |      |       |      |      |      | 100   | 77           |
| S11    | 8    | 18       | Cpx     | 54.61  | 0.29   | 1.80  | 4.15  |      | 17.81 | 20.85 |      |       |       |      |      |      | 0.48  |      |     |     |     |      |       |      |      |      | 100   | 112          |
| S11    | 8.2  | 1        | Kln +   | 51.71  | 0.40   | 30.40 | 10.74 |      | 1.13  | 0.34  | 0.53 | 1.22  |       |      |      |      |       |      |     |     |     |      |       |      |      | 3.53 | 100   | 83           |
| S11    | 8.2  | 2        | Qz      | 100.00 |        |       |       |      |       |       |      |       |       |      |      |      |       |      |     |     |     |      |       |      |      |      | 100   | 102          |
| S11    | 8.3  | 1        | Chl     | 26.58  |        | 19.45 | 26.38 |      | 12.59 |       |      |       |       |      |      |      |       |      |     |     |     |      |       |      |      |      | 85    | 98           |
| S11    | 8.3  | 2        | Chl     | 25.41  |        | 19.03 | 28.52 | 0.25 | 11.79 |       |      |       |       |      |      |      |       |      |     |     |     |      |       |      |      |      | 85    | 98           |
| S11    | 8.3  | 3        | Chl     | 26.34  |        | 19.89 | 26.21 |      | 12.14 |       | 0.42 |       |       |      |      |      |       |      |     |     |     |      |       |      |      |      | 85    | 100          |
| S11    | 8.4  | 1        | Qz      | 100.00 |        |       |       |      |       |       |      |       |       |      |      |      |       |      |     |     |     |      |       |      |      |      | 100   | 120          |
| S11    | 8.4  | 2        | TiO2    |        | 99.59  |       | 0.41  |      |       |       |      |       |       |      |      |      |       |      |     |     |     |      |       |      |      |      | 100   | 108          |
| S11    | 8.4  | 3        | Grt     | 38.12  | 0.85   | 18.41 | 28.24 | 0.64 | 12.24 | 0.47  | 0.52 | 0.50  |       |      |      |      |       |      |     |     |     |      |       |      |      |      | 100   | 98           |
| S11    | 9    | 1        | Grt     | 39.75  |        | 20.92 | 24.95 | 1.27 | 0.39  | 12.72 |      |       |       |      |      |      |       |      |     |     |     |      |       |      |      |      | 100   | 110          |
| S11    | 9    | 2        | Grt     | 39.53  |        | 20.98 | 28.17 | 0.72 | 1.53  | 9.07  |      |       |       |      |      |      |       |      |     |     |     |      |       |      |      |      | 100   | 112          |
| S11    | 9    | 3        | Chr     |        |        | 20.98 | 19.80 |      | 10.91 |       |      |       |       |      |      | 0.37 | 47.94 |      |     |     |     |      |       |      |      |      | 100   | 106          |
| S11    | 9    | 4        | Ttn     | 32.65  | 38.37  | 0.78  | 0.42  |      |       | 27.78 |      |       |       |      |      |      |       |      |     |     |     |      |       |      |      |      | 100   | 109          |
| S11    | 9    | 5        | Ap      |        |        |       |       |      |       | 49.58 |      | 44.78 |       |      | 5.63 |      |       |      |     |     |     |      |       |      |      |      | 100   | 123          |
| S11    | 9    | 6        | Dol     |        |        |       |       |      | 22.58 | 31.42 |      |       |       |      |      |      |       |      |     |     |     |      |       |      |      |      | 54    | 57           |
| S11    | 9    | 7        | Chr     |        |        | 15.37 | 19.28 |      | 11.01 |       |      |       |       |      |      | 0.39 | 53.95 |      |     |     |     |      |       |      |      |      | 100   | 111          |
| S11    | 9    | 8        | TiO2    |        | 99.47  |       | 0.53  |      |       |       |      |       |       |      |      |      |       |      |     |     |     |      |       |      |      |      | 100   | 110          |
| S11    | 9    | 9        | Ilm     |        | 50.12  |       | 47.41 | 2.48 |       |       |      |       |       |      |      |      |       |      |     |     |     |      |       |      |      |      | 100   | 106          |
| S11    | 9    | 10       | Spl     |        | 0.37   | 30.06 | 15.06 |      | 15.20 |       |      |       |       |      |      |      | 39.32 |      |     |     |     |      |       |      |      |      | 100   | 109          |
| S11    | 9    | 11       | Chr     |        |        | 17.11 | 18.92 |      | 13.29 |       |      |       |       |      |      |      | 50.68 |      |     |     |     |      |       |      |      |      | 100   | 107          |
| S11    | 9    | 12       | Spl     |        |        | 31.19 | 15.58 |      | 15.11 |       |      |       |       |      |      |      | 38.13 |      |     |     |     |      |       |      |      |      | 100   | 109          |
| S11    | 9    | 13       | Ms      | 48.60  |        | 28.73 | 6.17  |      | 0.98  |       | 0.40 | 10.13 |       |      |      |      |       |      |     |     |     |      |       |      |      |      | 95    | 103          |
| S11    | 9    | 14       | Ap      |        |        |       |       |      |       | 45.82 | 1.44 |       | 36.49 | 1.45 | 9.52 |      |       |      |     |     |     |      |       |      |      | 5.27 | 100   | 108          |
| S11    | 9    | 15       | Grt     | 39.31  |        | 20.68 | 29.42 | 5.94 | 2.99  | 1.66  |      |       |       |      |      |      |       |      |     |     |     |      |       |      |      |      | 100   | 115          |
| S11    | 9    | 16       | Grt     | 41.58  |        | 20.89 | 3.32  |      |       | 34.20 |      |       |       |      |      |      |       |      |     |     |     |      |       |      |      |      | 100   | 115          |
| S11    | 9    | 17       | Dol     |        |        |       |       |      | 22.62 | 31.38 |      |       |       |      |      |      |       |      |     |     |     |      |       |      |      |      | 54    | 58           |
| S11    | 9    | 18       | Chr     |        |        | 8.93  | 26.08 |      | 7.00  |       |      |       |       |      |      |      | 57.99 |      |     |     |     |      |       |      |      |      | 100   | 108          |
| S11    | 9    | 19       | Ep      | 40.70  |        | 25.81 | 9.13  |      |       | 21.36 |      |       |       |      |      |      |       |      |     |     |     |      |       |      |      |      | 97    | 111          |
| S11    | 9    | 20       | Chl     | 25.44  |        | 19.83 | 28.28 |      | 10.98 |       | 0.47 |       |       |      |      |      |       |      |     |     |     |      |       |      |      |      | 85    | 97           |
| S11    | 9.2  | 1        | Ol      | 41.19  |        |       | 6.75  |      | 50.48 |       |      |       |       |      |      |      | 1.16  | 0.42 |     |     |     |      |       |      |      |      | 100   | 120          |
| S11    | 9.2  | 2        | Chr     |        |        | 20.76 | 19.24 |      | 11.55 |       |      |       |       |      |      |      | 48.45 |      |     |     |     |      |       |      |      |      | 100   | 109          |
| S11    | 9.2  | 3        | Mix     | 38.94  |        | 16.10 | 2.80  |      | 38.41 |       |      |       |       |      |      |      | 3.75  |      |     |     |     |      |       |      |      |      | 100   | 101          |
| S11    | 9.2  | 4        | Chr     |        | 0.39   | 6.19  | 29.63 |      | 6.46  |       |      |       |       |      |      |      | 57.32 |      |     |     |     |      |       |      |      |      | 100   | 106          |
| S11    | 9.2  | 5        | Chr     |        |        | 11.24 | 28.49 |      | 7.71  |       |      |       |       |      |      |      | 52.57 |      |     |     |     |      |       |      |      |      | 100   | 107          |
| S11    | 10   | 1        | Grt     | 39.48  |        | 20.94 | 31.78 | 3.52 | 3.01  | 1.27  |      |       |       |      |      |      |       |      |     |     |     |      |       |      |      |      | 100   | 111          |
| S11    | 10   | 2        | Ilm     |        | 51.88  |       | 46.55 | 0.81 | 0.76  |       |      |       |       |      |      |      |       |      |     |     |     |      |       |      |      |      | 100   | 103          |
| S11    | 10   | 3        | Qz      | 100.00 |        |       |       |      |       |       |      |       |       |      |      |      |       |      |     |     |     |      |       |      |      |      | 100   | 117          |
| S11    | 10   | 4        | Grt     | 39.76  |        | 20.95 | 31.30 | 2.00 | 4.64  | 1.35  |      |       |       |      |      |      |       |      |     |     |     |      |       |      |      |      | 100   | 109          |
| S11    | 10   | 5        | ?Tur    | 38.51  | 0.77   | 30.68 | 5.86  |      | 8.04  | 0.50  | 2.63 |       |       |      |      |      |       |      |     |     |     |      |       |      |      |      | 87    | 96           |
| S11    | 10   | 6        | Ttn     | 33.20  | 37.89  | 0.96  |       |      |       | 27.95 |      |       |       |      |      |      |       |      |     |     |     |      |       |      |      |      | 100   | 109          |
| S11    | 10   | 7        | Grt     | 41.75  |        | 21.40 | 2.60  |      |       | 34.25 |      |       |       |      |      |      |       |      |     |     |     |      |       |      |      |      | 100   | 111          |
| S11    | 10   | 8        | Grt     | 40.75  |        | 21.66 | 26.61 | 0.73 | 9.23  | 1.02  |      |       |       |      |      |      |       |      |     |     |     |      |       |      |      |      | 100   | 115          |

Table B6.1: EDS analyses of sample S11.

| Sample | Site | Position | Mineral | SiO2  | TiO2  | Al2O3 | FeO   | MnO  | MgO   | CaO   | Na2O | K2O  | P2O5  | SO3  | F     | V2O5 | Cr2O3 | NiO | CuO | ZnO | SrO | ZrO2  | Nb2O5 | SnO2 | HfO2 | WO3  | Total | Actual Total |
|--------|------|----------|---------|-------|-------|-------|-------|------|-------|-------|------|------|-------|------|-------|------|-------|-----|-----|-----|-----|-------|-------|------|------|------|-------|--------------|
| S11    | 10   | 9        | ?       | 40.21 |       | 20.27 | 20.42 | 2.99 |       | 16.10 |      |      |       |      |       |      |       |     |     |     |     |       |       |      |      |      | 100   | 116          |
| S11    | 10   | 10       | Ep      | 40.47 |       | 27.23 | 6.54  |      |       | 22.75 |      |      |       |      |       |      |       |     |     |     |     |       |       |      |      |      | 97    | 114          |
| S11    | 10   | 11       | Ap      |       |       |       |       |      |       | 48.47 |      |      | 44.76 |      | 5.19  |      |       |     |     |     |     |       |       |      |      | 1.59 | 100   | 127          |
| S11    | 10   | 12       | Chl     | 26.53 | 0.65  | 19.03 | 31.10 |      | 0.61  | 0.52  | 0.71 | 0.74 | 1.20  |      |       |      |       |     |     |     |     |       |       |      |      | 3.92 | 85    | 91           |
| S11    | 10   | 13       | Feohy   |       | 13.25 | 2.17  | 81.00 | 2.16 | 1.43  |       |      |      |       |      |       |      |       |     |     |     |     |       |       |      |      |      | 100   | 101          |
| S11    | 10   | 14       | Ilm     |       | 54.63 |       | 43.82 | 1.01 | 0.55  |       |      |      |       |      |       |      |       |     |     |     |     |       |       |      |      |      | 100   | 106          |
| S11    | 10   | 15       | Ilm     |       | 49.95 |       | 48.74 | 1.31 |       |       |      |      |       |      |       |      |       |     |     |     |     |       |       |      |      |      | 100   | 105          |
| S11    | 10   | 16       | "Mag" + | 2.45  | 0.71  |       | 92.41 |      |       | 0.52  |      |      | 2.36  |      |       |      |       |     |     |     |     |       | 1.56  |      |      |      | 100   | 87           |
| S11    | 10   | 17       | Ttn     | 33.12 | 36.67 | 2.19  | 0.32  |      |       | 27.70 |      |      |       |      |       |      |       |     |     |     |     |       |       |      |      |      | 100   | 111          |
| S11    | 10   | 18       | Grt     | 41.45 |       | 22.55 |       |      |       | 36.00 |      |      |       |      |       |      |       |     |     |     |     |       |       |      |      |      | 100   | 114          |
| S11    | 10   | 19       | "Mag" + | 4.42  |       | 0.90  | 92.92 |      |       | 0.48  |      |      | 1.28  |      |       |      |       |     |     |     |     |       |       |      |      |      | 100   | 86           |
| S11    | 10.2 | 1        | Qz      | 99.61 |       |       | 0.39  |      |       |       |      |      |       |      |       |      |       |     |     |     |     |       |       |      |      |      | 100   | 119          |
| S11    | 10.2 | 2        | Grt     | 39.80 |       | 21.33 | 27.81 | 2.44 | 1.56  | 7.06  |      |      |       |      |       |      |       |     |     |     |     |       |       |      |      |      | 100   | 112          |
| S11    | 11   | 1        | TiO2    |       | 98.81 |       | 1.19  |      |       |       |      |      |       |      |       |      |       |     |     |     |     |       |       |      |      |      | 100   | 105          |
| S11    | 11   | 2        | Chr     |       | 0.35  | 24.75 | 29.12 |      | 9.25  |       |      |      |       |      |       |      | 36.53 |     |     |     |     |       |       |      |      |      | 100   | 106          |
| S11    | 11   | 3        | Grt     | 39.75 |       | 21.24 | 29.39 | 0.56 | 1.73  | 7.33  |      |      |       |      |       |      |       |     |     |     |     |       |       |      |      |      | 100   | 111          |
| S11    | 11   | 4        | Grt     | 40.01 |       | 21.00 | 28.26 | 1.50 | 3.10  | 6.14  |      |      |       |      |       |      |       |     |     |     |     |       |       |      |      |      | 100   | 112          |
| S11    | 11   | 5        | TiO2    |       | 96.17 |       | 1.10  |      |       |       |      |      |       |      |       |      |       |     |     |     |     | 2.74  |       |      |      |      | 100   | 106          |
| S11    | 11   | 6        | Fl      |       |       |       |       |      |       | 50.65 |      |      |       |      | 49.35 |      |       |     |     |     |     |       |       |      |      |      | 100   | 117          |
| S11    | 11   | 7        | Feohy   |       | 10.57 | 2.46  | 83.18 | 1.96 | 1.84  |       |      |      |       |      |       |      |       |     |     |     |     |       |       |      |      |      | 100   | 99           |
| S11    | 11   | 8        | Spl     |       |       | 27.48 | 16.60 |      | 11.64 |       |      |      |       |      |       |      | 44.28 |     |     |     |     |       |       |      |      |      | 100   | 108          |
| S11    | 11   | 9        | Ep      | 40.76 |       | 27.81 | 5.86  |      |       | 22.57 |      |      |       |      |       |      |       |     |     |     |     |       |       |      |      |      | 97    | 111          |
| S11    | 11   | 10       | Ep      | 39.87 |       | 22.85 | 11.66 |      |       | 22.62 |      |      |       |      |       |      |       |     |     |     |     |       |       |      |      |      | 97    | 111          |
| S11    | 11   | 11       | Spl     |       | 0.35  | 27.68 | 22.32 |      | 11.37 |       |      |      |       |      |       |      | 38.27 |     |     |     |     |       |       |      |      |      | 100   | 105          |
| S11    | 11   | 12       | Cpx     | 51.21 | 0.62  | 4.06  | 8.21  | 0.44 | 13.06 | 21.88 | 0.52 |      |       |      |       |      |       |     |     |     |     |       |       |      |      |      | 100   | 113          |
| S11    | 11   | 13       | Chl     | 26.59 | 0.37  | 20.24 | 22.97 |      | 14.81 |       |      |      |       |      |       |      |       |     |     |     |     |       |       |      |      |      | 85    | 96           |
| S11    | 11   | 14       | Grt     | 39.20 |       | 20.85 | 34.97 | 1.64 | 2.06  | 1.29  |      |      |       |      |       |      |       |     |     |     |     |       |       |      |      |      | 100   | 111          |
| S11    | 11   | 15       | Feohy   |       | 12.23 | 7.11  | 74.16 | 0.46 | 6.03  |       |      |      |       |      |       |      |       |     |     |     |     |       |       |      |      |      | 100   | 100          |
| S11    | 11   | 16       | Chr     |       |       | 22.48 | 17.25 |      | 13.31 |       |      |      |       |      |       |      | 46.96 |     |     |     |     |       |       |      |      |      | 100   | 109          |
| S11    | 11   | 17       | Grt     | 39.90 | 1.20  | 8.15  | 16.96 | 0.72 |       | 33.07 |      |      |       |      |       |      |       |     |     |     |     |       |       |      |      |      | 100   | 111          |
| S11    | 11   | 18       | Chr     |       |       | 5.46  | 22.01 |      | 9.13  |       |      |      |       |      |       |      | 63.40 |     |     |     |     |       |       |      |      |      | 100   | 111          |
| S11    | 11   | 19       | Chr     |       |       | 20.61 | 22.42 |      | 10.08 |       |      |      |       |      |       |      | 46.90 |     |     |     |     |       |       |      |      |      | 100   | 111          |
| S11    | 11.2 | 1        | Qz+     | 93.62 | 0.34  | 3.42  | 0.28  |      |       | 0.48  | 1.86 |      |       |      |       |      |       |     |     |     |     |       |       |      |      |      | 100   | 117          |
| S11    | 11.2 | 2        | Ep      | 39.98 | 0.64  | 24.48 | 9.63  | 0.26 |       | 22.00 |      |      |       |      |       |      |       |     |     |     |     |       |       |      |      |      | 97    | 110          |
| S11    | 11.2 | 3        | "Ilm"   | 0.50  | 68.48 |       | 24.84 | 5.63 |       | 0.56  |      |      |       |      |       |      |       |     |     |     |     |       |       |      |      |      | 100   | 102          |
| S11    | 12   | 1        | Dol     |       |       |       |       |      | 22.63 | 31.37 |      |      |       |      |       |      |       |     |     |     |     |       |       |      |      |      | 54    | 57           |
| S11    | 12   | 2        | Chr     |       |       | 9.97  | 23.83 |      | 9.26  |       |      |      |       |      |       |      | 56.95 |     |     |     |     |       |       |      |      |      | 100   | 109          |
| S11    | 12   | 3        | Ilm     |       | 51.13 |       | 47.33 | 1.54 |       |       |      |      |       |      |       |      |       |     |     |     |     |       |       |      |      |      | 100   | 107          |
| S11    | 12   | 4        | Ilm     |       | 52.33 |       | 46.70 | 0.96 |       |       |      |      |       |      |       |      |       |     |     |     |     |       |       |      |      |      | 100   | 105          |
| S11    | 12   | 5        | Ap      |       |       |       |       |      |       | 47.51 | 1.49 |      | 38.29 | 1.93 | 7.98  |      |       |     |     |     |     |       |       |      |      | 2.80 | 100   | 109          |
| S11    | 12   | 6        | Grt     | 39.77 |       | 21.32 | 30.72 | 1.68 | 4.15  | 2.35  |      |      |       |      |       |      |       |     |     |     |     |       |       |      |      |      | 100   | 113          |
| S11    | 12   | 7        | Zrn     | 31.12 |       |       |       |      |       |       |      |      |       |      |       |      |       |     |     |     |     | 67.54 |       |      | 1.34 |      | 100   | 123          |
| S11    | 12   | 8        | "Ilm"   |       | 69.23 |       | 28.85 | 1.92 |       |       |      |      |       |      |       |      |       |     |     |     |     |       |       |      |      |      | 100   | 99           |
| S11    | 12   | 9        | Ap      |       |       |       |       |      |       | 48.95 |      |      | 44.51 |      | 5.11  |      |       |     |     |     |     |       |       |      |      | 1.44 | 100   | 124          |
| S11    | 12   | 10       | Ap +    |       |       | 0.47  | 3.73  | 0.38 |       | 41.87 | 0.74 |      | 36.90 |      | 8.42  |      |       |     |     |     |     |       |       |      |      | 7.49 | 100   | 97           |
| S11    | 12   | 11       | Grt     | 39.35 |       | 21.23 | 29.48 | 4.11 | 4.25  | 1.58  |      |      |       |      |       |      |       |     |     |     |     |       |       |      |      |      | 100   | 115          |
| S11    | 12   | 12       | Ep      | 39.93 |       | 22.40 | 12.11 |      |       | 22.56 |      |      |       |      |       |      |       |     |     |     |     |       |       |      |      |      | 97    | 109          |
| S11    | 12   | 13       | Ep      | 39.72 |       | 19.92 | 11.16 | 2.83 |       | 23.37 |      |      |       |      |       |      |       |     |     |     |     |       |       |      |      |      | 97    | 116          |
| S11    | 12   | 14       | Ilm     |       | 50.76 |       | 47.11 | 1.24 | 0.89  |       |      |      |       |      |       |      |       |     |     |     |     |       |       |      |      |      | 100   | 109          |
| S11    | 12   | 15       | Tur     | 39.14 | 0.69  | 30.98 | 2.98  |      | 9.88  | 0.57  | 2.76 |      |       |      |       |      |       |     |     |     |     |       |       |      |      |      | 87    | 101          |

Table B6.1: EDS analyses of sample S11.

| Sample | Site | Position | Mineral | SiO2   | TiO2  | Al2O3 | FeO   | MnO  | MgO   | CaO   | Na2O | K2O  | P2O5  | SO3  | F    | V2O5 | Cr2O3 | NiO | CuO | ZnO  | SrO  | ZrO2  | Nb2O5 | SnO2 | HfO2 | WO3  | Total | Actual Total |
|--------|------|----------|---------|--------|-------|-------|-------|------|-------|-------|------|------|-------|------|------|------|-------|-----|-----|------|------|-------|-------|------|------|------|-------|--------------|
| S11    | 12   | 16       | Chr +   | 7.37   | 1.62  | 3.69  | 31.25 | 4.23 | 9.22  | 0.63  |      |      | 1.21  |      |      |      | 33.20 |     |     | 1.56 |      |       |       |      |      | 6.03 | 100   | 68           |
| S11    | 12   | 17       | Ttn     | 32.55  | 37.41 | 0.49  | 0.76  |      |       | 27.68 |      |      |       |      |      | 1.10 |       |     |     |      |      |       |       |      |      |      | 100   | 113          |
| S11    | 12   | 18       | Grt     | 40.83  | 0.59  | 14.44 | 9.98  |      |       | 34.16 |      |      |       |      |      |      |       |     |     |      |      |       |       |      |      |      | 100   | 110          |
| S11    | 12   | 19       | Zrn     | 31.20  |       |       |       |      |       |       |      |      |       |      |      |      |       |     |     |      |      | 68.80 |       |      |      |      | 100   | 116          |
| S11    | 12   | 20       | Cpx     | 52.05  | 0.91  | 3.48  | 7.47  | 0.30 | 13.89 | 21.32 | 0.58 |      |       |      |      |      |       |     |     |      |      |       |       |      |      |      | 100   | 112          |
| S11    | 12.2 | 1        | Qz      | 99.43  |       |       | 0.22  |      |       | 0.34  |      |      |       |      |      |      |       |     |     |      |      |       |       |      |      |      | 100   | 120          |
| S11    | 12.2 | 2        | Ep      | 40.28  |       | 23.94 | 10.50 |      |       | 22.28 |      |      |       |      |      |      |       |     |     |      |      |       |       |      |      |      | 97    | 108          |
| S11    | 12.3 | 1        | TiO2    | 0.93   | 97.60 | 0.48  | 0.99  |      |       |       |      |      |       |      |      |      |       |     |     |      |      |       |       |      |      |      | 100   | 103          |
| S11    | 12.3 | 2        | Qz +    | 95.31  | 1.03  | 2.13  | 0.30  |      | 0.32  |       |      | 0.93 |       |      |      |      |       |     |     |      |      |       |       |      |      |      | 100   | 120          |
| S11    | 13   | 1        | Mix     | 19.29  | 1.17  | 8.72  | 59.39 | 0.99 | 5.25  | 0.68  | 1.24 |      | 0.98  |      |      |      |       |     |     |      |      |       |       |      |      | 2.27 | 100   | 84           |
| S11    | 13   | 2        | Grt     | 39.77  |       | 21.02 | 28.00 | 2.93 | 5.08  | 3.19  |      |      |       |      |      |      |       |     |     |      |      |       |       |      |      |      | 100   | 111          |
| S11    | 13   | 3        | Spl     |        |       | 31.75 | 16.11 |      | 15.22 |       |      |      |       |      |      |      | 36.92 |     |     |      |      |       |       |      |      |      | 100   | 108          |
| S11    | 13   | 4        | Chr     |        |       | 13.90 | 18.87 |      | 10.38 |       |      |      |       |      |      | 0.41 | 56.45 |     |     |      |      |       |       |      |      |      | 100   | 106          |
| S11    | 13   | 5        | Ap +    |        |       |       | 1.40  |      |       | 45.06 | 1.64 |      | 37.53 | 2.31 | 8.61 |      |       |     |     |      |      |       |       |      |      | 3.45 | 100   | 102          |
| S11    | 13   | 6        | Ap +    | 1.42   |       |       | 1.27  |      |       | 44.67 | 1.05 |      | 38.47 | 1.05 | 7.94 |      |       |     |     |      | 3.57 |       |       |      |      | 0.56 | 100   | 112          |
| S11    | 13   | 7        | Chl     | 26.92  |       | 21.39 | 18.88 |      | 17.81 |       |      |      |       |      |      |      |       |     |     |      |      |       |       |      |      |      | 85    | 98           |
| S11    | 13   | 8        | Ap      |        |       | 0.82  | 0.38  |      |       | 49.06 | 0.51 |      | 41.07 | 1.11 | 7.05 |      |       |     |     |      |      |       |       |      |      |      | 100   | 115          |
| S11    | 13   | 9        | "Mag" + | 3.58   | 0.61  | 1.63  | 90.50 | 0.46 |       | 0.41  |      |      | 2.13  |      |      |      | 0.67  |     |     |      |      |       |       |      |      |      | 100   | 85           |
| S11    | 13   | 10       | Chr     |        |       | 26.21 | 13.39 |      | 16.64 |       |      |      |       |      |      |      | 43.76 |     |     |      |      |       |       |      |      |      | 100   | 111          |
| S11    | 13   | 11       | Grt     | 41.88  |       | 21.38 | 1.56  |      |       | 35.18 |      |      |       |      |      |      |       |     |     |      |      |       |       |      |      |      | 100   | 115          |
| S11    | 13   | 12       | Grt     | 42.12  |       | 21.68 | 0.97  |      |       | 35.23 |      |      |       |      |      |      |       |     |     |      |      |       |       |      |      |      | 100   | 114          |
| S11    | 13   | 13       | Spl     |        |       | 38.68 | 16.71 |      | 16.28 |       |      |      |       |      |      |      | 28.33 |     |     |      |      |       |       |      |      |      | 100   | 111          |
| S11    | 13   | 14       | Feohy + | 1.97   | 0.55  |       | 78.73 | 1.41 | 1.83  |       |      |      |       |      |      |      | 15.51 |     |     |      |      |       |       |      |      |      | 100   | 101          |
| S11    | 13   | 15       | Ilm     |        | 52.78 |       | 44.57 | 2.65 |       |       |      |      |       |      |      |      |       |     |     |      |      |       |       |      |      |      | 100   | 109          |
| S11    | 13   | 16       | Chr     |        |       | 14.40 | 17.88 |      | 11.46 |       |      |      |       |      |      | 0.40 | 55.87 |     |     |      |      |       |       |      |      |      | 100   | 108          |
| S11    | 13   | 17       | Ep      | 40.42  |       | 28.03 | 5.51  |      |       | 23.04 |      |      |       |      |      |      |       |     |     |      |      |       |       |      |      |      | 97    | 111          |
| S11    | 13   | 18       | Chr     |        | 0.39  | 23.42 | 26.56 |      | 11.07 |       |      |      |       |      |      | 0.44 | 38.12 |     |     |      |      |       |       |      |      |      | 100   | 109          |
| S11    | 13   | 19       | Chr     |        |       | 25.16 | 16.56 |      | 14.07 |       |      |      |       |      |      | 0.36 | 43.85 |     |     |      |      |       |       |      |      |      | 100   | 110          |
| S11    | 13.2 | 1        | Qz      | 98.05  |       | 0.84  | 0.86  |      |       |       |      | 0.25 |       |      |      |      |       |     |     |      |      |       |       |      |      |      | 100   | 119          |
| S11    | 13.2 | 2        | Ap      |        |       |       | 0.50  |      |       | 48.58 |      |      | 44.74 |      | 6.18 |      |       |     |     |      |      |       |       |      |      |      | 100   | 121          |
| S11    | 13.2 | 3        | Mix     | 38.32  | 13.72 |       | 47.60 |      |       | 0.36  |      |      |       |      |      |      |       |     |     |      |      |       |       |      |      |      | 100   | 113          |
| S11    | 13.3 | 1        | Ttn     | 33.48  | 32.77 | 4.05  | 1.42  |      | 0.73  | 26.66 |      |      |       |      | 0.89 |      |       |     |     |      |      |       |       |      |      |      | 100   | 111          |
| S11    | 13.3 | 2        | Chl     | 29.26  | 0.42  | 18.07 | 21.69 | 0.60 | 14.97 |       |      |      |       |      |      |      |       |     |     |      |      |       |       |      |      |      | 85    | 98           |
| S11    | 13.4 | 1        | Ep      | 41.05  |       | 27.04 | 3.50  |      | 2.27  | 23.14 |      |      |       |      |      |      |       |     |     |      |      |       |       |      |      |      | 97    | 105          |
| S11    | 13.4 | 2        | Ep      | 40.23  |       | 26.42 | 7.47  |      |       | 22.88 |      |      |       |      |      |      |       |     |     |      |      |       |       |      |      |      | 97    | 108          |
| S11    | 13.4 | 3        | Qz      | 97.59  |       | 1.63  |       |      |       |       | 0.78 |      |       |      |      |      |       |     |     |      |      |       |       |      |      |      | 100   | 119          |
| S11    | 14   | 1        | Ilm     |        | 50.16 |       | 45.95 | 3.89 |       |       |      |      |       |      |      |      |       |     |     |      |      |       |       |      |      |      | 100   | 107          |
| S11    | 14   | 2        | Qz      | 100.00 |       |       |       |      |       |       |      |      |       |      |      |      |       |     |     |      |      |       |       |      |      |      | 100   | 121          |
| S11    | 14   | 3        | Grt     | 41.99  |       | 21.22 | 2.71  |      |       | 34.09 |      |      |       |      |      |      |       |     |     |      |      |       |       |      |      |      | 100   | 115          |
| S11    | 14   | 4        | Chr     |        |       | 20.16 | 16.87 |      | 10.85 |       |      |      |       |      |      | 0.51 | 51.62 |     |     |      |      |       |       |      |      |      | 100   | 108          |
| S11    | 14   | 5        | TiO2    |        | 99.61 |       | 0.39  |      |       |       |      |      |       |      |      |      |       |     |     |      |      |       |       |      |      |      | 100   | 109          |
| S11    | 14   | 6        | Grt     | 40.24  | 0.44  | 21.06 | 28.95 |      | 5.42  | 3.89  |      |      |       |      |      |      |       |     |     |      |      |       |       |      |      |      | 100   | 113          |
| S11    | 14   | 7        | Qz      | 99.77  |       |       | 0.23  |      |       |       |      |      |       |      |      |      |       |     |     |      |      |       |       |      |      |      | 100   | 121          |
| S11    | 14   | 8        | Qz      | 100.00 |       |       |       |      |       |       |      |      |       |      |      |      |       |     |     |      |      |       |       |      |      |      | 100   | 120          |
| S11    | 14   | 9        | Grt     | 41.74  |       | 20.33 | 3.04  |      |       | 34.89 |      |      |       |      |      |      |       |     |     |      |      |       |       |      |      |      | 100   | 114          |
| S11    | 14   | 10       | Feohy   |        | 6.54  | 4.27  | 85.34 | 0.89 | 2.97  |       |      |      |       |      |      |      |       |     |     |      |      |       |       |      |      |      | 100   | 98           |
| S11    | 14   | 11       | Ilm     |        | 51.57 |       | 46.49 | 1.93 |       |       |      |      |       |      |      |      |       |     |     |      |      |       |       |      |      |      | 100   | 107          |
| S11    | 14   | 12       | Opx     | 58.60  |       | 0.58  | 4.96  |      | 35.17 | 0.41  |      |      |       |      |      |      | 0.28  |     |     |      |      |       |       |      |      |      | 100   | 121          |
| S11    | 14   | 13       | Grt     | 39.39  |       | 20.87 | 33.58 | 1.51 | 3.30  | 1.35  |      |      |       |      |      |      |       |     |     |      |      |       |       |      |      |      | 100   | 116          |
| S11    | 14   | 14       | Chr     |        |       | 9.20  | 13.12 |      | 12.88 |       |      |      |       |      |      |      | 64.80 |     |     |      |      |       |       |      |      |      | 100   | 113          |

Table B6.1: EDS analyses of sample S11.

| Sample | Site | Position | Mineral              | SiO2  | TiO2   | Al2O3 | FeO   | MnO  | MgO   | CaO   | Na2O  | K2O  | P2O5  | SO3   | F    | V2O5 | Cr2O3 | NiO  | CuO | ZnO | SrO | ZrO2  | Nb2O5 | SnO2 | HfO2 | WO3  | Total | Actual Total |
|--------|------|----------|----------------------|-------|--------|-------|-------|------|-------|-------|-------|------|-------|-------|------|------|-------|------|-----|-----|-----|-------|-------|------|------|------|-------|--------------|
| S11    | 14   | 15       | Chr                  |       | 0.52   | 17.12 | 27.84 |      | 8.72  |       |       |      |       |       |      |      | 45.80 |      |     |     |     |       |       |      |      |      | 100   | 110          |
| S11    | 14   | 16       | Ttn                  | 33.44 | 35.39  | 2.08  | 1.19  |      |       | 27.89 |       |      |       |       |      |      |       |      |     |     |     |       |       |      |      |      | 100   | 113          |
| S11    | 14   | 17       | Chr                  |       |        | 11.46 | 19.98 |      | 10.44 |       |       |      |       |       |      |      | 58.13 |      |     |     |     |       |       |      |      |      | 100   | 111          |
| S11    | 14   | 18       | Ap                   |       |        |       |       |      |       | 51.12 | 0.58  |      | 46.21 |       |      |      |       |      |     |     |     |       |       |      |      | 2.08 | 100   | 91           |
| S11    | 14   | 19       | Bt +                 | 38.32 | 1.93   | 15.14 | 32.72 | 0.39 | 4.79  | 0.63  | 0.89  | 4.83 |       |       |      |      |       | 0.37 |     |     |     |       |       |      |      |      | 100   | 100          |
| S11    | 14   | 20       | Ep                   | 40.29 |        | 26.52 | 7.87  | 0.38 |       | 21.94 |       |      |       |       |      |      |       |      |     |     |     |       |       |      |      |      | 97    | 113          |
| S11    | 14   | 21       | Tur                  | 38.46 | 0.80   | 33.43 | 6.83  |      | 5.24  | 0.40  | 1.84  |      |       |       |      |      |       |      |     |     |     |       |       |      |      |      | 87    | 99           |
| S11    | 14.2 | 1        | Ep                   | 41.72 |        | 29.17 | 2.68  |      | 0.73  | 22.70 |       |      |       |       |      |      |       |      |     |     |     |       |       |      |      |      | 97    | 107          |
| S11    | 14.2 | 2        | Chl                  | 31.25 |        | 19.11 | 9.92  | 0.31 | 23.56 | 0.34  | 0.51  |      |       |       |      |      |       |      |     |     |     |       |       |      |      |      | 85    | 104          |
| S11    | 14.2 | 3        | Ab                   | 64.15 |        | 20.55 |       |      |       | 4.82  | 10.48 |      |       |       |      |      |       |      |     |     |     |       |       |      |      |      | 100   | 117          |
| S11    | 14.3 | 1        | Qz                   | 99.61 |        |       | 0.39  |      |       |       |       |      |       |       |      |      |       |      |     |     |     |       |       |      |      |      | 100   | 124          |
| S11    | 14.3 | 2        | Mix (Feohy, Chl, Ap) | 10.94 |        | 7.48  | 69.48 | 1.24 |       | 0.53  | 1.06  | 0.28 | 2.90  |       |      |      |       |      |     |     |     |       |       |      |      | 6.09 | 100   | 80           |
| S11    | 15   | 1        | Chr                  |       | 0.45   | 7.48  | 22.77 |      | 12.71 |       |       |      |       |       |      |      | 56.59 |      |     |     |     |       |       |      |      |      | 100   | 106          |
| S11    | 15   | 2        | Spl                  |       |        | 47.40 | 12.63 |      | 18.50 |       |       |      |       |       |      |      | 21.47 |      |     |     |     |       |       |      |      |      | 100   | 112          |
| S11    | 15   | 3        | Opx                  | 57.79 |        | 1.68  | 5.69  |      | 34.46 | 0.38  |       |      |       |       |      |      |       |      |     |     |     |       |       |      |      |      | 100   | 119          |
| S11    | 15   | 4        | Ep                   | 40.31 |        | 23.89 | 10.69 |      |       | 22.11 |       |      |       |       |      |      |       |      |     |     |     |       |       |      |      |      | 97    | 107          |
| S11    | 15   | 5        | Spl                  |       |        | 32.99 | 15.43 |      | 15.24 |       |       |      |       |       |      |      | 36.34 |      |     |     |     |       |       |      |      |      | 100   | 106          |
| S11    | 15   | 6        | Grt                  | 40.96 | 1.19   | 14.14 | 9.16  | 0.36 |       | 34.20 |       |      |       |       |      |      |       |      |     |     |     |       |       |      |      |      | 100   | 111          |
| S11    | 15   | 7        | Ep                   | 40.04 |        | 22.23 | 12.00 |      |       | 22.40 |       |      |       |       |      |      | 0.33  |      |     |     |     |       |       |      |      |      | 97    | 110          |
| S11    | 15   | 8        | Grt                  | 39.86 |        | 20.69 | 26.49 | 2.65 | 1.03  | 9.28  |       |      |       |       |      |      |       |      |     |     |     |       |       |      |      |      | 100   | 113          |
| S11    | 15   | 9        | Grt                  | 39.87 |        | 21.19 | 30.62 | 1.46 | 5.89  | 0.97  |       |      |       |       |      |      |       |      |     |     |     |       |       |      |      |      | 100   | 115          |
| S11    | 15   | 10       | Chl                  | 34.85 |        | 18.61 | 21.10 | 0.48 | 9.30  | 0.66  |       |      |       |       |      |      |       |      |     |     |     |       |       |      |      |      | 85    | 115          |
| S11    | 15   | 11       | Chr                  |       | 0.35   | 22.74 | 25.07 |      | 8.44  |       |       |      |       |       |      |      | 43.39 |      |     |     |     |       |       |      |      |      | 100   | 107          |
| S11    | 15   | 12       | Ep                   | 40.07 | 0.49   | 23.93 | 9.58  |      |       | 22.58 |       |      |       |       |      | 0.35 |       |      |     |     |     |       |       |      |      |      | 97    | 109          |
| S11    | 15   | 13       | Ep                   | 40.40 |        | 26.94 | 6.85  |      |       | 22.81 |       |      |       |       |      |      |       |      |     |     |     |       |       |      |      |      | 97    | 104          |
| S11    | 15   | 14       | Ilm                  |       | 52.96  |       | 44.05 | 2.99 |       |       |       |      |       |       |      |      |       |      |     |     |     |       |       |      |      |      | 100   | 104          |
| S11    | 15   | 15       | Ilm                  |       | 55.01  |       | 43.45 | 1.53 |       |       |       |      |       |       |      |      |       |      |     |     |     |       |       |      |      |      | 100   | 103          |
| S11    | 15   | 16       | Ep                   | 39.37 |        | 20.44 | 13.52 | 2.01 |       | 21.66 |       |      |       |       |      |      |       |      |     |     |     |       |       |      |      |      | 97    | 118          |
| S11    | 15   | 17       | Ep                   | 40.24 |        | 25.42 | 8.59  |      |       | 22.74 |       |      |       |       |      |      |       |      |     |     |     |       |       |      |      |      | 97    | 111          |
| S11    | 15   | 18       | Grt                  | 39.53 |        | 20.91 | 31.42 | 0.63 | 2.12  | 5.40  |       |      |       |       |      |      |       |      |     |     |     |       |       |      |      |      | 100   | 113          |
| S11    | 15   | 19       | Ep                   | 39.74 |        | 20.39 | 15.08 |      |       | 21.79 |       |      |       |       |      |      |       |      |     |     |     |       |       |      |      |      | 97    | 107          |
| S11    | 15   | 20       | Ep                   | 40.30 |        | 25.44 | 8.79  |      |       | 22.48 |       |      |       |       |      |      |       |      |     |     |     |       |       |      |      |      | 97    | 108          |
| S11    | 15.2 | 1        | Ttn                  | 33.43 | 36.13  | 1.30  | 1.05  |      |       | 27.26 |       |      |       |       |      | 0.83 |       |      |     |     |     |       |       |      |      |      | 100   | 112          |
| S11    | 15.2 | 2        | Ttn + TiO2 +         | 16.82 | 46.45  | 0.82  | 16.30 | 6.84 |       | 12.77 |       |      |       |       |      |      |       |      |     |     |     |       |       |      |      |      | 100   | 108          |
| S11    | 15.3 | 1        | Qz                   | 99.48 | 0.52   |       |       |      |       |       |       |      |       |       |      |      |       |      |     |     |     |       |       |      |      |      | 100   | 122          |
| S11    | 15.3 | 2        | Chl +                | 25.08 | 1.62   | 20.24 | 26.61 | 0.38 | 11.07 |       |       |      |       |       |      |      |       |      |     |     |     |       |       |      |      |      | 85    | 100          |
| S11    | 15.3 | 3        | TiO2                 |       | 100.00 |       |       |      |       |       |       |      |       |       |      |      |       |      |     |     |     |       |       |      |      |      | 100   | 108          |
| S11    | 16   | 1        | Grt                  | 39.60 |        | 20.68 | 27.72 | 3.46 | 1.74  | 6.80  |       |      |       |       |      |      |       |      |     |     |     |       |       |      |      |      | 100   | 110          |
| S11    | 16   | 2        | Zrn                  | 30.84 |        |       |       |      |       |       |       |      |       |       |      |      |       |      |     |     |     | 69.16 |       |      |      |      | 100   | 122          |
| S11    | 16   | 3        | Py                   |       |        |       | 30.92 |      |       |       | 0.67  |      |       | 67.39 |      |      |       |      |     |     |     |       |       |      |      | 1.02 | 100   | 184          |
| S11    | 16   | 4        | Feohy                |       | 10.67  | 2.50  | 83.00 | 1.92 | 1.90  |       |       |      |       |       |      |      |       |      |     |     |     |       |       |      |      |      | 100   | 97           |
| S11    | 16   | 5        | Ilm                  |       | 53.75  |       | 44.77 | 1.48 |       |       |       |      |       |       |      |      |       |      |     |     |     |       |       |      |      |      | 100   | 105          |
| S11    | 16   | 6        | TiO2                 |       | 99.54  |       | 0.46  |      |       |       |       |      |       |       |      |      |       |      |     |     |     |       |       |      |      |      | 100   | 106          |
| S11    | 16   | 7        | Ep                   | 40.40 |        | 26.96 | 6.95  |      |       | 22.69 |       |      |       |       |      |      |       |      |     |     |     |       |       |      |      |      | 97    | 108          |
| S11    | 16   | 8        | Ap                   |       |        |       |       |      |       | 46.42 | 1.36  |      | 39.01 | 1.83  | 8.82 |      |       |      |     |     |     |       |       |      |      | 2.56 | 100   | 109          |
| S11    | 16   | 9        | Py                   | 0.91  |        |       | 35.86 |      |       | 0.33  | 0.35  |      | 62.55 |       |      |      |       |      |     |     |     |       |       |      |      |      | 100   | 179          |
| S11    | 16   | 10       | Tur                  | 38.68 |        | 30.89 | 8.96  |      | 5.95  |       | 2.52  |      |       |       |      |      |       |      |     |     |     |       |       |      |      |      | 87    | 97           |
| S11    | 16   | 11       | Ep                   | 40.07 |        | 24.08 | 10.49 |      |       | 22.37 |       |      |       |       |      |      |       |      |     |     |     |       |       |      |      |      | 97    | 109          |
| S11    | 16   | 12       | Ilm                  |       | 50.59  |       | 47.57 | 1.84 |       |       |       |      |       |       |      |      |       |      |     |     |     |       |       |      |      |      | 100   | 106          |
| S11    | 16   | 13       | Chr                  |       |        | 19.13 | 16.21 |      | 13.43 |       |       |      |       |       |      | 0.39 | 50.84 |      |     |     |     |       |       |      |      |      | 100   | 109          |



Table B6.1: EDS analyses of sample S11.

| Sample | Site | Position | Mineral | SiO2  | TiO2  | Al2O3 | FeO   | MnO  | MgO   | CaO   | Na2O | K2O | P2O5 | SO3 | F | V2O5 | Cr2O3 | NiO | CuO | ZnO | SrO | ZrO2 | Nb2O5 | SnO2 | HfO2 | WO3 | Total | Actual Total |
|--------|------|----------|---------|-------|-------|-------|-------|------|-------|-------|------|-----|------|-----|---|------|-------|-----|-----|-----|-----|------|-------|------|------|-----|-------|--------------|
| S11    | 16   | 14       | Ttn     | 32.82 | 37.14 | 1.28  | 0.52  |      |       | 28.24 |      |     |      |     |   |      |       |     |     |     |     |      |       |      |      |     | 100   | 109          |
| S11    | 16   | 15       | Grt     | 39.71 |       | 21.23 | 26.22 | 0.91 | 2.74  | 9.19  |      |     |      |     |   |      |       |     |     |     |     |      |       |      |      |     | 100   | 114          |
| S11    | 16   | 16       | Tur     | 37.00 | 1.34  | 33.19 | 6.79  |      | 5.72  | 1.39  | 1.57 |     |      |     |   |      |       |     |     |     |     |      |       |      |      |     | 87    | 101          |
| S11    | 16   | 17       | Cpx     | 51.32 | 0.79  | 5.48  | 4.42  |      | 15.08 | 22.90 |      |     |      |     |   |      |       |     |     |     |     |      |       |      |      |     | 100   | 116          |
| S11    | 16   | 18       | Grt     | 41.73 |       | 20.47 | 3.30  | 0.32 |       | 34.17 |      |     |      |     |   |      |       |     |     |     |     |      |       |      |      |     | 100   | 114          |
| S11    | 16   | 19       | Grt     | 39.58 |       | 21.15 | 31.33 | 0.63 | 2.78  | 4.53  |      |     |      |     |   |      |       |     |     |     |     |      |       |      |      |     | 100   | 115          |
| S11    | 16   | 20       | Grt     | 41.80 |       | 20.47 | 2.92  |      |       | 34.81 |      |     |      |     |   |      |       |     |     |     |     |      |       |      |      |     | 100   | 114          |
| S11    | 16   | 21       | Spl     |       |       | 28.01 | 15.12 |      | 15.67 |       |      |     |      |     |   |      | 41.20 |     |     |     |     |      |       |      |      |     | 100   | 108          |
| S11    | 16   | 22       | TiO2    |       | 99.57 |       | 0.43  |      |       |       |      |     |      |     |   |      |       |     |     |     |     |      |       |      |      |     | 100   | 107          |
| S11    | 16   | 23       | Ilm     |       | 53.91 |       | 45.30 | 0.79 |       |       |      |     |      |     |   |      |       |     |     |     |     |      |       |      |      |     | 100   | 105          |
| S11    | 16.2 | 1        | Qz      | 99.44 |       |       | 0.56  |      |       |       |      |     |      |     |   |      |       |     |     |     |     |      |       |      |      |     | 100   | 119          |
| S11    | 16.2 | 2        | Ep      | 40.31 |       | 25.19 | 8.70  |      |       | 22.80 |      |     |      |     |   |      |       |     |     |     |     |      |       |      |      |     | 97    | 109          |
| S11    | 17   | 1        | Dol     |       |       |       |       |      | 22.63 | 31.37 |      |     |      |     |   |      |       |     |     |     |     |      |       |      |      |     | 54    | 56           |
| S11    | 17   | 2        | Ttn     | 33.14 | 35.58 | 1.49  | 2.28  |      |       | 27.51 |      |     |      |     |   |      |       |     |     |     |     |      |       |      |      |     | 100   | 106          |
| S11    | 17   | 3        | Chr     |       |       | 19.43 | 18.48 |      | 11.75 |       |      |     |      |     |   | 0.40 | 49.94 |     |     |     |     |      |       |      |      |     | 100   | 107          |
| S11    | 17   | 4        | Grt     | 40.12 |       | 20.85 | 26.77 | 0.33 | 1.87  | 10.06 |      |     |      |     |   |      |       |     |     |     |     |      |       |      |      |     | 100   | 113          |
| S11    | 17   | 5        | Grt     | 41.33 | 0.56  | 20.58 | 3.11  |      |       | 34.42 |      |     |      |     |   |      |       |     |     |     |     |      |       |      |      |     | 100   | 113          |
| S11    | 17   | 6        | Grt     | 39.93 |       | 21.14 | 28.71 | 1.16 | 3.15  | 5.90  |      |     |      |     |   |      |       |     |     |     |     |      |       |      |      |     | 100   | 111          |
| S11    | 17   | 7        | Ttn     | 33.11 | 36.26 | 1.33  | 1.60  |      |       | 27.69 |      |     |      |     |   |      |       |     |     |     |     |      |       |      |      |     | 100   | 109          |

Table B6.1: EDS analyses of sample S11.

| Sample | Site | Position | Mineral                              | SiO2  | TiO2 | Al2O3 | FeO   | MnO  | MgO   | CaO   | Na2O | K2O | P2O5 | SO3 | F | V2O5 | Cr2O3 | NiO | CuO  | ZnO  | SrO | ZrO2 | Nb2O5 | SnO2 | HfO2 | WO3 | Total | Actual Total |
|--------|------|----------|--------------------------------------|-------|------|-------|-------|------|-------|-------|------|-----|------|-----|---|------|-------|-----|------|------|-----|------|-------|------|------|-----|-------|--------------|
| S11    | 17   | 8        | Mag +                                | 3.55  |      | 0.77  | 94.62 |      |       | 0.51  |      |     |      |     |   |      |       |     | 0.54 |      |     |      |       |      |      |     | 100   | 80           |
| S11    | 17   | 9        | Chr                                  |       |      | 24.62 | 21.31 |      | 12.76 |       |      |     |      |     |   |      | 41.31 |     |      |      |     |      |       |      |      |     | 100   | 109          |
| S11    | 17   | 10       | St                                   | 29.85 | 0.69 | 54.20 | 10.18 |      | 1.22  |       |      |     |      |     |   |      | 0.30  |     |      | 1.56 |     |      |       |      |      |     | 98    | 111          |
| S11    | 17   | 11       | Grt                                  | 39.83 |      | 21.04 | 22.76 | 4.58 | 0.71  | 11.09 |      |     |      |     |   |      |       |     |      |      |     |      |       |      |      |     | 100   | 114          |
| S11    | 17   | 12       | Chr                                  |       |      | 20.97 | 19.80 |      | 11.61 |       |      |     |      |     |   |      | 47.62 |     |      |      |     |      |       |      |      |     | 100   | 111          |
| S11    | 17   | 13       | Grt                                  | 41.42 |      | 19.96 | 4.63  | 1.82 |       | 32.18 |      |     |      |     |   |      |       |     |      |      |     |      |       |      |      |     | 100   | 116          |
| S11    | 17   | 14       | Cpx                                  | 53.13 | 0.67 | 1.99  | 9.81  | 0.37 | 14.91 | 19.12 |      |     |      |     |   |      |       |     |      |      |     |      |       |      |      |     | 100   | 117          |
| S11    | 17   | 15       | Grt                                  | 41.10 |      | 21.82 | 25.24 | 0.47 | 9.38  | 1.99  |      |     |      |     |   |      |       |     |      |      |     |      |       |      |      |     | 100   | 114          |
| S11    | 17   | 16       | Ep                                   | 40.40 |      | 23.85 | 10.31 |      |       | 22.44 |      |     |      |     |   |      |       |     |      |      |     |      |       |      |      |     | 97    | 107          |
|        |      |          | Notes                                |       |      |       |       |      |       |       |      |     |      |     |   |      |       |     |      |      |     |      |       |      |      |     |       |              |
|        |      |          | + = indicates other minerals present |       |      |       |       |      |       |       |      |     |      |     |   |      |       |     |      |      |     |      |       |      |      |     |       |              |
|        |      |          |                                      |       |      |       |       |      |       |       |      |     |      |     |   |      |       |     |      |      |     |      |       |      |      |     |       |              |
|        |      |          |                                      |       |      |       |       |      |       |       |      |     |      |     |   |      |       |     |      |      |     |      |       |      |      |     |       |              |
|        |      |          |                                      |       |      |       |       |      |       |       |      |     |      |     |   |      |       |     |      |      |     |      |       |      |      |     |       |              |
|        |      |          |                                      |       |      |       |       |      |       |       |      |     |      |     |   |      |       |     |      |      |     |      |       |      |      |     |       |              |
|        |      |          |                                      |       |      |       |       |      |       |       |      |     |      |     |   |      |       |     |      |      |     |      |       |      |      |     |       |              |
|        |      |          |                                      |       |      |       |       |      |       |       |      |     |      |     |   |      |       |     |      |      |     |      |       |      |      |     |       |              |
|        |      |          |                                      |       |      |       |       |      |       |       |      |     |      |     |   |      |       |     |      |      |     |      |       |      |      |     |       |              |
|        |      |          |                                      |       |      |       |       |      |       |       |      |     |      |     |   |      |       |     |      |      |     |      |       |      |      |     |       |              |

Table B6.2: EDS analyses of sample 11.

| Sample | Site | Position | Mineral      | SiO2   | TiO2  | Al2O3 | FeO   | MnO  | MgO   | CaO   | Na2O | K2O  | P2O5  | SO3  | F    | V2O5 | Cr2O3 | CoO | NiO  | CuO | ZnO  | ZrO2 | HfO2 | WO3  | Total | Actual Total |
|--------|------|----------|--------------|--------|-------|-------|-------|------|-------|-------|------|------|-------|------|------|------|-------|-----|------|-----|------|------|------|------|-------|--------------|
| S11    | 18   | 1        | Feohy + Ap + | 4.59   |       |       | 94.21 |      | 0.83  | 0.37  |      |      |       |      |      |      |       |     |      |     |      |      |      |      | 100   | 76           |
| S11    | 18   | 2        | Ilm          |        | 53.97 |       | 44.18 | 1.85 |       |       |      |      |       |      |      |      |       |     |      |     |      |      |      |      | 100   | 101          |
| S11    | 18   | 3        | "Ilm" +      | 21.39  | 46.02 | 11.02 | 16.39 | 0.40 | 2.57  | 2.22  |      |      |       |      |      |      |       |     |      |     |      |      |      |      | 100   | 100          |
| S11    | 18   | 4        | Spl          |        | 0.37  | 30.33 | 24.26 |      | 12.47 |       |      |      |       |      |      |      | 32.56 |     |      |     |      |      |      |      | 100   | 107          |
| S11    | 18   | 5        | Feohy +      | 2.71   |       | 1.51  | 92.60 | 0.41 |       | 0.65  |      |      | 1.65  |      |      |      | 0.48  |     |      |     |      |      |      |      | 100   | 88           |
| S11    | 18   | 6        | Chl          | 26.09  |       | 18.57 | 32.70 |      | 7.19  |       | 0.44 |      |       |      |      |      |       |     |      |     |      |      |      |      | 85    | 98           |
| S11    | 18   | 7        | Feohy +      | 1.21   | 0.46  | 3.20  | 92.35 |      |       |       |      |      |       |      |      |      | 0.85  |     |      |     |      |      | 1.93 |      | 100   | 81           |
| S11    | 18   | 8        | Spl          |        |       | 28.99 | 18.93 |      | 13.65 |       |      |      |       |      |      | 0.35 | 38.08 |     |      |     |      |      |      |      | 100   | 106          |
| S11    | 18   | 9        | Chr          |        |       | 14.95 | 19.75 |      | 12.38 |       |      |      |       |      |      |      | 52.91 |     |      |     |      |      |      |      | 100   | 107          |
| S11    | 18   | 10       | Chr          |        | 0.40  | 18.36 | 24.69 |      | 10.82 |       |      |      |       |      |      |      | 45.73 |     |      |     |      |      |      |      | 100   | 106          |
| S11    | 18   | 11       | Grt          | 39.98  |       | 21.09 | 26.34 |      | 1.36  | 11.24 |      |      |       |      |      |      |       |     |      |     |      |      |      |      | 100   | 115          |
| S11    | 18   | 12       | Ep           | 40.16  |       | 25.78 | 8.13  |      |       | 22.93 |      |      |       |      |      |      |       |     |      |     |      |      |      |      | 97    | 110          |
| S11    | 18   | 13       | Ap           |        |       |       | 0.48  | 0.91 |       | 47.96 |      |      | 42.80 |      | 6.29 |      |       |     |      |     |      |      |      | 1.56 | 100   | 119          |
| S11    | 18   | 14       | Cpx          | 52.69  | 0.74  | 2.43  | 9.21  | 0.70 | 12.21 | 21.34 | 0.68 |      |       |      |      |      |       |     |      |     |      |      |      |      | 100   | 115          |
| S11    | 18   | 15       | Chr          |        |       | 21.54 | 20.03 |      | 12.38 |       |      |      |       |      |      |      | 46.06 |     |      |     |      |      |      |      | 100   | 108          |
| S11    | 18   | 16       | Cld          | 25.66  | 0.71  | 38.49 | 25.59 | 0.57 | 1.98  |       |      |      |       |      |      |      |       |     |      |     |      |      |      |      | 93    | 102          |
| S11    | 18   | 17       | Ep           | 39.67  |       | 21.31 | 13.51 |      |       | 22.50 |      |      |       |      |      |      |       |     |      |     |      |      |      |      | 97    | 108          |
| S11    | 18   | 18       | Chr          |        |       | 29.64 | 17.09 |      | 14.59 |       |      |      |       |      |      |      | 38.68 |     |      |     |      |      |      |      | 100   | 109          |
| S11    | 18   | 19       | Ap           | 0.42   |       |       | 0.29  |      |       | 48.99 | 1.25 |      | 36.19 | 2.49 | 8.74 |      |       |     |      |     |      |      |      | 1.62 | 100   | 111          |
| S11    | 18   | 20       | Qz           | 100.00 |       |       |       |      |       |       |      |      |       |      |      |      |       |     |      |     |      |      |      |      | 100   | 112          |
| S11    | 18   | 21       | Act/Tr       | 57.30  |       | 2.13  | 1.63  |      | 23.06 | 11.99 | 0.38 |      |       |      |      |      | 0.51  |     |      |     |      |      |      |      | 97    | 113          |
| S11    | 19   | 1        | Feohy +      | 4.66   |       | 2.04  | 90.98 |      |       |       |      |      | 1.51  |      |      |      |       |     |      |     | 0.81 |      |      |      | 100   | 76           |
| S11    | 19   | 2        | Grt          | 39.65  |       | 20.87 | 30.65 | 2.58 | 3.85  | 2.40  |      |      |       |      |      |      |       |     |      |     |      |      |      |      | 100   | 111          |
| S11    | 19   | 3        | Qz           | 99.74  |       |       | 0.26  |      |       |       |      |      |       |      |      |      |       |     |      |     |      |      |      |      | 100   | 118          |
| S11    | 19   | 4        | Grt          | 39.43  |       | 21.06 | 30.31 | 2.65 | 2.26  | 4.28  |      |      |       |      |      |      |       |     |      |     |      |      |      |      | 100   | 112          |
| S11    | 19   | 5        | Chr          |        |       | 8.24  | 21.08 |      | 9.88  |       |      |      |       |      |      |      | 60.79 |     |      |     |      |      |      |      | 100   | 106          |
| S11    | 19   | 6        | Spl          |        |       | 26.95 | 14.16 |      | 16.28 |       |      |      |       |      |      |      | 42.61 |     |      |     |      |      |      |      | 100   | 110          |
| S11    | 19   | 7        | Ol           | 41.91  |       |       | 8.29  |      | 49.44 |       |      |      |       |      |      |      |       |     | 0.35 |     |      |      |      |      | 100   | 117          |
| S11    | 19   | 8        | Ep           | 40.41  |       | 25.32 | 9.26  |      |       | 22.01 |      |      |       |      |      |      |       |     |      |     |      |      |      |      | 97    | 106          |
| S11    | 19   | 9        | Ep           | 39.84  |       | 24.02 | 10.20 | 0.24 |       | 22.70 |      |      |       |      |      |      |       |     |      |     |      |      |      |      | 97    | 110          |
| S11    | 19   | 10       | Ap           |        |       |       | 0.39  |      |       | 49.24 | 0.94 |      | 38.90 | 2.06 | 8.48 |      |       |     |      |     |      |      |      |      | 100   | 114          |
| S11    | 19   | 11       | Pg           | 47.58  |       | 37.45 | 0.46  |      |       |       | 7.76 | 0.22 |       |      | 1.54 |      |       |     |      |     |      |      |      |      | 95    | 112          |
| S11    | 19   | 12       | Ap           |        |       | 0.44  | 0.57  |      |       | 46.43 | 0.78 |      | 40.57 | 1.04 | 7.76 |      |       |     |      |     |      |      | 2.40 |      | 100   | 110          |
| S11    | 19   | 13       | Ep           | 40.13  |       | 24.54 | 9.55  | 0.30 |       | 22.47 |      |      |       |      |      |      |       |     |      |     |      |      |      |      | 97    | 110          |
| S11    | 19   | 14       | Chr          |        |       | 17.13 | 39.19 |      | 4.78  |       |      |      |       |      |      |      | 38.39 |     |      |     | 0.51 |      |      |      | 100   | 105          |
| S11    | 19   | 15       | Grt          | 39.34  |       | 20.79 | 26.29 | 8.19 | 3.02  | 2.38  |      |      |       |      |      |      |       |     |      |     |      |      |      |      | 100   | 110          |
| S11    | 19   | 16       | Chr          |        |       | 10.44 | 23.44 |      | 8.44  |       |      |      |       |      |      | 0.43 | 57.25 |     |      |     |      |      |      |      | 100   | 107          |
| S11    | 19   | 17       | Grt          | 39.61  |       | 21.11 | 31.66 | 1.02 | 5.24  | 1.36  |      |      |       |      |      |      |       |     |      |     |      |      |      |      | 100   | 113          |
| S11    | 19   | 18       | Grt          | 38.97  |       | 20.46 | 33.55 | 2.49 | 1.54  | 3.00  |      |      |       |      |      |      |       |     |      |     |      |      |      |      | 100   | 116          |
| S11    | 20   | 1        | Cpx          | 51.69  | 0.79  | 4.48  | 6.02  |      | 15.02 | 21.69 | 0.32 |      |       |      |      |      |       |     |      |     |      |      |      |      | 100   | 111          |

Table B6.2: EDS analyses of sample 11.

| Sample | Site | Position | Mineral | SiO2  | TiO2  | Al2O3 | FeO   | MnO  | MgO   | CaO   | Na2O  | K2O   | P2O5  | SO3  | F    | V2O5 | Cr2O3 | CoO | NiO | CuO | ZnO | ZrO2 | HfO2 | WO3 | Total | Actual Total |
|--------|------|----------|---------|-------|-------|-------|-------|------|-------|-------|-------|-------|-------|------|------|------|-------|-----|-----|-----|-----|------|------|-----|-------|--------------|
| S11    | 20   | 2        | Ti-Mag  |       | 28.46 | 1.31  | 67.40 | 1.54 | 1.28  |       |       |       |       |      |      |      |       |     |     |     |     |      |      |     | 100   | 101          |
| S11    | 20   | 3        | Chr     |       |       | 20.00 | 17.80 |      | 12.71 |       |       |       |       |      |      |      | 49.49 |     |     |     |     |      |      |     | 100   | 106          |
| S11    | 20   | 4        | Tur     | 37.14 | 0.91  | 32.46 | 9.03  |      | 4.66  | 0.70  | 2.09  |       |       |      |      |      |       |     |     |     |     |      |      |     | 87    | 97           |
| S11    | 20   | 5        | Grt     | 41.74 |       | 20.97 | 3.44  |      |       | 33.84 |       |       |       |      |      |      |       |     |     |     |     |      |      |     | 100   | 110          |
| S11    | 20   | 6        | Chr     |       |       | 12.43 | 22.29 |      | 8.95  |       |       |       |       |      |      | 0.42 | 55.91 |     |     |     |     |      |      |     | 100   | 106          |
| S11    | 20   | 7        | Ttn+    | 21.26 | 53.49 | 3.97  | 2.31  |      |       | 17.25 |       |       |       |      | 1.71 |      |       |     |     |     |     |      |      |     | 100   | 108          |
| S11    | 20   | 8        | Ilm     |       | 54.21 |       | 41.33 | 4.46 |       |       |       |       |       |      |      |      |       |     |     |     |     |      |      |     | 100   | 106          |
| S11    | 20   | 9        | Ap      |       |       | 0.61  | 1.31  | 0.38 |       | 43.96 | 1.46  |       | 38.27 | 1.20 | 9.10 |      |       |     |     |     |     |      | 3.72 |     | 100   | 106          |
| S11    | 20   | 10       | Grt     | 39.24 |       | 20.87 | 26.36 | 7.07 | 0.64  | 5.82  |       |       |       |      |      |      |       |     |     |     |     |      |      |     | 100   | 110          |
| S11    | 20   | 11       | St      | 28.91 | 0.49  | 54.59 | 12.00 | 0.41 | 1.61  |       |       |       |       |      |      |      |       |     |     |     |     |      |      |     | 98    | 110          |
| S11    | 20   | 12       | Grt     | 40.60 |       | 21.66 | 27.41 | 0.70 | 8.20  | 1.44  |       |       |       |      |      |      |       |     |     |     |     |      |      |     | 100   | 113          |
| S11    | 20   | 13       | Ms      | 50.45 | 0.25  | 29.01 | 2.50  |      | 2.08  |       | 0.57  | 10.15 |       |      |      |      |       |     |     |     |     |      |      |     | 95    | 110          |
| S11    | 20   | 14       | Grt     | 39.42 |       | 20.86 | 29.44 | 5.10 | 3.74  | 1.43  |       |       |       |      |      |      |       |     |     |     |     |      |      |     | 100   | 113          |
| S11    | 20   | 15       | Chr     |       |       | 19.09 | 19.99 |      | 11.77 |       |       |       |       |      |      |      | 49.16 |     |     |     |     |      |      |     | 100   | 110          |
| S11    | 20   | 16       | Ep      | 40.60 |       | 25.13 | 8.59  |      |       | 22.67 |       |       |       |      |      |      |       |     |     |     |     |      |      |     | 97    | 112          |
| S11    | 20   | 17       | Grt     | 39.71 |       | 21.22 | 24.23 | 0.87 | 1.82  | 12.16 |       |       |       |      |      |      |       |     |     |     |     |      |      |     | 100   | 117          |
| S11    | 20   | 18       | Qz +    | 95.25 |       | 1.39  | 2.52  |      | 0.84  |       |       |       |       |      |      |      |       |     |     |     |     |      |      |     | 100   | 118          |
| S11    | 20   | 19       | Ap      |       |       |       |       |      | 0.33  | 48.45 | 1.14  |       | 38.02 | 2.34 | 8.26 |      |       |     |     |     |     |      | 1.46 |     | 100   | 116          |
| S11    | 21   | 1        | Ab      | 69.72 |       | 18.70 |       |      |       |       | 11.58 |       |       |      |      |      |       |     |     |     |     |      |      |     | 100   | 116          |
| S11    | 21   | 2        | Tur     | 37.96 | 0.61  | 29.36 | 10.29 |      | 5.76  | 0.49  | 2.53  |       |       |      |      |      |       |     |     |     |     |      |      |     | 87    | 97           |
| S11    | 21   | 3        | "Ilm" + | 23.56 | 50.58 | 4.76  | 5.27  |      | 1.74  | 14.09 |       |       |       |      |      |      |       |     |     |     |     |      |      |     | 100   | 100          |
| S11    | 21   | 4        | Dol     |       |       |       |       |      | 22.42 | 31.58 |       |       |       |      |      |      |       |     |     |     |     |      |      |     | 54    | 57           |
| S11    | 21   | 5        | Ep      | 40.34 |       | 22.81 | 11.38 |      |       | 22.47 |       |       |       |      |      |      |       |     |     |     |     |      |      |     | 97    | 110          |
| S11    | 21   | 6        | Ep      | 40.21 |       | 26.17 | 7.95  |      |       | 22.67 |       |       |       |      |      |      |       |     |     |     |     |      |      |     | 97    | 113          |
| S11    | 21   | 7        | Ep      | 39.86 |       | 22.97 | 11.50 |      |       | 22.67 |       |       |       |      |      |      |       |     |     |     |     |      |      |     | 97    | 113          |
| S11    | 21   | 8        | Ep      | 40.39 |       | 24.37 | 9.98  |      |       | 22.26 |       |       |       |      |      |      |       |     |     |     |     |      |      |     | 97    | 110          |
| S11    | 21   | 9        | Chr     |       |       | 17.86 | 18.96 |      | 11.98 |       |       |       |       |      |      | 0.37 | 50.83 |     |     |     |     |      |      |     | 100   | 111          |
| S11    | 21   | 10       | Grt     | 39.95 |       | 21.03 | 27.79 | 4.63 | 5.12  | 1.49  |       |       |       |      |      |      |       |     |     |     |     |      |      |     | 100   | 117          |
| S11    | 21   | 11       | Grt     | 41.20 | 0.54  | 18.29 | 5.03  |      |       | 34.94 |       |       |       |      |      |      |       |     |     |     |     |      |      |     | 100   | 115          |
| S11    | 21   | 12       | "Ilm"   |       | 71.00 |       | 27.09 | 1.90 |       |       |       |       |       |      |      |      |       |     |     |     |     |      |      |     | 100   | 102          |
| S11    | 21   | 13       | Cpx     | 50.34 | 1.13  | 4.74  | 8.30  | 0.35 | 12.50 | 22.15 | 0.50  |       |       |      |      |      |       |     |     |     |     |      |      |     | 100   | 113          |
| S11    | 21   | 14       | Chl +   | 27.87 | 0.68  | 18.63 | 30.03 |      | 0.84  | 0.42  | 0.94  | 0.99  | 1.17  | 0.53 |      |      |       |     |     |     |     |      | 2.90 |     | 85    | 91           |
| S11    | 21   | 15       | Spl     |       |       | 35.46 | 17.32 |      | 14.76 |       |       |       |       |      |      |      | 32.45 |     |     |     |     |      |      |     | 100   | 111          |
| S11    | 21   | 16       | Ep      | 40.25 |       | 23.97 | 10.47 | 0.54 |       | 21.76 |       |       |       |      |      |      |       |     |     |     |     |      |      |     | 97    | 111          |
| S11    | 21   | 17       | Chl     |       |       | 9.98  | 18.19 |      | 8.03  |       |       |       |       |      |      |      | 48.79 |     |     |     |     |      |      |     | 85    | 109          |
| S11    | 21   | 18       | Tur     | 37.87 | 0.88  | 29.68 | 7.96  |      | 7.18  | 0.92  | 2.51  |       |       |      |      |      |       |     |     |     |     |      |      |     | 87    | 102          |
| S11    | 21   | 19       | Grt     | 39.28 |       | 20.40 | 31.29 | 3.82 | 2.37  | 2.85  |       |       |       |      |      |      |       |     |     |     |     |      |      |     | 100   | 117          |
| S11    | 21   | 20       | Grt     | 39.61 |       | 21.00 | 28.04 | 0.87 | 3.67  | 6.81  |       |       |       |      |      |      |       |     |     |     |     |      |      |     | 100   | 119          |
| S11    | 22   | 1        | Grt     | 38.52 | 1.46  | 20.66 | 33.22 | 0.70 | 1.26  | 4.17  |       |       |       |      |      |      |       |     |     |     |     |      |      |     | 100   | 109          |
| S11    | 22   | 2        | Grt     | 41.54 |       | 21.08 | 2.42  |      |       | 34.96 |       |       |       |      |      |      |       |     |     |     |     |      |      |     | 100   | 111          |



Table B6.2: EDS analyses of sample 11.

| Sample | Site | Position | Mineral      | SiO2   | TiO2  | Al2O3 | FeO   | MnO   | MgO   | CaO   | Na2O | K2O | P2O5  | SO3  | F     | V2O5 | Cr2O3 | CoO  | NiO  | CuO  | ZnO | ZrO2  | HfO2 | WO3 | Total | Actual Total |
|--------|------|----------|--------------|--------|-------|-------|-------|-------|-------|-------|------|-----|-------|------|-------|------|-------|------|------|------|-----|-------|------|-----|-------|--------------|
| S11    | 22   | 3        | Tur          | 38.61  | 0.68  | 31.59 | 4.02  |       | 8.84  | 0.77  | 2.50 |     |       |      |       |      |       |      |      |      |     |       |      |     | 87    | 98           |
| S11    | 22   | 4        | Gln          | 59.27  |       | 11.33 | 8.32  |       | 10.37 | 0.52  | 7.18 |     |       |      |       |      |       |      |      |      |     |       |      |     | 97    | 109          |
| S11    | 22   | 5        | Ep           | 39.79  |       | 22.03 | 12.63 |       |       | 22.55 |      |     |       |      |       |      |       |      |      |      |     |       |      |     | 97    | 106          |
| S11    | 22   | 6        | Ti-Mag +     |        | 7.57  | 5.37  | 81.67 | 0.88  | 3.81  |       |      |     |       |      |       | 0.71 |       |      |      |      |     |       |      |     | 100   | 99           |
| S11    | 22   | 7        | Qz           | 100.00 |       |       |       |       |       |       |      |     |       |      |       |      |       |      |      |      |     |       |      |     | 100   | 119          |
| S11    | 22   | 8        | Grt          | 39.36  |       | 20.72 | 30.21 | 3.58  | 1.12  | 5.01  |      |     |       |      |       |      |       |      |      |      |     |       |      |     | 100   | 110          |
| S11    | 22   | 9        | Chr          |        | 0.41  | 20.43 | 28.33 |       | 9.01  |       |      |     |       |      |       |      | 41.82 |      |      |      |     |       |      |     | 100   | 104          |
| S11    | 22   | 10       | TiO2         |        | 99.59 |       | 0.41  |       |       |       |      |     |       |      |       |      |       |      |      |      |     |       |      |     | 100   | 109          |
| S11    | 22   | 11       | Grt          | 39.33  |       | 20.99 | 30.76 | 0.36  | 2.42  | 6.14  |      |     |       |      |       |      |       |      |      |      |     |       |      |     | 100   | 114          |
| S11    | 22   | 12       | Ep           | 40.58  |       | 27.26 | 6.18  |       |       | 22.98 |      |     |       |      |       |      |       |      |      |      |     |       |      |     | 97    | 111          |
| S11    | 22   | 13       | Chr          |        | 0.48  | 16.42 | 26.82 |       | 9.94  |       |      |     |       |      |       |      | 46.33 |      |      |      |     |       |      |     | 100   | 110          |
| S11    | 22   | 14       | Ep           | 39.55  |       | 19.89 | 15.20 |       |       | 22.36 |      |     |       |      |       |      |       |      |      |      |     |       |      |     | 97    | 112          |
| S11    | 22   | 15       | Chr          |        |       | 23.71 | 16.38 |       | 14.49 |       |      |     |       |      |       | 0.34 | 45.07 |      |      |      |     |       |      |     | 100   | 113          |
| S11    | 22   | 16       | Qz           | 100.00 |       |       |       |       |       |       |      |     |       |      |       |      |       |      |      |      |     |       |      |     | 100   | 119          |
| S11    | 22   | 17       | Grt          | 41.67  |       | 21.24 | 2.65  |       |       | 34.45 |      |     |       |      |       |      |       |      |      |      |     |       |      |     | 100   | 113          |
| S11    | 22   | 18       | Chr          |        |       | 5.23  | 19.59 | 0.93  | 9.61  |       |      |     |       |      |       |      | 64.65 |      |      |      |     |       |      |     | 100   | 106          |
| S11    | 22   | 19       | Ilm          |        | 53.52 |       | 43.89 | 2.59  |       |       |      |     |       |      |       |      |       |      |      |      |     |       |      |     | 100   | 106          |
| S11    | 23   | 1        | Tur          | 37.67  | 0.75  | 34.01 | 6.30  |       | 5.69  | 1.16  | 1.43 |     |       |      |       |      |       |      |      |      |     |       |      |     | 87    | 99           |
| S11    | 23   | 2        | Chl          | 26.74  |       | 19.76 | 25.09 |       | 13.41 |       |      |     |       |      |       |      |       |      |      |      |     |       |      |     | 85    | 96           |
| S11    | 23   | 3        | Cld          | 26.31  |       | 40.46 | 22.87 | 1.24  | 2.13  |       |      |     |       |      |       |      |       |      |      |      |     |       |      |     | 93    | 103          |
| S11    | 23   | 4        | Zrn          | 31.00  |       |       | 0.34  |       |       |       |      |     |       |      |       |      |       |      |      |      |     | 67.24 | 1.42 |     | 100   | 121          |
| S11    | 23   | 5        | Spl          |        |       | 32.60 | 16.43 |       | 14.95 |       |      |     |       |      |       | 0.33 | 35.69 |      |      |      |     |       |      |     | 100   | 109          |
| S11    | 23   | 6        | Ti-Mag       |        | 7.76  | 3.19  | 84.93 | 1.14  | 2.51  |       |      |     |       |      |       | 0.47 |       |      |      |      |     |       |      |     | 100   | 101          |
| S11    | 23   | 7        | Grt          | 37.12  | 4.62  | 19.76 | 33.98 | 0.34  | 1.96  | 2.23  |      |     |       |      |       |      |       |      |      |      |     |       |      |     | 100   | 115          |
| S11    | 23   | 8        | Ep           | 40.26  |       | 24.62 | 9.80  | 0.24  |       | 22.08 |      |     |       |      |       |      |       |      |      |      |     |       |      |     | 97    | 110          |
| S11    | 23   | 9        | Grt          | 41.69  |       | 21.87 | 1.47  |       |       | 34.96 |      |     |       |      |       |      |       |      |      |      |     |       |      |     | 100   | 115          |
| S11    | 23   | 10       | Ep           | 40.49  |       | 25.90 | 7.96  |       |       | 22.65 |      |     |       |      |       |      |       |      |      |      |     |       |      |     | 97    | 109          |
| S11    | 23   | 11       | Chr          |        |       | 16.08 | 17.76 |       | 8.88  |       |      |     |       |      |       |      | 57.28 |      |      |      |     |       |      |     | 100   | 108          |
| S11    | 23   | 12       | Ti-Mag       |        | 10.49 | 2.45  | 82.88 | 1.98  | 1.70  |       |      |     |       |      |       |      | 0.50  |      |      |      |     |       |      |     | 100   | 101          |
| S11    | 23   | 13       | Mnohy +      | 1.13   |       | 28.78 |       | 46.98 |       |       | 2.87 |     |       |      | 17.39 |      |       | 0.40 | 0.54 | 1.90 |     |       |      |     | 100   | 97           |
| S11    | 23   | 14       | Grt          | 39.81  |       | 20.85 | 25.91 | 3.13  | 2.05  | 8.25  |      |     |       |      |       |      |       |      |      |      |     |       |      |     | 100   | 111          |
| S11    | 23   | 15       | Ep           | 40.27  |       | 24.31 | 9.90  |       |       | 22.51 |      |     |       |      |       |      |       |      |      |      |     |       |      |     | 97    | 107          |
| S11    | 23   | 16       | Spl          |        | 0.42  | 28.75 | 19.59 |       | 13.91 |       |      |     |       |      |       |      | 37.32 |      |      |      |     |       |      |     | 100   | 106          |
| S11    | 23   | 17       | Feohy + Ap + | 1.95   | 0.67  | 3.31  | 47.35 | 0.38  |       | 18.99 | 1.09 |     | 17.20 | 1.05 |       |      | 0.66  |      |      |      |     |       | 7.35 |     | 100   | 71           |
| S11    | 23   | 18       | Ilm          |        | 53.82 |       | 46.18 |       |       |       |      |     |       |      |       |      |       |      |      |      |     |       |      |     | 100   | 107          |
| S11    | 23   | 19       | Grt          | 41.62  | 0.71  | 20.83 | 2.52  |       |       | 34.33 |      |     |       |      |       |      |       |      |      |      |     |       |      |     | 100   | 117          |
| S11    | 23   | 20       | Chr          |        |       | 7.96  | 18.92 |       | 8.50  |       |      |     |       |      |       |      | 64.63 |      |      |      |     |       |      |     | 100   | 109          |
| S11    | 23   | 21       | Ap           |        |       |       |       |       |       | 49.10 |      |     | 44.17 |      | 5.31  |      |       |      |      |      |     |       | 1.41 |     | 100   | 127          |
| S11    | 24   | 1        | Mix          | 61.78  |       | 24.28 | 0.80  |       |       | 13.14 |      |     |       |      |       |      |       |      |      |      |     |       |      |     | 100   | 113          |
| S11    | 24   | 2        | Ilm          |        | 52.98 |       | 43.70 | 3.32  |       |       |      |     |       |      |       |      |       |      |      |      |     |       |      |     | 100   | 105          |

Table B6.2: EDS analyses of sample 11.

| Sample | Site | Position | Mineral                                | SiO2   | TiO2  | Al2O3 | FeO   | MnO  | MgO   | CaO   | Na2O | K2O  | P2O5  | SO3 | F    | V2O5 | Cr2O3 | CoO | NiO | CuO | ZnO | ZrO2  | HfO2 | WO3  | Total | Actual Total |
|--------|------|----------|----------------------------------------|--------|-------|-------|-------|------|-------|-------|------|------|-------|-----|------|------|-------|-----|-----|-----|-----|-------|------|------|-------|--------------|
| S11    | 24   | 3        | Ep                                     | 40.26  |       | 25.70 | 8.36  |      |       | 22.69 |      |      |       |     |      |      |       |     |     |     |     |       |      |      | 97    | 107          |
| S11    | 24   | 4        | Grt                                    | 39.32  |       | 20.42 | 29.91 | 1.79 | 1.30  | 7.26  |      |      |       |     |      |      |       |     |     |     |     |       |      |      | 100   | 111          |
| S11    | 24   | 5        | Ep                                     | 40.27  |       | 25.86 | 8.31  |      |       | 22.55 |      |      |       |     |      |      |       |     |     |     |     |       |      |      | 97    | 110          |
| S11    | 24   | 6        | Zrn                                    | 31.22  |       |       |       |      |       |       |      |      |       |     |      |      |       |     |     |     |     | 68.78 |      |      | 100   | 118          |
| S11    | 24   | 7        | Chr                                    |        |       | 17.60 | 18.85 |      | 12.69 |       |      |      |       |     |      | 0.33 | 50.52 |     |     |     |     |       |      |      | 100   | 111          |
| S11    | 24   | 8        | Qz                                     | 100.00 |       |       |       |      |       |       |      |      |       |     |      |      |       |     |     |     |     |       |      |      | 100   | 123          |
| S11    | 24   | 9        | Ttn                                    | 32.60  | 36.53 | 2.30  | 0.29  |      |       | 28.28 |      |      |       |     |      |      |       |     |     |     |     |       |      |      | 100   | 114          |
| S11    | 24   | 10       | Mix                                    | 20.91  |       | 8.06  | 56.36 | 1.19 | 0.90  | 0.93  | 1.22 | 0.79 | 3.02  |     |      |      |       |     |     |     |     |       | 6.63 |      | 100   | 84           |
| S11    | 24   | 11       | Ep                                     | 39.80  |       | 20.71 | 14.08 | 0.48 |       | 21.93 |      |      |       |     |      |      |       |     |     |     |     |       |      |      | 97    | 112          |
| S11    | 24   | 12       | Ep                                     | 40.40  |       | 28.25 | 5.30  |      |       | 23.06 |      |      |       |     |      |      |       |     |     |     |     |       |      |      | 97    | 112          |
| S11    | 24   | 13       | Chr                                    |        |       | 14.57 | 25.90 |      | 7.34  |       |      |      |       |     |      | 0.45 | 51.73 |     |     |     |     |       |      |      | 100   | 110          |
| S11    | 24   | 14       | Ttn                                    | 34.76  | 30.94 | 3.59  | 4.27  |      | 1.99  | 24.44 |      |      |       |     |      |      |       |     |     |     |     |       |      |      | 100   | 108          |
| S11    | 24   | 15       | Chr                                    |        |       | 16.74 | 21.75 |      | 9.70  |       |      |      |       |     |      |      | 51.80 |     |     |     |     |       |      |      | 100   | 110          |
| S11    | 24   | 16       | Ap +                                   | 7.87   |       | 3.80  | 1.36  |      | 0.60  | 42.55 | 0.32 | 0.42 | 34.60 |     | 5.80 |      |       |     |     |     |     |       |      | 2.67 | 100   | 113          |
| S11    | 24   | 17       | Feohy                                  |        | 11.86 | 3.33  | 80.39 | 0.50 | 2.79  |       |      |      |       |     |      | 1.12 |       |     |     |     |     |       |      |      | 100   | 100          |
| S11    | 24   | 18       | Ep                                     | 39.98  |       | 22.67 | 11.67 |      |       | 22.68 |      |      |       |     |      |      |       |     |     |     |     |       |      |      | 97    | 110          |
| S11    | 24   | 19       | Grt                                    | 39.05  | 0.27  | 20.74 | 30.56 | 1.45 | 1.15  | 6.76  |      |      |       |     |      |      |       |     |     |     |     |       |      |      | 100   | 111          |
| S11    | 24   | 20       | Ep                                     | 39.99  |       | 24.41 | 10.27 |      |       | 22.32 |      |      |       |     |      |      |       |     |     |     |     |       |      |      | 97    | 108          |
| S11    | 24   | 21       | Ilm                                    |        | 52.26 |       | 46.19 | 1.55 |       |       |      |      |       |     |      |      |       |     |     |     |     |       |      |      | 100   | 107          |
| S11    | 24   | 22       | Chr                                    |        |       | 22.34 | 18.43 |      | 11.71 |       |      |      |       |     |      | 0.46 | 47.06 |     |     |     |     |       |      |      | 100   | 113          |
|        |      |          |                                        |        |       |       |       |      |       |       |      |      |       |     |      |      |       |     |     |     |     |       |      |      |       |              |
|        |      |          |                                        |        |       |       |       |      |       |       |      |      |       |     |      |      |       |     |     |     |     |       |      |      |       |              |
|        |      | Notes    |                                        |        |       |       |       |      |       |       |      |      |       |     |      |      |       |     |     |     |     |       |      |      |       |              |
|        |      | " "      | = indicates that mineral is altered    |        |       |       |       |      |       |       |      |      |       |     |      |      |       |     |     |     |     |       |      |      |       |              |
|        |      | +        | = indicates other minerals are present |        |       |       |       |      |       |       |      |      |       |     |      |      |       |     |     |     |     |       |      |      |       |              |
|        |      |          |                                        |        |       |       |       |      |       |       |      |      |       |     |      |      |       |     |     |     |     |       |      |      |       |              |
|        |      |          |                                        |        |       |       |       |      |       |       |      |      |       |     |      |      |       |     |     |     |     |       |      |      |       |              |
|        |      |          |                                        |        |       |       |       |      |       |       |      |      |       |     |      |      |       |     |     |     |     |       |      |      |       |              |

B7: SEM-BSE images and EDS  
mineral analyses for sample S12.

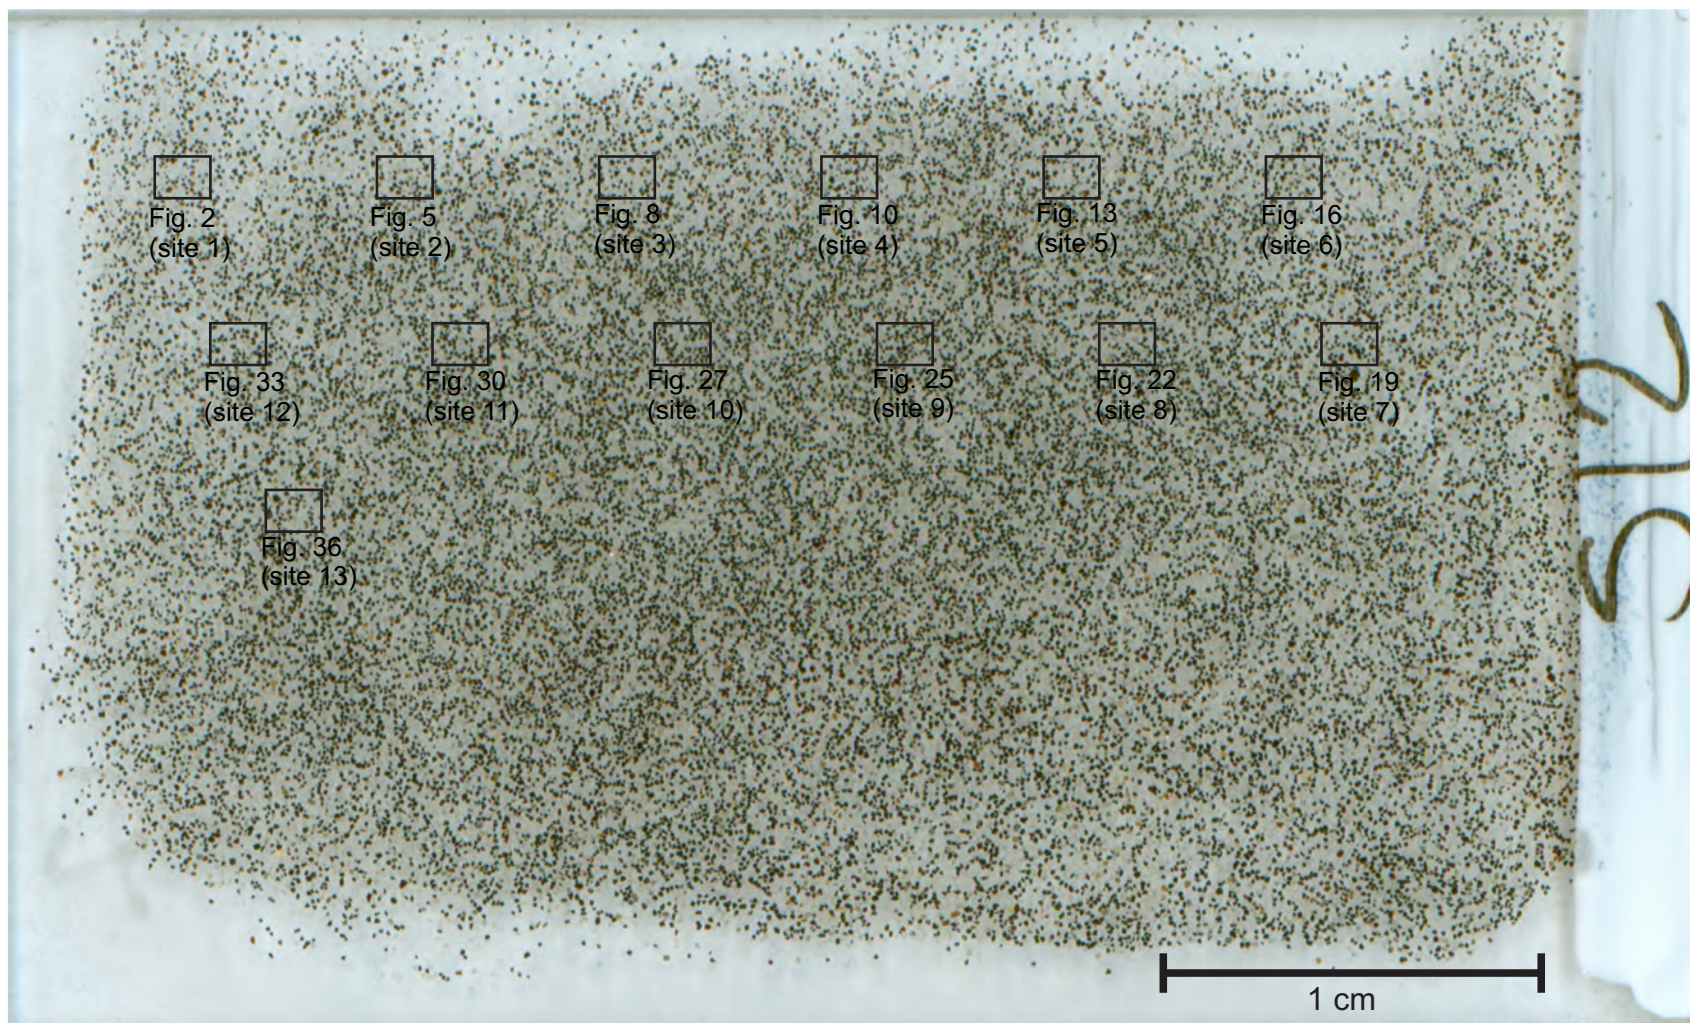

Figure B7.1: Scanned thin section of sample S12 showing the location of analysed sites. This sample comes from a wide sandy beach with scraffy dunes, and consists of fine sands with heavy minerals.



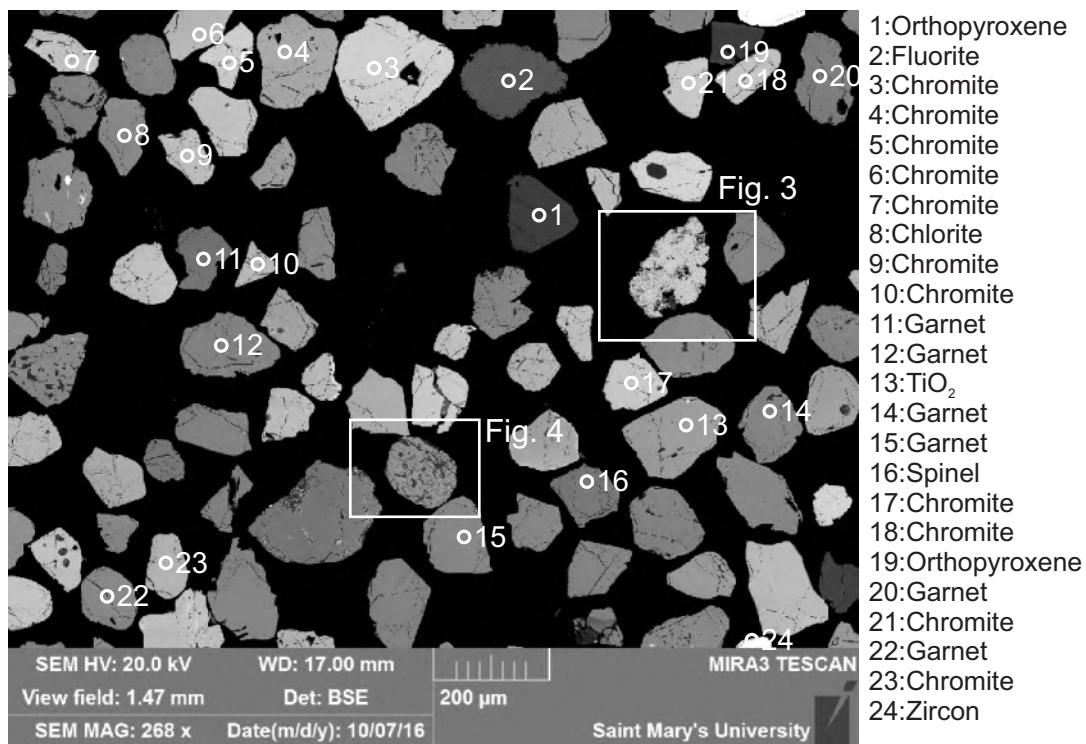

Figure B7.2: Sample S12 site 1 (SEM).

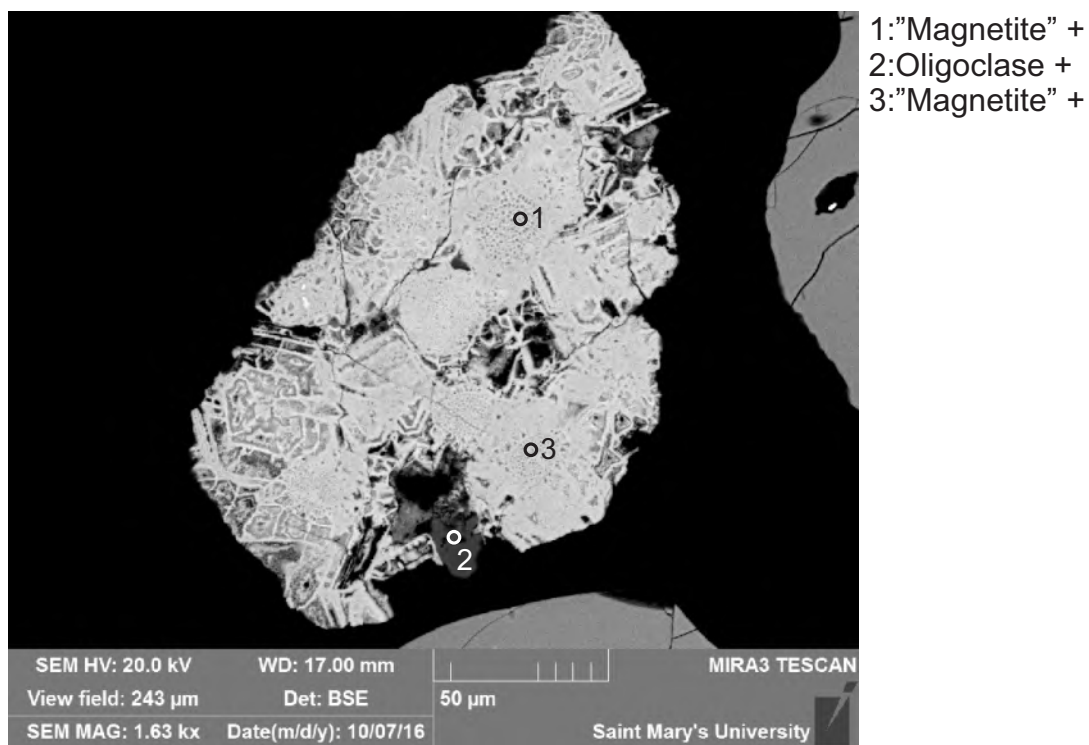

Figure B7.3: Sample S12 site 1.2 (SEM). Lithic clast consisting of oligoclase + magnetite. Igneous.



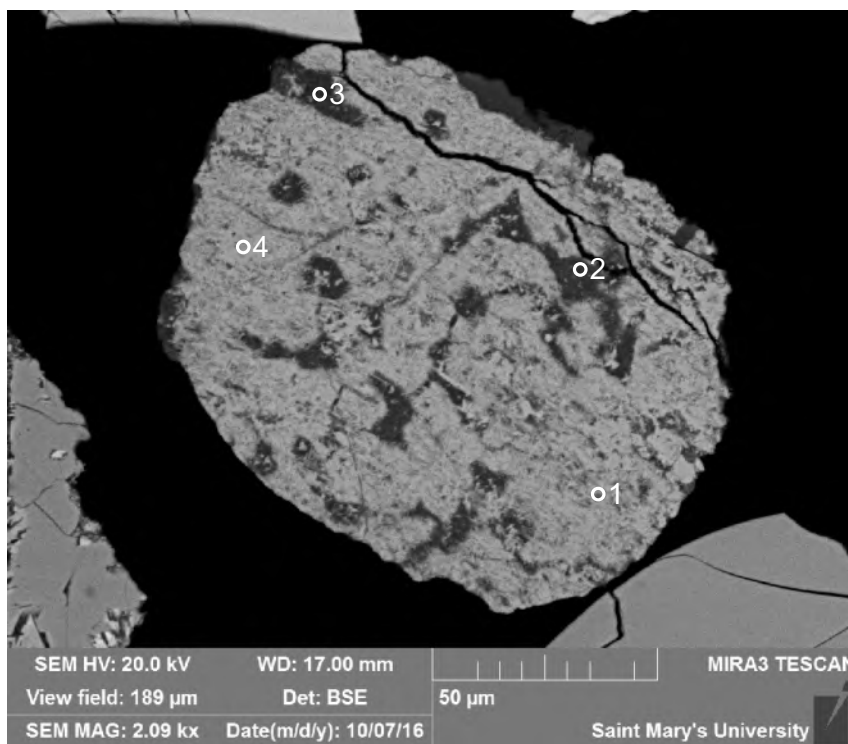

- 1:TiO<sub>2</sub> +
- 2:Quartz +
- 3:Quartz +
- 4:TiO<sub>2</sub> +

Figure B7.4: Sample S12 site 1.3 (SEM). Lithic clast consisting of quartz + titania. Metamorphic.

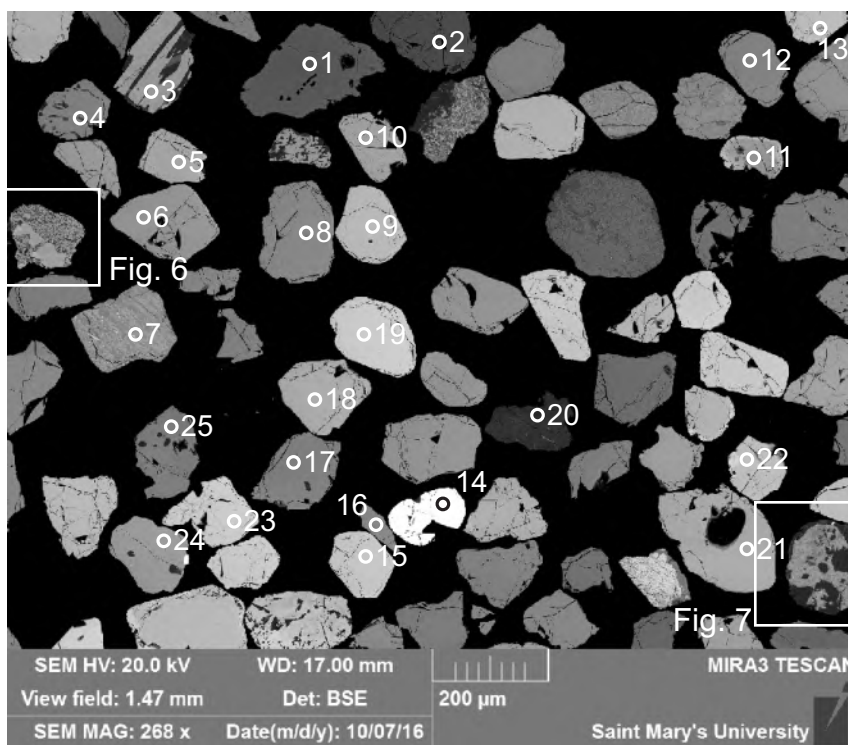

- 1:Fluorite
- 2:Staurolite
- 3:TiO<sub>2</sub>
- 4: ?Garnet
- 5:Chromite
- 6:Spinel
- 7:Titanite +
- 8:Garnet
- 9:Chromite
- 10:Spinel
- 11:Chromite
- 12:Garnet
- 13:Chromite
- 14:Zircon
- 15:Chromite
- 16:Garnet
- 17:Garnet
- 18:Chromite
- 19:Chromite
- 20:Quartz +
- 21:Chromite
- 22:Chromite
- 23:Chromite
- 24:TiO<sub>2</sub>
- 25:Garnet

Figure B7.5: Sample S12 site 2 (SEM).

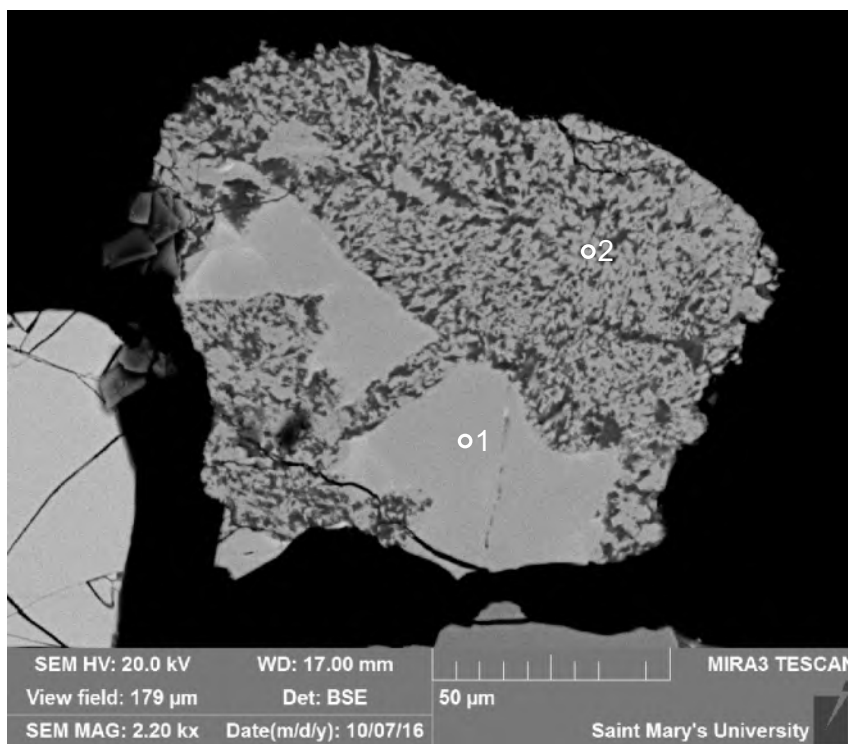

1:TiO<sub>2</sub>  
2:TiO<sub>2</sub> +

Figure B7.6: Sample S12 site 2.2 (SEM). Clast of partially dissolved titania.

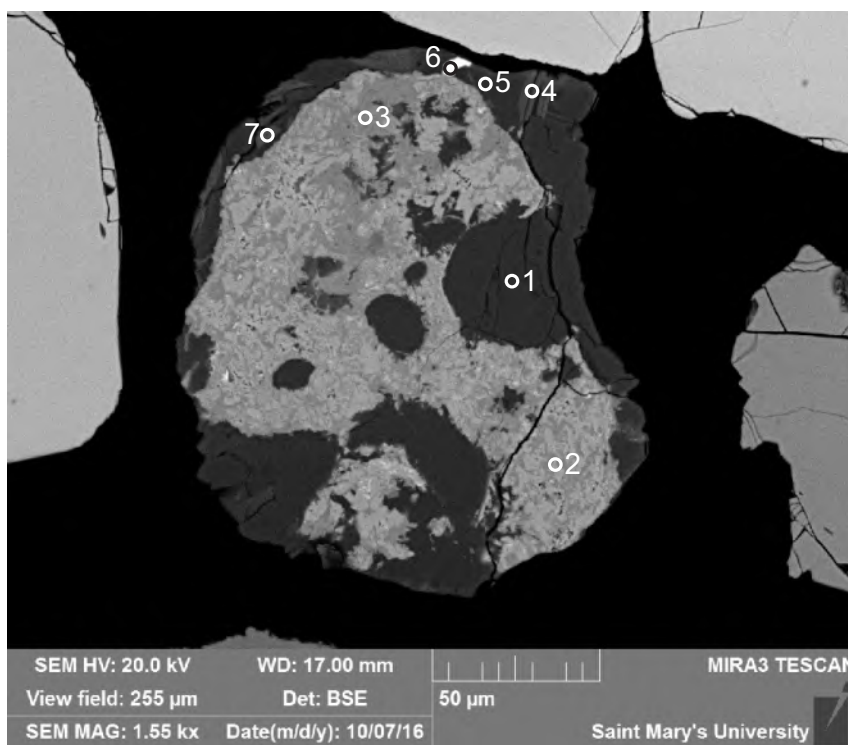

1:Quartz  
2:TiO<sub>2</sub> +  
3:Titanite +  
4:Muscovite  
5:Albite  
6:Zircon  
7:Muscovite +

Figure B7.7: Sample S12 site 2.3 (SEM). Lithic clast consisting of quartz + albite + muscovite + titanite + titania + zircon. Metamorphic.

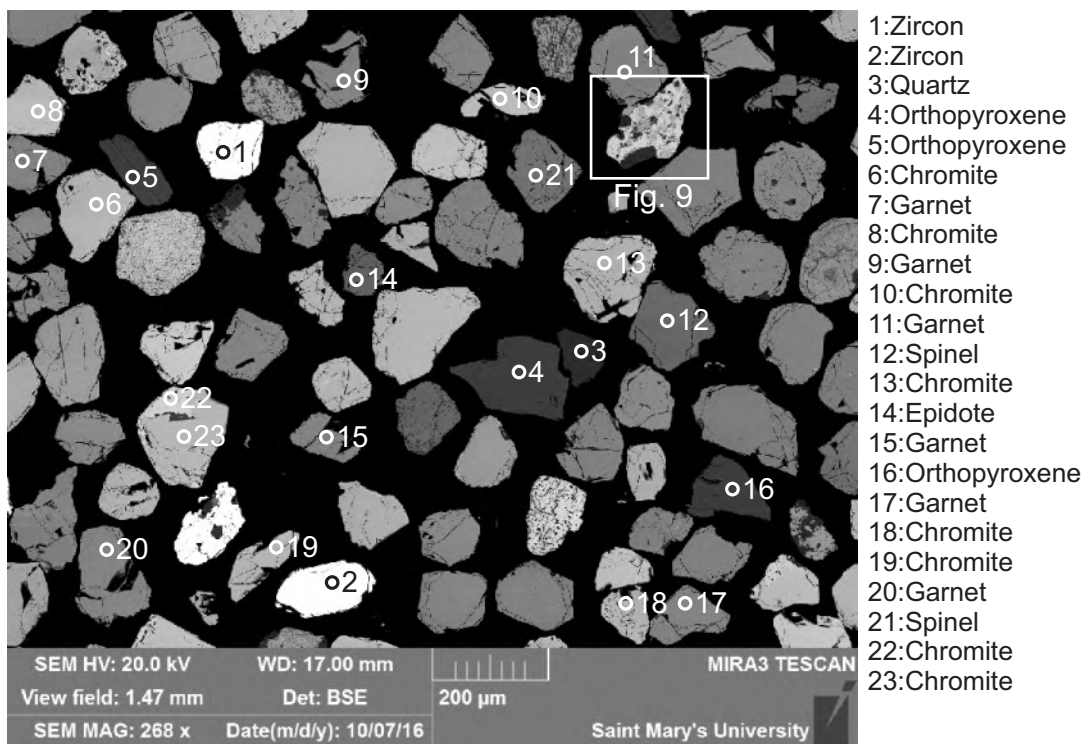

Figure B7.8: Sample S12 site 3 (SEM).

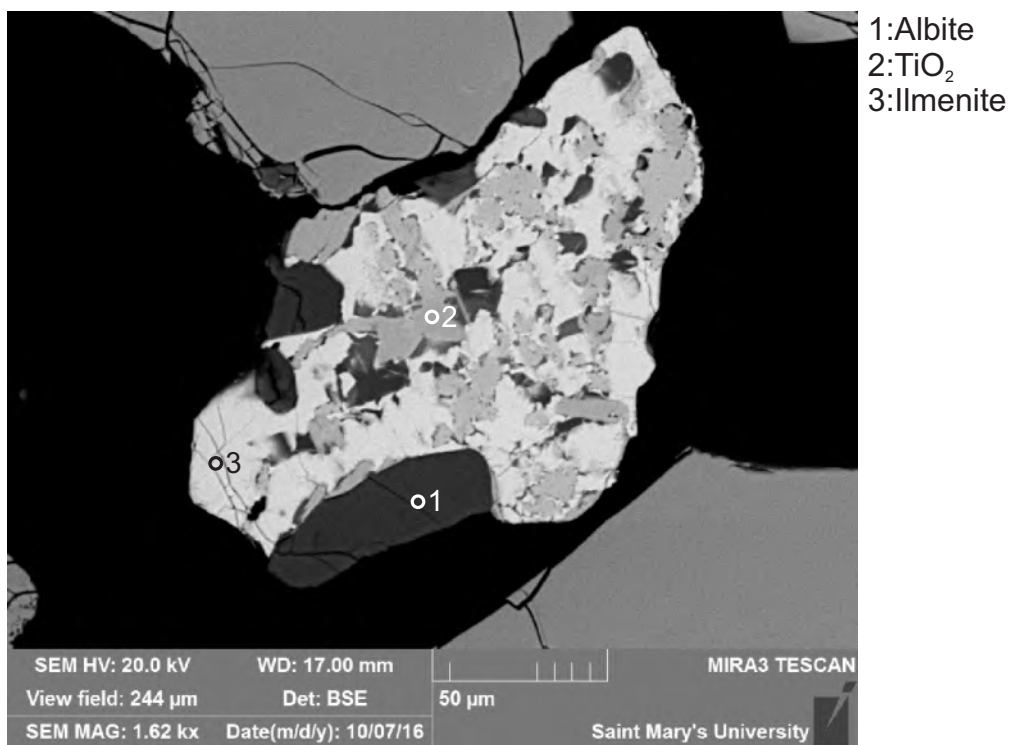

Figure B7.9: Sample S12 site 3.2 (SEM). Lithic clast consisting of albite + ilmenite + titania. Metamorphic.



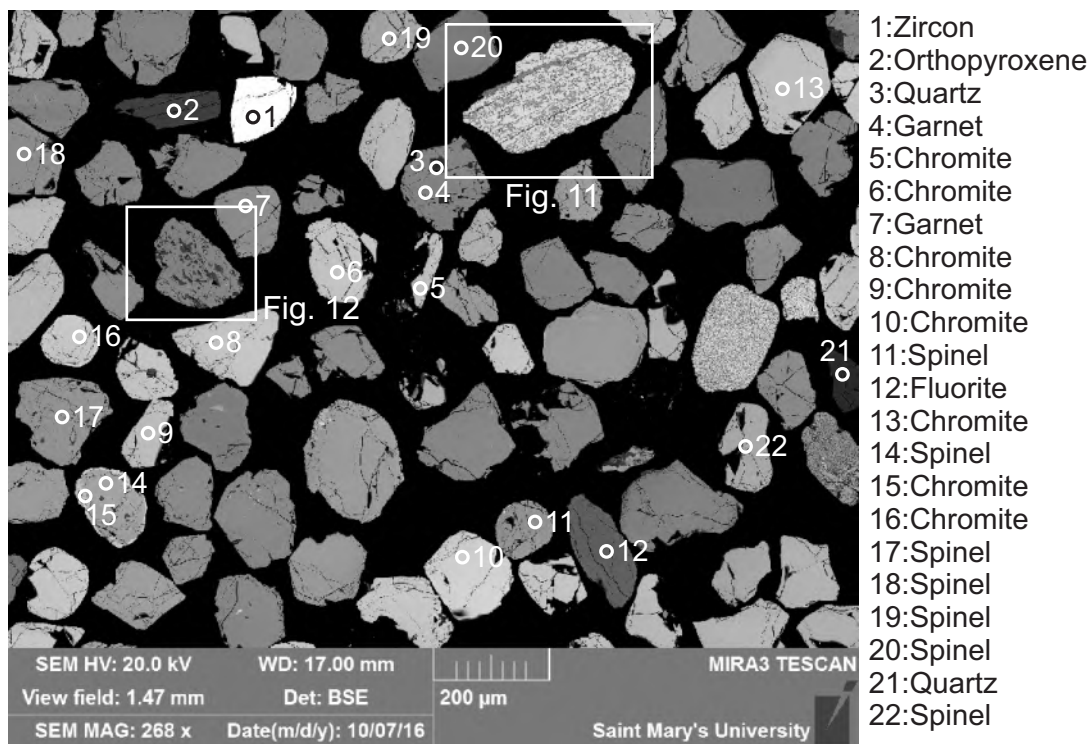

Figure B7.10: Sample S12 site 4 (SEM).

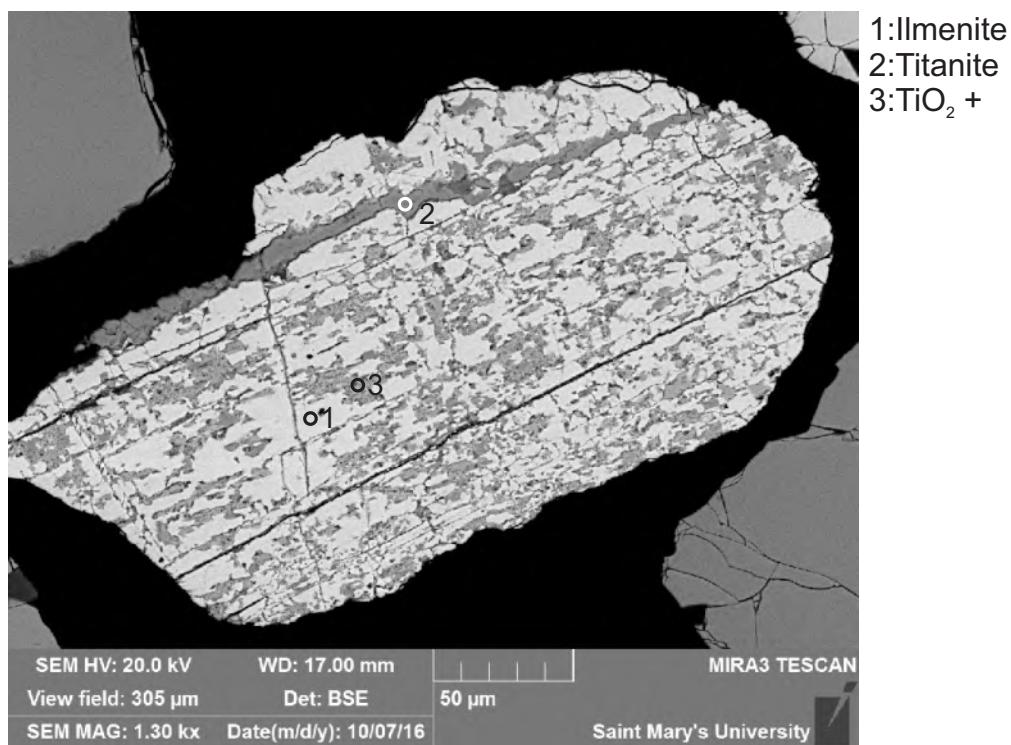

Figure B7.11: Sample S12 site 4.2 (SEM). Detrital ilmenite grain (altered).

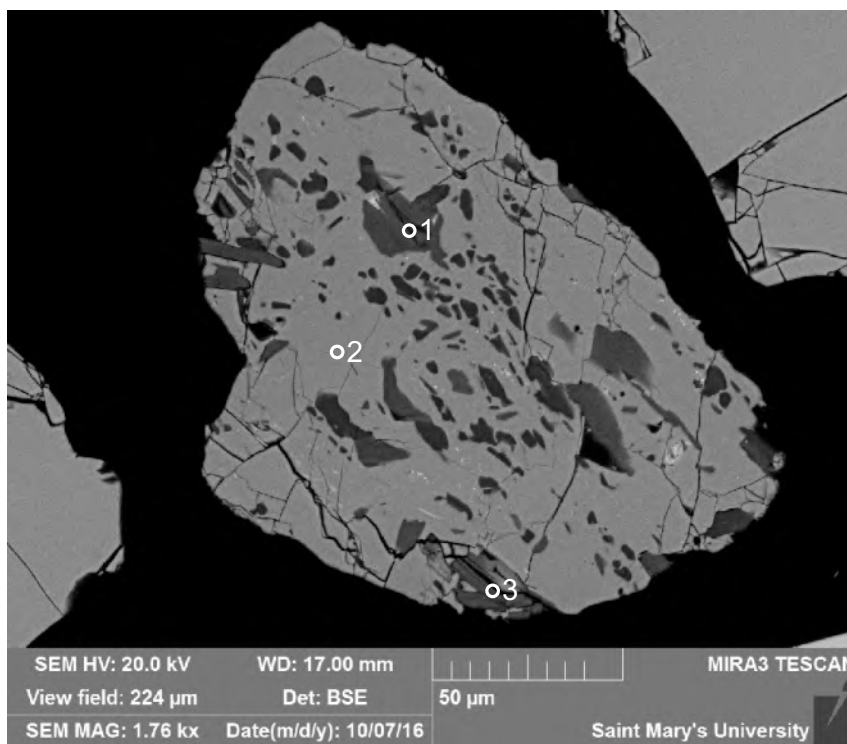

- 1:Muscovite +
- 2:Titanite
- 3:Muscovite

Figure B7.12: Sample S12 site 4.3 (SEM). Lithic clast consisting of titanite + muscovite + K-feldspar. Metamorphic.

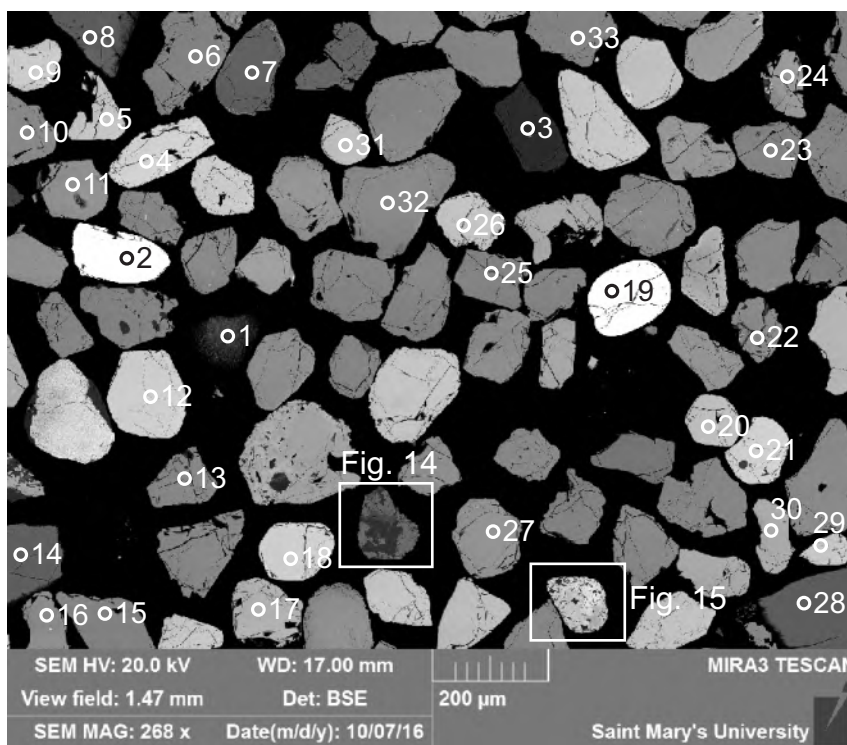

- 1:Fluorite
- 2:Zircon
- 3:Quartz
- 4:Chromite
- 5:Chromite
- 6:Garnet
- 7:Spinel
- 8:Fluorite
- 9:Chromite
- 10:Spinel
- 11:Garnet
- 12:Chromite
- 13:Garnet
- 14:Fluorite
- 15:Spinel
- 16:Garnet
- 17:Chromite
- 18:Chromite
- 19:Zircon
- 20:Chromite +
- 21:Chromite
- 22:Garnet
- 23:Garnet
- 24:Spinel
- 25:Garnet
- 26:Chromite
- 27:Garnet
- 28:Fluorite
- 29:Chromite
- 30:Chromite
- 31:Chromite
- 32:Spinel
- 33:Garnet

Figure B7.13: Sample S12 site 5 (SEM).



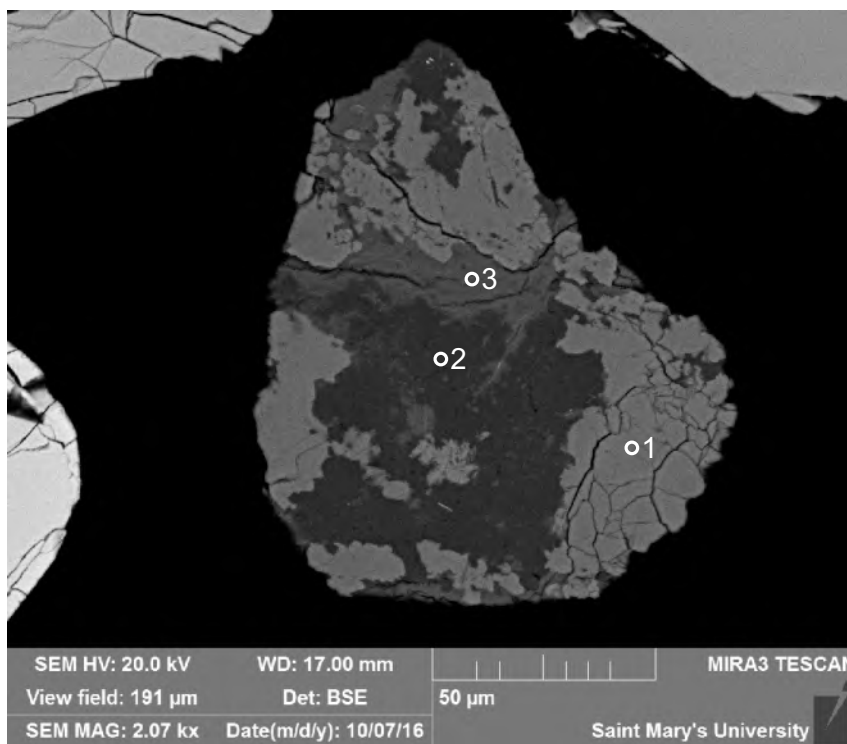

- 1:Epidote
- 2:Quartz +
- 3:Chlorite

Figure B7.14: Sample S12 site 5.2 (SEM). Lithic clast consisting of quartz + chlorite + epidote. Hydrothermal.

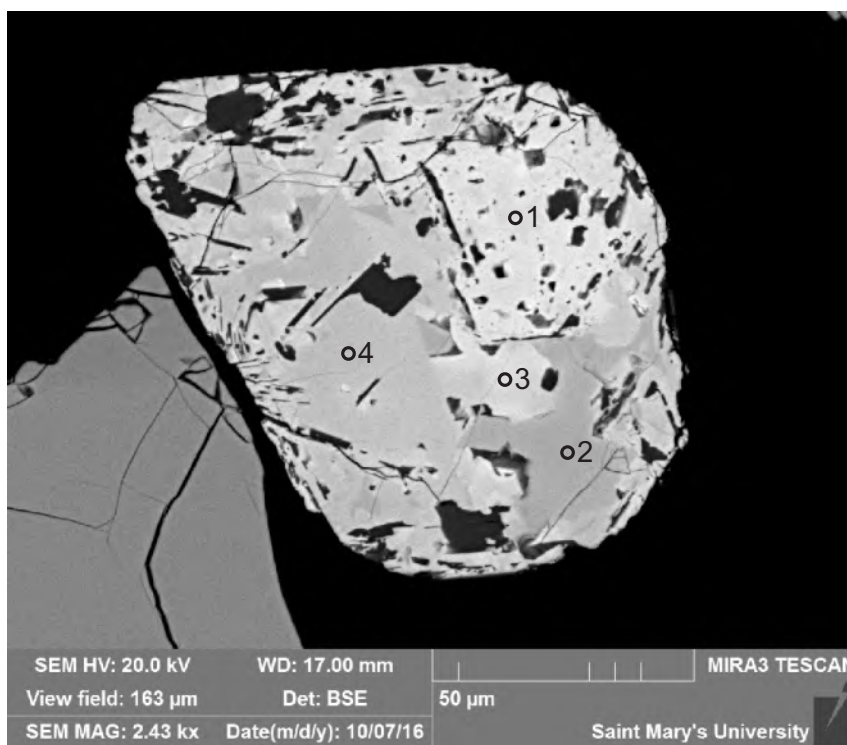

- 1:Chromite
- 2:Chromite
- 3:Chromite
- 4:Chromite

Figure B7.15: Sample S12 site 5.3 (SEM). Patchy chromite grain.

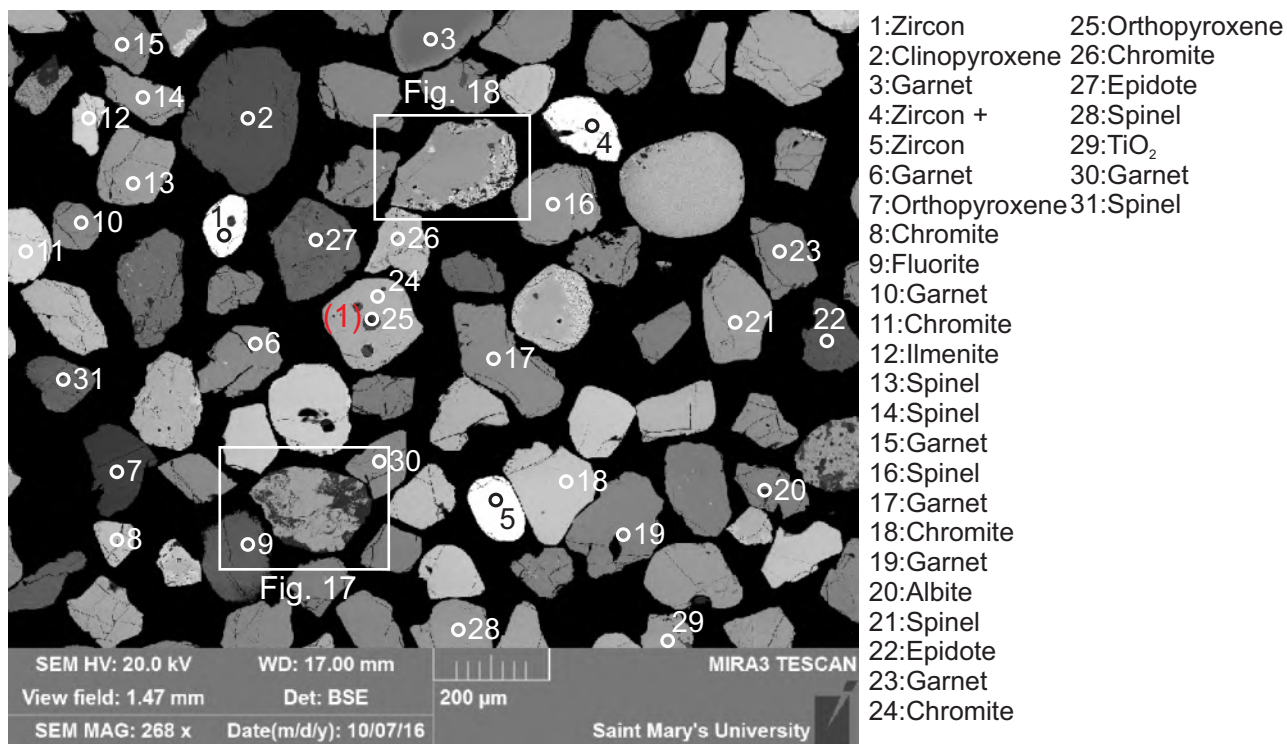

Figure B7.16: Sample S12 site 6 (SEM). 1: Lithic clast (spinel + orthopyroxene, ophiolite or metaophiolite).

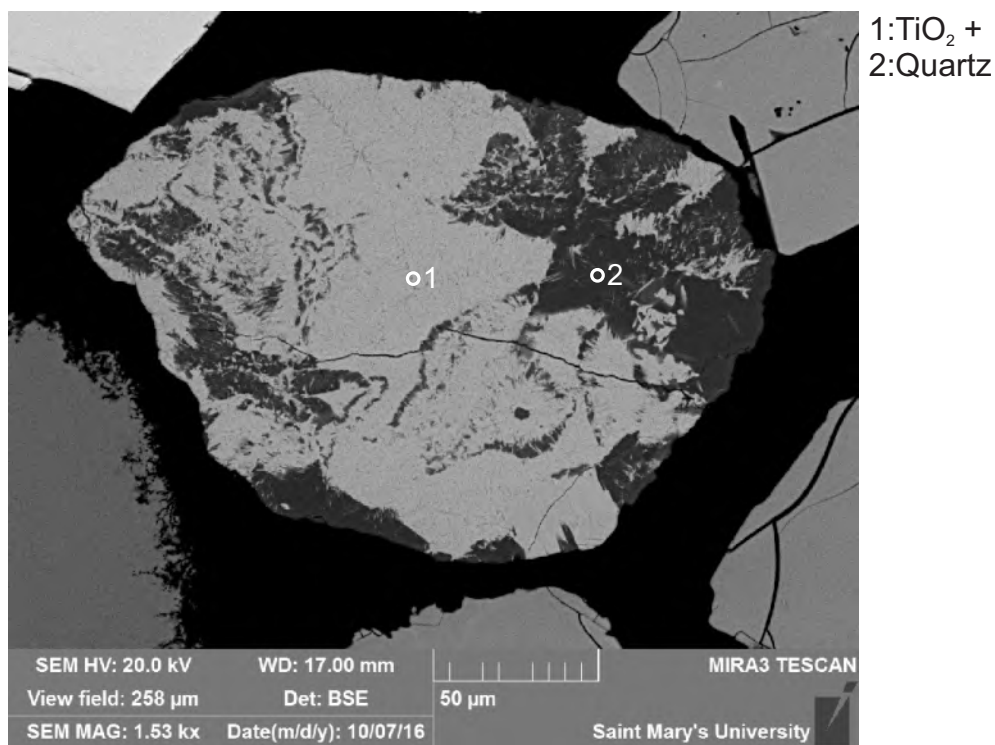

Figure B7.17: Sample S12 site 6.2 (SEM). Lithic clast consisting of quartz + titania. Texture appears hydrothermal.

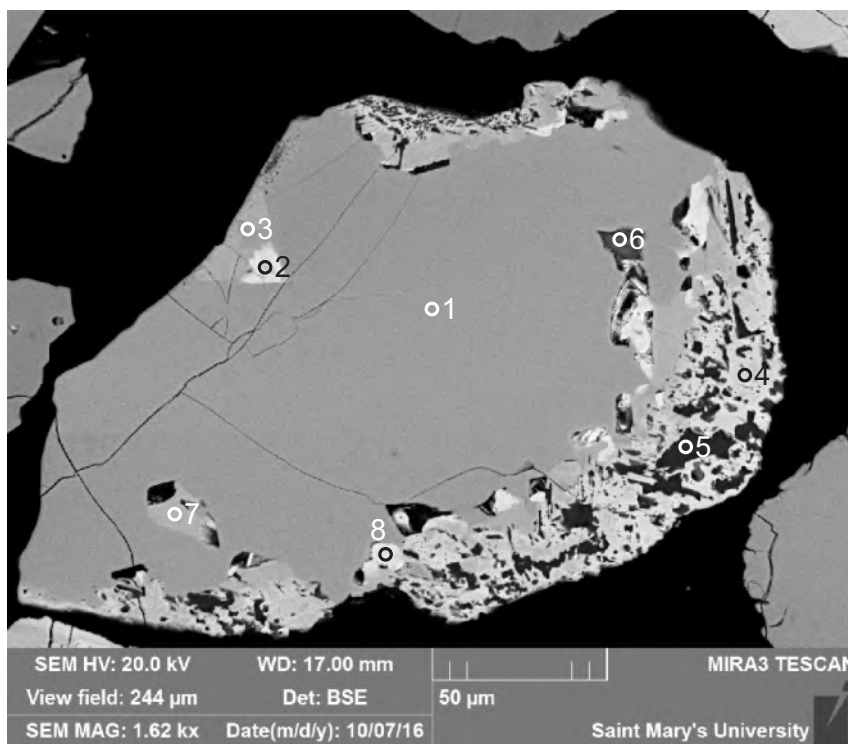

- 1: Spinel
- 2: "Chromite"
- 3: Spinel
- 4: Chromite
- 5: Cr-Chlorite
- 6: Cr-Chlorite
- 7: Chromite
- 8: Spinel

Figure B7.18: Sample S12 site 6.3 (SEM). Lithic clast consisting of spinel + chromite altering to Cr-chlorite. Ophiolite or metaophiolite.

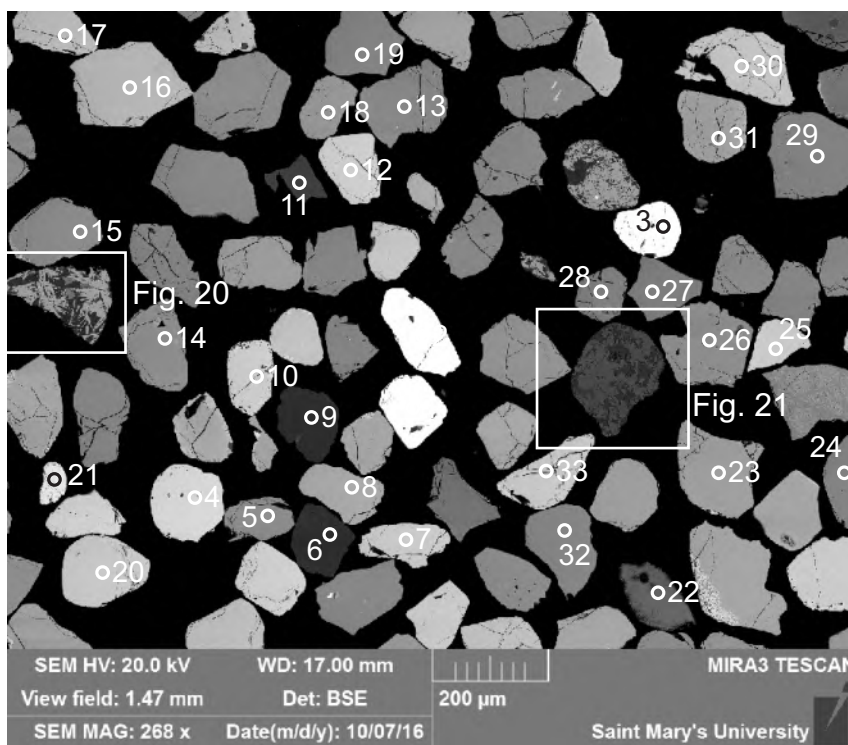

- 1: Zircon
- 2: Zircon
- 3: Zircon
- 4: Ilmenite
- 5: Garnet
- 6: Quartz
- 7: Chromite
- 8:  $\text{TiO}_2 +$
- 9: Quartz
- 10: Chromite
- 11: Orthopyroxene
- 12: Chromite
- 13: Garnet
- 14: Garnet
- 15: Spinel
- 16: Chromite
- 17: Chromite
- 18: Chromite
- 19: Garnet
- 20: Chromite
- 21: Ilmenite
- 22: Fluorite
- 23: Spinel
- 24: Garnet
- 25: Chromite
- 26: Chromite
- 27: Spinel
- 28: ?
- 29: Spinel
- 30: Chromite
- 31: Spinel
- 32: Garnet
- 33: Chromite

Figure B7.19: Sample S12 site 7 (SEM).

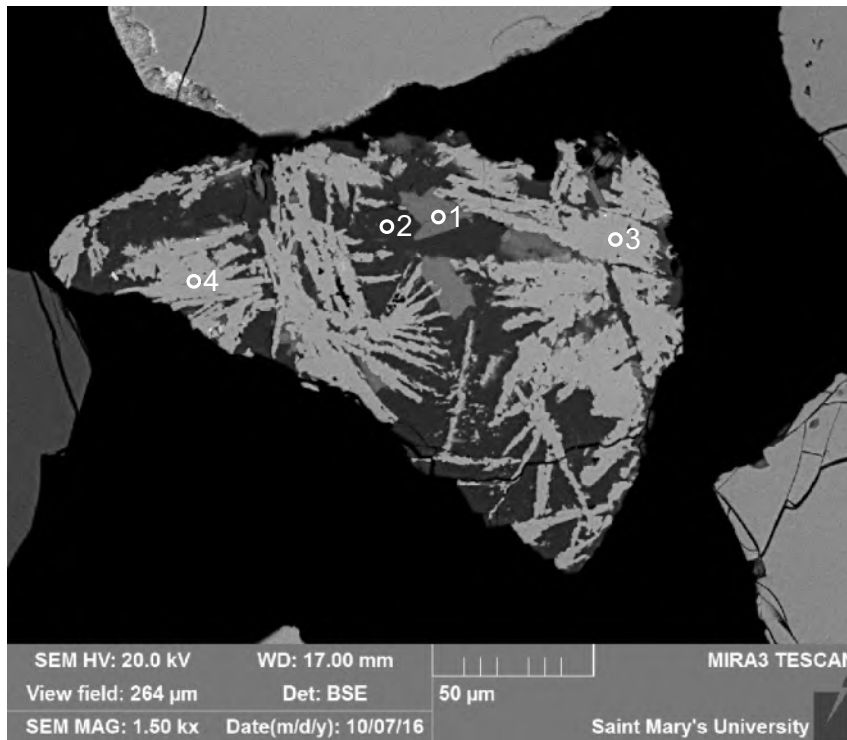

- 1: Biotite
- 2: Quartz
- 3:  $\text{TiO}_2$
- 4:  $\text{TiO}_2$  +

Figure B7.20: Sample S12 site 7.2 (SEM). Lithic clast consisting of biotite + quartz + titania as needles. Check significance of texture.

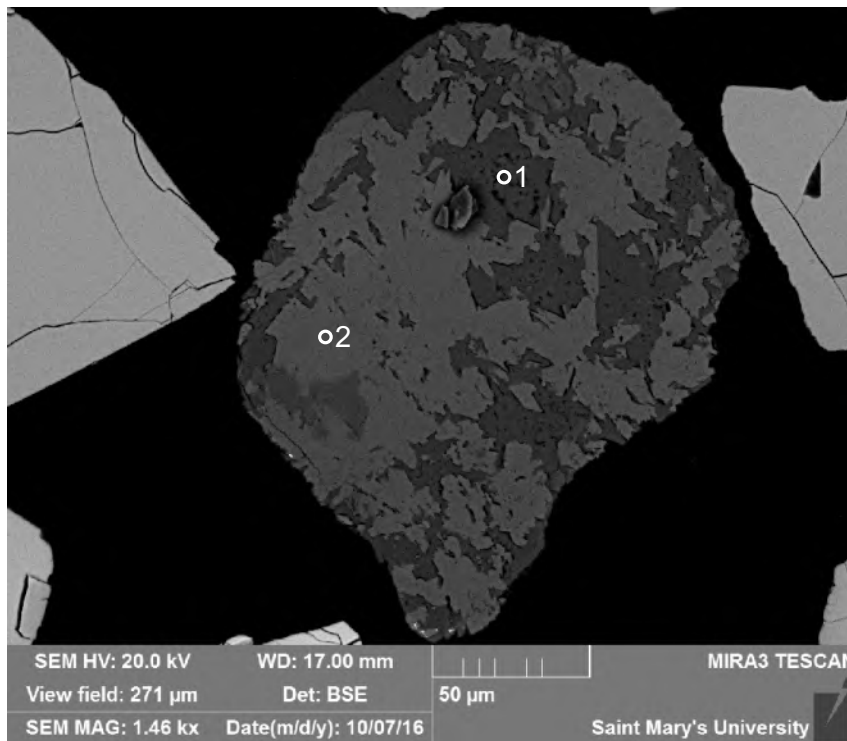

- 1: Albite
- 2: Epidote

Figure B7.21: Sample S12 site 7.3 (SEM). Lithic clast consisting of albite + epidote. Hydrothermal.



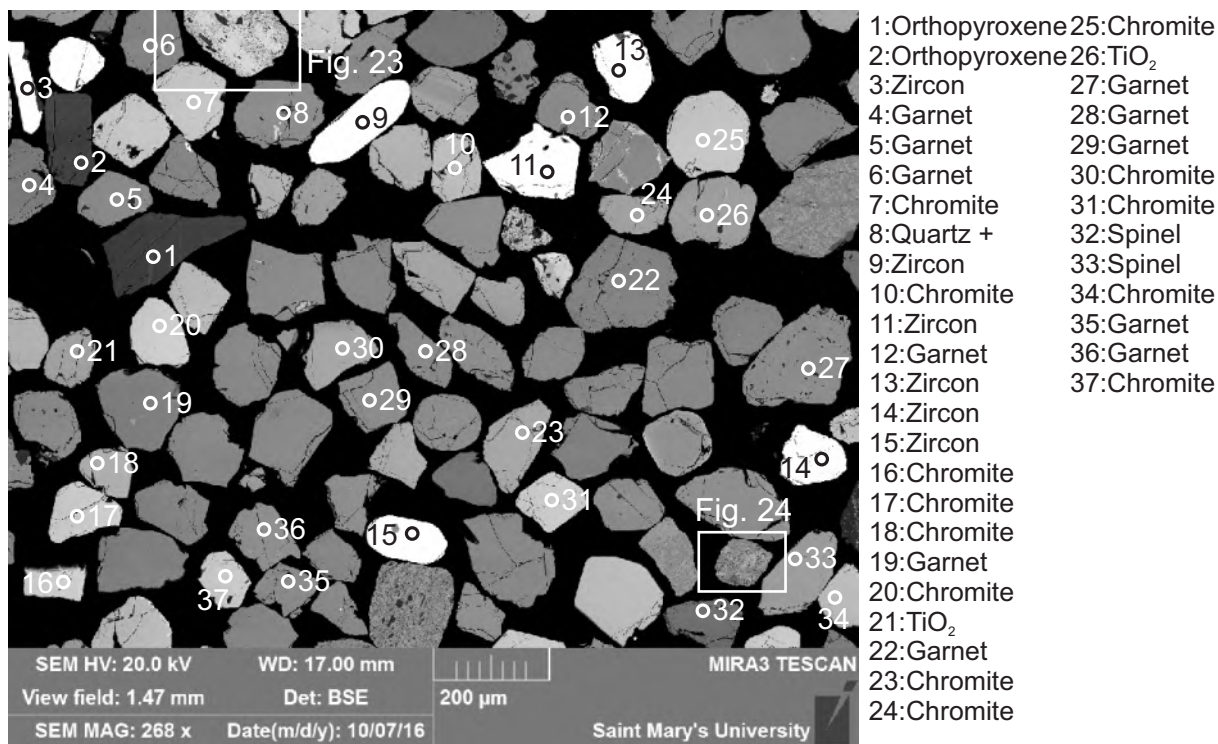

Figure B7.22: Sample S12 site 8 (SEM).

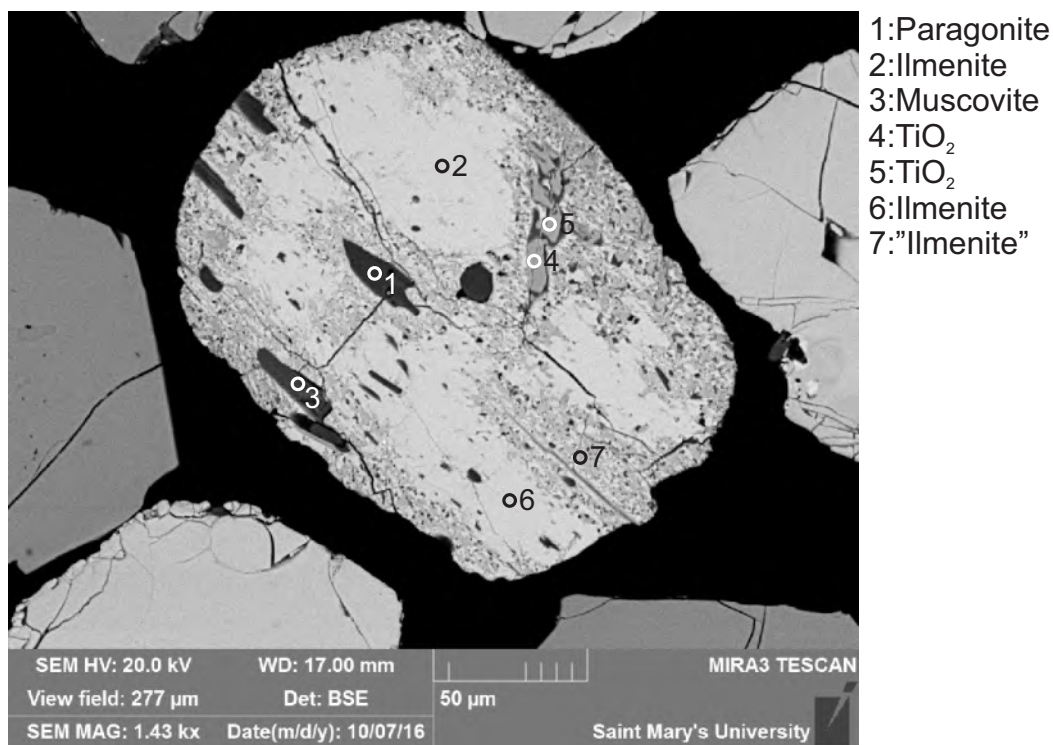

Figure B7.23: Sample S12 site 8.2 (SEM). Lithic clast consisting of altered ilmenite + paragonite + muscovite. Metamorphic.

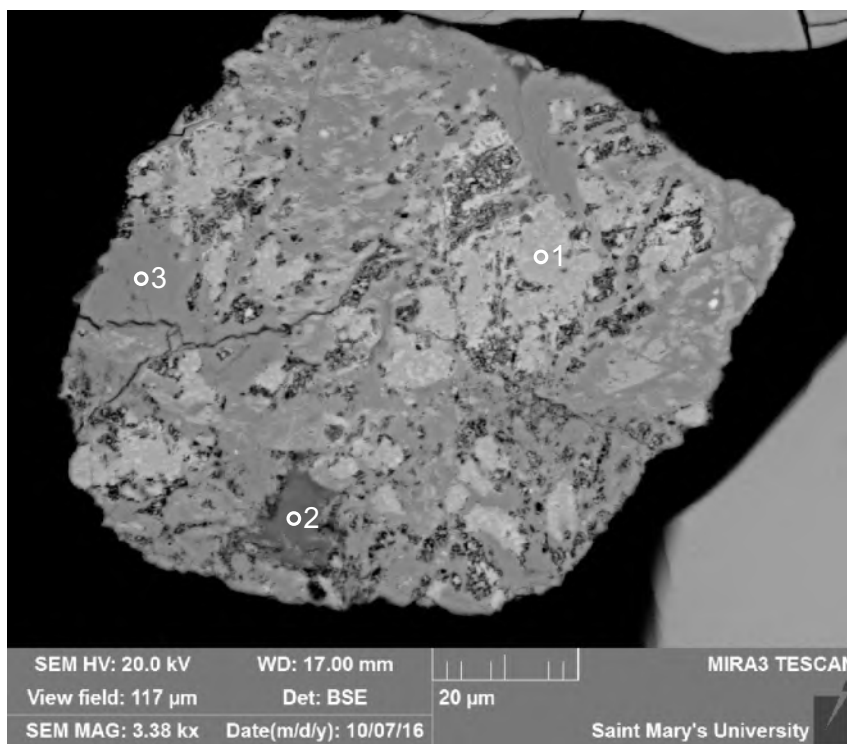

- 1:TiO<sub>2</sub>
- 2:Chlorite +
- 3:Titanite

Figure B7.24: Sample S12 site 8.3 (SEM). Lithic clast consisting of titania + titanite + chlorite. Metamorphic.

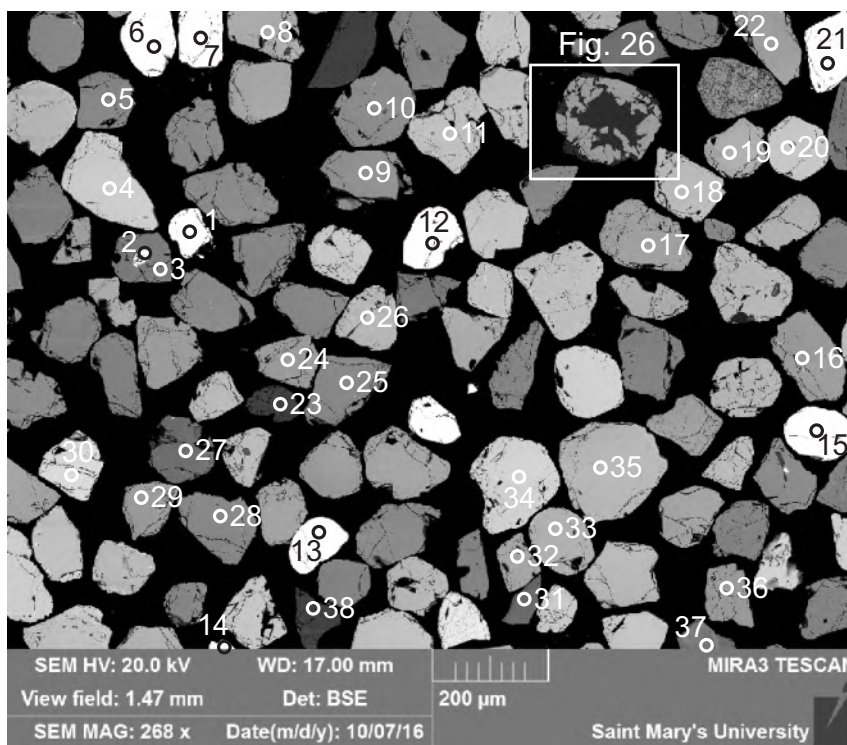

- 1:Zircon
- 2:Pyrrhotite
- 3:Garnet
- 4:Chromite
- 5:Garnet
- 6:Zircon
- 7:Zircon
- 8:Chromite
- 9:Spinel
- 10:Garnet
- 11:Chromite
- 12:Zircon
- 13:Zircon
- 14:Zircon
- 15:Zircon
- 16:TiO<sub>2</sub>
- 17:Spinel
- 18:Chromite
- 19:Chromite
- 20:Mix
- 21:Zircon
- 22:Spinel
- 23:Orthopyroxene
- 24:Spinel
- 25:Garnet
- 26:Chromite
- 27:Garnet
- 28:Garnet
- 29:Spinel
- 30:Ilmenite
- 31:Spinel
- 32:Chromite
- 33:Chromite
- 34:Chromite
- 35:Chromite
- 36:Spinel
- 37:Epidote
- 38:Orthopyroxene

Figure B7.25: Sample S12 site 9 (SEM).

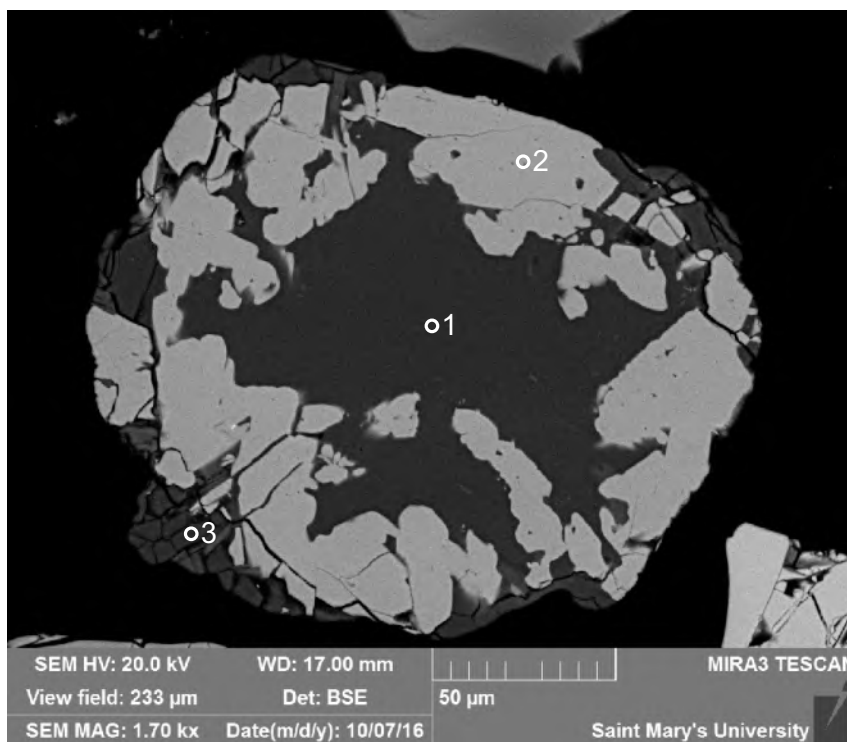

- 1:Quartz
- 2:TiO<sub>2</sub>
- 3:Quartz

Figure B7.26: Sample S12 site 9.2 (SEM). Lithic clast consisting of quartz + titania. Hydrothermal.

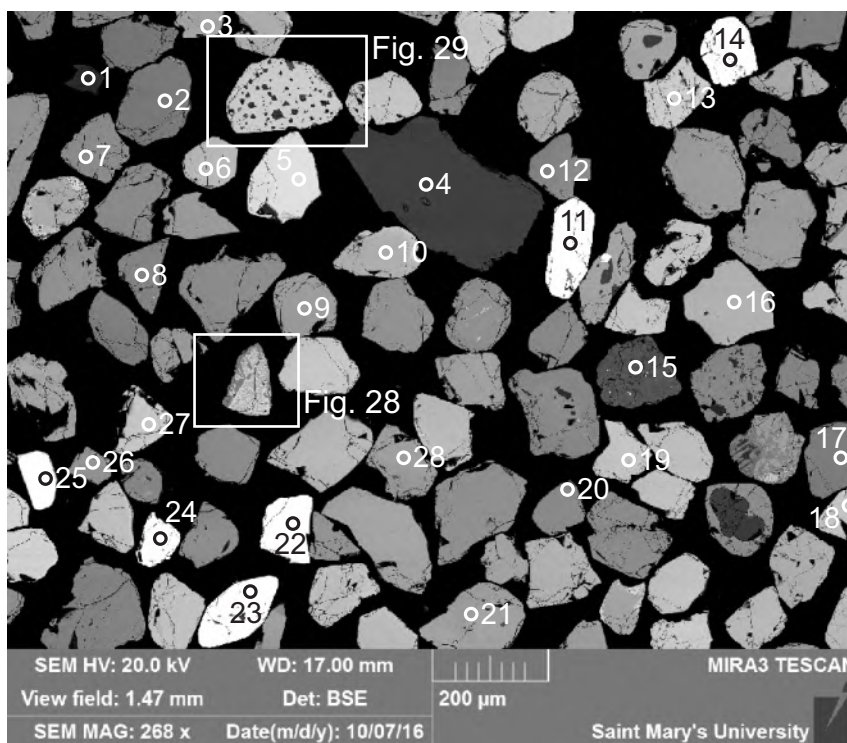

- 1:Quartz
- 2:Spinel
- 3:Chromite
- 4:Orthopyroxene
- 5:Chromite
- 6:Spinel
- 7:Garnet
- 8:Garnet
- 9:Spinel
- 10:Chromite
- 11:Zircon
- 12:Spinel
- 13:Chromite
- 14:Zircon
- 15:Amphibole
- 16:Spinel
- 17:Spinel
- 18:Chromite
- 19:Chromite
- 20:Spinel
- 21:Spinel
- 22:Zircon
- 23:Zircon
- 24:Zircon
- 25:Zircon
- 26:Spinel
- 27:Chromite
- 28:Spinel

Figure B7.27: Sample S12 site 10 (SEM).



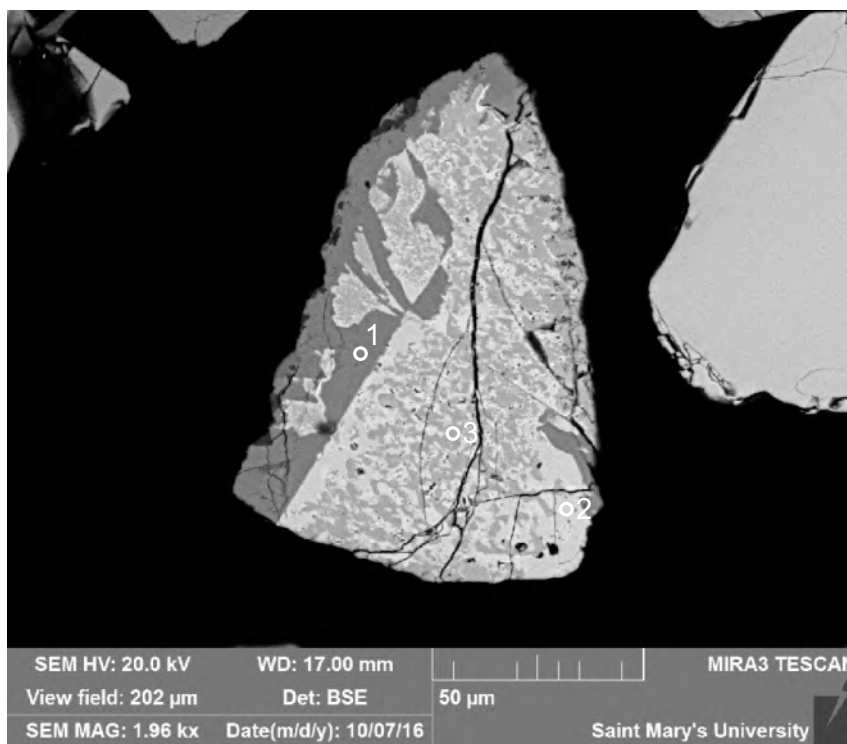

Figure B7.28: Sample S12 site 10.2 (SEM). Lithic clast consisting of titanite + titania + ilmenite. Metamorphic.

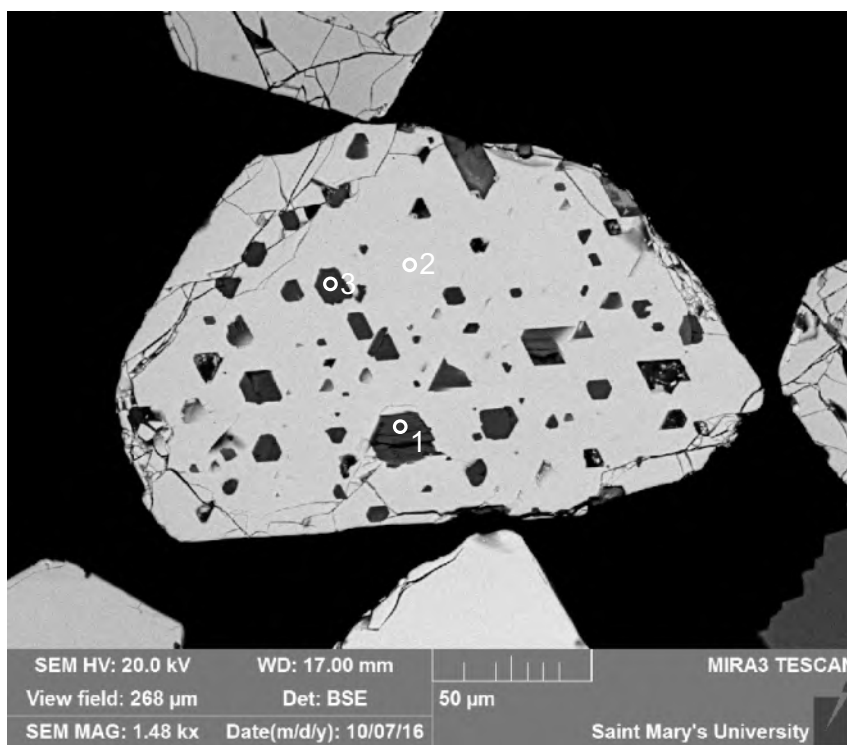

Figure B7.29: Sample S12 site 10.3 (SEM). Lithic clast composed of chromite with inclusions of ?mica.



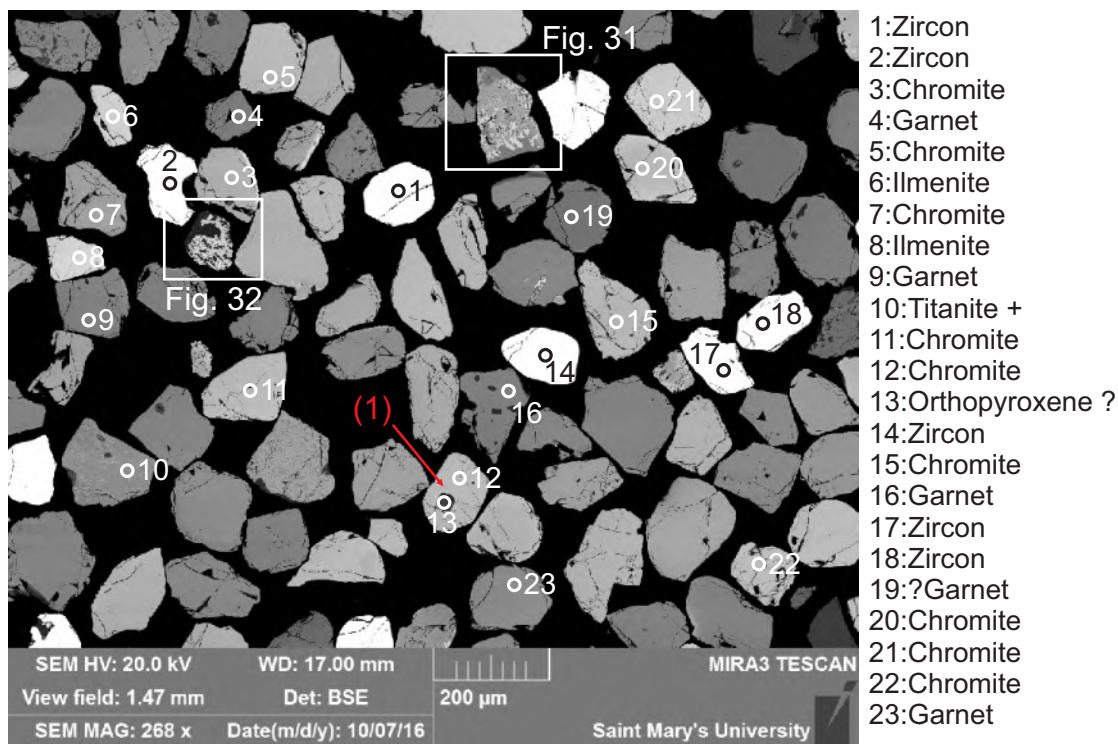

Figure B7.30: Sample S12 site 11 (SEM). 1: Lithic clast (chromite + orthopyroxene, ophiolite).

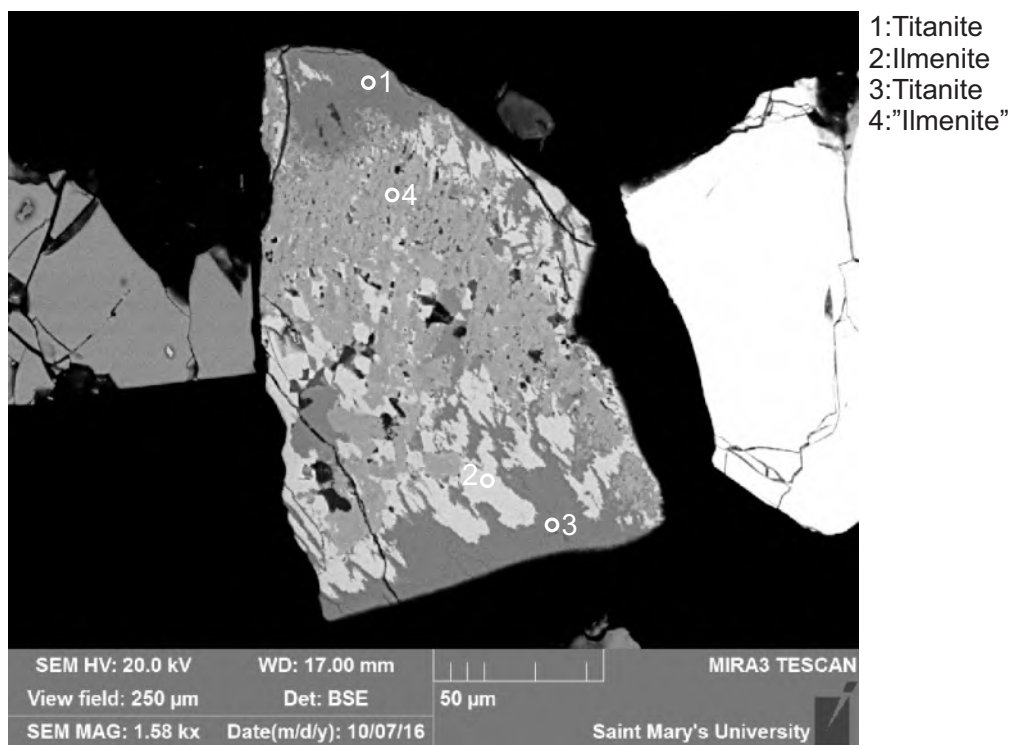

Figure B7.31: Sample S12 site 11.2 (SEM). Clast consisting of titanite + ilmenite. Altered ilmenite grain.

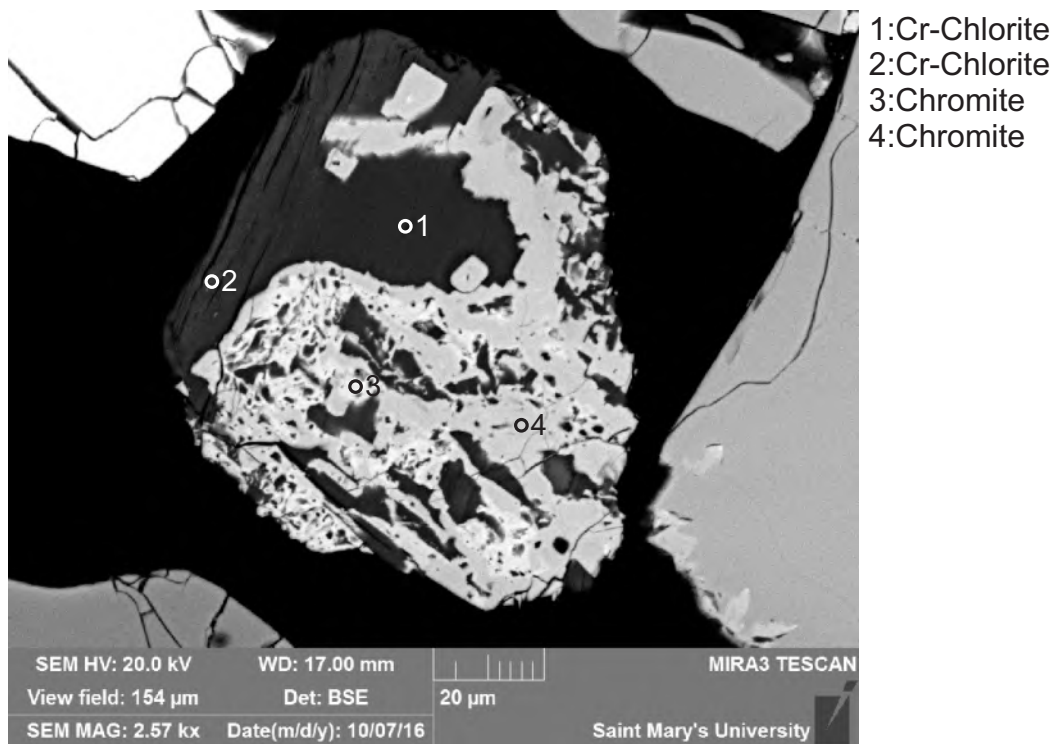

Figure B7.32: Sample S12 site 11.3 (SEM). Lithic clast consisting of Cr-chlorite + chromite. Metaophiolite.

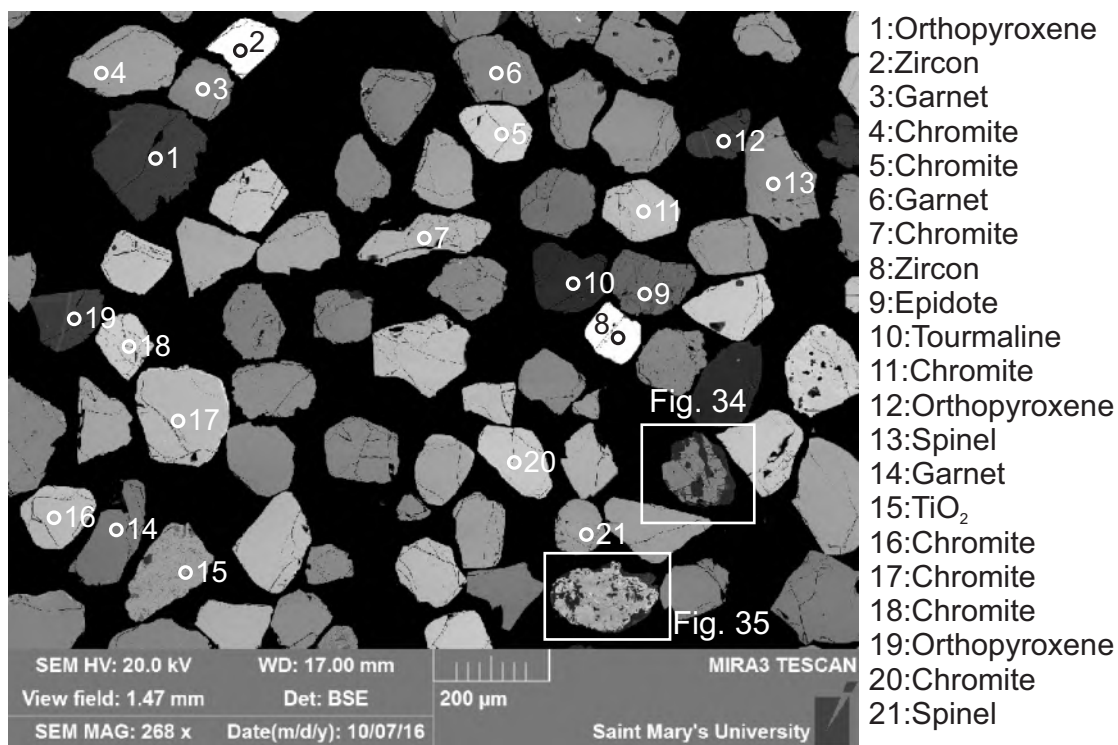

Figure B7.33: Sample S12 site 12 (SEM).

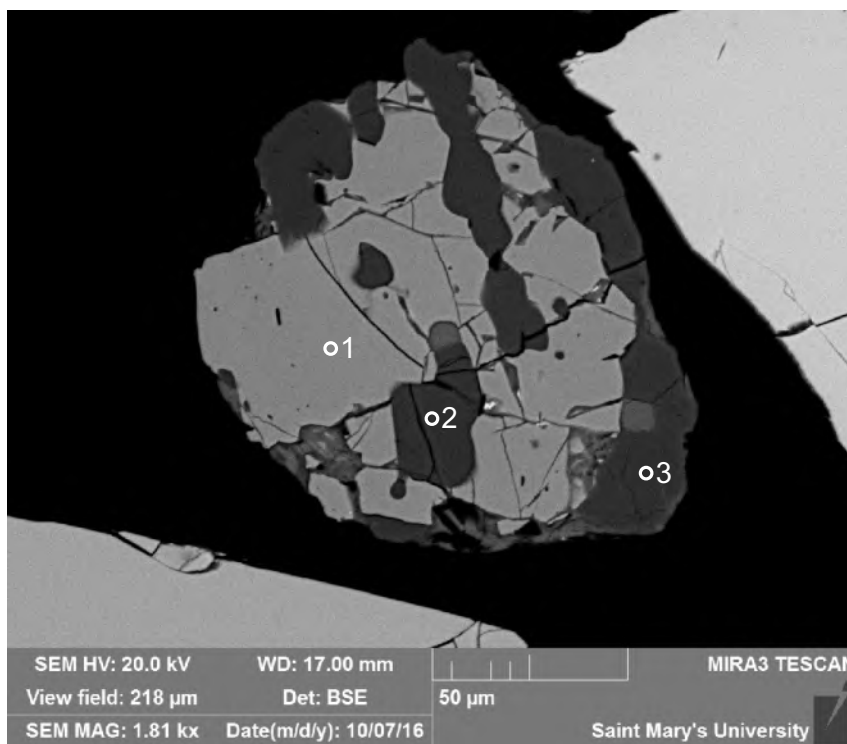

- 1: Garnet
- 2: Quartz
- 3: Quartz

Figure B7.34: Sample S12 site 12.2 (SEM). Lithic clast consisting of garnet + quartz. Metamorphic.

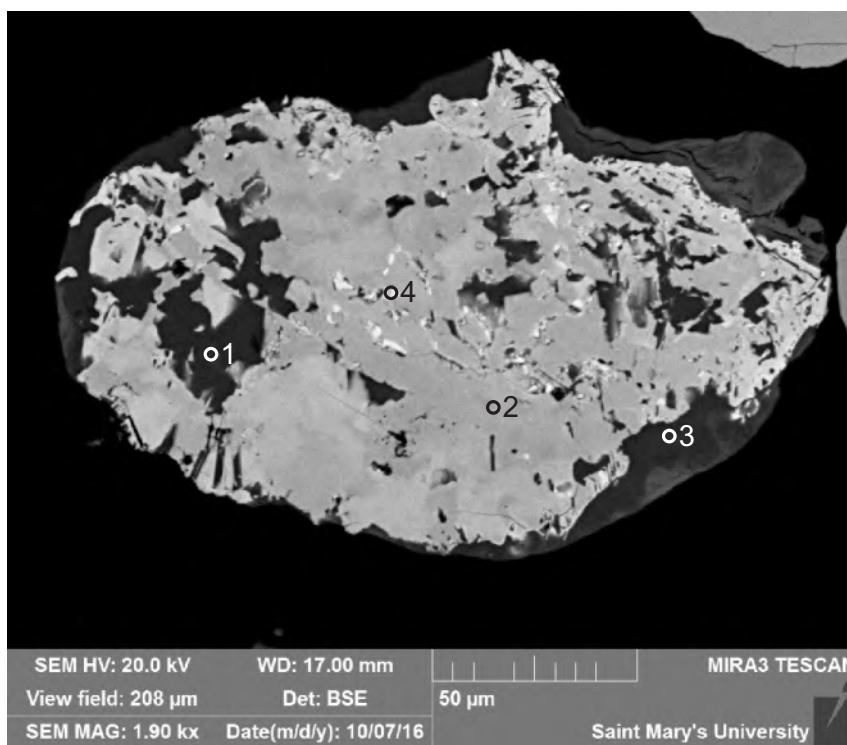

- 1: Cr-Chlorite
- 2: Spinel
- 3: Cr-Chlorite
- 4: Spinel

Figure B7.35: Sample S12 site 12.3 (SEM). Lithic clast consisting of spinel + Cr-chlorite. Metaophiolite.



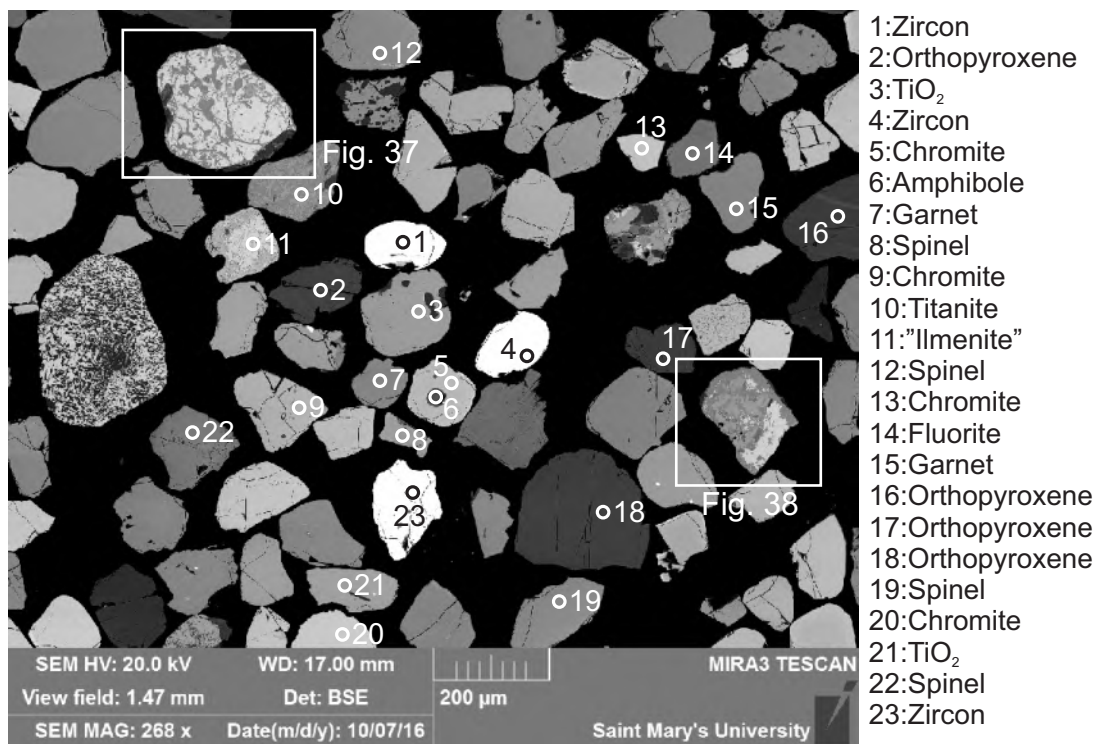

Figure B7.36: Sample S12 site 13 (SEM).

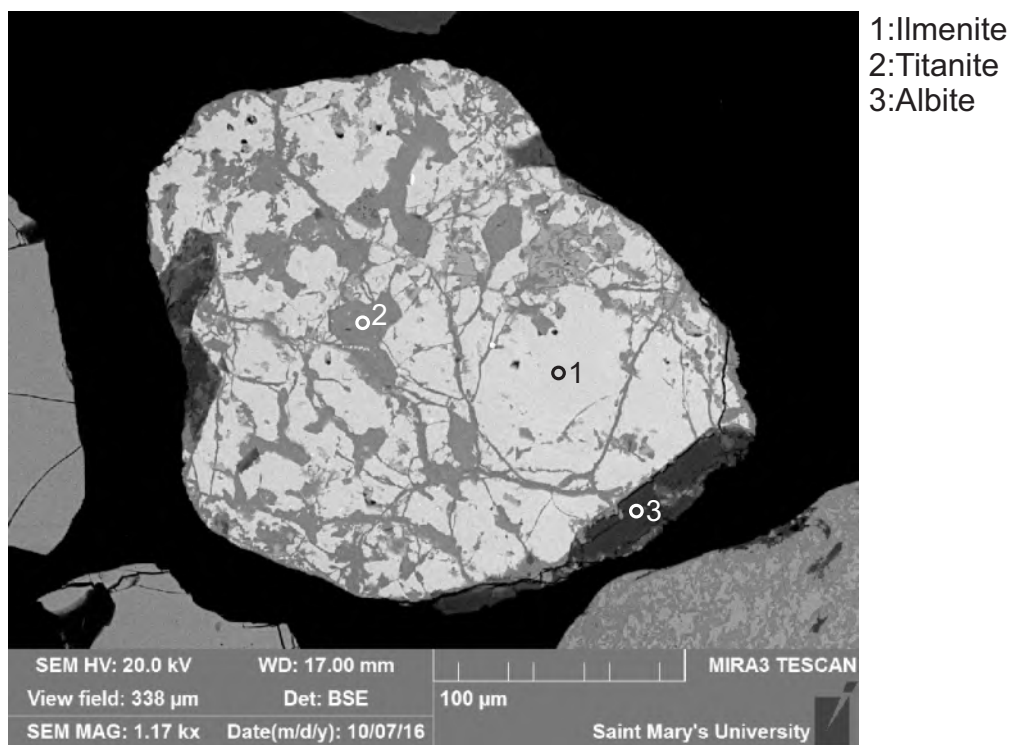

Figure B7.37: Sample S12 site 13.2 (SEM). Lithic clast consisting of albite + titanite + ilmenite. Metamorphic.



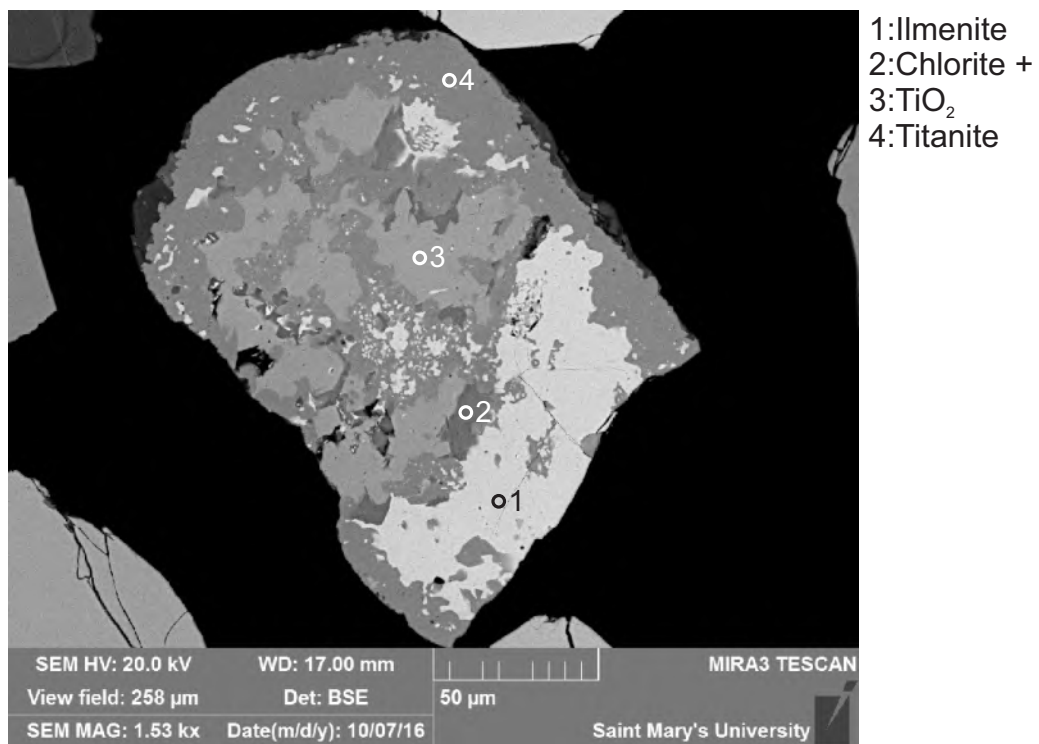

Figure B7.38: Sample S12 site 13.3 (SEM). Lithic clast consisting of titanite + titania + ilmenite + chlorite. Metamorphic.

Table B7.1: EDS analyses of sample S12.

| Sample | Site | Position | Mineral | SiO2  | TiO2  | Al2O3 | FeO   | MnO  | MgO   | CaO   | Na2O | K2O  | P2O5 | SO3 | F     | V2O5 | Cr2O3 | NiO | ZnO  | SrO | ZrO2  | Nb2O5 | HfO2 | WO3 | Total | Actual Total | Calculated Wt% Total |
|--------|------|----------|---------|-------|-------|-------|-------|------|-------|-------|------|------|------|-----|-------|------|-------|-----|------|-----|-------|-------|------|-----|-------|--------------|----------------------|
| S12    | 1    | 1        | Opx     | 56.25 |       | 3.58  | 5.30  |      | 32.85 | 1.39  |      |      |      |     |       |      | 0.63  |     |      |     |       |       |      |     | 100   | 119          |                      |
| S12    | 1    | 2        | Fl      |       |       |       |       |      | 0.92  | 55.88 |      |      |      |     | 43.21 |      |       |     |      |     |       |       |      |     | 100   | 102          |                      |
| S12    | 1    | 3        | Chr     |       |       | 8.23  | 24.56 |      | 8.02  |       |      |      |      |     |       | 0.41 | 58.78 |     |      |     |       |       |      |     | 100   | 106          |                      |
| S12    | 1    | 4        | Chr     |       |       | 25.00 | 20.48 |      | 12.44 |       |      |      |      |     |       | 0.39 | 41.68 |     |      |     |       |       |      |     | 100   | 106          |                      |
| S12    | 1    | 5        | Chr     |       |       | 5.24  | 21.48 |      | 8.69  |       |      |      |      |     |       |      | 64.59 |     |      |     |       |       |      |     | 100   | 104          |                      |
| S12    | 1    | 6        | Chr     |       |       | 16.13 | 20.50 |      | 10.93 |       |      |      |      |     |       |      | 52.44 |     |      |     |       |       |      |     | 100   | 104          |                      |
| S12    | 1    | 7        | Chr     |       |       | 11.82 | 20.02 |      | 10.05 |       |      |      |      |     |       |      | 58.12 |     |      |     |       |       |      |     | 100   | 102          |                      |
| S12    | 1    | 8        | Chl     | 33.52 |       | 18.11 | 27.60 | 1.00 | 3.51  | 1.26  |      |      |      |     |       |      |       |     |      |     |       |       |      |     | 85    | 111          |                      |
| S12    | 1    | 9        | Chr     |       |       | 9.27  | 19.87 |      | 12.48 |       |      |      |      |     |       | 0.39 | 57.99 |     |      |     |       |       |      |     | 100   | 106          |                      |
| S12    | 1    | 10       | Chr     |       |       | 14.12 | 19.78 |      | 11.53 |       |      |      |      |     |       | 0.46 | 54.12 |     |      |     |       |       |      |     | 100   | 109          |                      |
| S12    | 1    | 11       | Grt     | 41.28 |       | 21.83 | 21.27 | 0.35 | 8.08  | 7.19  |      |      |      |     |       |      |       |     |      |     |       |       |      |     | 100   | 114          |                      |
| S12    | 1    | 12       | Grt     | 38.39 |       | 19.95 | 28.67 | 0.59 | 2.57  | 9.83  |      |      |      |     |       |      |       |     |      |     |       |       |      |     | 100   | 92           |                      |
| S12    | 1    | 13       | TiO2    |       | 99.62 |       | 0.38  |      |       |       |      |      |      |     |       |      |       |     |      |     |       |       |      |     | 100   | 111          |                      |
| S12    | 1    | 14       | Grt     | 40.21 |       | 21.04 | 28.01 | 0.98 | 2.94  | 6.82  |      |      |      |     |       |      |       |     |      |     |       |       |      |     | 100   | 118          |                      |
| S12    | 1    | 15       | Grt     | 39.43 |       | 21.29 | 30.44 | 2.65 | 4.68  | 1.51  |      |      |      |     |       |      |       |     |      |     |       |       |      |     | 100   | 118          |                      |
| S12    | 1    | 16       | Spl     |       |       | 44.90 | 15.80 |      | 17.38 |       |      |      |      |     |       |      | 21.91 |     |      |     |       |       |      |     | 100   | 116          |                      |
| S12    | 1    | 17       | Chr     |       |       | 8.57  | 22.56 |      | 8.35  |       |      |      |      |     |       |      | 60.52 |     |      |     |       |       |      |     | 100   | 110          |                      |
| S12    | 1    | 18       | Chr     |       |       | 8.48  | 19.97 |      | 9.45  |       |      |      |      |     |       |      | 62.10 |     |      |     |       |       |      |     | 100   | 103          |                      |
| S12    | 1    | 19       | Opx     | 55.83 |       | 3.67  | 5.35  |      | 32.84 | 1.47  |      |      |      |     |       |      | 0.84  |     |      |     |       |       |      |     | 100   | 113          |                      |
| S12    | 1    | 20       | Grt     | 40.17 |       | 21.29 | 28.74 | 0.78 | 4.66  | 4.37  |      |      |      |     |       |      |       |     |      |     |       |       |      |     | 100   | 110          |                      |
| S12    | 1    | 21       | Chr     |       |       | 7.83  | 25.04 |      | 8.18  |       |      |      |      |     |       |      | 58.95 |     |      |     |       |       |      |     | 100   | 105          |                      |
| S12    | 1    | 22       | Grt     | 39.80 |       | 21.28 | 31.30 | 1.43 | 4.91  | 1.28  |      |      |      |     |       |      |       |     |      |     |       |       |      |     | 100   | 114          |                      |
| S12    | 1    | 23       | Chr     |       | 0.43  | 15.44 | 19.41 |      | 13.16 |       |      |      |      |     |       |      | 51.57 |     |      |     |       |       |      |     | 100   | 111          |                      |
| S12    | 1    | 24       | Zrn     | 31.32 |       |       |       |      |       |       |      |      |      |     |       |      |       |     |      |     | 68.68 |       |      |     | 100   | 127          |                      |
| S12    | 1.2  | 1        | "Mag" + | 3.19  |       |       | 95.92 |      | 0.89  |       |      |      |      |     |       |      |       |     |      |     |       |       |      |     | 100   | 77           | 61                   |
| S12    | 1.2  | 2        | Olig +  | 57.28 |       | 22.30 | 7.92  |      | 0.35  | 5.60  | 6.33 | 0.22 |      |     |       |      |       |     |      |     |       |       |      |     | 100   | 102          |                      |
| S12    | 1.2  | 3        | "Mag" + | 3.44  |       |       | 95.58 |      | 0.97  |       |      |      |      |     |       |      |       |     |      |     |       |       |      |     | 100   | 77           | 62                   |
| S12    | 1.3  | 1        | TiO2 +  | 13.63 | 80.32 | 4.17  | 0.50  |      | 0.37  |       |      | 1.01 |      |     |       |      |       |     |      |     |       |       |      |     | 100   | 111          |                      |
| S12    | 1.3  | 2        | Qz +    | 85.98 | 3.35  | 7.64  | 0.30  |      | 0.34  |       |      | 2.39 |      |     |       |      |       |     |      |     |       |       |      |     | 100   | 119          |                      |
| S12    | 1.3  | 3        | Qz +    | 90.42 | 8.57  | 0.70  |       |      |       |       |      |      |      |     |       |      | 0.31  |     |      |     |       |       |      |     | 100   | 119          |                      |
| S12    | 1.3  | 4        | TiO2 +  | 4.07  | 94.87 | 1.07  |       |      |       |       |      |      |      |     |       |      |       |     |      |     |       |       |      |     | 100   | 108          |                      |
| S12    | 2    | 1        | Fl      |       |       |       |       |      |       | 55.26 | 0.61 |      |      |     | 44.13 |      |       |     |      |     |       |       |      |     | 100   | 100          |                      |
| S12    | 2    | 2        | St      | 29.36 | 0.35  | 52.90 | 13.27 |      | 1.60  |       |      |      |      |     |       |      |       |     | 0.52 |     |       |       |      |     | 98    | 105          |                      |
| S12    | 2    | 3        | TiO2    |       | 99.59 |       | 0.41  |      |       |       |      |      |      |     |       |      |       |     |      |     |       |       |      |     | 100   | 101          |                      |
| S12    | 2    | 4        | ?Grt    | 46.47 |       | 18.93 | 25.40 | 1.25 | 2.82  | 5.13  |      |      |      |     |       |      |       |     |      |     |       |       |      |     | 100   | 109          |                      |
| S12    | 2    | 5        | Chr     |       |       | 23.86 | 19.38 |      | 12.64 |       |      |      |      |     |       |      | 44.12 |     |      |     |       |       |      |     | 100   | 105          |                      |
| S12    | 2    | 6        | Spl     |       |       | 30.71 | 16.16 |      | 14.43 |       |      |      |      |     |       | 0.42 | 38.28 |     |      |     |       |       |      |     | 100   | 107          |                      |
| S12    | 2    | 7        | Ttn +   | 16.54 | 55.23 | 0.84  | 8.67  | 0.94 |       | 16.80 |      |      |      |     |       |      |       |     |      |     |       |       | 0.98 |     | 100   | 102          |                      |
| S12    | 2    | 8        | Grt     | 36.77 |       | 19.55 | 30.74 | 0.82 | 1.65  | 7.06  |      |      | 3.41 |     |       |      |       |     |      |     |       |       |      |     | 100   | 113          |                      |
| S12    | 2    | 9        | Chr     |       |       | 10.69 | 18.60 |      | 12.38 |       |      |      |      |     |       |      | 58.33 |     |      |     |       |       |      |     | 100   | 106          |                      |
| S12    | 2    | 10       | Spl     |       | 0.40  | 25.62 | 22.93 |      | 13.34 |       |      |      |      |     |       |      | 37.70 |     |      |     |       |       |      |     | 100   | 106          |                      |
| S12    | 2    | 11       | Chr     |       |       | 24.80 | 15.33 |      | 17.32 |       |      |      |      |     |       |      | 42.54 |     |      |     |       |       |      |     | 100   | 107          |                      |
| S12    | 2    | 12       | Grt     | 39.80 |       | 20.43 | 27.78 | 7.02 | 3.60  | 1.38  |      |      |      |     |       |      |       |     |      |     |       |       |      |     | 100   | 109          |                      |
| S12    | 2    | 13       | Chr     |       |       | 10.76 | 24.82 |      | 7.88  |       |      |      |      |     |       |      | 56.54 |     |      |     |       |       |      |     | 100   | 101          |                      |
| S12    | 2    | 14       | Zrn     | 31.26 |       |       |       |      |       |       |      |      |      |     |       |      |       |     |      |     | 68.74 |       |      |     | 100   | 122          |                      |
| S12    | 2    | 15       | Chr     |       |       | 10.65 | 26.04 |      | 7.25  |       |      |      |      |     |       | 0.49 | 55.57 |     |      |     |       |       |      |     | 100   | 109          |                      |

Table B7.1: EDS analyses of sample S12.

| Sample | Site | Position | Mineral | SiO2   | TiO2  | Al2O3 | FeO   | MnO   | MgO   | CaO   | Na2O  | K2O  | P2O5 | SO3 | F    | V2O5 | Cr2O3 | NiO | ZnO | SrO | ZrO2  | Nb2O5 | HfO2 | WO3 | Total | Actual Total | Calculated Wt% Total |
|--------|------|----------|---------|--------|-------|-------|-------|-------|-------|-------|-------|------|------|-----|------|------|-------|-----|-----|-----|-------|-------|------|-----|-------|--------------|----------------------|
| S12    | 2    | 16       | Grt     | 39.34  |       | 20.82 | 32.81 | 0.65  | 1.67  | 4.37  |       |      |      |     |      |      | 0.35  |     |     |     |       |       |      |     | 100   | 116          |                      |
| S12    | 2    | 17       | Grt     | 40.01  |       | 21.01 | 23.81 | 4.92  | 3.49  | 6.77  |       |      |      |     |      |      |       |     |     |     |       |       |      |     | 100   | 115          |                      |
| S12    | 2    | 18       | Chr     |        |       | 19.25 | 20.99 |       | 11.97 |       |       |      |      |     |      |      | 47.79 |     |     |     |       |       |      |     | 100   | 109          |                      |
| S12    | 2    | 19       | Chr     |        |       |       | 7.31  | 30.18 | 7.46  |       |       |      |      |     |      |      | 55.05 |     |     |     |       |       |      |     | 100   | 105          |                      |
| S12    | 2    | 20       | Qz +    | 87.16  |       | 6.41  | 2.37  |       | 1.57  |       |       | 2.50 |      |     |      |      |       |     |     |     |       |       |      |     | 100   | 115          |                      |
| S12    | 2    | 21       | Chr     |        |       | 18.74 | 18.23 |       | 12.49 |       |       |      |      |     |      |      | 50.54 |     |     |     |       |       |      |     | 100   | 113          |                      |
| S12    | 2    | 22       | Chr     |        |       | 12.79 | 27.66 |       | 8.53  |       |       |      |      |     |      |      | 51.03 |     |     |     |       |       |      |     | 100   | 110          |                      |
| S12    | 2    | 23       | Chr     |        |       | 8.55  | 26.92 |       | 9.44  |       |       |      |      |     |      |      | 55.09 |     |     |     |       |       |      |     | 100   | 109          |                      |
| S12    | 2    | 24       | TiO2    |        | 99.54 |       | 0.46  |       |       |       |       |      |      |     |      |      |       |     |     |     |       |       |      |     | 100   | 108          |                      |
| S12    | 2    | 25       | Grt     | 40.12  |       | 21.24 | 25.54 | 0.51  | 3.09  | 9.49  |       |      |      |     |      |      |       |     |     |     |       |       |      |     | 100   | 113          |                      |
| S12    | 2.2  | 1        | TiO2    |        | 99.67 |       | 0.33  |       |       |       |       |      |      |     |      |      |       |     |     |     |       |       |      |     | 100   | 107          |                      |
| S12    | 2.2  | 2        | TiO2 +  | 6.68   | 87.02 | 4.32  | 0.62  |       |       |       |       | 1.36 |      |     |      |      |       |     |     |     |       |       |      |     | 100   | 107          |                      |
| S12    | 2.3  | 1        | Qz      | 100.00 |       |       |       |       |       |       |       |      |      |     |      |      |       |     |     |     |       |       |      |     | 100   | 120          |                      |
| S12    | 2.3  | 2        | TiO2 +  | 9.63   | 79.82 | 1.40  | 0.84  |       |       | 8.31  |       |      |      |     |      |      |       |     |     |     |       |       |      |     | 100   | 108          |                      |
| S12    | 2.3  | 3        | Ttn +   | 30.43  | 40.42 | 2.93  | 0.77  |       |       | 24.50 |       |      |      |     | 0.95 |      |       |     |     |     |       |       |      |     | 100   | 111          |                      |
| S12    | 2.3  | 4        | Ms      | 47.28  | 0.47  | 26.92 | 2.34  |       | 2.19  |       | 0.98  | 9.53 |      |     | 4.87 |      | 0.43  |     |     |     |       |       |      |     | 95    | 113          |                      |
| S12    | 2.3  | 5        | Ab      | 69.33  |       | 18.87 |       |       |       |       | 11.80 |      |      |     |      |      |       |     |     |     |       |       |      |     | 100   | 118          |                      |
| S12    | 2.3  | 6        | Zrn     | 31.53  | 0.37  |       |       |       |       |       | 0.38  |      |      |     |      |      | 0.49  |     |     |     | 65.91 |       | 1.32 |     | 100   | 122          |                      |
| S12    | 2.3  | 7        | Ms +    | 53.39  | 0.31  | 23.47 | 4.22  |       | 2.80  |       | 0.82  | 9.98 |      |     |      |      |       |     |     |     |       |       |      |     | 95    | 113          |                      |
| S12    | 3    | 1        | Zrn     | 31.23  |       |       |       |       |       |       |       |      |      |     |      |      |       |     |     |     | 68.77 |       |      |     | 100   | 115          |                      |
| S12    | 3    | 2        | Zrn     | 31.46  |       |       |       |       |       |       |       |      |      |     |      |      |       |     |     |     | 68.54 |       |      |     | 100   | 121          |                      |
| S12    | 3    | 3        | Qz      | 100.00 |       |       |       |       |       |       |       |      |      |     |      |      |       |     |     |     |       |       |      |     | 100   | 111          |                      |
| S12    | 3    | 4        | Opx     | 56.52  |       | 3.44  | 5.42  |       | 33.45 | 0.40  |       |      |      |     |      |      | 0.78  |     |     |     |       |       |      |     | 100   | 120          |                      |
| S12    | 3    | 5        | Opx     | 56.26  |       | 3.54  | 5.48  |       | 33.48 | 0.37  |       |      |      |     |      |      | 0.86  |     |     |     |       |       |      |     | 100   | 115          |                      |
| S12    | 3    | 6        | Chr     |        |       | 14.89 | 17.65 |       | 12.23 |       |       |      |      |     |      |      | 55.22 |     |     |     |       |       |      |     | 100   | 105          |                      |
| S12    | 3    | 7        | Grt     | 40.21  |       | 21.43 | 27.01 | 1.18  | 3.36  | 6.81  |       |      |      |     |      |      |       |     |     |     |       |       |      |     | 100   | 109          |                      |
| S12    | 3    | 8        | Chr     |        |       | 15.14 | 21.32 |       | 10.42 |       |       |      |      |     |      |      | 53.12 |     |     |     |       |       |      |     | 100   | 103          |                      |
| S12    | 3    | 9        | Grt     | 40.10  |       | 20.49 | 24.79 | 4.07  | 1.55  | 9.00  |       |      |      |     |      |      |       |     |     |     |       |       |      |     | 100   | 109          |                      |
| S12    | 3    | 10       | Chr     |        |       | 11.21 | 20.71 |       | 9.27  |       |       |      |      |     |      |      | 58.81 |     |     |     |       |       |      |     | 100   | 104          |                      |
| S12    | 3    | 11       | Grt     | 39.55  |       | 21.49 | 27.84 | 4.35  | 4.92  | 1.86  |       |      |      |     |      |      |       |     |     |     |       |       |      |     | 100   | 109          |                      |
| S12    | 3    | 12       | Spl     |        |       | 49.05 | 13.90 |       | 18.62 |       |       |      |      |     |      |      | 18.43 |     |     |     |       |       |      |     | 100   | 112          |                      |
| S12    | 3    | 13       | Chr     |        |       | 17.86 | 19.64 |       | 10.90 |       |       |      |      |     |      | 0.38 | 51.23 |     |     |     |       |       |      |     | 100   | 109          |                      |
| S12    | 3    | 14       | Ep      | 39.98  |       | 25.65 | 8.89  |       |       | 22.47 |       |      |      |     |      |      |       |     |     |     |       |       |      |     | 97    | 109          |                      |
| S12    | 3    | 15       | Grt     | 39.70  |       | 20.90 | 31.01 | 1.52  | 4.49  | 2.39  |       |      |      |     |      |      |       |     |     |     |       |       |      |     | 100   | 114          |                      |
| S12    | 3    | 16       | Opx     | 56.60  |       | 3.15  | 5.67  |       | 33.52 | 0.37  |       |      |      |     |      |      | 0.70  |     |     |     |       |       |      |     | 100   | 122          |                      |
| S12    | 3    | 17       | Grt     | 39.74  |       | 20.91 | 28.43 | 0.71  | 2.51  | 7.69  |       |      |      |     |      |      |       |     |     |     |       |       |      |     | 100   | 119          |                      |
| S12    | 3    | 18       | Chr     |        | 0.76  | 20.07 | 27.21 |       | 10.38 |       |       |      |      |     |      |      | 41.58 |     |     |     |       |       |      |     | 100   | 114          |                      |
| S12    | 3    | 19       | Chr     |        |       | 16.72 | 19.14 |       | 10.61 |       |       |      |      |     |      | 0.39 | 53.14 |     |     |     |       |       |      |     | 100   | 110          |                      |
| S12    | 3    | 20       | Grt     | 39.79  |       | 21.34 | 32.70 | 0.48  | 5.02  | 0.66  |       |      |      |     |      |      |       |     |     |     |       |       |      |     | 100   | 112          |                      |
| S12    | 3    | 21       | Spl     |        |       | 46.44 | 14.08 |       | 18.25 |       |       |      |      |     |      |      | 21.24 |     |     |     |       |       |      |     | 100   | 112          |                      |
| S12    | 3    | 22       | Chr     |        | 0.40  | 4.60  | 29.74 |       | 5.84  |       |       |      |      |     |      |      | 59.42 |     |     |     |       |       |      |     | 100   | 104          |                      |
| S12    | 3    | 23       | Chr     |        |       | 14.74 | 19.51 |       | 11.62 |       |       |      |      |     |      |      | 54.13 |     |     |     |       |       |      |     | 100   | 108          |                      |
| S12    | 3.2  | 1        | Ab      | 69.48  |       | 18.73 | 0.29  |       |       |       | 11.50 |      |      |     |      |      |       |     |     |     |       |       |      |     | 100   | 120          |                      |
| S12    | 3.2  | 2        | TiO2    | 0.41   | 96.02 |       | 3.57  |       |       |       |       |      |      |     |      |      |       |     |     |     |       |       |      |     | 100   | 110          |                      |
| S12    | 3.2  | 3        | Ilm     |        | 51.93 |       | 46.21 | 1.86  |       |       |       |      |      |     |      |      |       |     |     |     |       |       |      |     | 100   | 108          |                      |
| S12    | 4    | 1        | Zrn     | 31.24  |       |       |       |       |       |       |       |      |      |     |      |      |       |     |     |     | 68.76 |       |      |     | 100   | 117          |                      |

Table B7.1: EDS analyses of sample S12.

| Sample | Site | Position | Mineral | SiO2   | TiO2  | Al2O3 | FeO   | MnO  | MgO   | CaO   | Na2O | K2O   | P2O5 | SO3 | F     | V2O5 | Cr2O3 | NiO | ZnO  | SrO | ZrO2  | Nb2O5 | HfO2 | WO3 | Total | Actual Total | Calculated Wt% Total |
|--------|------|----------|---------|--------|-------|-------|-------|------|-------|-------|------|-------|------|-----|-------|------|-------|-----|------|-----|-------|-------|------|-----|-------|--------------|----------------------|
| S12    | 4    | 2        | Opx     | 56.87  |       | 3.18  | 5.55  |      | 33.56 | 0.34  |      |       |      |     |       |      | 0.50  |     |      |     |       |       |      |     | 100   | 114          |                      |
| S12    | 4    | 3        | Qz      | 99.58  |       |       | 0.42  |      |       |       |      |       |      |     |       |      |       |     |      |     |       |       |      |     | 100   | 120          |                      |
| S12    | 4    | 4        | Grt     | 39.85  |       | 20.98 | 28.91 | 0.81 | 3.78  | 5.67  |      |       |      |     |       |      |       |     |      |     |       |       |      |     | 100   | 114          |                      |
| S12    | 4    | 5        | Chr     |        |       | 12.60 | 23.87 |      | 8.87  |       |      |       |      |     |       |      | 54.65 |     |      |     |       |       |      |     | 100   | 108          |                      |
| S12    | 4    | 6        | Chr     |        |       | 11.11 | 26.85 |      | 8.84  |       |      |       |      |     |       |      | 53.20 |     |      |     |       |       |      |     | 100   | 108          |                      |
| S12    | 4    | 7        | Grt     | 39.38  |       | 20.75 | 34.75 | 1.13 | 2.66  | 1.33  |      |       |      |     |       |      |       |     |      |     |       |       |      |     | 100   | 113          |                      |
| S12    | 4    | 8        | Chr     |        |       | 11.76 | 23.70 |      | 9.27  |       |      |       |      |     |       | 0.38 | 54.89 |     |      |     |       |       |      |     | 100   | 108          |                      |
| S12    | 4    | 9        | Chr     |        |       | 14.04 | 21.39 |      | 10.06 |       |      |       |      |     |       | 0.53 | 53.99 |     |      |     |       |       |      |     | 100   | 108          |                      |
| S12    | 4    | 10       | Chr     |        |       | 6.77  | 27.02 |      | 7.02  |       |      |       |      |     |       |      | 59.18 |     |      |     |       |       |      |     | 100   | 112          |                      |
| S12    | 4    | 11       | Spl     |        |       | 32.81 | 17.96 |      | 15.04 |       |      |       |      |     |       |      | 34.18 |     |      |     |       |       |      |     | 100   | 114          |                      |
| S12    | 4    | 12       | Fl      |        |       |       |       |      |       | 52.26 | 0.68 |       |      |     | 47.06 |      |       |     |      |     |       |       |      |     | 100   | 119          |                      |
| S12    | 4    | 13       | Chr     |        |       | 13.12 | 23.91 |      | 9.42  |       |      |       |      |     |       |      | 53.56 |     |      |     |       |       |      |     | 100   | 105          |                      |
| S12    | 4    | 14       | Spl     |        |       | 28.38 | 22.50 |      | 12.59 |       |      |       |      |     |       |      | 36.53 |     |      |     |       |       |      |     | 100   | 109          |                      |
| S12    | 4    | 15       | Chr     | 0.83   | 0.36  | 15.81 | 35.03 |      | 7.49  |       |      |       |      |     |       |      | 40.48 |     |      |     |       |       |      |     | 100   | 103          |                      |
| S12    | 4    | 16       | Chr     |        | 0.55  | 15.10 | 30.27 |      | 7.90  |       |      |       |      |     |       | 0.42 | 45.75 |     |      |     |       |       |      |     | 100   | 106          |                      |
| S12    | 4    | 17       | Spl     |        |       | 31.69 | 16.30 |      | 14.94 |       |      |       |      |     |       |      | 37.07 |     |      |     |       |       |      |     | 100   | 110          |                      |
| S12    | 4    | 18       | Spl     |        | 0.54  | 36.28 | 17.40 |      | 16.06 |       |      |       |      |     |       |      | 29.72 |     |      |     |       |       |      |     | 100   | 107          |                      |
| S12    | 4    | 19       | Spl     |        | 0.33  | 25.88 | 23.25 |      | 12.49 |       |      |       |      |     |       |      | 38.06 |     |      |     |       |       |      |     | 100   | 105          |                      |
| S12    | 4    | 20       | Spl     |        |       | 42.91 | 15.49 |      | 16.43 |       |      |       |      |     |       |      | 25.17 |     |      |     |       |       |      |     | 100   | 108          |                      |
| S12    | 4    | 21       | Qz      | 100.00 |       |       |       |      |       |       |      |       |      |     |       |      |       |     |      |     |       |       |      |     | 100   | 124          |                      |
| S12    | 4    | 22       | Spl     |        | 0.76  | 27.31 | 26.36 |      | 12.19 |       |      |       |      |     |       |      | 33.38 |     |      |     |       |       |      |     | 100   | 118          |                      |
| S12    | 4.2  | 1        | Ilm     |        | 50.68 |       | 46.00 | 3.32 |       |       |      |       |      |     |       |      |       |     |      |     |       |       |      |     | 100   | 106          |                      |
| S12    | 4.2  | 2        | Ttn     | 33.10  | 36.36 | 2.29  | 1.15  |      |       | 27.10 |      |       |      |     |       |      |       |     |      |     |       |       |      |     | 100   | 111          |                      |
| S12    | 4.2  | 3        | TiO2 +  | 2.64   | 91.01 | 1.33  | 2.76  |      |       | 2.27  |      |       |      |     |       |      |       |     |      |     |       |       |      |     | 100   | 105          |                      |
| S12    | 4.3  | 1        | Ms +    | 61.00  | 0.55  | 16.50 | 1.45  |      | 3.12  | 0.37  | 0.59 | 7.04  |      |     | 4.38  |      |       |     |      |     |       |       |      |     | 95    | 115          |                      |
| S12    | 4.3  | 2        | Ttn     | 32.91  | 37.97 | 1.28  |       |      |       | 27.84 |      |       |      |     |       |      |       |     |      |     |       |       |      |     | 100   | 112          |                      |
| S12    | 4.3  | 3        | Ms      | 55.17  | 0.51  | 25.31 | 2.96  |      | 4.44  |       | 0.34 | 10.93 |      |     |       |      | 0.33  |     |      |     |       |       |      |     | 100   | 102          |                      |
| S12    | 5    | 1        | Fl      |        |       |       |       |      |       | 57.97 | 0.65 |       |      |     | 41.38 |      |       |     |      |     |       |       |      |     | 100   | 88           |                      |
| S12    | 5    | 2        | Zrn     | 31.06  |       |       |       |      |       |       |      |       |      |     |       |      |       |     |      |     | 68.94 |       |      |     | 100   | 117          |                      |
| S12    | 5    | 3        | Qz      | 100.00 |       |       |       |      |       |       |      |       |      |     |       |      |       |     |      |     |       |       |      |     | 100   | 120          |                      |
| S12    | 5    | 4        | Chr     | 1.62   |       | 2.31  | 26.34 |      | 2.71  |       | 0.45 |       |      |     |       |      | 66.58 |     |      |     |       |       |      |     | 100   | 85           |                      |
| S12    | 5    | 5        | Chr     |        |       | 10.61 | 21.89 |      | 9.31  |       |      |       |      |     |       |      | 58.19 |     |      |     |       |       |      |     | 100   | 104          |                      |
| S12    | 5    | 6        | Grt     | 40.23  |       | 21.08 | 28.52 | 0.83 | 4.05  | 5.29  |      |       |      |     |       |      |       |     |      |     |       |       |      |     | 100   | 111          |                      |
| S12    | 5    | 7        | Spl     |        |       | 52.87 | 11.09 |      | 20.40 |       |      |       |      |     |       |      | 15.65 |     |      |     |       |       |      |     | 100   | 109          |                      |
| S12    | 5    | 8        | Fl      |        |       |       |       |      |       | 55.41 | 0.91 |       |      |     | 42.55 |      |       |     | 1.13 |     |       |       |      |     | 100   | 99           |                      |
| S12    | 5    | 9        | Chr     |        |       | 9.48  | 25.00 |      | 8.40  |       |      |       |      |     |       |      | 57.12 |     |      |     |       |       |      |     | 100   | 103          |                      |
| S12    | 5    | 10       | Spl     |        |       | 38.81 | 16.23 |      | 16.03 |       |      |       |      |     |       | 0.36 | 28.57 |     |      |     |       |       |      |     | 100   | 107          |                      |
| S12    | 5    | 11       | Grt     | 38.98  |       | 20.64 | 35.31 | 2.71 | 1.57  | 0.78  |      |       |      |     |       |      |       |     |      |     |       |       |      |     | 100   | 111          |                      |
| S12    | 5    | 12       | Chr     |        |       | 7.24  | 23.20 |      | 8.01  |       |      |       |      |     |       |      | 61.56 |     |      |     |       |       |      |     | 100   | 105          |                      |
| S12    | 5    | 13       | Grt     | 39.42  |       | 21.24 | 29.53 | 0.75 | 1.91  | 7.15  |      |       |      |     |       |      |       |     |      |     |       |       |      |     | 100   | 113          |                      |
| S12    | 5    | 14       | Fl      |        |       |       |       |      |       | 55.01 | 0.95 |       |      |     | 44.04 |      |       |     |      |     |       |       |      |     | 100   | 105          |                      |
| S12    | 5    | 15       | Spl     |        |       | 40.53 | 15.69 |      | 16.95 |       |      |       |      |     |       |      | 26.83 |     |      |     |       |       |      |     | 100   | 112          |                      |
| S12    | 5    | 16       | Grt     | 39.32  |       | 21.21 | 32.92 | 0.34 | 2.28  | 3.93  |      |       |      |     |       |      |       |     |      |     |       |       |      |     | 100   | 114          |                      |
| S12    | 5    | 17       | Chr     |        | 0.33  | 22.80 | 26.61 |      | 10.50 |       |      |       |      |     |       | 0.40 | 39.36 |     |      |     |       |       |      |     | 100   | 111          |                      |
| S12    | 5    | 18       | Chr     |        |       | 5.95  | 24.28 |      | 8.47  |       |      |       |      |     |       |      | 61.29 |     |      |     |       |       |      |     | 100   | 111          |                      |
| S12    | 5    | 19       | Zrn     | 31.44  |       |       |       |      |       |       |      |       |      |     |       |      |       |     |      |     | 68.56 |       |      |     | 100   | 122          |                      |



Table B7.1: EDS analyses of sample S12.

| Sample | Site | Position | Mineral | SiO2  | TiO2  | Al2O3 | FeO   | MnO   | MgO   | CaO   | Na2O  | K2O  | P2O5 | SO3 | F     | V2O5 | Cr2O3 | NiO | ZnO | SrO | ZrO2  | Nb2O5 | HfO2 | WO3 | Total | Actual Total | Calculated Wt% Total |
|--------|------|----------|---------|-------|-------|-------|-------|-------|-------|-------|-------|------|------|-----|-------|------|-------|-----|-----|-----|-------|-------|------|-----|-------|--------------|----------------------|
| S12    | 5    | 20       | Chr +   |       | 1.84  | 15.54 | 32.43 |       | 8.44  |       |       |      |      |     |       | 0.46 | 41.29 |     |     |     |       |       |      |     | 100   | 113          |                      |
| S12    | 5    | 21       | Chr     |       |       | 4.69  | 23.35 |       | 7.51  |       |       |      |      |     |       |      | 64.45 |     |     |     |       |       |      |     | 100   | 112          |                      |
| S12    | 5    | 22       | Grt     | 39.40 |       | 20.98 | 31.54 | 1.17  | 1.98  | 4.93  |       |      |      |     |       |      |       |     |     |     |       |       |      |     | 100   | 116          |                      |
| S12    | 5    | 23       | Grt     | 39.95 |       | 21.35 | 30.49 |       | 5.77  | 2.44  |       |      |      |     |       |      |       |     |     |     |       |       |      |     | 100   | 112          |                      |
| S12    | 5    | 24       | Spl     |       |       | 28.71 | 20.63 |       | 13.17 |       |       |      |      |     |       | 0.37 | 37.11 |     |     |     |       |       |      |     | 100   | 106          |                      |
| S12    | 5    | 25       | Grt     | 40.03 |       | 21.01 | 25.99 | 1.18  | 3.47  | 8.31  |       |      |      |     |       |      |       |     |     |     |       |       |      |     | 100   | 116          |                      |
| S12    | 5    | 26       | Chr     |       |       | 13.36 | 27.35 |       | 8.60  |       |       |      |      |     |       |      | 50.69 |     |     |     |       |       |      |     | 100   | 107          |                      |
| S12    | 5    | 27       | Grt     | 37.46 |       | 20.95 | 16.02 | 24.66 |       | 0.32  |       |      | 0.59 |     |       |      |       |     |     |     |       |       |      |     | 100   | 118          |                      |
| S12    | 5    | 28       | Fl      |       |       |       |       |       |       | 55.84 |       |      |      |     | 44.16 |      |       |     |     |     |       |       |      |     | 100   | 112          |                      |
| S12    | 5    | 29       | Chr     |       |       | 9.19  | 23.94 |       | 8.18  |       |       |      |      |     |       |      | 58.69 |     |     |     |       |       |      |     | 100   | 114          |                      |
| S12    | 5    | 30       | Chr     |       |       | 20.52 | 18.83 |       | 12.34 |       |       |      |      |     |       | 0.51 | 47.80 |     |     |     |       |       |      |     | 100   | 117          |                      |
| S12    | 5    | 31       | Chr     |       |       | 12.82 | 24.61 |       | 10.20 |       |       |      |      |     |       |      | 52.37 |     |     |     |       |       |      |     | 100   | 107          |                      |
| S12    | 5    | 32       | Spl     |       |       | 36.99 | 15.70 |       | 16.32 |       |       |      |      |     |       |      | 30.99 |     |     |     |       |       |      |     | 100   | 111          |                      |
| S12    | 5    | 33       | Grt     | 39.97 |       | 21.28 | 25.05 | 0.95  | 1.82  | 10.92 |       |      |      |     |       |      |       |     |     |     |       |       |      |     | 100   | 110          |                      |
| S12    | 5.2  | 1        | Ep      | 40.10 |       | 23.49 | 10.64 |       | 0.77  | 22.00 |       |      |      |     |       |      |       |     |     |     |       |       |      |     | 97    | 110          |                      |
| S12    | 5.2  | 2        | Qz +    | 95.57 |       | 1.47  | 1.46  |       | 1.34  |       |       | 0.16 |      |     |       |      |       |     |     |     |       |       |      |     | 100   | 123          |                      |
| S12    | 5.2  | 3        | Chl     | 31.15 |       | 17.26 | 15.19 |       | 20.75 | 0.33  | 0.31  |      |      |     |       |      |       |     |     |     |       |       |      |     | 85    | 98           |                      |
| S12    | 5.3  | 1        | Chr     |       |       | 5.43  | 33.80 |       | 4.21  |       |       |      |      |     |       | 0.72 | 55.84 |     |     |     |       |       |      |     | 100   | 107          |                      |
| S12    | 5.3  | 2        | Chr     |       |       | 24.10 | 19.39 |       | 11.95 |       |       |      |      |     |       | 0.43 | 44.12 |     |     |     |       |       |      |     | 100   | 110          |                      |
| S12    | 5.3  | 3        | Chr     |       |       | 9.43  | 42.71 | 0.90  | 3.60  |       |       |      |      |     |       | 0.42 | 42.93 |     |     |     |       |       |      |     | 100   | 106          |                      |
| S12    | 5.3  | 4        | Chr     |       |       | 16.54 | 25.30 |       | 8.46  |       |       |      |      |     |       |      | 49.69 |     |     |     |       |       |      |     | 100   | 109          |                      |
| S12    | 6    | 1        | Zrn     | 31.10 |       |       |       |       |       |       |       |      |      |     |       |      |       |     |     |     | 68.90 |       |      |     | 100   | 116          |                      |
| S12    | 6    | 2        | Cpx     | 54.24 |       | 3.42  | 1.98  |       | 16.87 | 22.62 |       |      |      |     |       |      | 0.86  |     |     |     |       |       |      |     | 100   | 112          |                      |
| S12    | 6    | 3        | Grt     | 41.45 |       | 22.17 | 22.93 | 0.45  | 12.36 | 0.64  |       |      |      |     |       |      |       |     |     |     |       |       |      |     | 100   | 110          |                      |
| S12    | 6    | 4        | Zrn +   | 24.48 |       |       |       |       |       | 13.04 |       |      |      |     | 2.51  |      |       |     |     |     | 59.97 |       |      |     | 100   | 113          |                      |
| S12    | 6    | 5        | Zrn     | 31.27 |       |       |       |       |       |       |       |      |      |     |       |      |       |     |     |     | 68.73 |       |      |     | 100   | 123          |                      |
| S12    | 6    | 6        | Grt     | 39.67 |       | 21.13 | 30.87 | 2.42  | 2.10  | 3.80  |       |      |      |     |       |      |       |     |     |     |       |       |      |     | 100   | 114          |                      |
| S12    | 6    | 7        | Opx     | 56.20 |       | 3.13  | 5.28  |       | 33.30 | 1.29  |       |      |      |     |       |      | 0.80  |     |     |     |       |       |      |     | 100   | 117          |                      |
| S12    | 6    | 8        | Chr     |       |       | 10.65 | 19.62 |       | 10.38 |       |       |      |      |     |       | 0.52 | 58.84 |     |     |     |       |       |      |     | 100   | 106          |                      |
| S12    | 6    | 9        | Fl      |       |       |       |       |       |       | 50.95 | 0.76  |      |      |     | 48.29 |      |       |     |     |     |       |       |      |     | 100   | 116          |                      |
| S12    | 6    | 10       | Grt     | 39.90 |       | 20.67 | 25.17 | 5.57  | 4.74  | 3.96  |       |      |      |     |       |      |       |     |     |     |       |       |      |     | 100   | 109          |                      |
| S12    | 6    | 11       | Chr     |       |       | 8.21  | 32.97 |       | 7.29  |       |       |      |      |     |       |      | 51.53 |     |     |     |       |       |      |     | 100   | 101          |                      |
| S12    | 6    | 12       | Ilm     |       | 50.84 |       | 47.44 | 1.72  |       |       |       |      |      |     |       |      |       |     |     |     |       |       |      |     | 100   | 100          |                      |
| S12    | 6    | 13       | Spl     |       |       | 27.69 | 20.71 |       | 13.88 |       |       |      |      |     |       |      | 37.72 |     |     |     |       |       |      |     | 100   | 105          |                      |
| S12    | 6    | 14       | Spl     |       |       | 29.21 | 17.26 |       | 13.71 |       |       |      |      |     |       |      | 39.81 |     |     |     |       |       |      |     | 100   | 104          |                      |
| S12    | 6    | 15       | Grt     | 39.87 |       | 21.18 | 32.54 | 0.96  | 5.16  | 0.29  |       |      |      |     |       |      |       |     |     |     |       |       |      |     | 100   | 107          |                      |
| S12    | 6    | 16       | Spl     |       | 0.32  | 30.47 | 19.41 |       | 14.99 |       |       |      |      |     |       |      | 34.80 |     |     |     |       |       |      |     | 100   | 108          |                      |
| S12    | 6    | 17       | Grt     | 39.63 |       | 20.71 | 20.49 | 13.52 | 0.75  | 4.91  |       |      |      |     |       |      |       |     |     |     |       |       |      |     | 100   | 115          |                      |
| S12    | 6    | 18       | Chr     |       |       | 7.93  | 18.48 |       | 10.41 |       |       |      |      |     |       |      | 63.18 |     |     |     |       |       |      |     | 100   | 110          |                      |
| S12    | 6    | 19       | Grt     | 39.82 |       | 21.08 | 26.54 | 0.97  | 2.07  | 9.52  |       |      |      |     |       |      |       |     |     |     |       |       |      |     | 100   | 116          |                      |
| S12    | 6    | 20       | Ab      | 66.59 |       | 18.65 | 0.75  | 1.20  |       | 1.43  | 11.37 |      |      |     |       |      |       |     |     |     |       |       |      |     | 100   | 125          |                      |
| S12    | 6    | 21       | Spl     |       |       | 26.79 | 16.02 |       | 14.73 |       |       |      |      |     |       |      | 42.46 |     |     |     |       |       |      |     | 100   | 112          |                      |
| S12    | 6    | 22       | Ep      | 40.17 |       | 27.10 | 6.27  |       |       | 23.46 |       |      |      |     |       |      |       |     |     |     |       |       |      |     | 97    | 106          |                      |
| S12    | 6    | 23       | Grt     | 39.87 |       | 21.16 | 28.75 | 1.18  | 3.07  | 5.96  |       |      |      |     |       |      |       |     |     |     |       |       |      |     | 100   | 113          |                      |
| S12    | 6    | 24       | Chr     |       |       | 23.81 | 26.78 |       | 10.48 |       |       |      |      |     |       | 0.65 | 38.29 |     |     |     |       |       |      |     | 100   | 108          |                      |
| S12    | 6    | 25       | Opx     | 58.36 |       | 3.09  | 4.27  |       | 29.61 | 3.03  | 0.51  |      |      |     |       |      | 1.13  |     |     |     |       |       |      |     | 100   | 109          |                      |

Table B7.1: EDS analyses of sample S12.

| Sample | Site | Position | Mineral | SiO2   | TiO2  | Al2O3 | FeO   | MnO  | MgO   | CaO   | Na2O | K2O | P2O5 | SO3 | F     | V2O5 | Cr2O3 | NiO | ZnO | SrO | ZrO2  | Nb2O5 | HfO2 | WO3 | Total | Actual Total | Calculated Wt% Total |
|--------|------|----------|---------|--------|-------|-------|-------|------|-------|-------|------|-----|------|-----|-------|------|-------|-----|-----|-----|-------|-------|------|-----|-------|--------------|----------------------|
| S12    | 6    | 26       | Chr     |        |       | 17.17 | 21.16 |      | 10.65 |       |      |     |      |     |       | 0.44 | 50.58 |     |     |     |       |       |      |     | 100   | 109          |                      |
| S12    | 6    | 27       | Ep      | 40.22  |       | 24.35 | 10.48 |      |       | 21.96 |      |     |      |     |       |      |       |     |     |     |       |       |      |     | 97    | 108          |                      |
| S12    | 6    | 28       | Spl     |        |       | 29.78 | 19.02 |      | 14.11 |       |      |     |      |     |       |      | 37.09 |     |     |     |       |       |      |     | 100   | 112          |                      |
| S12    | 6    | 29       | TiO2    |        | 99.50 |       | 0.50  |      |       |       |      |     |      |     |       |      |       |     |     |     |       |       |      |     | 100   | 113          |                      |
| S12    | 6    | 30       | Grt     | 39.50  |       | 21.27 | 30.70 | 1.22 | 3.02  | 4.29  |      |     |      |     |       |      |       |     |     |     |       |       |      |     | 100   | 117          |                      |
| S12    | 6    | 31       | Spl     |        |       | 49.99 | 13.33 |      | 18.91 |       |      |     |      |     |       |      | 17.77 |     |     |     |       |       |      |     | 100   | 108          |                      |
| S12    | 6.2  | 1        | TiO2 +  | 2.10   | 96.37 | 0.93  | 0.60  |      |       |       |      |     |      |     |       |      |       |     |     |     |       |       |      |     | 100   | 106          |                      |
| S12    | 6.2  | 2        | Qz      | 99.23  | 0.77  |       |       |      |       |       |      |     |      |     |       |      |       |     |     |     |       |       |      |     | 100   | 120          |                      |
| S12    | 6.3  | 1        | Spl     |        |       | 29.28 | 18.82 |      | 14.12 |       |      |     |      |     |       |      | 37.79 |     |     |     |       |       |      |     | 100   | 111          |                      |
| S12    | 6.3  | 2        | "Chr"   |        |       | 12.83 | 45.85 |      | 4.32  |       |      |     |      |     |       |      | 36.99 |     |     |     |       |       |      |     | 100   | 106          |                      |
| S12    | 6.3  | 3        | Spl     |        |       | 28.20 | 21.89 |      | 12.35 |       |      |     |      |     |       |      | 37.56 |     |     |     |       |       |      |     | 100   | 115          |                      |
| S12    | 6.3  | 4        | Chr     |        |       | 11.21 | 33.03 |      | 5.78  |       |      |     |      |     |       |      | 49.98 |     |     |     |       |       |      |     | 100   | 107          |                      |
| S12    | 6.3  | 5        | Cr-Chl  | 32.01  |       | 16.63 | 2.85  |      | 31.61 |       |      |     |      |     |       |      | 1.91  |     |     |     |       |       |      |     | 85    | 97           |                      |
| S12    | 6.3  | 6        | Cr-Chl  | 29.34  |       | 12.38 | 9.11  |      | 22.88 | 0.65  | 0.45 |     |      |     |       |      | 5.58  |     |     |     |       |       | 4.62 |     | 85    | 92           |                      |
| S12    | 6.3  | 7        | Chr     |        |       | 22.01 | 25.00 |      | 9.69  |       |      |     |      |     |       |      | 43.29 |     |     |     |       |       |      |     | 100   | 109          |                      |
| S12    | 6.3  | 8        | Spl     |        |       | 7.85  | 52.05 |      | 2.19  |       |      |     |      |     |       |      | 37.91 |     |     |     |       |       |      |     | 100   | 103          |                      |
| S12    | 7    | 1        | Zrn     | 30.99  |       |       |       |      |       |       |      |     |      |     |       |      |       |     |     |     | 67.65 |       | 1.36 |     | 100   | 125          |                      |
| S12    | 7    | 2        | Zrn     | 30.72  |       |       |       |      |       |       |      |     |      |     |       |      |       |     |     |     | 67.89 |       | 1.39 |     | 100   | 125          |                      |
| S12    | 7    | 3        | Zrn     | 30.75  |       |       |       |      |       |       |      |     |      |     |       |      |       |     |     |     | 69.25 |       |      |     | 100   | 121          |                      |
| S12    | 7    | 4        | Ilm     |        | 40.90 |       | 54.89 | 0.52 | 3.70  |       |      |     |      |     |       |      |       |     |     |     |       |       |      |     | 100   | 104          |                      |
| S12    | 7    | 5        | Grt     | 39.67  |       | 20.87 | 24.44 | 7.20 | 1.59  | 6.23  |      |     |      |     |       |      |       |     |     |     |       |       |      |     | 100   | 117          |                      |
| S12    | 7    | 6        | Qz      | 100.00 |       |       |       |      |       |       |      |     |      |     |       |      |       |     |     |     |       |       |      |     | 100   | 124          |                      |
| S12    | 7    | 7        | Chr     |        |       | 9.36  | 22.41 |      | 8.16  |       |      |     |      |     |       | 0.41 | 59.65 |     |     |     |       |       |      |     | 100   | 113          |                      |
| S12    | 7    | 8        | TiO2 +  |        | 94.89 |       | 1.89  |      |       |       |      |     |      |     |       |      |       |     |     |     |       | 3.21  |      |     | 100   | 111          |                      |
| S12    | 7    | 9        | Qz      | 100.00 |       |       |       |      |       |       |      |     |      |     |       |      |       |     |     |     |       |       |      |     | 100   | 122          |                      |
| S12    | 7    | 10       | Chr     |        |       | 9.99  | 29.29 |      | 7.73  |       |      |     |      |     |       |      | 53.00 |     |     |     |       |       |      |     | 100   | 108          |                      |
| S12    | 7    | 11       | Opx     | 56.28  |       | 3.25  | 5.67  |      | 33.66 | 0.44  |      |     |      |     |       |      | 0.70  |     |     |     |       |       |      |     | 100   | 118          |                      |
| S12    | 7    | 12       | Chr     |        |       | 4.96  | 22.44 |      | 8.14  |       |      |     |      |     |       |      | 64.46 |     |     |     |       |       |      |     | 100   | 107          |                      |
| S12    | 7    | 13       | Grt     | 39.56  |       | 21.09 | 30.87 | 2.69 | 4.71  | 1.08  |      |     |      |     |       |      |       |     |     |     |       |       |      |     | 100   | 113          |                      |
| S12    | 7    | 14       | Grt     | 39.09  |       | 21.11 | 33.83 | 1.02 | 2.58  | 2.38  |      |     |      |     |       |      |       |     |     |     |       |       |      |     | 100   | 114          |                      |
| S12    | 7    | 15       | Spl     |        |       | 36.97 | 18.12 |      | 15.20 |       |      |     |      |     |       |      | 29.71 |     |     |     |       |       |      |     | 100   | 107          |                      |
| S12    | 7    | 16       | Chr     |        |       | 17.83 | 21.02 |      | 10.78 |       |      |     |      |     |       | 0.54 | 49.82 |     |     |     |       |       |      |     | 100   | 106          |                      |
| S12    | 7    | 17       | Chr     |        |       | 13.95 | 18.09 |      | 11.48 |       |      |     |      |     |       | 0.41 | 56.07 |     |     |     |       |       |      |     | 100   | 104          |                      |
| S12    | 7    | 18       | Chr     |        |       | 28.46 | 14.41 |      | 15.93 |       |      |     |      |     |       |      | 41.19 |     |     |     |       |       |      |     | 100   | 108          |                      |
| S12    | 7    | 19       | Grt     | 39.90  |       | 21.17 | 30.20 | 0.84 | 4.83  | 3.06  |      |     |      |     |       |      |       |     |     |     |       |       |      |     | 100   | 112          |                      |
| S12    | 7    | 20       | Chr     |        |       | 9.10  | 21.96 |      | 9.72  |       |      |     |      |     |       |      | 59.23 |     |     |     |       |       |      |     | 100   | 108          |                      |
| S12    | 7    | 21       | Ilm     |        | 25.26 |       | 73.76 |      |       |       |      |     |      |     |       |      | 0.98  |     |     |     |       |       |      |     | 100   | 96           |                      |
| S12    | 7    | 22       | Fl      |        |       |       |       |      |       | 47.72 |      |     |      |     | 52.28 |      |       |     |     |     |       |       |      |     | 100   | 135          |                      |
| S12    | 7    | 23       | Spl     |        |       | 28.22 | 21.84 |      | 14.83 |       |      |     |      |     |       |      | 35.10 |     |     |     |       |       |      |     | 100   | 114          |                      |
| S12    | 7    | 24       | Grt     | 39.49  |       | 21.49 | 27.57 | 2.47 | 3.65  | 5.33  |      |     |      |     |       |      |       |     |     |     |       |       |      |     | 100   | 120          |                      |
| S12    | 7    | 25       | Chr     |        |       | 5.21  | 19.62 |      | 10.25 |       |      |     |      |     |       |      | 64.92 |     |     |     |       |       |      |     | 100   | 111          |                      |
| S12    | 7    | 26       | Chr     | 39.43  |       | 20.60 | 34.46 |      | 2.54  | 2.97  |      |     |      |     |       |      |       |     |     |     |       |       |      |     | 100   | 117          |                      |
| S12    | 7    | 27       | Spl     |        |       | 40.72 | 13.94 |      | 17.55 |       |      |     |      |     |       |      | 27.80 |     |     |     |       |       |      |     | 100   | 113          |                      |
| S12    | 7    | 28       | ?       | 40.08  |       | 21.17 | 22.07 | 1.18 | 0.64  | 14.85 |      |     |      |     |       |      |       |     |     |     |       |       |      |     | 100   | 117          |                      |
| S12    | 7    | 29       | Spl     |        |       | 38.40 | 15.44 |      | 16.96 |       |      |     |      |     |       |      | 29.20 |     |     |     |       |       |      |     | 100   | 109          |                      |
| S12    | 7    | 30       | Chr     |        |       | 9.60  | 21.10 |      | 10.70 |       |      |     |      |     |       | 0.40 | 58.21 |     |     |     |       |       |      |     | 100   | 108          |                      |

Table B7.1: EDS analyses of sample S12.

| Sample | Site | Position | Mineral | SiO2  | TiO2   | Al2O3 | FeO   | MnO   | MgO   | CaO   | Na2O  | K2O  | P2O5 | SO3 | F    | V2O5 | Cr2O3 | NiO  | ZnO | SrO | ZrO2  | Nb2O5 | HfO2 | WO3 | Total | Actual Total | Calculated Wt% Total |
|--------|------|----------|---------|-------|--------|-------|-------|-------|-------|-------|-------|------|------|-----|------|------|-------|------|-----|-----|-------|-------|------|-----|-------|--------------|----------------------|
| S12    | 7    | 31       | Spl     |       |        | 25.83 | 18.90 |       | 14.06 |       |       |      |      |     |      |      | 41.22 |      |     |     |       |       |      |     | 100   | 108          |                      |
| S12    | 7    | 32       | Grt     | 39.75 |        | 21.15 | 30.24 | 1.00  | 4.76  | 3.10  |       |      |      |     |      |      |       |      |     |     |       |       |      |     | 100   | 120          |                      |
| S12    | 7    | 33       | Chr     |       |        | 9.63  | 23.86 |       | 8.75  |       |       |      |      |     |      |      | 57.76 |      |     |     |       |       |      |     | 100   | 113          |                      |
| S12    | 7.2  | 1        | Bi      | 39.99 | 3.00   | 14.80 | 18.85 |       | 10.44 | 0.50  | 0.40  | 8.02 |      |     |      |      |       |      |     |     |       |       |      |     | 100   | 96           | 106                  |
| S12    | 7.2  | 2        | Qz      | 99.68 | 0.32   |       |       |       |       |       |       |      |      |     |      |      |       |      |     |     |       |       |      |     | 100   | 120          |                      |
| S12    | 7.2  | 3        | TiO2    |       | 100.00 |       |       |       |       |       |       |      |      |     |      |      |       |      |     |     |       |       |      |     | 100   | 108          |                      |
| S12    | 7.2  | 4        | TiO2 +  | 2.51  | 94.75  | 1.06  | 0.90  |       | 0.38  |       |       | 0.40 |      |     |      |      |       |      |     |     |       |       |      |     | 100   | 107          |                      |
| S12    | 7.3  | 1        | Ab      | 68.54 |        | 19.28 |       |       |       | 0.95  | 11.23 |      |      |     |      |      |       |      |     |     |       |       |      |     | 100   | 119          |                      |
| S12    | 7.3  | 2        | Ep      | 41.09 |        | 28.94 | 1.23  |       | 2.30  | 23.43 |       |      |      |     |      |      |       |      |     |     |       |       |      |     | 97    | 107          |                      |
| S12    | 8    | 1        | Opx     | 57.65 |        | 3.18  | 4.82  |       | 29.05 | 4.61  |       |      |      |     |      |      | 0.69  |      |     |     |       |       |      |     | 100   | 115          |                      |
| S12    | 8    | 2        | Opx     | 56.62 |        | 3.17  | 5.66  |       | 33.58 | 0.31  |       |      |      |     |      |      | 0.66  |      |     |     |       |       |      |     | 100   | 115          |                      |
| S12    | 8    | 3        | Zrn     | 31.46 |        |       |       |       |       |       |       |      |      |     |      |      |       |      |     |     | 68.54 |       |      |     | 100   | 113          |                      |
| S12    | 8    | 4        | Grt     | 40.57 |        | 21.69 | 20.90 | 0.43  | 6.07  | 10.33 |       |      |      |     |      |      |       |      |     |     |       |       |      |     | 100   | 111          |                      |
| S12    | 8    | 5        | Grt     | 39.55 |        | 20.76 | 26.95 | 3.66  | 0.72  | 8.36  |       |      |      |     |      |      |       |      |     |     |       |       |      |     | 100   | 111          |                      |
| S12    | 8    | 6        | Grt     | 39.66 | 1.28   | 20.33 | 18.27 | 9.63  | 1.42  | 9.40  |       |      |      |     |      |      |       |      |     |     |       |       |      |     | 100   | 111          |                      |
| S12    | 8    | 7        | Chr     |       |        | 11.01 | 22.21 |       | 9.46  |       |       |      |      |     |      | 0.39 | 56.93 |      |     |     |       |       |      |     | 100   | 105          |                      |
| S12    | 8    | 8        | Qz +    | 95.58 |        | 1.88  | 2.04  |       |       | 0.50  |       |      |      |     |      |      |       |      |     |     |       |       |      |     | 100   | 196          |                      |
| S12    | 8    | 9        | Zrn     | 30.93 |        |       |       |       |       |       |       |      |      |     |      |      |       |      |     |     | 67.61 |       | 1.46 |     | 100   | 121          |                      |
| S12    | 8    | 10       | Chr     |       |        | 12.96 | 17.11 |       | 10.88 |       |       |      |      |     |      |      | 59.05 |      |     |     |       |       |      |     | 100   | 106          |                      |
| S12    | 8    | 11       | Zrn     | 31.11 |        |       |       |       |       |       |       |      |      |     |      |      |       |      |     |     | 68.89 |       |      |     | 100   | 119          |                      |
| S12    | 8    | 12       | Grt     | 39.50 |        | 21.01 | 32.36 | 2.58  | 3.42  | 1.13  |       |      |      |     |      |      |       |      |     |     |       |       |      |     | 100   | 112          |                      |
| S12    | 8    | 13       | Zrn     | 31.25 |        |       |       |       |       |       |       |      |      |     |      |      |       |      |     |     | 68.75 |       |      |     | 100   | 118          |                      |
| S12    | 8    | 14       | Zrn     | 31.11 |        |       |       |       |       |       |       |      |      |     |      |      |       |      |     |     | 68.89 |       |      |     | 100   | 123          |                      |
| S12    | 8    | 15       | Zrn     | 31.03 |        |       |       |       |       |       |       |      |      |     |      |      |       |      |     |     | 67.60 |       | 1.37 |     | 100   | 127          |                      |
| S12    | 8    | 16       | Chr     |       |        | 9.35  | 27.45 |       | 6.13  |       |       |      |      |     |      |      | 57.07 |      |     |     |       |       |      |     | 100   | 106          |                      |
| S12    | 8    | 17       | Chr     |       |        | 8.97  | 23.98 |       | 8.18  |       |       |      |      |     |      |      | 58.86 |      |     |     |       |       |      |     | 100   | 108          |                      |
| S12    | 8    | 18       | Chr     |       | 0.72   | 22.25 | 24.66 |       | 11.77 |       |       |      |      |     |      |      | 40.61 |      |     |     |       |       |      |     | 100   | 109          |                      |
| S12    | 8    | 19       | Grt     | 40.38 |        | 21.38 | 28.38 | 0.34  | 6.93  | 2.60  |       |      |      |     |      |      |       |      |     |     |       |       |      |     | 100   | 115          |                      |
| S12    | 8    | 20       | Chr     |       |        | 7.29  | 22.96 |       | 8.04  |       |       |      |      |     |      |      | 61.70 |      |     |     |       |       |      |     | 100   | 107          |                      |
| S12    | 8    | 21       | TiO2    |       | 99.58  |       | 0.42  |       |       |       |       |      |      |     |      |      |       |      |     |     |       |       |      |     | 100   | 106          |                      |
| S12    | 8    | 22       | Grt     | 39.93 |        | 20.98 | 27.79 | 0.70  | 2.09  | 8.51  |       |      |      |     |      |      |       |      |     |     |       |       |      |     | 100   | 115          |                      |
| S12    | 8    | 23       | Chr     |       |        | 23.05 | 16.70 |       | 13.47 |       |       |      |      |     |      |      | 46.78 |      |     |     |       |       |      |     | 100   | 113          |                      |
| S12    | 8    | 24       | Chr     |       |        | 23.30 | 16.56 |       | 13.66 |       |       |      |      |     |      |      | 46.47 |      |     |     |       |       |      |     | 100   | 109          |                      |
| S12    | 8    | 25       | Chr     |       | 0.36   | 12.79 | 24.47 |       | 8.65  |       |       |      |      |     |      |      | 53.73 |      |     |     |       |       |      |     | 100   | 107          |                      |
| S12    | 8    | 26       | TiO2    |       | 99.63  |       | 0.37  |       |       |       |       |      |      |     |      |      |       |      |     |     |       |       |      |     | 100   | 107          |                      |
| S12    | 8    | 27       | Grt     | 40.94 | 0.28   | 18.57 | 8.32  | 25.15 | 0.64  | 4.15  |       |      |      |     | 1.96 |      |       |      |     |     |       |       |      |     | 100   | 119          |                      |
| S12    | 8    | 28       | Grt     | 39.60 |        | 20.82 | 30.75 | 0.42  | 1.89  | 6.52  |       |      |      |     |      |      |       |      |     |     |       |       |      |     | 100   | 116          |                      |
| S12    | 8    | 29       | Grt     | 39.60 |        | 21.00 | 34.23 |       | 2.61  | 2.57  |       |      |      |     |      |      |       |      |     |     |       |       |      |     | 100   | 116          |                      |
| S12    | 8    | 30       | Chr     |       |        | 21.90 | 15.42 |       | 14.22 |       |       |      |      |     |      |      | 48.46 |      |     |     |       |       |      |     | 100   | 112          |                      |
| S12    | 8    | 31       | Chr     |       |        | 8.24  | 26.05 |       | 8.75  |       |       |      |      |     |      |      | 56.97 |      |     |     |       |       |      |     | 100   | 112          |                      |
| S12    | 8    | 32       | Spl     |       |        | 47.14 | 13.80 |       | 18.38 |       |       |      |      |     |      |      | 20.37 | 0.31 |     |     |       |       |      |     | 100   | 119          |                      |
| S12    | 8    | 33       | Spl     |       |        | 26.45 | 16.13 |       | 14.72 |       |       |      |      |     |      |      | 42.70 |      |     |     |       |       |      |     | 100   | 118          |                      |
| S12    | 8    | 34       | Chr     |       |        | 15.23 | 20.24 |       | 9.86  |       |       |      |      |     |      |      | 54.67 |      |     |     |       |       |      |     | 100   | 115          |                      |
| S12    | 8    | 35       | Grt     | 39.63 |        | 20.46 | 22.98 | 6.90  | 0.80  | 9.24  |       |      |      |     |      |      |       |      |     |     |       |       |      |     | 100   | 117          |                      |
| S12    | 8    | 36       | Grt     | 39.55 |        | 20.74 | 31.75 | 1.80  | 1.41  | 4.75  |       |      |      |     |      |      |       |      |     |     |       |       |      |     | 100   | 116          |                      |
| S12    | 8    | 37       | Chr     |       |        | 9.40  | 23.17 |       | 8.40  |       |       |      |      |     |      | 0.42 | 58.61 |      |     |     |       |       |      |     | 100   | 110          |                      |

Table B7.1: EDS analyses of sample S12.

| Sample | Site | Position | Mineral | SiO2  | TiO2   | Al2O3 | FeO   | MnO  | MgO   | CaO   | Na2O | K2O  | P2O5 | SO3   | F    | V2O5 | Cr2O3 | NiO | ZnO | SrO | ZrO2  | Nb2O5 | HfO2 | WO3 | Total | Actual Total | Calculated Wt% Total |
|--------|------|----------|---------|-------|--------|-------|-------|------|-------|-------|------|------|------|-------|------|------|-------|-----|-----|-----|-------|-------|------|-----|-------|--------------|----------------------|
| S12    | 8.2  | 1        | Pg      | 44.63 | 0.54   | 36.62 | 0.59  |      |       | 0.48  | 7.23 | 0.81 |      |       | 4.10 |      |       |     |     |     |       |       |      |     | 95    | 117          |                      |
| S12    | 8.2  | 2        | Ilm     |       | 53.01  |       | 45.64 | 1.35 |       |       |      |      |      |       |      |      |       |     |     |     |       |       |      |     | 100   | 105          |                      |
| S12    | 8.2  | 3        | Ms      | 47.71 | 0.99   | 29.78 | 2.05  |      | 1.70  |       | 1.21 | 8.77 |      |       | 2.79 |      |       |     |     |     |       |       |      |     | 95    | 113          |                      |
| S12    | 8.2  | 4        | TiO2    |       | 98.07  |       | 1.93  |      |       |       |      |      |      |       |      |      |       |     |     |     |       |       |      |     | 100   | 107          |                      |
| S12    | 8.2  | 5        | TiO2    |       | 96.81  |       | 3.19  |      |       |       |      |      |      |       |      |      |       |     |     |     |       |       |      |     | 100   | 107          |                      |
| S12    | 8.2  | 6        | Ilm     |       | 53.41  |       | 45.39 | 1.20 |       |       |      |      |      |       |      |      |       |     |     |     |       |       |      |     | 100   | 106          |                      |
| S12    | 8.2  | 7        | "Ilm"   |       | 73.40  |       | 24.92 | 1.68 |       |       |      |      |      |       |      |      |       |     |     |     |       |       |      |     | 100   | 99           |                      |
| S12    | 8.3  | 1        | TiO2    | 0.78  | 91.90  |       | 6.59  |      |       | 0.73  |      |      |      |       |      |      |       |     |     |     |       |       |      |     | 100   | 106          |                      |
| S12    | 8.3  | 2        | Chl +   | 28.85 | 2.70   | 14.84 | 20.53 | 0.33 | 15.60 | 1.90  |      |      |      |       |      |      | 0.24  |     |     |     |       |       |      |     | 85    | 101          |                      |
| S12    | 8.3  | 3        | Ttn     | 33.90 | 34.01  | 2.68  | 1.75  |      |       | 27.65 |      |      |      |       |      |      |       |     |     |     |       |       |      |     | 100   | 112          |                      |
| S12    | 9    | 1        | Zrn     | 30.98 |        |       |       |      |       |       |      |      |      |       |      |      |       |     |     |     | 69.02 |       |      |     | 100   | 119          |                      |
| S12    | 9    | 2        | Po      | 0.18  |        |       | 42.79 |      |       |       |      |      |      | 56.82 |      |      | 0.21  |     |     |     |       |       |      |     | 100   | 200          |                      |
| S12    | 9    | 3        | Grt     | 40.47 |        | 21.46 | 26.09 | 2.76 | 8.00  | 1.22  |      |      |      |       |      |      |       |     |     |     |       |       |      |     | 100   | 112          |                      |
| S12    | 9    | 4        | Chr     |       |        | 5.84  | 21.15 |      | 8.46  |       |      |      |      |       |      |      | 64.55 |     |     |     |       |       |      |     | 100   | 105          |                      |
| S12    | 9    | 5        | Grt     | 40.11 |        | 21.16 | 31.50 | 1.04 | 5.30  | 0.89  |      |      |      |       |      |      |       |     |     |     |       |       |      |     | 100   | 110          |                      |
| S12    | 9    | 6        | Zrn     | 31.33 |        |       |       |      |       |       |      |      |      |       |      |      |       |     |     |     | 68.67 |       |      |     | 100   | 114          |                      |
| S12    | 9    | 7        | Zrn     | 31.06 |        |       |       |      |       |       |      |      |      |       |      |      |       |     |     |     | 68.94 |       |      |     | 100   | 114          |                      |
| S12    | 9    | 8        | Chr     |       |        | 22.20 | 18.28 |      | 13.38 |       |      |      |      |       |      |      | 46.14 |     |     |     |       |       |      |     | 100   | 105          |                      |
| S12    | 9    | 9        | Spl     |       |        | 32.17 | 19.32 |      | 15.18 |       |      |      |      |       |      | 0.34 | 32.98 |     |     |     |       |       |      |     | 100   | 109          |                      |
| S12    | 9    | 10       | Grt     | 39.09 |        | 20.66 | 29.51 | 7.28 | 2.52  | 0.94  |      |      |      |       |      |      |       |     |     |     |       |       |      |     | 100   | 111          |                      |
| S12    | 9    | 11       | Chr     |       |        | 11.27 | 19.83 |      | 10.48 |       |      |      |      |       |      |      | 58.43 |     |     |     |       |       |      |     | 100   | 107          |                      |
| S12    | 9    | 12       | Zrn     | 31.60 |        | 0.48  | 0.64  |      |       |       | 0.44 |      |      |       | 2.64 |      |       |     |     |     | 64.20 |       |      |     | 100   | 70           |                      |
| S12    | 9    | 13       | Zrn     | 31.68 |        |       |       |      |       |       |      |      |      |       |      |      |       |     |     |     | 68.32 |       |      |     | 100   | 121          |                      |
| S12    | 9    | 14       | Zrn     | 31.02 |        |       |       |      |       |       |      |      |      |       |      |      |       |     |     |     | 67.36 | 1.62  |      |     | 100   | 126          |                      |
| S12    | 9    | 15       | Zrn     | 30.65 |        |       |       |      |       |       |      |      |      |       |      |      |       |     |     |     | 67.77 | 1.58  |      |     | 100   | 126          |                      |
| S12    | 9    | 16       | TiO2    |       | 100.00 |       |       |      |       |       |      |      |      |       |      |      |       |     |     |     |       |       |      |     | 100   | 110          |                      |
| S12    | 9    | 17       | Spl     |       |        | 26.31 | 20.94 |      | 13.81 |       |      |      |      |       |      |      | 38.94 |     |     |     |       |       |      |     | 100   | 110          |                      |
| S12    | 9    | 18       | Chr     |       |        | 10.26 | 18.21 |      | 10.94 |       |      |      |      |       |      | 0.42 | 60.18 |     |     |     |       |       |      |     | 100   | 108          |                      |
| S12    | 9    | 19       | Chr     |       |        | 20.48 | 23.87 |      | 10.31 |       |      |      |      |       |      |      | 45.34 |     |     |     |       |       |      |     | 100   | 107          |                      |
| S12    | 9    | 20       | Mix     | 29.19 |        | 13.33 | 9.39  |      | 29.20 | 1.00  | 0.57 |      |      |       |      |      | 17.31 |     |     |     |       |       |      |     | 100   | 111          |                      |
| S12    | 9    | 21       | Zrn     | 31.07 |        |       |       |      |       |       |      |      |      |       |      |      |       |     |     |     | 68.93 |       |      |     | 100   | 114          |                      |
| S12    | 9    | 22       | Spl     |       | 0.65   | 28.55 | 23.90 |      | 12.40 |       |      |      |      |       |      |      | 34.51 |     |     |     |       |       |      |     | 100   | 105          |                      |
| S12    | 9    | 23       | Opx     | 55.62 |        | 3.69  | 5.77  |      | 33.21 | 0.74  |      |      |      |       |      |      | 0.97  |     |     |     |       |       |      |     | 100   | 118          |                      |
| S12    | 9    | 24       | Spl     |       | 0.50   | 29.32 | 19.56 |      | 13.98 |       |      |      |      |       |      |      | 36.64 |     |     |     |       |       |      |     | 100   | 111          |                      |
| S12    | 9    | 25       | Grt     | 39.58 |        | 21.37 | 31.13 | 2.61 | 4.44  | 0.87  |      |      |      |       |      |      |       |     |     |     |       |       |      |     | 100   | 116          |                      |
| S12    | 9    | 26       | Chr     |       |        | 15.25 | 18.99 |      | 11.57 |       |      |      |      |       |      | 0.49 | 53.70 |     |     |     |       |       |      |     | 100   | 110          |                      |
| S12    | 9    | 27       | Grt     | 41.35 |        | 21.88 | 21.95 | 0.42 | 10.64 | 3.77  |      |      |      |       |      |      |       |     |     |     |       |       |      |     | 100   | 115          |                      |
| S12    | 9    | 28       | Grt     | 39.46 |        | 21.13 | 31.96 | 1.99 | 4.38  | 1.08  |      |      |      |       |      |      |       |     |     |     |       |       |      |     | 100   | 116          |                      |
| S12    | 9    | 29       | Spl     |       |        | 28.16 | 17.95 |      | 15.13 |       |      |      |      |       |      |      | 38.75 |     |     |     |       |       |      |     | 100   | 111          |                      |
| S12    | 9    | 30       | Ilm     |       | 48.91  |       | 49.20 | 1.88 |       |       |      |      |      |       |      |      |       |     |     |     |       |       |      |     | 100   | 104          |                      |
| S12    | 9    | 31       | Spl     |       |        | 49.50 | 13.67 |      | 18.38 |       |      |      |      |       |      |      | 18.45 |     |     |     |       |       |      |     | 100   | 117          |                      |
| S12    | 9    | 32       | Chr     |       |        | 23.27 | 18.36 |      | 12.80 |       |      |      |      |       |      | 0.39 | 45.17 |     |     |     |       |       |      |     | 100   | 115          |                      |
| S12    | 9    | 33       | Chr     |       | 1.85   | 22.50 | 27.29 |      | 10.13 |       |      |      |      |       |      |      | 38.23 |     |     |     |       |       |      |     | 100   | 113          |                      |
| S12    | 9    | 34       | Chr     |       |        | 5.71  | 28.07 |      | 6.72  |       |      |      |      |       |      | 0.48 | 59.02 |     |     |     |       |       |      |     | 100   | 111          |                      |
| S12    | 9    | 35       | Chr     |       | 0.73   | 18.72 | 23.82 |      | 10.98 |       |      |      |      |       |      |      | 45.76 |     |     |     |       |       |      |     | 100   | 113          |                      |
| S12    | 9    | 36       | Spl     | 1.61  | 0.33   | 25.84 | 16.82 |      | 14.86 |       |      |      |      |       |      |      | 40.54 |     |     |     |       |       |      |     | 100   | 114          |                      |



Table B7.1: EDS analyses of sample S12.

| Sample | Site | Position | Mineral      | SiO2  | TiO2  | Al2O3 | FeO   | MnO  | MgO   | CaO   | Na2O | K2O  | P2O5 | SO3 | F    | V2O5 | Cr2O3 | NiO  | ZnO  | SrO | ZrO2  | Nb2O5 | HfO2 | WO3 | Total | Actual Total | Calculated Wt% Total |
|--------|------|----------|--------------|-------|-------|-------|-------|------|-------|-------|------|------|------|-----|------|------|-------|------|------|-----|-------|-------|------|-----|-------|--------------|----------------------|
| S12    | 9    | 37       | Ep           | 39.97 |       | 22.51 | 11.28 |      |       | 22.16 |      |      |      |     |      |      | 1.09  |      |      |     |       |       |      |     | 97    | 112          |                      |
| S12    | 9    | 38       | Opx          | 55.77 |       | 4.13  | 5.69  |      | 32.84 | 0.66  |      |      |      |     |      |      | 0.91  |      |      |     |       |       |      |     | 100   | 121          |                      |
| S12    | 9.2  | 1        | Qz           | 99.69 | 0.31  |       |       |      |       |       |      |      |      |     |      |      |       |      |      |     |       |       |      |     | 100   | 120          |                      |
| S12    | 9.2  | 2        | TiO2         | 0.42  | 99.58 |       |       |      |       |       |      |      |      |     |      |      |       |      |      |     |       |       |      |     | 100   | 108          |                      |
| S12    | 9.2  | 3        | Qz           | 98.50 | 0.25  | 1.02  |       |      |       |       |      | 0.23 |      |     |      |      |       |      |      |     |       |       |      |     | 100   | 121          |                      |
| S12    | 10   | 1        | Qz           | 99.73 |       |       | 0.27  |      |       |       |      |      |      |     |      |      |       |      |      |     |       |       |      |     | 100   | 117          |                      |
| S12    | 10   | 2        | Spl          |       |       | 44.22 | 15.92 |      | 16.88 |       |      |      |      |     |      |      | 22.99 |      |      |     |       |       |      |     | 100   | 107          |                      |
| S12    | 10   | 3        | Chr          |       |       | 24.93 | 20.80 |      | 12.50 |       |      |      |      |     |      |      | 41.78 |      |      |     |       |       |      |     | 100   | 104          |                      |
| S12    | 10   | 4        | Opx          | 56.27 |       | 3.19  | 5.65  |      | 33.88 | 0.42  |      |      |      |     |      |      | 0.59  |      |      |     |       |       |      |     | 100   | 118          |                      |
| S12    | 10   | 5        | Chr          |       |       | 3.85  | 47.95 |      | 4.71  |       |      |      |      |     |      |      | 43.50 |      |      |     |       |       |      |     | 100   | 101          |                      |
| S12    | 10   | 6        | Spl          |       | 1.17  | 19.39 | 30.08 |      | 8.86  |       |      |      |      |     |      | 0.48 | 39.47 |      | 0.54 |     |       |       |      |     | 100   | 105          |                      |
| S12    | 10   | 7        | Grt          | 39.69 |       | 20.77 | 30.84 | 3.95 | 2.75  | 2.01  |      |      |      |     |      |      |       |      |      |     |       |       |      |     | 100   | 110          |                      |
| S12    | 10   | 8        | Grt          | 39.93 |       | 21.13 | 26.57 | 1.24 | 2.35  | 8.78  |      |      |      |     |      |      |       |      |      |     |       |       |      |     | 100   | 111          |                      |
| S12    | 10   | 9        | Spl          |       |       | 27.54 | 16.31 |      | 14.34 |       |      |      |      |     |      |      | 41.82 |      |      |     |       |       |      |     | 100   | 110          |                      |
| S12    | 10   | 10       | Chr          |       |       | 21.37 | 23.52 |      | 11.56 |       |      |      |      |     |      | 0.37 | 42.65 |      | 0.52 |     |       |       |      |     | 100   | 110          |                      |
| S12    | 10   | 11       | Zrn          | 31.28 |       |       |       |      |       |       |      |      |      |     |      |      |       |      |      |     | 68.72 |       |      |     | 100   | 117          |                      |
| S12    | 10   | 12       | Spl          |       |       | 37.67 | 16.14 |      | 16.23 |       |      |      |      |     |      |      | 29.62 | 0.35 |      |     |       |       |      |     | 100   | 110          |                      |
| S12    | 10   | 13       | Chr          |       |       | 4.26  | 21.81 |      | 7.90  |       |      |      |      |     |      |      | 66.03 |      |      |     |       |       |      |     | 100   | 104          |                      |
| S12    | 10   | 14       | Zrn          | 31.40 |       |       |       |      |       |       |      |      |      |     |      |      |       |      |      |     | 68.60 |       |      |     | 100   | 113          |                      |
| S12    | 10   | 15       | Amph         | 52.54 | 0.54  | 6.14  | 4.78  |      | 19.32 | 12.36 | 0.79 |      |      |     |      |      | 0.52  |      |      |     |       |       |      |     | 97    | 116          |                      |
| S12    | 10   | 16       | Spl          |       | 0.97  | 22.24 | 27.36 |      | 10.52 |       |      |      |      |     |      | 0.37 | 38.53 |      |      |     |       |       |      |     | 100   | 110          |                      |
| S12    | 10   | 17       | Spl          |       |       | 41.43 | 15.57 |      | 17.10 |       |      |      |      |     |      |      | 25.90 |      |      |     |       |       |      |     | 100   | 115          |                      |
| S12    | 10   | 18       | Chr          |       |       | 9.37  | 26.66 |      | 8.41  |       |      |      |      |     |      |      | 55.56 |      |      |     |       |       |      |     | 100   | 112          |                      |
| S12    | 10   | 19       | Chr          |       |       | 10.89 | 24.39 |      | 8.89  |       |      |      |      |     |      |      | 55.84 |      |      |     |       |       |      |     | 100   | 112          |                      |
| S12    | 10   | 20       | Spl          |       |       | 34.43 | 14.08 |      | 17.14 |       |      |      |      |     |      |      | 34.35 |      |      |     |       |       |      |     | 100   | 115          |                      |
| S12    | 10   | 21       | Spl          |       | 0.57  | 28.47 | 22.34 |      | 14.65 |       |      |      |      |     |      |      | 33.98 |      |      |     |       |       |      |     | 100   | 114          |                      |
| S12    | 10   | 22       | Zrn          | 31.13 |       |       |       |      |       |       |      |      |      |     |      |      |       |      |      |     | 67.55 |       | 1.32 |     | 100   | 124          |                      |
| S12    | 10   | 23       | Zrn          | 31.28 |       |       |       |      |       |       |      |      |      |     |      |      |       |      |      |     | 68.72 |       |      |     | 100   | 121          |                      |
| S12    | 10   | 24       | Zrn          | 31.01 |       |       |       |      |       |       |      |      |      |     |      |      |       |      |      |     | 67.51 |       | 1.48 |     | 100   | 120          |                      |
| S12    | 10   | 25       | Zrn          | 31.62 |       |       |       |      |       |       |      |      |      |     |      |      |       |      |      |     | 68.38 |       |      |     | 100   | 118          |                      |
| S12    | 10   | 26       | Spl          |       |       | 31.43 | 16.25 |      | 15.87 |       |      |      |      |     |      | 0.42 | 36.03 |      |      |     |       |       |      |     | 100   | 110          |                      |
| S12    | 10   | 27       | Chr          |       |       | 8.28  | 24.69 |      | 8.05  |       |      |      |      |     |      |      | 58.98 |      |      |     |       |       |      |     | 100   | 106          |                      |
| S12    | 10   | 28       | Spl          |       |       | 28.35 | 19.38 |      | 14.05 |       |      |      |      |     |      |      | 38.22 |      |      |     |       |       |      |     | 100   | 113          |                      |
| S12    | 10.2 | 1        | Ttn          | 33.72 | 29.88 | 4.28  | 4.00  |      | 0.36  | 27.76 |      |      |      |     |      |      |       |      |      |     |       |       |      |     | 100   | 112          |                      |
| S12    | 10.2 | 2        | Ilm          |       | 51.89 |       | 43.06 | 2.38 | 1.95  |       |      |      |      |     |      |      | 0.72  |      |      |     |       |       |      |     | 100   | 107          |                      |
| S12    | 10.2 | 3        | TiO2         |       | 82.54 |       | 15.45 |      | 2.01  |       |      |      |      |     |      |      |       |      |      |     |       |       |      |     | 100   | 104          |                      |
| S12    | 10.3 | 1        | ?Mica or Mix | 46.84 |       | 12.02 | 1.56  |      | 27.68 |       | 3.00 | 3.09 |      |     | 2.46 |      | 3.35  |      |      |     |       |       |      |     | 100   | 100          |                      |
| S12    | 10.3 | 2        | Chr          |       |       | 6.65  | 23.65 |      | 7.93  |       |      |      |      |     |      |      | 61.77 |      |      |     |       |       |      |     | 100   | 110          |                      |
| S12    | 10.3 | 3        | ?Mica        | 47.16 |       | 13.16 | 1.33  |      | 28.44 |       | 5.19 | 1.93 |      |     |      |      | 2.79  |      |      |     |       |       |      |     | 100   | 115          |                      |
| S12    | 11   | 1        | Zrn          | 31.18 |       |       |       |      |       |       |      |      |      |     |      |      |       |      |      |     | 68.82 |       |      |     | 100   | 118          |                      |
| S12    | 11   | 2        | Zrn          | 31.28 |       |       |       |      |       |       |      |      |      |     |      |      |       |      |      |     | 68.72 |       |      |     | 100   | 116          |                      |
| S12    | 11   | 3        | Chr          |       |       | 19.70 | 22.68 |      | 11.63 |       |      |      |      |     |      | 0.44 | 45.56 |      |      |     |       |       |      |     | 100   | 106          |                      |
| S12    | 11   | 4        | Grt          | 40.24 |       | 21.12 | 26.98 | 0.66 | 4.27  | 6.43  |      |      |      |     |      |      | 0.31  |      |      |     |       |       |      |     | 100   | 109          |                      |
| S12    | 11   | 5        | Chr          |       |       | 16.81 | 25.68 |      | 9.10  |       |      |      |      |     |      |      | 48.41 |      |      |     |       |       |      |     | 100   | 102          |                      |
| S12    | 11   | 6        | Ilm          |       | 42.15 |       | 53.47 | 1.13 | 3.24  |       |      |      |      |     |      |      |       |      |      |     |       |       |      |     | 100   | 98           |                      |
| S12    | 11   | 7        | Chr          |       |       | 23.67 | 18.64 |      | 13.99 |       |      |      |      |     |      |      | 43.70 |      |      |     |       |       |      |     | 100   | 104          |                      |

Table B7.1: EDS analyses of sample S12.

| Sample | Site | Position | Mineral | SiO2  | TiO2  | Al2O3 | FeO   | MnO   | MgO   | CaO   | Na2O | K2O | P2O5 | SO3  | F    | V2O5 | Cr2O3 | NiO | ZnO  | SrO | ZrO2  | Nb2O5 | HfO2 | WO3 | Total | Actual Total | Calculated Wt% Total |
|--------|------|----------|---------|-------|-------|-------|-------|-------|-------|-------|------|-----|------|------|------|------|-------|-----|------|-----|-------|-------|------|-----|-------|--------------|----------------------|
| S12    | 11   | 8        | Ilm     |       | 42.00 | 0.52  | 53.13 | 1.26  | 3.09  |       |      |     |      |      |      |      |       |     |      |     |       |       |      |     | 100   | 98           |                      |
| S12    | 11   | 9        | Grt     | 39.96 |       | 21.24 | 28.82 | 3.61  | 5.22  | 1.15  |      |     |      |      |      |      |       |     |      |     |       |       |      |     | 100   | 111          |                      |
| S12    | 11   | 10       | Ttn +   | 29.50 | 42.41 |       | 2.83  |       |       | 25.26 |      |     |      |      |      |      |       |     |      |     |       |       |      |     | 100   | 109          |                      |
| S12    | 11   | 11       | Chr     |       |       | 12.50 | 19.60 |       | 10.74 |       |      |     |      |      |      |      | 57.15 |     |      |     |       |       |      |     | 100   | 107          |                      |
| S12    | 11   | 12       | Chr     |       |       | 14.30 | 20.22 |       | 10.40 |       |      |     |      |      |      |      | 55.08 |     |      |     |       |       |      |     | 100   | 111          |                      |
| S12    | 11   | 13       | Opx ?   | 55.18 |       | 3.21  | 3.15  |       | 28.00 | 7.76  | 0.81 |     |      |      |      |      | 1.88  |     |      |     |       |       |      |     | 100   | 121          |                      |
| S12    | 11   | 14       | Zrn     | 31.25 |       |       |       |       |       |       |      |     |      |      |      |      |       |     |      |     | 68.75 |       |      |     | 100   | 120          |                      |
| S12    | 11   | 15       | Chr     |       |       | 14.49 | 20.04 |       | 10.96 |       |      |     |      |      |      | 0.39 | 54.12 |     |      |     |       |       |      |     | 100   | 109          |                      |
| S12    | 11   | 16       | Grt     | 39.92 |       | 21.43 | 27.09 | 1.36  | 4.73  | 5.46  |      |     |      |      |      |      |       |     |      |     |       |       |      |     | 100   | 116          |                      |
| S12    | 11   | 17       | Zrn     | 31.04 |       |       |       |       |       |       |      |     |      |      |      |      |       |     |      |     | 68.96 |       |      |     | 100   | 121          |                      |
| S12    | 11   | 18       | Zrn     | 30.90 |       |       |       |       |       |       |      |     |      |      |      |      |       |     |      |     | 69.10 |       |      |     | 100   | 120          |                      |
| S12    | 11   | 19       | ?Grt    | 40.49 |       | 21.46 | 12.55 | 6.79  | 2.53  | 16.18 |      |     |      |      |      |      |       |     |      |     |       |       |      |     | 100   | 113          |                      |
| S12    | 11   | 20       | Chr     |       |       | 7.65  | 17.11 |       | 13.99 |       |      |     |      |      |      |      | 61.25 |     |      |     |       |       |      |     | 100   | 106          |                      |
| S12    | 11   | 21       | Chr     |       |       | 9.17  | 27.05 | 0.95  | 6.28  |       |      |     |      |      |      |      | 56.55 |     |      |     |       |       |      |     | 100   | 103          |                      |
| S12    | 11   | 22       | Chr     | 1.57  |       | 11.63 | 22.35 |       | 13.09 |       |      |     |      |      |      |      | 51.36 |     |      |     |       |       |      |     | 100   | 114          |                      |
| S12    | 11   | 23       | Grt     | 38.88 |       | 20.69 | 34.83 | 0.48  | 1.31  | 3.81  |      |     |      |      |      |      |       |     |      |     |       |       |      |     | 100   | 118          |                      |
| S12    | 11.2 | 1        | Ttn     | 34.63 | 31.48 | 3.75  | 2.38  |       | 0.86  | 26.90 |      |     |      |      |      |      |       |     |      |     |       |       |      |     | 100   | 108          |                      |
| S12    | 11.2 | 2        | Ilm     |       | 48.92 |       | 42.53 | 7.34  |       | 0.67  |      |     |      |      |      |      | 0.54  |     |      |     |       |       |      |     | 100   | 105          |                      |
| S12    | 11.2 | 3        | Ttn     | 33.83 | 29.88 | 3.67  | 3.91  |       | 1.72  | 25.57 |      |     |      | 1.41 |      |      |       |     |      |     |       |       |      |     | 100   | 108          |                      |
| S12    | 11.2 | 4        | "Ilm"   |       | 74.81 |       | 18.77 |       | 5.65  |       |      |     |      |      |      |      | 0.77  |     |      |     |       |       |      |     | 100   | 98           |                      |
| S12    | 11.3 | 1        | Cr-Chl  | 30.84 |       | 13.75 | 3.39  |       | 30.79 |       |      |     |      |      | 3.88 |      | 2.35  |     |      |     |       |       |      |     | 85    | 102          |                      |
| S12    | 11.3 | 2        | Cr-Chl  | 32.89 |       | 10.74 | 6.15  |       | 31.29 | 0.31  | 0.51 |     |      | 0.58 |      |      | 1.20  |     |      |     |       |       | 1.33 | 85  | 103   |              |                      |
| S12    | 11.3 | 3        | Chr     |       |       | 1.27  | 58.79 | 1.59  | 1.76  |       |      |     |      |      |      |      | 36.12 |     | 0.48 |     |       |       |      |     | 100   | 103          |                      |
| S12    | 11.3 | 4        | Chr     |       |       | 12.74 | 31.77 |       | 5.05  |       |      |     |      |      |      | 0.66 | 49.14 |     | 0.63 |     |       |       |      |     | 100   | 111          |                      |
| S12    | 12   | 1        | Opx     | 56.00 |       | 4.00  | 5.49  |       | 33.33 | 0.36  |      |     |      |      |      |      | 0.82  |     |      |     |       |       |      |     | 100   | 114          |                      |
| S12    | 12   | 2        | Zrn     | 30.59 |       |       |       |       |       |       |      |     |      |      |      |      |       |     |      |     | 67.85 |       | 1.56 |     | 100   | 117          |                      |
| S12    | 12   | 3        | Grt     | 39.36 |       | 21.15 | 28.74 | 5.94  | 3.19  | 1.62  |      |     |      |      |      |      |       |     |      |     |       |       |      |     | 100   | 108          |                      |
| S12    | 12   | 4        | Chr     |       |       | 25.34 | 16.97 |       | 13.89 |       |      |     |      |      |      |      | 43.81 |     |      |     |       |       |      |     | 100   | 104          |                      |
| S12    | 12   | 5        | Chr     |       |       | 6.56  | 26.73 |       | 7.73  |       |      |     |      |      |      |      | 58.98 |     |      |     |       |       |      |     | 100   | 104          |                      |
| S12    | 12   | 6        | Grt     | 39.74 |       | 20.91 | 30.35 | 4.52  | 3.75  | 0.73  |      |     |      |      |      |      |       |     |      |     |       |       |      |     | 100   | 110          |                      |
| S12    | 12   | 7        | Chr     |       |       | 17.97 | 18.46 |       | 12.06 |       |      |     |      |      |      |      | 51.51 |     |      |     |       |       |      |     | 100   | 107          |                      |
| S12    | 12   | 8        | Zrn     | 30.83 |       |       |       |       |       |       |      |     |      |      |      |      |       |     |      |     | 67.74 |       | 1.42 |     | 100   | 123          |                      |
| S12    | 12   | 9        | Ep      | 40.01 |       | 23.72 | 10.57 |       |       | 22.70 |      |     |      |      |      |      |       |     |      |     |       |       |      |     | 97    | 110          |                      |
| S12    | 12   | 10       | Tur     | 38.64 |       | 32.96 | 4.12  |       | 8.18  | 0.73  | 2.38 |     |      |      |      |      |       |     |      |     |       |       |      |     | 87    | 101          |                      |
| S12    | 12   | 11       | Chr     |       |       | 14.91 | 24.59 |       | 8.86  |       |      |     |      |      |      | 0.42 | 51.21 |     |      |     |       |       |      |     | 100   | 107          |                      |
| S12    | 12   | 12       | Opx     | 55.48 |       | 3.98  | 5.00  |       | 31.70 | 2.84  |      |     |      |      |      |      | 0.99  |     |      |     |       |       |      |     | 100   | 115          |                      |
| S12    | 12   | 13       | Spl     |       |       | 33.06 | 18.08 |       | 14.69 |       |      |     |      |      |      |      | 34.17 |     |      |     |       |       |      |     | 100   | 108          |                      |
| S12    | 12   | 14       | Grt     | 40.93 |       | 21.43 | 22.86 | 2.35  | 7.66  | 4.77  |      |     |      |      |      |      |       |     |      |     |       |       |      |     | 100   | 113          |                      |
| S12    | 12   | 15       | TiO2    | 0.46  | 99.54 |       |       |       |       |       |      |     |      |      |      |      |       |     |      |     |       |       |      |     | 100   | 107          |                      |
| S12    | 12   | 16       | Chr     |       | 0.56  | 16.67 | 27.57 |       | 10.57 |       |      |     |      |      |      | 0.45 | 44.17 |     |      |     |       |       |      |     | 100   | 106          |                      |
| S12    | 12   | 17       | Chr     |       | 0.49  | 20.05 | 26.19 |       | 10.47 |       |      |     |      |      |      | 0.38 | 42.42 |     |      |     |       |       |      |     | 100   | 108          |                      |
| S12    | 12   | 18       | Chr     |       |       | 6.04  | 25.26 |       | 7.98  |       |      |     |      |      |      |      | 60.72 |     |      |     |       |       |      |     | 100   | 105          |                      |
| S12    | 12   | 19       | Opx     | 57.33 |       | 2.97  | 5.41  |       | 31.29 | 2.23  |      |     |      |      |      |      | 0.77  |     |      |     |       |       |      |     | 100   | 115          |                      |
| S12    | 12   | 20       | Chr     |       |       | 11.61 | 27.91 |       | 7.73  |       |      |     |      |      |      |      | 52.74 |     |      |     |       |       |      |     | 100   | 111          |                      |
| S12    | 12   | 21       | Spl     |       | 0.42  | 25.83 | 18.60 |       | 15.51 |       |      |     |      |      |      |      | 39.65 |     |      |     |       |       |      |     | 100   | 113          |                      |
| S12    | 12.2 | 1        | Grt     | 39.77 | 0.54  | 21.09 | 14.19 | 14.07 | 2.30  | 8.05  |      |     |      |      |      |      |       |     |      |     |       |       |      |     | 100   | 117          |                      |

Table B7.1: EDS analyses of sample S12.

| Sample | Site | Position | Mineral | SiO2   | TiO2   | Al2O3 | FeO   | MnO  | MgO   | CaO   | Na2O | K2O | P2O5 | SO3 | F     | V2O5 | Cr2O3 | NiO | ZnO | SrO | ZrO2  | Nb2O5 | HfO2 | WO3 | Total | Actual Total | Calculated Wt% Total |
|--------|------|----------|---------|--------|--------|-------|-------|------|-------|-------|------|-----|------|-----|-------|------|-------|-----|-----|-----|-------|-------|------|-----|-------|--------------|----------------------|
| S12    | 12.2 | 2        | Qz      | 100.00 |        |       |       |      |       |       |      |     |      |     |       |      |       |     |     |     |       |       |      |     | 100   | 123          |                      |
| S12    | 12.2 | 3        | Qz      | 100.00 |        |       |       |      |       |       |      |     |      |     |       |      |       |     |     |     |       |       |      |     | 100   | 122          |                      |
| S12    | 12.3 | 1        | Cr-Chl  | 30.08  |        | 16.90 | 4.00  |      | 30.69 |       |      |     |      |     |       |      | 3.34  |     |     |     |       |       |      |     | 85    | 104          |                      |
| S12    | 12.3 | 2        | Spl     |        | 0.41   | 28.43 | 29.79 |      | 10.55 |       |      |     |      |     |       |      | 30.82 |     |     |     |       |       |      |     | 100   | 110          |                      |
| S12    | 12.3 | 3        | Cr-Chl  | 32.59  |        | 15.57 | 6.47  |      | 29.17 |       |      |     |      |     |       |      | 1.20  |     |     |     |       |       |      |     | 85    | 94           |                      |
| S12    | 12.3 | 4        | Spl     |        |        | 6.90  | 57.76 | 2.69 | 5.31  |       |      |     |      |     |       |      | 27.34 |     |     |     |       |       |      |     | 100   | 104          |                      |
| S12    | 13   | 1        | Zrn     | 31.21  |        |       |       |      |       |       |      |     |      |     |       |      |       |     |     |     | 68.79 |       |      |     | 100   | 118          |                      |
| S12    | 13   | 2        | Opx     | 55.51  |        | 4.52  | 5.23  |      | 33.23 | 0.71  |      |     |      |     |       |      | 0.79  |     |     |     |       |       |      |     | 100   | 126          |                      |
| S12    | 13   | 3        | TiO2    |        | 100.00 |       |       |      |       |       |      |     |      |     |       |      |       |     |     |     |       |       |      |     | 100   | 108          |                      |
| S12    | 13   | 4        | Zrn     | 30.82  |        |       |       |      |       |       |      |     |      |     |       |      |       |     |     |     | 67.87 |       | 1.31 |     | 100   | 123          |                      |
| S12    | 13   | 5        | Chr     |        | 0.37   | 19.90 | 31.24 |      | 8.73  |       |      |     |      |     |       |      | 39.76 |     |     |     |       |       |      |     | 100   | 109          |                      |
| S12    | 13   | 6        | Amph    | 46.22  | 0.89   | 10.78 | 4.26  |      | 18.66 | 11.09 | 2.52 |     |      |     |       |      | 2.58  |     |     |     |       |       |      |     | 97    | 114          |                      |
| S12    | 13   | 7        | Grt     | 40.17  |        | 21.06 | 30.44 | 0.85 | 3.82  | 3.66  |      |     |      |     |       |      |       |     |     |     |       |       |      |     | 100   | 116          |                      |
| S12    | 13   | 8        | Spl     | 3.66   |        | 28.77 | 18.77 |      | 14.64 | 1.38  |      |     |      |     |       |      | 32.77 |     |     |     |       |       |      |     | 100   | 111          |                      |
| S12    | 13   | 9        | Chr     |        |        | 19.14 | 21.52 |      | 10.89 |       |      |     |      |     |       |      | 48.46 |     |     |     |       |       |      |     | 100   | 109          |                      |
| S12    | 13   | 10       | Ttn     | 28.04  | 46.69  | 0.80  | 0.41  |      |       | 24.06 |      |     |      |     |       |      |       |     |     |     |       |       |      |     | 100   | 108          |                      |
| S12    | 13   | 11       | "Ilm"   |        | 62.50  |       | 33.94 | 2.21 | 1.34  |       |      |     |      |     |       |      |       |     |     |     |       |       |      |     | 100   | 99           |                      |
| S12    | 13   | 12       | Spl     |        | 0.49   | 35.82 | 17.38 |      | 16.13 |       |      |     |      |     |       |      | 30.18 |     |     |     |       |       |      |     | 100   | 106          |                      |
| S12    | 13   | 13       | Chr     |        |        | 9.89  | 21.21 |      | 8.72  |       |      |     |      |     |       |      | 60.18 |     |     |     |       |       |      |     | 100   | 105          |                      |
| S12    | 13   | 14       | Fl      |        |        |       |       |      |       | 43.37 | 0.47 |     |      |     | 56.16 |      |       |     |     |     |       |       |      |     | 100   | 125          |                      |
| S12    | 13   | 15       | Grt     | 39.39  |        | 21.18 | 31.82 | 1.61 | 4.13  | 1.87  |      |     |      |     |       |      |       |     |     |     |       |       |      |     | 100   | 112          |                      |
| S12    | 13   | 16       | Opx     | 56.31  |        | 3.27  | 5.60  |      | 33.76 | 0.30  |      |     |      |     |       |      | 0.76  |     |     |     |       |       |      |     | 100   | 116          |                      |
| S12    | 13   | 17       | Opx     | 56.33  |        | 3.41  | 5.24  |      | 33.94 | 0.46  |      |     |      |     |       |      | 0.63  |     |     |     |       |       |      |     | 100   | 121          |                      |
| S12    | 13   | 18       | Opx     | 56.28  |        | 3.31  | 5.40  |      | 32.16 | 2.23  |      |     |      |     |       |      | 0.61  |     |     |     |       |       |      |     | 100   | 123          |                      |
| S12    | 13   | 19       | Spl     |        |        | 35.83 | 17.68 |      | 16.03 |       |      |     |      |     |       |      | 30.46 |     |     |     |       |       |      |     | 100   | 115          |                      |
| S12    | 13   | 20       | Chr     |        |        | 8.02  | 25.96 |      | 9.35  |       |      |     |      |     |       |      | 56.66 |     |     |     |       |       |      |     | 100   | 110          |                      |
| S12    | 13   | 21       | TiO2    |        | 99.56  |       | 0.44  |      |       |       |      |     |      |     |       |      |       |     |     |     |       |       |      |     | 100   | 110          |                      |
| S12    | 13   | 22       | Spl     |        |        | 43.67 | 15.08 |      | 17.04 |       |      |     |      |     |       |      | 24.21 |     |     |     |       |       |      |     | 100   | 111          |                      |
| S12    | 13   | 23       | Zrn     | 30.88  |        |       |       |      |       |       |      |     |      |     |       |      |       |     |     |     | 67.75 |       | 1.38 |     | 100   | 125          |                      |
| S12    | 13.2 | 1        | Ilm     |        | 53.25  |       | 41.77 | 4.99 |       |       |      |     |      |     |       |      |       |     |     |     |       |       |      |     | 100   | 107          |                      |

Table B7.1: EDS analyses of sample S12.

| Sample | Site | Position | Mineral                                   | SiO2  | TiO2  | Al2O3 | FeO   | MnO  | MgO   | CaO   | Na2O  | K2O | P2O5 | SO3 | F | V2O5 | Cr2O3 | NiO | ZnO | SrO | ZrO2 | Nb2O5 | HfO2 | WO3 | Total | Actual Total | Calculated Wt% Total |
|--------|------|----------|-------------------------------------------|-------|-------|-------|-------|------|-------|-------|-------|-----|------|-----|---|------|-------|-----|-----|-----|------|-------|------|-----|-------|--------------|----------------------|
| S12    | 13.2 | 2        | Ttn                                       | 32.84 | 37.51 | 0.71  | 0.49  |      |       | 27.51 |       |     |      |     |   | 0.94 |       |     |     |     |      |       |      |     | 100   | 111          |                      |
| S12    | 13.2 | 3        | Ab                                        | 69.17 | 0.27  | 18.82 |       |      |       |       | 11.74 |     |      |     |   |      |       |     |     |     |      |       |      |     | 100   | 118          |                      |
| S12    | 13.3 | 1        | Ilm                                       | 1.17  | 53.01 |       | 39.93 | 5.89 |       |       |       |     |      |     |   |      |       |     |     |     |      |       |      |     | 100   | 108          |                      |
| S12    | 13.3 | 2        | Chl +                                     | 32.30 | 5.17  | 17.72 | 30.04 |      | 11.09 | 3.07  | 0.60  |     |      |     |   |      |       |     |     |     |      |       |      |     | 100   | 104          |                      |
| S12    | 13.3 | 3        | TiO2                                      |       | 98.32 |       | 1.11  |      |       | 0.57  |       |     |      |     |   |      |       |     |     |     |      |       |      |     | 100   | 108          |                      |
| S12    | 13.3 | 4        | Ttn                                       | 32.79 | 37.50 | 1.29  | 0.52  |      |       | 27.56 |       |     |      |     |   |      | 0.35  |     |     |     |      |       |      |     | 100   | 112          |                      |
|        |      |          | Notes                                     |       |       |       |       |      |       |       |       |     |      |     |   |      |       |     |     |     |      |       |      |     |       |              |                      |
|        |      |          | + = indicates other minerals present      |       |       |       |       |      |       |       |       |     |      |     |   |      |       |     |     |     |      |       |      |     |       |              |                      |
|        |      |          | " " = indicates partially altered mineral |       |       |       |       |      |       |       |       |     |      |     |   |      |       |     |     |     |      |       |      |     |       |              |                      |
|        |      |          |                                           |       |       |       |       |      |       |       |       |     |      |     |   |      |       |     |     |     |      |       |      |     |       |              |                      |
|        |      |          |                                           |       |       |       |       |      |       |       |       |     |      |     |   |      |       |     |     |     |      |       |      |     |       |              |                      |
|        |      |          |                                           |       |       |       |       |      |       |       |       |     |      |     |   |      |       |     |     |     |      |       |      |     |       |              |                      |
|        |      |          |                                           |       |       |       |       |      |       |       |       |     |      |     |   |      |       |     |     |     |      |       |      |     |       |              |                      |
|        |      |          |                                           |       |       |       |       |      |       |       |       |     |      |     |   |      |       |     |     |     |      |       |      |     |       |              |                      |
|        |      |          |                                           |       |       |       |       |      |       |       |       |     |      |     |   |      |       |     |     |     |      |       |      |     |       |              |                      |
|        |      |          |                                           |       |       |       |       |      |       |       |       |     |      |     |   |      |       |     |     |     |      |       |      |     |       |              |                      |
|        |      |          |                                           |       |       |       |       |      |       |       |       |     |      |     |   |      |       |     |     |     |      |       |      |     |       |              |                      |

B8: SEM-BSE images and EDS  
mineral analyses for sample S15.



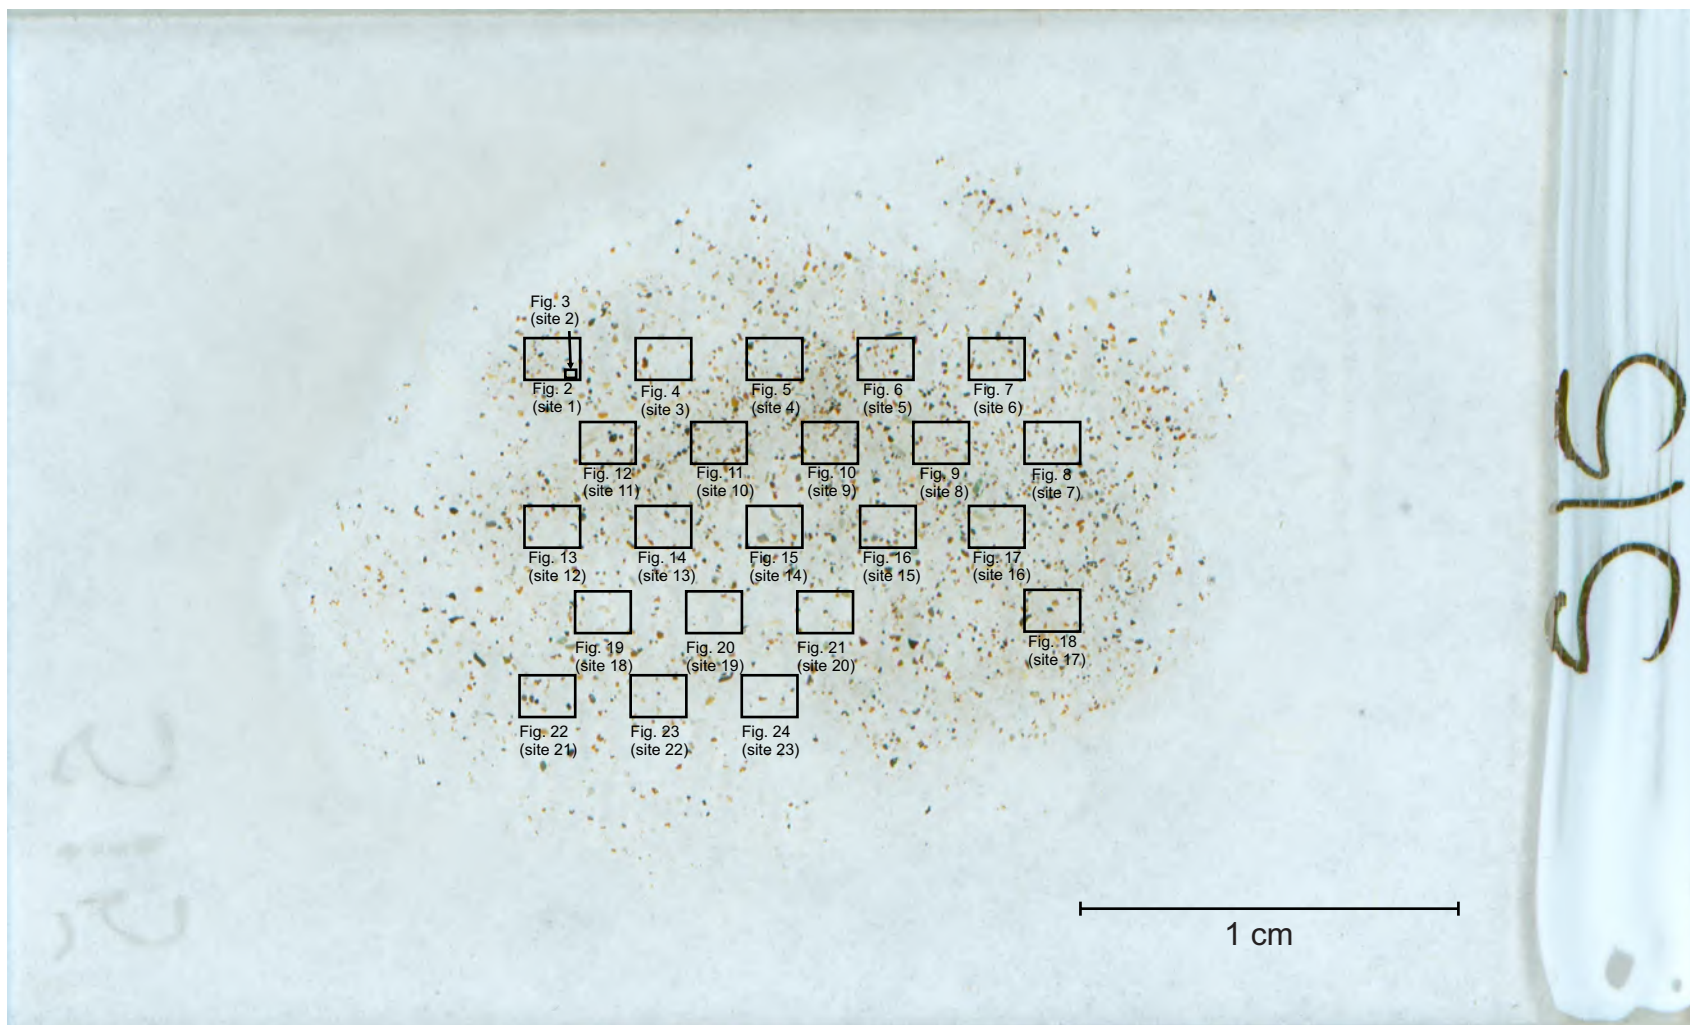

Figure B8.1: Scanned thin section of sample S15 showing the location of analysed sites. This sample is of heavy mineral separates from a sandy matrix of matrix-supported conglomerate ~ 1m below present surface.

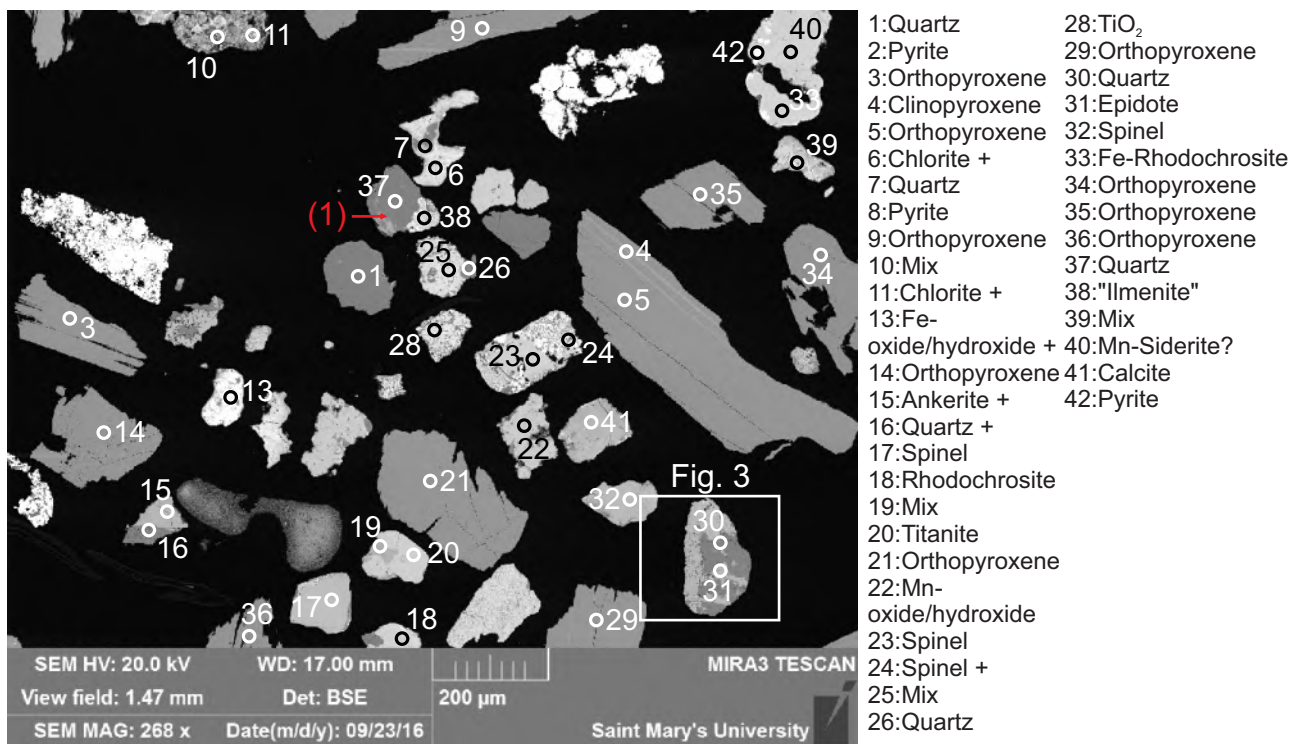

Figure B8.2: Sample S15 site 1 (SEM). 1: Lithic clast (quartz + altered ilmenite). Igneous or metamorphic.

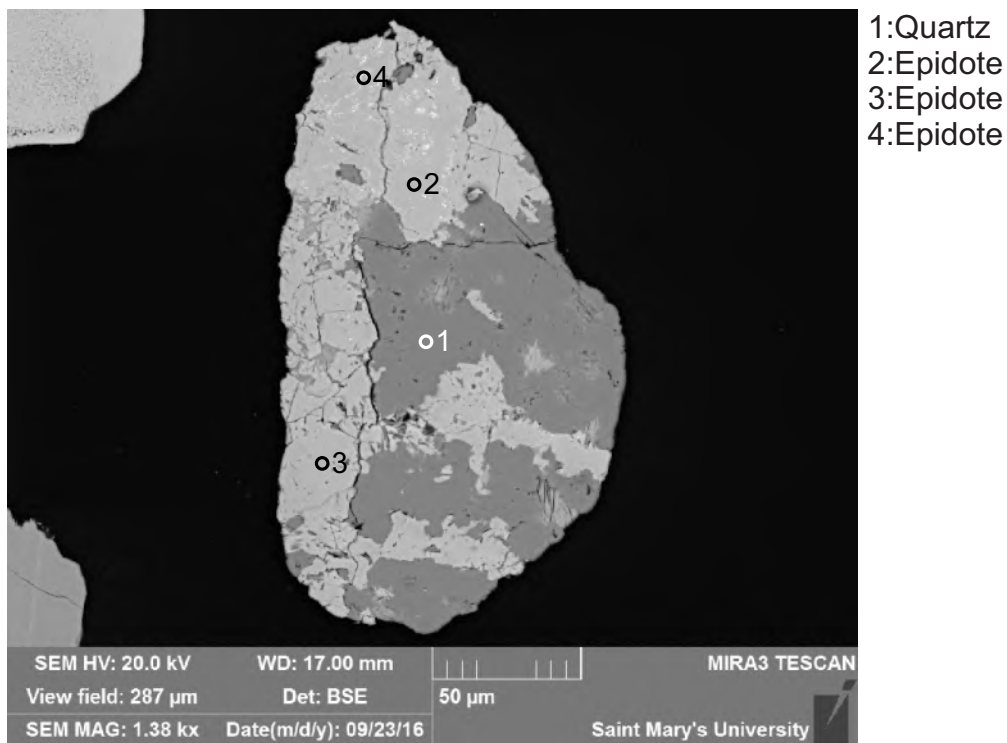

Figure B8.3: Sample S15 site 2 (SEM). Hydrothermal quartz + epidote.

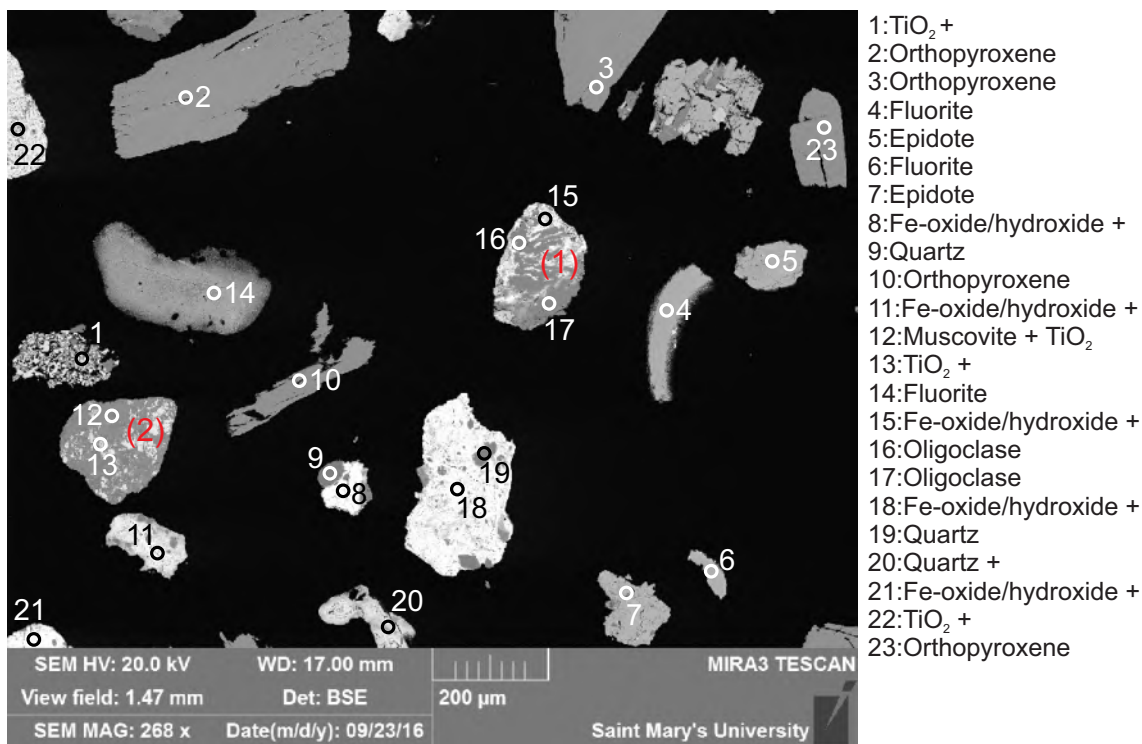

Figure B8.4: Sample S15 site 3 (SEM). 1: Lithic clast (oligoclase + Fe-oxide/hydroxide, igneous or metamorphic). 2: Lithic clast (titania + muscovite, metamorphic).

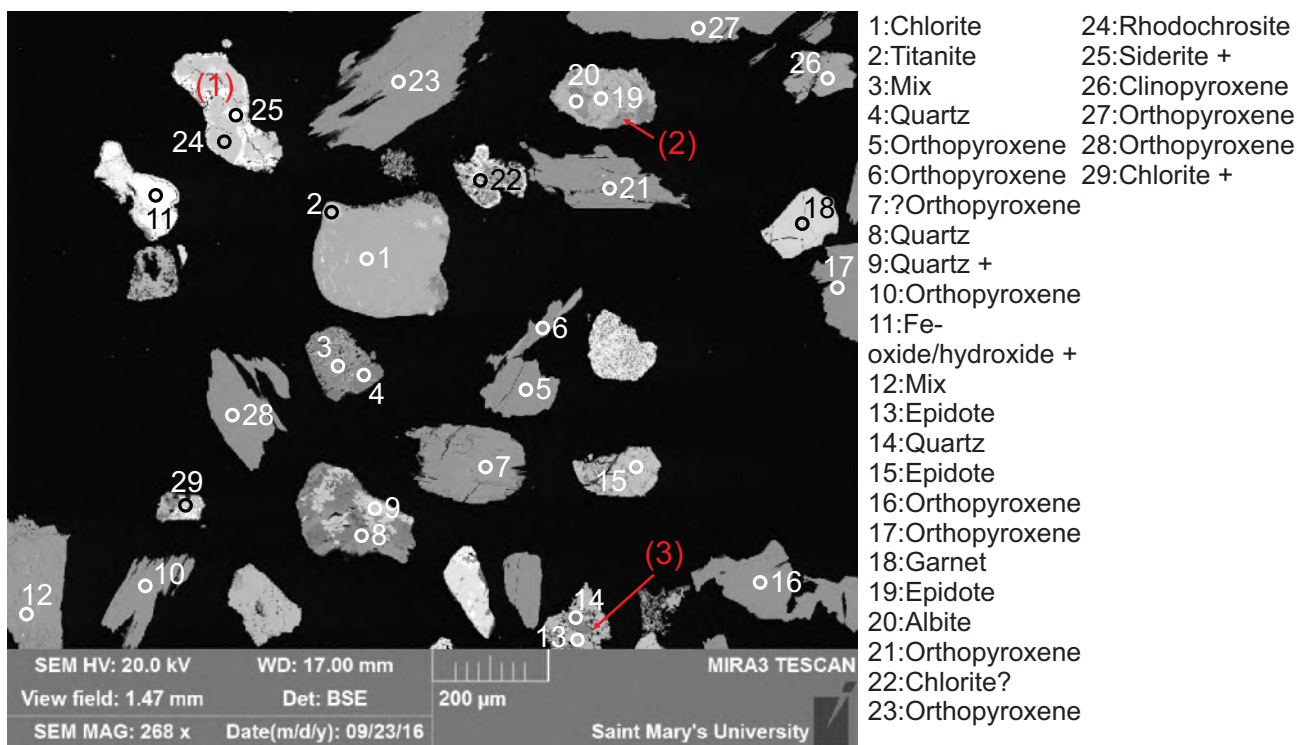

Figure B8.5: Sample S15 site 4 (SEM). 1: Lithic clast (siderite + rhodochrosite, hydrothermal). 2: Lithic clast (epidote + albite, hydrothermal vein). 3: Hydrothermal (epidote + quartz, hydrothermal vein).



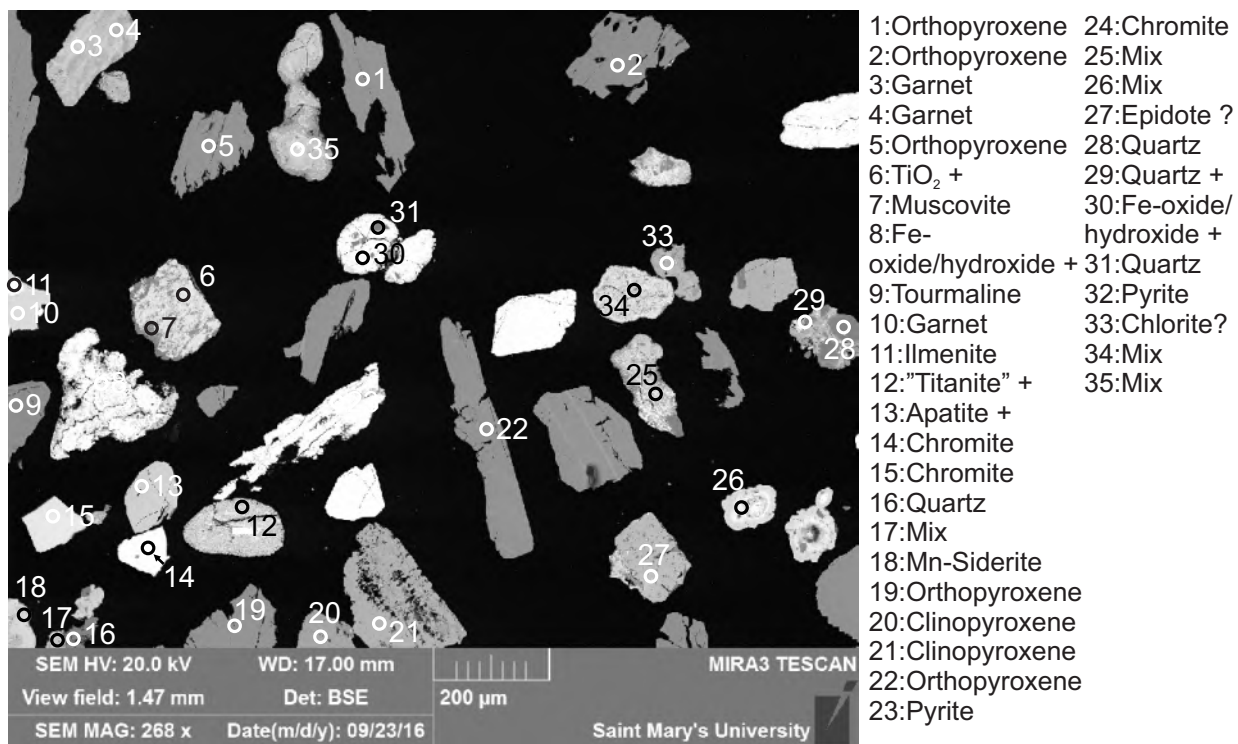

Figure B8.6: Sample S15 site 5 (SEM).

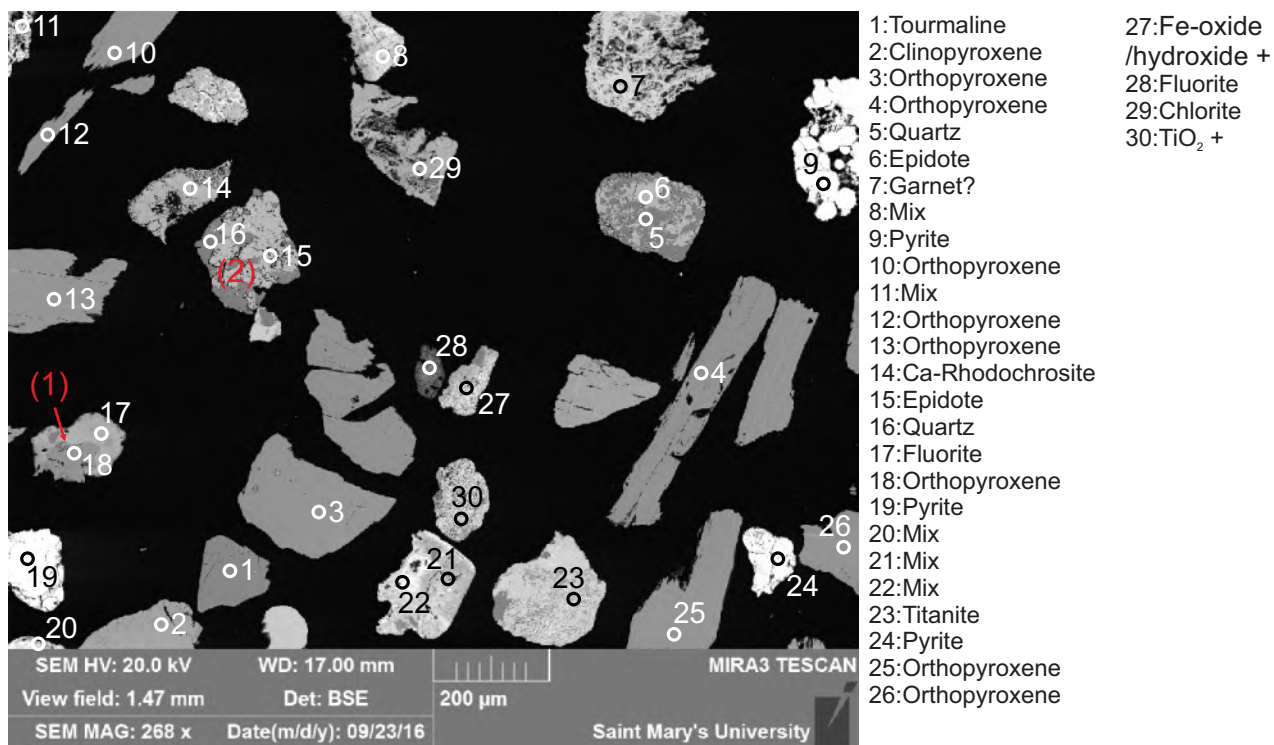

Figure B8.7: Sample S15 site 6 (SEM). 1: Lithic clast (fluorite + orthopyroxene, metaophiolite). 2: Hydrothermal lithic clast (epidote + quartz).

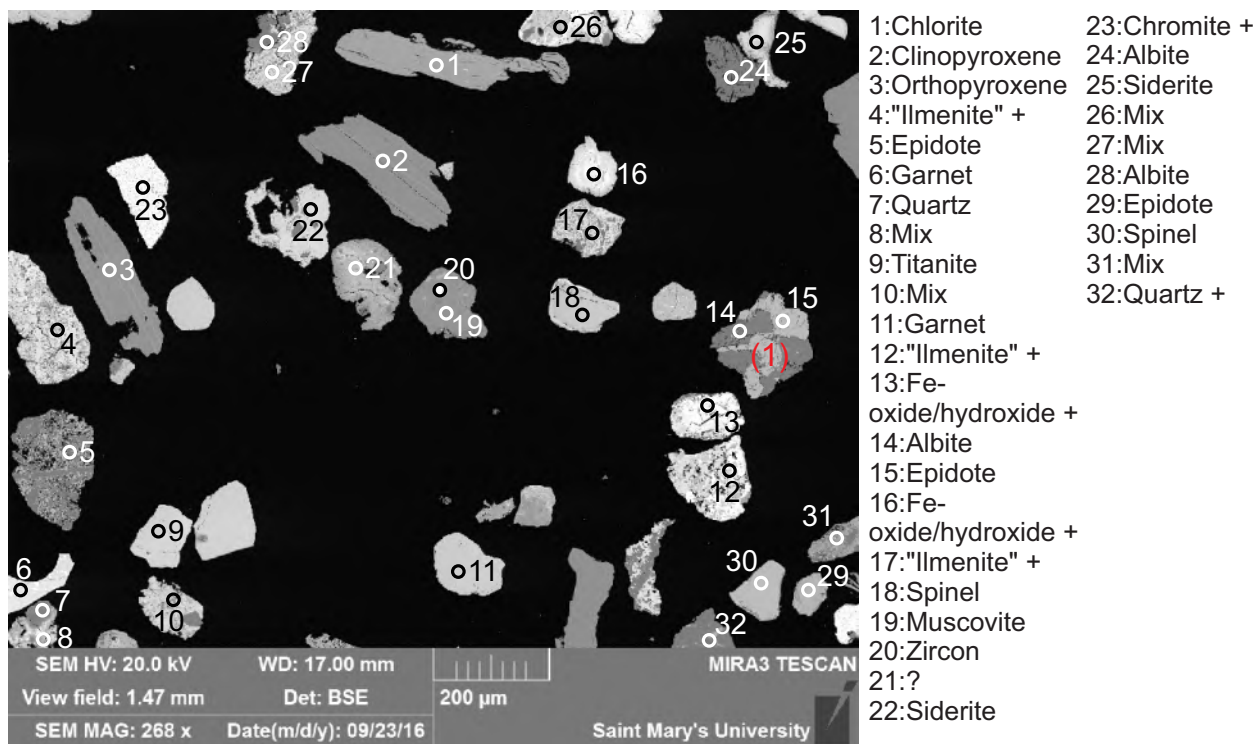

Figure B8.8: Sample S15 site 7 (SEM). 1: Lithic clast (albite + epidote, hydrothermal).

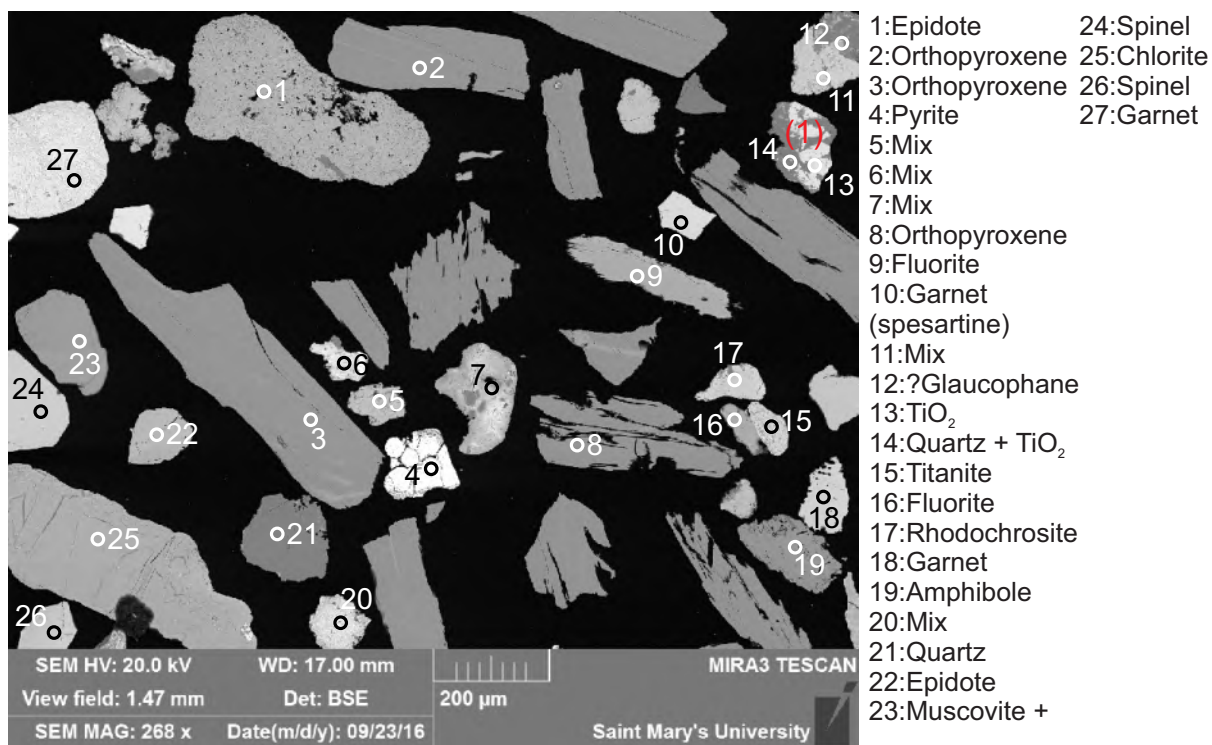

Figure B8.9: Sample S15 site 8 (SEM). 1: Lithic clast (quartz + titania, metamorphic).



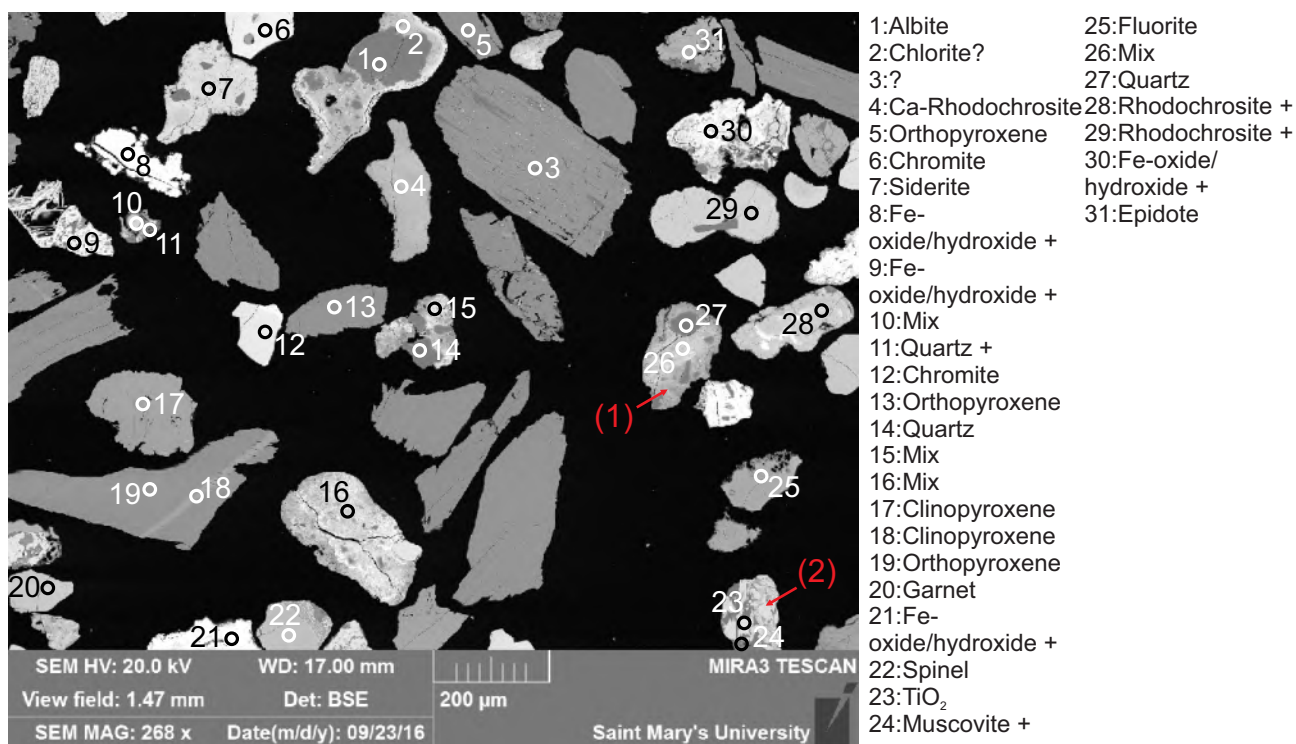

Figure B8.10: Sample S15 site 9 (SEM). 1: Siltstone lithic clast. 2: Lithic clast (titania + muscovite, metamorphic).

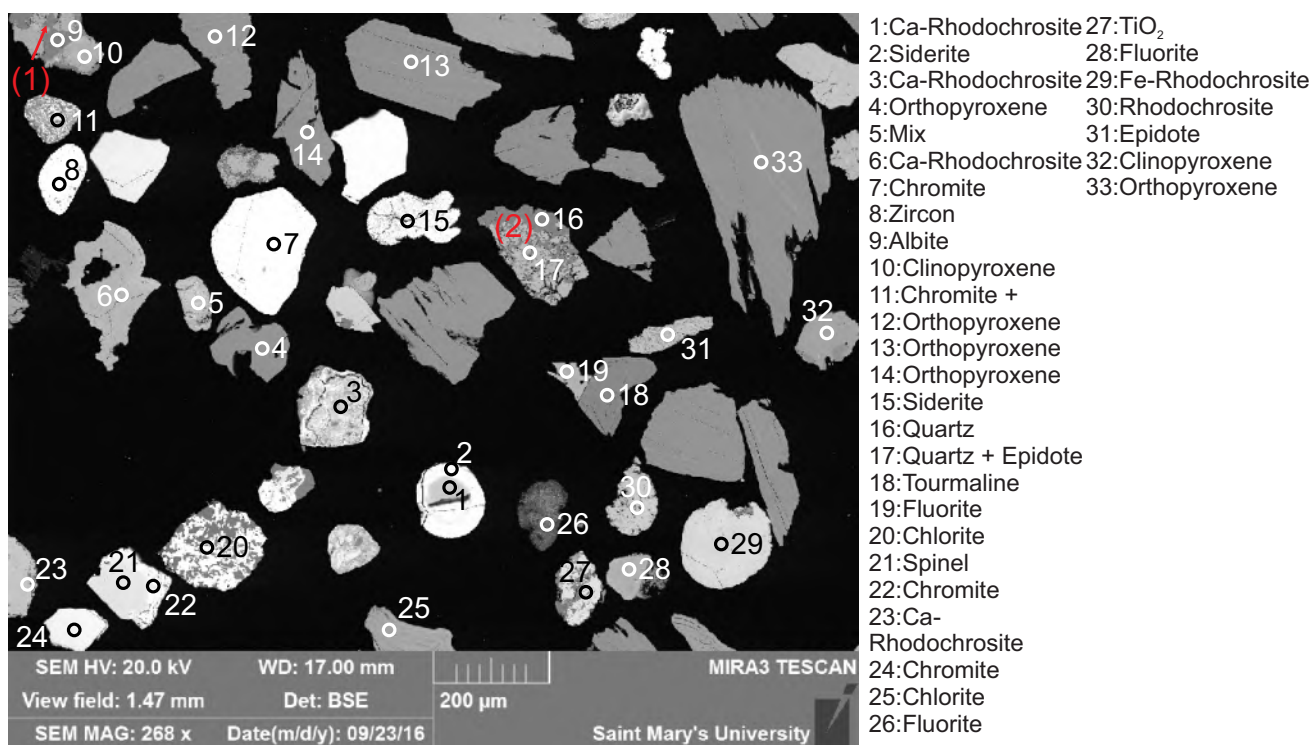

Figure B8.11: Sample S15 site 10 (SEM). 1: Lithic clast (albite + clinopyroxene, metaophiolite). 2: Lithic clast (epidote + quartz, hydrothermal vein).

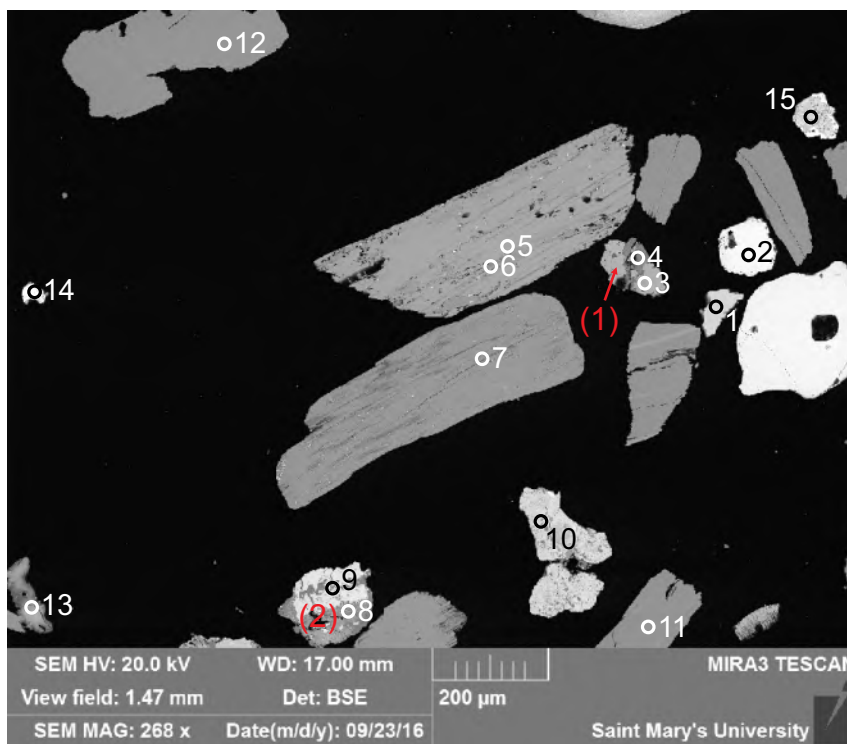

- 1: Garnet
- 2: Chromite
- 3: Epidote
- 4: Albite
- 5: Orthopyroxene
- 6: Amphibole
- 7: Amphibole
- 8: Quartz + TiO<sub>2</sub>
- 9: TiO<sub>2</sub> +
- 10: Siderite
- 11: Orthopyroxene
- 12: Orthopyroxene
- 13: Fluorite
- 14: Pyrite
- 15: Titanite

Figure B8.12: Sample S15 site 11 (SEM). 1: Lithic clast (albite + epidote, hydrothermal). 2: Lithic clast (quartz + titania, metamorphic).

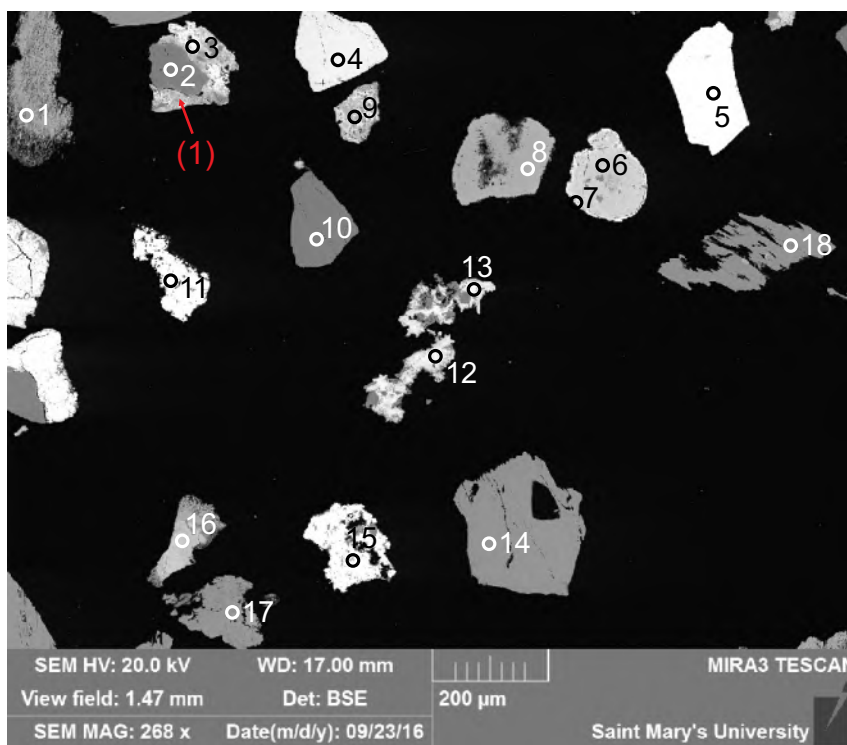

- 1: Fluorite
- 2: Quartz
- 3: Fe-oxide/hydroxide +
- 4: Chromite
- 5: Chromite
- 6: Rhodochrosite
- 7: Mix
- 8: Fluorite
- 9: Chlorite?
- 10: Quartz
- 11: Pyrite
- 12: Fe-oxide/hydroxide +
- 13: Fe-oxide/hydroxide +
- 14: Orthopyroxene
- 15: Pyrite
- 16: Ca-Rhodochrosite
- 17: Actinolite
- 18: Orthopyroxene

Figure B8.13: Sample S15 site 12 (SEM). 1: ?Sandstone lithic clast.

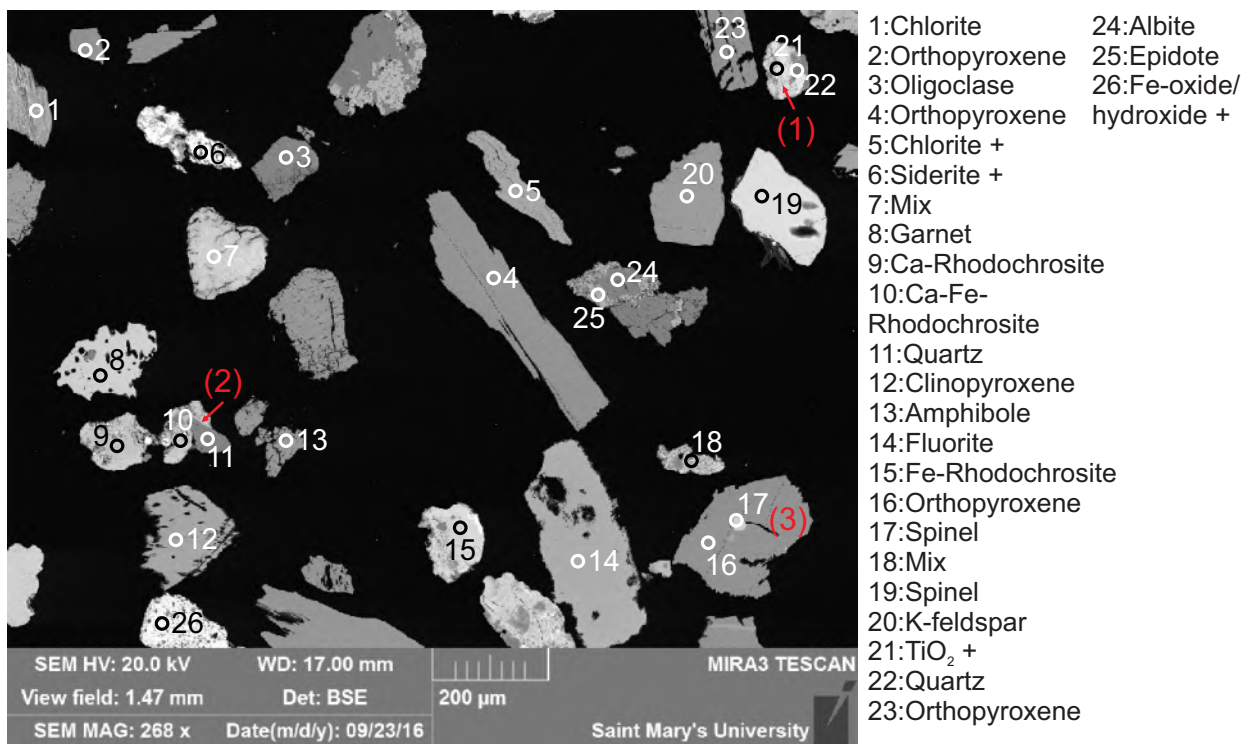

Figure B8.14: Sample S15 site 13 (SEM). 1: Lithic clast (quartz + titania, metamorphic). 2: Lithic clast (rhodochrosite + quartz, hydrothermal). 3: Lithic clast (spinel + orthopyroxene, ophiolite).

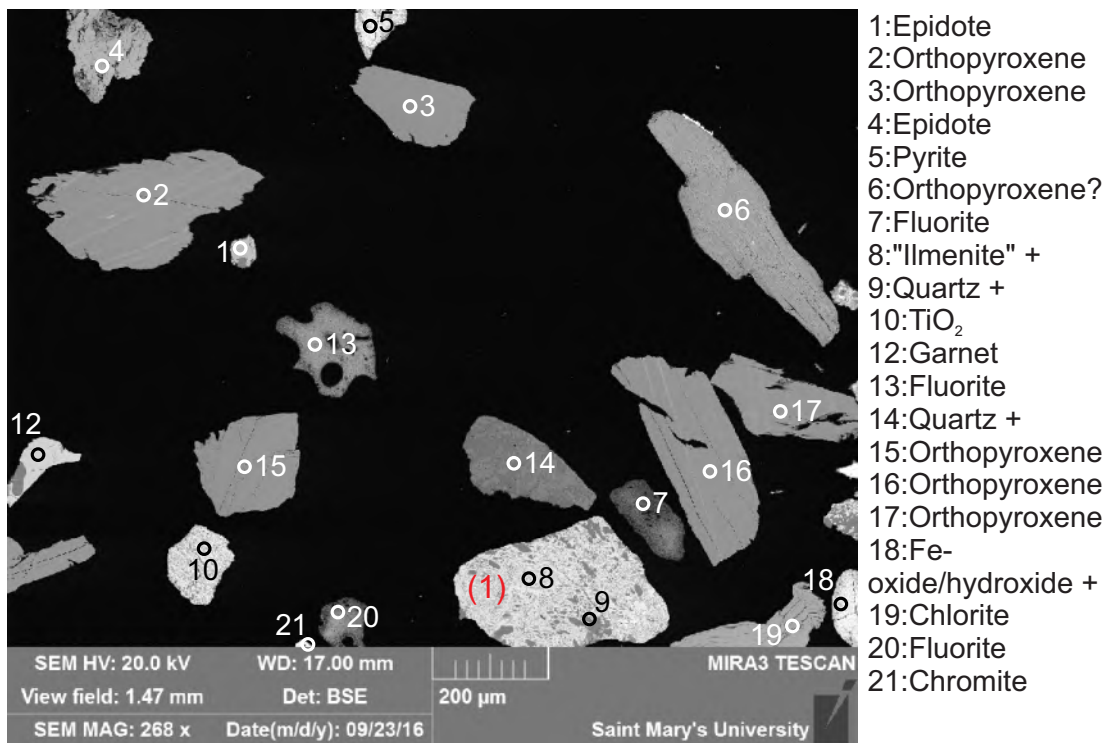

Figure B8.15: Sample S15 site 14 (SEM). 1: Lithic clast (altered ilmenite + quartz inclusions, metamorphic).



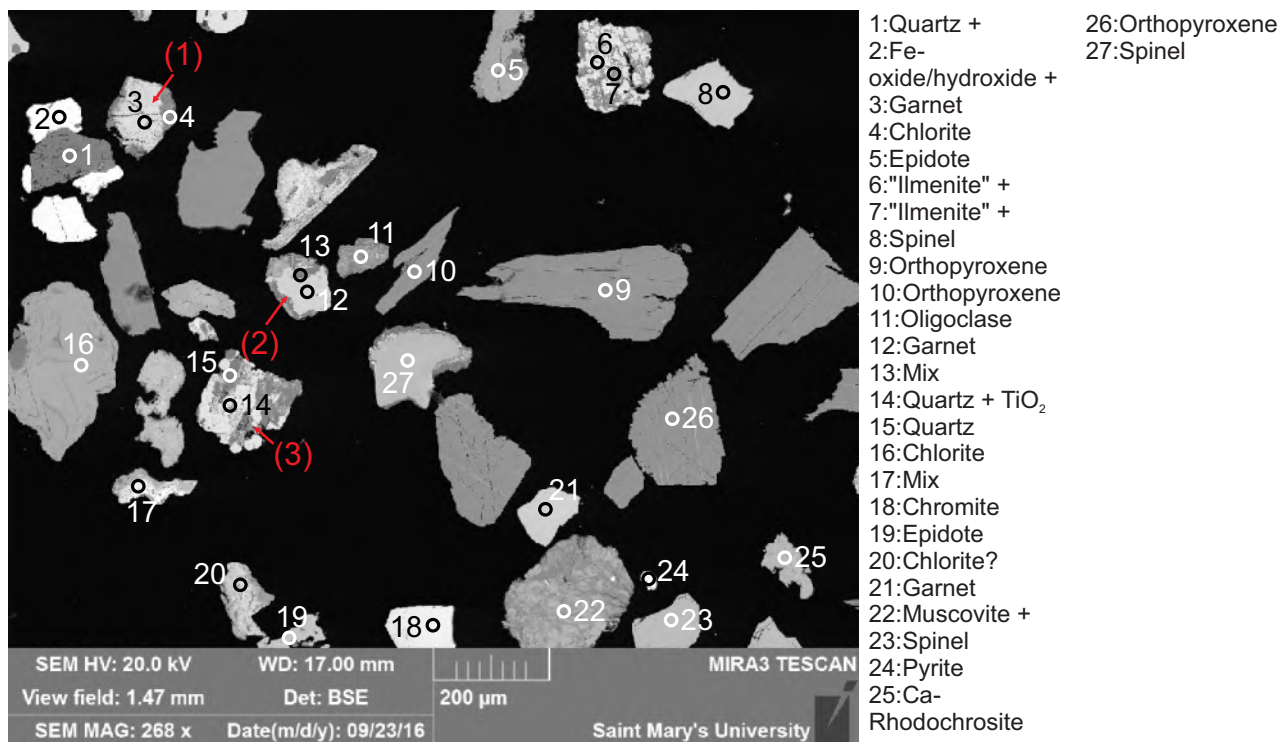

Figure B8.16: Sample S15 site 15 (SEM). 1: Lithic clast (garnet + chlorite, metamorphic). 2: Lithic clast (garnet + albite, metamorphic). 3: Lithic clast (titania + quartz, metamorphic).

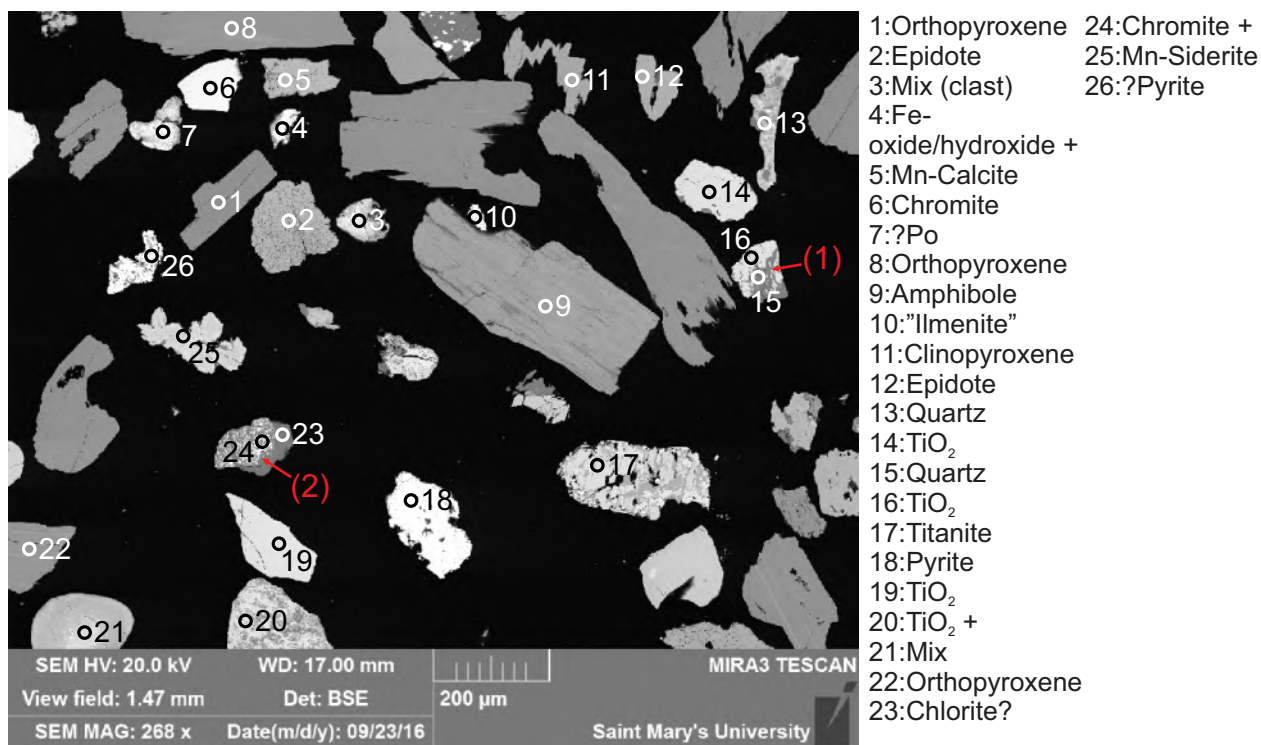

Figure B8.17: Sample S15 site 16 (SEM). 1: Lithic clast (titania + quartz, metamorphic). 2: Lithic clast (chlorite + chromite, metaophiolite).

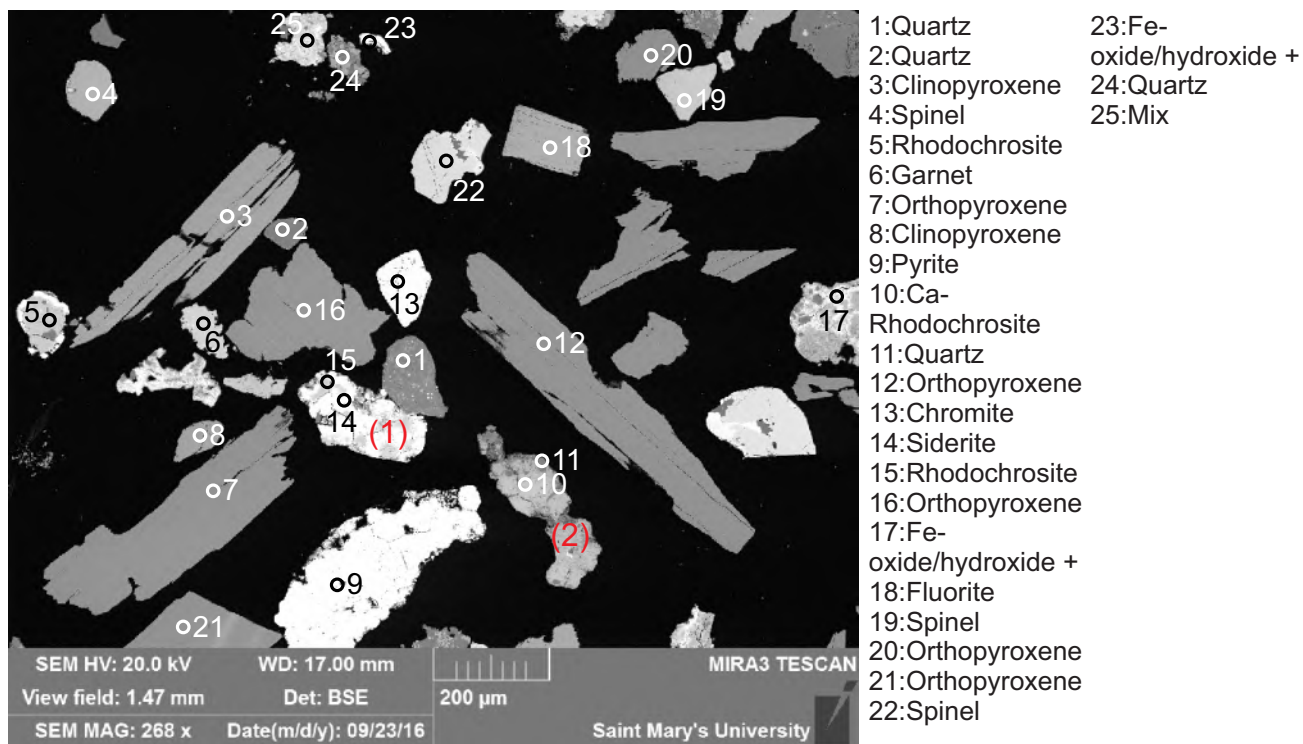

Figure B8.18: Sample S15 site 17 (SEM). 1: Lithic clast (rhodochrosite + siderite, hydrothermal). 2: Lithic clast (quartz + rhodochrosite, hydrothermal).

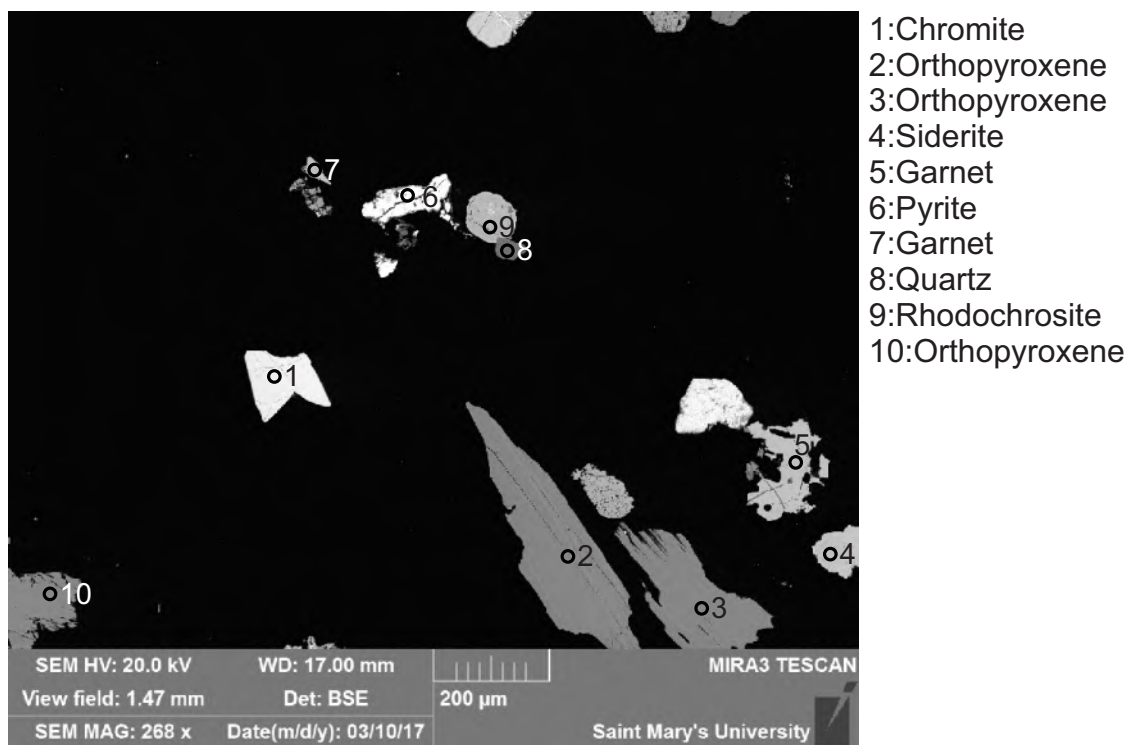

Figure B8.19: Sample S15 site 18 (SEM).



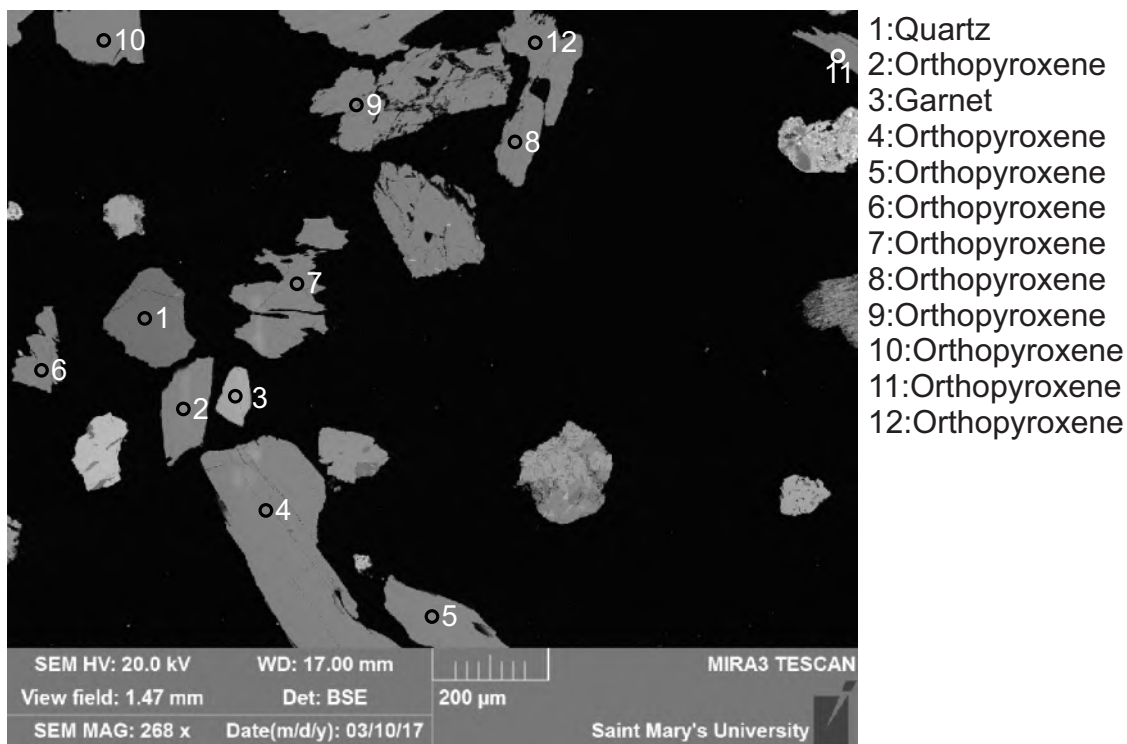

Figure B8.20: Sample S15 site 19 (SEM).

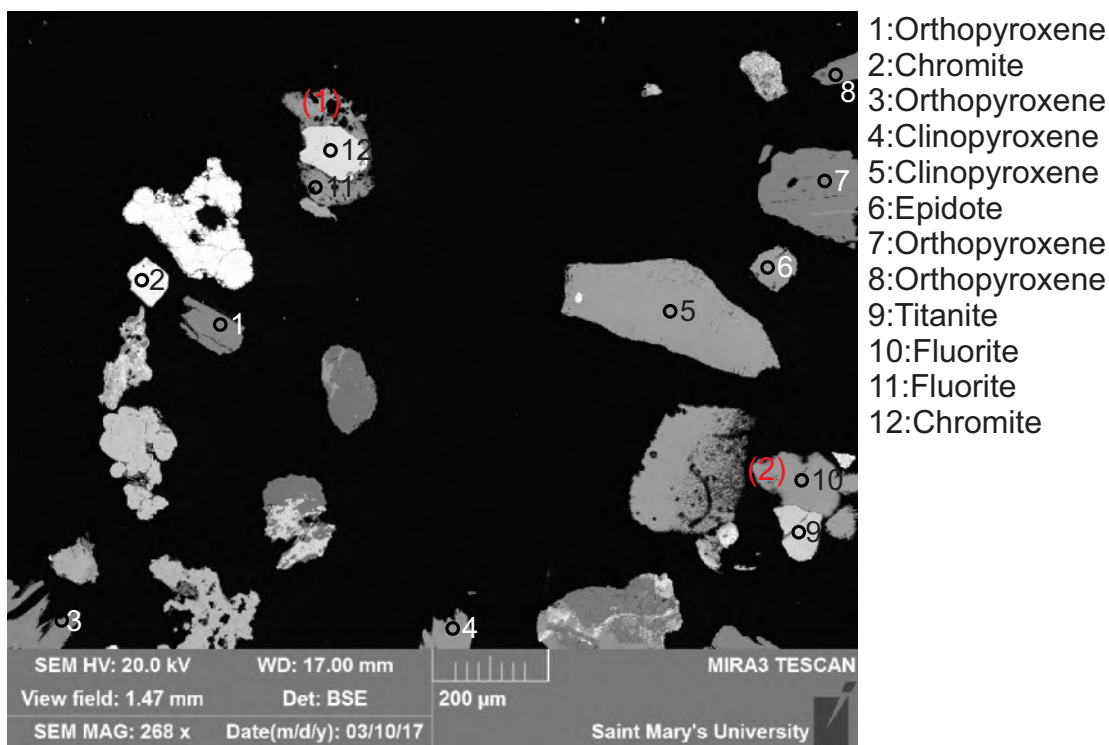

Figure B8.21: Sample S15 site 20 (SEM). 1: Lithic clast (fluorite + chromite, metaophiolite). 2: Lithic clast (titanite + fluorite, metamorphic).

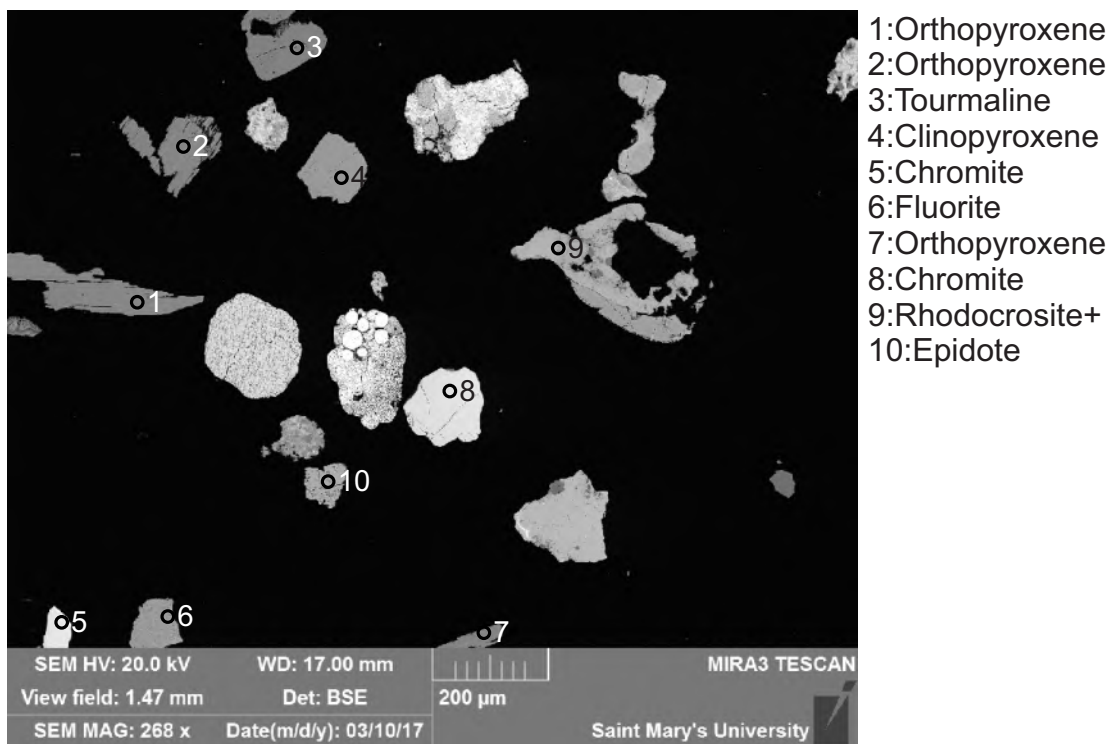

Figure B8.22: Sample S15 site 21 (SEM).

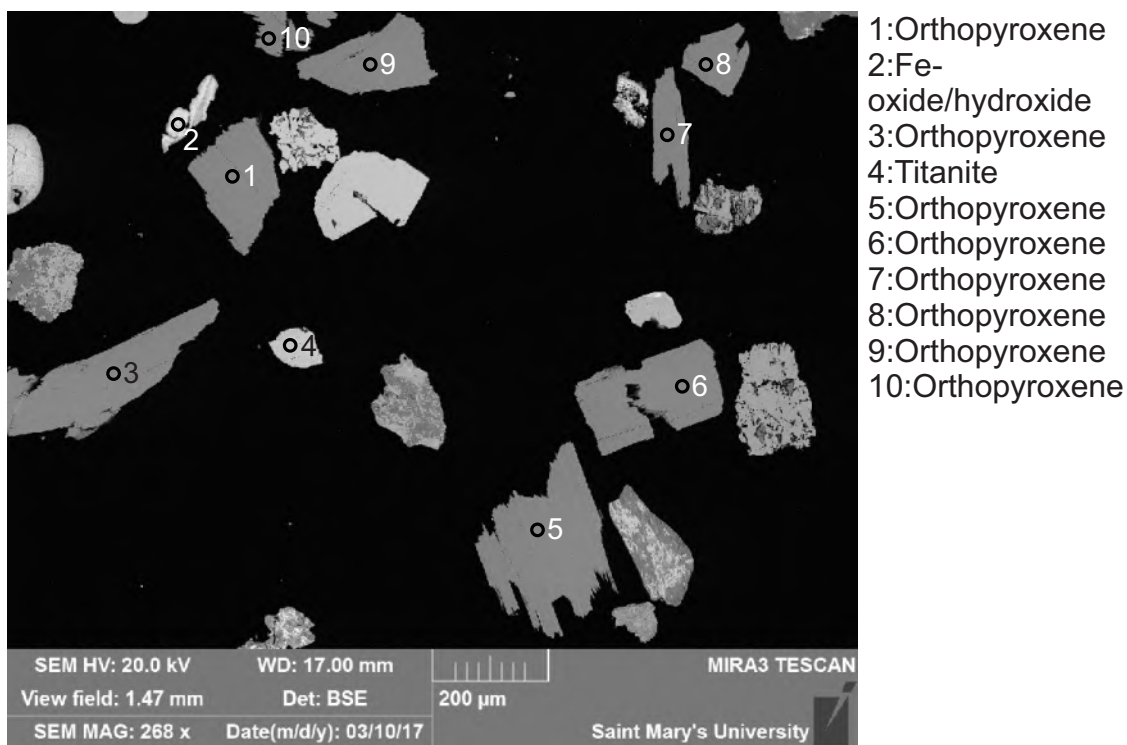

Figure B8.23: Sample S15 site 22 (SEM).

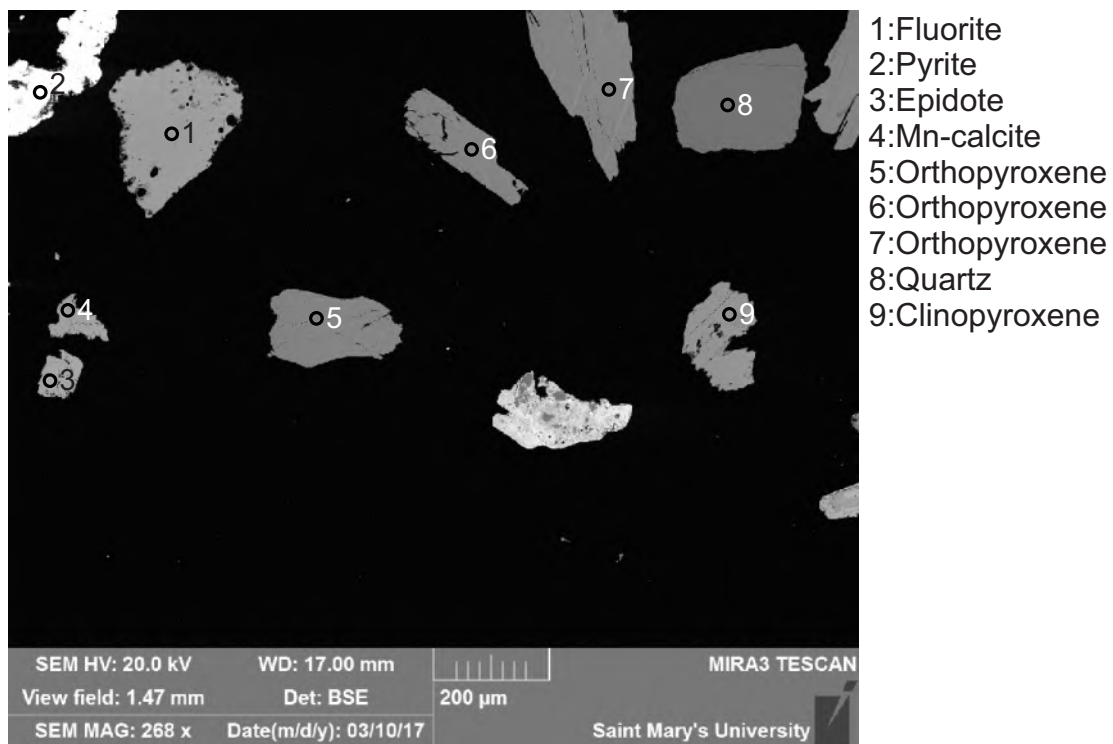

Figure B8.24: Sample S15 site 23 (SEM).

Table B8.1: EDS analyses of sample S15.

| Sample | Site | Position | Mineral | SiO2   | TiO2  | Al2O3 | FeO   | MnO   | MgO   | CaO   | Na2O | K2O  | P2O5 | SO3   | F    | Cl | V2O5 | Cr2O3 | NiO | ZnO  | As2O3 | SrO | ZrO2 | HfO2 | WO3   | PtO2 | Total | Actual Total |
|--------|------|----------|---------|--------|-------|-------|-------|-------|-------|-------|------|------|------|-------|------|----|------|-------|-----|------|-------|-----|------|------|-------|------|-------|--------------|
| S15    | 1    | 1        | Qz      | 100.00 |       |       |       |       |       |       |      |      |      |       |      |    |      |       |     |      |       |     |      |      |       |      | 100   | 119          |
| S15    | 1    | 2        | Py      |        |       |       | 29.14 |       |       |       | 0.26 |      |      | 70.59 |      |    |      |       |     |      |       |     |      |      |       |      | 100   | 208          |
| S15    | 1    | 3        | Opx     | 56.73  |       | 3.37  | 5.58  |       | 33.48 | 0.32  |      |      |      |       |      |    |      | 0.53  |     |      |       |     |      |      |       |      | 100   | 114          |
| S15    | 1    | 4        | Cpx     | 54.19  |       | 3.45  | 1.91  |       | 17.27 | 22.35 |      |      |      |       |      |    |      | 0.83  |     |      |       |     |      |      |       |      | 100   | 116          |
| S15    | 1    | 5        | Opx     | 56.23  |       | 3.73  | 5.73  |       | 33.34 | 0.32  |      |      |      |       |      |    |      | 0.64  |     |      |       |     |      |      |       |      | 100   | 117          |
| S15    | 1    | 6        | Chl +   | 20.22  | 0.37  | 11.67 | 44.40 | 0.53  | 1.05  | 0.41  | 0.60 | 0.81 |      |       |      |    |      |       |     |      |       |     |      |      | 4.95  |      | 85    | 86           |
| S15    | 1    | 7        | Qz      | 99.58  |       |       | 0.42  |       |       |       |      |      |      |       |      |    |      |       |     |      |       |     |      |      |       |      | 100   | 118          |
| S15    | 1    | 8        | Py      | 0.57   |       |       | 37.92 |       |       | 0.24  | 0.82 |      |      | 59.13 |      |    |      |       |     |      |       |     |      |      | 1.32  |      | 100   | 165          |
| S15    | 1    | 9        | Opx     | 56.58  |       | 3.45  | 5.36  |       | 33.45 | 0.43  |      |      |      |       |      |    |      | 0.72  |     |      |       |     |      |      |       |      | 100   | 111          |
| S15    | 1    | 10       | Mix     | 43.78  | 1.60  | 6.13  | 21.70 | 15.24 | 0.55  | 1.73  | 0.96 | 1.02 |      |       | 3.16 |    |      |       |     |      |       |     |      |      | 4.13  |      | 100   | 36           |
| S15    | 1    | 11       | Chl +   | 28.27  | 0.46  | 14.61 | 25.00 | 6.69  | 1.44  | 1.24  | 0.90 | 1.65 |      |       |      |    |      |       |     |      |       |     |      |      | 4.74  |      | 85    | 79           |
| S15    | 1    | 13       | Feohy + | 6.25   |       | 0.96  | 73.64 | 0.76  | 1.14  | 1.07  | 0.77 |      |      |       |      |    |      |       |     |      |       |     |      |      | 15.41 |      | 100   | 75           |
| S15    | 1    | 14       | Opx     | 56.81  |       | 2.81  | 5.42  |       | 33.63 | 0.83  |      |      |      |       |      |    |      | 0.50  |     |      |       |     |      |      |       |      | 100   | 114          |
| S15    | 1    | 15       | Ank +   | 2.36   |       | 1.18  | 3.37  | 16.14 | 3.91  | 23.41 |      |      |      |       | 5.63 |    |      |       |     |      |       |     |      |      |       |      | 56    | 68           |
| S15    | 1    | 16       | Qz +    | 93.94  |       | 3.50  | 1.07  |       | 0.76  |       |      | 0.74 |      |       |      |    |      |       |     |      |       |     |      |      |       |      | 100   | 114          |
| S15    | 1    | 17       | Spl     |        |       | 47.33 | 13.71 |       | 17.98 |       |      |      |      |       |      |    |      | 20.98 |     |      |       |     |      |      |       |      | 100   | 111          |
| S15    | 1    | 18       | Rds     | 0.46   |       |       | 2.01  | 47.31 |       | 6.21  |      |      |      |       |      |    |      |       |     |      |       |     |      |      |       |      | 56    | 61           |
| S15    | 1    | 19       | Mix     | 31.85  | 4.43  | 18.28 | 25.35 | 0.45  | 15.94 | 3.70  |      |      |      |       |      |    |      |       |     |      |       |     |      |      |       |      | 100   | 102          |
| S15    | 1    | 20       | Ttn     | 32.64  | 32.97 | 3.50  | 0.51  |       |       | 27.84 |      |      |      |       | 2.53 |    |      |       |     |      |       |     |      |      |       |      | 100   | 115          |
| S15    | 1    | 21       | Opx     | 56.46  |       | 3.15  | 5.80  |       | 33.73 | 0.32  |      |      |      |       |      |    |      | 0.52  |     |      |       |     |      |      |       |      | 100   | 120          |
| S15    | 1    | 22       | Mnohy   |        |       |       | 8.21  | 64.92 | 1.46  | 19.45 |      |      |      |       | 5.96 |    |      |       |     |      |       |     |      |      |       |      | 100   | 62           |
| S15    | 1    | 23       | Spl     |        |       | 39.15 | 19.69 |       | 15.17 |       |      |      |      |       |      |    |      | 25.99 |     |      |       |     |      |      |       |      | 100   | 108          |
| S15    | 1    | 24       | Spl +   | 6.17   |       | 25.82 | 26.50 | 0.72  | 11.09 |       |      |      |      |       |      |    |      | 28.34 |     | 1.37 |       |     |      |      |       |      | 100   | 103          |
| S15    | 1    | 25       | Mix     | 20.31  |       | 12.65 | 48.58 | 3.16  | 2.31  | 7.37  |      | 2.24 |      |       |      |    |      |       |     |      |       |     |      |      | 3.38  |      | 100   | 82           |
| S15    | 1    | 26       | Qz      | 99.77  |       |       | 0.23  |       |       |       |      |      |      |       |      |    |      |       |     |      |       |     |      |      |       |      | 100   | 120          |
| S15    | 1    | 28       | TiO2    | 0.88   | 95.93 | 0.39  | 2.40  |       |       | 0.40  |      |      |      |       |      |    |      |       |     |      |       |     |      |      |       |      | 100   | 107          |
| S15    | 1    | 29       | Opx     | 56.66  |       | 2.91  | 5.38  |       | 33.86 | 0.41  |      |      |      |       |      |    |      | 0.79  |     |      |       |     |      |      |       |      | 100   | 123          |
| S15    | 1    | 30       | Qz      | 98.81  |       | 0.55  | 0.30  |       |       | 0.34  |      |      |      |       |      |    |      |       |     |      |       |     |      |      |       |      | 100   | 125          |
| S15    | 1    | 31       | Ep      | 42.94  |       | 21.85 | 11.22 |       |       | 20.98 |      |      |      |       |      |    |      |       |     |      |       |     |      |      |       |      | 97    | 111          |
| S15    | 1    | 32       | Spl     |        |       | 48.16 | 12.75 |       | 17.96 |       |      |      |      |       |      |    |      | 21.12 |     |      |       |     |      |      |       |      | 100   | 110          |
| S15    | 1    | 33       | Fe-Rds  |        |       |       | 21.03 | 26.57 | 0.57  | 7.82  |      |      |      |       |      |    |      |       |     |      |       |     |      |      |       |      | 56    | 57           |
| S15    | 1    | 34       | Opx     | 57.75  |       | 1.72  | 5.17  |       | 34.31 | 0.37  |      |      |      |       |      |    |      | 0.68  |     |      |       |     |      |      |       |      | 100   | 116          |
| S15    | 1    | 35       | Opx     | 56.03  |       | 3.23  | 5.11  |       | 32.05 | 3.02  |      |      |      |       |      |    |      | 0.56  |     |      |       |     |      |      |       |      | 100   | 115          |
| S15    | 1    | 36       | Opx     | 56.42  |       | 4.03  | 5.15  |       | 32.49 | 1.22  |      |      |      |       |      |    |      | 0.70  |     |      |       |     |      |      |       |      | 100   | 117          |
| S15    | 1    | 37       | Qz      | 100.00 |       |       |       |       |       |       |      |      |      |       |      |    |      |       |     |      |       |     |      |      |       |      | 100   | 119          |
| S15    | 1    | 38       | "Ilm"   | 18.53  | 57.51 |       | 8.66  | 0.97  |       | 14.33 |      |      |      |       |      |    |      |       |     |      |       |     |      |      |       |      | 100   | 105          |
| S15    | 1    | 39       | Mix     | 28.69  | 0.74  | 19.50 | 38.17 |       | 1.34  | 1.09  |      | 1.18 | 1.32 |       |      |    |      |       |     |      |       |     |      |      | 7.96  |      | 100   | 90           |
| S15    | 1    | 40       | Mn-Sd?  | 0.67   |       |       | 25.09 | 21.75 | 0.96  | 7.54  |      |      |      |       |      |    |      |       |     |      |       |     |      |      |       |      | 56    | 57           |
| S15    | 1    | 41       | Cal     |        |       |       | 1.14  | 11.84 | 2.04  | 36.36 |      |      |      |       | 4.63 |    |      |       |     |      |       |     |      |      |       |      | 56    | 64           |
| S15    | 1    | 42       | Py      | 0.35   |       |       | 31.44 | 8.38  | 0.48  | 3.52  |      |      |      | 55.83 |      |    |      |       |     |      |       |     |      |      |       |      | 100   | 139          |
| S15    | 2    | 1        | Qz      | 99.38  |       | 0.36  |       |       |       |       | 0.27 |      |      |       |      |    |      |       |     |      |       |     |      |      |       |      | 100   | 121          |
| S15    | 2    | 2        | Ep      | 39.96  |       | 23.52 | 11.45 | 0.33  |       | 21.74 |      |      |      |       |      |    |      |       |     |      |       |     |      |      |       |      | 97    | 109          |
| S15    | 2    | 3        | Ep      | 40.41  |       | 23.68 | 10.37 |       |       | 22.54 |      |      |      |       |      |    |      |       |     |      |       |     |      |      |       |      | 97    | 111          |
| S15    | 2    | 4        | Ep      | 36.88  |       | 21.16 | 17.75 |       |       | 20.84 |      |      |      |       |      |    | 0.38 |       |     |      |       |     |      |      |       |      | 97    | 105          |

Table B8.1: EDS analyses of sample S15.

| Sample | Site | Position | Mineral   | SiO2   | TiO2  | Al2O3 | FeO   | MnO  | MgO   | CaO   | Na2O  | K2O  | P2O5 | SO3  | F     | Cl | V2O5 | Cr2O3 | NiO | ZnO | As2O3 | SrO | ZrO2 | HfO2 | WO3   | PtO2 | Total | Actual Total |
|--------|------|----------|-----------|--------|-------|-------|-------|------|-------|-------|-------|------|------|------|-------|----|------|-------|-----|-----|-------|-----|------|------|-------|------|-------|--------------|
| S15    | 3    | 1        | TiO2 +    | 15.93  | 81.98 | 1.09  | 0.78  |      |       | 0.22  |       |      |      |      |       |    |      |       |     |     |       |     |      |      |       | 100  | 109   |              |
| S15    | 3    | 2        | Opx       | 56.70  |       | 2.87  | 6.31  |      | 33.15 | 0.31  |       |      |      |      |       |    |      | 0.66  |     |     |       |     |      |      |       | 100  | 110   |              |
| S15    | 3    | 3        | Opx       | 56.41  |       | 3.58  | 5.61  |      | 33.42 | 0.38  |       |      |      |      |       |    |      | 0.60  |     |     |       |     |      |      |       | 100  | 111   |              |
| S15    | 3    | 4        | Fl        |        |       |       |       |      |       | 55.28 | 0.51  |      |      |      | 44.21 |    |      |       |     |     |       |     |      |      |       | 100  | 106   |              |
| S15    | 3    | 5        | Ep        | 40.64  |       | 26.56 | 6.69  |      |       | 23.11 |       |      |      |      |       |    |      |       |     |     |       |     |      |      |       | 97   | 108   |              |
| S15    | 3    | 6        | Fl        |        |       |       |       |      |       | 49.48 | 0.58  |      |      |      | 49.94 |    |      |       |     |     |       |     |      |      |       | 100  | 127   |              |
| S15    | 3    | 7        | Ep        | 39.81  |       | 20.09 | 14.67 |      |       | 22.44 |       |      |      |      |       |    |      |       |     |     |       |     |      |      |       | 97   | 113   |              |
| S15    | 3    | 8        | Feohy +   | 4.63   |       |       | 81.03 | 0.36 | 0.52  |       |       |      |      | 7.60 |       |    |      |       |     |     |       |     |      |      | 5.86  | 100  | 88    |              |
| S15    | 3    | 9        | Qz        | 99.74  |       |       | 0.26  |      |       |       |       |      |      |      |       |    |      |       |     |     |       |     |      |      |       | 100  | 121   |              |
| S15    | 3    | 10       | Opx       | 58.35  |       | 1.75  | 4.67  |      | 34.34 | 0.54  |       |      |      |      |       |    |      | 0.35  |     |     |       |     |      |      |       | 100  | 96    |              |
| S15    | 3    | 11       | Feohy +   | 9.90   |       | 7.23  | 71.99 | 0.92 | 1.32  | 0.88  |       | 0.35 | 1.37 |      |       |    |      |       |     |     |       |     |      |      | 6.03  | 100  | 80    |              |
| S15    | 3    | 12       | Ms + TiO2 | 48.01  | 4.39  | 34.99 | 0.98  |      |       |       | 1.69  | 8.34 |      |      | 1.61  |    |      |       |     |     |       |     |      |      |       | 100  | 110   |              |
| S15    | 3    | 13       | TiO2 +    | 16.36  | 72.11 | 9.89  | 0.86  |      | 0.43  |       |       | 0.35 |      |      |       |    |      |       |     |     |       |     |      |      |       | 100  | 104   |              |
| S15    | 3    | 14       | Fl        |        |       |       |       |      |       | 63.98 | 0.81  |      |      |      | 35.21 |    |      |       |     |     |       |     |      |      |       | 100  | 82    |              |
| S15    | 3    | 15       | Feohy +   | 18.28  |       | 13.31 | 57.72 | 0.56 | 1.06  | 0.73  | 0.78  | 2.44 |      |      |       |    |      |       |     |     |       |     |      |      | 5.13  | 100  | 81    |              |
| S15    | 3    | 16       | Olig      | 64.40  |       | 22.11 | 0.34  |      |       | 3.57  | 9.57  |      |      |      |       |    |      |       |     |     |       |     |      |      |       | 100  | 116   |              |
| S15    | 3    | 17       | Olig      | 65.45  |       | 21.62 |       |      |       | 3.06  | 9.67  | 0.20 |      |      |       |    |      |       |     |     |       |     |      |      |       | 100  | 116   |              |
| S15    | 3    | 18       | Feohy +   | 7.02   |       | 5.42  | 73.98 | 0.86 | 1.51  | 0.87  |       | 0.45 | 1.67 |      |       |    |      |       |     |     |       |     |      |      | 8.21  | 100  | 82    |              |
| S15    | 3    | 19       | Qz        | 99.45  |       |       | 0.55  |      |       |       |       |      |      |      |       |    |      |       |     |     |       |     |      |      |       | 100  | 122   |              |
| S15    | 3    | 20       | Qz +      | 92.07  |       | 1.85  | 6.08  |      |       |       |       |      |      |      |       |    |      |       |     |     |       |     |      |      |       | 100  | 111   |              |
| S15    | 3    | 21       | Feohy +   | 4.77   |       | 1.28  | 81.45 | 1.15 | 0.59  | 0.86  |       |      |      |      |       |    |      |       |     |     |       |     |      |      | 9.92  | 100  | 77    |              |
| S15    | 3    | 22       | TiO2 +    | 6.24   | 83.25 | 3.84  | 6.07  |      | 0.60  |       |       |      |      |      |       |    |      |       |     |     |       |     |      |      |       | 100  | 96    |              |
| S15    | 3    | 23       | Opx       | 56.84  |       | 3.09  | 5.60  |      | 33.53 | 0.34  |       |      |      |      |       |    |      | 0.59  |     |     |       |     |      |      |       | 100  | 112   |              |
| S15    | 4    | 1        | Chl       | 30.33  |       | 15.18 | 21.99 | 0.38 | 14.81 | 0.33  | 0.50  | 0.51 |      | 0.96 |       |    |      |       |     |     |       |     |      |      |       | 85   | 97    |              |
| S15    | 4    | 2        | Ttn       | 35.03  | 25.90 | 6.61  | 3.15  |      | 0.58  | 26.77 |       |      |      |      |       |    | 0.66 |       |     |     |       |     |      |      | 1.31  | 100  | 106   |              |
| S15    | 4    | 3        | Mix       | 51.82  | 0.72  | 17.76 | 20.12 | 2.63 | 1.24  | 0.49  | 0.72  | 1.63 |      |      |       |    |      |       |     |     |       |     |      |      | 2.88  | 100  | 108   |              |
| S15    | 4    | 4        | Qz        | 100.00 |       |       |       |      |       |       |       |      |      |      |       |    |      |       |     |     |       |     |      |      |       | 100  | 121   |              |
| S15    | 4    | 5        | Opx       | 55.56  |       | 4.55  | 5.58  |      | 33.12 | 0.33  |       |      |      |      |       |    |      | 0.86  |     |     |       |     |      |      |       | 100  | 119   |              |
| S15    | 4    | 6        | Opx       | 55.51  |       | 4.45  | 5.50  |      | 33.23 | 0.41  |       |      |      |      |       |    |      | 0.90  |     |     |       |     |      |      |       | 100  | 118   |              |
| S15    | 4    | 7        | ?Opx      | 60.52  |       | 1.34  | 2.99  |      | 24.98 | 10.17 |       |      |      |      |       |    |      |       |     |     |       |     |      |      |       | 100  | 115   |              |
| S15    | 4    | 8        | Qz        | 100.00 |       |       |       |      |       |       |       |      |      |      |       |    |      |       |     |     |       |     |      |      |       | 100  | 118   |              |
| S15    | 4    | 9        | Qz +      | 90.69  | 1.71  | 2.99  |       |      | 0.36  | 2.07  |       | 1.54 | 0.65 |      |       |    |      |       |     |     |       |     |      |      |       | 100  | 110   |              |
| S15    | 4    | 10       | Opx       | 56.62  |       | 3.51  | 5.37  |      | 32.96 | 0.75  |       |      |      |      |       |    |      | 0.78  |     |     |       |     |      |      |       | 100  | 117   |              |
| S15    | 4    | 11       | Feohy +   | 2.22   |       | 0.97  | 75.93 | 6.14 | 2.26  | 1.03  |       |      |      |      |       |    |      |       |     |     |       |     |      |      | 11.43 | 100  | 76    |              |
| S15    | 4    | 12       | Mix       | 61.09  |       |       | 2.26  |      | 24.15 | 12.50 |       |      |      |      |       |    |      |       |     |     |       |     |      |      |       | 100  | 111   |              |
| S15    | 4    | 13       | Ep        | 39.88  |       | 22.58 | 12.12 |      |       | 22.43 |       |      |      |      |       |    |      |       |     |     |       |     |      |      |       | 97   | 114   |              |
| S15    | 4    | 14       | Qz        | 97.80  |       |       | 0.26  |      |       |       |       |      |      |      |       |    |      |       |     |     |       |     |      |      |       | 100  | 124   |              |
| S15    | 4    | 15       | Ep        | 39.61  |       | 21.66 | 12.88 |      |       | 22.85 |       |      |      |      |       |    |      |       |     |     |       |     |      |      |       | 97   | 112   |              |
| S15    | 4    | 16       | Opx       | 57.06  |       | 2.63  | 5.69  |      | 33.79 | 0.32  |       |      |      |      |       |    |      | 0.52  |     |     |       |     |      |      |       | 100  | 122   |              |
| S15    | 4    | 17       | Opx       | 56.36  |       | 3.50  | 5.49  |      | 32.94 | 1.00  |       |      |      |      |       |    |      | 0.72  |     |     |       |     |      |      |       | 100  | 116   |              |
| S15    | 4    | 18       | Grt       | 38.64  |       | 21.04 | 32.10 | 4.78 | 2.26  | 1.19  |       |      |      |      |       |    |      |       |     |     |       |     |      |      |       | 100  | 111   |              |
| S15    | 4    | 19       | Ep        | 40.47  |       | 26.03 | 7.41  |      | 1.66  | 21.43 |       |      |      |      |       |    |      |       |     |     |       |     |      |      |       | 97   | 105   |              |
| S15    | 4    | 20       | Ab        | 68.05  |       | 18.79 |       |      |       | 0.45  | 10.07 | 2.64 |      |      |       |    |      |       |     |     |       |     |      |      |       | 100  | 116   |              |
| S15    | 4    | 21       | Opx       | 56.73  |       | 3.15  | 5.57  |      | 33.65 | 0.25  |       |      |      |      |       |    |      | 0.66  |     |     |       |     |      |      |       | 100  | 116   |              |



Table B8.1: EDS analyses of sample S15.

| Sample | Site | Position | Mineral | SiO2   | TiO2  | Al2O3 | FeO   | MnO   | MgO   | CaO   | Na2O | K2O  | P2O5  | SO3  | F    | Cl   | V2O5 | Cr2O3 | NiO | ZnO | As2O3 | SrO | ZrO2 | HfO2 | WO3   | PtO2 | Total | Actual Total |
|--------|------|----------|---------|--------|-------|-------|-------|-------|-------|-------|------|------|-------|------|------|------|------|-------|-----|-----|-------|-----|------|------|-------|------|-------|--------------|
| S15    | 4    | 22       | Chl?    | 24.77  |       | 14.45 | 35.07 | 1.04  | 1.69  | 0.95  |      | 0.95 |       |      |      |      |      |       |     |     |       |     |      |      | 6.07  |      | 85    | 80           |
| S15    | 4    | 23       | Opx     | 56.95  |       | 3.16  | 5.38  |       | 32.78 | 1.11  |      |      |       |      |      |      |      | 0.62  |     |     |       |     |      |      |       |      | 100   | 114          |
| S15    | 4    | 24       | Rds     |        |       |       | 0.83  | 36.84 | 1.11  | 12.02 |      |      |       |      | 5.20 |      |      |       |     |     |       |     |      |      |       |      | 56    | 64           |
| S15    | 4    | 25       | Sd +    | 3.74   |       | 1.43  | 35.04 | 1.87  | 0.41  | 1.54  | 0.88 | 0.20 | 1.10  |      |      |      |      |       |     |     |       |     |      |      | 9.79  |      | 56    | 84           |
| S15    | 4    | 26       | Cpx     | 55.04  |       | 2.39  | 1.83  |       | 17.39 | 22.94 |      |      |       |      |      |      |      | 0.41  |     |     |       |     |      |      |       |      | 100   | 110          |
| S15    | 4    | 27       | Opx     | 56.36  |       | 3.76  | 5.77  |       | 33.11 | 0.36  |      |      |       |      |      |      |      | 0.64  |     |     |       |     |      |      |       |      | 100   | 110          |
| S15    | 4    | 28       | Opx     | 56.44  |       | 3.50  | 5.34  |       | 33.51 | 0.44  |      |      |       |      |      |      |      | 0.77  |     |     |       |     |      |      |       |      | 100   | 118          |
| S15    | 4    | 29       | Chl +   | 27.56  |       | 13.35 | 30.65 | 0.31  | 0.99  | 0.77  | 0.36 | 0.82 | 1.41  |      |      |      |      |       |     |     |       |     |      |      | 8.80  |      | 85    | 94           |
| S15    | 5    | 1        | Opx     | 55.26  |       | 3.44  | 7.57  |       | 30.31 | 2.49  |      |      |       |      |      |      |      | 0.93  |     |     |       |     |      |      |       |      | 100   | 77           |
| S15    | 5    | 2        | Opx     | 58.34  |       | 0.99  | 4.92  |       | 34.97 | 0.35  |      |      |       |      |      |      |      | 0.43  |     |     |       |     |      |      |       |      | 100   | 112          |
| S15    | 5    | 3        | Grt     | 37.73  |       | 2.67  | 25.22 |       |       | 34.38 |      |      |       |      |      |      |      |       |     |     |       |     |      |      |       |      | 100   | 91           |
| S15    | 5    | 4        | Grt     | 38.35  |       | 3.17  | 24.94 |       | 0.45  | 33.08 |      |      |       |      |      |      |      |       |     |     |       |     |      |      |       |      | 100   | 84           |
| S15    | 5    | 5        | Opx     | 55.68  |       | 3.96  | 5.59  |       | 33.39 | 0.72  |      |      |       |      |      |      |      | 0.67  |     |     |       |     |      |      |       |      | 100   | 113          |
| S15    | 5    | 6        | TiO2 +  | 2.24   | 96.48 | 0.71  | 0.31  |       |       |       |      | 0.27 |       |      |      |      |      |       |     |     |       |     |      |      |       |      | 100   | 105          |
| S15    | 5    | 7        | Ms      | 51.71  | 0.62  | 30.21 | 1.77  |       | 0.87  |       | 0.95 | 8.87 |       |      |      |      |      |       |     |     |       |     |      |      |       |      | 95    | 112          |
| S15    | 5    | 8        | Feohy + | 2.52   |       |       | 72.34 | 0.48  |       | 1.34  | 1.55 |      |       | 3.45 |      |      |      |       |     |     | 2.92  |     |      |      | 15.39 |      | 100   | 75           |
| S15    | 5    | 9        | Tur     | 38.52  | 0.43  | 32.30 | 7.60  |       | 6.00  |       | 2.15 |      |       |      |      |      |      |       |     |     |       |     |      |      |       |      | 87    | 95           |
| S15    | 5    | 10       | Grt     | 38.97  |       | 20.91 | 34.00 | 0.37  | 1.73  | 4.03  |      |      |       |      |      |      |      |       |     |     |       |     |      |      |       |      | 100   | 108          |
| S15    | 5    | 11       | Ilm     |        | 50.39 |       | 49.61 |       |       |       |      |      |       |      |      |      |      |       |     |     |       |     |      |      |       |      | 100   | 100          |
| S15    | 5    | 12       | "Ttn" + | 24.10  | 53.37 | 2.76  | 1.25  |       |       | 18.52 |      |      |       |      |      |      |      |       |     |     |       |     |      |      |       |      | 100   | 108          |
| S15    | 5    | 13       | Ap +    | 2.09   |       |       |       |       |       | 50.11 |      |      | 39.40 |      | 5.16 | 1.41 |      |       |     |     |       |     |      |      | 1.82  |      | 100   | 37           |
| S15    | 5    | 14       | Chr     |        |       | 11.66 | 21.07 |       | 9.72  |       |      |      |       |      |      |      |      | 57.55 |     |     |       |     |      |      |       |      | 100   | 107          |
| S15    | 5    | 15       | Chr     |        |       | 24.29 | 16.32 |       | 13.70 |       |      |      |       |      |      |      |      | 45.70 |     |     |       |     |      |      |       |      | 100   | 107          |
| S15    | 5    | 16       | Qz      | 99.06  |       | 0.42  | 0.20  |       |       |       | 0.33 |      |       |      |      |      |      |       |     |     |       |     |      |      |       |      | 100   | 118          |
| S15    | 5    | 17       | Mix     | 12.28  |       | 5.69  | 31.14 | 31.48 | 2.34  | 13.70 |      | 0.48 |       |      |      |      |      |       |     |     |       |     |      |      | 2.89  |      | 100   | 62           |
| S15    | 5    | 18       | Mn-Sd   |        |       |       | 29.59 | 20.69 | 1.19  | 4.52  |      |      |       |      |      |      |      |       |     |     |       |     |      |      |       |      | 56    | 58           |
| S15    | 5    | 19       | Opx     | 56.59  |       | 3.58  | 5.83  |       | 32.98 | 0.35  |      |      |       |      |      |      |      | 0.67  |     |     |       |     |      |      |       |      | 100   | 113          |
| S15    | 5    | 20       | Cpx     | 54.89  |       | 2.54  | 1.84  |       | 17.64 | 22.39 |      |      |       |      |      |      |      | 0.70  |     |     |       |     |      |      |       |      | 100   | 118          |
| S15    | 5    | 21       | Cpx     | 53.58  | 0.80  | 2.11  | 8.36  |       | 15.01 | 19.69 | 0.45 |      |       |      |      |      |      |       |     |     |       |     |      |      |       |      | 100   | 117          |
| S15    | 5    | 22       | Opx     | 56.24  |       | 3.43  | 5.45  |       | 33.28 | 1.00  |      |      |       |      |      |      |      | 0.59  |     |     |       |     |      |      |       |      | 100   | 118          |
| S15    | 5    | 23       | Py      |        |       |       | 29.09 |       |       |       |      |      | 70.27 |      |      |      |      |       |     |     | 0.64  |     |      |      |       |      | 100   | 204          |
| S15    | 5    | 24       | Chr     |        |       | 11.32 | 17.96 |       | 10.59 |       |      |      |       |      |      |      |      | 60.13 |     |     |       |     |      |      |       |      | 100   | 109          |
| S15    | 5    | 25       | Mix     | 43.92  |       | 5.51  | 41.85 |       | 1.33  | 0.95  | 0.78 | 0.66 |       | 0.82 |      |      |      |       |     |     |       |     |      |      | 4.18  |      | 100   | 91           |
| S15    | 5    | 26       | Mix     | 4.25   |       | 1.77  | 65.21 | 0.93  | 1.23  | 7.93  | 1.12 |      |       |      |      |      |      |       |     |     |       |     |      |      | 17.57 |      | 100   | 73           |
| S15    | 5    | 27       | Ep ?    | 44.09  |       | 20.26 | 11.89 |       |       | 18.04 | 2.72 |      |       |      |      |      |      |       |     |     |       |     |      |      |       |      | 97    | 116          |
| S15    | 5    | 28       | Qz      | 100.00 |       |       |       |       |       |       |      |      |       |      |      |      |      |       |     |     |       |     |      |      |       |      | 100   | 119          |
| S15    | 5    | 29       | Qz +    | 91.53  |       | 2.51  | 5.66  |       | 0.30  |       |      |      |       |      |      |      |      |       |     |     |       |     |      |      |       |      | 100   | 108          |
| S15    | 5    | 30       | Feohy + | 6.42   |       | 0.82  | 74.05 | 1.00  | 0.59  | 1.14  | 0.78 |      |       |      |      |      |      |       |     |     |       |     |      |      | 15.21 |      | 100   | 81           |
| S15    | 5    | 31       | Qz      | 99.57  |       |       | 0.43  |       |       |       |      |      |       |      |      |      |      |       |     |     |       |     |      |      |       |      | 100   | 119          |
| S15    | 5    | 32       | Py      |        |       |       | 32.69 |       |       |       |      |      | 67.31 |      |      |      |      |       |     |     |       |     |      |      |       |      | 100   | 182          |
| S15    | 5    | 33       | Chl?    | 27.98  | 1.50  | 15.08 | 33.33 |       | 1.19  | 0.70  | 0.38 | 1.78 |       |      |      |      |      |       |     |     |       |     |      |      | 3.07  |      | 85    | 84           |
| S15    | 5    | 34       | Mix     | 17.15  |       | 8.59  | 55.52 | 1.67  | 1.81  | 3.50  | 1.05 | 1.02 |       |      |      |      |      |       |     |     |       |     |      |      | 9.68  |      | 100   | 69           |
| S15    | 5    | 35       | Mix     | 5.52   |       | 3.65  | 27.89 | 31.97 | 1.50  | 11.59 |      |      |       |      |      |      |      |       |     |     |       |     |      |      | 17.88 |      | 100   | 72           |
| S15    | 6    | 1        | Tur     | 38.44  | 0.56  | 30.36 | 6.92  |       | 7.64  | 0.23  | 2.85 |      |       |      |      |      |      |       |     |     |       |     |      |      |       |      | 87    | 99           |

Table B8.1: EDS analyses of sample S15.

| Sample | Site | Position | Mineral | SiO2   | TiO2  | Al2O3 | FeO   | MnO   | MgO   | CaO   | Na2O  | K2O  | P2O5 | SO3   | F     | Cl | V2O5 | Cr2O3 | NiO  | ZnO | As2O3 | SrO  | ZrO2 | HfO2  | WO3  | PtO2 | Total | Actual Total |
|--------|------|----------|---------|--------|-------|-------|-------|-------|-------|-------|-------|------|------|-------|-------|----|------|-------|------|-----|-------|------|------|-------|------|------|-------|--------------|
| S15    | 6    | 2        | Cpx     | 53.72  |       | 3.58  | 1.71  |       | 17.57 | 22.41 |       |      |      |       |       |    |      | 1.01  |      |     |       |      |      |       |      |      | 100   | 113          |
| S15    | 6    | 3        | Opx     | 56.44  |       | 3.31  | 5.65  | 0.24  | 33.29 | 0.53  |       |      |      |       |       |    |      | 0.54  |      |     |       |      |      |       |      |      | 100   | 118          |
| S15    | 6    | 4        | Opx     | 56.39  |       | 3.68  | 5.47  |       | 33.33 | 0.41  |       |      |      |       |       |    |      | 0.72  |      |     |       |      |      |       |      |      | 100   | 118          |
| S15    | 6    | 5        | Qz      | 100.00 |       |       |       |       |       |       |       |      |      |       |       |    |      |       |      |     |       |      |      |       |      |      | 100   | 118          |
| S15    | 6    | 6        | Ep      | 40.51  |       | 23.85 | 10.09 |       |       | 22.55 |       |      |      |       |       |    |      |       |      |     |       |      |      |       |      |      | 97    | 106          |
| S15    | 6    | 7        | Grt?    | 35.67  |       | 4.55  | 24.32 |       | 3.20  | 30.06 |       |      |      |       |       |    |      |       |      |     |       |      |      | 2.20  |      |      | 100   | 93           |
| S15    | 6    | 8        | Mix     | 25.83  | 0.80  | 12.24 | 53.75 | 0.48  | 1.37  | 0.41  | 0.65  | 0.68 |      |       |       |    |      |       |      |     |       |      |      | 3.77  |      |      | 100   | 85           |
| S15    | 6    | 9        | Py      |        |       |       | 29.89 |       |       |       | 0.36  |      |      | 69.39 |       |    |      |       |      |     | 0.36  |      |      |       |      |      | 100   | 193          |
| S15    | 6    | 10       | Opx     | 57.00  |       | 3.48  | 5.00  |       | 30.81 | 3.03  |       |      |      |       |       |    |      | 0.68  |      |     |       |      |      |       |      |      | 100   | 110          |
| S15    | 6    | 11       | Mix     | 11.38  |       | 12.23 | 60.41 | 0.40  | 1.13  | 1.10  | 0.58  | 0.65 | 1.13 |       |       |    |      |       |      |     |       |      |      | 11.00 |      |      | 100   | 76           |
| S15    | 6    | 12       | Opx     | 56.25  |       | 3.93  | 5.02  |       | 30.77 | 3.43  |       |      |      |       |       |    |      | 0.59  |      |     |       |      |      |       |      |      | 100   | 111          |
| S15    | 6    | 13       | Opx     | 55.99  |       | 4.37  | 5.40  |       | 33.04 | 0.45  |       |      |      |       |       |    |      | 0.75  |      |     |       |      |      |       |      |      | 100   | 111          |
| S15    | 6    | 14       | Ca-Rds  |        |       |       |       | 20.00 | 1.11  | 31.34 |       |      |      |       | 3.55  |    |      |       |      |     |       |      |      |       |      |      | 56    | 59           |
| S15    | 6    | 15       | Ep      | 41.67  |       | 23.60 | 10.36 |       |       | 21.37 |       |      |      |       |       |    |      |       |      |     |       |      |      |       |      |      | 97    | 102          |
| S15    | 6    | 16       | Qz      | 100.00 |       |       |       |       |       |       |       |      |      |       |       |    |      |       |      |     |       |      |      |       |      |      | 100   | 115          |
| S15    | 6    | 17       | Fl      |        |       |       | 0.25  | 0.30  | 5.75  | 47.75 |       |      |      | 0.76  | 45.19 |    |      |       |      |     |       |      |      |       |      |      | 100   | 108          |
| S15    | 6    | 18       | Opx     | 56.27  |       | 3.48  | 5.53  |       | 33.58 | 0.48  |       |      |      |       |       |    |      | 0.66  |      |     |       |      |      |       |      |      | 100   | 113          |
| S15    | 6    | 19       | Py      | 1.26   |       |       | 50.65 |       |       | 0.50  | 0.71  |      |      | 37.74 |       |    |      |       |      |     | 1.05  |      |      |       | 8.09 |      | 100   | 119          |
| S15    | 6    | 20       | Mix     | 14.14  |       | 6.64  | 39.89 | 12.13 | 1.65  | 4.14  | 0.65  | 0.63 | 1.45 | 0.88  |       |    |      |       |      |     |       |      |      | 17.78 |      |      | 100   | 87           |
| S15    | 6    | 21       | Mix     | 27.29  | 0.57  | 20.84 | 39.36 |       | 1.05  | 0.57  | 1.39  | 1.35 | 1.18 |       |       |    |      |       |      |     |       |      |      | 6.40  |      |      | 100   | 91           |
| S15    | 6    | 22       | Mix     | 6.04   |       | 11.05 | 68.76 |       | 1.07  | 0.85  | 1.49  |      | 2.20 |       |       |    |      |       |      |     |       |      |      | 8.55  |      |      | 100   | 82           |
| S15    | 6    | 23       | Ttn     | 32.95  | 30.43 | 4.36  | 6.22  | 0.40  | 2.99  | 22.21 | 0.45  |      |      |       |       |    |      |       |      |     |       |      |      |       |      |      | 100   | 110          |
| S15    | 6    | 24       | Py      |        |       |       | 37.75 |       |       | 0.58  |       |      |      | 54.35 |       |    |      |       |      |     | 0.93  |      |      |       | 4.87 | 1.53 | 100   | 169          |
| S15    | 6    | 25       | Opx     | 55.52  |       | 3.83  | 5.18  |       | 32.24 | 2.33  |       |      |      |       |       |    |      | 0.91  |      |     |       |      |      |       |      |      | 100   | 122          |
| S15    | 6    | 26       | Opx     | 56.20  |       | 3.73  | 5.52  |       | 33.37 | 0.36  |       |      |      |       |       |    |      | 0.82  |      |     |       |      |      |       |      |      | 100   | 121          |
| S15    | 6    | 27       | Feohy + | 10.29  |       | 6.93  | 72.09 | 0.89  | 1.30  | 0.82  |       | 0.47 | 0.91 |       |       |    |      |       |      |     |       |      |      | 6.30  |      |      | 100   | 76           |
| S15    | 6    | 28       | Fl      |        |       |       |       |       |       | 61.15 |       |      |      |       | 37.33 |    |      |       |      |     |       | 1.52 |      |       |      |      | 100   | 68           |
| S15    | 6    | 29       | Chl     | 33.69  |       | 16.28 | 16.93 | 0.29  | 15.81 | 1.04  | 0.97  |      |      |       |       |    |      |       |      |     |       |      |      |       |      |      | 85    | 92           |
| S15    | 6    | 30       | TiO2 +  | 3.90   | 90.57 | 1.74  | 3.12  |       |       | 0.66  |       |      |      |       |       |    |      |       |      |     |       |      |      |       |      |      | 100   | 94           |
| S15    | 7    | 1        | Chl     | 26.94  |       | 20.27 | 20.56 |       | 16.86 |       | 0.37  |      |      |       |       |    |      |       |      |     |       |      |      |       |      |      | 85    | 93           |
| S15    | 7    | 2        | Cpx     | 55.63  |       | 2.63  | 2.70  |       | 22.11 | 16.24 |       |      |      |       |       |    |      | 0.69  |      |     |       |      |      |       |      |      | 100   | 112          |
| S15    | 7    | 3        | Opx     | 56.12  |       | 3.82  | 5.49  |       | 33.29 | 0.53  |       |      |      |       |       |    |      | 0.75  |      |     |       |      |      |       |      |      | 100   | 113          |
| S15    | 7    | 4        | "Ilm" + | 3.73   | 76.55 | 9.01  | 4.83  |       | 0.54  | 1.00  | 0.49  |      | 1.98 | 0.85  |       |    |      | 1.02  |      |     |       |      |      |       |      |      | 100   | 94           |
| S15    | 7    | 5        | Ep      | 42.41  |       | 24.60 | 9.39  | 0.26  |       | 20.33 |       |      |      |       |       |    |      |       |      |     |       |      |      |       |      |      | 97    | 110          |
| S15    | 7    | 6        | Grt     | 43.67  | 0.33  | 7.38  | 34.77 | 0.40  | 5.80  | 5.46  |       | 0.50 |      | 0.70  |       |    |      | 0.98  |      |     |       |      |      |       |      |      | 100   | 107          |
| S15    | 7    | 7        | Qz      | 98.76  |       | 0.50  | 0.59  |       |       |       |       | 0.15 |      |       |       |    |      |       |      |     |       |      |      |       |      |      | 100   | 115          |
| S15    | 7    | 8        | Mix     | 15.34  | 0.84  | 10.30 | 55.94 | 0.61  | 1.34  | 1.22  |       | 0.81 | 1.74 |       |       |    |      |       |      |     |       |      |      | 11.85 |      |      | 100   | 74           |
| S15    | 7    | 9        | Ttn     | 33.00  | 36.61 | 1.31  | 1.58  |       |       | 27.51 |       |      |      |       |       |    |      |       |      |     |       |      |      |       |      |      | 100   | 107          |
| S15    | 7    | 10       | Mix     | 19.97  |       | 9.31  | 50.33 | 6.79  | 3.14  | 5.60  | 0.70  | 1.00 |      |       |       |    |      |       |      |     |       |      |      | 3.17  |      |      | 100   | 67           |
| S15    | 7    | 11       | Grt     | 39.58  |       | 20.95 | 26.76 | 2.21  | 1.79  | 8.70  |       |      |      |       |       |    |      |       |      |     |       |      |      |       |      |      | 100   | 115          |
| S15    | 7    | 12       | "Ilm" + | 9.95   | 48.40 | 1.64  | 31.67 | 2.54  |       | 5.80  |       |      |      |       |       |    |      |       |      |     |       |      |      |       |      |      | 100   | 114          |
| S15    | 7    | 13       | Feohy + | 1.90   |       | 0.79  | 80.95 | 0.55  | 1.33  | 0.89  | 0.89  |      |      | 1.64  |       |    |      |       | 1.90 |     |       |      |      | 9.16  |      |      | 100   | 74           |
| S15    | 7    | 14       | Ab      | 68.78  | 0.71  | 18.63 |       |       |       |       | 11.88 |      |      |       |       |    |      |       |      |     |       |      |      |       |      |      | 100   | 124          |
| S15    | 7    | 15       | Ep      | 39.46  |       | 20.91 | 14.22 |       |       | 22.41 |       |      |      |       |       |    |      |       |      |     |       |      |      |       |      |      | 97    | 108          |

Table B8.1: EDS analyses of sample S15.

| Sample | Site | Position | Mineral       | SiO2   | TiO2  | Al2O3 | FeO   | MnO   | MgO   | CaO   | Na2O  | K2O   | P2O5 | SO3   | F     | Cl | V2O5 | Cr2O3 | NiO | ZnO  | As2O3 | SrO | ZrO2  | HfO2 | WO3   | PtO2 | Total | Actual Total |
|--------|------|----------|---------------|--------|-------|-------|-------|-------|-------|-------|-------|-------|------|-------|-------|----|------|-------|-----|------|-------|-----|-------|------|-------|------|-------|--------------|
| S15    | 7    | 16       | Feohy +       | 4.28   |       | 1.59  | 75.34 | 1.41  | 3.39  | 2.44  |       |       | 1.49 |       |       |    |      |       |     |      |       |     |       |      | 10.06 |      | 100   | 75           |
| S15    | 7    | 17       | "Ilm" +       | 18.62  | 42.49 | 14.07 | 17.45 | 0.31  | 6.83  |       |       | 0.22  |      |       |       |    |      |       |     |      |       |     |       |      |       |      | 100   | 103          |
| S15    | 7    | 18       | Spl           |        |       | 42.11 | 17.92 |       | 16.20 |       |       |       |      |       |       |    |      | 23.22 |     | 0.55 |       |     |       |      |       |      | 100   | 108          |
| S15    | 7    | 19       | Ms            | 46.85  |       | 31.21 | 1.94  |       | 1.77  |       | 1.18  | 8.51  |      |       | 3.54  |    |      |       |     |      |       |     |       |      |       |      | 95    | 111          |
| S15    | 7    | 20       | Zrn           | 31.39  |       |       |       |       |       |       |       |       |      |       |       |    |      |       |     |      |       |     | 68.61 |      |       |      | 100   | 118          |
| S15    | 7    | 21       | ?             | 52.94  | 0.46  | 11.95 | 27.97 | 0.44  | 1.35  | 0.49  | 0.42  | 1.24  |      |       |       |    |      |       |     |      |       |     |       |      | 2.74  |      | 100   | 94           |
| S15    | 7    | 22       | Sd            |        |       |       | 48.87 | 3.70  |       | 3.43  |       |       |      |       |       |    |      |       |     |      |       |     |       |      |       |      | 56    | 58           |
| S15    | 7    | 23       | Chr +         | 7.73   | 1.64  | 3.68  | 33.60 | 0.87  | 8.38  |       |       |       |      |       |       |    | 0.58 | 42.99 |     | 0.52 |       |     |       |      |       |      | 100   | 97           |
| S15    | 7    | 24       | Ab            | 67.87  |       | 20.12 |       |       |       | 0.41  | 11.17 | 0.44  |      |       |       |    |      |       |     |      |       |     |       |      |       |      | 100   | 110          |
| S15    | 7    | 25       | Sd            |        |       |       | 47.36 | 1.42  | 0.57  | 4.93  |       |       |      |       |       |    |      |       |     |      |       |     |       |      | 1.72  |      | 56    | 57           |
| S15    | 7    | 26       | Mix           | 33.86  | 0.39  | 12.00 | 47.18 | 0.47  | 1.22  | 0.52  |       | 1.11  |      |       |       |    |      |       |     |      |       |     |       |      | 3.25  |      | 100   | 83           |
| S15    | 7    | 27       | Mix           | 5.76   | 73.15 | 7.12  | 5.56  |       | 0.85  | 1.08  | 0.61  | 0.27  | 1.17 |       |       |    | 1.52 | 0.82  |     |      |       |     |       |      | 2.09  |      | 100   | 88           |
| S15    | 7    | 28       | Ab            | 69.59  |       | 18.56 |       |       |       |       | 11.85 |       |      |       |       |    |      |       |     |      |       |     |       |      |       |      | 100   | 113          |
| S15    | 7    | 29       | Ep            | 40.18  |       | 23.64 | 10.51 |       |       | 22.68 |       |       |      |       |       |    |      |       |     |      |       |     |       |      |       |      | 97    | 113          |
| S15    | 7    | 30       | Spl           |        |       | 46.65 | 13.71 |       | 18.04 |       |       |       |      |       |       |    |      | 21.61 |     |      |       |     |       |      |       |      | 100   | 113          |
| S15    | 7    | 31       | Mix           | 50.54  |       | 24.80 | 4.18  |       | 0.88  | 15.09 | 4.50  |       |      |       |       |    |      |       |     |      |       |     |       |      |       |      | 100   | 115          |
| S15    | 7    | 32       | Qz +          | 71.00  |       | 16.48 | 2.88  |       | 1.82  | 0.33  | 4.96  | 2.53  |      |       |       |    |      |       |     |      |       |     |       |      |       |      | 100   | 116          |
| S15    | 8    | 1        | Ep            | 39.98  |       | 20.23 | 13.01 |       | 1.33  | 22.46 |       |       |      |       |       |    |      |       |     |      |       |     |       |      |       |      | 97    | 97           |
| S15    | 8    | 2        | Opx           | 56.70  |       | 2.84  | 5.24  |       | 33.05 | 1.46  |       |       |      |       |       |    |      | 0.71  |     |      |       |     |       |      |       |      | 100   | 113          |
| S15    | 8    | 3        | Opx           | 56.32  |       | 3.86  | 5.43  |       | 33.12 | 0.62  |       |       |      |       |       |    |      | 0.64  |     |      |       |     |       |      |       |      | 100   | 117          |
| S15    | 8    | 4        | Py            | 0.91   |       |       | 37.07 |       |       | 0.18  | 0.50  |       |      | 55.92 |       |    |      |       |     |      |       |     |       |      | 3.90  | 1.51 | 100   | 173          |
| S15    | 8    | 5        | Mix           | 3.51   |       | 2.18  | 9.99  | 26.44 | 2.94  | 46.83 |       |       |      |       | 8.11  |    |      |       |     |      |       |     |       |      |       |      | 100   | 68           |
| S15    | 8    | 6        | Mix           | 24.43  | 0.54  | 15.21 | 48.18 | 1.00  | 1.19  | 1.19  | 0.59  | 1.08  | 1.08 |       |       |    |      |       |     |      |       |     |       |      | 5.51  |      | 100   | 92           |
| S15    | 8    | 7        | Mix           | 25.01  | 0.53  | 16.29 | 45.54 | 0.97  | 2.57  | 0.56  | 0.49  | 1.81  | 1.02 |       |       |    |      |       |     |      |       |     |       |      | 5.22  |      | 100   | 85           |
| S15    | 8    | 8        | Opx           | 56.53  |       | 3.12  | 5.86  |       | 33.68 | 0.35  |       |       |      |       |       |    |      | 0.47  |     |      |       |     |       |      |       |      | 100   | 120          |
| S15    | 8    | 9        | Fl            |        |       |       |       |       |       | 55.20 | 0.67  |       |      |       | 44.12 |    |      |       |     |      |       |     |       |      |       |      | 100   | 106          |
| S15    | 8    | 10       | Garnet (Spes) | 38.54  |       | 20.13 | 15.80 | 25.30 |       | 0.22  |       |       |      |       |       |    |      |       |     |      |       |     |       |      |       |      | 100   | 109          |
| S15    | 8    | 11       | Mix           | 33.66  | 12.62 | 8.01  | 19.51 |       | 10.90 | 11.66 | 1.40  |       |      |       |       |    |      |       |     |      |       |     |       |      | 2.24  |      | 100   | 86           |
| S15    | 8    | 12       | ?Gln          | 67.73  |       | 12.65 | 8.46  |       | 3.61  | 0.73  | 6.66  | 0.16  |      |       |       |    |      |       |     |      |       |     |       |      |       |      | 100   | 104          |
| S15    | 8    | 13       | TiO2          | 0.64   | 98.78 |       | 0.58  |       |       |       |       |       |      |       |       |    |      |       |     |      |       |     |       |      |       |      | 100   | 104          |
| S15    | 8    | 14       | Qz + TiO2     | 87.32  | 11.41 | 0.48  |       |       |       | 0.79  |       |       |      |       |       |    |      |       |     |      |       |     |       |      |       |      | 100   | 116          |
| S15    | 8    | 15       | Ttn           | 27.94  | 39.78 | 1.80  | 4.90  | 1.20  |       | 23.53 |       |       |      |       |       |    | 0.86 |       |     |      |       |     |       |      |       |      | 100   | 112          |
| S15    | 8    | 16       | Fl            |        |       |       | 0.77  |       | 6.51  | 47.97 | 0.48  |       |      | 0.85  | 43.42 |    |      |       |     |      |       |     |       |      |       |      | 100   | 112          |
| S15    | 8    | 17       | Rds           | 1.48   |       |       |       | 40.76 | 0.46  | 8.56  |       |       |      |       | 4.74  |    |      |       |     |      |       |     |       |      |       |      | 56    | 67           |
| S15    | 8    | 18       | Grt           | 39.28  |       | 20.81 | 25.02 | 6.77  | 0.60  | 7.52  |       |       |      |       |       |    |      |       |     |      |       |     |       |      |       |      | 100   | 116          |
| S15    | 8    | 19       | Amph          | 57.54  |       | 1.49  | 2.89  |       | 22.12 | 12.25 | 0.31  |       |      |       |       |    |      | 0.40  |     |      |       |     |       |      |       |      | 97    | 117          |
| S15    | 8    | 20       | Mix           | 6.98   | 0.64  | 5.67  | 62.13 | 8.47  | 2.35  | 4.80  |       | 0.38  | 0.96 |       |       |    |      |       |     |      |       |     |       |      | 7.63  |      | 100   | 74           |
| S15    | 8    | 21       | Qz            | 100.00 |       |       |       |       |       |       |       |       |      |       |       |    |      |       |     |      |       |     |       |      |       |      | 100   | 121          |
| S15    | 8    | 22       | Ep            | 39.92  |       | 23.23 | 11.10 |       |       | 22.75 |       |       |      |       |       |    |      |       |     |      |       |     |       |      |       |      | 97    | 108          |
| S15    | 8    | 23       | Ms +          | 50.03  | 0.98  | 25.85 | 4.60  |       | 2.62  |       |       | 10.92 |      |       |       |    |      |       |     |      |       |     |       |      |       |      | 95    | 105          |
| S15    | 8    | 24       | Spl           |        |       | 40.83 | 14.66 |       | 17.21 |       |       |       |      |       |       |    | 0.33 | 26.97 |     |      |       |     |       |      |       |      | 100   | 104          |
| S15    | 8    | 25       | Chl           | 26.15  |       | 21.05 | 22.23 |       | 15.57 |       |       |       |      |       |       |    |      |       |     |      |       |     |       |      |       |      | 85    | 95           |
| S15    | 8    | 26       | Spl           |        |       | 42.05 | 17.83 |       | 16.71 |       |       |       |      |       |       |    |      | 23.41 |     |      |       |     |       |      |       |      | 100   | 106          |
| S15    | 8    | 27       | Grt           | 38.01  |       | 0.95  | 26.63 |       | 0.51  | 33.89 |       |       |      |       |       |    |      |       |     |      |       |     |       |      |       |      | 100   | 97           |

Table B8.1: EDS analyses of sample S15.

| Sample | Site | Position | Mineral | SiO2  | TiO2  | Al2O3 | FeO   | MnO   | MgO   | CaO   | Na2O  | K2O  | P2O5 | SO3   | F     | Cl | V2O5 | Cr2O3 | NiO  | ZnO  | As2O3 | SrO | ZrO2  | HfO2 | WO3   | PtO2 | Total | Actual Total |    |
|--------|------|----------|---------|-------|-------|-------|-------|-------|-------|-------|-------|------|------|-------|-------|----|------|-------|------|------|-------|-----|-------|------|-------|------|-------|--------------|----|
| S15    | 9    | 1        | Ab      | 69.67 |       | 18.78 |       |       |       |       | 11.56 |      |      |       |       |    |      |       |      |      |       |     |       |      |       |      | 100   | 112          |    |
| S15    | 9    | 2        | Chl?    | 26.96 | 0.33  | 18.00 | 29.20 |       | 1.14  | 0.43  | 0.88  | 1.32 | 1.09 |       |       |    |      |       |      |      |       |     |       |      | 5.66  |      | 85    | 84           |    |
| S15    | 9    | 3        | ?       | 47.34 |       | 11.66 | 3.48  |       | 32.08 | 3.31  |       |      |      |       |       |    |      | 2.14  |      |      |       |     |       |      |       |      | 100   | 93           |    |
| S15    | 9    | 4        | Ca-Rds  |       |       |       |       | 33.75 | 0.75  | 21.50 |       |      |      |       |       |    |      |       |      |      |       |     |       |      |       |      | 56    | 57           |    |
| S15    | 9    | 5        | Opx     | 56.76 |       | 2.97  | 5.50  |       | 33.38 | 0.85  |       |      |      |       |       |    |      | 0.54  |      |      |       |     |       |      |       |      | 100   | 110          |    |
| S15    | 9    | 6        | Chr     |       | 1.45  | 19.87 | 25.33 |       | 12.21 |       |       |      |      |       |       |    | 0.47 | 40.66 |      |      |       |     |       |      |       |      | 100   | 101          |    |
| S15    | 9    | 7        | Sd      | 0.62  |       |       | 40.93 | 4.21  | 0.71  | 6.59  |       |      |      | 0.88  |       |    |      |       |      |      |       |     |       |      | 2.06  |      | 56    | 60           |    |
| S15    | 9    | 8        | Feohy + | 7.17  |       |       | 80.79 |       |       | 0.95  | 0.77  | 0.61 | 1.87 | 2.88  |       |    |      |       |      |      | 1.31  |     |       |      | 3.65  |      | 100   | 81           |    |
| S15    | 9    | 9        | Feohy + | 8.34  | 3.58  | 4.74  | 78.05 |       |       | 0.55  | 0.99  |      |      |       |       |    |      | 0.39  |      |      |       |     |       |      | 3.36  |      | 100   | 82           |    |
| S15    | 9    | 10       | Mix     | 12.81 |       | 6.79  | 60.81 | 4.60  | 1.28  | 9.21  |       | 2.08 |      |       |       |    |      |       |      |      |       |     |       |      | 2.41  |      | 100   | 65           |    |
| S15    | 9    | 11       | Qz +    | 94.86 |       | 2.54  | 2.40  |       |       |       |       | 0.19 |      |       |       |    |      |       |      |      |       |     |       |      |       |      | 100   | 88           |    |
| S15    | 9    | 12       | Chr     |       | 1.67  | 21.42 | 20.95 |       | 14.69 |       |       |      |      |       |       |    | 0.42 | 40.85 |      |      |       |     |       |      |       |      | 100   | 106          |    |
| S15    | 9    | 13       | Opx     | 56.44 |       | 3.29  | 5.67  |       | 33.54 | 0.45  |       |      |      |       |       |    |      | 0.61  |      |      |       |     |       |      |       |      | 100   | 116          |    |
| S15    | 9    | 14       | Qz      | 99.74 |       |       | 0.26  |       |       |       |       |      |      |       |       |    |      |       |      |      |       |     |       |      |       |      | 100   | 121          |    |
| S15    | 9    | 15       | Mix     | 13.62 |       | 6.80  | 67.94 | 1.50  | 1.08  | 0.84  |       | 0.50 | 0.96 |       |       |    |      |       |      |      |       |     |       |      | 6.77  |      | 100   | 74           |    |
| S15    | 9    | 16       | Mix     | 18.08 | 1.76  | 10.23 | 60.50 | 2.16  | 1.48  | 0.64  | 0.78  | 0.93 |      |       |       |    |      |       |      |      |       |     |       |      | 3.45  |      | 100   | 78           |    |
| S15    | 9    | 17       | Cpx     | 54.50 |       | 3.00  | 1.43  |       | 17.10 | 23.18 |       |      |      |       |       |    |      | 0.79  |      |      |       |     |       |      |       |      | 100   | 112          |    |
| S15    | 9    | 18       | Cpx     | 53.82 |       | 3.59  | 1.88  |       | 16.83 | 22.89 |       |      |      |       |       |    |      | 0.98  |      |      |       |     |       |      |       |      | 100   | 113          |    |
| S15    | 9    | 19       | Opx     | 55.85 |       | 3.86  | 5.49  |       | 32.89 | 1.10  |       |      |      |       |       |    |      | 0.82  |      |      |       |     |       |      |       |      | 100   | 115          |    |
| S15    | 9    | 20       | Grt     | 39.79 |       | 21.39 | 27.74 | 0.68  | 4.59  | 5.81  |       |      |      |       |       |    |      |       |      |      |       |     |       |      |       |      | 100   | 109          |    |
| S15    | 9    | 21       | Feohy + | 1.33  |       |       | 69.89 |       |       | 1.16  | 0.73  |      |      | 14.25 |       |    |      |       |      |      | 1.23  |     |       |      | 11.41 |      | 100   | 85           |    |
| S15    | 9    | 22       | Spl     |       |       | 47.22 | 16.29 |       | 17.22 |       |       |      |      |       |       |    |      | 19.27 |      |      |       |     |       |      |       |      | 100   | 110          |    |
| S15    | 9    | 23       | TiO2    | 0.47  | 99.20 |       | 0.33  |       |       |       |       |      |      |       |       |    |      |       |      |      |       |     |       |      |       |      | 100   | 113          |    |
| S15    | 9    | 24       | Ms +    | 71.58 | 0.29  | 16.45 | 3.09  |       | 2.44  |       |       | 6.15 |      |       |       |    |      |       |      |      |       |     |       |      |       |      | 100   | 119          |    |
| S15    | 9    | 25       | Fl      |       |       |       |       |       |       | 55.02 | 0.68  |      |      |       | 44.30 |    |      |       |      |      |       |     |       |      |       |      | 100   | 110          |    |
| S15    | 9    | 26       | Mix     | 22.71 | 0.39  | 15.69 | 50.56 | 1.02  | 1.60  | 0.74  |       | 1.12 | 0.91 |       |       |    |      |       |      |      |       |     |       |      | 5.26  |      | 100   | 84           |    |
| S15    | 9    | 27       | Qz      | 99.59 |       |       | 0.41  |       |       |       |       |      |      |       |       |    |      |       |      |      |       |     |       |      |       |      | 100   | 118          |    |
| S15    | 9    | 28       | Rds +   | 3.72  |       | 1.57  | 19.96 | 21.63 | 0.82  | 6.74  |       |      |      |       |       |    |      |       |      |      |       |     |       |      | 1.56  |      | 56    | 65           |    |
| S15    | 9    | 29       | Rds +   | 0.94  |       | 0.65  | 9.78  | 41.20 |       | 3.43  |       |      |      |       |       |    |      |       |      |      |       |     |       |      |       |      | 56    | 60           |    |
| S15    | 9    | 30       | Feohy + | 3.33  |       | 0.92  | 72.38 | 0.97  | 1.01  | 2.74  | 1.67  |      | 2.00 |       |       |    |      |       |      |      |       |     |       |      | 14.98 |      | 100   | 72           |    |
| S15    | 9    | 31       | Ep      | 40.13 |       | 26.36 | 8.05  | 0.38  |       | 22.08 |       |      |      |       |       |    |      |       |      |      |       |     |       |      |       |      | 97    | 104          |    |
| S15    | 10   | 1        | Ca-Rds  |       |       |       | 1.36  | 37.89 | 1.45  | 15.30 |       |      |      |       |       |    |      |       |      |      |       |     |       |      |       |      | 56    | 59           |    |
| S15    | 10   | 2        | Sd      | 1.80  |       | 0.49  | 33.76 | 3.99  | 0.77  | 3.02  | 0.54  |      | 0.89 | 0.59  |       |    |      |       |      |      |       |     |       |      | 10.14 |      | 56    | 86           |    |
| S15    | 10   | 3        | Ca-Rds  |       |       |       |       | 33.96 | 0.69  | 15.88 |       |      |      |       | 3.79  |    |      |       |      |      |       |     |       |      |       | 1.69 |       | 56           | 68 |
| S15    | 10   | 4        | Opx     | 56.84 |       | 2.79  | 5.62  |       | 33.79 | 0.49  |       |      |      |       |       |    |      | 0.46  |      |      |       |     |       |      |       |      | 100   | 116          |    |
| S15    | 10   | 5        | Mix     | 20.41 | 0.94  | 8.76  | 55.34 | 0.39  | 10.58 | 0.46  | 0.49  |      |      |       |       |    |      |       | 0.44 |      |       |     |       |      | 2.20  |      | 100   | 82           |    |
| S15    | 10   | 6        | Ca-Rds  |       |       |       |       | 19.17 | 3.15  | 29.30 | 0.43  |      |      | 0.60  | 3.35  |    |      |       |      |      |       |     |       |      |       |      | 56    | 61           |    |
| S15    | 10   | 7        | Chr     |       |       | 10.41 | 22.44 |       | 9.34  |       |       |      |      |       |       |    |      | 57.81 |      |      |       |     |       |      |       |      | 100   | 106          |    |
| S15    | 10   | 8        | Zrn     | 31.57 |       |       |       |       |       |       |       |      |      |       |       |    |      |       |      |      |       |     | 66.98 | 1.45 |       |      | 100   | 110          |    |
| S15    | 10   | 9        | Ab      | 68.73 |       | 19.30 |       |       |       | 0.41  | 11.37 | 0.18 |      |       |       |    |      |       |      |      |       |     |       |      |       |      | 100   | 111          |    |
| S15    | 10   | 10       | Cpx     | 53.01 | 0.89  | 3.58  | 6.56  |       | 15.74 | 19.83 | 0.39  |      |      |       |       |    |      |       |      |      |       |     |       |      |       |      | 100   | 109          |    |
| S15    | 10   | 11       | Chr +   | 4.76  |       | 20.72 | 29.62 | 0.76  | 8.92  |       |       |      |      |       |       |    |      | 34.13 |      | 1.10 |       |     |       |      |       |      | 100   | 104          |    |
| S15    | 10   | 12       | Opx     | 55.92 |       | 4.42  | 5.65  |       | 32.76 | 0.51  |       |      |      |       |       |    |      | 0.73  |      |      |       |     |       |      |       |      | 100   | 112          |    |
| S15    | 10   | 13       | Opx     | 56.52 |       | 3.38  | 5.54  |       | 33.47 | 0.43  |       |      |      |       |       |    |      | 0.67  |      |      |       |     |       |      |       |      | 100   | 114          |    |

Table B8.1: EDS analyses of sample S15.

| Sample | Site | Position | Mineral   | SiO2   | TiO2  | Al2O3 | FeO   | MnO   | MgO   | CaO   | Na2O  | K2O  | P2O5 | SO3   | F     | Cl | V2O5 | Cr2O3 | NiO | ZnO | As2O3 | SrO  | ZrO2 | HfO2 | WO3  | PtO2 | Total | Actual Total |
|--------|------|----------|-----------|--------|-------|-------|-------|-------|-------|-------|-------|------|------|-------|-------|----|------|-------|-----|-----|-------|------|------|------|------|------|-------|--------------|
| S15    | 10   | 14       | Opx       | 56.18  |       | 3.71  | 5.45  |       | 33.34 | 0.48  |       |      |      |       |       |    |      | 0.84  |     |     |       |      |      |      |      |      | 100   | 114          |
| S15    | 10   | 15       | Sd        | 0.76   |       | 0.19  | 48.97 | 0.29  | 0.24  | 1.09  |       |      |      | 0.34  |       |    |      |       |     |     |       |      |      |      | 4.14 |      | 56    | 67           |
| S15    | 10   | 16       | Qz        | 100.00 |       |       |       |       |       |       |       |      |      |       |       |    |      |       |     |     |       |      |      |      |      |      | 100   | 120          |
| S15    | 10   | 17       | Qz + Ep   | 74.62  |       | 9.75  | 5.98  |       |       | 9.64  |       |      |      |       |       |    |      |       |     |     |       |      |      |      |      |      | 100   | 107          |
| S15    | 10   | 18       | Tur       | 38.45  | 0.44  | 30.70 | 6.28  |       | 8.09  | 0.21  | 2.84  |      |      |       |       |    |      |       |     |     |       |      |      |      |      |      | 87    | 100          |
| S15    | 10   | 19       | Fl        |        |       |       |       |       | 0.65  | 48.74 |       |      |      |       | 50.61 |    |      |       |     |     |       |      |      |      |      |      | 100   | 125          |
| S15    | 10   | 20       | Chl       | 28.10  |       | 15.26 | 7.39  |       | 26.98 |       |       |      |      |       |       |    |      | 7.28  |     |     |       |      |      |      |      |      | 85    | 92           |
| S15    | 10   | 21       | Spl       |        | 0.46  | 31.30 | 23.36 | 0.65  | 12.97 |       |       |      |      |       |       |    |      | 31.25 |     |     |       |      |      |      |      |      | 100   | 109          |
| S15    | 10   | 22       | Chr       |        | 0.85  | 2.84  | 67.15 | 0.70  | 1.75  |       |       |      |      |       |       |    |      | 26.71 |     |     |       |      |      |      |      |      | 100   | 100          |
| S15    | 10   | 23       | Ca-Rds    | 2.12   |       | 1.28  | 1.26  | 25.20 | 0.82  | 20.05 |       |      |      |       | 5.26  |    |      |       |     |     |       |      |      |      |      |      | 56    | 65           |
| S15    | 10   | 24       | Chr       | 0.63   |       | 16.40 | 20.50 |       | 8.13  |       |       |      |      |       |       |    |      | 54.34 |     |     |       |      |      |      |      |      | 100   | 99           |
| S15    | 10   | 25       | Chl       | 26.76  |       | 21.22 | 21.43 |       | 15.59 |       |       |      |      |       |       |    |      |       |     |     |       |      |      |      |      |      | 85    | 99           |
| S15    | 10   | 26       | Fl        |        |       |       |       |       |       | 52.81 |       |      |      |       | 45.71 |    |      |       |     |     |       | 1.48 |      |      |      |      | 100   | 69           |
| S15    | 10   | 27       | TiO2      | 0.71   | 98.61 | 0.38  | 0.31  |       |       |       |       |      |      |       |       |    |      |       |     |     |       |      |      |      |      |      | 100   | 106          |
| S15    | 10   | 28       | Fl        |        |       |       |       |       | 0.59  | 52.12 | 0.40  |      |      |       | 46.90 |    |      |       |     |     |       |      |      |      |      |      | 100   | 119          |
| S15    | 10   | 29       | Fe-Rds    | 0.41   |       |       | 24.40 | 24.76 |       | 6.43  |       |      |      |       |       |    |      |       |     |     |       |      |      |      |      |      | 56    | 64           |
| S15    | 10   | 30       | Rds       |        |       |       | 1.24  | 42.05 | 1.22  | 11.49 |       |      |      |       |       |    |      |       |     |     |       |      |      |      |      |      | 56    | 62           |
| S15    | 10   | 31       | Ep        | 39.77  |       | 18.70 | 16.53 |       |       | 22.00 |       |      |      |       |       |    |      |       |     |     |       |      |      |      |      |      | 97    | 105          |
| S15    | 10   | 32       | Cpx       | 54.97  |       | 2.21  | 1.76  |       | 17.48 | 23.03 |       |      |      |       |       |    |      | 0.54  |     |     |       |      |      |      |      |      | 100   | 116          |
| S15    | 10   | 33       | Opx       | 55.28  |       | 5.13  | 5.42  |       | 31.61 | 1.84  |       |      |      |       |       |    |      | 0.72  |     |     |       |      |      |      |      |      | 100   | 113          |
| S15    | 11   | 1        | Grt       | 39.15  |       | 20.86 | 29.11 | 7.22  | 1.98  | 1.68  |       |      |      |       |       |    |      |       |     |     |       |      |      |      |      |      | 100   | 115          |
| S15    | 11   | 2        | Chr       |        |       | 18.80 | 22.25 |       | 9.95  |       |       |      |      |       |       |    | 0.36 | 48.64 |     |     |       |      |      |      |      |      | 100   | 108          |
| S15    | 11   | 3        | Ep        | 40.10  |       | 26.01 | 7.79  |       |       | 23.10 |       |      |      |       |       |    |      |       |     |     |       |      |      |      |      |      | 97    | 110          |
| S15    | 11   | 4        | Ab        | 69.20  |       | 18.94 |       |       |       | 0.32  | 11.54 |      |      |       |       |    |      |       |     |     |       |      |      |      |      |      | 100   | 118          |
| S15    | 11   | 5        | Opx       | 55.53  |       | 1.36  | 2.58  |       | 17.48 | 22.22 |       |      |      |       |       |    |      | 0.83  |     |     |       |      |      |      |      |      | 100   | 115          |
| S15    | 11   | 6        | Amph      | 57.21  |       | 1.61  | 2.68  |       | 22.51 | 12.14 | 0.37  |      |      |       |       |    |      | 0.48  |     |     |       |      |      |      |      |      | 97    | 114          |
| S15    | 11   | 7        | Amph      | 57.29  |       | 2.56  | 2.56  |       | 23.62 | 9.82  | 0.51  |      |      |       |       |    |      | 0.64  |     |     |       |      |      |      |      |      | 97    | 115          |
| S15    | 11   | 8        | Qz + TiO2 | 80.52  | 19.25 |       | 0.23  |       |       |       |       |      |      |       |       |    |      |       |     |     |       |      |      |      |      |      | 100   | 123          |
| S15    | 11   | 9        | TiO2 +    | 7.54   | 91.21 |       | 1.25  |       |       |       |       |      |      |       |       |    |      |       |     |     |       |      |      |      |      |      | 100   | 113          |
| S15    | 11   | 10       | Sd        | 1.61   |       | 1.13  | 42.34 | 3.99  | 0.89  | 6.05  |       |      |      |       |       |    |      |       |     |     |       |      |      |      |      |      | 56    | 65           |
| S15    | 11   | 11       | Opx       | 56.51  |       | 3.32  | 5.81  |       | 33.39 | 0.37  |       |      |      |       |       |    |      | 0.59  |     |     |       |      |      |      |      |      | 100   | 122          |
| S15    | 11   | 12       | Opx       | 56.70  |       | 3.19  | 5.38  |       | 33.76 | 0.35  |       |      |      |       |       |    |      | 0.62  |     |     |       |      |      |      |      |      | 100   | 112          |
| S15    | 11   | 13       | Fl        |        |       |       |       |       | 5.74  | 46.55 | 0.35  |      |      | 0.59  | 46.77 |    |      |       |     |     |       |      |      |      |      |      | 100   | 110          |
| S15    | 11   | 14       | Py        | 0.67   |       |       | 38.46 |       |       | 0.21  |       |      |      | 57.38 |       |    |      |       |     |     |       |      |      | 1.31 |      | 1.97 | 100   | 165          |
| S15    | 11   | 15       | Ttn       | 30.60  | 42.25 | 0.34  | 1.08  |       |       | 25.73 |       |      |      |       |       |    |      |       |     |     |       |      |      |      |      |      | 100   | 106          |
| S15    | 12   | 1        | Fl        |        |       |       |       |       |       | 56.11 | 0.68  |      |      |       | 43.21 |    |      |       |     |     |       |      |      |      |      |      | 100   | 86           |
| S15    | 12   | 2        | Qz        | 100.00 |       |       |       |       |       |       |       |      |      |       |       |    |      |       |     |     |       |      |      |      |      |      | 100   | 114          |
| S15    | 12   | 3        | Feohy +   | 3.35   |       | 6.41  | 76.93 | 1.68  | 1.58  | 1.12  |       |      | 1.41 |       |       |    |      |       |     |     |       |      |      |      | 7.52 |      | 100   | 72           |
| S15    | 12   | 4        | Chr       |        |       | 20.27 | 18.29 |       | 11.43 |       |       |      |      |       |       |    | 0.38 | 49.63 |     |     |       |      |      |      |      |      | 100   | 103          |
| S15    | 12   | 5        | Chr       |        |       | 5.69  | 19.37 |       | 9.45  |       |       |      |      |       |       |    |      | 65.49 |     |     |       |      |      |      |      |      | 100   | 103          |
| S15    | 12   | 6        | Rds       | 1.40   |       | 0.83  | 0.72  | 43.49 | 0.49  | 9.07  |       |      |      |       |       |    |      |       |     |     |       |      |      |      |      |      | 56    | 60           |
| S15    | 12   | 7        | Mix       | 48.13  |       | 2.62  | 37.59 | 0.84  | 0.66  | 4.03  | 0.52  | 0.28 |      |       |       |    |      |       |     |     |       |      |      |      | 5.32 |      | 100   | 84           |
| S15    | 12   | 8        | Fl        |        |       |       |       |       |       | 55.66 | 0.64  |      |      |       | 43.71 |    |      |       |     |     |       |      |      |      |      |      | 100   | 102          |
| S15    | 12   | 9        | Chl?      | 28.67  | 0.66  | 19.84 | 26.00 |       | 1.16  | 0.73  | 0.42  | 1.16 | 0.88 |       |       |    |      |       |     |     |       |      |      |      | 5.48 |      | 85    | 86           |



Table B8.1: EDS analyses of sample S15.

| Sample | Site | Position | Mineral   | SiO2   | TiO2  | Al2O3 | FeO   | MnO   | MgO   | CaO   | Na2O  | K2O   | P2O5 | SO3   | F     | Cl | V2O5 | Cr2O3 | NiO | ZnO | As2O3 | SrO | ZrO2 | HfO2 | WO3   | PtO2 | Total | Actual Total |
|--------|------|----------|-----------|--------|-------|-------|-------|-------|-------|-------|-------|-------|------|-------|-------|----|------|-------|-----|-----|-------|-----|------|------|-------|------|-------|--------------|
| S15    | 12   | 10       | Qz        | 100.00 |       |       |       |       |       |       |       |       |      |       |       |    |      |       |     |     |       |     |      |      |       |      | 100   | 117          |
| S15    | 12   | 11       | Py        |        |       |       | 28.93 |       |       |       | 0.25  |       |      | 70.83 |       |    |      |       |     |     |       |     |      |      |       |      | 100   | 217          |
| S15    | 12   | 12       | Feohy +   | 1.84   |       | 0.97  | 72.48 | 1.06  | 0.91  | 6.71  |       |       | 1.77 |       |       |    |      |       |     |     |       |     |      |      | 14.27 |      | 100   | 72           |
| S15    | 12   | 13       | Feohy +   | 4.02   |       | 1.57  | 70.48 | 0.73  | 0.84  | 5.44  |       |       | 1.96 |       |       |    |      |       |     |     |       |     |      |      | 14.96 |      | 100   | 77           |
| S15    | 12   | 14       | Opx       | -2.00  |       | 3.59  | 5.71  |       | 32.60 | 1.00  |       |       |      |       |       |    |      | 0.50  |     |     |       |     |      |      |       |      | 100   | 120          |
| S15    | 12   | 15       | Py        | 0.89   |       | 0.41  | 31.11 |       |       |       |       |       |      | 65.70 |       |    |      |       |     |     | 1.89  |     |      |      |       |      | 100   | 204          |
| S15    | 12   | 16       | Ca-Rds    | 2.51   |       | 1.49  | 11.34 | 22.55 | 2.40  | 13.38 |       |       |      |       | 2.33  |    |      |       |     |     |       |     |      |      |       |      | 56    | 65           |
| S15    | 12   | 17       | Act       | 56.89  |       | 2.58  | 2.56  |       | 21.94 | 12.62 |       |       |      |       |       |    |      | 0.41  |     |     |       |     |      |      |       |      | 97    | 113          |
| S15    | 12   | 18       | Opx       | 56.01  |       | 4.02  | 5.49  |       | 33.27 | 0.40  |       |       |      |       |       |    |      | 0.80  |     |     |       |     |      |      |       |      | 100   | 115          |
| S15    | 13   | 1        | Chl       | 25.53  |       | 14.43 | 23.02 | 0.27  | 14.92 | 0.23  |       |       |      | 6.60  |       |    |      |       |     |     |       |     |      |      |       |      | 85    | 93           |
| S15    | 13   | 2        | Opx       | 55.71  |       | 3.09  | 4.84  |       | 30.25 | 5.37  |       |       |      |       |       |    |      | 0.75  |     |     |       |     |      |      |       |      | 100   | 111          |
| S15    | 13   | 3        | Olig      | 66.92  |       | 20.64 |       |       |       | 3.06  | 9.38  |       |      |       |       |    |      |       |     |     |       |     |      |      |       |      | 100   | 117          |
| S15    | 13   | 4        | Opx       | 55.98  |       | 3.87  | 5.73  |       | 33.30 | 0.39  |       |       |      |       |       |    |      | 0.74  |     |     |       |     |      |      |       |      | 100   | 117          |
| S15    | 13   | 5        | Chl +     | 26.67  |       | 20.90 | 21.74 |       | 15.69 |       |       |       |      |       |       |    |      |       |     |     |       |     |      |      |       |      | 85    | 92           |
| S15    | 13   | 6        | Sd +      | 1.33   |       | 1.80  | 42.77 | 0.67  | 0.74  | 0.54  | 0.49  |       | 0.70 | 0.78  |       |    |      |       |     |     |       |     |      |      | 6.17  |      | 56    | 59           |
| S15    | 13   | 7        | Mix       | 22.66  | 0.61  | 9.10  | 46.91 |       | 12.24 | 0.56  | 1.51  |       | 1.14 |       |       |    |      |       |     |     |       |     |      |      | 5.28  |      | 100   | 87           |
| S15    | 13   | 8        | Grt       | 39.80  |       | 20.98 | 26.18 | 1.32  | 2.15  | 9.58  |       |       |      |       |       |    |      |       |     |     |       |     |      |      |       |      | 100   | 111          |
| S15    | 13   | 9        | Ca-Rds    | 3.62   |       | 2.69  | 2.26  | 23.75 | 0.83  | 17.22 |       | 0.23  |      | 1.78  | 3.62  |    |      |       |     |     |       |     |      |      |       |      | 56    | 72           |
| S15    | 13   | 10       | Ca-Fe-Rds | 6.38   |       | 3.99  | 5.91  | 21.35 | 0.78  | 11.43 |       | 0.22  |      |       |       |    |      |       |     |     |       |     |      |      | 5.93  |      | 56    | 73           |
| S15    | 13   | 11       | Qz        | 100.00 |       |       |       |       |       |       |       |       |      |       |       |    |      |       |     |     |       |     |      |      |       |      | 100   | 120          |
| S15    | 13   | 12       | Cpx       | 53.94  |       | 3.77  | 1.82  |       | 16.65 | 22.77 |       |       |      |       |       |    |      | 1.05  |     |     |       |     |      |      |       |      | 100   | 116          |
| S15    | 13   | 13       | Amph      | 55.58  |       | 3.95  | 2.31  |       | 21.84 | 11.74 | 0.67  |       |      |       |       |    |      | 0.91  |     |     |       |     |      |      |       |      | 97    | 114          |
| S15    | 13   | 14       | Fl        |        |       |       |       |       |       | 63.44 | 0.78  |       |      | 0.50  | 35.27 |    |      |       |     |     |       |     |      |      |       |      | 100   | 94           |
| S15    | 13   | 15       | Fe-Rds    | 0.77   |       | 0.58  | 13.65 | 34.06 |       | 5.79  |       |       |      |       | 1.16  |    |      |       |     |     |       |     |      |      |       |      | 56    | 64           |
| S15    | 13   | 16       | Opx       | 57.15  |       | 2.37  | 5.10  |       | 33.16 | 1.75  |       |       |      |       |       |    |      | 0.47  |     |     |       |     |      |      |       |      | 100   | 123          |
| S15    | 13   | 17       | Spl       |        |       | 36.50 | 15.27 |       | 16.63 |       |       |       |      |       |       |    |      | 31.60 |     |     |       |     |      |      |       |      | 100   | 114          |
| S15    | 13   | 18       | Mix       | 46.03  | 0.60  | 13.17 | 28.37 | 0.95  | 1.80  | 1.22  |       | 1.02  |      |       |       |    |      |       |     |     |       |     |      |      | 6.83  |      | 100   | 79           |
| S15    | 13   | 19       | Spl       |        |       | 28.31 | 14.18 |       | 15.41 |       |       |       |      |       |       |    | 0.36 | 41.73 |     |     |       |     |      |      |       |      | 100   | 110          |
| S15    | 13   | 20       | Kfs       | 65.96  |       | 17.76 |       |       |       |       | 0.53  | 15.75 |      |       |       |    |      |       |     |     |       |     |      |      |       |      | 100   | 115          |
| S15    | 13   | 21       | TiO2 +    | 3.80   | 90.27 | 2.16  | 1.79  |       | 1.98  |       |       |       |      |       |       |    |      |       |     |     |       |     |      |      |       |      | 100   | 102          |
| S15    | 13   | 22       | Qz        | 99.61  | 0.39  |       |       |       |       |       |       |       |      |       |       |    |      |       |     |     |       |     |      |      |       |      | 100   | 114          |
| S15    | 13   | 23       | Opx       | 56.49  |       | 4.99  | 5.73  |       | 31.22 | 0.48  |       | 0.23  |      |       |       |    |      | 0.85  |     |     |       |     |      |      |       |      | 100   | 94           |
| S15    | 13   | 24       | Ab        | 69.62  |       | 18.76 |       |       |       |       | 11.62 |       |      |       |       |    |      |       |     |     |       |     |      |      |       |      | 100   | 117          |
| S15    | 13   | 25       | Ep        | 40.12  |       | 24.05 | 10.27 |       |       | 22.55 |       |       |      |       |       |    |      |       |     |     |       |     |      |      |       |      | 97    | 110          |
| S15    | 13   | 26       | Feohy +   | 10.69  |       | 9.44  | 71.56 | 0.55  | 1.20  | 0.50  |       | 0.27  | 0.95 |       |       |    |      |       |     |     |       |     |      |      | 4.85  |      | 100   | 82           |
| S15    | 14   | 1        | Ep        | 40.07  |       | 21.17 | 13.67 |       |       | 22.10 |       |       |      |       |       |    |      |       |     |     |       |     |      |      |       |      | 97    | 108          |
| S15    | 14   | 2        | Opx       | 56.41  |       | 2.82  | 5.05  |       | 32.88 | 1.93  |       |       |      |       |       |    |      | 0.90  |     |     |       |     |      |      |       |      | 100   | 116          |
| S15    | 14   | 3        | Opx       | 56.71  |       | 2.84  | 5.78  |       | 33.73 | 0.46  |       |       |      |       |       |    |      | 0.47  |     |     |       |     |      |      |       |      | 100   | 115          |
| S15    | 14   | 4        | Ep        | 40.09  |       | 24.71 | 9.05  |       |       | 22.49 |       |       |      |       |       |    | 0.66 |       |     |     |       |     |      |      |       |      | 97    | 105          |
| S15    | 14   | 5        | Py        |        |       | 1.03  | 50.57 |       | 0.89  | 0.77  | 0.68  |       | 1.08 | 37.05 |       |    |      |       |     |     |       |     |      |      | 7.94  |      | 100   | 110          |
| S15    | 14   | 6        | Opx?      | 54.34  |       | 4.88  | 14.10 |       | 19.42 | 5.43  | 0.50  |       |      |       |       |    |      | 1.33  |     |     |       |     |      |      |       |      | 100   | 102          |
| S15    | 14   | 7        | Fl        |        |       |       |       |       |       | 57.18 |       |       |      |       | 40.84 |    |      |       |     |     |       |     |      |      | 1.97  |      | 100   | 52           |
| S15    | 14   | 8        | "Ilm" +   | 16.97  | 42.23 | 13.57 | 20.82 | 0.33  | 5.48  |       |       |       | 0.60 |       |       |    |      |       |     |     |       |     |      |      |       |      | 100   | 103          |
| S15    | 14   | 9        | Qz +      | 98.76  | 1.24  |       |       |       |       |       |       |       |      |       |       |    |      |       |     |     |       |     |      |      |       |      | 100   | 126          |

Table B8.1: EDS analyses of sample S15.

| Sample | Site | Position | Mineral     | SiO2  | TiO2  | Al2O3 | FeO   | MnO   | MgO   | CaO   | Na2O | K2O  | P2O5 | SO3   | F     | Cl | V2O5 | Cr2O3 | NiO | ZnO | As2O3 | SrO | ZrO2 | HfO2 | WO3   | PtO2 | Total | Actual Total |
|--------|------|----------|-------------|-------|-------|-------|-------|-------|-------|-------|------|------|------|-------|-------|----|------|-------|-----|-----|-------|-----|------|------|-------|------|-------|--------------|
| S15    | 14   | 10       | TiO2        | 1.03  | 91.49 | 3.23  | 2.18  |       |       | 0.58  |      |      | 0.94 |       |       |    |      | 0.56  |     |     |       |     |      |      |       |      | 100   | 102          |
| S15    | 14   | 12       | Grt         | 39.63 |       | 20.88 | 27.18 | 2.35  | 1.29  | 8.68  |      |      |      |       |       |    |      |       |     |     |       |     |      |      |       |      | 100   | 111          |
| S15    | 14   | 13       | Fl          |       |       |       |       |       |       | 51.67 | 0.49 |      |      |       | 46.48 |    |      |       |     |     | 1.36  |     |      |      |       |      | 100   | 99           |
| S15    | 14   | 14       | Qz +        | 95.90 |       | 2.56  | 0.47  |       | 0.37  |       | 0.33 | 0.37 |      |       |       |    |      |       |     |     |       |     |      |      |       |      | 100   | 109          |
| S15    | 14   | 15       | Opx         | 57.06 |       | 2.64  | 5.21  |       | 33.92 | 0.43  |      |      |      |       |       |    |      | 0.73  |     |     |       |     |      |      |       |      | 100   | 116          |
| S15    | 14   | 16       | Opx         | 56.14 |       | 3.70  | 5.35  |       | 31.47 | 2.55  |      |      |      |       |       |    |      | 0.78  |     |     |       |     |      |      |       |      | 100   | 121          |
| S15    | 14   | 17       | Opx         | 55.64 |       | 4.28  | 4.96  |       | 29.49 | 4.85  |      |      |      |       |       |    |      | 0.78  |     |     |       |     |      |      |       |      | 100   | 119          |
| S15    | 14   | 18       | Feohy +     | 7.90  |       | 7.11  | 71.81 | 1.10  | 1.46  | 0.77  |      | 0.42 |      |       |       |    |      |       |     |     |       |     |      |      | 9.42  |      | 100   | 81           |
| S15    | 14   | 19       | Chl         | 25.97 |       | 21.26 | 22.88 |       | 14.89 |       |      |      |      |       |       |    |      |       |     |     |       |     |      |      |       |      | 85    | 101          |
| S15    | 14   | 20       | Fl          |       |       |       |       |       |       | 47.90 | 0.36 |      |      |       | 50.59 |    |      |       |     |     | 1.14  |     |      |      |       |      | 100   | 115          |
| S15    | 14   | 21       | Chr         |       |       | 18.55 | 21.22 |       | 9.51  |       |      |      |      |       |       |    |      | 50.71 |     |     |       |     |      |      |       |      | 100   | 112          |
| S15    | 15   | 1        | Qz +        | 96.14 |       | 2.12  | 0.43  |       |       |       | 1.30 |      |      |       |       |    |      |       |     |     |       |     |      |      |       |      | 100   | 115          |
| S15    | 15   | 2        | Feohy +     | 4.89  |       | 1.26  | 77.29 | 1.41  | 2.51  | 0.64  | 0.58 |      |      |       |       |    |      |       |     |     |       |     |      |      | 11.41 |      | 100   | 74           |
| S15    | 15   | 3        | Grt         | 38.09 |       | 8.54  | 18.19 |       |       | 35.18 |      |      |      |       |       |    |      |       |     |     |       |     |      |      |       |      | 100   | 102          |
| S15    | 15   | 4        | Chl         | 29.77 |       | 18.02 | 11.87 |       | 25.35 |       |      |      |      |       |       |    |      |       |     |     |       |     |      |      |       |      | 85    | 76           |
| S15    | 15   | 5        | Ep          | 40.74 |       | 21.45 | 10.27 |       | 2.03  | 22.16 |      |      |      |       |       |    | 0.35 |       |     |     |       |     |      |      |       |      | 97    | 99           |
| S15    | 15   | 6        | "Ilm" +     | 5.73  | 79.24 | 1.53  | 9.07  |       | 4.43  |       |      |      |      |       |       |    |      |       |     |     |       |     |      |      |       |      | 100   | 98           |
| S15    | 15   | 7        | "Ilm" +     | 29.25 | 27.64 | 7.69  | 11.96 |       | 21.72 | 0.47  | 1.28 |      |      |       |       |    |      |       |     |     |       |     |      |      |       |      | 100   | 99           |
| S15    | 15   | 8        | Spl         |       |       | 37.17 | 13.19 |       | 17.34 |       |      |      |      |       |       |    |      | 32.30 |     |     |       |     |      |      |       |      | 100   | 105          |
| S15    | 15   | 9        | Opx         | 56.20 |       | 3.19  | 5.23  |       | 31.93 | 2.79  |      |      |      |       |       |    |      | 0.66  |     |     |       |     |      |      |       |      | 100   | 117          |
| S15    | 15   | 10       | Opx         | 56.39 |       | 3.27  | 5.56  |       | 33.77 | 0.37  |      |      |      |       |       |    |      | 0.64  |     |     |       |     |      |      |       |      | 100   | 116          |
| S15    | 15   | 11       | Olig        | 62.97 |       | 21.69 | 0.56  |       | 0.38  | 5.44  | 8.97 |      |      |       |       |    |      |       |     |     |       |     |      |      |       |      | 100   | 113          |
| S15    | 15   | 12       | Grt         | 38.21 | 1.95  | 20.31 | 33.55 | 0.74  | 3.78  | 1.47  |      |      |      |       |       |    |      |       |     |     |       |     |      |      |       |      | 100   | 113          |
| S15    | 15   | 13       | Mix         | 51.62 |       | 39.41 | 0.79  |       |       |       | 7.39 | 0.79 |      |       |       |    |      |       |     |     |       |     |      |      |       |      | 100   | 109          |
| S15    | 15   | 14       | Qz + TiO2   | 69.08 | 30.64 |       | 0.28  |       |       |       |      |      |      |       |       |    |      |       |     |     |       |     |      |      |       |      | 100   | 117          |
| S15    | 15   | 15       | Qz          | 99.33 | 0.44  |       | 0.23  |       |       |       |      |      |      |       |       |    |      |       |     |     |       |     |      |      |       |      | 100   | 120          |
| S15    | 15   | 16       | Chl         | 26.35 |       | 21.43 | 21.44 |       | 15.41 |       | 0.37 |      |      |       |       |    |      |       |     |     |       |     |      |      |       |      | 85    | 97           |
| S15    | 15   | 17       | Mix         | 10.14 |       | 12.96 | 64.17 | 0.82  | 0.76  | 0.90  | 0.68 | 0.38 | 2.06 |       |       |    |      |       |     |     |       |     |      |      | 7.15  |      | 100   | 79           |
| S15    | 15   | 18       | Chr         |       |       | 20.82 | 18.72 |       | 12.59 |       |      |      |      |       |       |    | 0.35 | 47.53 |     |     |       |     |      |      |       |      | 100   | 112          |
| S15    | 15   | 19       | Ep          | 39.39 |       | 20.78 | 16.58 | 1.11  |       | 19.16 |      |      |      |       |       |    |      |       |     |     |       |     |      |      |       |      | 97    | 116          |
| S15    | 15   | 20       | Chl?        | 31.19 | 0.33  | 10.23 | 36.50 | 0.60  | 0.93  | 0.41  |      | 0.81 | 0.56 |       |       |    |      |       |     |     |       |     |      |      | 3.44  |      | 85    | 95           |
| S15    | 15   | 21       | Grt         | 39.35 |       | 21.13 | 31.59 | 2.33  | 4.05  | 1.55  |      |      |      |       |       |    |      |       |     |     |       |     |      |      |       |      | 100   | 116          |
| S15    | 15   | 22       | Ms +        | 47.94 | 0.34  | 29.89 | 6.47  |       | 3.02  |       | 0.48 | 6.85 |      |       |       |    |      |       |     |     |       |     |      |      |       |      | 95    | 106          |
| S15    | 15   | 23       | Spl         |       |       | 48.14 | 13.99 |       | 18.39 |       |      |      |      |       |       |    |      | 19.48 |     |     |       |     |      |      |       |      | 100   | 115          |
| S15    | 15   | 24       | Py          | 0.14  |       |       | 28.36 | 0.37  |       |       |      |      |      | 71.13 |       |    |      |       |     |     |       |     |      |      |       |      | 100   | 236          |
| S15    | 15   | 25       | Ca-Rds      | 1.92  |       | 1.10  | 0.48  | 24.04 | 2.68  | 20.80 |      |      |      |       | 4.98  |    |      |       |     |     |       |     |      |      |       |      | 56    | 69           |
| S15    | 15   | 26       | Opx         | 55.67 |       | 4.37  | 5.54  |       | 32.91 | 0.79  |      |      |      |       |       |    |      | 0.72  |     |     |       |     |      |      |       |      | 100   | 120          |
| S15    | 15   | 27       | Spl         |       |       | 48.31 | 13.73 |       | 17.96 |       |      |      |      |       |       |    |      | 20.00 |     |     |       |     |      |      |       |      | 100   | 112          |
| S15    | 16   | 1        | Opx         | 56.32 |       | 3.63  | 5.51  |       | 33.44 | 0.46  |      |      |      |       |       |    |      | 0.63  |     |     |       |     |      |      |       |      | 100   | 114          |
| S15    | 16   | 2        | Ep          | 39.88 | 0.39  | 22.67 | 11.44 | 0.59  |       | 22.04 |      |      |      |       |       |    |      |       |     |     |       |     |      |      |       |      | 97    | 106          |
| S15    | 16   | 3        | Mix (clast) | 14.27 |       | 9.49  | 54.09 | 0.40  | 1.74  | 1.37  |      | 0.40 |      |       |       |    |      |       |     |     |       |     |      |      | 18.24 |      | 100   | 77           |
| S15    | 16   | 4        | Feohy +     | 2.31  |       | 1.01  | 73.05 | 1.54  | 2.65  | 0.91  |      |      | 1.66 |       |       |    |      |       |     |     |       |     |      |      | 16.88 |      | 100   | 76           |
| S15    | 16   | 5        | Mn-Cal      |       |       |       |       | 20.17 | 3.43  | 27.72 |      |      |      | 0.53  | 4.14  |    |      |       |     |     |       |     |      |      |       |      | 56    | 61           |
| S15    | 16   | 6        | Chr         |       |       | 17.42 | 20.25 |       | 11.05 |       |      |      |      |       |       |    |      | 51.29 |     |     |       |     |      |      |       |      | 100   | 104          |

Table B8.1: EDS analyses of sample S15.

| Sample | Site | Position | Mineral | SiO2   | TiO2   | Al2O3 | FeO   | MnO   | MgO   | CaO   | Na2O | K2O  | P2O5 | SO3   | F    | Cl | V2O5 | Cr2O3 | NiO | ZnO | As2O3 | SrO | ZrO2 | HfO2 | WO3  | PtO2 | Total | Actual Total |
|--------|------|----------|---------|--------|--------|-------|-------|-------|-------|-------|------|------|------|-------|------|----|------|-------|-----|-----|-------|-----|------|------|------|------|-------|--------------|
| S15    | 16   | 7        | ?Po     | 1.06   |        | 0.88  | 51.08 |       | 0.86  | 0.78  | 0.56 |      | 0.99 | 37.14 |      |    |      |       |     |     |       |     |      |      | 6.65 |      | 100   | 111          |
| S15    | 16   | 8        | Opx     | 55.73  |        | 3.80  | 5.29  |       | 32.41 | 1.89  |      |      |      |       |      |    |      | 0.88  |     |     |       |     |      |      |      |      | 100   | 111          |
| S15    | 16   | 9        | Amph    | 52.98  | 0.28   | 5.76  | 5.56  |       | 19.47 | 11.76 | 0.83 |      |      |       |      |    |      | 0.35  |     |     |       |     |      |      |      |      | 97    | 114          |
| S15    | 16   | 10       | "Ilm"   |        | 62.73  | 0.56  | 33.09 | 2.07  | 1.03  | 0.52  |      |      |      |       |      |    |      |       |     |     |       |     |      |      |      |      | 100   | 95           |
| S15    | 16   | 11       | Cpx     | 53.45  | 0.72   | 3.30  | 5.55  |       | 16.89 | 19.26 | 0.38 |      |      |       |      |    |      | 0.45  |     |     |       |     |      |      |      |      | 100   | 111          |
| S15    | 16   | 12       | Ep      | 40.45  |        | 25.34 | 8.56  | 0.34  |       | 22.30 |      |      |      |       |      |    |      |       |     |     |       |     |      |      |      |      | 97    | 107          |
| S15    | 16   | 13       | Qz      | 99.57  |        |       | 0.43  |       |       |       |      |      |      |       |      |    |      |       |     |     |       |     |      |      |      |      | 100   | 115          |
| S15    | 16   | 14       | TiO2    |        | 99.70  |       | 0.30  |       |       |       |      |      |      |       |      |    |      |       |     |     |       |     |      |      |      |      | 100   | 105          |
| S15    | 16   | 15       | Qz      | 99.31  | 0.34   | 0.35  |       |       |       |       |      |      |      |       |      |    |      |       |     |     |       |     |      |      |      |      | 100   | 119          |
| S15    | 16   | 16       | TiO2    |        | 100.00 |       |       |       |       |       |      |      |      |       |      |    |      |       |     |     |       |     |      |      |      |      | 100   | 106          |
| S15    | 16   | 17       | Ttn     | 33.02  | 36.56  | 1.31  | 1.94  |       |       | 27.16 |      |      |      |       |      |    |      |       |     |     |       |     |      |      |      |      | 100   | 108          |
| S15    | 16   | 18       | Py      |        |        |       | 29.08 |       |       |       |      |      |      | 70.92 |      |    |      |       |     |     |       |     |      |      |      |      | 100   | 216          |
| S15    | 16   | 19       | TiO2    |        | 100.00 |       |       |       |       |       |      |      |      |       |      |    |      |       |     |     |       |     |      |      |      |      | 100   | 109          |
| S15    | 16   | 20       | TiO2 +  | 1.80   | 94.91  | 0.53  | 0.56  |       |       | 0.43  |      |      |      |       |      |    | 1.78 |       |     |     |       |     |      |      |      |      | 100   | 107          |
| S15    | 16   | 21       | Mix     | 19.91  | 5.66   | 16.08 | 37.07 | 0.35  | 9.00  | 0.66  | 1.31 |      |      | 2.12  |      |    |      | 0.65  |     |     |       |     |      |      | 7.20 |      | 100   | 86           |
| S15    | 16   | 22       | Opx     | 55.91  |        | 3.80  | 5.29  |       | 31.44 | 2.72  |      |      |      |       |      |    |      | 0.85  |     |     |       |     |      |      |      |      | 100   | 112          |
| S15    | 16   | 23       | Chl?    | 31.98  |        | 17.30 | 2.88  |       | 32.01 |       |      |      |      |       |      |    |      | 0.83  |     |     |       |     |      |      |      |      | 85    | 98           |
| S15    | 16   | 24       | Chr +   | 11.75  | 0.34   | 11.37 | 21.78 |       | 18.11 |       |      |      |      |       |      |    | 0.46 | 36.19 |     |     |       |     |      |      |      |      | 100   | 116          |
| S15    | 16   | 25       | Mn-Sd   | 3.36   |        | 1.90  | 30.63 | 10.48 | 2.77  | 6.68  |      | 0.17 |      |       |      |    |      |       |     |     |       |     |      |      |      |      | 56    | 62           |
| S15    | 16   | 26       | ?Py     | 7.50   |        | 2.69  | 36.42 |       |       |       | 0.38 | 0.40 |      | 49.37 |      |    |      |       |     |     |       |     |      |      | 1.86 | 1.38 | 100   | 151          |
| S15    | 17   | 1        | Qz      | 96.07  |        | 1.69  | 1.53  |       | 0.30  |       |      | 0.41 |      |       |      |    |      |       |     |     |       |     |      |      |      |      | 100   | 118          |
| S15    | 17   | 2        | Qz      | 100.00 |        |       |       |       |       |       |      |      |      |       |      |    |      |       |     |     |       |     |      |      |      |      | 100   | 118          |
| S15    | 17   | 3        | Cpx     | 53.94  |        | 3.27  | 1.93  |       | 18.30 | 21.78 |      |      |      |       |      |    |      | 0.78  |     |     |       |     |      |      |      |      | 100   | 113          |
| S15    | 17   | 4        | Spl     |        |        | 52.10 | 13.68 |       | 18.52 |       |      |      |      |       |      |    |      | 15.70 |     |     |       |     |      |      |      |      | 100   | 105          |
| S15    | 17   | 5        | Rds     |        |        |       |       | 41.20 | 0.64  | 14.16 |      |      |      |       |      |    |      |       |     |     |       |     |      |      |      |      | 56    | 57           |
| S15    | 17   | 6        | Grt     | 39.34  | 0.62   | 20.26 | 29.91 | 2.27  | 2.23  | 5.37  |      |      |      |       |      |    |      |       |     |     |       |     |      |      |      |      | 100   | 110          |
| S15    | 17   | 7        | Opx     | 56.40  |        | 3.67  | 5.47  |       | 32.34 | 1.46  |      |      |      |       |      |    |      | 0.66  |     |     |       |     |      |      |      |      | 100   | 118          |
| S15    | 17   | 8        | Cpx     | 54.46  |        | 3.23  | 1.81  |       | 17.18 | 22.50 |      |      |      |       |      |    |      | 0.82  |     |     |       |     |      |      |      |      | 100   | 115          |
| S15    | 17   | 9        | Py      |        |        |       | 29.18 |       |       |       |      |      |      | 70.46 |      |    |      |       |     |     | 0.36  |     |      |      |      |      | 100   | 227          |
| S15    | 17   | 10       | Ca-Rds  | 2.52   |        | 1.25  |       | 35.42 | 0.79  | 12.08 |      |      |      |       | 3.94 |    |      |       |     |     |       |     |      |      |      |      | 56    | 68           |
| S15    | 17   | 11       | Qz      | 100.00 |        |       |       |       |       |       |      |      |      |       |      |    |      |       |     |     |       |     |      |      |      |      | 100   | 122          |

Table B8.1: EDS analyses of sample S15.

| Sample | Site | Position | Mineral                                   | SiO2   | TiO2 | Al2O3 | FeO   | MnO   | MgO   | CaO   | Na2O | K2O  | P2O5 | SO3 | F     | Cl | V2O5 | Cr2O3 | NiO | ZnO | As2O3 | SrO | ZrO2 | HfO2 | WO3   | PtO2 | Total | Actual Total |
|--------|------|----------|-------------------------------------------|--------|------|-------|-------|-------|-------|-------|------|------|------|-----|-------|----|------|-------|-----|-----|-------|-----|------|------|-------|------|-------|--------------|
| S15    | 17   | 12       | Opx                                       | 56.59  |      | 3.51  | 5.62  |       | 33.22 | 0.41  |      |      |      |     |       |    |      | 0.66  |     |     |       |     |      |      |       | 100  | 117   |              |
| S15    | 17   | 13       | Chr                                       |        |      | 11.16 | 17.59 |       | 12.40 |       |      |      |      |     |       |    |      | 58.85 |     |     |       |     |      |      |       | 100  | 108   |              |
| S15    | 17   | 14       | Sd                                        | 3.19   |      | 1.23  | 32.79 | 3.73  | 0.49  | 1.44  | 0.75 |      | 0.73 |     |       |    |      |       |     |     |       |     |      |      | 11.64 | 56   | 72    |              |
| S15    | 17   | 15       | Rds                                       |        |      |       | 4.80  | 43.05 | 0.59  | 7.55  |      |      |      |     |       |    |      |       |     |     |       |     |      |      |       | 56   | 60    |              |
| S15    | 17   | 16       | Opx                                       | 56.10  |      | 3.93  | 5.57  |       | 33.19 | 0.46  |      |      |      |     |       |    |      | 0.76  |     |     |       |     |      |      |       | 100  | 116   |              |
| S15    | 17   | 17       | Feohy +                                   | 5.21   |      | 5.21  | 71.02 | 5.89  | 1.07  | 5.76  | 0.51 |      |      |     |       |    |      |       |     |     |       |     |      |      | 5.33  | 100  | 75    |              |
| S15    | 17   | 18       | Fl                                        |        |      |       |       |       |       | 59.76 |      |      |      |     | 40.24 |    |      |       |     |     |       |     |      |      |       |      | 100   | 93           |
| S15    | 17   | 19       | Spl                                       |        |      | 40.00 | 15.98 |       | 16.14 |       |      |      |      |     |       |    |      | 27.88 |     |     |       |     |      |      |       | 100  | 105   |              |
| S15    | 17   | 20       | Opx                                       | 56.32  |      | 3.60  | 5.46  |       | 33.46 | 0.38  |      |      |      |     |       |    |      | 0.78  |     |     |       |     |      |      |       | 100  | 113   |              |
| S15    | 17   | 21       | Opx                                       | 55.92  |      | 4.25  | 5.57  |       | 32.94 | 0.43  |      |      |      |     |       |    |      | 0.89  |     |     |       |     |      |      |       | 100  | 117   |              |
| S15    | 17   | 22       | Spl                                       |        |      | 31.27 | 18.04 |       | 13.85 |       |      |      |      |     |       |    |      | 36.84 |     |     |       |     |      |      |       | 100  | 107   |              |
| S15    | 17   | 23       | Feohy +                                   | 9.16   |      | 2.65  | 66.75 | 1.29  |       | 1.07  | 0.94 |      | 0.99 |     |       |    |      |       |     |     |       |     |      |      | 17.15 | 100  | 79    |              |
| S15    | 17   | 24       | Qz                                        | 100.00 |      |       |       |       |       |       |      |      |      |     |       |    |      |       |     |     |       |     |      |      |       | 100  | 114   |              |
| S15    | 17   | 25       | Mix                                       | 24.48  |      | 11.04 | 51.24 | 1.17  | 1.21  | 1.12  |      | 1.21 |      |     |       |    |      |       |     |     |       |     |      |      | 8.54  | 100  | 82    |              |
|        |      |          |                                           |        |      |       |       |       |       |       |      |      |      |     |       |    |      |       |     |     |       |     |      |      |       |      |       |              |
|        |      |          | Notes                                     |        |      |       |       |       |       |       |      |      |      |     |       |    |      |       |     |     |       |     |      |      |       |      |       |              |
|        |      |          | + = indicates other minerals present      |        |      |       |       |       |       |       |      |      |      |     |       |    |      |       |     |     |       |     |      |      |       |      |       |              |
|        |      |          | " " = indicates partially altered mineral |        |      |       |       |       |       |       |      |      |      |     |       |    |      |       |     |     |       |     |      |      |       |      |       |              |
|        |      |          |                                           |        |      |       |       |       |       |       |      |      |      |     |       |    |      |       |     |     |       |     |      |      |       |      |       |              |
|        |      |          |                                           |        |      |       |       |       |       |       |      |      |      |     |       |    |      |       |     |     |       |     |      |      |       |      |       |              |

Table B8.2 EDS analyses from sample S15.

| Sample | Site | Position | Mineral | SiO2   | TiO2 | Al2O3 | FeO   | MnO   | MgO   | CaO   | Na2O | K2O | SO3   | F    | V2O5 | Cr2O3 | ZnO | WO3  | Total | Actual Total |
|--------|------|----------|---------|--------|------|-------|-------|-------|-------|-------|------|-----|-------|------|------|-------|-----|------|-------|--------------|
| S15    | 18   | 1        | Chr     |        |      | 11.55 | 20.62 |       | 9.48  |       |      |     |       |      | 0.40 | 57.95 |     |      | 100   | 108          |
| S15    | 18   | 2        | Opx     | 56.11  |      | 3.73  | 5.69  |       | 33.30 | 0.32  |      |     |       |      |      | 0.85  |     |      | 100   | 122          |
| S15    | 18   | 3        | Opx     | 55.51  |      | 3.95  | 4.34  |       | 29.00 | 6.26  |      |     |       |      |      | 0.94  |     |      | 100   | 122          |
| S15    | 18   | 4        | Sd      |        |      |       | 29.64 | 18.78 | 1.01  | 6.19  | 0.38 |     |       |      |      |       |     |      | 56    | 64           |
| S15    | 18   | 5        | Grt     | 39.36  |      | 20.62 | 31.50 | 0.32  | 1.31  | 6.89  |      |     |       |      |      |       |     |      | 100   | 116          |
| S15    | 18   | 6        | Py      |        |      |       | 29.43 |       |       | 0.19  | 0.40 |     | 68.99 |      |      |       |     | 1.00 | 100   | 204          |
| S15    | 18   | 7        | Grt     | 39.89  |      | 21.02 | 32.76 | 0.73  | 4.01  | 1.59  |      |     |       |      |      |       |     |      | 100   | 110          |
| S15    | 18   | 8        | Qz      | 100.00 |      |       |       |       |       |       |      |     |       |      |      |       |     |      | 100   | 120          |
| S15    | 18   | 9        | Rds     | 0.44   |      | 0.37  | 5.81  | 29.58 | 0.78  | 14.08 |      |     | 0.60  | 4.34 |      |       |     |      | 56    | 65           |
| S15    | 18   | 10       | Opx     | 57.34  |      | 2.47  | 5.62  |       | 33.67 | 0.48  |      |     |       |      |      | 0.43  |     |      | 100   | 116          |
| S15    | 19   | 1        | Qz      | 100.00 |      |       |       |       |       |       |      |     |       |      |      |       |     |      | 100   | 116          |
| S15    | 19   | 2        | Opx     | 56.81  |      | 3.44  | 4.82  |       | 34.07 | 0.34  |      |     |       |      |      | 0.52  |     |      | 100   | 112          |
| S15    | 19   | 3        | Grt     | 41.98  |      | 22.41 | 14.53 | 0.30  | 10.70 | 10.07 |      |     |       |      |      |       |     |      | 100   | 113          |
| S15    | 19   | 4        | Opx     | 57.55  |      | 1.92  | 5.31  |       | 34.03 | 0.54  |      |     |       |      |      | 0.65  |     |      | 100   | 117          |
| S15    | 19   | 5        | Opx     | 56.25  |      | 3.72  | 5.65  |       | 33.28 | 0.35  |      |     |       |      |      | 0.74  |     |      | 100   | 120          |
| S15    | 19   | 6        | Opx     | 57.80  |      | 1.60  | 5.20  |       | 34.45 | 0.47  |      |     |       |      |      | 0.48  |     |      | 100   | 113          |
| S15    | 19   | 7        | Opx     | 57.34  |      | 2.06  | 5.26  |       | 34.07 | 0.69  |      |     |       |      |      | 0.58  |     |      | 100   | 116          |
| S15    | 19   | 8        | Opx     | 56.80  |      | 3.42  | 5.40  |       | 33.51 | 0.31  |      |     |       |      |      | 0.56  |     |      | 100   | 115          |
| S15    | 19   | 9        | Opx     | 56.39  |      | 3.62  | 5.62  |       | 33.23 | 0.41  |      |     |       |      |      | 0.72  |     |      | 100   | 110          |
| S15    | 19   | 10       | Opx     | 57.27  |      | 2.66  | 4.89  |       | 34.19 | 0.38  |      |     |       |      |      | 0.61  |     |      | 100   | 110          |
| S15    | 19   | 11       | Opx     | 57.83  |      | 1.49  | 4.96  |       | 34.66 | 0.46  |      |     |       |      |      | 0.61  |     |      | 100   | 110          |
| S15    | 19   | 12       | Opx     | 56.67  |      | 3.13  | 5.73  |       | 33.74 | 0.31  |      |     |       |      |      | 0.42  |     |      | 100   | 112          |
| S15    | 20   | 1        | Opx     | 56.53  |      | 3.41  | 5.54  |       | 33.42 | 0.39  |      |     |       |      |      | 0.71  |     |      | 100   | 118          |
| S15    | 20   | 2        | Chr     |        |      | 7.22  | 21.54 |       | 9.08  |       |      |     |       |      |      | 62.17 |     |      | 100   | 106          |
| S15    | 20   | 3        | Opx     | 55.96  |      | 3.87  | 5.62  |       | 33.21 | 0.45  |      |     |       |      |      | 0.89  |     |      | 100   | 117          |
| S15    | 20   | 4        | Cpx     | 54.86  |      | 2.62  | 1.72  |       | 17.05 | 22.98 |      |     |       |      |      | 0.77  |     |      | 100   | 122          |
| S15    | 20   | 5        | Cpx     | 54.71  |      | 2.26  | 5.48  |       | 17.26 | 19.73 |      |     |       |      |      | 0.56  |     |      | 100   | 117          |



Table B8.2 EDS analyses from sample S15.

| Sample | Site | Position | Mineral | SiO2  | TiO2  | Al2O3 | FeO   | MnO   | MgO   | CaO   | Na2O | K2O  | SO3  | F     | V2O5 | Cr2O3 | ZnO  | WO3  | Total | Actual Total |
|--------|------|----------|---------|-------|-------|-------|-------|-------|-------|-------|------|------|------|-------|------|-------|------|------|-------|--------------|
| S15    | 20   | 6        | Ep      | 40.52 |       | 27.93 | 5.63  |       |       | 22.93 |      |      |      |       |      |       |      |      | 97    | 112          |
| S15    | 20   | 7        | Opx     | 57.55 |       | 2.10  | 5.03  |       | 34.29 | 0.46  |      |      |      |       |      | 0.57  |      |      | 100   | 116          |
| S15    | 20   | 8        | Opx     | 57.91 |       | 1.28  | 5.31  |       | 34.63 | 0.44  |      |      |      |       |      | 0.44  |      |      | 100   | 114          |
| S15    | 20   | 9        | Ttn     | 32.80 | 37.13 | 1.43  | 1.73  |       |       | 26.91 |      |      |      |       |      |       |      |      | 100   | 110          |
| S15    | 20   | 10       | Fl      |       |       |       |       |       | 6.96  | 53.84 |      |      | 0.80 | 38.40 |      |       |      |      | 100   | 102          |
| S15    | 20   | 11       | Fl      | 2.46  |       | 0.57  | 0.34  |       | 6.87  | 42.91 | 0.46 | 0.12 | 0.57 | 45.70 |      |       |      |      | 100   | 108          |
| S15    | 20   | 12       | Chr     |       |       | 23.19 | 19.66 |       | 11.79 |       |      |      |      |       |      | 44.92 | 0.45 |      | 100   | 108          |
| S15    | 21   | 1        | Opx     | 56.04 |       | 3.97  | 5.17  |       | 32.57 | 1.44  |      |      |      |       |      | 0.81  |      |      | 100   | 114          |
| S15    | 21   | 2        | Opx     | 55.98 |       | 4.25  | 5.47  |       | 33.04 | 0.38  |      |      |      |       |      | 0.88  |      |      | 100   | 114          |
| S15    | 21   | 3        | Tur     | 31.17 | 2.40  | 26.44 | 19.26 |       | 4.09  | 1.93  | 1.71 |      |      |       |      |       |      |      | 87    | 41           |
| S15    | 21   | 4        | Cpx     | 53.32 | 0.55  | 3.43  | 4.51  |       | 16.62 | 20.28 | 0.36 |      |      |       |      | 0.93  |      |      | 100   | 112          |
| S15    | 21   | 5        | Chr     |       | 0.36  | 18.24 | 26.15 |       | 9.68  |       |      |      |      |       |      | 45.57 |      |      | 100   | 107          |
| S15    | 21   | 6        | Fl      | 3.78  |       | 1.14  | 0.30  |       | 0.31  | 49.86 | 0.53 | 0.30 |      | 43.77 |      |       |      |      | 100   | 111          |
| S15    | 21   | 7        | Opx     | 55.85 |       | 4.51  | 5.34  |       | 31.96 | 1.60  |      |      |      |       |      | 0.74  |      |      | 100   | 120          |
| S15    | 21   | 8        | Chr     |       |       | 20.89 | 18.57 |       | 12.52 |       |      |      |      |       |      | 48.02 |      |      | 100   | 111          |
| S15    | 21   | 9        | Rds+    | 15.94 |       | 5.98  | 1.28  | 42.07 | 1.99  | 24.48 |      | 0.41 |      | 7.85  |      |       |      |      | 100   | 73           |
| S15    | 21   | 10       | Ep      | 39.83 |       | 20.45 | 14.64 |       |       | 22.09 |      |      |      |       |      |       |      |      | 97    | 110          |
| S15    | 22   | 1        | Opx     | 55.97 |       | 3.90  | 5.38  |       | 33.32 | 0.55  |      |      |      |       |      | 0.87  |      |      | 100   | 116          |
| S15    | 22   | 2        | Feohy   | 16.63 |       | 8.39  | 61.27 | 1.38  | 2.54  | 1.58  | 0.54 | 0.59 |      |       |      |       |      | 7.07 | 100   | 80           |
| S15    | 22   | 3        | Opx     | 56.50 |       | 3.42  | 5.36  |       | 33.04 | 0.98  |      |      |      |       |      | 0.70  |      |      | 100   | 113          |
| S15    | 22   | 4        | Ttn     | 33.60 | 32.99 | 2.75  | 3.30  |       | 1.85  | 24.71 |      |      | 0.82 |       |      |       |      |      | 100   | 107          |
| S15    | 22   | 5        | Opx     | 56.46 |       | 3.19  | 4.94  |       | 34.13 | 0.42  |      |      |      |       |      | 0.86  |      |      | 100   | 123          |
| S15    | 22   | 6        | Opx     | 56.48 |       | 3.06  | 5.60  |       | 32.56 | 1.57  |      |      |      |       |      | 0.74  |      |      | 100   | 119          |
| S15    | 22   | 7        | Opx     | 56.49 |       | 3.33  | 5.57  | 0.20  | 33.54 | 0.37  |      |      |      |       |      | 0.50  |      |      | 100   | 115          |
| S15    | 22   | 8        | Opx     | 56.56 |       | 3.35  | 5.37  |       | 32.88 | 1.15  |      |      |      |       |      | 0.68  |      |      | 100   | 113          |
| S15    | 22   | 9        | Opx     | 57.77 |       | 1.41  | 5.24  |       | 34.50 | 0.55  |      |      |      |       |      | 0.53  |      |      | 100   | 114          |
| S15    | 22   | 10       | Opx     | 56.95 |       | 2.85  | 5.34  |       | 33.80 | 0.55  |      |      |      |       |      | 0.52  |      |      | 100   | 113          |

Table B8.2 EDS analyses from sample S15.

| Sample | Site                                          | Position | Mineral | SiO2   | TiO2 | Al2O3 | FeO   | MnO   | MgO   | CaO   | Na2O | K2O | SO3   | F     | V2O5 | Cr2O3 | ZnO | WO3 | Total | Actual Total |
|--------|-----------------------------------------------|----------|---------|--------|------|-------|-------|-------|-------|-------|------|-----|-------|-------|------|-------|-----|-----|-------|--------------|
| S15    | 23                                            | 1        | Fl      |        |      |       |       |       |       | 62.07 | 0.77 |     |       | 37.15 |      |       |     |     | 100   | 89           |
| S15    | 23                                            | 2        | Py      | 0.12   |      |       | 29.05 |       |       |       |      |     | 70.82 |       |      |       |     |     | 100   | 212          |
| S15    | 23                                            | 3        | Ep      | 39.86  |      | 22.65 | 11.69 |       |       | 22.80 |      |     |       |       |      |       |     |     | 97    | 107          |
| S15    | 23                                            | 4        | Ank     |        |      |       |       | 15.50 | 3.05  | 31.56 |      |     | 0.68  | 5.21  |      |       |     |     | 56    | 62           |
| S15    | 23                                            | 5        | Opx     | 57.59  |      | 1.85  | 5.21  |       | 34.31 | 0.39  |      |     |       |       |      | 0.64  |     |     | 100   | 118          |
| S15    | 23                                            | 6        | Opx     | 57.02  |      | 3.18  | 5.40  |       | 33.33 | 0.49  |      |     |       |       |      | 0.58  |     |     | 100   | 115          |
| S15    | 23                                            | 7        | Opx     | 56.36  |      | 3.54  | 5.73  |       | 33.32 | 0.40  |      |     |       |       |      | 0.66  |     |     | 100   | 114          |
| S15    | 23                                            | 8        | Qz      | 100.00 |      |       |       |       |       |       |      |     |       |       |      |       |     |     | 100   | 116          |
| S15    | 23                                            | 9        | Cpx     | 56.43  |      |       | 2.47  |       | 18.12 | 22.97 |      |     |       |       |      |       |     |     | 100   | 116          |
|        |                                               |          |         |        |      |       |       |       |       |       |      |     |       |       |      |       |     |     |       |              |
|        | Notes                                         |          |         |        |      |       |       |       |       |       |      |     |       |       |      |       |     |     |       |              |
|        | + = indicates that other minerals are present |          |         |        |      |       |       |       |       |       |      |     |       |       |      |       |     |     |       |              |
|        |                                               |          |         |        |      |       |       |       |       |       |      |     |       |       |      |       |     |     |       |              |
|        |                                               |          |         |        |      |       |       |       |       |       |      |     |       |       |      |       |     |     |       |              |
|        |                                               |          |         |        |      |       |       |       |       |       |      |     |       |       |      |       |     |     |       |              |
|        |                                               |          |         |        |      |       |       |       |       |       |      |     |       |       |      |       |     |     |       |              |
|        |                                               |          |         |        |      |       |       |       |       |       |      |     |       |       |      |       |     |     |       |              |
|        |                                               |          |         |        |      |       |       |       |       |       |      |     |       |       |      |       |     |     |       |              |
|        |                                               |          |         |        |      |       |       |       |       |       |      |     |       |       |      |       |     |     |       |              |

B9: SEM-BSE images and EDS  
mineral analyses for sample S17.

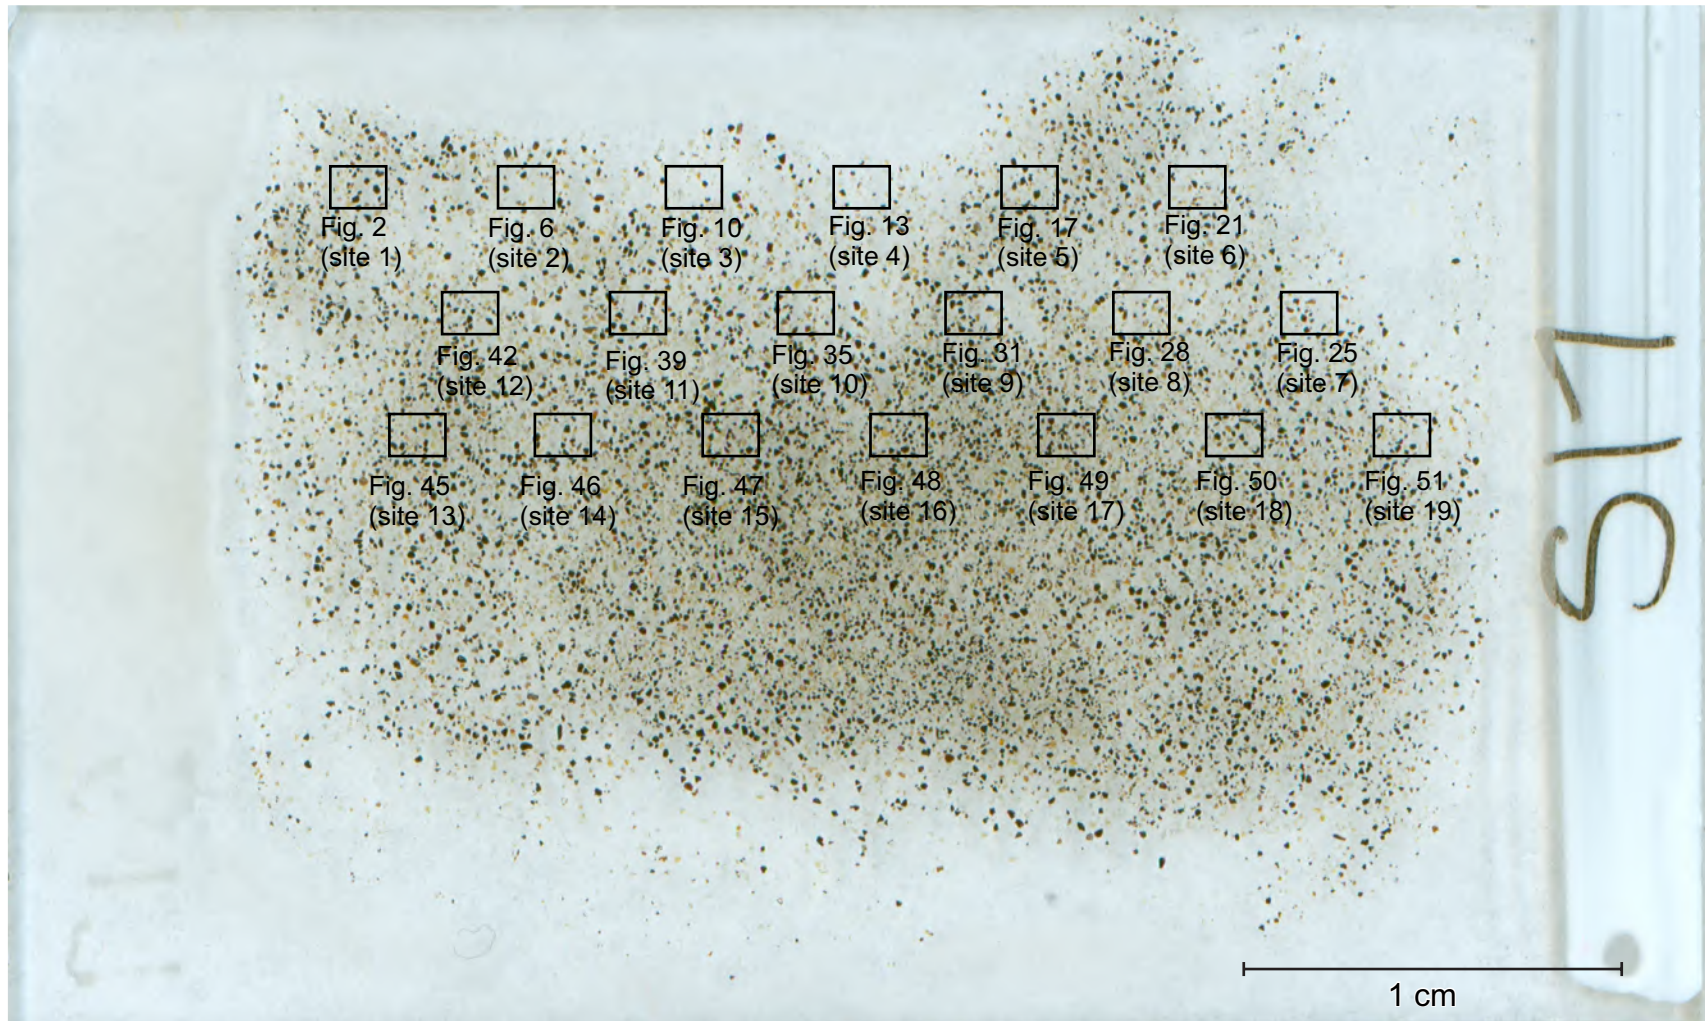

Figure B9.1: Scanned thin section of sample S17 showing the location of analysed sites. This sample comes from a large gravel pit, with cross-bedding mud - **coarse grain?** sandstone bed. Impression is that most sediment is 2-3cm sorted gravel, subrounded, predominantly limestone. With shallow channel like structures. Suggesting paleoflow was to the SW.

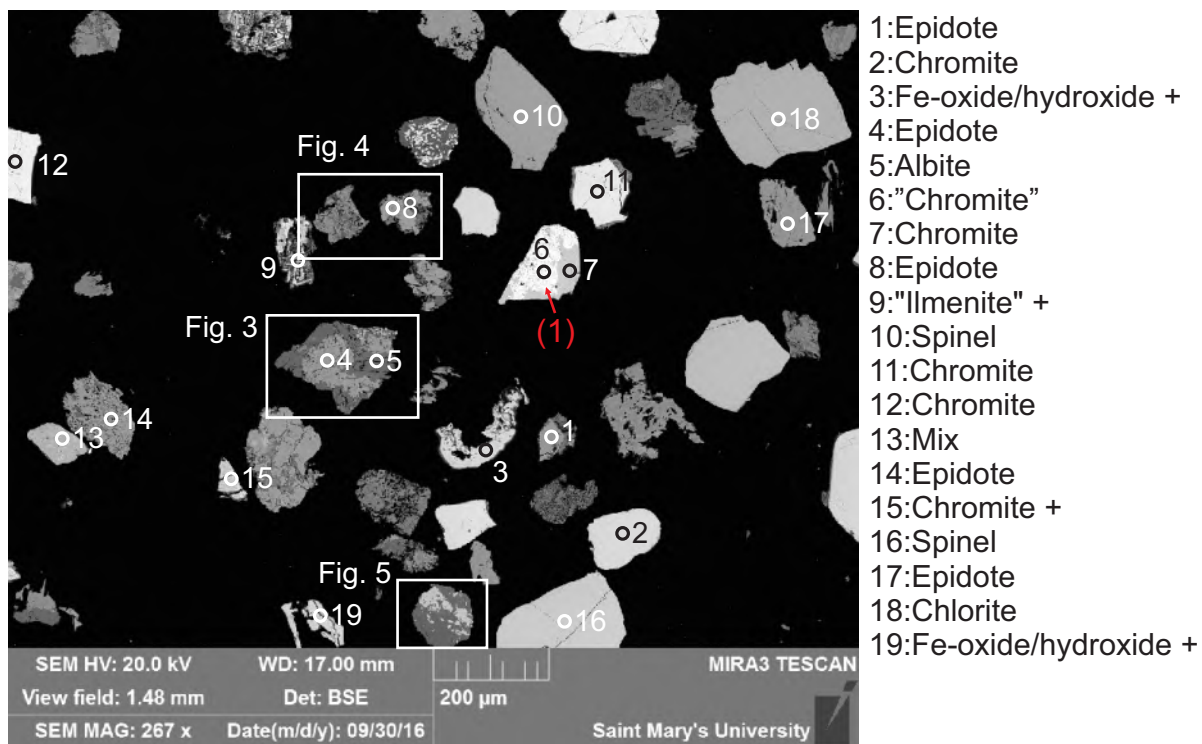

Figure B9.2: Sample S17 site 1 (SEM). 1: Lithic clast (Fe-oxide/hydroxide + chromite, ophiolite).

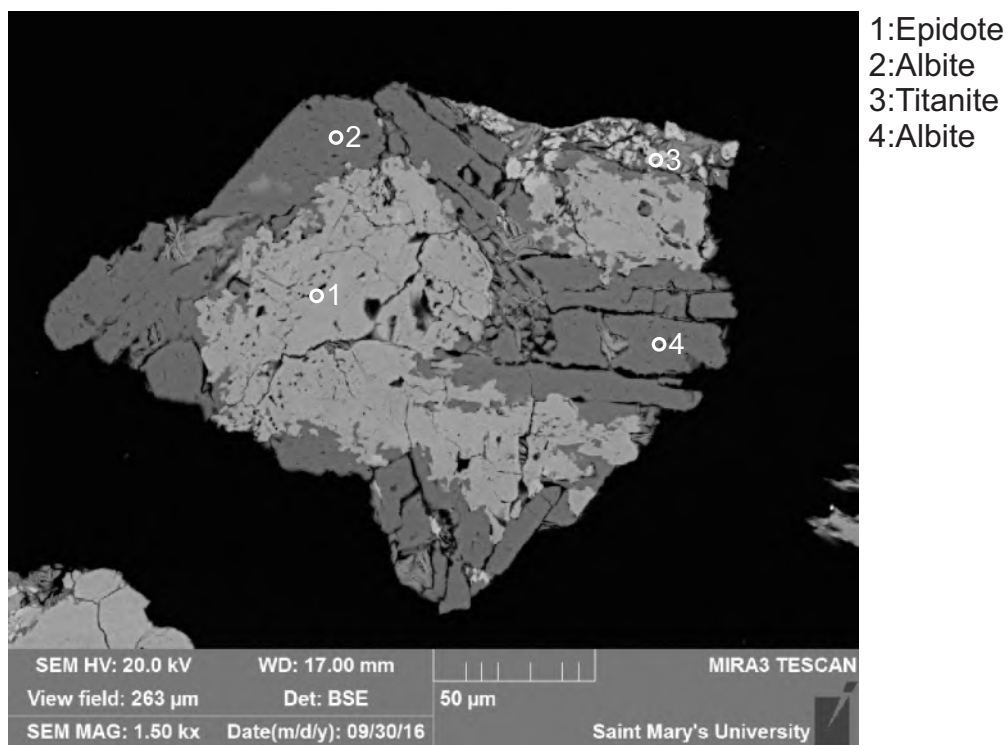

Figure B9.3: Sample S17 site 1.2 (SEM). Lithic clast (epidote + albite + titanite, hydrothermal vein).



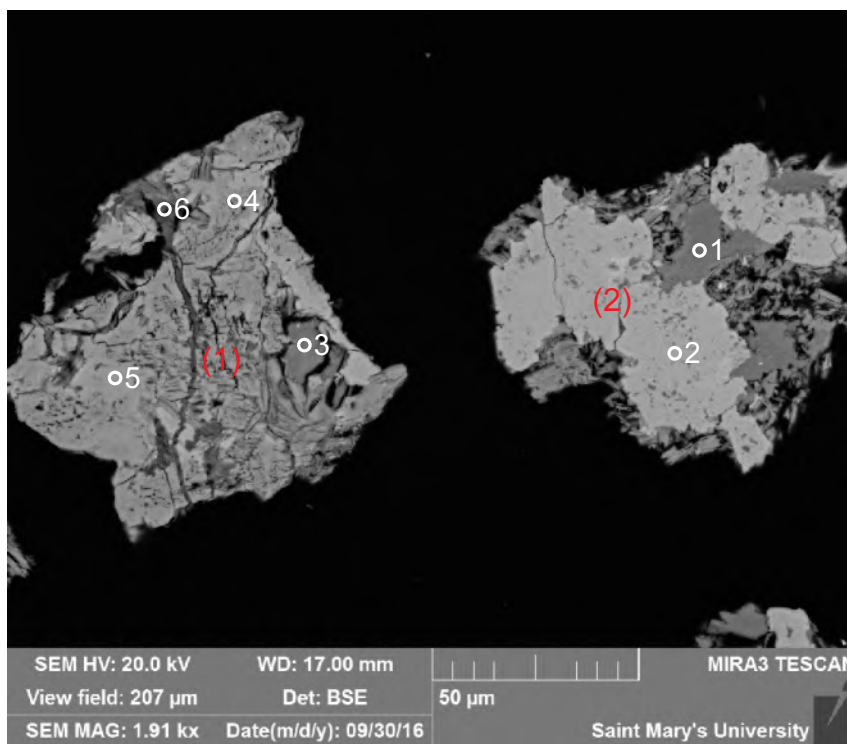

- 1: Quartz
- 2: Epidote
- 3: ?Clay
- 4: Epidote
- 5: Epidote
- 6: ?Clay

Figure B9.4: Sample S17 site 1.3 (SEM). 1: Altered epidote.  
2: Hydrothermal (quartz + epidote).

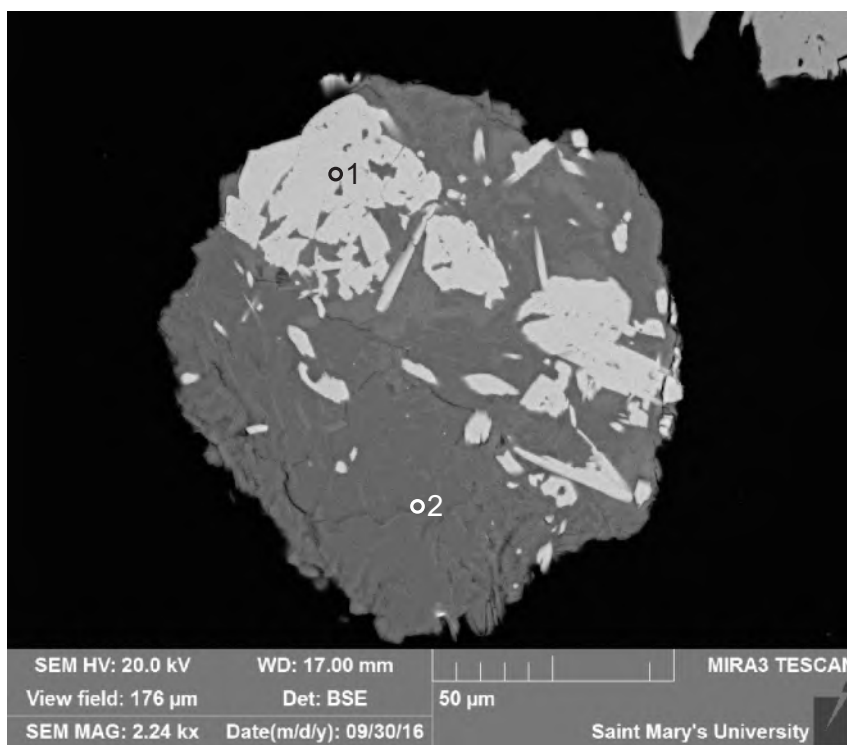

- 1:  $\text{TiO}_2$
- 2: Quartz

Figure B9.5: Sample S17 site 1.4 (SEM). Lithic clast (titania + quartz, metamorphic).

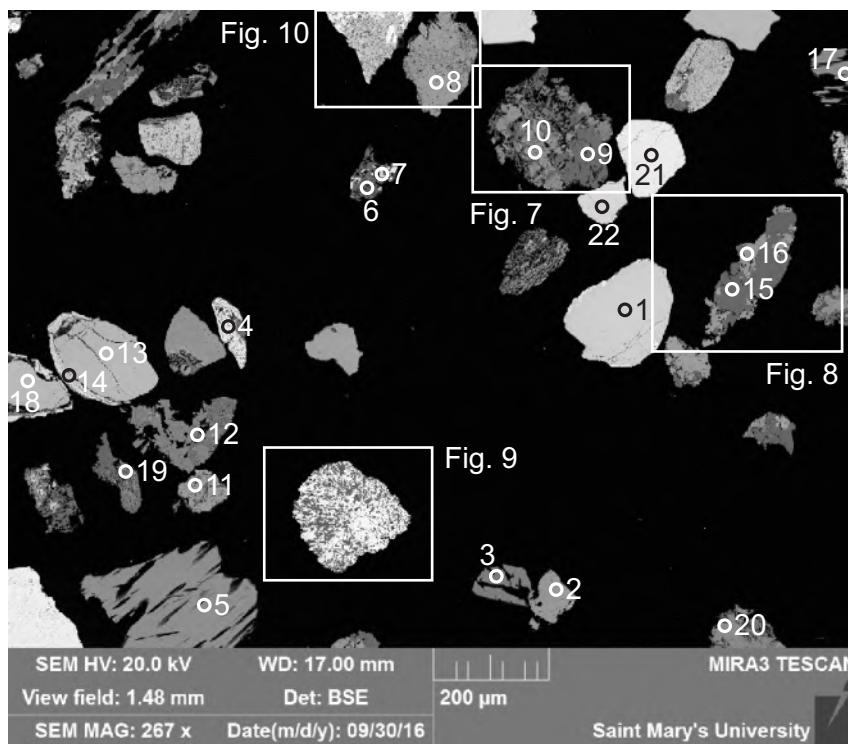

- 1:Chromite
- 2:Epidote
- 3:Hornblende
- 4:"Ilmenite"
- 5:Clinopyroxene
- 6:Albite + Chlorite
- 7:Ilmenite +
- 8:Epidote
- 9:Albite
- 10:Epidote
- 11:Epidote
- 12:Chlorite +
- 13:Garnet
- 14:Fe-oxide/hydroxide +
- 15:Quartz
- 16:Epidote
- 17:Clinopyroxene
- 18:Garnet
- 19:Andensine
- 20:Epidote
- 21:Chromite
- 22:Chromite

Figure B9.6: Sample S17 site 2 (SEM).

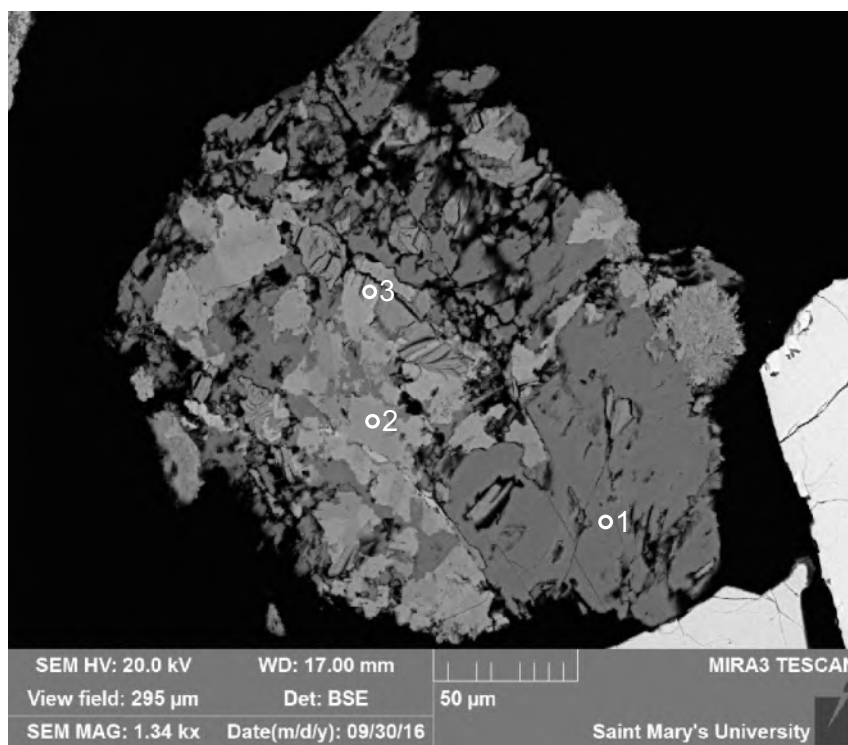

- 1:Albite
- 2:Epidote
- 3:Epidote

Figure B9.7: Sample S17 site 2.2 (SEM). Lithic clast (albite + epidote, hydrothermal vein).

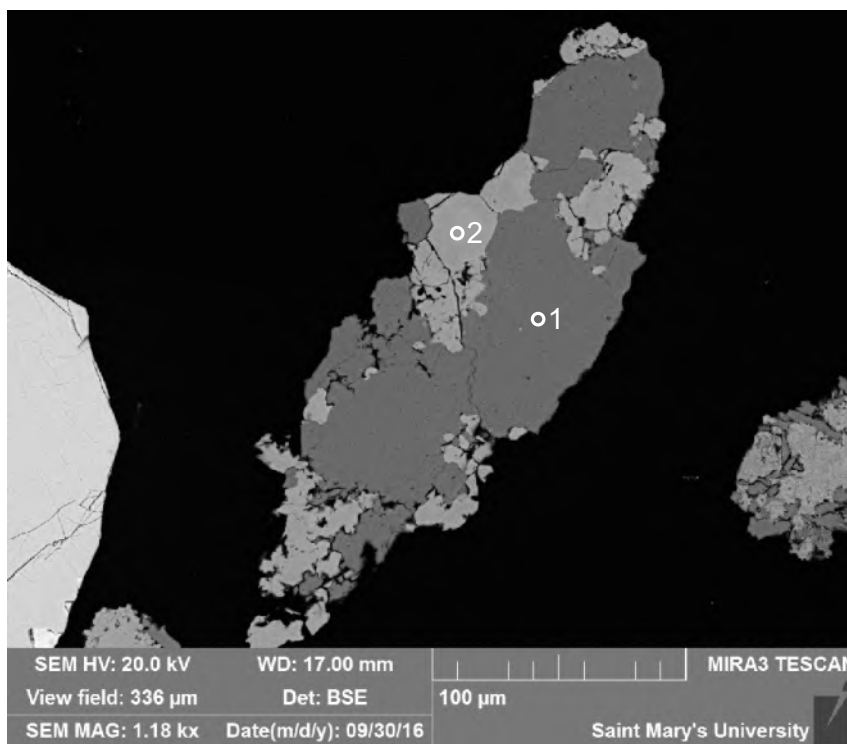

1:Quartz  
2:Epidote

Figure B9.8: Sample S17 site 2.3 (SEM). Hydrothermal quartz + epidote.

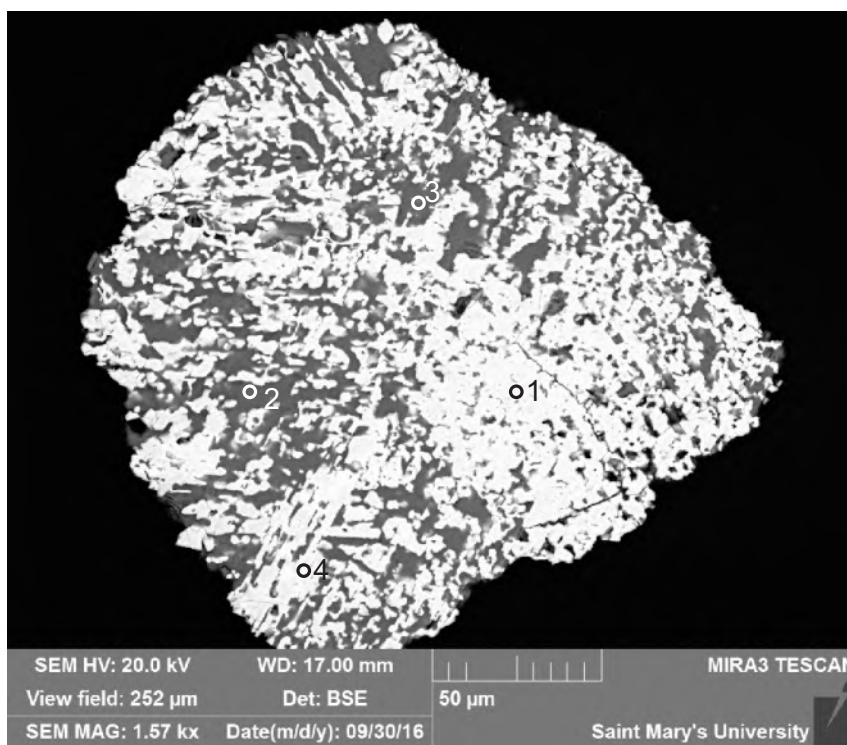

1:Chromite  
2:Cr-Chlorite  
3:Cr-Chlorite  
4:Chromite

Figure B9.9: Sample S17 site 2.4 (SEM). Lithic clast (Cr-chlorite + chromite, metaophiolite).

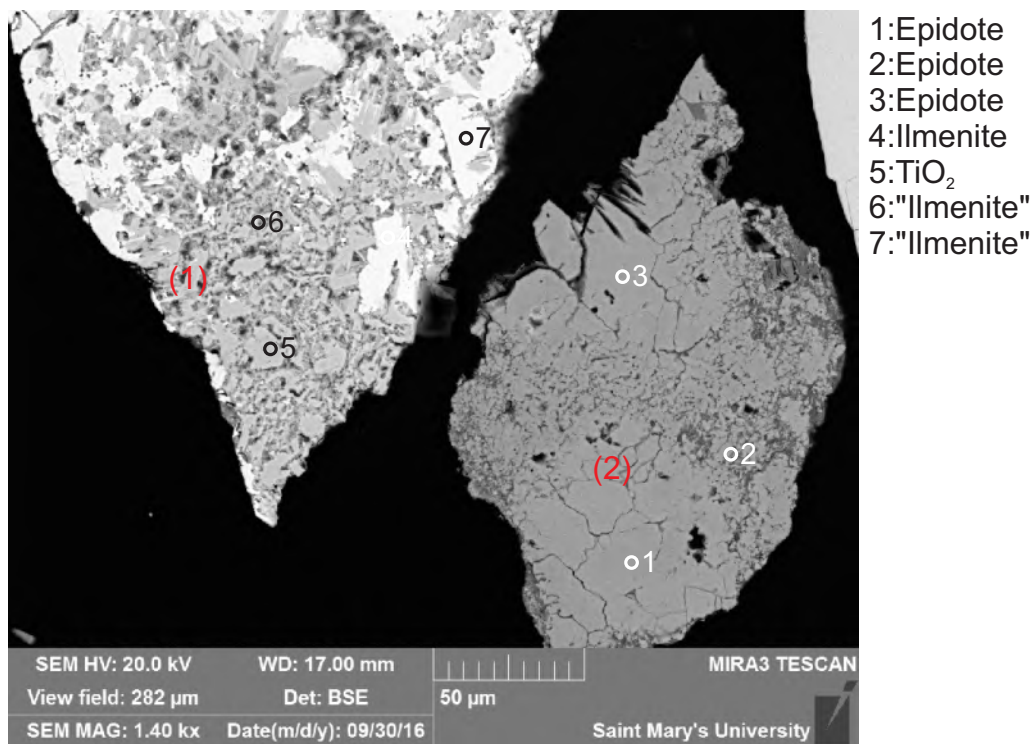

Figure B9.10: Sample S17 site 2.5 (SEM). 1: Altered ilmenite grain. 2: Epidote grain.

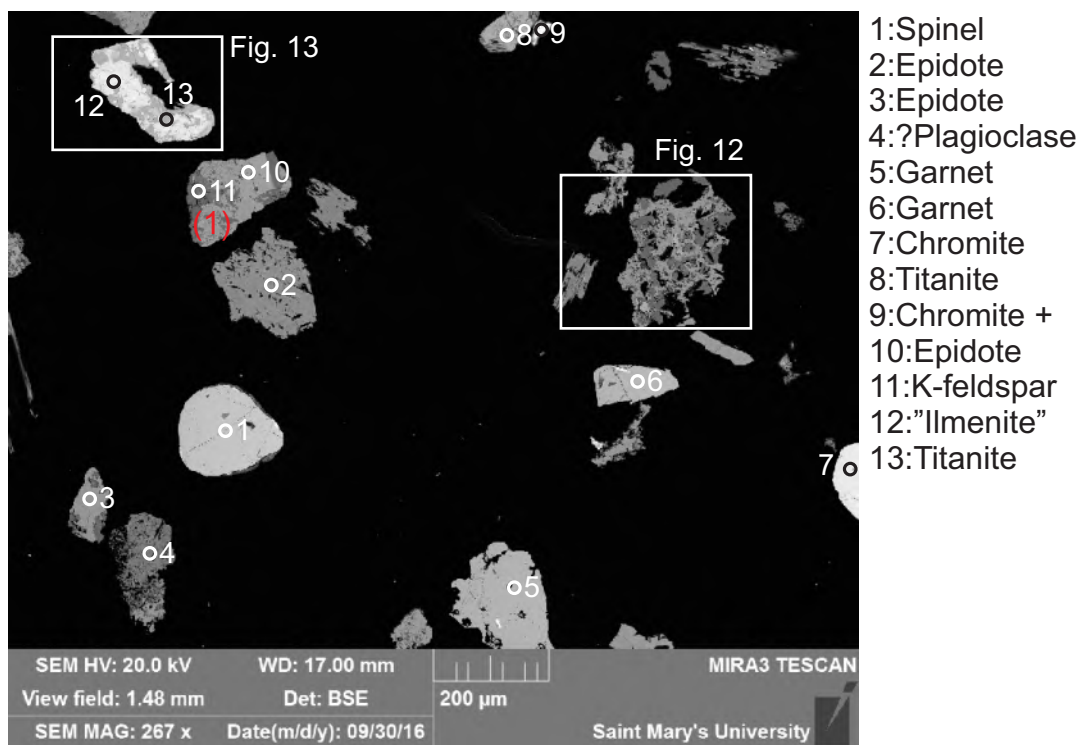

Figure B9.11: Sample S17 site 3 (SEM). 1: Lithic clast (K-feldspar + epidote, hydrothermal vein).



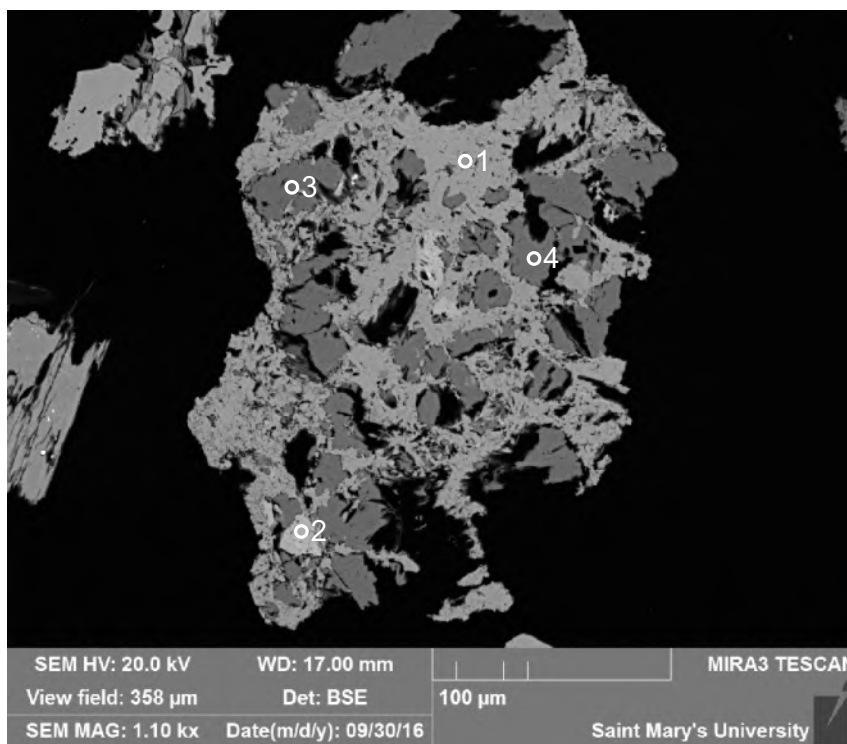

- 1:Epidote
- 2: Titanite
- 3: Albite
- 4: Albite

Figure B9.12: Sample S17 site 3.2 (SEM). Lithic clast (albite + titanite + epidote, hydrothermal).

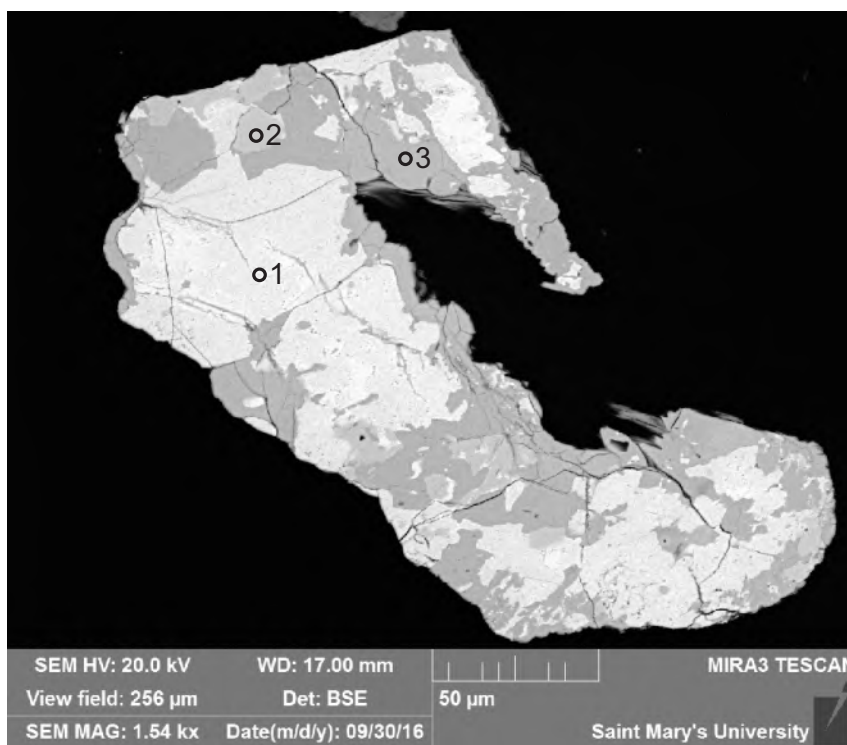

- 1: Ilmenite
- 2:  $\text{TiO}_2$
- 3: Titanite

Figure B9.13: Sample S17 site 3.3 (SEM). Lithic clast (ilmenite + titanite + titania, metamorphic).



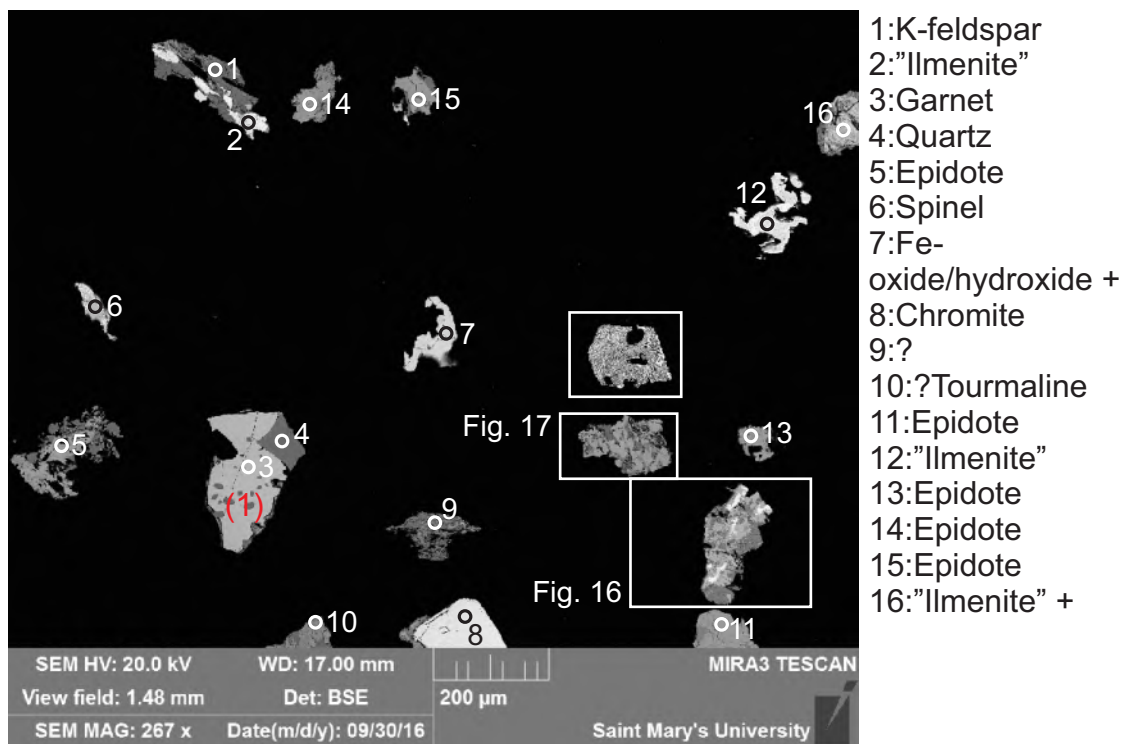

Figure B9.14: Sample S17 site 4 (SEM). 1: Lithic clast (garnet + quartz, metamorphic).

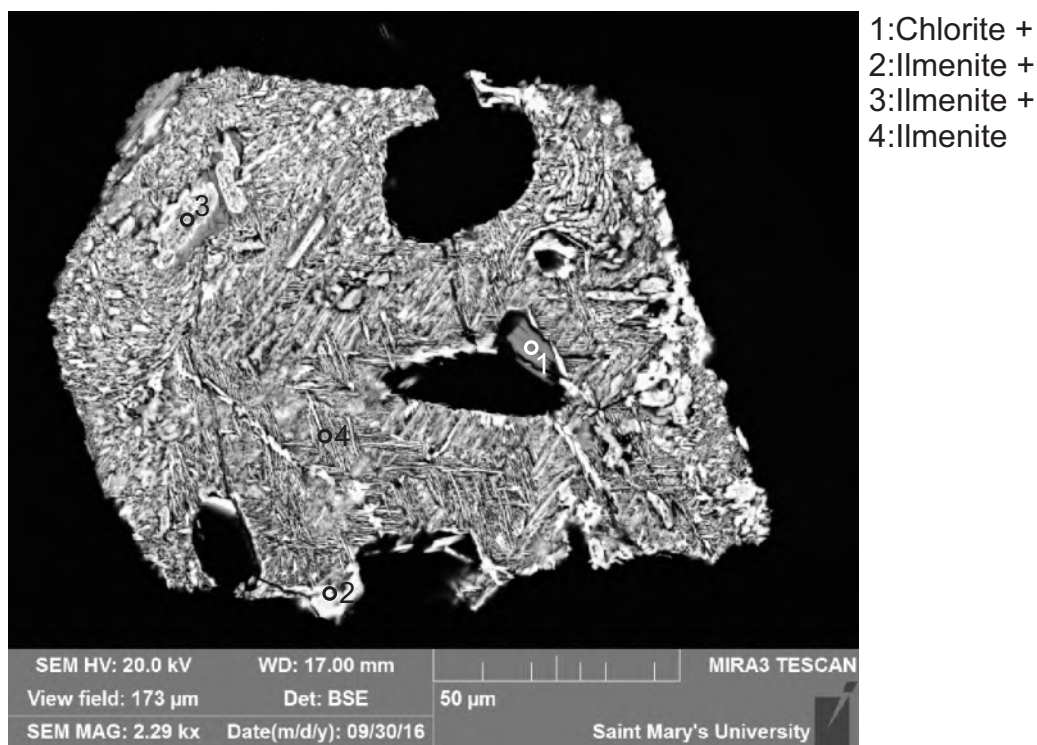

Figure B9.15: Sample S17 site 4.2 (SEM). Altered ilmenite grain.

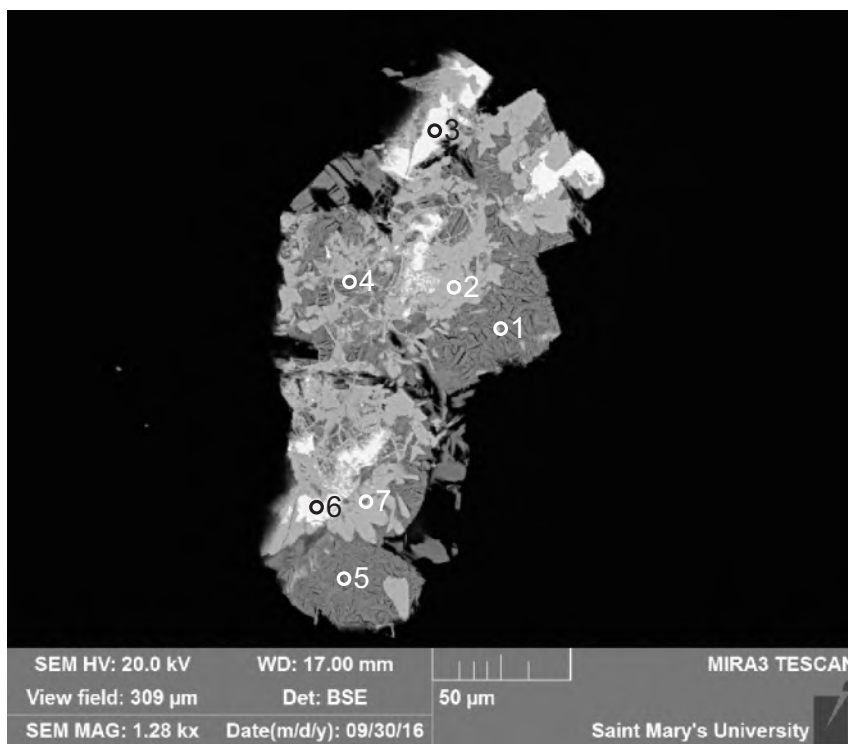

- 1:Chl +
- 2:Titanite
- 3:Ilmenite
- 4:Chlorite +
- 5:Chlorite +
- 6:Ilmenite
- 7:Titanite

Figure B9.16: Sample S17 site 4.3 (SEM). Lithic clast (ilmenite + titanite + chlorite, metamorphic).

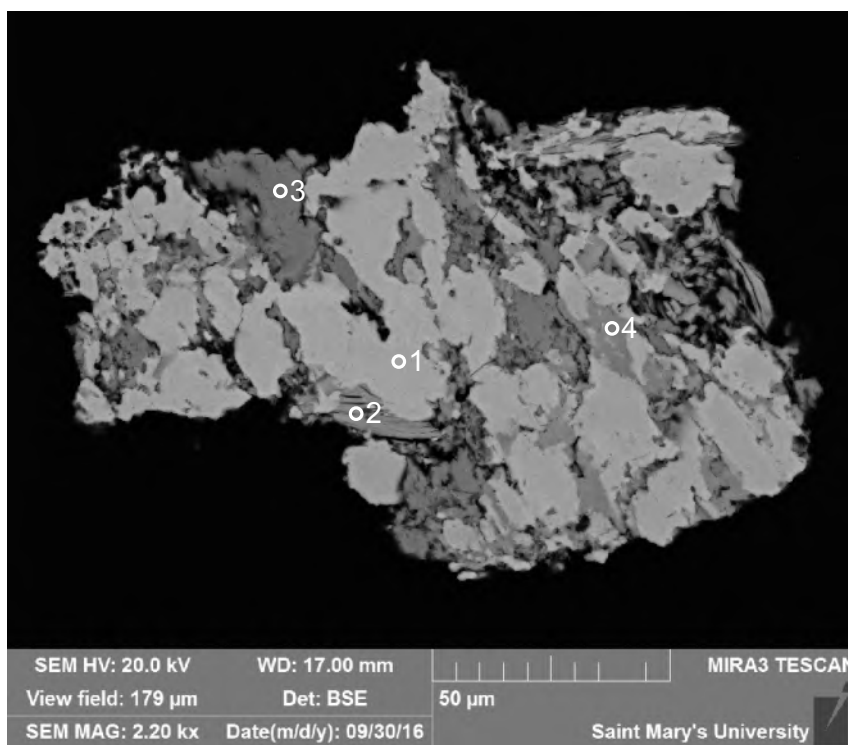

- 1:Epidote
- 2: ?Chlorite +
- 3:Albite
- 4:Muscovite

Figure B9.17: Sample S17 site 4.4 (SEM). Lithic clast (albite + epidote + muscovite, metamorphic).

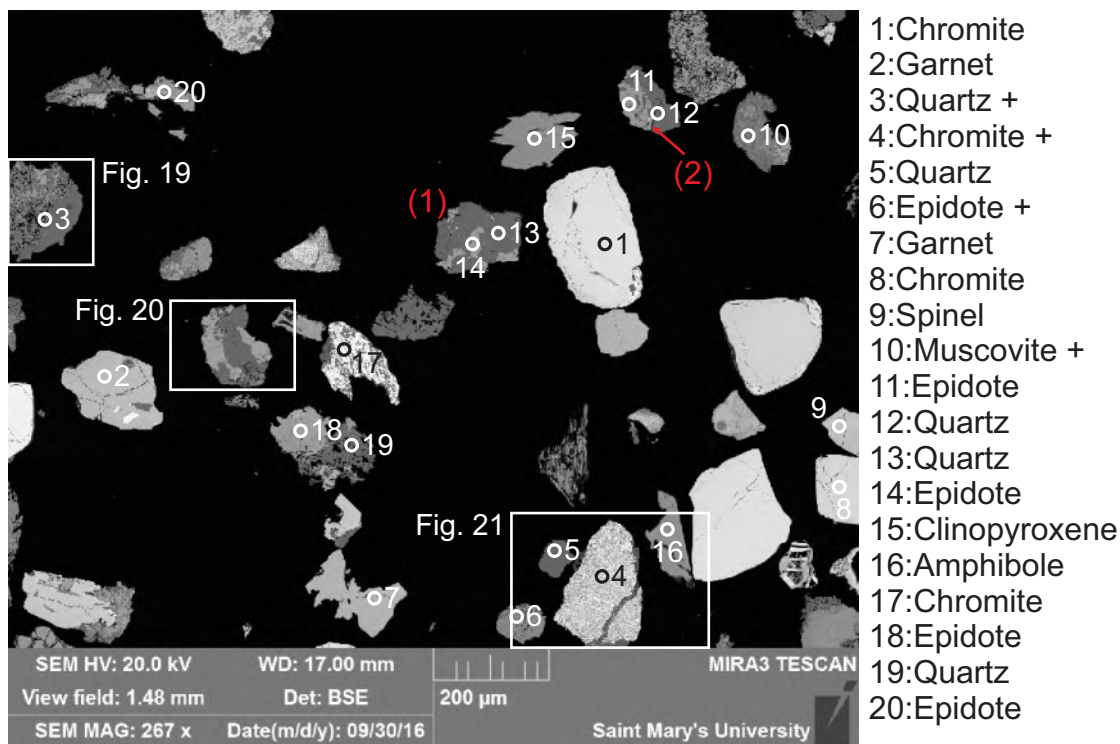

Figure B9.18: Sample S17 site 5 (SEM). 1: Hydrothermal epidote + quartz. 2: Hydrothermal epidote + quartz.

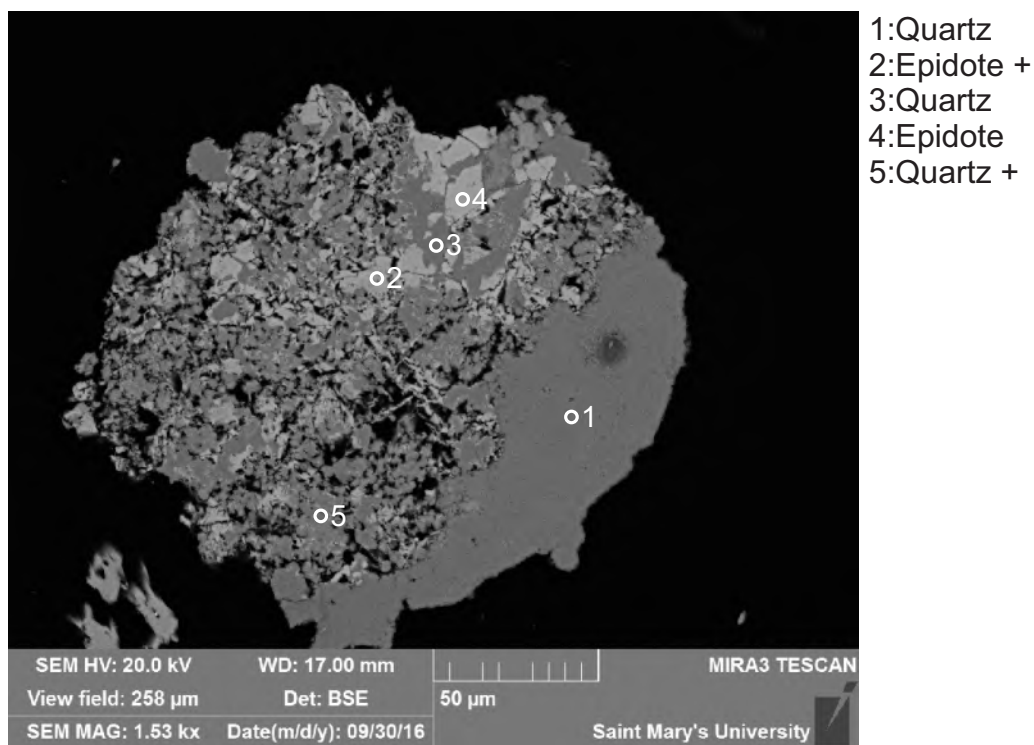

Figure B9.19: Sample S17 site 5.2 (SEM). Partially dissolved quartz + epidote clast, hydrothermal.

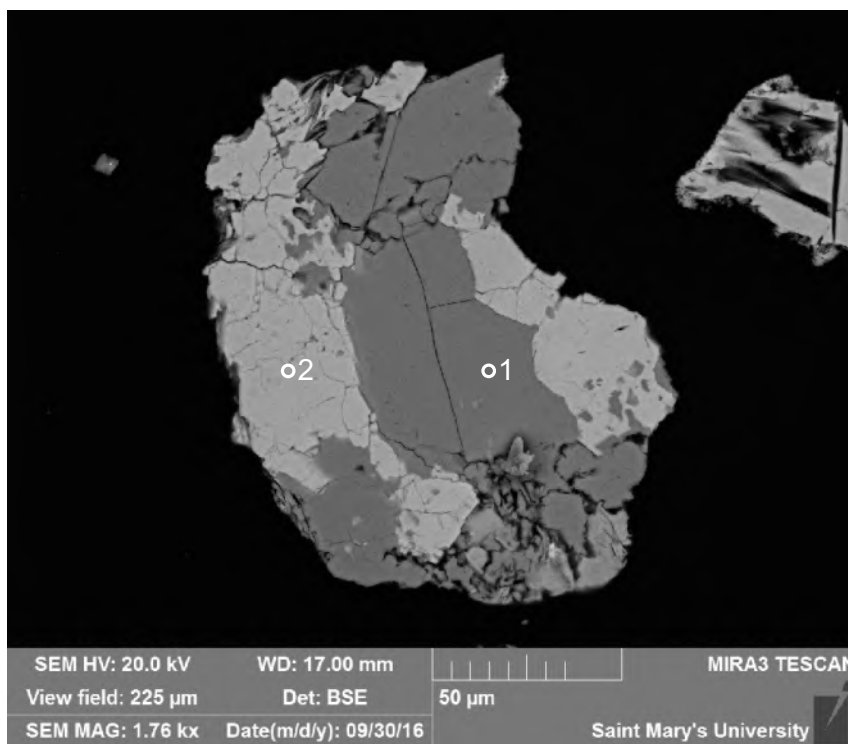

- 1:Quartz
- 2:Epidote

Figure B9.20: Sample S17 site 5.3 (SEM). Lithic clast of hydrothermal quartz + epidote.

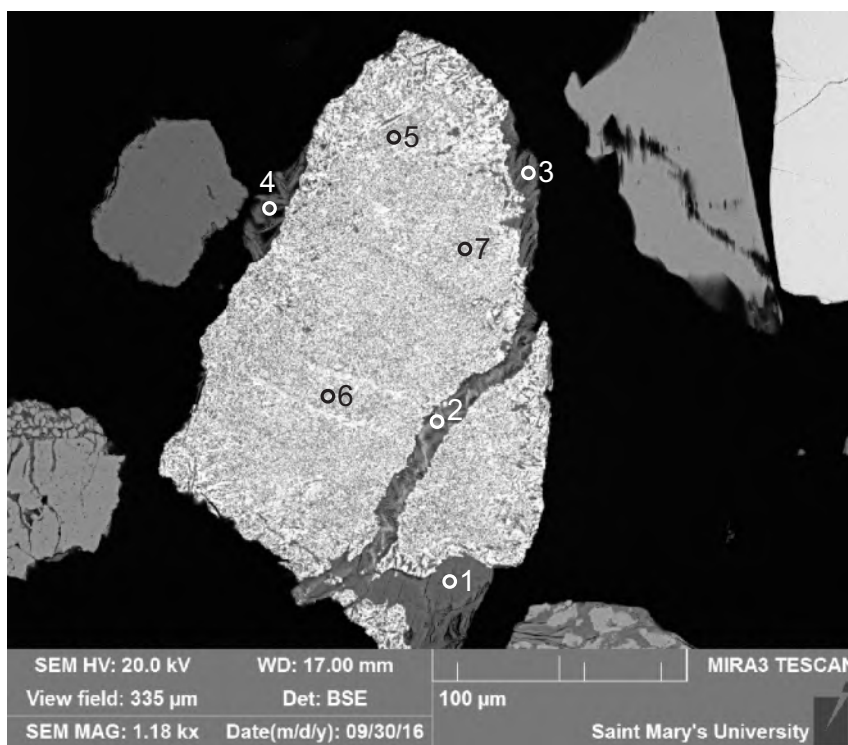

- 1:Cr-Chlorite
- 2:Cr-Chlorite
- 3:Cr-Chlorite
- 4:Cr-Chlorite
- 5:Chromite +
- 6:Chromite +
- 7:Chromite +

Figure B9.21: Sample S17 site 5.4 (SEM). Lithic clast of Cr-chlorite, metaophiolite. Chromite probably has disseminated Cr-chlorite.



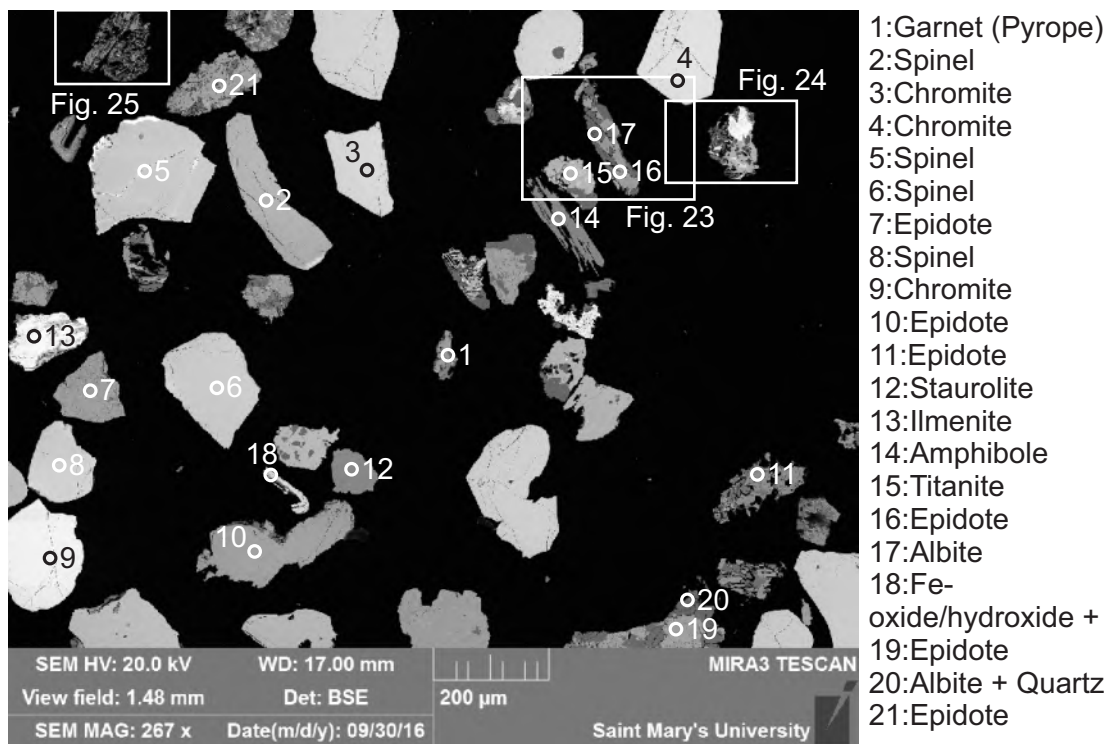

Figure B9.22: Sample S17 site 6 (SEM).

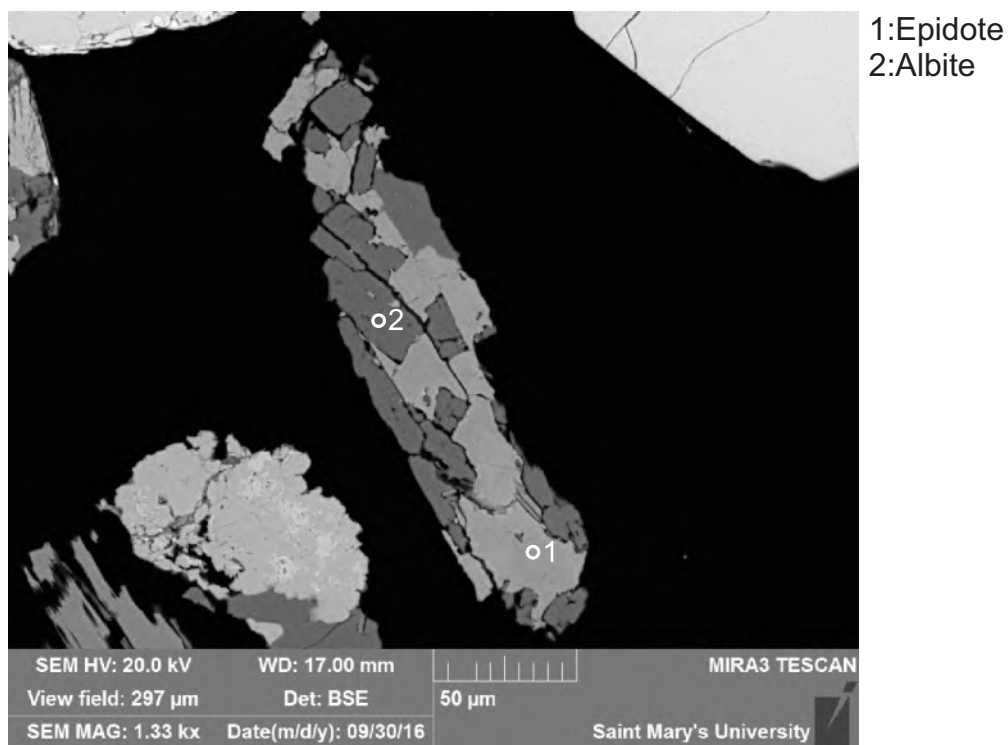

Figure B9.23: Sample S17 site 6.2 (SEM). Lithic clast of hydrothermal epidote + quartz.



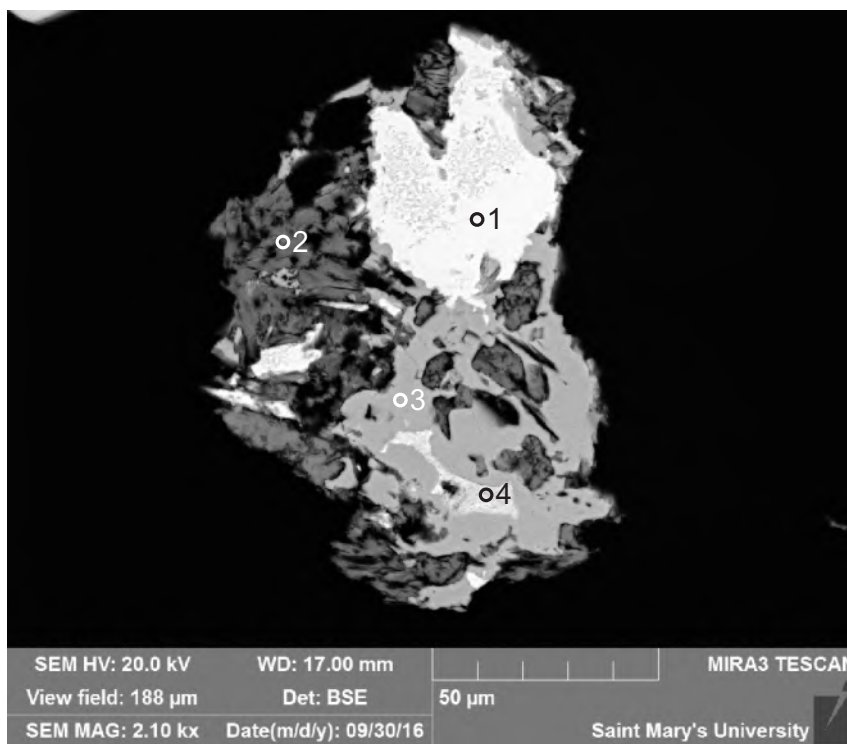

- 1:Ilmenite
- 2:Clay
- 3:Titanite
- 4:"Ilmenite"

Figure B9.24: Sample S17 site 6.3 (SEM). Lithic clast (ilmenite + titanite + unknown mineral (2) or mixture of chlorite + kaolinite).

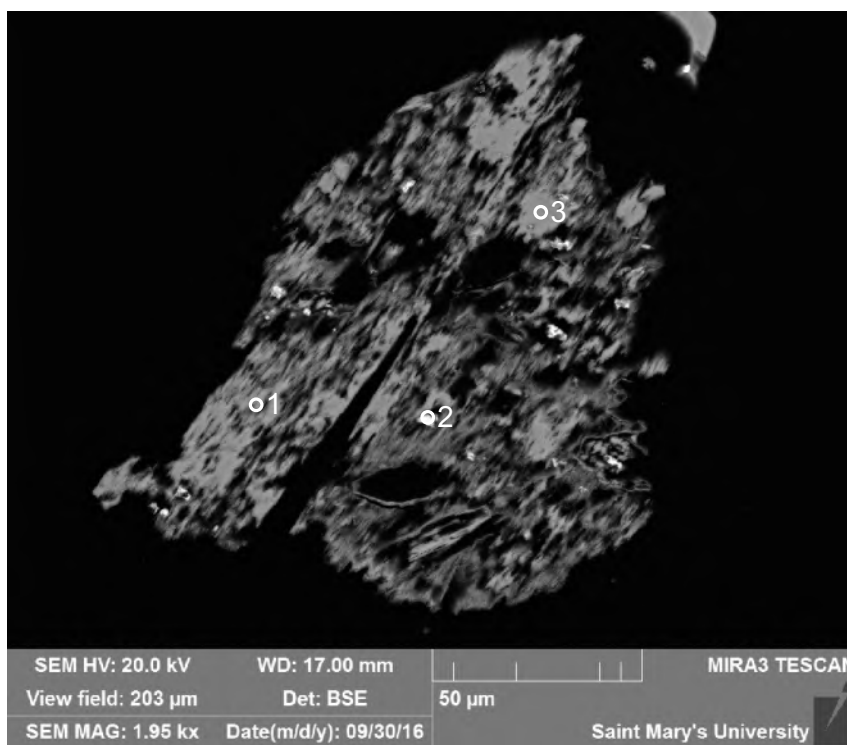

- 1:Amphibole
- 2:Spinel +
- 3:Amphibole

Figure B9.25: Sample S17 site 6.4 (SEM). Lithic clast (amphibole + spinel, metamorphic).

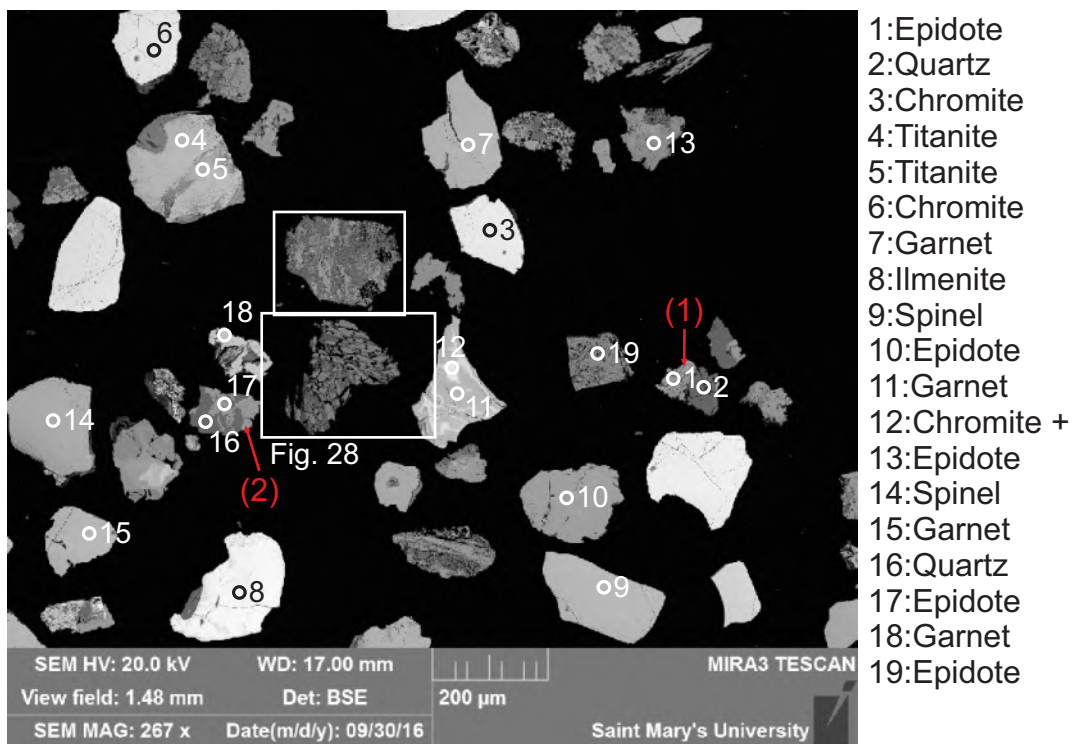

Figure B9.26: Sample S17 site 7 (SEM). Lithic clasts (1,2) of hydrothermal epidote + quartz.

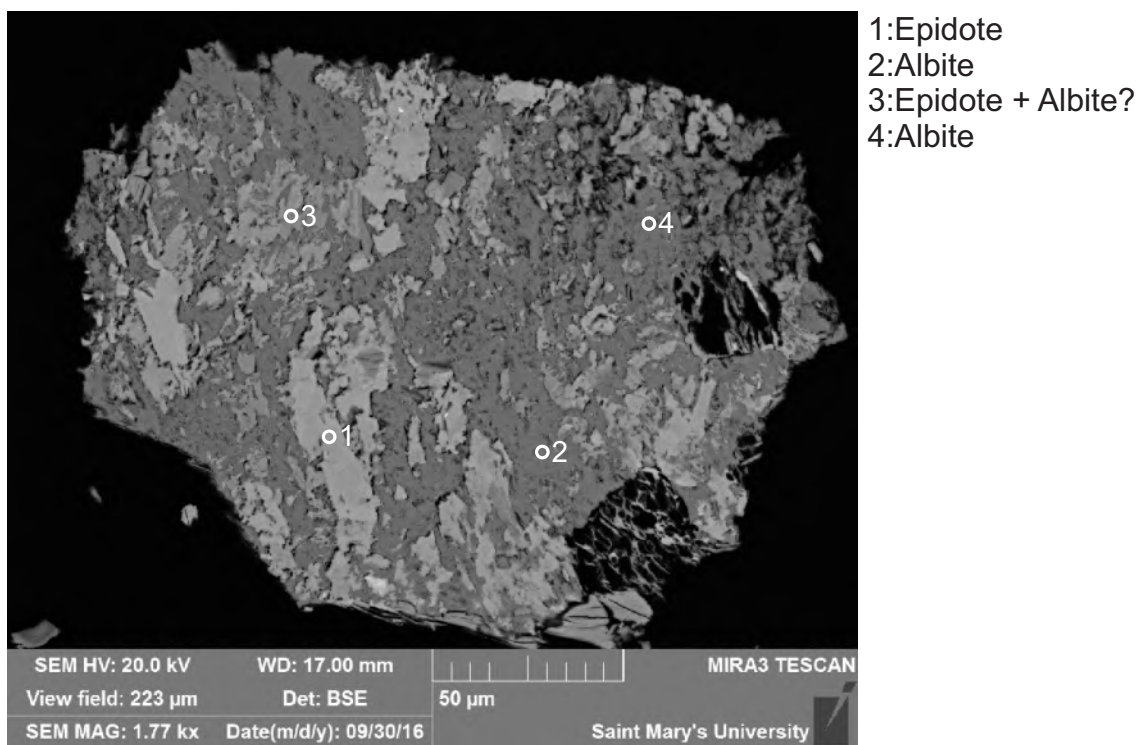

Figure B9.27: Sample S17 site 7.2 (SEM). Lithic clast (epidote + albite, hydrothermal).

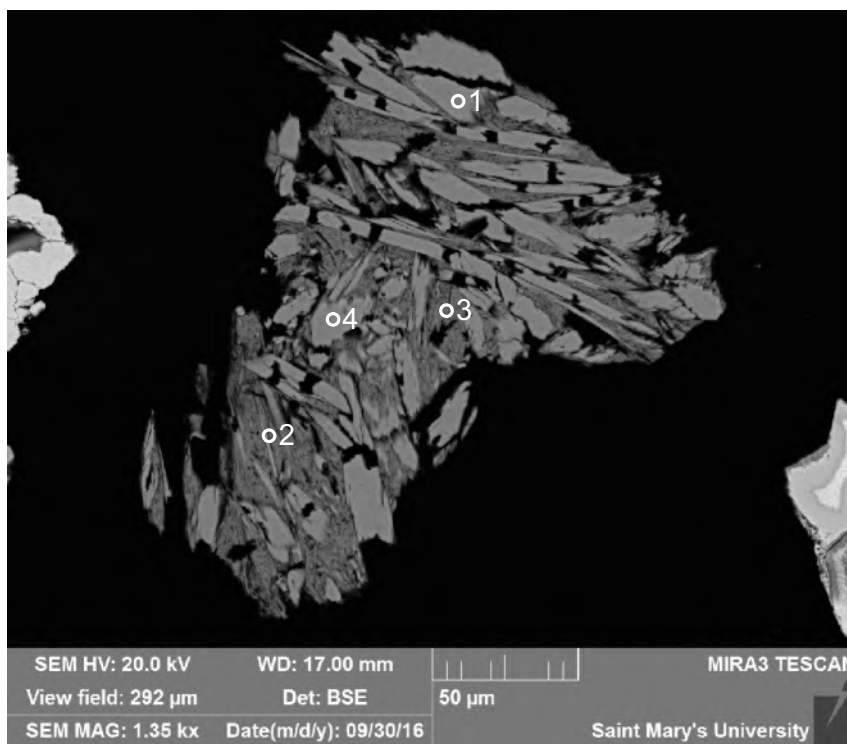

- 1:Talc
- 2:Talc
- 3:Talc
- 4:Amphibole

Figure B9.28: Sample S17 site 7.3 (SEM). Lithic clast of foliated talc + amphibole, metaophiolite.

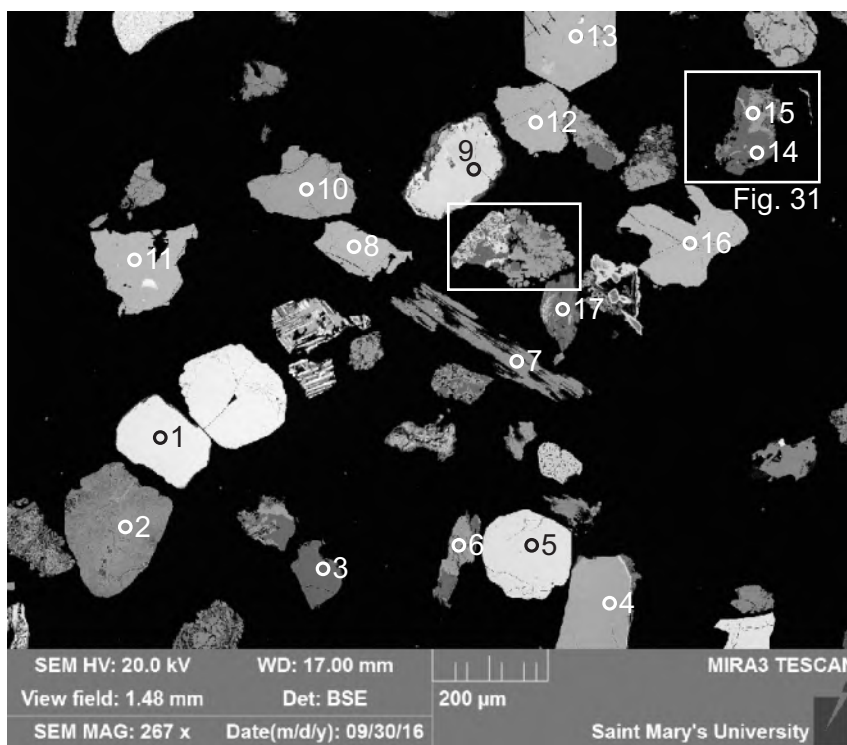

- 1:Chromite
- 2:Epidote
- 3:Quartz
- 4:Spinel
- 5:Chromite
- 6:Epidote +
- 7:Amphibole
- 8:Garnet
- 9:Chromite
- 10:Garnet +
- 11:Garnet
- 12: ?Epidote
- 13:Garnet
- 14:Quartz
- 15:Epidote
- 16:Garnet
- 17:Quartz

Figure B9.29: Sample S17 site 8 (SEM).

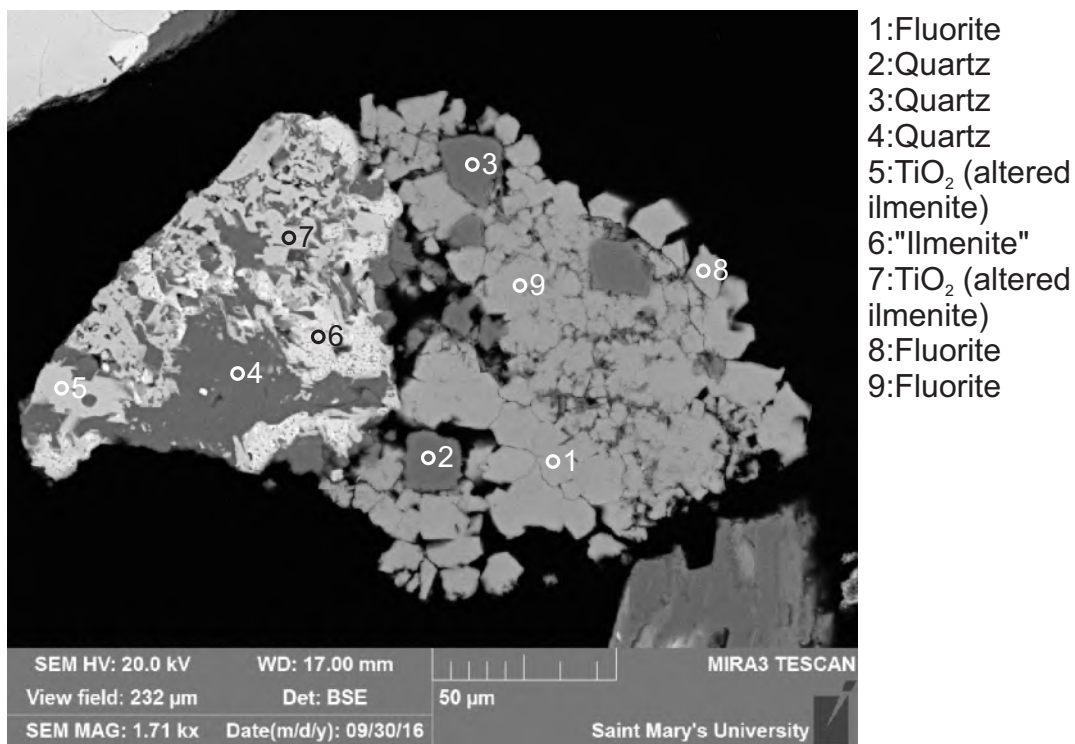

Figure B9.30: Sample S17 site 8.2 (SEM). Lithic clast (fluorite + quartz + titania + ilmenite, hydrothermal).

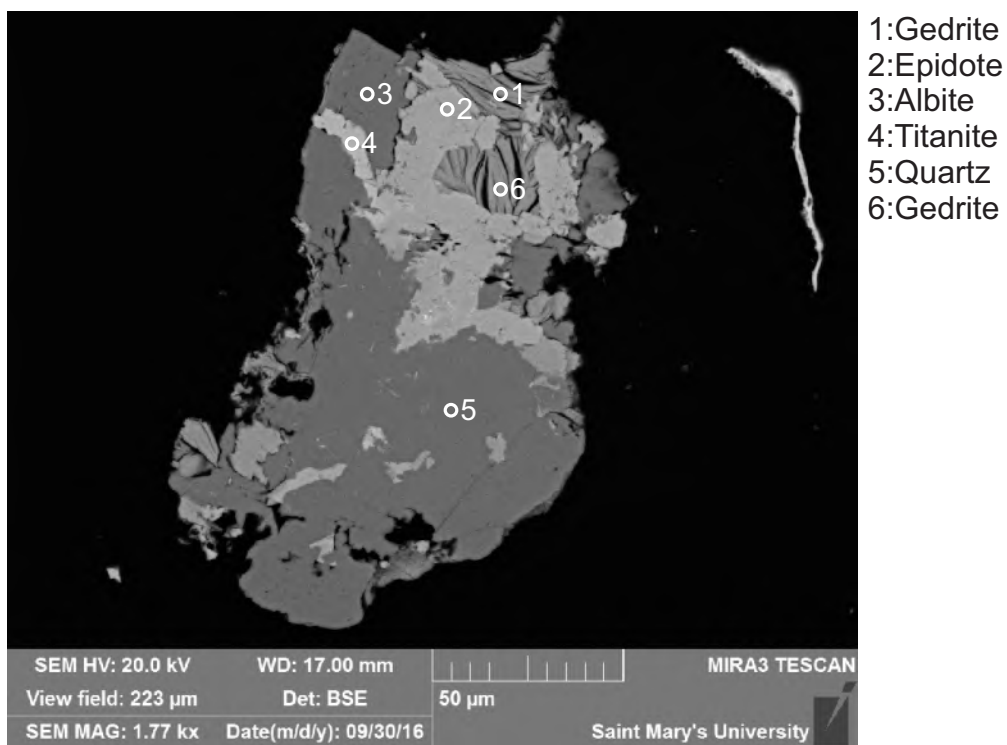

Figure B9.31: Sample S17 site 8.3 (SEM). Lithic clast (quartz + epidote + albite + titanite + gedrite, metamorphic).



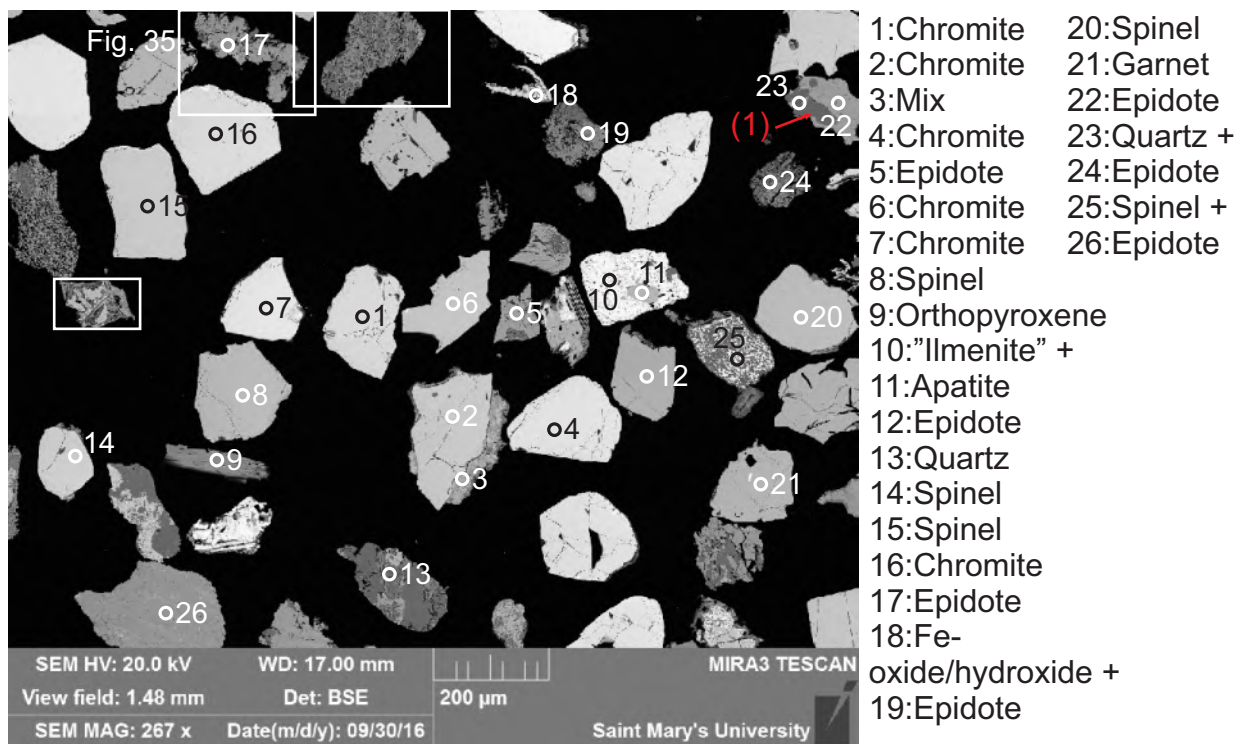

Figure B9.32: Sample S17 site 9 (SEM). 1: Hydrothermal quartz + epidote.

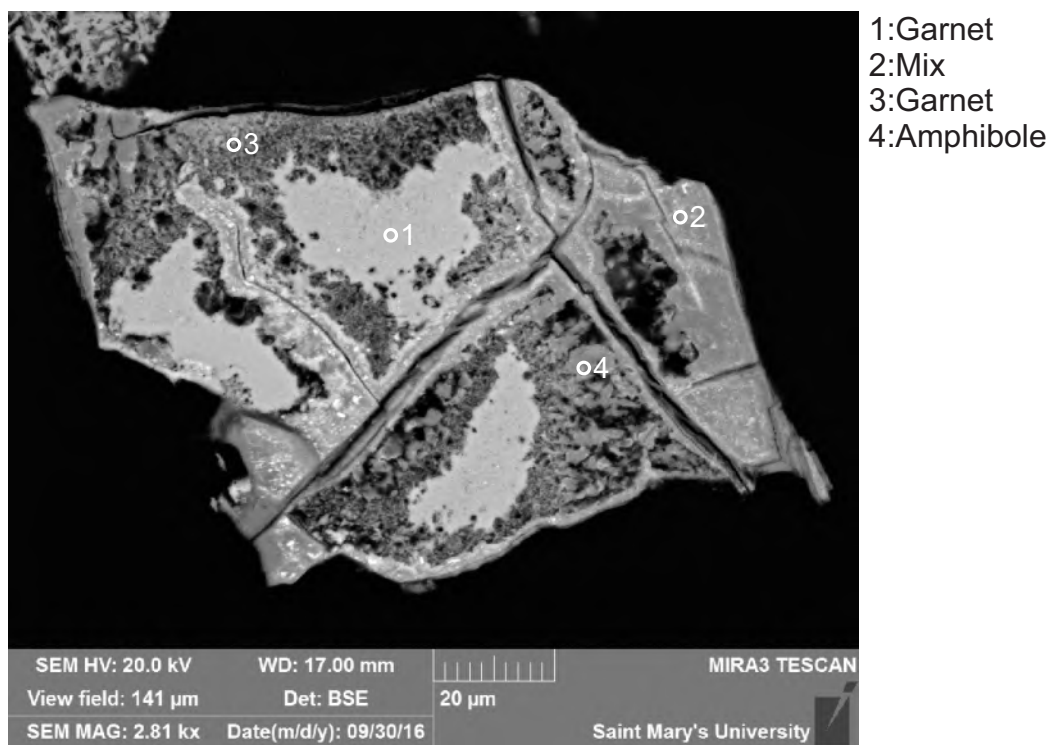

Figure B9.33: Sample S17 site 9.2 (SEM). Garnet crystal partially replaced by amphibole (actinolite).



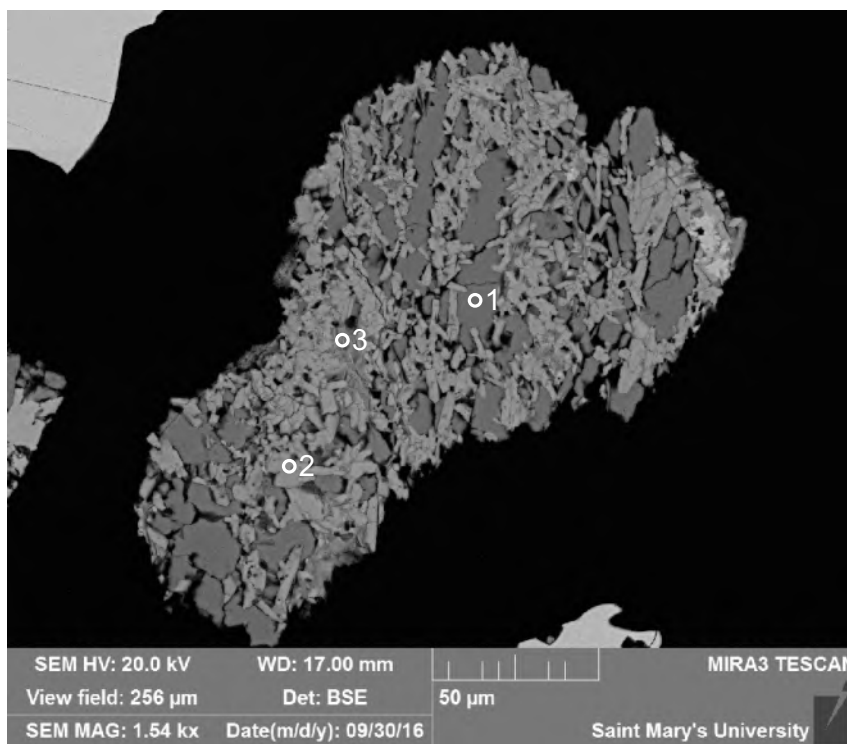

- 1:Albite
- 2:Epidote +
- 3:Gedrite +

Figure B9.34: Sample S17 site 9.3 (SEM). Lithic clast (albite + gedrite + epidote, metamorphic).

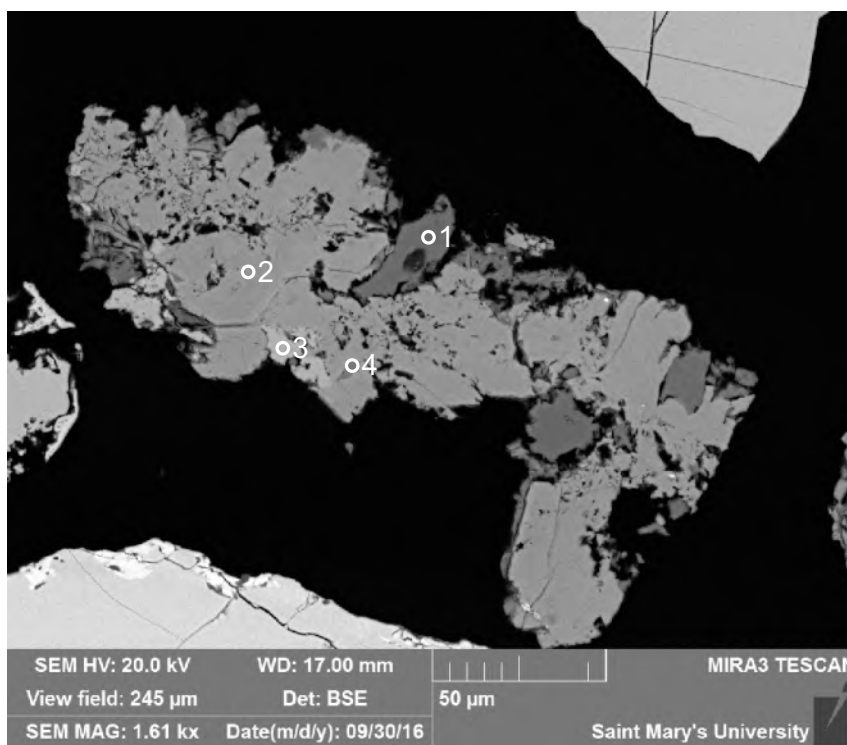

- 1:Albite
- 2:Epidote
- 3:Titanite
- 4:K-feldspar +

Figure B9.35: Sample S17 site 9.4 (SEM). Lithic clast (albite + epidote + K-feldspar + titanite, metamorphic or hydrothermal).

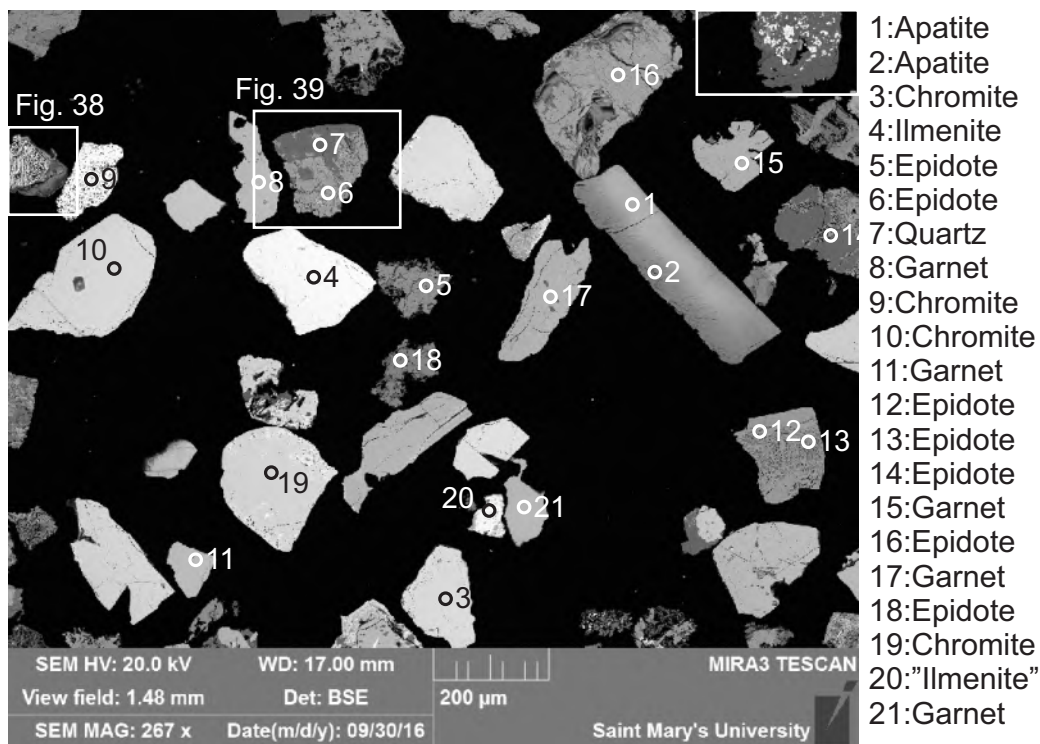

Figure B9.36: Sample S17 site 10 (SEM).

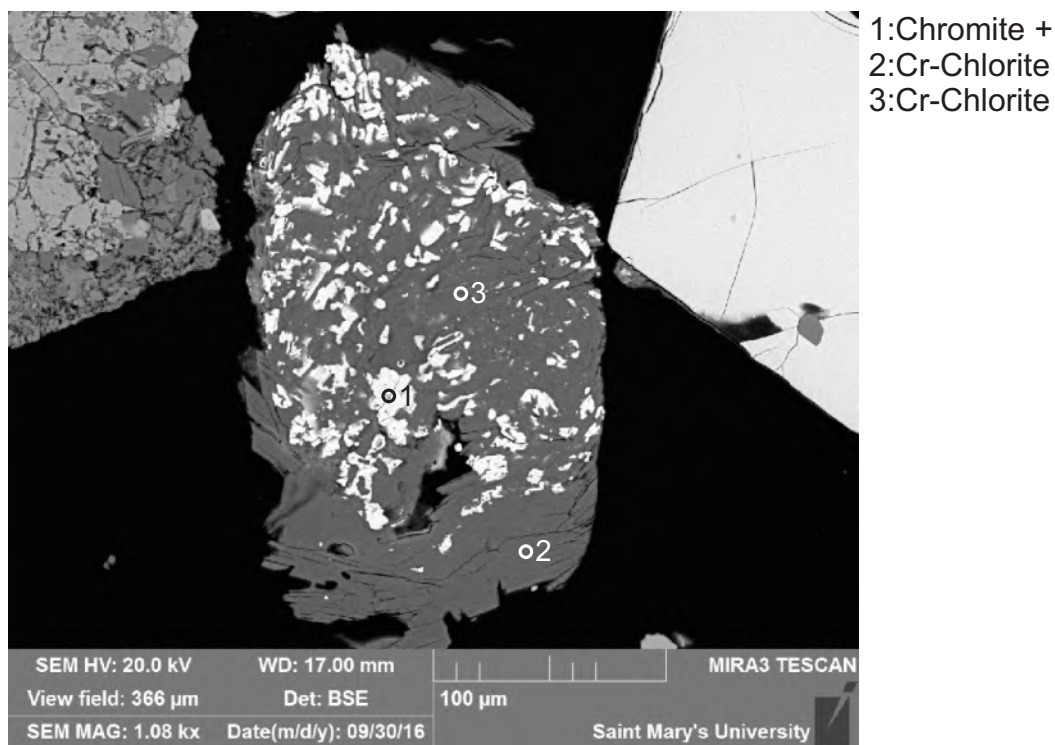

Figure B9.37: Sample S17 site 10.2 (SEM). Chromite grain partially replaced by Cr-chlorite, metaophiolite.

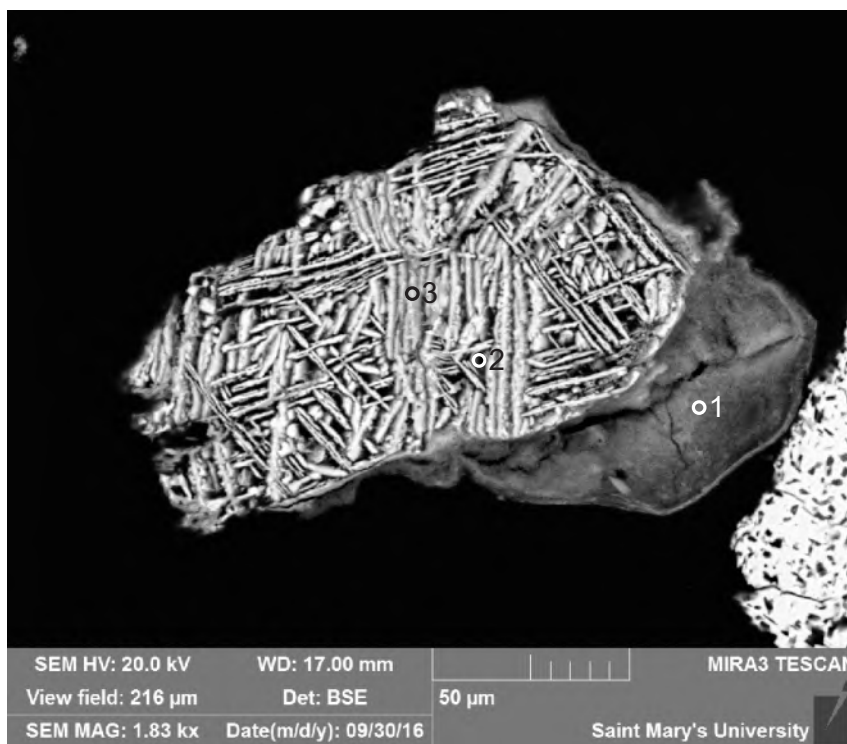

- 1:Mn-oxide/hydroxide +
- 2:Ilmenite +
- 3: Titanite + ?

Figure B9.38: Sample S17 site 10.3 (SEM). Altered ilmenite grain + Mn-oxide/hydroxide around edges of grain.

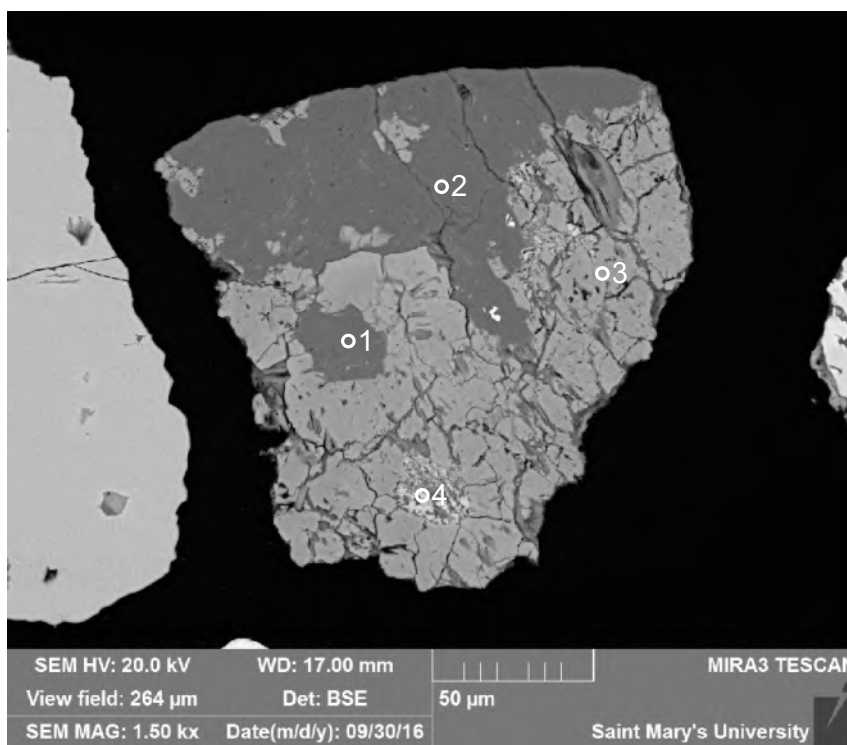

- 1:Quartz
- 2:Quartz
- 3:Epidote
- 4:TiO<sub>2</sub> +

Figure B9.39: Sample S17 site 10.4 (SEM). Lithic clast (quartz + epidote + titania, metamorphic).

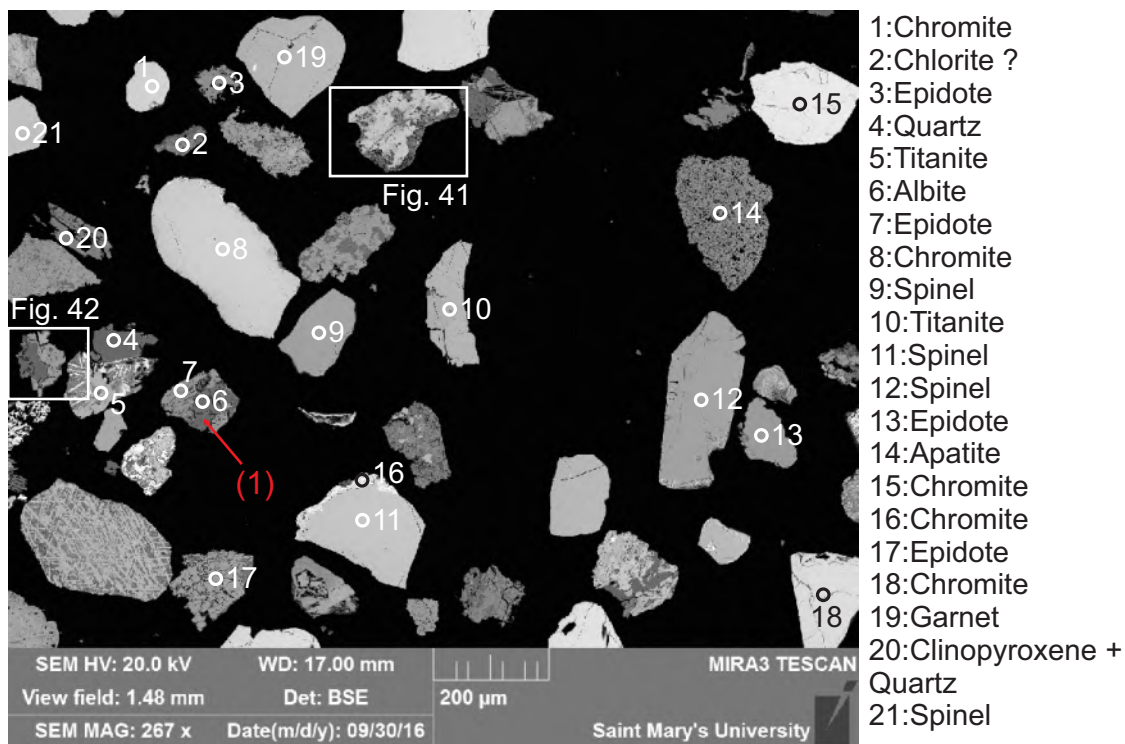

Figure B9.40: Sample S17 site 11 (SEM). 1: Lithic clast (albite + epidote, hydrothermal).

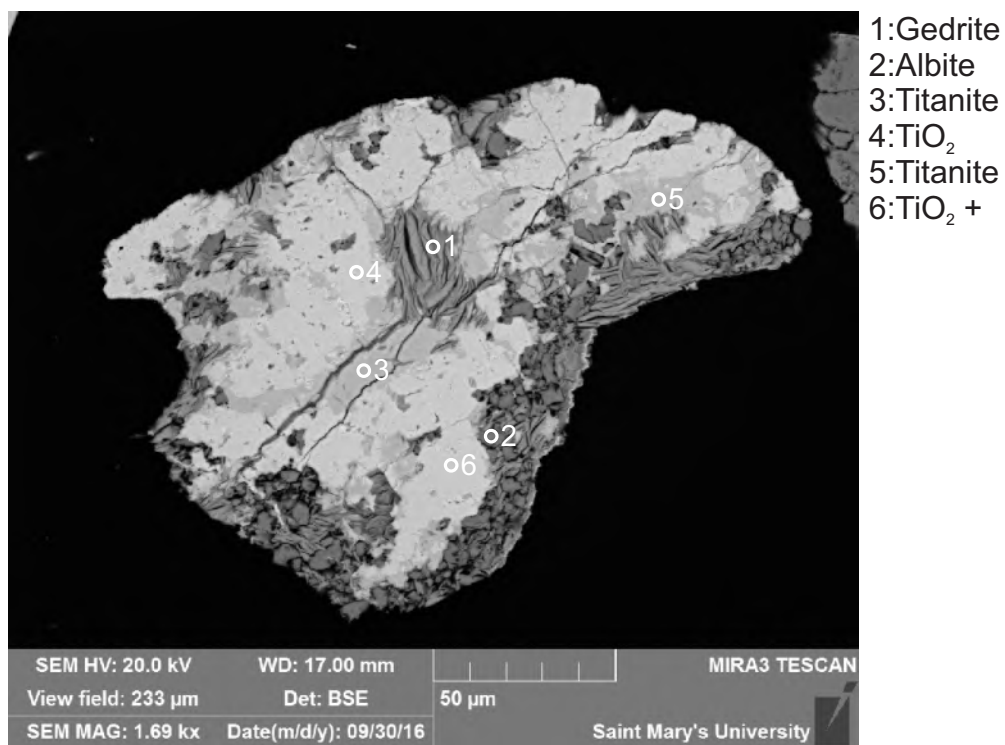

Figure B9.41: Sample S17 site 11.2 (SEM). Lithic clast (albite + titanite + titania + gedrite, retrograde metamorphic).



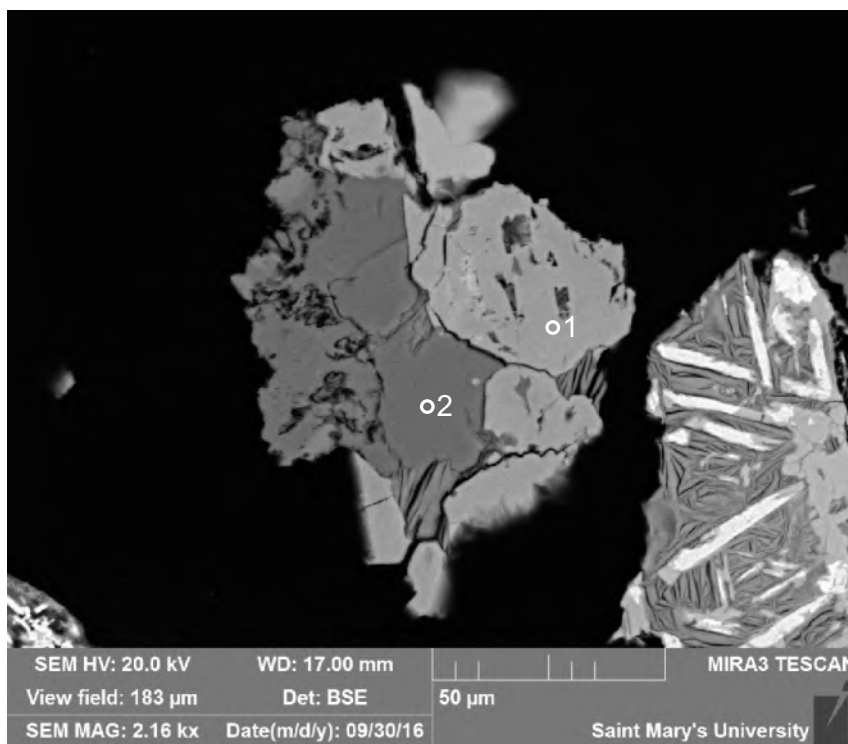

- 1:Epidote
- 2:Quartz

Figure B9.42: Sample S17 site 11.3 (SEM). Lithic clast (quartz + epidote, hydrothermal).

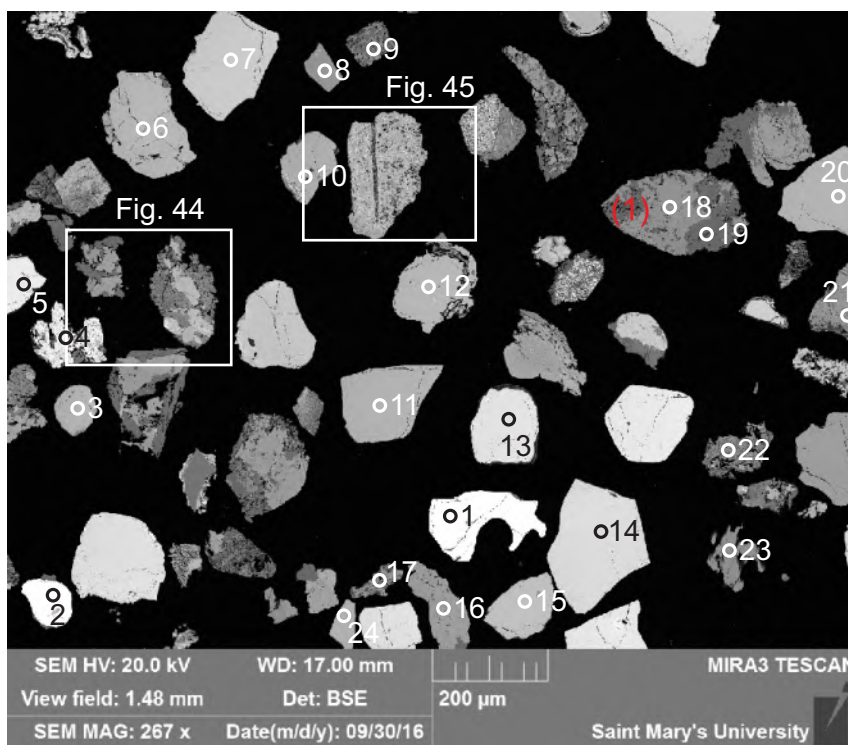

- 1:Zircon
- 2:Zircon
- 3:Spinel
- 4:Ilmenite
- 5:Chromite
- 6:Garnet
- 7:Chromite
- 8:Epidote
- 9:Epdiote + Albite
- 10:Spinel
- 11:Spinel
- 12:Garnet
- 13:Chromite
- 14:Chromite
- 15:Spinel
- 16:Epidote
- 17:Epidote
- 18:Epidote
- 19:Quartz
- 20:Garnet
- 21:Epidote
- 22:Mix
- 23:Amphibole
- 24:Spinel

Figure B9.43: Sample S17 site 12 (SEM). 1: Lithic clast (quartz + epidote, hydrothermal).



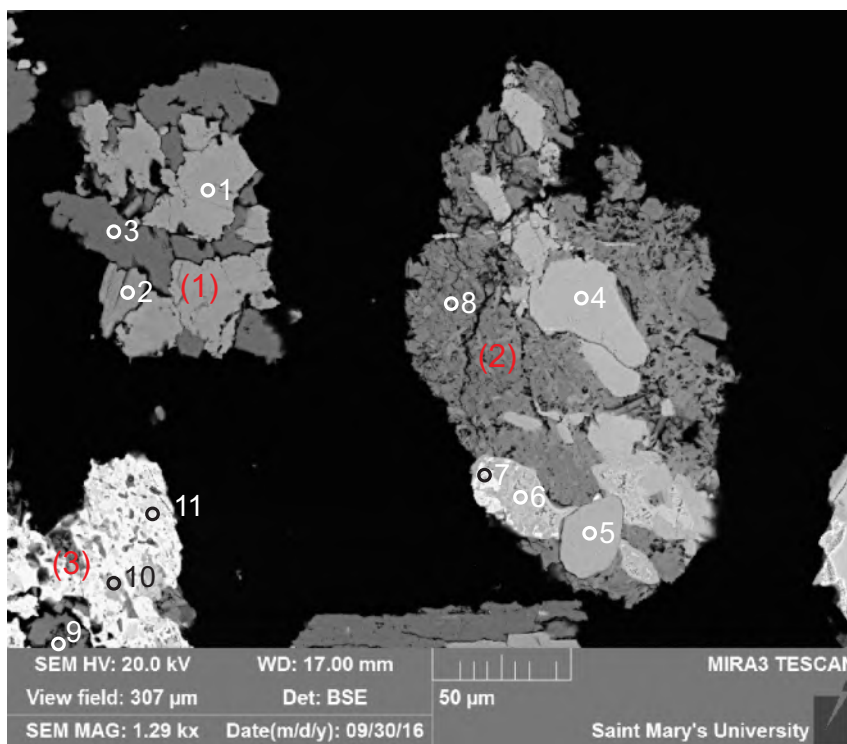

- 1:Epidote
- 2:Gedrite
- 3:Albite
- 4:Titanite
- 5:Apatite
- 6:Titanite +  $\text{TiO}_2$
- 7:"Ilmenite"
- 8:Muscovite +
- 9:Oligoclase
- 10:Titanite +  $\text{TiO}_2$
- 11:Ilmenite

Figure B9.44: Sample S17 site 12.2 (SEM). 1: Lithic clast (epidote + albite + gedrite). 2: Lithic clast (titanite + apatite + ilmenite + muscovite). 3: Lithic clast (oligoclase + altered ilmenite).

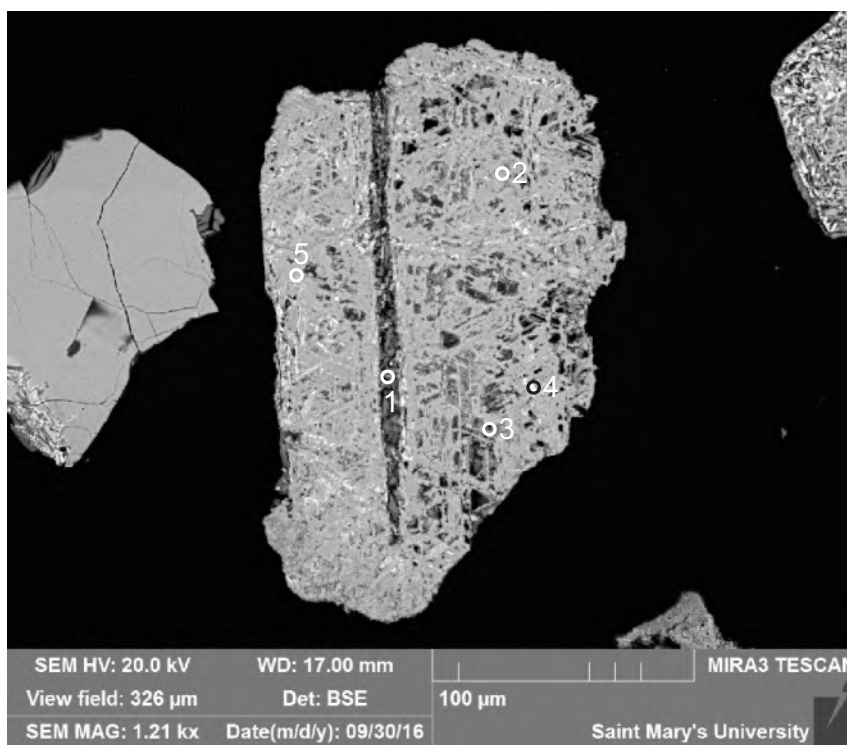

- 1:Amphibole +
- 2:Titanite +
- 3:Titanite +  $\text{TiO}_2$  +
- 4:Ilmenite +
- 5:Titanite

Figure B9.45: Sample S17 site 12.3 (SEM). Altered ilmenite grain. Metamorphic.

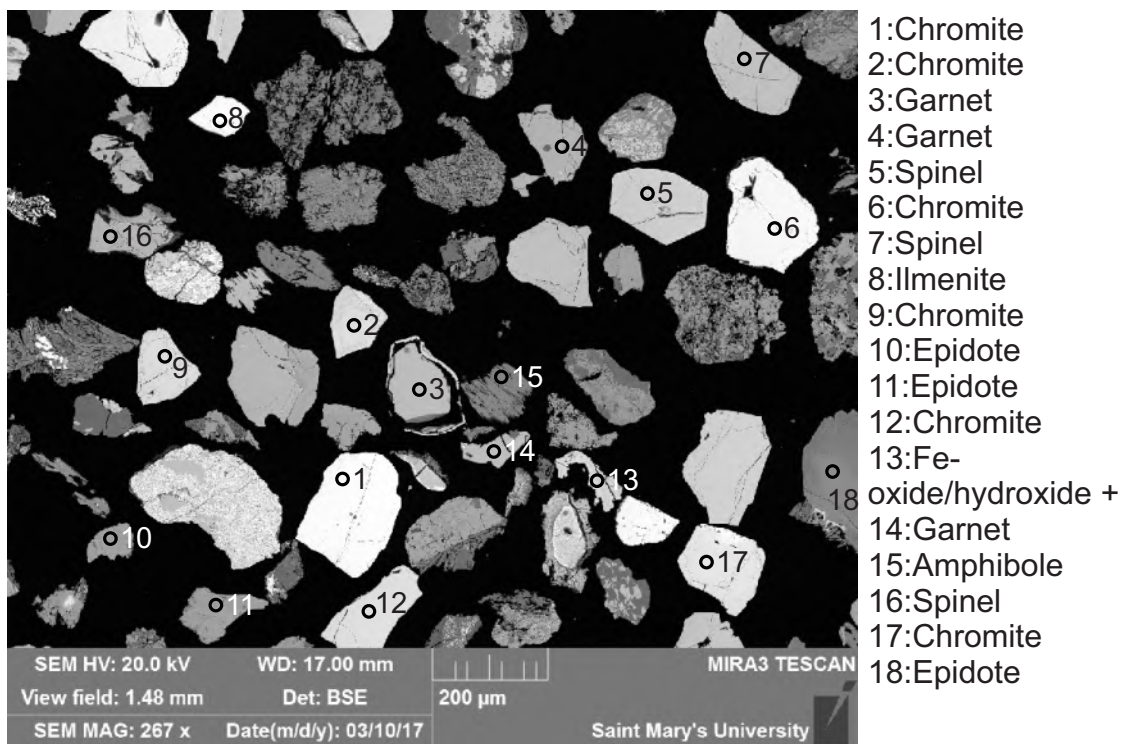

Figure B9.46: Sample S17 site 13 (SEM).

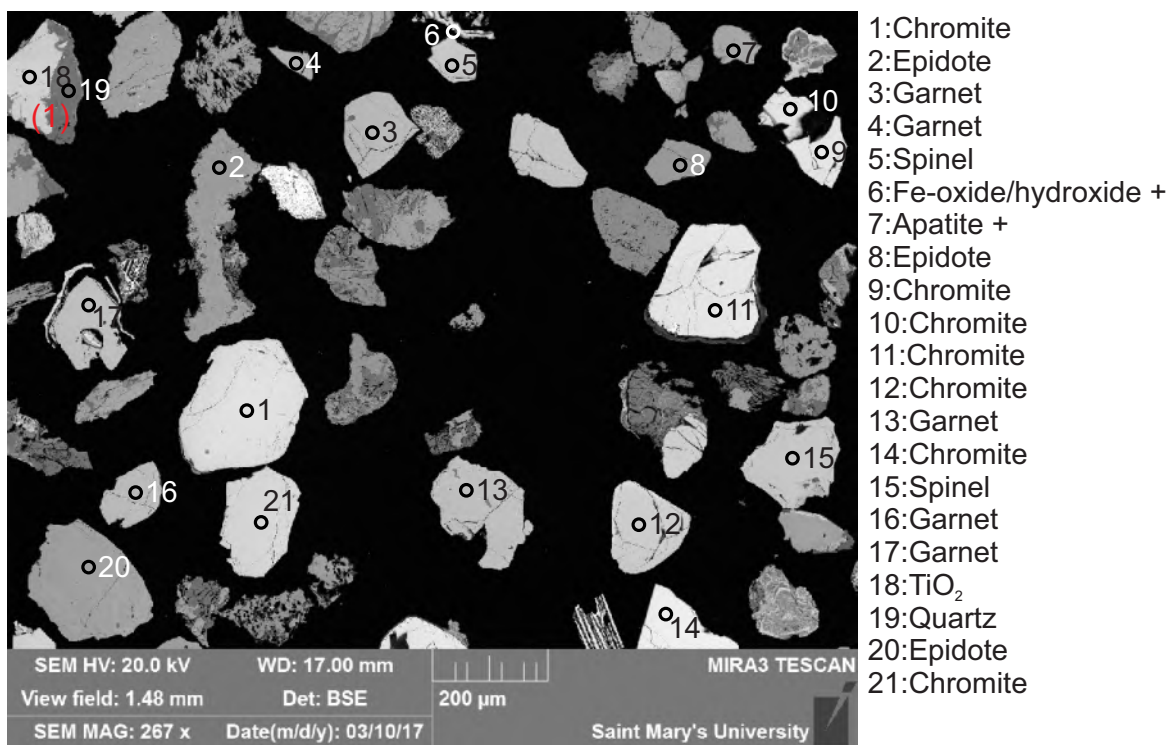

Figure B9.47: Sample S17 site 14 (SEM). 1: Lithic clast (titania + quartz, metamorphic).

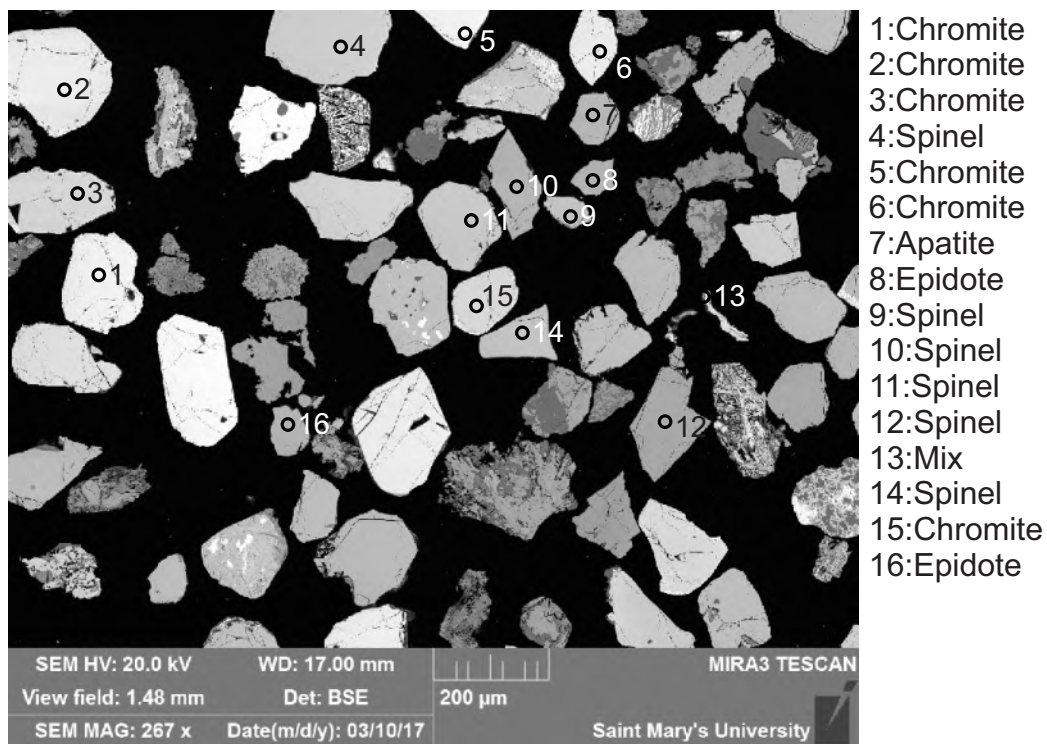

Figure B9.48: Sample S17 site 15 (SEM).

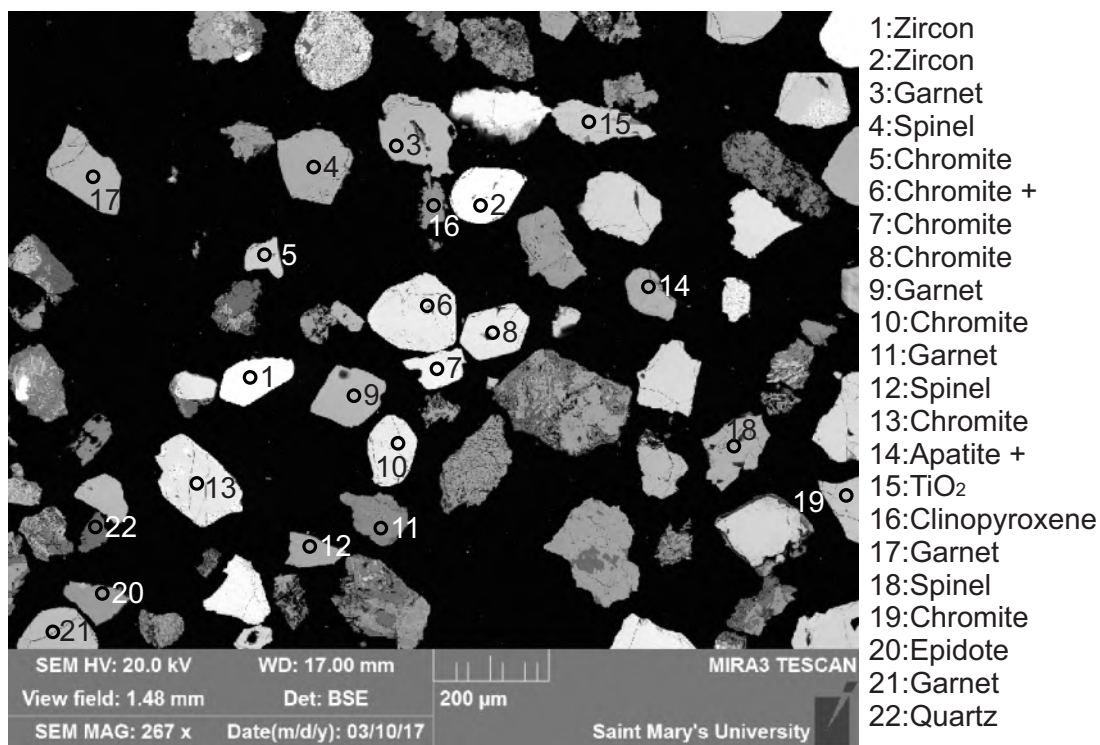

Figure B9.49: Sample S17 site 16 (SEM).



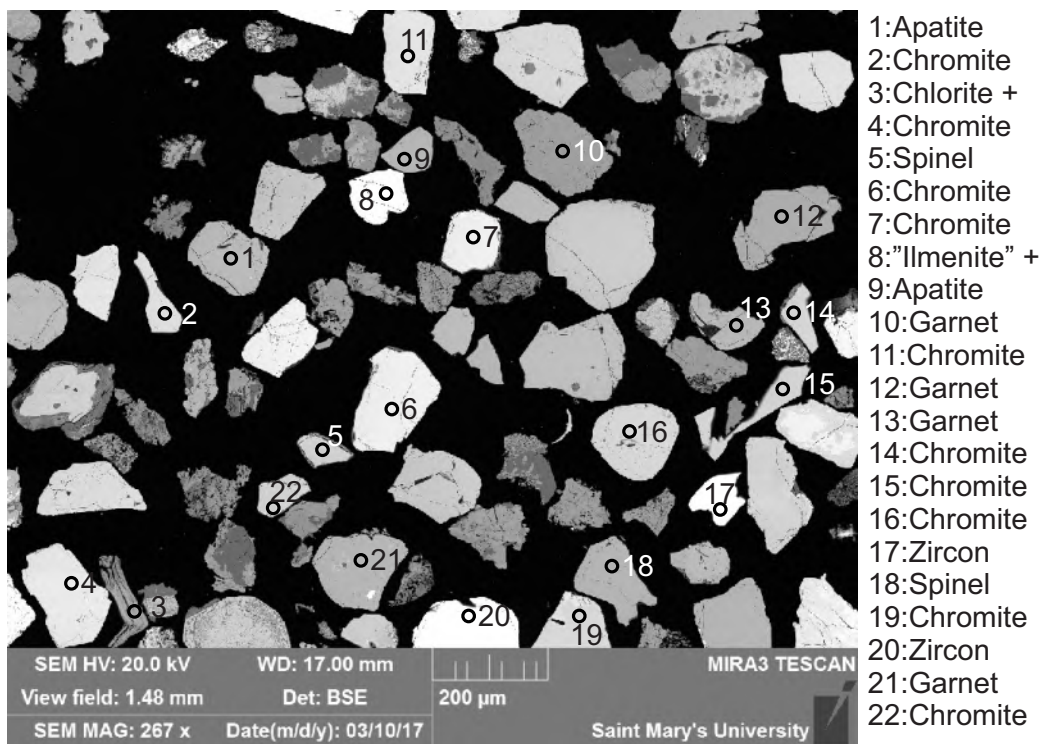

Figure B9.50: Sample S17 site 17 (SEM).

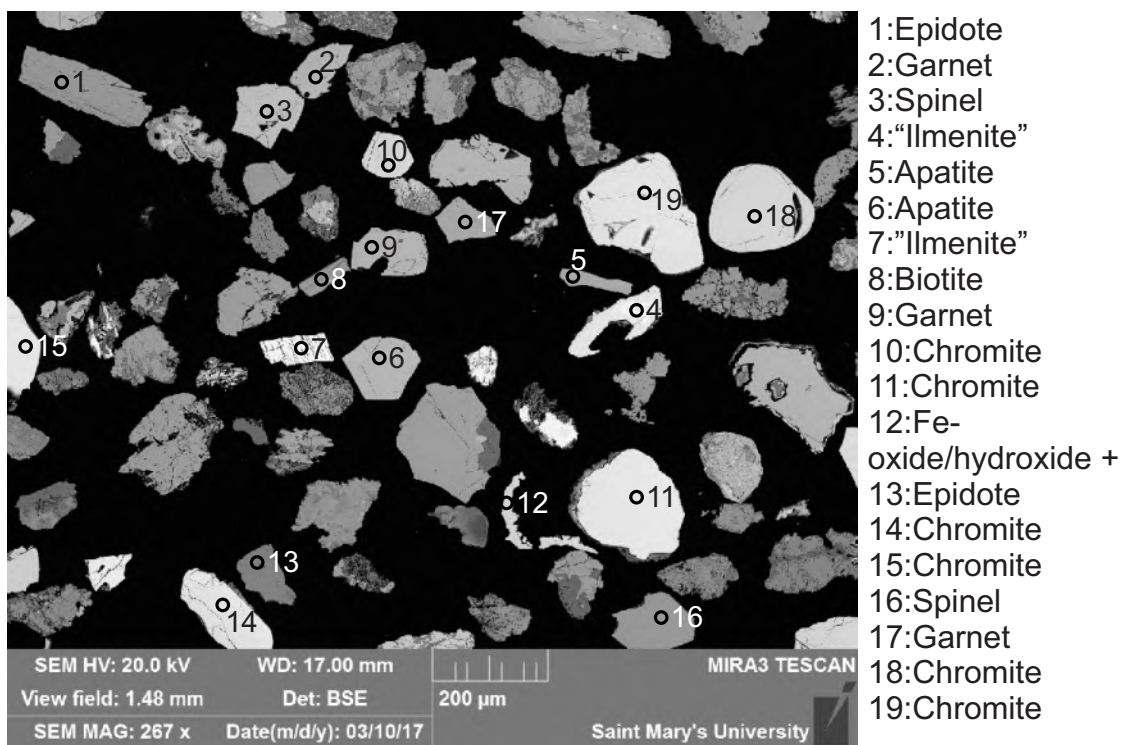

Figure B9.51: Sample S17 site 18 (SEM).

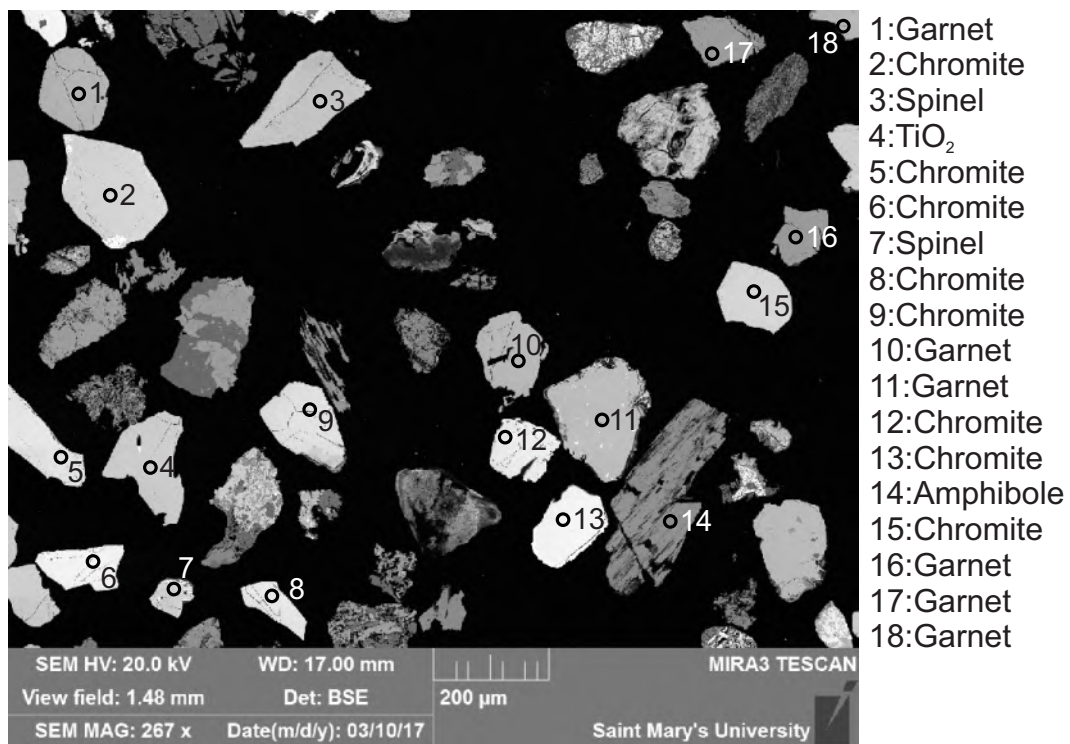

Figure B9.52: Sample S17 site 19 (SEM).



Table B9.1: EDS analyses of sample S17.

| Sample | Site | Position | Mineral  | SiO2   | TiO2  | Al2O3 | FeO   | MnO   | MgO   | CaO   | Na2O  | K2O  | P2O5 | SO3 | F | Cl | V2O5 | Cr2O3 | NiO | ZnO  | SrO | ZrO2 | HfO2 | WO3 | Total | Actual Total |
|--------|------|----------|----------|--------|-------|-------|-------|-------|-------|-------|-------|------|------|-----|---|----|------|-------|-----|------|-----|------|------|-----|-------|--------------|
| S17    | 1    | 1        | Ep       | 40.43  |       | 25.46 | 8.42  |       |       | 22.69 |       |      |      |     |   |    |      |       |     |      |     |      |      |     | 97    | 112          |
| S17    | 1    | 2        | Chr      |        |       | 15.50 | 17.40 |       | 10.71 |       |       |      |      |     |   |    | 0.45 | 55.94 |     |      |     |      |      |     | 100   | 112          |
| S17    | 1    | 3        | Feohy +  | 8.02   |       | 11.55 | 75.01 | 0.49  | 0.80  | 0.84  |       |      | 2.86 |     |   |    |      | 0.42  |     |      |     |      |      |     | 100   | 82           |
| S17    | 1    | 4        | Ep       | 40.26  |       | 24.37 | 9.53  | 0.28  |       | 22.57 |       |      |      |     |   |    |      |       |     |      |     |      |      |     | 97    | 109          |
| S17    | 1    | 5        | Ab       | 69.29  |       | 18.59 | 0.23  |       |       | 0.18  | 11.71 |      |      |     |   |    |      |       |     |      |     |      |      |     | 100   | 120          |
| S17    | 1    | 6        | "Chr"    |        |       | 1.29  | 47.92 | 1.08  | 6.17  |       |       |      |      |     |   |    |      | 43.54 |     |      |     |      |      |     | 100   | 99           |
| S17    | 1    | 7        | Chr      |        |       | 26.27 | 20.07 |       | 12.19 |       |       |      |      |     |   |    |      | 41.48 |     |      |     |      |      |     | 100   | 105          |
| S17    | 1    | 8        | Ep       | 40.99  |       | 21.66 | 12.13 |       |       | 21.83 | 0.39  |      |      |     |   |    |      |       |     |      |     |      |      |     | 97    | 106          |
| S17    | 1    | 9        | "Ilm" +  | 6.44   | 70.94 | 3.63  | 14.29 | 2.93  | 1.00  | 0.77  |       |      |      |     |   |    |      |       |     |      |     |      |      |     | 100   | 95           |
| S17    | 1    | 10       | Spl      |        |       | 47.40 | 12.74 |       | 18.83 |       |       |      |      |     |   |    |      | 21.02 |     |      |     |      |      |     | 100   | 107          |
| S17    | 1    | 11       | Chr      |        |       | 7.50  | 20.15 |       | 8.47  |       |       |      |      |     |   |    |      | 63.38 |     | 0.50 |     |      |      |     | 100   | 105          |
| S17    | 1    | 12       | Chr      |        |       | 8.01  | 21.28 |       | 8.78  |       |       |      |      |     |   |    |      | 61.93 |     |      |     |      |      |     | 100   | 101          |
| S17    | 1    | 13       | Mix      | 19.01  | 62.56 | 1.27  | 0.59  |       |       | 16.57 |       |      |      |     |   |    |      |       |     |      |     |      |      |     | 100   | 105          |
| S17    | 1    | 14       | Ep       | 40.81  |       | 25.58 | 8.38  |       |       | 22.22 |       |      |      |     |   |    |      |       |     |      |     |      |      |     | 97    | 106          |
| S17    | 1    | 15       | Chr +    | 18.59  | 0.30  | 3.73  | 34.88 | 2.81  | 15.62 | 0.38  | 0.54  |      |      |     |   |    |      | 22.39 |     | 0.76 |     |      |      |     | 100   | 101          |
| S17    | 1    | 16       | Spl      |        | 0.62  | 26.44 | 20.74 |       | 12.87 |       |       |      |      |     |   |    | 0.38 | 38.96 |     |      |     |      |      |     | 100   | 114          |
| S17    | 1    | 17       | Ep       | 40.24  |       | 25.34 | 8.85  |       |       | 22.57 |       |      |      |     |   |    |      |       |     |      |     |      |      |     | 97    | 108          |
| S17    | 1    | 18       | Chl      | 33.47  |       | 17.92 | 23.48 | 4.61  | 4.71  | 0.82  |       |      |      |     |   |    |      |       |     |      |     |      |      |     | 85    | 108          |
| S17    | 1    | 19       | Feohy +  | 8.59   |       | 9.46  | 77.60 |       | 0.80  | 0.93  |       |      | 2.61 |     |   |    |      |       |     |      |     |      |      |     | 100   | 81           |
| S17    | 1.2  | 1        | Ep       | 40.62  |       | 25.35 | 8.63  |       |       | 22.40 |       |      |      |     |   |    |      |       |     |      |     |      |      |     | 97    | 112          |
| S17    | 1.2  | 2        | Ab       | 69.48  |       | 18.86 |       |       |       |       | 11.66 |      |      |     |   |    |      |       |     |      |     |      |      |     | 100   | 120          |
| S17    | 1.2  | 3        | Ttn      | 32.27  | 32.38 | 3.60  | 4.44  |       | 1.04  | 25.90 | 0.37  |      |      |     |   |    |      |       |     |      |     |      |      |     | 100   | 94           |
| S17    | 1.2  | 4        | Ab       | 69.62  |       | 18.95 |       |       |       | 0.23  | 11.20 |      |      |     |   |    |      |       |     |      |     |      |      |     | 100   | 117          |
| S17    | 1.3  | 1        | Qz       | 100.00 |       |       |       |       |       |       |       |      |      |     |   |    |      |       |     |      |     |      |      |     | 100   | 121          |
| S17    | 1.3  | 2        | Ep       | 40.46  |       | 21.43 | 12.66 |       |       | 22.08 | 0.37  |      |      |     |   |    |      |       |     |      |     |      |      |     | 97    | 110          |
| S17    | 1.3  | 3        | ?Clay    | 55.75  |       | 19.09 | 12.57 |       | 8.05  | 1.32  | 2.67  | 0.56 |      |     |   |    |      |       |     |      |     |      |      |     | 100   | 95           |
| S17    | 1.3  | 4        | Ep       | 40.13  |       | 29.33 | 2.99  |       |       | 24.55 |       |      |      |     |   |    |      |       |     |      |     |      |      |     | 97    | 101          |
| S17    | 1.3  | 5        | Ep       | 40.67  |       | 28.49 | 4.81  | 0.28  |       | 22.75 |       |      |      |     |   |    |      |       |     |      |     |      |      |     | 97    | 110          |
| S17    | 1.3  | 6        | ?Clay    | 51.74  |       | 23.85 | 6.63  |       | 10.80 | 5.30  | 1.39  | 0.28 |      |     |   |    |      |       |     |      |     |      |      |     | 100   | 67           |
| S17    | 1.4  | 1        | TiO2     |        | 99.59 |       | 0.41  |       |       |       |       |      |      |     |   |    |      |       |     |      |     |      |      |     | 100   | 107          |
| S17    | 1.4  | 2        | Qz       | 99.67  |       | 0.33  |       |       |       |       |       |      |      |     |   |    |      |       |     |      |     |      |      |     | 100   | 116          |
| S17    | 2    | 1        | Chr      |        |       | 24.57 | 23.23 |       | 12.72 |       |       |      |      |     |   |    |      | 39.48 |     |      |     |      |      |     | 100   | 109          |
| S17    | 2    | 2        | Ep       | 40.41  |       | 25.84 | 7.60  |       |       | 22.89 |       |      |      |     |   |    |      | 0.26  |     |      |     |      |      |     | 97    | 114          |
| S17    | 2    | 3        | Hbl      | 49.72  | 0.57  | 10.33 | 2.58  |       | 19.86 | 11.40 | 1.62  |      |      |     |   |    |      | 0.92  |     |      |     |      |      |     | 97    | 116          |
| S17    | 2    | 4        | "Ilm"    |        | 62.61 |       | 34.04 | 3.35  |       |       |       |      |      |     |   |    |      |       |     |      |     |      |      |     | 100   | 94           |
| S17    | 2    | 5        | Cpx      | 53.39  |       | 4.17  | 2.27  |       | 16.47 | 22.80 |       |      |      |     |   |    |      | 0.91  |     |      |     |      |      |     | 100   | 116          |
| S17    | 2    | 6        | Ab + Chl | 59.24  |       | 20.94 | 7.54  | 0.78  | 5.23  | 0.87  | 4.83  | 0.57 |      |     |   |    |      |       |     |      |     |      |      |     | 100   | 72           |
| S17    | 2    | 7        | Ilm +    | 1.93   | 50.07 | 0.53  | 24.98 | 21.57 |       | 0.91  |       |      |      |     |   |    |      |       |     |      |     |      |      |     | 100   | 96           |
| S17    | 2    | 8        | Ep       | 39.83  |       | 20.43 | 12.19 |       | 2.51  | 21.43 | 0.61  |      |      |     |   |    |      |       |     |      |     |      |      |     | 97    | 93           |
| S17    | 2    | 9        | Ab       | 68.47  |       | 19.68 |       |       |       | 1.01  | 10.83 |      |      |     |   |    |      |       |     |      |     |      |      |     | 100   | 101          |
| S17    | 2    | 10       | Ep       | 41.22  |       | 31.32 | 1.63  |       |       | 22.83 |       |      |      |     |   |    |      |       |     |      |     |      |      |     | 97    | 107          |

Table B9.1: EDS analyses of sample S17.

| Sample | Site | Position | Mineral | SiO2   | TiO2  | Al2O3 | FeO   | MnO   | MgO   | CaO   | Na2O  | K2O   | P2O5 | SO3 | F | Cl | V2O5 | Cr2O3 | NiO  | ZnO  | SrO | ZrO2 | HfO2 | WO3  | Total | Actual Total |
|--------|------|----------|---------|--------|-------|-------|-------|-------|-------|-------|-------|-------|------|-----|---|----|------|-------|------|------|-----|------|------|------|-------|--------------|
| S17    | 2    | 11       | Ep      | 39.96  |       | 24.39 | 10.14 |       |       | 22.51 |       |       |      |     |   |    |      |       |      |      |     |      |      |      | 97    | 109          |
| S17    | 2    | 12       | Chl +   | 35.10  |       | 21.79 | 10.51 |       | 15.27 | 0.61  | 1.25  | 0.48  |      |     |   |    |      |       |      |      |     |      |      |      | 85    | 82           |
| S17    | 2    | 13       | Grt     | 39.59  |       | 20.92 | 32.00 | 1.03  | 4.67  | 1.81  |       |       |      |     |   |    |      |       |      |      |     |      |      |      | 100   | 111          |
| S17    | 2    | 14       | Feohy + | 9.38   |       | 9.99  | 72.43 | 2.36  |       | 0.96  |       |       | 1.81 |     |   |    |      |       |      |      |     |      |      | 3.06 | 100   | 76           |
| S17    | 2    | 15       | Qz      | 100.00 |       |       |       |       |       |       |       |       |      |     |   |    |      |       |      |      |     |      |      |      | 100   | 120          |
| S17    | 2    | 16       | Ep      | 40.29  | 0.47  | 22.30 | 11.45 |       |       | 22.49 |       |       |      |     |   |    |      |       |      |      |     |      |      |      | 97    | 111          |
| S17    | 2    | 17       | Cpx     | 53.68  |       | 3.98  | 2.02  |       | 16.55 | 22.85 |       |       |      |     |   |    |      | 0.93  |      |      |     |      |      |      | 100   | 109          |
| S17    | 2    | 18       | Grt     | 39.57  |       | 20.90 | 31.44 | 1.17  | 3.77  | 3.15  |       |       |      |     |   |    |      |       |      |      |     |      |      |      | 100   | 109          |
| S17    | 2    | 19       | Ads     | 58.69  |       | 24.51 | 0.97  |       |       | 9.69  | 6.14  |       |      |     |   |    |      |       |      |      |     |      |      |      | 100   | 102          |
| S17    | 2    | 20       | Ep      | 40.68  |       | 22.33 | 8.41  |       | 2.59  | 22.99 |       |       |      |     |   |    |      |       |      |      |     |      |      |      | 97    | 107          |
| S17    | 2    | 21       | Chr     |        |       | 10.71 | 25.99 |       | 7.97  |       |       |       |      |     |   |    |      | 55.34 |      |      |     |      |      |      | 100   | 105          |
| S17    | 2    | 22       | Chr     |        | 0.54  | 21.85 | 23.75 |       | 9.39  |       |       |       |      |     |   |    | 0.39 | 44.08 |      |      |     |      |      |      | 100   | 106          |
| S17    | 2.2  | 1        | Ab      | 69.22  |       | 18.98 |       |       |       | 0.44  | 11.35 |       |      |     |   |    |      |       |      |      |     |      |      |      | 100   | 120          |
| S17    | 2.2  | 2        | Ep      | 40.96  |       | 31.17 | 1.72  |       |       | 23.15 |       |       |      |     |   |    |      |       |      |      |     |      |      |      | 97    | 113          |
| S17    | 2.2  | 3        | Ep      | 40.31  |       | 27.19 | 6.31  |       | 0.49  | 22.70 |       |       |      |     |   |    |      |       |      |      |     |      |      |      | 97    | 108          |
| S17    | 2.3  | 1        | Qz      | 100.00 |       |       |       |       |       |       |       |       |      |     |   |    |      |       |      |      |     |      |      |      | 100   | 120          |
| S17    | 2.3  | 2        | Ep      | 39.98  | 0.54  | 22.11 | 11.90 |       |       | 22.47 |       |       |      |     |   |    |      |       |      |      |     |      |      |      | 97    | 112          |
| S17    | 2.4  | 1        | Chr     |        |       | 7.57  | 34.24 |       | 1.94  |       |       |       |      |     |   |    | 0.76 | 54.74 |      | 0.75 |     |      |      |      | 100   | 101          |
| S17    | 2.4  | 2        | Cr-Chl  | 31.80  |       | 14.31 | 3.12  |       | 31.93 |       |       |       |      |     |   |    |      | 3.84  |      |      |     |      |      |      | 85    | 106          |
| S17    | 2.4  | 3        | Cr-Chl  | 30.41  |       | 13.80 | 3.99  |       | 31.04 |       |       |       |      |     |   |    |      | 5.76  |      |      |     |      |      |      | 85    | 104          |
| S17    | 2.4  | 4        | Chr     |        |       | 3.79  | 45.99 |       | 1.78  |       |       |       |      |     |   |    | 0.49 | 47.94 |      |      |     |      |      |      | 100   | 102          |
| S17    | 2.5  | 1        | Ep      | 40.07  |       | 24.65 | 9.39  |       |       | 22.89 |       |       |      |     |   |    |      |       |      |      |     |      |      |      | 97    | 111          |
| S17    | 2.5  | 2        | Ep      | 42.39  |       | 22.53 | 10.72 |       | 1.86  | 18.77 | 0.73  |       |      |     |   |    |      |       |      |      |     |      |      |      | 97    | 100          |
| S17    | 2.5  | 3        | Ep      | 40.04  |       | 23.05 | 11.17 |       | 1.17  | 21.57 |       |       |      |     |   |    |      |       |      |      |     |      |      |      | 97    | 110          |
| S17    | 2.5  | 4        | Ilm     |        | 52.07 |       | 45.45 | 2.49  |       |       |       |       |      |     |   |    |      |       |      |      |     |      |      |      | 100   | 106          |
| S17    | 2.5  | 5        | TiO2    |        | 99.59 |       | 0.41  |       |       |       |       |       |      |     |   |    |      |       |      |      |     |      |      |      | 100   | 109          |
| S17    | 2.5  | 6        | "Ilm"   | 2.53   | 88.85 | 3.03  | 3.60  |       |       | 0.63  | 0.32  |       | 1.04 |     |   |    |      |       |      |      |     |      |      |      | 100   | 99           |
| S17    | 2.5  | 7        | "Ilm"   |        | 53.25 |       | 43.87 | 2.88  |       |       |       |       |      |     |   |    |      |       |      |      |     |      |      |      | 100   | 106          |
| S17    | 3    | 1        | Spl     |        |       | 29.86 | 19.69 |       | 14.31 |       |       |       |      |     |   |    |      | 36.14 |      |      |     |      |      |      | 100   | 109          |
| S17    | 3    | 2        | Ep      | 40.25  |       | 29.37 | 4.00  |       |       | 23.39 |       |       |      |     |   |    |      |       |      |      |     |      |      |      | 97    | 109          |
| S17    | 3    | 3        | Ep      | 40.00  |       | 19.17 | 13.52 |       | 1.85  | 22.46 |       |       |      |     |   |    |      |       |      |      |     |      |      |      | 97    | 101          |
| S17    | 3    | 4        | ?Plag   | 65.45  |       | 16.86 | 1.85  |       | 1.70  | 14.14 |       |       |      |     |   |    |      |       |      |      |     |      |      |      | 100   | 112          |
| S17    | 3    | 5        | Grt     | 39.64  |       | 20.92 | 28.99 | 0.53  | 2.38  | 7.53  |       |       |      |     |   |    |      |       |      |      |     |      |      |      | 100   | 117          |
| S17    | 3    | 6        | Grt     | 39.14  |       | 20.42 | 19.93 | 13.61 | 0.64  | 6.25  |       |       |      |     |   |    |      |       |      |      |     |      |      |      | 100   | 114          |
| S17    | 3    | 7        | Chr     |        |       | 5.71  | 23.00 |       | 7.59  |       |       |       |      |     |   |    |      | 63.71 |      |      |     |      |      |      | 100   | 111          |
| S17    | 3    | 8        | Ttn     | 34.92  | 28.88 | 4.89  | 4.04  |       | 3.88  | 21.65 | 0.88  | 0.20  |      |     |   |    | 0.66 |       |      |      |     |      |      |      | 100   | 101          |
| S17    | 3    | 9        | Chr +   | 5.70   | 0.55  | 4.50  | 45.61 | 1.57  | 3.25  | 0.36  |       |       |      |     |   |    | 0.71 | 37.30 | 0.45 |      |     |      |      |      | 100   | 87           |
| S17    | 3    | 10       | Ep      | 39.98  |       | 24.11 | 10.06 |       |       | 22.84 |       |       |      |     |   |    |      |       |      |      |     |      |      |      | 97    | 106          |
| S17    | 3    | 11       | Kfs     | 62.79  |       | 17.61 | 1.47  |       | 1.88  | 0.91  | 2.47  | 12.14 | 0.73 |     |   |    |      |       |      |      |     |      |      |      | 100   | 107          |
| S17    | 3    | 12       | "Ilm"   | 0.70   | 58.47 |       | 38.35 | 1.80  |       | 0.68  |       |       |      |     |   |    |      |       |      |      |     |      |      |      | 100   | 94           |
| S17    | 3    | 13       | Ttn     | 33.05  | 37.50 | 0.95  | 0.93  |       |       | 27.57 |       |       |      |     |   |    |      |       |      |      |     |      |      |      | 100   | 103          |

Table B9.1: EDS analyses of sample S17.

| Sample | Site | Position | Mineral | SiO2  | TiO2  | Al2O3 | FeO   | MnO  | MgO   | CaO   | Na2O  | K2O   | P2O5 | SO3 | F    | Cl | V2O5 | Cr2O3 | NiO | ZnO | SrO | ZrO2 | HfO2 | WO3 | Total | Actual Total |
|--------|------|----------|---------|-------|-------|-------|-------|------|-------|-------|-------|-------|------|-----|------|----|------|-------|-----|-----|-----|------|------|-----|-------|--------------|
| S17    | 3.2  | 1        | Ep      | 38.43 |       | 22.97 | 12.50 |      |       | 22.69 | 0.41  |       |      |     |      |    |      |       |     |     |     |      |      |     | 97    | 96           |
| S17    | 3.2  | 2        | Ttn     | 33.61 | 36.79 | 1.07  | 0.77  |      |       | 27.77 |       |       |      |     |      |    |      |       |     |     |     |      |      |     | 100   | 110          |
| S17    | 3.2  | 3        | Ab      | 68.51 |       | 19.46 |       |      |       | 0.84  | 11.19 |       |      |     |      |    |      |       |     |     |     |      |      |     | 100   | 117          |
| S17    | 3.2  | 4        | Ab      | 68.82 |       | 19.11 |       |      |       | 0.69  | 11.38 |       |      |     |      |    |      |       |     |     |     |      |      |     | 100   | 117          |
| S17    | 3.3  | 1        | Ilm     |       | 55.74 |       | 41.92 | 2.34 |       |       |       |       |      |     |      |    |      |       |     |     |     |      |      |     | 100   | 102          |
| S17    | 3.3  | 2        | TiO2    |       | 98.78 |       | 0.49  |      |       | 0.73  |       |       |      |     |      |    |      |       |     |     |     |      |      |     | 100   | 110          |
| S17    | 3.3  | 3        | Ttn     | 32.79 | 38.18 | 0.74  | 0.88  |      |       | 27.42 |       |       |      |     |      |    |      |       |     |     |     |      |      |     | 100   | 110          |
| S17    | 4    | 1        | Kfs     | 60.32 |       | 26.05 | 0.83  |      |       | 0.84  | 5.96  | 4.96  |      |     | 1.04 |    |      |       |     |     |     |      |      |     | 100   | 96           |
| S17    | 4    | 2        | "Ilm"   |       | 65.52 |       | 31.19 | 2.45 |       | 0.85  |       |       |      |     |      |    |      |       |     |     |     |      |      |     | 100   | 96           |
| S17    | 4    | 3        | Grt     | 41.57 |       | 20.17 | 26.02 | 2.21 | 1.45  | 8.57  |       |       |      |     |      |    |      |       |     |     |     |      |      |     | 100   | 112          |
| S17    | 4    | 4        | Qz      | 98.06 |       | 1.48  | 0.47  |      |       |       |       |       |      |     |      |    |      |       |     |     |     |      |      |     | 100   | 118          |
| S17    | 4    | 5        | Ep      | 41.65 |       | 23.04 | 10.11 |      |       | 22.20 |       |       |      |     |      |    |      |       |     |     |     |      |      |     | 97    | 106          |
| S17    | 4    | 6        | Spl     |       | 0.48  | 36.67 | 17.82 |      | 13.69 |       |       |       |      |     |      |    |      | 31.34 |     |     |     |      |      |     | 100   | 105          |
| S17    | 4    | 7        | Feohy + | 8.77  |       | 11.78 | 74.88 |      | 0.84  | 1.05  |       |       | 2.69 |     |      |    |      |       |     |     |     |      |      |     | 100   | 81           |
| S17    | 4    | 8        | Chr     |       |       | 12.67 | 22.33 |      | 10.32 |       |       |       |      |     |      |    | 0.38 | 54.30 |     |     |     |      |      |     | 100   | 112          |
| S17    | 4    | 9        | ?       | 30.45 |       | 32.14 | 16.09 |      | 20.94 |       | 0.39  |       |      |     |      |    |      |       |     |     |     |      |      |     | 100   | 93           |
| S17    | 4    | 10       | ?Tur    | 52.18 |       | 28.02 | 0.52  |      |       | 15.24 | 1.83  | 2.21  |      |     |      |    |      |       |     |     |     |      |      |     | 100   | 111          |
| S17    | 4    | 11       | Ep      | 40.30 |       | 24.17 | 9.61  |      |       | 22.92 |       |       |      |     |      |    |      |       |     |     |     |      |      |     | 97    | 115          |
| S17    | 4    | 12       | "Ilm"   |       | 67.16 |       | 32.24 | 0.61 |       |       |       |       |      |     |      |    |      |       |     |     |     |      |      |     | 100   | 97           |
| S17    | 4    | 13       | Ep      | 40.30 |       | 23.63 | 10.62 |      |       | 22.45 |       |       |      |     |      |    |      |       |     |     |     |      |      |     | 97    | 112          |
| S17    | 4    | 14       | Ep      | 40.68 |       | 27.50 | 5.93  |      |       | 22.90 |       |       |      |     |      |    |      |       |     |     |     |      |      |     | 97    | 107          |
| S17    | 4    | 15       | Ep      | 41.50 |       | 24.94 | 8.10  | 0.41 | 1.97  | 19.44 | 0.34  | 0.31  |      |     |      |    |      |       |     |     |     |      |      |     | 97    | 103          |
| S17    | 4    | 16       | "Ilm" + | 1.85  | 76.95 | 1.80  | 17.07 | 0.36 |       | 0.52  | 0.67  |       | 0.77 |     |      |    |      |       |     |     |     |      |      |     | 100   | 94           |
| S17    | 4.2  | 1        | Chl +   | 38.36 | 1.19  | 14.18 | 16.99 |      | 13.35 | 0.28  | 0.48  | 0.17  |      |     |      |    |      |       |     |     |     |      |      |     | 85    | 93           |
| S17    | 4.2  | 2        | Ilm +   | 4.27  | 49.15 | 1.08  | 36.73 | 7.48 | 0.99  | 0.30  |       |       |      |     |      |    |      |       |     |     |     |      |      |     | 100   | 94           |
| S17    | 4.2  | 3        | Ilm +   | 2.82  | 67.47 | 1.07  | 19.39 | 3.77 |       | 5.49  |       |       |      |     |      |    |      |       |     |     |     |      |      |     | 100   | 87           |
| S17    | 4.2  | 4        | Ilm     | 0.95  | 55.38 | 0.74  | 41.12 | 1.80 |       |       |       |       |      |     |      |    |      |       |     |     |     |      |      |     | 100   | 81           |
| S17    | 4.3  | 1        | Chl +   | 34.24 |       | 16.73 | 16.11 |      | 14.64 | 0.67  | 1.61  | 0.32  | 0.66 |     |      |    |      |       |     |     |     |      |      |     | 85    | 93           |
| S17    | 4.3  | 2        | Ttn     | 32.30 | 33.84 | 2.28  | 2.87  |      | 0.81  | 26.91 |       |       | 0.99 |     |      |    |      |       |     |     |     |      |      |     | 100   | 109          |
| S17    | 4.3  | 3        | Ilm     |       | 50.63 |       | 45.90 | 2.84 |       | 0.62  |       |       |      |     |      |    |      |       |     |     |     |      |      |     | 100   | 103          |
| S17    | 4.3  | 4        | Chl +   | 36.31 | 1.67  | 14.12 | 15.39 |      | 13.74 | 1.33  | 1.30  | 1.16  |      |     |      |    |      |       |     |     |     |      |      |     | 85    | 90           |
| S17    | 4.3  | 5        | Chl +   | 35.48 |       | 16.51 | 15.96 |      | 14.41 | 0.31  | 1.56  | 0.77  |      |     |      |    |      |       |     |     |     |      |      |     | 85    | 94           |
| S17    | 4.3  | 6        | Ilm     |       | 50.99 |       | 43.88 | 3.82 |       | 1.30  |       |       |      |     |      |    |      |       |     |     |     |      |      |     | 100   | 105          |
| S17    | 4.3  | 7        | Ttn     | 33.40 | 35.07 | 2.33  | 1.56  |      | 0.58  | 27.06 |       |       |      |     |      |    |      |       |     |     |     |      |      |     | 100   | 112          |
| S17    | 4.4  | 1        | Ep      | 40.38 |       | 22.35 | 11.84 |      |       | 22.43 |       |       |      |     |      |    |      |       |     |     |     |      |      |     | 97    | 110          |
| S17    | 4.4  | 2        | ?Chl +  | 38.72 |       | 20.45 | 15.54 |      | 19.95 |       | 1.20  | 1.13  |      |     |      |    |      |       |     |     |     |      |      |     | 97    | 98           |
| S17    | 4.4  | 3        | Ab      | 67.27 |       | 19.97 | 0.24  |      |       | 1.78  | 10.73 |       |      |     |      |    |      |       |     |     |     |      |      |     | 100   | 118          |
| S17    | 4.4  | 4        | Ms      | 49.23 |       | 32.50 | 1.70  |      | 0.96  |       |       | 10.61 |      |     |      |    |      |       |     |     |     |      |      |     | 95    | 108          |
| S17    | 5    | 1        | Chr     |       |       | 15.66 | 22.62 |      | 10.06 |       |       |       |      |     |      |    | 0.43 | 51.24 |     |     |     |      |      |     | 100   | 108          |
| S17    | 5    | 2        | Grt     | 39.32 |       | 20.60 | 29.12 | 3.02 | 1.08  | 6.86  |       |       |      |     |      |    |      |       |     |     |     |      |      |     | 100   | 112          |
| S17    | 5    | 3        | Qz +    | 75.21 |       | 12.72 | 2.60  |      |       | 9.47  |       |       |      |     |      |    |      |       |     |     |     |      |      |     | 100   | 112          |

Table B9.1: EDS analyses of sample S17.

| Sample | Site | Position | Mineral   | SiO2   | TiO2 | Al2O3 | FeO   | MnO  | MgO   | CaO   | Na2O | K2O  | P2O5 | SO3 | F    | Cl | V2O5 | Cr2O3 | NiO | ZnO  | SrO | ZrO2 | HfO2 | WO3 | Total | Actual Total |
|--------|------|----------|-----------|--------|------|-------|-------|------|-------|-------|------|------|------|-----|------|----|------|-------|-----|------|-----|------|------|-----|-------|--------------|
| S17    | 5    | 4        | Chr +     | 9.05   | 0.67 | 5.48  | 28.16 |      | 9.82  |       |      |      |      |     |      |    | 0.44 | 45.55 |     | 0.84 |     |      |      |     | 100   | 109          |
| S17    | 5    | 5        | Qz        | 100.00 |      |       |       |      |       |       |      |      |      |     |      |    |      |       |     |      |     |      |      |     | 100   | 126          |
| S17    | 5    | 6        | Ep +      | 44.82  |      | 26.03 | 4.51  |      | 2.66  | 17.20 | 1.46 |      |      |     |      |    |      | 0.33  |     |      |     |      |      |     | 97    | 92           |
| S17    | 5    | 7        | Grt       | 39.45  |      | 20.80 | 29.86 | 0.85 | 3.42  | 5.62  |      |      |      |     |      |    |      |       |     |      |     |      |      |     | 100   | 116          |
| S17    | 5    | 8        | Chr       |        |      | 19.04 | 19.59 |      | 11.57 |       |      |      |      |     |      |    |      | 49.80 |     |      |     |      |      |     | 100   | 112          |
| S17    | 5    | 9        | Spl       |        |      | 30.30 | 16.91 |      | 14.93 |       |      |      |      |     |      |    |      | 37.86 |     |      |     |      |      |     | 100   | 115          |
| S17    | 5    | 10       | Ms +      | 47.91  | 0.26 | 29.21 | 6.88  |      | 1.81  |       | 0.93 | 8.01 |      |     |      |    |      |       |     |      |     |      |      |     | 95    | 103          |
| S17    | 5    | 11       | Ep        | 41.55  |      | 25.16 | 8.48  | 0.53 | 1.07  | 19.89 | 0.32 |      |      |     |      |    |      |       |     |      |     |      |      |     | 97    | 110          |
| S17    | 5    | 12       | Qz        | 100.00 |      |       |       |      |       |       |      |      |      |     |      |    |      |       |     |      |     |      |      |     | 100   | 117          |
| S17    | 5    | 13       | Qz        | 98.92  |      | 0.69  |       |      |       |       | 0.38 |      |      |     |      |    |      |       |     |      |     |      |      |     | 100   | 120          |
| S17    | 5    | 14       | Ep        | 40.05  |      | 22.91 | 11.28 |      |       | 22.76 |      |      |      |     |      |    |      |       |     |      |     |      |      |     | 97    | 108          |
| S17    | 5    | 15       | Cpx       | 50.58  |      | 2.02  | 3.42  |      | 15.03 | 22.13 |      |      |      |     | 5.91 |    |      | 0.91  |     |      |     |      |      |     | 100   | 105          |
| S17    | 5    | 16       | Amph      | 52.23  | 0.74 | 5.31  | 11.10 |      | 16.44 | 10.58 | 0.60 |      |      |     |      |    |      |       |     |      |     |      |      |     | 97    | 118          |
| S17    | 5    | 17       | Chr       | 0.60   |      | 6.68  | 32.24 |      | 2.60  |       |      |      |      |     |      |    | 0.46 | 57.41 |     |      |     |      |      |     | 100   | 103          |
| S17    | 5    | 18       | Ep        | 39.88  |      | 22.21 | 12.24 |      |       | 22.67 |      |      |      |     |      |    |      |       |     |      |     |      |      |     | 97    | 107          |
| S17    | 5    | 19       | Qz        | 100.00 |      |       |       |      |       |       |      |      |      |     |      |    |      |       |     |      |     |      |      |     | 100   | 102          |
| S17    | 5    | 20       | Ep        | 40.85  | 0.31 | 23.09 | 10.24 |      | 1.33  | 20.84 | 0.34 |      |      |     |      |    |      |       |     |      |     |      |      |     | 97    | 102          |
| S17    | 5.2  | 1        | Qz        | 100.00 |      |       |       |      |       |       |      |      |      |     |      |    |      |       |     |      |     |      |      |     | 100   | 119          |
| S17    | 5.2  | 2        | Ep +      | 45.97  |      | 23.25 | 7.46  |      |       | 20.32 |      |      |      |     |      |    |      |       |     |      |     |      |      |     | 97    | 110          |
| S17    | 5.2  | 3        | Qz        | 96.28  |      | 1.62  | 0.55  |      |       | 1.55  |      |      |      |     |      |    |      |       |     |      |     |      |      |     | 100   | 120          |
| S17    | 5.2  | 4        | Ep        | 40.33  |      | 24.88 | 9.20  |      |       | 22.59 |      |      |      |     |      |    |      |       |     |      |     |      |      |     | 97    | 110          |
| S17    | 5.2  | 5        | Qz +      | 91.51  |      | 4.18  | 0.82  |      |       | 3.50  |      |      |      |     |      |    |      |       |     |      |     |      |      |     | 100   | 116          |
| S17    | 5.3  | 1        | Qz        | 100.00 |      |       |       |      |       |       |      |      |      |     |      |    |      |       |     |      |     |      |      |     | 100   | 121          |
| S17    | 5.3  | 2        | Ep        | 39.73  | 0.41 | 21.97 | 12.58 |      |       | 22.31 |      |      |      |     |      |    |      |       |     |      |     |      |      |     | 97    | 111          |
| S17    | 5.4  | 1        | Cr-Chl    | 30.85  |      | 17.17 | 2.95  |      | 29.56 |       | 0.35 |      |      |     | 3.77 |    |      | 0.35  |     |      |     |      |      |     | 85    | 102          |
| S17    | 5.4  | 2        | Cr-Chl    | 35.05  |      | 9.10  | 13.77 |      | 23.58 |       | 0.43 |      |      |     |      |    |      | 3.08  |     |      |     |      |      |     | 85    | 91           |
| S17    | 5.4  | 3        | Cr-Chl    | 35.45  |      | 16.51 | 2.62  |      | 28.54 |       | 0.77 |      |      |     |      |    |      | 1.11  |     |      |     |      |      |     | 85    | 96           |
| S17    | 5.4  | 4        | Cr-Chl    | 39.67  |      | 7.96  | 3.47  |      | 31.12 |       | 0.43 |      |      |     |      |    |      | 2.35  |     |      |     |      |      |     | 85    | 66           |
| S17    | 5.4  | 5        | Chr +     | 13.75  | 0.61 | 6.26  | 24.02 |      | 13.76 |       | 0.37 |      |      |     |      |    |      | 40.69 |     | 0.55 |     |      |      |     | 100   | 102          |
| S17    | 5.4  | 6        | Chr +     | 9.99   | 0.70 | 6.12  | 26.35 |      | 11.23 |       |      |      |      |     |      |    | 0.53 | 44.46 |     | 0.64 |     |      |      |     | 100   | 105          |
| S17    | 5.4  | 7        | Chr +     | 13.60  | 0.58 | 6.54  | 23.74 |      | 14.50 |       |      |      |      |     |      |    | 0.45 | 39.95 |     | 0.64 |     |      |      |     | 100   | 103          |
| S17    | 6    | 1        | Grt (Pyr) | 39.50  |      | 21.30 | 17.46 |      | 14.28 | 5.84  | 0.96 | 0.65 |      |     |      |    |      |       |     |      |     |      |      |     | 100   | 101          |
| S17    | 6    | 2        | Spl       |        |      | 40.52 | 16.21 |      | 16.18 |       |      |      |      |     |      |    |      | 27.09 |     |      |     |      |      |     | 100   | 107          |
| S17    | 6    | 3        | Chr       |        | 0.60 | 21.80 | 22.44 |      | 10.03 |       |      |      |      |     |      |    |      | 45.13 |     |      |     |      |      |     | 100   | 106          |
| S17    | 6    | 4        | Chr       |        |      | 13.55 | 20.74 |      | 10.12 |       |      |      |      |     |      |    | 0.50 | 55.09 |     |      |     |      |      |     | 100   | 104          |
| S17    | 6    | 5        | Spl       |        |      | 27.75 | 26.31 |      | 10.64 |       |      |      |      |     |      |    |      | 35.30 |     |      |     |      |      |     | 100   | 107          |
| S17    | 6    | 6        | Spl       |        | 0.66 | 29.94 | 21.63 |      | 13.19 |       |      |      |      |     |      |    | 0.44 | 34.14 |     |      |     |      |      |     | 100   | 109          |
| S17    | 6    | 7        | Ep        | 40.29  |      | 22.44 | 12.13 | 0.37 |       | 21.77 |      |      |      |     |      |    |      |       |     |      |     |      |      |     | 97    | 107          |
| S17    | 6    | 8        | Spl       |        | 0.58 | 28.17 | 25.21 |      | 12.57 |       |      |      |      |     |      |    |      | 33.47 |     |      |     |      |      |     | 100   | 107          |
| S17    | 6    | 9        | Chr       |        |      | 8.12  | 22.24 |      | 8.48  |       |      |      |      |     |      |    |      | 61.16 |     |      |     |      |      |     | 100   | 106          |
| S17    | 6    | 10       | Ep        | 40.12  |      | 22.11 | 12.30 |      |       | 22.47 |      |      |      |     |      |    |      |       |     |      |     |      |      |     | 97    | 111          |

Table B9.1: EDS analyses of sample S17.

| Sample | Site | Position | Mineral | SiO2   | TiO2  | Al2O3 | FeO   | MnO  | MgO   | CaO   | Na2O  | K2O  | P2O5 | SO3  | F    | Cl | V2O5 | Cr2O3 | NiO  | ZnO  | SrO | ZrO2 | HfO2 | WO3 | Total | Actual Total |
|--------|------|----------|---------|--------|-------|-------|-------|------|-------|-------|-------|------|------|------|------|----|------|-------|------|------|-----|------|------|-----|-------|--------------|
| S17    | 6    | 11       | Ep      | 40.51  |       | 29.04 | 4.75  |      | 0.61  | 22.08 |       |      |      |      |      |    |      |       |      |      |     |      |      |     | 97    | 116          |
| S17    | 6    | 12       | St      | 29.62  | 0.69  | 54.05 | 13.90 |      | 1.75  |       |       |      |      |      |      |    |      |       |      |      |     |      |      |     | 100   | 112          |
| S17    | 6    | 13       | Ilm     |        | 51.47 |       | 45.28 | 3.25 |       |       |       |      |      |      |      |    |      |       |      |      |     |      |      |     | 100   | 103          |
| S17    | 6    | 14       | Amph    | 51.01  | 0.54  | 6.83  | 5.93  |      | 18.47 | 11.84 | 1.56  |      |      |      |      |    |      | 0.81  |      |      |     |      |      |     | 97    | 112          |
| S17    | 6    | 15       | Ttn     | 32.46  | 38.29 | 0.90  | 0.76  |      |       | 27.59 |       |      |      |      |      |    |      |       |      |      |     |      |      |     | 100   | 111          |
| S17    | 6    | 16       | Ep      | 39.71  |       | 21.54 | 13.04 |      |       | 22.71 |       |      |      |      |      |    |      |       |      |      |     |      |      |     | 97    | 105          |
| S17    | 6    | 17       | Ab      | 68.62  |       | 18.88 | 1.30  |      |       |       | 11.20 |      |      |      |      |    |      |       |      |      |     |      |      |     | 100   | 110          |
| S17    | 6    | 18       | Feohy + | 9.52   |       | 9.56  | 77.09 | 0.59 |       | 0.84  |       |      | 2.40 |      |      |    |      |       |      |      |     |      |      |     | 100   | 82           |
| S17    | 6    | 19       | Ep      | 40.09  |       | 22.85 | 11.32 |      |       | 22.74 |       |      |      |      |      |    |      |       |      |      |     |      |      |     | 97    | 116          |
| S17    | 6    | 20       | Ab + Qz | 81.54  |       | 10.47 | 0.46  |      |       | 0.19  | 7.33  |      |      |      |      |    |      |       |      |      |     |      |      |     | 100   | 129          |
| S17    | 6    | 21       | Ep      | 41.43  |       | 21.09 | 13.26 |      |       | 21.22 |       |      |      |      |      |    |      |       |      |      |     |      |      |     | 97    | 101          |
| S17    | 6.2  | 1        | Ep      | 39.89  |       | 25.39 | 8.76  | 0.75 |       | 22.21 |       |      |      |      |      |    |      |       |      |      |     |      |      |     | 97    | 109          |
| S17    | 6.2  | 2        | Ab      | 69.52  |       | 18.76 |       |      |       |       | 11.72 |      |      |      |      |    |      |       |      |      |     |      |      |     | 100   | 117          |
| S17    | 6.3  | 1        | Ilm     |        | 48.75 |       | 48.89 | 2.04 |       | 0.32  |       |      |      |      |      |    |      |       |      |      |     |      |      |     | 100   | 105          |
| S17    | 6.3  | 2        | Clay    | 53.04  |       | 19.63 | 10.64 |      | 12.94 | 2.36  | 0.89  | 0.51 |      |      |      |    |      |       |      |      |     |      |      |     | 100   | 82           |
| S17    | 6.3  | 3        | Ttn     | 32.69  | 36.82 | 1.56  | 0.68  |      |       | 27.67 |       |      | 0.59 |      |      |    |      |       |      |      |     |      |      |     | 100   | 112          |
| S17    | 6.3  | 4        | "Ilm"   | 0.59   | 65.61 |       | 32.43 | 0.53 |       | 0.84  |       |      |      |      |      |    |      |       |      |      |     |      |      |     | 100   | 99           |
| S17    | 6.4  | 1        | Amph    | 54.77  |       | 3.60  | 12.50 | 0.43 | 17.62 | 7.17  | 0.59  |      |      |      |      |    |      | 0.32  |      |      |     |      |      |     | 97    | 97           |
| S17    | 6.4  | 2        | Spl +   | 14.86  | 0.41  | 7.42  | 43.54 | 0.75 | 5.77  | 1.04  |       |      |      |      |      |    | 0.77 | 24.22 |      | 1.23 |     |      |      |     | 100   | 91           |
| S17    | 6.4  | 3        | Amph    | 54.99  |       | 3.21  | 9.16  |      | 18.25 | 10.60 | 0.54  |      |      |      |      |    |      | 0.25  |      |      |     |      |      |     | 97    | 111          |
| S17    | 7    | 1        | Ep      | 40.17  |       | 23.33 | 10.64 |      |       | 22.86 |       |      |      |      |      |    |      |       |      |      |     |      |      |     | 97    | 109          |
| S17    | 7    | 2        | Qz      | 98.81  |       |       |       |      |       |       |       |      |      |      | 1.19 |    |      |       |      |      |     |      |      |     | 100   | 107          |
| S17    | 7    | 3        | Chr     |        |       | 11.68 | 25.72 |      | 7.34  |       |       |      |      |      |      |    | 0.41 | 54.86 |      |      |     |      |      |     | 100   | 106          |
| S17    | 7    | 4        | Ttn     | 31.61  | 36.63 | 3.76  | 3.29  |      |       | 24.71 |       |      |      |      |      |    |      |       |      |      |     |      |      |     | 100   | 105          |
| S17    | 7    | 5        | Ttn     | 34.90  | 30.09 | 4.65  | 4.20  |      | 0.54  | 25.00 |       | 0.62 |      |      |      |    |      |       |      |      |     |      |      |     | 100   | 103          |
| S17    | 7    | 6        | Chr     |        |       | 12.59 | 23.94 |      | 9.50  |       |       |      |      |      |      |    |      | 53.98 |      |      |     |      |      |     | 100   | 102          |
| S17    | 7    | 7        | Grt     | 39.85  |       | 21.22 | 26.27 | 0.97 | 1.72  | 9.96  |       |      |      |      |      |    |      |       |      |      |     |      |      |     | 100   | 111          |
| S17    | 7    | 8        | Ilm     |        | 54.06 |       | 44.00 | 1.94 |       |       |       |      |      |      |      |    |      |       |      |      |     |      |      |     | 100   | 107          |
| S17    | 7    | 9        | Spl     |        |       | 33.66 | 13.78 |      | 16.30 |       |       |      |      |      |      |    |      | 36.25 |      |      |     |      |      |     | 100   | 114          |
| S17    | 7    | 10       | Ep      | 40.00  |       | 21.82 | 12.38 |      |       | 22.48 |       |      |      |      |      |    | 0.32 |       |      |      |     |      |      |     | 97    | 113          |
| S17    | 7    | 11       | Grt     | 32.03  |       | 3.63  | 10.24 |      | 6.37  | 27.28 |       |      |      | 0.70 |      |    |      | 19.74 |      |      |     |      |      |     | 100   | 104          |
| S17    | 7    | 12       | Chr +   | 11.21  |       | 4.84  | 55.48 | 1.57 | 5.94  | 1.46  |       |      |      |      |      |    |      | 18.27 | 0.50 | 0.73 |     |      |      |     | 100   | 96           |
| S17    | 7    | 13       | Ep      | 40.49  |       | 29.66 | 4.00  | 0.33 |       | 22.52 |       |      |      |      |      |    |      |       |      |      |     |      |      |     | 97    | 107          |
| S17    | 7    | 14       | Spl     |        |       | 43.58 | 15.87 |      | 17.12 |       |       |      |      |      |      |    |      | 23.44 |      |      |     |      |      |     | 100   | 107          |
| S17    | 7    | 15       | Grt     | 39.71  |       | 20.51 | 25.84 | 3.90 | 1.22  | 8.82  |       |      |      |      |      |    |      |       |      |      |     |      |      |     | 100   | 110          |
| S17    | 7    | 16       | Qz      | 100.00 |       |       |       |      |       |       |       |      |      |      |      |    |      |       |      |      |     |      |      |     | 100   | 116          |
| S17    | 7    | 17       | Ep      | 41.96  |       | 24.96 | 8.38  |      | 1.41  | 19.87 | 0.43  |      |      |      |      |    |      |       |      |      |     |      |      |     | 97    | 99           |
| S17    | 7    | 18       | Grt     | 38.45  |       | 1.21  | 25.75 |      | 0.50  | 34.09 |       |      |      |      |      |    |      |       |      |      |     |      |      |     | 100   | 105          |
| S17    | 7    | 19       | Ep      | 42.74  | 0.46  | 22.64 | 6.59  |      | 3.80  | 20.20 | 0.57  |      |      |      |      |    |      |       |      |      |     |      |      |     | 97    | 106          |
| S17    | 7.2  | 1        | Ep      | 40.58  |       | 26.06 | 7.67  |      |       | 22.69 |       |      |      |      |      |    |      |       |      |      |     |      |      |     | 97    | 110          |
| S17    | 7.2  | 2        | Ab      | 67.12  |       | 20.53 |       |      |       | 2.29  | 10.07 |      |      |      |      |    |      |       |      |      |     |      |      |     | 100   | 115          |



Table B9.1: EDS analyses of sample S17.

| Sample | Site | Position | Mineral      | SiO2   | TiO2  | Al2O3 | FeO   | MnO   | MgO   | CaO   | Na2O  | K2O  | P2O5 | SO3 | F     | Cl | V2O5 | Cr2O3 | NiO  | ZnO | SrO | ZrO2 | HfO2 | WO3  | Total | Actual Total |
|--------|------|----------|--------------|--------|-------|-------|-------|-------|-------|-------|-------|------|------|-----|-------|----|------|-------|------|-----|-----|------|------|------|-------|--------------|
| S17    | 7.2  | 3        | Ep + Ab?     | 49.96  |       | 27.09 | 1.15  |       | 1.46  | 17.35 | 3.00  |      |      |     |       |    |      |       |      |     |     |      |      |      | 100   | 105          |
| S17    | 7.2  | 4        | Ab           | 67.21  |       | 20.48 |       |       |       | 1.50  | 10.59 | 0.21 |      |     |       |    |      |       |      |     |     |      |      |      | 100   | 114          |
| S17    | 7.3  | 1        | Tlc          | 61.33  |       | 0.46  | 7.02  | 0.23  | 27.11 | 3.84  |       |      |      |     |       |    |      |       |      |     |     |      |      |      | 100   | 111          |
| S17    | 7.3  | 2        | Tlc          | 65.39  |       | 1.24  | 4.63  |       | 26.92 | 1.43  | 0.39  |      |      |     |       |    |      |       |      |     |     |      |      |      | 100   | 77           |
| S17    | 7.3  | 3        | Tlc          | 66.78  |       | 0.88  | 3.05  |       | 29.29 |       |       |      |      |     |       |    |      |       |      |     |     |      |      |      | 100   | 94           |
| S17    | 7.3  | 4        | Amph         | 57.27  |       | 2.17  | 2.46  |       | 23.03 | 11.07 | 0.66  |      |      |     |       |    |      | 0.34  |      |     |     |      |      |      | 97    | 113          |
| S17    | 8    | 1        | Chr          |        |       | 7.54  | 19.53 |       | 8.89  |       |       |      |      |     |       |    | 0.42 | 63.62 |      |     |     |      |      |      | 100   | 108          |
| S17    | 8    | 2        | Ep           | 40.36  |       | 16.99 | 14.57 |       | 2.72  | 22.37 |       |      |      |     |       |    |      |       |      |     |     |      |      |      | 97    | 95           |
| S17    | 8    | 3        | Qz           | 100.00 |       |       |       |       |       |       |       |      |      |     |       |    |      |       |      |     |     |      |      |      | 100   | 124          |
| S17    | 8    | 4        | Spl          |        |       | 44.00 | 13.81 |       | 18.51 |       |       |      |      |     |       |    |      | 23.69 |      |     |     |      |      |      | 100   | 116          |
| S17    | 8    | 5        | Chr          |        | 0.33  | 16.24 | 22.49 |       | 10.44 |       |       |      |      |     |       |    |      | 50.51 |      |     |     |      |      |      | 100   | 113          |
| S17    | 8    | 6        | Ep +         | 44.18  |       | 19.45 | 15.23 |       | 4.70  | 15.17 | 0.79  | 0.47 |      |     |       |    |      |       |      |     |     |      |      |      | 100   | 82           |
| S17    | 8    | 7        | Amph         | 55.09  | 0.31  | 2.35  | 10.29 |       | 17.07 | 11.45 | 0.45  |      |      |     |       |    |      |       |      |     |     |      |      |      | 97    | 115          |
| S17    | 8    | 8        | Grt          | 39.62  |       | 20.69 | 26.10 | 3.58  | 1.01  | 9.00  |       |      |      |     |       |    |      |       |      |     |     |      |      |      | 100   | 112          |
| S17    | 8    | 9        | Chr          |        |       | 22.66 | 21.52 |       | 11.04 |       |       |      |      |     |       |    | 0.42 | 44.37 |      |     |     |      |      |      | 100   | 107          |
| S17    | 8    | 10       | Grt +        | 40.51  | 1.31  | 17.66 | 3.71  |       | 1.65  | 35.16 |       |      |      |     |       |    |      |       |      |     |     |      |      |      | 100   | 108          |
| S17    | 8    | 11       | Grt          | 39.48  |       | 20.81 | 30.19 | 0.92  | 2.29  | 6.31  |       |      |      |     |       |    |      |       |      |     |     |      |      |      | 100   | 112          |
| S17    | 8    | 12       | ?Ep          | 39.84  |       | 20.48 | 22.50 | 0.81  | 0.36  | 16.01 |       |      |      |     |       |    |      |       |      |     |     |      |      |      | 100   | 111          |
| S17    | 8    | 13       | Grt          | 38.96  |       | 20.88 | 30.24 | 5.53  | 2.64  | 1.75  |       |      |      |     |       |    |      |       |      |     |     |      |      |      | 100   | 110          |
| S17    | 8    | 14       | Qz           | 100.00 |       |       |       |       |       |       |       |      |      |     |       |    |      |       |      |     |     |      |      |      | 100   | 115          |
| S17    | 8    | 15       | Ep           | 40.28  |       | 22.70 | 11.76 | 0.27  | 0.64  | 21.36 |       |      |      |     |       |    |      |       |      |     |     |      |      |      | 97    | 108          |
| S17    | 8    | 16       | Grt          | 39.35  |       | 20.45 | 26.30 | 5.61  | 1.02  | 7.28  |       |      |      |     |       |    |      |       |      |     |     |      |      |      | 100   | 112          |
| S17    | 8    | 17       | Qz           | 96.33  | 0.38  | 1.86  | 0.69  |       | 0.25  |       |       | 0.48 |      |     |       |    |      |       |      |     |     |      |      |      | 100   | 119          |
| S17    | 8.2  | 1        | Fl           |        |       |       |       |       |       | 47.00 |       |      |      |     | 53.00 |    |      |       |      |     |     |      |      |      | 100   | 131          |
| S17    | 8.2  | 2        | Qz           | 99.68  |       |       |       |       |       | 0.32  |       |      |      |     |       |    |      |       |      |     |     |      |      |      | 100   | 120          |
| S17    | 8.2  | 3        | Qz           | 100.00 |       |       |       |       |       |       |       |      |      |     |       |    |      |       |      |     |     |      |      |      | 100   | 120          |
| S17    | 8.2  | 4        | Qz           | 100.00 |       |       |       |       |       |       |       |      |      |     |       |    |      |       |      |     |     |      |      |      | 100   | 119          |
| S17    | 8.2  | 5        | TiO2 ("Ilm") | 0.61   | 99.02 |       | 0.37  |       |       |       |       |      |      |     |       |    |      |       |      |     |     |      |      |      | 100   | 108          |
| S17    | 8.2  | 6        | "Ilm"        | 4.56   | 64.60 |       | 29.47 | 0.77  |       | 0.60  |       |      |      |     |       |    |      |       |      |     |     |      |      |      | 100   | 98           |
| S17    | 8.2  | 7        | TiO2 ("Ilm") | 3.29   | 96.20 |       | 0.51  |       |       |       |       |      |      |     |       |    |      |       |      |     |     |      |      |      | 100   | 107          |
| S17    | 8.2  | 8        | Fl           |        |       |       |       |       | 0.31  | 45.78 |       |      |      |     | 53.91 |    |      |       |      |     |     |      |      |      | 100   | 134          |
| S17    | 8.2  | 9        | Fl           | 2.92   |       | 1.50  | 0.21  |       | 0.33  | 44.79 | 0.50  | 0.11 |      |     | 49.64 |    |      |       |      |     |     |      |      |      | 100   | 131          |
| S17    | 8.3  | 1        | Amph (Ged)   | 43.23  |       | 18.34 | 19.22 | 0.44  | 13.76 | 0.56  | 1.05  | 0.41 |      |     |       |    |      |       |      |     |     |      |      |      | 97    | 96           |
| S17    | 8.3  | 2        | Ep           | 40.37  |       | 22.88 | 11.20 |       |       | 22.54 |       |      |      |     |       |    |      |       |      |     |     |      |      |      | 97    | 109          |
| S17    | 8.3  | 3        | Ab           | 69.22  |       | 18.76 |       |       |       | 0.32  | 11.70 |      |      |     |       |    |      |       |      |     |     |      |      |      | 100   | 120          |
| S17    | 8.3  | 4        | Ttn          | 33.82  | 32.79 | 3.57  | 1.78  |       |       | 28.04 |       |      |      |     |       |    |      |       |      |     |     |      |      |      | 100   | 110          |
| S17    | 8.3  | 5        | Qz           | 100.00 |       |       |       |       |       |       |       |      |      |     |       |    |      |       |      |     |     |      |      |      | 100   | 121          |
| S17    | 8.3  | 6        | Amph (Ged)   | 44.56  |       | 16.32 | 19.20 | 0.35  | 14.18 | 0.77  | 1.33  | 0.30 |      |     |       |    |      |       |      |     |     |      |      |      | 97    | 97           |
| S17    | 9    | 1        | Chr          |        |       | 18.89 | 21.05 |       | 11.73 |       |       |      |      |     |       |    |      | 48.33 |      |     |     |      |      |      | 100   | 109          |
| S17    | 9    | 2        | Chr          |        |       | 26.33 | 15.40 |       | 12.42 |       |       |      |      |     |       |    |      | 45.85 |      |     |     |      |      |      | 100   | 108          |
| S17    | 9    | 3        | Mix          | 32.73  |       | 19.91 | 5.97  | 22.56 | 1.51  | 2.24  | 1.88  | 1.26 |      |     | 7.41  |    |      | 0.38  | 1.47 |     |     |      |      | 2.67 | 100   | 99           |

Table B9.1: EDS analyses of sample S17.

| Sample | Site | Position | Mineral      | SiO2   | TiO2  | Al2O3 | FeO   | MnO  | MgO   | CaO   | Na2O  | K2O   | P2O5  | SO3  | F    | Cl   | V2O5 | Cr2O3 | NiO  | ZnO  | SrO  | ZrO2 | HfO2 | WO3  | Total | Actual Total |
|--------|------|----------|--------------|--------|-------|-------|-------|------|-------|-------|-------|-------|-------|------|------|------|------|-------|------|------|------|------|------|------|-------|--------------|
| S17    | 9    | 4        | Chr          |        |       | 15.82 | 23.81 |      | 10.10 |       |       |       |       |      |      |      |      | 50.27 |      |      |      |      |      |      | 100   | 110          |
| S17    | 9    | 5        | Ep           | 39.51  | 2.48  | 21.75 | 10.23 |      |       | 23.03 |       |       |       |      |      |      |      |       |      |      |      |      |      |      | 97    | 108          |
| S17    | 9    | 6        | Chr          |        |       | 28.07 | 14.83 |      | 15.35 |       |       |       |       |      |      |      |      | 41.75 |      |      |      |      |      |      | 100   | 110          |
| S17    | 9    | 7        | Chr          |        |       | 11.43 | 20.39 |      | 9.26  |       |       |       |       |      |      |      | 0.38 | 58.54 |      |      |      |      |      |      | 100   | 108          |
| S17    | 9    | 8        | Spl          |        |       | 36.62 | 19.48 |      | 14.99 |       |       |       |       |      |      |      | 0.38 | 28.53 |      |      |      |      |      |      | 100   | 108          |
| S17    | 9    | 9        | Opx          | 59.76  |       | 0.55  | 13.52 | 0.46 | 24.69 | 1.02  |       |       |       |      |      |      |      |       |      |      |      |      |      |      | 100   | 109          |
| S17    | 9    | 10       | "Ilm" +      | 15.11  | 52.87 | 0.89  | 20.38 | 0.73 |       | 10.01 |       |       |       |      |      |      |      |       |      |      |      |      |      |      | 100   | 110          |
| S17    | 9    | 11       | Ap           |        |       |       | 0.30  |      |       | 48.92 |       |       | 44.30 |      | 4.93 |      |      |       |      |      |      |      |      | 1.55 | 100   | 123          |
| S17    | 9    | 12       | Ep           | 39.05  |       | 19.87 | 13.49 | 3.89 | 0.37  | 20.33 |       |       |       |      |      |      |      |       |      |      |      |      |      |      | 97    | 114          |
| S17    | 9    | 13       | Qz           | 99.21  |       | 0.35  | 0.45  |      |       |       |       |       |       |      |      |      |      |       |      |      |      |      |      |      | 100   | 124          |
| S17    | 9    | 14       | Spl          |        |       | 28.13 | 23.77 |      | 12.56 |       |       |       |       |      |      |      |      | 35.53 |      |      |      |      |      |      | 100   | 106          |
| S17    | 9    | 15       | Spl          |        | 0.40  | 27.58 | 20.21 |      | 14.18 |       |       |       |       |      |      |      |      | 37.63 |      |      |      |      |      |      | 100   | 106          |
| S17    | 9    | 16       | Chr          |        |       | 20.78 | 26.42 |      | 10.67 |       |       |       |       |      |      |      |      | 42.13 |      |      |      |      |      |      | 100   | 104          |
| S17    | 9    | 17       | Ep           | 40.36  |       | 26.37 | 7.45  | 0.38 |       | 22.45 |       |       |       |      |      |      |      |       |      |      |      |      |      |      | 97    | 104          |
| S17    | 9    | 18       | Feohy +      | 5.96   |       | 8.51  | 82.03 |      | 0.55  | 0.79  |       |       | 2.15  |      |      |      |      |       |      |      |      |      |      |      | 100   | 69           |
| S17    | 9    | 19       | Ep           | 45.80  |       | 28.32 | 1.99  |      |       | 20.88 |       |       |       |      |      |      |      |       |      |      |      |      |      |      | 97    | 109          |
| S17    | 9    | 20       | Spl          |        |       | 31.75 | 15.70 |      | 15.66 |       |       |       |       |      |      |      |      | 36.88 |      |      |      |      |      |      | 100   | 109          |
| S17    | 9    | 21       | Grt          | 39.56  |       | 20.66 | 26.81 | 2.35 | 1.27  | 9.35  |       |       |       |      |      |      |      |       |      |      |      |      |      |      | 100   | 117          |
| S17    | 9    | 22       | Ep           | 39.99  |       | 21.99 | 12.66 |      |       | 22.36 |       |       |       |      |      |      |      |       |      |      |      |      |      |      | 97    | 103          |
| S17    | 9    | 23       | Qz +         | 93.23  |       |       |       |      |       | 3.09  |       |       | 3.68  |      |      |      |      |       |      |      |      |      |      |      | 100   | 116          |
| S17    | 9    | 24       | Ep           | 40.73  |       | 27.78 | 1.78  |      |       | 24.72 | 0.97  |       |       |      | 1.02 |      |      |       |      |      |      |      |      |      | 97    | 70           |
| S17    | 9    | 25       | Spl +        | 24.26  |       | 15.31 | 12.29 |      | 28.89 |       | 0.43  |       |       |      |      |      |      | 18.42 |      | 0.40 |      |      |      |      | 100   | 110          |
| S17    | 9    | 26       | Ep           | 40.78  |       | 28.01 | 5.39  | 0.33 |       | 22.48 |       |       |       |      |      |      |      |       |      |      |      |      |      |      | 97    | 105          |
| S17    | 9.2  | 1        | Grt          | 28.59  |       | 2.16  | 8.74  |      | 1.58  | 37.25 |       |       |       | 1.64 |      |      |      | 20.04 |      |      |      |      |      |      | 100   | 99           |
| S17    | 9.2  | 2        | Mix          | 32.72  |       | 6.35  | 15.15 | 0.81 | 27.31 | 0.33  | 0.64  |       |       |      |      | 0.38 |      | 15.71 | 0.60 |      |      |      |      |      | 100   | 95           |
| S17    | 9.2  | 3        | Grt          | 32.46  |       | 3.28  | 21.78 |      | 4.62  | 27.70 |       |       |       |      |      |      |      | 10.16 |      |      |      |      |      |      | 100   | 62           |
| S17    | 9.2  | 4        | Amph         | 35.49  |       | 4.34  | 12.21 |      | 19.81 | 12.36 |       |       |       |      |      | 0.74 |      | 12.06 |      |      |      |      |      |      | 97    | 79           |
| S17    | 9.3  | 1        | Ab           | 69.67  |       | 18.64 |       |      |       | 0.33  | 11.37 |       |       |      |      |      |      |       |      |      |      |      |      |      | 100   | 116          |
| S17    | 9.3  | 2        | Ep +         | 46.78  |       | 23.15 | 4.46  |      | 3.07  | 18.56 | 0.97  |       |       |      |      |      |      |       |      |      |      |      |      |      | 97    | 100          |
| S17    | 9.3  | 3        | Amph (Ged) + | 41.29  |       | 18.54 | 12.04 |      | 13.84 | 8.05  | 2.32  | 0.92  |       |      |      |      |      |       |      |      |      |      |      |      | 97    | 94           |
| S17    | 9.4  | 1        | Ab           | 69.84  |       | 18.50 |       |      |       | 0.30  | 11.36 |       |       |      |      |      |      |       |      |      |      |      |      |      | 100   | 116          |
| S17    | 9.4  | 2        | Ep           | 40.34  |       | 27.47 | 6.40  | 0.24 |       | 22.54 |       |       |       |      |      |      |      |       |      |      |      |      |      |      | 97    | 110          |
| S17    | 9.4  | 3        | Ttn          | 32.56  | 35.04 | 2.90  |       |      |       | 27.77 |       |       |       |      | 1.73 |      |      |       |      |      |      |      |      |      | 100   | 111          |
| S17    | 9.4  | 4        | Kfs +        | 60.10  |       | 19.80 | 1.99  |      |       | 6.71  | 0.29  | 11.11 |       |      |      |      |      |       |      |      |      |      |      |      | 100   | 102          |
| S17    | 10   | 1        | Ap           | 1.37   |       |       |       |      |       | 47.39 | 1.14  |       | 43.26 |      | 3.53 |      |      |       |      |      | 3.13 |      |      | 0.18 | 100   | 108          |
| S17    | 10   | 2        | Ap           |        |       |       |       |      |       | 46.81 | 1.04  |       | 41.96 |      | 4.74 |      |      |       |      |      |      |      |      | 5.44 | 100   | 81           |
| S17    | 10   | 3        | Chr          |        |       | 16.90 | 19.76 |      | 11.39 |       |       |       |       |      |      |      | 0.37 | 51.58 |      |      |      |      |      |      | 100   | 112          |
| S17    | 10   | 4        | Ilm          |        | 51.71 |       | 47.19 | 1.10 |       |       |       |       |       |      |      |      |      |       |      |      |      |      |      |      | 100   | 106          |
| S17    | 10   | 5        | Ep           | 41.59  |       | 28.90 | 4.64  | 0.27 |       | 2.22  | 18.98 | 0.40  |       |      |      |      |      |       |      |      |      |      |      |      | 97    | 112          |
| S17    | 10   | 6        | Ep           | 40.29  |       | 23.90 | 10.03 |      |       | 22.78 |       |       |       |      |      |      |      |       |      |      |      |      |      |      | 97    | 107          |
| S17    | 10   | 7        | Qz           | 100.00 |       |       |       |      |       |       |       |       |       |      |      |      |      |       |      |      |      |      |      |      | 100   | 117          |

Table B9.1: EDS analyses of sample S17.

| Sample | Site | Position | Mineral | SiO2   | TiO2  | Al2O3 | FeO   | MnO   | MgO   | CaO   | Na2O  | K2O  | P2O5  | SO3  | F     | Cl | V2O5 | Cr2O3 | NiO  | ZnO | SrO | ZrO2 | HfO2 | WO3  | Total | Actual Total |
|--------|------|----------|---------|--------|-------|-------|-------|-------|-------|-------|-------|------|-------|------|-------|----|------|-------|------|-----|-----|------|------|------|-------|--------------|
| S17    | 10   | 8        | Grt     | 39.42  |       | 20.65 | 32.99 | 2.58  | 2.04  | 2.33  |       |      |       |      |       |    |      |       |      |     |     |      |      |      | 100   | 110          |
| S17    | 10   | 9        | Chr     | 0.67   | 0.58  | 4.02  | 29.56 |       | 2.89  |       |       |      |       |      |       |    | 0.80 | 61.49 |      |     |     |      |      |      | 100   | 99           |
| S17    | 10   | 10       | Chr     |        | 0.88  | 22.78 | 25.22 |       | 10.55 |       |       |      |       |      |       |    | 0.51 | 40.06 |      |     |     |      |      |      | 100   | 106          |
| S17    | 10   | 11       | Grt     | 39.19  |       | 20.56 | 27.41 | 4.25  | 1.48  | 7.12  |       |      |       |      |       |    |      |       |      |     |     |      |      |      | 100   | 113          |
| S17    | 10   | 12       | Ep      | 40.47  |       | 25.41 | 8.66  |       |       | 22.46 |       |      |       |      |       |    |      |       |      |     |     |      |      |      | 97    | 104          |
| S17    | 10   | 13       | Ep      | 37.84  |       | 23.01 | 11.37 |       |       | 24.78 |       |      |       |      |       |    |      |       |      |     |     |      |      |      | 97    | 71           |
| S17    | 10   | 14       | Ep      | 41.46  |       | 21.72 | 10.60 |       |       | 22.59 | 0.63  |      |       |      |       |    |      |       |      |     |     |      |      |      | 97    | 43           |
| S17    | 10   | 15       | Grt     | 40.12  |       | 21.07 | 28.06 | 0.31  | 4.35  | 6.09  |       |      |       |      |       |    |      |       |      |     |     |      |      |      | 100   | 110          |
| S17    | 10   | 16       | Ep      | 40.08  |       | 20.75 | 13.98 |       |       | 22.19 |       |      |       |      |       |    |      |       |      |     |     |      |      |      | 97    | 103          |
| S17    | 10   | 17       | Grt     | 39.96  |       | 20.99 | 30.16 | 0.77  | 5.10  | 3.02  |       |      |       |      |       |    |      |       |      |     |     |      |      |      | 100   | 113          |
| S17    | 10   | 18       | Ep      | 41.48  |       | 27.94 | 1.87  |       | 2.63  | 23.08 |       |      |       |      |       |    |      |       |      |     |     |      |      |      | 97    | 108          |
| S17    | 10   | 19       | Chr     |        |       | 21.06 | 20.81 |       | 13.42 |       |       |      |       |      |       |    | 0.45 | 44.26 |      |     |     |      |      |      | 100   | 110          |
| S17    | 10   | 20       | "Ilm"   |        | 58.30 |       | 40.35 | 1.35  |       |       |       |      |       |      |       |    |      |       |      |     |     |      |      |      | 100   | 99           |
| S17    | 10   | 21       | Grt     | 39.67  |       | 21.05 | 31.05 | 1.69  | 2.88  | 3.65  |       |      |       |      |       |    |      |       |      |     |     |      |      |      | 100   | 117          |
| S17    | 10.2 | 1        | Chr +   | 3.37   | 0.60  | 7.71  | 28.76 | 1.06  | 6.42  |       | 1.14  |      |       |      |       |    | 0.62 | 50.31 |      |     |     |      |      |      | 100   | 106          |
| S17    | 10.2 | 2        | Cr-Chl  | 33.06  |       | 14.88 | 2.74  |       | 32.04 |       | 0.33  |      |       |      |       |    |      | 1.95  |      |     |     |      |      |      | 85    | 101          |
| S17    | 10.2 | 3        | Cr-Chl  | 32.10  |       | 13.74 | 3.82  |       | 30.73 |       | 0.33  |      |       |      |       |    |      | 4.29  |      |     |     |      |      |      | 85    | 98           |
| S17    | 10.3 | 1        | Mnohy   | 7.63   | 0.61  | 7.19  | 7.04  | 38.54 | 0.82  | 3.27  | 3.45  | 0.32 |       |      | 27.78 |    |      | 0.79  | 2.56 |     |     |      |      |      | 100   | 44           |
| S17    | 10.3 | 2        | Ilm +   | 9.18   | 50.55 | 1.41  | 27.99 | 2.76  |       | 8.11  |       |      |       |      |       |    |      |       |      |     |     |      |      |      | 100   | 57           |
| S17    | 10.3 | 3        | Ttn + ? | 21.93  | 42.97 | 1.69  | 11.60 | 5.62  |       | 15.35 |       |      |       |      |       |    | 0.84 |       |      |     |     |      |      |      | 100   | 104          |
| S17    | 10.4 | 1        | Qz      | 100.00 |       |       |       |       |       |       |       |      |       |      |       |    |      |       |      |     |     |      |      |      | 100   | 121          |
| S17    | 10.4 | 2        | Qz      | 98.05  |       | 0.70  | 0.48  |       | 0.30  |       |       |      |       | 0.46 |       |    |      |       |      |     |     |      |      |      | 100   | 118          |
| S17    | 10.4 | 3        | Ep      | 39.63  |       | 23.32 | 11.28 |       |       | 22.77 |       |      |       |      |       |    |      |       |      |     |     |      |      |      | 97    | 108          |
| S17    | 10.4 | 4        | TiO2 +  | 10.57  | 75.90 | 3.90  | 2.49  |       | 2.05  | 1.81  | 0.55  | 0.18 |       |      | 2.54  |    |      |       |      |     |     |      |      |      | 100   | 103          |
| S17    | 11   | 1        | Chr     |        |       | 24.98 | 23.41 |       | 10.06 |       |       |      |       |      |       |    |      | 41.55 |      |     |     |      |      |      | 100   | 102          |
| S17    | 11   | 2        | Chl ?   | 24.85  | 0.53  | 15.82 | 38.82 | 0.73  | 1.14  | 0.53  | 0.75  | 0.58 | 0.93  |      |       |    |      | 0.33  |      |     |     |      |      |      | 85    | 67           |
| S17    | 11   | 3        | Ep      | 40.51  |       | 29.23 | 4.44  |       |       | 22.82 |       |      |       |      |       |    |      |       |      |     |     |      |      |      | 97    | 106          |
| S17    | 11   | 4        | Qz      | 100.00 |       |       |       |       |       |       |       |      |       |      |       |    |      |       |      |     |     |      |      |      | 100   | 117          |
| S17    | 11   | 5        | Ttn     | 32.71  | 33.68 | 3.76  | 2.56  |       |       | 27.28 |       |      |       |      |       |    |      |       |      |     |     |      |      |      | 100   | 107          |
| S17    | 11   | 6        | Ab      | 68.08  |       | 19.67 |       |       |       | 0.84  | 11.16 | 0.25 |       |      |       |    |      |       |      |     |     |      |      |      | 100   | 116          |
| S17    | 11   | 7        | Ep      | 40.68  |       | 24.74 | 8.64  |       |       | 22.93 |       |      |       |      |       |    |      |       |      |     |     |      |      |      | 97    | 108          |
| S17    | 11   | 8        | Chr     |        |       | 25.20 | 21.11 |       | 12.26 |       |       |      |       |      |       |    |      | 41.42 |      |     |     |      |      |      | 100   | 107          |
| S17    | 11   | 9        | Spl     |        |       | 46.40 | 13.36 |       | 18.64 |       |       |      |       |      |       |    |      | 21.60 |      |     |     |      |      |      | 100   | 109          |
| S17    | 11   | 10       | Ttn     | 33.96  | 32.68 | 4.38  | 0.55  |       |       | 26.88 |       |      |       |      | 1.55  |    |      |       |      |     |     |      |      |      | 100   | 106          |
| S17    | 11   | 11       | Spl     |        | 0.36  | 29.46 | 19.17 |       | 14.32 |       |       |      |       |      |       |    |      | 36.69 |      |     |     |      |      |      | 100   | 111          |
| S17    | 11   | 12       | Spl     |        |       | 46.00 | 14.54 |       | 17.76 |       |       |      |       |      |       |    | 0.30 | 21.39 |      |     |     |      |      |      | 100   | 113          |
| S17    | 11   | 13       | Ep      | 40.02  |       | 23.70 | 10.58 |       |       | 22.70 |       |      |       |      |       |    |      |       |      |     |     |      |      |      | 97    | 111          |
| S17    | 11   | 14       | Ap      | 1.92   |       | 0.91  | 0.51  |       |       | 46.89 | 1.26  | 0.25 | 34.16 | 2.93 | 9.47  |    |      |       |      |     |     |      |      | 1.69 | 100   | 79           |
| S17    | 11   | 15       | Chr     |        |       | 9.30  | 24.29 |       | 8.75  |       |       |      |       |      |       |    | 0.49 | 57.17 |      |     |     |      |      |      | 100   | 103          |
| S17    | 11   | 16       | Chr     | 3.29   | 0.39  | 3.93  | 50.79 |       | 4.44  |       |       |      |       |      |       |    | 0.38 | 36.77 |      |     |     |      |      |      | 100   | 102          |
| S17    | 11   | 17       | Ep      | 40.92  |       | 23.77 | 10.34 |       |       | 21.51 | 0.45  |      |       |      |       |    |      |       |      |     |     |      |      |      | 97    | 102          |

Table B9.1: EDS analyses of sample S17.

| Sample | Site | Position | Mineral    | SiO2   | TiO2  | Al2O3 | FeO   | MnO  | MgO   | CaO   | Na2O  | K2O  | P2O5  | SO3 | F    | Cl | V2O5 | Cr2O3 | NiO | ZnO | SrO | ZrO2  | HfO2 | WO3  | Total | Actual Total |
|--------|------|----------|------------|--------|-------|-------|-------|------|-------|-------|-------|------|-------|-----|------|----|------|-------|-----|-----|-----|-------|------|------|-------|--------------|
| S17    | 11   | 18       | Chr        |        |       | 16.21 | 22.75 |      | 9.94  |       |       |      |       |     |      |    |      | 51.10 |     |     |     |       |      |      | 100   | 113          |
| S17    | 11   | 19       | Grt        | 39.93  |       | 21.14 | 31.42 | 0.62 | 3.78  | 3.10  |       |      |       |     |      |    |      |       |     |     |     |       |      |      | 100   | 109          |
| S17    | 11   | 20       | Cpx + Qz   | 61.01  |       |       | 2.78  |      | 23.78 | 12.43 |       |      |       |     |      |    |      |       |     |     |     |       |      |      | 100   | 110          |
| S17    | 11   | 21       | Spl        |        | 0.63  | 33.61 | 16.04 |      | 14.90 |       |       |      |       |     |      |    |      | 34.82 |     |     |     |       |      |      | 100   | 103          |
| S17    | 11.2 | 1        | Ged        | 44.40  | 1.10  | 17.55 | 19.31 |      | 11.22 | 0.57  | 1.93  | 0.91 |       |     |      |    |      |       |     |     |     |       |      |      | 97    | 88           |
| S17    | 11.2 | 2        | Ab         | 68.47  | 0.30  | 19.30 |       |      |       | 0.67  | 10.97 | 0.29 |       |     |      |    |      |       |     |     |     |       |      |      | 100   | 115          |
| S17    | 11.2 | 3        | Ttn        | 32.67  | 31.59 | 5.29  |       |      |       | 27.52 |       |      |       |     | 2.92 |    |      |       |     |     |     |       |      |      | 100   | 115          |
| S17    | 11.2 | 4        | TiO2       | 0.76   | 98.56 |       |       |      |       | 0.68  |       |      |       |     |      |    |      |       |     |     |     |       |      |      | 100   | 109          |
| S17    | 11.2 | 5        | Ttn        | 32.67  | 32.94 | 4.86  |       |      |       | 27.57 |       |      |       |     | 1.97 |    |      |       |     |     |     |       |      |      | 100   | 113          |
| S17    | 11.2 | 6        | TiO2 +     | 1.23   | 97.77 | 0.35  |       |      |       | 0.65  |       |      |       |     |      |    |      |       |     |     |     |       |      |      | 100   | 109          |
| S17    | 11.3 | 1        | Ep         | 39.98  |       | 25.22 | 8.92  |      |       | 22.87 |       |      |       |     |      |    |      |       |     |     |     |       |      |      | 97    | 111          |
| S17    | 11.3 | 2        | Qz         | 100.00 |       |       |       |      |       |       |       |      |       |     |      |    |      |       |     |     |     |       |      |      | 100   | 122          |
| S17    | 12   | 1        | Zrn        | 30.83  |       |       |       |      |       |       |       |      |       |     |      |    |      |       |     |     |     | 67.69 | 1.48 |      | 100   | 127          |
| S17    | 12   | 2        | Zrn        | 30.94  |       |       |       |      |       |       |       |      |       |     |      |    |      |       |     |     |     | 69.06 |      |      | 100   | 117          |
| S17    | 12   | 3        | Spl        |        |       | 39.23 | 16.09 |      | 15.81 |       |       |      |       |     |      |    |      | 28.86 |     |     |     |       |      |      | 100   | 107          |
| S17    | 12   | 4        | Ilm        |        | 54.85 |       | 35.70 | 9.45 |       |       |       |      |       |     |      |    |      |       |     |     |     |       |      |      | 100   | 105          |
| S17    | 12   | 5        | Chr        |        |       | 13.24 | 24.37 |      | 8.40  |       |       |      |       |     |      |    | 0.36 | 53.64 |     |     |     |       |      |      | 100   | 103          |
| S17    | 12   | 6        | Grt        | 39.70  |       | 20.63 | 28.11 | 1.82 | 1.47  | 8.27  |       |      |       |     |      |    |      |       |     |     |     |       |      |      | 100   | 110          |
| S17    | 12   | 7        | Chr        |        |       | 26.99 | 17.76 |      | 12.98 |       |       |      |       |     |      |    | 0.38 | 41.89 |     |     |     |       |      |      | 100   | 103          |
| S17    | 12   | 8        | Ep         | 40.19  |       | 27.59 | 6.19  |      |       | 23.04 |       |      |       |     |      |    |      |       |     |     |     |       |      |      | 97    | 106          |
| S17    | 12   | 9        | Ep + Ab    | 48.89  |       | 27.97 | 1.19  |      |       | 17.15 | 3.65  |      |       |     | 1.15 |    |      |       |     |     |     |       |      |      | 100   | 95           |
| S17    | 12   | 10       | Spl        |        |       | 41.75 | 16.36 |      | 16.46 |       |       |      |       |     |      |    |      | 25.43 |     |     |     |       |      |      | 100   | 106          |
| S17    | 12   | 11       | Spl        |        |       | 38.04 | 14.94 |      | 17.52 |       |       |      |       |     |      |    |      | 29.49 |     |     |     |       |      |      | 100   | 111          |
| S17    | 12   | 12       | Grt        | 39.62  |       | 20.85 | 25.74 | 4.09 | 1.20  | 8.51  |       |      |       |     |      |    |      |       |     |     |     |       |      |      | 100   | 112          |
| S17    | 12   | 13       | Chr        |        |       | 14.19 | 23.91 |      | 9.79  |       |       |      |       |     |      |    |      | 52.11 |     |     |     |       |      |      | 100   | 111          |
| S17    | 12   | 14       | Chr        |        |       | 19.63 | 23.71 |      | 10.89 |       |       |      |       |     |      |    | 0.48 | 45.30 |     |     |     |       |      |      | 100   | 113          |
| S17    | 12   | 15       | Spl        |        |       | 30.46 | 14.66 |      | 15.52 |       |       |      |       |     |      |    |      | 39.36 |     |     |     |       |      |      | 100   | 114          |
| S17    | 12   | 16       | Ep         | 39.80  |       | 22.64 | 11.64 |      |       | 22.92 |       |      |       |     |      |    |      |       |     |     |     |       |      |      | 97    | 112          |
| S17    | 12   | 17       | Ep         | 41.07  |       | 24.79 | 7.43  | 0.53 | 3.45  | 19.30 | 0.42  |      |       |     |      |    |      |       |     |     |     |       |      |      | 97    | 101          |
| S17    | 12   | 18       | Ep         | 40.68  |       | 25.95 | 7.86  |      |       | 22.51 |       |      |       |     |      |    |      |       |     |     |     |       |      |      | 97    | 110          |
| S17    | 12   | 19       | Qz         | 97.31  |       | 1.60  |       |      |       |       | 1.10  |      |       |     |      |    |      |       |     |     |     |       |      |      | 100   | 116          |
| S17    | 12   | 20       | Grt        | 39.68  |       | 21.03 | 32.10 |      | 4.35  | 2.85  |       |      |       |     |      |    |      |       |     |     |     |       |      |      | 100   | 111          |
| S17    | 12   | 21       | Ep         | 40.09  |       | 24.33 | 9.79  |      |       | 22.80 |       |      |       |     |      |    |      |       |     |     |     |       |      |      | 97    | 105          |
| S17    | 12   | 22       | Mix        | 40.86  |       | 19.30 | 23.62 |      | 14.23 |       | 1.63  | 0.36 |       |     |      |    |      |       |     |     |     |       |      |      | 100   | 96           |
| S17    | 12   | 23       | Amph       | 53.39  | 0.35  | 4.00  | 10.96 | 0.35 | 16.57 | 10.67 | 0.71  |      |       |     |      |    |      |       |     |     |     |       |      |      | 97    | 118          |
| S17    | 12   | 24       | Spl        |        |       | 39.46 | 17.12 |      | 16.21 |       |       |      |       |     |      |    |      | 27.21 |     |     |     |       |      |      | 100   | 113          |
| S17    | 12.2 | 1        | Ep         | 39.89  |       | 22.65 | 11.59 |      |       | 22.87 |       |      |       |     |      |    |      |       |     |     |     |       |      |      | 97    | 108          |
| S17    | 12.2 | 2        | Amph (Ged) | 40.16  |       | 20.66 | 22.46 | 0.37 | 11.90 |       | 0.54  | 0.90 |       |     |      |    |      |       |     |     |     |       |      |      | 97    | 95           |
| S17    | 12.2 | 3        | Ab         | 69.75  |       | 18.80 |       |      |       |       | 11.45 |      |       |     |      |    |      |       |     |     |     |       |      |      | 100   | 117          |
| S17    | 12.2 | 4        | Ttn        | 32.80  | 37.11 | 1.38  | 0.93  |      |       | 27.78 |       |      |       |     |      |    |      |       |     |     |     |       |      |      | 100   | 112          |
| S17    | 12.2 | 5        | Ap         |        |       |       |       |      |       | 49.82 |       |      | 44.62 |     | 4.11 |    |      |       |     |     |     |       |      | 1.45 | 100   | 123          |

Table B9.1: EDS analyses of sample S17.

| Sample | Site | Position | Mineral                                 | SiO2  | TiO2  | Al2O3 | FeO   | MnO  | MgO  | CaO   | Na2O | K2O  | P2O5 | SO3 | F    | Cl | V2O5 | Cr2O3 | NiO | ZnO | SrO | ZrO2 | HfO2 | WO3 | Total | Actual Total |
|--------|------|----------|-----------------------------------------|-------|-------|-------|-------|------|------|-------|------|------|------|-----|------|----|------|-------|-----|-----|-----|------|------|-----|-------|--------------|
| S17    | 12.2 | 6        | Ttn + TiO2                              | 12.93 | 74.33 |       | 1.42  |      |      | 11.33 |      |      |      |     |      |    |      |       |     |     |     |      |      |     | 100   | 110          |
| S17    | 12.2 | 7        | "Ilm"                                   |       | 65.01 |       | 28.74 | 5.15 |      | 1.10  |      |      |      |     |      |    |      |       |     |     |     |      |      |     | 100   | 101          |
| S17    | 12.2 | 8        | Ms +                                    | 49.84 |       | 24.04 | 8.82  |      | 6.85 | 3.11  | 0.65 | 6.68 |      |     |      |    |      |       |     |     |     |      |      |     | 100   | 93           |
| S17    | 12.2 | 9        | Olig                                    | 63.54 |       | 23.02 |       |      |      | 4.72  | 8.71 |      |      |     |      |    |      |       |     |     |     |      |      |     | 100   | 118          |
| S17    | 12.2 | 10       | Ttn + TiO2                              | 19.30 | 56.32 | 1.06  | 6.98  | 1.31 |      | 15.04 |      |      |      |     |      |    |      |       |     |     |     |      |      |     | 100   | 111          |
| S17    | 12.2 | 11       | Ilm                                     |       | 68.60 |       | 26.19 | 4.69 |      | 0.52  |      |      |      |     |      |    |      |       |     |     |     |      |      |     | 100   | 100          |
| S17    | 12.3 | 1        | Amph +                                  | 42.34 | 7.81  | 12.03 | 13.00 |      | 7.09 | 10.50 | 2.15 | 0.73 | 4.35 |     |      |    |      |       |     |     |     |      |      |     | 100   | 70           |
| S17    | 12.3 | 2        | Ttn +                                   | 26.99 | 46.54 | 2.37  | 3.43  |      |      | 20.66 |      |      |      |     |      |    |      |       |     |     |     |      |      |     | 100   | 93           |
| S17    | 12.3 | 3        | Ttn + TiO2 +                            | 22.68 | 52.84 | 8.71  | 10.26 | 0.59 | 1.02 | 2.92  | 0.98 |      |      |     |      |    |      |       |     |     |     |      |      |     | 100   | 77           |
| S17    | 12.3 | 4        | Ilm +                                   | 12.86 | 44.27 | 0.95  | 20.86 | 9.66 |      | 11.39 |      |      |      |     |      |    |      |       |     |     |     |      |      |     | 100   | 109          |
| S17    | 12.3 | 5        | Ttn                                     | 32.09 | 32.61 | 3.89  | 1.81  | 0.41 |      | 26.73 |      |      |      |     | 1.75 |    | 0.72 |       |     |     |     |      |      |     | 100   | 111          |
|        |      |          |                                         |       |       |       |       |      |      |       |      |      |      |     |      |    |      |       |     |     |     |      |      |     |       |              |
|        |      |          | Notes                                   |       |       |       |       |      |      |       |      |      |      |     |      |    |      |       |     |     |     |      |      |     |       |              |
|        |      |          | " " = indicates that mineral is altered |       |       |       |       |      |      |       |      |      |      |     |      |    |      |       |     |     |     |      |      |     |       |              |
|        |      |          | + = indicates other minerals present    |       |       |       |       |      |      |       |      |      |      |     |      |    |      |       |     |     |     |      |      |     |       |              |
|        |      |          |                                         |       |       |       |       |      |      |       |      |      |      |     |      |    |      |       |     |     |     |      |      |     |       |              |
|        |      |          |                                         |       |       |       |       |      |      |       |      |      |      |     |      |    |      |       |     |     |     |      |      |     |       |              |



Table B9.2: EDS analyses of sample 17.

| Sample | Site | Position | Mineral | SiO2  | TiO2  | Al2O3 | FeO   | MnO  | MgO   | CaO   | Na2O | K2O  | P2O5  | SO3  | F    | Cl | V2O5 | Cr2O3 | NiO | ZnO  | ZrO2 | HfO2 | WO3  | Total | Actual Total |
|--------|------|----------|---------|-------|-------|-------|-------|------|-------|-------|------|------|-------|------|------|----|------|-------|-----|------|------|------|------|-------|--------------|
| S17    | 13   | 1        | Chr     |       |       | 7.25  | 32.67 |      | 5.92  |       |      |      |       |      |      |    |      | 54.16 |     |      |      |      |      | 100   | 108          |
| S17    | 13   | 2        | Chr     | 14.60 | 0.92  | 4.92  | 39.12 | 2.74 | 9.38  | 0.85  | 1.00 |      |       |      |      |    |      | 25.82 |     | 0.65 |      |      |      | 100   | 98           |
| S17    | 13   | 3        | Grt     | 39.64 |       | 21.06 | 32.57 |      | 3.14  | 3.60  |      |      |       |      |      |    |      |       |     |      |      |      |      | 100   | 114          |
| S17    | 13   | 4        | Grt     | 34.80 |       | 17.47 | 29.19 | 1.20 | 2.31  | 14.66 | 0.36 |      |       |      |      |    |      |       |     |      |      |      |      | 100   | 72           |
| S17    | 13   | 5        | Spl     |       |       | 26.37 | 16.23 |      | 14.49 |       |      |      |       |      |      |    |      | 42.91 |     |      |      |      |      | 100   | 108          |
| S17    | 13   | 6        | Chr     |       |       | 5.47  | 23.48 |      | 8.39  |       |      |      |       |      |      |    |      | 62.66 |     |      |      |      |      | 100   | 105          |
| S17    | 13   | 7        | Spl     |       | 0.65  | 34.25 | 18.88 |      | 15.64 |       |      |      |       |      |      |    |      | 30.57 |     |      |      |      |      | 100   | 104          |
| S17    | 13   | 8        | Ilm     |       | 51.24 |       | 46.82 | 1.21 | 0.74  |       |      |      |       |      |      |    |      |       |     |      |      |      |      | 100   | 102          |
| S17    | 13   | 9        | Chr     |       |       | 20.91 | 15.65 |      | 9.30  |       |      |      |       |      |      |    |      | 54.14 |     |      |      |      |      | 100   | 104          |
| S17    | 13   | 10       | Ep      | 40.52 |       | 23.88 | 10.27 |      |       | 22.33 |      |      |       |      |      |    |      |       |     |      |      |      |      | 97    | 108          |
| S17    | 13   | 11       | Ep      | 39.92 |       | 24.87 | 9.30  | 0.71 |       | 22.20 |      |      |       |      |      |    |      |       |     |      |      |      |      | 97    | 109          |
| S17    | 13   | 12       | Chr     |       |       | 16.43 | 16.09 |      | 11.78 |       |      |      |       |      |      |    |      | 55.70 |     |      |      |      |      | 100   | 111          |
| S17    | 13   | 13       | Feohy + | 9.28  |       | 14.46 | 70.60 | 0.44 | 0.73  | 1.09  |      |      | 3.02  |      |      |    |      | 0.39  |     |      |      |      |      | 100   | 83           |
| S17    | 13   | 14       | Grt     | 39.50 |       | 20.94 | 30.80 | 1.47 | 2.04  | 5.26  |      |      |       |      |      |    |      |       |     |      |      |      |      | 100   | 115          |
| S17    | 13   | 15       | Amph    | 58.37 |       | 1.02  | 2.43  |      | 23.63 | 11.14 | 0.42 |      |       |      |      |    |      |       |     |      |      |      |      | 97    | 115          |
| S17    | 13   | 16       | Spl     |       |       | 42.97 | 15.19 |      | 15.03 |       |      |      |       |      |      |    |      | 26.81 |     |      |      |      |      | 100   | 105          |
| S17    | 13   | 17       | Chr     |       |       | 15.17 | 24.57 |      | 10.34 |       |      |      |       |      |      |    |      | 49.92 |     |      |      |      |      | 100   | 112          |
| S17    | 13   | 18       | Ep      | 43.62 |       | 20.84 | 9.68  |      | 2.46  | 18.71 | 0.41 | 1.28 |       |      |      |    |      |       |     |      |      |      |      | 97    | 102          |
| S17    | 14   | 1        | Chr     |       |       | 18.20 | 19.76 |      | 11.37 |       |      |      |       |      |      |    |      | 50.66 |     |      |      |      |      | 100   | 108          |
| S17    | 14   | 2        | Ep      | 39.98 |       | 23.97 | 10.83 |      |       | 22.22 |      |      |       |      |      |    |      |       |     |      |      |      |      | 97    | 106          |
| S17    | 14   | 3        | Grt     | 39.83 |       | 21.14 | 32.15 | 0.65 | 5.12  | 1.12  |      |      |       |      |      |    |      |       |     |      |      |      |      | 100   | 110          |
| S17    | 14   | 4        | Grt     | 40.65 |       | 21.65 | 26.12 | 0.50 | 7.89  | 3.18  |      |      |       |      |      |    |      |       |     |      |      |      |      | 100   | 108          |
| S17    | 14   | 5        | Spl     |       | 0.50  | 31.40 | 19.67 |      | 14.18 |       |      |      |       |      |      |    |      | 34.25 |     |      |      |      |      | 100   | 104          |
| S17    | 14   | 6        | Feohy + | 7.36  | 0.51  | 13.01 | 71.19 |      | 0.76  | 0.79  |      |      | 2.33  |      |      |    |      | 0.84  |     |      |      |      | 3.20 | 100   | 63           |
| S17    | 14   | 7        | Ap +    | 7.39  |       | 3.29  | 0.48  |      | 0.64  | 42.70 | 0.93 | 0.87 | 32.50 | 1.55 | 9.66 |    |      |       |     |      |      |      |      | 100   | 110          |
| S17    | 14   | 8        | Ep      | 40.26 |       | 26.20 | 7.77  |      |       | 22.77 |      |      |       |      |      |    |      |       |     |      |      |      |      | 97    | 106          |
| S17    | 14   | 9        | Chr     |       |       | 12.89 | 19.89 |      | 10.09 |       |      |      |       |      |      |    | 0.39 | 56.74 |     |      |      |      |      | 100   | 104          |
| S17    | 14   | 10       | Chr     |       |       | 13.61 | 19.27 |      | 10.30 |       |      |      |       |      |      |    | 0.36 | 56.47 |     |      |      |      |      | 100   | 103          |
| S17    | 14   | 11       | Chr     |       |       | 14.96 | 22.35 |      | 10.14 |       |      |      |       |      |      |    |      | 52.55 |     |      |      |      |      | 100   | 108          |
| S17    | 14   | 12       | Chr     |       | 1.11  | 26.98 | 20.77 |      | 15.28 |       |      |      |       |      |      |    |      | 35.86 |     |      |      |      |      | 100   | 112          |
| S17    | 14   | 13       | Grt     | 39.17 |       | 20.51 | 23.68 | 9.93 | 1.00  | 5.70  |      |      |       |      |      |    |      |       |     |      |      |      |      | 100   | 116          |
| S17    | 14   | 14       | Chr     |       |       | 8.52  | 19.16 |      | 8.80  |       |      |      |       |      |      |    | 0.34 | 63.17 |     |      |      |      |      | 100   | 113          |
| S17    | 14   | 15       | Spl     |       |       | 30.44 | 16.05 |      | 14.00 |       |      |      |       |      |      |    |      | 39.51 |     |      |      |      |      | 100   | 112          |
| S17    | 14   | 16       | Grt     | 39.49 |       | 21.04 | 30.74 | 1.92 | 3.77  | 3.03  |      |      |       |      |      |    |      |       |     |      |      |      |      | 100   | 112          |
| S17    | 14   | 17       | Grt     | 39.21 |       | 21.03 | 31.43 | 1.56 | 1.50  | 5.27  |      |      |       |      |      |    |      |       |     |      |      |      |      | 100   | 109          |
| S17    | 14   | 18       | TiO2    |       | 99.61 |       | 0.39  |      |       |       |      |      |       |      |      |    |      |       |     |      |      |      |      | 100   | 100          |

Table B9.2: EDS analyses of sample 17.

| Sample | Site | Position | Mineral | SiO2  | TiO2   | Al2O3 | FeO   | MnO  | MgO   | CaO   | Na2O | K2O  | P2O5  | SO3  | F     | Cl | V2O5 | Cr2O3 | NiO  | ZnO | ZrO2  | HfO2 | WO3  | Total | Actual Total |
|--------|------|----------|---------|-------|--------|-------|-------|------|-------|-------|------|------|-------|------|-------|----|------|-------|------|-----|-------|------|------|-------|--------------|
| S17    | 14   | 19       | Qz      | 96.28 |        | 2.09  | 0.83  |      | 0.36  |       |      | 0.44 |       |      |       |    |      |       |      |     |       |      |      | 100   | 112          |
| S17    | 14   | 20       | Ep      | 40.07 |        | 23.08 | 11.35 |      |       | 22.50 |      |      |       |      |       |    |      |       |      |     |       |      |      | 97    | 108          |
| S17    | 14   | 21       | Chr     |       | 0.39   | 25.22 | 23.99 |      | 11.88 |       |      |      |       |      |       |    | 0.42 | 38.11 |      |     |       |      |      | 100   | 108          |
| S17    | 15   | 1        | Chr     |       |        | 11.85 | 24.41 |      | 8.90  |       |      |      |       |      |       |    |      | 54.84 |      |     |       |      |      | 100   | 106          |
| S17    | 15   | 2        | Chr     |       |        | 17.59 | 24.93 |      | 10.14 |       |      |      |       |      |       |    |      | 47.34 |      |     |       |      |      | 100   | 104          |
| S17    | 15   | 3        | Chr     |       |        | 26.38 | 18.03 |      | 14.16 |       |      |      |       |      |       |    |      | 41.43 |      |     |       |      |      | 100   | 107          |
| S17    | 15   | 4        | Spl     |       |        | 29.07 | 18.05 |      | 14.93 |       |      |      |       |      |       |    |      | 37.95 |      |     |       |      |      | 100   | 106          |
| S17    | 15   | 5        | Chr     |       |        | 9.22  | 21.40 |      | 8.76  |       |      |      |       |      |       |    |      | 60.62 |      |     |       |      |      | 100   | 102          |
| S17    | 15   | 6        | Chr     |       | 0.68   | 16.05 | 31.72 |      | 8.64  |       |      |      |       |      |       |    |      | 42.90 |      |     |       |      |      | 100   | 103          |
| S17    | 15   | 7        | Ap      |       |        |       |       |      |       | 50.15 |      |      | 45.16 |      | 4.69  |    |      |       |      |     |       |      |      | 100   | 117          |
| S17    | 15   | 8        | Ep      | 39.05 |        | 20.40 | 14.22 | 4.93 | 0.80  | 17.61 |      |      |       |      |       |    |      |       |      |     |       |      |      | 97    | 113          |
| S17    | 15   | 9        | Spl     |       |        | 37.60 | 17.36 |      | 15.12 |       |      |      |       |      |       |    |      | 29.91 |      |     |       |      |      | 100   | 110          |
| S17    | 15   | 10       | Spl     |       |        | 40.88 | 13.91 |      | 17.47 |       |      |      |       |      |       |    |      | 27.74 |      |     |       |      |      | 100   | 110          |
| S17    | 15   | 11       | Spl     |       |        | 32.88 | 17.11 |      | 14.63 |       |      |      |       |      |       |    |      | 35.38 |      |     |       |      |      | 100   | 110          |
| S17    | 15   | 12       | Spl     |       |        | 46.71 | 14.86 |      | 18.14 |       |      |      |       |      |       |    |      | 19.95 | 0.33 |     |       |      |      | 100   | 114          |
| S17    | 15   | 13       | Mix     | 9.09  |        | 12.24 | 73.61 |      | 0.86  | 0.81  |      |      | 2.75  |      |       |    |      | 0.65  |      |     |       |      |      | 100   | 83           |
| S17    | 15   | 14       | Spl     |       |        | 34.20 | 15.82 |      | 15.57 |       |      |      |       |      |       |    |      | 34.41 |      |     |       |      |      | 100   | 112          |
| S17    | 15   | 15       | Chr     |       |        | 26.38 | 19.59 |      | 11.52 |       |      |      |       |      |       |    | 0.41 | 42.09 |      |     |       |      |      | 100   | 111          |
| S17    | 15   | 16       | Ep      | 39.38 |        | 19.88 | 14.44 | 2.36 |       | 20.94 |      |      |       |      |       |    |      |       |      |     |       |      |      | 97    | 115          |
| S17    | 16   | 1        | Zrn     | 31.09 |        |       |       |      |       |       |      |      |       |      |       |    |      |       |      |     | 68.91 |      |      | 100   | 119          |
| S17    | 16   | 2        | Zrn     | 31.18 |        |       |       |      |       |       |      |      |       |      |       |    |      |       |      |     | 67.47 | 1.35 |      | 100   | 118          |
| S17    | 16   | 3        | Grt     | 39.59 |        | 21.06 | 33.39 | 0.34 | 4.49  | 1.13  |      |      |       |      |       |    |      |       |      |     |       |      |      | 100   | 109          |
| S17    | 16   | 4        | Spl     |       |        | 44.09 | 15.23 |      | 17.13 |       |      |      |       |      |       |    |      | 23.55 |      |     |       |      |      | 100   | 105          |
| S17    | 16   | 5        | Chr     |       |        | 24.57 | 15.04 |      | 14.13 |       |      |      |       |      |       |    |      | 46.26 |      |     |       |      |      | 100   | 106          |
| S17    | 16   | 6        | Chr +   | 18.30 | 1.35   | 7.96  | 13.82 |      | 4.09  | 1.25  | 1.39 | 0.26 |       | 0.95 | 17.94 |    |      | 32.68 |      |     |       |      |      | 100   | 76           |
| S17    | 16   | 7        | Chr     |       |        | 8.98  | 30.60 |      | 6.83  |       |      |      |       |      |       |    | 0.41 | 53.18 |      |     |       |      |      | 100   | 105          |
| S17    | 16   | 8        | Chr     |       |        | 13.87 | 24.53 |      | 9.37  |       |      |      |       |      |       |    |      | 52.24 |      |     |       |      |      | 100   | 105          |
| S17    | 16   | 9        | Grt     | 40.20 |        | 21.28 | 29.27 | 0.59 | 5.49  | 3.17  |      |      |       |      |       |    |      |       |      |     |       |      |      | 100   | 112          |
| S17    | 16   | 10       | Chr     |       |        | 10.71 | 21.71 |      | 8.49  |       |      |      |       |      |       |    |      | 59.09 |      |     |       |      |      | 100   | 106          |
| S17    | 16   | 11       | Grt     | 42.59 |        | 23.87 | 7.19  |      | 3.39  | 22.97 |      |      |       |      |       |    |      |       |      |     |       |      |      | 100   | 101          |
| S17    | 16   | 12       | Spl     |       |        | 45.39 | 13.84 |      | 18.29 |       |      |      |       |      |       |    |      | 22.48 |      |     |       |      |      | 100   | 110          |
| S17    | 16   | 13       | Chr     |       | 1.41   | 19.88 | 31.84 |      | 8.35  |       |      |      |       |      |       |    | 0.59 | 37.94 |      |     |       |      |      | 100   | 105          |
| S17    | 16   | 14       | Ap +    | 1.79  |        | 0.69  |       |      |       | 44.30 | 0.79 |      | 37.27 | 0.97 | 9.99  |    |      |       |      |     |       |      | 4.20 | 100   | 108          |
| S17    | 16   | 15       | TiO2    |       | 100.00 |       |       |      |       |       |      |      |       |      |       |    |      |       |      |     |       |      |      | 100   | 102          |
| S17    | 16   | 16       | Cpx     | 53.52 | 0.56   | 2.30  | 7.57  | 0.33 | 17.33 | 18.07 | 0.31 |      |       |      |       |    |      |       |      |     |       |      |      | 100   | 112          |
| S17    | 16   | 17       | Grt     | 39.99 |        | 21.45 | 30.67 | 0.96 | 6.07  | 0.86  |      |      |       |      |       |    |      |       |      |     |       |      |      | 100   | 107          |

Table B9.2: EDS analyses of sample 17.

| Sample | Site | Position | Mineral | SiO2   | TiO2  | Al2O3 | FeO   | MnO  | MgO   | CaO   | Na2O | K2O  | P2O5  | SO3  | F    | Cl   | V2O5 | Cr2O3 | NiO  | ZnO | ZrO2  | HfO2 | WO3  | Total | Actual<br>Total |     |
|--------|------|----------|---------|--------|-------|-------|-------|------|-------|-------|------|------|-------|------|------|------|------|-------|------|-----|-------|------|------|-------|-----------------|-----|
| S17    | 16   | 18       | Spl     |        |       | 42.02 | 14.19 |      | 17.48 |       |      |      |       |      |      |      |      | 26.31 |      |     |       |      |      | 100   | 111             |     |
| S17    | 16   | 19       | Chr     |        |       | 26.61 | 14.11 |      | 15.35 |       |      |      |       |      |      |      |      | 43.93 |      |     |       |      |      | 100   | 112             |     |
| S17    | 16   | 20       | Ep      | 40.26  |       | 26.39 | 7.49  |      |       | 22.85 |      |      |       |      |      |      |      |       |      |     |       |      |      | 97    | 105             |     |
| S17    | 16   | 21       | Grt     | 39.55  |       | 20.82 | 30.51 | 4.26 | 3.16  | 1.70  |      |      |       |      |      |      |      |       |      |     |       |      |      | 100   | 109             |     |
| S17    | 16   | 22       | Qz      | 100.00 |       |       |       |      |       |       |      |      |       |      |      |      |      |       |      |     |       |      |      | 100   | 116             |     |
| S17    | 17   | 1        | Ap      |        |       |       |       |      |       | 48.73 |      |      | 44.78 |      | 6.49 |      |      |       |      |     |       |      |      |       | 100             | 118 |
| S17    | 17   | 2        | Chr     |        |       | 17.02 | 20.09 |      | 11.06 |       |      |      |       |      |      |      | 0.39 | 51.44 |      |     |       |      |      |       | 100             | 106 |
| S17    | 17   | 3        | Chl +   | 29.27  | 0.47  | 17.36 | 27.25 | 0.28 | 6.00  | 0.71  | 0.61 | 3.06 |       |      |      |      |      |       |      |     |       |      |      | 85    | 97              |     |
| S17    | 17   | 4        | Chr     |        |       | 13.40 | 21.27 |      | 9.46  |       |      |      |       |      |      |      | 0.37 | 55.51 |      |     |       |      |      |       | 100             | 105 |
| S17    | 17   | 5        | Spl     |        | 1.14  | 28.47 | 28.11 |      | 11.16 |       |      |      |       |      |      |      | 0.40 | 30.72 |      |     |       |      |      |       | 100             | 108 |
| S17    | 17   | 6        | Chr     | 1.09   |       | 9.11  | 26.30 |      | 8.93  | 0.32  |      |      |       |      |      |      |      | 54.24 |      |     |       |      |      |       | 100             | 108 |
| S17    | 17   | 7        | Chr     |        |       | 9.37  | 25.40 |      | 7.91  |       |      |      |       |      |      |      |      | 57.32 |      |     |       |      |      |       | 100             | 105 |
| S17    | 17   | 8        | "Ilm" + |        | 30.13 | 0.62  | 67.76 |      | 1.50  |       |      |      |       |      |      |      |      |       |      |     |       |      |      |       | 100             | 98  |
| S17    | 17   | 9        | Ap      |        |       |       | 0.56  |      |       | 49.08 |      |      | 44.91 |      | 5.45 |      |      |       |      |     |       |      |      |       | 100             | 117 |
| S17    | 17   | 10       | Grt     | 41.36  |       | 21.85 | 2.22  | 0.28 |       | 34.28 |      |      |       |      |      |      |      |       |      |     |       |      |      |       | 100             | 110 |
| S17    | 17   | 11       | Chr     |        |       | 12.24 | 19.09 |      | 11.15 |       |      |      |       |      |      |      | 0.46 | 57.06 |      |     |       |      |      |       | 100             | 104 |
| S17    | 17   | 12       | Grt     | 40.44  |       | 21.45 | 27.57 | 1.03 | 8.35  | 1.16  |      |      |       |      |      |      |      |       |      |     |       |      |      |       | 100             | 112 |
| S17    | 17   | 13       | Grt     | 39.83  |       | 20.88 | 30.55 | 1.66 | 4.62  | 2.45  |      |      |       |      |      |      |      |       |      |     |       |      |      |       | 100             | 113 |
| S17    | 17   | 14       | Chr     |        |       | 21.56 | 18.05 |      | 11.25 |       |      |      |       |      |      |      |      | 49.14 |      |     |       |      |      |       | 100             | 108 |
| S17    | 17   | 15       | Chr     |        |       | 22.07 | 19.56 |      | 12.10 |       |      |      |       |      |      |      |      | 46.27 |      |     |       |      |      |       | 100             | 110 |
| S17    | 17   | 16       | Chr     |        | 0.74  | 23.92 | 25.98 |      | 10.80 |       |      |      |       |      |      |      |      | 38.55 |      |     |       |      |      |       | 100             | 108 |
| S17    | 17   | 17       | Zrn     | 31.26  |       |       |       |      |       |       |      |      |       |      |      |      |      |       |      |     | 68.74 |      |      |       | 100             | 122 |
| S17    | 17   | 18       | Spl     |        |       | 37.02 | 14.20 |      | 16.81 |       |      |      |       |      |      |      |      | 31.97 |      |     |       |      |      |       | 100             | 114 |
| S17    | 17   | 19       | Chr     |        | 0.34  | 26.71 | 25.10 |      | 10.68 |       |      |      |       |      |      |      |      | 37.18 |      |     |       |      |      |       | 100             | 113 |
| S17    | 17   | 20       | Zrn     | 30.99  |       |       |       |      |       |       |      |      |       |      |      |      |      |       |      |     | 69.01 |      |      |       | 100             | 124 |
| S17    | 17   | 21       | Grt     | 38.60  | 3.30  | 21.06 | 23.58 | 2.70 | 3.20  | 7.57  |      |      |       |      |      |      |      |       |      |     |       |      |      |       | 100             | 115 |
| S17    | 17   | 22       | Chr     |        | 0.61  | 27.10 | 23.86 |      | 12.53 |       |      |      |       |      |      |      |      | 35.89 |      |     |       |      |      |       | 100             | 109 |
| S17    | 18   | 1        | Ep      | 40.84  |       | 26.59 | 7.02  | 0.33 |       | 22.22 |      |      |       |      |      |      |      |       |      |     |       |      |      |       | 97              | 101 |
| S17    | 18   | 2        | Grt     | 39.61  |       | 21.25 | 28.73 | 1.84 | 3.81  | 4.76  |      |      |       |      |      |      |      |       |      |     |       |      |      |       | 100             | 107 |
| S17    | 18   | 3        | Spl     |        |       | 31.53 | 13.90 |      | 16.29 |       |      |      |       |      |      |      |      | 38.28 |      |     |       |      |      |       | 100             | 103 |
| S17    | 18   | 4        | "Ilm"   |        | 64.03 |       | 35.97 |      |       |       |      |      |       |      |      |      |      |       |      |     |       |      |      |       | 100             | 97  |
| S17    | 18   | 5        | Ap      |        |       |       |       |      |       | 48.23 | 0.95 |      | 43.01 | 0.91 | 6.91 |      |      |       |      |     |       |      |      |       | 100             | 115 |
| S17    | 18   | 6        | Ap      |        |       |       | 0.26  |      | 0.39  | 49.06 |      |      | 45.27 |      | 2.13 | 1.31 |      |       |      |     |       |      | 1.58 |       | 100             | 117 |
| S17    | 18   | 7        | "Ilm"   |        | 58.60 | 0.89  | 38.50 | 0.68 | 1.33  |       |      |      |       |      |      |      |      |       |      |     |       |      |      |       | 100             | 74  |
| S17    | 18   | 8        | Bt      | 38.60  | 1.75  | 18.14 | 17.06 |      | 10.44 |       | 0.46 | 7.74 |       | 1.42 |      |      |      |       | 0.39 |     |       |      |      |       | 96              | 96  |
| S17    | 18   | 9        | Grt     | 40.03  |       | 21.41 | 30.59 | 0.79 | 5.04  | 2.14  |      |      |       |      |      |      |      |       |      |     |       |      |      |       | 100             | 110 |

Table B9.2: EDS analyses of sample 17.

| Sample | Site                                          | Position | Mineral | SiO2  | TiO2   | Al2O3 | FeO   | MnO   | MgO   | CaO   | Na2O | K2O | P2O5 | SO3 | F    | Cl   | V2O5 | Cr2O3 | NiO | ZnO | ZrO2 | HfO2 | WO3 | Total | Actual Total |
|--------|-----------------------------------------------|----------|---------|-------|--------|-------|-------|-------|-------|-------|------|-----|------|-----|------|------|------|-------|-----|-----|------|------|-----|-------|--------------|
| S17    | 18                                            | 10       | Chr     |       | 0.85   | 23.61 | 23.80 |       | 11.12 |       |      |     |      |     |      |      | 0.38 | 40.23 |     |     |      |      |     | 100   | 103          |
| S17    | 18                                            | 11       | Chr     |       |        | 13.72 | 23.14 |       | 8.36  |       |      |     |      |     |      |      |      | 54.79 |     |     |      |      |     | 100   | 109          |
| S17    | 18                                            | 12       | Feohy + | 8.42  |        | 9.37  | 77.43 |       | 0.81  | 0.96  |      |     | 2.72 |     |      | 0.29 |      |       |     |     |      |      |     | 100   | 80           |
| S17    | 18                                            | 13       | Ep      | 40.63 |        | 27.53 | 0.37  | 0.57  | 3.59  | 22.24 | 0.28 |     |      |     | 1.78 |      |      |       |     |     |      |      |     | 97    | 107          |
| S17    | 18                                            | 14       | Chr     |       |        | 12.71 | 21.61 |       | 10.58 |       |      |     |      |     |      |      |      | 55.10 |     |     |      |      |     | 100   | 106          |
| S17    | 18                                            | 15       | Chr     |       |        | 9.52  | 15.72 |       | 13.15 |       |      |     |      |     |      |      |      | 61.61 |     |     |      |      |     | 100   | 102          |
| S17    | 18                                            | 16       | Spl     |       |        | 50.83 | 12.27 |       | 19.55 |       |      |     |      |     |      |      |      | 17.35 |     |     |      |      |     | 100   | 114          |
| S17    | 18                                            | 17       | Grt     | 41.06 |        | 21.45 | 25.56 | 0.31  | 8.66  | 2.96  |      |     |      |     |      |      |      |       |     |     |      |      |     | 100   | 110          |
| S17    | 18                                            | 18       | Chr     |       | 0.41   | 21.29 | 22.14 |       | 12.23 |       |      |     |      |     |      |      |      | 43.93 |     |     |      |      |     | 100   | 104          |
| S17    | 18                                            | 19       | Chr     |       |        | 12.16 | 21.55 |       | 10.32 |       |      |     |      |     |      |      |      | 55.97 |     |     |      |      |     | 100   | 103          |
| S17    | 19                                            | 1        | Grt     | 39.98 |        | 21.35 | 27.97 | 0.67  | 3.59  | 6.44  |      |     |      |     |      |      |      |       |     |     |      |      |     | 100   | 107          |
| S17    | 19                                            | 2        | Chr     |       |        | 23.55 | 18.28 |       | 12.05 |       |      |     |      |     |      |      |      | 46.12 |     |     |      |      |     | 100   | 103          |
| S17    | 19                                            | 3        | Spl     |       | 0.36   | 33.87 | 22.16 |       | 14.72 |       |      |     |      |     |      |      |      | 28.89 |     |     |      |      |     | 100   | 105          |
| S17    | 19                                            | 4        | TiO2    |       | 100.00 |       |       |       |       |       |      |     |      |     |      |      |      |       |     |     |      |      |     | 100   | 106          |
| S17    | 19                                            | 5        | Chr     |       |        | 14.62 | 19.92 |       | 10.11 |       |      |     |      |     |      |      |      | 55.35 |     |     |      |      |     | 100   | 105          |
| S17    | 19                                            | 6        | Chr     |       |        | 9.01  | 25.94 |       | 7.77  |       |      |     |      |     |      |      |      | 57.28 |     |     |      |      |     | 100   | 103          |
| S17    | 19                                            | 7        | Spl     |       |        | 30.49 | 22.20 |       | 12.47 |       |      |     |      |     |      |      | 0.37 | 34.47 |     |     |      |      |     | 100   | 111          |
| S17    | 19                                            | 8        | Chr     |       |        | 11.81 | 19.72 |       | 9.56  |       |      |     |      |     |      |      |      | 58.92 |     |     |      |      |     | 100   | 108          |
| S17    | 19                                            | 9        | Chr     |       |        | 16.90 | 20.24 |       | 10.04 |       |      |     |      |     |      |      |      | 52.81 |     |     |      |      |     | 100   | 108          |
| S17    | 19                                            | 10       | Grt     | 39.91 |        | 21.01 | 28.61 | 0.36  | 1.26  | 8.85  |      |     |      |     |      |      |      |       |     |     |      |      |     | 100   | 114          |
| S17    | 19                                            | 11       | Grt     | 39.30 |        | 20.60 | 27.73 | 5.52  | 0.90  | 5.95  |      |     |      |     |      |      |      |       |     |     |      |      |     | 100   | 107          |
| S17    | 19                                            | 12       | Chr     |       |        | 11.65 | 25.45 |       | 8.33  |       |      |     |      |     |      |      |      | 54.58 |     |     |      |      |     | 100   | 110          |
| S17    | 19                                            | 13       | Chr     |       | 1.13   | 15.97 | 44.75 | 0.66  | 4.14  |       |      |     |      |     |      |      | 0.40 | 32.96 |     |     |      |      |     | 100   | 108          |
| S17    | 19                                            | 14       | Amph    | 53.24 | 0.29   | 5.45  | 7.52  |       | 17.63 | 11.27 | 1.09 |     |      |     |      |      |      | 0.50  |     |     |      |      |     | 97    | 111          |
| S17    | 19                                            | 15       | Chr     |       | 0.65   | 23.24 | 25.23 |       | 11.18 |       |      |     |      |     |      |      | 0.38 | 39.32 |     |     |      |      |     | 100   | 108          |
| S17    | 19                                            | 16       | Grt     | 41.76 |        | 21.71 | 1.91  |       |       | 34.62 |      |     |      |     |      |      |      |       |     |     |      |      |     | 100   | 112          |
| S17    | 19                                            | 17       | Grt     | 41.42 |        | 23.93 | 11.57 |       |       | 23.07 |      |     |      |     |      |      |      |       |     |     |      |      |     | 100   | 103          |
| S17    | 19                                            | 18       | Grt     | 39.32 |        | 20.57 | 21.00 | 11.56 | 0.39  | 7.16  |      |     |      |     |      |      |      |       |     |     |      |      |     | 100   | 104          |
|        |                                               |          |         |       |        |       |       |       |       |       |      |     |      |     |      |      |      |       |     |     |      |      |     |       |              |
|        |                                               |          |         |       |        |       |       |       |       |       |      |     |      |     |      |      |      |       |     |     |      |      |     |       |              |
|        | Notes                                         |          |         |       |        |       |       |       |       |       |      |     |      |     |      |      |      |       |     |     |      |      |     |       |              |
|        | " " = indicates mineral is altered            |          |         |       |        |       |       |       |       |       |      |     |      |     |      |      |      |       |     |     |      |      |     |       |              |
|        | + = indicates that other minerals are present |          |         |       |        |       |       |       |       |       |      |     |      |     |      |      |      |       |     |     |      |      |     |       |              |
|        |                                               |          |         |       |        |       |       |       |       |       |      |     |      |     |      |      |      |       |     |     |      |      |     |       |              |

B10: SEM-BSE images and EDS mineral analyses for sample S18.



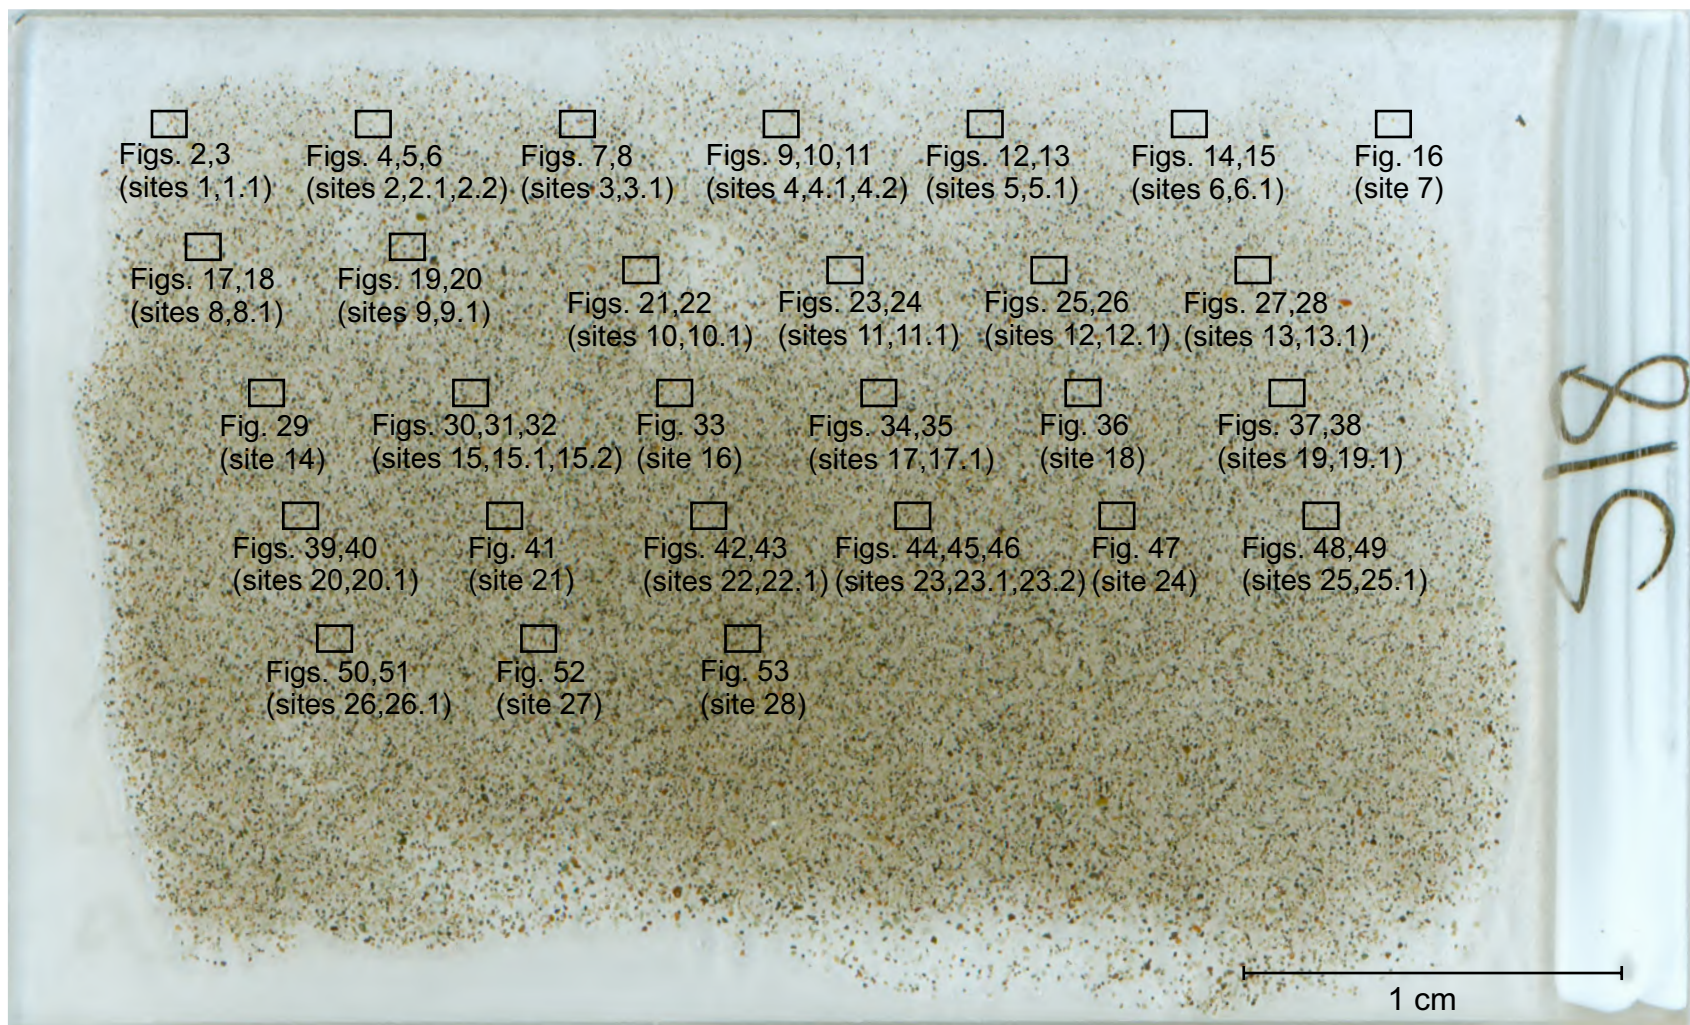

Figure B10.1: Scanned thin section of sample S18 showing the location of analysed sites.

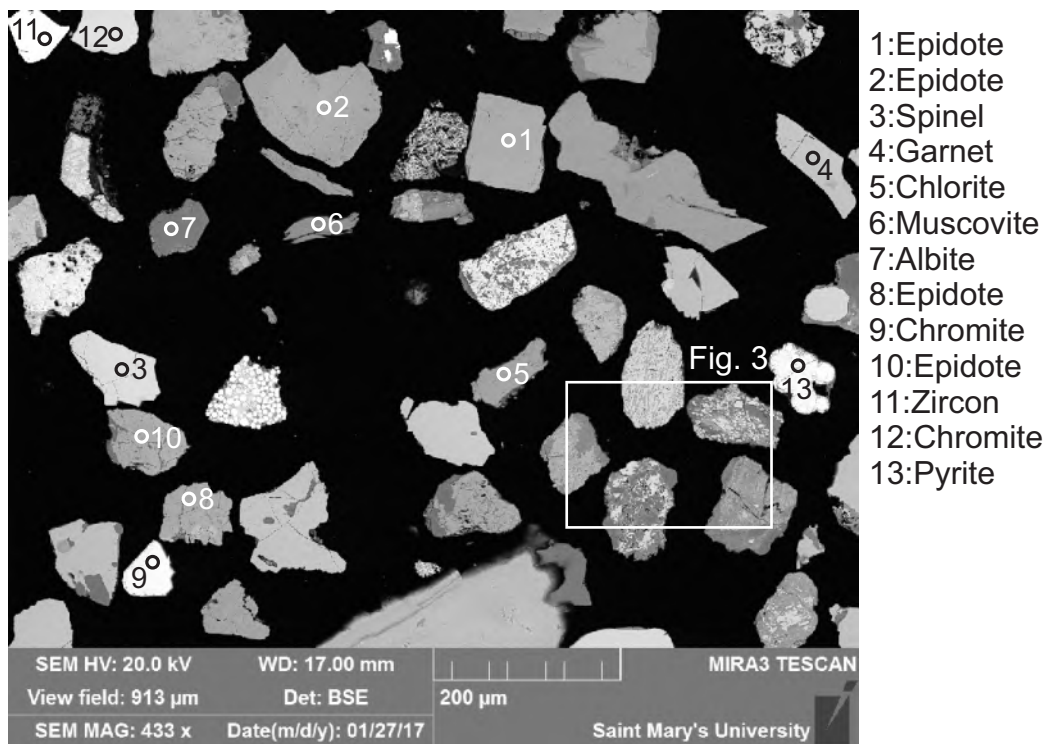

Figure B10.2: Sample S18 site 1 (SEM).

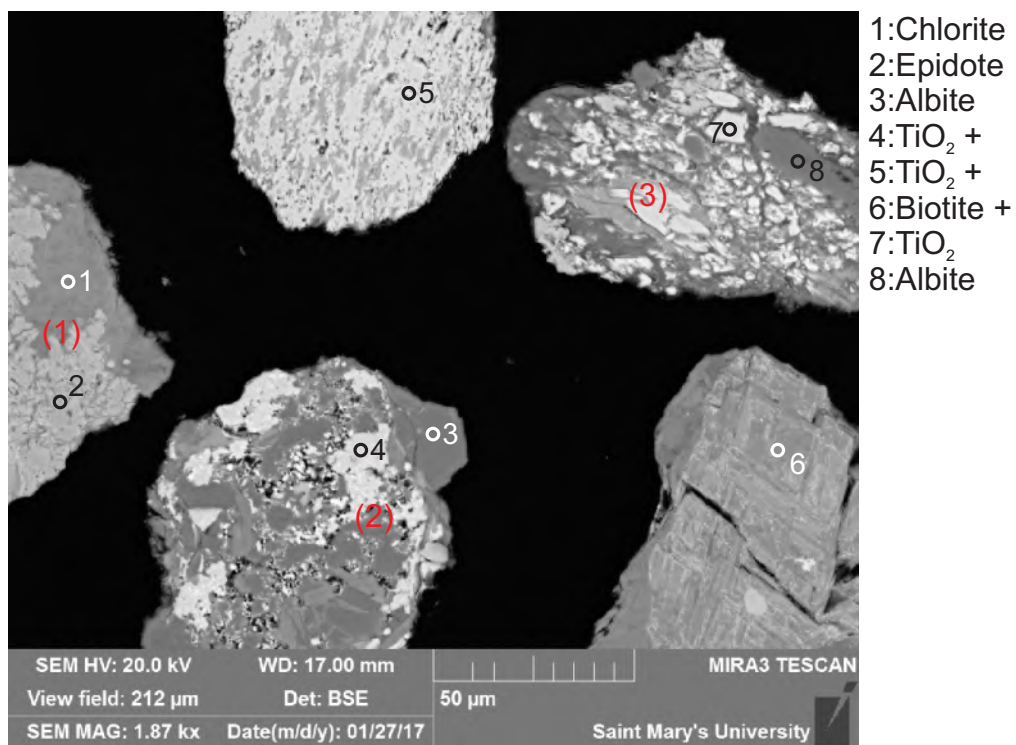

Figure B10.3: Sample S18 site 1.1 (SEM). 1: Lithic clast (chlorite + epidote, hydrothermal). 2: Lithic clast (albite + titania, metamorphic). 3: Lithic clast (albite + titania, metamorphic). Also altered biotite grain and altered ilmenite grain.



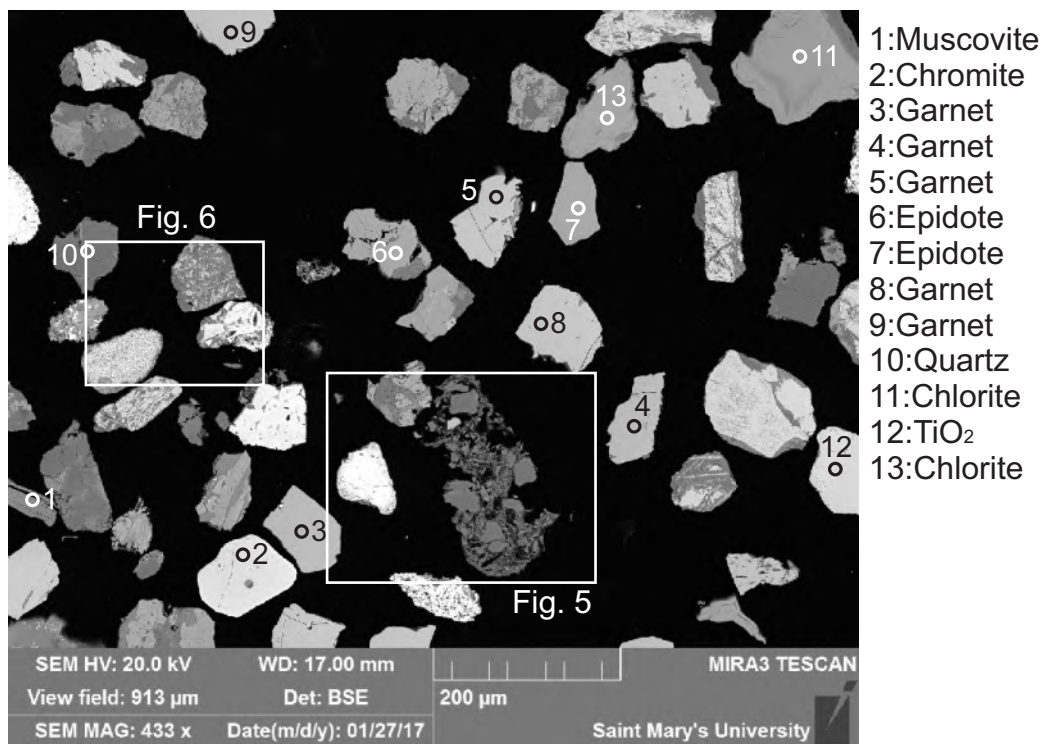

Figure B10.4: Sample S18 site 2 (SEM).

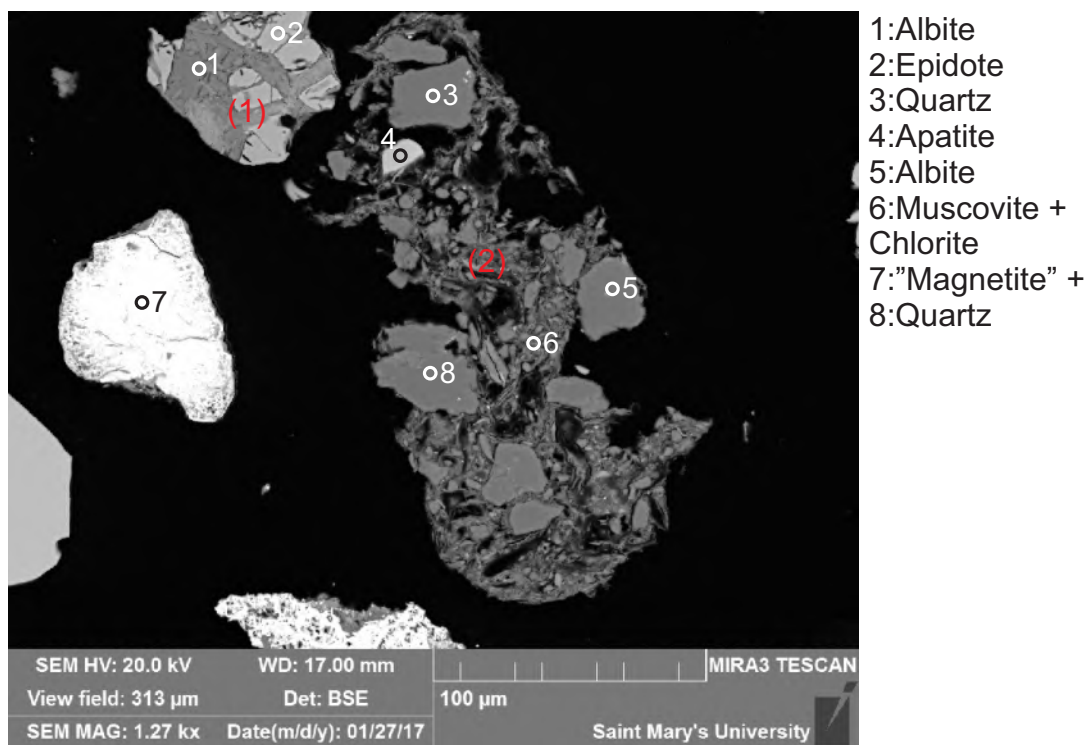

Figure B10.5: Sample S18 site 2.1 (SEM). Lithic clast (albite + epidote, hydrothermal). 2: Lithic clast of quartz + apatite + albite cemented by muscovite + chlorite. Sedimentary. Also altered magnetite grain.

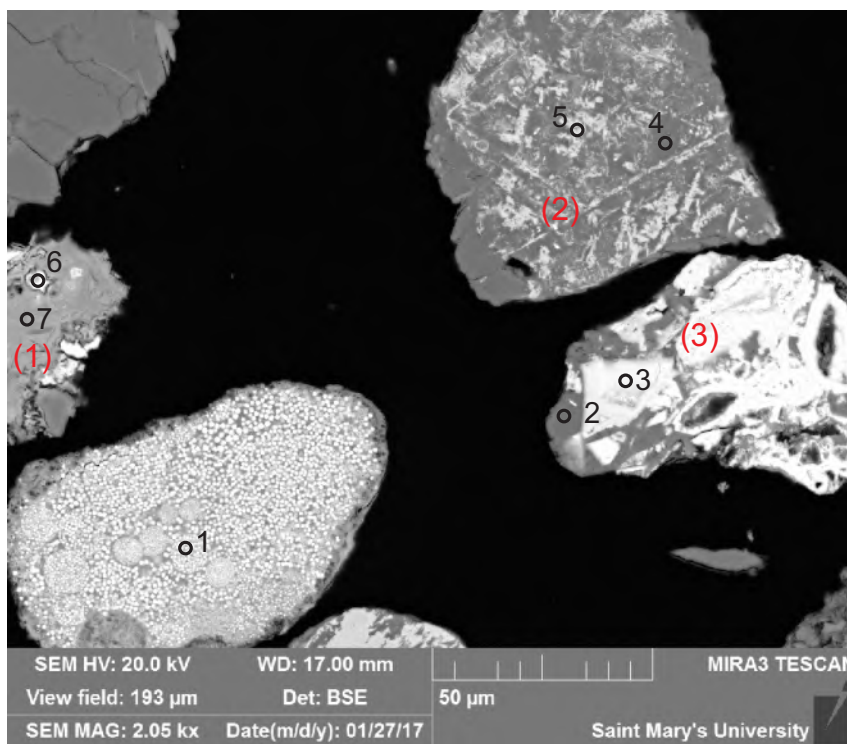

- 1:Pyrite +
- 2:Quartz
- 3:Fe-oxide/hydroxide +
- 4:Quartz
- 5:TiO<sub>2</sub> +
- 6:Pyrite +
- 7:Chlorite +

Figure B10.6: Sample S18 site 2.2 (SEM). 1: Lithic clast (chlorite + pyrite, pyrite nodule in mudstone). 2: Lithic clast (quartz + titania, ?volcanic). 3: Lithic clast (quartz + Fe-oxide/hydroxide, hydrothermal).

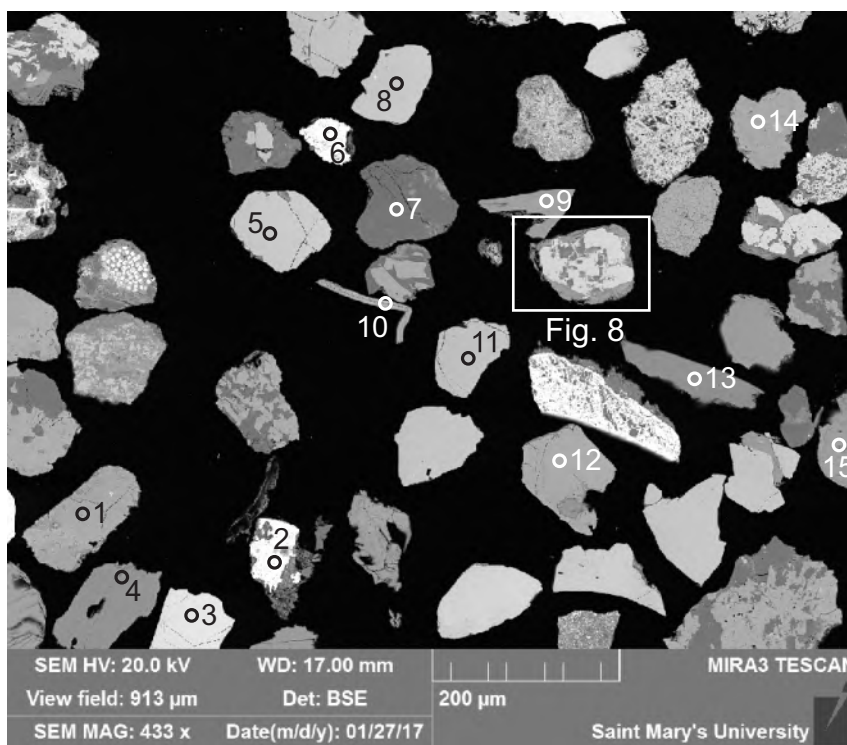

- 1:Epidote
- 2:Fe-oxide/hydroxide
- 3:Chromite
- 4:Epidote
- 5:Garnet
- 6:Fe-oxide/hydroxide +
- 7:Quartz
- 8:Garnet
- 9:Clinopyroxene
- 10:Biotite
- 11:Apatite
- 12:Spinel
- 13:Muscovite
- 14:Epidote
- 15:Chlorite +

Figure B10.7: Sample S18 site 3 (SEM).

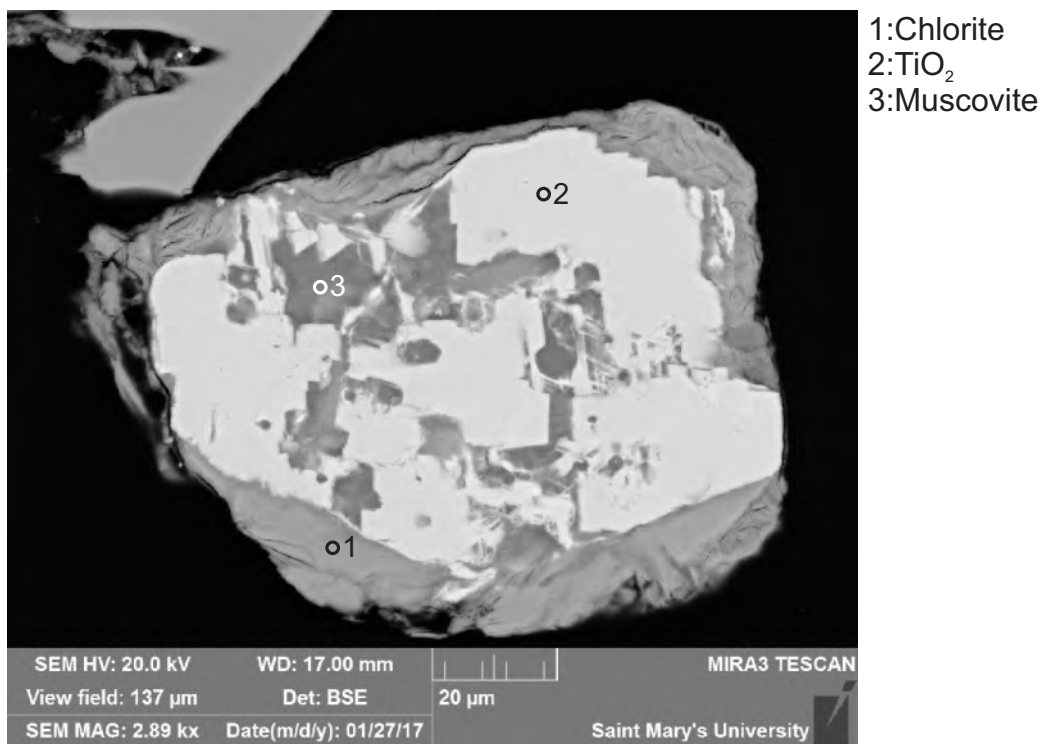

Figure B10.8: Sample S18 site 3.1 (SEM). Lithic clast consists of chlorite + muscovite + titania. Metamorphic.

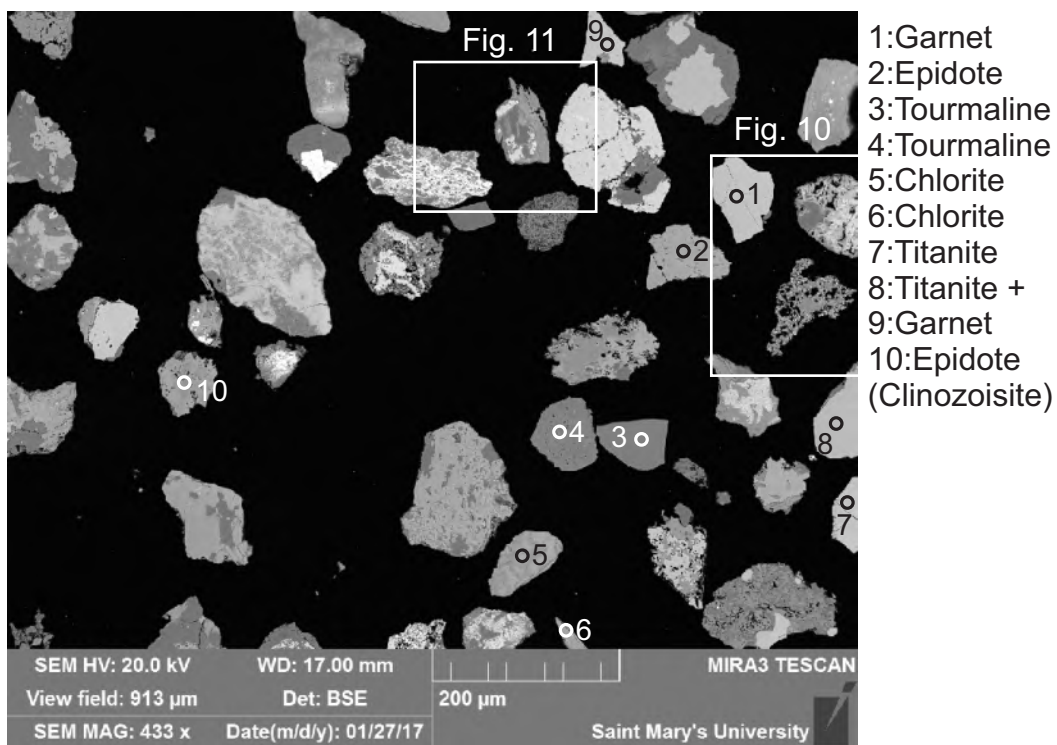

Figure B10.9: Sample S18 site 4 (SEM).



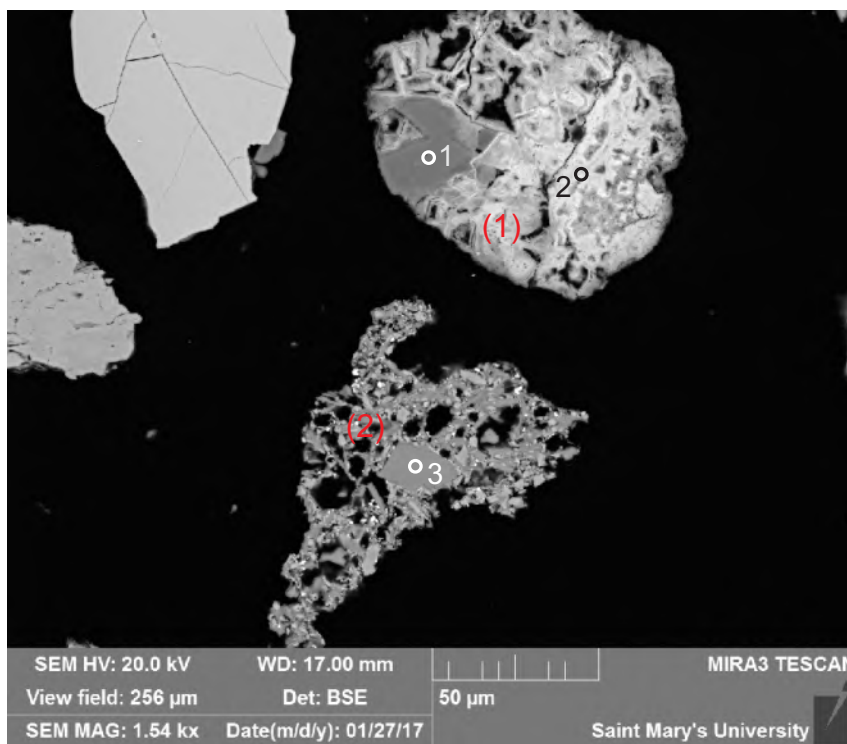

1:Quartz  
2:Fe-  
oxide/hydroxide +  
3:?Plagioclase

Figure B10.10: Sample S18 site 4.1 (SEM). 1: Pedogenic aggregate. 2: Dissolved grain.

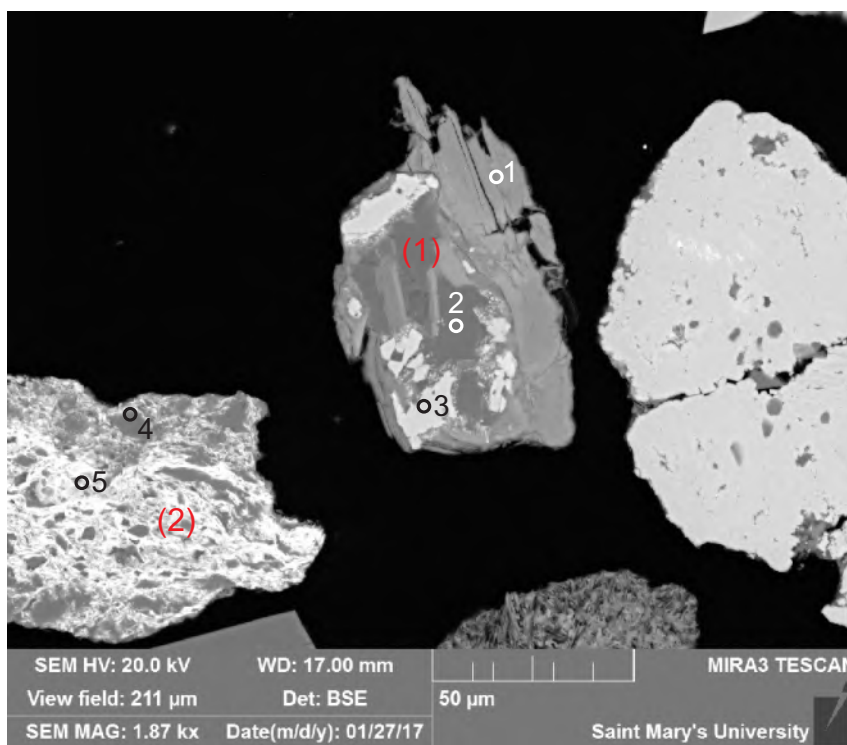

1:Chlorite  
2:Quartz  
3:TiO<sub>2</sub>  
4:Quartz +  
5:Mix

Figure B10.11: Sample S18 site 4.2 (SEM). 1: Lithic clast (chlorite + quartz + titania, metamorphic). 2: Lithic clast (quartz + ?Fe-chlorite, probably silty mudstone).

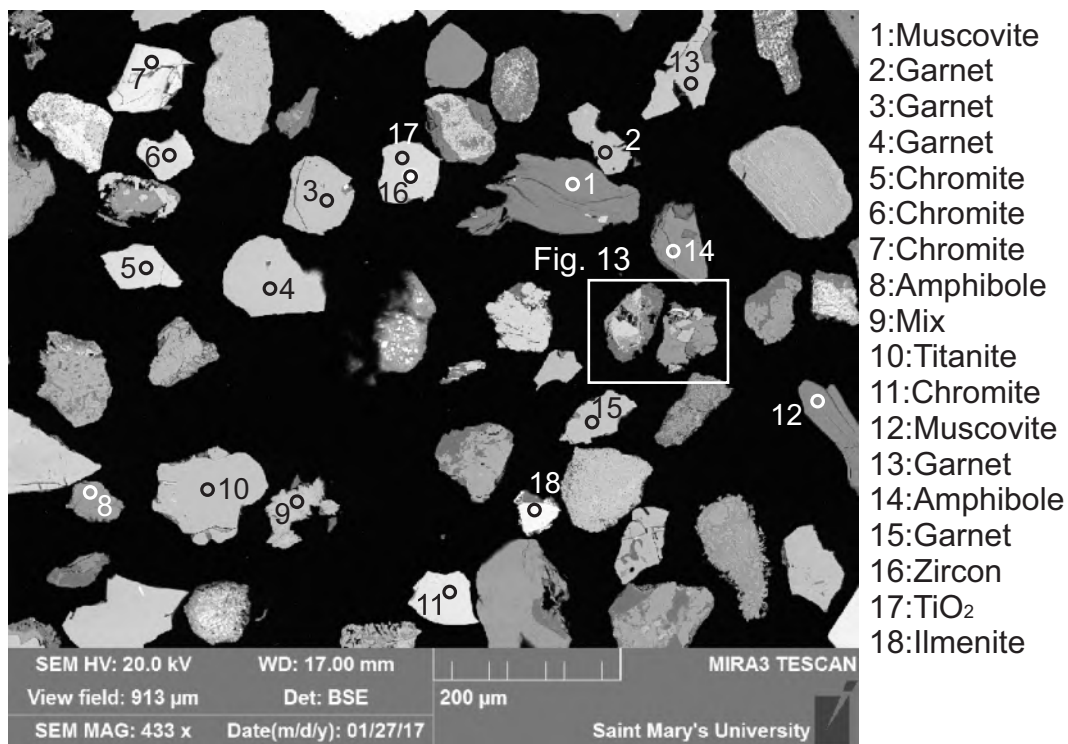

Figure B10.12: Sample S18 site 5 (SEM). This site contains a titania (17) grain with a zircon (16) inclusion.

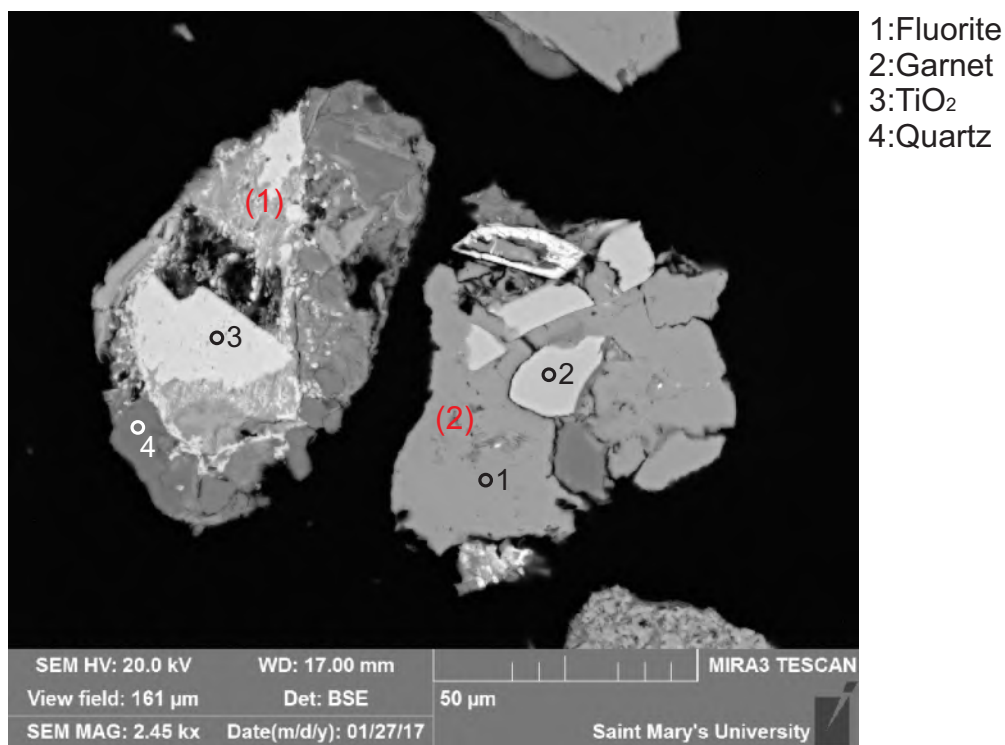

Figure B10.13: Sample S18 site 5.1 (SEM). 1: Altered lithic clast (titania + quartz, metamorphic). 2: Lithic clast (garnet + fluorite, metamorphic).

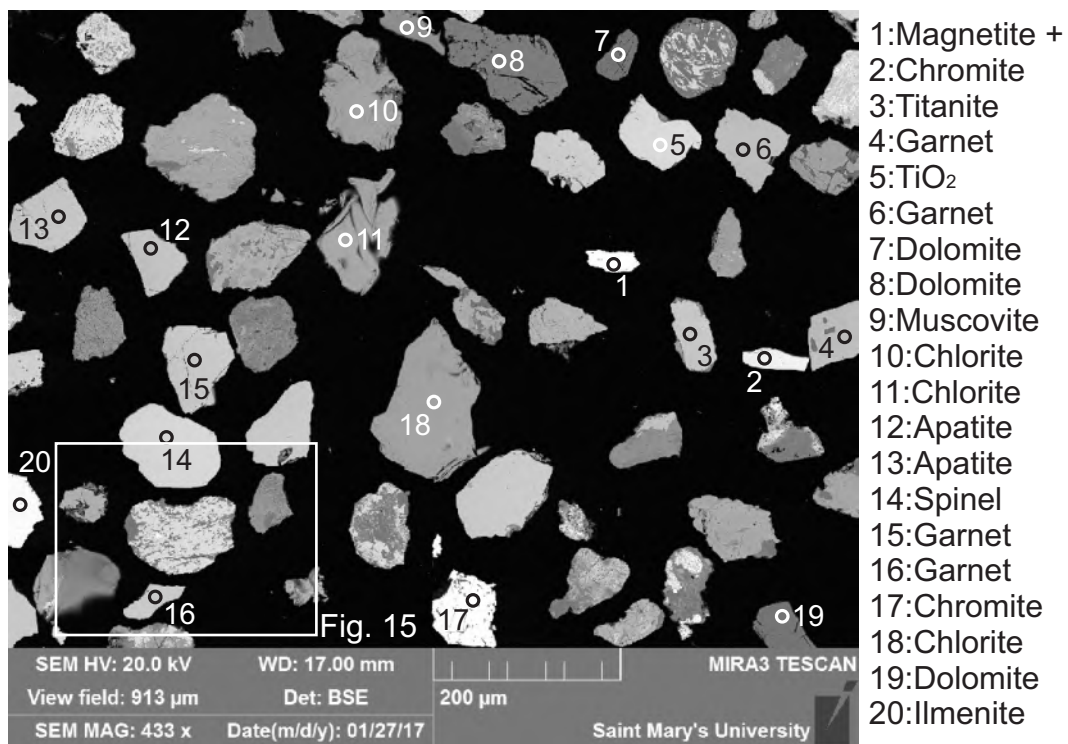

Figure B10.14: Sample S18 site 6 (SEM).

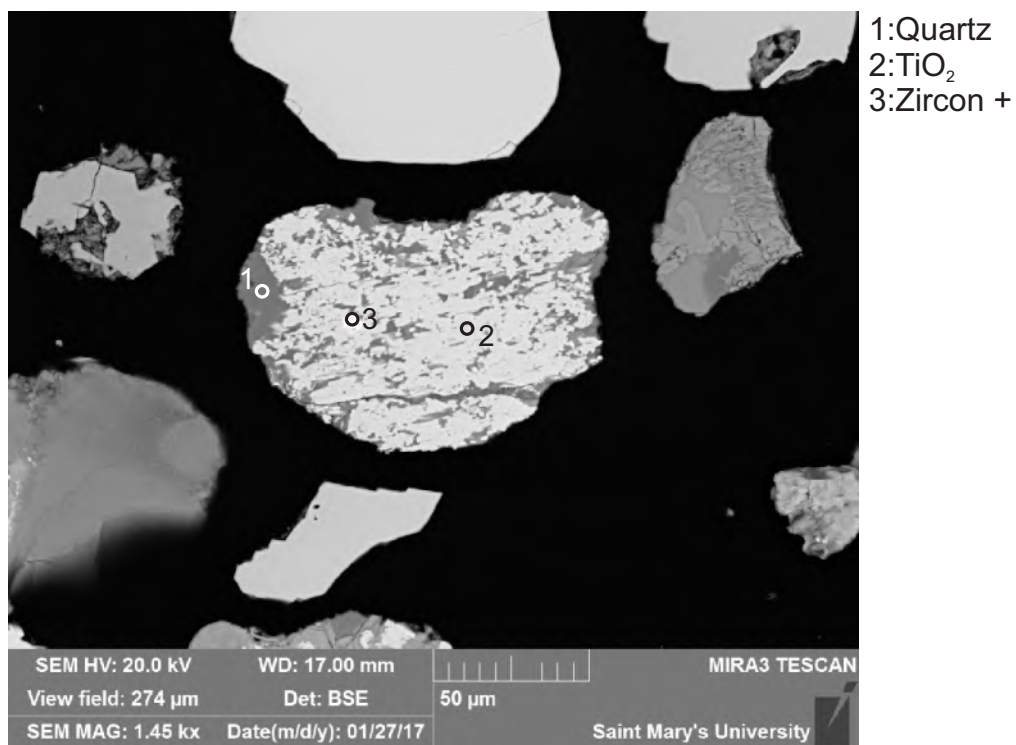

Figure B10.15: Sample S18 site 6.1 This lithic clast consists of quartz + titania, with zircon inclusion. Metamorphic.

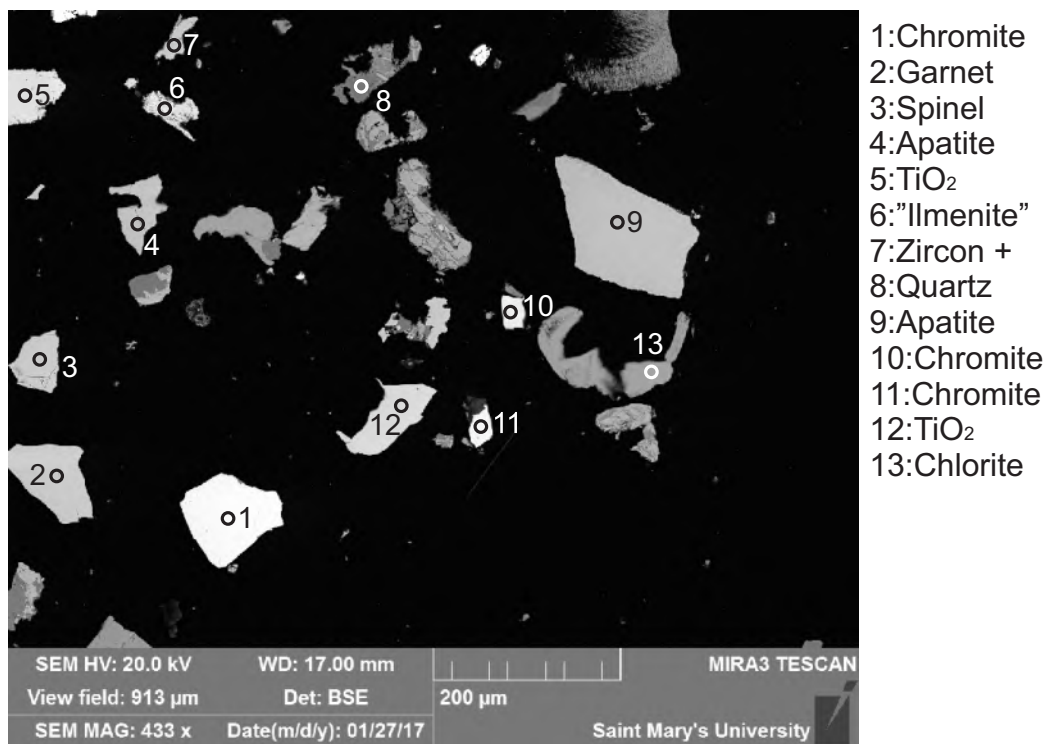

Figure B10.16: Sample S18 site 7 (SEM).

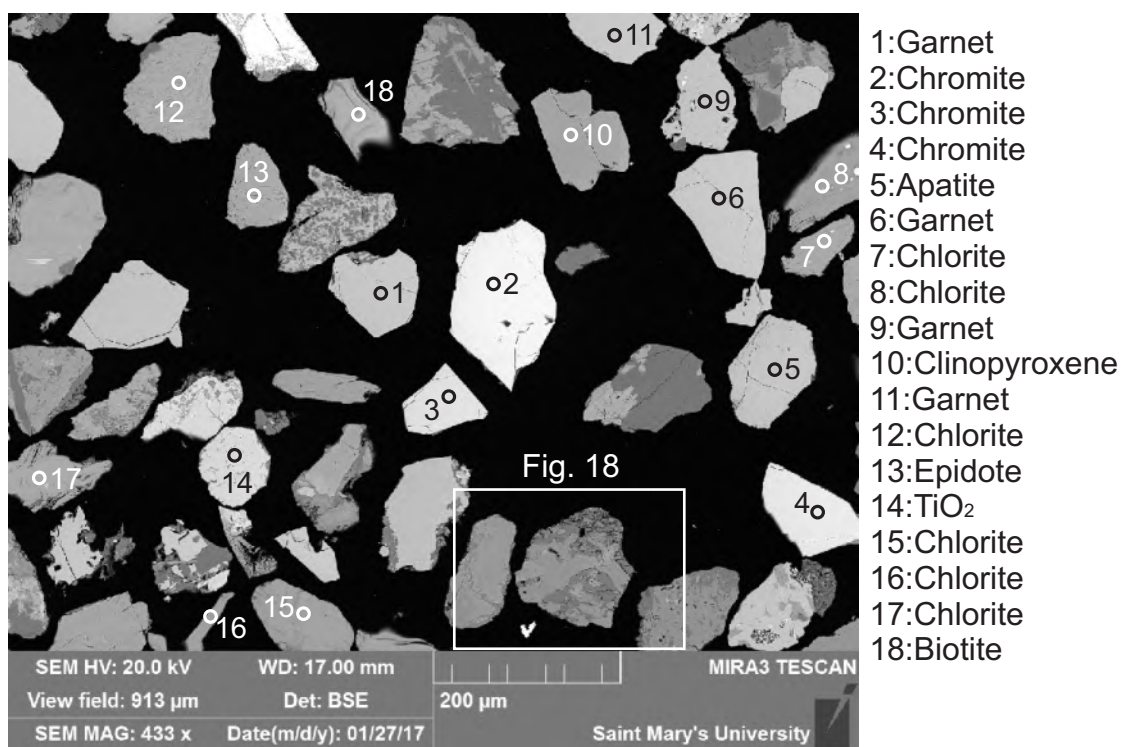

Figure B10.17: Sample S18 site 8 (SEM).



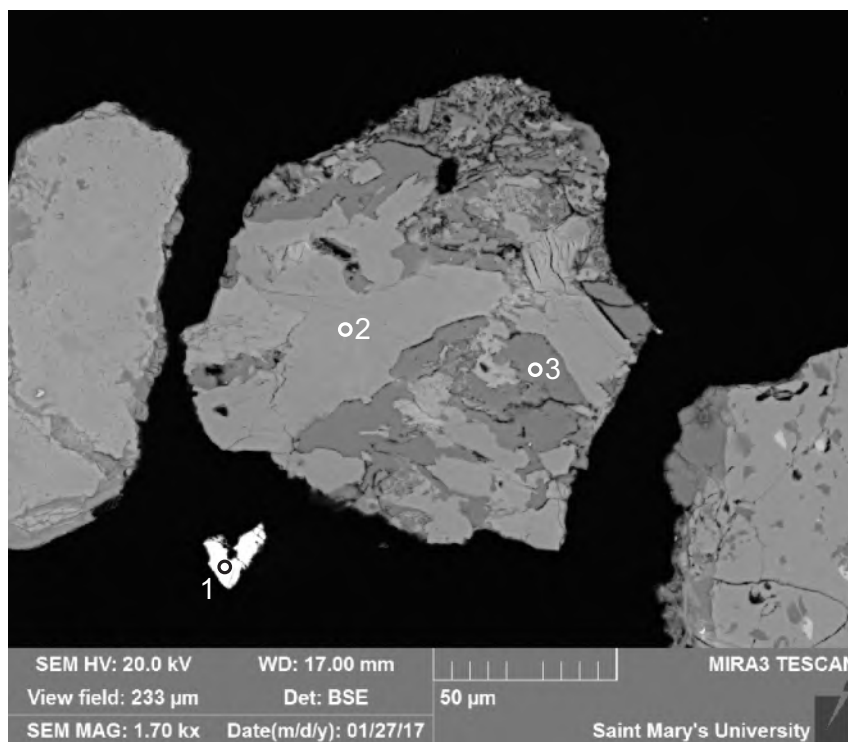

- 1:Sphalerite
- 2:Epidote
- 3:Albite

Figure B10.18: Sample S18 site 8.1 (SEM). This lithic clast consists of epidote + albite, hydrothermal.

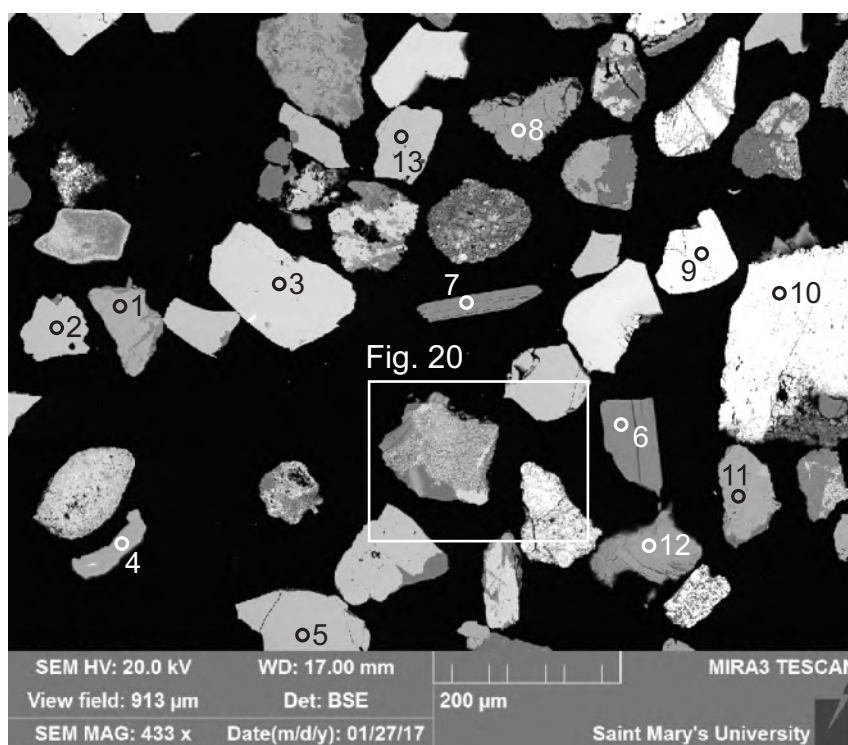

- 1:Chlorite
- 2:?
- 3:TiO<sub>2</sub>
- 4:Chlorite
- 5:Garnet
- 6:Muscovite
- 7:Muscovite
- 8:Fluorite
- 9:Zircon
- 10:Magnetite
- 11:Epidote
- 12:Chlorite
- 13:Garnet

Figure B10.19: Sample S18 site 9 (SEM).



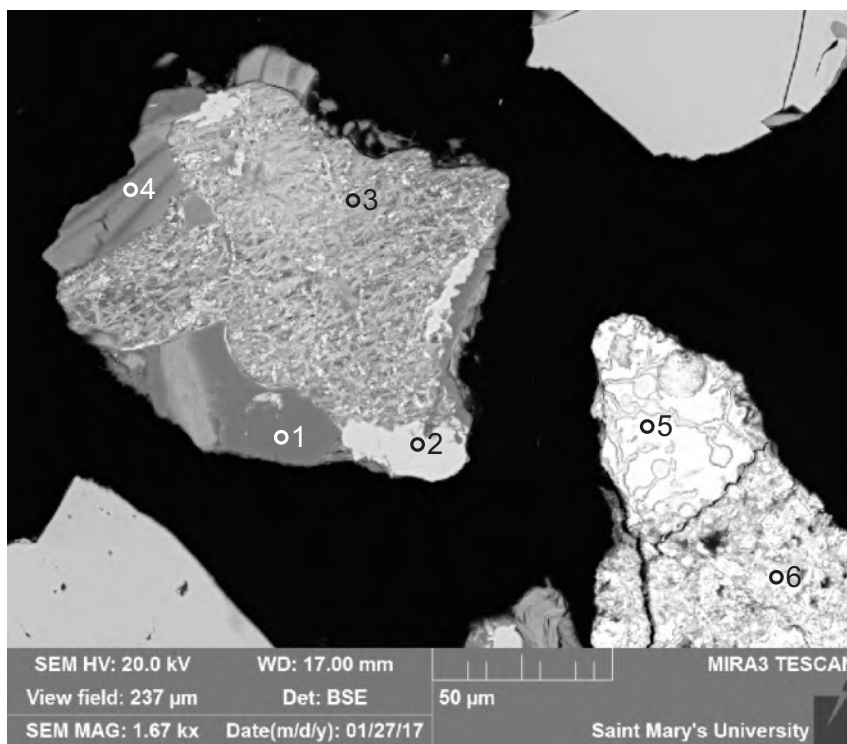

- 1:Quartz
- 2:TiO<sub>2</sub>
- 3:TiO<sub>2</sub> + Chlorite
- 4:Muscovite
- 5:"Magnetite" +
- 6:Fe-oxide/hydroxide +

Figure B10.20: Sample S18 site 9.1 (SEM). This lithic clast consists of quartz + muscovite + titania + chlorite, retrograde metamorphic.

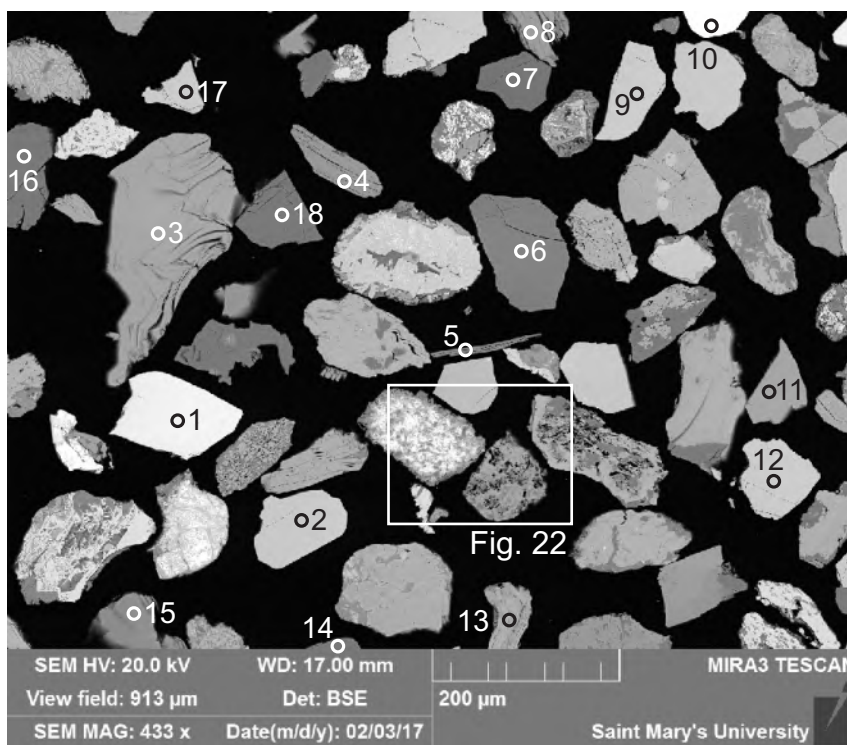

- 1:Chromite
- 2:Garnet
- 3:Chlorite
- 4:Muscovite
- 5:Muscovite
- 6:Tourmaline
- 7:Dolomite
- 8:Chlorite
- 9:Garnet
- 10:Zircon
- 11:Amphibole
- 12:Garnet
- 13:Chlorite
- 14:Paragonite
- 15:Muscovite
- 16:Dolomite
- 17:Garnet
- 18:Dolomite

Figure B10.21: Sample S18 site 10 (SEM).

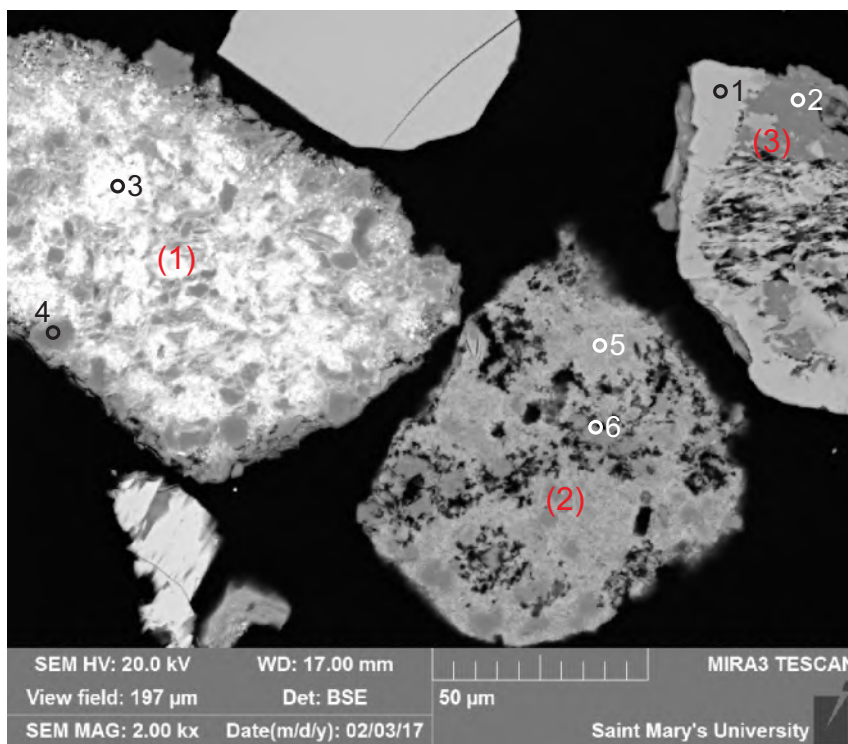

- 1:Epidote
- 2:Albite
- 3:"Magnetite" +
- 4:Kaolinite +
- 5:Apatite +
- 6:Quartz + Chlorite + Apatite

Figure B10.22: Sample S18 site 10.1 (SEM). 1: Lithic clast (kaolinite + magnetite, cf. Fig. B3.13, probably pedogenic). 2: Lithic clast (apatite + quartz, probably sedimentary). 3: Dissolved lithic clast (epidote + albite, hydrothermal).

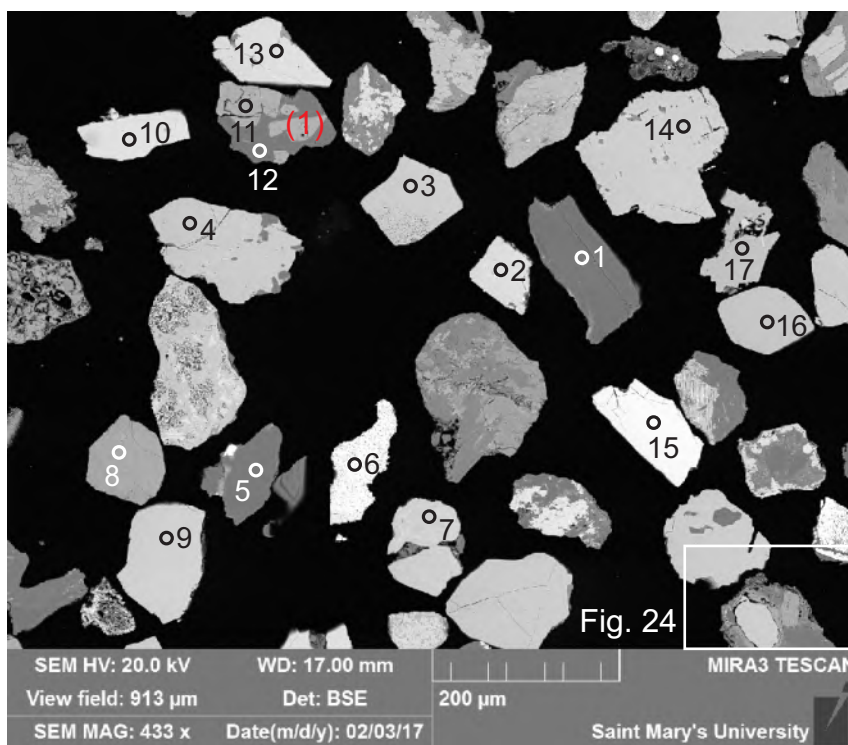

- 1:Paragonite
- 2:TiO<sub>2</sub>
- 3:Garnet
- 4:Titanite
- 5:Quartz
- 6:Chromite +
- 7:Apatite
- 8:Epidote
- 9:Garnet
- 10:TiO<sub>2</sub>
- 11:Epidote
- 12:Quartz
- 13:TiO<sub>2</sub> +
- 14:Garnet
- 15:Chromite
- 16:Apatite
- 17:Titanite

Figure B10.23: Sample S18 site 11 (SEM). 1: Lithic clast (epidote + quartz, hydrothermal).

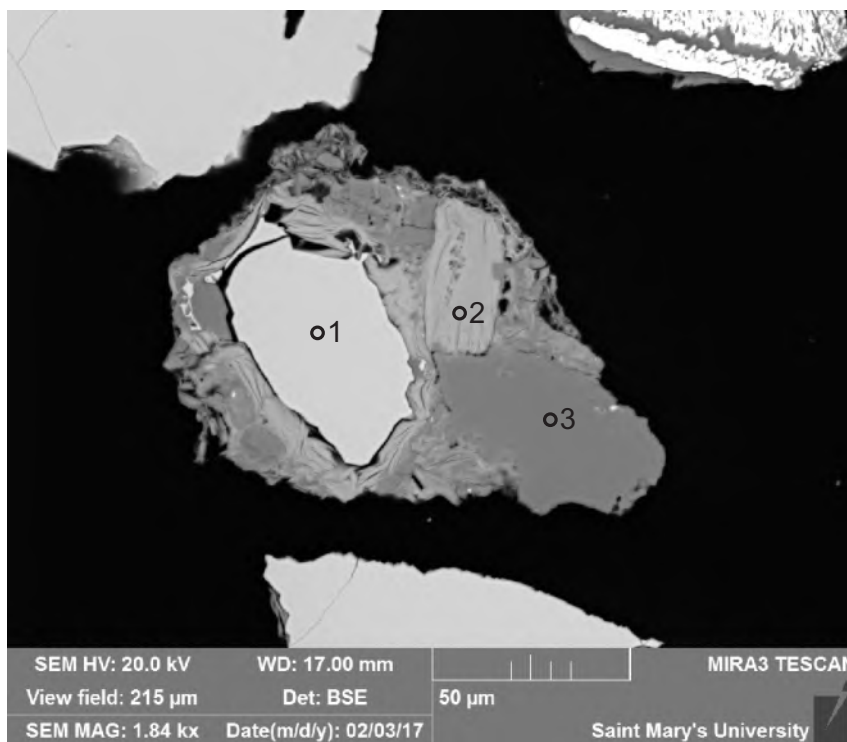

- 1:Garnet
- 2:Chlorite
- 3:Quartz

Figure B10.24: Sample S18 site 11.1 (SEM). This lithic clast consists of garnet + chlorite + quartz that are cemented together probably by ?micas/clays. Metamorphic.

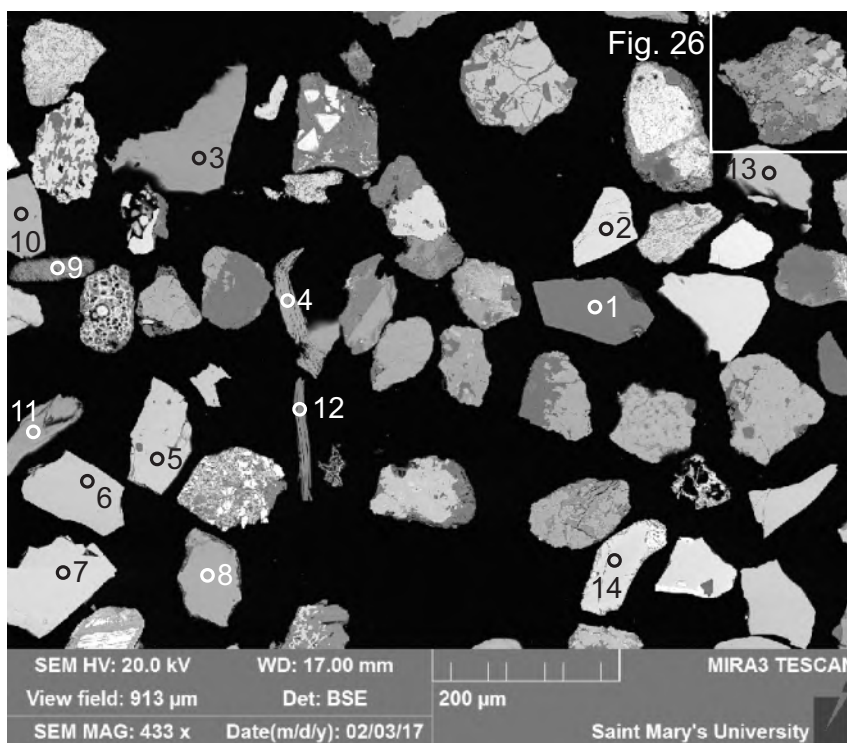

- 1:Tourmaline
- 2:Chromite
- 3:Chlorite
- 4:Chlorite
- 5:Garnet
- 6:Garnet
- 7:Spinel
- 8:Amphibole
- 9:Fluorite
- 10:Epidote
- 11:Chlorite
- 12:Muscovite
- 13:Garnet
- 14:Chromite

Figure B10.25: Sample S18 site 12 (SEM).



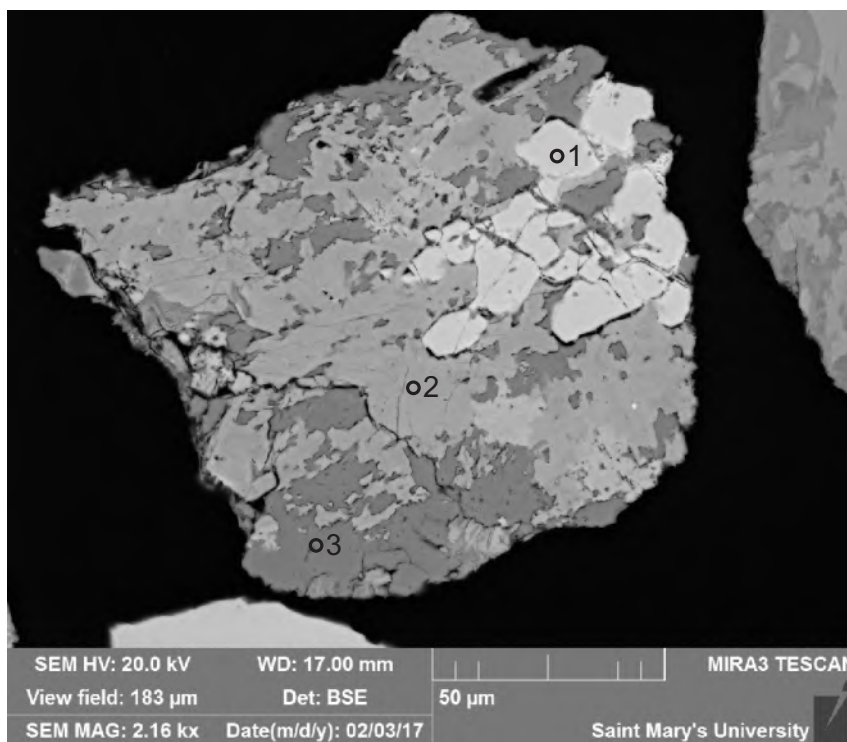

- 1: Titanite
- 2: Epidote
- 3: Albite

Figure B10.26: Sample S18 site 12.1 (SEM). This lithic clast consists of titanite + epidote + albite, hydrothermal.

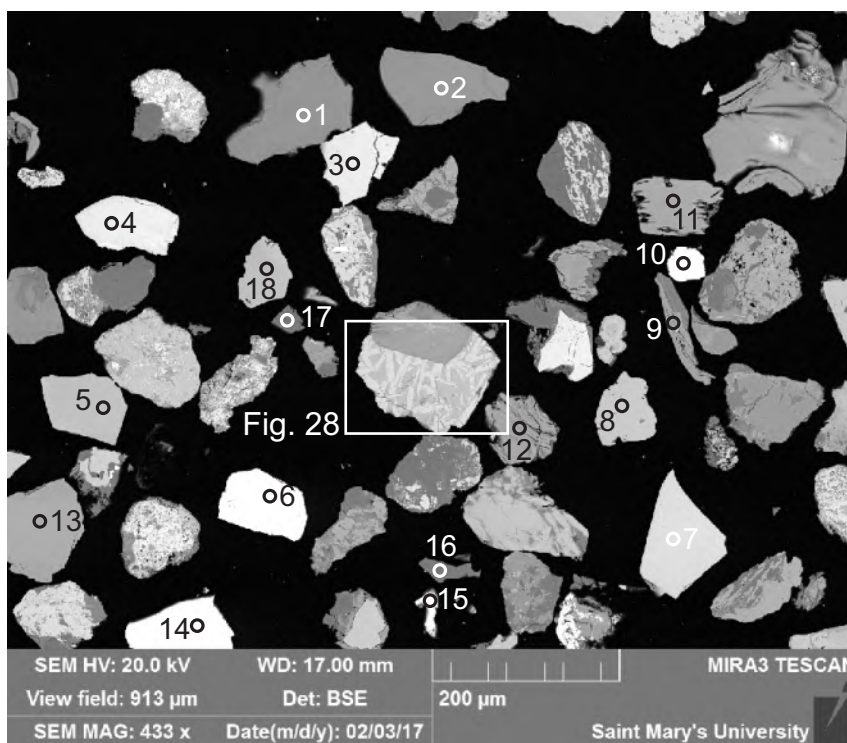

- 1: Muscovite
- 2: Muscovite
- 3: Chromite
- 4: Chromite
- 5: Apatite +
- 6: Zircon
- 7: Chromite
- 8: Garnet
- 9: Chlorite
- 10: Zircon
- 11: Amphibole
- 12: Chlorite
- 13: Epidote
- 14: Fe-oxide/hydroxide
- 15: Chromite
- 16: Tourmaline
- 17: Dolomite
- 18: Garnet

Figure B10.27: Sample S18 site 13 (SEM).

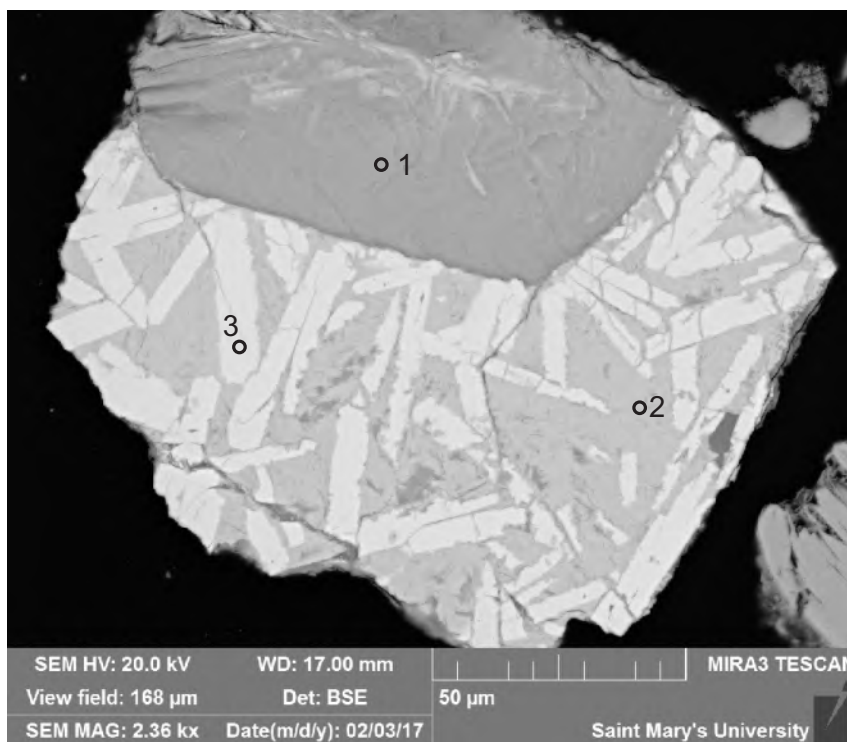

- 1:Chlorite
- 2:Titanite
- 3:TiO<sub>2</sub>

Figure B10.28: Sample S18 site 13.1 (SEM). This lithic clast consists of titanite with titania laths and a chlorite grain, metamorphic.

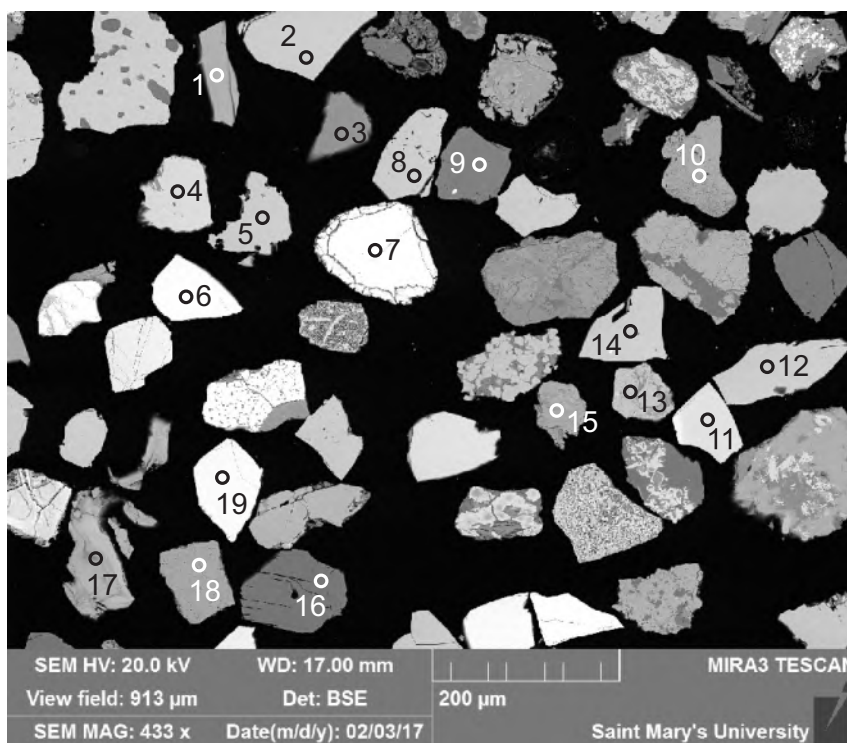

- 1:Chlorite
- 2:Garnet
- 3:Muscovite
- 4:TiO<sub>2</sub>
- 5:Garnet
- 6:Chromite
- 7:Pyrite
- 8:Garnet
- 9:Tourmaline
- 10:Epidote
- 11:Chromite
- 12:Garnet
- 13:Titanite
- 14:Garnet
- 15:Chlorite
- 16:Dolomite
- 17:Chlorite
- 18:Epidote
- 19:Chromite

Figure B10.29: Sample S18 site 14 (SEM).



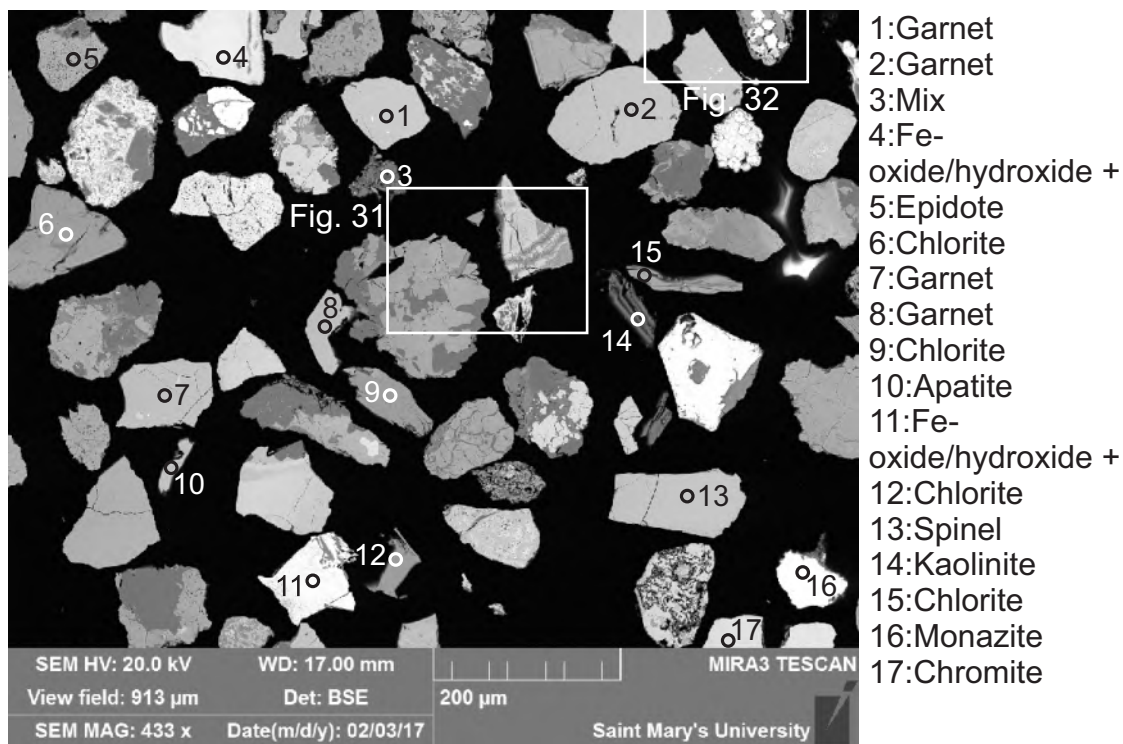

Figure B10.30: Sample S18 site 15 (SEM).

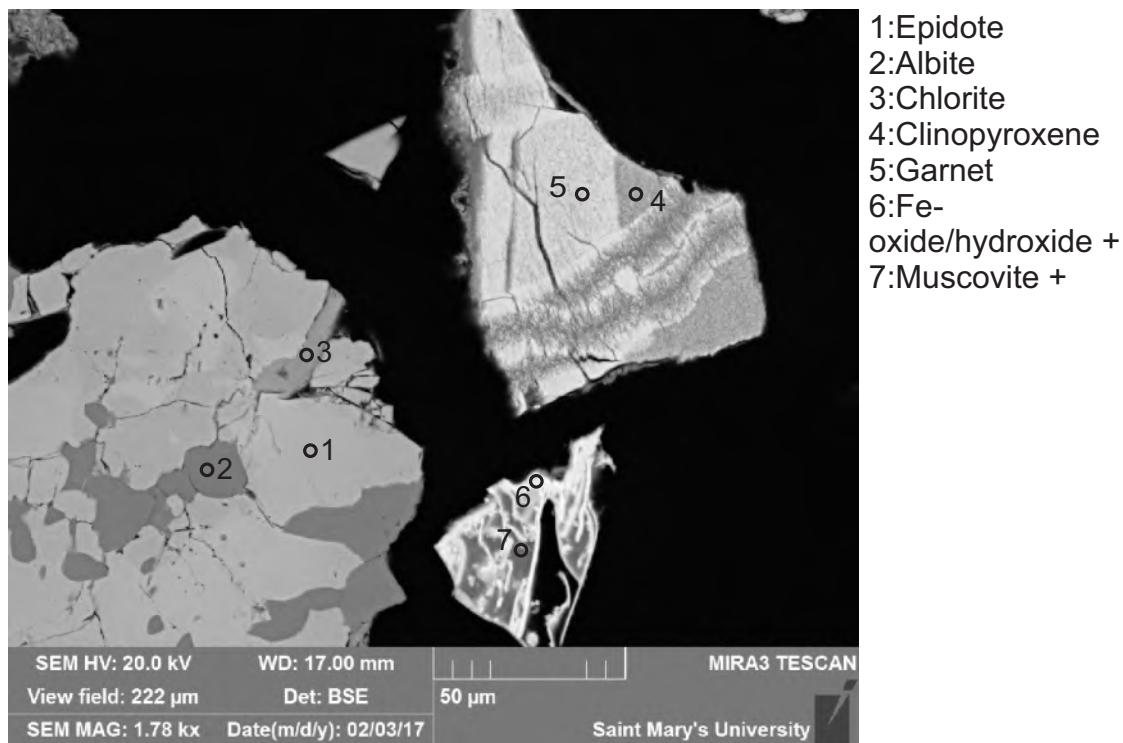

Figure B10.31: Sample S18 site 15.1 (SEM). This lithic clast consists of epidote + albite + chlorite, hydrothermal. There is also a lithic clast of garnet + clinopyroxene, cut by a late vein (not analyzed), metaophiolite.

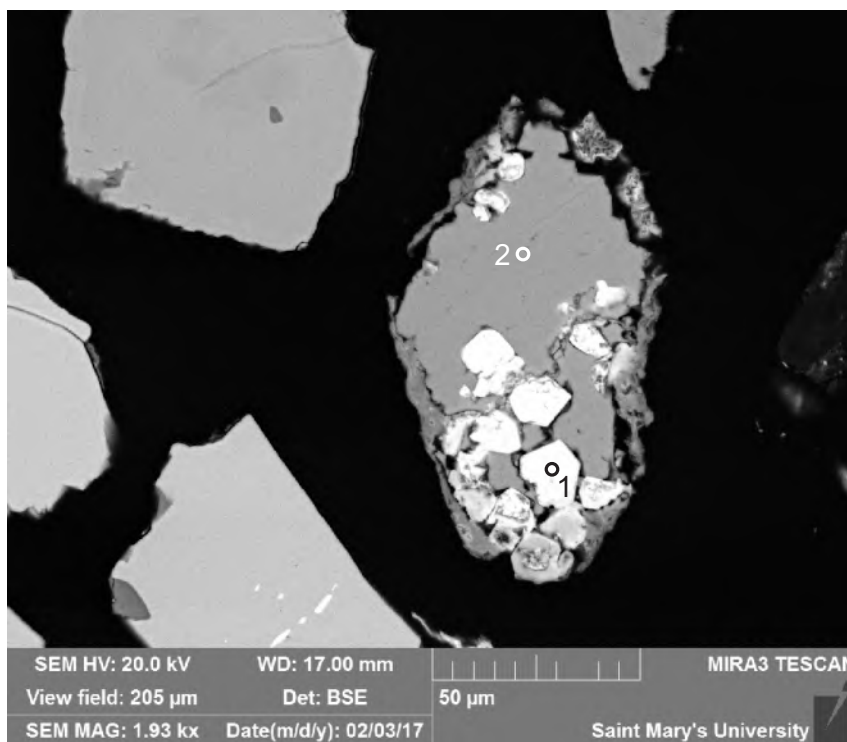

- 1:"Magnetite: +
- 2:Fluorite

Figure B10.32: Sample S18 site 15.2 (SEM). This lithic clast consists of fluorite with late magnetite grains filling porosity. Hydrothermal.

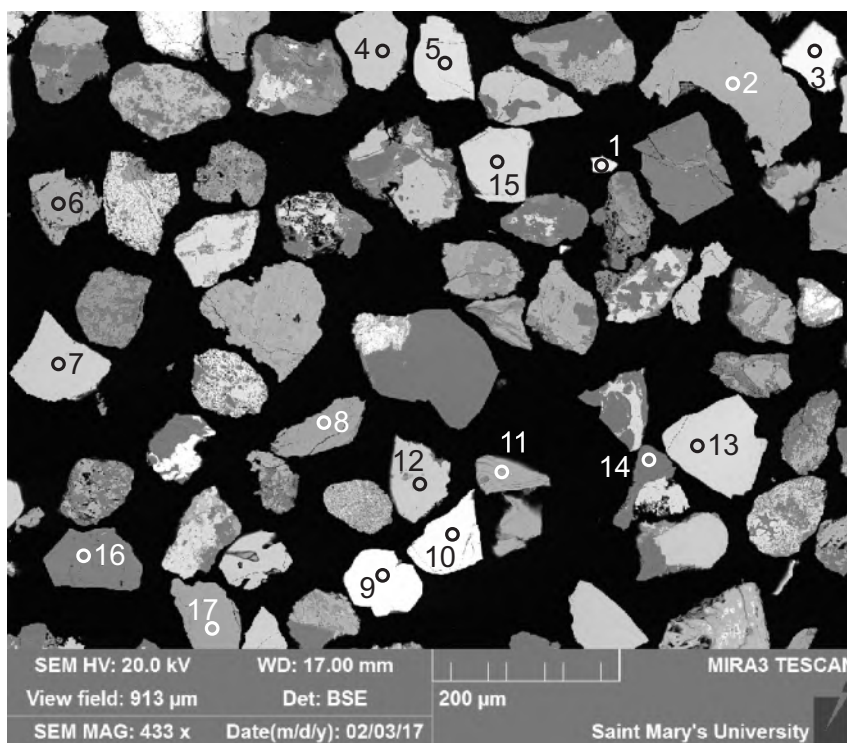

- 1:Chromite
- 2:Garnet
- 3:Chromite
- 4:Garnet
- 5:Chromite
- 6:Epidote
- 7:Garnet
- 8:Chlorite
- 9:Magnetite +
- 10:Chromite
- 11:Chlorite
- 12:Garnet
- 13:Chromite
- 14:Quartz
- 15:Chromite
- 16:Tourmaline
- 17:Amphibole

Figure B10.33: Sample S18 site 16 (SEM).

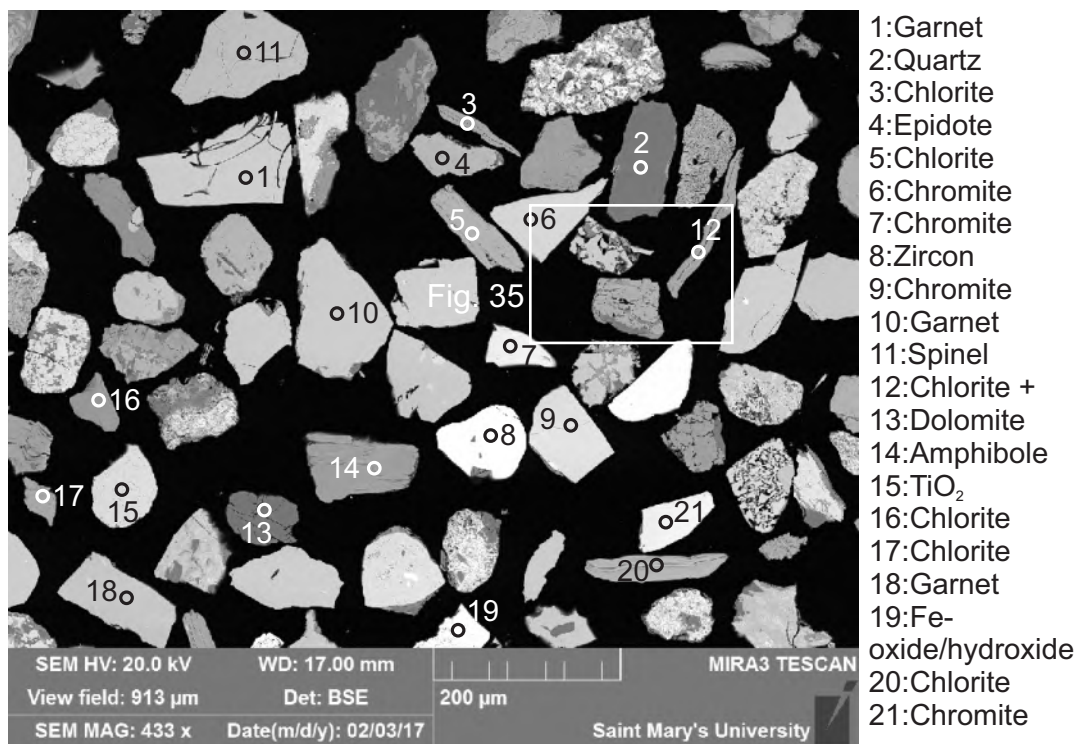

Figure B10.34: Sample S18 site 17 (SEM).

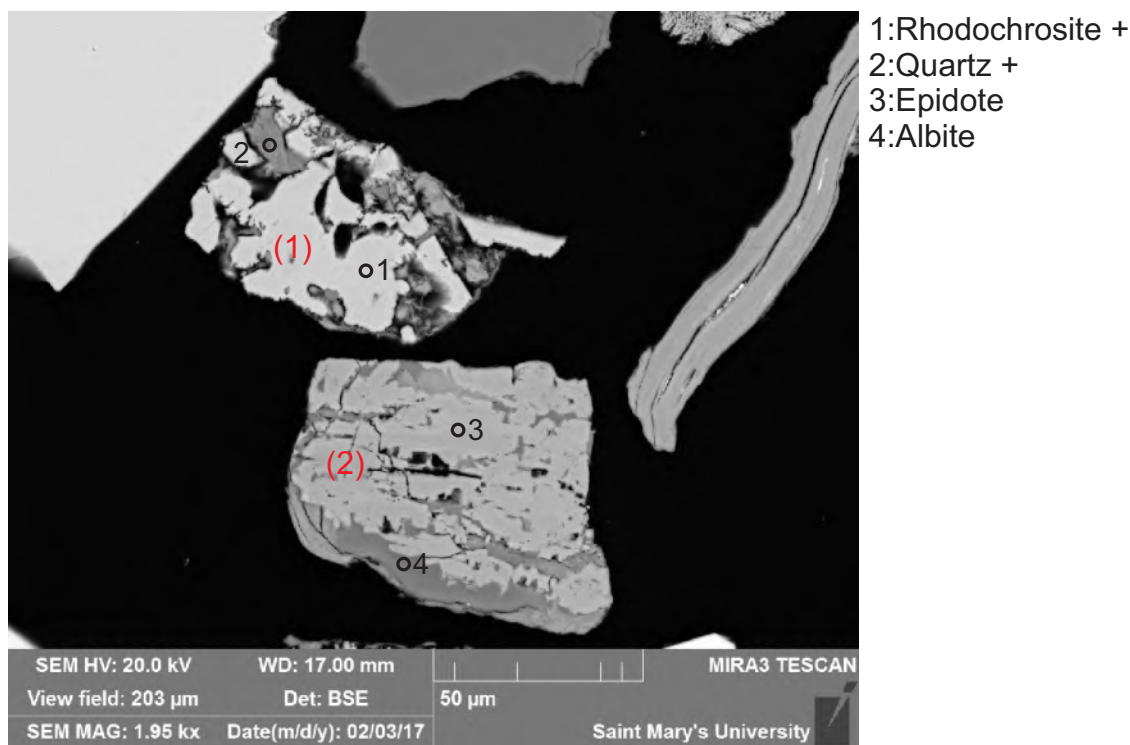

Figure B10.35: Sample S18 site 17.1 (SEM). 1: Lithic clast (rhodochrosite + quartz, probably rhodochrosite cemented siltstone). 2: Lithic clast (epidote + albite, hydrothermal).



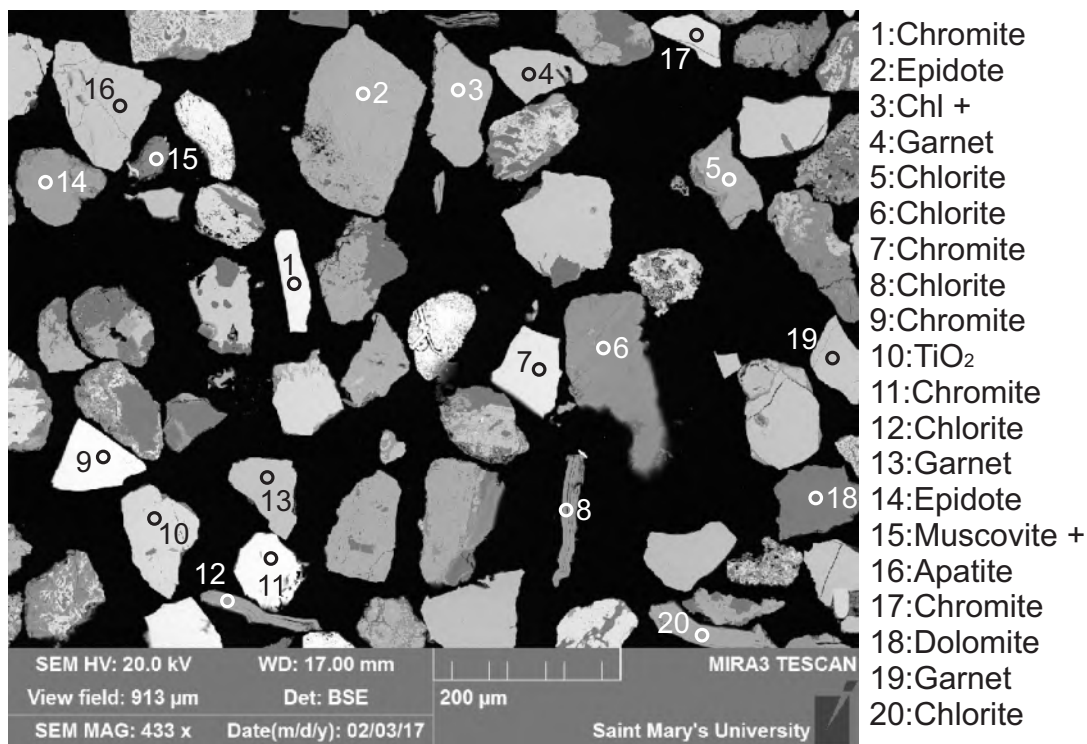

Figure B10.36: Sample S18 site 18 (SEM).

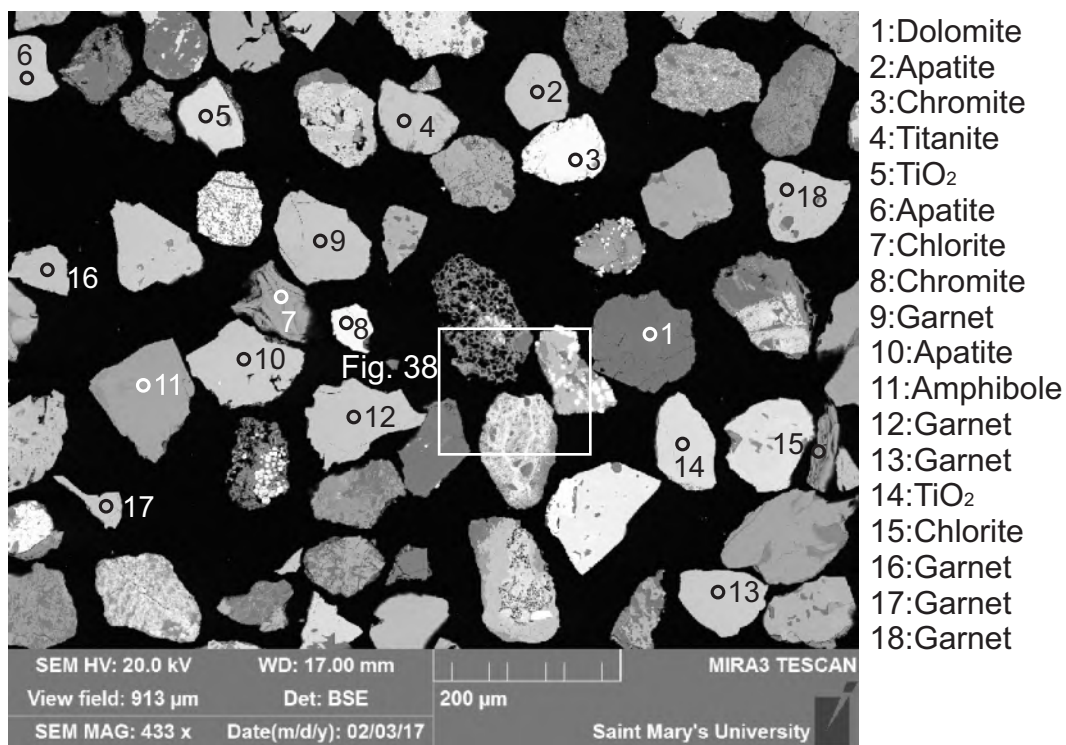

Figure B10.37: Sample S18 site 19 (SEM).

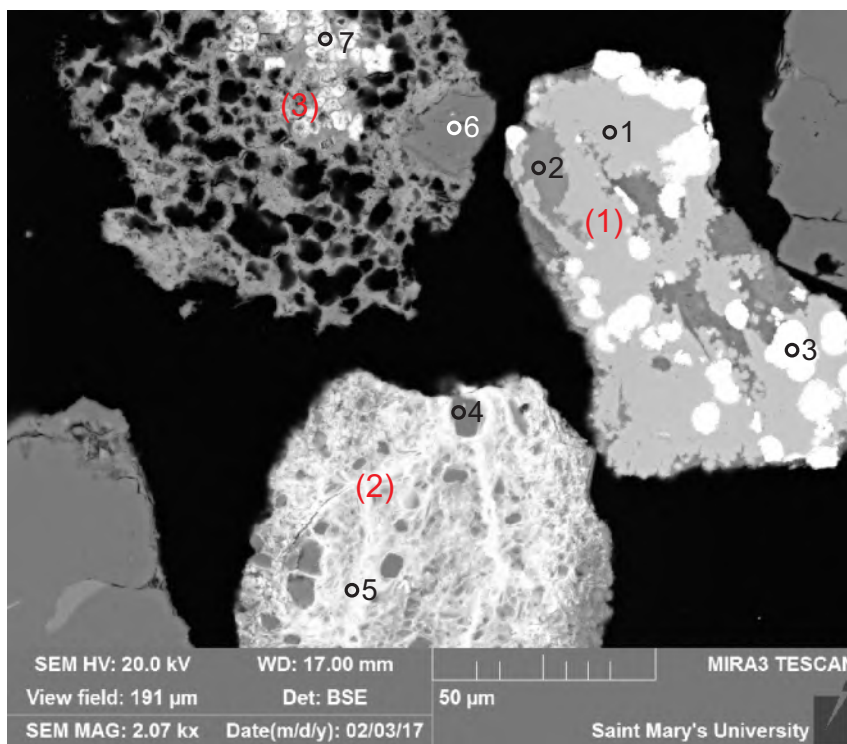

- 1: Titanite
- 2: K-feldspar
- 3: Fe-oxide/hydroxide +
- 4: Quartz
- 5: Fe-oxide/hydroxide +
- 6: Albite
- 7: Fe-oxide/hydroxide +

Figure B10.38: Sample S18 site 19.1 (SEM). 1: Lithic clast (titanite + K-feldspar + Fe-oxide/hydroxide, probably hydrothermally altered rock). 2: Lithic clast (albite + Fe-oxide/hydroxide, hydrothermal). 3: Dissolved lithic clast (albite + Fe-oxide/hydroxide, similar to (2)).

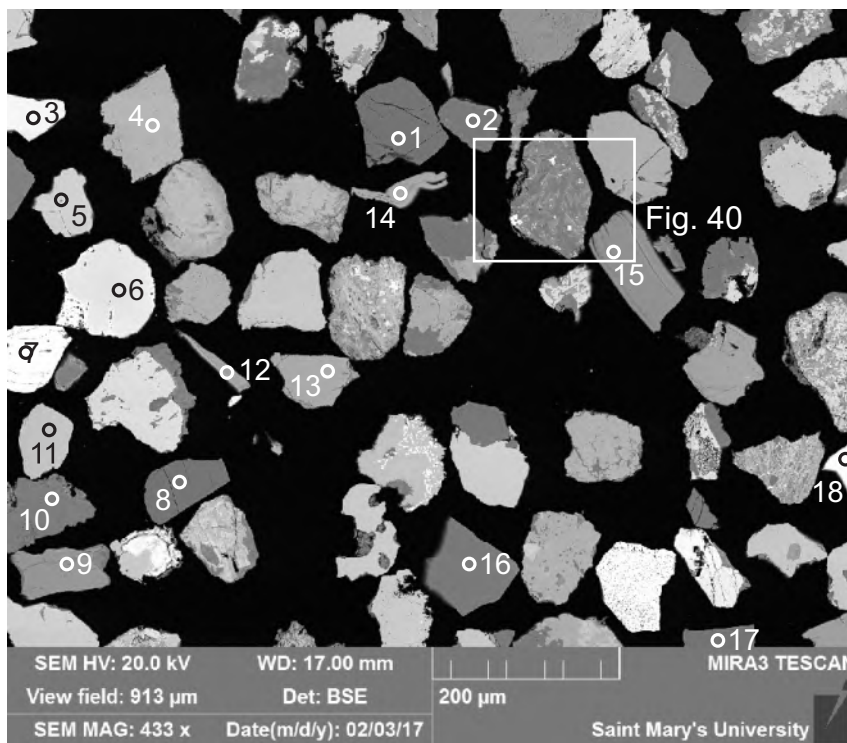

- 1: Dolomite
- 2: Quartz
- 3: Chromite
- 4: Epidote
- 5: Apatite +
- 6: Chromite
- 7: Chromite
- 8: Dolomite
- 9: Amphibole
- 10: Albite
- 11: Apatite
- 12: Chlorite
- 13: Clinopyroxene
- 14: Chlorite
- 15: Muscovite
- 16: Tourmaline
- 17: Dolomite
- 18: Chromite

Figure B10.39: Sample S18 site 20 (SEM).



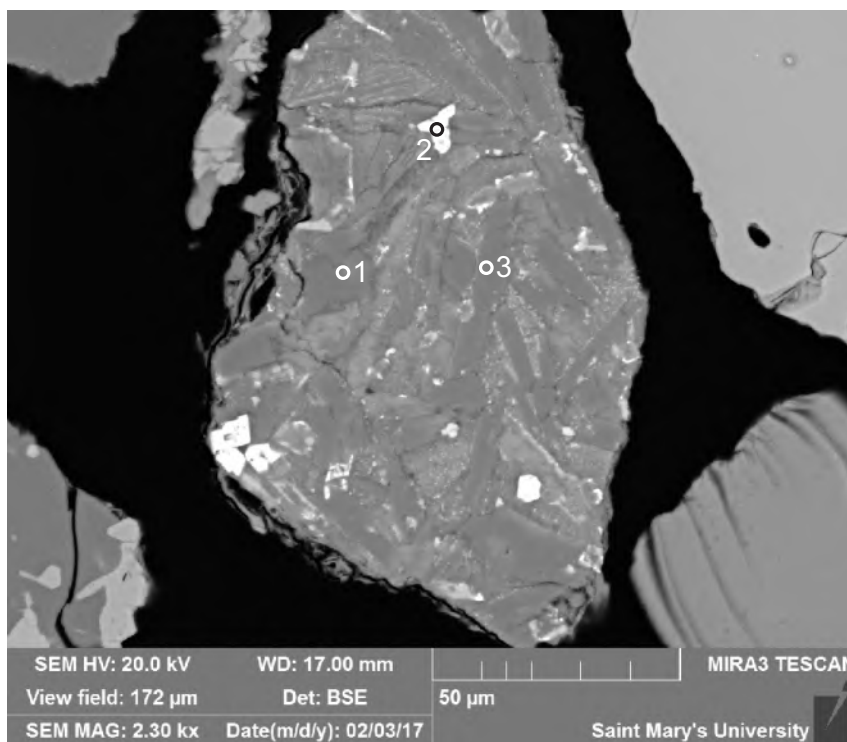

- 1:K-feldspar
- 2:Fe-oxide/hydroxide +
- 3:Albite

Figure B10.40: Sample S18 site 20.1 (SEM). This rhyolitic lithic clast consists of K-feldspar + albite + Fe-oxide/hydroxide.

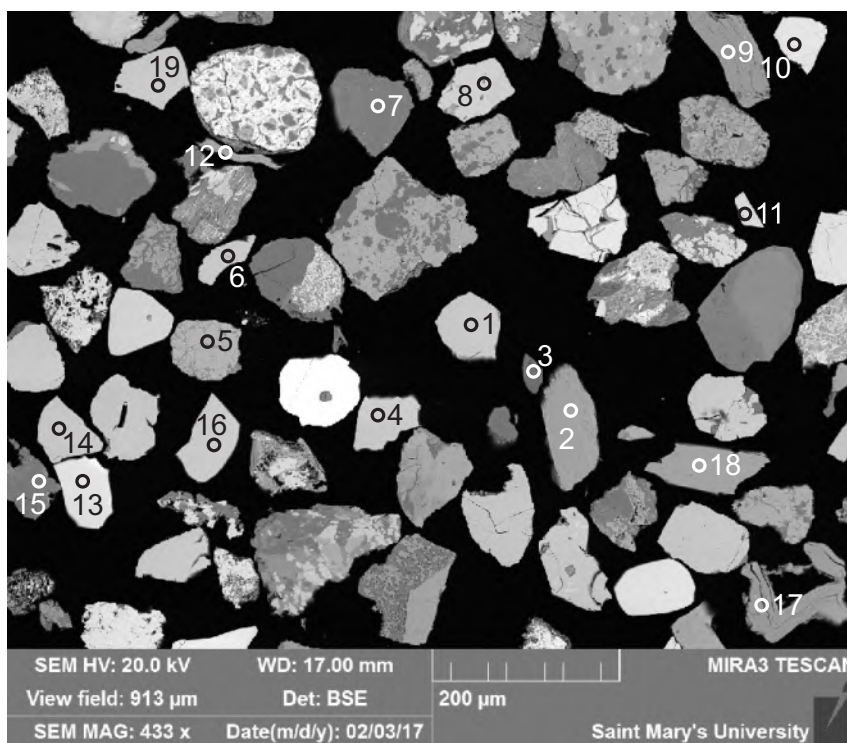

- 1:Garnet
- 2:Amphibole
- 3:Paragonite
- 4:Garnet
- 5:Epidote
- 6:Garnet
- 7:Tourmaline
- 8:Garnet
- 9:Chlorite
- 10:Chromite
- 11:Chromite
- 12:Chlorite
- 13:Chromite
- 14:Titanite
- 15:Quartz
- 16:Garnet
- 17:Chlorite
- 18:Amphibole
- 19:Garnet

Figure B10.41: Sample S18 site 21 (SEM).

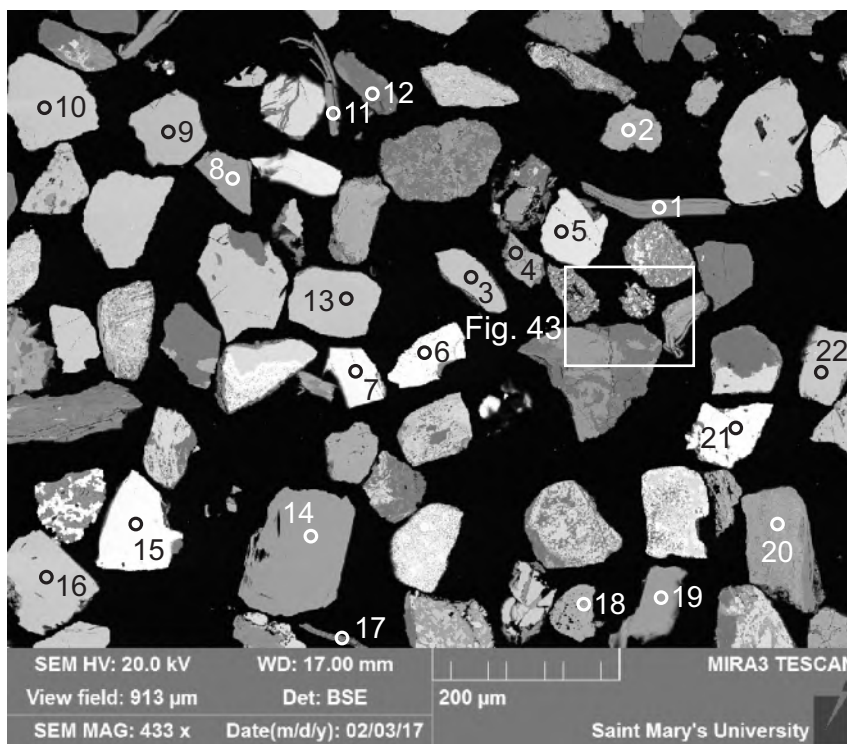

- 1: Muscovite +
- 2: Epidote
- 3: Garnet
- 4: Epidote
- 5: Chromite
- 6: Fe-oxide/hydroxide +
- 7: Chromite
- 8: Amphibole
- 9: Garnet
- 10: Garnet
- 11: Muscovite
- 12: Quartz
- 13: Titanite
- 14: Clinopyroxene
- 15: Chromite
- 16: Garnet
- 17: Hole
- 18: Epidote
- 19: Chlorite
- 20: Epidote
- 21: Ilmenite
- 22: Garnet

Figure B10.42: Sample S18 site 22 (SEM).

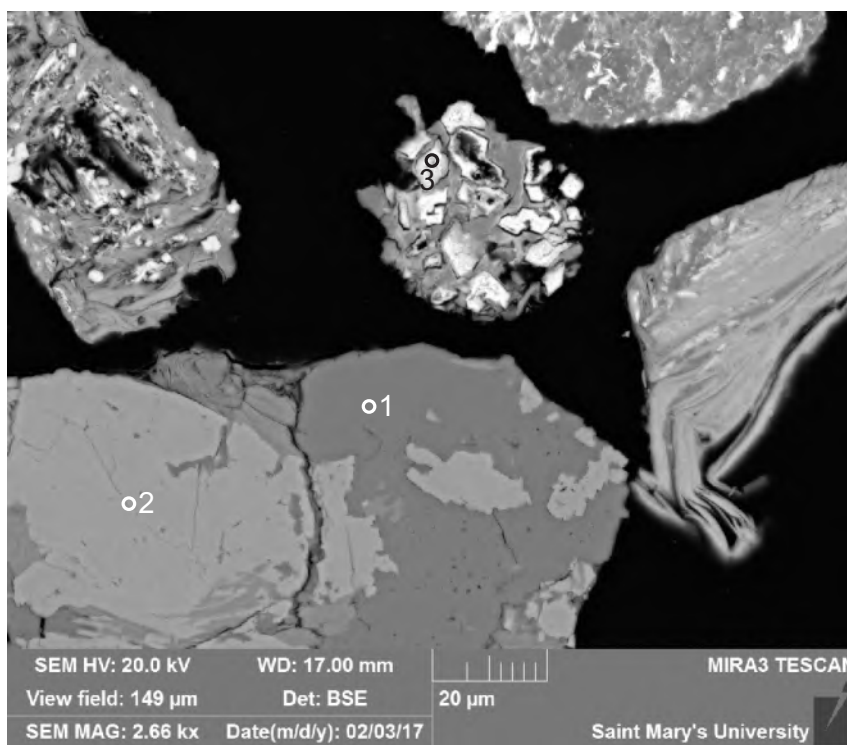

- 1: Albite
- 2: Epidote
- 3: Fe-oxide/hydroxide +

Figure B10.43: Sample S18 site 22.1 (SEM). This lithic clast consists of albite + epidote, hydrothermal.

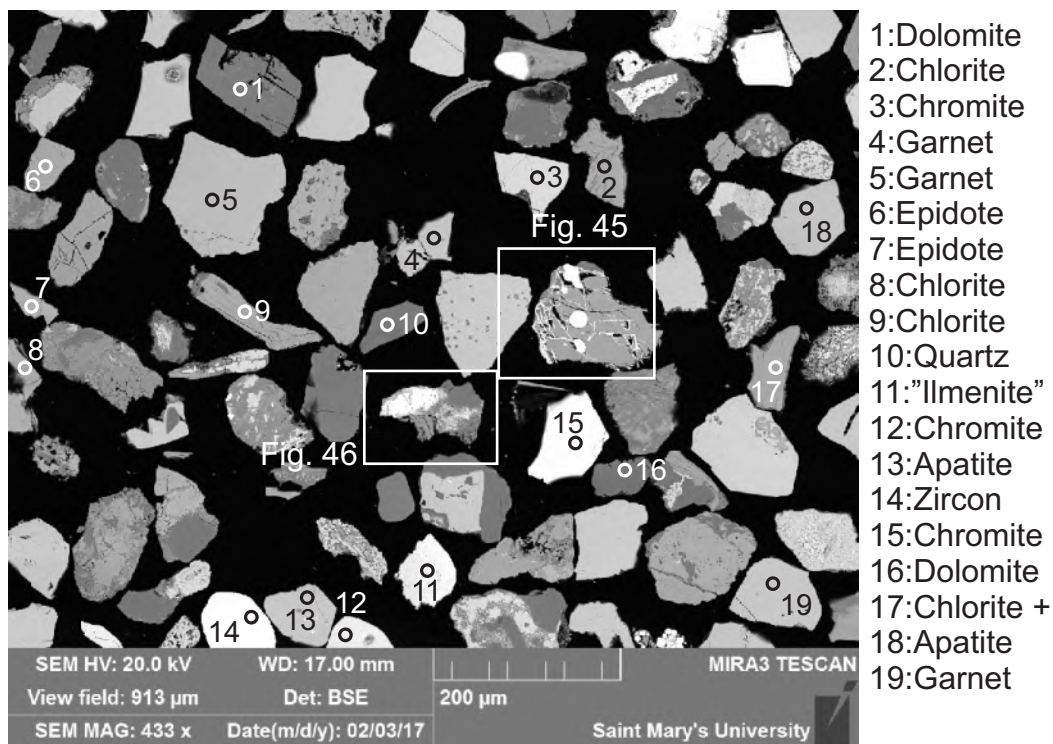

Figure B10.44: Sample S18 site 23 (SEM).

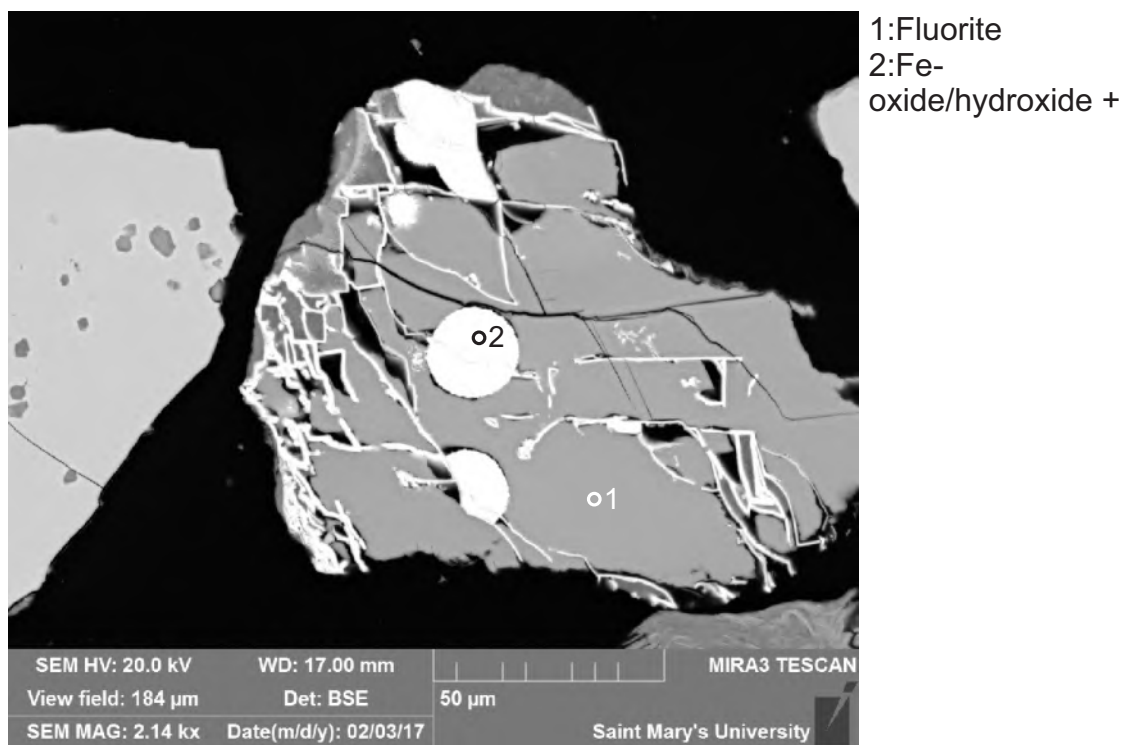

Figure B10.45: Sample S18 site 23.1 (SEM). This lithic clast consists of fluorite + Fe-oxide/hydroxide fillings fractures.



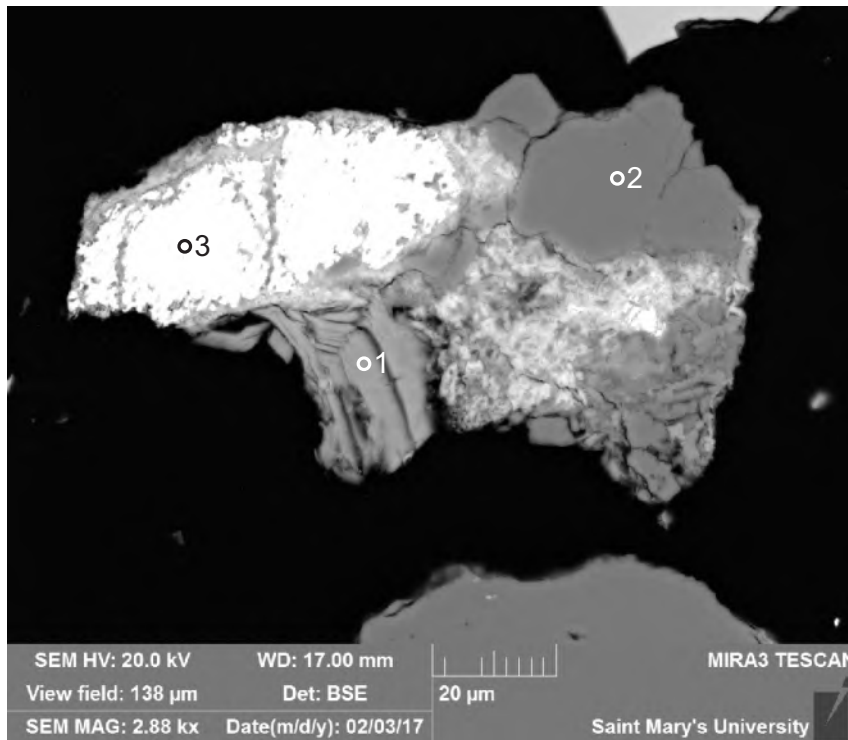

- 1:Chlorite
- 2:Quartz
- 3:Ilmenite

Figure B10.46: Sample S18 site 23.2 (SEM). This lithic clast consists of chlorite + quartz + ilmenite, probably metamorphic.

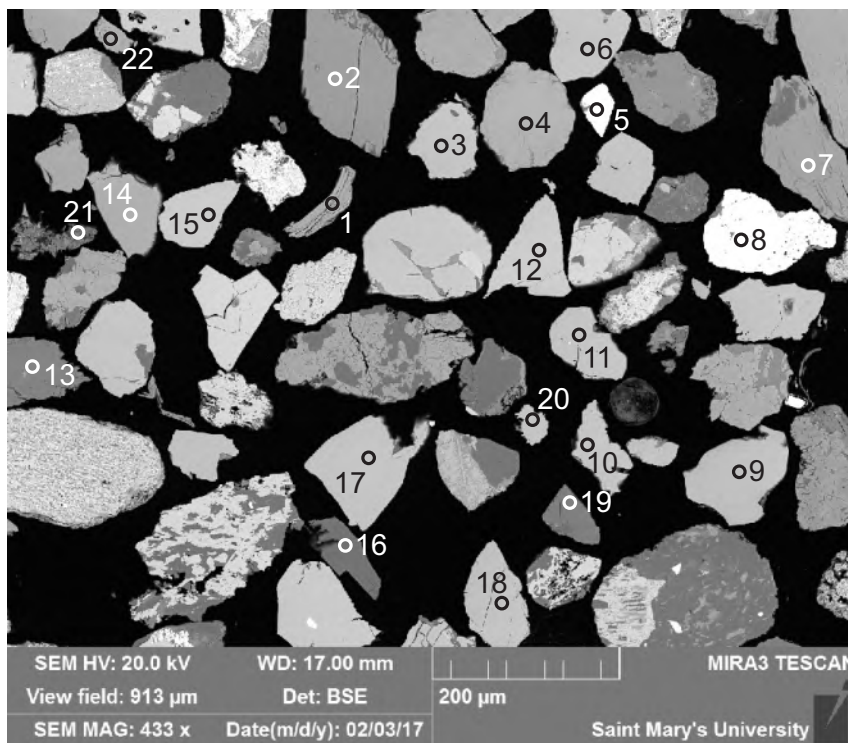

- 1:Chlorite +
- 2:Amphibole
- 3:Garnet
- 4:Chlorite
- 5:Zircon
- 6:Titanite
- 7:Chlorite
- 8:Zircon
- 9:Spinel
- 10:Garnet
- 11:Garnet
- 12:Garnet
- 13: ?Margarite (mica) +
- 14:Garnet
- 15:Garnet
- 16:Dolomite
- 17:Titanite
- 18:Apatite
- 19:Tourmaline
- 20:Garnet
- 21:K-feldspar
- 22:Epidote

Figure B10.47: Sample S18 site 24 (SEM).

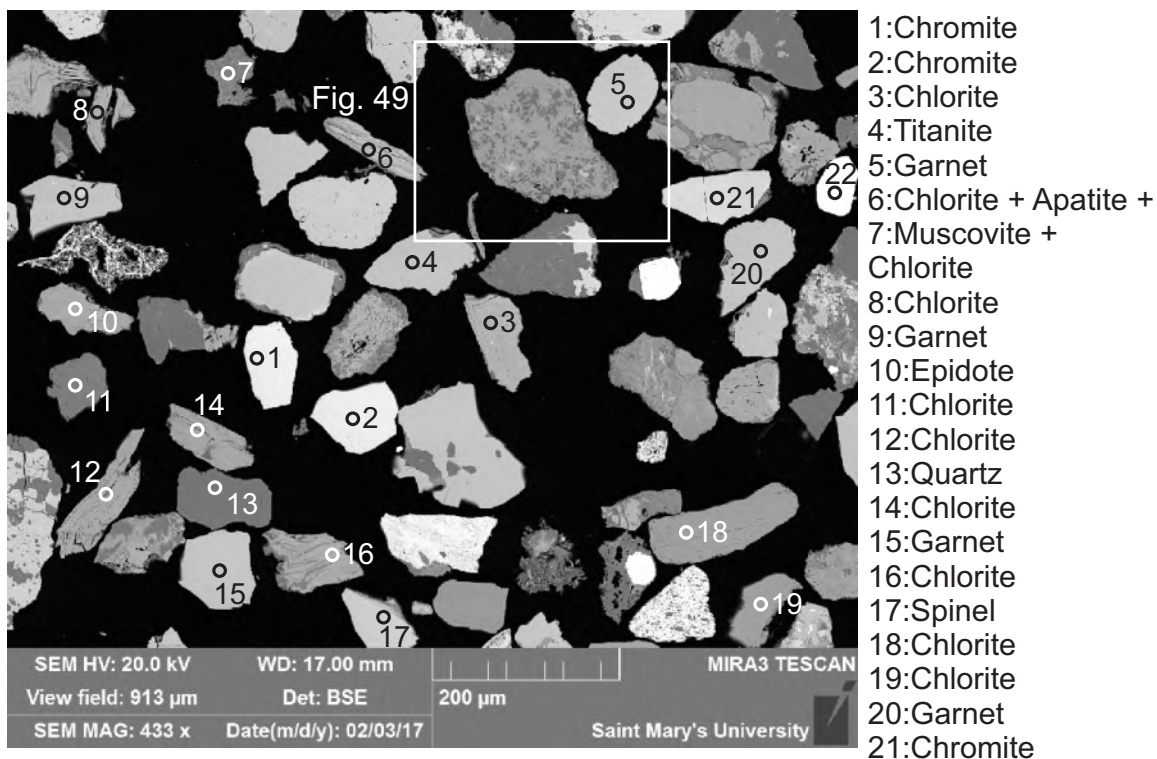

Figure B10.48: Sample S18 site 25 (SEM).

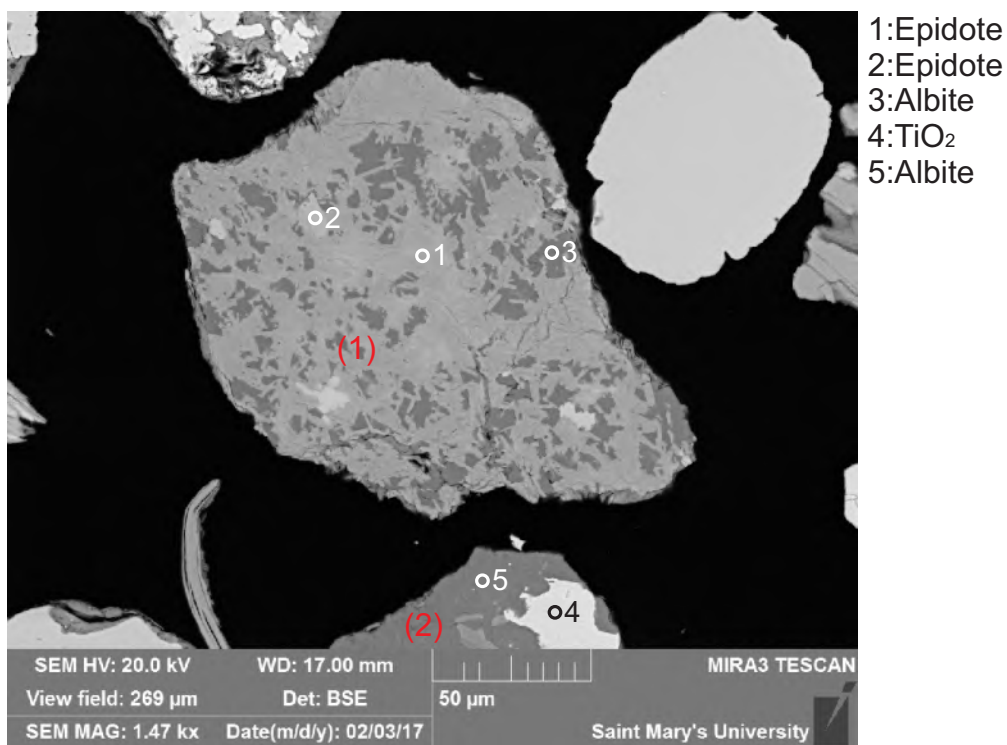

Figure B10.49: Sample S18 site 25.1 (SEM). 1: Lithic clast (epidote + albite, hydrothermal). 2: Lithic clast (albite + titania, metamorphic).



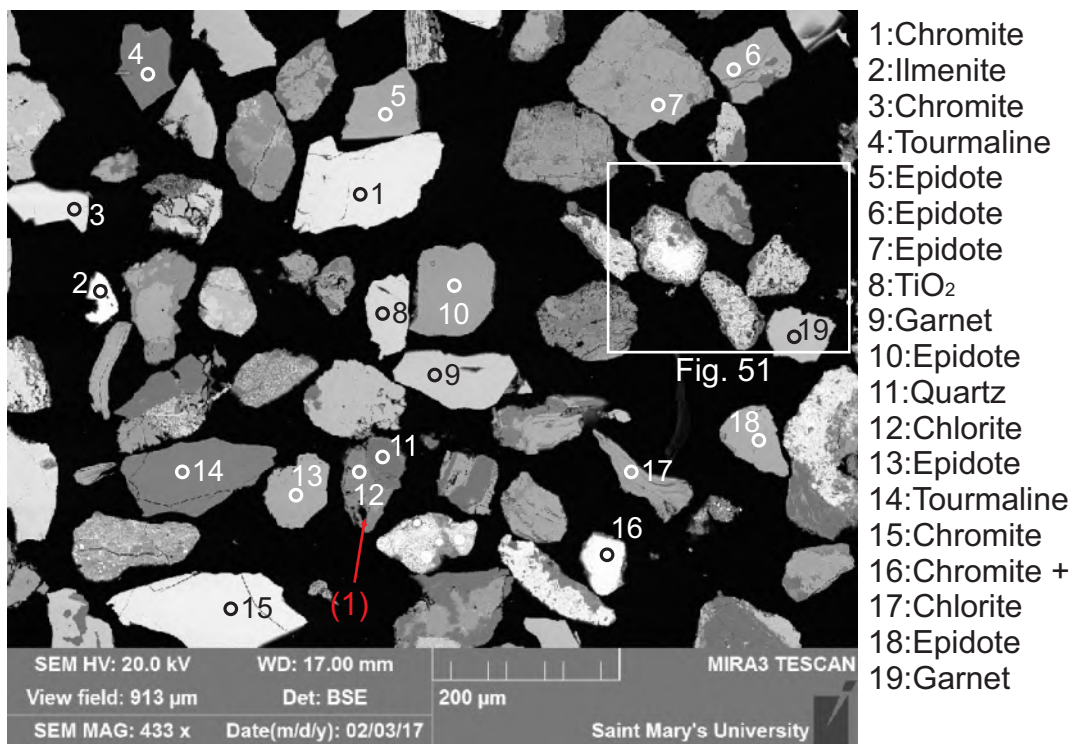

Figure B10.50: Sample S18 site 26 (SEM). 1: Lithic clast (quartz + chlorite).

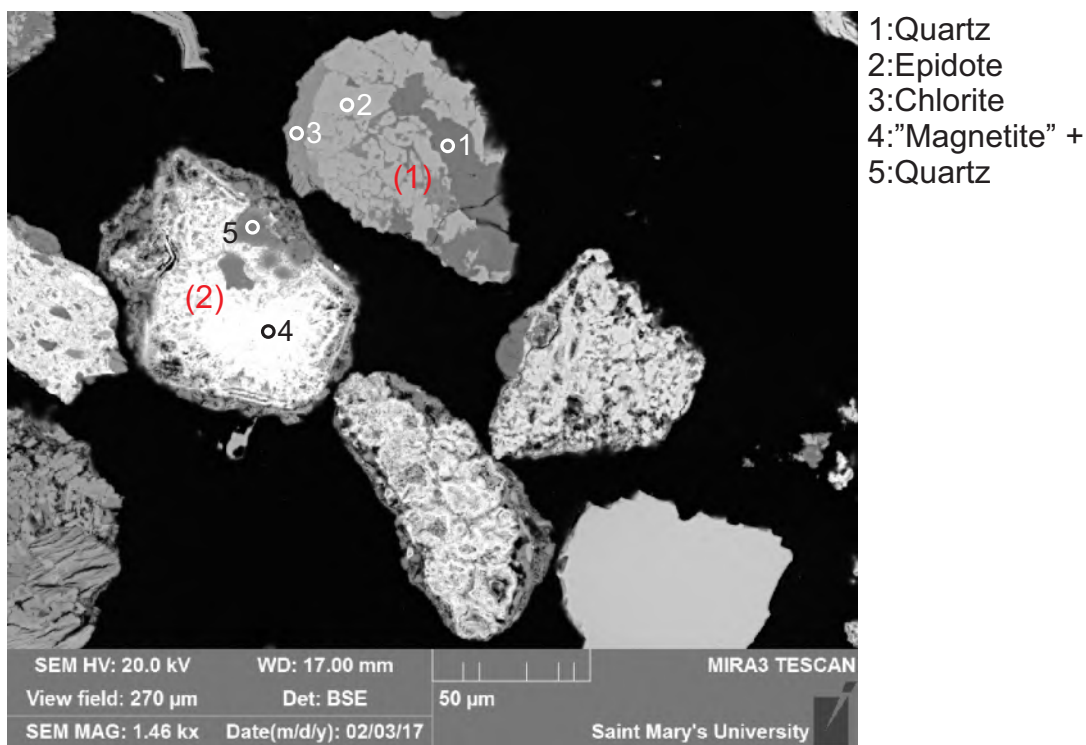

Figure B10.51: Sample S18 site 26.1 (SEM). 1: Lithic clast (quartz + chlorite + epidote, hydrothermal). 2: Lithic clast (quartz + magnetite, hydrothermal).

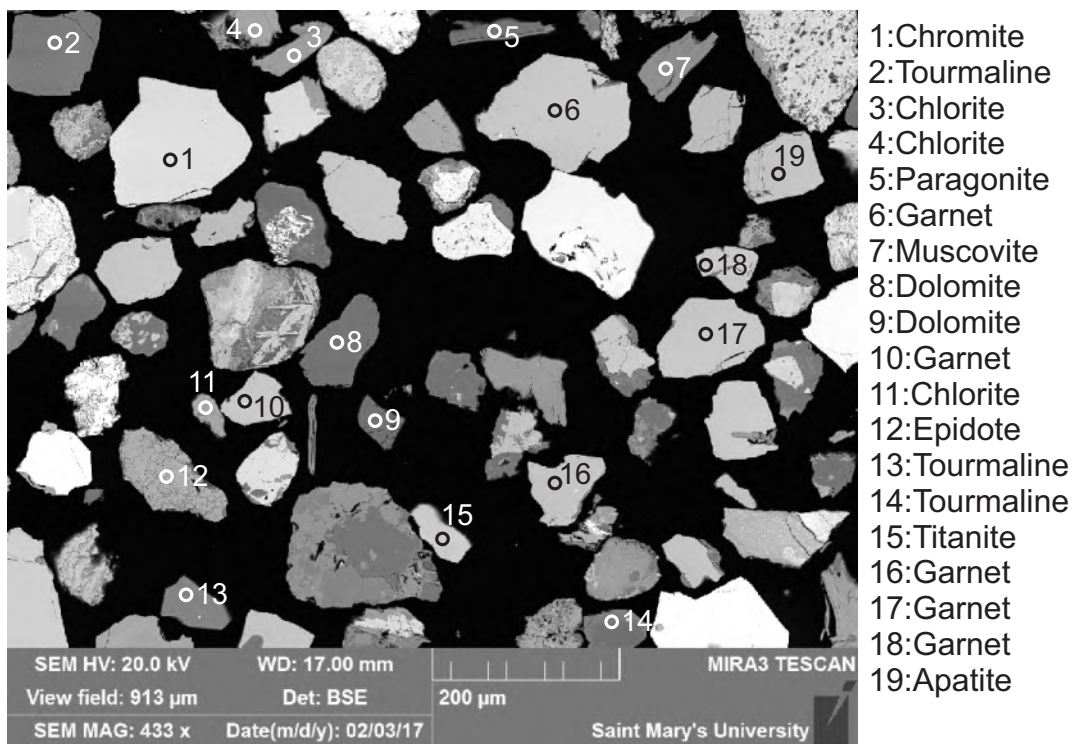

Figure B10.52: Sample S18 site 27 (SEM).

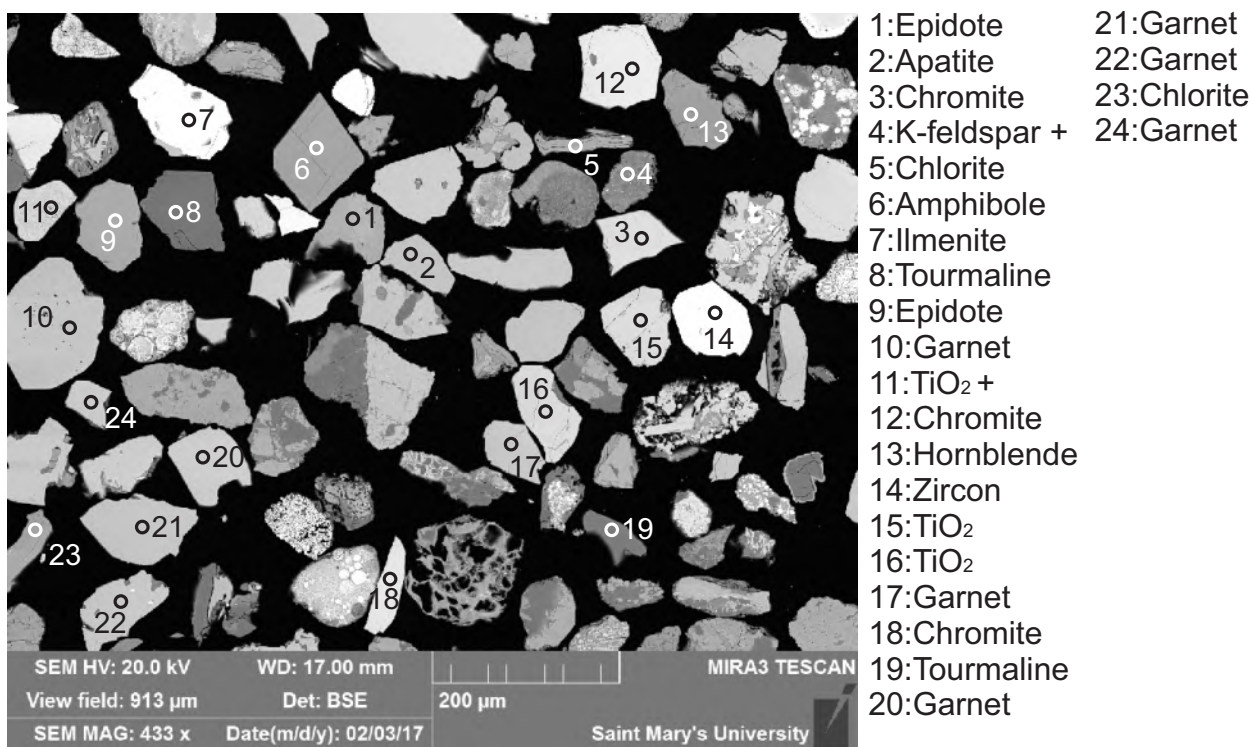

Figure B10.53: Sample S18 site 28 (SEM).

Table B10.1: EDS analyses of sample S18.

| Sample | Site | Position | Mineral | SiO2   | TiO2  | Al2O3 | FeO   | MnO  | MgO   | CaO   | Na2O  | K2O   | P2O5 | SO3   | F | Cl | V2O5 | Cr2O3 | ZnO | ZrO2  | HfO2 | WO3 | Total | Actual Total |
|--------|------|----------|---------|--------|-------|-------|-------|------|-------|-------|-------|-------|------|-------|---|----|------|-------|-----|-------|------|-----|-------|--------------|
| S18    | 1    | 1        | Ep      | 40.58  |       | 25.48 | 8.86  | 0.36 |       | 21.72 |       |       |      |       |   |    |      |       |     |       |      |     | 97    | 109          |
| S18    | 1    | 2        | Ep      | 40.63  |       | 22.95 | 11.20 |      |       | 22.21 |       |       |      |       |   |    |      |       |     |       |      |     | 97    | 109          |
| S18    | 1    | 3        | Spl     |        |       | 26.25 | 22.50 |      | 12.48 |       |       |       |      |       |   |    |      | 38.76 |     |       |      |     | 100   | 109          |
| S18    | 1    | 4        | Grt     | 39.54  |       | 21.13 | 29.89 | 3.50 | 3.12  | 2.82  |       |       |      |       |   |    |      |       |     |       |      |     | 100   | 113          |
| S18    | 1    | 5        | Chl     | 25.40  |       | 21.99 | 24.88 |      | 12.37 |       | 0.37  |       |      |       |   |    |      |       |     |       |      |     | 85    | 102          |
| S18    | 1    | 6        | Ms      | 48.39  | 0.81  | 27.70 | 5.67  |      | 1.54  |       | 0.34  | 10.55 |      |       |   |    |      |       |     |       |      |     | 95    | 109          |
| S18    | 1    | 7        | Ab      | 66.00  |       | 20.96 |       |      |       | 2.71  | 10.33 |       |      |       |   |    |      |       |     |       |      |     | 100   | 119          |
| S18    | 1    | 8        | Ep      | 41.19  |       | 22.56 | 11.84 |      | 0.89  | 20.52 |       |       |      |       |   |    |      |       |     |       |      |     | 97    | 108          |
| S18    | 1    | 9        | Chr     |        |       | 10.03 | 23.63 |      | 9.08  |       |       |       |      |       |   |    |      | 57.26 |     |       |      |     | 100   | 109          |
| S18    | 1    | 10       | Ep      | 40.61  |       | 24.38 | 9.35  | 0.34 |       | 22.32 |       |       |      |       |   |    |      |       |     |       |      |     | 97    | 110          |
| S18    | 1    | 11       | Zrn     | 31.03  |       |       |       |      |       |       |       |       |      |       |   |    |      |       |     | 67.38 | 1.59 |     | 100   | 119          |
| S18    | 1    | 12       | Chr     |        |       | 22.06 | 16.23 |      | 14.14 |       |       |       |      |       |   |    |      | 47.57 |     |       |      |     | 100   | 106          |
| S18    | 1    | 13       | Py      | 4.98   |       |       | 65.81 |      |       | 0.32  | 0.54  |       |      | 28.36 |   |    |      |       |     |       |      |     | 100   | 108          |
| S18    | 1.1  | 1        | Chl     | 33.77  |       | 15.10 | 14.00 |      | 21.29 | 0.48  | 0.37  |       |      |       |   |    |      |       |     |       |      |     | 85    | 98           |
| S18    | 1.1  | 2        | Ep      | 40.70  |       | 23.42 | 11.44 |      | 1.45  | 20.00 |       |       |      |       |   |    |      |       |     |       |      |     | 97    | 108          |
| S18    | 1.1  | 3        | Ab      | 69.58  |       | 18.83 |       |      |       |       | 11.58 |       |      |       |   |    |      |       |     |       |      |     | 100   | 118          |
| S18    | 1.1  | 4        | TiO2 +  | 14.20  | 80.08 | 3.18  | 1.84  |      |       |       | 0.70  |       |      |       |   |    |      |       |     |       |      |     | 100   | 98           |
| S18    | 1.1  | 5        | TiO2 +  | 3.87   | 88.29 | 2.20  | 4.45  |      | 0.66  | 0.52  |       |       |      |       |   |    |      |       |     |       |      |     | 100   | 106          |
| S18    | 1.1  | 6        | Bt +    | 49.76  | 4.37  | 24.01 | 4.64  |      | 2.99  |       |       | 10.24 |      |       |   |    |      |       |     |       |      |     | 96    | 111          |
| S18    | 1.1  | 7        | TiO2    | 0.72   | 97.79 |       | 1.17  |      |       | 0.32  |       |       |      |       |   |    |      |       |     |       |      |     | 100   | 107          |
| S18    | 1.1  | 8        | Ab      | 69.59  | 0.30  | 18.60 |       |      |       |       | 11.50 |       |      |       |   |    |      |       |     |       |      |     | 100   | 116          |
| S18    | 2    | 1        | Ms      | 51.10  | 0.43  | 24.86 | 4.40  |      | 3.63  |       | 0.34  | 10.24 |      |       |   |    |      |       |     |       |      |     | 95    | 107          |
| S18    | 2    | 2        | Chr     |        | 0.58  | 23.60 | 19.46 |      | 14.22 |       |       |       |      |       |   |    | 0.38 | 41.75 |     |       |      |     | 100   | 112          |
| S18    | 2    | 3        | Grt     | 40.61  |       | 21.57 | 25.30 | 0.95 | 6.53  | 5.04  |       |       |      |       |   |    |      |       |     |       |      |     | 100   | 116          |
| S18    | 2    | 4        | Grt     | 40.42  |       | 21.30 | 25.03 | 0.82 | 4.29  | 8.15  |       |       |      |       |   |    |      |       |     |       |      |     | 100   | 117          |
| S18    | 2    | 5        | Grt     | 39.60  |       | 20.89 | 32.75 | 0.55 | 1.83  | 4.37  |       |       |      |       |   |    |      |       |     |       |      |     | 100   | 114          |
| S18    | 2    | 6        | Ep      | 40.20  | 0.42  | 23.09 | 10.78 |      |       | 22.52 |       |       |      |       |   |    |      |       |     |       |      |     | 97    | 110          |
| S18    | 2    | 7        | Ep      | 40.45  |       | 24.32 | 10.00 |      |       | 22.23 |       |       |      |       |   |    |      |       |     |       |      |     | 97    | 111          |
| S18    | 2    | 8        | Grt     | 39.85  |       | 21.01 | 27.84 | 4.00 | 2.75  | 4.56  |       |       |      |       |   |    |      |       |     |       |      |     | 100   | 116          |
| S18    | 2    | 9        | Grt     | 39.94  |       | 21.09 | 28.27 | 2.56 | 3.51  | 4.63  |       |       |      |       |   |    |      |       |     |       |      |     | 100   | 111          |
| S18    | 2    | 10       | Qz      | 100.00 |       |       |       |      |       |       |       |       |      |       |   |    |      |       |     |       |      |     | 100   | 120          |
| S18    | 2    | 11       | Chl     | 26.21  |       | 22.31 | 20.92 |      | 15.56 |       |       |       |      |       |   |    |      |       |     |       |      |     | 85    | 104          |
| S18    | 2    | 12       | TiO2    | 3.67   | 94.06 | 1.08  | 0.67  |      |       |       |       |       |      |       |   |    |      | 0.53  |     |       |      |     | 100   | 109          |
| S18    | 2    | 13       | Chl     | 26.24  |       | 21.00 | 24.95 | 0.39 | 12.42 |       |       |       |      |       |   |    |      |       |     |       |      |     | 85    | 98           |
| S18    | 2.1  | 1        | Ab      | 66.72  |       | 21.29 | 0.31  |      |       | 0.78  | 9.84  | 1.05  |      |       |   |    |      |       |     |       |      |     | 100   | 116          |
| S18    | 2.1  | 2        | Ep      | 40.10  |       | 19.26 | 7.01  |      | 2.09  | 28.53 |       |       |      |       |   |    |      |       |     |       |      |     | 97    | 99           |

Table B10.1: EDS analyses of sample S18.

| Sample | Site | Position | Mineral  | SiO2   | TiO2   | Al2O3 | FeO   | MnO  | MgO   | CaO   | Na2O  | K2O  | P2O5  | SO3   | F    | Cl   | V2O5 | Cr2O3 | ZnO | ZrO2 | HfO2 | WO3  | Total | Actual Total |
|--------|------|----------|----------|--------|--------|-------|-------|------|-------|-------|-------|------|-------|-------|------|------|------|-------|-----|------|------|------|-------|--------------|
| S18    | 2.1  | 3        | Qz       | 100.00 |        |       |       |      |       |       |       |      |       |       |      |      |      |       |     |      |      |      | 100   | 121          |
| S18    | 2.1  | 4        | Ap       |        |        |       |       |      |       | 48.94 |       |      | 44.46 |       | 4.98 |      |      |       |     |      |      | 1.63 | 100   | 122          |
| S18    | 2.1  | 5        | Ab       | 69.48  |        | 18.72 |       |      |       | 0.17  | 11.62 |      |       |       |      |      |      |       |     |      |      |      | 100   | 121          |
| S18    | 2.1  | 6        | Ms + Chl | 56.29  |        | 20.47 | 11.08 |      | 7.97  | 0.89  | 0.60  | 2.71 |       |       |      |      |      |       |     |      |      |      | 100   | 83           |
| S18    | 2.1  | 7        | "Mag" +  | 4.90   |        |       | 95.10 |      |       |       |       |      |       |       |      |      |      |       |     |      |      |      | 100   | 83           |
| S18    | 2.1  | 8        | Qz       | 100.00 |        |       |       |      |       |       |       |      |       |       |      |      |      |       |     |      |      |      | 100   | 122          |
| S18    | 2.2  | 1        | Py +     | 11.05  |        | 4.23  | 61.52 |      | 4.17  | 0.84  | 0.61  |      | 0.86  | 13.50 |      |      |      |       |     |      |      | 3.22 | 100   | 95           |
| S18    | 2.2  | 2        | Qz       | 99.79  |        |       | 0.21  |      |       |       |       |      |       |       |      |      |      |       |     |      |      |      | 100   | 124          |
| S18    | 2.2  | 3        | Feohy +  | 7.15   |        | 4.77  | 80.09 | 0.45 |       | 1.13  |       |      | 1.97  |       |      |      |      |       |     |      |      | 4.44 | 100   | 79           |
| S18    | 2.2  | 4        | Qz       | 98.18  | 1.29   |       | 0.32  |      |       |       |       | 0.20 |       |       |      |      |      |       |     |      |      |      | 100   | 120          |
| S18    | 2.2  | 5        | TiO2 +   | 27.78  | 71.70  |       | 0.52  |      |       |       |       |      |       |       |      |      |      |       |     |      |      |      | 100   | 111          |
| S18    | 2.2  | 6        | Py +     | 3.76   |        | 1.44  | 44.77 |      | 0.47  | 0.64  | 0.60  |      |       | 41.91 |      |      |      |       |     |      |      | 6.42 | 100   | 130          |
| S18    | 2.2  | 7        | Chl +    | 40.78  |        | 18.86 | 27.02 |      | 11.54 |       | 1.29  | 0.51 |       |       |      |      |      |       |     |      |      |      | 100   | 96           |
| S18    | 3    | 1        | Ep       | 40.22  |        | 25.26 | 9.47  |      | 0.42  | 21.64 |       |      |       |       |      |      |      |       |     |      |      |      | 97    | 111          |
| S18    | 3    | 2        | Feohy    | 0.86   | 4.04   | 5.39  | 86.73 | 1.28 | 1.70  |       |       |      |       |       |      |      |      |       |     |      |      |      | 100   | 96           |
| S18    | 3    | 3        | Chr      |        |        | 21.40 | 16.63 |      | 13.14 |       |       |      |       |       |      |      |      | 48.82 |     |      |      |      | 100   | 112          |
| S18    | 3    | 4        | Ep       | 41.28  |        | 27.05 | 1.91  |      | 3.85  | 22.90 |       |      |       |       |      |      |      |       |     |      |      |      | 97    | 109          |
| S18    | 3    | 5        | Grt      | 39.69  |        | 20.96 | 28.77 | 5.66 | 2.99  | 1.93  |       |      |       |       |      |      |      |       |     |      |      |      | 100   | 115          |
| S18    | 3    | 6        | Feohy +  | 6.60   | 3.05   | 3.16  | 85.46 | 0.51 |       | 0.30  | 0.55  | 0.36 |       |       |      |      |      |       |     |      |      |      | 100   | 91           |
| S18    | 3    | 7        | Qz       | 100.00 |        |       |       |      |       |       |       |      |       |       |      |      |      |       |     |      |      |      | 100   | 120          |
| S18    | 3    | 8        | Grt      | 39.79  |        | 21.09 | 29.32 | 0.79 | 2.25  | 6.76  |       |      |       |       |      |      |      |       |     |      |      |      | 100   | 113          |
| S18    | 3    | 9        | Cpx      | 53.84  | 0.53   | 3.46  | 4.63  |      | 16.67 | 20.87 |       |      |       |       |      |      |      |       |     |      |      |      | 100   | 117          |
| S18    | 3    | 10       | Bt       | 33.53  | 2.51   | 16.60 | 28.48 |      | 7.00  |       | 0.37  | 7.51 |       |       |      |      |      |       |     |      |      |      | 96    | 89           |
| S18    | 3    | 11       | Ap       |        |        |       |       |      |       | 49.93 |       |      | 44.80 |       | 5.27 |      |      |       |     |      |      |      | 100   | 123          |
| S18    | 3    | 12       | Spl      |        |        | 51.38 | 13.58 |      | 18.98 |       |       |      |       |       |      |      | 0.29 | 15.76 |     |      |      |      | 100   | 116          |
| S18    | 3    | 13       | Ms       | 49.80  | 0.74   | 26.50 | 4.94  |      | 2.54  |       | 0.72  | 9.77 |       |       |      |      |      |       |     |      |      |      | 95    | 112          |
| S18    | 3    | 14       | Ep       | 40.44  |        | 24.12 | 9.93  |      |       | 22.51 |       |      |       |       |      |      |      |       |     |      |      |      | 97    | 111          |
| S18    | 3    | 15       | Chl +    | 36.00  |        | 12.61 | 17.59 |      | 17.41 | 1.16  |       |      |       |       |      | 0.24 |      |       |     |      |      |      | 85    | 94           |
| S18    | 3.1  | 1        | Chl      | 28.06  | 0.56   | 19.29 | 22.14 |      | 14.95 |       |       |      |       |       |      |      |      |       |     |      |      |      | 85    | 98           |
| S18    | 3.1  | 2        | TiO2     |        | 100.00 |       |       |      |       |       |       |      |       |       |      |      |      |       |     |      |      |      | 100   | 108          |
| S18    | 3.1  | 3        | Ms       | 50.13  | 0.71   | 31.36 | 2.75  |      | 2.59  |       | 0.28  | 7.18 |       |       |      |      |      |       |     |      |      |      | 95    | 115          |
| S18    | 4    | 1        | Grt      | 40.24  |        | 20.98 | 28.81 | 1.18 | 3.90  | 4.89  |       |      |       |       |      |      |      |       |     |      |      |      | 100   | 113          |
| S18    | 4    | 2        | Ep       | 40.43  |        | 23.77 | 9.94  |      |       | 22.86 |       |      |       |       |      |      |      |       |     |      |      |      | 97    | 110          |
| S18    | 4    | 3        | Tur      | 38.05  | 0.53   | 31.12 | 7.16  |      | 7.21  | 0.80  | 2.13  |      |       |       |      |      |      |       |     |      |      |      | 87    | 103          |
| S18    | 4    | 4        | Tur      | 36.55  | 0.70   | 31.12 | 9.22  |      | 5.95  | 1.41  | 1.89  | 0.17 |       |       |      |      |      |       |     |      |      |      | 87    | 103          |
| S18    | 4    | 5        | Chl      | 29.74  |        | 14.91 | 26.37 |      | 13.28 |       | 0.37  | 0.34 |       |       |      |      |      |       |     |      |      |      | 85    | 99           |

Table B10.1: EDS analyses of sample S18.

| Sample | Site | Position | Mineral  | SiO2   | TiO2   | Al2O3 | FeO   | MnO   | MgO   | CaO   | Na2O | K2O   | P2O5 | SO3 | F     | Cl | V2O5 | Cr2O3 | ZnO | ZrO2  | HfO2 | WO3 | Total | Actual Total |
|--------|------|----------|----------|--------|--------|-------|-------|-------|-------|-------|------|-------|------|-----|-------|----|------|-------|-----|-------|------|-----|-------|--------------|
| S18    | 4    | 6        | Chl      | 26.51  | 3.03   | 18.38 | 23.30 | 0.34  | 13.43 |       |      |       |      |     |       |    |      |       |     |       |      |     | 85    | 104          |
| S18    | 4    | 7        | Ttn      | 33.07  | 36.16  | 2.47  | 0.68  |       |       | 27.63 |      |       |      |     |       |    |      |       |     |       |      |     | 100   | 114          |
| S18    | 4    | 8        | Ttn +    | 32.90  | 26.02  | 7.91  |       |       |       | 27.39 |      |       |      |     | 5.78  |    |      |       |     |       |      |     | 100   | 119          |
| S18    | 4    | 9        | Grt      | 39.73  |        | 21.09 | 31.75 |       | 2.15  | 5.28  |      |       |      |     |       |    |      |       |     |       |      |     | 100   | 111          |
| S18    | 4    | 10       | Ep (Czo) | 42.21  |        | 33.30 | 0.63  |       |       | 23.87 |      |       |      |     |       |    |      |       |     |       |      |     | 100   | 113          |
| S18    | 4.1  | 1        | Qz       | 99.70  |        |       | 0.30  |       |       |       |      |       |      |     |       |    |      |       |     |       |      |     | 100   | 121          |
| S18    | 4.1  | 2        | Feohy +  | 8.36   |        | 12.75 | 66.03 | 0.61  |       | 1.16  | 1.22 | 0.56  | 1.79 |     |       |    |      |       |     |       | 7.52 |     | 100   | 75           |
| S18    | 4.1  | 3        | ?Plag    | 48.09  |        | 33.38 | 0.59  |       |       | 16.19 | 1.51 | 0.24  |      |     |       |    |      |       |     |       |      |     | 100   | 117          |
| S18    | 4.2  | 1        | Chl      | 28.36  | 0.26   | 20.13 | 18.04 |       | 17.93 |       | 0.29 |       |      |     |       |    |      |       |     |       |      |     | 85    | 100          |
| S18    | 4.2  | 2        | Qz       | 100.00 |        |       |       |       |       |       |      |       |      |     |       |    |      |       |     |       |      |     | 100   | 122          |
| S18    | 4.2  | 3        | TiO2     |        | 99.49  |       | 0.51  |       |       |       |      |       |      |     |       |    |      |       |     |       |      |     | 100   | 108          |
| S18    | 4.2  | 4        | Qz +     | 94.26  | 0.24   | 1.08  | 4.02  |       |       |       |      | 0.40  |      |     |       |    |      |       |     |       |      |     | 100   | 118          |
| S18    | 4.2  | 5        | Mix      | 29.76  | 1.32   | 11.46 | 51.94 |       | 2.17  |       | 0.71 | 2.64  |      |     |       |    |      |       |     |       |      |     | 100   | 105          |
| S18    | 5    | 1        | Ms       | 47.61  | 1.03   | 32.21 | 2.39  |       | 1.01  |       | 0.34 | 10.40 |      |     |       |    |      |       |     |       |      |     | 95    | 110          |
| S18    | 5    | 2        | Grt      | 40.38  |        | 21.04 | 25.00 | 4.61  | 2.07  | 6.90  |      |       |      |     |       |    |      |       |     |       |      |     | 100   | 114          |
| S18    | 5    | 3        | Grt      | 39.75  |        | 20.80 | 28.76 | 0.85  | 0.91  | 8.93  |      |       |      |     |       |    |      |       |     |       |      |     | 100   | 114          |
| S18    | 5    | 4        | Grt      | 39.52  |        | 20.81 | 34.65 | 0.42  | 2.27  | 2.32  |      |       |      |     |       |    |      |       |     |       |      |     | 100   | 114          |
| S18    | 5    | 5        | Chr      |        |        | 21.11 | 17.47 |       | 13.69 |       |      |       |      |     |       |    |      | 47.73 |     |       |      |     | 100   | 109          |
| S18    | 5    | 6        | Chr      |        |        | 24.70 | 17.43 |       | 13.76 |       |      |       |      |     |       |    |      | 44.12 |     |       |      |     | 100   | 107          |
| S18    | 5    | 7        | Chr      |        |        | 13.83 | 17.57 |       | 11.98 |       |      |       |      |     |       |    |      | 56.62 |     |       |      |     | 100   | 106          |
| S18    | 5    | 8        | Amph     | 55.53  |        | 2.43  | 9.69  |       | 17.56 | 11.80 |      |       |      |     |       |    |      |       |     |       |      |     | 97    | 115          |
| S18    | 5    | 9        | Mix      | 11.37  |        | 5.12  | 49.53 | 10.80 | 2.50  | 15.62 | 0.61 | 1.26  |      |     |       |    |      |       |     |       | 3.20 |     | 100   | 69           |
| S18    | 5    | 10       | Ttn      | 33.32  | 36.95  | 1.96  |       |       |       | 27.76 |      |       |      |     |       |    |      |       |     |       |      |     | 100   | 115          |
| S18    | 5    | 11       | Chr      |        |        | 19.15 | 18.50 |       | 11.83 |       |      |       |      |     |       |    |      | 50.51 |     |       |      |     | 100   | 113          |
| S18    | 5    | 12       | Ms       | 52.20  | 0.50   | 23.06 | 4.52  |       | 3.71  |       |      | 11.01 |      |     |       |    |      |       |     |       |      |     | 95    | 113          |
| S18    | 5    | 13       | Grt      | 39.18  |        | 20.96 | 34.44 | 0.51  | 1.93  | 2.98  |      |       |      |     |       |    |      |       |     |       |      |     | 100   | 112          |
| S18    | 5    | 14       | Amph     | 46.90  | 0.74   | 13.46 | 6.95  |       | 16.25 | 10.65 | 2.05 |       |      |     |       |    |      |       |     |       |      |     | 97    | 114          |
| S18    | 5    | 15       | Grt      | 40.25  |        | 21.11 | 30.93 | 0.85  | 3.98  | 2.89  |      |       |      |     |       |    |      |       |     |       |      |     | 100   | 117          |
| S18    | 5    | 16       | Zrn      | 30.88  | 0.69   |       |       |       |       |       |      |       |      |     |       |    |      |       |     | 68.43 |      |     | 100   | 121          |
| S18    | 5    | 17       | TiO2     |        | 100.00 |       |       |       |       |       |      |       |      |     |       |    |      |       |     |       |      |     | 100   | 107          |
| S18    | 5    | 18       | Ilm      |        | 52.53  | 0.51  | 41.65 | 3.08  | 2.23  |       |      |       |      |     |       |    |      |       |     |       |      |     | 100   | 99           |
| S18    | 5.1  | 1        | Fl       |        |        |       | 0.55  | 0.68  | 0.98  | 69.39 |      |       |      |     | 28.40 |    |      |       |     |       |      |     | 100   | 82           |
| S18    | 5.1  | 2        | Grt      | 40.06  |        | 21.39 | 30.11 | 0.60  | 5.61  | 2.23  |      |       |      |     |       |    |      |       |     |       |      |     | 100   | 116          |
| S18    | 5.1  | 3        | TiO2     | 1.35   | 97.68  |       | 0.64  |       |       | 0.34  |      |       |      |     |       |    |      |       |     |       |      |     | 100   | 106          |
| S18    | 5.1  | 4        | Qz       | 100.00 |        |       |       |       |       |       |      |       |      |     |       |    |      |       |     |       |      |     | 100   | 123          |
| S18    | 6    | 1        | Mag +    | 3.25   |        | 1.83  | 94.61 |       |       | 0.31  |      |       |      |     |       |    |      |       |     |       |      |     | 100   | 93           |



Table B10.1: EDS analyses of sample S18.

| Sample | Site | Position | Mineral | SiO2   | TiO2   | Al2O3 | FeO   | MnO   | MgO   | CaO   | Na2O | K2O   | P2O5  | SO3  | F    | Cl   | V2O5 | Cr2O3 | ZnO  | ZrO2  | HfO2 | WO3  | Total | Actual Total |
|--------|------|----------|---------|--------|--------|-------|-------|-------|-------|-------|------|-------|-------|------|------|------|------|-------|------|-------|------|------|-------|--------------|
| S18    | 6    | 2        | Chr     |        |        | 15.42 | 18.79 |       | 11.66 |       |      |       |       |      |      |      |      | 54.13 |      |       |      |      | 100   | 111          |
| S18    | 6    | 3        | Ttn     | 32.54  | 38.63  | 0.72  | 0.71  |       |       | 27.41 |      |       |       |      |      |      |      |       |      |       |      |      | 100   | 113          |
| S18    | 6    | 4        | Grt     | 40.66  |        | 21.49 | 21.49 | 0.99  | 4.38  | 11.00 |      |       |       |      |      |      |      |       |      |       |      |      | 100   | 117          |
| S18    | 6    | 5        | TiO2    |        | 99.71  |       | 0.29  |       |       |       |      |       |       |      |      |      |      |       |      |       |      |      | 100   | 109          |
| S18    | 6    | 6        | Grt     | 40.77  |        | 21.46 | 26.77 | 0.40  | 7.22  | 3.38  |      |       |       |      |      |      |      |       |      |       |      |      | 100   | 115          |
| S18    | 6    | 7        | Dol     |        |        |       |       |       | 22.25 | 31.75 |      |       |       |      |      |      |      |       |      |       |      |      | 54    | 55           |
| S18    | 6    | 8        | Dol     |        |        |       | 3.21  | 0.53  | 20.74 | 29.52 |      |       |       |      |      |      |      |       |      |       |      |      | 54    | 57           |
| S18    | 6    | 9        | Ms      | 48.68  | 0.54   | 28.91 | 4.41  |       | 1.75  |       | 0.28 | 10.44 |       |      |      |      |      |       |      |       |      |      | 95    | 109          |
| S18    | 6    | 10       | Chl     | 26.39  |        | 21.87 | 21.67 | 0.31  | 14.76 |       |      |       |       |      |      |      |      |       |      |       |      |      | 85    | 99           |
| S18    | 6    | 11       | Chl     | 26.20  |        | 21.56 | 23.32 | 0.26  | 13.67 |       |      |       |       |      |      |      |      |       |      |       |      |      | 85    | 100          |
| S18    | 6    | 12       | Ap      |        |        |       |       |       |       | 48.37 |      |       | 44.14 |      | 5.98 |      |      |       |      |       |      | 1.51 | 100   | 125          |
| S18    | 6    | 13       | Ap      |        |        |       | 0.38  |       | 0.46  | 48.66 |      |       | 44.40 | 0.64 | 2.67 | 1.20 |      |       |      |       |      | 1.60 | 100   | 120          |
| S18    | 6    | 14       | Spl     |        |        | 29.15 | 14.91 |       | 15.66 |       |      |       |       |      |      |      |      | 40.29 |      |       |      |      | 100   | 113          |
| S18    | 6    | 15       | Grt     | 40.01  |        | 21.26 | 30.25 | 0.66  | 3.24  | 4.59  |      |       |       |      |      |      |      |       |      |       |      |      | 100   | 116          |
| S18    | 6    | 16       | Grt     | 39.77  | 0.40   | 21.01 | 24.58 | 4.80  | 0.74  | 8.70  |      |       |       |      |      |      |      |       |      |       |      |      | 100   | 117          |
| S18    | 6    | 17       | Chr     |        |        | 9.10  | 25.29 |       | 7.24  |       |      |       |       |      |      |      |      | 57.84 | 0.53 |       |      |      | 100   | 112          |
| S18    | 6    | 18       | Chl     | 27.59  |        | 19.70 | 22.52 |       | 15.19 |       |      |       |       |      |      |      |      |       |      |       |      |      | 85    | 100          |
| S18    | 6    | 19       | Dol     |        |        |       |       |       | 22.61 | 31.39 |      |       |       |      |      |      |      |       |      |       |      |      | 54    | 60           |
| S18    | 6    | 20       | Ilm     |        | 59.41  |       | 37.52 | 1.43  | 1.64  |       |      |       |       |      |      |      |      |       |      |       |      |      | 100   | 102          |
| S18    | 6.1  | 1        | Qz      | 99.44  | 0.56   |       |       |       |       |       |      |       |       |      |      |      |      |       |      |       |      |      | 100   | 125          |
| S18    | 6.1  | 2        | TiO2    | 0.84   | 98.12  |       | 0.62  |       | 0.41  |       |      |       |       |      |      |      |      |       |      |       |      |      | 100   | 109          |
| S18    | 6.1  | 3        | Zrn +   | 25.00  | 26.34  | 0.91  | 0.63  |       |       | 0.47  |      |       |       |      |      |      |      |       |      | 46.65 |      |      | 100   | 110          |
| S18    | 7    | 1        | Chr     |        |        | 9.96  | 21.49 |       | 10.72 |       |      |       |       |      |      |      |      | 57.83 |      |       |      |      | 100   | 111          |
| S18    | 7    | 2        | Grt     | 39.75  |        | 20.83 | 22.87 | 8.90  | 1.08  | 6.57  |      |       |       |      |      |      |      |       |      |       |      |      | 100   | 115          |
| S18    | 7    | 3        | Spl     |        |        | 34.96 | 14.06 |       | 16.02 |       |      |       |       |      |      |      |      | 34.95 |      |       |      |      | 100   | 111          |
| S18    | 7    | 4        | Ap      |        |        |       |       |       |       | 49.57 |      |       | 44.61 |      | 5.82 |      |      |       |      |       |      |      | 100   | 121          |
| S18    | 7    | 5        | TiO2    |        | 100.00 |       |       |       |       |       |      |       |       |      |      |      |      |       |      |       |      |      | 100   | 106          |
| S18    | 7    | 6        | "Ilm"   |        | 77.78  |       | 21.93 |       |       | 0.28  |      |       |       |      |      |      |      |       |      |       |      |      | 100   | 95           |
| S18    | 7    | 7        | Zrn +   | 36.17  |        | 12.67 | 18.88 | 1.79  | 2.04  | 1.35  |      |       |       |      |      |      |      |       |      | 27.09 |      |      | 100   | 114          |
| S18    | 7    | 8        | Qz      | 100.00 |        |       |       |       |       |       |      |       |       |      |      |      |      |       |      |       |      |      | 100   | 121          |
| S18    | 7    | 9        | Ap      |        |        |       |       |       |       | 47.20 | 0.70 |       | 43.82 |      | 6.57 |      |      |       |      |       |      | 1.72 | 100   | 121          |
| S18    | 7    | 10       | Chr     |        |        | 18.03 | 20.37 |       | 9.92  |       |      |       |       |      |      |      | 0.53 | 50.68 | 0.46 |       |      |      | 100   | 111          |
| S18    | 7    | 11       | Chr     |        |        | 13.92 | 23.94 |       | 8.85  |       |      |       |       |      |      |      |      | 53.29 |      |       |      |      | 100   | 109          |
| S18    | 7    | 12       | TiO2    |        | 99.40  |       | 0.34  |       |       | 0.26  |      |       |       |      |      |      |      |       |      |       |      |      | 100   | 110          |
| S18    | 7    | 13       | Chl     | 26.58  |        | 20.91 | 22.36 | 0.26  | 14.89 |       |      |       |       |      |      |      |      |       |      |       |      |      | 85    | 100          |
| S18    | 8    | 1        | Grt     | 39.71  |        | 20.94 | 19.59 | 12.22 | 2.64  | 4.89  |      |       |       |      |      |      |      |       |      |       |      |      | 100   | 115          |

Table B10.1: EDS analyses of sample S18.

| Sample | Site | Position | Mineral    | SiO2   | TiO2   | Al2O3 | FeO   | MnO  | MgO   | CaO   | Na2O  | K2O   | P2O5  | SO3   | F     | Cl | V2O5 | Cr2O3 | ZnO   | ZrO2  | HfO2 | WO3  | Total | Actual Total |
|--------|------|----------|------------|--------|--------|-------|-------|------|-------|-------|-------|-------|-------|-------|-------|----|------|-------|-------|-------|------|------|-------|--------------|
| S18    | 8    | 2        | Chr        |        |        | 13.81 | 20.09 |      | 11.02 |       |       |       |       |       |       |    |      | 55.08 |       |       |      |      | 100   | 110          |
| S18    | 8    | 3        | Chr        |        |        | 22.42 | 16.18 |      | 13.69 |       |       |       |       |       |       |    |      | 47.71 |       |       |      |      | 100   | 112          |
| S18    | 8    | 4        | Chr        |        |        | 18.91 | 21.30 |      | 12.40 |       |       |       |       |       |       |    |      | 47.39 |       |       |      |      | 100   | 113          |
| S18    | 8    | 5        | Ap         |        |        |       | 0.28  |      |       | 48.11 |       |       | 44.51 |       | 5.56  |    |      |       |       |       |      | 1.54 | 100   | 127          |
| S18    | 8    | 6        | Grt        | 39.58  |        | 20.95 | 33.07 | 0.49 | 1.99  | 3.92  |       |       |       |       |       |    |      |       |       |       |      |      | 100   | 115          |
| S18    | 8    | 7        | Chl        | 25.76  |        | 20.30 | 26.36 | 0.26 | 12.00 |       | 0.31  |       |       |       |       |    |      |       |       |       |      |      | 85    | 101          |
| S18    | 8    | 8        | Chl        | 26.80  |        | 21.19 | 22.97 |      | 14.04 |       |       |       |       |       |       |    |      |       |       |       |      |      | 85    | 104          |
| S18    | 8    | 9        | Grt        | 39.99  |        | 21.04 | 27.73 | 1.59 | 2.13  | 7.51  |       |       |       |       |       |    |      |       |       |       |      |      | 100   | 114          |
| S18    | 8    | 10       | Cpx        | 52.22  | 0.98   | 4.38  | 6.38  |      | 15.07 | 20.42 |       |       |       |       |       |    |      | 0.55  |       |       |      |      | 100   | 116          |
| S18    | 8    | 11       | Grt        | 39.29  |        | 21.09 | 33.64 | 1.26 | 3.78  | 0.94  |       |       |       |       |       |    |      |       |       |       |      |      | 100   | 113          |
| S18    | 8    | 12       | Chl        | 29.72  |        | 16.80 | 23.94 | 0.48 | 13.22 | 0.45  | 0.39  |       |       |       |       |    |      |       |       |       |      |      | 85    | 100          |
| S18    | 8    | 13       | Ep         | 39.84  |        | 24.11 | 10.73 |      |       | 22.32 |       |       |       |       |       |    |      |       |       |       |      |      | 97    | 107          |
| S18    | 8    | 14       | TiO2       |        | 100.00 |       |       |      |       |       |       |       |       |       |       |    |      |       |       |       |      |      | 100   | 110          |
| S18    | 8    | 15       | Chl        | 28.75  |        | 19.28 | 21.56 | 0.34 | 15.08 |       |       |       |       |       |       |    |      |       |       |       |      |      | 85    | 104          |
| S18    | 8    | 16       | Chl        | 25.74  |        | 21.90 | 22.25 | 0.27 | 14.83 |       |       |       |       |       |       |    |      |       |       |       |      |      | 85    | 100          |
| S18    | 8    | 17       | Chl        | 26.07  |        | 20.94 | 24.86 | 0.31 | 12.83 |       |       |       |       |       |       |    |      |       |       |       |      |      | 85    | 99           |
| S18    | 8    | 18       | Bt         | 39.60  | 3.76   | 17.31 | 18.52 |      | 9.30  | 0.96  |       | 6.56  |       |       |       |    |      |       |       |       |      |      | 96    | 99           |
| S18    | 8.1  | 1        | Sp         | 0.20   |        |       | 0.46  |      |       |       |       |       |       | 50.14 |       |    |      |       | 49.20 |       |      |      | 100   | 181          |
| S18    | 8.1  | 2        | Ep         | 41.63  |        | 27.31 | 2.57  |      | 2.33  | 23.17 |       |       |       |       |       |    |      |       |       |       |      |      | 97    | 108          |
| S18    | 8.1  | 3        | Ab         | 67.68  |        | 19.98 |       |      |       | 1.44  | 10.90 |       |       |       |       |    |      |       |       |       |      |      | 100   | 121          |
| S18    | 9    | 1        | Chl        | 25.24  |        | 21.95 | 28.46 |      | 9.00  |       | 0.35  |       |       |       |       |    |      |       |       |       |      |      | 85    | 98           |
| S18    | 9    | 2        | ?          | 40.13  |        | 21.03 | 22.39 | 3.22 | 1.28  | 11.95 |       |       |       |       |       |    |      |       |       |       |      |      | 100   | 114          |
| S18    | 9    | 3        | TiO2       |        | 99.64  |       | 0.36  |      |       |       |       |       |       |       |       |    |      |       |       |       |      |      | 100   | 109          |
| S18    | 9    | 4        | Chl        | 29.40  | 1.45   | 18.73 | 24.40 |      | 10.84 |       |       | 0.20  |       |       |       |    |      |       |       |       |      |      | 85    | 101          |
| S18    | 9    | 5        | Grt        | 40.44  |        | 21.37 | 24.57 | 0.50 | 5.20  | 7.92  |       |       |       |       |       |    |      |       |       |       |      |      | 100   | 118          |
| S18    | 9    | 6        | Ms         | 48.46  | 0.47   | 31.36 | 2.57  |      | 1.04  |       | 0.45  | 10.66 |       |       |       |    |      |       |       |       |      |      | 95    | 113          |
| S18    | 9    | 7        | Ms         | 50.52  | 0.47   | 24.70 | 4.74  |      | 3.69  |       |       | 10.89 |       |       |       |    |      |       |       |       |      |      | 95    | 105          |
| S18    | 9    | 8        | Fl         | 0.45   |        |       |       |      | 0.38  | 55.51 |       |       |       |       | 43.66 |    |      |       |       |       |      |      | 100   | 105          |
| S18    | 9    | 9        | Zrn        | 30.93  |        |       |       |      |       |       |       |       |       |       |       |    |      |       |       | 67.68 | 1.39 |      | 100   | 125          |
| S18    | 9    | 10       | Mag        |        |        |       | 98.77 | 1.23 |       |       |       |       |       |       |       |    |      |       |       |       |      |      | 100   | 103          |
| S18    | 9    | 11       | Ep         | 39.78  |        | 24.00 | 10.69 | 0.34 |       | 22.19 |       |       |       |       |       |    |      |       |       |       |      |      | 97    | 115          |
| S18    | 9    | 12       | Chl        | 26.85  |        | 21.84 | 20.89 |      | 15.42 |       |       |       |       |       |       |    |      |       |       |       |      |      | 85    | 107          |
| S18    | 9    | 13       | Grt        | 39.98  |        | 21.23 | 30.00 | 1.79 | 4.75  | 2.24  |       |       |       |       |       |    |      |       |       |       |      |      | 100   | 114          |
| S18    | 9.1  | 1        | Qz         | 100.00 |        |       |       |      |       |       |       |       |       |       |       |    |      |       |       |       |      |      | 100   | 123          |
| S18    | 9.1  | 2        | TiO2       | 0.56   | 99.07  |       | 0.36  |      |       |       |       |       |       |       |       |    |      |       |       |       |      |      | 100   | 110          |
| S18    | 9.1  | 3        | TiO2 + Chl | 15.63  | 50.66  | 11.60 | 17.96 |      | 3.74  | 0.41  |       |       |       |       |       |    |      |       |       |       |      |      | 100   | 86           |

Table B10.1: EDS analyses of sample S18.

| Sample | Site                                          | Position | Mineral | SiO2  | TiO2 | Al2O3 | FeO   | MnO  | MgO  | CaO  | Na2O | K2O  | P2O5 | SO3 | F | Cl | V2O5 | Cr2O3 | ZnO | ZrO2 | HfO2 | WO3  | Total | Actual Total |
|--------|-----------------------------------------------|----------|---------|-------|------|-------|-------|------|------|------|------|------|------|-----|---|----|------|-------|-----|------|------|------|-------|--------------|
| S18    | 9.1                                           | 4        | Ms      | 49.83 | 0.64 | 31.66 | 3.41  |      | 1.31 |      | 0.45 | 7.70 |      |     |   |    |      |       |     |      |      |      | 95    | 107          |
| S18    | 9.1                                           | 5        | "Mag" + | 4.97  |      |       | 93.70 |      | 0.94 | 0.39 |      |      |      |     |   |    |      |       |     |      |      |      | 100   | 80           |
| S18    | 9.1                                           | 6        | Feohy + | 9.25  |      | 3.37  | 75.46 | 0.41 |      | 1.17 | 0.98 |      | 0.92 |     |   |    |      |       |     |      |      | 8.45 | 100   | 83           |
|        |                                               |          |         |       |      |       |       |      |      |      |      |      |      |     |   |    |      |       |     |      |      |      |       |              |
|        |                                               |          |         |       |      |       |       |      |      |      |      |      |      |     |   |    |      |       |     |      |      |      |       |              |
|        | Notes                                         |          |         |       |      |       |       |      |      |      |      |      |      |     |   |    |      |       |     |      |      |      |       |              |
|        | " " = indicates that mineral is altered       |          |         |       |      |       |       |      |      |      |      |      |      |     |   |    |      |       |     |      |      |      |       |              |
|        | + = indicates that other minerals are present |          |         |       |      |       |       |      |      |      |      |      |      |     |   |    |      |       |     |      |      |      |       |              |
|        |                                               |          |         |       |      |       |       |      |      |      |      |      |      |     |   |    |      |       |     |      |      |      |       |              |
|        |                                               |          |         |       |      |       |       |      |      |      |      |      |      |     |   |    |      |       |     |      |      |      |       |              |

Table B10.2: EDS analyses of sample S18

| Sample | Site | Position | Mineral      | SiO2   | TiO2  | Al2O3 | FeO   | MnO   | MgO   | CaO   | Na2O  | K2O   | P2O5  | SO3  | F    | Cl | V2O5  | Cr2O3 | NiO | CuO  | ZnO   | ZrO2 | Ag2O | La2O3 | Ce2O3 | Nd2O3 | HfO2 | WO3 | Total | Actual Total |
|--------|------|----------|--------------|--------|-------|-------|-------|-------|-------|-------|-------|-------|-------|------|------|----|-------|-------|-----|------|-------|------|------|-------|-------|-------|------|-----|-------|--------------|
| S18    | 10   | 1        | Chr          |        |       | 17.19 | 17.46 |       | 12.21 |       |       |       |       |      |      |    | 0.33  | 52.82 |     |      |       |      |      |       |       |       |      |     | 100   | 110          |
| S18    | 10   | 2        | Grt          | 39.72  |       | 21.01 |       | 19.87 | 4.52  | 2.57  |       |       |       |      |      |    |       |       |     |      |       |      |      |       |       |       |      |     | 100   | 116          |
| S18    | 10   | 3        | Chl          | 26.78  |       | 20.54 | 22.31 |       | 15.37 |       |       |       |       |      |      |    |       |       |     |      |       |      |      |       |       |       |      |     | 85    | 99           |
| S18    | 10   | 4        | Ms           | 50.12  | 0.31  | 23.80 | 7.21  |       | 2.59  |       |       | 10.96 |       |      |      |    |       |       |     |      |       |      |      |       |       |       |      |     | 95    | 106          |
| S18    | 10   | 5        | Ms           | 48.31  | 0.76  | 32.67 | 1.54  |       | 1.17  |       | 0.84  | 9.72  |       |      |      |    |       |       |     |      |       |      |      |       |       |       |      |     | 95    | 109          |
| S18    | 10   | 6        | Tur          | 38.01  | 0.97  | 33.79 | 6.14  |       | 5.66  | 0.39  | 2.04  |       |       |      |      |    |       |       |     |      |       |      |      |       |       |       |      |     | 87    | 99           |
| S18    | 10   | 7        | Dol          |        |       |       |       |       | 22.39 | 31.61 |       |       |       |      |      |    |       |       |     |      |       |      |      |       |       |       |      |     | 54    | 56           |
| S18    | 10   | 8        | Chl          | 26.72  |       | 21.11 | 19.67 | 0.38  | 17.12 |       |       |       |       |      |      |    |       |       |     |      |       |      |      |       |       |       |      |     | 85    | 97           |
| S18    | 10   | 9        | Grt          | 39.36  |       | 20.97 | 33.57 | 0.75  | 3.89  | 1.45  |       |       |       |      |      |    |       |       |     |      |       |      |      |       |       |       |      |     | 100   | 113          |
| S18    | 10   | 10       | Zrn          | 31.23  |       |       |       |       |       |       |       |       |       |      |      |    |       |       |     |      | 68.77 |      |      |       |       |       |      |     | 100   | 118          |
| S18    | 10   | 11       | Amph         | 44.85  | 2.83  | 10.26 | 10.68 | 0.25  | 14.70 | 10.55 | 2.46  | 0.41  |       |      |      |    |       |       |     |      |       |      |      |       |       |       |      |     | 97    | 115          |
| S18    | 10   | 12       | Grt          | 39.54  |       | 21.14 | 29.66 | 0.81  | 1.44  | 7.42  |       |       |       |      |      |    |       |       |     |      |       |      |      |       |       |       |      |     | 100   | 116          |
| S18    | 10   | 13       | Chl          | 28.46  |       | 19.85 | 25.21 | 0.27  | 9.91  | 0.30  | 0.52  |       |       |      |      |    |       | 0.48  |     |      |       |      |      |       |       |       |      |     | 85    | 100          |
| S18    | 10   | 14       | Pg           | 46.21  |       | 38.82 | 0.48  |       |       | 0.51  | 6.92  | 0.87  |       |      | 1.19 |    |       |       |     |      |       |      |      |       |       |       |      |     | 95    | 111          |
| S18    | 10   | 15       | Ms           | 47.50  | 0.58  | 32.13 | 2.87  |       | 1.10  |       | 1.04  | 9.79  |       |      |      |    |       |       |     |      |       |      |      |       |       |       |      |     | 95    | 111          |
| S18    | 10   | 16       | Dol          |        |       |       |       |       | 22.47 | 31.53 |       |       |       |      |      |    |       |       |     |      |       |      |      |       |       |       |      |     | 54    | 55           |
| S18    | 10   | 17       | Grt          | 39.56  |       | 20.80 | 29.63 | 1.38  | 2.32  | 6.31  |       |       |       |      |      |    |       |       |     |      |       |      |      |       |       |       |      |     | 100   | 112          |
| S18    | 10   | 18       | Dol          |        |       |       |       |       | 22.66 | 31.34 |       |       |       |      |      |    |       |       |     |      |       |      |      |       |       |       |      |     | 54    | 56           |
| S18    | 10.1 | 1        | Ep           | 40.10  |       | 22.78 | 11.31 |       |       | 22.20 |       |       |       |      |      |    | 0.61  |       |     |      |       |      |      |       |       |       |      |     | 97    | 111          |
| S18    | 10.1 | 2        | Ab           | 67.98  |       | 19.12 | 0.42  |       |       | 1.21  | 11.27 |       |       |      |      |    |       |       |     |      |       |      |      |       |       |       |      |     | 100   | 119          |
| S18    | 10.1 | 3        | "Mag" +      | 4.70   |       | 0.80  | 92.98 | 0.95  |       | 0.56  |       |       |       |      |      |    |       |       |     |      |       |      |      |       |       |       |      |     | 100   | 75           |
| S18    | 10.1 | 4        | Kln +        | 51.41  |       | 35.20 | 11.78 |       | 0.35  | 0.41  | 0.57  | 0.28  |       |      |      |    |       |       |     |      |       |      |      |       |       |       |      |     | 100   | 93           |
| S18    | 10.1 | 5        | Ap +         | 1.89   |       | 0.97  | 0.56  |       |       | 46.85 |       | 0.21  | 41.42 |      | 5.98 |    |       |       |     |      |       |      |      |       |       |       | 2.12 |     | 100   | 106          |
| S18    | 10.1 | 6        | Qz +Chl + Ap | 89.33  |       | 2.08  | 2.94  |       | 0.41  | 2.13  |       | 0.65  | 2.45  |      |      |    |       |       |     |      |       |      |      |       |       |       |      |     | 100   | 110          |
| S18    | 11   | 1        | Pg           | 47.60  |       | 37.66 | 0.35  |       |       |       | 7.53  | 0.64  |       |      | 1.23 |    |       |       |     |      |       |      |      |       |       |       |      |     | 95    | 112          |
| S18    | 11   | 2        | TiO2         | 0.45   | 99.20 |       | 0.36  |       |       |       |       |       |       |      |      |    |       |       |     |      |       |      |      |       |       |       |      |     | 100   | 110          |
| S18    | 11   | 3        | Grt          | 39.50  |       | 21.11 | 31.82 | 1.82  | 3.53  | 2.22  |       |       |       |      |      |    |       |       |     |      |       |      |      |       |       |       |      |     | 100   | 114          |
| S18    | 11   | 4        | Ttn          | 32.96  | 37.35 | 1.47  | 0.30  |       |       | 27.93 |       |       |       |      |      |    |       |       |     |      |       |      |      |       |       |       |      |     | 100   | 111          |
| S18    | 11   | 5        | Qz           | 100.00 |       |       |       |       |       |       |       |       |       |      |      |    |       |       |     |      |       |      |      |       |       |       |      |     | 100   | 123          |
| S18    | 11   | 6        | Chr +        | 5.36   | 0.75  | 4.36  | 33.51 | 1.44  | 6.25  |       |       |       |       |      |      |    | 47.80 |       |     | 0.54 |       |      |      |       | 0.83  |       | 1.92 |     | 100   | 104          |
| S18    | 11   | 7        | Ap           |        |       |       | 0.62  |       |       | 46.78 | 0.60  |       | 40.32 | 1.22 | 7.71 |    |       | 0.30  |     |      |       |      |      |       |       |       |      |     | 97    | 103          |
| S18    | 11   | 8        | Ep           | 39.41  | 0.58  | 20.14 | 11.73 | 0.24  | 3.98  | 20.62 |       |       |       |      |      |    |       |       |     |      |       |      |      |       |       |       |      |     | 100   | 115          |
| S18    | 11   | 9        | Grt          | 39.25  |       | 20.78 | 32.67 | 0.50  | 2.08  | 4.72  |       |       |       |      |      |    |       |       |     |      |       |      |      |       |       |       |      |     | 100   | 115          |
| S18    | 11   | 10       | TiO2         |        | 99.66 |       | 0.34  |       |       |       |       |       |       |      |      |    |       |       |     |      |       |      |      |       |       |       |      |     | 100   | 106          |
| S18    | 11   | 11       | Ep           | 40.15  |       | 24.30 | 9.83  |       |       | 22.72 |       |       |       |      |      |    |       |       |     |      |       |      |      |       |       |       |      |     | 97    | 109          |
| S18    | 11   | 12       | Qz           | 99.80  |       |       | 0.20  |       |       |       |       |       |       |      |      |    |       |       |     |      |       |      |      |       |       |       |      |     | 100   | 119          |
| S18    | 11   | 13       | TiO2 +       | 5.89   | 84.95 | 3.36  | 3.28  |       | 2.16  | 0.35  |       |       |       |      |      |    |       |       |     |      |       |      |      |       |       |       |      |     | 100   | 107          |
| S18    | 11   | 14       | Grt          | 39.66  |       | 21.00 | 30.95 | 1.61  | 3.91  | 2.86  |       |       |       |      |      |    |       |       |     |      |       |      |      |       |       |       |      |     | 100   | 113          |
| S18    | 11   | 15       | Chr          |        |       | 14.83 | 22.53 |       | 10.37 |       |       |       |       |      |      |    | 52.27 |       |     |      |       |      |      |       |       |       |      |     | 100   | 111          |
| S18    | 11   | 16       | Ap           |        |       |       |       |       |       | 49.92 |       |       | 44.65 |      | 5.43 |    |       |       |     |      |       |      |      |       |       |       |      |     | 100   | 123          |
| S18    | 11   | 17       | Ttn          | 32.56  | 26.62 | 8.06  |       |       |       | 27.17 |       |       |       |      | 5.59 |    |       |       |     |      |       |      |      |       |       |       |      |     | 100   | 117          |
| S18    | 11.1 | 1        | Grt          | 39.44  |       | 20.84 | 31.34 | 0.51  | 1.61  | 6.27  |       |       |       |      |      |    |       |       |     |      |       |      |      |       |       |       |      |     | 100   | 115          |
| S18    | 11.1 | 2        | Chl          | 29.35  |       | 16.28 | 25.22 | 0.41  | 12.46 | 0.41  | 0.88  |       |       |      |      |    |       |       |     |      |       |      |      |       |       |       |      |     | 85    | 96           |
| S18    | 11.1 | 3        | Qz           | 100.00 |       |       |       |       |       |       |       |       |       |      |      |    |       |       |     |      |       |      |      |       |       |       |      |     | 100   | 122          |
| S18    | 12   | 1        | Tur          | 39.01  | 0.54  | 31.24 | 4.31  |       | 8.90  | 0.54  | 2.46  |       |       |      |      |    |       |       |     |      |       |      |      |       |       |       |      |     | 87    | 100          |
| S18    | 12   | 2        | Chr          |        |       | 23.38 | 17.50 |       | 13.46 |       |       |       |       |      |      |    | 0.35  | 45.31 |     |      |       |      |      |       |       |       |      |     | 100   | 110          |
| S18    | 12   | 3        | Chl          | 27.65  |       | 19.25 | 20.78 | 0.65  | 16.67 |       |       |       |       |      |      |    |       |       |     |      |       |      |      |       |       |       |      |     | 85    | 95           |
| S18    | 12   | 4        | Chl          | 26.47  |       | 20.22 | 25.48 |       | 12.83 |       |       |       |       |      |      |    |       |       |     |      |       |      |      |       |       |       |      |     | 85    | 94           |

Table B10.2: EDS analyses of sample S18

| Sample | Site | Position | Mineral | SiO2  | TiO2  | Al2O3 | FeO   | MnO  | MgO   | CaO   | Na2O  | K2O   | P2O5  | SO3   | F     | Cl | V2O5 | Cr2O3 | NiO | CuO | ZnO | ZrO2  | Ag2O | La2O3 | Ce2O3 | Nd2O3 | HfO2 | WO3 | Total | Actual Total |
|--------|------|----------|---------|-------|-------|-------|-------|------|-------|-------|-------|-------|-------|-------|-------|----|------|-------|-----|-----|-----|-------|------|-------|-------|-------|------|-----|-------|--------------|
| S18    | 12   | 5        | Grt     | 39.19 |       | 20.70 | 30.19 | 6.00 | 2.63  | 1.30  |       |       |       |       |       |    |      |       |     |     |     |       |      |       |       |       |      |     | 100   | 113          |
| S18    | 12   | 6        | Grt     | 39.83 |       | 20.96 |       |      | 2.31  | 7.47  |       |       |       |       |       |    |      |       |     |     |     |       |      |       |       |       |      |     | 100   | 113          |
| S18    | 12   | 7        | Spl     |       |       | 32.50 | 16.21 |      | 11.85 |       |       |       |       |       |       |    |      | 39.44 |     |     |     |       |      |       |       |       |      |     | 100   | 108          |
| S18    | 12   | 8        | Amph    | 48.14 | 1.18  | 7.28  | 14.54 | 0.45 | 12.56 | 11.16 | 0.98  | 0.72  |       |       |       |    |      |       |     |     |     |       |      |       |       |       |      |     | 97    | 113          |
| S18    | 12   | 9        | Fl      |       |       |       |       |      |       | 53.37 |       |       |       |       | 46.63 |    |      |       |     |     |     |       |      |       |       |       |      |     | 100   | 93           |
| S18    | 12   | 10       | Ep      | 39.80 |       | 22.76 | 12.19 |      |       | 22.25 |       |       |       |       |       |    |      |       |     |     |     |       |      |       |       |       |      |     | 97    | 106          |
| S18    | 12   | 11       | Chl     | 28.79 |       | 17.91 | 22.71 | 0.41 | 15.19 |       |       |       |       |       |       |    |      |       |     |     |     |       |      |       |       |       |      |     | 85    | 97           |
| S18    | 12   | 12       | Ms      | 48.28 | 0.30  | 32.22 | 3.09  |      | 0.58  |       | 0.36  | 10.17 |       |       |       |    |      |       |     |     |     |       |      |       |       |       |      |     | 95    | 104          |
| S18    | 12   | 13       | Grt     | 40.83 |       | 14.16 | 10.85 | 0.61 |       | 33.55 |       |       |       |       |       |    |      |       |     |     |     |       |      |       |       |       |      |     | 100   | 111          |
| S18    | 12   | 14       | Chr     |       |       | 26.08 | 16.67 |      | 14.43 |       |       |       |       |       |       |    |      | 42.82 |     |     |     |       |      |       |       |       |      |     | 100   | 113          |
| S18    | 12.1 | 1        | Ttn     | 35.45 | 32.38 | 4.50  | 0.80  |      |       | 26.37 | 0.50  |       |       |       |       |    |      |       |     |     |     |       |      |       |       |       |      |     | 100   | 108          |
| S18    | 12.1 | 2        | Ep      | 40.99 |       | 25.85 | 5.94  |      | 1.38  | 22.84 |       |       |       |       |       |    |      |       |     |     |     |       |      |       |       |       |      |     | 97    | 105          |
| S18    | 12.1 | 3        | Ab      | 69.40 |       | 19.04 |       |      |       | 0.24  | 11.32 |       |       |       |       |    |      |       |     |     |     |       |      |       |       |       |      |     | 100   | 120          |
| S18    | 13   | 1        | Ms      | 50.52 | 0.40  | 25.55 | 5.05  |      | 2.83  |       |       | 10.66 |       |       |       |    |      |       |     |     |     |       |      |       |       |       |      |     | 95    | 107          |
| S18    | 13   | 2        | Ms      | 51.39 | 0.25  | 23.04 | 6.47  |      | 3.00  |       |       | 10.86 |       |       |       |    |      |       |     |     |     |       |      |       |       |       |      |     | 95    | 107          |
| S18    | 13   | 3        | Chr     |       |       | 20.56 | 19.16 |      | 11.86 |       |       |       |       |       |       |    | 0.39 | 48.04 |     |     |     |       |      |       |       |       |      |     | 100   | 109          |
| S18    | 13   | 4        | Chr     |       |       | 17.95 | 18.19 |      | 12.22 |       |       |       |       |       |       |    | 0.36 | 51.27 |     |     |     |       |      |       |       |       |      |     | 100   | 107          |
| S18    | 13   | 5        | Ap +    | 15.35 |       | 7.44  | 9.76  | 0.34 | 2.07  | 30.94 |       |       | 30.68 |       | 3.43  |    |      |       |     |     |     |       |      |       |       |       |      |     | 100   | 117          |
| S18    | 13   | 6        | Zrn     | 31.59 |       |       |       |      |       |       |       |       |       |       |       |    |      |       |     |     |     | 68.41 |      |       |       |       |      |     | 100   | 121          |
| S18    | 13   | 7        | Chr     |       |       | 25.41 | 17.27 |      | 14.10 |       |       |       |       |       |       |    |      | 43.22 |     |     |     |       |      |       |       |       |      |     | 100   | 112          |
| S18    | 13   | 8        | Grt     | 39.70 |       | 20.85 | 32.24 | 0.62 | 4.23  | 2.37  |       |       |       |       |       |    |      |       |     |     |     |       |      |       |       |       |      |     | 100   | 115          |
| S18    | 13   | 9        | Chl     | 32.78 |       | 16.12 | 19.32 |      | 15.84 | 0.67  |       | 0.26  |       |       |       |    |      |       |     |     |     |       |      |       |       |       |      |     | 85    | 93           |
| S18    | 13   | 10       | Zrn     | 31.32 |       |       |       |      |       |       |       |       |       |       |       |    |      |       |     |     |     | 68.68 |      |       |       |       |      |     | 100   | 119          |
| S18    | 13   | 11       | Amph    | 49.30 | 1.60  | 6.13  | 12.56 | 0.26 | 13.52 | 11.94 | 1.28  | 0.41  |       |       |       |    |      |       |     |     |     |       |      |       |       |       |      |     | 97    | 111          |
| S18    | 13   | 12       | Chl     | 26.85 |       | 19.41 | 24.04 |      | 14.27 |       | 0.43  |       |       |       |       |    |      |       |     |     |     |       |      |       |       |       |      |     | 85    | 98           |
| S18    | 13   | 13       | Ep      | 40.44 |       | 26.09 | 7.64  |      |       | 22.83 |       |       |       |       |       |    |      |       |     |     |     |       |      |       |       |       |      |     | 97    | 109          |
| S18    | 13   | 14       | Feohy   |       | 12.30 | 0.73  | 86.97 |      |       |       |       |       |       |       |       |    |      |       |     |     |     |       |      |       |       |       |      |     | 100   | 96           |
| S18    | 13   | 15       | Chr     |       | 0.39  | 7.05  | 22.95 |      | 7.18  |       |       |       |       |       |       |    | 0.44 | 61.99 |     |     |     |       |      |       |       |       |      |     | 100   | 109          |
| S18    | 13   | 16       | Tur     | 38.49 | 0.68  | 32.69 | 5.27  |      | 7.41  | 0.68  | 1.78  |       |       |       |       |    |      |       |     |     |     |       |      |       |       |       |      |     | 87    | 100          |
| S18    | 13   | 17       | Dol     |       |       |       | 0.29  |      | 22.12 | 31.58 |       |       |       |       |       |    |      |       |     |     |     |       |      |       |       |       |      |     | 54    | 56           |
| S18    | 13   | 18       | Grt     | 40.42 |       | 21.47 | 24.96 | 0.87 | 5.39  | 6.89  |       |       |       |       |       |    |      |       |     |     |     |       |      |       |       |       |      |     | 100   | 112          |
| S18    | 13.1 | 1        | Chl     | 29.03 | 0.76  | 16.57 | 21.80 | 0.52 | 15.60 | 0.48  |       | 0.25  |       |       |       |    |      |       |     |     |     |       |      |       |       |       |      |     | 85    | 99           |
| S18    | 13.1 | 2        | Ttn     | 33.99 | 30.04 | 5.54  | 3.10  |      | 2.28  | 25.06 |       |       |       |       |       |    |      |       |     |     |     |       |      |       |       |       |      |     | 100   | 109          |
| S18    | 13.1 | 3        | TiO2    | 0.43  | 98.40 |       |       |      |       | 1.17  |       |       |       |       |       |    |      |       |     |     |     |       |      |       |       |       |      |     | 100   | 109          |
| S18    | 14   | 1        | Chl     | 24.82 |       | 21.50 | 28.21 | 0.35 | 10.12 |       |       |       |       |       |       |    |      |       |     |     |     |       |      |       |       |       |      |     | 85    | 95           |
| S18    | 14   | 2        | Grt     | 39.25 |       | 20.89 | 35.05 | 0.46 | 3.91  | 0.45  |       |       |       |       |       |    |      |       |     |     |     |       |      |       |       |       |      |     | 100   | 110          |
| S18    | 14   | 3        | Ms      | 52.06 | 0.47  | 22.09 | 6.36  |      | 3.12  |       |       | 10.90 |       |       |       |    |      |       |     |     |     |       |      |       |       |       |      |     | 95    | 107          |
| S18    | 14   | 4        | TiO2    |       | 99.57 |       | 0.43  |      |       |       |       |       |       |       |       |    |      |       |     |     |     |       |      |       |       |       |      |     | 100   | 106          |
| S18    | 14   | 5        | Grt     | 39.30 |       | 20.87 | 31.89 | 1.48 | 1.96  | 4.51  |       |       |       |       |       |    |      |       |     |     |     |       |      |       |       |       |      |     | 100   | 112          |
| S18    | 14   | 6        | Chr     |       |       | 8.39  | 22.03 |      | 8.85  |       |       |       |       |       |       |    |      | 60.73 |     |     |     |       |      |       |       |       |      |     | 100   | 107          |
| S18    | 14   | 7        | Py      |       |       |       | 29.07 |      |       |       |       |       |       | 70.93 |       |    |      |       |     |     |     |       |      |       |       |       |      |     | 100   | 227          |
| S18    | 14   | 8        | Grt     | 39.14 |       | 20.82 | 33.23 | 0.79 | 1.25  | 4.77  |       |       |       |       |       |    |      |       |     |     |     |       |      |       |       |       |      |     | 100   | 110          |
| S18    | 14   | 9        | Tur     | 38.96 | 0.38  | 32.54 | 6.29  |      | 6.44  | 0.38  | 1.83  | 0.18  |       |       |       |    |      |       |     |     |     |       |      |       |       |       |      |     | 87    | 97           |
| S18    | 14   | 10       | Ep      | 40.29 |       | 23.81 | 10.39 |      |       | 22.50 |       |       |       |       |       |    |      |       |     |     |     |       |      |       |       |       |      |     | 97    | 108          |
| S18    | 14   | 11       | Chr     |       |       | 27.01 | 22.03 |      | 12.42 |       |       |       |       |       |       |    |      | 38.54 |     |     |     |       |      |       |       |       |      |     | 100   | 111          |
| S18    | 14   | 12       | Grt     | 39.36 |       | 20.65 | 31.63 | 2.64 | 1.76  | 3.96  |       |       |       |       |       |    |      |       |     |     |     |       |      |       |       |       |      |     | 100   | 114          |
| S18    | 14   | 13       | Ttn     | 33.55 | 32.82 | 3.05  | 2.86  |      | 1.32  | 25.69 |       |       |       |       |       |    | 0.72 |       |     |     |     |       |      |       |       |       |      |     | 100   | 109          |
| S18    | 14   | 14       | Grt     | 39.09 |       | 20.79 | 35.12 | 0.43 | 2.46  | 2.10  |       |       |       |       |       |    |      |       |     |     |     |       |      |       |       |       |      |     | 100   | 114          |



Table B10.2: EDS analyses of sample S18

| Sample | Site | Position | Mineral | SiO2   | TiO2 | Al2O3 | FeO   | MnO  | MgO   | CaO   | Na2O  | K2O  | P2O5  | SO3 | F     | Cl | V2O5 | Cr2O3 | NiO | CuO  | ZnO  | ZrO2 | Ag2O  | La2O3 | Ce2O3 | Nd2O3 | HfO2 | WO3 | Total | Actual Total |
|--------|------|----------|---------|--------|------|-------|-------|------|-------|-------|-------|------|-------|-----|-------|----|------|-------|-----|------|------|------|-------|-------|-------|-------|------|-----|-------|--------------|
| S18    | 14   | 15       | Chl     | 28.22  |      | 17.82 | 24.34 | 0.57 | 14.04 |       |       |      |       |     |       |    |      |       |     |      |      |      |       |       |       |       |      |     | 85    | 99           |
| S18    | 14   | 16       | Dol     |        |      |       |       |      | 22.46 | 31.54 |       |      |       |     |       |    |      |       |     |      |      |      |       |       |       |       |      |     | 54    | 57           |
| S18    | 14   | 17       | Chl     | 25.97  |      | 22.32 | 26.95 | 0.57 | 9.20  |       |       |      |       |     |       |    |      |       |     |      |      |      |       |       |       |       |      |     | 85    | 98           |
| S18    | 14   | 18       | Ep      | 40.96  |      | 27.10 | 6.58  |      |       | 22.36 |       |      |       |     |       |    |      |       |     |      |      |      |       |       |       |       |      |     | 97    | 115          |
| S18    | 14   | 19       | Chr     |        |      | 10.85 | 20.76 |      | 9.64  |       |       |      |       |     |       |    |      | 58.76 |     |      |      |      |       |       |       |       |      |     | 100   | 109          |
| S18    | 15   | 1        | Grt     | 39.98  |      | 20.75 | 31.29 | 1.26 | 3.05  | 3.67  |       |      |       |     |       |    |      |       |     |      |      |      |       |       |       |       |      |     | 100   | 110          |
| S18    | 15   | 2        | Grt     | 39.64  |      | 21.17 | 30.61 | 0.71 | 4.29  | 3.57  |       |      |       |     |       |    |      |       |     |      |      |      |       |       |       |       |      |     | 100   | 111          |
| S18    | 15   | 3        | Mix     | 57.22  | 1.15 | 23.66 | 7.55  |      | 3.43  | 0.98  | 0.86  | 5.16 |       |     |       |    |      |       |     |      |      |      |       |       |       |       |      |     | 100   | 85           |
| S18    | 15   | 4        | Feohy + | 12.61  | 0.73 | 11.19 | 71.54 | 0.68 | 2.78  | 0.48  |       |      |       |     |       |    |      |       |     |      |      |      |       |       |       |       |      |     | 100   | 80           |
| S18    | 15   | 5        | Ep      | 40.82  |      | 23.97 | 10.62 |      | 0.54  | 21.05 |       |      |       |     |       |    |      |       |     |      |      |      |       |       |       |       |      |     | 97    | 100          |
| S18    | 15   | 6        | Chl     | 27.26  |      | 20.10 | 21.67 | 0.33 | 15.64 |       |       |      |       |     |       |    |      |       |     |      |      |      |       |       |       |       |      |     | 85    | 96           |
| S18    | 15   | 7        | Grt     | 40.21  |      | 21.21 | 26.34 | 1.18 | 5.02  | 6.04  |       |      |       |     |       |    |      |       |     |      |      |      |       |       |       |       |      |     | 100   | 113          |
| S18    | 15   | 8        | Grt     | 40.26  |      | 21.32 | 25.09 | 1.04 | 4.22  | 8.07  |       |      |       |     |       |    |      |       |     |      |      |      |       |       |       |       |      |     | 100   | 112          |
| S18    | 15   | 9        | Chl     | 27.57  |      | 20.14 | 22.14 |      | 15.15 |       |       |      |       |     |       |    |      |       |     |      |      |      |       |       |       |       |      |     | 85    | 97           |
| S18    | 15   | 10       | Ap      |        |      |       |       |      |       | 49.42 |       |      | 44.40 |     | 6.18  |    |      |       |     |      |      |      |       |       |       |       |      |     | 100   | 121          |
| S18    | 15   | 11       | Feohy + | 9.84   | 0.50 | 3.71  | 79.86 |      | 4.79  | 0.59  |       | 0.25 |       |     |       |    | 0.45 |       |     |      |      |      |       |       |       |       |      |     | 100   | 96           |
| S18    | 15   | 12       | Chl     | 26.14  |      | 21.63 | 20.51 | 0.22 | 16.16 |       | 0.34  |      |       |     |       |    |      |       |     |      |      |      |       |       |       |       |      |     | 85    | 99           |
| S18    | 15   | 13       | Spl     |        |      | 34.77 | 12.07 |      | 18.21 |       |       |      |       |     |       |    |      | 34.94 |     |      |      |      |       |       |       |       |      |     | 100   | 111          |
| S18    | 15   | 14       | Pg      | 50.27  |      | 36.14 | 0.79  |      |       |       | 6.96  | 0.84 |       |     |       |    |      |       |     |      |      |      |       |       |       |       |      |     | 95    | 85           |
| S18    | 15   | 15       | Chl     | 28.58  |      | 22.04 | 25.04 |      | 8.42  |       | 0.35  | 0.57 |       |     |       |    |      |       |     |      |      |      |       |       |       |       |      |     | 85    | 97           |
| S18    | 15   | 16       | Mnz     |        |      |       |       |      |       | 0.95  |       |      | 36.69 |     | 0.08  |    |      |       |     |      |      | 2.33 | 17.83 | 31.11 | 11.00 |       |      |     | 100   | 104          |
| S18    | 15   | 17       | Chr     |        |      | 23.79 | 19.21 |      | 13.04 |       |       |      |       |     |       |    |      | 43.95 |     |      |      |      |       |       |       |       |      |     | 100   | 112          |
| S18    | 15.1 | 1        | Ep      | 40.19  |      | 24.95 | 9.35  |      |       | 22.51 |       |      |       |     |       |    |      |       |     |      |      |      |       |       |       |       |      |     | 97    | 109          |
| S18    | 15.1 | 2        | Ab      | 69.79  |      | 18.62 |       |      |       |       | 11.59 |      |       |     |       |    |      |       |     |      |      |      |       |       |       |       |      |     | 100   | 118          |
| S18    | 15.1 | 3        | Chl     | 29.45  |      | 18.56 | 16.71 | 0.61 | 19.30 | 0.37  |       |      |       |     |       |    |      |       |     |      |      |      |       |       |       |       |      |     | 85    | 95           |
| S18    | 15.1 | 4        | Cpx     | 45.17  | 0.51 | 4.07  | 18.36 |      | 12.47 | 18.45 | 0.96  |      |       |     |       |    |      |       |     |      |      |      |       |       |       |       |      |     | 100   | 98           |
| S18    | 15.1 | 5        | Grt     | 39.83  | 1.16 | 1.58  | 23.55 |      | 2.99  | 30.88 |       |      |       |     |       |    |      |       |     |      |      |      |       |       |       |       |      |     | 100   | 105          |
| S18    | 15.1 | 6        | Feohy + | 6.87   | 3.61 | 6.15  | 80.85 |      | 1.29  | 0.66  |       |      |       |     |       |    | 0.58 |       |     |      |      |      |       |       |       |       |      |     | 100   | 75           |
| S18    | 15.1 | 7        | Ms +    | 57.20  | 0.46 | 24.18 | 8.92  |      | 3.52  | 0.78  | 0.86  | 4.07 |       |     |       |    |      |       |     |      |      |      |       |       |       |       |      |     | 100   | 93           |
| S18    | 15.2 | 1        | "Mag" + | 4.31   |      | 0.70  | 90.11 |      |       | 1.62  |       |      |       |     |       |    |      |       |     | 0.66 |      |      |       |       |       |       | 2.60 |     | 100   | 81           |
| S18    | 15.2 | 2        | Fl      | 0.98   |      | 0.42  | 0.34  |      |       | 51.11 |       | 0.11 |       |     | 47.04 |    |      |       |     |      |      |      |       |       |       |       |      |     | 100   | 113          |
| S18    | 16   | 1        | Chr     |        |      | 17.19 | 22.45 |      | 9.23  |       |       |      |       |     |       |    |      | 50.61 |     |      | 0.52 |      |       |       |       |       |      |     | 100   | 106          |
| S18    | 16   | 2        | Grt     | 41.56  |      | 21.65 | 2.10  |      |       | 34.69 |       |      |       |     |       |    |      |       |     |      |      |      |       |       |       |       |      |     | 100   | 113          |
| S18    | 16   | 3        | Chr     |        |      | 11.06 | 19.71 |      | 10.63 |       |       |      |       |     |       |    |      | 58.60 |     |      |      |      |       |       |       |       |      |     | 100   | 106          |
| S18    | 16   | 4        | Grt     | 39.91  |      | 20.58 | 28.10 | 1.38 | 1.46  | 8.56  |       |      |       |     |       |    |      |       |     |      |      |      |       |       |       |       |      |     | 100   | 110          |
| S18    | 16   | 5        | Chr     |        |      | 25.94 | 18.19 |      | 13.26 |       |       |      |       |     |       |    |      | 42.62 |     |      |      |      |       |       |       |       |      |     | 100   | 107          |
| S18    | 16   | 6        | Ep      | 40.44  |      | 25.56 | 8.41  |      |       | 22.59 |       |      |       |     |       |    |      |       |     |      |      |      |       |       |       |       |      |     | 97    | 108          |
| S18    | 16   | 7        | Grt     | 39.18  |      | 20.92 | 34.28 |      | 2.44  | 3.17  |       |      |       |     |       |    |      |       |     |      |      |      |       |       |       |       |      |     | 100   | 112          |
| S18    | 16   | 8        | Chl     | 31.10  |      | 19.64 | 21.99 |      | 10.60 | 0.49  | 0.60  | 0.58 |       |     |       |    |      |       |     |      |      |      |       |       |       |       |      |     | 85    | 97           |
| S18    | 16   | 9        | Mag +   | 2.50   | 0.97 |       | 95.41 |      | 0.76  |       |       |      |       |     |       |    |      | 0.36  |     |      |      |      |       |       |       |       |      |     | 100   | 93           |
| S18    | 16   | 10       | Chr     |        | 1.75 | 13.91 | 37.62 |      | 6.30  |       |       |      |       |     |       |    | 0.68 | 39.75 |     |      |      |      |       |       |       |       |      |     | 100   | 108          |
| S18    | 16   | 11       | Chl     | 24.89  |      | 21.49 | 25.83 | 0.40 | 12.39 |       |       |      |       |     |       |    |      |       |     |      |      |      |       |       |       |       |      |     | 85    | 98           |
| S18    | 16   | 12       | Grt     | 39.81  |      | 20.99 | 24.00 | 2.97 | 2.05  | 10.19 |       |      |       |     |       |    |      |       |     |      |      |      |       |       |       |       |      |     | 100   | 115          |
| S18    | 16   | 13       | Chr     |        |      | 29.58 | 18.77 |      | 13.94 |       |       |      |       |     |       |    |      | 37.71 |     |      |      |      |       |       |       |       |      |     | 100   | 112          |
| S18    | 16   | 14       | Qz      | 100.00 |      |       |       |      |       |       |       |      |       |     |       |    |      |       |     |      |      |      |       |       |       |       |      |     | 100   | 123          |
| S18    | 16   | 15       | Chr     |        |      | 29.14 | 16.63 |      | 14.66 |       |       |      |       |     |       |    |      | 39.57 |     |      |      |      |       |       |       |       |      |     | 100   | 109          |
| S18    | 16   | 16       | Tur     | 38.50  | 0.76 | 30.76 | 6.45  |      | 7.50  | 0.58  | 2.45  |      |       |     |       |    |      |       |     |      |      |      |       |       |       |       |      |     | 87    | 100          |
| S18    | 16   | 17       | Amph    | 44.53  | 2.88 | 10.15 | 11.03 | 0.29 | 14.82 | 10.48 | 2.43  | 0.39 |       |     |       |    |      |       |     |      |      |      |       |       |       |       |      |     | 97    | 114          |

Table B10.2: EDS analyses of sample S18

| Sample | Site | Position | Mineral | SiO2   | TiO2  | Al2O3 | FeO   | MnO   | MgO   | CaO   | Na2O  | K2O  | P2O5  | SO3  | F    | Cl   | V2O5  | Cr2O3 | NiO | CuO | ZnO   | ZrO2 | Ag2O | La2O3 | Ce2O3 | Nd2O3 | HfO2 | WO3  | Total | Actual Total |
|--------|------|----------|---------|--------|-------|-------|-------|-------|-------|-------|-------|------|-------|------|------|------|-------|-------|-----|-----|-------|------|------|-------|-------|-------|------|------|-------|--------------|
| S18    | 17   | 1        | Grt     | 39.49  |       | 21.08 | 33.84 | 0.88  | 4.08  | 0.63  |       |      |       |      |      |      |       |       |     |     |       |      |      |       |       |       |      |      | 100   | 111          |
| S18    | 17   | 2        | Qz      | 100.00 |       |       |       |       |       |       |       |      |       |      |      |      |       |       |     |     |       |      |      |       |       |       |      |      | 100   | 119          |
| S18    | 17   | 3        | Chl     | 27.11  |       | 19.69 | 24.33 | 0.35  | 13.52 |       |       |      |       |      |      |      |       |       |     |     |       |      |      |       |       |       |      |      | 85    | 97           |
| S18    | 17   | 4        | Ep      | 38.86  | 3.02  | 20.01 | 13.76 |       |       | 21.35 |       |      |       |      |      |      |       |       |     |     |       |      |      |       |       |       |      |      | 97    | 107          |
| S18    | 17   | 5        | Chl     | 24.92  |       | 20.96 | 30.01 | 0.46  | 8.42  |       |       |      |       |      |      |      | 0.23  |       |     |     |       |      |      |       |       |       |      |      | 85    | 98           |
| S18    | 17   | 6        | Chr     |        |       | 28.04 | 14.14 |       | 16.45 |       |       |      |       |      |      |      | 41.38 |       |     |     |       |      |      |       |       |       |      |      | 100   | 110          |
| S18    | 17   | 7        | Chr     | 0.67   |       | 17.01 | 19.02 |       | 10.74 |       |       |      |       |      |      |      | 52.57 |       |     |     |       |      |      |       |       |       |      |      | 100   | 107          |
| S18    | 17   | 8        | Zrn     | 31.12  |       |       | 0.37  |       |       |       |       |      |       |      |      |      |       |       |     |     | 68.51 |      |      |       |       |       |      |      | 100   | 119          |
| S18    | 17   | 9        | Chr     | 0.77   |       | 27.88 | 21.19 |       | 13.81 |       |       |      |       |      |      |      | 36.35 |       |     |     |       |      |      |       |       |       |      |      | 100   | 111          |
| S18    | 17   | 10       | Grt     | 39.51  |       | 20.95 | 29.00 | 1.02  | 2.19  | 7.32  |       |      |       |      |      |      |       |       |     |     |       |      |      |       |       |       |      |      | 100   | 113          |
| S18    | 17   | 11       | Spl     |        |       | 42.22 | 14.18 |       | 17.68 |       |       |      |       |      |      |      | 25.92 |       |     |     |       |      |      |       |       |       |      |      | 100   | 107          |
| S18    | 17   | 12       | Chl +   | 32.51  | 1.40  | 20.33 | 24.73 |       | 14.99 | 0.23  |       | 0.83 |       | 4.97 |      |      |       |       |     |     |       |      |      |       |       |       |      |      | 100   | 107          |
| S18    | 17   | 13       | Dol     |        |       |       |       |       | 22.63 | 31.37 |       |      |       |      |      |      |       |       |     |     |       |      |      |       |       |       |      |      | 54    | 57           |
| S18    | 17   | 14       | Amph    | 54.95  |       | 3.21  | 9.90  | 0.44  | 17.45 | 10.67 | 0.38  |      |       |      |      |      |       |       |     |     |       |      |      |       |       |       |      |      | 97    | 107          |
| S18    | 17   | 15       | TiO2    | 2.75   | 96.64 | 0.61  |       |       |       |       |       |      |       |      |      |      |       |       |     |     |       |      |      |       |       |       |      |      | 100   | 105          |
| S18    | 17   | 16       | Chl     | 27.34  | 0.32  | 21.27 | 18.02 |       | 17.72 |       | 0.33  |      |       |      |      |      |       |       |     |     |       |      |      |       |       |       |      |      | 85    | 97           |
| S18    | 17   | 17       | Chl     | 26.99  |       | 20.93 | 24.75 | 0.32  | 12.00 |       |       |      |       |      |      |      |       |       |     |     |       |      |      |       |       |       |      |      | 85    | 98           |
| S18    | 17   | 18       | Grt     | 39.93  |       | 21.10 | 28.86 | 0.98  | 5.20  | 3.92  |       |      |       |      |      |      |       |       |     |     |       |      |      |       |       |       |      |      | 100   | 114          |
| S18    | 17   | 19       | Feohy   |        | 10.66 | 4.26  | 79.80 | 1.08  | 3.59  |       |       |      |       |      |      |      | 0.61  |       |     |     |       |      |      |       |       |       |      |      | 100   | 100          |
| S18    | 17   | 20       | Chl     | 24.74  |       | 21.48 | 28.60 | 0.87  | 9.03  |       |       |      |       |      |      |      | 0.29  |       |     |     |       |      |      |       |       |       |      |      | 85    | 100          |
| S18    | 17   | 21       | Chr     |        |       | 15.85 | 22.36 |       | 9.94  |       |       |      |       |      |      |      | 0.44  | 51.41 |     |     |       |      |      |       |       |       |      |      | 100   | 110          |
| S18    | 17.1 | 1        | Rds +   | 1.62   |       |       |       | 93.16 | 2.66  | 2.55  |       |      |       |      |      |      |       |       |     |     |       |      |      |       |       |       |      |      | 100   | 60           |
| S18    | 17.1 | 2        | Qz +    | 89.11  |       | 5.72  | 2.03  | 0.48  | 1.20  |       |       | 1.20 |       |      |      |      | 0.26  |       |     |     |       |      |      |       |       |       |      |      | 100   | 113          |
| S18    | 17.1 | 3        | Ep      | 39.88  |       | 23.28 | 11.19 |       |       | 22.65 |       |      |       |      |      |      |       |       |     |     |       |      |      |       |       |       |      |      | 97    | 110          |
| S18    | 17.1 | 4        | Ab      | 68.52  |       | 19.07 | 0.42  |       |       | 0.58  | 11.41 |      |       |      |      |      |       |       |     |     |       |      |      |       |       |       |      |      | 100   | 118          |
| S18    | 18   | 1        | Chr     |        |       | 11.75 | 16.49 |       | 9.95  |       |       |      |       |      |      |      | 61.81 |       |     |     |       |      |      |       |       |       |      |      | 100   | 104          |
| S18    | 18   | 2        | Ep      | 39.92  |       | 22.29 | 12.32 |       | 0.38  | 22.09 |       |      |       |      |      |      |       |       |     |     |       |      |      |       |       |       |      |      | 97    | 104          |
| S18    | 18   | 3        | Chl +   | 35.14  |       | 18.65 | 20.45 | 0.37  | 9.52  | 0.87  |       |      |       |      |      |      |       |       |     |     |       |      |      |       |       |       |      |      | 85    | 111          |
| S18    | 18   | 4        | Grt     | 39.98  |       | 21.13 | 27.07 | 1.86  | 4.11  | 5.85  |       |      |       |      |      |      |       |       |     |     |       |      |      |       |       |       |      |      | 100   | 110          |
| S18    | 18   | 5        | Chl     | 26.08  |       | 19.91 | 26.78 | 0.35  | 11.89 |       |       |      |       |      |      |      |       |       |     |     |       |      |      |       |       |       |      |      | 85    | 96           |
| S18    | 18   | 6        | Chl     | 27.17  |       | 22.29 | 17.03 |       | 18.51 |       |       |      |       |      |      |      |       |       |     |     |       |      |      |       |       |       |      |      | 85    | 97           |
| S18    | 18   | 7        | Chr     |        |       | 18.21 | 18.21 |       | 11.57 |       |       |      |       |      |      |      | 0.38  | 51.63 |     |     |       |      |      |       |       |       |      |      | 100   | 108          |
| S18    | 18   | 8        | Chl     | 25.55  |       | 20.55 | 22.99 |       | 15.58 |       | 0.33  |      |       |      |      |      |       |       |     |     |       |      |      |       |       |       |      |      | 85    | 86           |
| S18    | 18   | 9        | Chr     |        |       | 9.79  | 21.99 |       | 9.59  |       |       |      |       |      |      |      |       | 58.62 |     |     |       |      |      |       |       |       |      |      | 100   | 105          |
| S18    | 18   | 10       | TiO2    |        | 99.44 |       | 0.56  |       |       |       |       |      |       |      |      |      |       |       |     |     |       |      |      |       |       |       |      |      | 100   | 106          |
| S18    | 18   | 11       | Chr     |        |       | 10.42 | 23.04 |       | 8.90  |       |       |      |       |      |      |      |       | 57.64 |     |     |       |      |      |       |       |       |      |      | 100   | 107          |
| S18    | 18   | 12       | Chl     | 26.18  |       | 20.72 | 22.52 |       | 14.96 |       |       |      |       |      |      |      |       | 0.62  |     |     |       |      |      |       |       |       |      |      | 85    | 99           |
| S18    | 18   | 13       | Grt     | 39.91  |       | 21.13 | 27.04 | 0.39  | 1.93  | 9.60  |       |      |       |      |      |      |       |       |     |     |       |      |      |       |       |       |      |      | 100   | 113          |
| S18    | 18   | 14       | Ep      | 40.62  |       | 23.97 | 6.89  |       | 2.67  | 22.85 |       |      |       |      |      |      |       |       |     |     |       |      |      |       |       |       |      |      | 97    | 101          |
| S18    | 18   | 15       | Ms +    | 51.30  | 0.56  | 25.49 | 2.30  |       | 4.70  |       | 0.76  | 6.86 |       |      | 7.67 |      | 0.34  |       |     |     |       |      |      |       |       |       |      |      | 100   | 110          |
| S18    | 18   | 16       | Ap      |        |       |       |       |       |       | 49.15 |       |      | 45.09 |      | 2.78 | 1.54 |       |       |     |     |       |      |      |       |       |       |      | 1.44 | 100   | 115          |
| S18    | 18   | 17       | Chr     |        |       | 23.98 | 16.92 |       | 13.92 |       |       |      |       |      |      |      | 0.41  | 44.78 |     |     |       |      |      |       |       |       |      |      | 100   | 106          |
| S18    | 18   | 18       | Dol     |        |       |       | 0.57  |       | 20.33 | 33.09 |       |      |       |      |      |      |       |       |     |     |       |      |      |       |       |       |      |      | 54    | 56           |
| S18    | 18   | 19       | Grt     | 39.87  |       | 20.86 | 31.56 | 2.05  | 3.89  | 1.77  |       |      |       |      |      |      |       |       |     |     |       |      |      |       |       |       |      |      | 100   | 113          |
| S18    | 18   | 20       | Chl     | 25.63  |       | 21.96 | 23.86 |       | 13.55 |       |       |      |       |      |      |      |       |       |     |     |       |      |      |       |       |       |      |      | 85    | 100          |
| S18    | 19   | 1        | Dol     |        |       |       |       |       | 22.53 | 31.47 |       |      |       |      |      |      |       |       |     |     |       |      |      |       |       |       |      |      | 54    | 57           |
| S18    | 19   | 2        | Ap      |        |       |       |       |       | 48.15 |       |       |      | 43.52 |      | 6.91 |      |       |       |     |     |       |      |      |       |       |       |      | 1.43 | 100   | 120          |
| S18    | 19   | 3        | Chr     |        | 1.41  | 17.21 | 31.22 |       | 8.65  |       |       |      |       |      |      |      | 0.52  | 40.98 |     |     |       |      |      |       |       |       |      |      | 100   | 106          |

Table B10.2: EDS analyses of sample S18

| Sample | Site | Position | Mineral | SiO2  | TiO2   | Al2O3 | FeO   | MnO   | MgO   | CaO   | Na2O  | K2O   | P2O5  | SO3 | F    | Cl   | V2O5 | Cr2O3 | NiO | CuO | ZnO  | ZrO2 | Ag2O | La2O3 | Ce2O3 | Nd2O3 | HfO2 | WO3 | Total | Actual Total |
|--------|------|----------|---------|-------|--------|-------|-------|-------|-------|-------|-------|-------|-------|-----|------|------|------|-------|-----|-----|------|------|------|-------|-------|-------|------|-----|-------|--------------|
| S18    | 19   | 4        | Ttn     | 33.32 | 36.07  | 2.01  | 0.57  |       |       | 28.04 |       |       |       |     |      |      |      |       |     |     |      |      |      |       |       |       |      |     | 100   | 109          |
| S18    | 19   | 5        | TiO2    |       | 100.00 |       |       |       |       |       |       |       |       |     |      |      |      |       |     |     |      |      |      |       |       |       |      |     | 100   | 105          |
| S18    | 19   | 6        | Ap      |       |        |       |       |       |       | 50.64 |       |       | 45.95 |     | 3.13 | 0.28 |      |       |     |     |      |      |      |       |       |       |      |     | 100   | 112          |
| S18    | 19   | 7        | Chl     | 25.75 |        | 21.42 | 24.63 |       | 13.20 |       |       |       |       |     |      |      |      |       |     |     |      |      |      |       |       |       |      |     | 85    | 95           |
| S18    | 19   | 8        | Chr     |       | 0.36   | 17.81 | 29.59 |       | 9.41  |       |       |       |       |     |      |      |      | 42.83 |     |     |      |      |      |       |       |       |      |     | 100   | 106          |
| S18    | 19   | 9        | Grt     | 39.71 |        | 21.20 | 24.71 | 2.36  | 2.77  | 9.25  |       |       |       |     |      |      |      |       |     |     |      |      |      |       |       |       |      |     | 100   | 112          |
| S18    | 19   | 10       | Ap      |       |        |       | 0.39  | 0.41  |       | 49.22 |       |       | 45.13 |     | 3.98 | 0.87 |      |       |     |     |      |      |      |       |       |       |      |     | 100   | 119          |
| S18    | 19   | 11       | Amph    | 52.98 | 0.29   | 5.12  | 10.47 | 0.23  | 17.29 | 9.72  | 0.54  |       |       |     |      |      |      | 0.36  |     |     |      |      |      |       |       |       |      |     | 97    | 112          |
| S18    | 19   | 12       | Grt     | 39.66 |        | 20.58 | 22.91 | 5.56  | 2.69  | 8.60  |       |       |       |     |      |      |      |       |     |     |      |      |      |       |       |       |      |     | 100   | 114          |
| S18    | 19   | 13       | Grt     | 39.39 |        | 20.58 | 17.98 | 12.21 | 0.53  | 9.32  |       |       |       |     |      |      |      |       |     |     |      |      |      |       |       |       |      |     | 100   | 116          |
| S18    | 19   | 14       | TiO2    |       | 99.13  |       | 0.87  |       |       |       |       |       |       |     |      |      |      |       |     |     |      |      |      |       |       |       |      |     | 100   | 109          |
| S18    | 19   | 15       | Chl     | 20.92 | 0.82   | 17.38 |       |       | 8.70  | 0.69  |       |       |       |     |      |      |      |       |     |     |      |      |      |       |       |       | 2.74 |     | 85    | 64           |
| S18    | 19   | 16       | Grt     | 39.96 |        | 21.04 | 25.06 | 0.97  | 3.18  | 9.80  |       |       |       |     |      |      |      |       |     |     |      |      |      |       |       |       |      |     | 100   | 111          |
| S18    | 19   | 17       | Grt     | 39.74 |        | 21.31 | 30.07 | 1.09  | 3.80  | 3.98  |       |       |       |     |      |      |      |       |     |     |      |      |      |       |       |       |      |     | 100   | 113          |
| S18    | 19   | 18       | Grt     | 39.43 |        | 20.86 | 29.06 | 3.07  | 3.05  | 4.53  |       |       |       |     |      |      |      |       |     |     |      |      |      |       |       |       |      |     | 100   | 112          |
| S18    | 19.1 | 1        | Ttn     | 34.08 | 27.99  | 6.56  | 1.39  |       |       | 26.44 |       |       |       |     | 3.54 |      |      |       |     |     |      |      |      |       |       |       |      |     | 100   | 114          |
| S18    | 19.1 | 2        | Kfs     | 65.40 | 0.58   | 17.87 | 0.49  |       |       |       |       | 15.66 |       |     |      |      |      |       |     |     |      |      |      |       |       |       |      |     | 100   | 117          |
| S18    | 19.1 | 3        | Feohy + | 7.24  | 3.45   | 3.07  | 85.20 |       |       | 1.05  |       |       |       |     |      |      |      |       |     |     |      |      |      |       |       |       |      |     | 100   | 93           |
| S18    | 19.1 | 4        | Qz      | 98.97 | 0.26   |       | 0.77  |       |       |       |       |       |       |     |      |      |      |       |     |     |      |      |      |       |       |       |      |     | 100   | 122          |
| S18    | 19.1 | 5        | Feohy + | 16.52 |        | 4.72  | 76.30 | 0.43  | 1.14  | 0.53  |       | 0.37  |       |     |      |      |      |       |     |     |      |      |      |       |       |       |      |     | 100   | 84           |
| S18    | 19.1 | 6        | Ab      | 69.02 |        | 18.99 | 0.42  |       |       | 0.54  | 11.03 |       |       |     |      |      |      |       |     |     |      |      |      |       |       |       |      |     | 100   | 119          |
| S18    | 19.1 | 7        | Feohy + | 5.68  |        | 2.93  | 84.17 |       | 1.91  | 0.72  |       |       | 1.18  |     |      |      |      |       |     |     |      |      |      |       |       |       | 3.41 |     | 100   | 72           |
| S18    | 20   | 1        | Dol     |       |        |       |       |       | 22.43 | 31.57 |       |       |       |     |      |      |      |       |     |     |      |      |      |       |       |       |      |     | 54    | 55           |
| S18    | 20   | 2        | Qz      | 99.56 |        | 0.44  |       |       |       |       |       |       |       |     |      |      |      |       |     |     |      |      |      |       |       |       |      |     | 100   | 117          |
| S18    | 20   | 3        | Chr     |       |        | 16.93 | 20.22 |       | 10.91 |       |       |       |       |     |      |      |      | 51.94 |     |     |      |      |      |       |       |       |      |     | 100   | 105          |
| S18    | 20   | 4        | Ep      | 39.86 |        | 24.38 | 10.44 |       |       | 22.33 |       |       |       |     |      |      |      |       |     |     |      |      |      |       |       |       |      |     | 97    | 106          |
| S18    | 20   | 5        | Ap +    | 1.70  |        | 0.54  | 1.05  |       |       | 48.11 |       |       | 41.69 |     | 5.32 |      |      |       |     |     |      |      |      |       |       |       | 1.59 |     | 100   | 112          |
| S18    | 20   | 6        | Chr     |       |        | 24.69 | 18.46 |       | 13.11 |       |       |       |       |     |      |      | 0.36 | 43.38 |     |     |      |      |      |       |       |       |      |     | 100   | 108          |
| S18    | 20   | 7        | Chr     | 0.99  |        | 9.64  | 22.50 |       | 9.04  |       |       |       |       |     |      |      |      | 57.83 |     |     |      |      |      |       |       |       |      |     | 100   | 106          |
| S18    | 20   | 8        | Dol     |       |        |       |       |       | 22.43 | 31.57 |       |       |       |     |      |      |      |       |     |     |      |      |      |       |       |       |      |     | 54    | 56           |
| S18    | 20   | 9        | Amph    | 49.98 | 0.28   | 9.98  | 6.14  |       | 18.26 | 10.72 | 1.64  |       |       |     |      |      |      |       |     |     |      |      |      |       |       |       |      |     | 97    | 112          |
| S18    | 20   | 10       | Ab      | 68.70 |        | 19.58 |       |       |       | 0.57  | 11.15 |       |       |     |      |      |      |       |     |     |      |      |      |       |       |       |      |     | 100   | 116          |
| S18    | 20   | 11       | Ap      |       |        |       |       |       |       | 48.73 |       |       | 44.16 |     | 5.59 |      |      |       |     |     |      |      |      |       |       |       | 1.52 |     | 100   | 123          |
| S18    | 20   | 12       | Chl     | 27.29 |        | 20.47 | 23.59 |       | 13.41 | 0.24  |       |       |       |     |      |      |      |       |     |     |      |      |      |       |       |       |      |     | 85    | 97           |
| S18    | 20   | 13       | Cpx     | 50.18 | 2.37   | 4.79  | 6.68  |       | 13.59 | 21.99 | 0.40  |       |       |     |      |      |      |       |     |     |      |      |      |       |       |       |      |     | 100   | 115          |
| S18    | 20   | 14       | Chl     | 25.03 |        | 22.02 | 25.17 |       | 12.78 |       |       |       |       |     |      |      |      |       |     |     |      |      |      |       |       |       |      |     | 85    | 95           |
| S18    | 20   | 15       | Ms      | 50.55 | 0.63   | 24.74 | 4.39  |       | 3.67  |       |       | 11.02 |       |     |      |      |      |       |     |     |      |      |      |       |       |       |      |     | 95    | 109          |
| S18    | 20   | 16       | Tur     | 38.88 | 0.50   | 31.75 | 3.81  |       | 9.00  | 0.75  | 2.32  |       |       |     |      |      |      |       |     |     |      |      |      |       |       |       |      |     | 87    | 102          |
| S18    | 20   | 17       | Dol     |       |        |       |       |       | 22.57 | 31.43 |       |       |       |     |      |      |      |       |     |     |      |      |      |       |       |       |      |     | 54    | 58           |
| S18    | 20   | 18       | Chr     |       |        | 8.10  | 21.10 |       | 8.98  |       |       |       |       |     |      |      | 0.53 | 61.29 |     |     |      |      |      |       |       |       |      |     | 100   | 111          |
| S18    | 20.1 | 1        | Kfs     | 63.76 |        | 18.03 | 1.48  |       | 0.49  | 1.46  | 5.10  | 8.97  | 0.70  |     |      |      |      |       |     |     |      |      |      |       |       |       |      |     | 100   | 117          |
| S18    | 20.1 | 2        | Feohy + | 11.66 | 14.45  | 4.83  | 60.50 | 5.21  |       |       | 1.26  | 0.34  |       |     |      |      |      |       |     |     | 1.75 |      |      |       |       |       |      |     | 100   | 99           |
| S18    | 20.1 | 3        | Ab      | 68.40 |        | 19.28 | 0.34  |       |       | 0.42  | 11.18 | 0.39  |       |     |      |      |      |       |     |     |      |      |      |       |       |       |      |     | 100   | 118          |
| S18    | 21   | 1        | Grt     | 38.93 |        | 20.78 | 25.77 | 8.18  | 1.46  | 4.87  |       |       |       |     |      |      |      |       |     |     |      |      |      |       |       |       |      |     | 100   | 112          |
| S18    | 21   | 2        | Amph    | 54.51 | 0.26   | 2.81  | 12.60 | 0.32  | 16.63 | 9.41  | 0.46  |       |       |     |      |      |      |       |     |     |      |      |      |       |       |       |      |     | 97    | 112          |
| S18    | 21   | 3        | Pg      | 48.15 |        | 38.03 | 0.59  |       |       | 0.26  | 7.51  | 0.47  |       |     |      |      |      |       |     |     |      |      |      |       |       |       |      |     | 95    | 107          |
| S18    | 21   | 4        | Grt     | 39.65 |        | 20.30 | 21.33 | 10.51 | 2.13  | 6.08  |       |       |       |     |      |      |      |       |     |     |      |      |      |       |       |       |      |     | 100   | 113          |
| S18    | 21   | 5        | Ep      | 39.47 |        | 20.09 | 15.00 | 0.34  | 5.72  | 16.38 |       |       |       |     |      |      |      |       |     |     |      |      |      |       |       |       |      |     | 97    | 100          |

Table B10.2: EDS analyses of sample S18

| Sample | Site | Position | Mineral | SiO2  | TiO2  | Al2O3 | FeO   | MnO  | MgO   | CaO   | Na2O  | K2O   | P2O5 | SO3 | F     | Cl   | V2O5 | Cr2O3 | NiO | CuO | ZnO  | ZrO2 | Ag2O | La2O3 | Ce2O3 | Nd2O3 | HfO2 | WO3 | Total | Actual Total |
|--------|------|----------|---------|-------|-------|-------|-------|------|-------|-------|-------|-------|------|-----|-------|------|------|-------|-----|-----|------|------|------|-------|-------|-------|------|-----|-------|--------------|
| S18    | 21   | 6        | Grt     | 40.05 |       | 21.38 | 31.98 | 1.09 | 3.59  | 1.91  |       |       |      |     |       |      |      |       |     |     |      |      |      |       |       |       |      |     | 100   | 111          |
| S18    | 21   | 7        | Tur     | 38.37 | 0.66  | 33.54 | 5.31  |      | 6.71  | 0.41  | 2.00  |       |      |     |       |      |      |       |     |     |      |      |      |       |       |       |      |     | 87    | 97           |
| S18    | 21   | 8        | Grt     | 39.48 |       | 22.84 | 27.54 | 0.61 | 0.68  | 8.78  |       |       |      |     |       |      |      |       |     |     | 0.08 |      |      |       |       |       |      |     | 100   | 112          |
| S18    | 21   | 9        | Chl     | 26.51 |       | 21.34 | 20.02 |      | 17.13 |       |       |       |      |     |       |      |      |       |     |     |      |      |      |       |       |       |      |     | 85    | 95           |
| S18    | 21   | 10       | Chr     |       | 2.21  | 20.71 | 23.35 |      | 13.38 |       |       |       |      |     |       |      |      | 40.35 |     |     |      |      |      |       |       |       |      |     | 100   | 103          |
| S18    | 21   | 11       | Chr     |       | 0.40  | 25.24 | 17.01 |      | 13.77 |       |       |       |      |     |       |      |      | 43.57 |     |     |      |      |      |       |       |       |      |     | 100   | 107          |
| S18    | 21   | 12       | Chl     | 25.30 |       | 21.56 | 24.89 | 0.37 | 12.43 |       | 0.46  |       |      |     |       |      |      |       |     |     |      |      |      |       |       |       |      |     | 85    | 94           |
| S18    | 21   | 13       | Chr     |       | 0.49  | 26.21 | 22.23 |      | 12.13 |       |       |       |      |     |       |      |      | 38.95 |     |     |      |      |      |       |       |       |      |     | 100   | 107          |
| S18    | 21   | 14       | Ttn     | 32.93 | 37.53 | 1.10  | 0.69  |      |       | 27.75 |       |       |      |     |       |      |      |       |     |     |      |      |      |       |       |       |      |     | 100   | 108          |
| S18    | 21   | 15       | Qz      | 99.50 |       | 0.50  |       |      |       |       |       |       |      |     |       |      |      |       |     |     |      |      |      |       |       |       |      |     | 100   | 118          |
| S18    | 21   | 16       | Grt     | 39.34 |       | 20.67 | 31.92 | 3.22 | 3.32  | 1.53  |       |       |      |     |       |      |      |       |     |     |      |      |      |       |       |       |      |     | 100   | 112          |
| S18    | 21   | 17       | Chl     | 27.34 |       | 20.86 | 20.30 |      | 15.89 |       | 0.62  |       |      |     |       |      |      |       |     |     |      |      |      |       |       |       |      |     | 85    | 94           |
| S18    | 21   | 18       | Amph    | 49.03 | 1.06  | 8.23  | 11.54 | 0.31 | 14.06 | 11.26 | 1.07  | 0.45  |      |     |       |      |      |       |     |     |      |      |      |       |       |       |      |     | 97    | 113          |
| S18    | 21   | 19       | Grt     | 39.31 |       | 20.93 | 31.72 | 1.51 | 1.74  | 4.80  |       |       |      |     |       |      |      |       |     |     |      |      |      |       |       |       |      |     | 100   | 109          |
| S18    | 22   | 1        | Ms +    | 47.85 | 1.48  | 29.20 | 4.41  |      | 1.44  |       | 0.48  | 10.14 |      |     |       |      |      |       |     |     |      |      |      |       |       |       |      |     | 95    | 108          |
| S18    | 22   | 2        | Ep      | 40.33 |       | 25.65 | 8.56  |      |       | 22.45 |       |       |      |     |       |      |      |       |     |     |      |      |      |       |       |       |      |     | 97    | 104          |
| S18    | 22   | 3        | Grt     | 40.04 | 0.33  | 20.83 | 30.50 |      | 3.81  | 4.49  |       |       |      |     |       |      |      |       |     |     |      |      |      |       |       |       |      |     | 100   | 112          |
| S18    | 22   | 4        | Ep      | 39.80 |       | 23.18 | 11.39 | 0.38 |       | 22.25 |       |       |      |     |       |      |      |       |     |     |      |      |      |       |       |       |      |     | 97    | 109          |
| S18    | 22   | 5        | Chr     |       |       | 22.03 | 19.71 |      | 12.75 |       |       |       |      |     |       |      |      | 45.51 |     |     |      |      |      |       |       |       |      |     | 100   | 108          |
| S18    | 22   | 6        | Feohy + | 5.40  | 10.04 | 4.76  | 73.90 | 3.69 | 0.97  | 0.26  |       | 0.26  |      |     |       |      | 0.73 |       |     |     |      |      |      |       |       |       |      |     | 100   | 98           |
| S18    | 22   | 7        | Chr     |       |       | 8.93  | 20.41 |      | 10.50 |       |       |       |      |     |       |      |      | 60.16 |     |     |      |      |      |       |       |       |      |     | 100   | 107          |
| S18    | 22   | 8        | Amph    | 46.73 | 0.82  | 11.56 | 9.27  |      | 15.21 | 10.85 | 2.16  |       |      |     |       |      |      | 0.40  |     |     |      |      |      |       |       |       |      |     | 97    | 108          |
| S18    | 22   | 9        | Grt     | 40.54 |       | 21.30 | 22.73 | 0.75 | 6.09  | 8.60  |       |       |      |     |       |      |      |       |     |     |      |      |      |       |       |       |      |     | 100   | 111          |
| S18    | 22   | 10       | Grt     | 39.80 |       | 20.70 | 29.01 | 0.89 | 1.70  | 7.89  |       |       |      |     |       |      |      |       |     |     |      |      |      |       |       |       |      |     | 100   | 110          |
| S18    | 22   | 11       | Ms      | 49.66 | 1.10  | 27.14 | 3.99  |      | 2.46  |       | 0.29  | 10.35 |      |     |       |      |      |       |     |     |      |      |      |       |       |       |      |     | 95    | 102          |
| S18    | 22   | 12       | Qz      | 96.78 |       | 0.76  | 1.32  |      | 1.14  |       |       |       |      |     |       |      |      |       |     |     |      |      |      |       |       |       |      |     | 100   | 113          |
| S18    | 22   | 13       | Ttn     | 33.10 | 35.90 | 2.52  | 0.33  |      |       | 28.16 |       |       |      |     |       |      |      |       |     |     |      |      |      |       |       |       |      |     | 100   | 110          |
| S18    | 22   | 14       | Cpx     | 54.22 | 0.46  | 2.67  | 3.30  |      | 16.78 | 22.27 |       |       |      |     |       |      |      | 0.29  |     |     |      |      |      |       |       |       |      |     | 100   | 116          |
| S18    | 22   | 15       | Chr     |       |       | 10.22 | 24.46 |      | 9.48  |       |       |       |      |     |       |      |      | 55.85 |     |     |      |      |      |       |       |       |      |     | 100   | 107          |
| S18    | 22   | 16       | Grt     | 39.57 |       | 20.98 | 29.67 | 0.30 | 2.33  | 7.15  |       |       |      |     |       |      |      |       |     |     |      |      |      |       |       |       |      |     | 100   | 113          |
| S18    | 22   | 17       | Hole    | 44.13 |       | 21.30 | 2.20  |      | 3.06  |       |       | 8.40  |      |     | 19.68 | 1.24 |      |       |     |     |      |      |      |       |       |       |      |     | 100   | 10           |
| S18    | 22   | 18       | Ep      | 40.13 |       | 23.79 | 10.41 |      |       | 22.67 |       |       |      |     |       |      |      |       |     |     |      |      |      |       |       |       |      |     | 97    | 111          |
| S18    | 22   | 19       | Chl     | 26.77 |       | 21.50 | 19.88 | 0.25 | 16.60 |       |       |       |      |     |       |      |      |       |     |     |      |      |      |       |       |       |      |     | 85    | 93           |
| S18    | 22   | 20       | Ep      | 39.17 |       | 22.26 | 11.38 |      | 6.50  | 15.40 | 0.45  |       |      |     |       |      |      |       |     |     |      |      |      |       |       |       | 1.84 | 97  | 107   |              |
| S18    | 22   | 21       | Ilm     |       | 57.32 |       | 39.72 | 1.76 | 1.20  |       |       |       |      |     |       |      |      |       |     |     |      |      |      |       |       |       |      |     | 100   | 103          |
| S18    | 22   | 22       | Grt     | 39.36 |       | 20.93 | 26.76 | 2.85 | 0.71  | 9.39  |       |       |      |     |       |      |      |       |     |     |      |      |      |       |       |       |      |     | 100   | 114          |
| S18    | 22.1 | 1        | Ab      | 69.48 |       | 18.79 |       |      |       | 0.23  | 11.50 |       |      |     |       |      |      |       |     |     |      |      |      |       |       |       |      |     | 100   | 118          |
| S18    | 22.1 | 2        | Ep      | 41.22 |       | 31.23 | 1.94  |      |       | 22.61 |       |       |      |     |       |      |      |       |     |     |      |      |      |       |       |       |      |     | 97    | 109          |
| S18    | 22.1 | 3        | Feohy + | 6.28  |       | 2.45  | 89.94 | 0.77 |       | 0.57  |       |       |      |     |       |      |      |       |     |     |      |      |      |       |       |       |      |     | 100   | 68           |
| S18    | 23   | 1        | Dol     |       |       |       |       | 0.84 | 20.66 | 32.50 |       |       |      |     |       |      |      |       |     |     |      |      |      |       |       |       |      |     | 54    | 54           |
| S18    | 23   | 2        | Chl     | 25.43 |       | 21.05 | 27.30 |      | 11.21 |       |       |       |      |     |       |      |      |       |     |     |      |      |      |       |       |       |      |     | 85    | 93           |
| S18    | 23   | 3        | Chr     |       |       | 25.02 | 15.77 |      | 14.11 |       |       |       |      |     |       |      |      | 45.11 |     |     |      |      |      |       |       |       |      |     | 100   | 107          |
| S18    | 23   | 4        | Grt     | 39.60 |       | 21.29 | 30.28 | 0.77 | 4.64  | 3.41  |       |       |      |     |       |      |      |       |     |     |      |      |      |       |       |       |      |     | 100   | 113          |
| S18    | 23   | 5        | Grt     | 40.34 |       | 21.50 | 27.07 | 0.81 | 9.36  | 0.92  |       |       |      |     |       |      |      |       |     |     |      |      |      |       |       |       |      |     | 100   | 111          |
| S18    | 23   | 6        | Ep      | 40.44 |       | 24.63 | 9.44  |      |       | 22.49 |       |       |      |     |       |      |      |       |     |     |      |      |      |       |       |       |      |     | 97    | 106          |
| S18    | 23   | 7        | Ep      | 39.95 |       | 21.79 | 12.98 |      |       | 22.28 |       |       |      |     |       |      |      |       |     |     |      |      |      |       |       |       |      |     | 97    | 106          |
| S18    | 23   | 8        | Chl     | 25.62 |       | 19.96 | 26.70 |      | 12.09 |       | 0.64  |       |      |     |       |      |      |       |     |     |      |      |      |       |       |       |      |     | 85    | 95           |
| S18    | 23   | 9        | Chl     | 26.08 |       | 20.33 | 26.04 | 1.16 | 11.40 |       |       |       |      |     |       |      |      |       |     |     |      |      |      |       |       |       |      |     | 85    | 98           |

Table B10.2: EDS analyses of sample S18

| Sample | Site | Position | Mineral             | SiO2   | TiO2  | Al2O3 | FeO   | MnO  | MgO   | CaO   | Na2O | K2O  | P2O5  | SO3 | F    | Cl | V2O5 | Cr2O3 | NiO | CuO | ZnO | ZrO2  | Ag2O | La2O3 | Ce2O3 | Nd2O3 | HfO2 | WO3  | Total | Actual Total |
|--------|------|----------|---------------------|--------|-------|-------|-------|------|-------|-------|------|------|-------|-----|------|----|------|-------|-----|-----|-----|-------|------|-------|-------|-------|------|------|-------|--------------|
| S18    | 23   | 10       | Qz                  | 99.74  |       |       | 0.26  |      |       |       |      |      |       |     |      |    |      |       |     |     |     |       |      |       |       |       |      |      | 100   | 117          |
| S18    | 23   | 11       | "Ilm"               |        | 62.10 |       | 35.33 | 2.56 |       |       |      |      |       |     |      |    |      |       |     |     |     |       |      |       |       |       |      |      | 100   | 98           |
| S18    | 23   | 12       | Chr                 |        | 0.76  | 25.72 | 27.17 |      | 10.19 |       |      |      |       |     |      |    |      | 36.17 |     |     |     |       |      |       |       |       |      |      | 100   | 110          |
| S18    | 23   | 13       | Ap                  |        |       |       |       |      |       | 48.37 |      |      | 43.93 |     | 6.20 |    |      |       |     |     |     |       |      |       |       |       |      | 1.50 | 100   | 126          |
| S18    | 23   | 14       | Zrn                 | 31.08  |       |       |       |      |       |       |      |      |       |     |      |    |      |       |     |     |     | 68.92 |      |       |       |       |      |      | 100   | 119          |
| S18    | 23   | 15       | Chr                 |        |       | 7.45  | 23.90 |      | 8.03  |       |      |      |       |     |      |    |      | 60.62 |     |     |     |       |      |       |       |       |      |      | 100   | 108          |
| S18    | 23   | 16       | Dol                 |        |       |       |       |      | 22.70 | 31.30 |      |      |       |     |      |    |      |       |     |     |     |       |      |       |       |       |      |      | 54    | 56           |
| S18    | 23   | 17       | Chl +               | 33.28  | 1.86  | 21.06 | 29.00 |      | 13.46 | 0.28  | 0.62 | 0.44 |       |     |      |    |      |       |     |     |     |       |      |       |       |       |      |      | 100   | 99           |
| S18    | 23   | 18       | Ap                  |        |       |       |       |      | 48.86 |       |      |      | 44.58 |     | 5.07 |    |      |       |     |     |     |       |      |       |       |       |      | 1.49 | 100   | 120          |
| S18    | 23   | 19       | Grt                 | 39.47  |       | 21.05 | 31.76 | 1.08 | 4.26  | 2.38  |      |      |       |     |      |    |      |       |     |     |     |       |      |       |       |       |      |      | 100   | 116          |
| S18    | 23.1 | 1        | Fl                  | 1.04   |       |       | 0.39  | 0.73 | 0.98  | 50.26 |      |      |       |     |      |    |      |       |     |     |     |       |      |       |       |       |      |      | 100   | 114          |
| S18    | 23.1 | 2        | Feohy +             | 6.18   | 1.58  | 2.49  | 86.82 | 0.38 |       | 1.91  |      |      |       |     |      |    | 0.64 |       |     |     |     |       |      |       |       |       |      |      | 100   | 92           |
| S18    | 23.2 | 1        | Chl                 | 31.51  |       | 17.58 | 20.30 | 0.48 | 14.53 |       | 0.43 | 0.17 |       |     |      |    |      |       |     |     |     |       |      |       |       |       |      |      | 85    | 93           |
| S18    | 23.2 | 2        | Qz                  | 100.00 |       |       |       |      |       |       |      |      |       |     |      |    |      |       |     |     |     |       |      |       |       |       |      |      | 100   | 119          |
| S18    | 23.2 | 3        | Ilm                 |        | 52.46 |       | 40.83 | 6.27 | 0.43  |       |      |      |       |     |      |    |      |       |     |     |     |       |      |       |       |       |      |      | 100   | 104          |
| S18    | 24   | 1        | Chl +               | 32.08  | 2.34  | 19.53 | 34.41 | 0.37 | 9.38  | 0.79  | 0.53 | 0.58 |       |     |      |    |      |       |     |     |     |       |      |       |       |       |      |      | 100   | 83           |
| S18    | 24   | 2        | Amph                | 51.65  | 1.13  | 5.93  | 9.10  |      | 17.51 | 10.69 | 1.00 |      |       |     |      |    |      |       |     |     |     |       |      |       |       |       |      |      | 97    | 108          |
| S18    | 24   | 3        | Grt                 | 39.67  |       | 20.86 | 25.37 | 3.31 | 1.31  | 9.47  |      |      |       |     |      |    |      |       |     |     |     |       |      |       |       |       |      |      | 100   | 110          |
| S18    | 24   | 4        | Chl                 | 24.35  |       | 21.52 | 30.64 | 0.25 | 8.24  |       |      |      |       |     |      |    |      |       |     |     |     |       |      |       |       |       |      |      | 85    | 94           |
| S18    | 24   | 5        | Zrn                 | 30.99  |       |       |       |      |       |       |      |      |       |     |      |    |      |       |     |     |     | 67.66 |      |       |       |       | 1.35 |      | 100   | 117          |
| S18    | 24   | 6        | Ttn                 | 32.74  | 37.02 | 1.66  | 0.81  |      |       | 27.77 |      |      |       |     |      |    |      |       |     |     |     |       |      |       |       |       |      |      | 100   | 106          |
| S18    | 24   | 7        | Chl                 | 25.71  |       | 21.30 | 26.21 |      | 11.23 |       | 0.55 |      |       |     |      |    |      |       |     |     |     |       |      |       |       |       |      |      | 85    | 95           |
| S18    | 24   | 8        | Zrn                 | 31.41  |       |       | 0.38  |      |       |       |      |      |       |     |      |    |      |       |     |     |     | 66.73 |      |       |       |       | 1.48 |      | 100   | 118          |
| S18    | 24   | 9        | Spl                 |        |       | 38.69 | 14.43 |      | 16.46 |       |      |      |       |     |      |    |      | 30.42 |     |     |     |       |      |       |       |       |      |      | 100   | 110          |
| S18    | 24   | 10       | Grt                 | 39.23  |       | 21.03 | 29.92 | 3.73 | 3.44  | 2.64  |      |      |       |     |      |    |      |       |     |     |     |       |      |       |       |       |      |      | 100   | 113          |
| S18    | 24   | 11       | Grt                 | 39.44  |       | 20.69 | 27.32 | 2.62 | 0.98  | 8.95  |      |      |       |     |      |    |      |       |     |     |     |       |      |       |       |       |      |      | 100   | 112          |
| S18    | 24   | 12       | Grt                 | 39.34  |       | 20.60 | 34.06 | 0.49 | 1.66  | 3.85  |      |      |       |     |      |    |      |       |     |     |     |       |      |       |       |       |      |      | 100   | 110          |
| S18    | 24   | 13       | ?Margarite (mica) + | 36.19  |       | 44.72 | 0.46  |      |       | 6.81  | 1.83 | 3.60 |       |     | 1.40 |    |      |       |     |     |     |       |      |       |       |       |      |      | 95    | 104          |
| S18    | 24   | 14       | Grt                 | 41.39  | 0.66  | 18.14 | 5.46  |      | 0.44  | 33.91 |      |      |       |     |      |    |      |       |     |     |     |       |      |       |       |       |      |      | 100   | 109          |
| S18    | 24   | 15       | Grt                 | 39.01  |       | 20.75 | 31.92 | 4.54 | 2.49  | 1.29  |      |      |       |     |      |    |      |       |     |     |     |       |      |       |       |       |      |      | 100   | 109          |
| S18    | 24   | 16       | Dol                 |        |       |       |       |      | 22.53 | 31.47 |      |      |       |     |      |    |      |       |     |     |     |       |      |       |       |       |      |      | 54    | 56           |
| S18    | 24   | 17       | Ttn                 | 32.76  | 38.09 | 0.83  | 0.44  |      |       | 27.88 |      |      |       |     |      |    |      |       |     |     |     |       |      |       |       |       |      |      | 100   | 109          |
| S18    | 24   | 18       | Ap                  |        |       |       |       | 0.44 |       | 49.02 |      |      | 44.59 |     | 5.95 |    |      |       |     |     |     |       |      |       |       |       |      |      | 100   | 121          |
| S18    | 24   | 19       | Tur                 | 38.11  | 1.11  | 30.52 | 8.38  |      | 5.99  | 0.49  | 2.41 |      |       |     |      |    |      |       |     |     |     |       |      |       |       |       |      |      | 87    | 100          |
| S18    | 24   | 20       | Grt                 | 39.51  |       | 20.99 | 29.11 | 1.54 | 1.59  | 7.26  |      |      |       |     |      |    |      |       |     |     |     |       |      |       |       |       |      |      | 100   | 113          |
| S18    | 24   | 21       | Kfs                 | 57.42  |       | 27.45 | 2.01  |      | 0.75  | 0.55  | 4.69 | 7.13 |       |     |      |    |      |       |     |     |     |       |      |       |       |       |      |      | 100   | 114          |
| S18    | 24   | 22       | Ep                  | 40.86  |       | 23.03 | 10.96 |      |       | 21.85 | 0.30 |      |       |     |      |    |      |       |     |     |     |       |      |       |       |       |      |      | 97    | 104          |
| S18    | 25   | 1        | Chr                 |        |       | 15.30 | 18.80 |      | 11.39 |       |      |      |       |     |      |    | 0.45 | 54.05 |     |     |     |       |      |       |       |       |      |      | 100   | 107          |
| S18    | 25   | 2        | Chr                 |        | 3.19  | 17.53 | 25.82 |      | 12.41 |       |      |      |       |     |      |    |      | 41.06 |     |     |     |       |      |       |       |       |      |      | 100   | 108          |
| S18    | 25   | 3        | Chl                 | 24.95  |       | 21.24 | 30.55 |      | 8.26  |       |      |      |       |     |      |    |      |       |     |     |     |       |      |       |       |       |      |      | 85    | 97           |
| S18    | 25   | 4        | Ttn                 | 32.96  | 37.34 | 1.69  |       |      |       | 28.01 |      |      |       |     |      |    |      |       |     |     |     |       |      |       |       |       |      |      | 100   | 110          |
| S18    | 25   | 5        | Grt                 | 39.16  |       | 20.51 | 28.23 | 6.76 | 3.50  | 1.84  |      |      |       |     |      |    |      |       |     |     |     |       |      |       |       |       |      |      | 100   | 109          |
| S18    | 25   | 6        | Chl + Ap +          | 27.28  |       | 16.02 | 22.22 |      | 5.31  | 14.42 |      | 0.77 | 13.98 |     |      |    |      |       |     |     |     |       |      |       |       |       |      |      | 100   | 99           |
| S18    | 25   | 7        | Ms + Chl            | 56.36  |       | 24.18 | 6.89  |      | 5.64  | 0.59  | 0.54 | 5.80 |       |     |      |    |      |       |     |     |     |       |      |       |       |       |      |      | 100   | 100          |
| S18    | 25   | 8        | Chl                 | 25.30  |       | 20.60 | 29.56 |      | 9.54  |       |      |      |       |     |      |    |      |       |     |     |     |       |      |       |       |       |      |      | 85    | 94           |
| S18    | 25   | 9        | Grt                 | 39.92  |       | 21.05 | 28.16 | 0.99 | 3.53  | 6.36  |      |      |       |     |      |    |      |       |     |     |     |       |      |       |       |       |      |      | 100   | 109          |
| S18    | 25   | 10       | Ep                  | 39.79  | 0.34  | 22.83 | 11.01 |      |       | 22.35 |      |      |       |     |      |    | 0.68 |       |     |     |     |       |      |       |       |       |      |      | 97    | 107          |
| S18    | 25   | 11       | Chl                 | 31.00  |       | 18.28 | 9.97  |      | 25.44 | 0.31  |      |      |       |     |      |    |      |       |     |     |     |       |      |       |       |       |      |      | 85    | 95           |



Table B10.2: EDS analyses of sample S18

| Sample | Site | Position | Mineral | SiO2  | TiO2  | Al2O3 | FeO   | MnO  | MgO   | CaO   | Na2O  | K2O   | P2O5 | SO3 | F | Cl | V2O5 | Cr2O3 | NiO | CuO | ZnO  | ZrO2  | Ag2O | La2O3 | Ce2O3 | Nd2O3 | HfO2 | WO3 | Total | Actual Total |
|--------|------|----------|---------|-------|-------|-------|-------|------|-------|-------|-------|-------|------|-----|---|----|------|-------|-----|-----|------|-------|------|-------|-------|-------|------|-----|-------|--------------|
| S18    | 25   | 12       | Chl     | 25.25 |       | 21.29 | 25.21 | 0.40 | 12.85 |       |       |       |      |     |   |    |      |       |     |     |      |       |      |       |       |       |      |     | 85    | 97           |
| S18    | 25   | 13       | Qz      | 99.80 |       |       | 0.20  |      |       |       |       |       |      |     |   |    |      |       |     |     |      |       |      |       |       |       |      |     | 100   | 120          |
| S18    | 25   | 14       | Chl     | 28.99 | 1.39  | 19.88 | 24.31 |      | 10.04 |       | 0.39  |       |      |     |   |    |      |       |     |     |      |       |      |       |       |       |      |     | 85    | 96           |
| S18    | 25   | 15       | Grt     | 39.80 |       | 20.79 | 27.45 | 1.65 | 2.42  | 7.90  |       |       |      |     |   |    |      |       |     |     |      |       |      |       |       |       |      |     | 100   | 112          |
| S18    | 25   | 16       | Chl     | 25.71 |       | 21.53 | 26.83 | 0.30 | 10.63 |       |       |       |      |     |   |    |      |       |     |     |      |       |      |       |       |       |      |     | 85    | 99           |
| S18    | 25   | 17       | Spl     |       |       | 30.83 | 14.78 |      | 15.44 |       |       |       |      |     |   |    |      | 38.95 |     |     |      |       |      |       |       |       |      |     | 100   | 111          |
| S18    | 25   | 18       | Chl     | 26.62 |       | 21.78 | 21.54 |      | 15.06 |       |       |       |      |     |   |    |      |       |     |     |      |       |      |       |       |       |      |     | 85    | 100          |
| S18    | 25   | 19       | Chl     | 27.42 |       | 18.92 | 22.14 | 0.27 | 15.91 |       | 0.34  |       |      |     |   |    |      |       |     |     |      |       |      |       |       |       |      |     | 85    | 100          |
| S18    | 25   | 20       | Grt     | 39.37 |       | 20.94 | 31.41 | 2.35 | 4.55  | 1.38  |       |       |      |     |   |    |      |       |     |     |      |       |      |       |       |       |      |     | 100   | 111          |
| S18    | 25   | 21       | Chr     |       |       | 26.86 | 17.10 |      | 14.09 |       |       |       |      |     |   |    |      | 41.95 |     |     |      |       |      |       |       |       |      |     | 100   | 108          |
| S18    | 25   | 22       | Zrn     | 31.32 |       |       |       |      |       |       |       |       |      |     |   |    |      |       |     |     |      | 68.68 |      |       |       |       |      |     | 100   | 115          |
| S18    | 25.1 | 1        | Ep      | 38.85 |       | 20.90 | 13.74 | 0.32 | 4.33  | 18.87 |       |       |      |     |   |    |      |       |     |     |      |       |      |       |       |       |      |     | 97    | 102          |
| S18    | 25.1 | 2        | Ep      | 39.78 |       | 20.98 | 13.73 |      |       | 22.51 |       |       |      |     |   |    |      |       |     |     |      |       |      |       |       |       |      |     | 97    | 108          |
| S18    | 25.1 | 3        | Ab      | 67.45 |       | 18.59 | 0.79  |      |       | 1.78  | 11.39 |       |      |     |   |    |      |       |     |     |      |       |      |       |       |       |      |     | 100   | 116          |
| S18    | 25.1 | 4        | TiO2    |       | 99.44 |       | 0.56  |      |       |       |       |       |      |     |   |    |      |       |     |     |      |       |      |       |       |       |      |     | 100   | 107          |
| S18    | 25.1 | 5        | Ab      | 66.38 |       | 21.10 | 0.27  |      |       | 1.75  | 10.01 | 0.49  |      |     |   |    |      |       |     |     |      |       |      |       |       |       |      |     | 100   | 118          |
| S18    | 26   | 1        | Chr     |       |       | 16.57 | 17.90 |      | 11.97 |       |       |       |      |     |   |    |      | 53.57 |     |     |      |       |      |       |       |       |      |     | 100   | 115          |
| S18    | 26   | 2        | Ilm     |       | 45.25 |       | 47.93 | 1.05 | 5.77  |       |       |       |      |     |   |    |      |       |     |     |      |       |      |       |       |       |      |     | 100   | 108          |
| S18    | 26   | 3        | Chr     |       |       | 18.29 | 18.62 |      | 12.43 |       |       |       |      |     |   |    | 0.40 | 50.25 |     |     |      |       |      |       |       |       |      |     | 100   | 114          |
| S18    | 26   | 4        | Tur     | 38.25 | 0.69  | 30.71 | 5.86  |      | 8.15  | 1.17  | 2.17  |       |      |     |   |    |      |       |     |     |      |       |      |       |       |       |      |     | 87    | 104          |
| S18    | 26   | 5        | Ep      | 40.26 |       | 25.67 | 8.52  |      |       | 22.55 |       |       |      |     |   |    |      |       |     |     |      |       |      |       |       |       |      |     | 97    | 116          |
| S18    | 26   | 6        | Ep      | 40.52 |       | 25.47 | 8.07  |      |       | 22.63 |       |       |      |     |   |    |      | 0.31  |     |     |      |       |      |       |       |       |      |     | 97    | 116          |
| S18    | 26   | 7        | Ep      | 40.19 |       | 24.98 | 9.16  |      |       | 22.68 |       |       |      |     |   |    |      |       |     |     |      |       |      |       |       |       |      |     | 97    | 115          |
| S18    | 26   | 8        | TiO2    |       | 99.65 |       | 0.35  |      |       |       |       |       |      |     |   |    |      |       |     |     |      |       |      |       |       |       |      |     | 100   | 116          |
| S18    | 26   | 9        | Grt     | 39.22 |       | 20.66 | 36.75 |      | 2.76  | 0.60  |       |       |      |     |   |    |      |       |     |     |      |       |      |       |       |       |      |     | 100   | 123          |
| S18    | 26   | 10       | Ep      | 40.50 |       | 27.88 | 5.78  |      |       | 22.84 |       |       |      |     |   |    |      |       |     |     |      |       |      |       |       |       |      |     | 97    | 119          |
| S18    | 26   | 11       | Qz      | 99.75 |       |       | 0.25  |      |       |       |       |       |      |     |   |    |      |       |     |     |      |       |      |       |       |       |      |     | 100   | 130          |
| S18    | 26   | 12       | Chl     | 29.38 |       | 19.83 | 13.85 |      | 21.10 | 0.44  | 0.40  |       |      |     |   |    |      |       |     |     |      |       |      |       |       |       |      |     | 85    | 107          |
| S18    | 26   | 13       | Ep      | 39.78 |       | 23.40 | 11.24 |      |       | 22.57 |       |       |      |     |   |    |      |       |     |     |      |       |      |       |       |       |      |     | 97    | 118          |
| S18    | 26   | 14       | Tur     | 38.28 | 0.82  | 30.26 | 7.10  |      | 7.46  | 0.40  | 2.69  |       |      |     |   |    |      |       |     |     |      |       |      |       |       |       |      |     | 87    | 107          |
| S18    | 26   | 15       | Chr     |       |       | 14.99 | 18.50 |      | 11.80 |       |       |       |      |     |   |    |      | 54.72 |     |     |      |       |      |       |       |       |      |     | 100   | 117          |
| S18    | 26   | 16       | Chr +   | 4.39  | 0.82  | 5.04  | 43.52 | 4.32 | 3.87  | 0.31  |       |       |      |     |   |    |      | 35.95 |     |     | 1.77 |       |      |       |       |       |      |     | 100   | 109          |
| S18    | 26   | 17       | Chl     | 25.97 |       | 20.94 | 26.14 |      | 11.96 |       |       |       |      |     |   |    |      |       |     |     |      |       |      |       |       |       |      |     | 85    | 107          |
| S18    | 26   | 18       | Ep      | 39.51 |       | 21.60 | 12.50 |      |       | 22.51 |       |       |      |     |   |    |      | 0.87  |     |     |      |       |      |       |       |       |      |     | 97    | 119          |
| S18    | 26   | 19       | Grt     | 39.76 |       | 20.75 | 29.26 |      | 1.79  | 8.45  |       |       |      |     |   |    |      |       |     |     |      |       |      |       |       |       |      |     | 100   | 121          |
| S18    | 26.1 | 1        | Qz      | 99.73 |       |       | 0.27  |      |       |       |       |       |      |     |   |    |      |       |     |     |      |       |      |       |       |       |      |     | 100   | 129          |
| S18    | 26.1 | 2        | Ep      | 40.27 |       | 24.04 | 10.33 |      |       | 22.36 |       |       |      |     |   |    |      |       |     |     |      |       |      |       |       |       |      |     | 97    | 117          |
| S18    | 26.1 | 3        | Chl     | 28.73 |       | 18.63 | 17.22 | 0.46 | 19.71 | 0.25  |       |       |      |     |   |    |      |       |     |     |      |       |      |       |       |       |      |     | 85    | 107          |
| S18    | 26.1 | 4        | "Mag" + | 4.00  |       |       | 95.00 |      |       |       |       |       | 1.01 |     |   |    |      |       |     |     |      |       |      |       |       |       |      |     | 100   | 88           |
| S18    | 26.1 | 5        | Qz      | 97.51 | 0.21  | 0.99  | 1.29  |      |       |       |       |       |      |     |   |    |      |       |     |     |      |       |      |       |       |       |      |     | 100   | 129          |
| S18    | 27   | 1        | Chr     |       |       | 26.24 | 19.40 |      | 12.77 |       |       |       |      |     |   |    |      | 41.59 |     |     |      |       |      |       |       |       |      |     | 100   | 115          |
| S18    | 27   | 2        | Tur     | 38.47 | 0.95  | 33.47 | 5.53  |      | 6.25  | 0.39  | 1.95  |       |      |     |   |    |      |       |     |     |      |       |      |       |       |       |      |     | 87    | 103          |
| S18    | 27   | 3        | Chl     | 27.75 | 0.25  | 22.09 | 21.73 | 0.30 | 12.58 |       | 0.31  |       |      |     |   |    |      |       |     |     |      |       |      |       |       |       |      |     | 85    | 105          |
| S18    | 27   | 4        | Chl     | 26.84 | 0.22  | 19.20 | 24.21 | 0.27 | 14.26 |       |       |       |      |     |   |    |      |       |     |     |      |       |      |       |       |       |      |     | 85    | 105          |
| S18    | 27   | 5        | Pg      | 50.73 |       | 40.27 | 0.54  |      |       |       | 8.07  | 0.40  |      |     |   |    |      |       |     |     |      |       |      |       |       |       |      |     | 100   | 116          |
| S18    | 27   | 6        | Grt     | 39.29 |       | 20.99 | 33.33 | 0.67 | 3.24  | 2.48  |       |       |      |     |   |    |      |       |     |     |      |       |      |       |       |       |      |     | 100   | 121          |
| S18    | 27   | 7        | Ms      | 51.92 | 0.42  | 24.16 | 4.49  |      |       | 3.38  |       | 10.63 |      |     |   |    |      |       |     |     |      |       |      |       |       |       |      |     | 95    | 114          |
| S18    | 27   | 8        | Dol     |       |       |       |       |      | 22.35 | 31.65 |       |       |      |     |   |    |      |       |     |     |      |       |      |       |       |       |      |     | 54    | 60           |

Table B10.2: EDS analyses of sample S18

| Sample | Site | Position | Mineral | SiO2  | TiO2  | Al2O3 | FeO   | MnO  | MgO   | CaO   | Na2O | K2O  | P2O5  | SO3  | F    | Cl | V2O5 | Cr2O3 | NiO | CuO | ZnO | ZrO2  | Ag2O | La2O3 | Ce2O3 | Nd2O3 | HfO2 | WO3  | Total | Actual Total |
|--------|------|----------|---------|-------|-------|-------|-------|------|-------|-------|------|------|-------|------|------|----|------|-------|-----|-----|-----|-------|------|-------|-------|-------|------|------|-------|--------------|
| S18    | 27   | 9        | Dol     |       |       |       |       |      | 22.42 | 31.58 |      |      |       |      |      |    |      |       |     |     |     |       |      |       |       |       |      |      | 54    | 61           |
| S18    | 27   | 10       | Grt     | 39.62 |       | 21.00 | 33.63 | 1.09 | 3.75  | 0.91  |      |      |       |      |      |    |      |       |     |     |     |       |      |       |       |       |      |      | 100   | 122          |
| S18    | 27   | 11       | Chl     | 26.07 |       | 20.75 | 25.88 |      | 11.95 |       | 0.35 |      |       |      |      |    |      |       |     |     |     |       |      |       |       |       |      |      | 85    | 103          |
| S18    | 27   | 12       | Ep      | 41.08 |       | 22.94 | 11.63 |      | 1.62  | 19.74 |      |      |       |      |      |    |      |       |     |     |     |       |      |       |       |       |      |      | 97    | 117          |
| S18    | 27   | 13       | Tur     | 36.43 | 1.37  | 33.15 | 7.80  |      | 5.06  | 1.62  | 1.26 |      |       |      |      |    |      | 0.31  |     |     |     |       |      |       |       |       |      |      | 87    | 107          |
| S18    | 27   | 14       | Tur     | 38.06 |       | 29.96 | 1.71  |      | 11.56 |       | 3.11 |      |       |      | 2.60 |    |      |       |     |     |     |       |      |       |       |       |      |      | 87    | 115          |
| S18    | 27   | 15       | Ttn     | 33.15 | 36.18 | 1.36  | 1.63  |      |       | 27.68 |      |      |       |      |      |    |      |       |     |     |     |       |      |       |       |       |      |      | 100   | 118          |
| S18    | 27   | 16       | Grt     | 39.75 |       | 20.98 | 28.14 | 1.29 | 2.69  | 7.15  |      |      |       |      |      |    |      |       |     |     |     |       |      |       |       |       |      |      | 100   | 124          |
| S18    | 27   | 17       | Grt     | 39.55 |       | 20.83 | 32.43 | 1.05 | 3.99  | 2.15  |      |      |       |      |      |    |      |       |     |     |     |       |      |       |       |       |      |      | 100   | 124          |
| S18    | 27   | 18       | Grt     | 39.44 |       | 21.11 | 33.58 | 1.05 | 3.78  | 1.04  |      |      |       |      |      |    |      |       |     |     |     |       |      |       |       |       |      |      | 100   | 121          |
| S18    | 27   | 19       | Ap      | 0.61  |       |       |       |      |       | 48.91 |      |      | 43.08 | 1.05 | 4.78 |    |      |       |     |     |     |       |      |       |       |       |      | 1.58 | 100   | 129          |
| S18    | 28   | 1        | Ep      | 40.77 | 0.45  | 18.86 | 15.08 |      |       | 21.83 |      |      |       |      |      |    |      |       |     |     |     |       |      |       |       |       |      |      | 97    | 113          |
| S18    | 28   | 2        | Ap      |       |       |       |       |      |       | 48.31 |      |      | 44.01 |      | 6.04 |    |      |       |     |     |     |       |      |       |       |       |      | 1.64 | 100   | 135          |
| S18    | 28   | 3        | Chr     |       |       | 23.69 | 16.87 |      | 14.29 |       |      |      |       |      |      |    |      | 45.15 |     |     |     |       |      |       |       |       |      |      | 100   | 118          |
| S18    | 28   | 4        | Kfs +   | 69.25 | 0.43  | 16.15 | 4.48  |      | 1.77  | 0.34  | 2.82 | 4.54 |       |      |      |    |      | 0.23  |     |     |     |       |      |       |       |       |      |      | 100   | 121          |
| S18    | 28   | 5        | Chl     | 25.47 |       | 21.20 | 26.25 | 0.24 | 11.84 |       |      |      |       |      |      |    |      |       |     |     |     |       |      |       |       |       |      |      | 85    | 105          |
| S18    | 28   | 6        | Amph    | 44.31 | 2.84  | 10.58 | 11.12 |      | 14.72 | 10.63 | 2.40 | 0.39 |       |      |      |    |      |       |     |     |     |       |      |       |       |       |      |      | 97    | 121          |
| S18    | 28   | 7        | Ilm     |       | 45.33 |       | 50.24 | 1.57 | 2.86  |       |      |      |       |      |      |    |      |       |     |     |     |       |      |       |       |       |      |      | 100   | 108          |
| S18    | 28   | 8        | Tur     | 39.39 |       | 32.01 | 3.74  |      | 9.13  |       | 2.73 |      |       |      |      |    |      |       |     |     |     |       |      |       |       |       |      |      | 87    | 107          |
| S18    | 28   | 9        | Ep      | 39.97 |       | 25.33 | 8.82  | 0.45 |       | 22.44 |      |      |       |      |      |    |      |       |     |     |     |       |      |       |       |       |      |      | 97    | 117          |
| S18    | 28   | 10       | Grt     | 40.51 |       | 21.16 | 24.76 | 0.45 | 4.64  | 8.49  |      |      |       |      |      |    |      |       |     |     |     |       |      |       |       |       |      |      | 100   | 121          |
| S18    | 28   | 11       | TiO2 +  | 4.38  | 89.96 | 2.59  | 2.37  |      | 0.47  | 0.24  |      |      |       |      |      |    |      |       |     |     |     |       |      |       |       |       |      |      | 100   | 106          |
| S18    | 28   | 12       | Chr     |       | 0.50  | 19.30 | 23.13 |      | 11.57 |       |      |      |       |      |      |    |      | 45.50 |     |     |     |       |      |       |       |       |      |      | 100   | 115          |
| S18    | 28   | 13       | Hbl     | 48.90 | 0.99  | 9.39  | 9.93  | 0.24 | 14.71 | 10.80 | 1.72 | 0.32 |       |      |      |    |      |       |     |     |     |       |      |       |       |       |      |      | 97    | 122          |
| S18    | 28   | 14       | Zrn     | 31.35 |       |       |       |      |       |       |      |      |       |      |      |    |      |       |     |     |     | 68.65 |      |       |       |       |      |      | 100   | 127          |
| S18    | 28   | 15       | TiO2    |       | 99.53 |       | 0.47  |      |       |       |      |      |       |      |      |    |      |       |     |     |     |       |      |       |       |       |      |      | 100   | 118          |
| S18    | 28   | 16       | TiO2    |       | 99.63 |       | 0.37  |      |       |       |      |      |       |      |      |    |      |       |     |     |     |       |      |       |       |       |      |      | 100   | 119          |
| S18    | 28   | 17       | Grt     | 39.48 | 0.34  | 20.92 | 28.77 | 1.20 | 2.32  | 6.97  |      |      |       |      |      |    |      |       |     |     |     |       |      |       |       |       |      |      | 100   | 125          |
| S18    | 28   | 18       | Chr     |       |       | 21.28 | 19.41 |      | 12.65 |       |      |      |       |      |      |    |      | 46.66 |     |     |     |       |      |       |       |       |      |      | 100   | 120          |
| S18    | 28   | 19       | Tur     | 37.92 | 0.90  | 32.93 | 5.84  |      | 6.83  | 0.44  | 2.14 |      |       |      |      |    |      |       |     |     |     |       |      |       |       |       |      |      | 87    | 110          |
| S18    | 28   | 20       | Grt     | 39.04 |       | 20.89 | 34.32 | 0.30 | 2.72  | 2.74  |      |      |       |      |      |    |      |       |     |     |     |       |      |       |       |       |      |      | 100   | 123          |
| S18    | 28   | 21       | Grt     | 39.57 |       | 21.33 | 26.55 | 1.58 | 2.99  | 7.97  |      |      |       |      |      |    |      |       |     |     |     |       |      |       |       |       |      |      | 100   | 124          |

Table B10.2: EDS analyses of sample S18

| Sample | Site | Position                                      | Mineral | SiO2  | TiO2 | Al2O3 | FeO   | MnO   | MgO   | CaO  | Na2O | K2O | P2O5 | SO3 | F | Cl | V2O5 | Cr2O3 | NiO | CuO | ZnO | ZrO2 | Ag2O | La2O3 | Ce2O3 | Nd2O3 | HfO2 | WO3 | Total | Actual Total |
|--------|------|-----------------------------------------------|---------|-------|------|-------|-------|-------|-------|------|------|-----|------|-----|---|----|------|-------|-----|-----|-----|------|------|-------|-------|-------|------|-----|-------|--------------|
| S18    | 28   | 22                                            | Grt     | 39.51 |      | 21.14 | 30.59 | 2.26  | 3.80  | 2.71 |      |     |      |     |   |    |      |       |     |     |     |      |      |       |       |       |      |     | 100   | 123          |
| S18    | 28   | 23                                            | Chl     | 27.04 |      | 18.82 | 24.60 | 0.71  | 13.83 |      |      |     |      |     |   |    |      |       |     |     |     |      |      |       |       |       |      |     | 85    | 106          |
| S18    | 28   | 24                                            | Grt     | 38.99 |      | 20.74 | 6.21  | 28.16 |       | 5.91 |      |     |      |     |   |    |      |       |     |     |     |      |      |       |       |       |      |     | 100   | 121          |
|        |      |                                               |         |       |      |       |       |       |       |      |      |     |      |     |   |    |      |       |     |     |     |      |      |       |       |       |      |     |       |              |
|        |      | Notes                                         |         |       |      |       |       |       |       |      |      |     |      |     |   |    |      |       |     |     |     |      |      |       |       |       |      |     |       |              |
|        |      | + = indicates that other minerals are present |         |       |      |       |       |       |       |      |      |     |      |     |   |    |      |       |     |     |     |      |      |       |       |       |      |     |       |              |
|        |      |                                               |         |       |      |       |       |       |       |      |      |     |      |     |   |    |      |       |     |     |     |      |      |       |       |       |      |     |       |              |
|        |      |                                               |         |       |      |       |       |       |       |      |      |     |      |     |   |    |      |       |     |     |     |      |      |       |       |       |      |     |       |              |
|        |      |                                               |         |       |      |       |       |       |       |      |      |     |      |     |   |    |      |       |     |     |     |      |      |       |       |       |      |     |       |              |

B11: SEM-BSE images and EDS  
mineral analyses for sample S22.

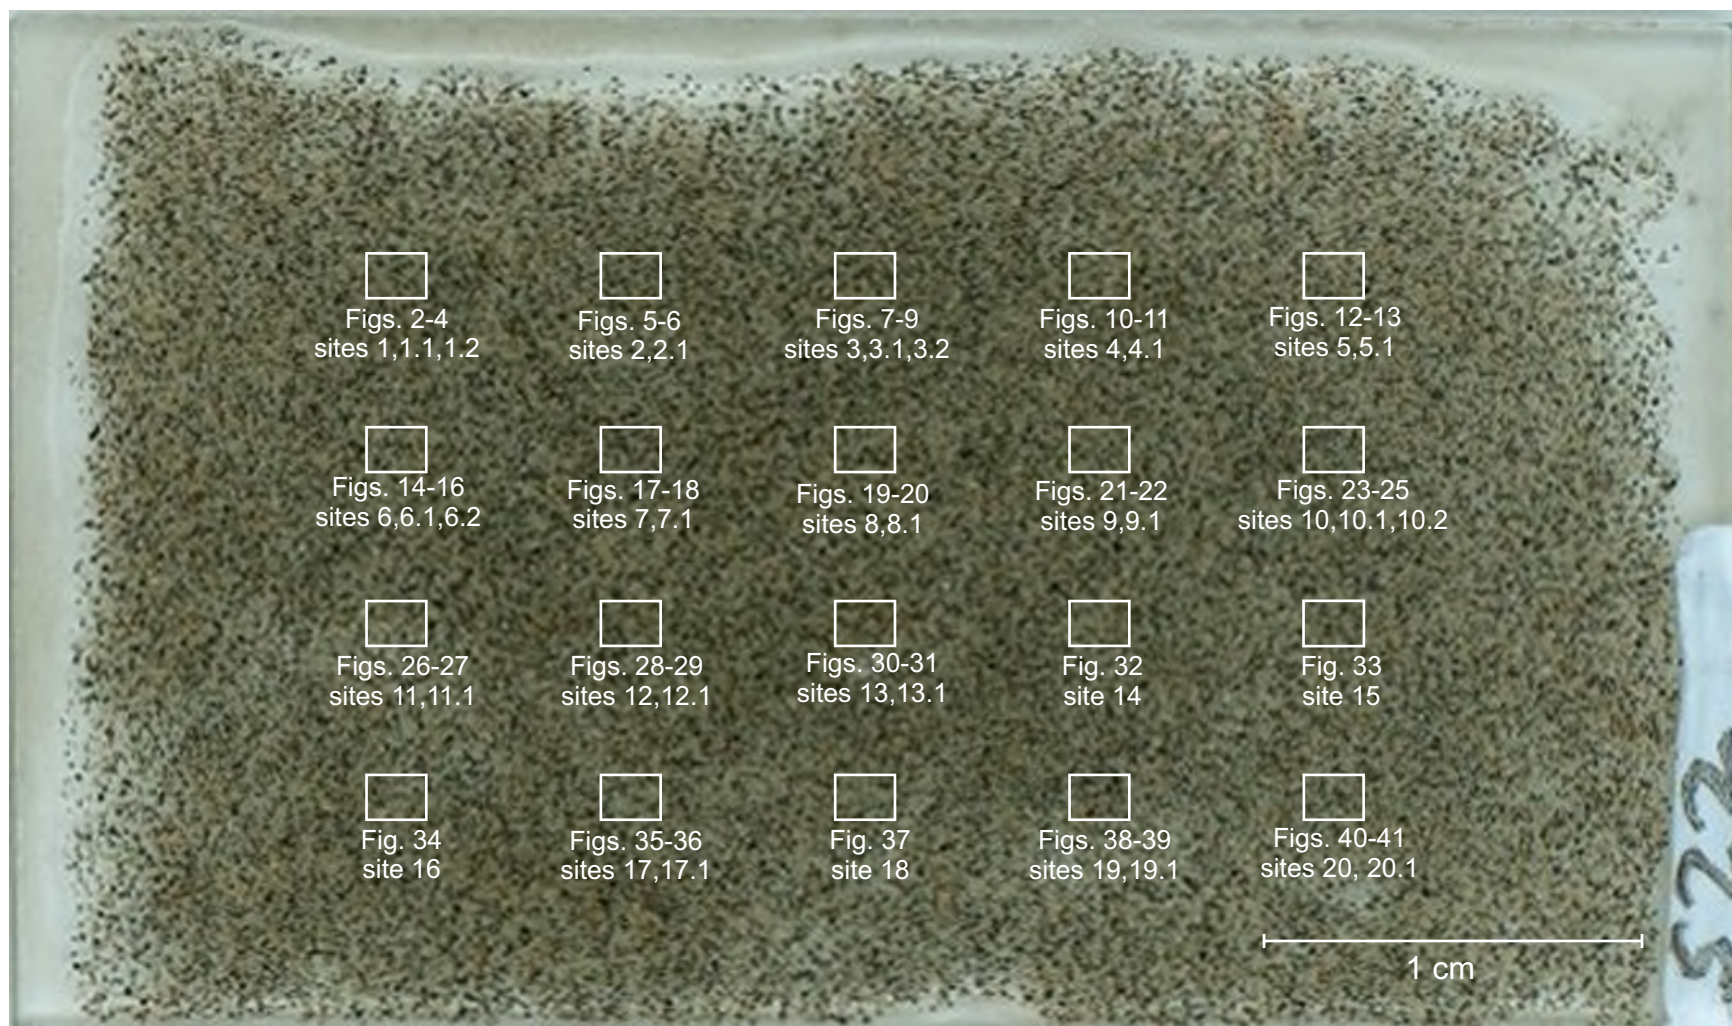

Figure B11.1: Sample S22



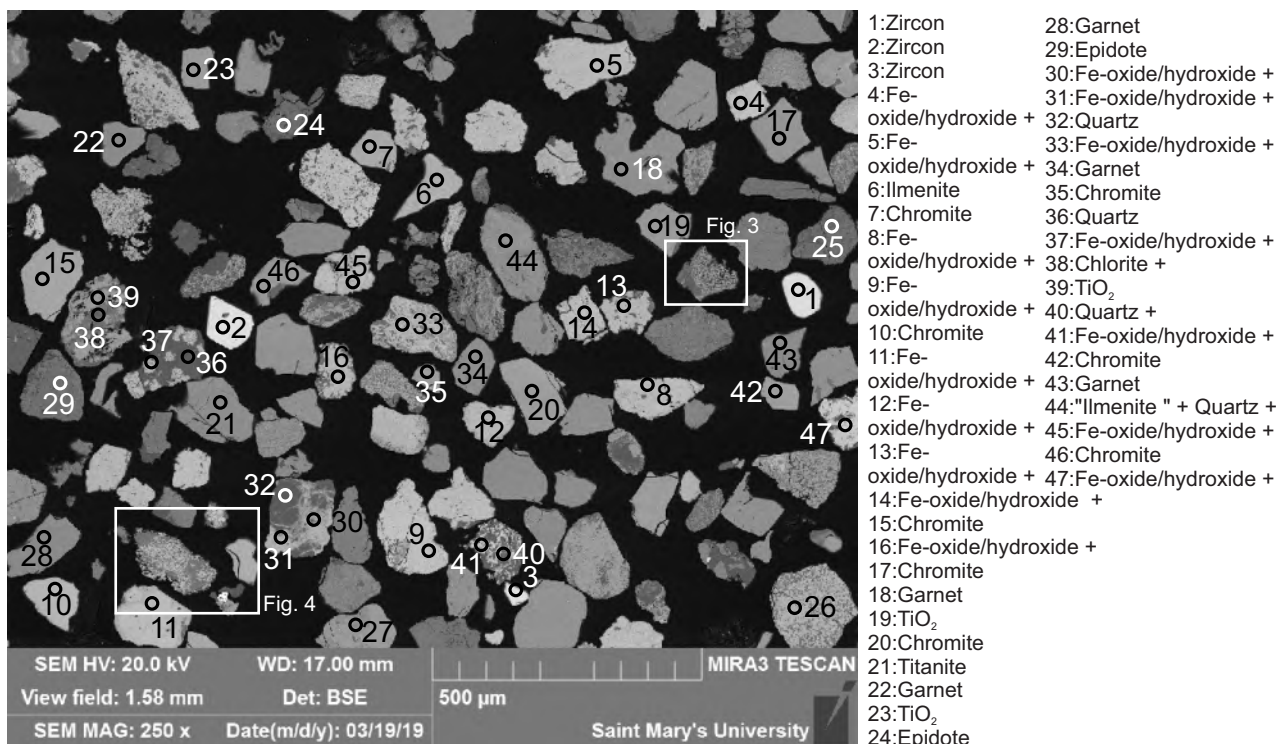

Figure B11.2: Sample S22 site 1 (SEM). The detrital minerals include: Fe-oxide/hydroxide, Ilm, TiO<sub>2</sub>, Chr, Grt, Ep, Ttn, Zrn, Mnz, Pl (Byt), Ab, Ms, Qz, Cal, Chl and Py.

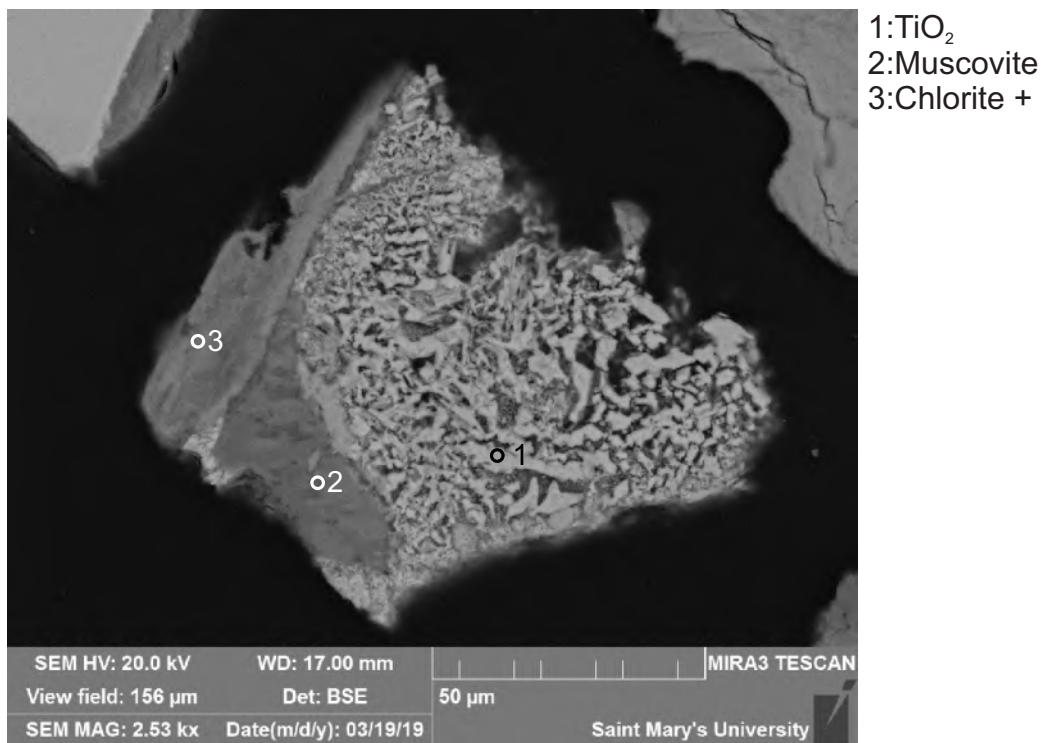

Figure B11.3: Sample S22 site 1.1 (SEM). Probably a lithic clast made up of muscovite + chlorite + spongy TiO<sub>2</sub>, cf. Fig. B10.20. Retrograde metamorphic.

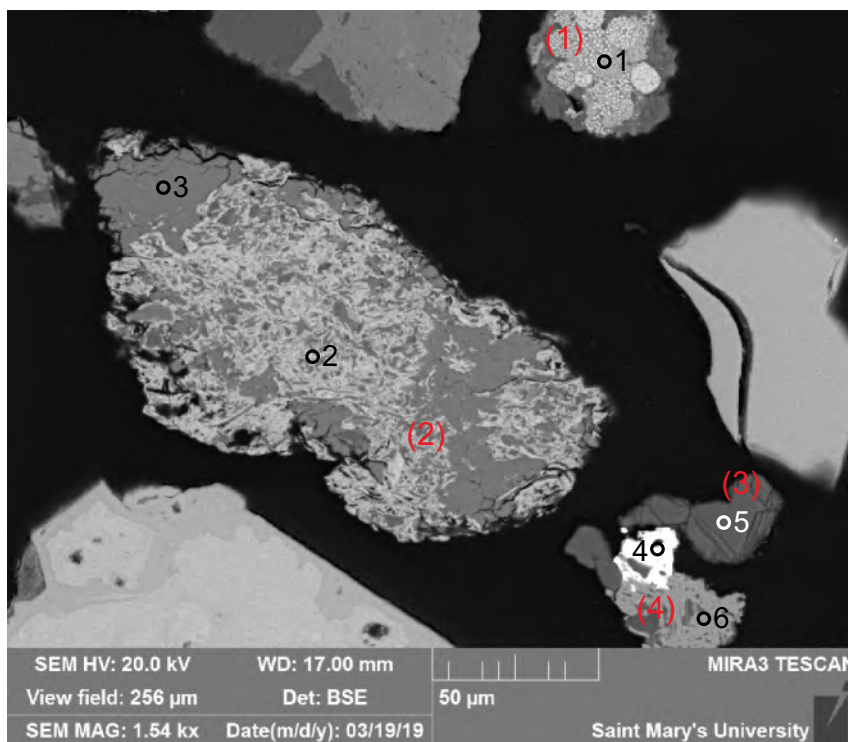

- 1:Pyrite + Chlorite
- 2:Fe-oxide/hydroxide +
- 3:Calcite
- 4:Monazite
- 5:Albite
- 6:TiO<sub>2</sub> +

Figure B11.4: Sample S22 site 1.2 (SEM). 1: Pyrite framboids, probably diagenetic. 2: Lithic clast (calcite + Fe-oxide/hydroxide, sedimentary). 3: Detrital albite. 4: Lithic clast (monazite + TiO<sub>2</sub>, not interpreted).

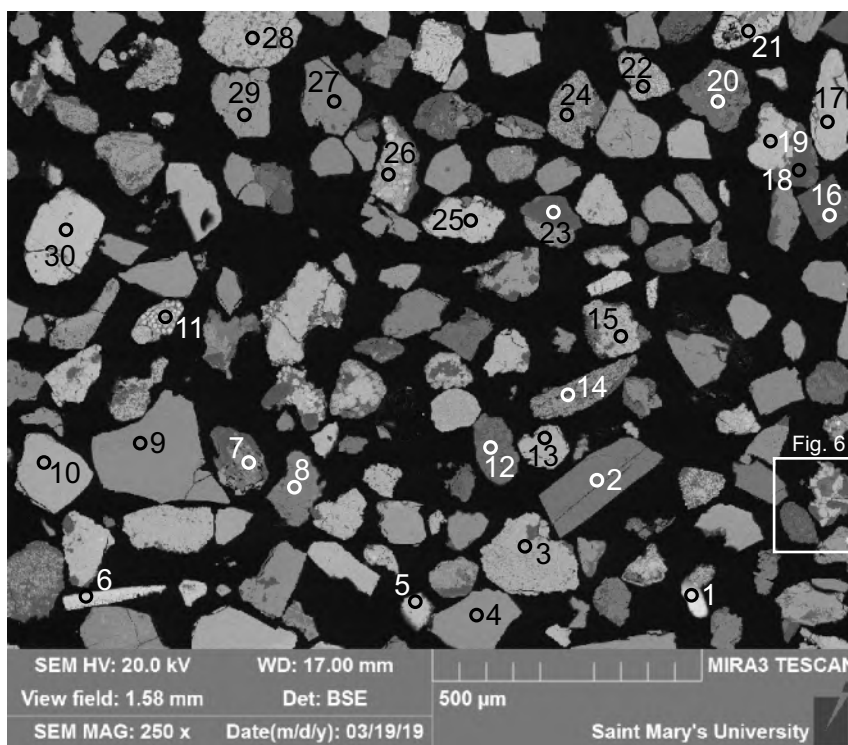

- 1:Zircon
- 2:Mix
- 3:Fe-oxide/hydroxide +
- 4:Garnet
- 5:Fe-Chromite
- 6:Fe-oxide/hydroxide
- 7:Titanite
- 8:Epidote
- 9:Garnet
- 10:Chromite
- 11:Pyrite + Chlorite
- 12:Epidote +
- 13:Chromite
- 14:TiO<sub>2</sub> + Chlorite
- 15:Mix
- 16:Tourmaline
- 17:Fe-oxide/hydroxide +
- 18:Quartz
- 19:Fe-oxide/hydroxide +
- 20:Epidote
- 21:Fe-oxide/hydroxide +
- 22:Chlorite + Fe-oxide/hydroxide
- 23:Quartz
- 24:Chlorite + Fe-oxide/hydroxide
- 25:Fe-oxide/hydroxide +
- 26:Fe-oxide/hydroxide +
- 27:Mix
- 28:Fe-oxide/hydroxide +
- 29:TiO<sub>2</sub>
- 30:Fe-oxide/hydroxide +

Figure B11.5: Sample S22 site 2 (SEM). The detrital minerals include: Fe-oxide/hydroxide, TiO<sub>2</sub>, Chr, Fe-Chr, Grt, Tur, Ep, Ttn, Zrn, Ab, Kfs, Ms, Qz, Chl and Py.

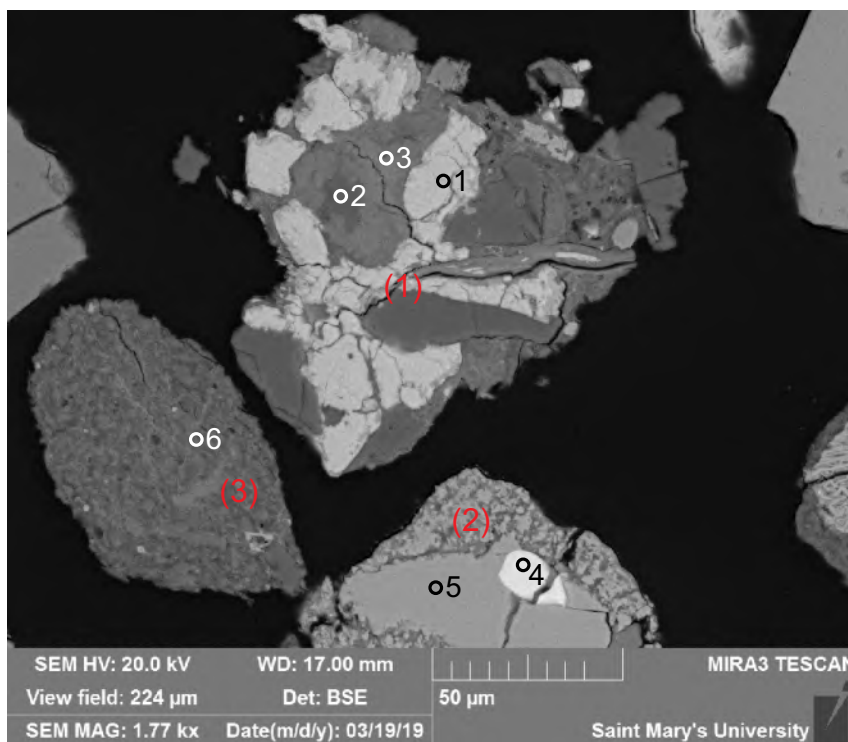

- 1:Fe-oxide/hydroxide +
- 2:Albite
- 3:K-Feldspar
- 4:Zircon
- 5:TiO<sub>2</sub>
- 6:Quartz + Muscovite +

Figure B11.6: Sample S22 site 2.1 (SEM). 1: Lithic clast (K-feldspar + albite + Fe-oxide/hydroxide, igneous). 2: Lithic clast (TiO<sub>2</sub> + zircon inclusion, igneous). 3: Lithic clast (quartz + muscovite, siltstone).

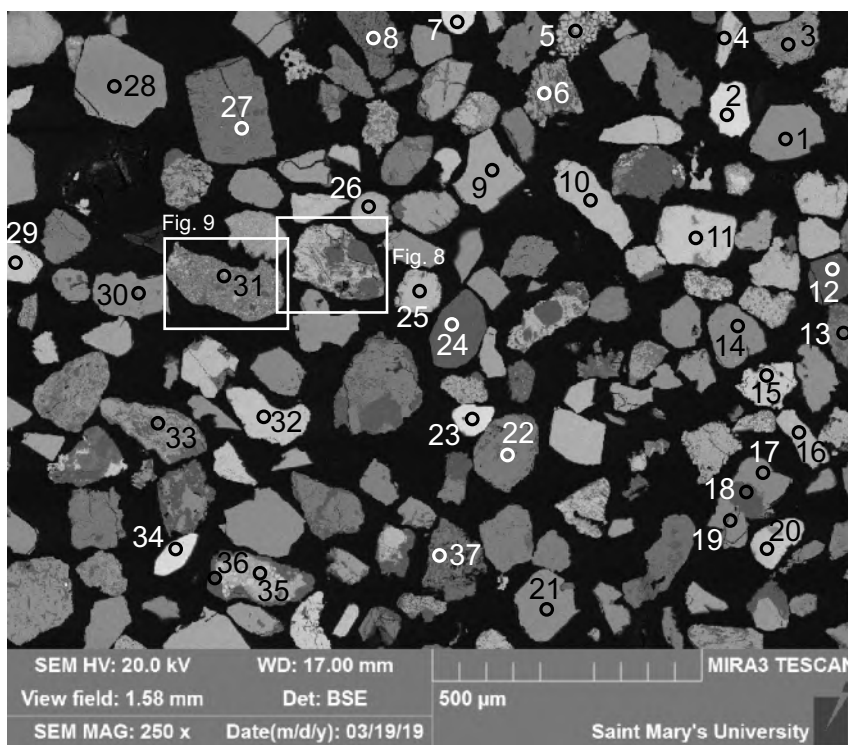

- 1:Garnet
- 2:Zircon
- 3:TiO<sub>2</sub> +
- 4:Fe-oxide/hydroxide +
- 5:Fe-oxide/hydroxide +
- 6:TiO<sub>2</sub> +
- 7:Zircon
- 8:Plagioclase (Labradorite)
- 9:Chromite
- 10:Fe-oxide/hydroxide +
- 11:Fe-oxide/hydroxide +
- 12:Tourmaline
- 13:Mix
- 14:Garnet
- 15:Fe-oxide/hydroxide +
- 16:Fe-oxide/hydroxide +
- 17:Garnet
- 18:Quartz
- 19:Garnet
- 20:Fe-oxide/hydroxide +
- 21:Garnet
- 22:Garnet
- 23:Zircon
- 24:Tourmaline
- 25:Fe-oxide/hydroxide +
- 26:Fe-oxide/hydroxide +
- 27:Clinopyroxene
- 28:Spinel
- 29:Fe-oxide/hydroxide +
- 30:Epidote
- 31:Quartz + Fe-oxide/hydroxide
- 32:Fe-oxide/hydroxide +
- 33:TiO<sub>2</sub> + Chlorite
- 34:Zircon
- 35:Fe-oxide/hydroxide +
- 36:Albite
- 37:Mix

Figure B11.7: Sample S22 site 3 (SEM). The detrital minerals include: Fe-oxide/hydroxide, TiO<sub>2</sub>, Spl, Grt, Tur, Ep, Zrn, Cpx, Ab, PI (Lab), Ms, Qz.



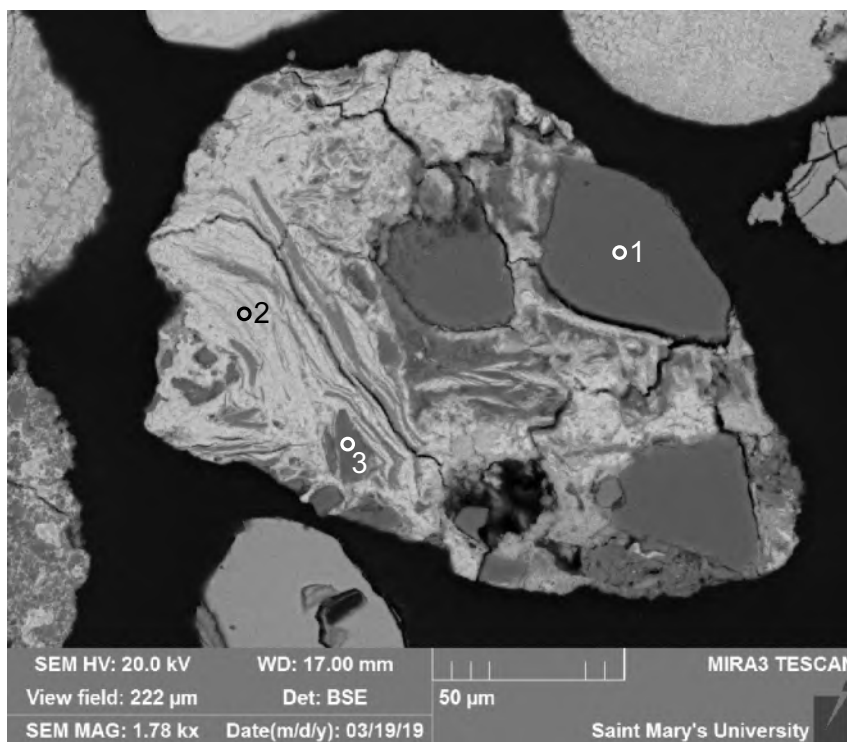

- 1:Quartz
- 2:Fe-oxide/hydroxide +
- 3:Quartz

Figure B11.8: Sample S22 site 3.1 (SEM). Pedogenic aggregate of quartz + Fe-oxide/hydroxide.

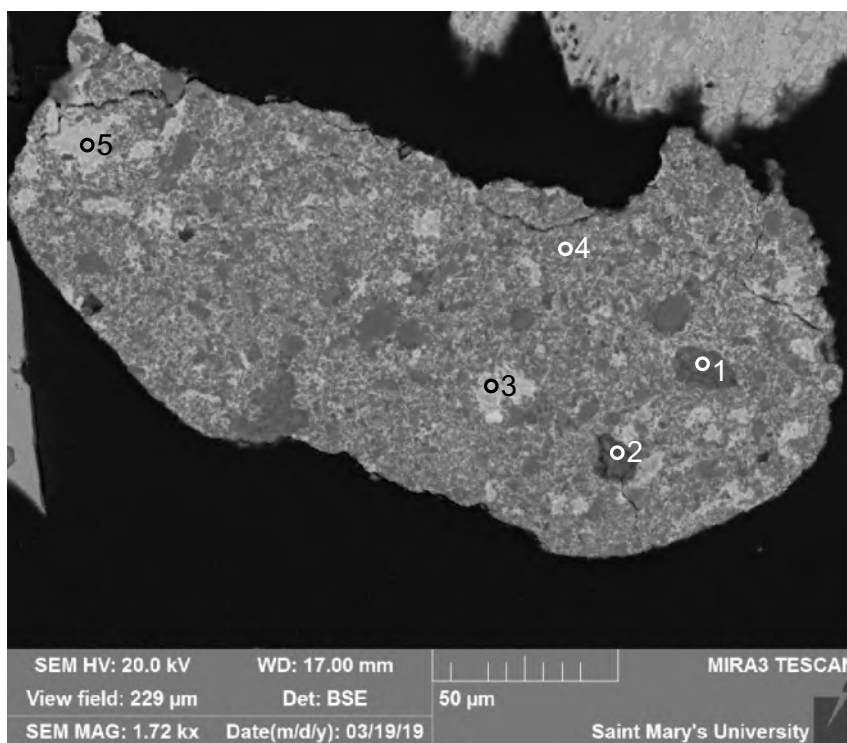

- 1:Muscovite +
- 2:Mix
- 3:Fe-oxide/hydroxide +
- 4:Quartz + Fe-oxide/hydroxide +
- 5:Fe-oxide/hydroxide +

Figure B11.9: Sample S22 site 3.2 (SEM). Siltstone or altered volcanic lithic clast.

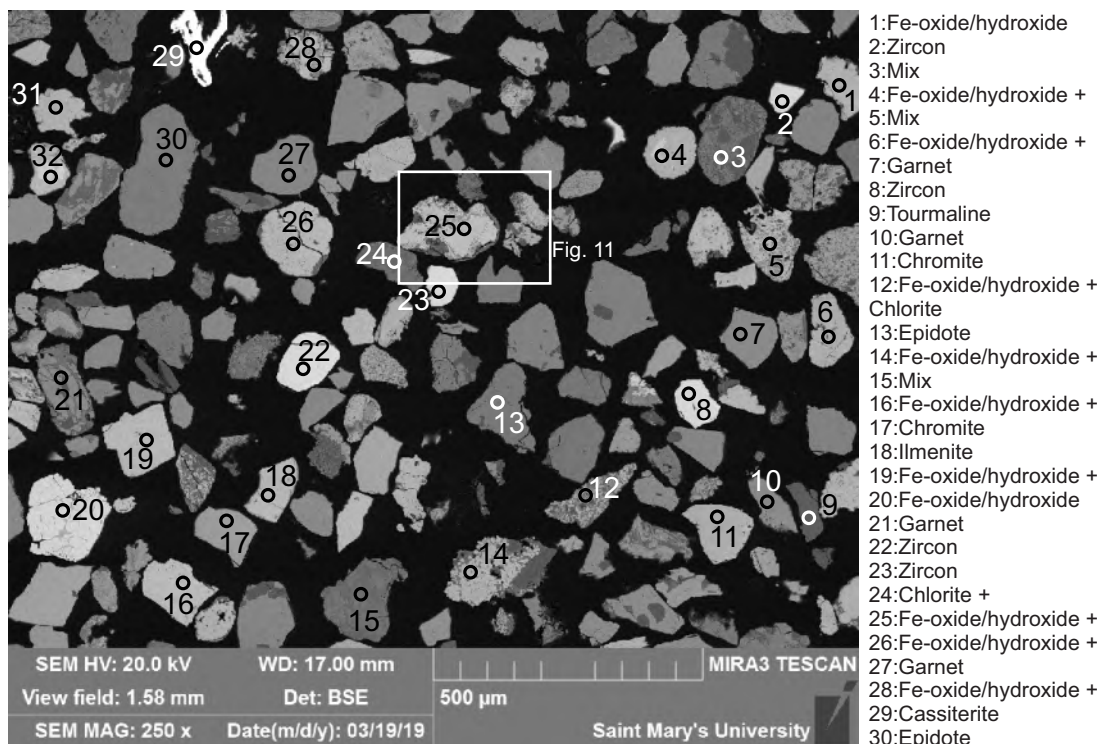

Figure B11.10: Sample S22 site 4 (SEM). The detrital minerals include: Fe-oxide/hydroxide, Ilm, Chr, Grt, Tur, Ep, Zrn, Qz, Cal, Chl, Py.

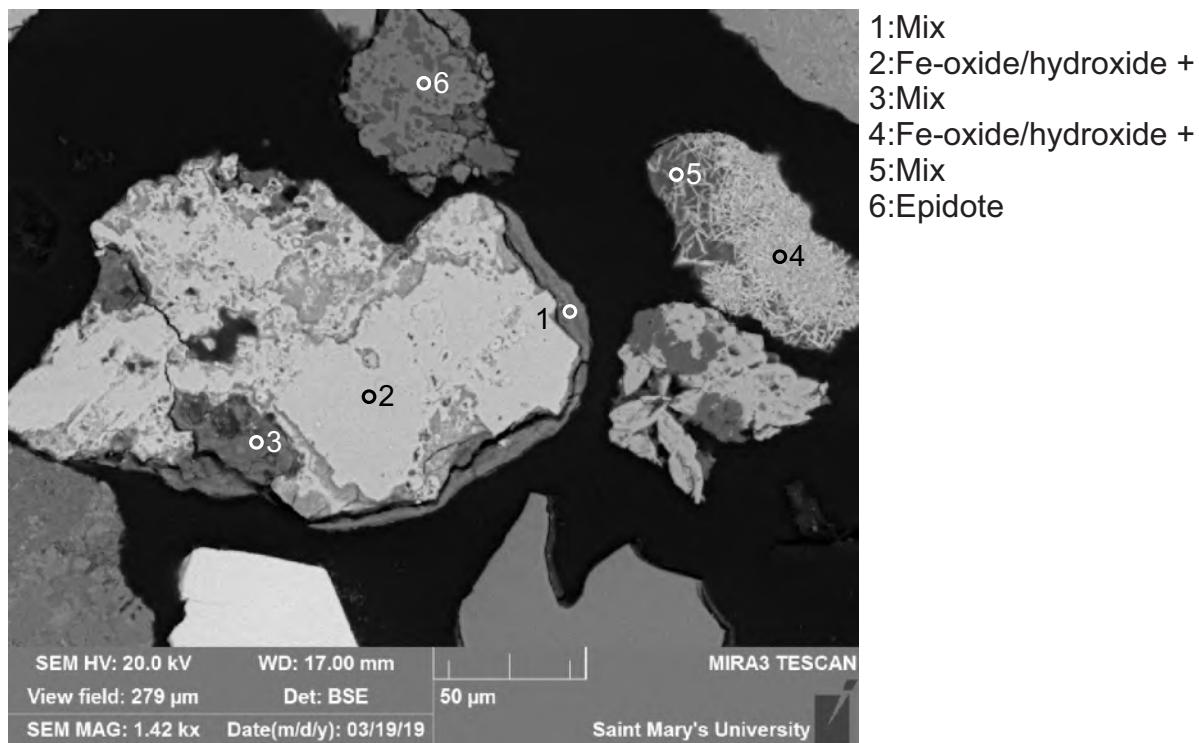

Figure B11.11: Sample S22 site 4.1 (SEM). Pedogenic aggregate.



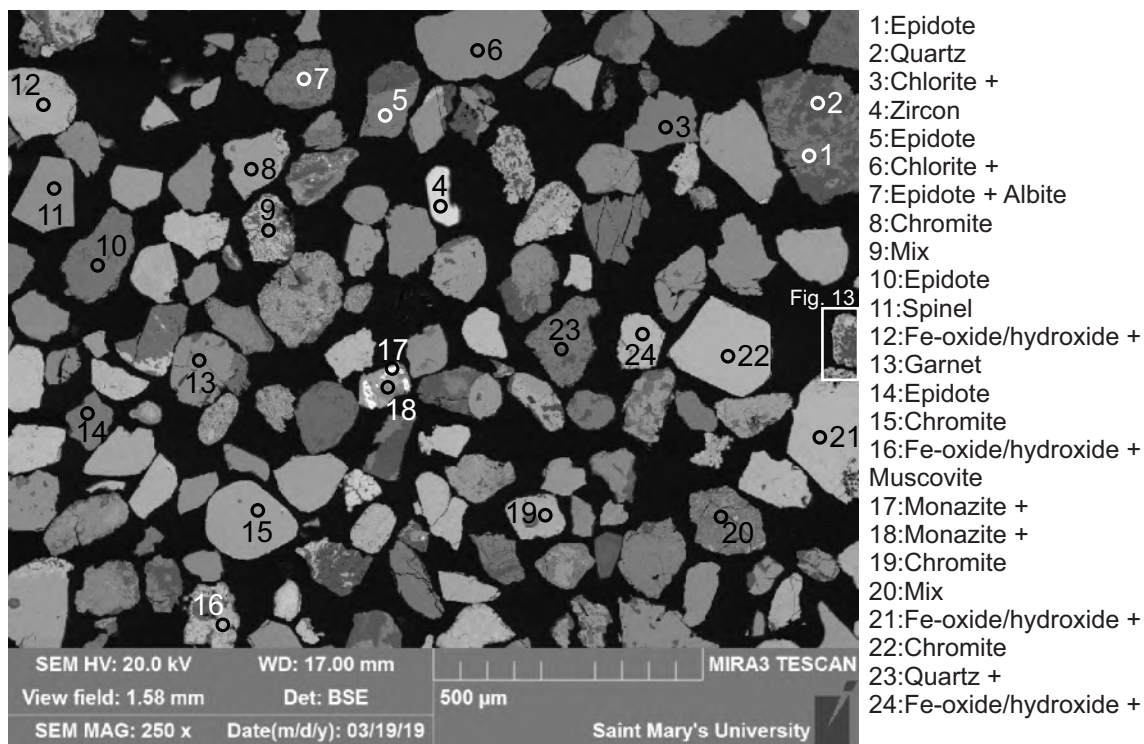

Figure B11.12: Sample S22 site 5 (SEM). The detrital minerals include: Fe-oxide/hydroxide,  $\text{TiO}_2$ , Chr, Spl, Grt, Ep, Zrn, Mnz, Pl (Byt), Qz, Ms.

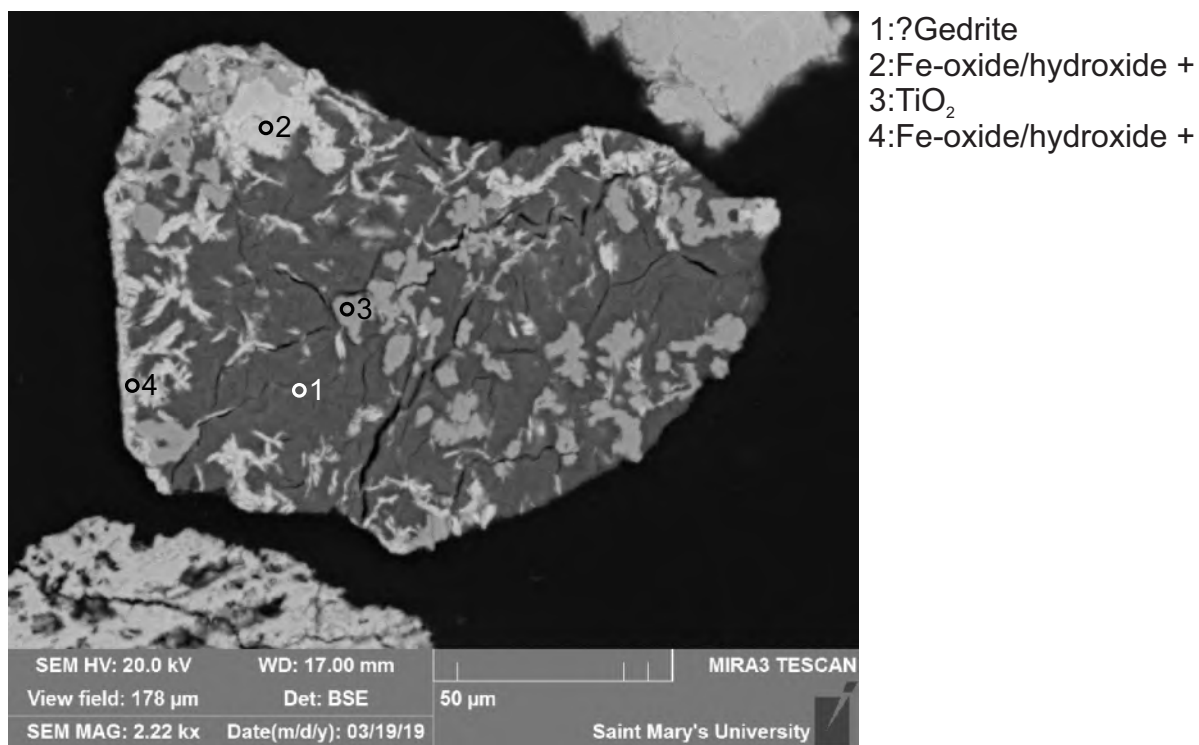

Figure B11.13: Sample S22 site 5.1 (SEM). Lithic clast ( $\text{TiO}_2$  + Fe-oxide/hydroxide and probably gedrite, metamorphic).

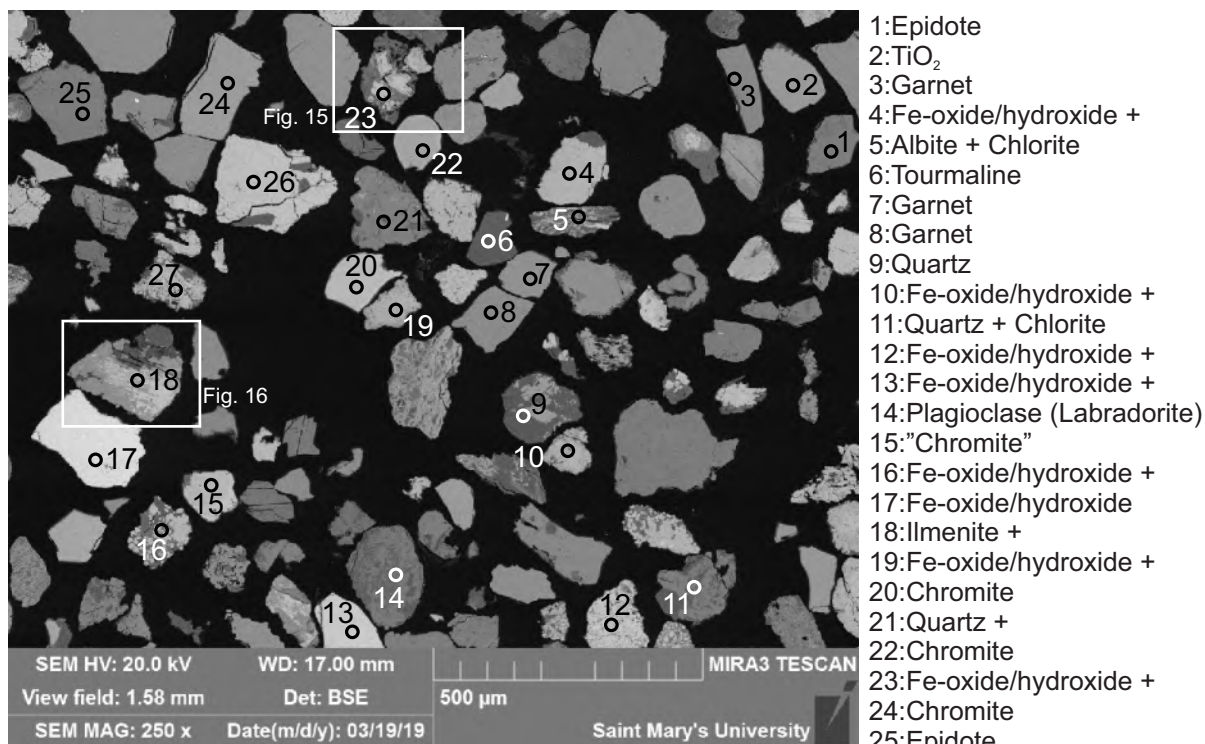

Figure B11.14: Sample S22 site 6 (SEM). The detrital minerals include: Fe-oxide/hydroxide, Ilm,  $\text{TiO}_2$ , Chr, Fe-Chr, Grt, Tur, Ep, Ttn, Ab, Pl (Lab), Ms, Qz, Chl.

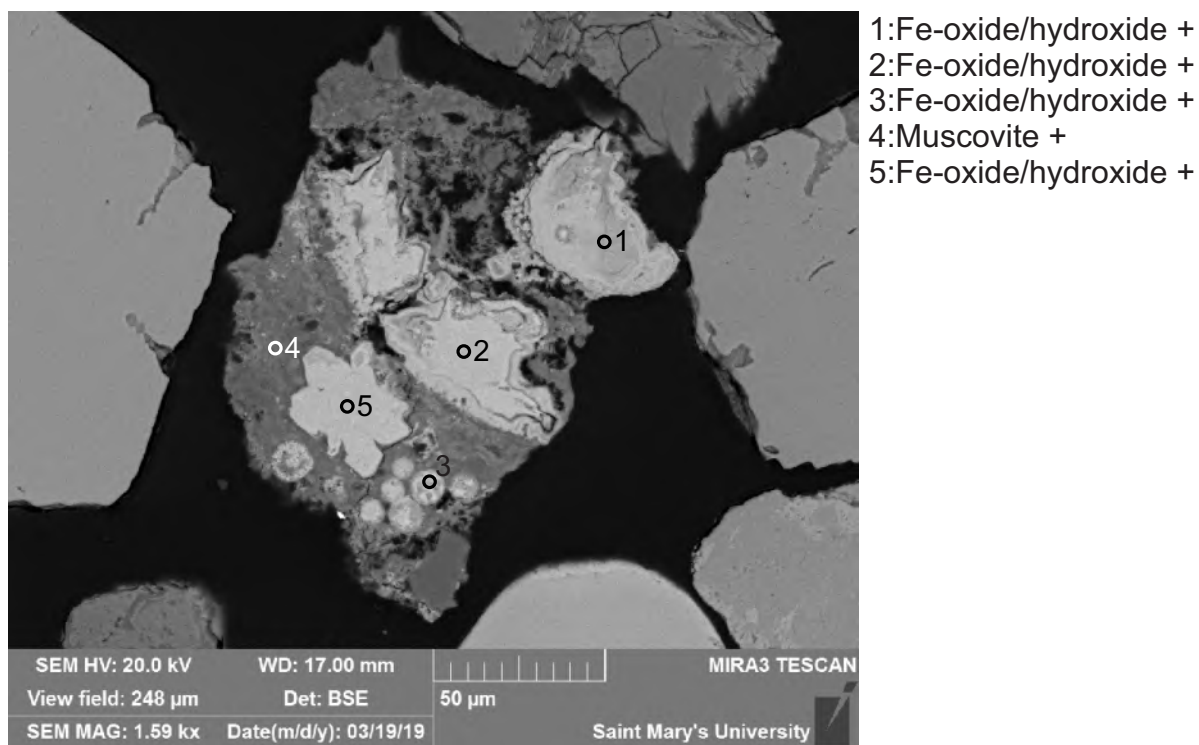

Figure B11.15: Sample S22 site 6.1 (SEM). Pedogenic aggregate.

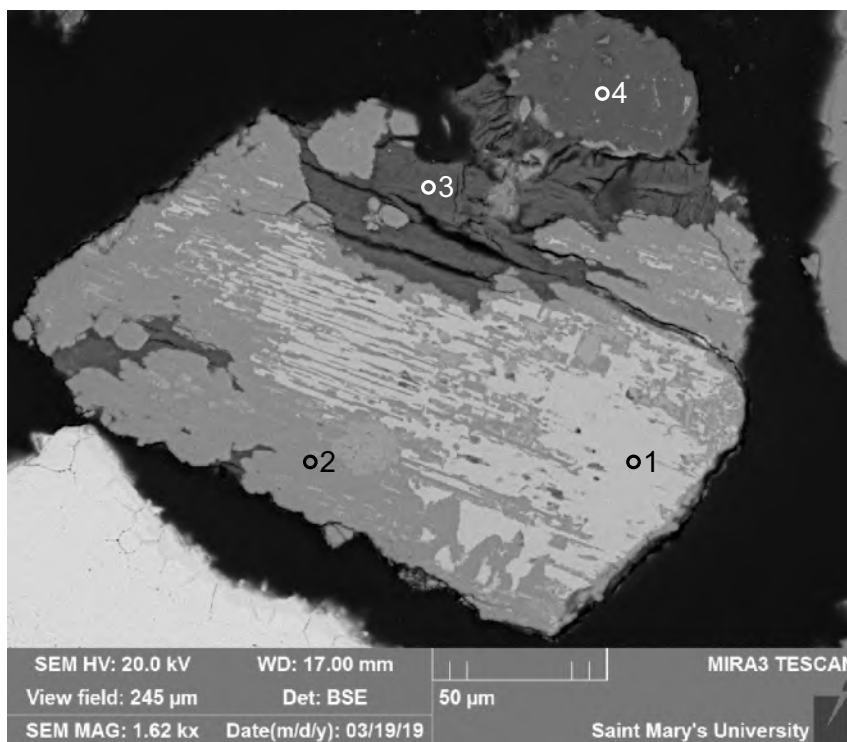

- 1:Ilmenite
- 2:Titanite
- 3:Unknown  
?metamorphic  
mineral
- 4:Albite +

Figure B11.16: Sample S22 site 6.2 (SEM). Lithic clast (albite + unknown mineral + ilmenite probably altered to titanite, metamorphic).

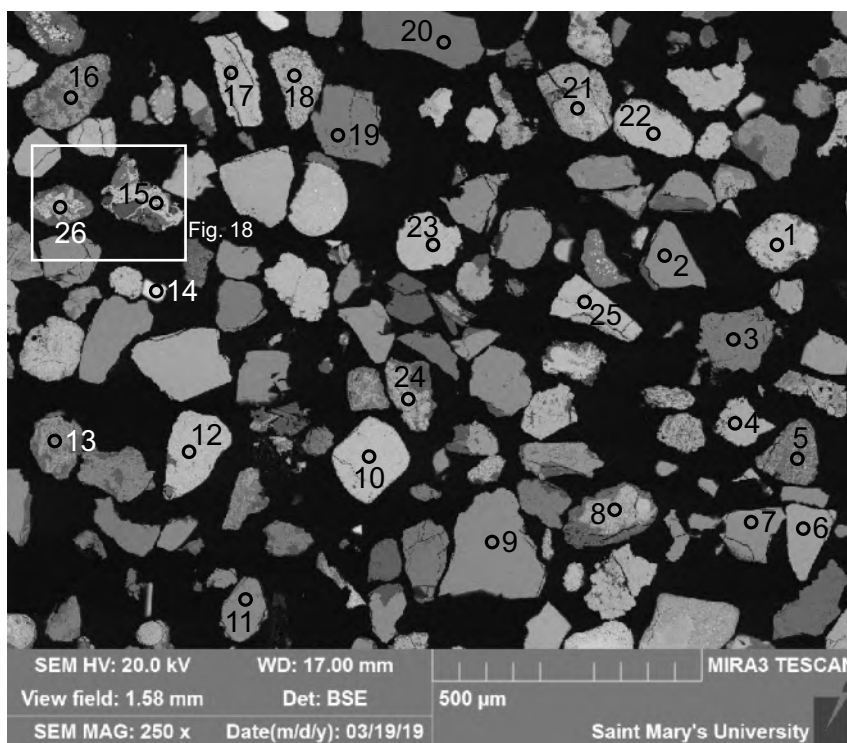

- 1:Fe-oxide/hydroxide +
- 2:Garnet
- 3:Epidote
- 4:Fe-oxide/hydroxide +
- 5:TiO<sub>2</sub> +
- 6:Chromite
- 7:Spinel
- 8:Fe-oxide/hydroxide + Chlorite
- 9:Garnet
- 10:Fe-oxide/hydroxide +
- 11:Titanite
- 12:Fe-oxide/hydroxide +
- 13:TiO<sub>2</sub> +
- 14:Zircon
- 15:Fe-oxide/hydroxide +
- 16:TiO<sub>2</sub> +
- 17:Fe-oxide/hydroxide + Chlorite
- 18:Fe-oxide/hydroxide + Chlorite
- 19:Epidote
- 20:Amphibole
- 21:Fe-oxide/hydroxide +
- 22:Fe-oxide/hydroxide +
- 23:Fe-oxide/hydroxide +
- 24:Fe-oxide/hydroxide +
- 25:Fe-oxide/hydroxide +
- 26:Chlorite +

Figure B11.17: Sample S22 site 7 (SEM). The detrital minerals include: Fe-oxide/hydroxide, Ilm, TiO<sub>2</sub>, Chr, Spl, Grt, Ep, Ttn, Zrn, Amph, Ab, Qz, Cal, Chl.



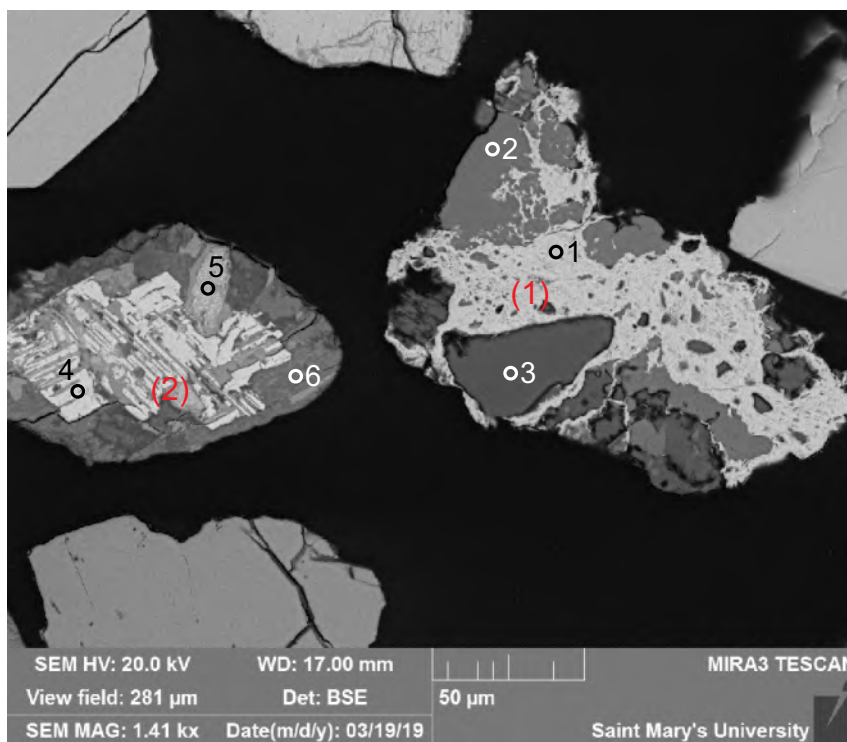

- 1:Fe-oxide/hydroxide +
- 2:Calcite
- 3:Albite
- 4:Fe-oxide/hydroxide +
- 5:"Ilmenite"
- 6:Mix?

Figure B11.18: Sample S22 site 7.1 (SEM). 1: Lithic clast (albite + calcite + Fe-oxide/hydroxide, altered sandstone). 2: Lithic clast (altered silicate minerals + a mixture of ilmenite and Fe-oxide/hydroxide).

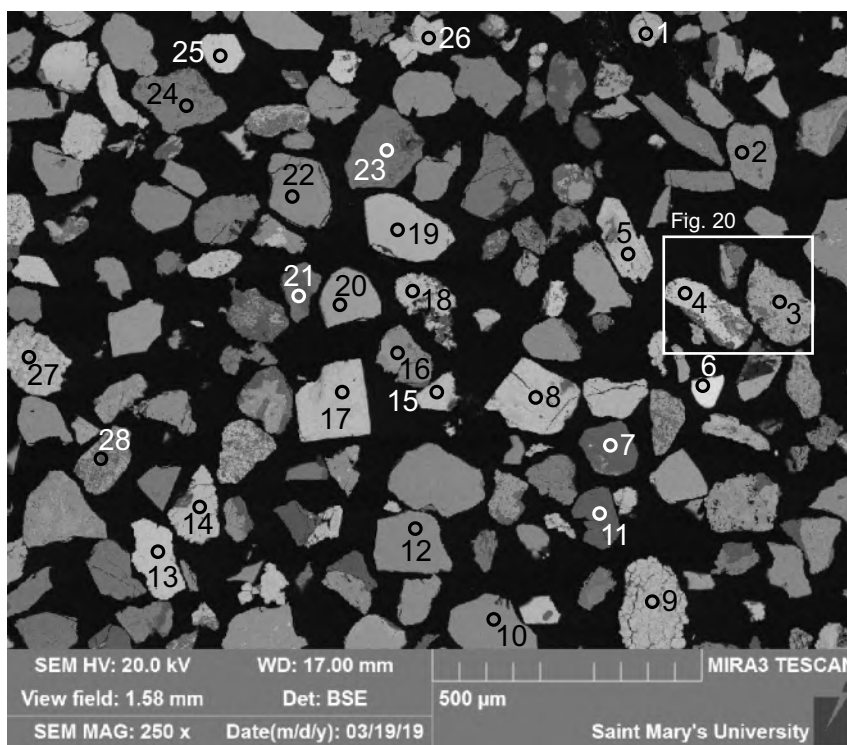

- 1:Fe-oxide/hydroxide +
- 2:Garnet
- 3:Fe-oxide/hydroxide +
- 4:Fe-oxide/hydroxide +
- 5:Fe-oxide/hydroxide +
- 6:Zircon
- 7:Tourmaline
- 8:Fe-oxide/hydroxide +
- 9:Fe-oxide/hydroxide +
- 10:Garnet ?
- 11:Tourmaline
- 12:Garnet
- 13:Fe-oxide/hydroxide +
- 14:Fe-oxide/hydroxide +
- 15:Fe-oxide/hydroxide +
- 16:TiO<sub>2</sub> + Quartz
- 17:Fe-oxide/hydroxide +
- 18:Fe-oxide/hydroxide +
- 19:Chromite
- 20:Chromite
- 21:Albite
- 22:Apatite
- 23:Epidote
- 24:Epidote
- 25:Fe-oxide/hydroxide +
- 26:Fe-oxide/hydroxide +
- 27:Fe-oxide/hydroxide +
- 28:Fe-oxide/hydroxide +

Figure B11.19: Sample S22 site 8 (SEM). The detrital minerals include: Fe-oxide/hydroxide, Ilm, TiO<sub>2</sub>, Chr, Grt, Tur, Ep, Zrn, Ab, Qz, Ap, Cal.

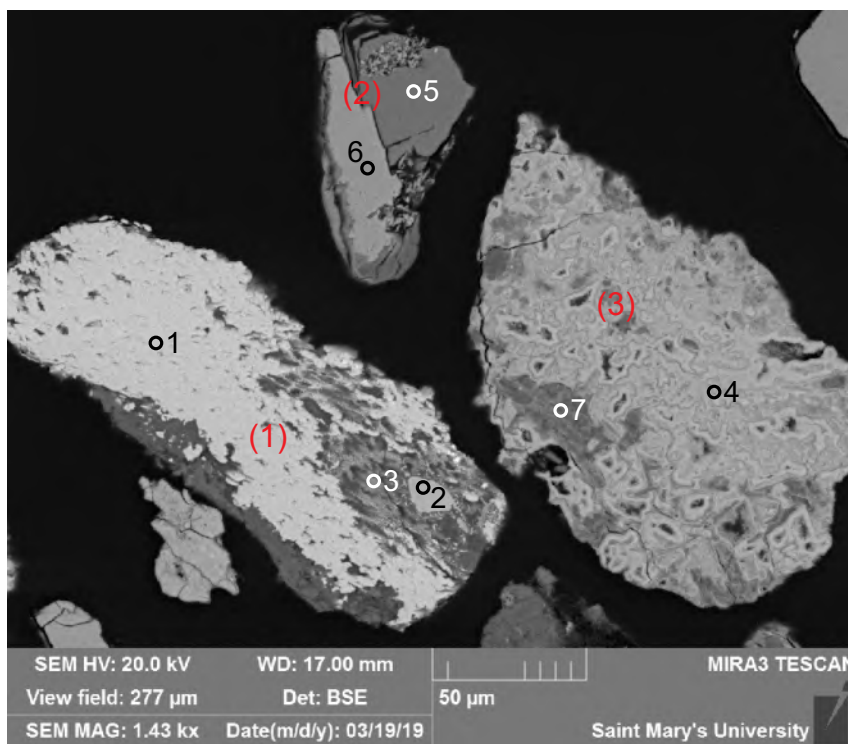

- 1: Fe-oxide/hydroxide +
- 2: Ilmenite +
- 3: Quartz + Fe-oxide/hydroxide
- 4: Fe-oxide/hydroxide +
- 5: Calcite
- 6:  $\text{TiO}_2$  +
- 7: Quartz +

Figure B11.20: Sample S22 site 8.1 (SEM). 1: Lithic clast (siltstone cemented by limonite). 2: Lithic clast (calcite +  $\text{TiO}_2$ , metamorphic). 3: Pedogenic aggregate.

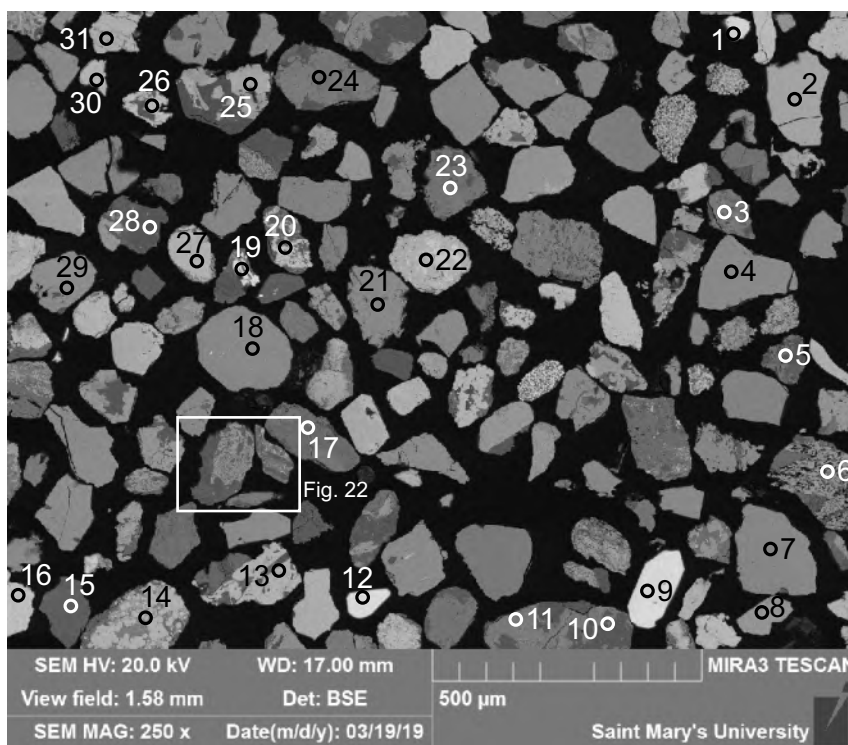

- 1: Zircon
- 2: Chromite
- 3: Chlorite +
- 4: Garnet
- 5: Plagioclase (Oligoclase)
- 6:  $\text{TiO}_2$  +
- 7: Garnet
- 8:  $\text{TiO}_2$
- 9: Zircon
- 10: Quartz
- 11: Epidote
- 12: Zircon
- 13: Fe-oxide/hydroxide +
- 14: Mix
- 15: Tourmaline
- 16: Fe-oxide/hydroxide +
- 17: Epidote
- 18: Garnet
- 19: Zircon +
- 20: Fe-oxide/hydroxide +
- 21: Titanite
- 22: Fe-oxide/hydroxide +
- 23: Epidote
- 24: Chlorite
- 25: Chromite
- 26: Fe-oxide/hydroxide +
- 27: Fe-oxide/hydroxide +
- 28: Quartz
- 29: Garnet
- 30: Fe-oxide/hydroxide
- 31: Fe-oxide/hydroxide

Figure B11.21: Sample S22 site 9 (SEM). The detrital minerals include: Fe-oxide/hydroxide,  $\text{TiO}_2$ , Chr, Grt, Tur, Ep, Ttn, Zrn, Ab, Pl (Olig), Ms, Qz, Chl.



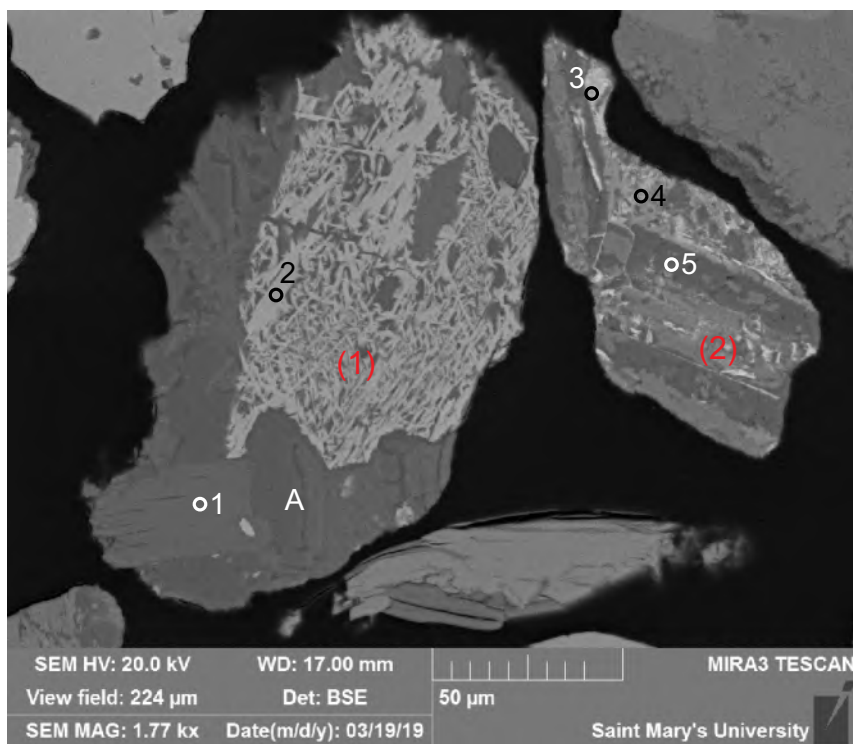

- 1: Muscovite
- 2:  $\text{TiO}_2$  +
- 3: Fe-oxide/hydroxide +
- 4: Mix
- 5: Albite

Figure B11.22: Sample S22 site 9.1 (SEM). 1: Lithic clast (muscovite + another sheet silicate (position A) +  $\text{TiO}_2$  with trellis structure (altered ilmenite), metamorphic). 2: Lithic clast (albite + Fe-oxide/hydroxide + possibly altered chlorite, metamorphic).

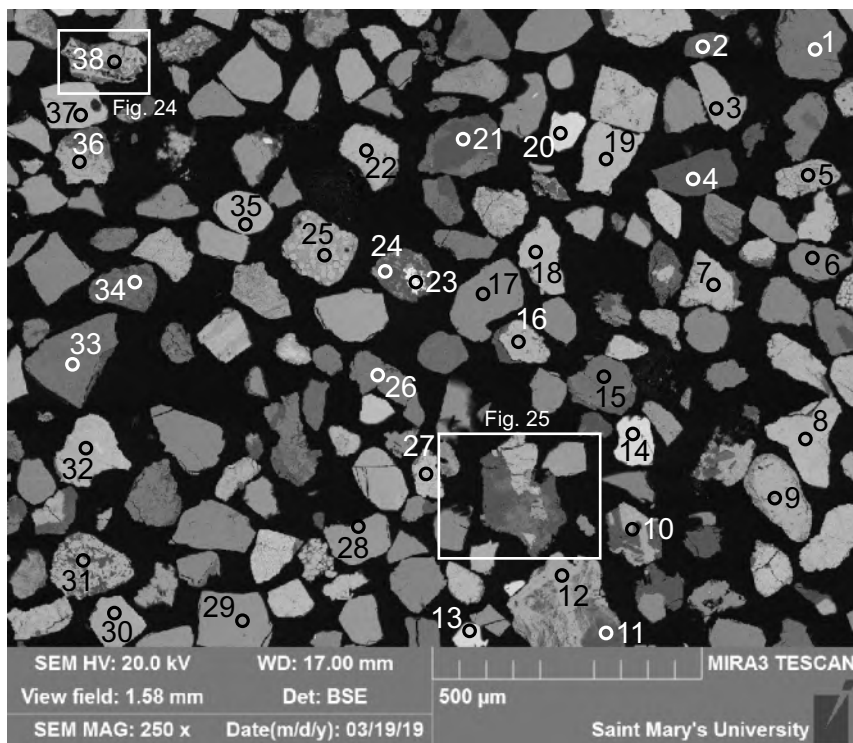

- 1: Epidote
- 2: Epidote
- 3: Chromite
- 4: Tourmaline
- 5: Fe-oxide/hydroxide +
- 6: Garnet
- 7: Fe-oxide/hydroxide +
- 8: Fe-oxide/hydroxide +
- 9: Fe-oxide/hydroxide +
- 10: Quartz +
- 11: Quartz
- 12: Fe-oxide/hydroxide +
- 13: Zircon
- 14: Zircon
- 15: Clinopyroxene
- 16: Fe-oxide/hydroxide +
- 17: Garnet
- 18: Fe-oxide/hydroxide +
- 19: Fe-oxide/hydroxide +
- 20: Zircon
- 21: Albite +
- 22: Fe-oxide/hydroxide +
- 23:
- 24: Muscovite
- 25: Fe-oxide/hydroxide +
- 26: Epidote
- 27: Fe-oxide/hydroxide +
- 28: Chromite
- 29: Chromite
- 30: Chromite
- 31: Chromite
- 32: Fe-oxide/hydroxide +
- 33: Epidote
- 34: Epidote
- 35: Chromite
- 36: Fe-oxide/hydroxide +
- 37: Ilmenite
- 38: Fe-oxide/hydroxide +

Figure B11.23: Sample S22 site 10 (SEM). The detrital minerals include: Fe-oxide/hydroxide, Ilm, Chr, Spl, Grt, Tur, Ep, Zrn, Cpx, Ab, Ms, Qz, Chl, Cal.

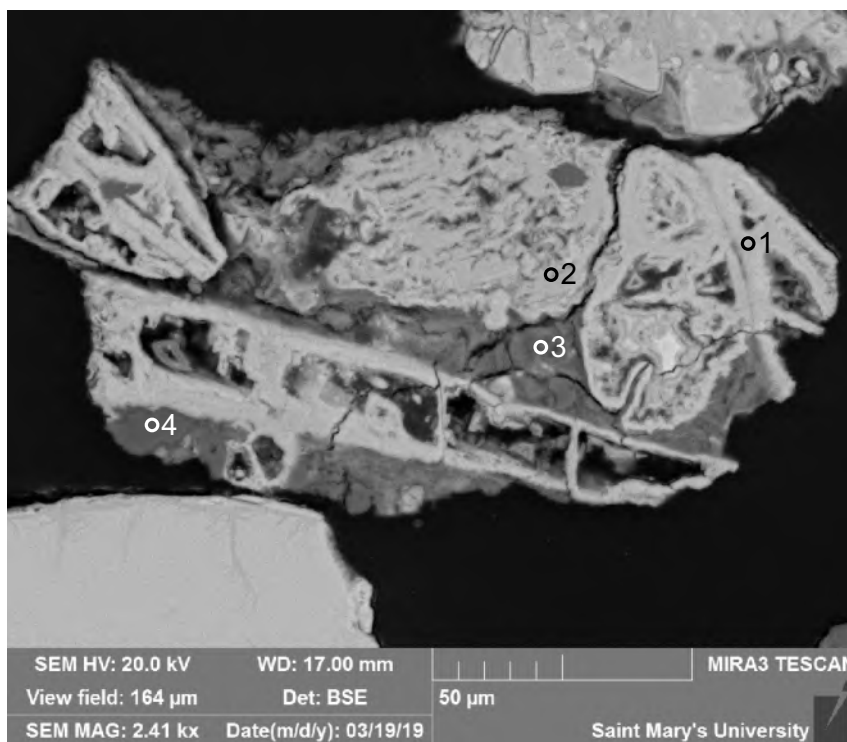

- 1:Fe-oxide/hydroxide +
- 2:Fe-oxide/hydroxide +
- 3:Chlorite + Muscovite +
- 4:Quartz

Figure B11.24: Sample S22 site 10.1 (SEM). Pedogenic aggregate.

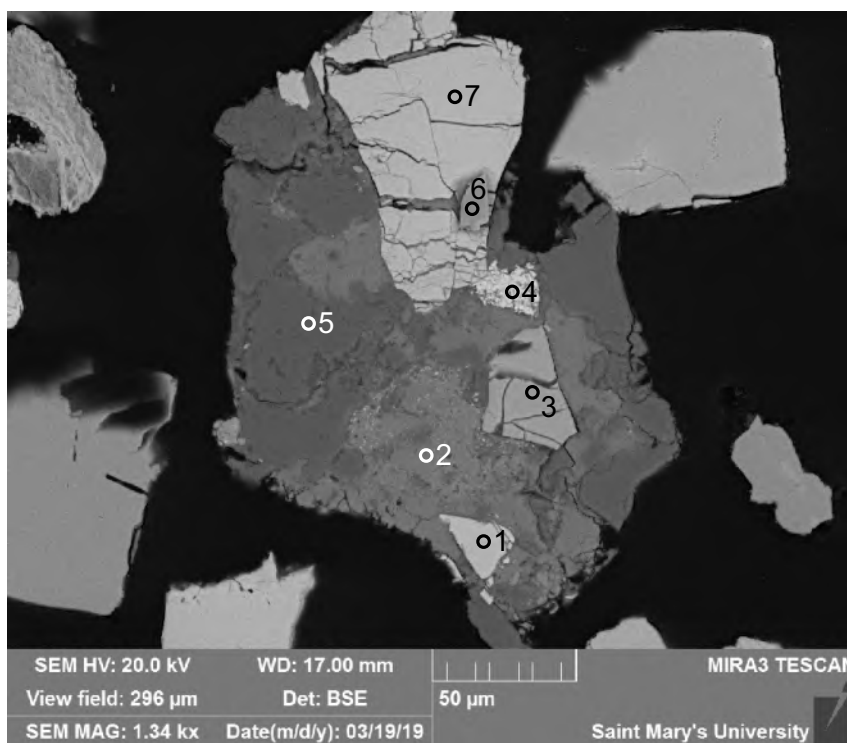

- 1:Chromite
- 2:Calcite +
- 3:Chromite
- 4:Fe-oxide/hydroxide
- 5:Albite
- 6:Spinel
- 7:Ilmenite

Figure B11.25: Sample S22 site 10.2 (SEM). Lithic clast made up of albite + chromite + ilmenite with spinel inclusion + calcite. Calcite appears to have partially replaced albite. ?Metaophiolite.

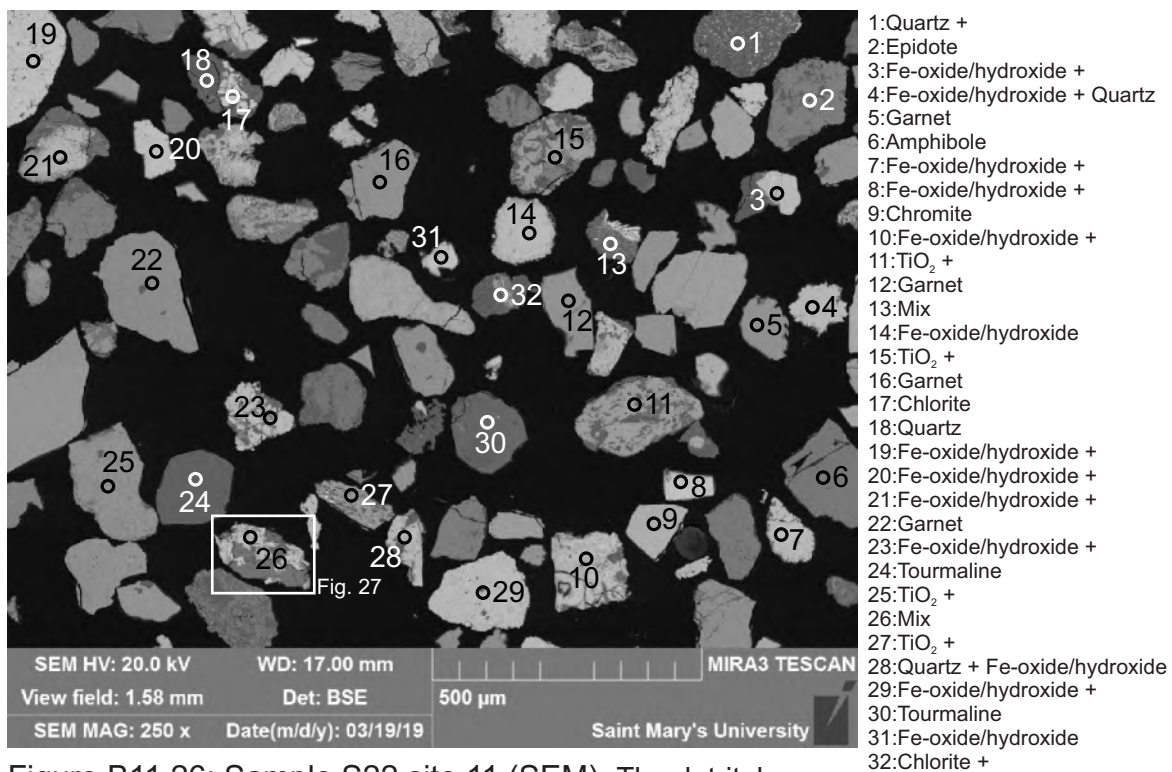

Figure B11.26: Sample S22 site 11 (SEM). The detrital minerals include: Fe-oxide/hydroxide, TiO<sub>2</sub>, Chr, Grt, Tur, Ep, Amph, Ms, Qz, Chl, Cal.

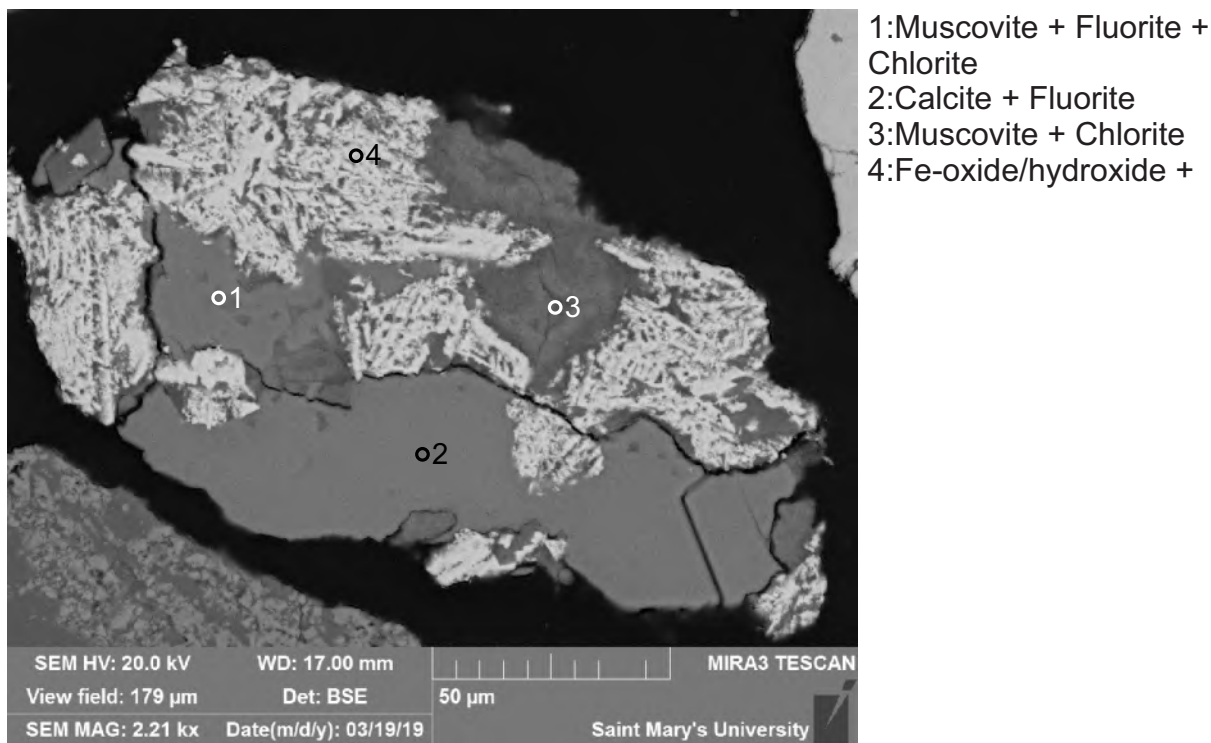

Figure B11.27: Sample S22 site 11.1 (SEM). Lithic clast made up of muscovite + altered silicate minerals + calcite + Fe-oxide/hydroxide, originally magnetite. Altered metamorphic or hydrothermal.



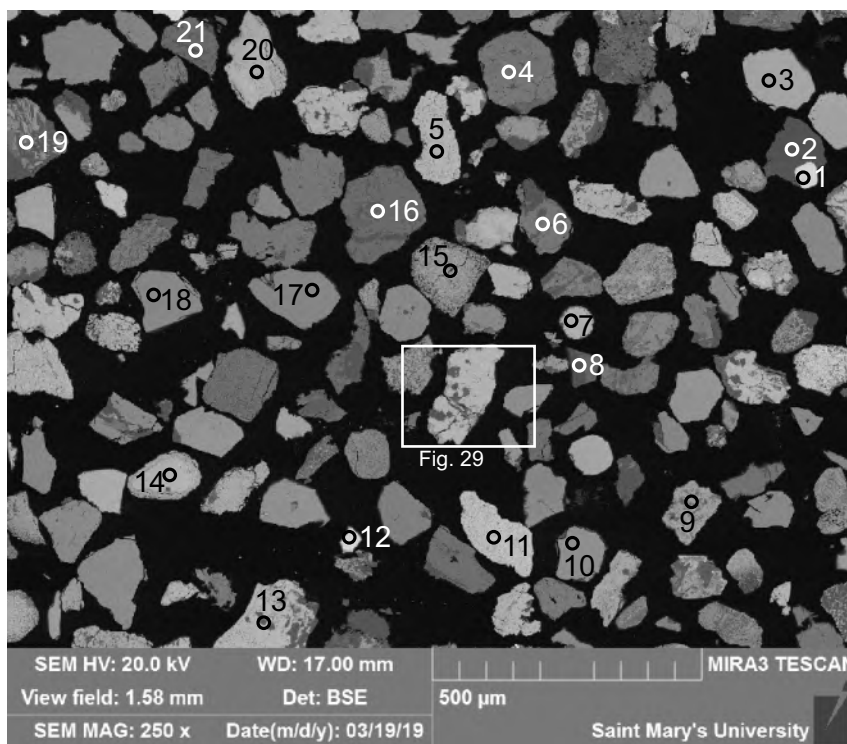

- 1:Zircon
- 2:Quartz
- 3:Chromite
- 4:Epidote
- 5:Fe-oxide/hydroxide +
- 6:Epidote
- 7:Fe-oxide/hydroxide +
- 8:Tourmaline
- 9:Mix
- 10:Spinel
- 11:Fe-oxide/hydroxide +
- 12:Zircon
- 13:Mn-oxide/hydroxide +
- 14:Fe-oxide/hydroxide +
- 15:Fe-oxide/hydroxide +
- 16:Epidote
- 17:Garnet
- 18:Spinel
- 19:Mix
- 20:Fe-oxide/hydroxide +
- 21:Epidote

Figure B11.28: Sample S22 site 12 (SEM). The detrital minerals include: Fe-oxide/hydroxide, Ilm, Chr, Spl, Grt, Tur, Ep, Zrn, Qz. Mn-ohy may be either detrital or due to pedogenesis.

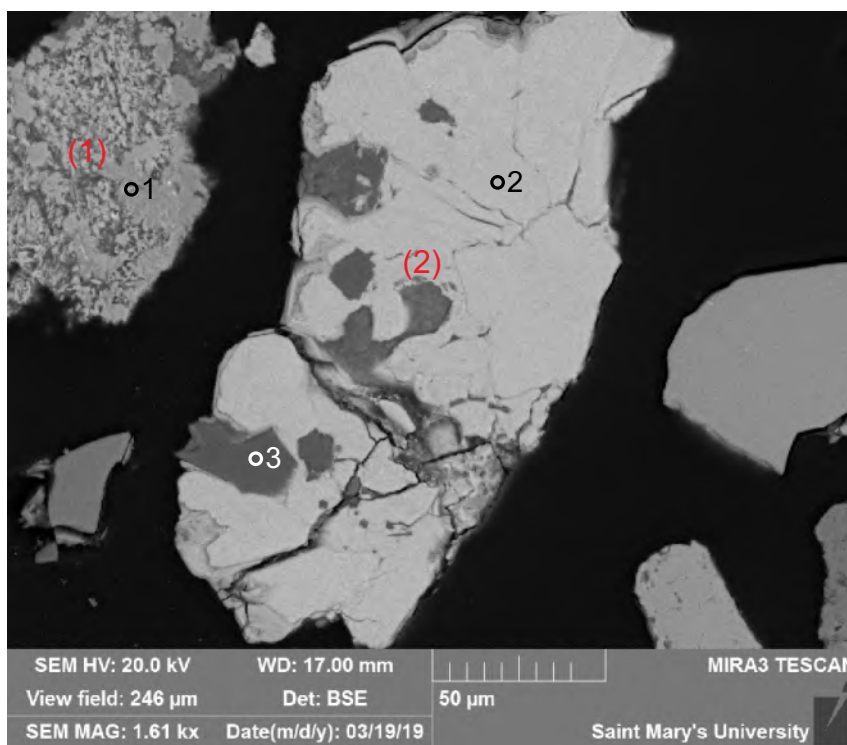

- 1:Ilmenite
- 2:Fe-oxide/hydroxide +
- 3:Quartz +

Figure B11.29: Sample S22 site 12.1 (SEM). 1: Partly altered detrital ilmenite grain. 2: Pedogenic aggregate cementing silt-sized quartz.

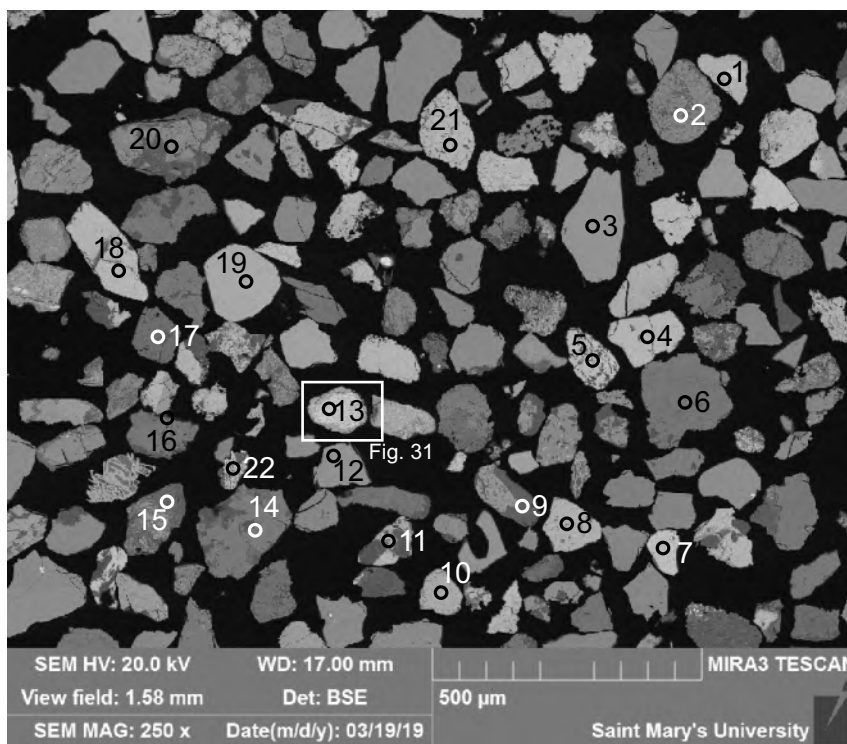

- 1:Fe-oxide/hydroxide +
- 2:Mix
- 3:TiO<sub>2</sub>
- 4:Fe-oxide/hydroxide +
- 5:"Chromite"
- 6:Epidote
- 7:Fe-oxide/hydroxide +
- Chlorite
- 8:Fe-oxide/hydroxide +
- 9:Muscovite
- 10:Fe-oxide/hydroxide +
- 11:Fe-oxide/hydroxide +
- 12:Chromite
- 13:Pyrite +
- 14:Epidote +
- 15:Quartz + Chlorite
- 16:Epidote
- 17:Amphibole
- 18:Fe-oxide/hydroxide +
- 19:Chromite
- 20:Titanite
- 21:Fe-oxide/hydroxide +
- 22:Mix

Figure B11.30: Sample S22 site 13 (SEM). The detrital minerals include: Fe-oxide/hydroxide, TiO<sub>2</sub>, Chr, Fe-Chr, Grt, Tur, Ep, Ttn, Amph, Ms, Qz, Chl, Py.

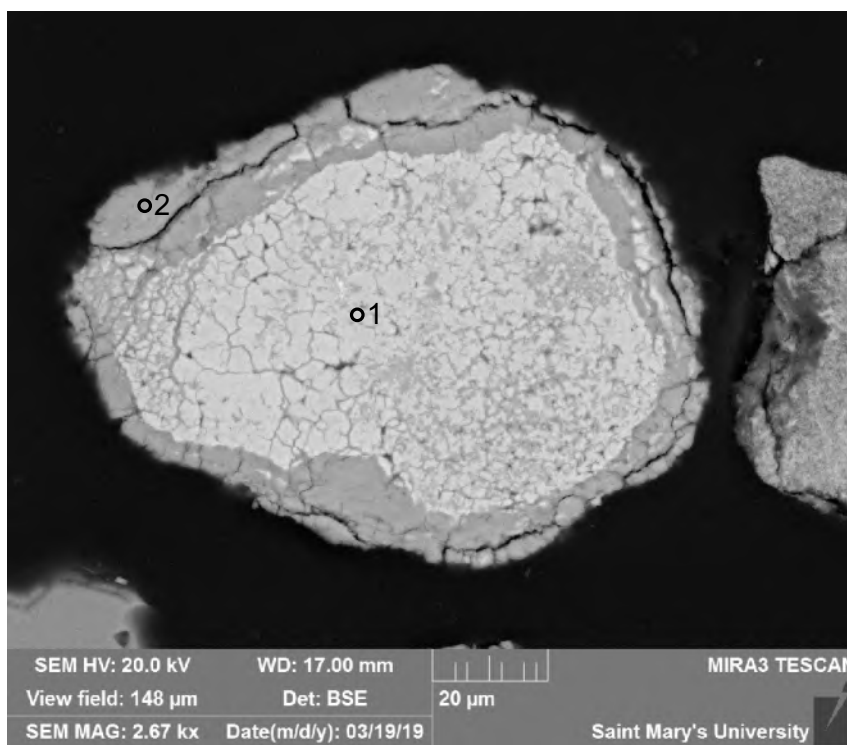

- 1:Pyrite +
- 2:Fe-oxide/hydroxide +

Figure B11.31: Sample S22 site 13.1 (SEM). Detrital pyrite nodule with Fe-oxide/hydroxide rim forming from the oxidation of pyrite.



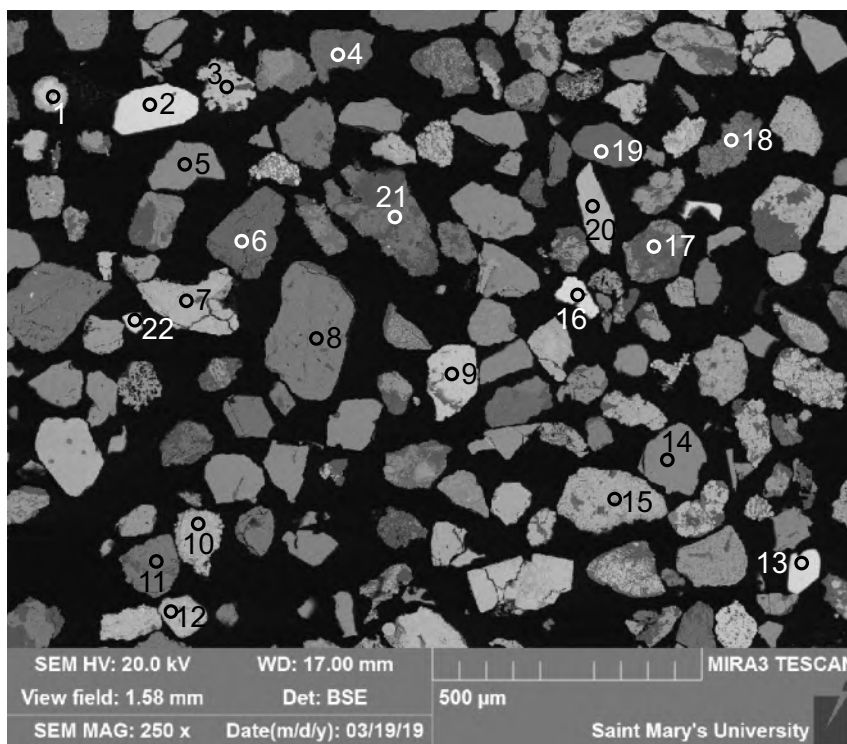

- 1:Pyrite +
- 2:Zircon
- 3:Fe-oxide/hydroxide +
- 4:Epidote + Albite
- 5:Garnet
- 6:Epidote
- 7:Fe-oxide/hydroxide +
- 8:Epidote
- 9:Fe-oxide/hydroxide +
- 10:Fe-oxide/hydroxide +
- 11:Mix
- 12:Fe-oxide/hydroxide +
- 13:Zircon
- 14:Garnet
- 15:Fe-oxide/hydroxide +
- 16:Zircon
- 17:Quartz +
- 18:Epidote
- 19:Epidote
- 20:Fe-oxide/hydroxide +
- 21:Epidote
- 22:Zircon

Figure B11.32: Sample S22 site 14 (SEM). The detrital minerals include: Fe-oxide/hydroxide, Grt, Ep, Zrn, Qz, Py.

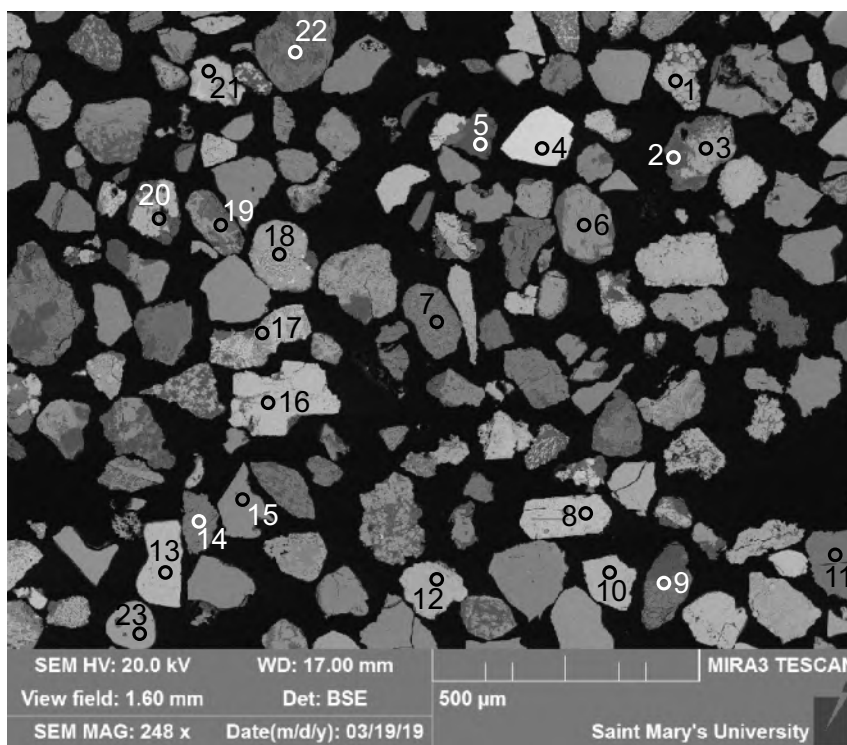

- 1:Fe-oxide/hydroxide +
- 2:Quartz +
- 3:Fe-oxide/hydroxide +
- 4:Zircon
- 5:Albite
- 6:TiO<sub>2</sub> +
- 7:Mix
- 8:Fe-oxide/hydroxide +
- 9:Epidote
- 10:Fe-oxide/hydroxide +
- 11:Epidote
- 12:Fe-oxide/hydroxide +
- 13:Fe-oxide/hydroxide +
- 14:Epidote
- 15:Garnet
- 16:Fe-oxide/hydroxide +
- 17:Mix
- 18:Fe-oxide/hydroxide +
- 19:"Ilmenite" +
- 20:Fe-oxide/hydroxide +
- 21:Fe-oxide/hydroxide +
- 22:Albite
- 23:Chromite

Figure B11.33: Sample S22 site 15 (SEM). The detrital minerals include: Fe-oxide/hydroxide, Ilm, TiO<sub>2</sub>, Chr, Grt, Ep, Zrn, Ab, Qz.

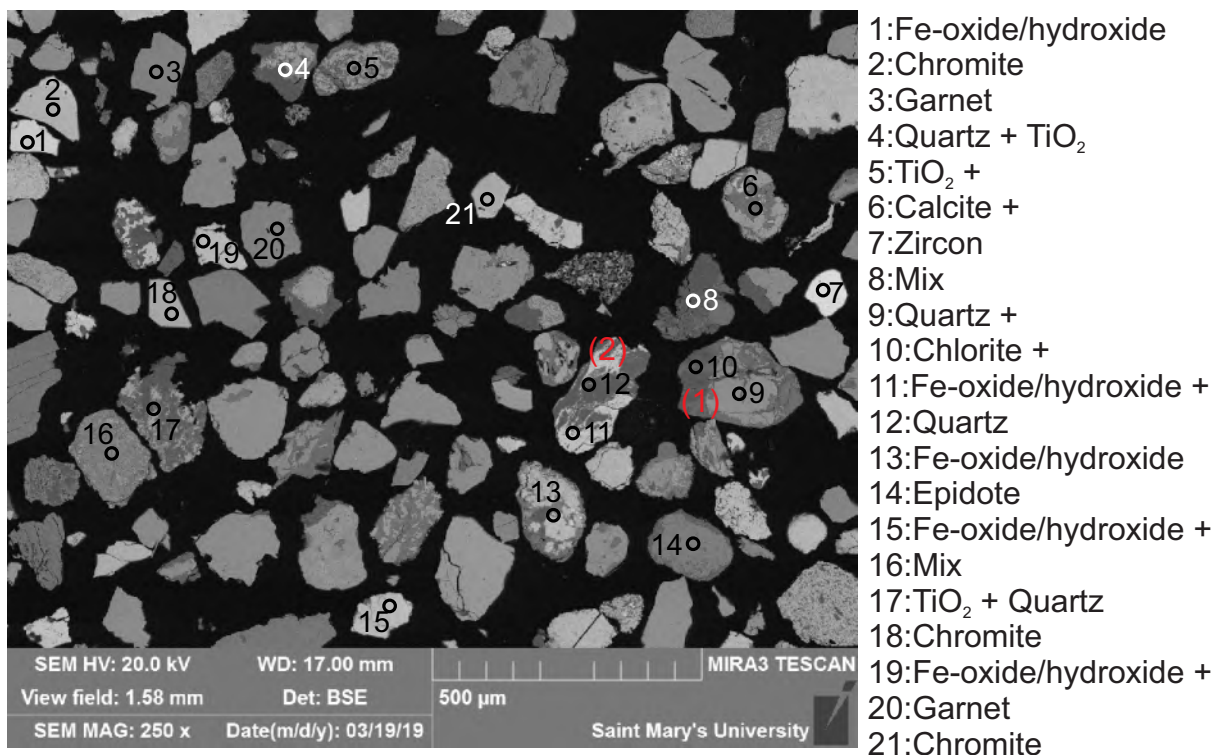

Figure B11.34: Sample S22 site 16 (SEM). The detrital minerals include: Fe-oxide/hydroxide, TiO<sub>2</sub>, Chr, Grt, Ep, Qz, Cal, Chl. 1: Lithic clast (quartz + chlorite, hydrothermal). 2: Lithic clast (quartz + Fe-oxide/hydroxide, hydrothermal).

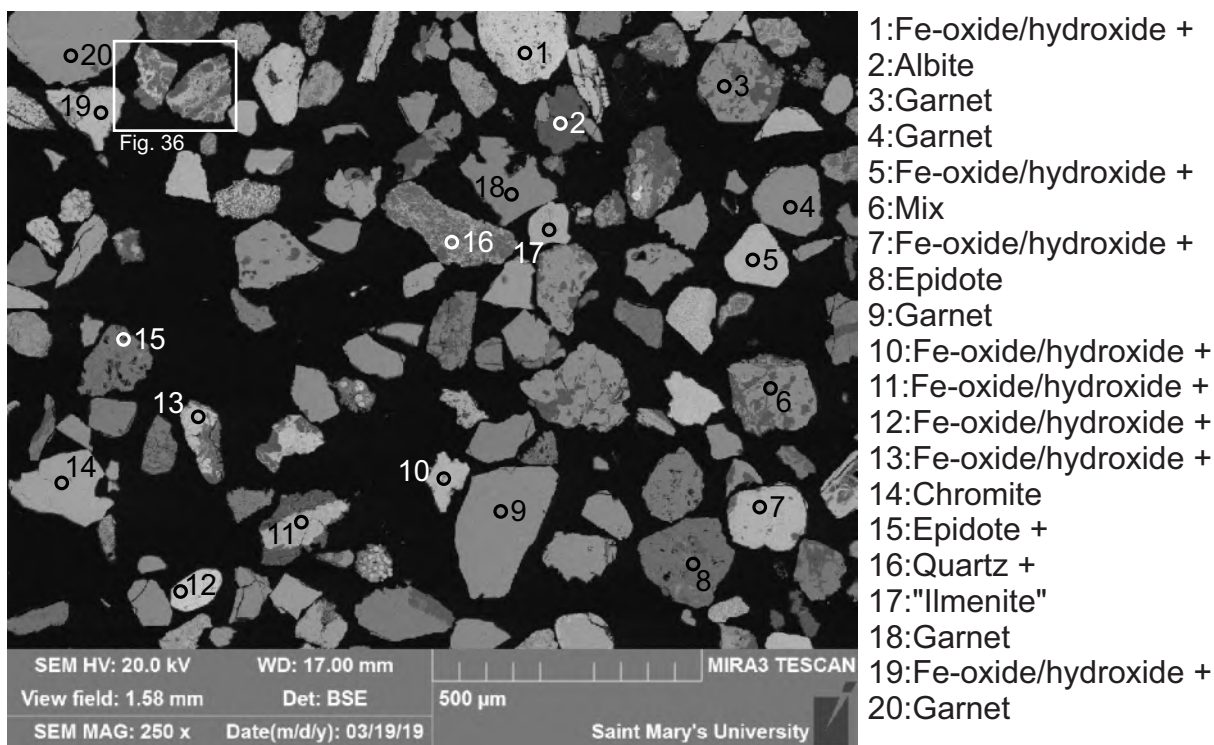

Figure B11.35: Sample S22 site 17 (SEM). The detrital minerals include: Fe-oxide/hydroxide, Ilm, Chr, Grt, Ep, Ab, Pl (Lab), Qz.



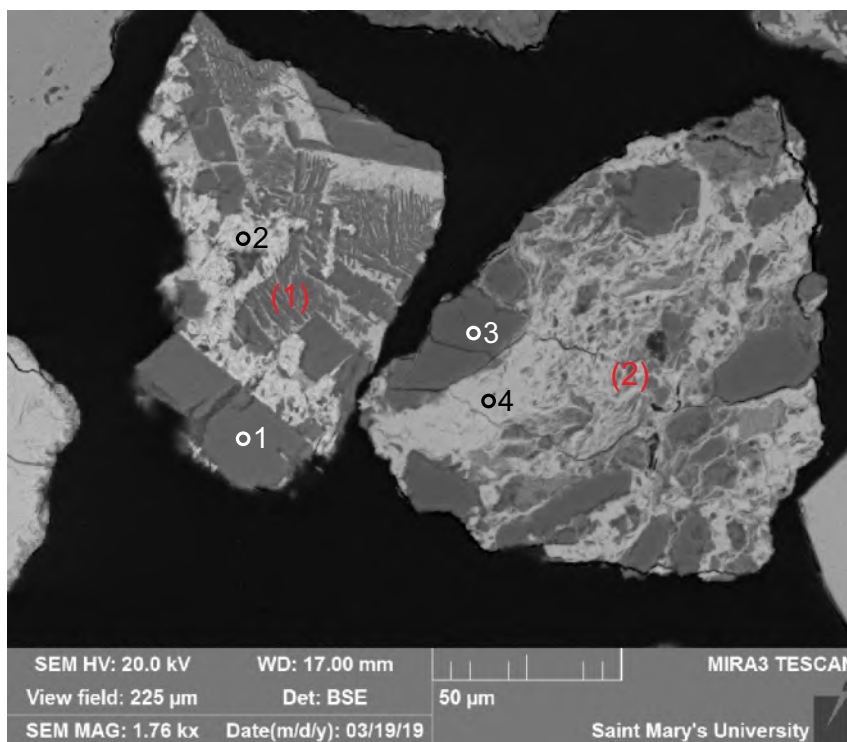

- 1:Plagioclase  
(Labradorite)
- 2:Fe-oxide/hydroxide +
- 3:Quartz
- 4:Fe-oxide/hydroxide +

Figure B11.36: Sample S22 site 17.1 (SEM). 1: Lithic clast (plagioclase + Fe-oxide/hydroxide, altered igneous). 2: Lithic clast (quartz + Fe-oxide/hydroxide, probably limonite cemented sandstone).

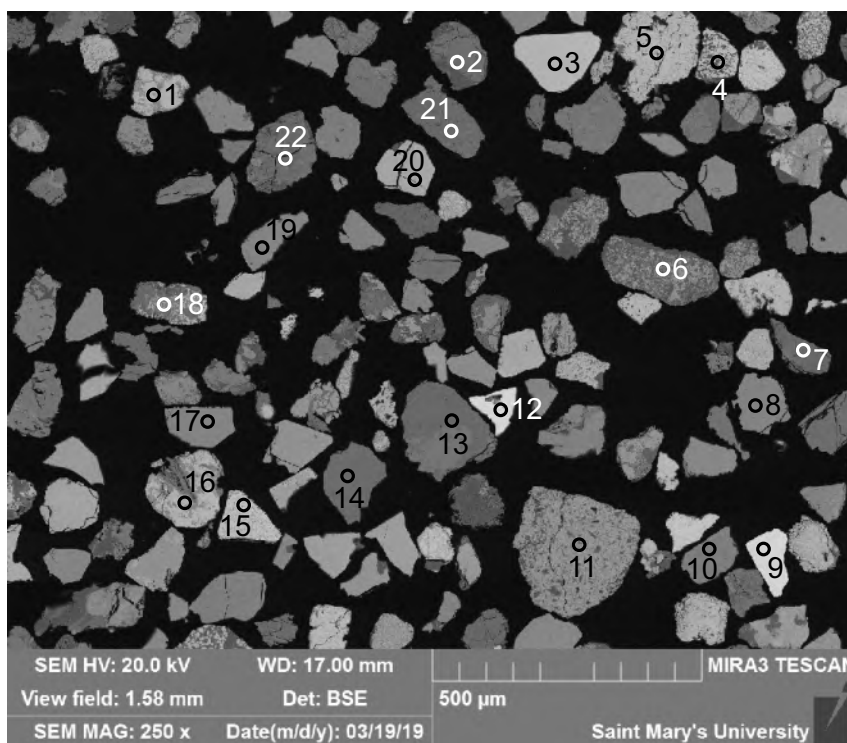

- 1:Ilmenite
- 2:Epidote
- 3:Chromite
- 4:Chromite
- 5:Fe-oxide/hydroxide +
- 6:Quartz +  $TiO_2$
- 7:Epidote
- 8:Garnet +
- 9:Zircon
- 10:Garnet
- 11:Mix
- 12:Zircon
- 13:Epidote
- 14:Epidote
- 15:Fe-oxide/hydroxide +
- 16:Titanite
- 17:Garnet
- 18:Fe-oxide/hydroxide +
- 19:Garnet
- 20:Chromite
- 21:Epidote
- 22:Garnet

Figure B11.37: Sample S22 site 18 (SEM). The detrital minerals include: Fe-oxide/hydroxide, Ilm, Chr, Grt, Ep, Ttn, Zrn, Qz.

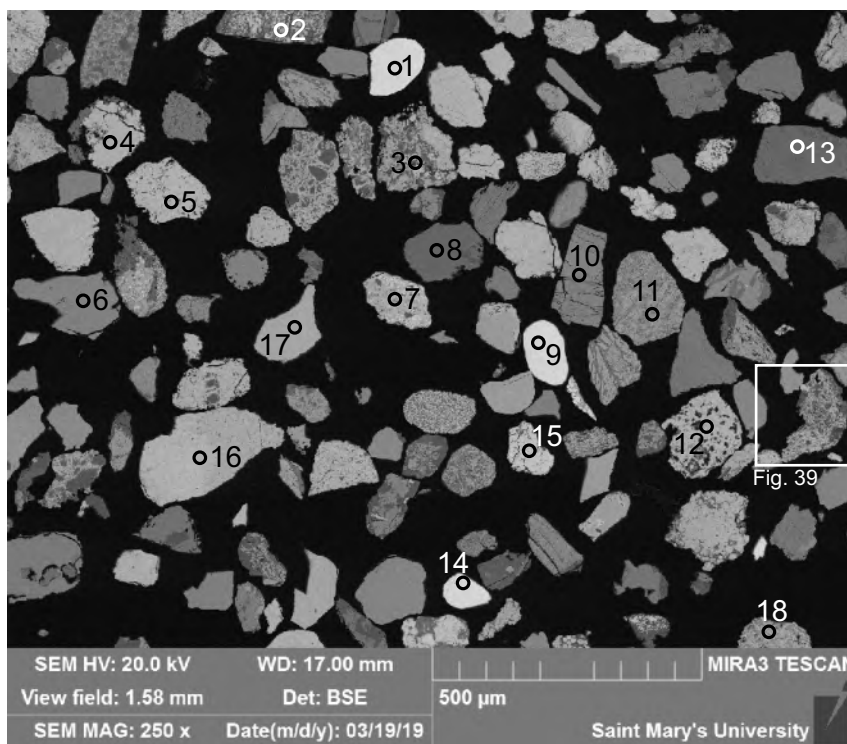

- 1:Zircon
- 2:Fe-oxide/hydroxide +
- 3:Mix
- 4:Fe-oxide/hydroxide +
- 5:Fe-oxide/hydroxide +
- 6:Garnet
- 7:Fe-oxide/hydroxide +
- 8:Epidote
- 9:Zircon
- 10:Apatite +
- 11:Titanite +
- 12:Fe-oxide/hydroxide +
- 13:Epidote
- 14:Zircon
- 15:Fe-oxide/hydroxide +
- 16:Fe-oxide/hydroxide +
- 17:Chromite
- 18:Fe-oxide/hydroxide +

Figure B11.38: Sample S22 site 19 (SEM). The detrital minerals include: Fe-oxide/hydroxide, Chr, Grt, Ep, Ttn, Zrn, Ms, Qz, Ap, Chl.

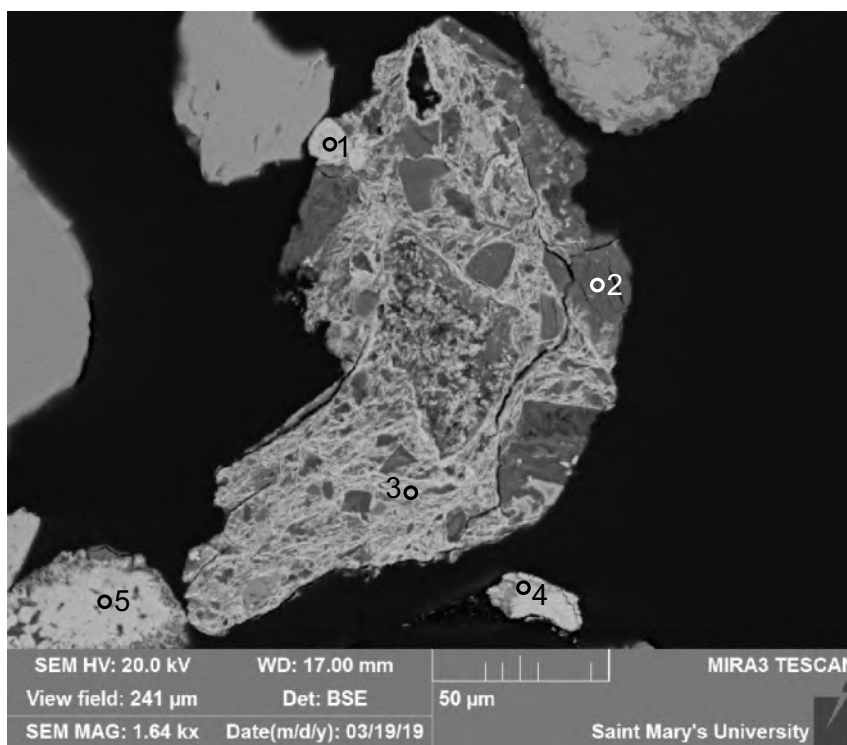

- 1:Fe-oxide/hydroxide +
- 2:Chlorite + Muscovite +
- 3:Fe-oxide/hydroxide +
- 4:Fe-oxide/hydroxide +
- 5:Fe-oxide/hydroxide +

Figure B11.39: Sample S22 site 19.1 (SEM). Pedogenic aggregate, or siltstone.

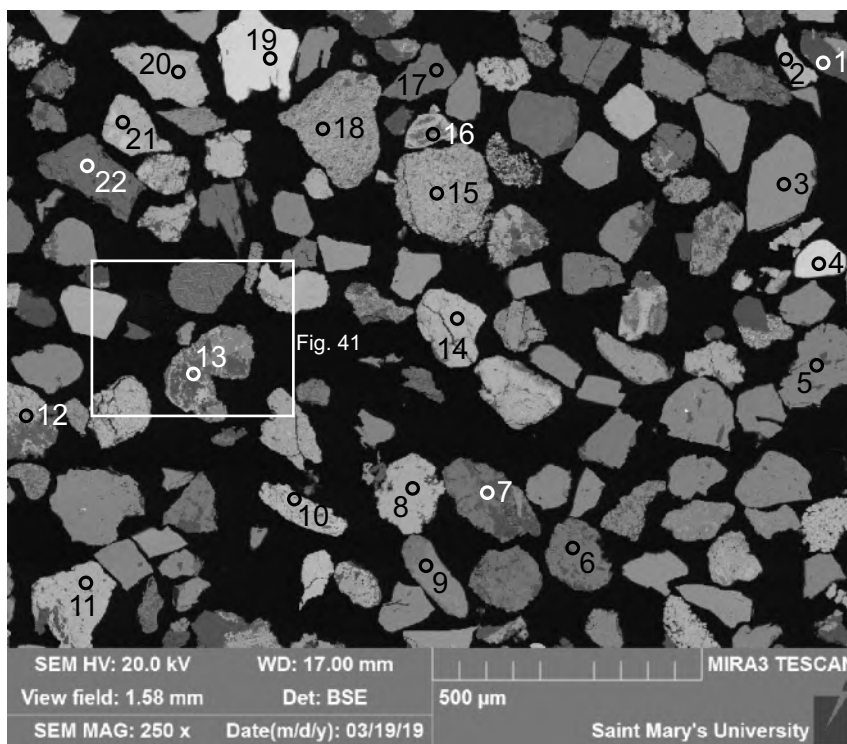

- 1:Quartz
- 2:Fe-oxide/hydroxide +
- 3:Spinel
- 4:Zircon
- 5:Garnet
- 6:Epidote
- 7:Epidote
- 8:Fe-oxide/hydroxide +
- 9:Titanite
- 10:Mn-oxide/hydroxide +
- 11:Fe-oxide/hydroxide +
- 12:Fe-oxide/hydroxide +
- 13:Quartz
- 14:Fe-oxide/hydroxide +
- 15:Fe-oxide/hydroxide +
- 16:Quartz +
- 17:Epidote
- 18:Fe-oxide/hydroxide + Chlorite
- 19:Zircon
- 20:Fe-oxide/hydroxide +
- 21:Quartz +
- 22:Quartz +

Figure B11.40: Sample S22 site 20 (SEM). The detrital minerals include: Fe-oxide/hydroxide, Spl, Grt, Ep, Ttn, Zrn, Ms, Qz, Ap, Chl. The Mnohy may be either detrital or pedogenic.

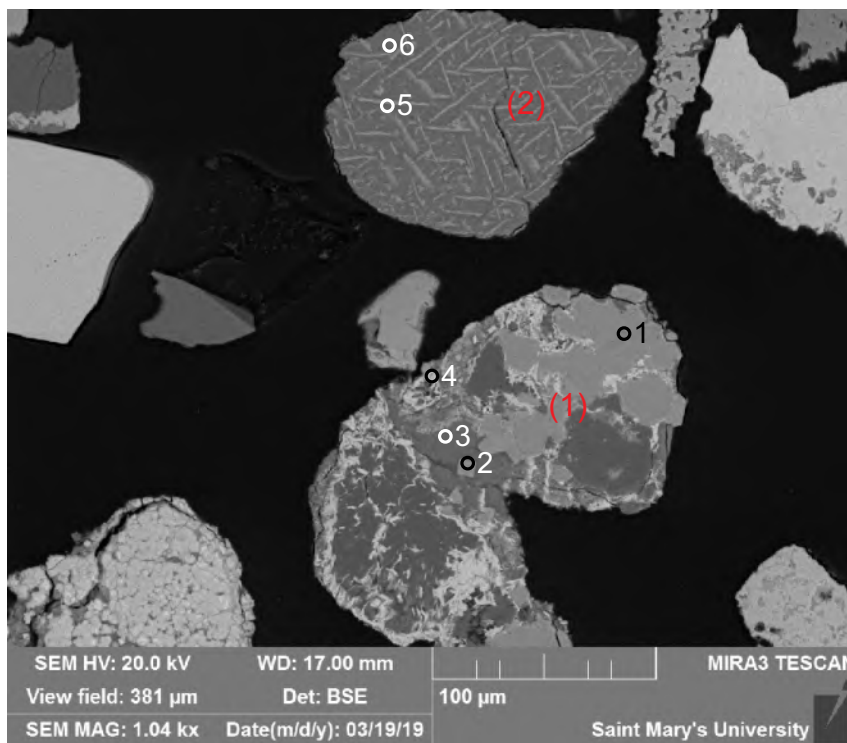

- 1:Apatite +
- 2:Apatite
- 3:Quartz + Muscovite
- 4:Fe-oxide/hydroxide +
- 5:Titanite +
- 6:Chlorite

Figure B11.41: Sample S22 site 20.1 (SEM). 1: Lithic clast (apatite cementing quartz + muscovite, sedimentary). 2: Detrital chlorite cross cut by titanite lamellae, probably retrograde metamorphic.



H:\Justin\Greek River Sands\Appendices\Appendix B\S22\Tables\Table B11.1.xlsx

1/10

Table B11.1: Mineral chemical analyses from sample S22.

| Sample | Site | Position | Mineral     | SiO2   | TiO2   | Al2O3  | FeO   | MnO   | MgO   | CaO   | Na2O  | K2O   | P2O5 | SO3   | F | V2O5 | Cr2O3 | CoO  | NiO | CuO | ZnO | As2O3 | Y2O3 | ZrO2  | Ag2O | SnO2 | BaO  | La2O3 | Ce2O3 | Nd2O3 | Gd2O3 | Dy2O3 | Yb2O3 | HfO2 | Ta2O5 | WO3 | OsO2 | IrO2 | Total | Actual | Total |
|--------|------|----------|-------------|--------|--------|--------|-------|-------|-------|-------|-------|-------|------|-------|---|------|-------|------|-----|-----|-----|-------|------|-------|------|------|------|-------|-------|-------|-------|-------|-------|------|-------|-----|------|------|-------|--------|-------|
| S22    | 2    | 11       | Py + Chl    | 16.53  |        | 7.14   | 52.87 |       | 6.41  | 1.26  |       |       |      | 15.33 |   |      | 0.45  |      |     |     |     |       |      |       |      |      |      |       |       |       |       |       |       |      |       |     |      |      | 100   | 92     |       |
| S22    | 2    | 12       | Ep +        | 45.46  |        | 29.36  | 4.45  |       | 2.90  | 16.01 | 1.82  |       |      |       |   |      |       |      |     |     |     |       |      |       |      |      |      |       |       |       |       |       |       |      |       |     |      |      | 100   | 117    |       |
| S22    | 2    | 13       | Chr         |        |        | 11.92  | 24.64 |       | 8.32  |       |       |       |      |       |   |      | 55.12 |      |     |     |     |       |      |       |      |      |      |       |       |       |       |       |       |      |       |     |      |      | 100   | 107    |       |
| S22    | 2    | 14       | TiO2 + Chl  | 14.65  | 72.55  | 8.75   | 1.26  |       |       |       |       | 2.78  |      |       |   |      |       |      |     |     |     |       |      |       |      |      |      |       |       |       |       |       |       |      |       |     |      |      | 100   | 106    |       |
| S22    | 2    | 15       | Mix         | 30.35  | 0.62   | 10.02  | 44.10 |       | 2.26  | 2.61  |       | 2.35  |      |       |   |      |       |      |     |     |     |       |      |       |      |      |      |       |       |       |       |       |       |      | 7.70  |     |      | 100  | 86    |        |       |
| S22    | 2    | 16       | Tur         | 38.08  | 0.65   | 32.69  | 6.14  |       | 6.71  | 0.64  | 2.09  |       |      |       |   |      |       |      |     |     |     |       |      |       |      |      |      |       |       |       |       |       |       |      |       |     |      | 87   | 100   |        |       |
| S22    | 2    | 17       | Feohy +     | 5.23   |        |        | 93.49 |       |       | 0.53  |       |       |      |       |   |      | 0.75  |      |     |     |     |       |      |       |      |      |      |       |       |       |       |       |       |      |       |     |      |      | 100   | 81     |       |
| S22    | 2    | 18       | Qz          | 99.60  |        |        | 0.40  |       |       |       |       |       |      |       |   |      |       |      |     |     |     |       |      |       |      |      |      |       |       |       |       |       |       |      |       |     |      | 100  | 119   |        |       |
| S22    | 2    | 19       | Feohy +     | 6.13   |        |        | 93.28 |       |       | 0.59  |       |       |      |       |   |      |       |      |     |     |     |       |      |       |      |      |      |       |       |       |       |       |       |      |       |     |      |      | 100   | 78     |       |
| S22    | 2    | 20       | Ep          | 40.30  |        | 26.35  | 8.23  |       |       | 22.13 |       |       |      |       |   |      |       |      |     |     |     |       |      |       |      |      |      |       |       |       |       |       |       |      |       |     |      |      | 97    | 106    |       |
| S22    | 2    | 21       | Feohy +     |        | 10.67  | 4.61   | 79.20 | 0.84  | 4.21  | 0.47  |       |       |      |       |   |      |       |      |     |     |     |       |      |       |      |      |      |       |       |       |       |       |       |      |       |     |      |      | 100   | 89     |       |
| S22    | 2    | 22       | Chl + Feohy | 27.74  | 0.46   | 9.33   | 42.57 |       | 14.19 | 1.05  | 0.66  |       |      | 4.00  |   |      |       |      |     |     |     |       |      |       |      |      |      |       |       |       |       |       |       |      |       |     |      |      | 100   | 86     |       |
| S22    | 2    | 23       | Qz          | 100.00 |        |        |       |       |       |       |       |       |      |       |   |      |       |      |     |     |     |       |      |       |      |      |      |       |       |       |       |       |       |      |       |     |      |      | 100   | 117    |       |
| S22    | 2    | 24       | Chl + Feohy |        | 1.10   | 3.81   | 55.84 |       | 4.53  | 0.58  |       | 0.29  |      |       |   |      |       |      |     |     |     |       |      |       |      |      |      |       |       |       |       |       |       |      |       |     |      |      | 100   | 96     |       |
| S22    | 2    | 25       | Feohy +     | 5.96   |        | 1.47   | 91.90 |       |       | 0.66  |       |       |      |       |   |      |       |      |     |     |     |       |      |       |      |      |      |       |       |       |       |       |       |      |       |     |      |      | 100   | 75     |       |
| S22    | 2    | 26       | Feohy +     | 15.20  |        | 7.33   | 66.61 |       | 7.42  | 0.97  |       |       |      | 2.48  |   |      |       |      |     |     |     |       |      |       |      |      |      |       |       |       |       |       |       |      |       |     |      |      | 100   | 81     |       |
| S22    | 2    | 27       | Mix         | 50.71  |        | 17.46  | 21.61 | 0.78  | 3.93  | 5.51  |       |       |      |       |   |      |       |      |     |     |     |       |      |       |      |      |      |       |       |       |       |       |       |      |       |     |      |      | 100   | 113    |       |
| S22    | 2    | 28       | Feohy +     | 5.49   |        | 2.52   | 91.45 |       |       | 0.55  |       |       |      |       |   |      |       |      |     |     |     |       |      |       |      |      |      |       |       |       |       |       |       |      |       |     |      |      | 100   | 66     |       |
| S22    | 2    | 29       | TiO2        |        | 100.00 |        |       |       |       |       |       |       |      |       |   |      |       |      |     |     |     |       |      |       |      |      |      |       |       |       |       |       |       |      |       |     |      |      | 100   | 95     |       |
| S22    | 2    | 30       | Feohy +     | 4.73   |        |        | 88.18 |       |       | 0.52  |       |       |      | 3.19  |   |      |       | 3.38 |     |     |     |       |      |       |      |      |      |       |       |       |       |       |       |      |       |     |      |      | 100   | 73     |       |
| S22    | 2.1  | 1        | Feohy +     | 8.60   |        | 2.85   | 85.77 | 0.98  | 0.93  | 0.88  |       |       |      |       |   |      |       |      |     |     |     |       |      |       |      |      |      |       |       |       |       |       |       |      |       |     |      |      | 100   | 79     |       |
| S22    | 2.1  | 2        | Ab          | 68.94  |        | 18.77  | 0.44  |       |       |       | 11.68 | 0.18  |      |       |   |      |       |      |     |     |     |       |      |       |      |      |      |       |       |       |       |       |       |      |       |     |      |      | 100   | 121    |       |
| S22    | 2.1  | 3        | Kfs         | 64.73  |        | 18.15  | 0.67  |       |       |       | 0.76  | 13.54 |      |       |   |      |       |      |     |     |     |       |      |       |      |      | 2.14 |       |       |       |       |       |       |      |       |     |      |      | 100   | 121    |       |
| S22    | 2.1  | 4        | Zrn         | 31.08  | 1.15   |        |       |       |       |       |       |       |      |       |   |      |       |      |     |     |     |       |      | 66.10 |      |      |      |       |       |       |       |       | 1.67  |      |       |     |      |      | 100   | 123    |       |
| S22    | 2.1  | 5        | TiO2        |        | 99.27  |        | 0.73  |       |       |       |       |       |      |       |   |      |       |      |     |     |     |       |      |       |      |      |      |       |       |       |       |       |       |      |       |     |      |      | 100   | 104    |       |
| S22    | 2.1  | 6        | Qz + Ms +   | 69.60  |        | 17.10  | 7.13  |       | 1.90  |       | 0.50  | 3.78  |      |       |   |      |       |      |     |     |     |       |      |       |      |      |      |       |       |       |       |       |       |      |       |     |      |      | 100   | 106    |       |
| S22    | 3    | 1        | Grt         | 39.88  |        | 21.26  | 32.06 | 1.17  | 3.73  | 1.90  |       |       |      |       |   |      |       |      |     |     |     |       |      |       |      |      |      |       |       |       |       |       |       |      |       |     |      |      | 100   | 109    |       |
| S22    | 3    | 2        | Zrn         | 30.81  |        |        | 0.42  |       |       |       |       |       |      |       |   |      |       |      |     |     |     |       |      | 68.77 |      |      |      |       |       |       |       |       |       |      |       |     |      |      | 100   | 117    |       |
| S22    | 3    | 3        | TiO2 +      | 1.41   | 95.79  |        | 0.88  |       |       | 1.92  |       |       |      |       |   |      |       |      |     |     |     |       |      |       |      |      |      |       |       |       |       |       |       |      |       |     |      |      | 100   | 101    |       |
| S22    | 3    | 4        | Feohy +     | 3.45   | 11.00  | 4.03   | 77.75 | 3.77  |       |       |       |       |      |       |   |      |       |      |     |     |     |       |      |       |      |      |      |       |       |       |       |       |       |      |       |     |      |      | 100   | 89     |       |
| S22    | 3    | 5        | Feohy +     | 5.07   |        |        | 92.07 |       |       | 2.86  |       |       |      |       |   |      |       |      |     |     |     |       |      |       |      |      |      |       |       |       |       |       |       |      |       |     |      |      | 100   | 73     |       |
| S22    | 3    | 6        | TiO2 +      | 2.27   | 94.22  | 0.66   | 2.20  |       | 0.65  |       |       |       |      |       |   |      |       |      |     |     |     |       |      |       |      |      |      |       |       |       |       |       |       |      |       |     |      |      | 100   | 97     |       |
| S22    | 3    | 7        | Zrn         | 31.43  |        |        |       |       |       |       |       |       |      |       |   |      |       |      |     |     |     |       |      | 68.57 |      |      |      |       |       |       |       |       |       |      |       |     |      |      | 100   | 109    |       |
| S22    | 3    | 8        | Pl (Lab)    | 51.97  |        | 26.23  | 3.10  |       |       | 13.03 | 5.67  |       |      |       |   |      |       |      |     |     |     |       |      |       |      |      |      |       |       |       |       |       |       |      |       |     |      |      | 100   | 93     |       |
| S22    | 3    | 9        | Chr         |        |        | 16.16  | 17.44 |       | 12.47 |       |       |       |      |       |   |      | 53.93 |      |     |     |     |       |      |       |      |      |      |       |       |       |       |       |       |      |       |     |      |      | 100   | 103    |       |
| S22    | 3    | 10       | Feohy +     | 5.54   |        |        | 93.82 |       |       | 0.64  |       |       |      |       |   |      |       |      |     |     |     |       |      |       |      |      |      |       |       |       |       |       |       |      |       |     |      |      | 100   | 78     |       |
| S22    | 3    | 11       | Feohy +     | 5.41   | 2.68   | 1.57   | 89.82 | 0.51  |       |       |       |       |      |       |   |      |       |      |     |     |     |       |      |       |      |      |      |       |       |       |       |       |       |      |       |     |      |      | 100   | 88     |       |
| S22    | 3    | 12       | Tur         | 38.50  | 0.61   | 32.97  | 4.15  |       | 7.99  | 0.97  | 1.81  |       |      |       |   |      |       |      |     |     |     |       |      |       |      |      |      |       |       |       |       |       |       |      |       |     |      |      | 87    | 101    |       |
| S22    | 3    | 13       | Mix         | 57.07  |        | 18.51  | 7.14  |       |       | 17.27 |       |       |      |       |   |      |       |      |     |     |     |       |      |       |      |      |      |       |       |       |       |       |       |      |       |     |      |      | 100   | 113    |       |
| S22    | 3    | 14       | Grt         | 40.41  |        | 21.10  | 25.61 | 1.27  | 2.53  | 9.08  |       |       |      |       |   |      |       |      |     |     |     |       |      |       |      |      |      |       |       |       |       |       |       |      |       |     |      |      | 100   | 115    |       |
| S22    | 3    | 15       | Feohy +     |        | 6.92   | 4.03   | 85.41 | 0.63  | 2.29  |       |       |       |      |       |   | 0.72 |       |      |     |     |     |       |      |       |      |      |      |       |       |       |       |       |       |      |       |     |      |      | 100   | 99     |       |
| S22    | 3    | 16       | Feohy +     | 4.38   |        |        | 95.02 |       |       | 0.60  |       |       |      |       |   |      |       |      |     |     |     |       |      |       |      |      |      |       |       |       |       |       |       |      |       |     |      |      | 100   | 80     |       |
| S22    | 3    | 17       | Grt         | 40.82  |        | 21.18  | 27.02 | 0.36  | 4.68  | 5.95  |       |       |      |       |   |      |       |      |     |     |     |       |      |       |      |      |      |       |       |       |       |       |       |      |       |     |      |      | 100   | 120    |       |
| S22    | 3    | 18       | Qz          | 99.36  |        |        | 0.64  |       |       |       |       |       |      |       |   |      |       |      |     |     |     |       |      |       |      |      |      |       |       |       |       |       |       |      |       |     |      |      | 100   | 126    |       |
| S22    | 3    | 19       | Grt         | 40.82  |        | 21.13  | 26.72 | 0.61  | 4.57  | 6.15  |       |       |      |       |   |      |       |      |     |     |     |       |      |       |      |      |      |       |       |       |       |       |       |      |       |     |      |      | 100   | 118    |       |
| S22    | 3    | 20       | Feohy +     | 2.14   | 3.89   | 1.17   | 92.15 | 0.65  |       |       |       |       |      |       |   |      |       |      |     |     |     |       |      |       |      |      |      |       |       |       |       |       |       |      |       |     |      |      | 100   | 95     |       |
| S22    | 3    | 21       | Grt         | 39.91  |        | 21.04  | 20.35 | 11.92 | 2.67  | 4.10  |       |       |      |       |   |      |       |      |     |     |     |       |      |       |      |      |      |       |       |       |       |       |       |      |       |     |      |      | 100   | 117    |       |
| S22    | 3    | 22       | Grt         | 42.15  |        | 24.77  | 10.37 |       |       | 22.71 |       |       |      |       |   |      |       |      |     |     |     |       |      |       |      |      |      |       |       |       |       |       |       |      |       |     |      |      | 100   | 110    |       |
| S22    | 3    | 23       | Zrn         | 30.92  |        |        | 0.45  |       |       |       |       |       |      |       |   |      |       |      |     |     |     |       |      | 68.63 |      |      |      |       |       |       |       |       |       |      |       |     |      |      | 100   | 120    |       |
| S22    | 3    | 24       | Tur         | 37.90  | 0.50   | 33.74  | 5.64  |       | 6.49  | 0.71  | 2.03  |       |      |       |   |      |       |      |     |     |     |       |      |       |      |      |      |       |       |       |       |       |       |      |       |     |      | 87   | 99    |        |       |
| S22    | 3    | 25       | Feohy +     | 5.05   |        |        | 94.95 |       |       |       |       |       |      |       |   |      |       |      |     |     |     |       |      |       |      |      |      |       |       |       |       |       |       |      |       |     |      |      | 100   | 76     |       |
| S22    | 3    | 26       | Feohy +     | 2.54   |        |        | 93.45 |       |       | 0.53  |       |       |      |       |   |      | 0.53  |      |     |     |     |       |      |       |      |      |      |       |       |       |       |       |       |      |       |     |      |      | 100   | 73     |       |
| S22    | 3    | 27       | Cpx         | 56.28  |        | 0.93   | 3.24  |       | 18.61 | 20.57 |       |       |      |       |   |      | 0.37  |      |     |     |     |       |      |       |      |      |      |       |       |       |       |       |       |      |       |     |      |      | 100   | 105    |       |
| S22    | 3    | 28       | Spl         |        |        | 38.53  | 14.51 |       | 17.21 |       |       |       |      |       |   |      | 29.75 |      |     |     |     |       |      |       |      |      |      |       |       |       |       |       |       |      |       |     |      |      | 100   | 98     |       |
| S22    | 3    | 29       | Feohy +     |        | 9.34   | 8.40   | 78.29 | 2.29  |       |       |       |       |      |       |   | 1.68 |       |      |     |     |     |       |      |       |      |      |      |       |       |       |       |       |       |      |       |     |      | 100  | 84    |        |       |
| S22    | 3    | 30       | Ep          | 33.08  |        | 22.81  | 19.42 |       | 21.24 | 0.45  |       |       |      |       |   |      |       |      |     |     |     |       |      |       |      |      |      |       |       |       |       |       |       |      |       |     |      | 97   | 94    |        |       |
| S22    | 3    | 31       | Qz + Feohy  | 47.18  | 0.93   | 4.06</ |       |       |       |       |       |       |      |       |   |      |       |      |     |     |     |       |      |       |      |      |      |       |       |       |       |       |       |      |       |     |      |      |       |        |       |

H:\Justin\Greek River Sands\Appendices\Appendix B\S22\Tables\Table B11.1.xlsx

3/10

Table B11.1: Mineral chemical analyses from sample S22.

| Sample | Site | Position | Mineral      | SiO2  | TiO2   | Al2O3  | FeO    | MnO   | MgO   | CaO   | Na2O  | K2O  | P2O5 | SO3 | F | V2O5 | Cr2O3 | CoO | NiO | CuO | ZnO | As2O3 | Y2O3 | ZrO2 | Ag2O | SnO2 | BaO | La2O3 | Ce2O3 | Nd2O3 | Gd2O3 | Dy2O3 | Yb2O3 | HfO2 | Ta2O5 | WO3 | OsO2 | IrO2 | Total | Actual | Total |     |  |
|--------|------|----------|--------------|-------|--------|--------|--------|-------|-------|-------|-------|------|------|-----|---|------|-------|-----|-----|-----|-----|-------|------|------|------|------|-----|-------|-------|-------|-------|-------|-------|------|-------|-----|------|------|-------|--------|-------|-----|--|
| S22    | 5.1  | 2        | Feohy +      | 2.48  | 7.01   |        | 89.84  | 0.67  |       |       |       |      |      |     |   |      |       |     |     |     |     |       |      |      |      |      |     |       |       |       |       |       |       |      |       |     |      |      | 100   | 87     |       |     |  |
| S22    | 5.1  | 3        | TiO2         | 0.88  | 96.24  |        | 2.87   |       |       |       |       |      |      |     |   |      |       |     |     |     |     |       |      |      |      |      |     |       |       |       |       |       |       |      |       |     |      |      |       | 100    | 100   |     |  |
| S22    | 5.1  | 4        | Feohy +      | 4.65  | 3.98   | 2.03   | 88.33  |       | 1.02  |       |       |      |      |     |   |      |       |     |     |     |     |       |      |      |      |      |     |       |       |       |       |       |       |      |       |     |      |      |       | 100    | 87    |     |  |
| S22    | 6    | 1        | Ep           | 40.21 |        | 22.18  | 12.50  |       |       | 22.10 |       |      |      |     |   |      |       |     |     |     |     |       |      |      |      |      |     |       |       |       |       |       |       |      |       |     |      |      |       | 97     | 113   |     |  |
| S22    | 6    | 2        | TiO2         |       | 100.00 |        |        |       |       |       |       |      |      |     |   |      |       |     |     |     |     |       |      |      |      |      |     |       |       |       |       |       |       |      |       |     |      |      |       | 100    | 106   |     |  |
| S22    | 6    | 3        | Grt          | 40.84 |        | 21.23  | 28.09  | 0.77  | 6.19  | 2.88  |       |      |      |     |   |      |       |     |     |     |     |       |      |      |      |      |     |       |       |       |       |       |       |      |       |     |      |      |       | 100    | 116   |     |  |
| S22    | 6    | 4        | Feohy +      | 5.11  |        | 1.68   | 92.72  |       |       | 0.49  |       |      |      |     |   |      |       |     |     |     |     |       |      |      |      |      |     |       |       |       |       |       |       |      |       |     |      |      |       | 100    | 78    |     |  |
| S22    | 6    | 5        | Ab + Chl     | 58.85 | 0.65   | 17.04  | 9.84   |       | 2.24  | 0.79  | 10.39 | 0.22 |      |     |   |      |       |     |     |     |     |       |      |      |      |      |     |       |       |       |       |       |       |      |       |     |      |      |       | 100    | 121   |     |  |
| S22    | 6    | 6        | Tur          | 38.65 | 0.54   | 32.22  | 4.69   |       | 8.09  | 0.71  | 2.10  |      |      |     |   |      |       |     |     |     |     |       |      |      |      |      |     |       |       |       |       |       |       |      |       |     |      |      | 87    | 104    |       |     |  |
| S22    | 6    | 7        | Grt          | 40.19 |        | 21.28  | 32.78  | 0.78  | 2.67  | 2.30  |       |      |      |     |   |      |       |     |     |     |     |       |      |      |      |      |     |       |       |       |       |       |       |      |       |     |      |      |       | 100    | 117   |     |  |
| S22    | 6    | 8        | Grt          | 40.80 |        | 21.43  | 26.06  |       | 2.96  | 8.74  |       |      |      |     |   |      |       |     |     |     |     |       |      |      |      |      |     |       |       |       |       |       |       |      |       |     |      |      |       | 100    | 117   |     |  |
| S22    | 6    | 9        | Qz           | 99.55 | 0.45   |        |        |       |       |       |       |      |      |     |   |      |       |     |     |     |     |       |      |      |      |      |     |       |       |       |       |       |       |      |       |     |      |      |       | 100    | 128   |     |  |
| S22    | 6    | 10       | Feohy +      | 9.74  |        | 2.98   | 84.62  | 0.54  | 1.17  |       |       | 0.93 |      |     |   |      |       |     |     |     |     |       |      |      |      |      |     |       |       |       |       |       |       |      |       |     |      |      |       | 100    | 83    |     |  |
| S22    | 6    | 11       | Qz + Chl     | 72.39 |        | 11.28  | 5.71   |       |       | 10.62 |       |      |      |     |   |      |       |     |     |     |     |       |      |      |      |      |     |       |       |       |       |       |       |      |       |     |      |      |       |        | 100   | 120 |  |
| S22    | 6    | 12       | Feohy +      | 3.80  |        | 1.03   | 91.92  |       |       |       |       |      |      |     |   |      |       |     |     |     |     |       |      |      |      |      |     |       |       |       |       |       |       |      |       |     |      |      |       | 100    | 90    |     |  |
| S22    | 6    | 13       | Feohy +      |       | 10.07  | 4.17   | 79.42  | 5.52  |       |       |       |      |      |     |   | 0.82 |       |     |     |     |     |       |      |      |      |      |     |       |       |       |       |       |       |      |       |     |      |      |       | 100    | 100   |     |  |
| S22    | 6    | 14       | Pl (Lab)     | 56.09 |        | 24.79  | 1.52   |       |       | 11.61 | 5.98  |      |      |     |   |      |       |     |     |     |     |       |      |      |      |      |     |       |       |       |       |       |       |      |       |     |      |      |       |        | 100   | 120 |  |
| S22    | 6    | 15       | "Chr"        |       |        | 10.44  | 34.19  |       | 5.20  |       |       |      |      |     |   | 0.53 | 49.64 |     |     |     |     |       |      |      |      |      |     |       |       |       |       |       |       |      |       |     |      |      |       | 100    | 105   |     |  |
| S22    | 6    | 16       | Feohy +      | 8.63  |        | 4.10   | 83.61  |       | 1.98  | 0.62  | 1.07  |      |      |     |   |      |       |     |     |     |     |       |      |      |      |      |     |       |       |       |       |       |       |      |       |     |      |      |       |        | 100   | 79  |  |
| S22    | 6    | 17       | Feohy        |       |        |        | 100.00 |       |       |       |       |      |      |     |   |      |       |     |     |     |     |       |      |      |      |      |     |       |       |       |       |       |       |      |       |     |      |      |       | 100    | 96    |     |  |
| S22    | 6    | 18       | Ilm +        | 7.44  | 50.61  |        | 32.09  | 4.60  | 0.82  | 4.44  |       |      |      |     |   |      |       |     |     |     |     |       |      |      |      |      |     |       |       |       |       |       |       |      |       |     |      |      |       | 100    | 105   |     |  |
| S22    | 6    | 19       | Feohy +      | 4.50  |        | 2.99   | 85.57  |       | 1.10  | 0.52  |       |      |      |     |   |      | 1.75  |     |     |     |     |       |      |      |      |      |     |       |       |       |       |       |       |      |       |     |      |      |       | 100    | 73    |     |  |
| S22    | 6    | 20       | Chr          |       |        | 6.42   | 22.61  |       | 7.53  |       |       |      |      |     |   |      | 63.45 |     |     |     |     |       |      |      |      |      |     |       |       |       |       |       |       |      |       |     |      |      |       | 100    | 107   |     |  |
| S22    | 6    | 21       | Qz +         | 93.04 |        | 2.15   | 3.58   |       | 1.22  |       |       |      |      |     |   |      |       |     |     |     |     |       |      |      |      |      |     |       |       |       |       |       |       |      |       |     |      |      |       | 100    | 122   |     |  |
| S22    | 6    | 22       | Chr          |       | 1.23   | 23.06  | 26.08  |       | 12.44 |       |       |      |      |     |   |      | 37.20 |     |     |     |     |       |      |      |      |      |     |       |       |       |       |       |       |      |       |     |      |      |       | 100    | 108   |     |  |
| S22    | 6    | 23       | Feohy +      | 5.23  |        |        | 94.77  |       |       |       |       |      |      |     |   |      |       |     |     |     |     |       |      |      |      |      |     |       |       |       |       |       |       |      |       |     |      |      |       | 100    | 76    |     |  |
| S22    | 6    | 24       | Chr          |       |        | 25.57  | 15.48  |       | 15.41 |       |       |      |      |     |   |      | 43.54 |     |     |     |     |       |      |      |      |      |     |       |       |       |       |       |       |      |       |     |      |      |       | 100    | 106   |     |  |
| S22    | 6    | 25       | Ep           | 40.40 |        | 24.38  | 9.84   | 0.45  |       | 21.94 |       |      |      |     |   |      |       |     |     |     |     |       |      |      |      |      |     |       |       |       |       |       |       |      |       |     |      |      |       | 97     | 103   |     |  |
| S22    | 6    | 26       | Feohy +      | 4.93  |        |        | 94.42  |       |       | 0.66  |       |      |      |     |   |      |       |     |     |     |     |       |      |      |      |      |     |       |       |       |       |       |       |      |       |     |      |      |       | 100    | 79    |     |  |
| S22    | 6    | 27       | Feohy +      | 11.37 |        | 2.66   | 85.37  |       |       | 0.61  |       |      |      |     |   |      |       |     |     |     |     |       |      |      |      |      |     |       |       |       |       |       |       |      |       |     |      |      |       | 100    | 76    |     |  |
| S22    | 6.1  | 1        | Feohy +      | 10.14 |        | 2.63   | 71.17  |       |       | 1.25  | 1.48  |      |      |     |   |      |       |     |     |     |     |       |      |      |      |      |     |       |       |       |       |       |       |      |       |     |      |      |       | 100    | 70    |     |  |
| S22    | 6.1  | 2        | Feohy +      | 6.82  |        |        | 93.18  |       |       |       |       |      |      |     |   |      |       |     |     |     |     |       |      |      |      |      |     |       |       |       |       |       |       |      |       |     |      |      |       | 100    | 79    |     |  |
| S22    | 6.1  | 3        | Feohy +      | 6.28  |        | 1.54   | 84.11  |       |       | 0.69  |       |      |      |     |   |      | 0.84  |     |     |     |     |       |      |      |      |      |     |       |       |       |       |       |       |      |       |     |      |      |       | 100    | 72    |     |  |
| S22    | 6.1  | 4        | Ms +         | 61.29 | 1.31   | 16.31  | 11.82  |       | 3.26  |       | 0.67  | 5.33 |      |     |   |      |       |     |     |     |     |       |      |      |      |      |     |       |       |       |       |       |       |      |       |     |      |      |       | 100    | 105   |     |  |
| S22    | 6.1  | 5        | Feohy +      | 5.95  |        |        | 94.05  |       |       |       |       |      |      |     |   |      |       |     |     |     |     |       |      |      |      |      |     |       |       |       |       |       |       |      |       |     |      |      |       | 100    | 77    |     |  |
| S22    | 6.2  | 1        | Ilm          |       | 50.59  |        | 48.02  | 1.38  |       |       |       |      |      |     |   |      |       |     |     |     |     |       |      |      |      |      |     |       |       |       |       |       |       |      |       |     |      |      |       | 100    | 102   |     |  |
| S22    | 6.2  | 2        | Tin          | 33.60 | 36.05  | 1.94   | 1.28   |       |       | 27.13 |       |      |      |     |   |      |       |     |     |     |     |       |      |      |      |      |     |       |       |       |       |       |       |      |       |     |      |      |       | 100    | 109   |     |  |
| S22    | 6.2  | 3        | Unknown ?Met | 54.67 |        | 8.27   | 10.22  |       | 23.52 | 1.68  | 1.38  | 0.26 |      |     |   |      |       |     |     |     |     |       |      |      |      |      |     |       |       |       |       |       |       |      |       |     |      |      |       | 100    | 88    |     |  |
| S22    | 6.2  | 4        | Ab +         | 70.12 |        | 18.31  |        |       |       |       | 11.57 |      |      |     |   |      |       |     |     |     |     |       |      |      |      |      |     |       |       |       |       |       |       |      |       |     |      |      |       |        | 100   | 116 |  |
| S22    | 7    | 1        | Feohy +      | 4.73  |        |        | 93.30  |       |       | 0.58  |       |      |      |     |   |      |       |     |     |     |     | 1.39  |      |      |      |      |     |       |       |       |       |       |       |      |       |     |      |      |       |        | 100   | 79  |  |
| S22    | 7    | 2        | Grt          | 39.83 |        | 21.13  | 26.19  | 6.37  | 2.62  | 3.86  |       |      |      |     |   |      |       |     |     |     |     |       |      |      |      |      |     |       |       |       |       |       |       |      |       |     |      |      |       | 100    | 113   |     |  |
| S22    | 7    | 3        | Ep           | 40.56 |        | 23.21  | 11.07  |       |       | 22.16 |       |      |      |     |   |      |       |     |     |     |     |       |      |      |      |      |     |       |       |       |       |       |       |      |       |     |      |      |       | 97     | 110   |     |  |
| S22    | 7    | 4        | Feohy +      | 1.80  |        |        |        | 98.20 |       |       |       |      |      |     |   |      |       |     |     |     |     |       |      |      |      |      |     |       |       |       |       |       |       |      |       |     |      |      |       | 100    | 79    |     |  |
| S22    | 7    | 5        | TiO2 +       | 33.50 | 58.89  | 2.28   | 1.79   |       | 1.50  | 0.42  |       | 0.38 | 1.24 |     |   |      |       |     |     |     |     |       |      |      |      |      |     |       |       |       |       |       |       |      |       |     |      |      |       | 100    | 109   |     |  |
| S22    | 7    | 6        | Chr          |       |        | 21.43  | 18.31  |       | 13.25 |       |       |      |      |     |   |      | 47.01 |     |     |     |     |       |      |      |      |      |     |       |       |       |       |       |       |      |       |     |      |      |       | 100    | 113   |     |  |
| S22    | 7    | 7        | Spl          |       |        | 36.82  | 18.54  |       | 15.94 |       |       |      |      |     |   |      | 28.70 |     |     |     |     |       |      |      |      |      |     |       |       |       |       |       |       |      |       |     |      |      |       | 100    | 114   |     |  |
| S22    | 7    | 8        | Feohy + Chl  | 19.17 |        | 8.07   | 63.38  |       | 6.74  | 0.86  | 1.30  | 0.48 |      |     |   |      |       |     |     |     |     |       |      |      |      |      |     |       |       |       |       |       |       |      |       |     |      |      |       | 100    | 93    |     |  |
| S22    | 7    | 9        | Grt          | 40.62 |        | 21.32  | 29.58  | 1.43  | 4.14  | 2.91  |       |      |      |     |   |      |       |     |     |     |     |       |      |      |      |      |     |       |       |       |       |       |       |      |       |     |      |      |       | 100    | 115   |     |  |
| S22    | 7    | 10       | Feohy +      | 5.17  |        |        | 94.83  |       |       |       |       |      |      |     |   |      |       |     |     |     |     |       |      |      |      |      |     |       |       |       |       |       |       |      |       |     |      |      |       | 100    | 78    |     |  |
| S22    | 7    | 11       | Tin          | 30.35 | 38.26  | 3.46   | 0.71   |       |       | 24.85 |       |      |      |     |   | 2.37 |       |     |     |     |     |       |      |      |      |      |     |       |       |       |       |       |       |      |       |     |      |      |       | 100    | 108   |     |  |
| S22    | 7    | 12       | Feohy +      | 6.90  | 1.78   | 3.34   | 87.38  |       |       | 0.59  |       |      |      |     |   |      |       |     |     |     |     |       |      |      |      |      |     |       |       |       |       |       |       |      |       |     |      |      |       | 100    | 84    |     |  |
| S22    | 7    | 13       | TiO2 +       | 3.61  | 85.82  | 2.69   | 6.85   |       | 1.03  |       |       |      |      |     |   |      |       |     |     |     |     |       |      |      |      |      |     |       |       |       |       |       |       |      |       |     |      |      |       | 100    | 93    |     |  |
| S22    | 7    | 14       | Zrn          | 30.92 |        |        | 0.48   |       |       |       |       |      |      |     |   |      |       |     |     |     |     |       |      |      |      |      |     |       |       |       |       |       |       |      |       |     |      |      |       | 100    | 112   |     |  |
| S22    | 7    | 15       | Feohy +      | 6.22  | 0.88   | 2.81   | 89.29  |       |       |       |       | 0.38 |      |     |   |      | 0.42  |     |     |     |     |       |      |      |      |      |     |       |       |       |       |       |       |      |       |     |      |      |       | 100    | 83    |     |  |
| S22    | 7    | 16       | TiO2 +       | 3.74  | 93.89  | 0.79</ |        |       |       |       |       |      |      |     |   |      |       |     |     |     |     |       |      |      |      |      |     |       |       |       |       |       |       |      |       |     |      |      |       |        |       |     |  |

H:\Justin\Greek River Sands\Appendices\Appendix B\S22\Tables\Table B11.1.xlsx

5/10



Table B11.1: Mineral chemical analyses from sample S22.

| Sample | Site | Position | Mineral    | SiO2  | TiO2  | Al2O3 | FeO   | MnO   | MgO   | CaO   | Na2O  | K2O  | P2O5 | SO3  | F     | V2O5 | Cr2O3 | CoO | NiO | CuO | ZnO | As2O3 | Y2O3  | ZrO2  | Ag2O | SnO2 | BaO | La2O3 | Ce2O3 | Nd2O3 | Gd2O3 | Dy2O3 | Yb2O3 | HfO2 | Ta2O5 | WO3 | OsO2 | IrO2 | Total | Actual Total |
|--------|------|----------|------------|-------|-------|-------|-------|-------|-------|-------|-------|------|------|------|-------|------|-------|-----|-----|-----|-----|-------|-------|-------|------|------|-----|-------|-------|-------|-------|-------|-------|------|-------|-----|------|------|-------|--------------|
| S22    | 9    | 29       | Grt        | 38.87 |       | 20.03 | 12.35 | 22.33 |       | 4.01  |       |      |      |      | 2.42  |      |       |     |     |     |     |       |       |       |      |      |     |       |       |       |       |       |       |      |       |     |      |      | 100   | 102          |
| S22    | 9    | 30       | Feohy +    | 6.85  |       |       | 92.65 |       |       | 0.50  |       |      |      |      |       |      |       |     |     |     |     |       |       |       |      |      |     |       |       |       |       |       |       |      |       |     |      |      | 100   | 70           |
| S22    | 9    | 31       | Feohy +    | 8.84  |       | 4.05  | 87.11 |       |       |       |       |      |      |      |       |      |       |     |     |     |     |       |       |       |      |      |     |       |       |       |       |       |       |      |       |     |      | 100  | 64    |              |
| S22    | 9.1  | 1        | Ms         | 47.92 | 0.35  | 34.30 | 1.21  |       | 0.69  |       | 1.42  | 9.11 |      |      |       |      |       |     |     |     |     |       |       |       |      |      |     |       |       |       |       |       |       |      |       |     |      |      | 95    | 109          |
| S22    | 9.1  | 2        | TiO2 +     | 1.66  | 96.02 | 0.86  | 0.98  |       | 0.47  |       |       |      |      |      |       |      |       |     |     |     |     |       |       |       |      |      |     |       |       |       |       |       |       |      |       |     |      |      | 100   | 105          |
| S22    | 9.1  | 3        | Feohy +    | 10.28 | 1.33  | 4.58  | 79.83 |       | 3.13  | 0.85  |       |      |      |      |       |      |       |     |     |     |     |       |       |       |      |      |     |       |       |       |       |       |       |      |       |     |      |      | 100   | 86           |
| S22    | 9.1  | 4        | Mix        | 28.79 | 3.64  | 10.57 | 40.83 |       | 8.04  | 7.18  |       | 0.95 |      |      |       |      |       |     |     |     |     |       |       |       |      |      |     |       |       |       |       |       |       |      |       |     |      |      | 100   | 99           |
| S22    | 9.1  | 5        | Ab         | 66.93 |       | 19.67 | 0.79  |       |       | 1.68  | 10.93 |      |      |      |       |      |       |     |     |     |     |       |       |       |      |      |     |       |       |       |       |       |       |      |       |     |      |      | 100   | 118          |
| S22    | 10   | 1        | Ep         | 45.87 |       | 23.54 | 7.04  |       |       | 20.54 |       |      |      |      |       |      |       |     |     |     |     |       |       |       |      |      |     |       |       |       |       |       |       |      |       |     |      |      | 97    | 106          |
| S22    | 10   | 2        | Ep         | 41.32 |       | 27.51 | 3.15  |       | 3.01  | 22.01 |       |      |      |      |       |      |       |     |     |     |     |       |       |       |      |      |     |       |       |       |       |       |       |      |       |     |      |      | 97    | 98           |
| S22    | 10   | 3        | Chr        |       |       | 15.62 | 18.81 |       | 11.73 |       |       |      |      |      |       |      | 53.85 |     |     |     |     |       |       |       |      |      |     |       |       |       |       |       |       |      |       |     |      |      | 100   | 101          |
| S22    | 10   | 4        | Tur        | 38.32 | 0.66  | 33.20 | 5.53  |       | 6.60  | 0.67  | 2.02  |      |      |      |       |      |       |     |     |     |     |       |       |       |      |      |     |       |       |       |       |       |       |      |       |     |      |      | 87    | 96           |
| S22    | 10   | 5        | Feohy +    | 4.54  |       | 1.07  | 93.46 |       |       |       |       |      |      |      |       |      | 0.93  |     |     |     |     |       |       |       |      |      |     |       |       |       |       |       |       |      |       |     |      |      | 100   | 72           |
| S22    | 10   | 6        | Grt        | 40.05 |       | 21.10 | 30.12 | 0.53  | 2.70  | 5.50  |       |      |      |      |       |      |       |     |     |     |     |       |       |       |      |      |     |       |       |       |       |       |       |      |       |     |      |      | 100   | 111          |
| S22    | 10   | 7        | Feohy +    | 5.88  |       | 1.36  | 92.76 |       |       |       |       |      |      |      |       |      |       |     |     |     |     |       |       |       |      |      |     |       |       |       |       |       |       |      |       |     |      |      | 100   | 78           |
| S22    | 10   | 8        | Feohy +    | 4.87  |       |       | 94.02 |       |       | 0.65  |       |      |      |      |       |      | 0.45  |     |     |     |     |       |       |       |      |      |     |       |       |       |       |       |       |      |       |     |      |      | 100   | 84           |
| S22    | 10   | 9        | Feohy +    | 5.92  |       |       | 92.87 |       | 1.21  |       |       |      |      |      |       |      |       |     |     |     |     |       |       |       |      |      |     |       |       |       |       |       |       |      |       |     |      |      | 100   | 78           |
| S22    | 10   | 10       | Qz +       | 89.73 |       | 4.63  | 3.03  |       | 1.37  | 0.32  | 0.46  | 0.46 |      |      |       |      |       |     |     |     |     |       |       |       |      |      |     |       |       |       |       |       |       |      |       |     |      |      | 100   | 118          |
| S22    | 10   | 11       | Qz         | 99.11 |       |       | 0.89  |       |       |       |       |      |      |      |       |      |       |     |     |     |     |       |       |       |      |      |     |       |       |       |       |       |       |      |       |     |      |      | 100   | 122          |
| S22    | 10   | 12       | Feohy +    | 7.50  |       | 4.36  | 86.24 | 0.63  |       |       |       |      | 1.27 |      |       |      |       |     |     |     |     |       |       |       |      |      |     |       |       |       |       |       |       |      |       |     |      |      | 100   | 76           |
| S22    | 10   | 13       | Zrn        | 31.30 |       |       |       |       |       |       |       |      |      |      |       |      |       |     |     |     |     |       |       | 68.70 |      |      |     |       |       |       |       |       |       |      |       |     |      |      | 100   | 117          |
| S22    | 10   | 14       | Zrn        | 31.25 |       |       |       |       |       |       |       |      |      |      |       |      |       |     |     |     |     |       |       | 68.75 |      |      |     |       |       |       |       |       |       |      |       |     |      |      | 100   | 111          |
| S22    | 10   | 15       | Cpx        | 53.19 | 0.64  | 3.85  | 6.10  |       | 17.02 | 19.20 |       |      |      |      |       |      |       |     |     |     |     |       |       |       |      |      |     |       |       |       |       |       |       |      |       |     |      |      | 100   | 114          |
| S22    | 10   | 16       | Feohy +    | 5.94  |       |       | 93.50 |       |       | 0.56  |       |      |      |      |       |      |       |     |     |     |     |       |       |       |      |      |     |       |       |       |       |       |       |      |       |     |      |      | 100   | 73           |
| S22    | 10   | 17       | Grt        | 39.88 |       | 21.15 | 26.40 | 3.00  | 0.89  | 8.69  |       |      |      |      |       |      |       |     |     |     |     |       |       |       |      |      |     |       |       |       |       |       |       |      |       |     |      |      | 100   | 108          |
| S22    | 10   | 18       | Feohy +    | 3.10  |       |       | 96.38 |       |       | 0.52  |       |      |      |      |       |      |       |     |     |     |     |       |       |       |      |      |     |       |       |       |       |       |       |      |       |     |      |      | 100   | 75           |
| S22    | 10   | 19       | Feohy +    | 5.59  |       |       | 93.85 |       |       | 0.56  |       |      |      |      |       |      |       |     |     |     |     |       |       |       |      |      |     |       |       |       |       |       |       |      |       |     |      |      | 100   | 77           |
| S22    | 10   | 20       | Zrn        | 31.27 |       |       |       |       |       |       |       |      |      |      |       |      |       |     |     |     |     |       |       | 68.73 |      |      |     |       |       |       |       |       |       |      |       |     |      |      | 100   | 113          |
| S22    | 10   | 21       | Ab +       | 78.34 |       | 12.52 |       |       |       |       | 9.13  |      |      |      |       |      |       |     |     |     |     |       |       |       |      |      |     |       |       |       |       |       |       |      |       |     |      |      | 100   | 110          |
| S22    | 10   | 22       | Feohy +    | 5.23  |       |       | 93.59 | 0.66  |       | 0.52  |       |      |      |      |       |      |       |     |     |     |     |       |       |       |      |      |     |       |       |       |       |       |       |      |       |     |      |      | 100   | 73           |
| S22    | 10   | 23       | ?          |       | 1.04  |       |       |       |       |       |       |      |      |      |       |      | 1.65  |     |     |     |     |       | -7.08 |       |      |      |     |       |       |       |       |       |       |      |       |     |      |      | 100   | 109          |
| S22    | 10   | 24       | Ms         | 48.55 | 0.51  | 30.52 | 1.44  |       | 1.22  |       | 0.83  | 8.64 |      |      | 3.30  |      |       |     |     |     |     |       |       |       |      |      |     |       |       |       |       |       |       |      |       |     |      |      | 95    | 111          |
| S22    | 10   | 25       | Feohy +    | 13.58 |       | 5.70  | 75.54 |       | 3.45  | 0.59  |       | 0.44 |      |      |       |      | 0.70  |     |     |     |     |       |       |       |      |      |     |       |       |       |       |       |       |      |       |     |      |      | 100   | 77           |
| S22    | 10   | 26       | Ep         | 40.51 |       | 23.65 | 10.80 |       | 22.05 |       |       |      |      |      |       |      |       |     |     |     |     |       |       |       |      |      |     |       |       |       |       |       |       |      |       |     |      |      | 97    | 104          |
| S22    | 10   | 27       | Feohy +    | 4.63  |       | 3.20  | 85.02 |       | 0.81  |       |       |      |      |      |       |      | 0.56  |     |     |     |     |       |       |       |      |      |     |       |       |       |       |       |       |      |       |     |      |      | 100   | 79           |
| S22    | 10   | 28       | Chr        |       |       | 26.49 | 17.74 |       | 14.21 |       |       |      |      |      |       |      | 41.57 |     |     |     |     |       |       |       |      |      |     |       |       |       |       |       |       |      |       |     |      |      | 100   | 105          |
| S22    | 10   | 29       | Chr        |       |       | 29.53 | 16.77 |       | 14.71 |       |       |      |      |      |       |      | 38.99 |     |     |     |     |       |       |       |      |      |     |       |       |       |       |       |       |      |       |     |      |      | 100   | 103          |
| S22    | 10   | 30       | Chr        |       |       | 15.26 | 23.47 |       | 8.96  |       |       |      |      |      |       |      | 52.31 |     |     |     |     |       |       |       |      |      |     |       |       |       |       |       |       |      |       |     |      |      | 100   | 96           |
| S22    | 10   | 31       | Chr        | 5.10  |       | 11.09 | 28.86 |       | 10.05 |       |       |      |      |      |       |      | 44.90 |     |     |     |     |       |       |       |      |      |     |       |       |       |       |       |       |      |       |     |      |      | 100   | 90           |
| S22    | 10   | 32       | Feohy +    | 6.84  |       | 1.01  | 91.66 |       |       | 0.49  |       |      |      |      |       |      |       |     |     |     |     |       |       |       |      |      |     |       |       |       |       |       |       |      |       |     |      |      | 100   | 69           |
| S22    | 10   | 33       | Ep         | 40.54 |       | 27.73 | 6.27  |       | 22.47 |       |       |      |      |      |       |      |       |     |     |     |     |       |       |       |      |      |     |       |       |       |       |       |       |      |       |     |      |      | 97    | 99           |
| S22    | 10   | 34       | Ep         | 44.56 |       | 29.26 | 1.62  |       | 19.72 | 1.84  |       |      |      |      |       |      |       |     |     |     |     |       |       |       |      |      |     |       |       |       |       |       |       |      |       |     |      |      | 97    | 102          |
| S22    | 10   | 35       | Chr        |       |       | 10.47 | 21.15 |       | 9.19  |       |       |      |      |      |       |      | 59.18 |     |     |     |     |       |       |       |      |      |     |       |       |       |       |       |       |      |       |     |      |      | 100   | 96           |
| S22    | 10   | 36       | Feohy +    | 10.80 |       | 3.21  | 84.12 |       | 0.87  |       |       |      |      |      |       |      | 1.00  |     |     |     |     |       |       |       |      |      |     |       |       |       |       |       |       |      |       |     |      |      | 100   | 67           |
| S22    | 10   | 37       | Ilm        |       | 41.95 |       | 53.24 | 1.61  | 3.20  |       |       |      |      |      |       |      |       |     |     |     |     |       |       |       |      |      |     |       |       |       |       |       |       |      |       |     |      |      | 100   | 86           |
| S22    | 10   | 38       | Feohy +    | 7.44  |       | 3.28  | 87.66 |       | 0.98  | 0.64  |       |      |      |      |       |      |       |     |     |     |     |       |       |       |      |      |     |       |       |       |       |       |       |      |       |     |      |      | 100   | 64           |
| S22    | 10.1 | 1        | Feohy +    | 5.59  |       |       | 93.92 |       | 0.49  |       |       |      |      |      |       |      |       |     |     |     |     |       |       |       |      |      |     |       |       |       |       |       |       |      |       |     |      |      | 100   | 73           |
| S22    | 10.1 | 2        | Feohy +    | 6.63  |       | 4.03  | 88.71 |       |       | 0.64  |       |      |      |      |       |      |       |     |     |     |     |       |       |       |      |      |     |       |       |       |       |       |       |      |       |     |      |      | 100   | 72           |
| S22    | 10.1 | 3        | Chl + Ms + | 45.34 | 0.84  | 19.13 | 22.09 |       | 2.55  | 0.59  | 1.60  | 4.77 |      | 3.09 |       |      |       |     |     |     |     |       |       |       |      |      |     |       |       |       |       |       |       |      |       |     |      |      | 100   | 83           |
| S22    | 10.1 | 4        | Qz         | 99.27 |       |       | 0.73  |       |       |       |       |      |      |      |       |      |       |     |     |     |     |       |       |       |      |      |     |       |       |       |       |       |       |      |       |     |      |      | 100   | 117          |
| S22    | 10.2 | 1        | Chr        |       |       | 5.65  | 31.13 |       | 6.11  | 0.69  |       |      |      |      |       |      | 56.42 |     |     |     |     |       |       |       |      |      |     |       |       |       |       |       |       |      |       |     |      |      | 100   | 100          |
| S22    | 10.2 | 2        | Cal +      | 1.12  | 1.21  |       | 0.93  | 11.77 |       | 1.18  | 60.23 |      |      |      | 23.57 |      |       |     |     |     |     |       |       |       |      |      |     |       |       |       |       |       |       |      |       |     |      |      | 100   | 74           |
| S22    | 10.2 | 3        | Chr        |       |       | 25.56 | 15.78 |       | 14.94 | 0.46  |       |      |      |      |       |      | 43.25 |     |     |     |     |       |       |       |      |      |     |       |       |       |       |       |       |      |       |     |      |      | 100   | 105          |
| S22    | 10.2 | 4        | Feohy      |       | 1.38  |       | 89.98 | 1.05  |       | 6.68  |       |      |      |      |       |      | 0.91  |     |     |     |     |       |       |       |      |      |     |       |       |       |       |       |       |      |       |     |      |      | 100   | 80           |
| S22    | 10.2 | 5        | Ab         | 67.29 |       | 18.96 | 0.89  |       | 2.10  |       | 10.76 |      |      |      |       |      |       |     |     |     |     |       |       |       |      |      |     |       |       |       |       |       |       |      |       |     |      |      | 100   | 112          |
| S22    | 10.2 | 6        | Spl        |       | 1.30  | 30.76 | 19.18 |       | 13.73 |       |       |      |      |      |       |      | 35.03 |     |     |     |     |       |       |       |      |      |     |       |       |       |       |       |       |      |       |     |      |      | 100   | 114          |
| S22    | 10.2 | 7        | Ilm        |       | 58.33 |       |       |       |       |       |       |      |      |      |       |      |       |     |     |     |     |       |       |       |      |      |     |       |       |       |       |       |       |      |       |     |      |      |       |              |

H:\Justin\Greek River Sands\Appendices\Appendix B\S22\Tables\Table B11.1.xlsx

7/10

H:\Justin\Greek River Sands\Appendices\Appendix B\S22\Tables\Table B11.1.xlsx

8/10

H:\Justin\Greek River Sands\Appendices\Appendix B\S22\Tables\Table B11.1.xlsx

9/10

Table B11.1: Mineral chemical analyses from sample S22.

| Sample | Site | Position | Mineral                                     | SiO2  | TiO2  | Al2O3 | FeO   | MnO   | MgO   | CaO   | Na2O | K2O  | P2O5  | SO3  | F    | V2O5 | Cr2O3 | CoO | NiO | CuO  | ZnO | As2O3 | Y2O3 | ZrO2  | Ag2O | SnO2 | BaO   | La2O3 | Ce2O3 | Nd2O3 | Gd2O3 | Dy2O3 | Yb2O3 | HfO2 | Ta2O5 | WO3 | OsO2 | IrO2 | Total | Actual Total |     |     |
|--------|------|----------|---------------------------------------------|-------|-------|-------|-------|-------|-------|-------|------|------|-------|------|------|------|-------|-----|-----|------|-----|-------|------|-------|------|------|-------|-------|-------|-------|-------|-------|-------|------|-------|-----|------|------|-------|--------------|-----|-----|
| S22    | 19   | 18       | Feohy +                                     | 7.12  |       | 3.57  | 78.66 |       | 1.22  | 0.91  |      |      |       |      |      |      | 0.72  |     |     |      |     |       |      |       |      |      |       |       |       |       |       |       |       |      |       |     |      |      |       | 100          | 70  |     |
| S22    | 19.1 | 1        | Feohy +                                     | 13.05 | 4.18  | 5.15  | 75.45 |       | 1.23  |       |      | 0.94 |       |      |      |      |       |     |     |      |     |       |      |       |      |      |       |       |       |       |       |       |       |      |       |     |      |      |       | 100          | 86  |     |
| S22    | 19.1 | 2        | Chl + Ms +                                  | 47.01 |       | 16.18 | 8.85  |       | 26.12 |       | 1.84 |      |       |      |      |      |       |     |     |      |     |       |      |       |      |      |       |       |       |       |       |       |       |      |       |     |      |      |       | 100          | 96  |     |
| S22    | 19.1 | 3        | Feohy +                                     | 13.45 | 1.97  | 5.41  | 73.53 |       | 0.78  | 1.24  | 1.25 | 0.90 | 1.47  |      |      |      |       |     |     |      |     |       |      |       |      |      |       |       |       |       |       |       |       |      |       |     |      |      |       | 100          | 90  |     |
| S22    | 19.1 | 4        | Feohy +                                     | 2.66  | 9.52  | 4.62  | 78.60 | 2.60  | 1.06  |       |      |      |       |      |      | 0.94 |       |     |     |      |     |       |      |       |      |      |       |       |       |       |       |       |       |      |       |     |      |      |       | 100          | 89  |     |
| S22    | 19.1 | 5        | Feohy +                                     | 6.95  |       |       | 92.58 |       |       | 0.47  |      |      |       |      |      |      |       |     |     |      |     |       |      |       |      |      |       |       |       |       |       |       |       |      |       |     |      |      |       | 100          | 75  |     |
| S22    | 20   | 1        | Qz                                          | 99.61 |       |       | 0.39  |       |       |       |      |      |       |      |      |      |       |     |     |      |     |       |      |       |      |      |       |       |       |       |       |       |       |      |       |     |      |      | 100   | 106          |     |     |
| S22    | 20   | 2        | Feohy +                                     | 5.79  |       |       | 93.65 |       |       | 0.56  |      |      |       |      |      |      |       |     |     |      |     |       |      |       |      |      |       |       |       |       |       |       |       |      |       |     |      |      |       | 100          | 75  |     |
| S22    | 20   | 3        | Spl                                         |       |       | 30.69 | 17.76 |       | 14.19 |       |      |      |       |      |      |      | 37.37 |     |     |      |     |       |      |       |      |      |       |       |       |       |       |       |       |      |       |     |      |      |       | 100          | 102 |     |
| S22    | 20   | 4        | Zrn                                         | 31.35 |       |       |       |       |       |       |      |      |       |      |      |      |       |     |     |      |     |       |      | 68.65 |      |      |       |       |       |       |       |       |       |      |       |     |      |      |       | 100          | 114 |     |
| S22    | 20   | 5        | Grt                                         | 40.84 | 0.36  | 20.80 | 23.63 | 1.85  | 2.83  | 9.69  |      |      |       |      |      |      |       |     |     |      |     |       |      |       |      |      |       |       |       |       |       |       |       |      |       |     |      |      | 100   | 111          |     |     |
| S22    | 20   | 6        | Ep                                          | 40.52 |       | 23.60 | 10.88 |       |       | 22.00 |      |      |       |      |      |      |       |     |     |      |     |       |      |       |      |      |       |       |       |       |       |       |       |      |       |     |      |      |       | 97           | 106 |     |
| S22    | 20   | 7        | Ep                                          | 40.64 |       | 26.01 | 8.32  |       |       | 22.03 |      |      |       |      |      |      |       |     |     |      |     |       |      |       |      |      |       |       |       |       |       |       |       |      |       |     |      |      |       | 97           | 106 |     |
| S22    | 20   | 8        | Feohy +                                     | 7.88  |       |       | 91.60 |       |       | 0.52  |      |      |       |      |      |      |       |     |     |      |     |       |      |       |      |      |       |       |       |       |       |       |       |      |       |     |      |      |       | 100          | 74  |     |
| S22    | 20   | 9        | Ttn                                         | 33.48 | 36.89 | 1.27  | 0.60  |       |       | 27.77 |      |      |       |      |      |      |       |     |     |      |     |       |      |       |      |      |       |       |       |       |       |       |       |      |       |     |      |      |       | 100          | 105 |     |
| S22    | 20   | 10       | Mnohy +                                     | 11.54 |       | 5.36  | 2.69  | 55.47 | 1.02  | 0.82  | 0.83 | 0.87 |       |      | 5.91 |      |       |     |     |      |     |       |      |       |      |      | 15.48 |       |       |       |       |       |       |      |       |     |      |      |       | 100          | 84  |     |
| S22    | 20   | 11       | Feohy +                                     | 8.13  |       | 1.58  | 89.20 |       | 1.09  |       |      |      |       |      |      |      |       |     |     |      |     |       |      |       |      |      |       |       |       |       |       |       |       |      |       |     |      |      |       | 100          | 70  |     |
| S22    | 20   | 12       | Feohy +                                     | 22.10 |       | 11.94 | 53.82 |       | 8.71  | 0.64  | 2.80 |      |       |      |      |      |       |     |     |      |     |       |      |       |      |      |       |       |       |       |       |       |       |      |       |     |      |      |       | 100          | 83  |     |
| S22    | 20   | 13       | Qz                                          | 98.96 |       |       | 1.04  |       |       |       |      |      |       |      |      |      |       |     |     |      |     |       |      |       |      |      |       |       |       |       |       |       |       |      |       |     |      |      |       | 100          | 107 |     |
| S22    | 20   | 14       | Feohy +                                     | 7.53  |       |       | 89.89 |       |       | 0.61  |      |      |       | 0.98 |      |      |       |     |     | 0.99 |     |       |      |       |      |      |       |       |       |       |       |       |       |      |       |     |      |      |       | 100          | 75  |     |
| S22    | 20   | 15       | Feohy +                                     | 6.71  |       | 1.31  | 89.13 |       |       | 0.77  | 0.91 |      |       |      |      |      | 1.15  |     |     |      |     |       |      |       |      |      |       |       |       |       |       |       |       |      |       |     |      |      |       | 100          | 71  |     |
| S22    | 20   | 16       | Qz +                                        | 84.16 | 1.66  | 1.70  | 11.36 | 0.58  | 0.54  |       |      |      |       |      |      |      |       |     |     |      |     |       |      |       |      |      |       |       |       |       |       |       |       |      |       |     |      |      |       | 100          | 98  |     |
| S22    | 20   | 17       | Ep                                          | 40.56 |       | 27.29 | 6.59  |       |       | 22.57 |      |      |       |      |      |      |       |     |     |      |     |       |      |       |      |      |       |       |       |       |       |       |       |      |       |     |      |      |       | 97           | 98  |     |
| S22    | 20   | 18       | Feohy +                                     | 27.46 | 6.90  | 7.75  | 46.11 |       | 2.45  | 5.71  | 0.82 | 2.81 |       |      |      |      |       |     |     |      |     |       |      |       |      |      |       |       |       |       |       |       |       |      |       |     |      |      |       | 100          | 87  |     |
| S22    | 20   | 19       | Zrn                                         | 31.09 |       |       |       |       |       |       |      |      |       |      |      |      |       |     |     |      |     |       |      | 68.91 |      |      |       |       |       |       |       |       |       |      |       |     |      |      |       | 100          | 105 |     |
| S22    | 20   | 20       | Feohy +                                     | 5.13  |       |       | 94.87 |       |       |       |      |      |       |      |      |      |       |     |     |      |     |       |      |       |      |      |       |       |       |       |       |       |       |      |       |     |      |      |       | 100          | 69  |     |
| S22    | 20   | 21       | Qz +                                        | 51.44 |       | 5.24  | 40.93 |       | 1.54  |       |      | 0.86 |       |      |      |      |       |     |     |      |     |       |      |       |      |      |       |       |       |       |       |       |       |      |       |     |      |      |       | 100          | 91  |     |
| S22    | 20   | 22       | Qz +                                        | 51.63 | 1.15  | 8.53  | 9.22  |       | 16.98 | 11.15 | 1.35 |      |       |      |      |      |       |     |     |      |     |       |      |       |      |      |       |       |       |       |       |       |       |      |       |     |      |      |       | 100          | 100 |     |
| S22    | 20.1 | 1        | Ap +                                        |       |       |       | 0.44  |       |       | 46.32 | 1.58 |      | 38.99 | 3.39 | 9.29 |      |       |     |     |      |     |       |      |       |      |      |       |       |       |       |       |       |       |      |       |     |      |      |       | 100          | 112 |     |
| S22    | 20.1 | 2        | Ap                                          |       |       |       | 1.07  |       |       | 46.88 |      |      | 42.57 |      | 7.70 |      |       |     |     |      |     |       |      |       |      |      |       |       |       |       |       |       |       |      |       |     |      |      |       |              | 100 | 111 |
| S22    | 20.1 | 3        | Qz + Ms                                     | 58.34 |       | 13.92 | 14.55 |       | 4.84  |       | 0.55 | 7.80 |       |      |      |      |       |     |     |      |     |       |      |       |      |      |       |       |       |       |       |       |       |      |       |     |      |      |       | 100          | 91  |     |
| S22    | 20.1 | 4        | Feohy +                                     | 5.31  | 1.41  | 2.07  | 86.28 | 1.45  | 1.31  |       |      |      |       |      |      |      | 2.17  |     |     |      |     |       |      |       |      |      |       |       |       |       |       |       |       |      |       |     |      |      |       | 100          | 85  |     |
| S22    | 20.1 | 5        | Ttn +                                       | 28.14 | 37.82 | 7.31  | 7.50  |       | 6.76  | 12.47 |      |      |       |      |      |      |       |     |     |      |     |       |      |       |      |      |       |       |       |       |       |       |       |      |       |     |      |      |       | 100          | 95  |     |
| S22    | 20.1 | 6        | Chl                                         | 28.60 | 0.48  | 18.79 | 17.00 |       | 19.37 | 0.29  | 0.47 |      |       |      |      |      |       |     |     |      |     |       |      |       |      |      |       |       |       |       |       |       |       |      |       |     |      |      |       | 85           | 91  |     |
|        |      |          | Notes                                       |       |       |       |       |       |       |       |      |      |       |      |      |      |       |     |     |      |     |       |      |       |      |      |       |       |       |       |       |       |       |      |       |     |      |      |       |              |     |     |
|        |      |          | + = indicates more than one mineral present |       |       |       |       |       |       |       |      |      |       |      |      |      |       |     |     |      |     |       |      |       |      |      |       |       |       |       |       |       |       |      |       |     |      |      |       |              |     |     |
|        |      |          | * * = indicates that mineral is altered     |       |       |       |       |       |       |       |      |      |       |      |      |      |       |     |     |      |     |       |      |       |      |      |       |       |       |       |       |       |       |      |       |     |      |      |       |              |     |     |
|        |      |          |                                             |       |       |       |       |       |       |       |      |      |       |      |      |      |       |     |     |      |     |       |      |       |      |      |       |       |       |       |       |       |       |      |       |     |      |      |       |              |     |     |



B12: SEM-BSE images and EDS mineral analyses for sample S24.

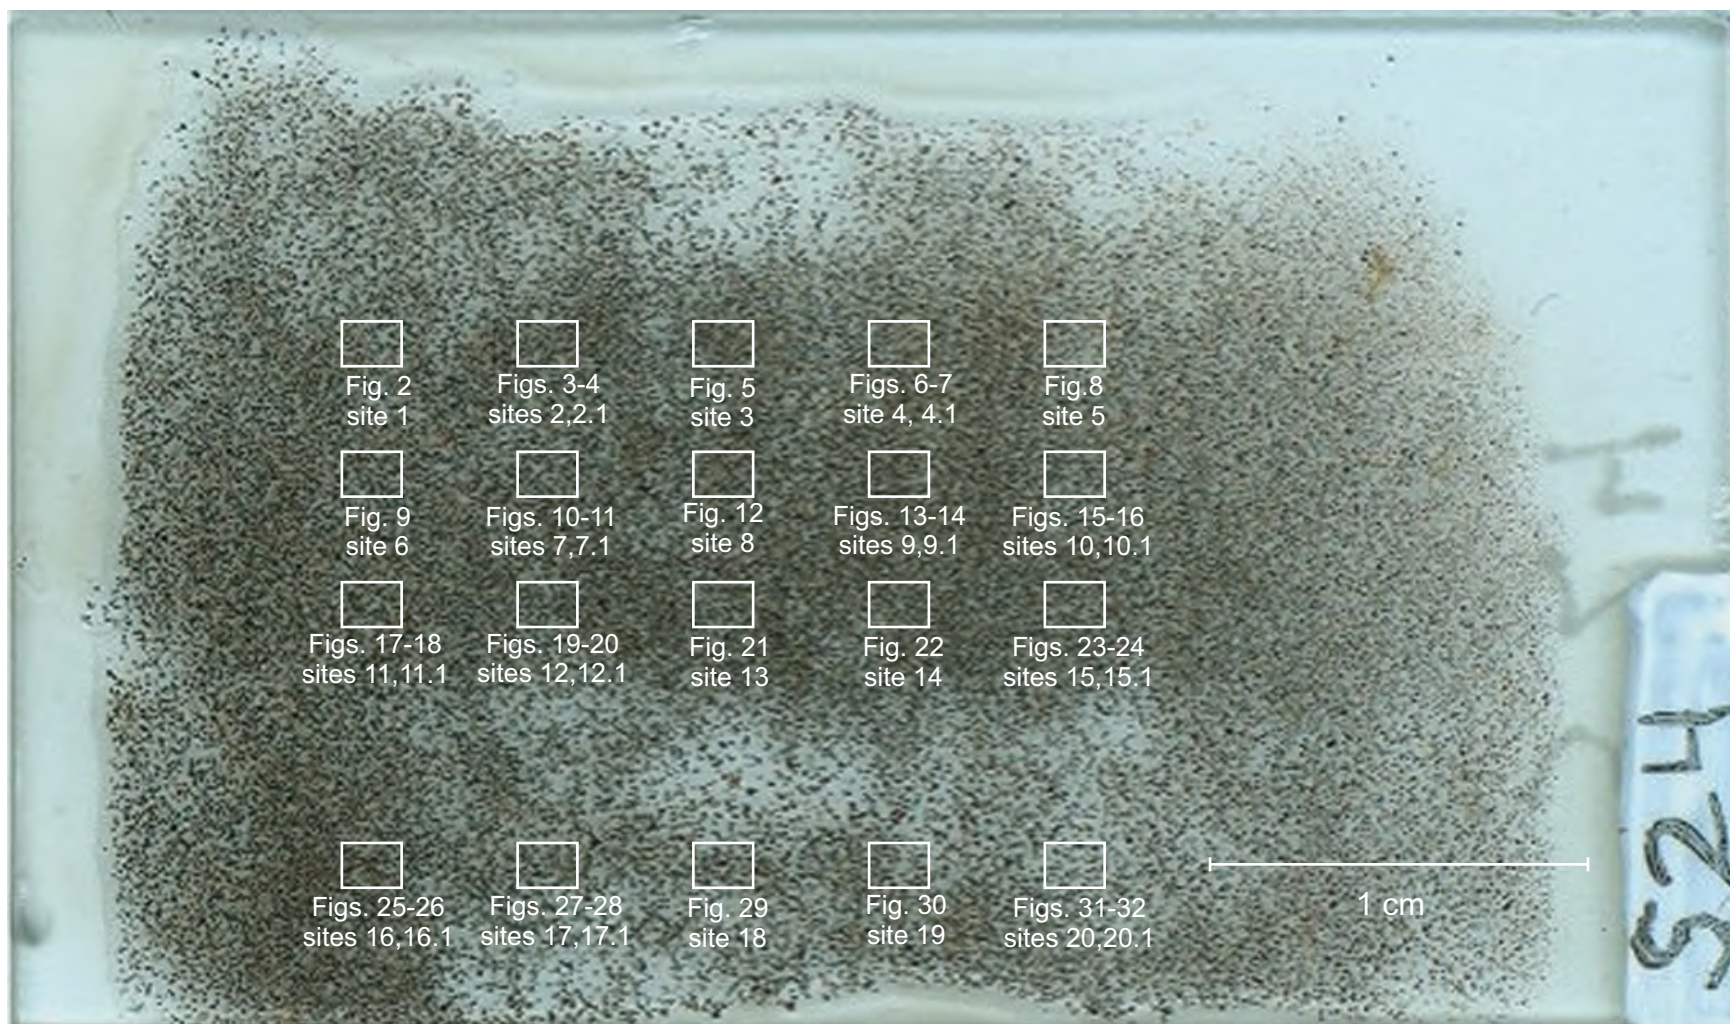

Figure B12.1: Sample S24



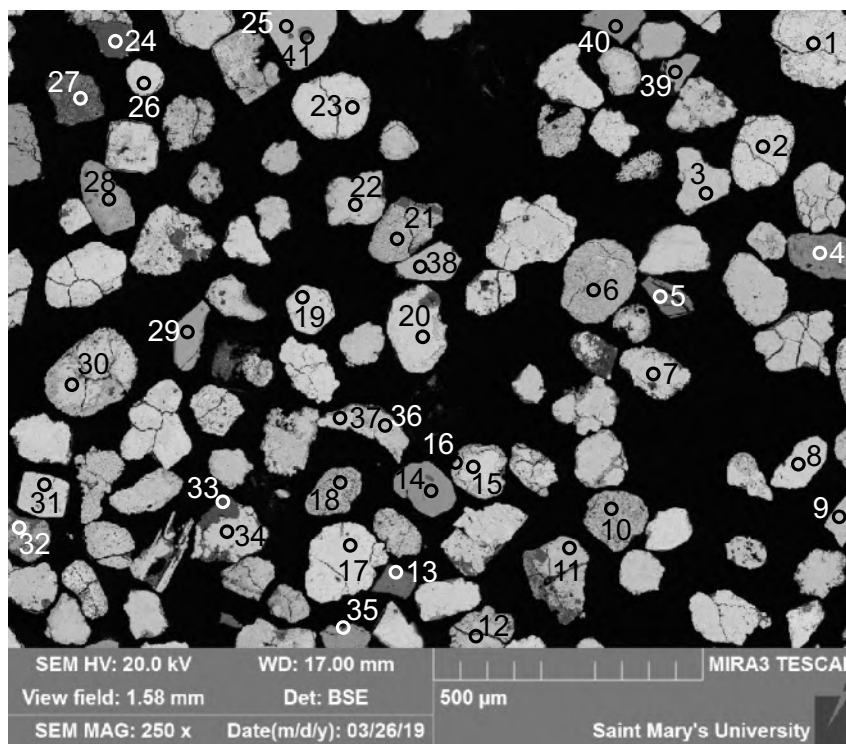

- 1: Fe-oxide/hydroxide + 35: Spinel
- 2: Fe-oxide/hydroxide + 36: Fe-oxide/hydroxide +
- 3: Fe-oxide/hydroxide + 37: Fe-oxide/hydroxide +
- 4: Mn-oxide/hydroxide + 38: Chromite
- 5: Amphibole 39:  $\text{TiO}_2$
- 6: Fe-oxide/hydroxide + 40: Garnet
- 7: Fe-oxide/hydroxide + 41: Quartz +
- 8: Fe-oxide/hydroxide +
- 9: Fe-oxide/hydroxide +
- 10: Fe-oxide/hydroxide +
- 11: Fe-oxide/hydroxide +
- 12: Fe-oxide/hydroxide +
- 13: Apatite
- 14: Garnet
- 15: Fe-oxide/hydroxide +
- 16: Fe-oxide/hydroxide +
- 17: Fe-oxide/hydroxide +
- 18: Fe-oxide/hydroxide
- 19: Fe-oxide/hydroxide +
- 20: Fe-oxide/hydroxide +
- 21: Fe-oxide/hydroxide +
- 22: Fe-oxide/hydroxide +
- 23: Fe-oxide/hydroxide +
- 24: Quartz
- 25: Chromite
- 26: Fe-oxide/hydroxide +
- 27: Quartz +
- 28: Mix
- 29:  $\text{TiO}_2$
- 30: Fe-oxide/hydroxide +
- 31: Fe-oxide/hydroxide +
- 32:  $\text{TiO}_2$  + Quartz
- 33: Quartz
- 34: Fe-oxide/hydroxide +

Figure B12.2: Sample S24 site 1 (SEM). Pedogenic spherules (e.g. 15) and fragments (e.g. 18). Detrital mineral grains: Ap, Grt, Chr, Spl,  $\text{TiO}_2$ , Qz

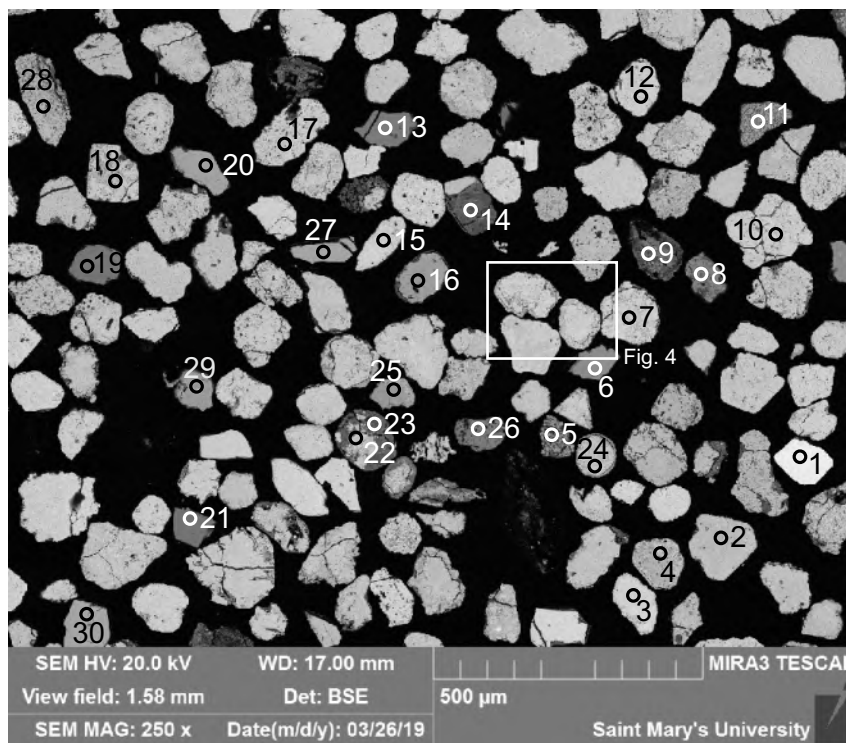

- 1: Zircon
- 2: Fe-oxide/hydroxide +
- 3: Fe-oxide/hydroxide +
- 4: Fe-oxide/hydroxide +
- 5:  $\text{TiO}_2$  +
- 6: Spinel
- 7: Fe-oxide/hydroxide +
- 8: Garnet + Muscovite?
- 9: Muscovite + Chlorite
- 10: Fe-oxide/hydroxide +
- 11:  $\text{TiO}_2$  + Quartz
- 12: Fe-oxide/hydroxide +
- 13: Garnet
- 14: Mix
- 15: Fe-oxide/hydroxide +
- 16: Spinel
- 17: Fe-oxide/hydroxide +
- 18: Fe-oxide/hydroxide +
- 19: Epidote
- 20: Chromite
- 21: Amphibole
- 22: Fe-oxide/hydroxide +
- 23: Mix
- 24: Fe-oxide/hydroxide +
- 25: Spinel
- 26: Apatite
- 27: Chromite
- 28: Fe-oxide/hydroxide +
- 29:  $\text{TiO}_2$
- 30: Chromite

Figure B12.3: Sample S24 site 2 (SEM). Similar to Fig. 2. Detrital mineral grains: Grt, Chr,  $\text{TiO}_2$ , Spl, Zrn, Ep, Ap

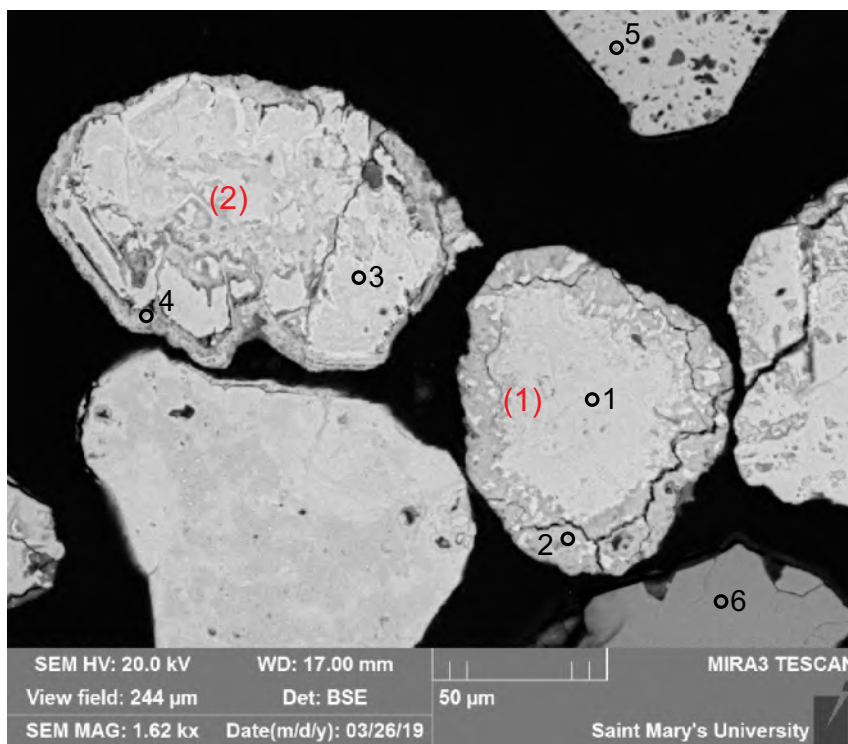

- 1:Fe-oxide/hydroxide +
- 2:Fe-oxide/hydroxide +
- 3:Fe-oxide/hydroxide +
- 4:Fe-oxide/hydroxide +
- 5:Fe-oxide/hydroxide +
- 6:Spinel

Figure B12.4: Sample S24 site 2.1 (SEM). 1-2: Pedogenic hematite pisoliths.

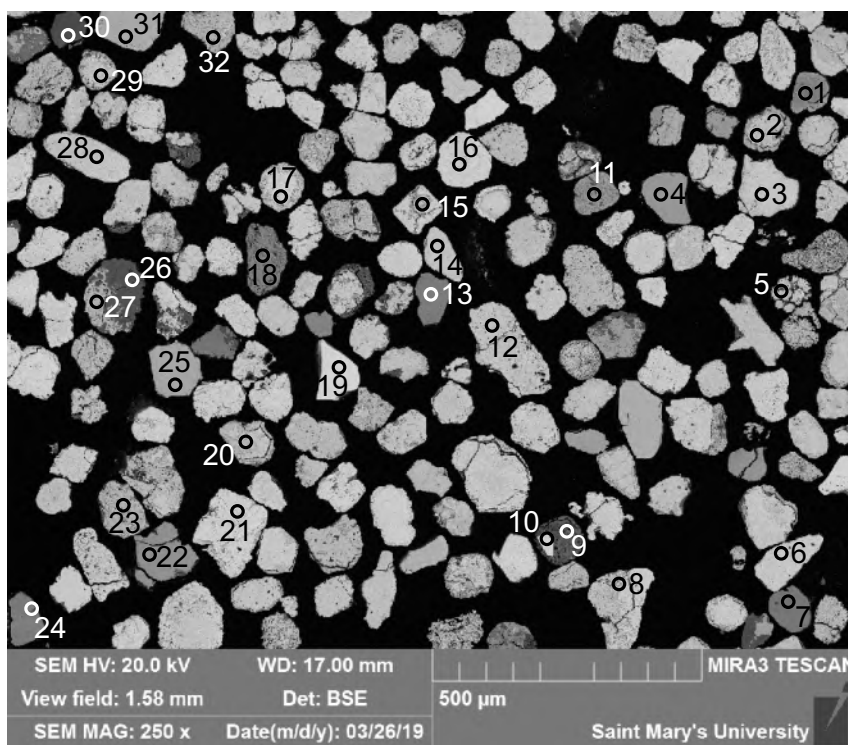

- 1:Mix
- 2:Fe-oxide/hydroxide +
- 3:Ilmenite
- 4:Chromite
- 5:Fe-oxide/hydroxide +
- 6:Fe-oxide/hydroxide +
- 7:Garnet
- 8:Fe-oxide/hydroxide +
- 9:Feldspar + Chlorite
- 10:Fe-oxide/hydroxide +
- 11:Mix
- 12:Fe-oxide/hydroxide +
- 13:Epidote
- 14:Ilmenite
- 15:Fe-oxide/hydroxide +
- 16:Fe-oxide/hydroxide +
- 17:Fe-oxide/hydroxide +
- 18:Mix
- 19:Fe-oxide/hydroxide +
- 20:Fe-oxide/hydroxide +
- 21:Fe-oxide/hydroxide +
- 22:Spinel
- 23:Fe-oxide/hydroxide +
- 24:Garnet +
- 25:Chromite
- 26:Quartz
- 27:Fe-oxide/hydroxide +
- 28:Fe-oxide/hydroxide +
- 29:Fe-oxide/hydroxide +
- 30:Quartz
- 31:Chromite
- 32:Fe-oxide/hydroxide +

Figure B12.5: Sample S24 site 3 (SEM). Similar to Fig. 2. Detrital mineral grains: Ilm, Chr, Grt, Ep, Spl.



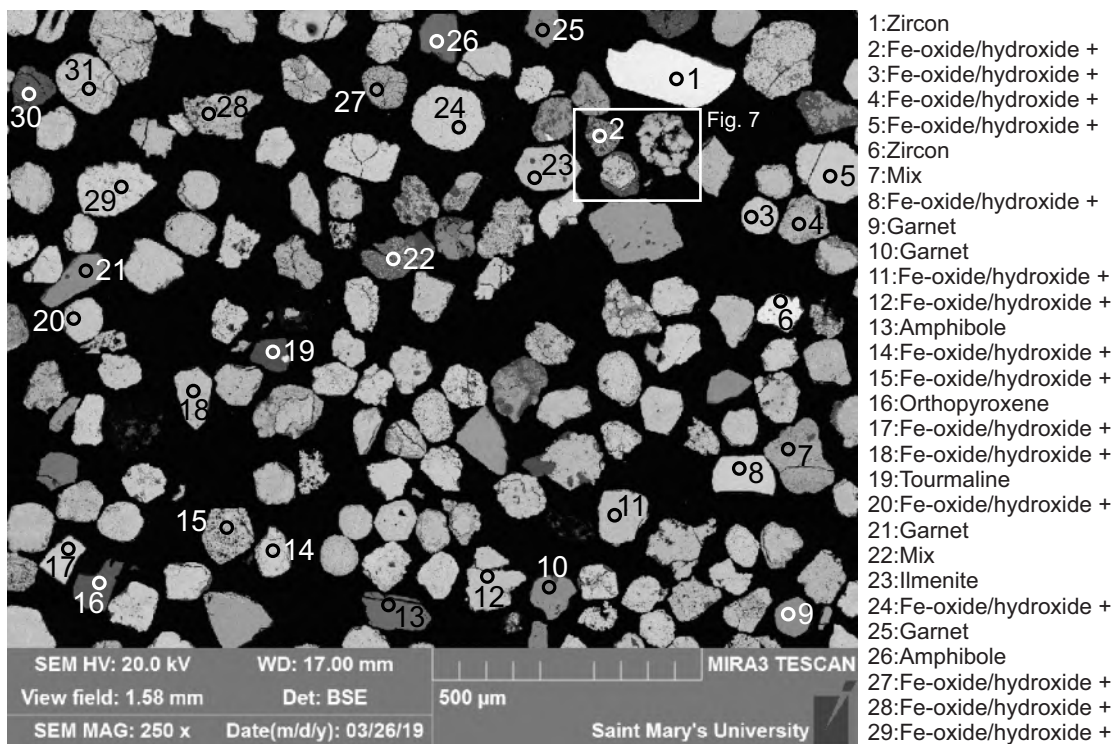

Figure B12.6: Sample S24 site 4 (SEM). Similar to Fig. 2. Detrital mineral grains: Zrn, Grt, Tur, Ilm, Amph, Act, Pl (An), Fe-oxide.

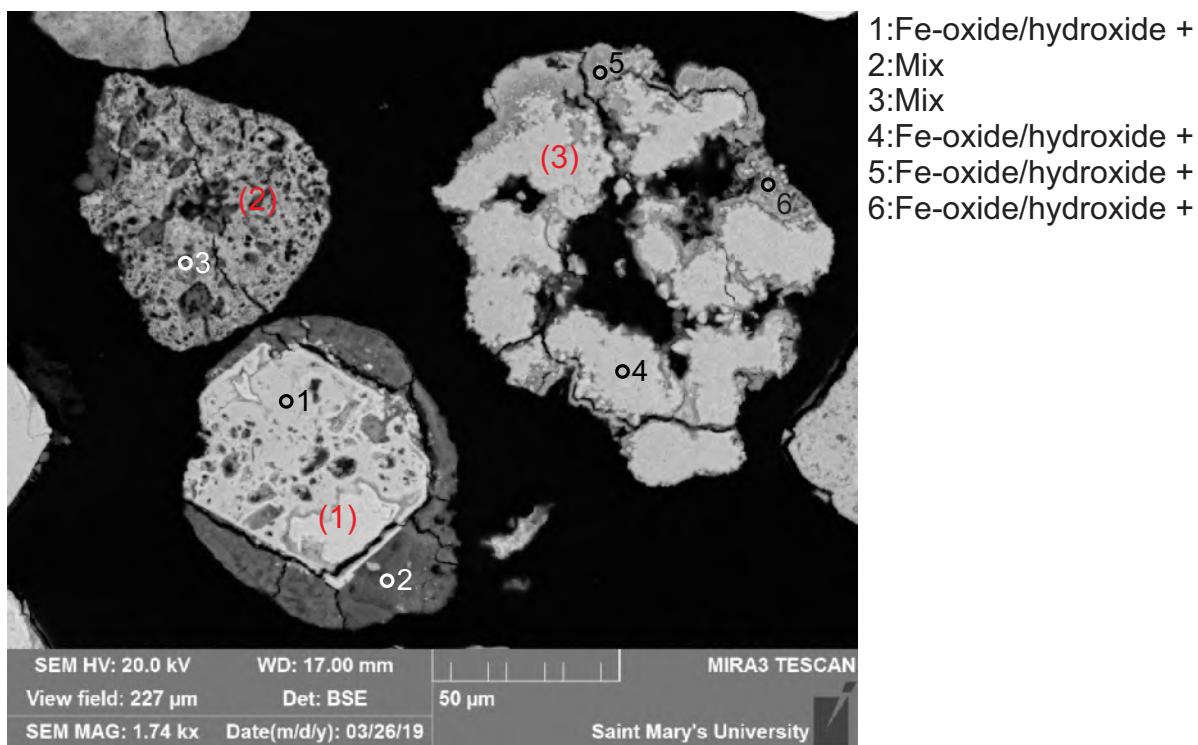

Figure B12.7: Sample S24 site 4.1 (SEM). 1: Altered Fe-oxide detrital grain rimmed by a pedogenic mixture of mineral particles. 2-3: Two other pedogenic mineral fragments.



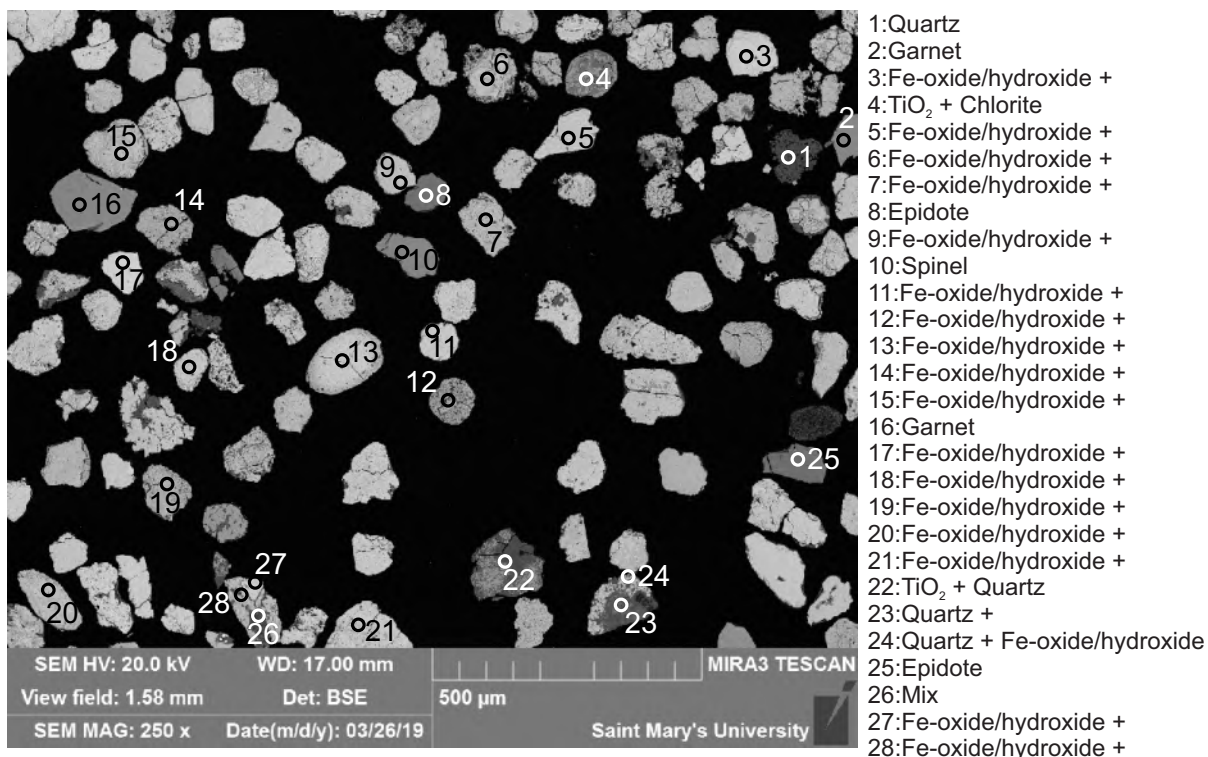

Figure B12.8: Sample S24 site 5 (SEM). Pedogenic spherules (e.g. 13, 20), and fragments. Detrital grains of FeO, Grt, Ep, Spl, TiO<sub>2</sub>.

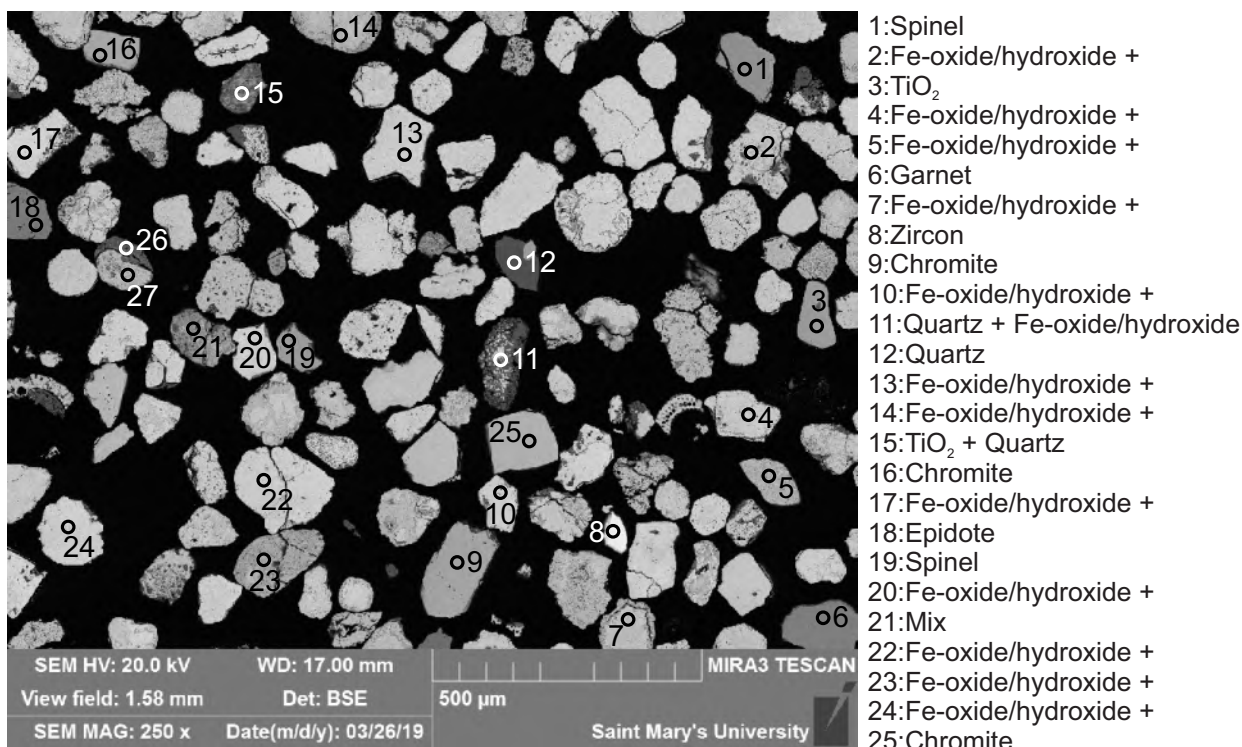

Figure B12.9: Sample S24 site 6 (SEM). Pedogenic spherules and fragments. Detrital mineral grains: Spl, TiO<sub>2</sub>, Grt, Zrn, Chr, Qz, Ep, Spl.

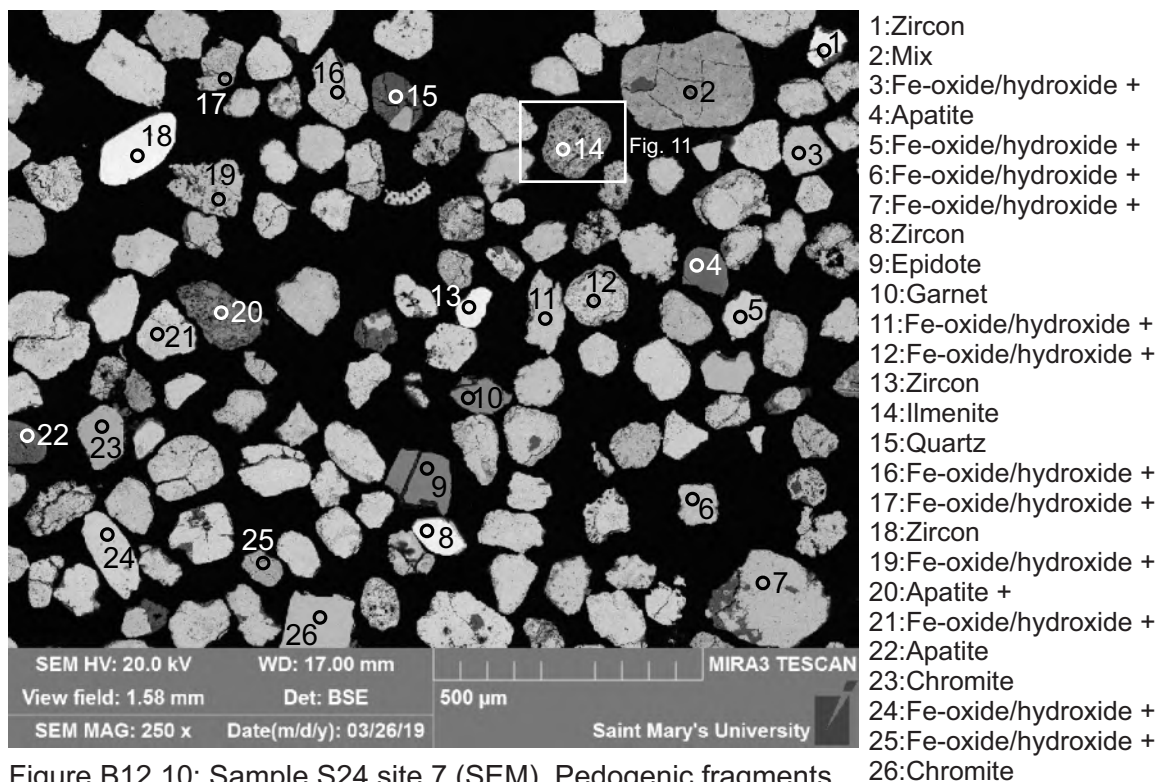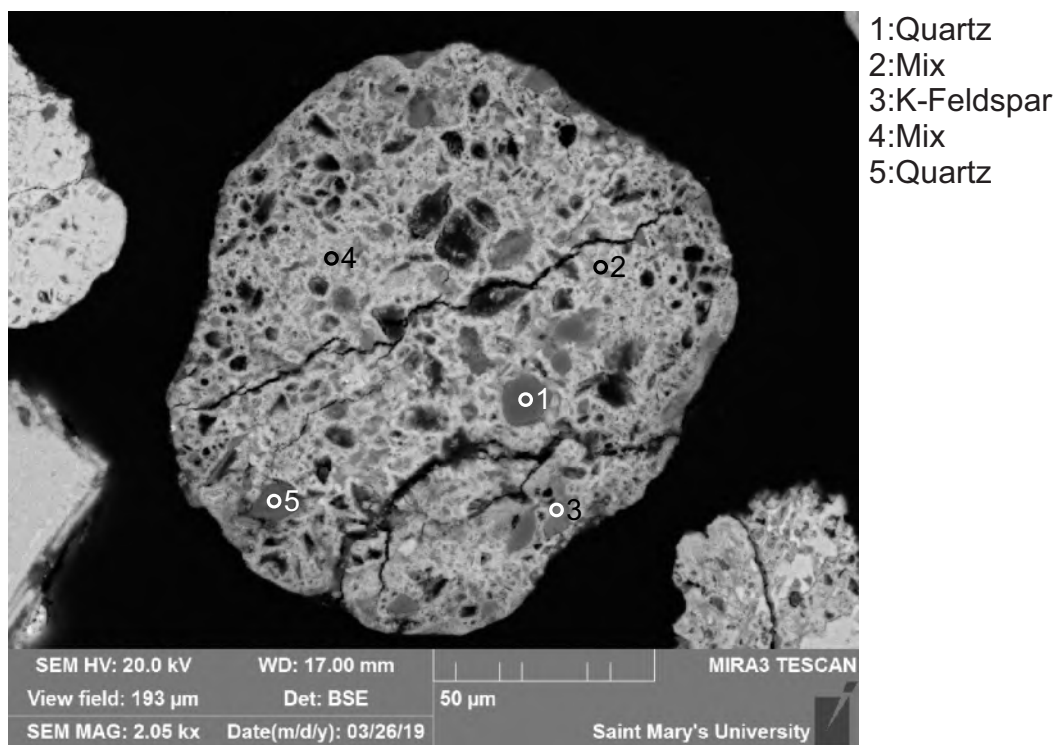



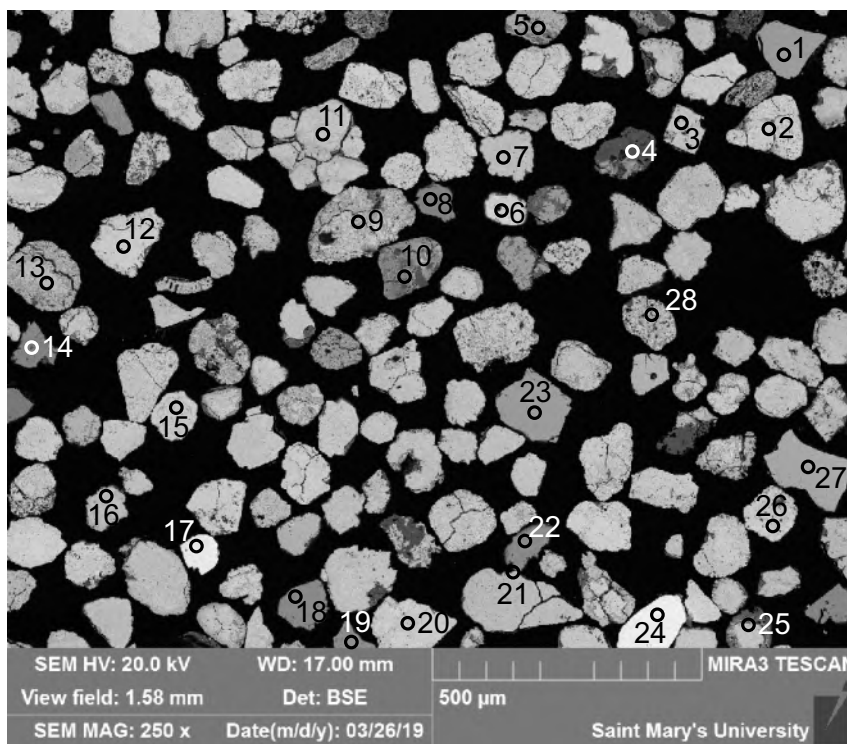

- 1:Chromite
- 2:Fe-oxide/hydroxide +
- 3:Fe-oxide/hydroxide +
- 4:Quartz
- 5:Fe-oxide/hydroxide +
- 6:Fe-oxide/hydroxide +
- 7:Fe-oxide/hydroxide +
- 8:Epidote
- 9:Fe-oxide/hydroxide +
- 10:Mix
- 11:Fe-oxide/hydroxide +
- 12:Fe-oxide/hydroxide +
- 13:Fe-oxide/hydroxide +
- 14:Garnet
- 15:Fe-oxide/hydroxide +
- 16:Fe-oxide/hydroxide +
- 17:Zircon
- 18:Spinel
- 19:Spinel
- 20:Fe-oxide/hydroxide +
- 21:Fe-oxide/hydroxide +
- 22:Garnet
- 23:Chromite
- 24:Zircon
- 25:Fe-oxide/hydroxide +
- 26:Fe-oxide/hydroxide +
- 27:Chromite
- 28:Fe-oxide/hydroxide +

Figure B12.12: Sample S24 site 8 (SEM). Similar to Fig. 2. Detrital mineral grains: Chr, Qz, Ep, Grt, Spl.

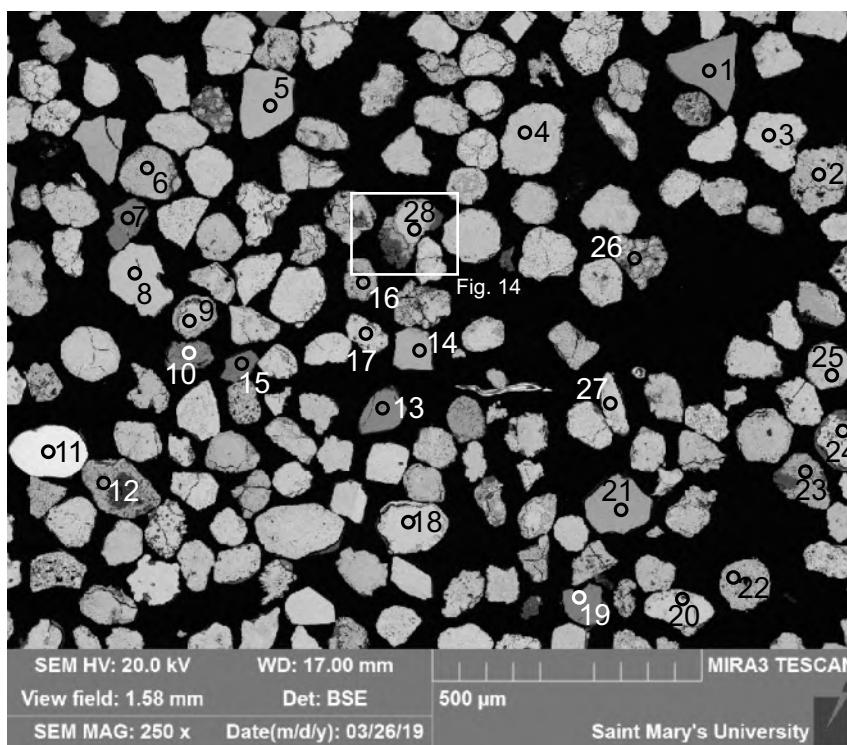

- 1:Chromite
- 2:Fe-oxide/hydroxide +
- 3:Fe-oxide/hydroxide +
- 4:Fe-oxide/hydroxide +
- 5:Chromite
- 6:Fe-oxide/hydroxide +
- 7:Epidote
- 8:Ilmenite
- 9:Fe-oxide/hydroxide +
- 10:Mn-oxide/hydroxide +
- 11:Zircon
- 12:Fe-oxide/hydroxide +
- 13:Garnet
- 14:Chromite
- 15:Epidote
- 16:Fe-oxide/hydroxide +
- 17:Fe-oxide/hydroxide +
- 18:Fe-oxide/hydroxide +
- 19:Epidote
- 20:Fe-oxide/hydroxide +
- 21:Chromite
- 22:Fe-oxide/hydroxide +
- 23:Fe-oxide/hydroxide +
- 24:Fe-oxide/hydroxide +
- 25:Fe-oxide/hydroxide +
- 26:Fe-oxide/hydroxide +
- 27:Fe-oxide/hydroxide +
- 28:Fe-oxide/hydroxide +

Figure B12.13: Sample S24 site 9 (SEM). Similar to Fig. 2. Detrital mineral grains: Chr, Ep, Ilm, Zrn, Grt, Qz, Fe-oxide.

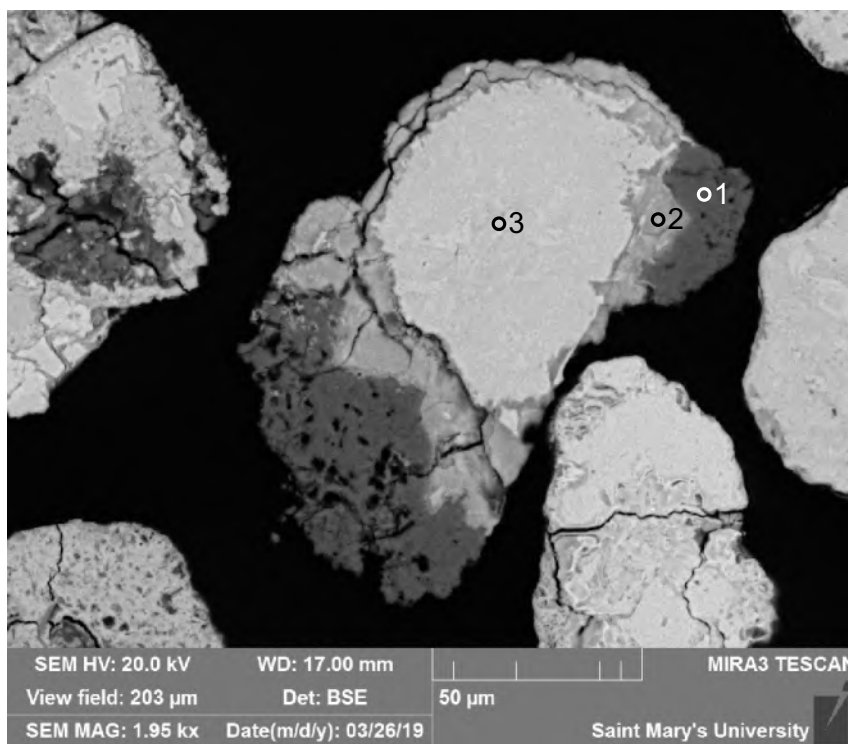

- 1:Quartz
- 2:Fe-oxide/hydroxide +
- 3:Fe-oxide/hydroxide +

Figure B12.14: Sample S24 site 9.1 (SEM). Probably an original detrital Fe-oxide grain enveloped by silcrete.

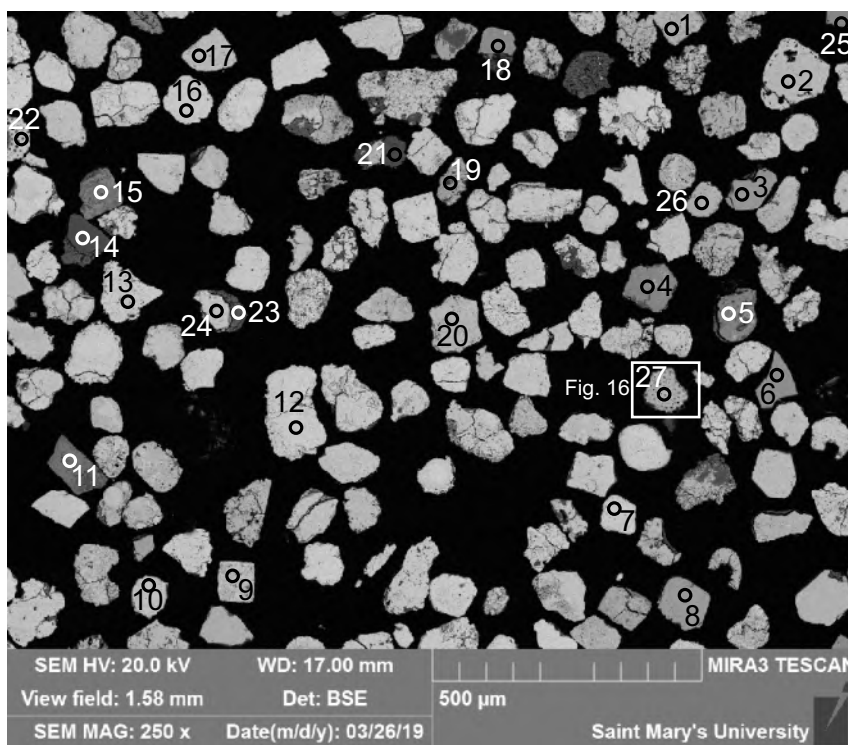

- 1:Fe-oxide/hydroxide +
- 2:Chromite
- 3:Chromite
- 4:Titanite
- 5:Mix
- 6:Spinel
- 7:Fe-oxide/hydroxide +
- 8:Chromite
- 9:Fe-oxide/hydroxide +
- 10:Fe-oxide/hydroxide +
- 11:Apatite
- 12:Fe-oxide/hydroxide +
- 13:Fe-oxide/hydroxide +
- 14:Quartz
- 15:Mix
- 16:Fe-oxide/hydroxide +
- 17:Fe-oxide/hydroxide +
- 18:Garnet
- 19:Mix
- 20:Fe-oxide/hydroxide +
- 21:Quartz
- 22:Fe-oxide/hydroxide +
- 23:Quartz +
- 24:Fe-oxide/hydroxide +
- 25:Garnet
- 26:Fe-oxide/hydroxide +
- 27:Fe-oxide/hydroxide +

Figure B12.15: Sample S24 site 10 (SEM). Similar to Fig. 2. Detrital mineral grains: Chr, Ttn, Spl, Ap, Qz, Grt.



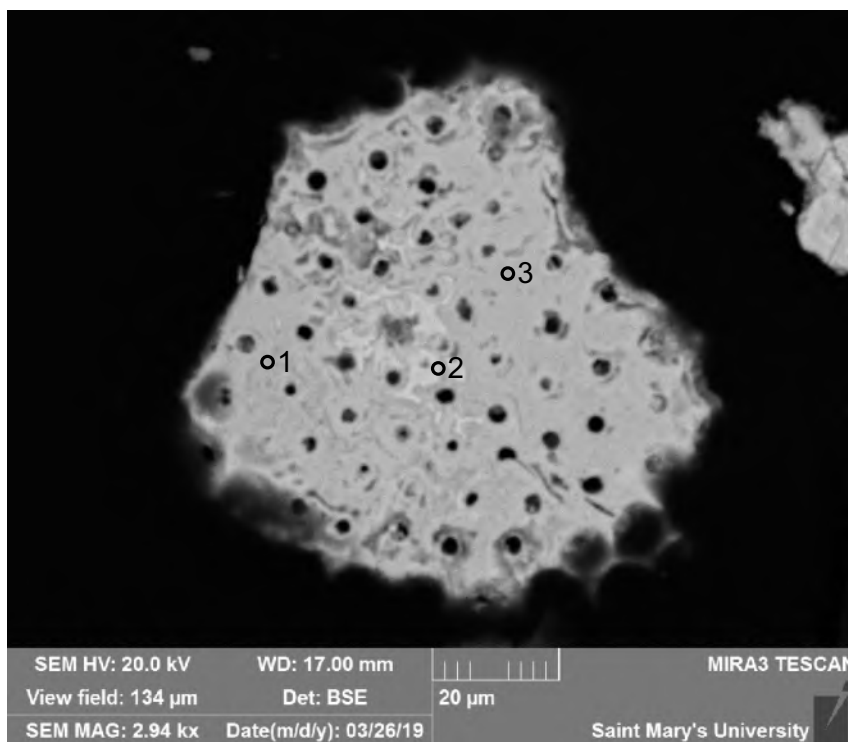

- 1:Fe-oxide/hydroxide +
- 2:Fe-oxide/hydroxide +
- 3:Fe-oxide/hydroxide +

Figure B12.16: Sample S24 site 10.1 (SEM). Pedogenic mineral fragment, or possibly a fossil.

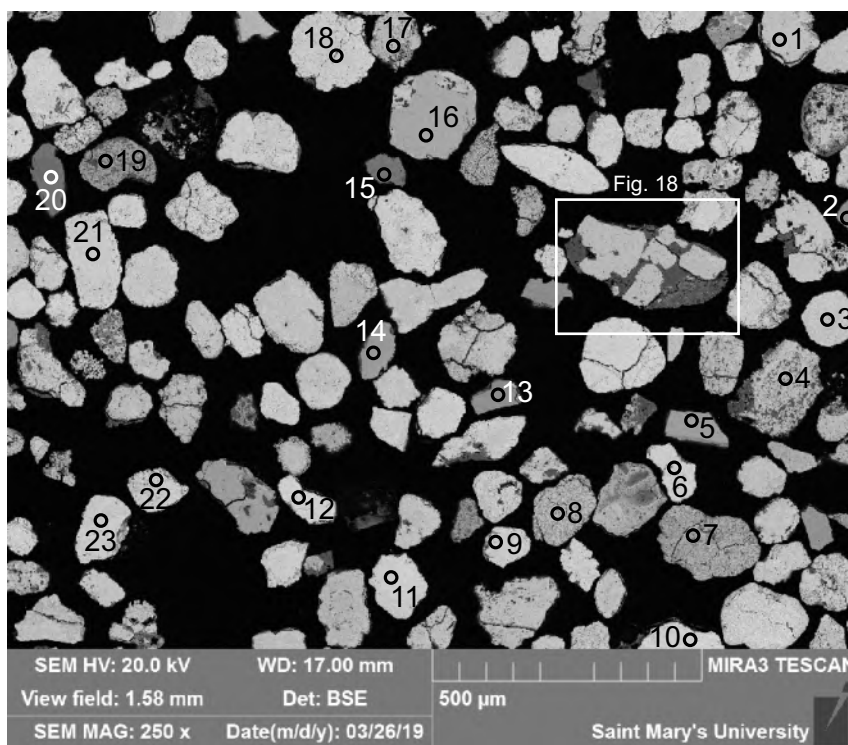

- 1:Fe-oxide/hydroxide +
- 2:Garnet
- 3:Fe-oxide/hydroxide +
- 4:Quartz + Fe-oxide/hydroxide
- 5:Chromite
- 6:Fe-oxide/hydroxide +
- 7:Mix
- 8:Fe-oxide/hydroxide +
- 9:Fe-oxide/hydroxide +
- 10:Fe-oxide/hydroxide +
- 11:Fe-oxide/hydroxide +
- 12:Fe-oxide/hydroxide +
- 13:Spinel
- 14:Spinel
- 15:Epidote
- 16:Chromite
- 17:Fe-oxide/hydroxide +
- 18:Fe-oxide/hydroxide +
- 19:TiO<sub>2</sub> + Quartz
- 20:Amphibole
- 21:Fe-oxide/hydroxide +
- 22:Fe-oxide/hydroxide +
- 23:Fe-oxide/hydroxide +

Figure B12.17: Sample S24 site 11 (SEM). Similar to Fig. 2. Detrital mineral grains: Grt, Chr, Spl, Ep, TiO<sub>2</sub>, Qz, Amph, Chl?, Fe-oxide.



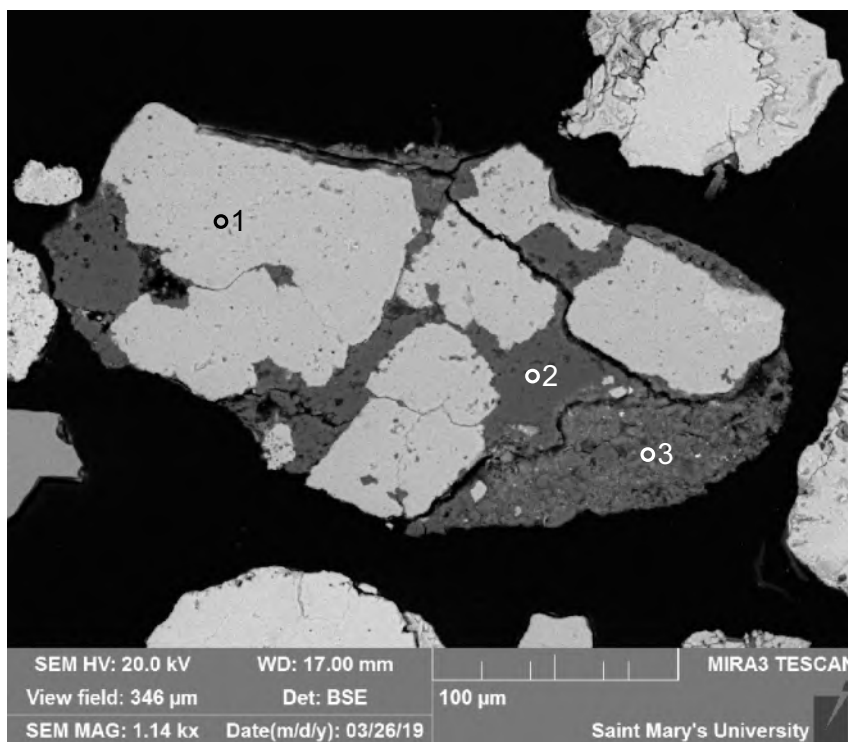

- 1:Fe-oxide/hydroxide +
- 2:Quartz
- 3:Chlorite +

Figure B12.18: Sample S24 site 11.1 (SEM). An original lithic clast made up of Fe-oxide grains (Mag) + quartz + probably chlorite, all pedogenically altered. Originally hydrothermal lithic clast.

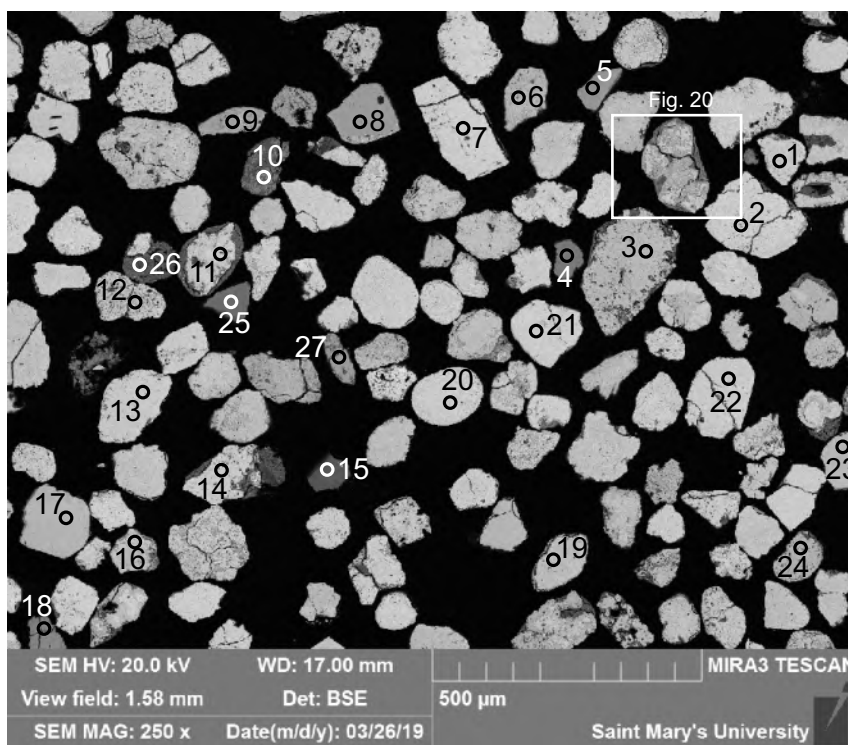

- 1:Fe-oxide/hydroxide +
- 2:Fe-oxide/hydroxide +
- 3:Fe-oxide/hydroxide +
- 4:Epidote
- 5:Spinel
- 6:Fe-oxide/hydroxide +
- 7:Fe-oxide/hydroxide +
- 8:Chromite
- 9:Fe-oxide/hydroxide +
- 10:Epidote +
- 11:Fe-oxide/hydroxide +
- 12:Fe-oxide/hydroxide +
- 13:Fe-oxide/hydroxide +
- 14:Fe-oxide/hydroxide +
- 15:Tourmaline
- 16:Fe-oxide/hydroxide +
- 17:Chromite
- 18:Apatite
- 19:Fe-oxide/hydroxide +
- 20:Fe-oxide/hydroxide +
- 21:Fe-oxide/hydroxide +
- 22:Fe-oxide/hydroxide +
- 23:Chromite
- 24:Fe-oxide/hydroxide +
- 25:Clinopyroxene
- 26:K-feldspar + Chlorite
- 27:TiO<sub>2</sub>

Figure B12.19: Sample S24 site 12 (SEM). Similar to Fig. 2. Detrital mineral grains: Ep, Spl, Chr, Tur, Ap, Cpx, Fe-oxide.

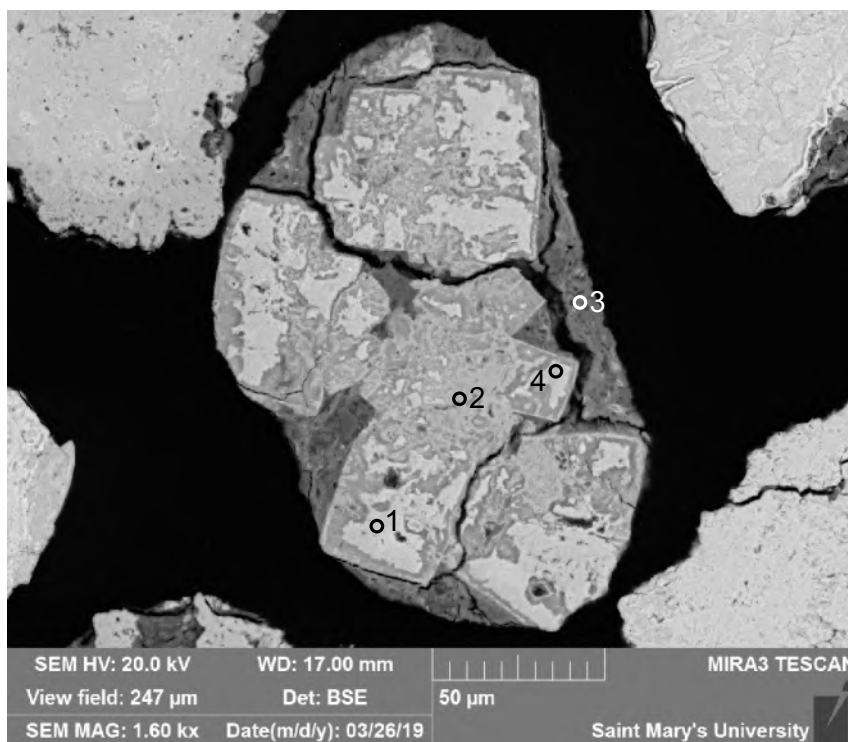

- 1:Fe-oxide/hydroxide +
- 2:Fe-oxide/hydroxide +
- 3:Chlorite + Muscovite
- 4:Fe-oxide/hydroxide +

Figure B12.20: Sample S24 site 12.1 (SEM). An original clast made up of Fe-oxide grains (originally magnetite) + probably chloritized muscovite, all pedogenically altered. Original hydrothermal.

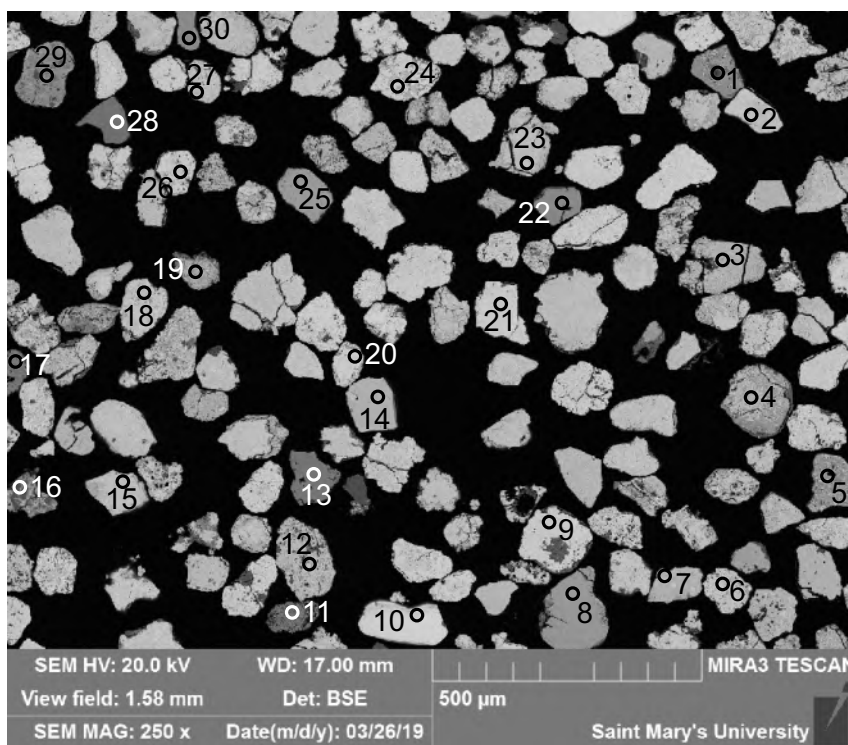

- 1:Chromite +
- 2:Fe-oxide/hydroxide +
- 3:Fe-oxide/hydroxide +
- 4:Fe-oxide/hydroxide +
- 5:Fe-oxide/hydroxide +
- 6:Fe-oxide/hydroxide +
- 7:Fe-oxide/hydroxide +
- 8:Spinel
- 9:Fe-oxide/hydroxide +
- 10:Ti-Magnetite
- 11:Apatite
- 12:Fe-oxide/hydroxide +
- 13:Spinel
- 14:Chromite
- 15:Ilmenite
- 16:Quartz +
- 17:Epidote
- 18:Fe-oxide/hydroxide +
- 19:Fe-oxide/hydroxide +
- 20:Fe-oxide/hydroxide +
- 21:Fe-oxide/hydroxide +
- 22:Garnet
- 23:Fe-oxide/hydroxide +
- 24:Fe-oxide/hydroxide +
- 25:TiO<sub>2</sub>
- 26:Fe-oxide/hydroxide +
- 27:Fe-oxide/hydroxide +
- 28:Epidote
- 29:Mix
- 30:Garnet

Figure B12.21: Sample S24 site 13 (SEM). Similar to Fig. 2. Detrital mineral grains: Chr, Spl, Ap, Ti-Mag, Ilm, Qz, Ep, Grt, TiO<sub>2</sub>.



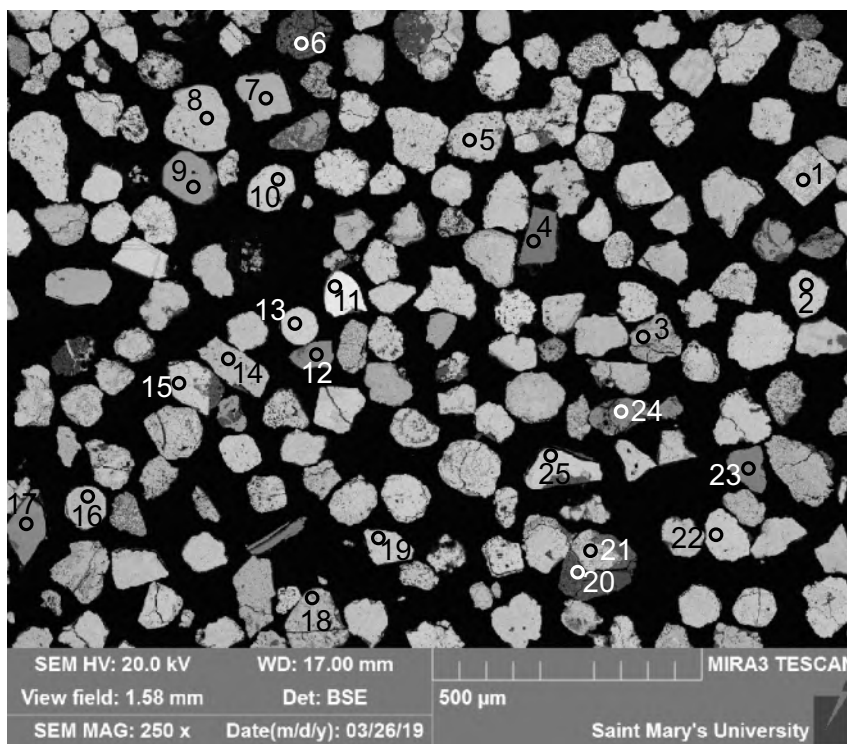

- 1:Fe-oxide/hydroxide +
- 2:Fe-oxide/hydroxide +
- 3:Fe-oxide/hydroxide +
- 4:Garnet
- 5:Fe-oxide/hydroxide +
- 6:Muscovite +
- 7:Chromite
- 8:Fe-oxide/hydroxide +
- 9:TiO<sub>2</sub>
- 10:Fe-oxide/hydroxide +
- 11:Zircon
- 12:Apatite
- 13:Fe-oxide/hydroxide +
- 14:Fe-oxide/hydroxide +
- 15:Fe-oxide/hydroxide +
- 16:Fe-oxide/hydroxide +
- 17:Titanite
- 18:Fe-oxide/hydroxide +
- 19:Fe-oxide/hydroxide +
- 20:Mix
- 21:Fe-oxide/hydroxide +
- 22:Fe-oxide/hydroxide +
- 23:Garnet
- 24:Mix
- 25:Fe-oxide/hydroxide +

Figure B12.22: Sample S24 site 14 (SEM). Similar to Fig. 2.  
Detrital mineral grains: Grt, Ms, Chr, TiO<sub>2</sub>, Zrn, Ap, Ttn.

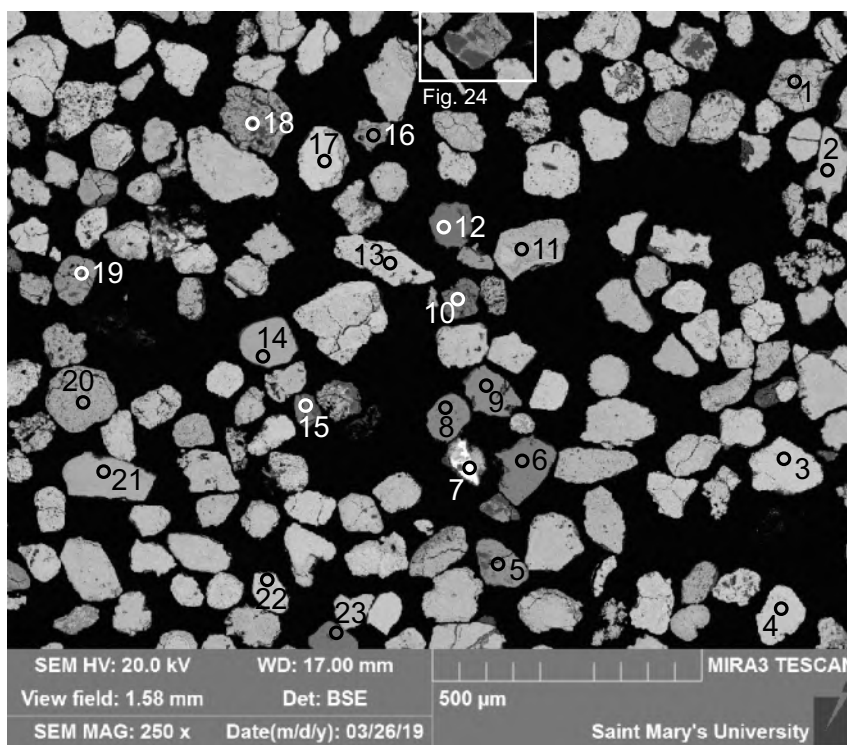

- 1:Fe-oxide/hydroxide +
- 2:Fe-oxide/hydroxide +
- 3:Fe-oxide/hydroxide
- 4:Fe-oxide/hydroxide +
- 5:Fe-oxide/hydroxide +
- 6:Spinel
- 7:Fe-oxide/hydroxide
- 8:Garnet
- 9:Garnet
- 10:Epidote
- 11:Fe-oxide/hydroxide +
- 12:Epidote
- 13:Fe-oxide/hydroxide +
- 14:Chromite
- 15:Epidote
- 16:Quartz + Fe-oxide/hydroxide
- 17:Fe-oxide/hydroxide +
- 18:Mix
- 19:Mix
- 20:Fe-oxide/hydroxide +
- 21:Chromite
- 22:Fe-oxide/hydroxide +
- 23:Epidote

Figure B12.23: Sample S24 site 15 (SEM). Similar to Fig. 2.  
Detrital mineral grains: Fe-oxide, Spl, Grt, Ep, Chr, Qz.

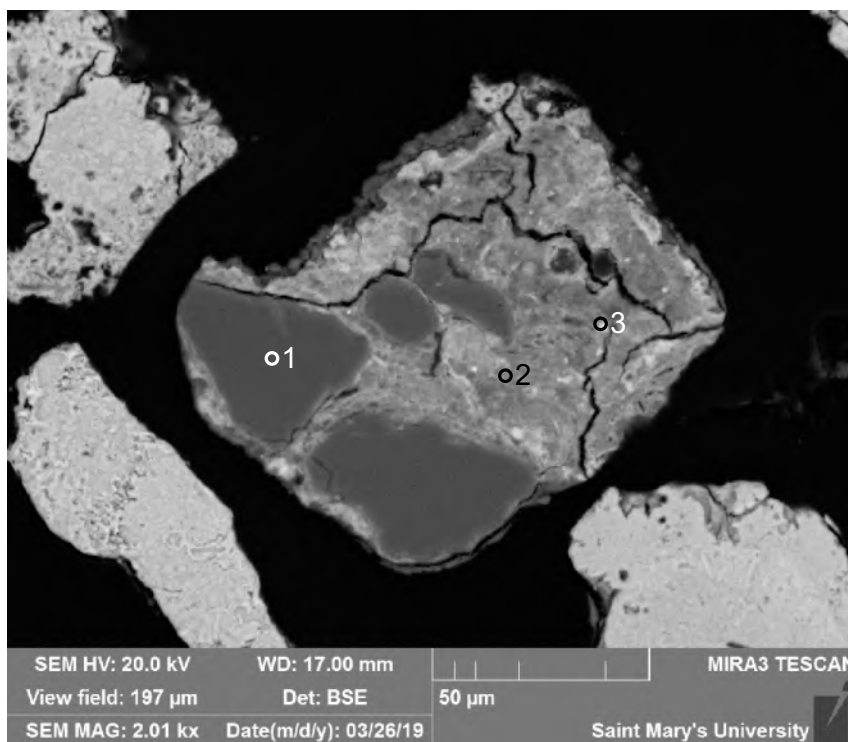

- 1:Quartz
- 2:Chlorite +
- 3:Mix

Figure B12.24: Sample S24 site 15.1 (SEM). Original lithic clast made up of quartz + probably chlorite, siltstone, now pedogenically altered.

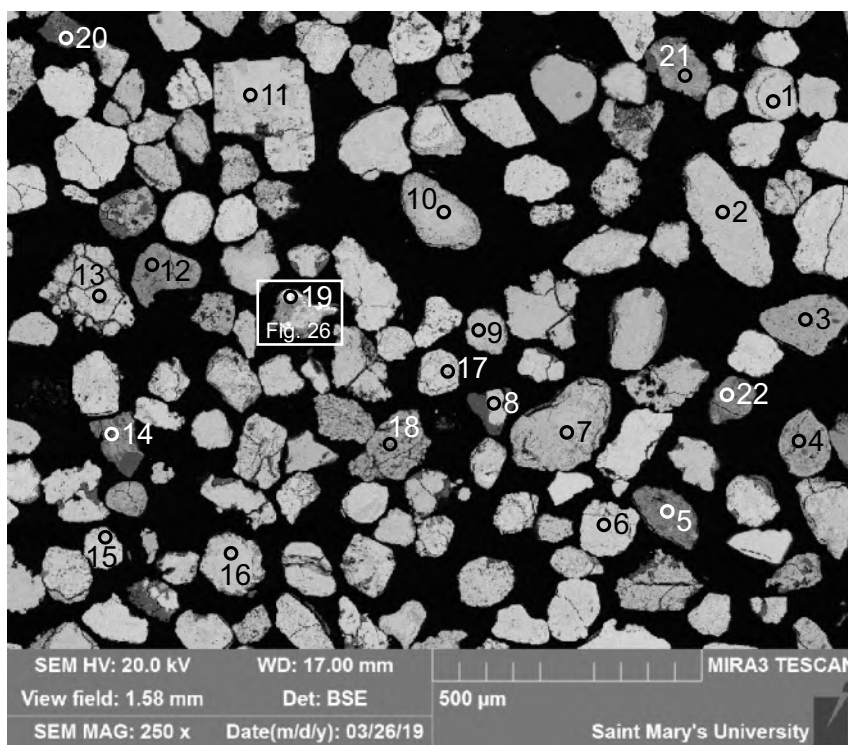

- 1:Fe-oxide/hydroxide +
- 2:Fe-oxide/hydroxide +
- 3:Mix
- 4:Mix
- 5:Mix
- 6:Fe-oxide/hydroxide +
- 7:Fe-oxide/hydroxide +
- 8:Fe-oxide/hydroxide +
- 9:Fe-oxide/hydroxide +
- 10:Fe-oxide/hydroxide +
- 11:Fe-oxide/hydroxide +
- 12:Mix
- 13:Fe-oxide/hydroxide + Chlorite +
- 14:Titanite +
- 15:Fe-oxide/hydroxide +
- 16:Fe-oxide/hydroxide +
- 17:Fe-oxide/hydroxide +
- 18:Fe-oxide/hydroxide + Chlorite +
- 19:Fe-oxide/hydroxide
- 20:Quartz +
- 21:Titanite +
- 22:Fe-oxide/hydroxide + Chlorite

Figure B12.25: Sample S24 site 16 (SEM). Similar to Fig. 2. Detrital mineral grains: Ttn, Chl, Qz, Fe-oxide.



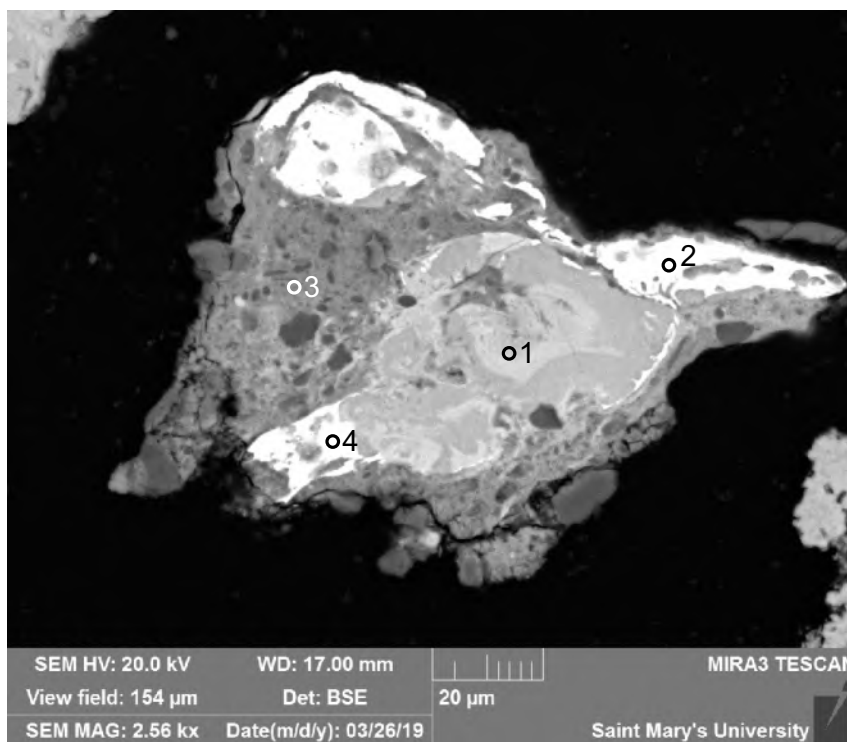

- 1:Fe-oxide/hydroxide
- 2:Magnetite
- 3:Mix
- 4:Magnetite

Figure B12.26: Sample S24 site 16.1 (SEM). Original lithic clast made up of Fe-oxide + other grains all pedogenically affected. Common zinc.

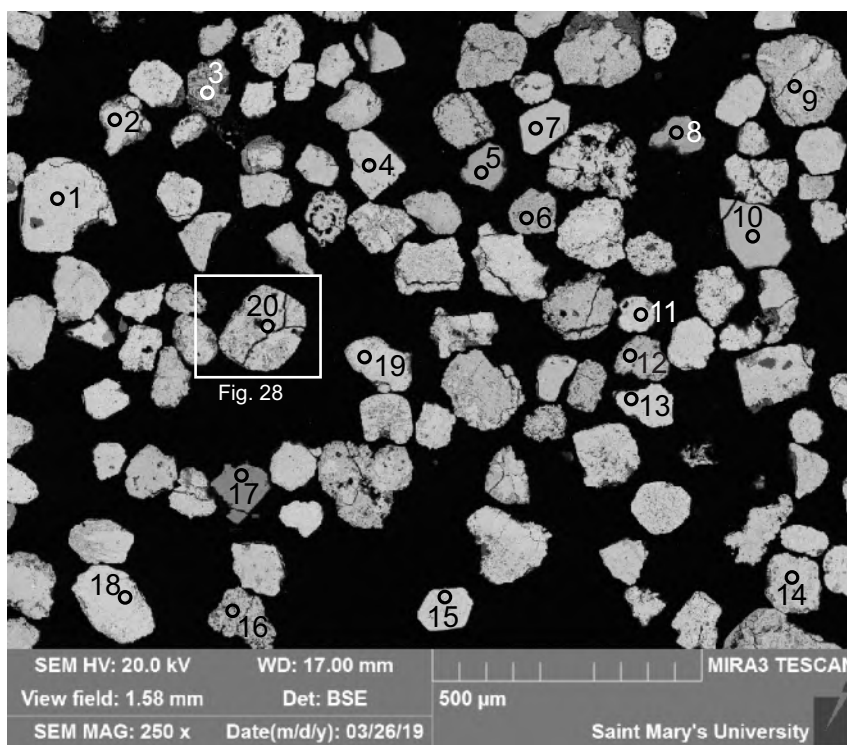

- 1:Fe-oxide/hydroxide +
- 2:Fe-oxide/hydroxide +
- 3:Mix
- 4:Ilmenite + Quartz
- 5:Chromite
- 6:"Ilmenite"
- 7:Chromite
- 8:TiO<sub>2</sub> +
- 9:Fe-oxide/hydroxide +
- 10:Chromite
- 11:Fe-oxide/hydroxide +
- 12:Fe-oxide/hydroxide +
- 13:Fe-oxide/hydroxide +
- 14:Fe-oxide/hydroxide +
- 15:Fe-oxide/hydroxide +
- 16:Fe-oxide/hydroxide +
- 17:Spinel
- 18:Fe-oxide/hydroxide +
- 19:Fe-oxide/hydroxide +
- 20:Fe-oxide/hydroxide +

Figure B12.27: Sample S24 site 17 (SEM). Similar to Fig. 2. Detrital mineral grains: Chr, Ilm, TiO<sub>2</sub>, Spl, Fe-oxide.



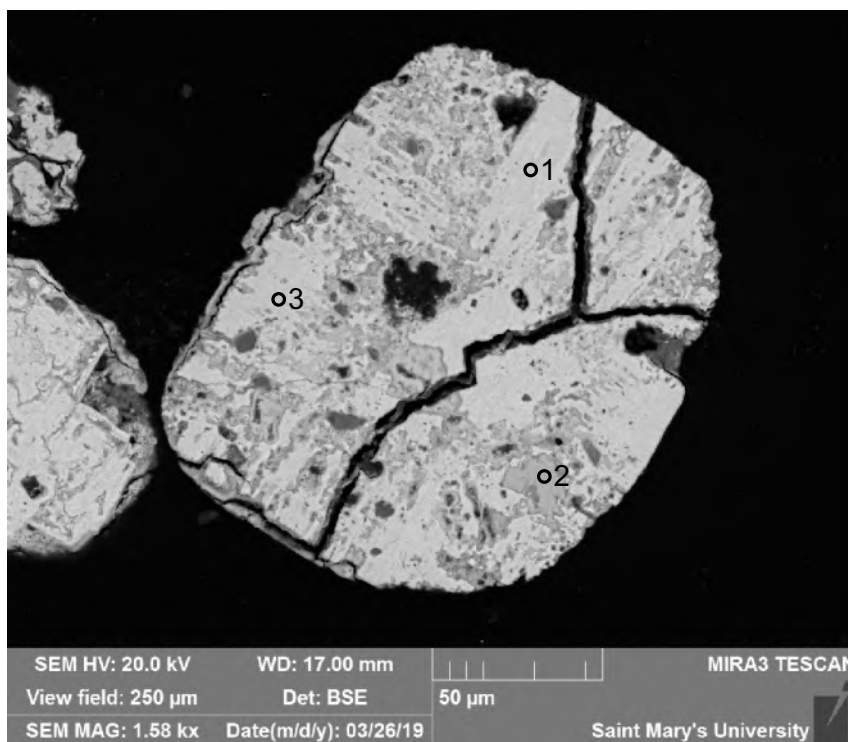

- 1:Fe-oxide/hydroxide +
- 2:Fe-oxide/hydroxide +
- 3:Fe-oxide/hydroxide +

Figure B12.28: Sample S24 site 17.1 (SEM). Original detrital probably Fe-oxide mineral (magnetite) modified by diagenesis. Has zinc.

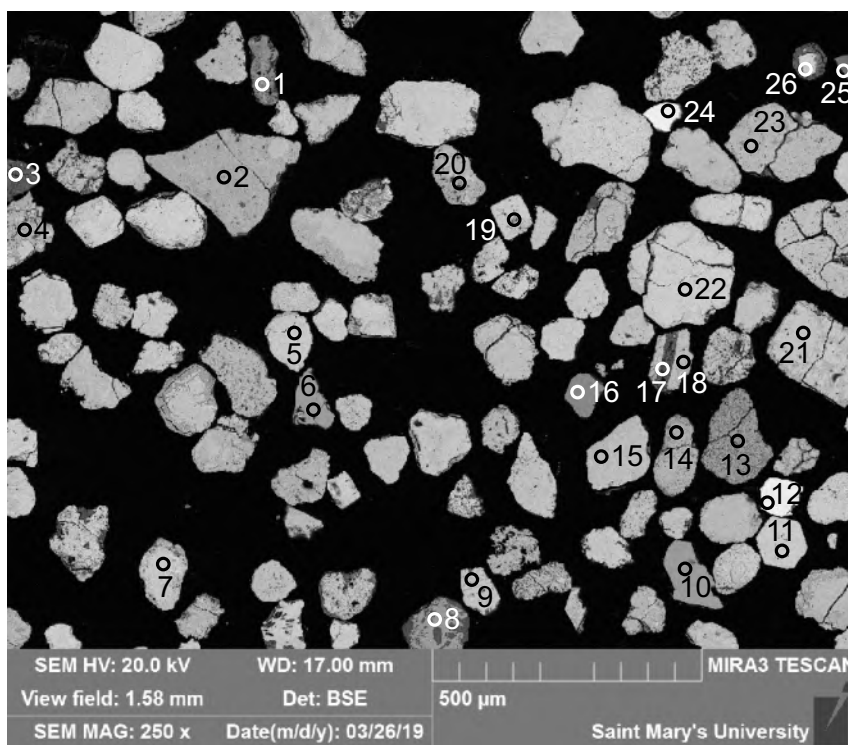

- 1:Mix
- 2:Fe-oxide/hydroxide +
- 3:Mix
- 4:Mix
- 5:Fe-oxide/hydroxide +
- 6:Mix
- 7:Fe-oxide/hydroxide +
- 8:"Ilmenite" +
- 9:Fe-oxide/hydroxide +
- 10:Chromite
- 11:Fe-oxide/hydroxide +
- 12:Zircon
- 13:TiO<sub>2</sub> +
- 14:Mix
- 15:Fe-oxide/hydroxide +
- 16:Garnet
- 17:Muscovite +
- 18:Fe-oxide/hydroxide +
- 19:Fe-oxide/hydroxide +
- 20:Fe-oxide/hydroxide +
- 21:Fe-oxide/hydroxide +
- 22:Fe-oxide/hydroxide +
- 23:Fe-oxide/hydroxide +
- 24:Zircon
- 25:Epidote
- 26:Fe-oxide/hydroxide +

Figure B12.29: Sample S24 site 18 (SEM). Similar to Fig. 2. Detrital minerals: Ilm, Chr, Zrn, ?TiO<sub>2</sub>, Grt, Ep.

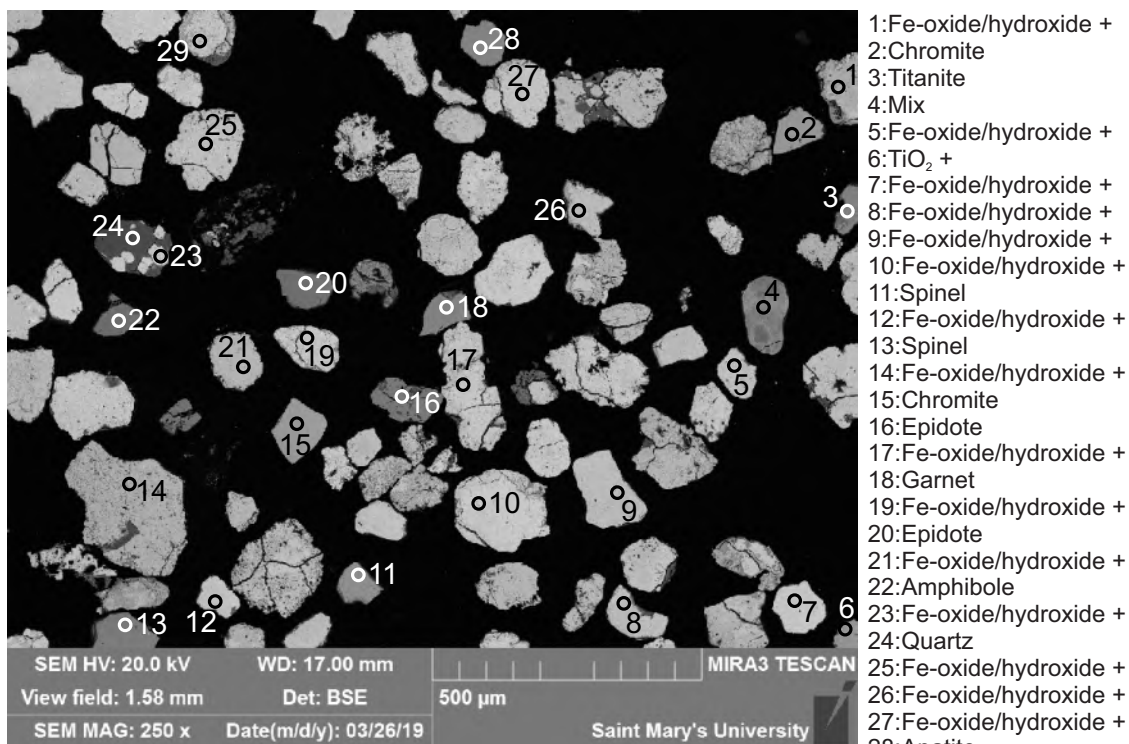

Figure B12.30: Sample S24 site 19 (SEM). Similar to Fig. 2.  
Detrital mineral grains: Chr, Ttn, TiO<sub>2</sub>, Spl, Ep, Grt, Amph, Qz, Ap.

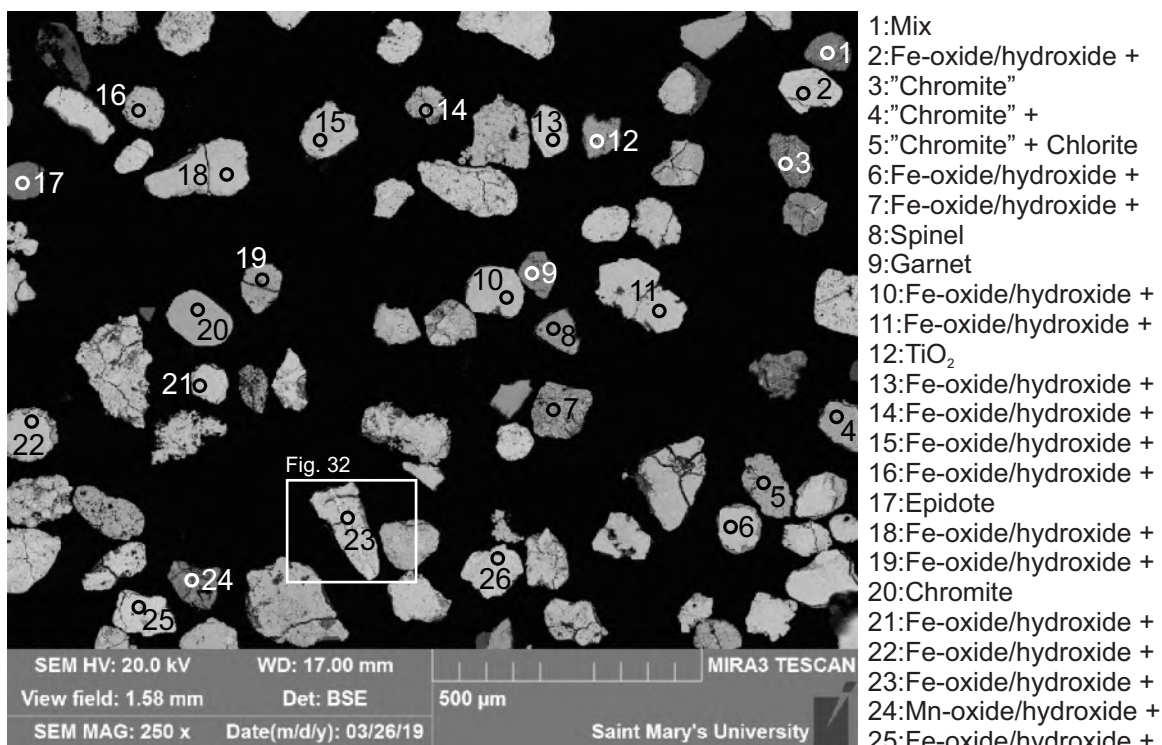

Figure B12.31: Sample S24 site 20 (SEM). Similar to Fig. 2.  
Detrital mineral grains: Chr, Spl, Grt, TiO<sub>2</sub>, Ep, Fe-oxide.

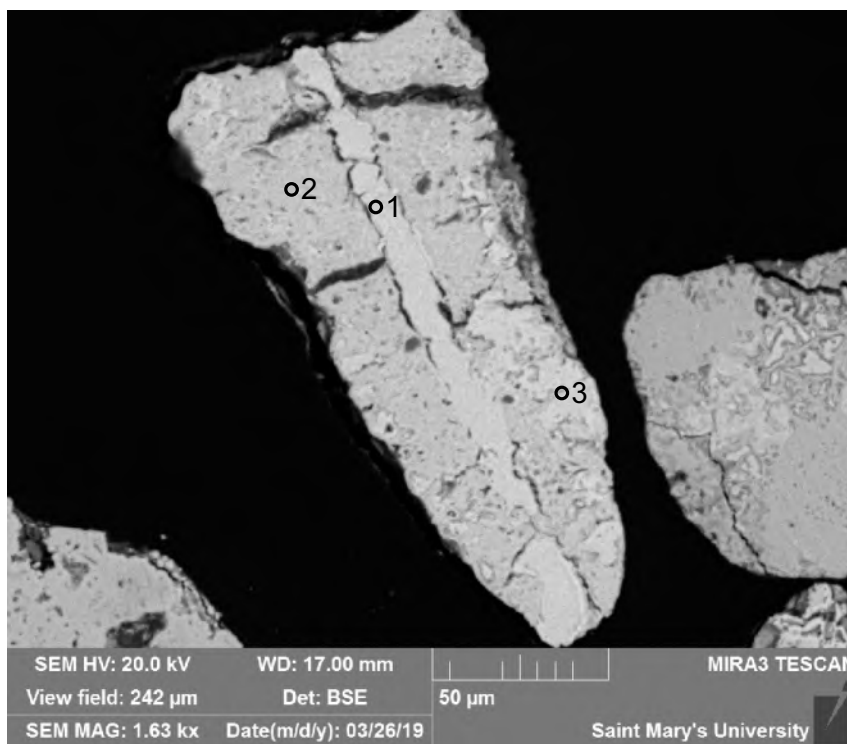

1:Fe-oxide/hydroxide +  
2:Fe-oxide/hydroxide +  
3:Fe-oxide/hydroxide +

Figure B12.32: Sample S24 site 20.1 (SEM). Probably an original detrital Fe-oxide grain affected by pedogenesis, precipitating around a rootlet. Presence of zinc.

Table B12.1: Mineral chemical analyses from sample S24.

| Sample | Site | Position | Mineral               | SiO2  | TiO2  | Al2O3 | FeO    | MnO   | MgO   | CaO   | Na2O | K2O  | P2O5  | SO3 | F     | Cl   | V2O5 | Cr2O3 | CoO | NiO  | CuO  | ZnO | ZrO2  | BaO | HfO2 | WO3  | Total | Actual Total |
|--------|------|----------|-----------------------|-------|-------|-------|--------|-------|-------|-------|------|------|-------|-----|-------|------|------|-------|-----|------|------|-----|-------|-----|------|------|-------|--------------|
| S24    | 1    | 1        | Feohy +               | 3.61  |       | 1.29  | 93.42  |       |       | 0.45  |      |      | 1.23  |     |       |      |      |       |     |      |      |     |       |     |      |      | 100   | 91           |
| S24    | 1    | 2        | Feohy +               | 5.34  |       | 2.28  | 91.23  |       |       |       |      |      | 1.14  |     |       |      |      |       |     |      |      |     |       |     |      |      | 100   | 89           |
| S24    | 1    | 3        | Feohy +               | 3.18  |       | 0.83  | 96.00  |       |       |       |      |      |       |     |       |      |      |       |     |      |      |     |       |     |      |      | 100   | 82           |
| S24    | 1    | 4        | Mnohy +               | 10.03 | 0.33  | 27.57 | 2.46   | 37.34 | 1.14  | 0.38  | 2.56 | 0.58 |       |     | 10.19 |      |      |       |     | 5.94 | 1.47 |     |       |     |      |      | 100   | 99           |
| S24    | 1    | 5        | Amph                  | 44.38 | 3.04  | 9.88  | 11.61  | 0.28  | 13.95 | 10.44 | 2.23 | 0.99 |       |     |       | 0.21 |      |       |     |      |      |     |       |     |      |      | 97    | 121          |
| S24    | 1    | 6        | Feohy +               | 5.63  |       | 8.05  | 78.59  |       |       | 0.49  |      |      | 2.41  |     |       |      |      | 0.97  |     |      |      |     |       |     |      | 3.87 | 100   | 80           |
| S24    | 1    | 7        | Feohy +               | 5.14  |       | 2.84  | 82.51  |       |       | 0.44  | 0.84 |      | 2.38  |     |       |      |      | 0.57  |     |      |      |     |       |     |      | 5.28 | 100   | 93           |
| S24    | 1    | 8        | Feohy +               | 2.31  |       | 1.25  | 92.86  |       |       | 0.36  |      |      | 1.28  |     |       |      |      |       |     |      |      |     |       |     |      | 1.93 | 100   | 98           |
| S24    | 1    | 9        | Feohy +               | 2.72  |       |       | 97.28  |       |       |       |      |      |       |     |       |      |      |       |     |      |      |     |       |     |      |      | 100   | 88           |
| S24    | 1    | 10       | Feohy +               | 19.25 |       | 9.06  | 66.76  |       | 1.43  | 0.73  |      | 1.44 | 1.33  |     |       |      |      |       |     |      |      |     |       |     |      |      | 100   | 95           |
| S24    | 1    | 11       | Feohy +               | 5.57  |       | 3.25  | 88.10  |       |       | 0.68  |      |      | 2.41  |     |       |      |      |       |     |      |      |     |       |     |      |      | 100   | 87           |
| S24    | 1    | 12       | Feohy +               | 7.31  |       | 2.39  | 89.12  | 0.47  | 0.71  |       |      |      |       |     |       |      |      |       |     |      |      |     |       |     |      |      | 100   | 85           |
| S24    | 1    | 13       | Ap                    |       |       |       | 0.88   |       |       | 44.41 |      |      | 39.38 |     | 8.07  |      |      |       |     |      |      |     |       |     |      | 7.26 | 100   | 82           |
| S24    | 1    | 14       | Grt                   | 39.54 |       | 20.50 | 30.80  | 2.93  | 3.37  | 2.86  |      |      |       |     |       |      |      |       |     |      |      |     |       |     |      |      | 100   | 120          |
| S24    | 1    | 15       | Feohy +               | 4.19  |       | 1.44  | 94.36  |       |       |       |      |      |       |     |       |      |      |       |     |      |      |     |       |     |      |      | 100   | 93           |
| S24    | 1    | 16       | Feohy +               | 5.84  |       | 3.04  | 84.97  |       |       | 0.39  | 0.92 |      | 1.18  |     |       |      |      |       |     |      |      |     |       |     |      | 3.65 | 100   | 91           |
| S24    | 1    | 17       | Feohy +               | 3.62  |       | 1.59  | 93.63  |       |       | 0.49  | 0.67 |      |       |     |       |      |      |       |     |      |      |     |       |     |      |      | 100   | 94           |
| S24    | 1    | 18       | Feohy                 |       |       |       | 100.00 |       |       |       |      |      |       |     |       |      |      |       |     |      |      |     |       |     |      |      | 100   | 81           |
| S24    | 1    | 19       | Feohy +               | 3.08  |       | 1.10  | 94.84  |       |       |       |      |      | 0.98  |     |       |      |      |       |     |      |      |     |       |     |      |      | 100   | 89           |
| S24    | 1    | 20       | Feohy +               | 3.59  |       | 1.83  | 92.98  |       |       |       |      |      | 1.14  |     |       |      |      | 0.46  |     |      |      |     |       |     |      |      | 100   | 89           |
| S24    | 1    | 21       | Feohy +               | 5.69  |       | 3.43  | 85.69  |       |       | 0.48  |      |      | 1.44  |     |       |      |      | 0.45  |     |      |      |     |       |     |      | 2.82 | 100   | 82           |
| S24    | 1    | 22       | Feohy +               | 4.37  |       | 1.52  | 93.26  |       |       |       |      |      | 0.84  |     |       |      |      |       |     |      |      |     |       |     |      |      | 100   | 84           |
| S24    | 1    | 23       | Feohy +               | 3.27  |       | 1.82  | 93.58  |       |       | 0.41  |      |      | 0.93  |     |       |      |      |       |     |      |      |     |       |     |      |      | 100   | 88           |
| S24    | 1    | 24       | Qz                    | 99.58 |       |       | 0.42   |       |       |       |      |      |       |     |       |      |      |       |     |      |      |     |       |     |      |      | 100   | 115          |
| S24    | 1    | 25       | Chr                   |       | 0.83  | 19.47 | 28.17  |       | 9.17  |       |      |      |       |     |       |      | 0.44 | 41.93 |     |      |      |     |       |     |      |      | 100   | 109          |
| S24    | 1    | 26       | Feohy +               | 3.83  |       | 1.54  | 93.25  |       |       | 0.37  |      |      | 1.01  |     |       |      |      |       |     |      |      |     |       |     |      |      | 100   | 84           |
| S24    | 1    | 27       | Qz +                  | 87.50 |       | 5.20  | 1.96   |       |       | 5.34  |      |      |       |     |       |      |      |       |     |      |      |     |       |     |      |      | 100   | 115          |
| S24    | 1    | 28       | Mix                   | 21.60 |       | 14.99 | 53.60  |       | 0.59  | 0.51  | 0.55 | 0.61 | 1.65  |     |       |      |      |       |     |      |      |     |       |     |      | 5.89 | 100   | 85           |
| S24    | 1    | 29       | TiO <sub>2</sub>      |       | 99.49 |       | 0.51   |       |       |       |      |      |       |     |       |      |      |       |     |      |      |     |       |     |      |      | 100   | 107          |
| S24    | 1    | 30       | Feohy +               | 4.32  |       | 1.33  | 92.36  |       |       |       |      |      | 1.99  |     |       |      |      |       |     |      |      |     |       |     |      |      | 100   | 80           |
| S24    | 1    | 31       | Feohy +               | 4.46  |       | 2.12  | 92.06  |       |       | 0.34  |      |      | 1.02  |     |       |      |      |       |     |      |      |     |       |     |      |      | 100   | 83           |
| S24    | 1    | 32       | TiO <sub>2</sub> + Qz | 18.00 | 78.71 | 1.92  | 0.70   |       |       |       |      | 0.67 |       |     |       |      |      |       |     |      |      |     |       |     |      |      | 100   | 108          |
| S24    | 1    | 33       | Qz                    | 97.83 |       |       | 1.18   |       |       | 0.99  |      |      |       |     |       |      |      |       |     |      |      |     |       |     |      |      | 100   | 119          |
| S24    | 1    | 34       | Feohy +               | 3.83  |       | 1.54  | 93.53  |       |       |       |      |      | 1.09  |     |       |      |      |       |     |      |      |     |       |     |      |      | 100   | 84           |
| S24    | 1    | 35       | Spl                   |       |       | 40.68 | 16.63  |       | 13.17 |       |      |      |       |     |       |      |      | 29.52 |     |      |      |     |       |     |      |      | 100   | 114          |
| S24    | 1    | 36       | Feohy +               | 4.53  |       | 1.38  | 92.55  |       |       | 0.47  |      |      | 1.07  |     |       |      |      |       |     |      |      |     |       |     |      |      | 100   | 88           |
| S24    | 1    | 37       | Feohy +               | 3.13  |       | 0.95  | 95.92  |       |       |       |      |      |       |     |       |      |      |       |     |      |      |     |       |     |      |      | 100   | 81           |
| S24    | 1    | 38       | Chr                   |       |       | 16.82 | 27.59  |       | 9.39  |       |      |      |       |     |       |      |      | 46.20 |     |      |      |     |       |     |      |      | 100   | 113          |
| S24    | 1    | 39       | TiO <sub>2</sub>      |       | 99.35 |       | 0.65   |       |       |       |      |      |       |     |       |      |      |       |     |      |      |     |       |     |      |      | 100   | 111          |
| S24    | 1    | 40       | Grt                   | 39.89 |       | 20.92 | 31.56  | 1.41  | 3.63  | 2.59  |      |      |       |     |       |      |      |       |     |      |      |     |       |     |      |      | 100   | 116          |
| S24    | 1    | 41       | Qz +                  | 59.03 |       | 1.49  | 5.28   |       | 32.19 | 0.33  | 0.65 |      |       |     |       |      |      | 1.02  |     |      |      |     |       |     |      |      | 100   | 119          |
| S24    | 2    | 1        | Zrn                   | 30.93 |       |       |        |       |       |       |      |      |       |     |       |      |      |       |     |      |      |     | 69.07 |     |      |      | 100   | 128          |
| S24    | 2    | 2        | Feohy +               | 6.46  |       | 1.13  | 91.58  |       |       |       |      |      | 0.83  |     |       |      |      |       |     |      |      |     |       |     |      |      | 100   | 88           |
| S24    | 2    | 3        | Feohy +               | 3.30  |       | 1.53  | 92.37  |       |       | 0.58  |      |      | 2.22  |     |       |      |      |       |     |      |      |     |       |     |      |      | 100   | 101          |
| S24    | 2    | 4        | Feohy +               | 8.47  |       | 5.46  | 82.09  |       |       | 0.48  |      |      | 2.69  |     |       |      |      |       |     |      | 0.81 |     |       |     |      |      | 100   | 87           |

Table B12.1: Mineral chemical analyses from sample S24.

| Sample | Site | Position | Mineral               | SiO2  | TiO2  | Al2O3 | FeO   | MnO   | MgO   | CaO   | Na2O | K2O  | P2O5  | SO3  | F    | Cl | V2O5 | Cr2O3 | CoO | NiO  | CuO  | ZnO | ZrO2 | BaO | HfO2 | WO3  | Total | Actual Total |
|--------|------|----------|-----------------------|-------|-------|-------|-------|-------|-------|-------|------|------|-------|------|------|----|------|-------|-----|------|------|-----|------|-----|------|------|-------|--------------|
| S24    | 2    | 5        | TiO <sub>2</sub> +    | 1.90  | 91.66 | 1.08  | 5.04  |       |       | 0.32  |      |      |       |      |      |    |      |       |     |      |      |     |      |     |      |      | 100   | 84           |
| S24    | 2    | 6        | Spl                   |       |       | 37.59 | 15.95 |       | 15.90 |       |      |      |       |      |      |    |      | 30.55 |     |      |      |     |      |     |      |      | 100   | 116          |
| S24    | 2    | 7        | Feohy +               | 4.10  |       | 1.74  | 91.38 |       |       | 0.52  |      |      | 1.75  |      |      |    |      | 0.51  |     |      |      |     |      |     |      |      | 100   | 92           |
| S24    | 2    | 8        | Grt + Ms?             | 30.56 | 0.87  | 25.39 | 8.60  | 24.40 | 1.96  | 0.41  |      | 1.92 |       |      | 3.05 |    |      |       |     | 2.83 |      |     |      |     |      |      | 100   | 95           |
| S24    | 2    | 9        | Ms + Chl              | 50.19 | 0.57  | 23.02 | 7.98  | 6.62  | 1.64  | 0.40  | 1.41 | 3.07 | 0.74  |      |      |    |      |       |     |      |      |     |      |     | 4.37 | 100  | 96    |              |
| S24    | 2    | 10       | Feohy +               | 3.31  |       | 1.90  | 92.42 | 1.06  |       |       |      |      | 0.89  |      |      |    |      | 0.42  |     |      |      |     |      |     |      |      | 100   | 92           |
| S24    | 2    | 11       | TiO <sub>2</sub> + Qz | 11.44 | 86.44 | 0.53  | 1.31  |       |       | 0.27  |      |      |       |      |      |    |      |       |     |      |      |     |      |     |      |      | 100   | 113          |
| S24    | 2    | 12       | Feohy +               | 8.19  |       | 3.79  | 87.31 |       | 0.71  |       |      |      |       |      |      |    |      |       |     |      |      |     |      |     |      |      | 100   | 92           |
| S24    | 2    | 13       | Grt                   | 41.37 |       | 21.78 | 18.64 | 0.39  | 10.21 | 7.61  |      |      |       |      |      |    |      |       |     |      |      |     |      |     |      |      | 100   | 114          |
| S24    | 2    | 14       | Mix                   | 60.82 | 0.50  | 15.77 | 6.81  | 2.33  | 1.51  |       | 1.80 | 1.88 |       |      | 8.30 |    |      | 0.28  |     |      |      |     |      |     |      |      | 100   | 120          |
| S24    | 2    | 15       | Feohy +               | 3.71  |       | 2.16  | 91.97 |       |       | 0.62  |      |      | 1.12  |      |      |    |      | 0.41  |     |      |      |     |      |     |      |      | 100   | 90           |
| S24    | 2    | 16       | Spl                   |       |       | 31.53 | 21.19 |       | 12.97 |       |      |      |       |      |      |    |      | 34.31 |     |      |      |     |      |     |      |      | 100   | 112          |
| S24    | 2    | 17       | Feohy +               | 5.60  |       | 1.99  | 87.51 |       |       |       |      |      | 1.85  |      |      |    |      |       |     |      |      |     |      |     | 3.05 | 100  | 86    |              |
| S24    | 2    | 18       | Feohy +               | 3.38  |       | 3.63  | 90.90 |       |       | 0.64  |      |      | 1.45  |      |      |    |      |       |     |      |      |     |      |     |      |      | 100   | 77           |
| S24    | 2    | 19       | Ep                    | 40.39 |       | 26.57 | 7.69  |       |       | 22.35 |      |      |       |      |      |    |      |       |     |      |      |     |      |     |      |      | 97    | 107          |
| S24    | 2    | 20       | Chr                   |       |       | 23.95 | 16.67 |       | 11.40 |       |      |      |       |      |      |    |      | 47.98 |     |      |      |     |      |     |      |      | 100   | 106          |
| S24    | 2    | 21       | Amph                  | 42.37 | 3.77  | 12.26 | 10.07 |       | 13.85 | 11.04 | 2.89 | 0.75 |       |      |      |    |      |       |     |      |      |     |      |     |      |      | 97    | 114          |
| S24    | 2    | 22       | Feohy +               | 4.59  | 0.51  | 3.29  | 85.05 |       |       | 0.56  | 0.88 |      | 2.04  |      |      |    |      |       |     |      |      |     |      |     | 3.07 | 100  | 85    |              |
| S24    | 2    | 23       | Mix                   | 64.04 | 0.79  | 14.19 | 6.88  | 3.61  | 1.17  |       | 1.09 | 1.44 |       |      | 6.79 |    |      |       |     |      |      |     |      |     |      |      | 100   | 107          |
| S24    | 2    | 24       | Feohy +               | 7.04  |       | 1.26  | 90.61 |       |       |       |      |      | 1.09  |      |      |    |      |       |     |      |      |     |      |     |      |      | 100   | 88           |
| S24    | 2    | 25       | Spl                   |       |       | 33.49 | 16.22 |       | 12.61 |       |      |      |       |      |      |    |      | 37.68 |     |      |      |     |      |     |      |      | 100   | 115          |
| S24    | 2    | 26       | Ap                    |       |       |       |       |       |       | 47.27 | 0.71 |      | 40.39 | 1.40 | 8.71 |    |      |       |     |      |      |     |      |     | 1.51 | 100  | 119   |              |
| S24    | 2    | 27       | Chr                   |       |       | 21.20 | 17.33 |       | 10.67 |       |      |      |       |      |      |    |      | 50.80 |     |      |      |     |      |     |      |      | 100   | 106          |
| S24    | 2    | 28       | Feohy +               | 15.41 |       | 6.74  | 74.26 |       | 0.76  | 0.65  |      | 0.47 | 1.71  |      |      |    |      |       |     |      |      |     |      |     |      |      | 100   | 77           |
| S24    | 2    | 29       | TiO <sub>2</sub>      |       | 99.53 |       | 0.47  |       |       |       |      |      |       |      |      |    |      |       |     |      |      |     |      |     |      |      | 100   | 108          |
| S24    | 2    | 30       | Chr                   |       |       | 17.76 | 19.53 |       | 9.55  |       |      |      |       |      |      |    |      | 53.15 |     |      |      |     |      |     |      |      | 100   | 100          |
| S24    | 2.1  | 1        | Feohy +               | 4.35  |       | 1.52  | 91.69 |       |       | 0.40  |      |      | 1.53  |      |      |    |      | 0.50  |     |      |      |     |      |     |      |      | 100   | 89           |
| S24    | 2.1  | 2        | Feohy +               | 3.27  | 0.57  | 2.65  | 82.62 |       |       | 0.57  | 0.92 |      | 3.17  |      |      |    |      | 0.97  |     |      |      |     |      |     | 5.28 | 100  | 88    |              |
| S24    | 2.1  | 3        | Feohy +               | 3.22  |       | 1.86  | 92.65 |       |       | 0.99  |      |      | 1.29  |      |      |    |      |       |     |      |      |     |      |     |      |      | 100   | 89           |
| S24    | 2.1  | 4        | Feohy +               | 6.01  |       | 4.60  | 85.75 |       | 0.78  | 0.94  |      |      | 1.92  |      |      |    |      |       |     |      |      |     |      |     |      |      | 100   | 85           |
| S24    | 2.1  | 5        | Feohy +               | 7.31  |       | 2.03  | 88.72 |       |       | 0.68  |      |      | 1.25  |      |      |    |      |       |     |      |      |     |      |     |      |      | 100   | 81           |
| S24    | 2.1  | 6        | Spl                   |       |       | 37.24 | 16.36 |       | 16.20 |       |      |      |       |      |      |    |      | 30.21 |     |      |      |     |      |     |      |      | 100   | 114          |
| S24    | 3    | 1        | Mix                   | 36.48 | 0.39  | 24.38 | 32.13 |       | 0.97  |       | 1.53 | 1.24 | 1.28  |      |      |    |      | 0.51  |     |      |      |     |      |     | 1.10 | 100  | 98    |              |
| S24    | 3    | 2        | Feohy +               | 6.74  |       | 2.82  | 89.44 |       |       |       |      |      | 1.00  |      |      |    |      |       |     |      |      |     |      |     |      |      | 100   | 85           |
| S24    | 3    | 3        | Ilm                   |       | 51.45 |       | 46.33 | 2.23  |       |       |      |      |       |      |      |    |      |       |     |      |      |     |      |     |      |      | 100   | 106          |
| S24    | 3    | 4        | Chr                   |       | 0.40  | 29.55 | 19.68 |       | 14.67 |       |      |      |       |      |      |    |      | 35.70 |     |      |      |     |      |     |      |      | 100   | 112          |
| S24    | 3    | 5        | Feohy +               | 5.35  |       | 1.17  | 91.40 | 0.95  |       | 0.43  |      |      |       |      |      |    |      |       |     |      | 0.70 |     |      |     |      |      | 100   | 84           |
| S24    | 3    | 6        | Feohy +               | 4.84  |       | 2.03  | 91.28 | 0.45  |       | 0.32  |      |      | 1.07  |      |      |    |      |       |     |      |      |     |      |     |      |      | 100   | 96           |
| S24    | 3    | 7        | Grt                   | 41.50 |       | 21.06 | 2.77  |       |       | 34.66 |      |      |       |      |      |    |      |       |     |      |      |     |      |     |      |      | 100   | 126          |
| S24    | 3    | 8        | Feohy +               | 4.84  |       | 1.42  | 91.74 | 0.47  |       | 0.37  |      |      | 1.15  |      |      |    |      |       |     |      |      |     |      |     |      |      | 100   | 94           |
| S24    | 3    | 9        | Feld + Chl            | 54.34 | 0.78  | 20.18 | 9.53  | 6.16  | 1.75  |       | 1.06 | 2.60 | 0.72  |      |      |    |      |       |     |      |      |     |      |     | 2.88 | 100  | 96    |              |
| S24    | 3    | 10       | Feohy +               |       | 6.57  | 3.76  | 86.16 | 1.18  | 2.33  |       |      |      |       |      |      |    |      |       |     |      |      |     |      |     |      |      | 100   | 105          |
| S24    | 3    | 11       | Mix                   | 25.45 | 0.49  | 19.51 | 45.92 |       | 1.29  | 0.32  | 1.45 | 0.69 | 1.71  | 0.68 |      |    |      |       |     |      |      |     |      |     |      | 2.50 | 100   | 88           |
| S24    | 3    | 12       | Feohy +               | 6.26  | 1.80  | 3.63  | 85.83 |       |       | 0.49  |      |      | 2.00  |      |      |    |      |       |     |      |      |     |      |     |      |      | 100   | 88           |
| S24    | 3    | 13       | Ep                    | 39.94 |       | 20.62 | 13.93 |       |       | 22.50 |      |      |       |      |      |    |      |       |     |      |      |     |      |     |      |      | 97    | 113          |



Table B12.1: Mineral chemical analyses from sample S24.

| Sample | Site | Position | Mineral | SiO2  | TiO2  | Al2O3 | FeO   | MnO   | MgO   | CaO   | Na2O | K2O  | P2O5 | SO3 | F    | Cl | V2O5 | Cr2O3 | CoO | NiO  | CuO  | ZnO  | ZrO2  | BaO | HfO2 | WO3  | Total | Actual Total |
|--------|------|----------|---------|-------|-------|-------|-------|-------|-------|-------|------|------|------|-----|------|----|------|-------|-----|------|------|------|-------|-----|------|------|-------|--------------|
| S24    | 3    | 14       | Ilm     |       | 53.01 |       | 43.82 | 2.62  | 0.55  |       |      |      |      |     |      |    |      |       |     |      |      |      |       |     |      |      | 100   | 108          |
| S24    | 3    | 15       | Feohy + | 8.45  | 0.62  | 5.77  | 78.11 |       |       | 0.45  |      | 0.37 | 2.52 |     |      |    |      |       |     |      |      |      |       |     |      | 3.71 | 100   | 80           |
| S24    | 3    | 16       | Feohy + | 3.59  |       | 1.22  | 93.42 |       |       | 0.40  |      |      | 1.37 |     |      |    |      |       |     |      |      |      |       |     |      |      | 100   | 87           |
| S24    | 3    | 17       | Feohy + | 3.79  |       | 2.04  | 92.55 | 0.51  |       |       |      |      | 1.11 |     |      |    |      |       |     |      |      |      |       |     |      |      | 100   | 86           |
| S24    | 3    | 18       | Mix     | 26.17 | 0.49  | 26.47 | 4.10  | 25.94 | 2.55  |       | 1.12 | 2.17 |      |     | 7.75 |    |      |       |     | 3.24 |      |      |       |     |      |      | 100   | 96           |
| S24    | 3    | 19       | Feohy + |       | 8.18  | 3.33  | 85.37 | 1.16  | 1.97  |       |      |      |      |     |      |    |      |       |     |      |      |      |       |     |      |      | 100   | 100          |
| S24    | 3    | 20       | Feohy + | 7.66  |       | 3.26  | 87.55 |       |       |       |      |      | 1.52 |     |      |    |      |       |     |      |      |      |       |     |      |      | 100   | 79           |
| S24    | 3    | 21       | Feohy + | 2.63  |       | 2.00  | 92.75 |       |       | 0.57  |      |      | 1.42 |     |      |    | 0.63 |       |     |      |      |      |       |     |      |      | 100   | 87           |
| S24    | 3    | 22       | Spl     |       |       | 34.06 | 16.20 |       | 15.51 |       |      |      |      |     |      |    |      | 34.22 |     |      |      |      |       |     |      |      | 100   | 109          |
| S24    | 3    | 23       | Feohy + | 6.35  |       | 5.85  | 81.11 |       | 0.66  | 0.49  |      |      | 2.37 |     |      |    | 0.70 |       |     |      | 1.22 | 1.26 |       |     |      |      | 100   | 77           |
| S24    | 3    | 24       | Grt +   | 38.06 | 1.25  | 16.51 | 3.52  |       | 1.87  | 33.77 |      |      |      |     | 5.02 |    |      |       |     |      |      |      |       |     |      |      | 100   | 106          |
| S24    | 3    | 25       | Chr     |       |       | 20.05 | 17.03 |       | 10.68 |       |      |      |      |     |      |    | 0.47 | 51.77 |     |      |      |      |       |     |      |      | 100   | 106          |
| S24    | 3    | 26       | Qz      | 99.66 |       |       | 0.34  |       |       |       |      |      |      |     |      |    |      |       |     |      |      |      |       |     |      |      | 100   | 114          |
| S24    | 3    | 27       | Feohy + | 9.60  |       | 5.52  | 82.24 |       |       | 0.41  |      |      | 2.23 |     |      |    |      |       |     |      |      |      |       |     |      |      | 100   | 76           |
| S24    | 3    | 28       | Feohy + | 4.17  |       | 1.18  | 92.56 | 1.12  |       |       |      |      | 0.97 |     |      |    |      |       |     |      |      |      |       |     |      |      | 100   | 75           |
| S24    | 3    | 29       | Feohy + | 3.21  |       | 1.59  | 95.20 |       |       |       |      |      |      |     |      |    |      |       |     |      |      |      |       |     |      |      | 100   | 79           |
| S24    | 3    | 30       | Qz      | 99.72 |       |       | 0.28  |       |       |       |      |      |      |     |      |    |      |       |     |      |      |      |       |     |      |      | 100   | 112          |
| S24    | 3    | 31       | Chr     |       |       | 20.50 | 24.14 |       | 10.25 |       |      |      |      |     |      |    |      | 45.12 |     |      |      |      |       |     |      |      | 100   | 100          |
| S24    | 3    | 32       | Feohy + | 8.24  |       | 8.01  | 79.58 |       | 0.80  | 0.79  |      |      | 2.57 |     |      |    |      |       |     |      |      |      |       |     |      |      | 100   | 70           |
| S24    | 4    | 1        | Zrn     | 30.93 |       |       |       |       |       |       |      |      |      |     |      |    |      |       |     |      |      |      | 69.07 |     |      |      | 100   | 118          |
| S24    | 4    | 2        | Feohy + | 13.26 | 0.90  | 5.86  | 77.89 |       |       |       |      | 1.16 | 0.94 |     |      |    |      |       |     |      |      |      |       |     |      |      | 100   | 41           |
| S24    | 4    | 3        | Feohy + | 3.17  |       | 1.80  | 93.12 |       |       | 0.71  |      |      | 1.19 |     |      |    |      |       |     |      |      |      |       |     |      |      | 100   | 90           |
| S24    | 4    | 4        | Feohy + | 7.24  |       | 2.80  | 88.02 |       |       | 0.53  |      |      | 1.42 |     |      |    |      |       |     |      |      |      |       |     |      |      | 100   | 81           |
| S24    | 4    | 5        | Feohy + | 3.88  |       | 1.20  | 94.43 |       |       | 0.49  |      |      |      |     |      |    |      |       |     |      |      |      |       |     |      |      | 100   | 88           |
| S24    | 4    | 6        | Zrn     | 31.35 |       | 0.57  | 0.74  |       |       | 0.39  |      |      |      |     |      |    |      |       |     |      |      |      | 66.95 |     |      |      | 100   | 117          |
| S24    | 4    | 7        | Mix     | 24.78 | 0.42  | 13.19 | 54.74 | 0.54  | 1.27  | 0.63  | 0.61 | 1.31 | 2.52 |     |      |    |      |       |     |      |      |      |       |     |      |      | 100   | 96           |
| S24    | 4    | 8        | Feohy + |       | 13.98 | 2.93  | 79.30 | 0.65  | 2.44  |       |      |      |      |     |      |    | 0.69 |       |     |      |      |      |       |     |      |      | 100   | 108          |
| S24    | 4    | 9        | Grt     | 39.69 |       | 20.75 | 19.50 | 15.99 | 2.63  | 1.44  |      |      |      |     |      |    |      |       |     |      |      |      |       |     |      |      | 100   | 125          |
| S24    | 4    | 10       | Grt     | 39.40 |       | 20.88 | 23.15 | 6.84  | 0.72  | 9.00  |      |      |      |     |      |    |      |       |     |      |      |      |       |     |      |      | 100   | 119          |
| S24    | 4    | 11       | Feohy + | 2.72  |       |       | 97.28 |       |       |       |      |      |      |     |      |    |      |       |     |      |      |      |       |     |      |      | 100   | 83           |
| S24    | 4    | 12       | Feohy + | 4.27  |       | 1.23  | 94.02 |       |       | 0.48  |      |      |      |     |      |    |      |       |     |      |      |      |       |     |      |      | 100   | 88           |
| S24    | 4    | 13       | Amph    | 41.81 | 3.97  | 12.47 | 10.12 |       | 14.23 | 11.31 | 2.47 | 0.62 |      |     |      |    |      | 0.49  |     |      |      |      |       |     |      |      | 97    | 114          |
| S24    | 4    | 14       | Feohy + | 3.42  |       | 1.40  | 90.03 | 0.78  |       | 0.47  |      |      | 0.99 |     |      |    |      |       |     |      |      |      |       |     |      | 2.41 | 100   | 89           |
| S24    | 4    | 15       | Feohy + | 4.61  |       | 2.27  | 90.27 |       |       | 0.85  |      |      | 2.00 |     |      |    |      |       |     |      |      |      |       |     |      |      | 100   | 83           |
| S24    | 4    | 16       | Opx     | 59.40 |       |       | 5.34  |       | 34.81 | 0.45  |      |      |      |     |      |    |      |       |     |      |      |      |       |     |      |      | 100   | 112          |
| S24    | 4    | 17       | Feohy + | 2.47  |       | 1.21  | 96.32 |       |       |       |      |      |      |     |      |    |      |       |     |      |      |      |       |     |      |      | 100   | 83           |
| S24    | 4    | 18       | Feohy + | 4.32  |       | 1.88  | 91.59 | 0.55  |       | 0.44  |      |      | 1.23 |     |      |    |      |       |     |      |      |      |       |     |      |      | 100   | 80           |
| S24    | 4    | 19       | Tur     | 38.13 | 0.51  | 31.83 | 6.57  |       | 7.13  | 0.64  | 2.18 |      |      |     |      |    |      |       |     |      |      |      |       |     |      |      | 87    | 98           |
| S24    | 4    | 20       | Feohy + | 4.07  |       | 1.40  | 92.76 |       |       | 0.50  |      |      | 1.26 |     |      |    |      |       |     |      |      |      |       |     |      |      | 100   | 78           |
| S24    | 4    | 21       | Grt     | 39.43 |       | 20.68 | 25.56 | 5.74  | 0.86  | 7.72  |      |      |      |     |      |    |      |       |     |      |      |      |       |     |      |      | 100   | 105          |
| S24    | 4    | 22       | Mix     | 32.66 | 45.59 | 12.78 | 3.09  |       | 0.84  |       | 0.43 | 2.57 |      |     | 2.03 |    |      |       |     |      |      |      |       |     |      |      | 100   | 83           |
| S24    | 4    | 23       | Ilm     |       | 54.00 |       | 43.77 | 2.23  |       |       |      |      |      |     |      |    |      |       |     |      |      |      |       |     |      |      | 100   | 106          |
| S24    | 4    | 24       | Feohy + | 4.90  |       | 1.44  | 92.95 |       | 0.71  |       |      |      |      |     |      |    |      |       |     |      |      |      |       |     |      |      | 100   | 86           |
| S24    | 4    | 25       | Grt     | 39.86 |       | 20.53 | 26.07 | 3.82  | 1.32  | 8.40  |      |      |      |     |      |    |      |       |     |      |      |      |       |     |      |      | 100   | 109          |
| S24    | 4    | 26       | Amph    | 52.99 | 0.56  | 4.11  | 10.82 | 0.31  | 15.52 | 11.71 | 0.65 | 0.32 |      |     |      |    |      |       |     |      |      |      |       |     |      |      | 97    | 109          |
| S24    | 4    | 27       | Feohy + | 8.06  |       | 9.69  | 74.52 |       |       | 0.43  |      |      | 2.91 |     |      |    |      |       |     |      |      |      |       |     |      | 4.39 | 100   | 72           |

Table B12.1: Mineral chemical analyses from sample S24.

| Sample | Site | Position | Mineral                | SiO2  | TiO2  | Al2O3 | FeO   | MnO  | MgO   | CaO   | Na2O | K2O  | P2O5 | SO3 | F    | Cl | V2O5 | Cr2O3 | CoO | NiO  | CuO | ZnO | ZrO2 | BaO | HfO2 | WO3 | Total | Actual Total |
|--------|------|----------|------------------------|-------|-------|-------|-------|------|-------|-------|------|------|------|-----|------|----|------|-------|-----|------|-----|-----|------|-----|------|-----|-------|--------------|
| S24    | 4    | 28       | Feohy +                | 7.36  |       | 4.49  | 84.38 |      | 0.90  | 0.84  |      |      | 2.03 |     |      |    |      |       |     |      |     |     |      |     |      |     | 100   | 76           |
| S24    | 4    | 29       | Feohy +                | 3.51  |       | 1.07  | 95.09 |      |       | 0.33  |      |      |      |     |      |    |      |       |     |      |     |     |      |     |      |     | 100   | 82           |
| S24    | 4    | 30       | Pl (An)                | 44.76 |       | 33.78 | 1.75  |      |       | 18.39 |      |      |      |     | 1.32 |    |      |       |     |      |     |     |      |     |      |     | 100   | 93           |
| S24    | 4    | 31       | Feohy +                | 5.55  |       | 2.86  | 89.73 |      |       | 0.57  |      |      | 1.29 |     |      |    |      |       |     |      |     |     |      |     |      |     | 100   | 80           |
| S24    | 4.1  | 1        | Feohy +                | 5.32  | 0.46  | 2.34  | 85.13 | 0.77 |       | 0.47  | 0.74 |      | 1.97 |     |      |    |      |       |     |      |     |     |      |     | 2.81 | 100 | 87    |              |
| S24    | 4.1  | 2        | Mix                    | 45.07 | 1.25  | 21.53 | 12.83 | 5.04 | 1.35  |       | 1.36 | 2.73 | 0.70 |     | 5.24 |    |      |       |     |      |     |     |      |     | 2.89 | 100 | 92    |              |
| S24    | 4.1  | 3        | Mix                    | 24.04 | 0.64  | 16.50 | 53.78 |      | 0.96  | 0.62  | 0.82 | 1.05 | 1.60 |     |      |    |      |       |     |      |     |     |      |     |      | 100 | 66    |              |
| S24    | 4.1  | 4        | Feohy +                | 5.04  |       | 1.54  | 90.53 | 1.55 |       | 0.46  |      |      | 0.88 |     |      |    |      |       |     |      |     |     |      |     |      |     | 100   | 83           |
| S24    | 4.1  | 5        | Feohy +                | 5.98  | 0.68  | 6.25  | 76.68 |      |       | 0.91  |      |      | 2.41 |     |      |    |      |       |     |      |     |     |      |     | 7.09 | 100 | 70    |              |
| S24    | 4.1  | 6        | Feohy +                | 6.79  | 0.72  | 6.18  | 78.00 |      |       | 0.64  |      |      | 2.09 |     |      |    |      |       |     |      |     |     |      |     | 5.57 | 100 | 72    |              |
| S24    | 5    | 1        | Qz                     | 98.11 |       | 1.33  | 0.57  |      |       |       |      |      |      |     |      |    |      |       |     |      |     |     |      |     |      |     | 100   | 104          |
| S24    | 5    | 2        | Grt                    | 39.69 |       | 20.89 | 32.51 | 0.88 | 4.07  | 1.96  |      |      |      |     |      |    |      |       |     |      |     |     |      |     |      |     | 100   | 113          |
| S24    | 5    | 3        | Feohy +                | 2.92  |       | 1.29  | 95.39 |      |       | 0.41  |      |      |      |     |      |    |      |       |     |      |     |     |      |     |      |     | 100   | 86           |
| S24    | 5    | 4        | TiO <sub>2</sub> + Chl | 8.79  | 80.43 | 5.73  | 3.22  |      | 1.09  |       |      | 0.74 |      |     |      |    |      |       |     |      |     |     |      |     |      |     | 100   | 105          |
| S24    | 5    | 5        | Feohy +                | 3.82  |       | 1.71  | 92.26 |      |       |       |      |      | 2.21 |     |      |    |      |       |     |      |     |     |      |     |      |     | 100   | 84           |
| S24    | 5    | 6        | Feohy +                | 3.72  |       | 1.63  | 93.03 |      |       | 0.44  |      |      | 1.18 |     |      |    |      |       |     |      |     |     |      |     |      |     | 100   | 80           |
| S24    | 5    | 7        | Feohy +                | 5.76  |       | 3.24  | 88.83 |      |       | 0.46  |      |      | 1.06 |     |      |    | 0.64 |       |     |      |     |     |      |     |      |     | 100   | 78           |
| S24    | 5    | 8        | Ep                     | 40.72 |       | 25.38 | 8.57  |      |       | 22.32 |      |      |      |     |      |    |      |       |     |      |     |     |      |     |      |     | 97    | 108          |
| S24    | 5    | 9        | Feohy +                | 4.15  |       | 2.19  | 91.79 |      |       | 0.66  |      |      | 1.21 |     |      |    |      |       |     |      |     |     |      |     |      |     | 100   | 79           |
| S24    | 5    | 10       | Spl                    |       |       | 39.42 | 17.15 |      | 15.64 |       |      |      |      |     |      |    |      | 27.79 |     |      |     |     |      |     |      |     | 100   | 107          |
| S24    | 5    | 11       | Feohy +                | 2.10  |       | 2.04  | 93.72 |      |       | 0.44  |      |      | 1.30 |     |      |    |      | 0.40  |     |      |     |     |      |     |      |     | 100   | 88           |
| S24    | 5    | 12       | Feohy +                | 5.41  |       | 6.50  | 82.87 |      |       | 0.83  |      |      | 3.06 |     |      |    |      |       |     | 1.34 |     |     |      |     |      |     | 100   | 77           |
| S24    | 5    | 13       | Feohy +                | 1.81  |       | 1.02  | 95.82 |      |       | 0.42  |      |      | 0.92 |     |      |    |      |       |     |      |     |     |      |     |      |     | 100   | 85           |
| S24    | 5    | 14       | Feohy +                | 9.88  |       | 6.90  | 75.55 |      | 0.67  | 0.73  |      |      | 2.55 |     |      |    |      | 0.42  |     |      |     |     |      |     | 3.30 | 100 | 76    |              |
| S24    | 5    | 15       | Feohy +                | 4.29  |       | 1.62  | 92.54 |      |       | 0.50  |      |      | 1.05 |     |      |    |      |       |     |      |     |     |      |     |      |     | 100   | 76           |
| S24    | 5    | 16       | Grt                    | 40.25 |       | 20.89 | 29.56 | 0.50 | 3.64  | 5.16  |      |      |      |     |      |    |      |       |     |      |     |     |      |     |      |     | 100   | 105          |
| S24    | 5    | 17       | Feohy +                |       | 6.07  | 2.53  | 88.27 | 0.93 | 1.52  |       |      |      |      |     |      |    | 0.67 |       |     |      |     |     |      |     |      |     | 100   | 91           |
| S24    | 5    | 18       | Feohy +                | 4.22  |       | 1.50  | 91.52 |      |       | 0.42  |      |      | 1.87 |     |      |    |      | 0.47  |     |      |     |     |      |     |      |     | 100   | 81           |
| S24    | 5    | 19       | Feohy +                | 9.11  |       | 5.80  | 82.68 |      |       | 0.45  |      |      | 1.96 |     |      |    |      |       |     |      |     |     |      |     |      |     | 100   | 76           |
| S24    | 5    | 20       | Feohy +                | 5.18  |       | 1.73  | 91.53 |      |       | 0.63  |      |      | 0.94 |     |      |    |      |       |     |      |     |     |      |     |      |     | 100   | 74           |
| S24    | 5    | 21       | Feohy +                | 3.01  |       | 4.34  | 91.27 |      |       |       |      |      | 1.38 |     |      |    |      |       |     |      |     |     |      |     |      |     | 100   | 85           |
| S24    | 5    | 22       | TiO <sub>2</sub> + Qz  | 27.24 | 71.13 | 0.77  | 0.86  |      |       |       |      |      |      |     |      |    |      |       |     |      |     |     |      |     |      |     | 100   | 116          |
| S24    | 5    | 23       | Qz +                   | 92.40 |       | 0.84  | 6.45  |      | 0.31  |       |      |      |      |     |      |    |      |       |     |      |     |     |      |     |      |     | 100   | 114          |
| S24    | 5    | 24       | Qz + Feohy             | 50.72 |       | 0.76  | 48.52 |      |       |       |      |      |      |     |      |    |      |       |     |      |     |     |      |     |      |     | 100   | 104          |
| S24    | 5    | 25       | Ep                     | 40.36 |       | 26.50 | 7.27  |      |       | 22.87 |      |      |      |     |      |    |      |       |     |      |     |     |      |     |      |     | 97    | 117          |
| S24    | 5    | 26       | Mix                    | 77.41 |       | 8.41  | 10.80 |      | 1.53  |       | 0.76 | 1.09 |      |     |      |    |      |       |     |      |     |     |      |     |      |     | 100   | 87           |
| S24    | 5    | 27       | Feohy +                | 3.57  |       | 1.88  | 92.38 |      |       | 0.47  |      |      | 1.69 |     |      |    |      |       |     |      |     |     |      |     |      |     | 100   | 87           |
| S24    | 5    | 28       | Feohy +                | 7.24  | 0.62  | 4.17  | 80.00 |      |       | 0.51  | 0.83 |      | 2.00 |     |      |    |      |       |     |      |     |     |      |     | 4.62 | 100 | 85    |              |
| S24    | 6    | 1        | Spl                    |       |       | 35.24 | 16.49 |      | 14.37 |       |      |      |      |     |      |    |      | 33.89 |     |      |     |     |      |     |      |     | 100   | 110          |
| S24    | 6    | 2        | Feohy +                | 3.39  |       | 3.32  | 89.15 |      |       | 0.62  |      |      | 1.27 |     |      |    |      |       |     |      |     |     |      |     | 2.25 | 100 | 81    |              |
| S24    | 6    | 3        | TiO <sub>2</sub>       |       | 99.16 |       | 0.84  |      |       |       |      |      |      |     |      |    |      |       |     |      |     |     |      |     |      |     | 100   | 116          |
| S24    | 6    | 4        | Feohy +                | 4.16  |       | 1.56  | 92.32 |      |       | 0.42  |      |      | 1.15 |     |      |    |      | 0.39  |     |      |     |     |      |     |      |     | 100   | 94           |
| S24    | 6    | 5        | Feohy +                | 11.72 | 0.49  | 7.94  | 65.47 |      | 0.69  | 0.68  | 1.33 | 0.58 | 4.28 |     |      |    |      |       |     |      |     |     |      |     | 6.82 | 100 | 99    |              |
| S24    | 6    | 6        | Grt                    | 41.03 |       | 21.37 | 23.11 | 0.35 | 8.92  | 5.22  |      |      |      |     |      |    |      |       |     |      |     |     |      |     |      |     | 100   | 130          |
| S24    | 6    | 7        | Feohy +                | 6.14  |       | 0.95  | 92.21 | 0.70 |       |       |      |      |      |     |      |    |      |       |     |      |     |     |      |     |      |     | 100   | 87           |

Table B12.1: Mineral chemical analyses from sample S24.

| Sample | Site | Position | Mineral    | SiO2  | TiO2  | Al2O3 | FeO   | MnO   | MgO   | CaO   | Na2O | K2O  | P2O5  | SO3  | F     | Cl | V2O5 | Cr2O3 | CoO  | NiO  | CuO  | ZnO | ZrO2  | BaO  | HfO2 | WO3  | Total | Actual Total |
|--------|------|----------|------------|-------|-------|-------|-------|-------|-------|-------|------|------|-------|------|-------|----|------|-------|------|------|------|-----|-------|------|------|------|-------|--------------|
| S24    | 6    | 8        | Zrn        | 30.83 |       |       | 0.57  |       |       |       |      |      |       |      |       |    |      |       |      |      |      |     | 68.60 |      |      |      | 100   | 130          |
| S24    | 6    | 9        | Chr        |       | 0.89  | 25.84 | 24.26 |       | 10.25 |       |      |      |       |      |       |    | 0.45 | 38.31 |      |      |      |     |       |      |      |      | 100   | 115          |
| S24    | 6    | 10       | Feohy +    | 3.34  |       | 1.14  | 95.15 |       |       |       |      |      |       |      |       |    |      | 0.37  |      |      |      |     |       |      |      |      | 100   | 93           |
| S24    | 6    | 11       | Qz + Feohy | 72.49 |       |       | 27.51 |       |       |       |      |      |       |      |       |    |      |       |      |      |      |     |       |      |      |      | 100   | 109          |
| S24    | 6    | 12       | Qz         | 99.64 |       |       | 0.36  |       |       |       |      |      |       |      |       |    |      |       |      |      |      |     |       |      |      |      | 100   | 126          |
| S24    | 6    | 13       | Feohy +    | 4.29  |       | 2.12  | 90.21 | 1.32  |       | 0.49  |      |      | 1.57  |      |       |    |      |       |      |      |      |     |       |      |      |      | 100   | 87           |
| S24    | 6    | 14       | Feohy +    | 7.41  |       | 6.09  | 83.23 |       |       | 0.56  |      |      | 2.71  |      |       |    |      |       |      |      |      |     |       |      |      |      | 100   | 77           |
| S24    | 6    | 15       | TiO2 + Qz  | 29.41 | 61.38 | 2.67  | 5.03  |       |       | 0.35  |      |      | 1.15  |      |       |    |      |       |      |      |      |     |       |      |      |      | 100   | 103          |
| S24    | 6    | 16       | Chr        |       |       | 20.98 | 16.17 |       | 12.13 |       |      |      |       |      |       |    |      | 50.72 |      |      |      |     |       |      |      |      | 100   | 104          |
| S24    | 6    | 17       | Feohy +    | 2.63  |       | 1.03  | 94.44 | 0.66  |       |       |      |      | 1.24  |      |       |    |      |       |      |      |      |     |       |      |      |      | 100   | 84           |
| S24    | 6    | 18       | Ep         | 39.90 | 0.39  | 23.17 | 11.15 |       |       | 22.40 |      |      |       |      |       |    |      |       |      |      |      |     |       |      |      |      | 97    | 104          |
| S24    | 6    | 19       | Spl        |       |       | 31.22 | 18.55 |       | 12.41 |       |      |      |       |      |       |    |      | 37.82 |      |      |      |     |       |      |      |      | 100   | 109          |
| S24    | 6    | 20       | Feohy +    | 2.96  |       | 0.98  | 95.44 |       | 0.62  |       |      |      |       |      |       |    |      |       |      |      |      |     |       |      |      |      | 100   | 89           |
| S24    | 6    | 21       | Mix        | 7.43  |       | 29.79 | 5.09  | 44.20 | 2.27  | 0.60  |      |      |       |      | 3.04  |    |      |       | 0.74 | 4.36 | 1.03 |     |       | 1.45 |      |      | 100   | 86           |
| S24    | 6    | 22       | Feohy +    | 3.81  |       | 1.69  | 92.50 | 0.67  |       | 0.33  |      |      | 1.01  |      |       |    |      |       |      |      |      |     |       |      |      |      | 100   | 88           |
| S24    | 6    | 23       | Feohy +    | 19.93 |       | 10.66 | 63.84 |       | 1.79  | 0.84  |      | 1.43 | 1.51  |      |       |    |      |       |      |      |      |     |       |      |      |      | 100   | 88           |
| S24    | 6    | 24       | Feohy +    | 3.80  |       | 1.97  | 92.87 |       |       | 0.45  |      |      | 0.92  |      |       |    |      |       |      |      |      |     |       |      |      |      | 100   | 87           |
| S24    | 6    | 25       | Chr        |       |       | 16.68 | 21.89 |       | 10.28 |       |      |      |       |      |       |    | 0.45 | 50.70 |      |      |      |     |       |      |      |      | 100   | 115          |
| S24    | 6    | 26       | Ill +      | 48.81 | 1.23  | 24.90 | 12.48 | 3.27  | 1.42  | 0.42  | 1.38 | 3.19 |       |      |       |    |      |       |      |      |      |     |       |      | 2.89 |      | 100   | 76           |
| S24    | 6    | 27       | Feohy +    | 6.63  |       | 3.94  | 87.12 |       |       | 0.45  |      |      | 1.86  |      |       |    |      |       |      |      |      |     |       |      |      |      | 100   | 76           |
| S24    | 7    | 1        | Zrn        | 30.82 |       |       | 0.60  |       |       | 0.35  |      |      |       |      |       |    |      |       |      |      |      |     | 66.34 |      | 1.89 |      | 100   | 122          |
| S24    | 7    | 2        | Mix        | 25.64 | 0.65  | 18.60 | 45.62 |       | 0.62  | 0.68  | 0.57 | 0.85 | 2.82  |      |       |    |      | 0.80  |      |      |      |     |       |      |      | 3.15 | 100   | 97           |
| S24    | 7    | 3        | Feohy +    | 5.64  |       | 1.53  | 91.89 |       |       |       |      |      | 0.95  |      |       |    |      |       |      |      |      |     |       |      |      |      | 100   | 82           |
| S24    | 7    | 4        | Ap         |       |       |       | 0.65  |       |       | 45.51 | 1.13 |      | 38.99 | 1.60 | 9.01  |    |      |       |      |      |      |     |       |      |      | 3.11 | 100   | 89           |
| S24    | 7    | 5        | Feohy +    | 2.94  |       | 1.64  | 92.88 | 0.46  |       | 0.56  |      |      | 0.99  |      |       |    |      | 0.53  |      |      |      |     |       |      |      |      | 100   | 95           |
| S24    | 7    | 6        | Feohy +    | 5.03  |       | 1.64  | 92.85 |       |       | 0.48  |      |      |       |      |       |    |      |       |      |      |      |     |       |      |      |      | 100   | 85           |
| S24    | 7    | 7        | Feohy +    | 6.68  |       | 2.00  | 88.83 |       | 0.77  | 0.50  |      |      | 1.21  |      |       |    |      |       |      |      |      |     |       |      |      |      | 100   | 91           |
| S24    | 7    | 8        | Zrn        | 31.29 |       |       |       |       |       |       |      |      |       |      |       |    |      |       |      |      |      |     | 68.71 |      |      |      | 100   | 125          |
| S24    | 7    | 9        | Ep         | 39.66 |       | 22.57 | 12.08 | 0.34  |       | 22.36 |      |      |       |      |       |    |      |       |      |      |      |     |       |      |      |      | 97    | 113          |
| S24    | 7    | 10       | Grt        | 39.01 |       | 20.27 | 2.14  | 22.87 |       | 13.16 |      |      |       |      | 2.55  |    |      |       |      |      |      |     |       |      |      |      | 100   | 122          |
| S24    | 7    | 11       | Feohy +    | 4.25  |       |       | 95.75 |       |       |       |      |      |       |      |       |    |      |       |      |      |      |     |       |      |      |      | 100   | 82           |
| S24    | 7    | 12       | Feohy +    | 9.46  |       | 2.31  | 80.58 |       |       | 0.39  |      |      | 2.45  |      |       |    |      | 0.65  |      |      |      |     |       |      |      | 4.16 | 100   | 89           |
| S24    | 7    | 13       | Zrn        | 30.94 |       |       | 0.45  |       |       |       |      |      |       |      |       |    |      |       |      |      |      |     | 68.61 |      |      |      | 100   | 123          |
| S24    | 7    | 14       | Ilm        | 0.68  | 50.60 | 0.60  | 43.89 | 1.28  | 2.96  |       |      |      |       |      |       |    |      |       |      |      |      |     |       |      |      |      | 100   | 104          |
| S24    | 7    | 15       | Qz         | 97.13 |       | 1.88  | 0.82  |       |       |       |      | 0.18 |       |      |       |    |      |       |      |      |      |     |       |      |      |      | 100   | 114          |
| S24    | 7    | 16       | Feohy +    | 4.71  |       | 2.46  | 89.47 |       |       |       | 0.81 |      | 1.99  |      |       |    |      | 0.58  |      |      |      |     |       |      |      |      | 100   | 83           |
| S24    | 7    | 17       | Feohy +    | 13.15 |       | 7.90  | 73.97 | 2.24  |       | 0.57  |      | 0.80 | 1.37  |      |       |    |      |       |      |      |      |     |       |      |      |      | 100   | 63           |
| S24    | 7    | 18       | Zrn        | 31.15 |       |       |       |       |       |       |      |      |       |      |       |    |      |       |      |      |      |     | 67.29 |      | 1.57 |      | 100   | 115          |
| S24    | 7    | 19       | Feohy +    | 6.87  |       | 2.68  | 88.29 |       |       | 0.49  |      |      | 1.67  |      |       |    |      |       |      |      |      |     |       |      |      |      | 100   | 77           |
| S24    | 7    | 20       | Ap +       | 1.32  |       | 1.04  | 0.81  |       |       | 42.54 | 0.77 |      | 37.53 | 1.25 | 12.02 |    |      |       |      |      |      |     |       |      |      | 2.72 | 100   | 84           |
| S24    | 7    | 21       | Feohy +    | 5.34  |       | 2.52  | 89.12 |       |       | 0.49  |      |      | 1.96  |      |       |    |      | 0.58  |      |      |      |     |       |      |      |      | 100   | 83           |
| S24    | 7    | 22       | Ap         |       |       |       | 0.79  |       |       | 48.21 |      |      | 40.91 |      | 7.70  |    |      |       |      |      |      |     |       |      |      | 2.38 | 100   | 76           |
| S24    | 7    | 23       | Chr        |       |       | 19.34 | 24.13 |       | 10.10 |       |      |      |       |      |       |    |      | 46.43 |      |      |      |     |       |      |      |      | 100   | 108          |
| S24    | 7    | 24       | Feohy +    | 3.40  |       | 1.48  | 93.06 | 0.57  |       | 0.48  |      |      | 1.00  |      |       |    |      |       |      |      |      |     |       |      |      |      | 100   | 87           |
| S24    | 7    | 25       | Feohy +    | 4.32  |       | 4.99  | 85.50 |       |       |       |      |      | 2.04  |      |       |    |      |       |      |      |      |     |       |      |      | 3.15 | 100   | 75           |
| S24    | 7    | 26       | Chr        |       | 0.50  | 12.27 | 27.28 |       | 8.56  |       |      |      |       |      |       |    |      | 51.40 |      |      |      |     |       |      |      |      | 100   | 110          |

Table B12.1: Mineral chemical analyses from sample S24.

| Sample | Site | Position | Mineral | SiO2  | TiO2  | Al2O3 | FeO   | MnO   | MgO   | CaO   | Na2O | K2O   | P2O5 | SO3 | F     | Cl | V2O5 | Cr2O3 | CoO  | NiO  | CuO  | ZnO  | ZrO2  | BaO | HfO2 | WO3  | Total | Actual Total |
|--------|------|----------|---------|-------|-------|-------|-------|-------|-------|-------|------|-------|------|-----|-------|----|------|-------|------|------|------|------|-------|-----|------|------|-------|--------------|
| S24    | 7.1  | 1        | Qz      | 99.00 |       |       | 1.00  |       |       |       |      |       |      |     |       |    |      |       |      |      |      |      |       |     |      |      | 100   | 124          |
| S24    | 7.1  | 2        | Mix     | 14.52 | 0.70  | 14.09 | 62.21 | 0.96  | 0.86  |       |      |       | 3.02 |     |       |    |      |       |      |      |      |      |       |     |      | 3.65 | 100   | 90           |
| S24    | 7.1  | 3        | Kfs     | 64.81 |       | 17.33 | 2.40  |       |       |       |      | 15.46 |      |     |       |    |      |       |      |      |      |      |       |     |      |      | 100   | 113          |
| S24    | 7.1  | 4        | Mix     | 42.79 | 0.62  | 8.02  | 42.97 | 0.52  | 0.55  |       |      |       | 1.74 |     |       |    |      |       |      |      |      |      |       |     |      |      | 100   | 92           |
| S24    | 7.1  | 5        | Qz      | 99.08 |       |       | 0.92  |       |       |       |      |       |      |     |       |    |      |       |      |      |      |      |       |     |      |      | 100   | 119          |
| S24    | 8    | 1        | Chr     |       |       | 24.23 | 15.00 |       | 14.25 |       |      |       |      |     |       |    |      | 46.52 |      |      |      |      |       |     |      |      | 100   | 109          |
| S24    | 8    | 2        | Feohy + | 13.46 | 0.58  | 6.97  | 75.59 |       |       | 0.44  | 0.87 | 0.80  | 1.29 |     |       |    |      |       |      |      |      |      |       |     |      |      | 100   | 89           |
| S24    | 8    | 3        | Feohy + | 8.56  |       | 1.40  | 88.36 |       |       | 0.38  |      |       | 1.30 |     |       |    |      |       |      |      |      |      |       |     |      |      | 100   | 85           |
| S24    | 8    | 4        | Qz      | 98.82 |       | 0.77  | 0.41  |       |       |       |      |       |      |     |       |    |      |       |      |      |      |      |       |     |      |      | 100   | 118          |
| S24    | 8    | 5        | Feohy + | 8.99  |       | 7.01  | 80.80 |       |       |       |      |       | 1.34 |     |       |    | 0.57 |       |      |      |      | 1.29 |       |     |      |      | 100   | 75           |
| S24    | 8    | 6        | Feohy + |       | 13.58 | 6.38  | 77.96 | 0.67  | 1.41  |       |      |       |      |     |       |    |      |       |      |      |      |      |       |     |      |      | 100   | 99           |
| S24    | 8    | 7        | Feohy + | 4.83  |       |       | 94.43 |       | 0.74  |       |      |       |      |     |       |    |      |       |      |      |      |      |       |     |      |      | 100   | 78           |
| S24    | 8    | 8        | Ep      | 39.53 |       | 19.80 | 12.29 | 4.92  |       | 20.46 |      |       |      |     |       |    |      |       |      |      |      |      |       |     |      |      | 97    | 114          |
| S24    | 8    | 9        | Feohy + | 5.02  |       | 2.76  | 89.55 |       |       | 0.49  |      |       | 1.05 |     |       |    |      |       |      |      | 1.13 |      |       |     |      |      | 100   | 78           |
| S24    | 8    | 10       | Mix     | 30.45 | 0.49  | 20.46 | 18.73 |       | 1.36  | 0.42  | 4.45 | 2.33  | 0.81 |     | 19.96 |    | 0.54 |       |      |      |      |      |       |     |      |      | 100   | 133          |
| S24    | 8    | 11       | Feohy + | 4.45  |       | 1.72  | 92.05 |       |       | 0.52  |      |       | 1.27 |     |       |    |      |       |      |      |      |      |       |     |      |      | 100   | 81           |
| S24    | 8    | 12       | Feohy + | 2.47  |       | 1.16  | 96.37 |       |       |       |      |       |      |     |       |    |      |       |      |      |      |      |       |     |      |      | 100   | 81           |
| S24    | 8    | 13       | Feohy + | 3.99  |       |       | 95.45 |       |       | 0.57  |      |       |      |     |       |    |      |       |      |      |      |      |       |     |      |      | 100   | 73           |
| S24    | 8    | 14       | Grt     | 40.24 |       | 22.16 | 26.56 | 0.68  | 4.86  | 5.50  |      |       |      |     |       |    |      |       |      |      |      |      |       |     |      |      | 100   | 108          |
| S24    | 8    | 15       | Feohy + | 3.64  |       |       | 91.71 |       |       | 0.51  |      |       | 1.57 |     |       |    |      |       |      |      |      |      |       |     |      | 2.57 | 100   | 82           |
| S24    | 8    | 16       | Feohy + | 2.14  |       |       | 97.86 |       |       |       |      |       |      |     |       |    |      |       |      |      |      |      |       |     |      |      | 100   | 76           |
| S24    | 8    | 17       | Zrn     | 31.06 |       |       | 0.42  |       |       |       |      |       |      |     |       |    |      |       |      |      |      |      | 68.52 |     |      |      | 100   | 118          |
| S24    | 8    | 18       | Spl     |       |       | 37.93 | 16.00 |       | 13.64 |       |      |       |      |     |       |    |      | 32.44 |      |      |      |      |       |     |      |      | 100   | 107          |
| S24    | 8    | 19       | Spl     |       |       | 36.41 | 16.98 |       | 13.77 |       |      |       |      |     |       |    |      | 32.84 |      |      |      |      |       |     |      |      | 100   | 110          |
| S24    | 8    | 20       | Feohy + | 4.21  |       | 2.44  | 92.04 |       |       |       |      |       | 1.31 |     |       |    |      |       |      |      |      |      |       |     |      |      | 100   | 91           |
| S24    | 8    | 21       | Feohy + | 6.97  |       | 0.90  | 88.79 |       |       |       |      |       | 0.95 |     |       |    | 0.55 |       |      |      |      | 1.85 |       |     |      |      | 100   | 84           |
| S24    | 8    | 22       | Grt     | 39.29 |       | 20.90 | 25.56 | 4.27  | 1.12  | 8.85  |      |       |      |     |       |    |      |       |      |      |      |      |       |     |      |      | 100   | 118          |
| S24    | 8    | 23       | Chr     |       |       | 28.70 | 20.91 |       | 12.92 |       |      |       |      |     |       |    |      | 37.46 |      |      |      |      |       |     |      |      | 100   | 112          |
| S24    | 8    | 24       | Zrn     | 31.16 |       |       | 0.44  |       |       |       |      |       |      |     |       |    |      |       |      |      |      |      | 68.40 |     |      |      | 100   | 131          |
| S24    | 8    | 25       | Feohy + | 4.79  |       | 0.80  | 92.81 |       |       | 0.65  |      |       | 0.94 |     |       |    |      |       |      |      |      |      |       |     |      |      | 100   | 90           |
| S24    | 8    | 26       | Feohy + | 3.38  |       | 2.52  | 88.14 |       |       | 0.44  |      |       | 2.21 |     |       |    |      | 0.43  |      |      |      |      |       |     |      | 2.88 | 100   | 89           |
| S24    | 8    | 27       | Chr     |       |       | 17.35 | 18.11 |       | 10.80 |       |      |       |      |     |       |    |      | 53.74 |      |      |      |      |       |     |      |      | 100   | 116          |
| S24    | 8    | 28       | Feohy + | 11.11 | 0.76  | 5.67  | 71.68 |       | 0.88  | 0.41  |      | 0.42  | 2.37 |     |       |    |      | 1.35  |      |      |      |      |       |     |      | 5.35 | 100   | 85           |
| S24    | 9    | 1        | Chr     |       |       | 28.08 | 13.71 |       | 15.94 |       |      |       |      |     |       |    |      | 42.27 |      |      |      |      |       |     |      |      | 100   | 109          |
| S24    | 9    | 2        | Feohy + | 2.38  |       |       | 97.63 |       |       |       |      |       |      |     |       |    |      |       |      |      |      |      |       |     |      |      | 100   | 80           |
| S24    | 9    | 3        | Feohy + | 4.39  |       | 2.02  | 91.57 |       |       | 0.55  |      |       | 1.47 |     |       |    |      |       |      |      |      |      |       |     |      |      | 100   | 87           |
| S24    | 9    | 4        | Feohy + | 3.00  |       |       | 97.00 |       |       |       |      |       |      |     |       |    |      |       |      |      |      |      |       |     |      |      | 100   | 76           |
| S24    | 9    | 5        | Chr     |       |       | 14.91 | 23.11 |       | 8.00  |       |      |       |      |     |       |    |      | 53.97 |      |      |      |      |       |     |      |      | 100   | 100          |
| S24    | 9    | 6        | Feohy + | 7.99  |       | 4.46  | 83.69 |       |       | 0.84  |      |       | 1.71 |     |       |    |      |       |      |      |      | 1.31 |       |     |      |      | 100   | 74           |
| S24    | 9    | 7        | Ep      | 40.23 |       | 23.28 | 11.71 |       |       | 21.79 |      |       |      |     |       |    |      |       |      |      |      |      |       |     |      |      | 97    | 103          |
| S24    | 9    | 8        | Ilm     |       | 52.15 |       | 47.27 | 0.59  |       |       |      |       |      |     |       |    |      |       |      |      |      |      |       |     |      |      | 100   | 99           |
| S24    | 9    | 9        | Feohy + | 3.44  |       | 1.21  | 94.14 |       |       |       |      |       | 1.22 |     |       |    |      |       |      |      |      |      |       |     |      |      | 100   | 77           |
| S24    | 9    | 10       | Mnohy + | 4.13  |       | 29.15 | 3.89  | 40.04 | 1.33  | 0.54  | 1.77 |       |      |     | 10.40 |    |      | 0.70  | 5.86 | 1.49 | 0.70 |      |       |     |      |      | 100   | 89           |
| S24    | 9    | 11       | Zrn     | 31.06 |       |       | 0.41  |       |       |       |      |       |      |     |       |    |      |       |      |      |      |      | 68.54 |     |      |      | 100   | 113          |
| S24    | 9    | 12       | Feohy + | 17.09 |       | 9.21  | 70.05 |       | 1.35  |       |      | 0.42  | 1.88 |     |       |    |      |       |      |      |      |      |       |     |      |      | 100   | 78           |
| S24    | 9    | 13       | Grt     | 39.67 |       | 21.11 | 28.36 | 1.44  | 4.69  | 4.73  |      |       |      |     |       |    |      |       |      |      |      |      |       |     |      |      | 100   | 113          |

Table B12.1: Mineral chemical analyses from sample S24.

| Sample | Site | Position | Mineral | SiO2   | TiO2  | Al2O3 | FeO   | MnO   | MgO   | CaO   | Na2O | K2O  | P2O5  | SO3 | F    | Cl   | V2O5 | Cr2O3 | CoO  | NiO  | CuO  | ZnO  | ZrO2 | BaO | HfO2 | WO3 | Total | Actual Total |
|--------|------|----------|---------|--------|-------|-------|-------|-------|-------|-------|------|------|-------|-----|------|------|------|-------|------|------|------|------|------|-----|------|-----|-------|--------------|
| S24    | 9    | 14       | Chr     |        |       | 13.31 | 19.68 |       | 11.17 |       |      |      |       |     |      |      |      | 55.84 |      |      |      |      |      |     |      |     | 100   | 108          |
| S24    | 9    | 15       | Ep      | 40.18  |       | 23.27 | 11.84 |       |       | 21.71 |      |      |       |     |      |      |      |       |      |      |      |      |      |     |      |     | 97    | 108          |
| S24    | 9    | 16       | Feohy + | 10.08  |       | 6.46  | 79.46 |       | 1.18  | 0.45  |      | 0.44 | 1.93  |     |      |      |      |       |      |      |      |      |      |     |      |     | 100   | 77           |
| S24    | 9    | 17       | Feohy + | 4.61   |       | 3.65  | 87.53 |       |       | 0.56  |      |      | 1.23  |     |      |      |      |       |      |      |      |      |      |     | 2.43 |     | 100   | 88           |
| S24    | 9    | 18       | Feohy + | 2.92   |       | 1.34  | 91.36 |       |       | 0.47  |      |      | 1.58  |     |      |      |      |       |      |      |      |      |      |     | 2.33 |     | 100   | 89           |
| S24    | 9    | 19       | Ep      | 39.55  |       | 20.65 | 11.10 | 2.50  |       | 23.20 |      |      |       |     |      |      |      |       |      |      |      |      |      |     |      |     | 97    | 120          |
| S24    | 9    | 20       | Feohy + | 3.79   |       | 1.53  | 93.20 |       |       | 0.51  |      |      | 0.98  |     |      |      |      |       |      |      |      |      |      |     |      |     | 100   | 94           |
| S24    | 9    | 21       | Chr     |        |       | 21.62 | 15.23 |       | 11.41 |       |      |      |       |     |      |      |      | 51.73 |      |      |      |      |      |     |      |     | 100   | 111          |
| S24    | 9    | 22       | Feohy + | 2.80   |       | 3.35  | 92.30 |       |       | 0.45  |      |      | 1.10  |     |      |      |      |       |      |      |      |      |      |     |      |     | 100   | 86           |
| S24    | 9    | 23       | Feohy + | 6.69   |       | 8.83  | 75.37 |       |       | 0.47  | 0.99 |      | 2.02  |     |      |      |      | 0.46  |      |      |      |      |      |     | 5.18 |     | 100   | 81           |
| S24    | 9    | 24       | Feohy + | 5.48   |       | 1.04  | 91.96 | 1.20  |       | 0.32  |      |      |       |     |      |      |      |       |      |      |      |      |      |     |      |     | 100   | 90           |
| S24    | 9    | 25       | Feohy + | 5.86   |       | 1.38  | 89.47 |       |       |       |      |      |       |     |      |      |      |       |      | 3.28 |      |      |      |     |      |     | 100   | 80           |
| S24    | 9    | 26       | Feohy + | 14.46  |       | 7.45  | 71.76 |       | 0.78  | 0.67  |      | 0.37 | 2.14  |     |      |      |      |       |      |      | 1.70 | 0.67 |      |     |      |     | 100   | 78           |
| S24    | 9    | 27       | Feohy + | 3.66   |       | 1.26  | 93.94 |       |       |       |      |      | 1.15  |     |      |      |      |       |      |      |      |      |      |     |      |     | 100   | 90           |
| S24    | 9    | 28       | Feohy + | 3.96   |       | 1.66  | 91.68 | 0.99  |       | 0.48  |      |      | 1.23  |     |      |      |      |       |      |      |      |      |      |     |      |     | 100   | 81           |
| S24    | 9.1  | 1        | Qz      | 99.33  |       |       | 0.67  |       |       |       |      |      |       |     |      |      |      |       |      |      |      |      |      |     |      |     | 100   | 117          |
| S24    | 9.1  | 2        | Feohy + | 6.42   | 0.78  | 6.98  | 74.86 |       |       | 1.05  | 0.91 |      | 2.56  |     |      |      |      |       |      |      |      |      |      |     | 6.45 |     | 100   | 73           |
| S24    | 9.1  | 3        | Feohy + | 3.63   |       | 1.34  | 93.05 | 0.63  |       | 0.41  |      |      | 0.95  |     |      |      |      |       |      |      |      |      |      |     |      |     | 100   | 86           |
| S24    | 10   | 1        | Feohy + | 7.20   |       | 6.19  | 83.78 |       |       | 0.67  |      |      | 2.17  |     |      |      |      |       |      |      |      |      |      |     |      |     | 100   | 75           |
| S24    | 10   | 2        | Chr     |        |       | 10.77 | 30.26 |       | 6.83  |       |      |      |       |     |      |      |      | 52.13 |      |      |      |      |      |     |      |     | 100   | 103          |
| S24    | 10   | 3        | Chr     |        |       | 26.99 | 16.03 |       | 13.25 |       |      |      |       |     |      |      | 0.45 | 43.29 |      |      |      |      |      |     |      |     | 100   | 108          |
| S24    | 10   | 4        | Ttn     | 32.23  | 37.06 | 1.74  | 1.06  |       |       | 26.87 |      |      |       |     | 1.03 |      |      |       |      |      |      |      |      |     |      |     | 100   | 114          |
| S24    | 10   | 5        | Mix     | 22.87  | 0.65  | 20.10 | 5.18  | 34.78 | 1.52  | 0.38  | 1.35 | 0.58 |       |     | 8.89 |      |      |       |      | 3.02 | 0.67 |      |      |     |      |     | 100   | 89           |
| S24    | 10   | 6        | Spl     |        |       | 34.27 | 18.12 |       | 12.98 |       |      |      |       |     |      |      |      | 34.63 |      |      |      |      |      |     |      |     | 100   | 113          |
| S24    | 10   | 7        | Feohy + | 3.76   |       |       | 95.40 |       |       |       |      |      | 0.84  |     |      |      |      |       |      |      |      |      |      |     |      |     | 100   | 90           |
| S24    | 10   | 8        | Chr     |        | 0.60  | 28.96 | 26.80 |       | 11.82 |       |      |      |       |     |      |      |      | 31.82 |      |      |      |      |      |     |      |     | 100   | 112          |
| S24    | 10   | 9        | Feohy + | 6.46   |       | 2.39  | 89.51 |       |       | 0.51  |      |      | 1.13  |     |      |      |      |       |      |      |      |      |      |     |      |     | 100   | 83           |
| S24    | 10   | 10       | Feohy + | 4.34   |       | 1.80  | 91.43 | 0.71  |       | 0.48  |      |      |       |     |      |      |      |       |      | 1.24 |      |      |      |     |      |     | 100   | 79           |
| S24    | 10   | 11       | Ap      |        |       |       | 0.42  |       |       | 48.71 | 0.46 |      | 45.56 |     | 2.54 | 0.26 |      |       |      |      |      |      |      |     | 2.06 |     | 100   | 92           |
| S24    | 10   | 12       | Feohy + | 4.45   |       | 1.73  | 93.31 |       |       | 0.51  |      |      |       |     |      |      |      |       |      |      |      |      |      |     |      |     | 100   | 84           |
| S24    | 10   | 13       | Feohy + | 9.44   |       | 4.70  | 84.10 |       |       |       |      | 0.50 | 1.25  |     |      |      |      |       |      |      |      |      |      |     |      |     | 100   | 82           |
| S24    | 10   | 14       | Qz      | 100.00 |       |       |       |       |       |       |      |      |       |     |      |      |      |       |      |      |      |      |      |     |      |     | 100   | 110          |
| S24    | 10   | 15       | Mix     | 36.53  |       | 22.27 | 4.35  | 22.27 | 1.11  | 0.54  | 0.74 | 1.14 |       |     | 6.45 |      |      |       | 1.14 | 3.47 |      |      |      |     |      |     | 100   | 89           |
| S24    | 10   | 16       | Feohy + | 4.98   |       | 1.46  | 91.86 |       |       | 0.49  |      |      | 1.21  |     |      |      |      |       |      |      |      |      |      |     |      |     | 100   | 78           |
| S24    | 10   | 17       | Feohy + | 4.72   |       | 1.56  | 92.31 | 1.42  |       |       |      |      |       |     |      |      |      |       |      |      |      |      |      |     |      |     | 100   | 73           |
| S24    | 10   | 18       | Grt     | 38.68  |       | 20.52 | 29.63 | 3.34  | 1.24  | 6.58  |      |      |       |     |      |      |      |       |      |      |      |      |      |     |      |     | 100   | 104          |
| S24    | 10   | 19       | Mix     | 54.33  | 0.40  | 11.72 | 30.51 |       | 0.92  | 0.44  |      | 0.93 | 0.76  |     |      |      |      |       |      |      |      |      |      |     |      |     | 100   | 96           |
| S24    | 10   | 20       | Feohy + | 7.12   |       | 1.61  | 90.77 |       |       | 0.50  |      |      |       |     |      |      |      |       |      |      |      |      |      |     |      |     | 100   | 79           |
| S24    | 10   | 21       | Qz      | 99.72  |       |       | 0.28  |       |       |       |      |      |       |     |      |      |      |       |      |      |      |      |      |     |      |     | 100   | 116          |
| S24    | 10   | 22       | Feohy + | 5.24   |       | 2.10  | 91.11 |       |       | 0.38  |      |      | 1.16  |     |      |      |      |       |      |      |      |      |      |     |      |     | 100   | 73           |
| S24    | 10   | 23       | Qz +    | 96.34  |       | 2.14  | 1.21  |       |       |       |      | 0.31 |       |     |      |      |      |       |      |      |      |      |      |     |      |     | 100   | 108          |
| S24    | 10   | 24       | Feohy + | 3.85   |       | 2.15  | 91.32 |       |       | 0.53  |      |      | 2.15  |     |      |      |      |       |      |      |      |      |      |     |      |     | 100   | 81           |
| S24    | 10   | 25       | Grt     | 39.60  |       | 21.15 | 32.00 | 1.10  | 2.84  | 3.31  |      |      |       |     |      |      |      |       |      |      |      |      |      |     |      |     | 100   | 109          |
| S24    | 10   | 26       | Feohy + | 6.66   |       | 6.30  | 81.54 |       |       | 0.48  |      |      | 2.60  |     |      |      | 0.58 |       |      |      | 0.88 | 0.96 |      |     |      |     | 100   | 79           |
| S24    | 10   | 27       | Feohy + | 7.17   |       | 4.48  | 82.73 |       |       | 0.61  |      |      | 1.82  |     |      |      |      |       |      |      |      |      |      |     | 3.19 |     | 100   | 81           |
| S24    | 10.1 | 1        | Feohy + | 8.44   |       | 3.98  | 84.69 |       |       | 0.88  |      |      | 2.01  |     |      |      |      |       |      |      |      |      |      |     |      |     | 100   | 75           |



Table B12.1: Mineral chemical analyses from sample S24.

| Sample | Site | Position | Mineral    | SiO2  | TiO2  | Al2O3 | FeO   | MnO  | MgO   | CaO   | Na2O | K2O  | P2O5  | SO3  | F    | Cl | V2O5 | Cr2O3 | CoO  | NiO | CuO | ZnO | ZrO2 | BaO | HfO2 | WO3  | Total | Actual Total |
|--------|------|----------|------------|-------|-------|-------|-------|------|-------|-------|------|------|-------|------|------|----|------|-------|------|-----|-----|-----|------|-----|------|------|-------|--------------|
| S24    | 10.1 | 2        | Feohy +    | 4.99  |       | 2.31  | 90.74 |      |       | 0.58  |      |      | 1.39  |      |      |    |      |       |      |     |     |     |      |     |      |      | 100   | 79           |
| S24    | 10.1 | 3        | Feohy +    | 7.83  |       | 5.03  | 84.43 |      |       | 0.64  |      |      | 2.07  |      |      |    |      |       |      |     |     |     |      |     |      |      | 100   | 76           |
| S24    | 11   | 1        | Feohy +    | 4.12  |       | 0.77  | 94.63 |      |       | 0.49  |      |      |       |      |      |    |      |       |      |     |     |     |      |     |      |      | 100   | 78           |
| S24    | 11   | 2        | Grt        | 39.41 |       | 20.83 | 24.98 | 9.52 | 3.39  | 1.86  |      |      |       |      |      |    |      |       |      |     |     |     |      |     |      |      | 100   | 119          |
| S24    | 11   | 3        | Feohy +    | 5.56  |       | 2.23  | 88.68 | 0.87 | 0.66  |       |      |      | 1.39  |      |      |    |      |       | 0.61 |     |     |     |      |     |      |      | 100   | 85           |
| S24    | 11   | 4        | Qz + Feohy | 50.92 |       | 1.02  | 48.06 |      |       |       |      |      |       |      |      |    |      |       |      |     |     |     |      |     |      |      | 100   | 106          |
| S24    | 11   | 5        | Chr        |       |       | 27.36 | 17.80 |      | 11.52 |       |      |      |       |      |      |    |      | 43.31 |      |     |     |     |      |     |      |      | 100   | 115          |
| S24    | 11   | 6        | Feohy +    | 3.98  |       |       | 94.00 | 1.10 |       | 0.34  |      |      |       |      |      |    |      | 0.58  |      |     |     |     |      |     |      |      | 100   | 94           |
| S24    | 11   | 7        | Mix        | 29.66 |       | 12.46 | 52.20 |      | 2.27  |       |      | 2.29 | 1.13  |      |      |    |      |       |      |     |     |     |      |     |      |      | 100   | 96           |
| S24    | 11   | 8        | Feohy +    | 6.36  |       | 2.84  | 89.03 |      |       | 0.52  |      |      | 1.26  |      |      |    |      |       |      |     |     |     |      |     |      |      | 100   | 81           |
| S24    | 11   | 9        | Feohy +    | 3.40  |       | 1.55  | 93.25 |      |       | 0.45  |      |      | 1.35  |      |      |    |      |       |      |     |     |     |      |     |      |      | 100   | 93           |
| S24    | 11   | 10       | Feohy +    | 2.51  |       | 2.02  | 95.10 |      |       | 0.37  |      |      |       |      |      |    |      |       |      |     |     |     |      |     |      |      | 100   | 97           |
| S24    | 11   | 11       | Feohy +    | 2.87  |       | 1.92  | 94.03 | 0.69 |       | 0.49  |      |      |       |      |      |    |      |       |      |     |     |     |      |     |      |      | 100   | 92           |
| S24    | 11   | 12       | Feohy +    | 2.59  |       | 1.21  | 96.20 |      |       |       |      |      |       |      |      |    |      |       |      |     |     |     |      |     |      |      | 100   | 91           |
| S24    | 11   | 13       | Spl        |       |       | 35.55 | 14.23 |      | 16.77 |       |      |      |       |      |      |    |      | 33.44 |      |     |     |     |      |     |      |      | 100   | 115          |
| S24    | 11   | 14       | Spl        |       |       | 31.34 | 20.47 |      | 13.36 |       |      |      |       |      |      |    |      | 34.83 |      |     |     |     |      |     |      |      | 100   | 113          |
| S24    | 11   | 15       | Ep         | 40.39 |       | 24.27 | 9.66  |      |       | 22.68 |      |      |       |      |      |    |      |       |      |     |     |     |      |     |      |      | 97    | 110          |
| S24    | 11   | 16       | Chr        |       | 0.40  | 24.03 | 23.96 |      | 10.32 |       |      |      |       |      |      |    |      | 41.29 |      |     |     |     |      |     |      |      | 100   | 108          |
| S24    | 11   | 17       | Feohy +    | 9.20  |       | 6.02  | 81.88 |      |       | 0.64  |      |      | 2.26  |      |      |    |      |       |      |     |     |     |      |     |      |      | 100   | 78           |
| S24    | 11   | 18       | Feohy +    | 1.96  |       | 1.07  | 93.95 |      |       | 0.58  |      |      | 1.14  |      |      |    |      |       |      |     |     |     |      |     | 1.29 |      | 100   | 72           |
| S24    | 11   | 19       | TiO2 + Qz  | 15.04 | 83.85 | 0.61  | 0.50  |      |       |       |      |      |       |      |      |    |      |       |      |     |     |     |      |     |      |      | 100   | 108          |
| S24    | 11   | 20       | Mix        | 43.43 | 3.50  | 14.09 | 9.08  |      | 14.90 | 11.39 | 2.80 | 0.82 |       |      |      |    |      |       |      |     |     |     |      |     |      |      | 100   | 107          |
| S24    | 11   | 21       | Feohy +    | 4.72  |       | 2.03  | 88.40 |      |       | 0.41  |      |      | 1.78  |      |      |    |      |       |      |     |     |     |      |     | 2.67 |      | 100   | 85           |
| S24    | 11   | 22       | Feohy +    | 3.95  |       | 2.23  | 91.57 |      |       | 0.53  |      |      | 1.72  |      |      |    |      |       |      |     |     |     |      |     |      |      | 100   | 86           |
| S24    | 11   | 23       | Feohy +    | 3.62  |       | 1.18  | 94.17 |      |       |       |      |      | 1.03  |      |      |    |      |       |      |     |     |     |      |     |      |      | 100   | 85           |
| S24    | 11.1 | 1        | Feohy +    | 6.98  |       | 1.30  | 91.72 |      |       |       |      |      |       |      |      |    |      |       |      |     |     |     |      |     |      |      | 100   | 80           |
| S24    | 11.1 | 2        | Qz         | 99.46 |       |       | 0.54  |      |       |       |      |      |       |      |      |    |      |       |      |     |     |     |      |     |      |      | 100   | 127          |
| S24    | 11.1 | 3        | Chl +      | 43.58 | 0.74  | 22.04 | 11.74 | 5.42 | 11.09 | 0.37  | 0.74 | 1.44 |       |      |      |    |      |       |      |     |     |     |      |     | 2.84 |      | 100   | 91           |
| S24    | 12   | 1        | Feohy +    | 4.10  |       | 2.17  | 90.48 | 1.11 |       | 0.38  |      |      | 1.76  |      |      |    |      |       |      |     |     |     |      |     |      |      | 100   | 89           |
| S24    | 12   | 2        | Feohy +    | 4.09  |       | 2.53  | 89.89 | 0.76 |       | 0.37  |      |      | 1.86  |      |      |    |      | 0.51  |      |     |     |     |      |     |      |      | 100   | 93           |
| S24    | 12   | 3        | Feohy +    | 7.87  |       | 1.88  | 88.86 |      |       | 0.52  |      |      | 0.86  |      |      |    |      |       |      |     |     |     |      |     |      |      | 100   | 82           |
| S24    | 12   | 4        | Ep         | 40.26 |       | 23.59 | 11.20 |      |       | 21.94 |      |      |       |      |      |    |      |       |      |     |     |     |      |     |      |      | 97    | 112          |
| S24    | 12   | 5        | Spl        |       |       | 32.32 | 15.74 |      | 13.59 |       |      |      |       |      |      |    |      | 38.35 |      |     |     |     |      |     |      |      | 100   | 109          |
| S24    | 12   | 6        | Feohy +    | 5.67  |       | 2.45  | 90.04 |      | 0.72  |       |      |      | 1.12  |      |      |    |      |       |      |     |     |     |      |     |      |      | 100   | 76           |
| S24    | 12   | 7        | Feohy +    | 4.15  |       | 1.15  | 94.29 |      |       | 0.41  |      |      |       |      |      |    |      |       |      |     |     |     |      |     |      |      | 100   | 87           |
| S24    | 12   | 8        | Chr        |       |       | 28.53 | 19.90 |      | 12.74 |       |      |      |       |      |      |    |      | 38.82 |      |     |     |     |      |     |      |      | 100   | 107          |
| S24    | 12   | 9        | Feohy +    | 12.37 |       | 11.91 | 68.88 |      |       | 0.54  | 0.67 | 0.38 | 5.26  |      |      |    |      |       |      |     |     |     |      |     |      |      | 100   | 80           |
| S24    | 12   | 10       | Ep +       | 49.23 |       | 18.12 | 13.38 |      |       | 19.26 |      |      |       |      |      |    |      |       |      |     |     |     |      |     |      |      | 100   | 107          |
| S24    | 12   | 11       | Feohy +    | 3.24  |       | 3.44  | 87.33 |      |       | 0.53  | 0.79 |      | 2.29  |      |      |    |      |       |      |     |     |     |      |     | 2.38 |      | 100   | 85           |
| S24    | 12   | 12       | Feohy +    | 13.30 | 0.89  | 5.06  | 75.85 |      | 0.82  |       |      | 1.03 | 0.78  |      |      |    |      |       |      |     |     |     |      |     | 2.27 |      | 100   | 71           |
| S24    | 12   | 13       | Feohy +    | 3.70  |       | 1.09  | 94.80 |      |       | 0.41  |      |      |       |      |      |    |      |       |      |     |     |     |      |     |      |      | 100   | 84           |
| S24    | 12   | 14       | Feohy +    | 4.27  |       | 1.52  | 92.03 |      |       | 0.48  |      |      | 1.70  |      |      |    |      |       |      |     |     |     |      |     |      |      | 100   | 87           |
| S24    | 12   | 15       | Tur        | 37.43 | 0.35  | 27.49 | 11.84 |      | 6.64  | 0.99  | 2.26 |      |       |      |      |    |      |       |      |     |     |     |      |     |      |      | 87    | 101          |
| S24    | 12   | 16       | Feohy +    | 6.76  |       | 5.63  | 84.31 |      | 0.77  | 0.61  |      |      | 1.92  |      |      |    |      |       |      |     |     |     |      |     |      |      | 100   | 79           |
| S24    | 12   | 17       | Chr        |       |       | 12.02 | 22.85 |      | 8.89  |       |      |      |       |      |      |    |      | 56.24 |      |     |     |     |      |     |      |      | 100   | 103          |
| S24    | 12   | 18       | Ap         |       |       |       | 0.52  |      |       | 45.71 | 0.91 |      | 39.79 | 1.32 | 9.30 |    |      |       |      |     |     |     |      |     |      | 2.45 | 100   | 106          |

Table B12.1: Mineral chemical analyses from sample S24.

| Sample | Site | Position | Mineral   | SiO2  | TiO2  | Al2O3 | FeO   | MnO  | MgO   | CaO   | Na2O | K2O  | P2O5  | SO3 | F    | Cl | V2O5 | Cr2O3 | CoO | NiO | CuO  | ZnO  | ZrO2 | BaO | HfO2 | WO3  | Total | Actual Total |
|--------|------|----------|-----------|-------|-------|-------|-------|------|-------|-------|------|------|-------|-----|------|----|------|-------|-----|-----|------|------|------|-----|------|------|-------|--------------|
| S24    | 12   | 19       | Feohy +   | 4.05  |       | 1.06  | 92.56 | 0.99 |       | 0.42  |      |      | 0.93  |     |      |    |      |       |     |     |      |      |      |     |      |      | 100   | 84           |
| S24    | 12   | 20       | Feohy +   | 4.42  |       | 1.58  | 94.00 |      |       |       |      |      |       |     |      |    |      |       |     |     |      |      |      |     |      |      | 100   | 90           |
| S24    | 12   | 21       | Feohy +   | 3.24  |       | 0.98  | 95.78 |      |       |       |      |      |       |     |      |    |      |       |     |     |      |      |      |     |      |      | 100   | 91           |
| S24    | 12   | 22       | Feohy +   | 2.67  |       | 1.72  | 92.61 | 0.56 |       | 0.49  |      |      | 1.50  |     |      |    | 0.46 |       |     |     |      |      |      |     |      |      | 100   | 94           |
| S24    | 12   | 23       | Chr       |       |       | 9.72  | 23.82 |      | 8.78  |       |      |      |       |     |      |    |      | 57.68 |     |     |      |      |      |     |      |      | 100   | 117          |
| S24    | 12   | 24       | Feohy +   | 8.57  |       | 3.13  | 86.19 |      |       | 0.64  |      |      | 1.47  |     |      |    |      |       |     |     |      |      |      |     |      |      | 100   | 86           |
| S24    | 12   | 25       | Cpx       | 53.25 | 0.70  | 3.85  | 4.36  |      | 16.15 | 21.26 | 0.43 |      |       |     |      |    |      |       |     |     |      |      |      |     |      |      | 100   | 115          |
| S24    | 12   | 26       | Kfs + Chl | 62.55 | 0.99  | 20.09 | 8.87  | 1.32 | 1.89  | 0.58  | 0.76 | 2.95 |       |     |      |    |      |       |     |     |      |      |      |     |      |      | 100   | 86           |
| S24    | 12   | 27       | TiO2      |       | 99.29 |       | 0.71  |      |       |       |      |      |       |     |      |    |      |       |     |     |      |      |      |     |      |      | 100   | 108          |
| S24    | 12.1 | 1        | Feohy +   | 4.82  |       | 1.51  | 93.28 |      |       | 0.40  |      |      |       |     |      |    |      |       |     |     |      |      |      |     |      |      | 100   | 85           |
| S24    | 12.1 | 2        | Feohy +   | 12.64 |       | 5.03  | 75.85 |      |       | 0.57  | 0.84 |      | 2.02  |     |      |    |      |       |     |     |      |      |      |     | 3.05 |      | 100   | 84           |
| S24    | 12.1 | 3        | Chl + Ms  | 43.57 | 0.54  | 16.20 | 28.78 |      | 3.31  |       | 0.92 | 3.86 |       |     |      |    |      |       |     |     |      |      |      |     | 2.81 |      | 100   | 92           |
| S24    | 12.1 | 4        | Feohy +   | 4.56  |       | 1.42  | 94.02 |      |       |       |      |      |       |     |      |    |      |       |     |     |      |      |      |     |      |      | 100   | 82           |
| S24    | 13   | 1        | Chr +     | 14.73 |       | 23.21 | 19.20 |      | 11.09 |       | 0.97 |      |       |     |      |    |      | 30.15 |     |     |      | 0.64 |      |     |      |      | 100   | 96           |
| S24    | 13   | 2        | Feohy +   | 4.73  |       | 4.36  | 83.91 |      |       | 0.42  |      |      | 2.69  |     |      |    |      |       |     |     |      |      |      |     |      | 3.88 | 100   | 84           |
| S24    | 13   | 3        | Feohy +   | 6.65  |       | 4.34  | 85.53 |      |       | 0.61  |      |      | 2.08  |     |      |    |      |       |     |     |      | 0.77 |      |     |      |      | 100   | 80           |
| S24    | 13   | 4        | Feohy +   | 5.69  |       | 2.97  | 89.80 |      |       | 0.37  |      |      | 1.16  |     |      |    |      |       |     |     |      |      |      |     |      |      | 100   | 83           |
| S24    | 13   | 5        | Feohy +   | 4.81  |       | 4.04  | 86.96 |      |       |       |      |      | 1.18  |     |      |    |      |       |     |     |      |      |      |     |      | 3.01 | 100   | 76           |
| S24    | 13   | 6        | Feohy +   | 3.80  |       | 2.43  | 87.63 |      |       | 0.45  |      |      | 2.20  |     |      |    |      |       |     |     |      |      |      |     |      | 3.50 | 100   | 92           |
| S24    | 13   | 7        | Feohy +   | 3.30  |       | 4.31  | 88.09 |      | 1.18  | 0.74  |      |      | 2.38  |     |      |    |      |       |     |     |      |      |      |     |      |      | 100   | 84           |
| S24    | 13   | 8        | Spl       |       |       | 30.07 | 18.19 |      | 12.10 |       |      |      |       |     |      |    |      | 39.64 |     |     |      |      |      |     |      |      | 100   | 115          |
| S24    | 13   | 9        | Feohy +   | 2.78  |       | 1.11  | 94.29 | 0.48 |       |       |      |      | 1.35  |     |      |    |      |       |     |     |      |      |      |     |      |      | 100   | 90           |
| S24    | 13   | 10       | Ti-Mag    |       | 28.19 | 0.58  | 68.69 | 1.74 | 0.80  |       |      |      |       |     |      |    |      |       |     |     |      |      |      |     |      |      | 100   | 107          |
| S24    | 13   | 11       | Ap        |       |       |       | 0.49  |      |       | 47.79 |      |      | 41.76 |     | 8.21 |    |      |       |     |     |      |      |      |     |      | 1.75 | 100   | 110          |
| S24    | 13   | 12       | Feohy +   | 6.61  |       | 5.11  | 83.70 |      |       | 0.48  | 1.25 |      | 2.24  |     |      |    |      |       |     |     | 0.62 |      |      |     |      |      | 100   | 82           |
| S24    | 13   | 13       | Spl       |       |       | 52.49 | 12.25 |      | 17.11 |       |      |      |       |     |      |    |      | 18.15 |     |     |      |      |      |     |      |      | 100   | 111          |
| S24    | 13   | 14       | Chr       |       |       | 13.87 | 25.07 |      | 9.03  |       |      |      |       |     |      |    |      | 52.03 |     |     |      |      |      |     |      |      | 100   | 107          |
| S24    | 13   | 15       | Ilm       |       | 57.33 |       | 40.71 | 1.96 |       |       |      |      |       |     |      |    |      |       |     |     |      |      |      |     |      |      | 100   | 98           |
| S24    | 13   | 16       | Qz +      | 94.94 |       |       | 5.06  |      |       |       |      |      |       |     |      |    |      |       |     |     |      |      |      |     |      |      | 100   | 100          |
| S24    | 13   | 17       | Ep        | 40.26 |       | 23.16 | 11.71 |      |       | 21.88 |      |      |       |     |      |    |      |       |     |     |      |      |      |     |      |      | 97    | 103          |
| S24    | 13   | 18       | Feohy +   | 3.18  |       | 0.86  | 95.56 |      |       | 0.39  |      |      |       |     |      |    |      |       |     |     |      |      |      |     |      |      | 100   | 72           |
| S24    | 13   | 19       | Feohy +   | 5.35  | 0.57  | 5.26  | 80.30 |      |       | 0.51  |      |      | 1.85  |     |      |    |      | 0.55  |     |     | 0.89 |      |      |     |      | 4.71 | 100   | 74           |
| S24    | 13   | 20       | Feohy +   | 2.58  |       |       | 96.52 |      |       | 0.48  |      |      |       |     |      |    |      | 0.41  |     |     |      |      |      |     |      |      | 100   | 86           |
| S24    | 13   | 21       | Feohy +   | 4.73  |       | 1.08  | 94.20 |      |       |       |      |      |       |     |      |    |      |       |     |     |      |      |      |     |      |      | 100   | 87           |
| S24    | 13   | 22       | Grt       | 39.72 |       | 21.17 | 29.79 | 3.20 | 3.72  | 2.40  |      |      |       |     |      |    |      |       |     |     |      |      |      |     |      |      | 100   | 117          |
| S24    | 13   | 23       | Feohy +   | 3.54  |       |       | 94.70 | 1.42 |       | 0.35  |      |      |       |     |      |    |      |       |     |     |      |      |      |     |      |      | 100   | 78           |
| S24    | 13   | 24       | Feohy +   | 4.96  |       | 1.96  | 91.59 |      |       |       |      |      | 1.48  |     |      |    |      |       |     |     |      |      |      |     |      |      | 100   | 84           |
| S24    | 13   | 25       | TiO2      | 0.91  | 98.30 |       | 0.79  |      |       |       |      |      |       |     |      |    |      |       |     |     |      |      |      |     |      |      | 100   | 103          |
| S24    | 13   | 26       | Feohy +   | 4.21  |       | 2.56  | 86.05 |      |       | 0.60  | 0.80 |      | 1.82  |     |      |    |      | 0.65  |     |     |      |      |      |     |      | 3.31 | 100   | 83           |
| S24    | 13   | 27       | Feohy +   | 6.64  |       | 2.65  | 88.42 |      |       | 0.60  |      |      | 1.69  |     |      |    |      |       |     |     |      |      |      |     |      |      | 100   | 75           |
| S24    | 13   | 28       | Ep        | 40.15 |       | 24.21 | 10.20 |      |       | 22.43 |      |      |       |     |      |    |      |       |     |     |      |      |      |     |      |      | 97    | 102          |
| S24    | 13   | 29       | Mix       | 47.77 |       | 11.35 | 34.40 |      | 1.16  | 0.31  |      | 0.96 | 2.31  |     |      |    |      | 0.38  |     |     |      |      |      |     |      | 1.36 | 100   | 93           |
| S24    | 13   | 30       | Grt       | 39.66 |       | 21.02 | 26.58 | 3.47 | 0.88  | 8.39  |      |      |       |     |      |    |      |       |     |     |      |      |      |     |      |      | 100   | 106          |
| S24    | 14   | 1        | Feohy +   | 2.92  |       | 1.66  | 92.25 |      |       | 0.47  |      |      | 1.64  |     |      |    |      | 1.06  |     |     |      |      |      |     |      |      | 100   | 89           |
| S24    | 14   | 2        | Feohy +   | 1.87  |       | 1.37  | 95.16 |      |       | 0.50  |      |      | 1.11  |     |      |    |      |       |     |     |      |      |      |     |      |      | 100   | 93           |
| S24    | 14   | 3        | Feohy +   | 11.55 |       | 8.00  | 77.39 |      |       |       |      |      | 2.22  |     |      |    |      |       |     |     | 0.84 |      |      |     |      |      | 100   | 82           |

Table B12.1: Mineral chemical analyses from sample S24.

| Sample | Site | Position | Mineral          | SiO2  | TiO2  | Al2O3 | FeO   | MnO   | MgO   | CaO   | Na2O | K2O  | P2O5  | SO3 | F     | Cl | V2O5 | Cr2O3 | CoO  | NiO  | CuO  | ZnO | ZrO2  | BaO | HfO2 | WO3  | Total | Actual Total |
|--------|------|----------|------------------|-------|-------|-------|-------|-------|-------|-------|------|------|-------|-----|-------|----|------|-------|------|------|------|-----|-------|-----|------|------|-------|--------------|
| S24    | 14   | 4        | Grt              | 41.23 |       | 21.27 | 1.86  | 0.35  |       | 35.28 |      |      |       |     |       |    |      |       |      |      |      |     |       |     |      |      | 100   | 113          |
| S24    | 14   | 5        | Feohy +          | 4.04  |       | 1.89  | 91.76 |       |       |       |      |      | 1.20  |     |       |    |      | 0.44  |      |      | 0.67 |     |       |     |      |      | 100   | 84           |
| S24    | 14   | 6        | Ms +             | 56.94 | 0.92  | 22.44 | 8.55  | 3.05  | 1.35  | 0.38  | 1.53 | 2.17 |       |     |       |    |      |       |      |      |      |     |       |     |      | 2.67 | 100   | 96           |
| S24    | 14   | 7        | Chr              |       |       | 12.76 | 21.58 |       | 8.19  |       |      |      |       |     |       |    |      | 57.47 |      |      |      |     |       |     |      |      | 100   | 102          |
| S24    | 14   | 8        | Feohy +          | 3.11  |       | 2.22  | 92.46 | 0.52  |       |       |      |      | 1.10  |     |       |    |      | 0.59  |      |      |      |     |       |     |      |      | 100   | 79           |
| S24    | 14   | 9        | TiO <sub>2</sub> |       | 99.54 |       | 0.46  |       |       |       |      |      |       |     |       |    |      |       |      |      |      |     |       |     |      |      | 100   | 101          |
| S24    | 14   | 10       | Feohy +          | 4.09  |       | 2.05  | 92.86 |       |       | 0.59  |      |      |       |     |       |    |      | 0.41  |      |      |      |     |       |     |      |      | 100   | 83           |
| S24    | 14   | 11       | Zrn              | 31.00 |       |       |       |       |       |       |      |      |       |     |       |    |      |       |      |      |      |     | 69.00 |     |      |      | 100   | 116          |
| S24    | 14   | 12       | Ap               |       |       |       |       |       |       | 47.76 |      |      | 44.49 |     | 5.94  |    |      |       |      |      |      |     |       |     |      | 1.81 | 100   | 120          |
| S24    | 14   | 13       | Feohy +          | 2.74  |       | 1.75  | 92.52 |       |       | 0.86  |      |      | 1.54  |     |       |    |      | 0.59  |      |      |      |     |       |     |      |      | 100   | 85           |
| S24    | 14   | 14       | Feohy +          | 7.40  |       | 2.84  | 87.82 |       |       | 0.54  |      |      | 1.40  |     |       |    |      |       |      |      |      |     |       |     |      |      | 100   | 77           |
| S24    | 14   | 15       | Feohy +          | 4.52  |       | 2.61  | 89.91 | 0.63  |       | 0.70  |      |      | 1.62  |     |       |    |      |       |      |      |      |     |       |     |      |      | 100   | 82           |
| S24    | 14   | 16       | Feohy +          | 7.35  |       | 3.63  | 86.66 |       |       | 0.77  |      |      | 1.60  |     |       |    |      |       |      |      |      |     |       |     |      |      | 100   | 73           |
| S24    | 14   | 17       | Ttn              | 34.23 | 35.18 | 1.18  | 1.98  |       |       | 27.43 |      |      |       |     |       |    |      |       |      |      |      |     |       |     |      |      | 100   | 101          |
| S24    | 14   | 18       | Feohy +          | 6.86  |       | 5.10  | 84.28 |       |       |       | 0.89 |      | 2.87  |     |       |    |      |       |      |      |      |     |       |     |      |      | 100   | 82           |
| S24    | 14   | 19       | Feohy +          | 3.93  |       | 2.34  | 90.95 |       |       | 0.76  |      |      | 1.37  |     |       |    |      | 0.65  |      |      |      |     |       |     |      |      | 100   | 87           |
| S24    | 14   | 20       | Mix              | 72.74 | 0.47  | 16.87 | 5.38  | 1.21  | 1.11  |       | 0.93 | 1.30 |       |     |       |    |      |       |      |      |      |     |       |     |      |      | 100   | 100          |
| S24    | 14   | 21       | Feohy +          | 4.36  |       | 1.53  | 92.64 |       |       | 0.41  |      |      | 1.05  |     |       |    |      |       |      |      |      |     |       |     |      |      | 100   | 87           |
| S24    | 14   | 22       | Feohy +          | 3.62  |       | 1.71  | 92.16 | 0.52  |       | 0.39  |      |      | 1.60  |     |       |    |      |       |      |      |      |     |       |     |      |      | 100   | 93           |
| S24    | 14   | 23       | Grt              | 40.24 |       | 21.01 | 16.45 | 8.49  | 3.31  | 10.51 |      |      |       |     |       |    |      |       |      |      |      |     |       |     |      |      | 100   | 120          |
| S24    | 14   | 24       | Mix              | 8.14  | 0.44  | 25.87 |       | 38.73 | 1.38  | 0.35  | 2.81 | 0.56 |       |     | 14.96 |    |      |       | 0.51 | 4.80 | 1.46 |     |       |     |      |      | 100   | 102          |
| S24    | 14   | 25       | Feohy +          | 3.60  |       | 1.71  | 89.90 | 0.87  | 0.61  |       |      |      | 0.98  |     |       |    |      |       |      |      |      |     |       |     |      | 2.34 | 100   | 91           |
| S24    | 15   | 1        | Feohy +          | 3.95  | 0.59  | 3.26  | 83.95 |       |       | 0.47  | 0.77 |      | 2.38  |     |       |    |      |       |      |      |      |     |       |     |      | 4.62 | 100   | 81           |
| S24    | 15   | 2        | Feohy +          | 3.95  |       | 1.70  | 91.12 | 1.34  |       | 0.54  |      |      | 1.34  |     |       |    |      |       |      |      |      |     |       |     |      |      | 100   | 83           |
| S24    | 15   | 3        | Feohy            |       | 12.83 |       | 87.17 |       |       |       |      |      |       |     |       |    |      |       |      |      |      |     |       |     |      |      | 100   | 99           |
| S24    | 15   | 4        | Feohy +          | 2.79  |       | 1.88  | 90.44 |       |       | 0.48  |      |      | 1.59  |     |       |    |      |       |      |      |      |     |       |     |      | 2.83 | 100   | 94           |
| S24    | 15   | 5        | Feohy +          | 24.85 | 0.47  | 14.77 | 54.86 | 0.57  | 0.89  | 0.51  | 0.60 | 0.46 | 2.01  |     |       |    |      |       |      |      |      |     |       |     |      |      | 100   | 91           |
| S24    | 15   | 6        | Spl              |       |       | 44.64 | 14.94 |       | 14.28 |       |      |      |       |     |       |    |      | 26.14 |      |      |      |     |       |     |      |      | 100   | 108          |
| S24    | 15   | 7        | Feohy            | 0.57  |       |       | 98.87 | 0.56  |       |       |      |      |       |     |       |    |      |       |      |      |      |     |       |     |      |      | 100   | 139          |
| S24    | 15   | 8        | Grt              | 38.98 |       | 19.42 | 19.82 | 17.81 | 2.78  | 1.20  |      |      |       |     |       |    |      |       |      |      |      |     |       |     |      |      | 100   | 112          |
| S24    | 15   | 9        | Grt              | 39.42 |       | 20.57 | 30.18 | 3.65  | 1.60  | 4.58  |      |      |       |     |       |    |      |       |      |      |      |     |       |     |      |      | 100   | 114          |
| S24    | 15   | 10       | Ep               | 40.61 |       | 20.16 | 14.62 |       |       | 21.18 | 0.44 |      |       |     |       |    |      |       |      |      |      |     |       |     |      |      | 97    | 110          |
| S24    | 15   | 11       | Feohy +          | 5.24  |       | 6.87  | 78.00 |       |       | 0.65  |      |      | 2.98  |     |       |    |      | 0.70  |      |      |      |     |       |     |      | 5.55 | 100   | 77           |
| S24    | 15   | 12       | Ep               | 40.04 |       | 22.64 | 11.84 |       |       | 22.48 |      |      |       |     |       |    |      |       |      |      |      |     |       |     |      |      | 97    | 107          |
| S24    | 15   | 13       | Feohy +          | 2.47  |       | 2.58  | 90.09 |       |       | 0.71  |      |      | 1.94  |     |       |    |      |       |      |      |      |     |       |     |      | 2.21 | 100   | 85           |
| S24    | 15   | 14       | Chr              |       |       | 12.15 | 15.62 |       | 12.21 |       |      |      |       |     |       |    |      | 60.02 |      |      |      |     |       |     |      |      | 100   | 102          |
| S24    | 15   | 15       | Ep               | 39.72 |       | 21.66 | 13.01 |       |       | 22.61 |      |      |       |     |       |    |      |       |      |      |      |     |       |     |      |      | 97    | 105          |
| S24    | 15   | 16       | Qz + Feohy       | 67.78 |       | 4.22  | 26.68 |       | 0.63  |       |      | 0.68 |       |     |       |    |      |       |      |      |      |     |       |     |      |      | 100   | 92           |
| S24    | 15   | 17       | Feohy +          | 3.69  |       |       | 95.46 |       | 0.85  |       |      |      |       |     |       |    |      |       |      |      |      |     |       |     |      |      | 100   | 83           |
| S24    | 15   | 18       | Mix              | 14.56 | 1.80  | 8.76  | 63.62 | 0.95  | 1.88  | 1.69  | 1.72 | 0.50 | 3.57  |     |       |    |      | 0.93  |      |      |      |     |       |     |      |      | 100   | 38           |
| S24    | 15   | 19       | Mix              | 26.32 | 0.62  | 16.98 | 47.23 |       | 1.19  |       | 0.74 | 1.06 | 2.43  |     |       |    |      |       |      |      |      |     |       |     |      | 3.42 | 100   | 78           |
| S24    | 15   | 20       | Feohy +          | 9.32  |       | 5.10  | 83.41 |       |       | 0.53  |      |      | 1.65  |     |       |    |      |       |      |      |      |     |       |     |      |      | 100   | 72           |
| S24    | 15   | 21       | Chr              |       |       | 16.96 | 19.91 |       | 8.60  |       |      |      |       |     |       |    |      | 54.53 |      |      |      |     |       |     |      |      | 100   | 100          |
| S24    | 15   | 22       | Feohy +          | 3.49  |       | 1.90  | 88.69 |       |       | 0.41  |      |      | 1.78  |     |       |    |      | 0.57  |      |      |      |     |       |     |      | 3.17 | 100   | 83           |
| S24    | 15   | 23       | Ep               | 39.45 |       | 23.35 | 11.49 | 0.40  |       | 22.31 |      |      |       |     |       |    |      |       |      |      |      |     |       |     |      |      | 97    | 108          |
| S24    | 15.1 | 1        | Qz               | 99.55 |       |       | 0.45  |       |       |       |      |      |       |     |       |    |      |       |      |      |      |     |       |     |      |      | 100   | 121          |

Table B12.1: Mineral chemical analyses from sample S24.

| Sample | Site | Position | Mineral       | SiO2  | TiO2  | Al2O3 | FeO   | MnO   | MgO   | CaO   | Na2O | K2O  | P2O5 | SO3 | F     | Cl | V2O5 | Cr2O3 | CoO  | NiO  | CuO  | ZnO  | ZrO2 | BaO | HfO2 | WO3 | Total | Actual Total |
|--------|------|----------|---------------|-------|-------|-------|-------|-------|-------|-------|------|------|------|-----|-------|----|------|-------|------|------|------|------|------|-----|------|-----|-------|--------------|
| S24    | 15.1 | 2        | Chl +         | 34.42 | 0.65  | 13.24 | 44.06 | 0.75  | 2.86  |       | 0.61 | 1.99 | 1.42 |     |       |    |      |       |      |      |      |      |      |     |      |     | 100   | 90           |
| S24    | 15.1 | 3        | Mix           | 22.12 |       | 8.19  | 65.32 | 0.58  |       | 0.29  | 0.67 | 0.63 | 2.18 |     |       |    |      |       |      |      |      |      |      |     |      |     | 100   | 93           |
| S24    | 16   | 1        | Feohy +       | 4.19  |       | 2.04  | 90.99 |       |       | 0.55  |      |      | 1.66 |     |       |    |      |       |      |      | 0.56 |      |      |     |      |     | 100   | 89           |
| S24    | 16   | 2        | Feohy +       | 7.53  |       | 2.30  | 87.82 |       |       | 0.56  |      |      | 1.26 |     |       |    |      |       |      |      | 0.51 |      |      |     |      |     | 100   | 85           |
| S24    | 16   | 3        | Mix           | 38.17 |       | 11.16 | 45.09 | 0.64  | 0.87  | 0.53  |      | 1.21 | 2.11 |     |       |    |      |       |      |      | 0.21 |      |      |     |      |     | 100   | 103          |
| S24    | 16   | 4        | Mix           | 24.23 | 0.80  | 16.02 | 50.88 |       |       |       | 2.87 | 0.63 | 1.86 |     |       |    | 0.53 |       |      |      |      |      |      |     | 2.18 | 100 | 102   |              |
| S24    | 16   | 5        | Mix           | 12.96 |       | 27.26 | 4.70  | 34.57 | 1.35  |       | 1.48 | 0.80 |      |     | 10.62 |    |      |       | 4.96 | 0.63 | 0.68 |      |      |     |      |     | 100   | 104          |
| S24    | 16   | 6        | Feohy +       | 5.33  |       | 2.91  | 89.20 |       |       | 0.49  |      |      | 1.53 |     |       |    |      |       |      |      | 0.54 |      |      |     |      |     | 100   | 94           |
| S24    | 16   | 7        | Feohy +       | 6.98  |       | 5.20  | 83.19 |       | 0.70  | 0.40  |      |      | 2.55 |     |       |    |      |       |      |      | 0.99 |      |      |     |      |     | 100   | 87           |
| S24    | 16   | 8        | Feohy +       | 3.52  |       | 1.51  | 91.51 | 0.83  |       | 0.56  |      |      | 1.38 |     |       |    |      |       |      |      | 0.69 |      |      |     |      |     | 100   | 86           |
| S24    | 16   | 9        | Feohy +       | 6.99  |       | 2.13  | 87.45 |       |       |       |      |      | 1.33 |     |       |    |      |       |      |      | 2.10 |      |      |     |      |     | 100   | 83           |
| S24    | 16   | 10       | Feohy +       | 4.89  |       | 1.55  | 90.74 |       |       | 0.82  |      |      | 1.48 |     |       |    |      |       |      |      | 0.51 |      |      |     |      |     | 100   | 82           |
| S24    | 16   | 11       | Feohy +       | 3.76  |       |       | 95.37 |       |       |       |      |      |      |     |       |    |      |       |      |      | 0.87 |      |      |     |      |     | 100   | 77           |
| S24    | 16   | 12       | Mix           | 17.71 |       | 28.38 | 3.95  | 31.27 | 2.17  |       | 1.21 | 1.39 |      |     | 7.80  |    |      | 0.73  | 4.81 | 0.59 |      |      |      |     |      |     | 100   | 95           |
| S24    | 16   | 13       | Feohy + Chl + | 18.65 |       | 5.96  | 70.00 |       | 0.98  | 0.63  |      | 0.60 | 1.08 |     |       |    |      |       |      |      | 2.10 |      |      |     |      |     | 100   | 82           |
| S24    | 16   | 14       | Ttn +         | 30.64 | 32.46 | 7.33  | 6.59  |       | 2.94  | 14.64 | 0.66 |      |      |     | 4.75  |    |      |       |      |      |      |      |      |     |      |     | 100   | 76           |
| S24    | 16   | 15       | Feohy +       | 4.93  |       |       | 92.41 | 0.52  |       | 0.52  |      |      | 1.08 |     |       |    |      |       |      |      | 0.54 |      |      |     |      |     | 100   | 88           |
| S24    | 16   | 16       | Feohy +       | 3.85  |       | 1.10  | 92.71 | 0.59  |       |       |      |      |      |     |       |    |      |       | 0.99 |      | 0.75 |      |      |     |      |     | 100   | 81           |
| S24    | 16   | 17       | Feohy +       | 4.88  |       | 2.28  | 89.07 |       |       | 0.39  |      |      | 2.34 |     |       |    |      | 0.88  |      |      | 0.16 |      |      |     |      |     | 100   | 91           |
| S24    | 16   | 18       | Feohy + Chl + | 32.04 |       | 12.62 | 44.29 | 0.35  | 3.14  | 0.55  | 1.12 | 0.89 | 2.23 |     |       |    |      |       |      |      |      |      |      |     | 2.76 | 100 | 101   |              |
| S24    | 16   | 19       | Feohy         | 1.01  |       | 0.56  | 96.60 | 0.53  |       |       | 1.31 |      |      |     |       |    |      |       |      |      |      |      |      |     |      |     | 100   | 125          |
| S24    | 16   | 20       | Qz +          | 78.14 |       | 8.86  | 3.97  |       |       | 8.67  |      |      |      |     |       |    |      |       |      |      | 0.36 |      |      |     |      |     | 100   | 94           |
| S24    | 16   | 21       | Ttn +         | 23.25 | 49.45 | 1.71  | 2.85  | 0.44  |       | 22.13 |      |      |      |     |       |    |      |       |      |      | 0.18 |      |      |     |      |     | 100   | 108          |
| S24    | 16   | 22       | Mix           | 35.18 | 1.34  | 16.16 | 41.65 |       | 0.66  |       | 1.07 | 1.22 | 1.93 |     |       |    | 0.80 |       |      |      |      |      |      |     |      |     | 100   | 98           |
| S24    | 16.1 | 1        | Feohy         | 1.05  |       |       | 97.76 |       |       | 0.40  |      |      |      |     |       |    |      |       |      |      | 0.78 |      |      |     |      |     | 100   | 89           |
| S24    | 16.1 | 2        | Mag           |       |       |       | 98.84 | 0.61  |       |       |      |      |      |     |       |    |      |       |      |      | 0.54 |      |      |     |      |     | 100   | 142          |
| S24    | 16.1 | 3        | Mix           | 34.80 | 1.05  | 14.94 | 44.10 |       | 1.32  | 0.35  | 1.89 | 1.55 |      |     |       |    |      |       |      |      |      |      |      |     |      |     | 100   | 103          |
| S24    | 16.1 | 4        | Mag           | 0.56  |       |       | 98.24 | 0.59  |       |       |      |      |      |     |       |    |      |       |      |      | 0.62 |      |      |     |      |     | 100   | 141          |
| S24    | 17   | 1        | Feohy +       | 3.77  |       | 1.05  | 93.46 |       |       |       |      |      | 1.33 |     |       |    |      |       |      |      | 0.39 |      |      |     |      |     | 100   | 81           |
| S24    | 17   | 2        | Feohy +       | 3.71  |       | 1.74  | 89.63 |       |       |       |      |      | 1.72 |     |       |    |      |       |      |      | 0.85 |      |      |     | 2.35 |     | 100   | 83           |
| S24    | 17   | 3        | Mix           | 21.77 |       | 11.36 | 56.81 | 1.19  | 5.43  | 0.42  | 0.93 | 1.15 | 0.94 |     |       |    |      |       |      |      |      |      |      |     |      |     | 100   | 81           |
| S24    | 17   | 4        | Ilm + Qz      | 36.06 | 34.12 |       | 25.36 | 4.04  |       |       | 0.42 |      |      |     |       |    |      |       |      |      |      |      |      |     |      |     | 100   | 127          |
| S24    | 17   | 5        | Chr           |       |       | 23.05 | 20.44 |       | 12.65 |       |      |      |      |     |       |    |      | 43.24 |      |      |      | 0.62 |      |     |      |     | 100   | 110          |
| S24    | 17   | 6        | "Ilm"         |       | 71.89 | 0.55  | 22.80 |       | 4.52  |       |      |      |      |     |       |    |      |       |      |      | 0.24 |      |      |     |      |     | 100   | 100          |
| S24    | 17   | 7        | Chr           |       |       | 7.29  | 23.73 |       | 7.95  |       |      |      |      |     |       |    |      | 60.52 |      |      |      | 0.51 |      |     |      |     | 100   | 107          |
| S24    | 17   | 8        | TiO2 +        | 1.70  | 93.52 | 0.79  | 3.98  |       |       |       |      |      |      |     |       |    |      |       |      |      |      |      |      |     |      |     | 100   | 107          |
| S24    | 17   | 9        | Feohy +       | 7.66  |       | 5.12  | 82.03 |       |       | 0.38  |      |      | 2.85 |     |       |    |      |       |      |      | 1.06 | 0.89 |      |     |      |     | 100   | 81           |
| S24    | 17   | 10       | Chr           |       |       | 11.45 | 17.75 |       | 9.21  |       |      |      |      |     |       |    |      | 61.01 |      |      |      | 0.58 |      |     |      |     | 100   | 112          |
| S24    | 17   | 11       | Feohy +       | 3.77  |       | 1.82  | 91.99 |       |       | 0.48  |      |      | 1.43 |     |       |    |      |       |      |      | 0.51 |      |      |     |      |     | 100   | 90           |
| S24    | 17   | 12       | Feohy +       | 5.37  |       | 2.18  | 89.98 |       |       | 0.67  |      |      | 1.20 |     |       |    |      |       |      |      | 0.60 |      |      |     |      |     | 100   | 86           |
| S24    | 17   | 13       | Feohy +       | 3.80  |       | 1.47  | 92.28 |       |       |       |      |      | 1.78 |     |       |    |      |       |      |      | 0.68 |      |      |     |      |     | 100   | 90           |
| S24    | 17   | 14       | Feohy +       | 4.51  |       | 1.66  | 91.59 |       |       | 0.44  |      |      | 1.11 |     |       |    |      |       |      |      | 0.69 |      |      |     |      |     | 100   | 95           |
| S24    | 17   | 15       | Feohy +       | 4.77  |       | 2.23  | 91.69 |       |       | 0.52  |      |      |      |     |       |    |      |       |      |      | 0.79 |      |      |     |      |     | 100   | 91           |
| S24    | 17   | 16       | Feohy +       | 5.40  |       | 3.39  | 88.91 |       |       |       |      |      | 1.65 |     |       |    |      |       |      |      | 0.64 |      |      |     |      |     | 100   | 78           |
| S24    | 17   | 17       | Spl           |       |       | 45.70 | 15.67 |       | 14.21 |       |      |      |      |     |       |    |      | 23.78 |      |      |      | 0.64 |      |     |      |     | 100   | 107          |
| S24    | 17   | 18       | Feohy +       | 4.51  |       | 2.61  | 87.30 |       |       | 0.37  |      |      | 1.77 |     |       |    |      |       |      |      | 0.95 |      |      |     | 2.48 | 100 | 85    |              |

Table B12.1: Mineral chemical analyses from sample S24.

| Sample | Site | Position | Mineral            | SiO2  | TiO2  | Al2O3 | FeO   | MnO   | MgO   | CaO   | Na2O | K2O  | P2O5 | SO3 | F | Cl | V2O5 | Cr2O3 | CoO | NiO  | CuO  | ZnO  | ZrO2  | BaO | HfO2 | WO3  | Total | Actual Total |
|--------|------|----------|--------------------|-------|-------|-------|-------|-------|-------|-------|------|------|------|-----|---|----|------|-------|-----|------|------|------|-------|-----|------|------|-------|--------------|
| S24    | 17   | 19       | Feohy +            | 3.43  |       | 1.33  | 93.84 |       |       |       |      |      | 1.00 |     |   |    |      |       |     |      |      | 0.39 |       |     |      |      | 100   | 89           |
| S24    | 17   | 20       | Feohy +            | 4.54  |       | 1.89  | 91.08 |       |       | 0.53  |      |      | 1.48 |     |   |    |      |       |     |      |      | 0.48 |       |     |      |      | 100   | 85           |
| S24    | 17.1 | 1        | Feohy +            | 4.36  |       | 1.51  | 91.73 |       |       | 0.39  |      |      | 1.39 |     |   |    |      |       |     |      |      | 0.62 |       |     |      |      | 100   | 87           |
| S24    | 17.1 | 2        | Feohy +            | 12.39 |       | 9.41  | 73.60 |       | 0.83  | 0.42  |      | 0.39 | 2.06 |     |   |    |      |       |     |      |      | 0.89 |       |     |      |      | 100   | 85           |
| S24    | 17.1 | 3        | Feohy +            | 6.31  |       | 1.75  | 89.57 |       |       | 0.57  |      |      | 1.18 |     |   |    |      |       |     |      |      | 0.61 |       |     |      |      | 100   | 85           |
| S24    | 18   | 1        | Mix                | 11.53 |       | 21.76 | 38.31 | 21.56 | 1.14  | 0.53  |      | 0.47 | 1.31 |     |   |    |      |       |     | 2.73 |      | 0.66 |       |     |      |      | 100   | 79           |
| S24    | 18   | 2        | Feohy +            | 14.94 |       | 7.83  | 72.67 |       | 1.03  | 0.45  |      | 0.82 | 1.56 |     |   |    |      |       |     |      |      | 0.71 |       |     |      |      | 100   | 81           |
| S24    | 18   | 3        | Mix                | 57.98 | 0.57  | 21.24 | 10.42 | 3.47  | 1.91  | 0.62  |      | 2.68 | 0.92 |     |   |    |      |       |     |      |      | 0.18 |       |     |      |      | 100   | 79           |
| S24    | 18   | 4        | Mix                | 17.37 |       | 7.23  | 70.71 |       | 1.47  | 0.64  |      | 1.28 | 1.30 |     |   |    |      |       |     |      |      |      |       |     |      |      | 100   | 71           |
| S24    | 18   | 5        | Feohy +            | 2.48  |       | 1.29  | 93.08 |       |       |       |      |      |      |     |   |    |      |       |     |      |      | 0.79 |       |     |      | 2.37 | 100   | 84           |
| S24    | 18   | 6        | Mix                | 43.44 | 5.36  |       | 40.82 | 1.53  | 0.52  | 0.34  | 7.98 |      |      |     |   |    |      |       |     |      |      |      |       |     |      |      | 100   | 111          |
| S24    | 18   | 7        | Feohy +            | 3.99  |       | 1.37  | 93.14 | 0.86  |       |       |      |      |      |     |   |    |      |       |     |      |      | 0.64 |       |     |      |      | 100   | 79           |
| S24    | 18   | 8        | "Ilm" +            | 4.32  | 85.78 | 2.70  | 2.53  |       | 4.05  |       |      |      |      |     |   |    |      |       |     |      |      | 0.62 |       |     |      |      | 100   | 106          |
| S24    | 18   | 9        | Feohy +            | 3.84  |       | 2.00  | 90.67 |       |       | 0.36  |      |      | 2.24 |     |   |    |      | 0.42  |     |      |      | 0.45 |       |     |      |      | 100   | 88           |
| S24    | 18   | 10       | Chr                |       |       | 25.90 | 17.91 |       | 13.32 |       |      |      |      |     |   |    |      | 42.41 |     |      |      | 0.46 |       |     |      |      | 100   | 118          |
| S24    | 18   | 11       | Feohy +            | 2.91  |       | 1.21  | 92.35 |       |       | 0.42  |      |      | 1.65 |     |   |    |      | 0.81  |     |      |      | 0.65 |       |     |      |      | 100   | 93           |
| S24    | 18   | 12       | Zrn                | 31.24 |       |       | 0.52  |       |       |       |      |      |      |     |   |    |      |       |     |      |      | 0.48 | 67.75 |     |      |      | 100   | 123          |
| S24    | 18   | 13       | TiO <sub>2</sub> + | 2.61  | 91.60 | 1.83  | 2.87  |       |       | 0.23  |      |      |      |     |   |    |      |       |     |      |      | 0.86 |       |     |      |      | 100   | 102          |
| S24    | 18   | 14       | Mix                | 6.20  | 0.45  | 6.48  | 79.16 |       | 1.08  |       |      |      | 2.69 |     |   |    |      |       |     |      |      | 1.16 |       |     |      | 2.78 | 100   | 85           |
| S24    | 18   | 15       | Feohy +            | 5.38  |       | 1.20  | 93.00 |       |       |       |      |      |      |     |   |    |      |       |     |      |      | 0.42 |       |     |      |      | 100   | 83           |
| S24    | 18   | 16       | Grt                | 40.19 |       | 21.13 | 30.66 | 1.39  | 4.06  | 2.57  |      |      |      |     |   |    |      |       |     |      |      |      |       |     |      |      | 100   | 120          |
| S24    | 18   | 17       | Ms +               | 47.53 | 0.71  | 27.73 | 16.64 | 0.70  | 1.63  | 0.43  | 1.30 | 2.69 | 0.64 |     |   |    |      |       |     |      |      |      |       |     |      |      | 100   | 89           |
| S24    | 18   | 18       | Feohy +            | 7.17  |       | 5.05  | 83.87 |       |       | 0.42  |      |      | 2.05 |     |   |    |      |       |     |      |      | 1.45 |       |     |      |      | 100   | 83           |
| S24    | 18   | 19       | Feohy +            | 4.00  | 0.67  | 3.70  | 83.37 |       |       | 0.60  | 1.97 |      | 2.20 |     |   |    |      |       |     |      |      |      |       |     |      | 3.50 | 100   | 70           |
| S24    | 18   | 20       | Feohy +            | 18.34 |       | 11.52 | 64.63 |       | 1.06  | 0.83  | 0.97 | 0.62 | 1.49 |     |   |    |      | 0.54  |     |      |      |      |       |     |      |      | 100   | 69           |
| S24    | 18   | 21       | Feohy +            | 4.12  |       | 1.40  | 92.31 |       |       | 0.52  |      |      | 1.03 |     |   |    |      |       |     |      |      | 0.62 |       |     |      |      | 100   | 87           |
| S24    | 18   | 22       | Feohy +            | 4.37  |       | 2.31  | 91.37 |       |       |       |      |      | 1.15 |     |   |    |      |       |     |      |      | 0.81 |       |     |      |      | 100   | 88           |
| S24    | 18   | 23       | Feohy +            | 6.57  |       | 4.68  | 84.57 |       |       |       | 0.95 |      | 2.28 |     |   |    |      |       |     |      |      | 0.95 |       |     |      |      | 100   | 82           |
| S24    | 18   | 24       | Zrn                | 30.87 |       |       | 0.37  |       |       |       |      |      |      |     |   |    |      |       |     |      |      |      | 67.14 |     | 1.62 |      | 100   | 122          |
| S24    | 18   | 25       | Ep                 | 40.61 |       | 24.99 | 9.22  |       |       | 22.19 |      |      |      |     |   |    |      |       |     |      |      |      |       |     |      |      | 97    | 110          |
| S24    | 18   | 26       | Feohy +            | 3.30  |       | 2.42  | 93.41 | 0.73  |       |       |      |      |      |     |   |    |      |       |     |      |      | 0.14 |       |     |      |      | 100   | 87           |
| S24    | 19   | 1        | Feohy +            | 7.52  |       | 4.35  | 85.17 |       |       | 0.45  |      |      | 1.89 |     |   |    |      |       |     |      |      | 0.62 |       |     |      |      | 100   | 76           |
| S24    | 19   | 2        | Chr                |       |       | 23.03 | 16.42 |       | 13.83 |       |      |      |      |     |   |    |      | 45.94 |     |      |      | 0.78 |       |     |      |      | 100   | 104          |
| S24    | 19   | 3        | Ttn                | 32.66 | 37.53 | 1.15  | 0.68  |       |       | 27.65 |      |      |      |     |   |    |      |       |     |      |      | 0.33 |       |     |      |      | 100   | 112          |
| S24    | 19   | 4        | Mix                | 29.58 | 0.61  | 18.71 | 40.93 |       | 0.77  | 0.30  | 4.62 | 1.57 | 2.24 |     |   |    |      | 0.67  |     |      |      |      |       |     |      |      | 100   | 98           |
| S24    | 19   | 5        | Feohy +            | 2.84  |       | 1.71  | 92.80 |       |       | 0.51  |      |      | 1.59 |     |   |    |      |       |     |      |      | 0.56 |       |     |      |      | 100   | 88           |
| S24    | 19   | 6        | TiO <sub>2</sub> + | 1.36  | 96.53 | 0.84  | 0.63  |       |       |       |      | 0.21 |      |     |   |    |      |       |     |      |      | 0.45 |       |     |      |      | 100   | 117          |
| S24    | 19   | 7        | Feohy +            | 2.22  |       | 1.50  | 94.90 |       |       |       |      |      | 1.05 |     |   |    |      |       |     |      |      | 0.34 |       |     |      |      | 100   | 95           |
| S24    | 19   | 8        | Feohy +            | 3.94  |       | 1.15  | 90.80 | 1.94  |       | 0.47  |      |      | 1.03 |     |   |    |      |       |     |      |      | 0.68 |       |     |      |      | 100   | 87           |
| S24    | 19   | 9        | Feohy +            | 5.19  |       | 1.03  | 90.12 | 2.48  |       | 0.41  |      |      |      |     |   |    |      |       |     |      |      | 0.76 |       |     |      |      | 100   | 83           |
| S24    | 19   | 10       | Feohy +            | 3.49  |       | 2.46  | 88.28 | 0.77  |       |       |      |      | 1.67 |     |   |    |      |       |     |      |      | 0.79 |       |     |      | 2.53 | 100   | 88           |
| S24    | 19   | 11       | Spl                |       |       | 32.15 | 15.53 |       | 15.65 |       |      |      |      |     |   |    |      | 36.26 |     |      |      | 0.41 |       |     |      |      | 100   | 112          |
| S24    | 19   | 12       | Feohy +            | 4.18  |       |       | 92.96 |       |       | 0.42  |      |      | 1.99 |     |   |    |      |       |     |      |      | 0.45 |       |     |      |      | 100   | 81           |
| S24    | 19   | 13       | Spl                |       |       | 46.79 | 14.39 |       | 15.20 |       |      |      |      |     |   |    |      | 22.98 |     |      |      | 0.64 |       |     |      |      | 100   | 104          |
| S24    | 19   | 14       | Feohy +            | 10.85 |       | 5.34  | 79.76 |       |       | 0.64  |      |      | 1.40 |     |   |    |      |       |     |      | 0.67 | 1.34 |       |     |      |      | 100   | 75           |



Table B12.1: Mineral chemical analyses from sample S24.

| Sample | Site | Position | Mineral          | SiO2  | TiO2  | Al2O3 | FeO   | MnO   | MgO   | CaO   | Na2O | K2O  | P2O5  | SO3  | F    | Cl | V2O5 | Cr2O3 | CoO | NiO  | CuO  | ZnO  | ZrO2 | BaO | HfO2 | WO3  | Total | Actual Total |
|--------|------|----------|------------------|-------|-------|-------|-------|-------|-------|-------|------|------|-------|------|------|----|------|-------|-----|------|------|------|------|-----|------|------|-------|--------------|
| S24    | 19   | 15       | Chr              |       |       | 23.43 | 15.59 |       | 13.11 |       |      |      |       |      |      |    | 0.43 | 47.45 |     |      |      |      |      |     |      |      | 100   | 107          |
| S24    | 19   | 16       | Ep               | 40.39 |       | 21.57 | 13.07 |       |       | 21.97 |      |      |       |      |      |    |      |       |     |      |      |      |      |     |      |      | 97    | 111          |
| S24    | 19   | 17       | Feohy +          | 3.28  |       |       | 95.75 |       |       | 0.53  |      |      |       |      |      |    |      |       |     |      | 0.45 |      |      |     |      |      | 100   | 88           |
| S24    | 19   | 18       | Grt              | 40.32 |       | 21.09 | 27.20 | 0.45  | 4.94  | 6.01  |      |      |       |      |      |    |      |       |     |      |      |      |      |     |      |      | 100   | 112          |
| S24    | 19   | 19       | Feohy +          | 3.79  |       | 2.21  | 88.23 |       |       | 0.53  |      |      | 2.08  |      |      |    |      |       |     |      | 0.60 |      |      |     |      | 2.55 | 100   | 85           |
| S24    | 19   | 20       | Ep               | 40.50 |       | 24.89 | 9.14  |       |       | 22.47 |      |      |       |      |      |    |      |       |     |      |      |      |      |     |      |      | 97    | 106          |
| S24    | 19   | 21       | Feohy +          | 7.52  |       | 1.32  | 88.87 |       |       | 0.56  |      |      | 1.06  |      |      |    |      |       |     |      | 0.67 |      |      |     |      |      | 100   | 77           |
| S24    | 19   | 22       | Amph             | 42.83 | 3.72  | 11.46 | 10.19 |       | 14.09 | 10.95 | 3.05 | 0.73 |       |      |      |    |      |       |     |      |      |      |      |     |      |      | 97    | 106          |
| S24    | 19   | 23       | Feohy +          | 3.32  |       | 1.20  | 94.57 |       |       |       |      |      |       |      |      |    |      |       |     |      | 0.91 |      |      |     |      |      | 100   | 78           |
| S24    | 19   | 24       | Qz               | 99.60 |       |       | 0.40  |       |       |       |      |      |       |      |      |    |      |       |     |      |      |      |      |     |      |      | 100   | 110          |
| S24    | 19   | 25       | Feohy +          | 6.25  |       | 2.86  | 89.38 |       |       | 0.47  |      |      |       |      |      |    |      |       |     |      | 1.04 |      |      |     |      |      | 100   | 80           |
| S24    | 19   | 26       | Feohy +          | 4.34  |       | 1.51  | 88.25 | 1.61  |       |       |      |      | 0.94  |      |      |    |      |       |     |      | 0.80 |      |      |     |      | 2.55 | 100   | 83           |
| S24    | 19   | 27       | Feohy +          | 2.92  |       | 1.67  | 92.91 |       |       | 0.48  |      |      | 1.43  |      |      |    |      |       |     |      | 0.58 |      |      |     |      |      | 100   | 85           |
| S24    | 19   | 28       | Ap               |       |       |       |       |       |       | 50.02 |      |      | 43.83 | 1.17 | 2.92 |    |      |       |     |      |      |      |      |     |      | 2.05 | 100   | 111          |
| S24    | 19   | 29       | Feohy +          | 4.01  | 1.01  |       | 91.10 | 0.66  |       | 0.42  |      |      | 1.26  |      |      |    |      | 0.50  |     |      | 1.05 |      |      |     |      |      | 100   | 76           |
| S24    | 20   | 1        | Mix              | 9.67  |       | 26.10 | 12.87 | 32.89 | 1.21  | 0.29  | 1.85 | 0.64 | 0.83  |      | 8.44 |    |      |       |     | 5.22 |      |      |      |     |      |      | 100   | 83           |
| S24    | 20   | 2        | Feohy +          | 4.98  | 0.54  | 2.96  | 88.69 |       |       | 0.57  |      |      | 1.99  |      |      |    |      |       |     |      | 0.26 |      |      |     |      |      | 100   | 80           |
| S24    | 20   | 3        | "Chr"            | 23.99 | 49.97 | 11.94 | 9.64  |       | 1.84  |       | 1.79 | 0.83 |       |      |      |    |      |       |     |      |      |      |      |     |      |      | 100   | 99           |
| S24    | 20   | 4        | "Chr" +          | 2.78  | 0.84  | 2.66  | 42.85 | 2.77  | 2.06  |       |      |      |       |      |      |    |      | 44.40 |     |      | 1.64 |      |      |     |      |      | 100   | 92           |
| S24    | 20   | 5        | "Chr" + Chl      | 12.88 |       | 9.08  | 73.19 | 0.72  |       | 0.53  |      | 0.49 | 2.86  |      |      |    |      |       |     |      | 0.25 |      |      |     |      |      | 100   | 88           |
| S24    | 20   | 6        | Feohy +          | 3.92  |       | 1.34  | 92.47 |       |       | 0.41  |      |      |       |      |      |    |      |       |     | 1.22 | 0.64 |      |      |     |      |      | 100   | 86           |
| S24    | 20   | 7        | Feohy +          | 6.73  |       | 4.68  | 85.61 |       |       | 0.53  |      |      | 1.64  |      |      |    |      |       |     |      | 0.80 |      |      |     |      |      | 100   | 64           |
| S24    | 20   | 8        | Spl              |       |       | 33.40 | 19.64 |       | 13.64 |       |      |      |       |      |      |    |      | 32.64 |     |      | 0.67 |      |      |     |      |      | 100   | 109          |
| S24    | 20   | 9        | Grt              | 40.36 |       | 20.82 | 24.33 | 1.60  | 2.51  | 10.38 |      |      |       |      |      |    |      |       |     |      |      |      |      |     |      |      | 100   | 111          |
| S24    | 20   | 10       | Feohy +          | 4.27  |       | 1.15  | 93.18 |       |       |       |      |      | 0.94  |      |      |    |      |       |     |      | 0.45 |      |      |     |      |      | 100   | 81           |
| S24    | 20   | 11       | Feohy +          | 2.56  |       |       | 96.86 |       |       |       |      |      |       |      |      |    |      |       |     |      | 0.58 |      |      |     |      |      | 100   | 79           |
| S24    | 20   | 12       | TiO <sub>2</sub> | 0.65  | 93.80 |       | 5.30  |       |       |       |      |      |       |      |      |    |      |       |     |      | 0.25 |      |      |     |      |      | 100   | 99           |
| S24    | 20   | 13       | Feohy +          | 3.29  |       | 1.38  | 93.73 |       |       |       |      |      | 1.00  |      |      |    |      |       |     |      | 0.61 |      |      |     |      |      | 100   | 82           |
| S24    | 20   | 14       | Feohy +          | 8.36  |       | 4.05  | 78.93 |       |       | 0.72  |      |      | 2.03  |      |      |    |      |       |     |      | 1.40 |      |      |     |      | 4.52 | 100   | 72           |
| S24    | 20   | 15       | Feohy +          | 4.93  |       | 1.67  | 92.09 |       |       | 0.56  |      |      |       |      |      |    |      |       |     |      | 0.75 |      |      |     |      |      | 100   | 75           |
| S24    | 20   | 16       | Feohy +          | 7.91  |       | 2.60  | 86.83 |       |       | 0.43  |      |      | 1.54  |      |      |    |      |       |     |      | 0.70 |      |      |     |      |      | 100   | 73           |
| S24    | 20   | 17       | Ep               | 40.39 |       | 24.63 | 9.30  |       |       | 22.68 |      |      |       |      |      |    |      |       |     |      |      |      |      |     |      |      | 97    | 99           |
| S24    | 20   | 18       | Feohy +          | 6.12  |       | 3.38  | 80.73 |       |       | 0.90  |      |      | 1.26  |      |      |    |      |       |     |      | 0.47 |      |      |     |      | 7.15 | 100   | 75           |
| S24    | 20   | 19       | Feohy +          | 19.62 |       | 7.27  | 68.90 |       | 1.05  | 0.63  |      | 0.67 | 1.34  |      |      |    |      |       |     |      | 0.51 |      |      |     |      |      | 100   | 82           |
| S24    | 20   | 20       | Chr              |       | 0.39  | 22.49 | 24.40 |       | 10.79 |       |      |      |       |      |      |    |      | 41.27 |     |      | 0.65 |      |      |     |      |      | 100   | 103          |
| S24    | 20   | 21       | Feohy +          | 4.52  |       | 2.40  | 89.58 |       |       | 0.43  |      |      | 1.91  |      |      |    |      | 0.47  |     |      | 0.69 |      |      |     |      |      | 100   | 81           |
| S24    | 20   | 22       | Feohy +          | 4.55  |       | 1.00  | 90.73 | 1.36  | 0.88  | 0.49  |      |      |       |      |      |    |      |       |     |      | 0.99 |      |      |     |      |      | 100   | 72           |
| S24    | 20   | 23       | Feohy +          | 4.20  |       | 1.54  | 93.14 |       |       |       |      |      | 0.82  |      |      |    |      |       |     |      | 0.29 |      |      |     |      |      | 100   | 89           |
| S24    | 20   | 24       | Mnohy +          | 8.46  | 0.71  | 15.51 | 4.41  | 52.38 | 1.34  | 8.41  |      | 1.04 |       | 0.89 |      |    |      |       |     | 3.80 | 1.12 | 1.93 |      |     |      |      | 100   | 39           |

Table B12.1: Mineral chemical analyses from sample S24.

| Sample | Site | Position | Mineral                                     | SiO2 | TiO2 | Al2O3 | FeO   | MnO | MgO | CaO  | Na2O | K2O | P2O5 | SO3 | F | Cl | V2O5 | Cr2O3 | CoO | NiO | CuO | ZnO  | ZrO2 | BaO | HfO2 | WO3 | Total | Actual Total |
|--------|------|----------|---------------------------------------------|------|------|-------|-------|-----|-----|------|------|-----|------|-----|---|----|------|-------|-----|-----|-----|------|------|-----|------|-----|-------|--------------|
| S24    | 20   | 25       | Feohy +                                     | 3.44 |      | 1.58  | 92.61 |     |     | 0.61 |      |     | 1.17 |     |   |    |      |       |     |     |     | 0.58 |      |     |      |     | 100   | 85           |
| S24    | 20   | 26       | Feohy +                                     | 4.16 |      |       | 93.72 |     |     |      |      |     | 1.57 |     |   |    |      |       |     |     |     | 0.55 |      |     |      |     | 100   | 87           |
| S24    | 20.1 | 1        | Feohy +                                     | 4.45 |      | 2.28  | 91.87 |     |     |      |      |     | 1.07 |     |   |    |      |       |     |     |     | 0.32 |      |     |      |     | 100   | 89           |
| S24    | 20.1 | 2        | Feohy +                                     | 8.33 |      | 5.93  | 84.08 |     |     |      |      |     | 1.11 |     |   |    |      |       |     |     |     | 0.55 |      |     |      |     | 100   | 89           |
| S24    | 20.1 | 3        | Feohy +                                     | 5.08 |      | 2.62  | 91.61 |     |     |      |      |     |      |     |   |    |      |       |     |     |     | 0.69 |      |     |      |     | 100   | 88           |
|        |      |          |                                             |      |      |       |       |     |     |      |      |     |      |     |   |    |      |       |     |     |     |      |      |     |      |     |       |              |
|        |      |          |                                             |      |      |       |       |     |     |      |      |     |      |     |   |    |      |       |     |     |     |      |      |     |      |     |       |              |
|        |      |          | Notes                                       |      |      |       |       |     |     |      |      |     |      |     |   |    |      |       |     |     |     |      |      |     |      |     |       |              |
|        |      |          | + = indicates more than one mineral present |      |      |       |       |     |     |      |      |     |      |     |   |    |      |       |     |     |     |      |      |     |      |     |       |              |
|        |      |          | " " = indicates that mineral is altered     |      |      |       |       |     |     |      |      |     |      |     |   |    |      |       |     |     |     |      |      |     |      |     |       |              |
|        |      |          |                                             |      |      |       |       |     |     |      |      |     |      |     |   |    |      |       |     |     |     |      |      |     |      |     |       |              |
|        |      |          |                                             |      |      |       |       |     |     |      |      |     |      |     |   |    |      |       |     |     |     |      |      |     |      |     |       |              |

B13: SEM-BSE images and EDS mineral analyses for sample S25.

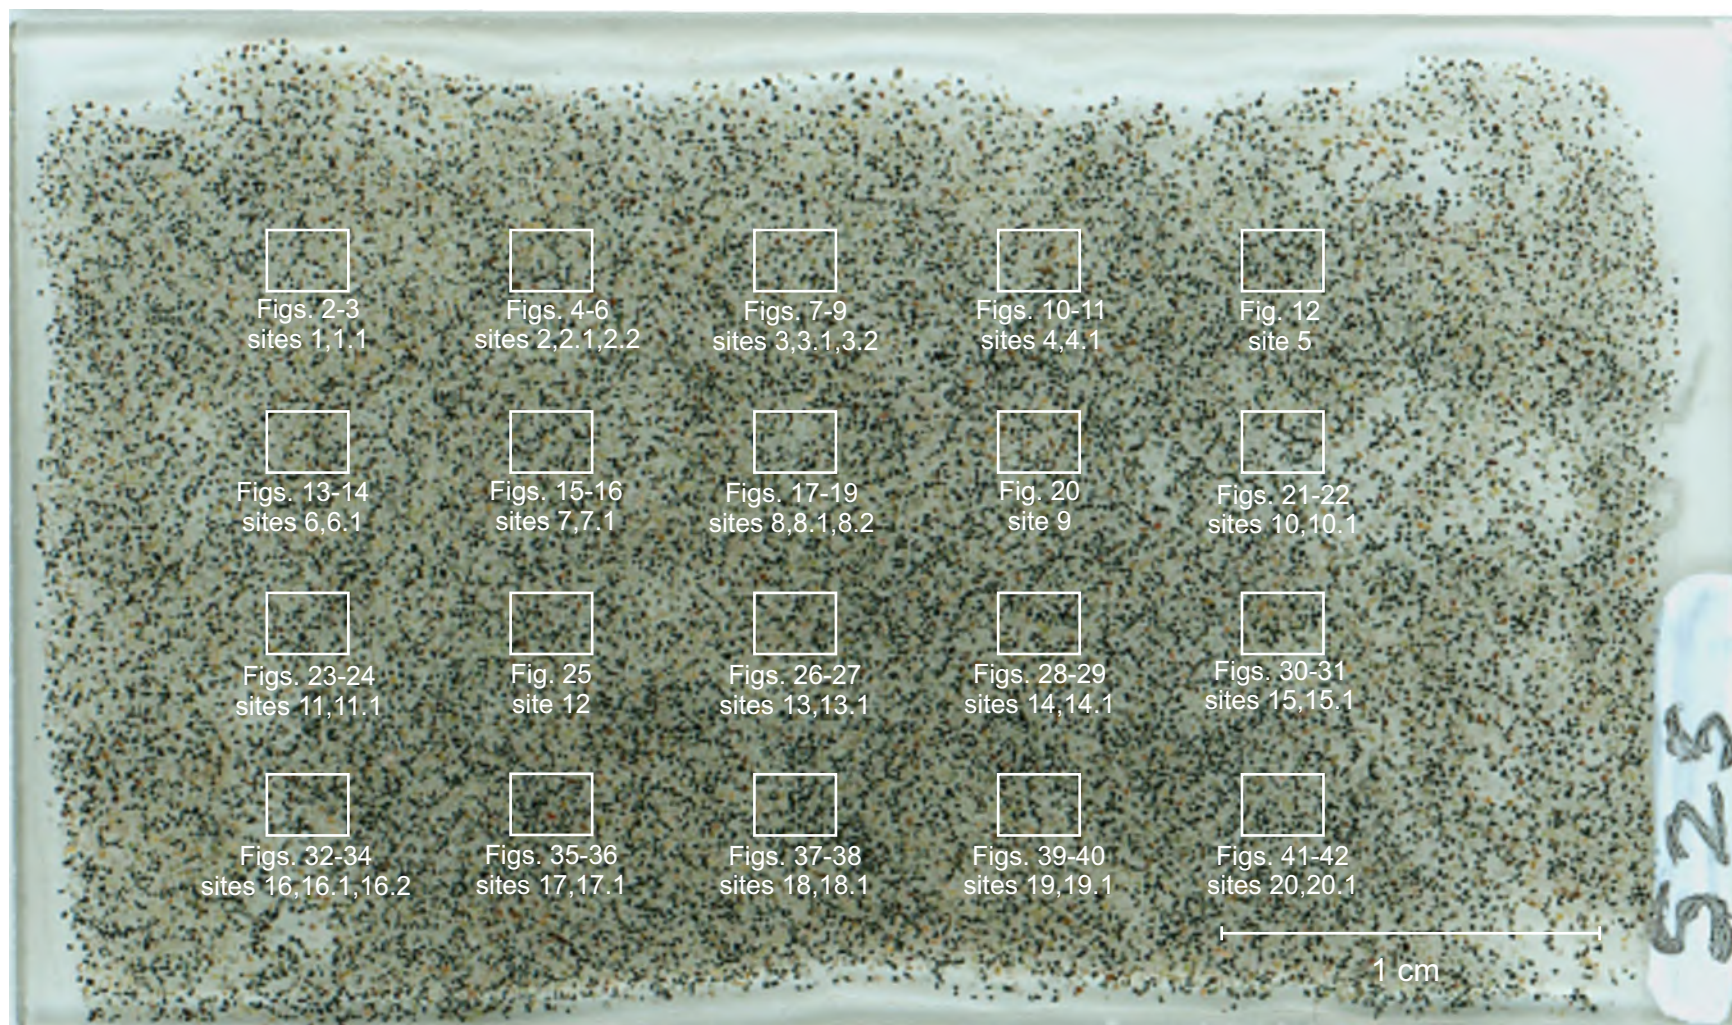

Figure B13.1: Sample S25



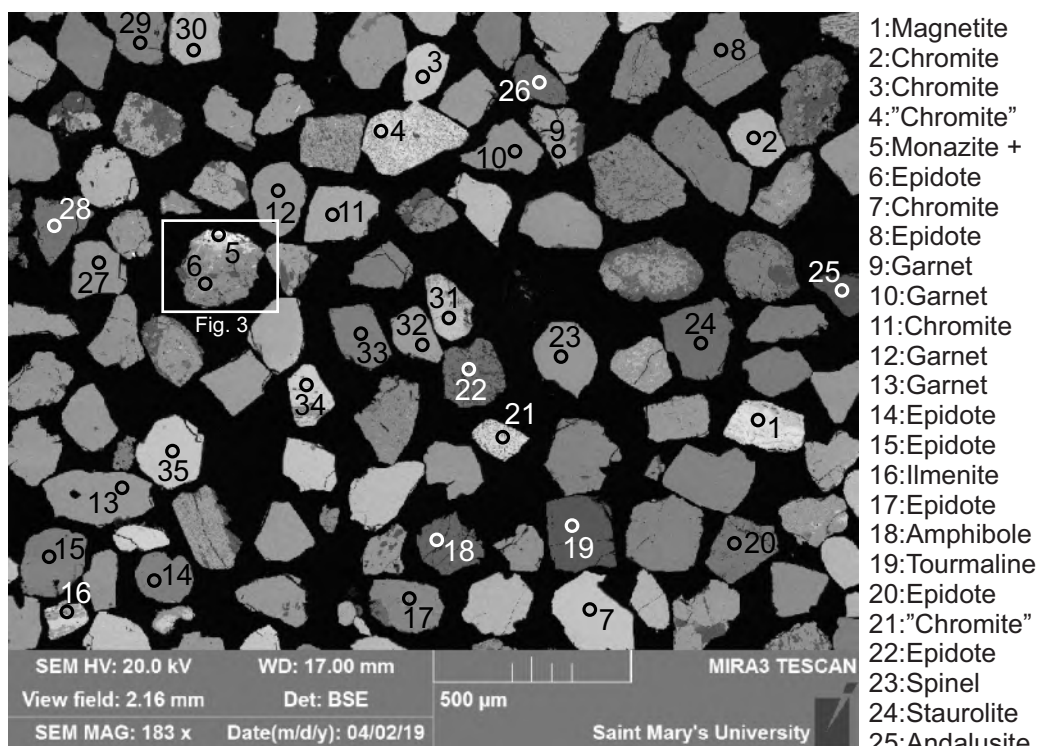

- 1:Magnetite
- 2:Chromite
- 3:Chromite
- 4:"Chromite"
- 5:Monazite +
- 6:Epidote
- 7:Chromite
- 8:Epidote
- 9:Garnet
- 10:Garnet
- 11:Chromite
- 12:Garnet
- 13:Garnet
- 14:Epidote
- 15:Epidote
- 16:Ilmenite
- 17:Epidote
- 18:Amphibole
- 19:Tourmaline
- 20:Epidote
- 21:"Chromite"
- 22:Epidote
- 23:Spinel
- 24:Staurolite
- 25:Andalusite
- 26:Epidote
- 27:Garnet
- 28:Clinopyroxene
- 29:Epidote
- 30:Chromite
- 31:Fe-oxide/hydroxide +
- 32:Titanite
- 33:Epidote
- 34:Ilmenite
- 35:Chromite

Figure B13.2: Sample S25 site 1 (SEM). The detrital minerals include:Fe-oxide, Ilm, Chr, Spl, Grt, Tur, And, St, Ep, Aln, Ttn, Cpx, Ap, Mnz, Qz.

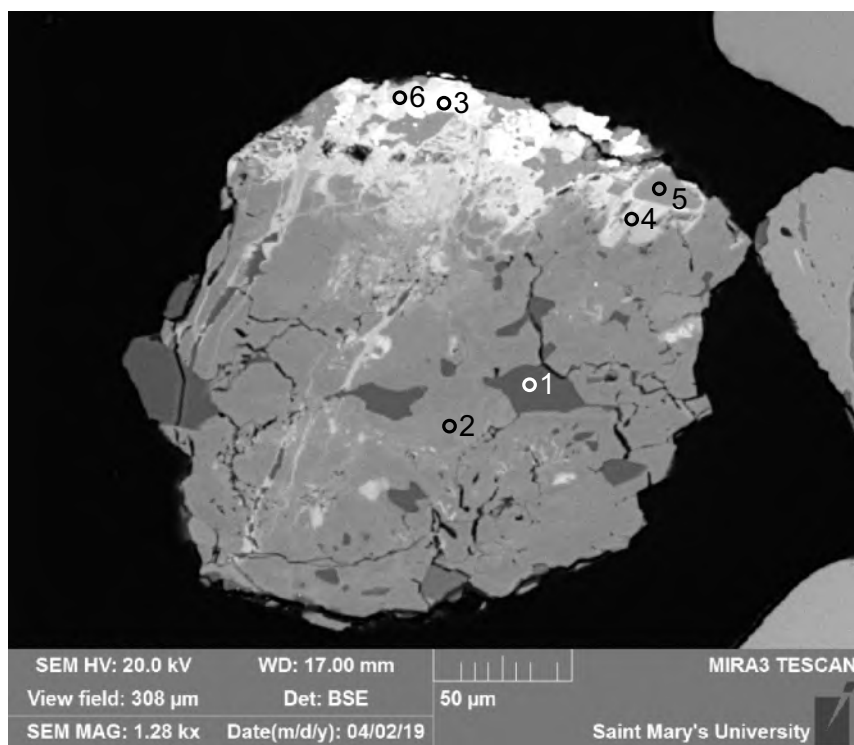

- 1:Quartz
- 2:Epidote
- 3:Monazite +
- 4:Allanite +
- 5:Apatite +
- 6:Allanite

Figure B13.3: Sample S25 site 1.1 (SEM). Detrital epidote grain with quartz and apatite inclusions, patches of allanite, and monazite. These two last minerals also appear to precipitate along fractures (based on their brightness). Hydrothermal.



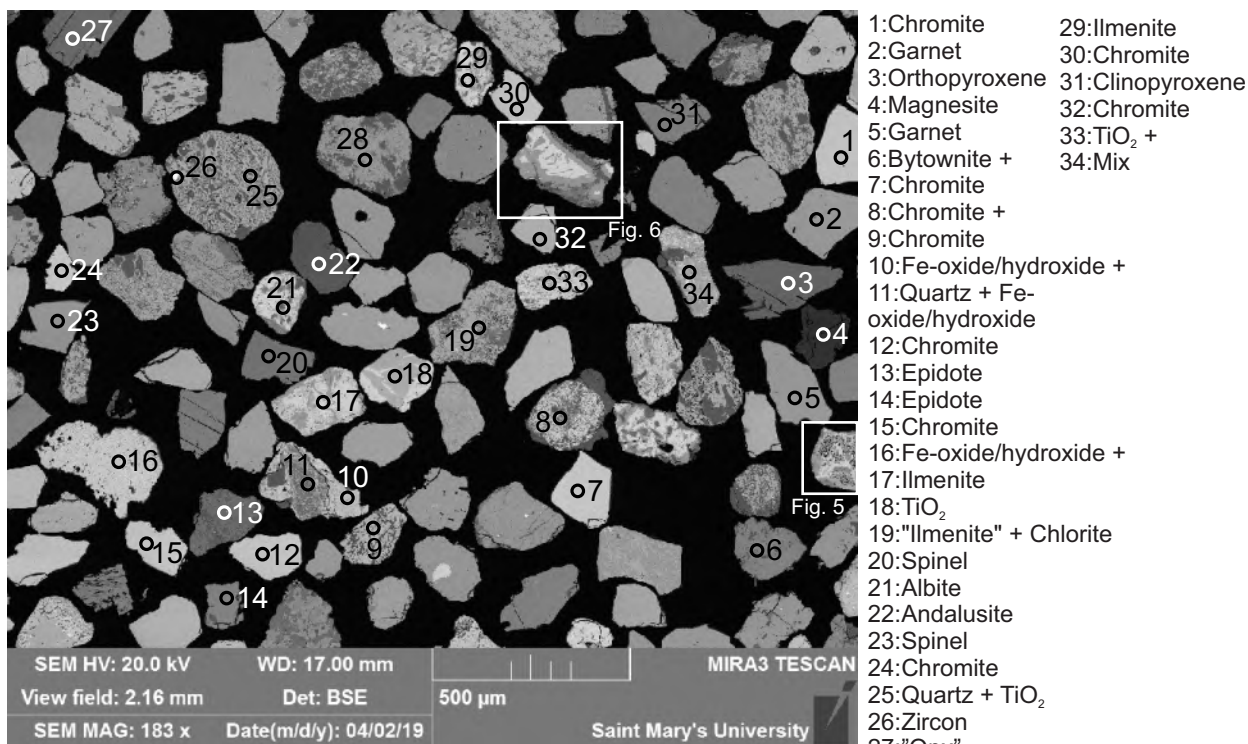

Figure B13.4: Sample S25 site 2 (SEM). The detrital minerals include: Feohy, Ilm, TiO<sub>2</sub>, Chr, Spl, Grt, And, Ep, Ttn, Zrn, Cpx, Opx, Pl (Ab, Byt), Qz, Chl and Mag.

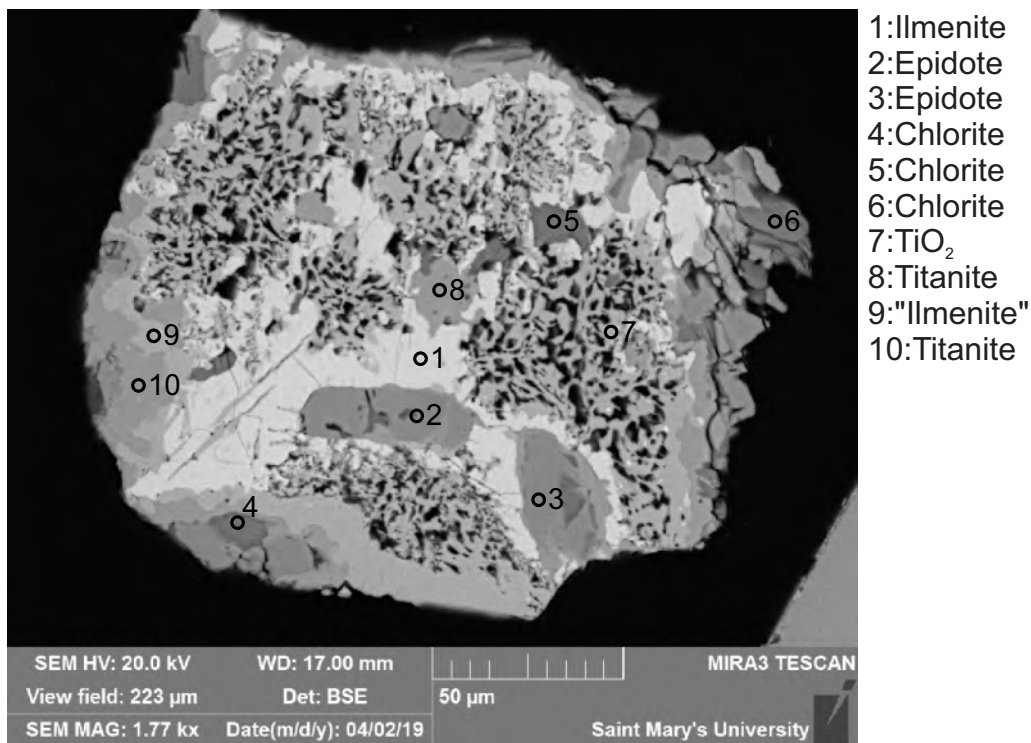

Figure B13.5: Sample S25 site 2.1 (SEM). An altered detrital ilmenite grain with epidote and chlorite inclusions. This ilmenite grain is partly replaced by TiO<sub>2</sub>, and titanite. Original metamorphic origin.

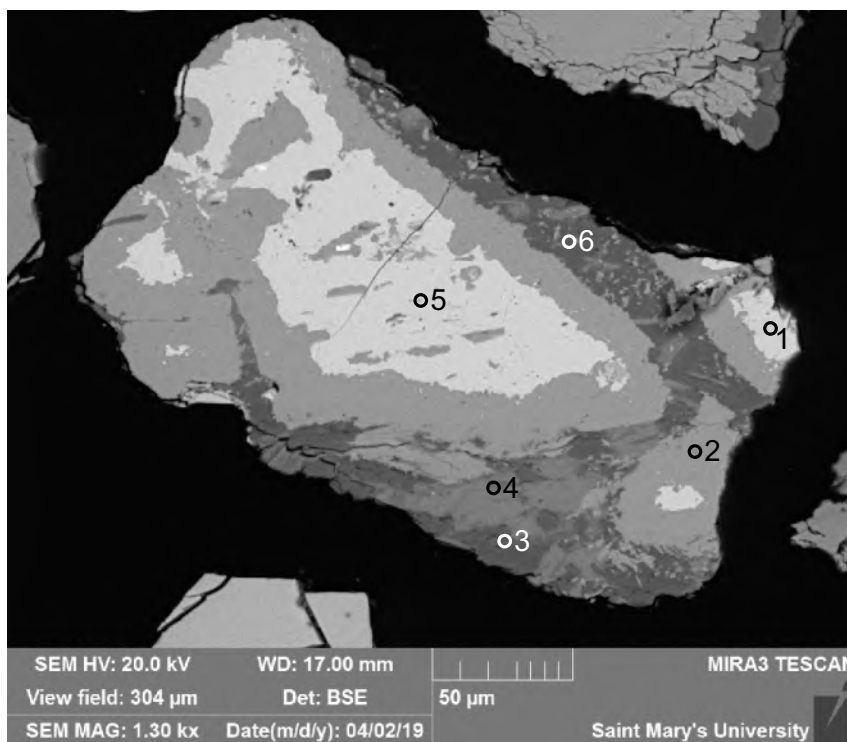

- 1:Ilmenite
- 2:Titanite
- 3:Albite
- 4:Chlorite
- 5:Ilmenite
- 6:Quartz +

Figure B13.6: Sample S25 site 2.2 (SEM). Lithic clast that is made up of fractured ilmenite, altered along the fractures to titanite, and with the fractures also filled with quartz and albite veins. Hydrothermal or deformed metamorphic.

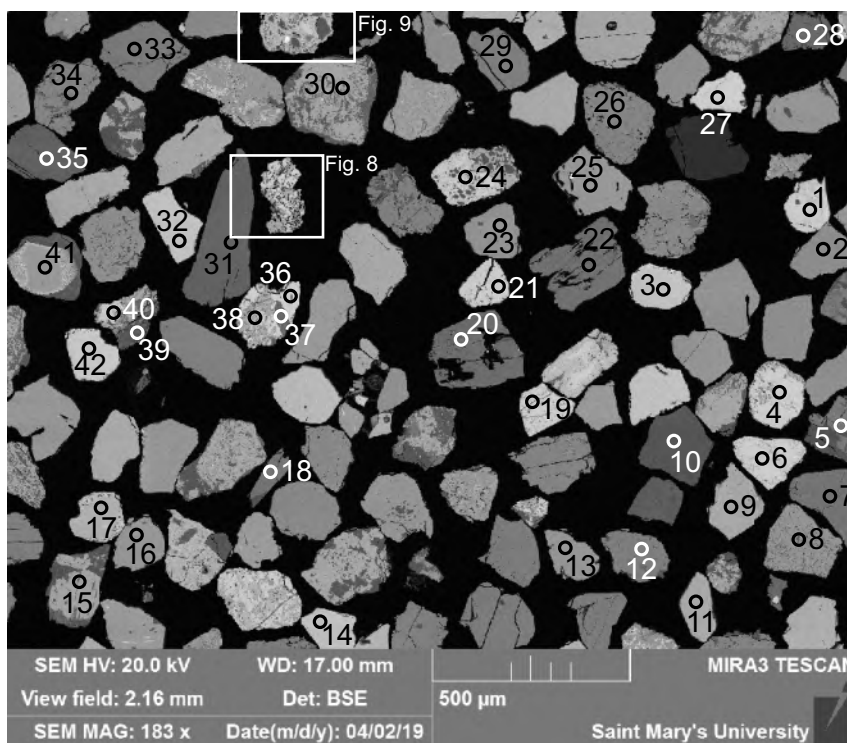

- 1:Ilmenite
- 2:Spinel
- 3:Chromite
- 4:Ilmenite
- 5:Staurolite
- 6:Ilmenite
- 7:Amphibole
- 8:Garnet
- 9:Chromite
- 10:Tourmaline
- 11:Chromite
- 12:Garnet
- 13:Garnet
- 14:Chromite
- 15:TiO<sub>2</sub>
- 16:Garnet
- 17:Chromite
- 18:Staurolite
- 19:Ilmenite
- 20:Amphibole
- 21:Ilmenite
- 22:Clinopyroxene
- 23:Garnet
- 24:"Ilmenite" +
- 25:Garnet
- 26:Epidote
- 27:Ilmenite
- 28:Epidote
- 29:Epidote
- 30:TiO<sub>2</sub> + Muscovite
- 31:Orthopyroxene
- 32:Chromite
- 33:Epidote
- 34:Epidote
- 35:Orthopyroxene
- 36:Ilmenite + Muscovite
- 37:Muscovite +
- 38:"Ilmenite" +
- 39:Albite
- 40:Ilmenite
- 41:Spinel
- 42:Chromite

Figure B13.7: Sample S25 site 3 (SEM). The detrital minerals include: Ilm, TiO<sub>2</sub>, Chr, Spl, Grt, Tur, And, St, Ep, Zrn, Cpx, Opx, Pl (Ab), Ms, Amph and Act.

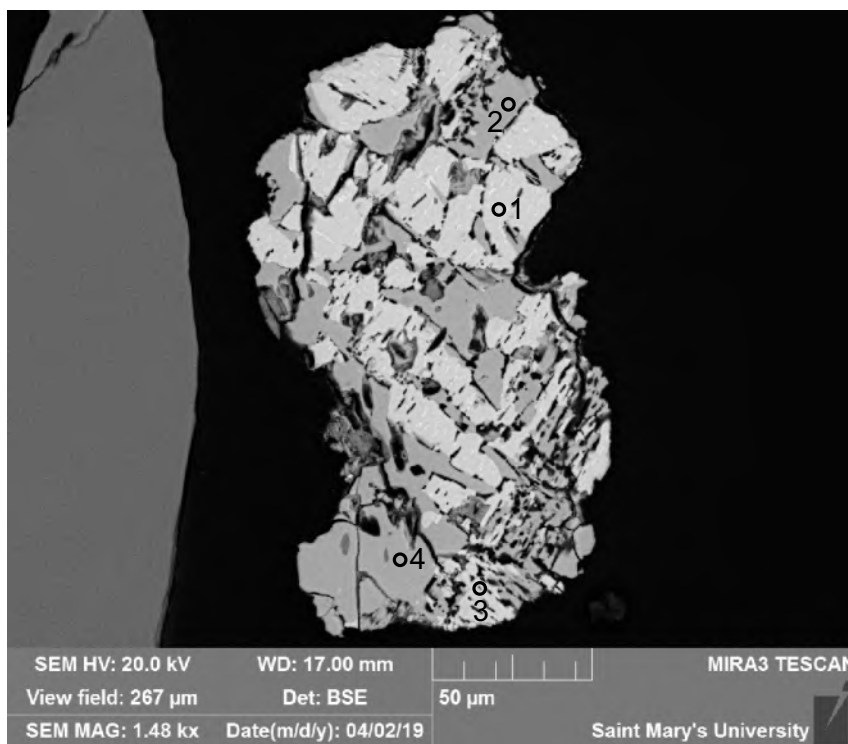

- 1: Ilmenite
- 2:  $\text{TiO}_2$
- 3: Ilmenite
- 4:  $\text{TiO}_2$

Figure B13.8: Sample S25 site 3.1 (SEM). A detrital ilmenite grain partly altered to  $\text{TiO}_2$ .

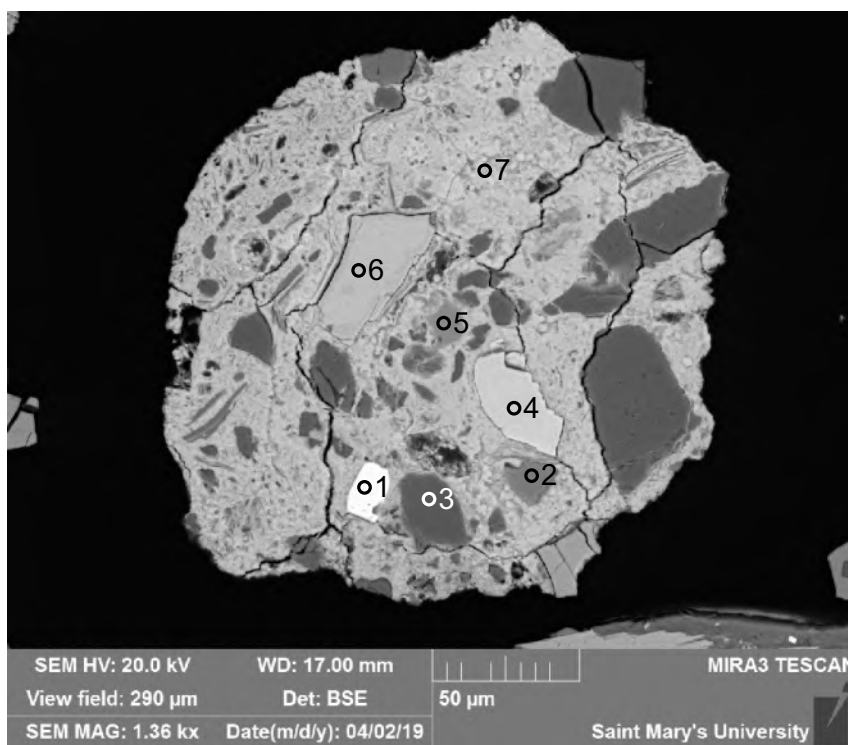

- 1: Zircon
- 2: Epidote
- 3: Quartz
- 4: "Chromite"
- 5: Epidote
- 6: Chromite
- 7: Fe-oxide/hydroxide +

Figure B13.9: Sample S25 site 3.2 (SEM). Limonite cemented sandstone or pedogenic aggregate made up of chromite and (altered chromite), epidote, and zircon, all cemented with Fe-oxide/hydroxide and clays.



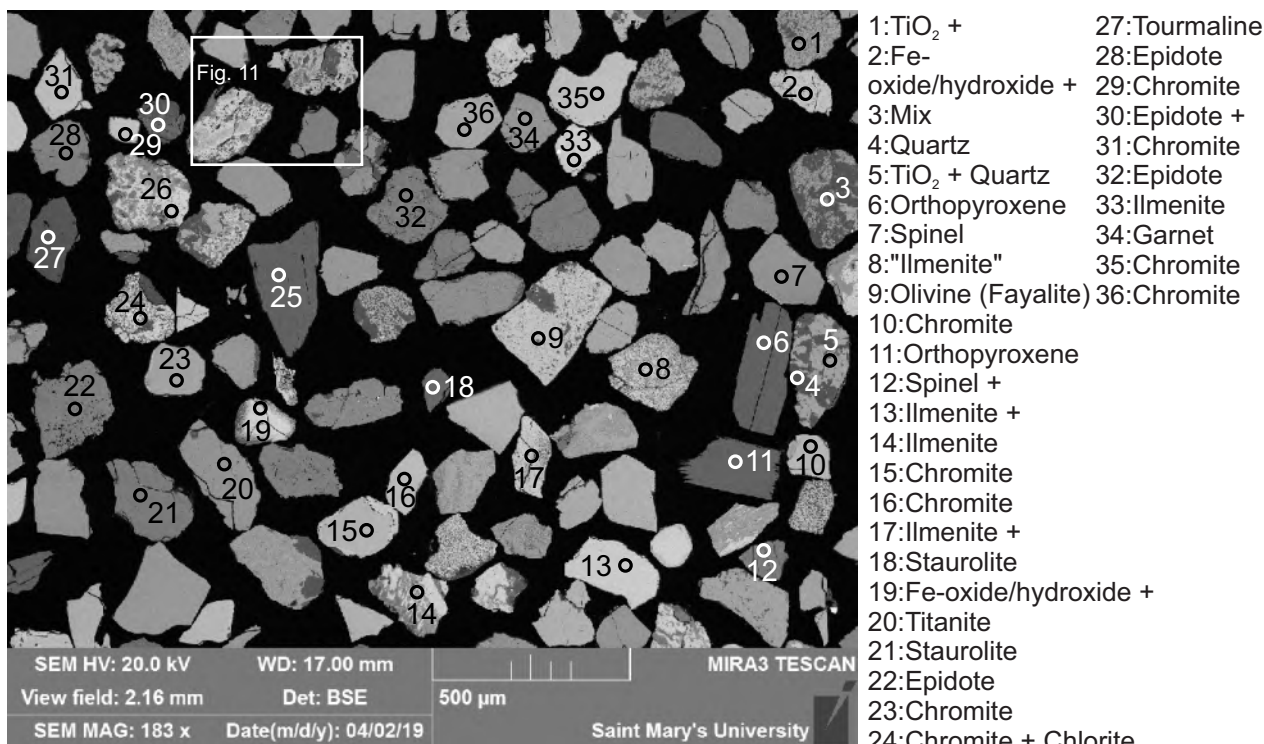

Figure B13.10: Sample S25 site 4 (SEM). The detrital minerals include: Ilm, TiO<sub>2</sub>, Chr, Spl, Grt, Tur, St, Ep, Ttn, Opx, Ol, Pl (Ab), Qz and Chl.

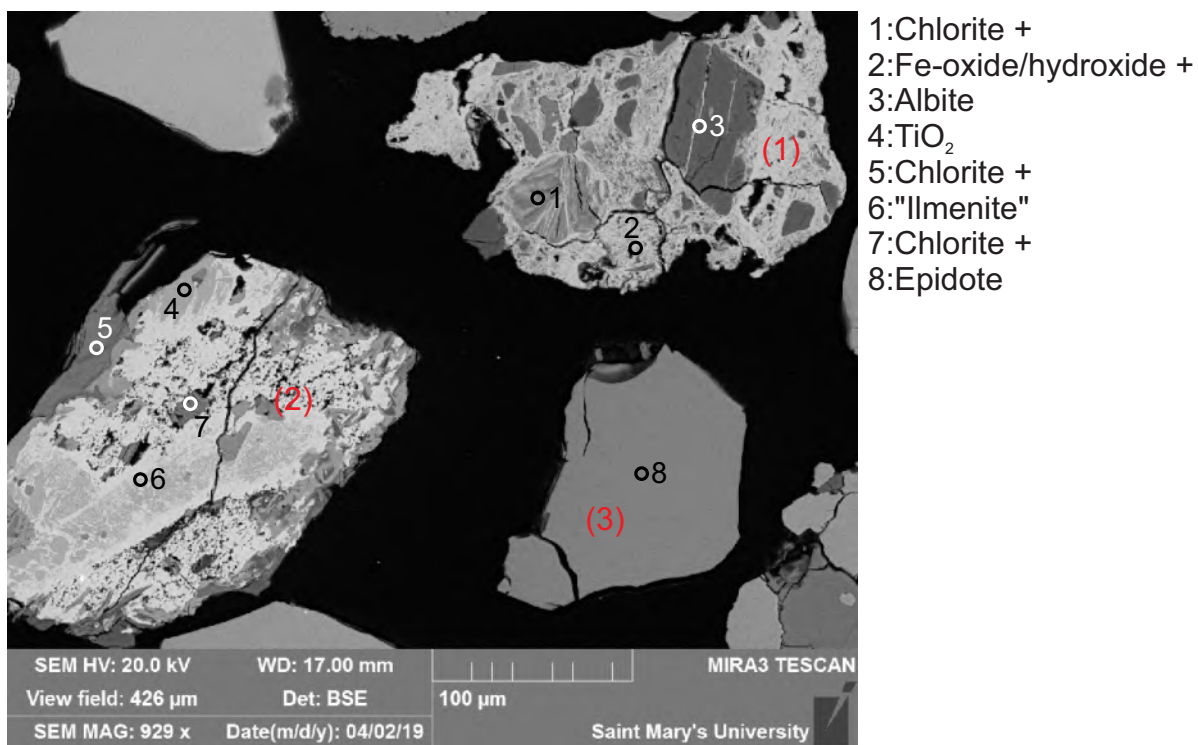

Figure B13.11: Sample S25 site 4.1 (SEM). 1: Sandstone or pedogenic aggregate made up of chlorite and albite cemented with Fe-oxide/hydroxide and clays. 2: Probably a lithic clast of ilmenite altered to TiO<sub>2</sub> in a chloritic schist. 3: A detrital epidote grain.

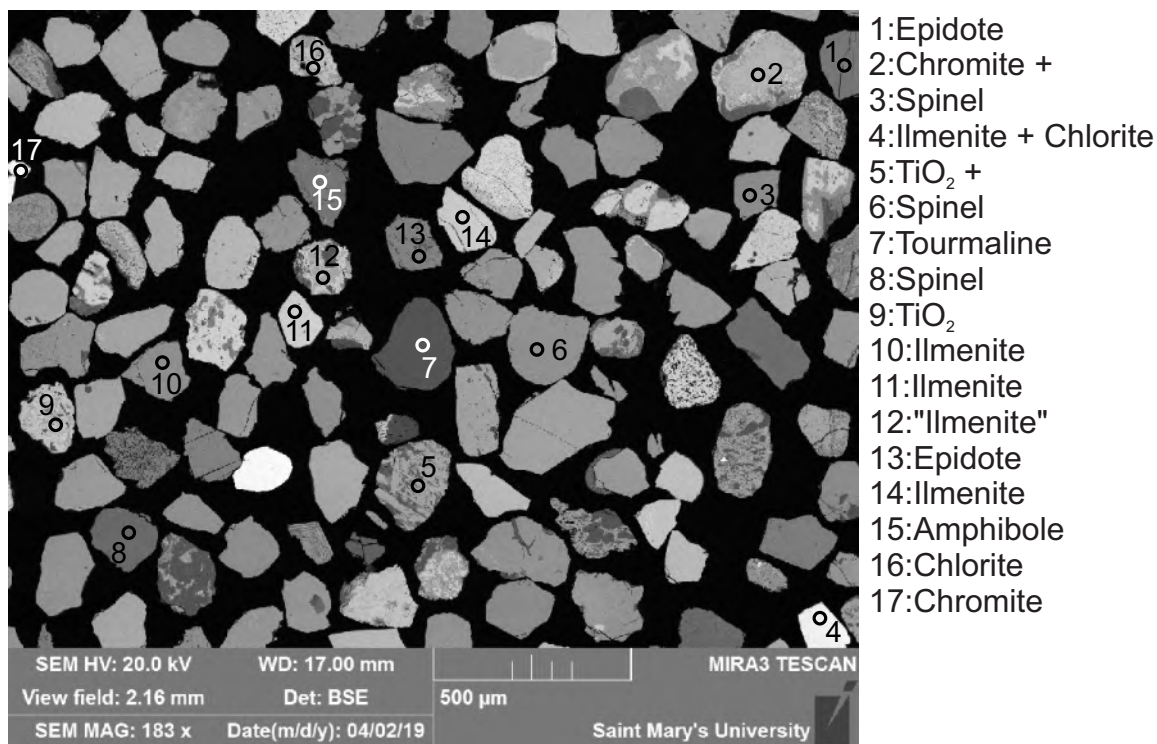

Figure B13.12: Sample S25 site 5 (SEM). The detrital minerals include: Ilm, TiO<sub>2</sub>, Chr, Spl, Tur, Ep, Chl. The TiO<sub>2</sub> minerals may be products of ilmenite alteration.

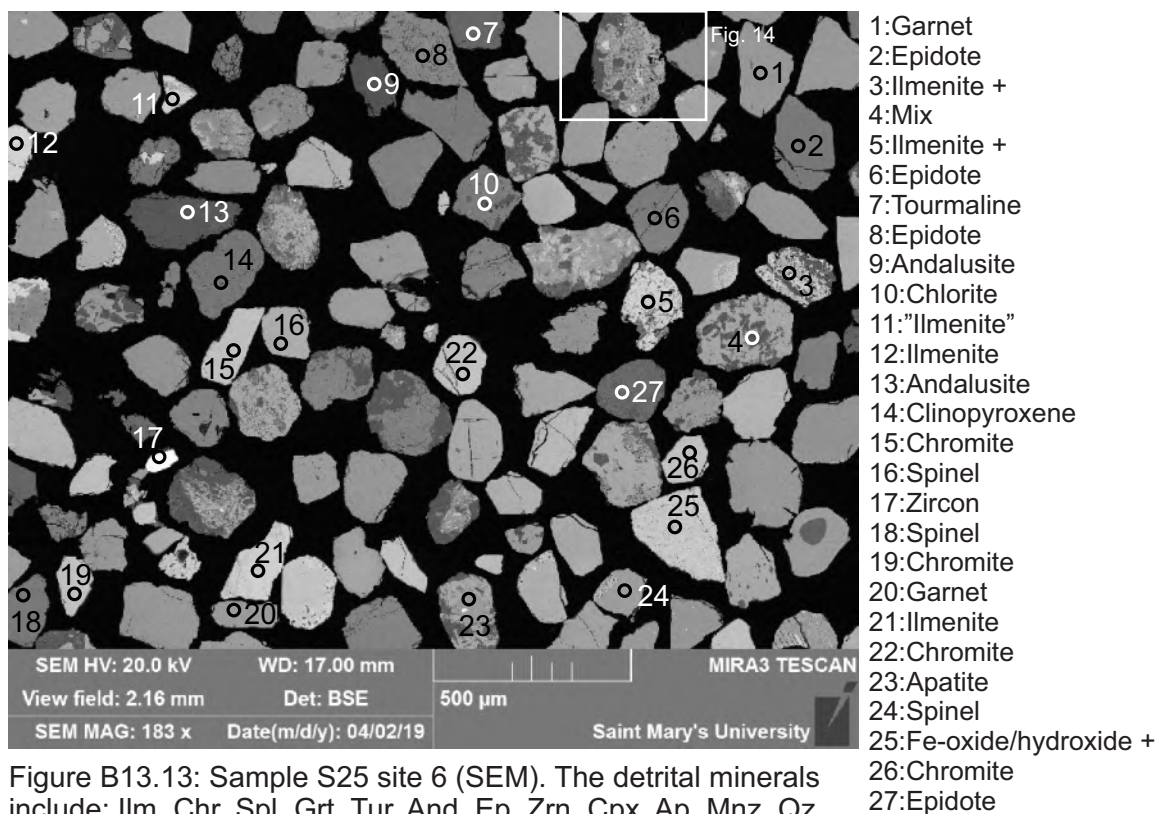

Figure B13.13: Sample S25 site 6 (SEM). The detrital minerals include: Ilm, Chr, Spl, Grt, Tur, And, Ep, Zrn, Cpx, Ap, Mnz, Qz and Chl. Ilmenite is partly altered to TiO<sub>2</sub>. Detrital Fe-oxide may be present (25).



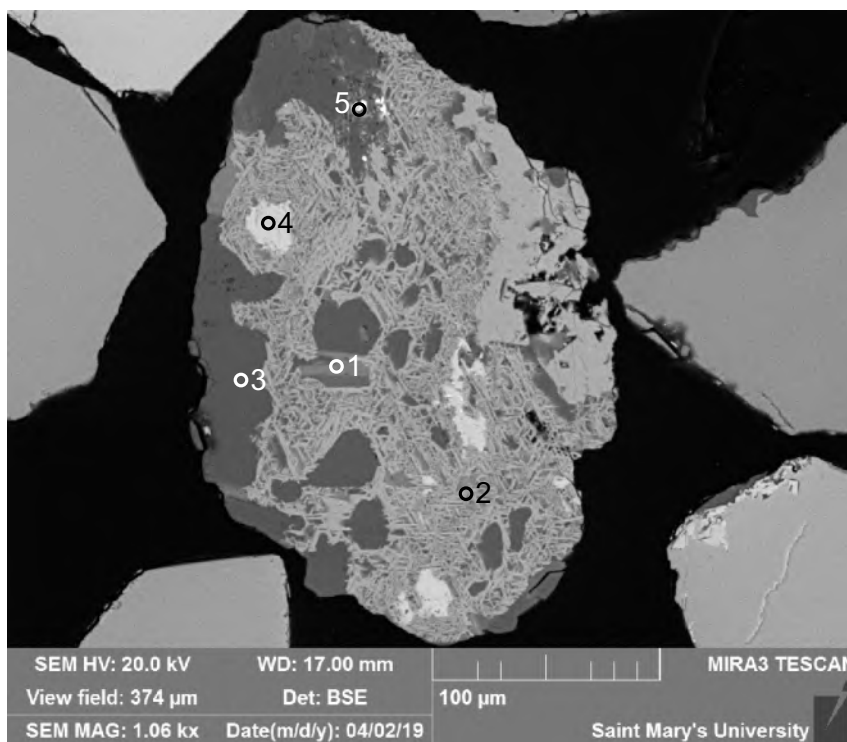

- 1:Chlorite
- 2:TiO<sub>2</sub> + Quartz
- 3:Quartz
- 4:Ilmenite
- 5:Monazite +

Figure B13.14: Sample S25 site 6.1 (SEM). Detrital grain of ilmenite with quartz inclusions, altered to TiO<sub>2</sub>. Additional minerals include chlorite and monazite, metamorphic.

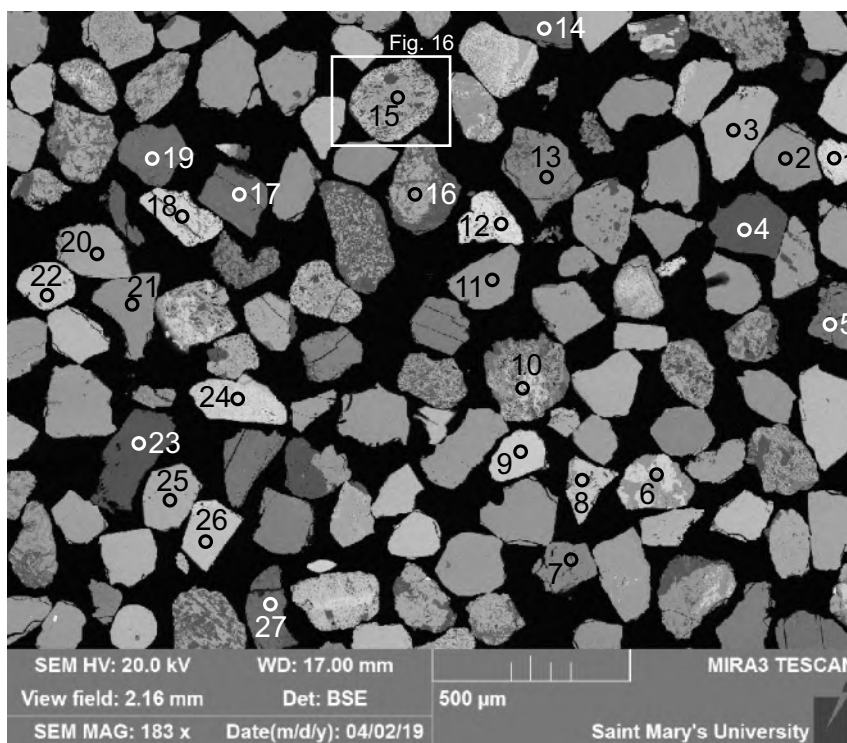

- 1:"Chromite"
- 2:Spinel
- 3:Chromite
- 4:Tourmaline
- 5:Epidote
- 6:Titanite
- 7:Epidote
- 8:Fe-oxide/hydroxide +
- 9:Chromite
- 10:"Ilmenite" +
- 11:Garnet
- 12:Fe-oxide/hydroxide +
- 13:Epidote
- 14:Orthopyroxene
- 15:Spinel
- 16:TiO<sub>2</sub> +
- 17:Albite +
- 18:Ilmenite
- 19:Staurolite
- 20:Chromite
- 21:Spinel
- 22:Chromite
- 23:Andalusite
- 24:"Chromite"
- 25:Chromite
- 26:Chromite
- 27:Epidote +

Figure B13.15: Sample S25 site 7 (SEM). The detrital minerals include: Ilm (often partly altered), Chr, (altered Chr), Spl, Grt, Tur, And, St, Ep, Ttn, Opx, Ab, Chl, and probably Feohy.

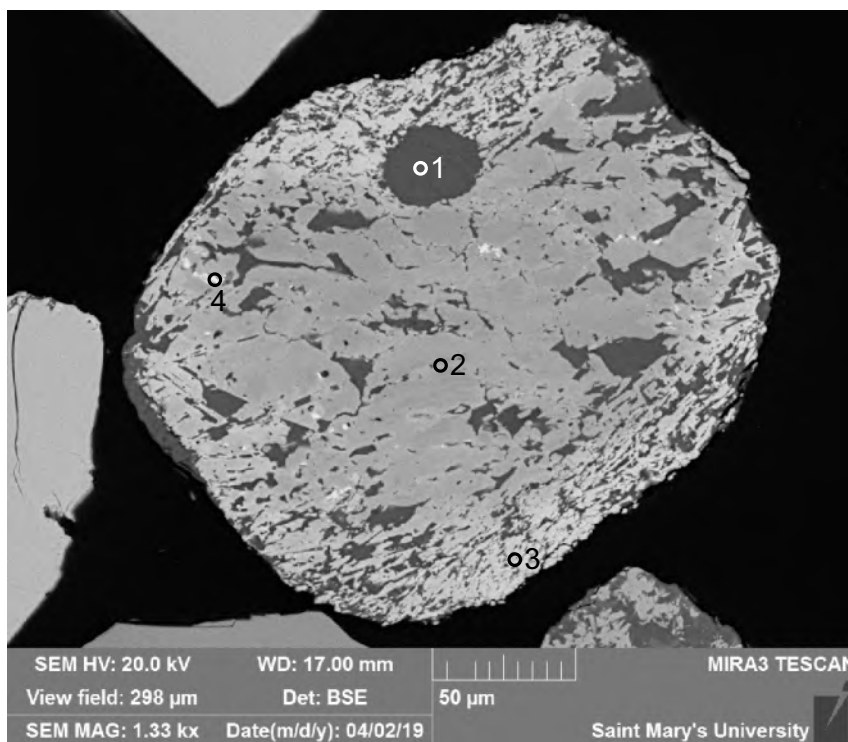

- 1:Chlorite
- 2:Spinel
- 3:Chromite + Chlorite
- 4:"Chromite"

Figure B13.16: Sample S25 site 7.1 (SEM). Probably a spinel - chromite grain altered to altered chromite and chlorite. Typical alteration pattern for metamorphic alteration of the Vourinos ophiolite (G. Grece and A. Merlini, 2011).

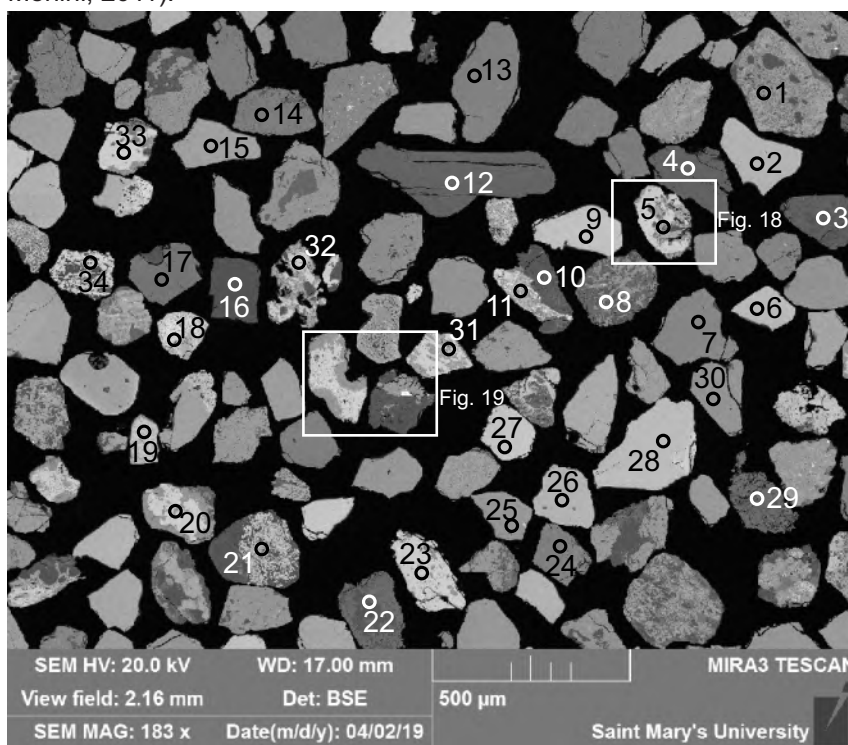

- 1:TiO<sub>2</sub> + Quartz
- 2:Chromite
- 3:Quartz +
- 4:Orthopyroxene
- 5:Mix
- 6:Chromite
- 7:Spinel
- 8:Oligoclase + TiO<sub>2</sub>
- 9:Chromite
- 10:Albite
- 11:TiO<sub>2</sub> + Chlorite
- 12:Orthopyroxene
- 13:Epidote
- 14:Garnet
- 15:Spinel
- 16:Andalusite
- 17:Staurolite
- 18:"Chromite"
- 19:Ilmenite
- 20:Titanite
- 21:Chromite + Chlorite
- 22:Albite
- 23:Ilmenite
- 24:Epidote
- 25:Garnet
- 26:Chromite
- 27:Chromite
- 28:Chromite
- 29:Epidote
- 30:Garnet
- 31:Titanite
- 32:"Ilmenite" +
- 33:Ilmenite
- 34:Chromite + Chlorite

Figure B13.17: Sample S25 site 8 (SEM). The detrital minerals include: Ilm, TiO<sub>2</sub>, Chr, Spl, Grt, And, St, Ep, Ttn, Zrn, Opx, Pl (Ab, Olig), Qz. Chromite and Ilmenite may be altered (21).

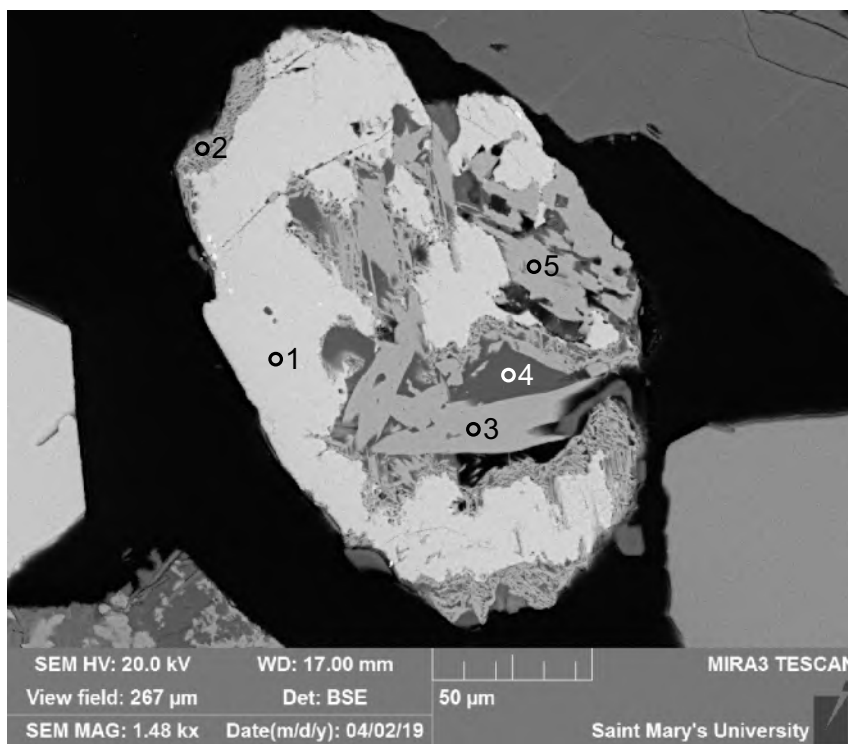

- 1: Ilmenite
- 2:  $\text{TiO}_2$  +
- 3:  $\text{TiO}_2$  +
- 4: Quartz
- 5:  $\text{TiO}_2$

Figure B13.18: Sample S25 site 8.1 (SEM). A lithic clast made up of ilmenite +  $\text{TiO}_2$  + quartz. ?schist, metamorphic.

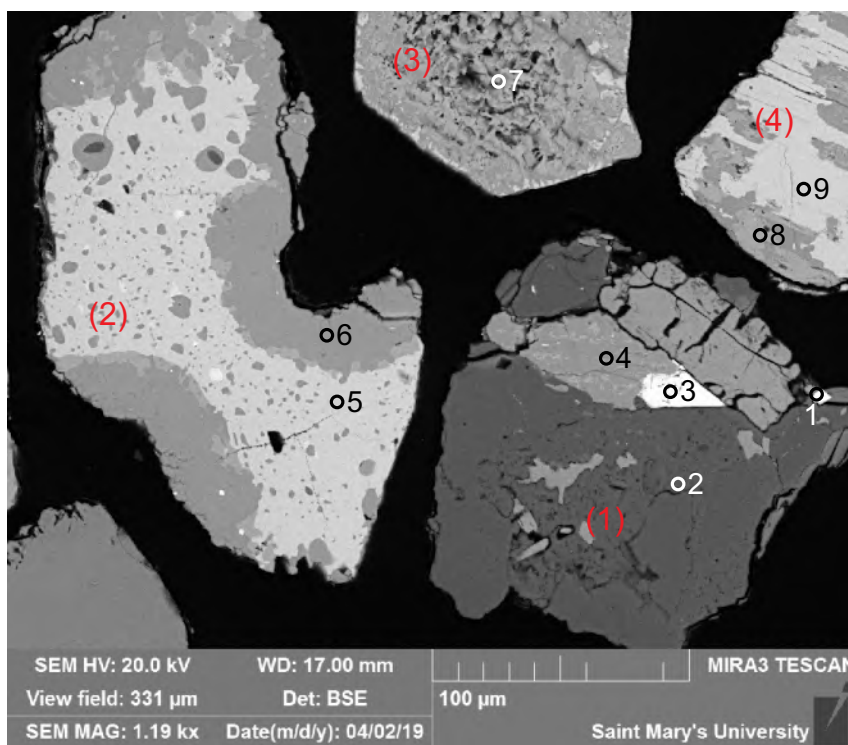

- 1: Zircon
- 2: Albite
- 3: Zircon
- 4:  $\text{TiO}_2$  +
- 5: Ilmenite
- 6: Titanite
- 7:  $\text{TiO}_2$
- 8:  $\text{TiO}_2$  +
- 9: Ilmenite

Figure B13.19: Sample S25 site 8.2 (SEM). 1: Detrital albite grain with inclusions of zircon and probably altered ilmenite/ $\text{TiO}_2$ , metamorphic. 2: An ilmenite grain altering to titanite, metamorphic or hydrothermal. 3: Probably an ilmenite grain completely altered to  $\text{TiO}_2$ . 4: Ilmenite partly altered to  $\text{TiO}_2$ .



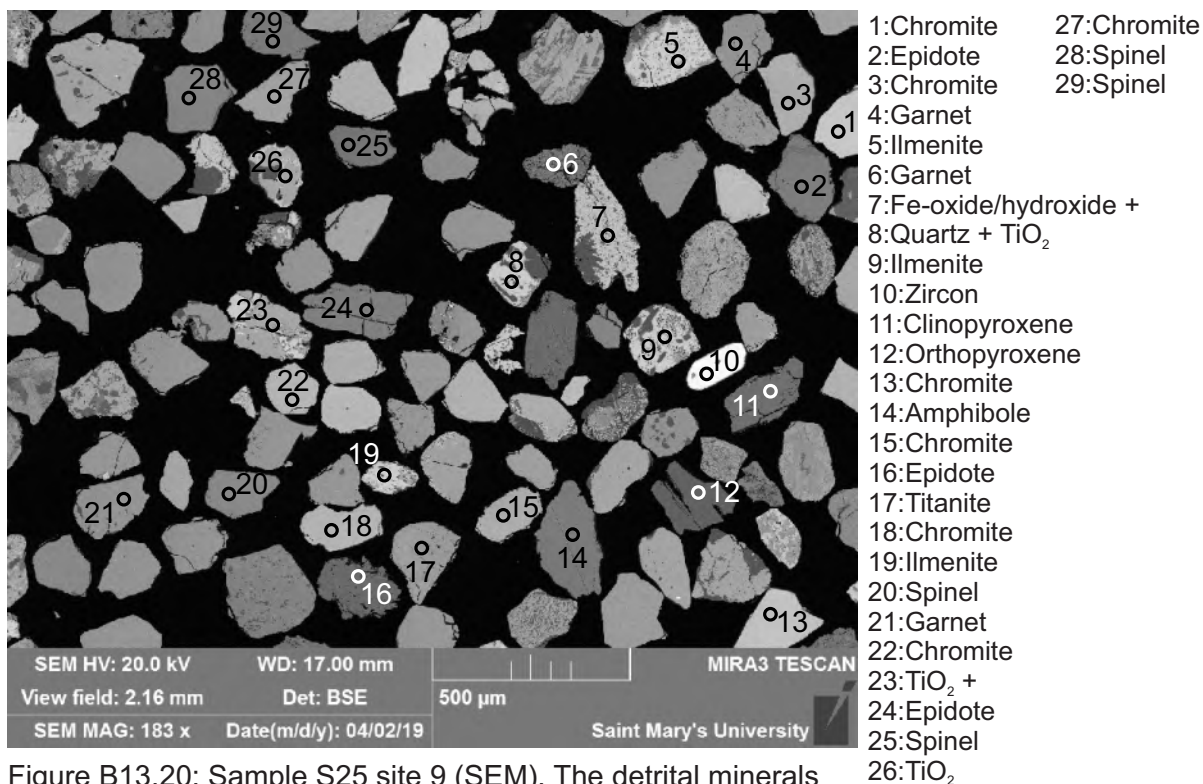

Figure B13.20: Sample S25 site 9 (SEM). The detrital minerals include: Ilm, TiO<sub>2</sub> (8,23), Chr, Spl, Grt, Ttn, Zrn, Cpx, Opx, Amph and probably Feohy.

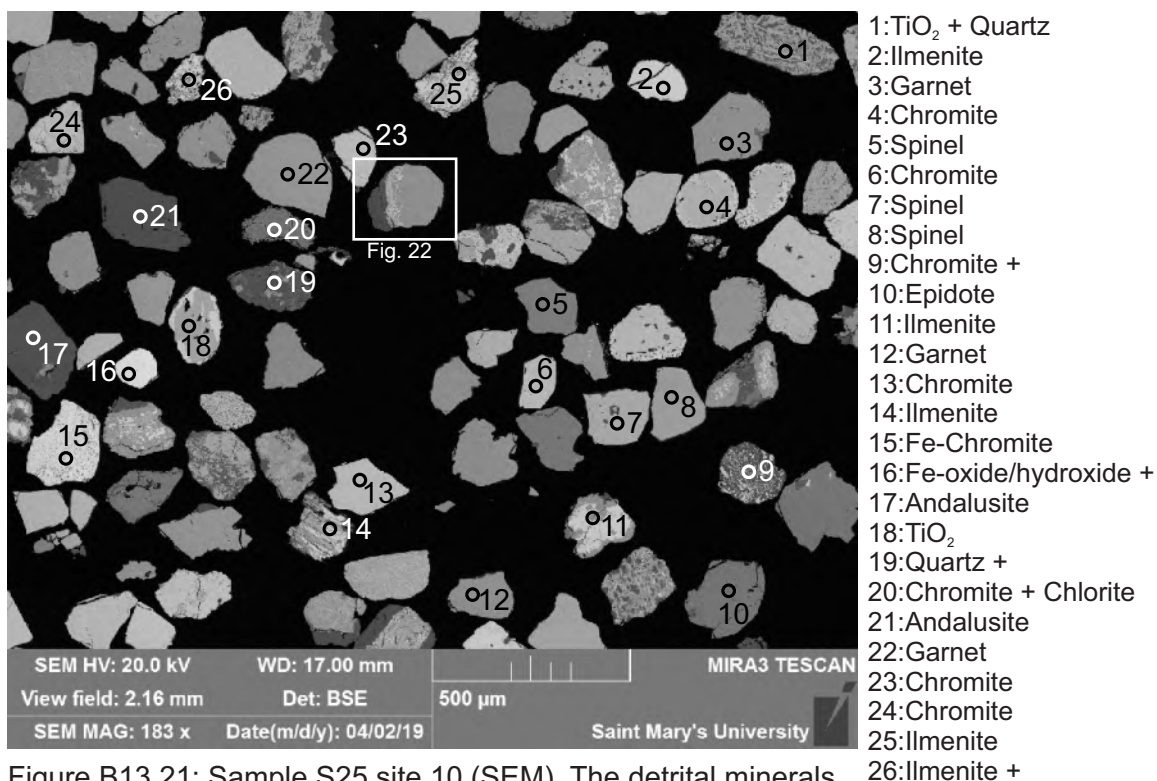

Figure B13.21: Sample S25 site 10 (SEM). The detrital minerals include: Feohy, Ilm, TiO<sub>2</sub>, Chr, Fe-Chr (altered chromite), Spl, Gt, And, Ep, Qz, Chl.

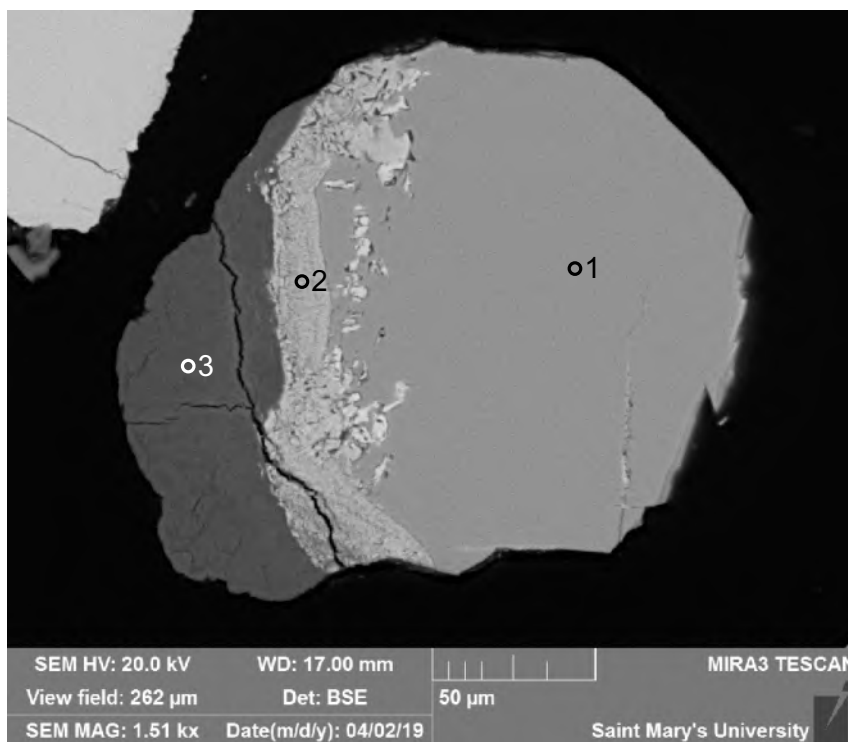

- 1: Spinel
- 2: Chlorite + Chromite
- 3: Chlorite

Figure B13.22: Sample S25 site 10.1 (SEM). Lithic clast made up of chlorite + spinel + chromite and chlorite. Ophiolite.

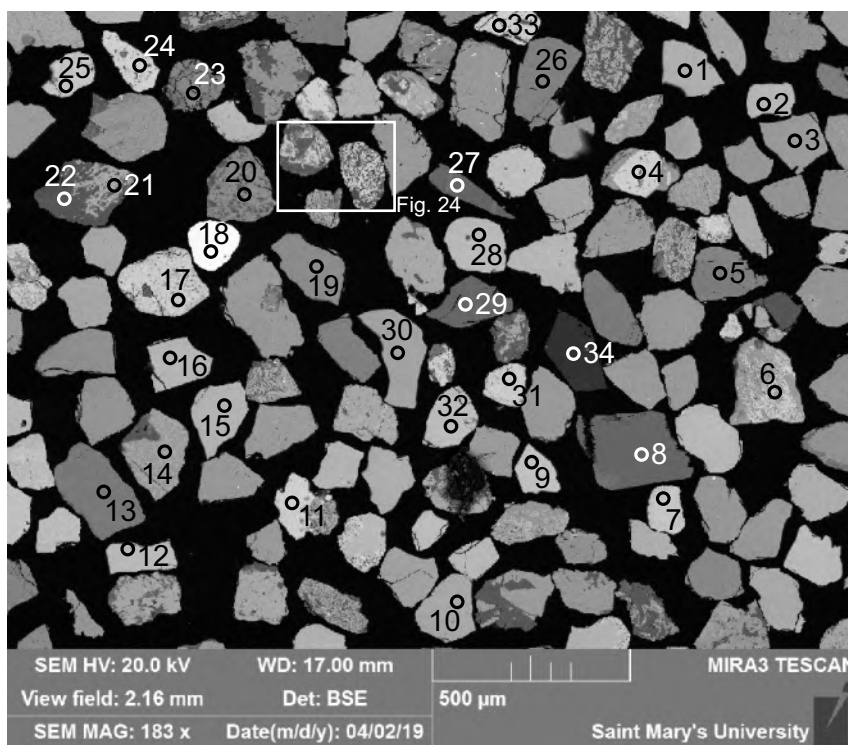

- 1: Chromite
- 2: Chromite
- 3: Garnet
- 4: Mix
- 5: Epidote
- 6: Titanite
- 7: "Chromite"
- 8: Orthopyroxene
- 9: Chromite
- 10:  $\text{TiO}_2$
- 11: Ilmenite
- 12: Chromite
- 13: Epidote
- 14: Titanite
- 15: Chromite
- 16: Chromite
- 17: Fe-oxide/hydroxide +
- 18: Zircon
- 19: Spinel
- 20: Apatite +
- 21:  $\text{TiO}_2$  +
- 22: Quartz
- 23: Epidote
- 24: Ilmenite
- 25: "Ilmenite"
- 26: Epidote
- 27: Orthopyroxene
- 28: Chromite
- 29: Orthopyroxene
- 30: Spinel
- 31: Fe-oxide/hydroxide +
- 32: Chromite
- 33: Ilmenite
- 34: Mg-oxide/hydroxide

Figure B13.23: Sample S25 site 11 (SEM). The detrital minerals include: Ilm,  $\text{TiO}_2$  (10), Chr, Spl, Grt, Ep, Ttn, Zrn, Opx, Pl (Ab), Ap, Ms, Qz, Chl. A grain of magnesite has been seen (34).



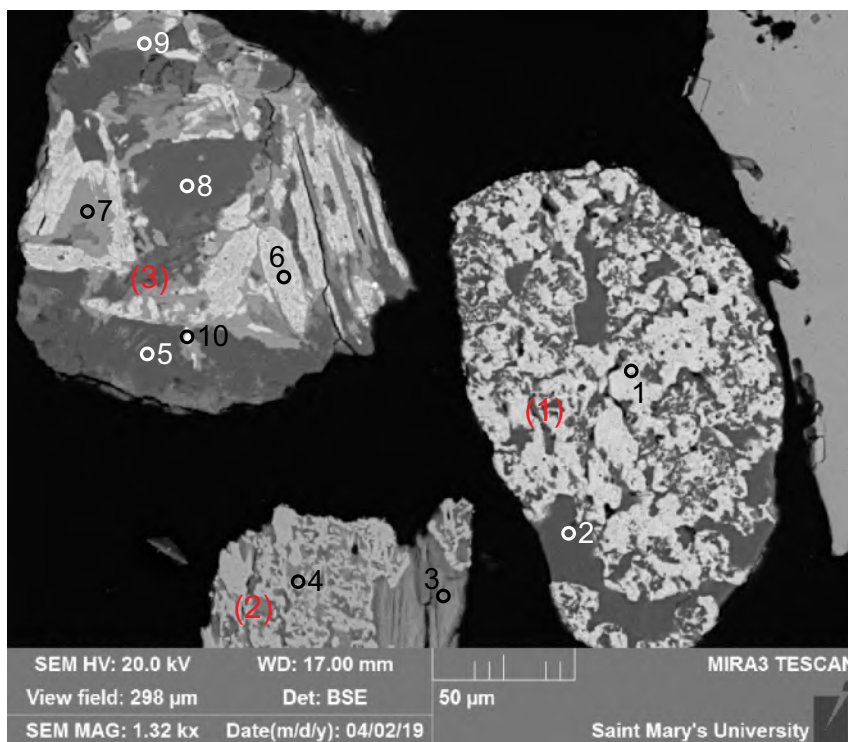

- 1:Chromite
- 2:Garnet
- 3:Chlorite + Muscovite
- 4:TiO<sub>2</sub> +
- 5:Quartz
- 6:"Ilmenite"
- 7:Titanite
- 8:Albite
- 9:Chlorite
- 10:Zircon +

Figure B13.24: Sample S25 site 11.1 (SEM). 1: Lithic clast (chromite and garnet, metaophiolite). 2: Lithic clast (muscovite + TiO<sub>2</sub>, metamorphic). 3: Lithic clast (quartz with zircon inclusion + ilmenite + titanite + chlorite + albite, metamorphic).

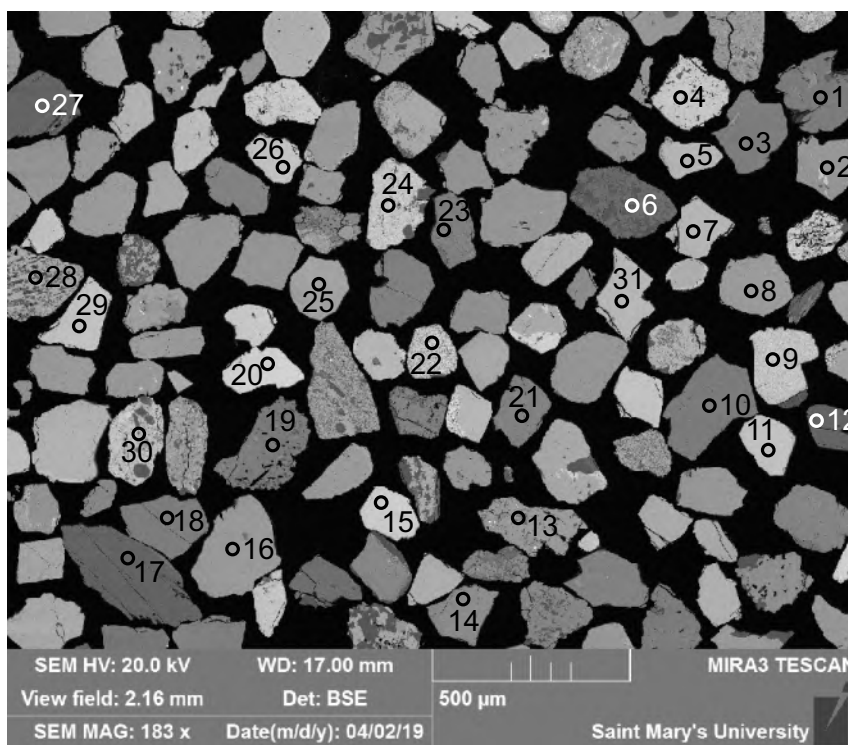

- 1:Epidote
- 2:Garnet
- 3:Epidote
- 4:Chromite +
- 5:"Ilmenite"
- 6:Epidote
- 7:Chromite
- 8:Garnet
- 9:Chromite +
- 10:Epidote
- 11:Chromite
- 12:Orthopyroxene
- 13:Garnet
- 14:Spinel
- 15:Chromite
- 16:Garnet
- 17:Orthopyroxene
- 18:Spinel
- 19:Epidote
- 20:Ilmenite
- 21:Epidote
- 22:Chromite + Chlorite
- 23:Spinel
- 24:Fe-oxide/hydroxide +
- 25:Spinel
- 26:"Chromite"
- 27:Orthopyroxene
- 28:Quartz +
- 29:Chromite
- 30:Fe-oxide/hydroxide + Chlorite
- 31:Chromite

Figure B13.25: Sample S25 site 12 (SEM). The detrital minerals include: Ilm, Chr, Spl, Grt, Ep, Opx, Qz and Chl.

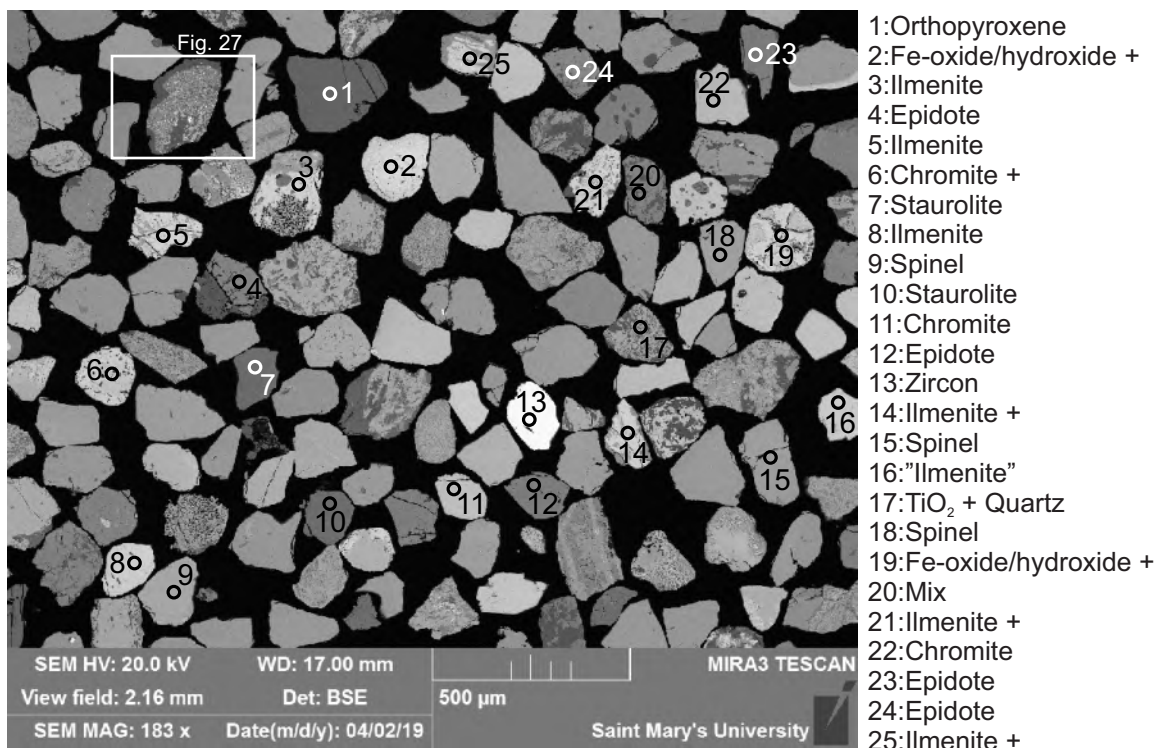

Figure B13.26: Sample S25 site 13 (SEM). The detrital minerals include: Ilm, Chr, Spl, Grt, St, Ep, Zrn, Opx and Qz.

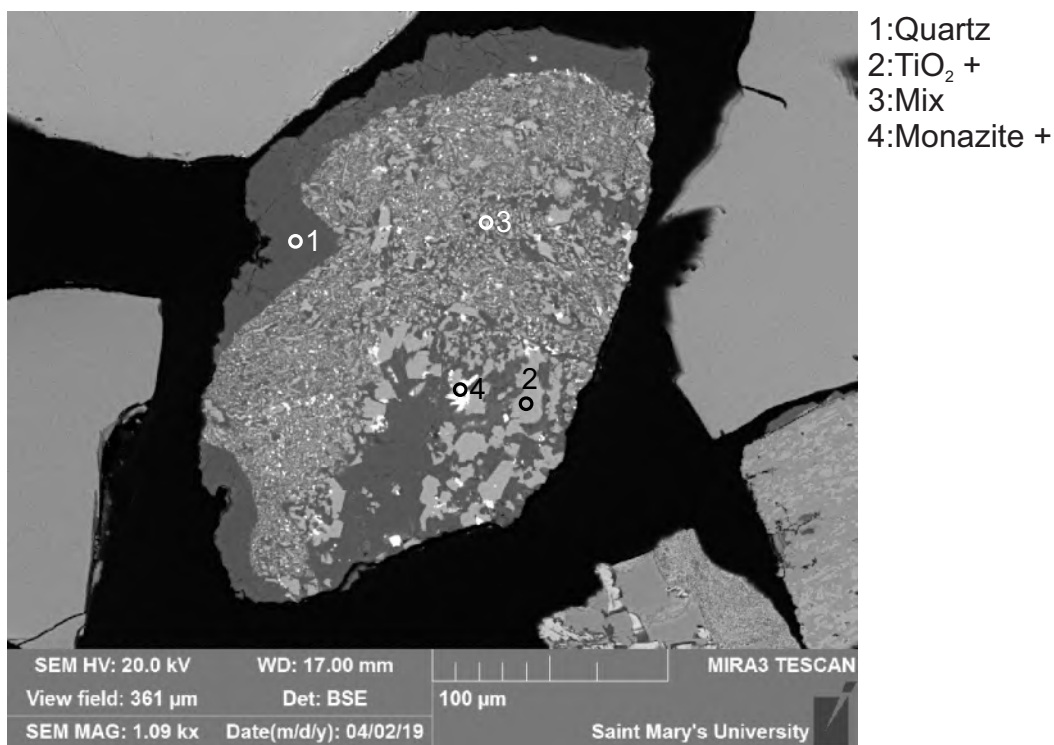

Figure B13.27: Sample S25 site 13.1 (SEM). Lithic clast made up of quartz + TiO<sub>2</sub> + late monazite. ?metamorphic.

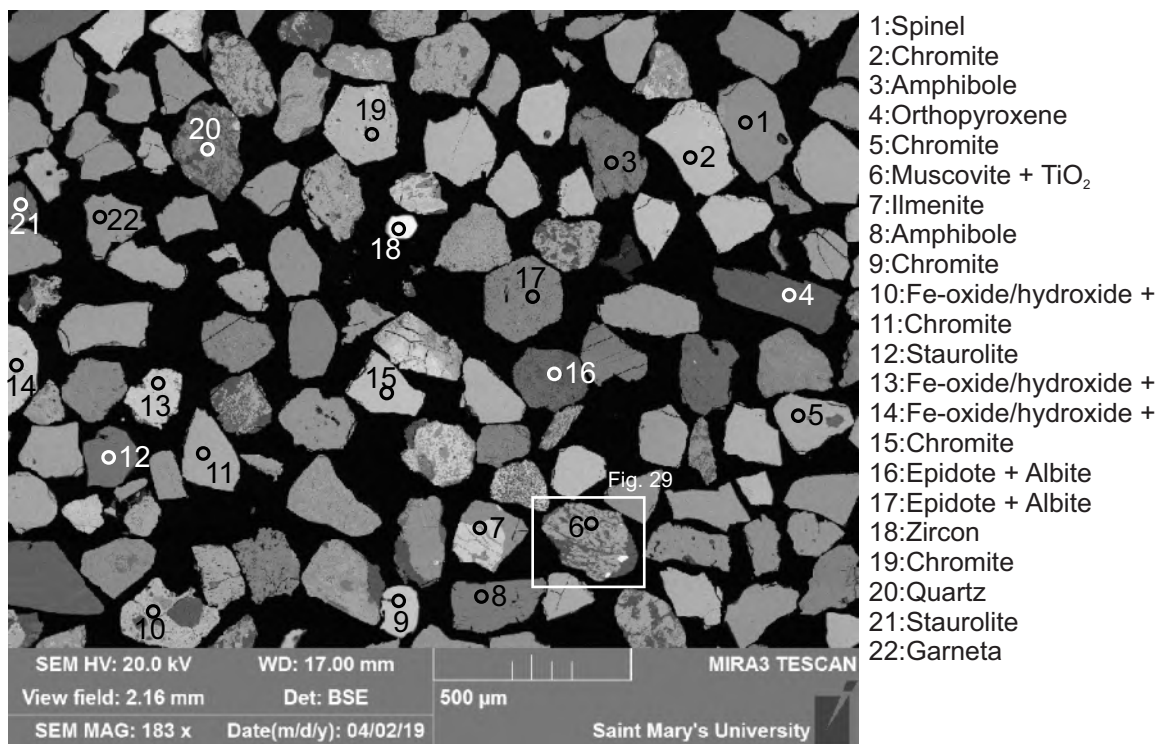

Figure B13.28: Sample S25 site 14 (SEM). The detrital minerals include: Ilm, TiO<sub>2</sub>, Chr, Spl, Grt, St, Ep, Zrn, Cpx, Opx, Amph, Ms, Qz and probably Feohy,

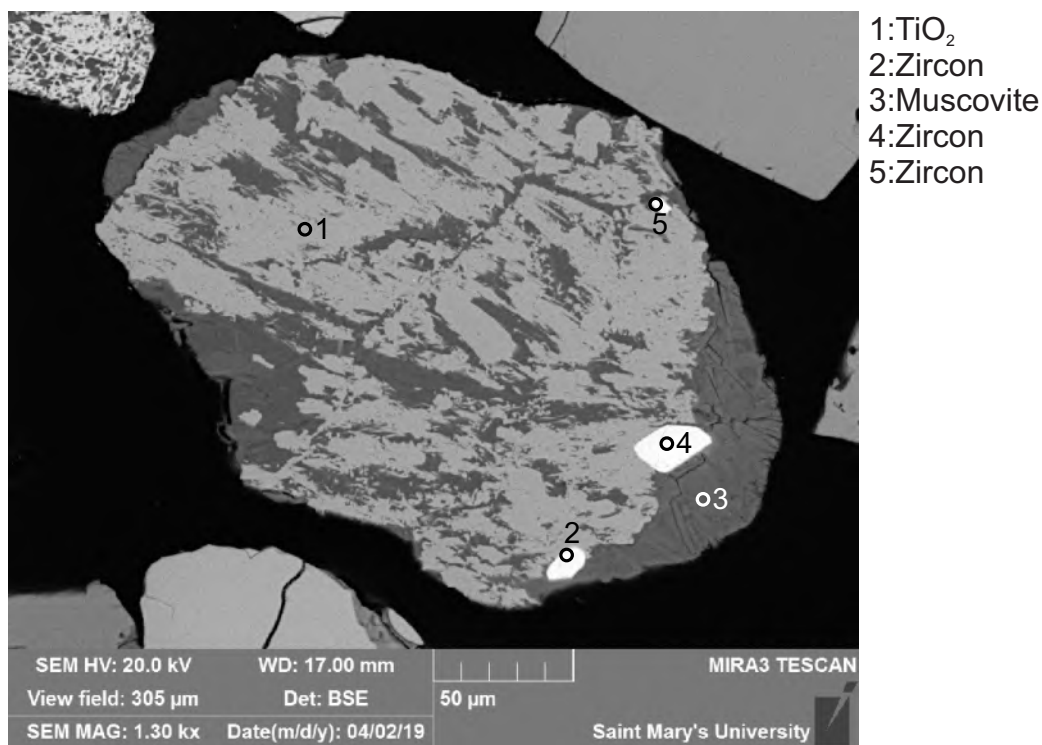

Figure B13.29: Sample S25 site 14.1 (SEM). A lithic clast made up of TiO<sub>2</sub> + muscovite + zircon. Metamorphic.



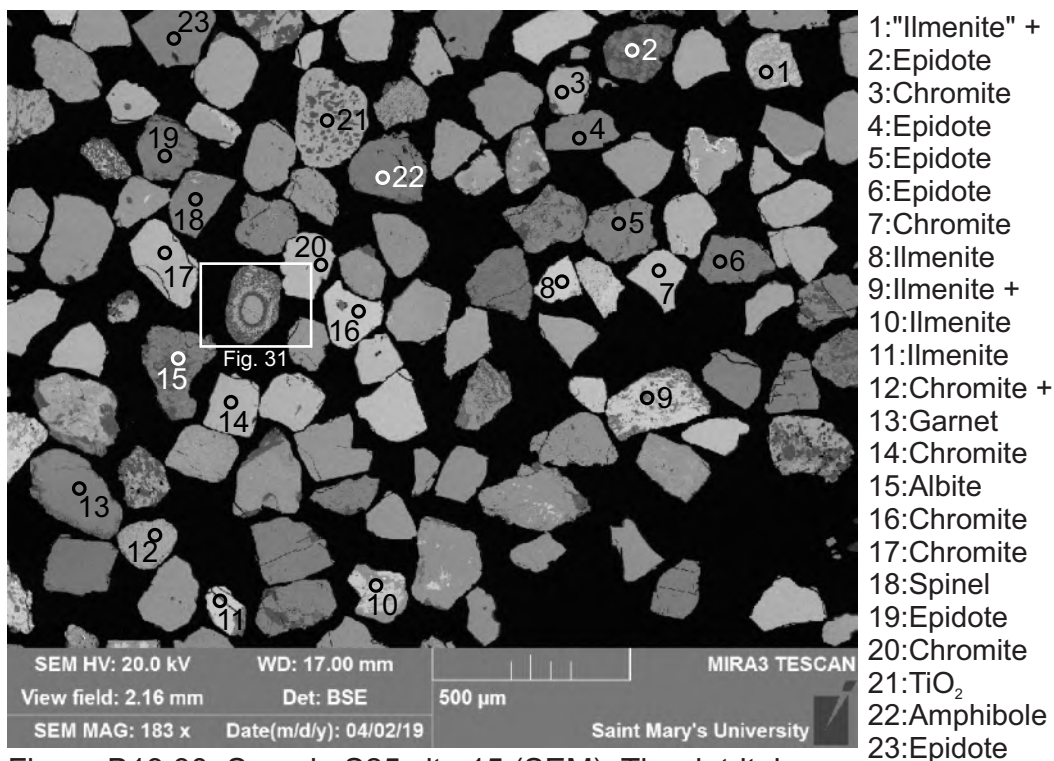

Figure B13.30: Sample S25 site 15 (SEM). The detrital minerals include: Ilm, TiO<sub>2</sub>, Chr, Spl, Grt, Ep, Pl (Ab), Amph, Chl.

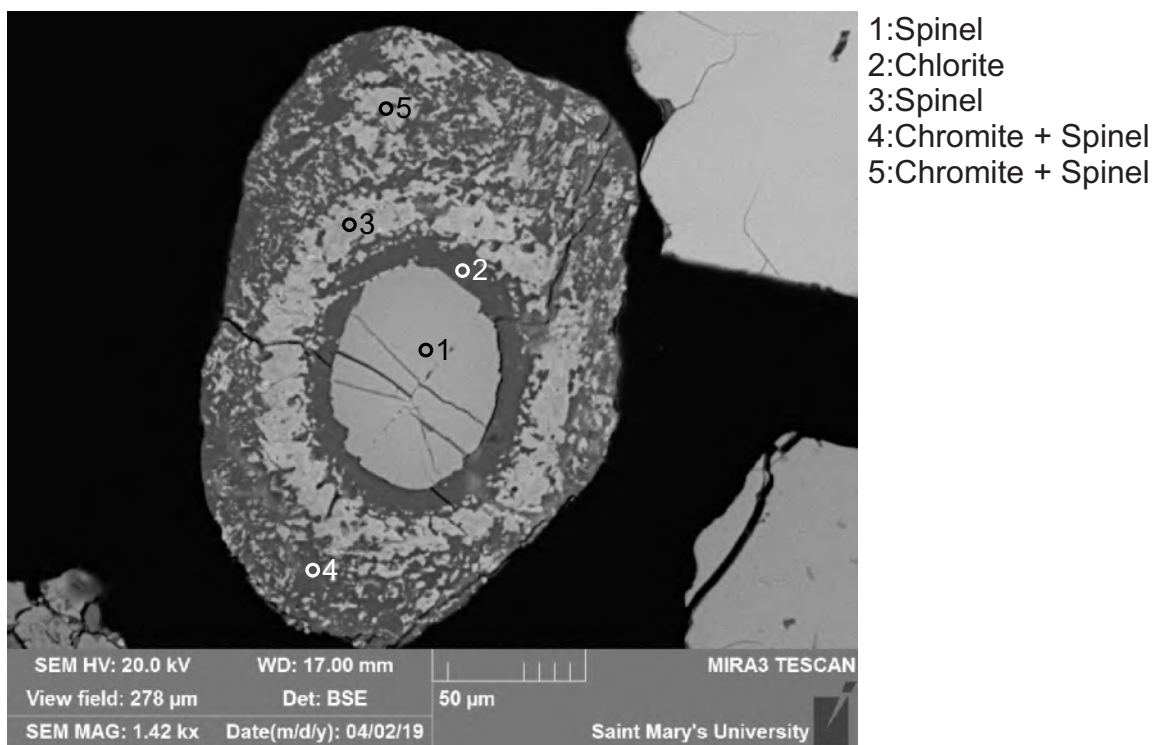

Figure B13.31: Sample S25 site 15.1 (SEM). Zoned spinel grain partly altered to chlorite. Ophiolite or metaophiolite.

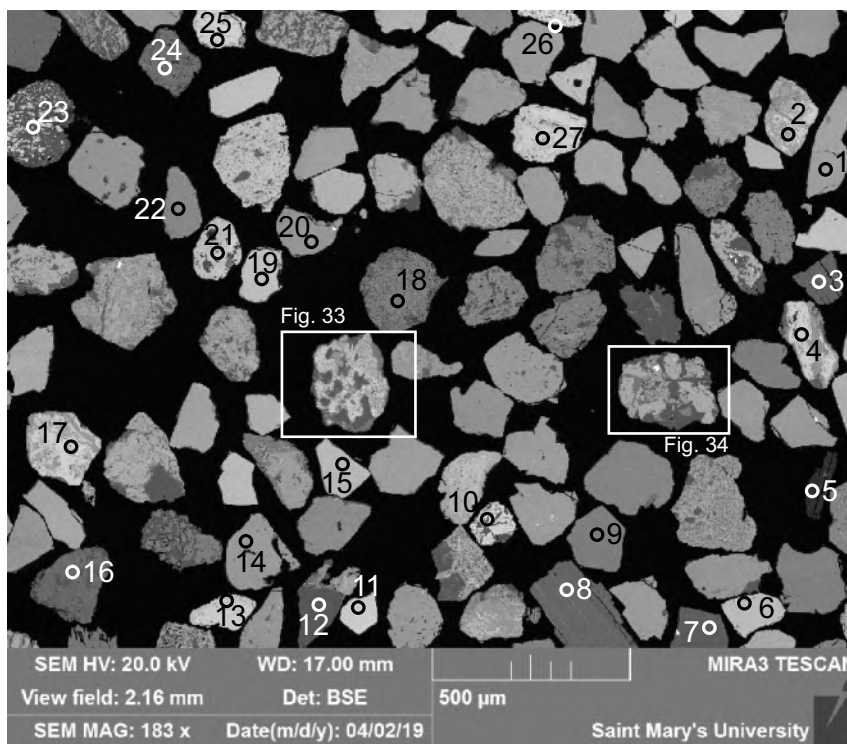

- 1: Spinel
- 2: "Ilmenite" +
- 3: Orthopyroxene
- 4: Titanite +
- 5: Mg-oxide/hydroxide
- 6: Chromite
- 7: Tourmaline
- 8: Orthopyroxene
- 9: Epidote
- 10: Chromite +
- 11: "Chromite"
- 12: Quartz
- 13: Ilmenite
- 14: Garnet
- 15: Chromite
- 16: Epidote
- 17:  $\text{TiO}_2$
- 18: Garnet
- 19: Chromite
- 20: Garnet
- 21: Chromite
- 22: Spinel
- 23: Chromite + Chlorite
- 24: Chlorite +
- 25: Ilmenite
- 26: Chromite +
- 27: Spinel

Figure B13.32: Sample S25 site 16 (SEM). The detrital minerals include: Ilm,  $\text{TiO}_2$  (Fig. 34), Chr, Spl, Grt, Tur, Ep, Zrn, Opx, Pl (Ab), Ap, Qz, Chl, Cal.

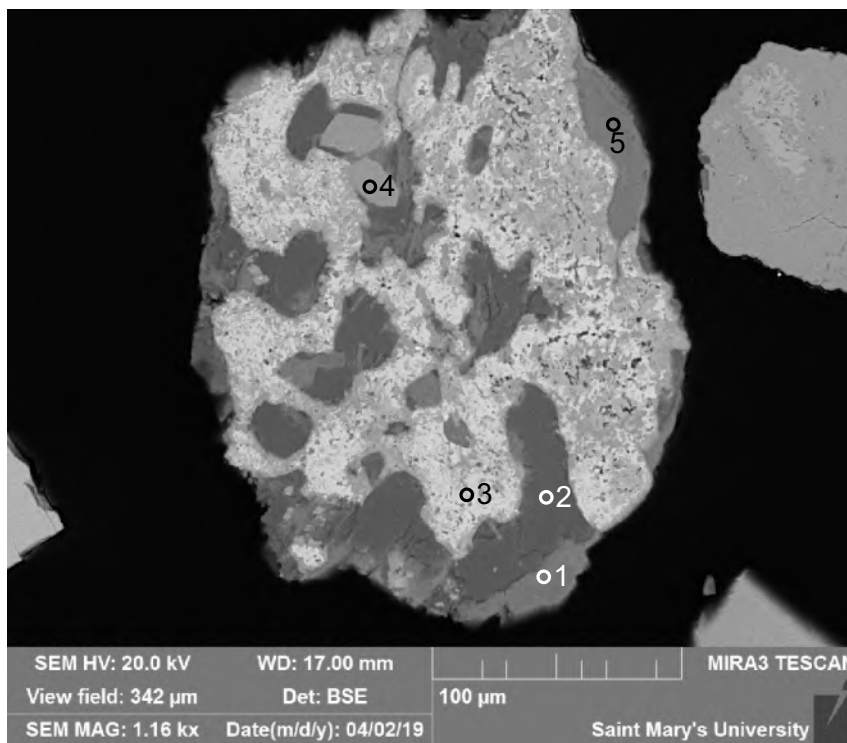

- 1: Chlorite
- 2: Albite
- 3: Ilmenite + Quartz, with Gypsum contaminant from seawater
- 4: Apatite
- 5: Chlorite

Figure B13.33: Sample S25 site 16.1 (SEM). It appears to be a lithic clast made up of albite + chlorite + apatite + altered ilmenite with quartz. Metamorphic.



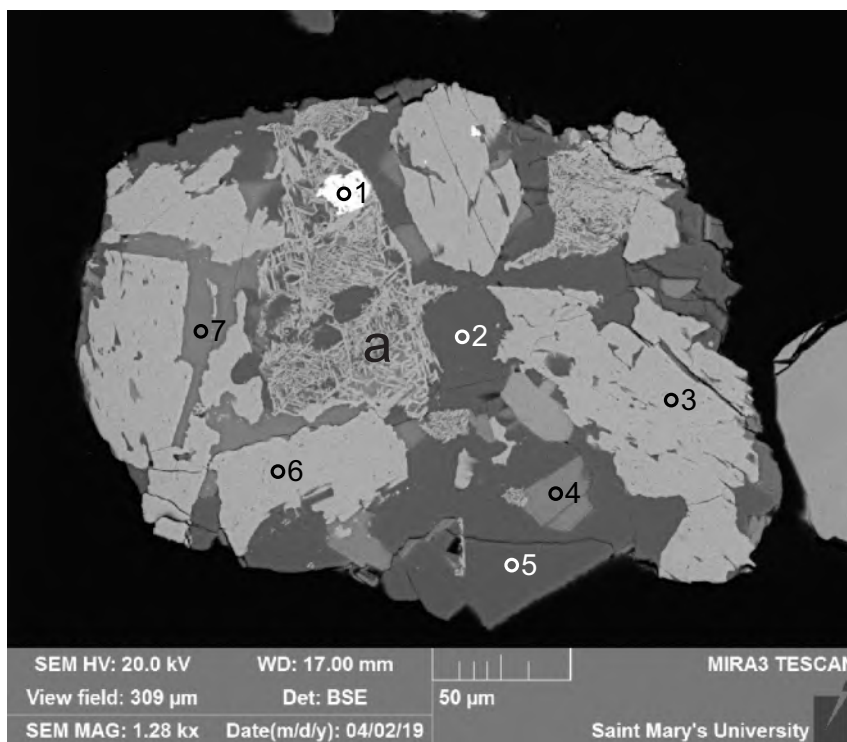

- 1:Zircon
- 2:Albite
- 3:TiO<sub>2</sub>
- 4:Chlorite
- 5:Quartz
- 6:TiO<sub>2</sub>
- 7:Calcite

Figure B13.34: Sample S25 site 16.2 (SEM). A metamorphic lithic clast made up of albite + titania + chlorite + calcite + an altered grain (a) with some replacement by zircon.

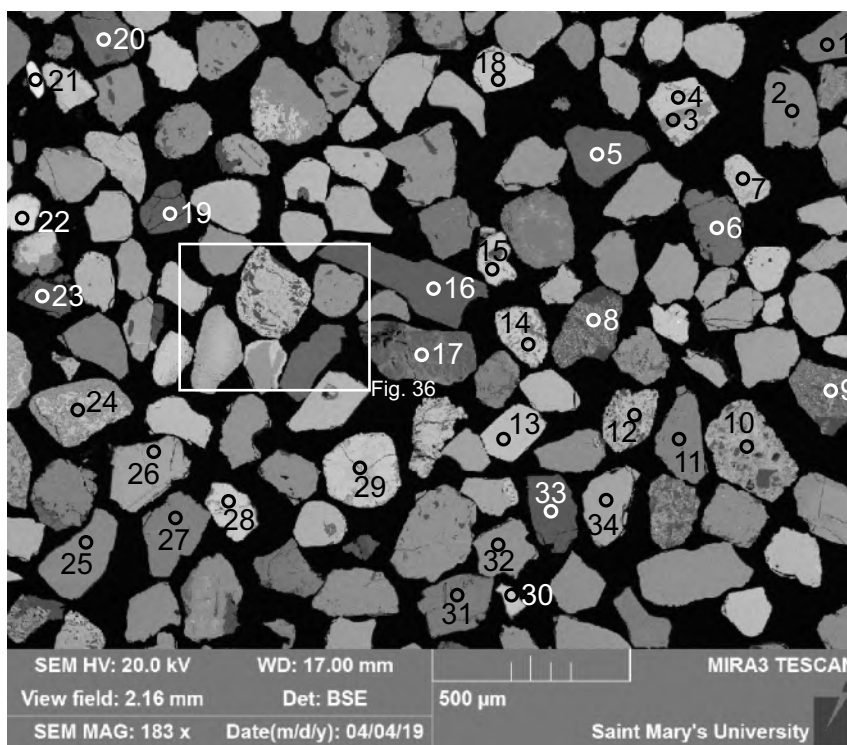

- 1:Garnet
- 2:Garnet
- 3:Titanite
- 4:Ilmenite +
- 5:Staurolite
- 6:Epidote
- 7:Ilmenite
- 8:Chromite +
- 9:Quartz + TiO<sub>2</sub>
- 10:Mix
- 11:Garnet
- 12:"Ilmenite" +
- 13:Chromite
- 14:Mix
- 15:Ilmenite
- 16:Orthopyroxene
- 17:Mix
- 18:Chromite
- 19:Orthopyroxene
- 20:Calcite
- 21:Zircon
- 22:"Chromite"
- 23:Orthopyroxene
- 24:Mix
- 25:Epidote
- 26:Chromite
- 27:Epidote
- 28:Ilmenite
- 29:Fe-oxide/hydroxide +
- 30:Ilmenite
- 31:Epidote
- 32:Garnet
- 33:Tourmaline
- 34:Chromite

Figure B13.35: Sample S25 site 17 (SEM). The detrital minerals include: Ilm, Chr, Spl, Tur, St, Ep, Ttn, Zrn, Opx, Qz, Chl, Cal.

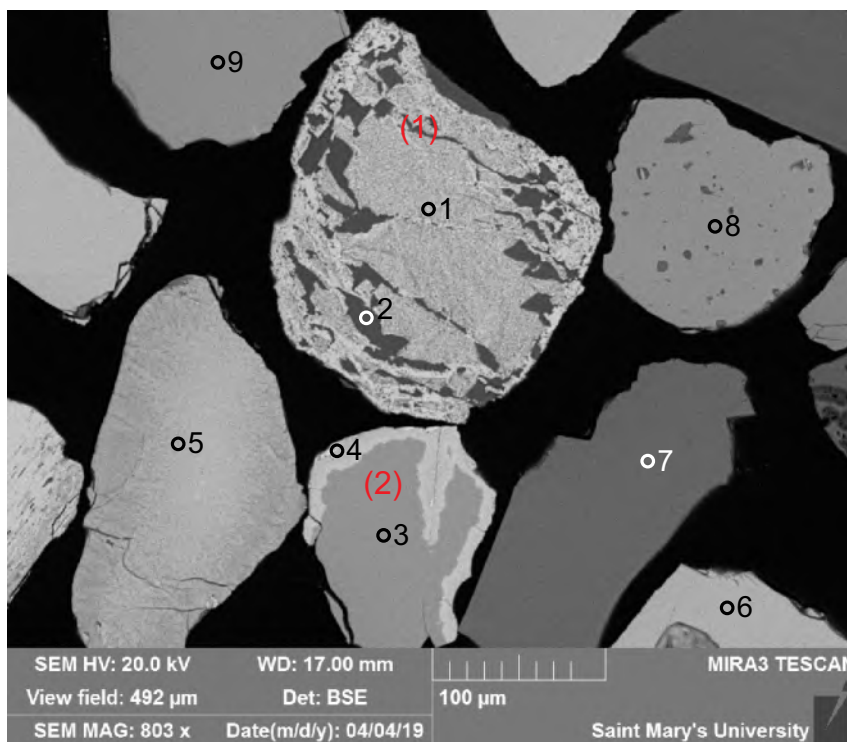

- 1:"Chromite"
- 2:Chlorite
- 3:Spinel
- 4:"Chromite"
- 5:"Chromite"
- 6:Chromite
- 7:Staurolite
- 8:Garnet
- 9:Spinel

Figure B13.36: Sample S25 site 17.1 (SEM). Various detrital grains: Altered chromite and chlorite, spinel overgrown by altered chromite, zoned altered chromite, chromite, staurolite, garnet, and spinel. Two lithic clasts of metaophiolite (1-2, 3-4).

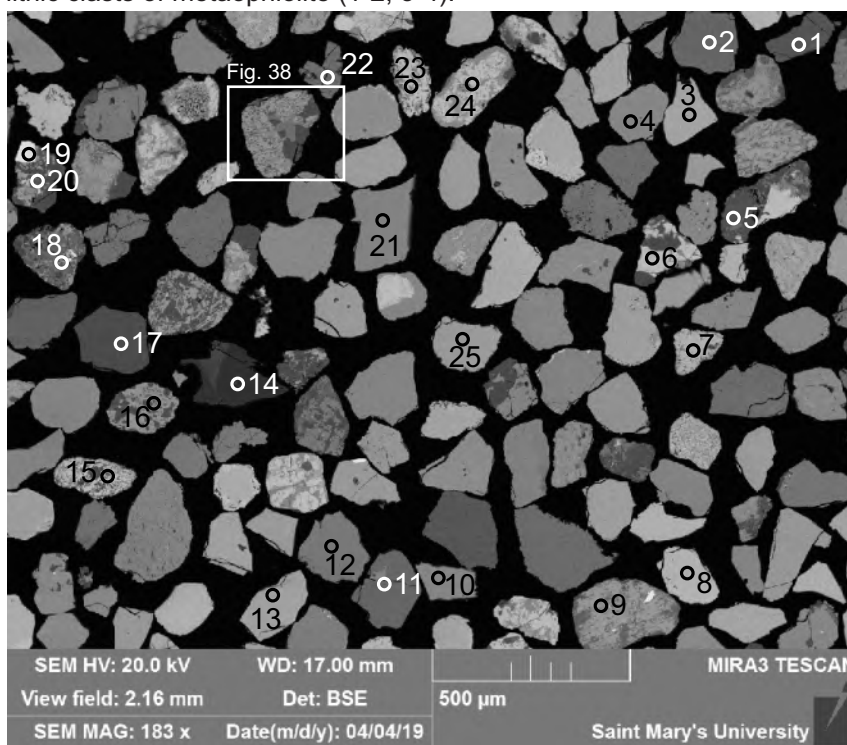

- 1:Orthopyroxene
- 2:Staurolite
- 3:Chromite
- 4:Garnet
- 5:Oligoclase + Chlorite
- 6:Ilmenite +
- 7:Fe-oxide/hydroxide +
- 8:Chromite
- 9:Mix
- 10:Garnet
- 11:Epidote
- 12:Epidote
- 13:Chromite
- 14:Fe-Periclase
- 15:Chromite
- 16:TiO<sub>2</sub> +
- 17:Cordierite
- 18:TiO<sub>2</sub> + Quartz
- 19:Zircon
- 20:Quartz + TiO<sub>2</sub>
- 21:Spinel
- 22:Clinopyroxene
- 23:Ilmenite
- 24:Ilmenite
- 25:Chromite

Figure B13.37: Sample S25 site 18 (SEM). The detrital minerals include: Ilm, Chr, Spl, Fe-Per, Grt, St, Crd, Ep, Zrn, Cpx, Opx, Pl (Olig), Qz, Ap, Chl.

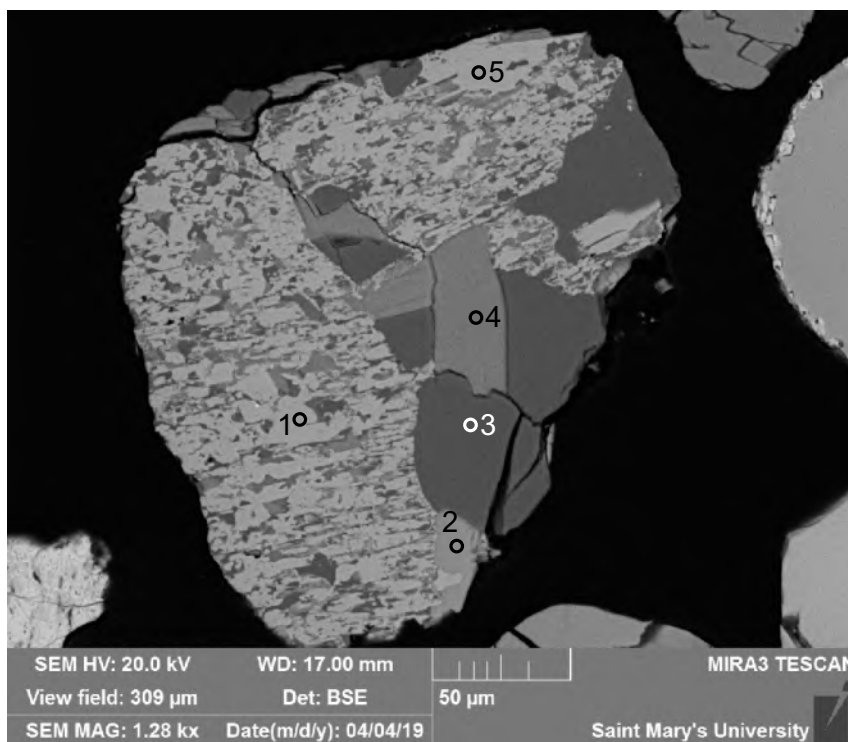

- 1:TiO<sub>2</sub>
- 2:Apatite
- 3:Quartz
- 4:Chlorite
- 5:TiO<sub>2</sub>

Figure B13.38: Sample S25 site 18.1 (SEM). Lithic clast made up of TiO<sub>2</sub> with trellis texture + apatite + quartz + chlorite. Metamorphic.

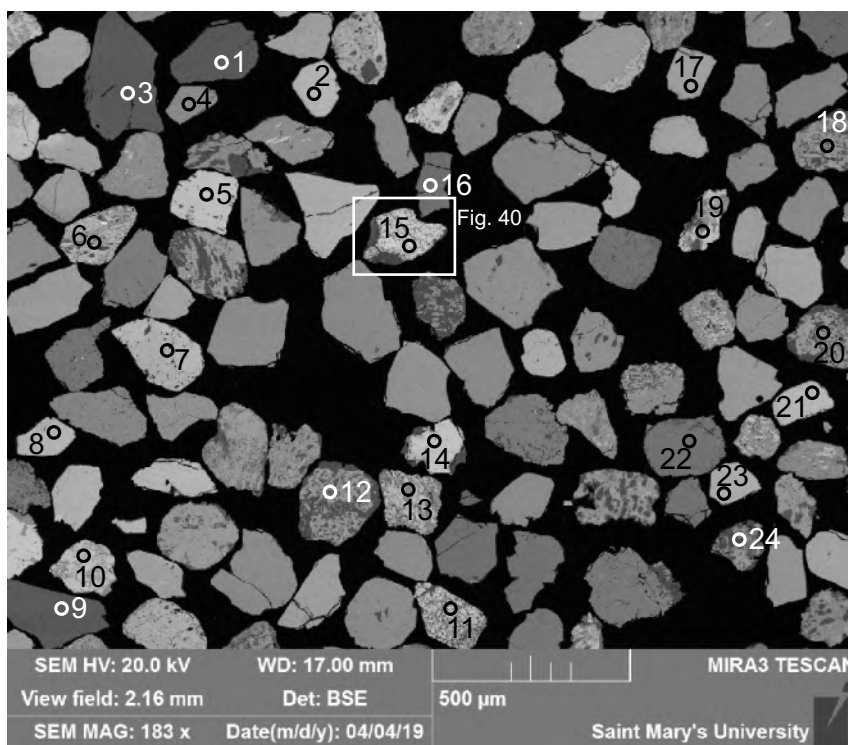

- 1:Orthopyroxene
- 2:Chromite
- 3:Orthopyroxene
- 4:Spinel
- 5:Ilmenite
- 6:TiO<sub>2</sub> +
- 7:Chromite
- 8:Chromite
- 9:Orthopyroxene
- 10:Ilmenite
- 11:Chromite +
- 12:TiO<sub>2</sub> + Quartz
- 13:TiO<sub>2</sub> +
- 14:Mix
- 15:"Chromite"
- 16:Epidote
- 17:Chromite
- 18:"Ilmenite" + Chlorite
- 19:Ilmenite +
- 20:TiO<sub>2</sub> + Chlorite
- 21:Chromite
- 22:Garnet
- 23:Chromite
- 24:Albite + TiO<sub>2</sub>

Figure B13.39: Sample S25 site 19 (SEM). The detrital minerals include: Ilm, TiO<sub>2</sub>, Chr, Spl, Grt, Ep, Opx, Ol, Pl (Ab), Qz, Chl.



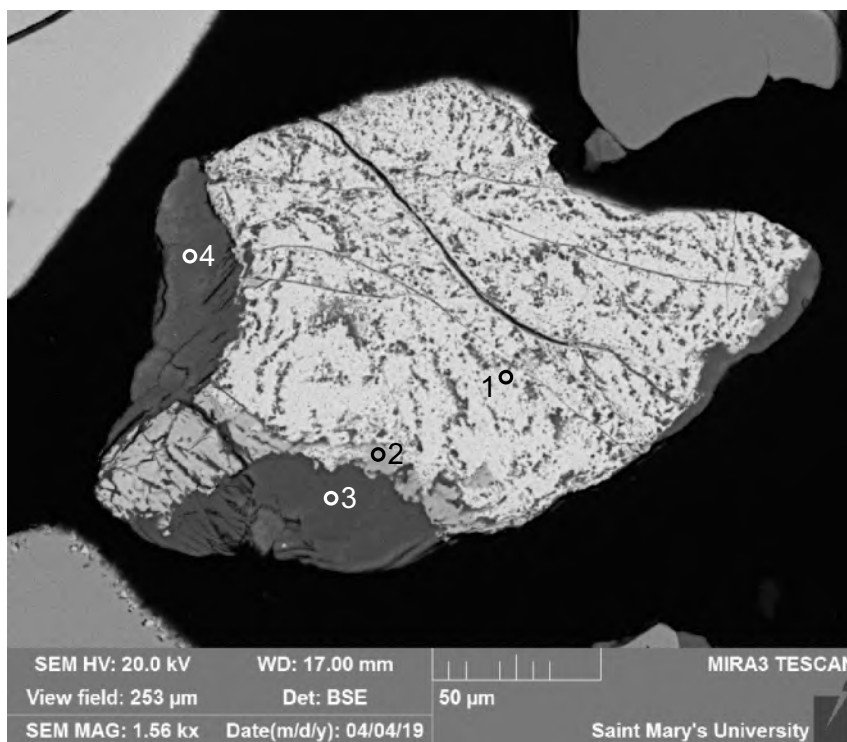

- 1:"Chromite"
- 2:Chromite
- 3:Chlorite
- 4:Serpentine

Figure B13.40: Sample S25 site 19.1 (SEM). A lithic clast made up of a large chromite grain partly altered to altered chromite and chlorite. This lithic clast also contains serpentine. Ophiolite.

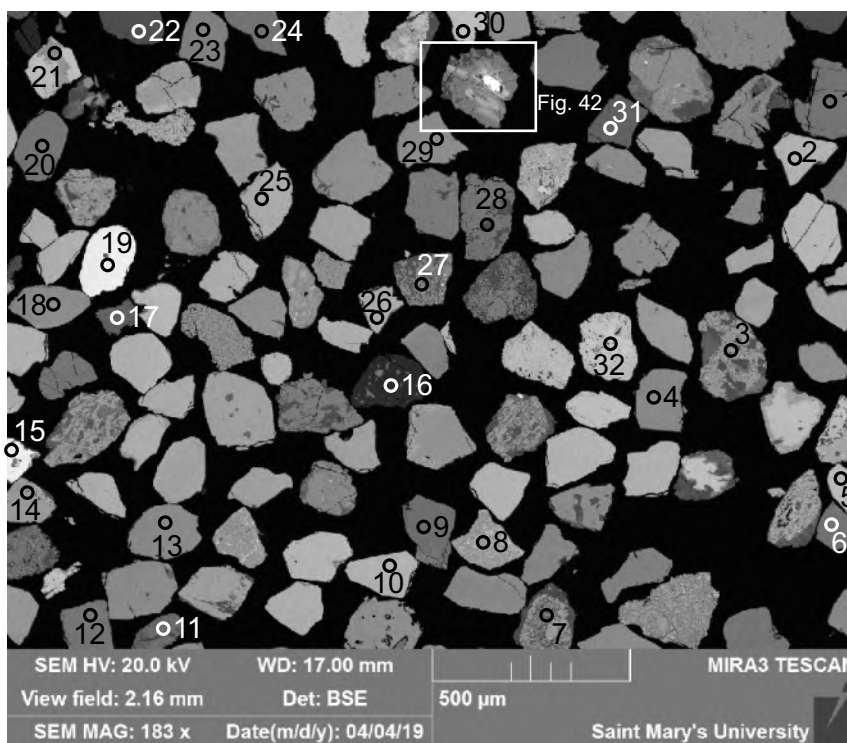

- 1:Epidote
- 2:Chromite
- 3:TiO<sub>2</sub> +
- 4:Garnet
- 5:Ilmenite
- 6:Spinel
- 7:TiO<sub>2</sub> + Chlorite
- 8:Mix
- 9:Spinel
- 10:Chromite
- 11:Mix
- 12:Spinel
- 13:Garnet
- 14:Spinel
- 15:Zircon
- 16:Mg-oxide/hydroxide
- 17:Epidote
- 18:Spinel
- 19:Zircon
- 20:Epidote
- 21:"Ilmenite" +
- 22:Tourmaline
- 23:Spinel
- 24:Epidote
- 25:Chromite
- 26:Chromite
- 27:Titanite
- 28:Quartz
- 29:Garnet
- 30:Ilmenite
- 31:Staurolite
- 32:Fe-oxide/hydroxide +

Figure B13.41: Sample S25 site 20 (SEM). The detrital minerals include: Ilm, TiO<sub>2</sub>, Chr, Spl, Grt, Per, Tur, St, Ep, Aln, Zrn, Ttn, Qz, Mnz, and probably Feohy.

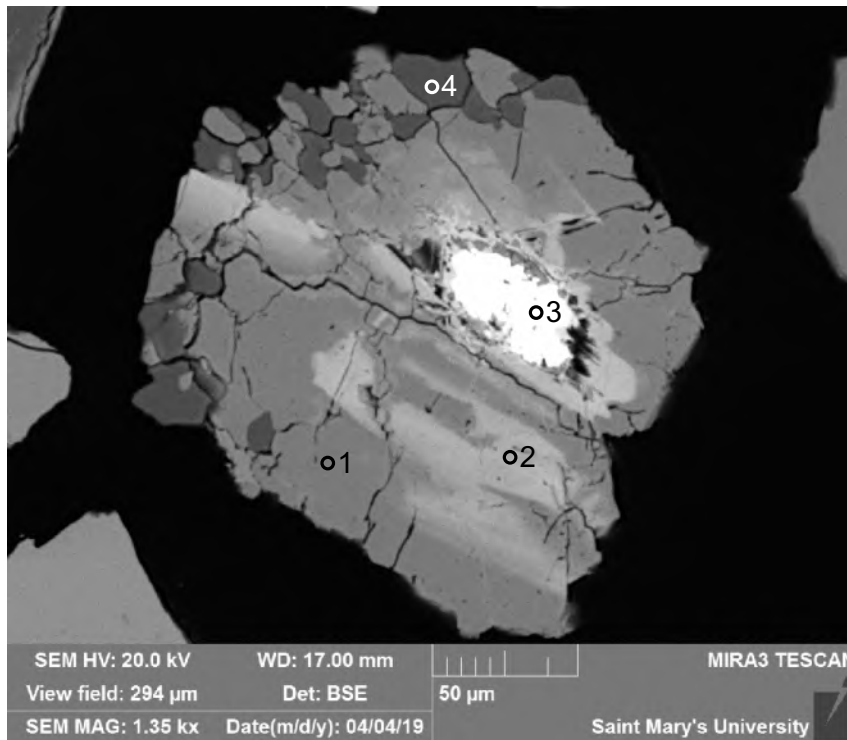

- 1:Epidote
- 2:Allanite +
- 3:Monazite
- 4:Quartz

Figure B13.42: Sample S25 site 20.1 (SEM). Lithic clast made up of epidote intergrown with allanite in parallel orientation + monazite that appears to be surrounded by a void (?volume reduction) + finally the clast is rimmed by allanite and quartz. Hydrothermal.



Table B13.1: Mineral chemical analyses from sample 25.

| Sample | Site | Position | Mineral    | SiO2   | TiO2  | Al2O3 | FeO   | MnO  | MgO   | CaO   | Na2O | K2O | P2O5  | SO3 | F    | Cl | V2O5 | Cr2O3 | NiO | CuO | ZnO | ZrO2 | Ag2O | La2O3 | Ce2O3 | Nd2O3 | HfO2 | WO3  | Total | Actual Total |
|--------|------|----------|------------|--------|-------|-------|-------|------|-------|-------|------|-----|-------|-----|------|----|------|-------|-----|-----|-----|------|------|-------|-------|-------|------|------|-------|--------------|
| S25    | 1    | 1        | Mag        | 1.39   |       |       | 98.08 | 0.52 |       |       |      |     |       |     |      |    |      |       |     |     |     |      |      |       |       |       |      | 100  | 96    |              |
| S25    | 1    | 2        | Chr        |        | 0.34  | 21.05 | 24.61 |      | 11.09 |       |      |     |       |     |      |    |      | 42.90 |     |     |     |      |      |       |       |       |      | 100  | 108   |              |
| S25    | 1    | 3        | Chr        |        |       | 9.57  | 24.56 |      | 9.18  |       |      |     |       |     |      |    |      | 56.69 |     |     |     |      |      |       |       |       |      | 100  | 103   |              |
| S25    | 1    | 4        | "Chr"      | 1.65   |       | 2.01  | 57.48 | 1.60 | 5.17  |       |      |     |       |     |      |    |      | 32.08 |     |     |     |      |      |       |       |       |      | 100  | 97    |              |
| S25    | 1    | 5        | Mnz +      | 4.00   |       | 1.47  | 1.69  |      |       | 11.12 |      |     | 30.72 |     | 3.43 |    |      |       |     |     |     |      | 2.46 | 12.72 | 24.12 | 8.27  |      | 100  | 102   |              |
| S25    | 1    | 6        | Ep         | 40.73  |       | 23.69 | 10.83 |      |       | 21.75 |      |     |       |     |      |    |      |       |     |     |     |      |      |       |       |       |      | 97   | 100   |              |
| S25    | 1    | 7        | Chr        |        |       | 8.76  | 19.71 |      | 9.46  |       |      |     |       |     |      |    |      | 62.08 |     |     |     |      |      |       |       |       |      | 100  | 116   |              |
| S25    | 1    | 8        | Ep         | 39.95  |       | 22.91 | 11.58 |      |       | 22.55 |      |     |       |     |      |    |      |       |     |     |     |      |      |       |       |       |      | 97   | 106   |              |
| S25    | 1    | 9        | Grt        | 39.11  |       | 20.66 | 33.33 | 1.83 | 2.41  | 2.67  |      |     |       |     |      |    |      |       |     |     |     |      |      |       |       |       |      | 100  | 112   |              |
| S25    | 1    | 10       | Grt        | 40.27  |       | 21.16 | 24.69 | 2.88 | 6.57  | 4.43  |      |     |       |     |      |    |      |       |     |     |     |      |      |       |       |       |      | 100  | 114   |              |
| S25    | 1    | 11       | Chr        |        |       | 27.44 | 17.92 |      | 14.31 |       |      |     |       |     |      |    |      | 40.32 |     |     |     |      |      |       |       |       |      | 100  | 107   |              |
| S25    | 1    | 12       | Grt        | 40.22  |       | 21.02 | 30.10 | 0.57 | 5.33  | 2.75  |      |     |       |     |      |    |      |       |     |     |     |      |      |       |       |       |      | 100  | 110   |              |
| S25    | 1    | 13       | Grt        | 39.86  |       | 20.81 | 33.08 | 0.45 | 4.17  | 1.64  |      |     |       |     |      |    |      |       |     |     |     |      |      |       |       |       |      | 100  | 107   |              |
| S25    | 1    | 14       | Ep         | 40.35  |       | 24.63 | 9.60  |      |       | 22.42 |      |     |       |     |      |    |      |       |     |     |     |      |      |       |       |       |      | 97   | 105   |              |
| S25    | 1    | 15       | Ep         | 40.67  |       | 26.41 | 7.48  |      |       | 22.44 |      |     |       |     |      |    |      |       |     |     |     |      |      |       |       |       |      | 97   | 100   |              |
| S25    | 1    | 16       | Ilm        |        | 51.06 |       | 45.94 | 3.00 |       |       |      |     |       |     |      |    |      |       |     |     |     |      |      |       |       |       |      | 100  | 97    |              |
| S25    | 1    | 17       | Ep         | 39.93  |       | 21.42 | 13.30 |      |       | 22.36 |      |     |       |     |      |    |      |       |     |     |     |      |      |       |       |       |      | 97   | 112   |              |
| S25    | 1    | 18       | Amph       | 53.63  |       | 3.21  | 3.64  |      | 26.54 | 9.00  |      |     |       |     |      |    |      | 0.98  |     |     |     |      |      |       |       |       |      | 97   | 123   |              |
| S25    | 1    | 19       | Tur        | 38.79  | 0.90  | 30.80 | 4.45  |      | 8.92  | 0.72  | 2.42 |     |       |     |      |    |      |       |     |     |     |      |      |       |       |       |      | 87   | 106   |              |
| S25    | 1    | 20       | Ep         | 40.44  |       | 28.86 | 4.47  | 0.27 |       | 22.96 |      |     |       |     |      |    |      |       |     |     |     |      |      |       |       |       |      | 97   | 122   |              |
| S25    | 1    | 21       | "Chr"      | 11.95  |       | 4.51  | 36.88 | 1.00 | 15.18 |       |      |     |       |     |      |    |      | 30.48 |     |     |     |      |      |       |       |       |      | 100  | 105   |              |
| S25    | 1    | 22       | Ep         | 41.00  |       | 31.11 | 1.81  |      |       | 23.08 |      |     |       |     |      |    |      |       |     |     |     |      |      |       |       |       |      | 97   | 116   |              |
| S25    | 1    | 23       | Spl        |        |       | 38.39 | 17.53 |      | 15.74 |       |      |     |       |     |      |    |      | 28.34 |     |     |     |      |      |       |       |       |      | 100  | 115   |              |
| S25    | 1    | 24       | St         | 29.91  | 0.56  | 54.26 | 13.54 |      | 1.73  |       |      |     |       |     |      |    |      |       |     |     |     |      |      |       |       |       |      | 100  | 116   |              |
| S25    | 1    | 25       | And        | 38.35  |       | 61.65 |       |      |       |       |      |     |       |     |      |    |      |       |     |     |     |      |      |       |       |       |      | 100  | 120   |              |
| S25    | 1    | 26       | Ep         | 53.33  |       | 20.97 | 1.56  |      | 2.54  | 18.59 |      |     |       |     |      |    |      |       |     |     |     |      |      |       |       |       |      | 97   | 103   |              |
| S25    | 1    | 27       | Grt        | 39.75  |       | 20.96 | 28.12 | 1.33 | 2.55  | 7.28  |      |     |       |     |      |    |      |       |     |     |     |      |      |       |       |       |      | 100  | 106   |              |
| S25    | 1    | 28       | Cpx        | 54.06  |       | 3.48  | 2.00  |      | 16.99 | 22.71 |      |     |       |     |      |    |      | 0.76  |     |     |     |      |      |       |       |       |      | 100  | 105   |              |
| S25    | 1    | 29       | Ep         | 40.42  |       | 25.63 | 8.48  | 0.48 |       | 22.00 |      |     |       |     |      |    |      |       |     |     |     |      |      |       |       |       |      | 97   | 101   |              |
| S25    | 1    | 30       | Chr        |        |       | 20.07 | 19.44 |      | 11.09 |       |      |     |       |     |      |    |      | 49.39 |     |     |     |      |      |       |       |       |      | 100  | 100   |              |
| S25    | 1    | 31       | Feohy +    | 4.75   |       | 3.96  | 81.26 |      | 1.28  |       | 0.83 |     | 1.49  |     |      |    |      |       |     |     |     |      |      |       |       |       | 6.43 | 100  | 75    |              |
| S25    | 1    | 32       | Ttn        | 33.35  | 34.73 | 2.13  | 2.08  |      | 1.61  | 26.10 |      |     |       |     |      |    |      |       |     |     |     |      |      |       |       |       |      | 100  | 110   |              |
| S25    | 1    | 33       | Ep         | 40.24  |       | 25.60 | 8.20  |      |       | 22.97 |      |     |       |     |      |    |      |       |     |     |     |      |      |       |       |       |      | 97   | 111   |              |
| S25    | 1    | 34       | Ilm        |        | 53.64 |       | 45.81 | 0.55 |       |       |      |     |       |     |      |    |      |       |     |     |     |      |      |       |       |       |      | 100  | 105   |              |
| S25    | 1    | 35       | Chr        |        |       | 10.04 | 20.83 |      | 8.85  |       |      |     |       |     |      |    | 0.44 | 59.84 |     |     |     |      |      |       |       |       |      | 100  | 105   |              |
| S25    | 1.1  | 1        | Qz         | 100.00 |       |       |       |      |       |       |      |     |       |     |      |    |      |       |     |     |     |      |      |       |       |       |      | 100  | 124   |              |
| S25    | 1.1  | 2        | Ep         | 40.45  |       | 23.22 | 11.04 |      |       | 21.42 |      |     |       |     |      |    |      |       |     |     |     |      |      |       | 0.87  |       |      | 97   | 109   |              |
| S25    | 1.1  | 3        | Mnz +      | 7.03   |       | 3.22  | 2.53  |      |       | 3.06  |      |     | 27.89 |     |      |    |      |       |     |     |     |      | 3.03 | 15.06 | 29.25 | 8.93  |      | 100  | 103   |              |
| S25    | 1.1  | 4        | Aln        | 36.20  |       | 19.18 | 12.09 | 0.92 |       | 14.72 |      |     |       |     |      |    |      |       |     |     |     |      |      | 3.07  | 7.35  | 3.47  |      | 97   | 107   |              |
| S25    | 1.1  | 5        | Ap +       | 0.59   |       | 0.37  | 0.58  |      |       | 47.58 |      |     | 43.65 |     | 5.76 |    |      |       |     |     |     |      |      |       |       |       |      | 1.46 | 100   | 126          |
| S25    | 1.1  | 6        | Aln        | 33.37  |       | 14.64 | 15.17 |      |       | 9.86  |      |     |       |     |      |    |      |       |     |     |     |      |      |       | 7.62  | 13.72 | 2.62 | 97   | 107   |              |
| S25    | 2    | 1        | Chr        |        |       | 8.70  | 20.75 |      | 9.62  |       |      |     |       |     |      |    |      | 60.93 |     |     |     |      |      |       |       |       |      | 100  | 107   |              |
| S25    | 2    | 2        | Grt        | 39.44  |       | 20.60 | 29.47 | 4.30 | 1.80  | 4.38  |      |     |       |     |      |    |      |       |     |     |     |      |      |       |       |       |      | 100  | 115   |              |
| S25    | 2    | 3        | Opx        | 57.84  |       | 1.42  | 5.26  |      | 34.24 | 0.63  |      |     |       |     |      |    |      | 0.61  |     |     |     |      |      |       |       |       |      | 100  | 122   |              |
| S25    | 2    | 4        | Mgs        |        |       |       |       |      | 94.09 | 2.23  |      |     |       |     |      |    |      |       |     |     |     |      |      |       |       |       |      | 100  | 49    |              |
| S25    | 2    | 5        | Grt        | 39.47  |       | 20.89 | 24.69 | 4.93 | 1.17  | 8.84  |      |     |       |     |      |    |      |       |     |     |     |      |      |       |       |       |      | 100  | 120   |              |
| S25    | 2    | 6        | Byt +      | 48.12  |       | 20.89 | 9.74  |      |       | 16.82 | 4.43 |     |       |     |      |    |      |       |     |     |     |      |      |       |       |       |      | 100  | 131   |              |
| S25    | 2    | 7        | Chr        |        |       | 10.90 | 25.84 |      | 7.94  |       |      |     |       |     |      |    |      | 55.31 |     |     |     |      |      |       |       |       |      | 100  | 115   |              |
| S25    | 2    | 8        | Chr +      | 19.31  |       | 9.91  | 17.80 | 0.65 | 21.00 |       |      |     |       |     |      |    |      | 31.32 |     |     |     |      |      |       |       |       |      | 100  | 108   |              |
| S25    | 2    | 9        | Chr        | 3.89   |       | 28.72 | 18.93 |      | 14.06 |       |      |     |       |     |      |    |      | 34.40 |     |     |     |      |      |       |       |       |      | 100  | 120   |              |
| S25    | 2    | 10       | Feohy +    | 15.76  |       | 4.22  | 72.23 |      | 1.87  | 0.44  | 0.79 |     | 1.58  |     |      |    |      | 0.39  |     |     |     |      |      |       |       |       | 2.71 | 100  | 87    |              |
| S25    | 2    | 11       | Qz + Feohy | 73.30  |       | 0.74  | 24.90 |      |       |       | 0.40 |     | 0.66  |     |      |    |      |       |     |     |     |      |      |       |       |       |      | 100  | 107   |              |
| S25    | 2    | 12       | Chr        |        |       | 9.34  | 21.01 |      | 10.49 |       |      |     |       |     |      |    |      | 59.17 |     |     |     |      |      |       |       |       |      | 100  | 107   |              |
| S25    | 2    | 13       | Ep         | 43.48  |       | 28.56 | 0.87  |      | 0.85  | 21.17 | 1.14 |     |       |     | 0.93 |    |      |       |     |     |     |      |      |       |       |       |      | 97   | 106   |              |
| S25    | 2    | 14       | Ep         | 39.92  |       | 23.31 | 11.05 | 0.33 |       | 22.39 |      |     |       |     |      |    |      |       |     |     |     |      |      |       |       |       |      | 97   | 108   |              |
| S25    | 2    | 15       | Chr        |        |       | 11.31 | 22.78 |      | 8.48  |       |      |     |       |     |      |    |      | 57.42 |     |     |     |      |      |       |       |       |      | 100  | 102   |              |

Table B13.1: Mineral chemical analyses from sample 25.

| Sample | Site | Position | Mineral     | SiO2  | TiO2  | Al2O3 | FeO   | MnO   | MgO   | CaO   | Na2O  | K2O  | P2O5 | SO3 | F    | Cl | V2O5 | Cr2O3 | NiO  | CuO | ZnO | ZrO2  | Ag2O | La2O3 | Ce2O3 | Nd2O3 | HfO2 | WO3  | Total | Actual Total |
|--------|------|----------|-------------|-------|-------|-------|-------|-------|-------|-------|-------|------|------|-----|------|----|------|-------|------|-----|-----|-------|------|-------|-------|-------|------|------|-------|--------------|
| S25    | 2    | 16       | Feohy +     | 3.66  |       | 3.89  | 88.82 |       |       |       |       |      |      |     |      |    |      | 0.54  |      |     |     |       |      |       |       |       |      | 3.09 | 100   | 72           |
| S25    | 2    | 17       | Ilm         |       | 54.25 |       | 40.52 | 4.79  | 0.43  |       |       |      |      |     |      |    |      |       |      |     |     |       |      |       |       |       |      |      | 100   | 106          |
| S25    | 2    | 18       | TiO2        |       | 99.62 |       | 0.38  |       |       |       |       |      |      |     |      |    |      |       |      |     |     |       |      |       |       |       |      |      | 100   | 109          |
| S25    | 2    | 19       | "Ilm" + Chl | 9.34  | 70.83 | 5.97  | 10.97 |       | 2.89  |       |       |      |      |     |      |    |      |       |      |     |     |       |      |       |       |       |      |      | 100   | 88           |
| S25    | 2    | 20       | Spl         |       |       | 58.83 | 11.39 |       | 20.81 |       |       |      |      |     |      |    |      | 8.62  | 0.36 |     |     |       |      |       |       |       |      |      | 100   | 109          |
| S25    | 2    | 21       | Ab          | 68.67 | 2.20  | 16.85 | 0.86  |       |       | 1.53  | 9.88  |      |      |     |      |    |      |       |      |     |     |       |      |       |       |       |      |      | 100   | 103          |
| S25    | 2    | 22       | And         | 38.18 |       | 61.82 |       |       |       |       |       |      |      |     |      |    |      |       |      |     |     |       |      |       |       |       |      |      | 100   | 113          |
| S25    | 2    | 23       | Spl         |       |       | 39.55 | 15.35 |       | 16.85 |       |       |      |      |     |      |    |      | 28.25 |      |     |     |       |      |       |       |       |      |      | 100   | 100          |
| S25    | 2    | 24       | Chr         |       |       | 8.72  | 19.03 |       | 7.32  |       |       |      |      |     |      |    |      | 64.93 |      |     |     |       |      |       |       |       |      |      | 100   | 96           |
| S25    | 2    | 25       | Qz + TiO2   | 75.00 | 24.57 |       |       | 0.43  |       |       |       |      |      |     |      |    |      |       |      |     |     |       |      |       |       |       |      |      | 100   | 114          |
| S25    | 2    | 26       | Zrn         | 30.95 | 0.69  |       |       |       |       |       |       |      |      |     |      |    |      |       |      |     |     | 68.36 |      |       |       |       |      |      | 100   | 112          |
| S25    | 2    | 27       | "Opx"       | 57.44 |       | 4.35  | 6.45  |       | 22.81 | 7.96  | 1.00  |      |      |     |      |    |      |       |      |     |     |       |      |       |       |       |      |      | 100   | 100          |
| S25    | 2    | 28       | TiO2 +      | 18.57 | 64.82 | 1.14  | 0.54  |       |       | 14.93 |       |      |      |     |      |    |      |       |      |     |     |       |      |       |       |       |      |      | 100   | 108          |
| S25    | 2    | 29       | Ilm         |       | 49.53 |       | 45.60 | 4.88  |       |       |       |      |      |     |      |    |      |       |      |     |     |       |      |       |       |       |      |      | 100   | 101          |
| S25    | 2    | 30       | Chr         |       |       | 12.76 | 22.55 |       | 8.89  |       |       |      |      |     |      |    |      | 55.79 |      |     |     |       |      |       |       |       |      |      | 100   | 103          |
| S25    | 2    | 31       | Cpx         | 48.47 | 1.37  | 7.85  | 7.44  |       | 12.33 | 22.14 | 0.40  |      |      |     |      |    |      |       |      |     |     |       |      |       |       |       |      |      | 100   | 115          |
| S25    | 2    | 32       | Chr         |       |       | 23.23 | 18.19 |       | 12.97 |       |       |      |      |     |      |    |      |       |      |     |     |       |      |       |       |       |      |      | 100   | 110          |
| S25    | 2    | 33       | TiO2 +      |       | 92.75 | 0.74  | 3.31  | 0.45  |       |       |       |      |      |     | 2.75 |    |      | 45.16 |      |     |     |       |      |       |       |       |      |      | 100   | 107          |
| S25    | 2    | 34       | Mix         | 20.18 | 61.34 | 1.26  | 1.31  |       |       | 15.91 |       |      |      |     |      |    |      |       |      |     |     |       |      |       |       |       |      |      | 100   | 111          |
| S25    | 2.1  | 1        | Ilm         |       | 52.22 |       | 42.14 | 5.64  |       |       |       |      |      |     |      |    |      |       |      |     |     |       |      |       |       |       |      |      | 100   | 107          |
| S25    | 2.1  | 2        | Ep          | 39.97 | 0.83  | 21.14 | 13.42 |       |       | 21.63 |       |      |      |     |      |    |      |       |      |     |     |       |      |       |       |       |      |      | 97    | 112          |
| S25    | 2.1  | 3        | Ep          | 39.56 | 0.97  | 22.68 | 11.73 | 0.77  |       | 21.30 |       |      |      |     |      |    |      |       |      |     |     |       |      |       |       |       |      |      | 97    | 112          |
| S25    | 2.1  | 4        | Chl         | 26.71 | 1.30  | 19.03 | 18.79 | 0.52  | 17.67 | 0.48  | 0.49  |      |      |     |      |    |      |       |      |     |     |       |      |       |       |       |      |      | 85    | 100          |
| S25    | 2.1  | 5        | Chl         | 26.64 | 1.33  | 19.60 | 18.67 | 0.51  | 18.24 |       |       |      |      |     |      |    |      |       |      |     |     |       |      |       |       |       |      |      | 85    | 102          |
| S25    | 2.1  | 6        | Chl         | 27.32 |       | 19.75 | 18.90 | 0.52  | 17.92 |       | 0.60  |      |      |     |      |    |      |       |      |     |     |       |      |       |       |       |      |      | 85    | 100          |
| S25    | 2.1  | 7        | TiO2        |       | 96.64 |       | 3.02  |       |       | 0.34  |       |      |      |     |      |    |      |       |      |     |     |       |      |       |       |       |      |      | 100   | 102          |
| S25    | 2.1  | 8        | Ttn         | 33.11 | 36.87 | 1.38  | 1.19  |       | 0.40  | 27.05 |       |      |      |     |      |    |      |       |      |     |     |       |      |       |       |       |      |      | 100   | 112          |
| S25    | 2.1  | 9        | "Ilm"       |       | 91.00 |       | 6.17  | 2.49  |       | 0.33  |       |      |      |     |      |    |      |       |      |     |     |       |      |       |       |       |      |      | 100   | 105          |
| S25    | 2.1  | 10       | Ttn         | 31.44 | 39.26 | 1.18  | 0.71  |       |       | 25.97 |       |      |      |     | 1.44 |    |      |       |      |     |     |       |      |       |       |       |      |      | 100   | 113          |
| S25    | 2.2  | 1        | Ilm         |       | 53.81 |       | 36.03 | 10.16 |       |       |       |      |      |     |      |    |      |       |      |     |     |       |      |       |       |       |      |      | 100   | 108          |
| S25    | 2.2  | 2        | Ttn         | 39.23 | 34.59 | 0.93  |       |       |       | 25.25 |       |      |      |     |      |    |      |       |      |     |     |       |      |       |       |       |      |      | 100   | 114          |
| S25    | 2.2  | 3        | Ab          | 68.17 |       | 19.45 | 0.45  |       |       |       | 10.74 | 1.20 |      |     |      |    |      |       |      |     |     |       |      |       |       |       |      |      | 100   | 114          |
| S25    | 2.2  | 4        | Chl         | 28.60 |       | 18.53 | 22.90 | 0.88  | 12.92 |       | 0.60  | 0.57 |      |     |      |    |      |       |      |     |     |       |      |       |       |       |      |      | 85    | 99           |
| S25    | 2.2  | 5        | Ilm         |       | 53.96 |       | 36.07 | 9.97  |       |       |       |      |      |     |      |    |      |       |      |     |     |       |      |       |       |       |      |      | 100   | 108          |
| S25    | 2.2  | 6        | Qz +        | 95.78 | 1.41  | 0.50  | 0.79  |       | 0.29  | 1.23  |       |      |      |     |      |    |      |       |      |     |     |       |      |       |       |       |      |      | 100   | 120          |
| S25    | 3    | 1        | Ilm         |       | 47.66 |       | 49.09 | 3.25  |       |       |       |      |      |     |      |    |      |       |      |     |     |       |      |       |       |       |      |      | 100   | 105          |
| S25    | 3    | 2        | Spl         |       |       | 39.94 | 17.08 |       | 17.29 |       |       |      |      |     |      |    |      | 25.70 |      |     |     |       |      |       |       |       |      |      | 100   | 111          |
| S25    | 3    | 3        | Chr         |       |       | 14.88 | 33.53 |       | 7.16  |       |       |      |      |     |      |    |      | 43.94 |      |     |     |       |      |       |       |       |      |      | 100   | 110          |
| S25    | 3    | 4        | Ilm         |       | 53.23 |       | 42.52 | 4.25  |       |       |       |      |      |     |      |    |      | 0.47  |      |     |     |       |      |       |       |       |      |      | 100   | 113          |
| S25    | 3    | 5        | St          | 28.74 |       | 43.46 | 23.64 | 0.73  | 3.43  |       |       |      |      |     |      |    |      |       |      |     |     |       |      |       |       |       |      |      | 100   | 109          |
| S25    | 3    | 6        | Ilm         |       | 48.90 |       | 49.86 | 1.25  |       |       |       |      |      |     |      |    |      |       |      |     |     |       |      |       |       |       |      |      | 100   | 113          |
| S25    | 3    | 7        | Amph        | 48.06 | 0.44  | 11.65 | 11.31 |       | 13.17 | 9.73  | 2.30  | 0.35 |      |     |      |    |      |       |      |     |     |       |      |       |       |       |      |      | 97    | 119          |
| S25    | 3    | 8        | Grt         | 39.30 |       | 20.92 | 29.69 | 1.71  | 2.24  | 6.14  |       |      |      |     |      |    |      |       |      |     |     |       |      |       |       |       |      |      | 100   | 125          |
| S25    | 3    | 9        | Chr         |       |       | 25.91 | 19.73 |       | 12.66 |       |       |      |      |     |      |    |      |       |      |     |     |       |      |       |       |       |      |      | 100   | 119          |
| S25    | 3    | 10       | Tur         | 38.40 | 0.84  | 32.16 | 4.79  |       | 8.00  | 0.50  | 2.31  |      |      |     |      |    | 0.51 | 41.18 |      |     |     |       |      |       |       |       |      |      | 87    | 105          |
| S25    | 3    | 11       | Chr         |       |       | 22.03 | 17.13 |       | 12.69 |       |       |      |      |     |      |    |      | 48.15 |      |     |     |       |      |       |       |       |      |      | 100   | 119          |
| S25    | 3    | 12       | Grt         | 42.02 |       | 21.50 | 1.35  |       |       | 35.13 |       |      |      |     |      |    |      |       |      |     |     |       |      |       |       |       |      |      | 100   | 122          |
| S25    | 3    | 13       | Grt         | 39.63 |       | 20.66 | 30.43 | 1.26  | 2.33  | 5.69  |       |      |      |     |      |    |      |       |      |     |     |       |      |       |       |       |      |      | 100   | 120          |
| S25    | 3    | 14       | Chr         |       | 0.39  | 10.45 | 25.55 |       | 9.76  |       |       |      |      |     |      |    |      | 53.86 |      |     |     |       |      |       |       |       |      |      | 100   | 107          |
| S25    | 3    | 15       | TiO2        |       | 99.51 |       | 0.49  |       |       |       |       |      |      |     |      |    |      |       |      |     |     |       |      |       |       |       |      |      | 100   | 97           |
| S25    | 3    | 16       | Grt         | 39.85 |       | 20.72 | 24.27 | 6.08  | 1.23  | 7.84  |       |      |      |     |      |    |      |       |      |     |     |       |      |       |       |       |      |      | 100   | 105          |
| S25    | 3    | 17       | Chr         |       |       | 22.98 | 21.74 |       | 11.25 |       |       |      |      |     |      |    |      | 44.03 |      |     |     |       |      |       |       |       |      |      | 100   | 100          |
| S25    | 3    | 18       | St          | 28.63 |       | 43.58 | 21.41 | 0.37  | 6.01  |       |       |      |      |     |      |    |      |       |      |     |     |       |      |       |       |       |      |      | 100   | 95           |
| S25    | 3    | 19       | Ilm         |       | 56.61 |       | 41.54 | 1.85  |       |       |       |      |      |     |      |    |      |       |      |     |     |       |      |       |       |       |      |      | 100   | 105          |
| S25    | 3    | 20       | Amph        | 55.17 |       | 3.67  | 6.97  |       | 19.42 | 11.30 | 0.47  |      |      |     |      |    |      |       |      |     |     |       |      |       |       |       |      |      | 97    | 115          |
| S25    | 3    | 21       | Ilm         |       | 53.44 |       | 35.82 | 10.74 |       |       |       |      |      |     |      |    |      |       |      |     |     |       |      |       |       |       |      |      | 100   | 107          |

Table B13.1: Mineral chemical analyses from sample 25.

| Sample | Site | Position | Mineral       | SiO2   | TiO2  | Al2O3 | FeO   | MnO   | MgO   | CaO   | Na2O  | K2O  | P2O5 | SO3 | F | Cl | V2O5 | Cr2O3 | NiO | CuO | ZnO  | ZrO2  | Ag2O | La2O3 | Ce2O3 | Nd2O3 | HfO2 | WO3  | Total | Actual Total |
|--------|------|----------|---------------|--------|-------|-------|-------|-------|-------|-------|-------|------|------|-----|---|----|------|-------|-----|-----|------|-------|------|-------|-------|-------|------|------|-------|--------------|
| S25    | 3    | 22       | Cpx           | 54.63  |       | 2.00  | 2.29  |       | 20.36 | 20.06 |       |      |      |     |   |    |      | 0.66  |     |     |      |       |      |       |       |       |      |      | 100   | 117          |
| S25    | 3    | 23       | Grt           | 39.52  |       | 20.70 | 14.01 | 16.98 | 1.00  | 7.79  |       |      |      |     |   |    |      |       |     |     |      |       |      |       |       |       |      |      | 100   | 112          |
| S25    | 3    | 24       | "Ilm" +       | 7.68   | 67.72 |       | 23.23 | 1.37  |       |       |       |      |      |     |   |    |      |       |     |     |      |       |      |       |       |       |      |      | 100   | 101          |
| S25    | 3    | 25       | Grt           | 39.66  |       | 20.92 | 30.95 |       | 1.22  | 7.26  |       |      |      |     |   |    |      |       |     |     |      |       |      |       |       |       |      |      | 100   | 112          |
| S25    | 3    | 26       | Ep            | 40.02  |       | 21.37 | 13.16 | 0.37  |       | 22.08 |       |      |      |     |   |    |      |       |     |     |      |       |      |       |       |       |      |      | 97    | 105          |
| S25    | 3    | 27       | Ilm           |        | 50.21 |       | 48.45 | 1.34  |       |       |       |      |      |     |   |    |      |       |     |     |      |       |      |       |       |       |      |      | 100   | 102          |
| S25    | 3    | 28       | Ep            | 40.68  |       | 25.67 | 3.31  |       | 7.67  | 19.67 |       |      |      |     |   |    |      |       |     |     |      |       |      |       |       |       |      |      | 97    | 97           |
| S25    | 3    | 29       | Ep            | 40.37  |       | 24.46 | 9.57  |       |       | 22.60 |       |      |      |     |   |    |      |       |     |     |      |       |      |       |       |       |      |      | 97    | 102          |
| S25    | 3    | 30       | TiO2 + Ms     | 28.16  | 52.66 | 13.57 | 0.98  |       | 1.20  |       |       | 3.44 |      |     |   |    |      |       |     |     |      |       |      |       |       |       |      |      | 100   | 109          |
| S25    | 3    | 31       | Opx           | 56.71  |       | 3.46  | 5.28  |       | 32.66 | 1.17  |       |      |      |     |   |    |      | 0.71  |     |     |      |       |      |       |       |       |      |      | 100   | 111          |
| S25    | 3    | 32       | Chr           |        |       | 9.90  | 21.35 |       | 8.93  |       |       |      |      |     |   |    |      | 59.83 |     |     |      |       |      |       |       |       |      |      | 100   | 98           |
| S25    | 3    | 33       | Ep            | 40.83  |       | 25.79 | 8.03  |       |       | 22.35 |       |      |      |     |   |    |      |       |     |     |      |       |      |       |       |       |      |      | 97    | 98           |
| S25    | 3    | 34       | Ep            | 40.18  | 1.27  | 21.67 | 11.69 |       |       | 22.19 |       |      |      |     |   |    |      |       |     |     |      |       |      |       |       |       |      |      | 97    | 95           |
| S25    | 3    | 35       | Opx           | 56.50  |       | 3.57  | 4.86  |       | 32.90 | 1.44  |       |      |      |     |   |    |      | 0.73  |     |     |      |       |      |       |       |       |      |      | 100   | 104          |
| S25    | 3    | 36       | Ilm + Ms      | 9.61   | 44.07 | 5.75  | 35.36 | 2.66  |       |       |       | 2.54 |      |     |   |    |      |       |     |     |      |       |      |       |       |       |      |      | 100   | 98           |
| S25    | 3    | 37       | Ms +          | 49.72  | 2.04  | 27.39 | 3.14  |       | 2.16  |       | 0.85  | 9.70 |      |     |   |    |      |       |     |     |      |       |      |       |       |       |      |      | 95    | 104          |
| S25    | 3    | 38       | "Ilm" +       | 0.78   | 63.74 | 1.26  | 30.33 | 1.75  |       |       |       |      | 0.77 |     |   |    |      |       |     |     |      |       |      |       |       |       | 1.38 |      | 100   | 99           |
| S25    | 3    | 39       | Ab            | 66.98  |       | 19.26 | 0.83  |       |       | 1.04  | 11.08 | 0.80 |      |     |   |    |      |       |     |     |      |       |      |       |       |       |      |      | 100   | 107          |
| S25    | 3    | 40       | Ilm           |        | 53.43 |       | 38.99 | 7.58  |       |       |       |      |      |     |   |    |      |       |     |     |      |       |      |       |       |       |      |      | 100   | 97           |
| S25    | 3    | 41       | Spl           |        | 0.64  | 38.00 | 22.38 |       | 14.57 |       |       |      |      |     |   |    |      | 24.42 |     |     |      |       |      |       |       |       |      |      | 100   | 98           |
| S25    | 3    | 42       | Chr           |        |       | 10.68 | 29.21 |       | 6.07  |       |       |      |      |     |   |    |      | 54.04 |     |     |      |       |      |       |       |       |      |      | 100   | 97           |
| S25    | 3.1  | 1        | Ilm           |        | 51.17 |       | 43.03 | 5.80  |       |       |       |      |      |     |   |    |      |       |     |     |      |       |      |       |       |       |      |      | 100   | 103          |
| S25    | 3.1  | 2        | TiO2          |        | 98.93 |       | 1.07  |       |       |       |       |      |      |     |   |    |      |       |     |     |      |       |      |       |       |       |      |      | 100   | 106          |
| S25    | 3.1  | 3        | Ilm           |        | 53.41 |       | 40.54 | 6.05  |       |       |       |      |      |     |   |    |      |       |     |     |      |       |      |       |       |       |      |      | 100   | 105          |
| S25    | 3.1  | 4        | TiO2          |        | 99.15 |       | 0.85  |       |       |       |       |      |      |     |   |    |      |       |     |     |      |       |      |       |       |       |      |      | 100   | 107          |
| S25    | 3.2  | 1        | Zrn           | 30.82  |       |       | 1.31  |       |       |       |       |      |      |     |   |    |      |       |     |     |      | 67.87 |      |       |       |       |      |      | 100   | 122          |
| S25    | 3.2  | 2        | Ep            | 40.32  |       | 27.79 | 6.16  |       |       | 22.73 |       |      |      |     |   |    |      |       |     |     |      |       |      |       |       |       |      |      | 97    | 111          |
| S25    | 3.2  | 3        | Qz            | 99.30  |       |       | 0.70  |       |       |       |       |      |      |     |   |    |      |       |     |     |      |       |      |       |       |       |      |      | 100   | 122          |
| S25    | 3.2  | 4        | "Chr"         |        | 1.87  | 14.04 | 47.93 |       | 4.39  |       |       |      |      |     |   |    | 0.70 | 31.08 |     |     |      |       |      |       |       |       |      |      | 100   | 104          |
| S25    | 3.2  | 5        | Ep            | 39.78  |       | 20.93 | 14.42 |       |       | 21.86 |       |      |      |     |   |    |      |       |     |     |      |       |      |       |       |       |      |      | 97    | 110          |
| S25    | 3.2  | 6        | Chr           |        |       | 12.13 | 18.10 |       | 11.08 |       |       |      |      |     |   |    |      | 58.69 |     |     |      |       |      |       |       |       |      |      | 100   | 107          |
| S25    | 3.2  | 7        | Feohy +       | 8.98   |       | 2.87  | 80.90 |       | 0.93  | 0.38  |       |      | 1.38 |     |   |    |      |       |     |     |      |       |      |       |       |       |      | 4.55 | 100   | 76           |
| S25    | 4    | 1        | TiO2 +        | 5.82   | 82.36 | 4.02  | 4.69  |       | 3.11  |       |       |      |      |     |   |    |      |       |     |     |      |       |      |       |       |       |      |      | 100   | 99           |
| S25    | 4    | 2        | Feohy +       | 6.47   |       |       | 93.53 |       |       |       |       |      |      |     |   |    |      |       |     |     |      |       |      |       |       |       |      |      | 100   | 74           |
| S25    | 4    | 3        | Mix           | 55.04  | 36.11 | 5.52  | 0.66  |       |       |       |       | 2.68 |      |     |   |    |      |       |     |     |      |       |      |       |       |       |      |      | 100   | 107          |
| S25    | 4    | 4        | Qz            | 100.00 |       |       |       |       |       |       |       |      |      |     |   |    |      |       |     |     |      |       |      |       |       |       |      |      | 100   | 126          |
| S25    | 4    | 5        | TiO2 + Qz     | 30.36  | 69.64 |       |       |       |       |       |       |      |      |     |   |    |      |       |     |     |      |       |      |       |       |       |      |      | 100   | 120          |
| S25    | 4    | 6        | Opx           | 55.65  |       | 4.12  | 5.42  |       | 31.44 | 2.60  |       |      |      |     |   |    |      | 0.77  |     |     |      |       |      |       |       |       |      |      | 100   | 123          |
| S25    | 4    | 7        | Spl           |        |       | 39.39 | 16.75 |       | 15.62 |       |       |      |      |     |   |    |      | 28.25 |     |     |      |       |      |       |       |       |      |      | 100   | 111          |
| S25    | 4    | 8        | "Ilm"         | 0.63   | 90.42 | 0.39  | 6.81  | 0.69  |       |       |       |      |      |     |   |    |      | 1.05  |     |     |      |       |      |       |       |       |      |      | 100   | 107          |
| S25    | 4    | 9        | Ol (Fayalite) | 29.10  |       | 0.82  | 70.08 |       |       |       |       |      |      |     |   |    |      |       |     |     |      |       |      |       |       |       |      |      | 100   | 94           |
| S25    | 4    | 10       | Chr           |        |       | 13.78 | 18.84 |       | 10.84 |       |       |      |      |     |   |    |      | 56.54 |     |     |      |       |      |       |       |       |      |      | 100   | 115          |
| S25    | 4    | 11       | Opx           | 56.46  |       | 3.74  | 5.33  |       | 32.30 | 1.19  |       |      |      |     |   |    |      | 0.98  |     |     |      |       |      |       |       |       |      |      | 100   | 123          |
| S25    | 4    | 12       | Spl +         | 2.83   | 0.31  | 50.95 | 12.22 |       | 19.64 |       |       |      |      |     |   |    |      | 14.05 |     |     |      |       |      |       |       |       |      |      | 100   | 123          |
| S25    | 4    | 13       | Ilm +         |        | 51.00 |       | 46.18 | 0.77  | 2.04  |       |       |      |      |     |   |    |      |       |     |     |      |       |      |       |       |       |      |      | 100   | 113          |
| S25    | 4    | 14       | Ilm           |        | 51.49 |       | 45.30 | 2.42  |       | 0.79  |       |      |      |     |   |    |      |       |     |     |      |       |      |       |       |       |      |      | 100   | 108          |
| S25    | 4    | 15       | Chr           |        |       | 16.33 | 17.14 |       | 13.32 |       |       |      |      |     |   |    |      | 53.20 |     |     |      |       |      |       |       |       |      |      | 100   | 108          |
| S25    | 4    | 16       | Chr           |        |       | 10.24 | 17.88 |       | 11.64 |       |       |      |      |     |   |    |      | 60.24 |     |     |      |       |      |       |       |       |      |      | 100   | 108          |
| S25    | 4    | 17       | Ilm +         | 2.00   | 58.45 | 0.91  | 35.06 | 3.58  |       |       |       |      |      |     |   |    |      |       |     |     |      |       |      |       |       |       |      |      | 100   | 100          |
| S25    | 4    | 18       | St            | 30.38  | 0.81  | 55.79 | 11.59 |       | 0.95  |       |       |      |      |     |   |    |      |       |     |     | 0.48 |       |      |       |       |       |      |      | 100   | 114          |
| S25    | 4    | 19       | Feohy +       | 4.02   | 1.03  | 2.86  | 53.90 | 5.01  | 4.21  |       |       |      |      |     |   |    |      | 28.11 |     |     | 0.87 |       |      |       |       |       |      |      | 100   | 97           |
| S25    | 4    | 20       | Ttn           | 33.15  | 36.00 | 1.38  | 1.15  |       |       | 28.31 |       |      |      |     |   |    |      |       |     |     |      |       |      |       |       |       |      |      | 100   | 104          |
| S25    | 4    | 21       | St            | 28.50  |       | 42.81 | 25.22 |       | 3.46  |       |       |      |      |     |   |    |      |       |     |     |      |       |      |       |       |       |      |      | 100   | 94           |
| S25    | 4    | 22       | Ep            | 40.09  |       | 23.94 | 10.55 |       |       | 22.41 |       |      |      |     |   |    |      |       |     |     |      |       |      |       |       |       |      |      | 97    | 98           |
| S25    | 4    | 23       | Chr           |        |       | 28.41 | 18.11 |       | 14.07 |       |       |      |      |     |   |    | 0.49 | 38.93 |     |     |      |       |      |       |       |       |      |      | 100   | 102          |
| S25    | 4    | 24       | Chr + Chl     | 12.21  | 0.62  | 7.98  | 31.05 |       | 17.56 |       |       |      |      |     |   |    | 0.48 | 30.11 |     |     |      |       |      |       |       |       |      |      | 100   | 100          |

Table B13.1: Mineral chemical analyses from sample 25.

| Sample | Site | Position | Mineral            | SiO2  | TiO2  | Al2O3 | FeO   | MnO  | MgO   | CaO   | Na2O  | K2O  | P2O5 | SO3 | F    | Cl   | V2O5 | Cr2O3 | NiO | CuO | ZnO   | ZrO2 | Ag2O | La2O3 | Ce2O3 | Nd2O3 | HfO2 | WO3 | Total | Actual Total |
|--------|------|----------|--------------------|-------|-------|-------|-------|------|-------|-------|-------|------|------|-----|------|------|------|-------|-----|-----|-------|------|------|-------|-------|-------|------|-----|-------|--------------|
| S25    | 4    | 25       | Opx                | 56.06 |       | 3.61  | 5.70  |      | 33.61 | 0.44  |       |      |      |     |      |      |      | 0.58  |     |     |       |      |      |       |       |       |      | 100 | 111   |              |
| S25    | 4    | 26       | Ilm +              | 2.17  | 50.87 |       | 42.64 | 2.64 |       | 1.69  |       |      |      |     |      |      |      |       |     |     |       |      |      |       |       |       |      | 100 | 96    |              |
| S25    | 4    | 27       | Tur                | 39.04 | 0.64  | 31.27 | 3.82  |      | 9.19  | 0.83  | 2.21  |      |      |     |      |      |      |       |     |     |       |      |      |       |       |       |      | 87  | 87    |              |
| S25    | 4    | 28       | Ep                 | 40.40 |       | 22.22 | 12.01 | 0.37 |       | 22.01 |       |      |      |     |      |      |      |       |     |     |       |      |      |       |       |       |      | 97  | 95    |              |
| S25    | 4    | 29       | Chr                |       |       | 9.93  | 20.85 |      | 8.66  |       |       |      |      |     |      |      |      | 60.56 |     |     |       |      |      |       |       |       |      | 100 | 94    |              |
| S25    | 4    | 30       | Ep +               | 46.17 |       | 25.98 | 1.74  |      | 3.43  | 20.63 | 2.05  |      |      |     |      |      |      |       |     |     |       |      |      |       |       |       |      | 100 | 95    |              |
| S25    | 4    | 31       | Chr                |       |       | 10.63 | 21.34 |      | 9.26  |       |       |      |      |     |      |      | 0.50 | 58.27 |     |     |       |      |      |       |       |       |      | 100 | 93    |              |
| S25    | 4    | 32       | Ep                 | 40.31 | 0.36  | 23.58 | 10.74 |      |       | 22.01 |       |      |      |     |      |      |      |       |     |     |       |      |      |       |       |       |      | 97  | 104   |              |
| S25    | 4    | 33       | Ilm                |       | 53.70 |       | 44.05 | 2.25 |       |       |       |      |      |     |      |      |      |       |     |     |       |      |      |       |       |       |      | 100 | 103   |              |
| S25    | 4    | 34       | Grt                | 40.22 | 0.35  | 20.91 | 26.77 | 0.63 | 3.01  | 8.10  |       |      |      |     |      |      |      |       |     |     |       |      |      |       |       |       |      | 100 | 108   |              |
| S25    | 4    | 35       | Chr                |       | 0.41  | 12.50 | 27.27 |      | 8.75  |       |       |      |      |     |      |      |      | 51.06 |     |     |       |      |      |       |       |       |      | 100 | 102   |              |
| S25    | 4    | 36       | Chr                |       |       | 25.94 | 16.07 |      | 13.72 |       |       |      |      |     |      |      |      | 44.27 |     |     |       |      |      |       |       |       |      | 100 | 104   |              |
| S25    | 4.1  | 1        | Chl +              | 36.92 |       | 17.59 | 30.71 |      | 11.31 |       | 0.63  | 2.84 |      |     |      |      |      |       |     |     |       |      |      |       |       |       |      | 100 | 92    |              |
| S25    | 4.1  | 2        | Feohy +            | 25.81 |       | 8.98  | 58.97 |      | 2.48  | 0.68  |       | 2.20 | 0.87 |     |      |      |      |       |     |     |       |      |      |       |       |       |      | 100 | 84    |              |
| S25    | 4.1  | 3        | Ab                 | 67.15 |       | 18.66 | 2.42  |      |       | 0.56  | 11.21 |      |      |     |      |      |      |       |     |     |       |      |      |       |       |       |      | 100 | 119   |              |
| S25    | 4.1  | 4        | TiO <sub>2</sub>   |       | 98.94 |       | 1.06  |      |       |       |       |      |      |     |      |      |      |       |     |     |       |      |      |       |       |       |      | 100 | 106   |              |
| S25    | 4.1  | 5        | Chl +              | 36.63 | 0.51  | 20.23 | 22.50 | 0.42 | 17.12 |       |       | 2.59 |      |     |      |      |      |       |     |     |       |      |      |       |       |       |      | 100 | 88    |              |
| S25    | 4.1  | 6        | "Ilm"              |       | 84.96 |       | 12.90 | 2.14 |       |       |       |      |      |     |      |      |      |       |     |     |       |      |      |       |       |       |      | 100 | 104   |              |
| S25    | 4.1  | 7        | Chl +              | 35.69 | 1.47  | 19.57 | 23.89 | 0.64 | 17.31 |       |       | 1.42 |      |     |      |      |      |       |     |     |       |      |      |       |       |       |      | 100 | 87    |              |
| S25    | 4.1  | 8        | Ep                 | 40.42 |       | 24.04 | 10.18 |      |       | 22.37 |       |      |      |     |      |      |      |       |     |     |       |      |      |       |       |       |      | 97  | 110   |              |
| S25    | 5    | 1        | Ep                 | 40.10 |       | 26.57 | 7.55  |      |       | 22.78 |       |      |      |     |      |      |      |       |     |     |       |      |      |       |       |       |      | 97  | 103   |              |
| S25    | 5    | 2        | Chr +              | 10.24 |       | 4.89  | 36.59 | 5.22 | 11.37 |       |       |      |      |     |      | 0.49 |      | 31.19 |     |     |       |      |      |       |       |       |      | 100 | 39    |              |
| S25    | 5    | 3        | Spl                |       | 0.42  | 32.28 | 23.96 |      | 13.22 |       |       |      |      |     |      |      |      | 30.12 |     |     |       |      |      |       |       |       |      | 100 | 107   |              |
| S25    | 5    | 4        | Ilm + Chl          | 16.45 | 45.23 | 12.42 | 17.26 |      | 8.19  |       | 0.45  |      |      |     |      |      |      |       |     |     |       |      |      |       |       |       |      | 100 | 109   |              |
| S25    | 5    | 5        | TiO <sub>2</sub> + | 2.37  | 97.63 |       |       |      |       |       |       |      |      |     |      |      |      |       |     |     |       |      |      |       |       |       |      | 100 | 108   |              |
| S25    | 5    | 6        | Spl                |       |       | 40.10 | 16.71 |      | 15.87 |       |       |      |      |     |      |      |      | 27.32 |     |     |       |      |      |       |       |       |      | 100 | 109   |              |
| S25    | 5    | 7        | Tur                | 38.81 | 0.74  | 31.47 | 4.32  |      | 8.66  | 0.44  | 2.57  |      |      |     |      |      |      |       |     |     |       |      |      |       |       |       |      | 87  | 98    |              |
| S25    | 5    | 8        | Spl                |       |       | 39.69 | 16.35 |      | 16.85 |       |       |      |      |     |      |      |      | 27.11 |     |     |       |      |      |       |       |       |      | 100 | 102   |              |
| S25    | 5    | 9        | TiO <sub>2</sub>   |       | 98.96 |       | 0.53  |      |       |       |       |      |      |     |      |      |      | 0.51  |     |     |       |      |      |       |       |       |      | 100 | 75    |              |
| S25    | 5    | 10       | Ilm                |       | 47.31 |       | 50.57 | 2.12 |       |       |       |      |      |     |      |      |      |       |     |     |       |      |      |       |       |       |      | 100 | 93    |              |
| S25    | 5    | 11       | Ilm                |       | 39.21 |       | 57.76 | 1.12 | 1.91  |       |       |      |      |     |      |      |      |       |     |     |       |      |      |       |       |       |      | 100 | 91    |              |
| S25    | 5    | 12       | "Ilm"              |       | 84.28 |       | 15.06 | 0.66 |       |       |       |      |      |     |      |      |      |       |     |     |       |      |      |       |       |       |      | 100 | 98    |              |
| S25    | 5    | 13       | Ep                 | 39.92 |       | 21.52 | 13.21 |      |       | 22.35 |       |      |      |     |      |      |      |       |     |     |       |      |      |       |       |       |      | 97  | 105   |              |
| S25    | 5    | 14       | Ilm                |       | 49.54 |       | 49.15 | 0.54 | 0.77  |       |       |      |      |     |      |      |      |       |     |     |       |      |      |       |       |       |      | 100 | 101   |              |
| S25    | 5    | 15       | Amph               | 55.54 |       | 2.58  | 11.48 |      | 15.78 | 11.14 | 0.49  |      |      |     |      |      |      |       |     |     |       |      |      |       |       |       |      | 97  | 101   |              |
| S25    | 5    | 16       | Chl                | 28.21 |       | 20.06 | 26.01 | 0.62 | 8.30  | 0.88  | 0.92  |      |      |     |      |      |      |       |     |     |       |      |      |       |       |       |      | 85  | 86    |              |
| S25    | 5    | 17       | Chr                |       | 0.42  | 27.94 | 24.13 |      | 11.38 |       |       |      |      |     |      |      |      | 36.13 |     |     |       |      |      |       |       |       |      | 100 | 94    |              |
| S25    | 6    | 1        | Grt                | 39.73 |       | 20.80 | 32.15 | 1.39 | 3.84  | 2.10  |       |      |      |     |      |      |      |       |     |     |       |      |      |       |       |       |      | 100 | 112   |              |
| S25    | 6    | 2        | Ep                 | 40.53 | 0.33  | 27.44 | 6.09  |      |       | 22.61 |       |      |      |     |      |      |      |       |     |     |       |      |      |       |       |       |      | 97  | 111   |              |
| S25    | 6    | 3        | Ilm +              | 7.01  | 61.00 | 2.59  | 19.95 | 7.37 | 0.77  |       |       | 1.31 |      |     |      |      |      |       |     |     |       |      |      |       |       |       |      | 100 | 111   |              |
| S25    | 6    | 4        | Mix                | 72.81 | 10.77 | 6.66  | 6.89  |      | 1.73  |       |       | 1.14 |      |     |      |      |      |       |     |     |       |      |      |       |       |       |      | 100 | 114   |              |
| S25    | 6    | 5        | Ilm +              | 4.13  | 46.77 | 0.72  | 43.86 | 2.73 | 0.97  | 0.82  |       |      |      |     |      |      |      |       |     |     |       |      |      |       |       |       |      | 100 | 112   |              |
| S25    | 6    | 6        | Ep                 | 40.22 |       | 25.90 | 7.99  |      |       | 22.89 |       |      |      |     |      |      |      |       |     |     |       |      |      |       |       |       |      | 97  | 114   |              |
| S25    | 6    | 7        | Tur                | 36.87 | 0.82  | 33.34 | 12.40 |      | 1.50  |       | 2.08  |      |      |     |      |      |      |       |     |     |       |      |      |       |       |       |      | 87  | 95    |              |
| S25    | 6    | 8        | Ep                 | 39.85 |       | 21.16 | 13.57 |      |       | 22.43 |       |      |      |     |      |      |      |       |     |     |       |      |      |       |       |       |      | 97  | 105   |              |
| S25    | 6    | 9        | And                | 37.58 |       | 60.66 | 0.28  |      |       |       |       |      |      |     | 1.48 |      |      |       |     |     |       |      |      |       |       |       |      | 100 | 114   |              |
| S25    | 6    | 10       | Chl                | 27.33 |       | 14.72 | 11.78 |      |       | 29.15 | 0.91  | 1.11 |      |     |      |      |      |       |     |     |       |      |      |       |       |       |      | 85  | 39    |              |
| S25    | 6    | 11       | "Ilm"              |       | 58.57 |       | 37.74 | 3.28 |       | 0.41  |       |      |      |     |      |      |      |       |     |     |       |      |      |       |       |       |      | 100 | 92    |              |
| S25    | 6    | 12       | Ilm                |       | 53.33 |       | 43.63 | 3.04 |       |       |       |      |      |     |      |      |      |       |     |     |       |      |      |       |       |       |      | 100 | 95    |              |
| S25    | 6    | 13       | And                | 38.26 |       | 59.90 | 1.06  |      |       |       |       | 0.78 |      |     |      |      |      |       |     |     |       |      |      |       |       |       |      | 100 | 108   |              |
| S25    | 6    | 14       | Cpx                | 54.75 |       | 2.09  | 4.39  |      | 17.68 | 20.78 |       |      |      |     |      |      |      | 0.31  |     |     |       |      |      |       |       |       |      | 100 | 111   |              |
| S25    | 6    | 15       | Chr                |       |       | 12.55 | 20.51 |      | 9.86  |       |       |      |      |     |      |      |      | 57.08 |     |     |       |      |      |       |       |       |      | 100 | 105   |              |
| S25    | 6    | 16       | Spl                |       | 0.40  | 27.55 | 23.97 |      | 13.00 |       |       |      |      |     |      |      |      | 35.08 |     |     |       |      |      |       |       |       |      | 100 | 108   |              |
| S25    | 6    | 17       | Zrn                | 31.11 |       |       |       |      |       |       |       |      |      |     |      |      |      |       |     |     | 68.89 |      |      |       |       |       |      | 100 | 116   |              |
| S25    | 6    | 18       | Spl                |       |       | 54.89 | 10.01 |      | 20.44 |       |       |      |      |     |      |      |      | 14.66 |     |     |       |      |      |       |       |       |      | 100 | 101   |              |
| S25    | 6    | 19       | Chr                |       |       | 10.18 | 21.02 |      | 10.74 |       |       |      |      |     |      |      |      | 58.06 |     |     |       |      |      |       |       |       |      | 100 | 99    |              |

Table B13.1: Mineral chemical analyses from sample 25.

| Sample | Site | Position | Mineral                 | SiO2  | TiO2  | Al2O3 | FeO   | MnO   | MgO   | CaO   | Na2O  | K2O  | P2O5  | SO3 | F    | Cl   | V2O5 | Cr2O3 | NiO | CuO  | ZnO  | ZrO2 | Ag2O | La2O3 | Ce2O3 | Nd2O3 | HfO2 | WO3 | Total | Actual Total |
|--------|------|----------|-------------------------|-------|-------|-------|-------|-------|-------|-------|-------|------|-------|-----|------|------|------|-------|-----|------|------|------|------|-------|-------|-------|------|-----|-------|--------------|
| S25    | 6    | 20       | Grt                     | 39.43 |       | 20.75 | 32.77 |       | 1.93  | 5.12  |       |      |       |     |      |      |      |       |     |      |      |      |      |       |       |       |      | 100 | 111   |              |
| S25    | 6    | 21       | Ilm                     |       | 54.13 |       | 44.48 | 1.39  |       |       |       |      |       |     |      |      |      |       |     |      |      |      |      |       |       |       |      | 100 | 104   |              |
| S25    | 6    | 22       | Chr                     |       |       | 14.02 | 22.71 |       | 8.25  |       |       |      |       |     |      |      |      | 55.01 |     |      |      |      |      |       |       |       |      | 100 | 111   |              |
| S25    | 6    | 23       | Ap                      |       |       |       | 1.96  |       | 0.44  | 46.94 |       |      | 45.04 |     | 5.21 | 0.42 |      |       |     |      |      |      |      |       |       |       |      | 100 | 126   |              |
| S25    | 6    | 24       | Spl                     |       |       | 34.45 | 16.49 |       | 15.32 |       |       |      |       |     |      |      |      | 33.74 |     |      |      |      |      |       |       |       |      | 100 | 121   |              |
| S25    | 6    | 25       | Feohy +                 | 6.23  |       | 2.82  | 89.17 |       | 0.97  |       |       |      |       |     |      |      |      |       |     | 0.80 |      |      |      |       |       |       |      | 100 | 85    |              |
| S25    | 6    | 26       | Chr                     |       | 0.38  | 14.62 | 25.67 |       | 8.53  |       |       |      |       |     |      |      |      | 50.81 |     |      |      |      |      |       |       |       |      | 100 | 117   |              |
| S25    | 6    | 27       | Ep                      | 47.55 |       | 23.69 | 2.87  |       | 2.46  | 20.43 |       |      |       |     |      |      |      |       |     |      |      |      |      |       |       |       |      | 97  | 111   |              |
| S25    | 6.1  | 1        | Chl                     | 26.16 | 1.18  | 20.26 | 24.61 | 0.34  | 12.44 |       |       |      |       |     |      |      |      |       |     |      |      |      |      |       |       |       |      | 85  | 97    |              |
| S25    | 6.1  | 2        | TiO <sub>2</sub> + Qz   | 38.38 | 59.18 | 0.84  | 1.60  |       |       |       |       |      |       |     |      |      |      |       |     |      |      |      |      |       |       |       |      | 100 | 119   |              |
| S25    | 6.1  | 3        | Qz                      | 99.67 | 0.33  |       |       |       |       |       |       |      |       |     |      |      |      |       |     |      |      |      |      |       |       |       |      | 100 | 123   |              |
| S25    | 6.1  | 4        | Ilm                     |       | 53.99 |       | 40.58 | 5.43  |       |       |       |      |       |     |      |      |      |       |     |      |      |      |      |       |       |       |      | 100 | 108   |              |
| S25    | 6.1  | 5        | Mnz +                   | 25.28 |       | 2.03  | 2.02  |       | 0.77  | 2.02  |       |      | 26.89 |     | 2.39 |      |      |       |     |      |      |      | 1.47 | 8.22  | 21.69 | 7.23  |      | 100 | 105   |              |
| S25    | 7    | 1        | "Chr"                   | 1.19  |       | 0.78  | 59.96 | 0.95  | 1.81  |       |       |      |       |     |      |      |      | 35.32 |     |      |      |      |      |       |       |       |      | 100 | 99    |              |
| S25    | 7    | 2        | Spl                     |       |       | 39.52 | 17.26 |       | 16.00 |       |       |      |       |     |      |      |      | 27.23 |     |      |      |      |      |       |       |       |      | 100 | 108   |              |
| S25    | 7    | 3        | Chr                     |       |       | 24.88 | 19.63 |       | 12.40 |       |       |      |       |     |      |      | 0.50 | 42.60 |     |      |      |      |      |       |       |       |      | 100 | 108   |              |
| S25    | 7    | 4        | Tur                     | 38.11 | 0.71  | 32.72 | 5.02  |       | 7.55  | 0.88  | 2.01  |      |       |     |      |      |      |       |     |      |      |      |      |       |       |       |      | 87  | 101   |              |
| S25    | 7    | 5        | Ep                      | 40.88 |       | 28.23 | 5.53  |       |       | 22.37 |       |      |       |     |      |      |      |       |     |      |      |      |      |       |       |       |      | 97  | 114   |              |
| S25    | 7    | 6        | Ttn                     | 32.19 | 39.14 | 0.35  | 0.90  |       |       | 27.42 |       |      |       |     |      |      |      |       |     |      |      |      |      |       |       |       |      | 100 | 120   |              |
| S25    | 7    | 7        | Ep                      | 40.77 |       | 22.36 | 12.30 | 0.45  |       | 21.12 |       |      |       |     |      |      |      |       |     |      |      |      |      |       |       |       |      | 97  | 123   |              |
| S25    | 7    | 8        | Feohy +                 | 6.45  |       | 1.37  | 89.47 | 0.49  | 0.78  |       |       |      | 1.44  |     |      |      |      |       |     |      |      |      |      |       |       |       |      | 100 | 84    |              |
| S25    | 7    | 9        | Chr                     |       |       | 7.92  | 27.70 |       | 8.58  |       |       |      |       |     |      |      |      | 55.80 |     |      |      |      |      |       |       |       |      | 100 | 112   |              |
| S25    | 7    | 10       | "Ilm" +                 | 2.76  | 67.60 |       | 21.56 | 4.67  |       | 3.40  |       |      |       |     |      |      |      |       |     |      |      |      |      |       |       |       |      | 100 | 69    |              |
| S25    | 7    | 11       | Grt                     | 39.59 |       | 20.81 | 27.13 | 2.57  | 1.39  | 8.51  |       |      |       |     |      |      |      |       |     |      |      |      |      |       |       |       |      | 100 | 115   |              |
| S25    | 7    | 12       | Feohy +                 | 1.87  |       | 2.26  | 95.49 |       |       | 0.39  |       |      |       |     |      |      |      |       |     |      |      |      |      |       |       |       |      | 100 | 87    |              |
| S25    | 7    | 13       | Ep                      | 39.68 |       | 20.69 | 14.30 |       |       | 22.33 |       |      |       |     |      |      |      |       |     |      |      |      |      |       |       |       |      | 97  | 108   |              |
| S25    | 7    | 14       | Opx                     | 56.78 |       | 3.30  | 5.48  |       | 33.32 | 0.45  |       |      |       |     |      |      |      | 0.67  |     |      |      |      |      |       |       |       |      | 100 | 111   |              |
| S25    | 7    | 15       | Spl                     |       |       | 36.22 | 22.90 |       | 12.83 |       |       |      |       |     |      |      |      | 28.05 |     |      |      |      |      |       |       |       |      | 100 | 104   |              |
| S25    | 7    | 16       | TiO <sub>2</sub> +      | 2.19  | 95.50 | 1.22  | 0.63  |       |       |       |       | 0.45 |       |     |      |      |      |       |     |      |      |      |      |       |       |       |      | 100 | 105   |              |
| S25    | 7    | 17       | Ab +                    | 60.71 |       | 9.22  | 13.06 |       | 9.35  | 0.34  | 7.33  |      |       |     |      |      |      |       |     |      |      |      |      |       |       |       |      | 100 | 107   |              |
| S25    | 7    | 18       | Ilm                     |       | 50.43 |       | 47.76 | 1.80  |       |       |       |      |       |     |      |      |      |       |     |      |      |      |      |       |       |       |      | 100 | 98    |              |
| S25    | 7    | 19       | St                      | 30.00 | 0.53  | 54.73 | 11.90 | 0.36  | 1.45  |       |       |      |       |     |      |      |      |       |     | 1.03 |      |      |      |       |       |       |      | 100 | 99    |              |
| S25    | 7    | 20       | Chr                     |       |       | 27.70 | 16.63 |       | 13.92 |       |       |      |       |     |      |      |      | 41.75 |     |      |      |      |      |       |       |       |      | 100 | 101   |              |
| S25    | 7    | 21       | Spl                     |       |       | 40.75 | 14.51 |       | 17.64 |       |       |      |       |     |      |      |      | 27.10 |     |      |      |      |      |       |       |       |      | 100 | 103   |              |
| S25    | 7    | 22       | Chr                     |       |       | 12.07 | 27.51 |       | 8.90  |       |       |      |       |     |      |      |      | 51.52 |     |      |      |      |      |       |       |       |      | 100 | 96    |              |
| S25    | 7    | 23       | And                     | 37.19 |       | 61.12 |       |       |       |       |       |      |       |     | 1.70 |      |      |       |     |      |      |      |      |       |       |       |      | 100 | 111   |              |
| S25    | 7    | 24       | "Chr"                   | 4.15  |       | 4.55  | 41.57 | 11.69 | 5.34  |       |       |      |       |     |      |      |      | 30.88 |     |      | 1.81 |      |      |       |       |       |      | 100 | 100   |              |
| S25    | 7    | 25       | Chr                     |       |       | 25.48 | 18.23 |       | 13.63 |       |       |      |       |     |      |      |      | 42.66 |     |      |      |      |      |       |       |       |      | 100 | 104   |              |
| S25    | 7    | 26       | Chr                     |       |       | 15.05 | 25.16 |       | 9.82  |       |       |      |       |     |      |      |      | 49.97 |     |      |      |      |      |       |       |       |      | 100 | 104   |              |
| S25    | 7    | 27       | Ep +                    | 46.37 |       | 26.50 | 1.41  |       | 3.28  | 19.67 | 1.18  |      |       |     | 1.60 |      |      |       |     |      |      |      |      |       |       |       |      | 100 | 108   |              |
| S25    | 7.1  | 1        | Chl                     | 31.64 |       | 17.81 | 2.54  |       | 31.54 | 0.30  |       |      |       |     |      |      |      | 1.17  |     |      |      |      |      |       |       |       |      | 85  | 103   |              |
| S25    | 7.1  | 2        | Spl                     |       |       | 33.79 | 21.81 |       | 12.22 |       |       |      |       |     |      |      |      | 32.18 |     |      |      |      |      |       |       |       |      | 100 | 111   |              |
| S25    | 7.1  | 3        | Chr + Chl               | 5.87  | 0.86  | 10.94 | 29.29 | 0.89  | 9.11  |       | 0.44  |      |       |     |      |      |      | 42.60 |     |      |      |      |      |       |       |       |      | 100 | 95    |              |
| S25    | 7.1  | 4        | "Chr"                   |       |       | 3.81  | 82.71 |       | 2.28  |       |       |      |       |     |      |      |      | 11.20 |     |      |      |      |      |       |       |       |      | 100 | 95    |              |
| S25    | 8    | 1        | TiO <sub>2</sub> + Qz   | 48.38 | 51.62 |       |       |       |       |       |       |      |       |     |      |      |      |       |     |      |      |      |      |       |       |       |      | 100 | 106   |              |
| S25    | 8    | 2        | Chr                     |       |       | 18.18 | 20.69 |       | 11.29 |       |       |      |       |     |      |      |      | 49.84 |     |      |      |      |      |       |       |       |      | 100 | 107   |              |
| S25    | 8    | 3        | Qz +                    | 92.34 | 0.34  | 4.44  | 1.74  |       | 0.82  |       | 0.32  |      |       |     |      |      |      |       |     |      |      |      |      |       |       |       |      | 100 | 113   |              |
| S25    | 8    | 4        | Opx                     | 56.58 |       | 3.62  | 5.76  |       | 33.01 | 0.41  |       |      |       |     |      |      |      | 0.62  |     |      |      |      |      |       |       |       |      | 100 | 117   |              |
| S25    | 8    | 5        | TiO <sub>2</sub> + Qz   | 23.41 | 76.16 |       | 0.43  |       |       |       |       |      |       |     |      |      |      |       |     |      |      |      |      |       |       |       |      | 100 | 117   |              |
| S25    | 8    | 6        | Chr                     |       |       | 14.97 | 20.46 |       | 10.39 |       |       |      |       |     |      |      |      | 54.19 |     |      |      |      |      |       |       |       |      | 100 | 112   |              |
| S25    | 8    | 7        | Spl                     |       |       | 44.51 | 12.05 |       | 18.60 |       |       |      |       |     |      |      |      | 24.83 |     |      |      |      |      |       |       |       |      | 100 | 114   |              |
| S25    | 8    | 8        | Olig + TiO <sub>2</sub> | 62.82 | 4.64  | 15.89 | 0.53  |       |       | 3.89  | 9.95  |      |       |     |      |      |      |       |     |      | 2.28 |      |      |       |       |       |      | 100 | 119   |              |
| S25    | 8    | 9        | Chr                     |       |       | 10.19 | 20.58 |       | 9.22  |       |       |      |       |     |      |      |      | 60.02 |     |      |      |      |      |       |       |       |      | 100 | 109   |              |
| S25    | 8    | 10       | Ab                      | 68.10 |       | 18.64 | 0.52  |       |       | 0.42  | 10.97 | 1.35 |       |     |      |      |      |       |     |      |      |      |      |       |       |       |      | 100 | 120   |              |
| S25    | 8    | 11       | Mix                     | 20.28 | 23.61 | 2.36  | 38.78 |       | 1.61  | 13.36 |       |      |       |     |      |      |      |       |     |      |      |      |      |       |       |       |      | 100 | 103   |              |
| S25    | 8    | 12       | Opx                     | 56.70 |       | 3.36  | 5.55  |       | 33.29 | 0.49  |       |      |       |     |      |      |      | 0.61  |     |      |      |      |      |       |       |       |      | 100 | 115   |              |



Table B13.1: Mineral chemical analyses from sample 25.

| Sample | Site | Position | Mineral               | SiO2  | TiO2  | Al2O3 | FeO   | MnO  | MgO   | CaO   | Na2O  | K2O  | P2O5 | SO3 | F    | Cl | V2O5 | Cr2O3 | NiO | CuO | ZnO | ZrO2  | Ag2O | La2O3 | Ce2O3 | Nd2O3 | HfO2 | WO3 | Total | Actual Total |
|--------|------|----------|-----------------------|-------|-------|-------|-------|------|-------|-------|-------|------|------|-----|------|----|------|-------|-----|-----|-----|-------|------|-------|-------|-------|------|-----|-------|--------------|
| S25    | 8    | 13       | Ep                    | 40.36 |       | 23.90 | 10.51 |      |       | 22.22 |       |      |      |     |      |    |      |       |     |     |     |       |      |       |       |       |      | 97  | 103   |              |
| S25    | 8    | 14       | Grt                   | 40.92 |       | 22.28 | 1.17  |      | 0.48  | 35.15 |       |      |      |     |      |    |      |       |     |     |     |       |      |       |       |       |      | 100 | 104   |              |
| S25    | 8    | 15       | Spl                   |       | 0.37  | 31.58 | 18.03 |      | 15.39 |       |       |      |      |     |      |    |      | 34.63 |     |     |     |       |      |       |       |       |      | 100 | 101   |              |
| S25    | 8    | 16       | And                   | 36.63 |       | 60.06 | 0.29  |      |       |       |       |      |      |     | 3.01 |    |      |       |     |     |     |       |      |       |       |       |      | 100 | 113   |              |
| S25    | 8    | 17       | St                    | 29.05 |       | 44.71 | 20.83 |      | 5.41  |       |       |      |      |     |      |    |      |       |     |     |     |       |      |       |       |       |      | 100 | 97    |              |
| S25    | 8    | 18       | "Chr"                 |       | 0.62  | 2.09  | 60.14 |      | 2.44  |       |       |      |      |     |      |    |      | 34.70 |     |     |     |       |      |       |       |       |      | 100 | 93    |              |
| S25    | 8    | 19       | Ilm                   |       | 53.20 |       | 38.10 | 7.42 |       |       |       |      |      |     |      |    | 1.27 |       |     |     |     |       |      |       |       |       |      | 100 | 97    |              |
| S25    | 8    | 20       | Ttn                   | 31.18 | 39.45 | 0.83  | 2.93  |      |       | 25.60 |       |      |      |     |      |    |      |       |     |     |     |       |      |       |       |       |      | 100 | 105   |              |
| S25    | 8    | 21       | Chr + Chl             | 10.57 |       | 19.94 | 24.04 | 0.87 | 15.91 |       | 0.49  |      |      |     |      |    |      | 28.18 |     |     |     |       |      |       |       |       |      | 100 | 101   |              |
| S25    | 8    | 22       | Ab                    | 69.79 |       | 18.66 |       |      |       |       | 11.56 |      |      |     |      |    |      |       |     |     |     |       |      |       |       |       |      | 100 | 119   |              |
| S25    | 8    | 23       | Ilm                   |       | 52.70 |       | 45.76 | 1.54 |       |       |       |      |      |     |      |    |      |       |     |     |     |       |      |       |       |       |      | 100 | 109   |              |
| S25    | 8    | 24       | Ep                    | 40.07 |       | 24.67 | 9.87  |      |       | 22.39 |       |      |      |     |      |    |      |       |     |     |     |       |      |       |       |       |      | 97  | 116   |              |
| S25    | 8    | 25       | Grt                   | 39.35 |       | 20.97 | 28.16 | 2.12 |       | 9.40  |       |      |      |     |      |    |      |       |     |     |     |       |      |       |       |       |      | 100 | 117   |              |
| S25    | 8    | 26       | Chr                   |       | 0.47  | 23.01 | 27.48 |      | 10.59 |       |       |      |      |     |      |    |      | 38.45 |     |     |     |       |      |       |       |       |      | 100 | 114   |              |
| S25    | 8    | 27       | Chr                   |       |       | 8.53  | 26.12 |      | 8.09  |       |       |      |      |     |      |    |      | 57.25 |     |     |     |       |      |       |       |       |      | 100 | 110   |              |
| S25    | 8    | 28       | Chr                   |       |       | 13.32 | 21.68 |      | 11.12 |       |       |      |      |     |      |    |      | 53.89 |     |     |     |       |      |       |       |       |      | 100 | 115   |              |
| S25    | 8    | 29       | Ep                    | 41.75 |       | 27.06 | 1.19  |      | 3.76  | 23.23 |       |      |      |     |      |    |      |       |     |     |     |       |      |       |       |       |      | 97  | 115   |              |
| S25    | 8    | 30       | Grt                   | 39.58 |       | 20.78 | 27.79 | 0.68 | 1.85  | 9.31  |       |      |      |     |      |    |      |       |     |     |     |       |      |       |       |       |      | 100 | 119   |              |
| S25    | 8    | 31       | Ttn                   | 28.15 | 43.81 | 0.49  | 2.19  |      |       | 24.18 |       |      |      |     |      |    | 1.19 |       |     |     |     |       |      |       |       |       |      | 100 | 113   |              |
| S25    | 8    | 32       | "Ilm" +               | 3.72  | 66.07 |       | 26.35 | 1.66 |       | 2.19  |       |      |      |     |      |    |      |       |     |     |     |       |      |       |       |       |      | 100 | 103   |              |
| S25    | 8    | 33       | Ilm                   |       | 52.34 |       | 44.90 | 2.76 |       |       |       |      |      |     |      |    |      |       |     |     |     |       |      |       |       |       |      | 100 | 94    |              |
| S25    | 8    | 34       | Chr + Chl             | 6.65  | 0.38  | 12.03 | 28.30 |      | 10.46 |       |       |      |      |     |      |    |      | 42.18 |     |     |     |       |      |       |       |       |      | 100 | 97    |              |
| S25    | 8.1  | 1        | Ilm                   |       | 53.55 |       | 43.19 | 3.26 |       |       |       |      |      |     |      |    |      |       |     |     |     |       |      |       |       |       |      | 100 | 106   |              |
| S25    | 8.1  | 2        | TiO <sub>2</sub> +    | 2.74  | 94.16 | 1.10  | 1.66  |      |       |       |       | 0.34 |      |     |      |    |      |       |     |     |     |       |      |       |       |       |      | 100 | 102   |              |
| S25    | 8.1  | 3        | TiO <sub>2</sub> +    | 2.14  | 97.14 |       | 0.72  |      |       |       |       |      |      |     |      |    |      |       |     |     |     |       |      |       |       |       |      | 100 | 106   |              |
| S25    | 8.1  | 4        | Qz                    | 99.13 | 0.62  |       | 0.25  |      |       |       |       |      |      |     |      |    |      |       |     |     |     |       |      |       |       |       |      | 100 | 121   |              |
| S25    | 8.1  | 5        | TiO <sub>2</sub>      |       | 98.81 |       | 1.19  |      |       |       |       |      |      |     |      |    |      |       |     |     |     |       |      |       |       |       |      | 100 | 106   |              |
| S25    | 8.2  | 1        | Zrn                   | 31.43 |       |       |       |      |       |       |       |      |      |     |      |    |      |       |     |     |     | 68.57 |      |       |       |       |      | 100 | 122   |              |
| S25    | 8.2  | 2        | Ab                    | 74.58 |       | 15.37 |       |      |       | 0.40  | 9.65  |      |      |     |      |    |      |       |     |     |     |       |      |       |       |       |      | 100 | 113   |              |
| S25    | 8.2  | 3        | Zrn                   | 31.17 |       | 0.56  | 0.55  |      |       |       |       |      |      |     |      |    |      |       |     |     |     | 65.69 |      |       |       | 2.04  |      | 100 | 117   |              |
| S25    | 8.2  | 4        | TiO2 +                | 16.09 | 69.53 | 1.19  | 0.41  |      |       | 12.78 |       |      |      |     |      |    |      |       |     |     |     |       |      |       |       |       |      | 100 | 112   |              |
| S25    | 8.2  | 5        | Ilm                   |       | 51.11 |       | 42.28 | 6.60 |       |       |       |      |      |     |      |    |      |       |     |     |     |       |      |       |       |       |      | 100 | 106   |              |
| S25    | 8.2  | 6        | Ttn                   | 32.51 | 38.46 | 0.71  | 1.12  |      |       | 27.20 |       |      |      |     |      |    |      |       |     |     |     |       |      |       |       |       |      | 100 | 111   |              |
| S25    | 8.2  | 7        | TiO <sub>2</sub>      | 0.75  | 96.12 |       | 2.54  |      |       | 0.60  |       |      |      |     |      |    |      |       |     |     |     |       |      |       |       |       |      | 100 | 95    |              |
| S25    | 8.2  | 8        | TiO <sub>2</sub> +    | 0.63  | 95.23 |       | 3.57  |      |       | 0.57  |       |      |      |     |      |    |      |       |     |     |     |       |      |       |       |       |      | 100 | 108   |              |
| S25    | 8.2  | 9        | Ilm                   |       | 51.38 |       | 46.02 | 2.60 |       |       |       |      |      |     |      |    |      |       |     |     |     |       |      |       |       |       |      | 100 | 106   |              |
| S25    | 9    | 1        | Chr                   |       |       | 3.42  | 22.28 |      | 7.53  |       |       |      |      |     |      |    |      | 66.77 |     |     |     |       |      |       |       |       |      | 100 | 104   |              |
| S25    | 9    | 2        | Ep                    | 40.50 |       | 24.37 | 9.57  | 0.33 |       | 22.22 |       |      |      |     |      |    |      |       |     |     |     |       |      |       |       |       |      | 97  | 108   |              |
| S25    | 9    | 3        | Chr                   |       | 0.68  | 23.92 | 25.07 |      | 9.90  |       |       |      |      |     |      |    |      | 40.42 |     |     |     |       |      |       |       |       |      | 100 | 103   |              |
| S25    | 9    | 4        | Grt                   | 39.44 |       | 20.86 | 29.03 | 4.76 | 2.29  | 3.62  |       |      |      |     |      |    |      |       |     |     |     |       |      |       |       |       |      | 100 | 107   |              |
| S25    | 9    | 5        | Ilm                   |       | 52.69 |       | 42.72 | 4.16 |       | 0.43  |       |      |      |     |      |    |      |       |     |     |     |       |      |       |       |       |      | 100 | 99    |              |
| S25    | 9    | 6        | Grt                   | 39.65 |       | 22.66 | 1.70  |      | 0.60  | 33.20 |       |      |      |     | 2.19 |    |      |       |     |     |     |       |      |       |       |       |      | 100 | 114   |              |
| S25    | 9    | 7        | Feohy +               | 8.40  |       | 2.50  | 87.85 |      |       |       |       |      | 1.25 |     |      |    |      |       |     |     |     |       |      |       |       |       |      | 100 | 79    |              |
| S25    | 9    | 8        | Qz + TiO <sub>2</sub> | 61.37 | 36.77 |       | 1.86  |      |       |       |       |      |      |     |      |    |      |       |     |     |     |       |      |       |       |       |      | 100 | 120   |              |
| S25    | 9    | 9        | Ilm                   |       | 52.59 |       | 43.60 | 3.81 |       |       |       |      |      |     |      |    |      |       |     |     |     |       |      |       |       |       |      | 100 | 107   |              |
| S25    | 9    | 10       | Zrn                   | 31.31 |       |       |       |      |       |       |       |      |      |     |      |    |      |       |     |     |     | 68.69 |      |       |       |       |      | 100 | 124   |              |
| S25    | 9    | 11       | Cpx                   | 54.66 |       | 3.07  | 1.85  |      | 17.05 | 22.62 |       |      |      |     |      |    |      | 0.75  |     |     |     |       |      |       |       |       |      | 100 | 122   |              |
| S25    | 9    | 12       | Opx                   | 56.14 |       | 4.08  | 5.52  |      | 32.46 | 0.99  |       |      |      |     |      |    |      | 0.82  |     |     |     |       |      |       |       |       |      | 100 | 124   |              |
| S25    | 9    | 13       | Chr                   |       |       | 6.65  | 21.89 |      | 8.17  |       |       |      |      |     |      |    |      | 63.29 |     |     |     |       |      |       |       |       |      | 100 | 118   |              |
| S25    | 9    | 14       | Amph                  | 43.58 | 0.67  | 15.29 | 14.15 | 0.30 | 10.40 | 10.82 | 1.41  | 0.38 |      |     |      |    |      |       |     |     |     |       |      |       |       |       |      | 97  | 117   |              |
| S25    | 9    | 15       | Chr                   |       | 0.60  | 26.13 | 23.22 |      | 11.29 |       |       |      |      |     |      |    | 0.43 | 38.33 |     |     |     |       |      |       |       |       |      | 100 | 113   |              |
| S25    | 9    | 16       | Ep                    | 41.34 |       | 27.80 | 2.06  |      | 2.43  | 23.37 |       |      |      |     |      |    |      |       |     |     |     |       |      |       |       |       |      | 97  | 104   |              |
| S25    | 9    | 17       | Ttn                   | 32.99 | 37.05 | 1.15  | 1.37  |      |       | 27.44 |       |      |      |     |      |    |      |       |     |     |     |       |      |       |       |       |      | 100 | 109   |              |
| S25    | 9    | 18       | Chr                   |       |       | 19.71 | 21.47 |      | 10.66 |       |       |      |      |     |      |    | 0.46 | 47.70 |     |     |     |       |      |       |       |       |      | 100 | 108   |              |
| S25    | 9    | 19       | Ilm                   |       | 52.97 |       | 43.35 | 3.68 |       |       |       |      |      |     |      |    |      |       |     |     |     |       |      |       |       |       |      | 100 | 107   |              |
| S25    | 9    | 20       | Spl                   |       |       | 44.41 | 15.26 |      | 17.50 |       |       |      |      |     |      |    |      | 22.83 |     |     |     |       |      |       |       |       |      | 100 | 106   |              |

Table B13.1: Mineral chemical analyses from sample 25.

| Sample | Site | Position | Mineral               | SiO2  | TiO2   | Al2O3 | FeO   | MnO   | MgO   | CaO   | Na2O | K2O  | P2O5 | SO3 | F     | Cl | V2O5 | Cr2O3 | NiO  | CuO | ZnO  | ZrO2  | Ag2O | La2O3 | Ce2O3 | Nd2O3 | HfO2 | WO3  | Total | Actual Total |
|--------|------|----------|-----------------------|-------|--------|-------|-------|-------|-------|-------|------|------|------|-----|-------|----|------|-------|------|-----|------|-------|------|-------|-------|-------|------|------|-------|--------------|
| S25    | 9    | 21       | Grt                   | 39.25 | 0.32   | 20.65 | 17.82 | 14.08 | 0.80  | 7.09  |      |      |      |     |       |    |      |       |      |     |      |       |      |       |       |       |      |      | 100   | 104          |
| S25    | 9    | 22       | Chr                   |       |        | 19.21 | 21.01 |       | 9.10  |       |      |      |      |     |       |    |      | 50.68 |      |     |      |       |      |       |       |       |      |      | 100   | 104          |
| S25    | 9    | 23       | TiO <sub>2</sub> +    | 1.45  | 86.38  | 2.28  | 6.16  |       |       | 0.29  | 0.55 |      | 0.59 |     |       |    |      | 0.98  |      |     |      |       |      |       |       |       |      | 1.31 | 100   | 93           |
| S25    | 9    | 24       | Ep                    | 40.23 |        | 24.15 | 10.05 | 0.36  |       | 22.22 |      |      |      |     |       |    |      |       |      |     |      |       |      |       |       |       |      |      | 97    | 104          |
| S25    | 9    | 25       | Spl                   |       |        | 55.53 | 11.54 |       | 20.26 |       |      |      |      |     |       |    |      | 12.67 |      |     |      |       |      |       |       |       |      |      | 100   | 102          |
| S25    | 9    | 26       | TiO <sub>2</sub>      |       | 99.53  |       | 0.47  |       |       |       |      |      |      |     |       |    |      |       |      |     |      |       |      |       |       |       |      |      | 100   | 97           |
| S25    | 9    | 27       | Chr                   |       |        | 29.94 | 17.99 |       | 14.40 |       |      |      |      |     |       |    |      | 37.66 |      |     |      |       |      |       |       |       |      |      | 100   | 98           |
| S25    | 9    | 28       | Spl                   |       |        | 47.44 | 14.92 |       | 18.07 |       |      |      |      |     |       |    |      | 19.19 | 0.39 |     |      |       |      |       |       |       |      |      | 100   | 98           |
| S25    | 9    | 29       | Spl                   | 41.66 |        | 26.38 | 8.56  |       |       | 23.39 |      |      |      |     |       |    |      |       |      |     |      |       |      |       |       |       |      |      | 100   | 97           |
| S25    | 10   | 1        | TiO <sub>2</sub> + Qz | 18.38 | 81.62  |       |       |       |       |       |      |      |      |     |       |    |      |       |      |     |      |       |      |       |       |       |      |      | 100   | 99           |
| S25    | 10   | 2        | Ilm                   |       | 49.21  |       | 47.83 | 2.96  |       |       |      |      |      |     |       |    |      |       |      |     |      |       |      |       |       |       |      |      | 100   | 97           |
| S25    | 10   | 3        | Grt                   | 39.80 |        | 20.88 | 30.25 | 0.50  | 2.07  | 6.49  |      |      |      |     |       |    |      |       |      |     |      |       |      |       |       |       |      |      | 100   | 107          |
| S25    | 10   | 4        | Chr                   |       |        | 22.17 | 24.19 |       | 11.20 |       |      |      |      |     |       |    |      | 42.44 |      |     |      |       |      |       |       |       |      |      | 100   | 103          |
| S25    | 10   | 5        | Spl                   |       |        | 48.58 | 13.87 |       | 18.53 |       |      |      |      |     |       |    |      | 19.02 |      |     |      |       |      |       |       |       |      |      | 100   | 108          |
| S25    | 10   | 6        | Chr                   |       |        | 12.29 | 20.12 |       | 9.91  |       |      |      |      |     |       |    | 0.58 | 57.11 |      |     |      |       |      |       |       |       |      |      | 100   | 108          |
| S25    | 10   | 7        | Spl                   |       |        | 25.62 | 22.81 |       | 11.67 |       |      |      |      |     |       |    |      | 39.89 |      |     |      |       |      |       |       |       |      |      | 100   | 110          |
| S25    | 10   | 8        | Spl                   |       | 0.63   | 31.26 | 19.62 |       | 14.32 |       |      |      |      |     |       |    |      | 34.17 |      |     |      |       |      |       |       |       |      |      | 100   | 111          |
| S25    | 10   | 9        | Chr +                 | 18.17 | 0.40   | 14.44 | 19.37 |       | 20.36 |       | 0.51 |      |      |     |       |    |      | 26.74 |      |     |      |       |      |       |       |       |      |      | 100   | 107          |
| S25    | 10   | 10       | Ep                    | 45.33 |        | 23.70 | 6.86  |       |       | 21.12 |      |      |      |     |       |    |      |       |      |     |      |       |      |       |       |       |      |      | 97    | 115          |
| S25    | 10   | 11       | Ilm                   |       | 52.39  |       | 41.54 | 5.59  |       | 0.48  |      |      |      |     |       |    |      |       |      |     |      |       |      |       |       |       |      |      | 100   | 109          |
| S25    | 10   | 12       | Grt                   | 40.02 |        | 20.88 | 26.24 | 2.05  | 1.82  | 8.99  |      |      |      |     |       |    |      |       |      |     |      |       |      |       |       |       |      |      | 100   | 113          |
| S25    | 10   | 13       | Chr                   |       |        | 11.69 | 18.82 |       | 10.57 |       |      |      |      |     |       |    | 0.50 | 58.43 |      |     |      |       |      |       |       |       |      |      | 100   | 105          |
| S25    | 10   | 14       | Ilm                   |       | 53.58  |       | 37.15 | 9.27  |       |       |      |      |      |     |       |    |      |       |      |     |      |       |      |       |       |       |      |      | 100   | 103          |
| S25    | 10   | 15       | Fe-Chr                |       |        | 1.84  | 45.40 | 0.96  | 1.46  |       |      |      |      |     |       |    |      | 50.35 |      |     |      |       |      |       |       |       |      |      | 100   | 89           |
| S25    | 10   | 16       | Feohy +               |       | 10.51  | 2.66  | 83.04 | 1.96  | 1.82  |       |      |      |      |     |       |    |      |       |      |     |      |       |      |       |       |       |      |      | 100   | 89           |
| S25    | 10   | 17       | And                   | 38.50 |        | 60.85 | 0.64  |       |       |       |      |      |      |     |       |    |      |       |      |     |      |       |      |       |       |       |      |      | 100   | 99           |
| S25    | 10   | 18       | TiO <sub>2</sub>      |       | 100.00 |       |       |       |       |       |      |      |      |     |       |    |      |       |      |     |      |       |      |       |       |       |      |      | 100   | 97           |
| S25    | 10   | 19       | Qz +                  | 91.80 |        | 3.19  | 2.77  |       | 0.69  |       |      | 1.55 |      |     |       |    |      |       |      |     |      |       |      |       |       |       |      |      | 100   | 110          |
| S25    | 10   | 20       | Chr + Chl             | 5.29  |        | 4.14  | 0.93  | 0.47  |       | 45.17 |      |      |      |     | 43.12 |    |      |       |      |     |      |       |      |       |       |       |      |      | 100   | 106          |
| S25    | 10   | 21       | And                   | 38.22 |        | 61.46 | 0.32  |       |       |       |      |      |      |     |       |    |      |       |      |     |      |       |      |       |       |       |      |      | 100   | 102          |
| S25    | 10   | 22       | Grt                   | 39.41 |        | 20.83 | 32.91 | 0.60  | 1.33  | 4.93  |      |      |      |     |       |    |      |       |      |     |      |       |      |       |       |       |      |      | 100   | 102          |
| S25    | 10   | 23       | Chr                   |       |        | 11.09 | 19.58 |       | 8.92  |       |      |      |      |     |       |    |      | 60.42 |      |     |      |       |      |       |       |       |      |      | 100   | 97           |
| S25    | 10   | 24       | Chr                   |       |        | 12.91 | 19.26 |       | 10.03 |       |      |      |      |     |       |    | 0.45 | 57.35 |      |     |      |       |      |       |       |       |      |      | 100   | 91           |
| S25    | 10   | 25       | Ilm                   |       | 52.98  |       | 43.02 | 1.79  | 1.64  |       |      |      |      |     |       |    |      | 0.57  |      |     |      |       |      |       |       |       |      |      | 100   | 98           |
| S25    | 10   | 26       | Ilm +                 | 8.84  | 59.71  | 2.58  | 26.29 | 1.12  | 0.94  |       | 0.52 |      |      |     |       |    |      |       |      |     |      |       |      |       |       |       |      |      | 100   | 75           |
| S25    | 10.1 | 1        | Spl                   |       |        | 38.13 | 14.60 |       | 16.46 |       |      |      |      |     |       |    |      | 30.31 |      |     | 0.50 |       |      |       |       |       |      |      | 100   | 107          |
| S25    | 10.1 | 2        | Chl + Chr             | 12.30 |        | 8.41  | 30.84 |       | 13.19 |       |      |      |      |     |       |    |      | 35.26 |      |     |      |       |      |       |       |       |      |      | 100   | 96           |
| S25    | 10.1 | 3        | Chl                   | 34.18 |        | 14.38 | 2.95  |       | 32.88 |       |      |      |      |     |       |    |      | 0.60  |      |     |      |       |      |       |       |       |      |      | 85    | 98           |
| S25    | 11   | 1        | Chr                   |       |        | 21.44 | 18.26 |       | 12.53 |       |      |      |      |     |       |    |      | 47.76 |      |     |      |       |      |       |       |       |      |      | 100   | 106          |
| S25    | 11   | 2        | Chr                   |       |        | 17.15 | 21.33 |       | 10.56 |       |      |      |      |     |       |    | 0.43 | 50.53 |      |     |      |       |      |       |       |       |      |      | 100   | 107          |
| S25    | 11   | 3        | Grt                   | 39.32 |        | 20.62 | 29.88 | 4.24  | 1.18  | 4.76  |      |      |      |     |       |    |      |       |      |     |      |       |      |       |       |       |      |      | 100   | 114          |
| S25    | 11   | 4        | Mix                   | 27.04 | 26.76  | 19.22 | 18.30 | 3.00  | 1.38  |       |      | 4.30 |      |     |       |    |      |       |      |     |      |       |      |       |       |       |      |      | 100   | 117          |
| S25    | 11   | 5        | Ep                    | 40.07 |        | 23.21 | 11.40 |       |       | 22.33 |      |      |      |     |       |    |      |       |      |     |      |       |      |       |       |       |      |      | 97    | 116          |
| S25    | 11   | 6        | Ttn                   | 28.75 | 45.22  | 0.67  | 1.83  | 0.37  |       | 23.16 |      |      |      |     |       |    |      |       |      |     |      |       |      |       |       |       |      |      | 100   | 121          |
| S25    | 11   | 7        | "Chr"                 |       | 1.05   | 15.89 | 43.24 |       | 4.88  |       |      |      |      |     |       |    |      | 34.95 |      |     |      |       |      |       |       |       |      |      | 100   | 115          |
| S25    | 11   | 8        | Opx                   | 55.77 |        | 4.40  | 5.66  |       | 32.87 | 0.39  |      |      |      |     |       |    |      | 0.91  |      |     |      |       |      |       |       |       |      |      | 100   | 127          |
| S25    | 11   | 9        | Chr                   |       |        | 9.87  | 20.51 |       | 9.49  |       |      |      |      |     |       |    | 0.45 | 59.68 |      |     |      |       |      |       |       |       |      |      | 100   | 116          |
| S25    | 11   | 10       | TiO <sub>2</sub>      |       | 100.00 |       |       |       |       |       |      |      |      |     |       |    |      |       |      |     |      |       |      |       |       |       |      |      | 100   | 113          |
| S25    | 11   | 11       | Ilm                   |       | 53.04  |       | 45.47 | 1.50  |       |       |      |      |      |     |       |    |      |       |      |     |      |       |      |       |       |       |      |      | 100   | 107          |
| S25    | 11   | 12       | Chr                   |       |        | 14.12 | 19.74 |       | 10.79 |       |      |      |      |     |       |    |      | 55.35 |      |     |      |       |      |       |       |       |      |      | 100   | 102          |
| S25    | 11   | 13       | Ep                    | 40.08 |        | 22.64 | 8.48  |       | 3.33  | 22.47 |      |      |      |     |       |    |      |       |      |     |      |       |      |       |       |       |      |      | 97    | 97           |
| S25    | 11   | 14       | Ttn                   | 32.18 | 37.48  | 1.36  | 1.23  |       |       | 27.75 |      |      |      |     |       |    |      |       |      |     |      |       |      |       |       |       |      |      | 100   | 106          |
| S25    | 11   | 15       | Chr                   |       |        | 20.98 | 17.68 |       | 12.00 |       |      |      |      |     |       |    | 0.47 | 48.87 |      |     |      |       |      |       |       |       |      |      | 100   | 107          |
| S25    | 11   | 16       | Chr                   |       |        | 18.03 | 17.00 |       | 10.27 |       |      |      |      |     |       |    |      | 54.70 |      |     |      |       |      |       |       |       |      |      | 100   | 103          |
| S25    | 11   | 17       | Feohy +               | 4.32  |        | 2.11  | 92.13 |       | 0.83  |       |      |      |      |     |       |    |      | 0.62  |      |     |      |       |      |       |       |       |      |      | 100   | 76           |
| S25    | 11   | 18       | Zrn                   | 31.03 |        |       |       |       |       |       |      |      |      |     |       |    |      |       |      |     |      | 68.97 |      |       |       |       |      |      | 100   | 113          |

Table B13.1: Mineral chemical analyses from sample 25.

| Sample | Site | Position | Mineral     | SiO2   | TiO2  | Al2O3 | FeO   | MnO   | MgO    | CaO   | Na2O  | K2O  | P2O5  | SO3 | F    | Cl | V2O5 | Cr2O3 | NiO  | CuO  | ZnO | ZrO2  | Ag2O | La2O3 | Ce2O3 | Nd2O3 | HfO2 | WO3  | Total | Actual Total |
|--------|------|----------|-------------|--------|-------|-------|-------|-------|--------|-------|-------|------|-------|-----|------|----|------|-------|------|------|-----|-------|------|-------|-------|-------|------|------|-------|--------------|
| S25    | 11   | 19       | Spl         |        |       | 45.29 | 14.64 |       | 17.86  |       |       |      |       |     |      |    |      | 22.21 |      |      |     |       |      |       |       |       |      |      | 100   | 109          |
| S25    | 11   | 20       | Ap +        | 18.38  |       | 3.79  | 1.24  |       | 0.54   | 37.98 |       | 0.63 | 33.24 |     | 4.19 |    |      |       |      |      |     |       |      |       |       |       |      |      | 100   | 113          |
| S25    | 11   | 21       | TiO2 +      | 1.02   | 98.45 |       | 0.53  |       |        |       |       |      |       |     |      |    |      |       |      |      |     |       |      |       |       |       |      |      | 100   | 99           |
| S25    | 11   | 22       | Qz          | 100.00 |       |       |       |       |        |       |       |      |       |     |      |    |      |       |      |      |     |       |      |       |       |       |      |      | 100   | 109          |
| S25    | 11   | 23       | Ep          | 40.51  |       | 22.86 | 11.74 |       |        | 21.89 |       |      |       |     |      |    |      |       |      |      |     |       |      |       |       |       |      |      | 100   | 99           |
| S25    | 11   | 24       | Ilm         |        | 49.85 |       | 48.56 | 1.59  |        |       |       |      |       |     |      |    |      |       |      |      |     |       |      |       |       |       |      |      | 100   | 96           |
| S25    | 11   | 25       | "Ilm"       |        | 60.97 |       | 36.53 | 2.50  |        |       |       |      |       |     |      |    |      |       |      |      |     |       |      |       |       |       |      |      | 100   | 89           |
| S25    | 11   | 26       | Ep          | 39.99  |       | 24.78 | 9.49  |       |        | 22.74 |       |      |       |     |      |    |      |       |      |      |     |       |      |       |       |       |      |      | 100   | 107          |
| S25    | 11   | 27       | Opx         | 56.07  |       | 4.04  | 5.51  |       | 33.23  | 0.28  |       |      |       |     |      |    |      | 0.87  |      |      |     |       |      |       |       |       |      |      | 100   | 120          |
| S25    | 11   | 28       | Chr         |        |       | 17.14 | 21.44 |       | 10.85  |       |       |      |       |     |      |    |      | 50.58 |      |      |     |       |      |       |       |       |      |      | 100   | 110          |
| S25    | 11   | 29       | Opx         | 56.25  |       | 4.01  | 5.44  |       | 32.96  | 0.43  |       |      |       |     |      |    |      | 0.91  |      |      |     |       |      |       |       |       |      |      | 100   | 120          |
| S25    | 11   | 30       | Spl         |        |       | 31.59 | 18.88 |       | 14.47  |       |       |      |       |     |      |    |      | 35.06 |      |      |     |       |      |       |       |       |      |      | 100   | 112          |
| S25    | 11   | 31       | Feohy +     | 4.58   |       | 1.04  | 94.38 |       |        |       |       |      |       |     |      |    |      |       |      |      |     |       |      |       |       |       |      |      | 100   | 82           |
| S25    | 11   | 32       | Chr         |        |       | 14.34 | 19.46 |       | 11.49  |       |       |      |       |     |      |    |      | 54.70 |      |      |     |       |      |       |       |       |      |      | 100   | 112          |
| S25    | 11   | 33       | Ilm         |        | 53.87 |       | 45.56 | 0.57  |        |       |       |      |       |     |      |    |      |       |      |      |     |       |      |       |       |       |      |      | 100   | 102          |
| S25    | 11   | 34       | Mgohy       |        |       |       |       |       | 100.00 |       |       |      |       |     |      |    |      |       |      |      |     |       |      |       |       |       |      |      | 100   | 46           |
| S25    | 11.1 | 1        | Chr         |        | 0.60  | 8.33  | 31.74 |       | 3.17   |       |       |      |       |     |      |    |      | 55.42 |      | 0.74 |     |       |      |       |       |       |      |      | 100   | 104          |
| S25    | 11.1 | 2        | Grt         | 38.88  |       | 16.84 | 3.66  |       | 37.94  |       |       |      |       |     |      |    |      | 2.68  |      |      |     |       |      |       |       |       |      |      | 100   | 103          |
| S25    | 11.1 | 3        | Chl + Ms    | 32.78  |       | 17.76 | 29.67 | 0.37  | 12.47  |       | 0.67  | 3.26 |       |     |      |    |      |       |      |      |     |       |      |       |       |       |      | 3.01 | 100   | 94           |
| S25    | 11.1 | 4        | TiO2 +      | 11.50  | 70.85 | 8.47  | 5.34  |       | 2.43   |       |       | 1.41 |       |     |      |    |      |       |      |      |     |       |      |       |       |       |      |      | 100   | 108          |
| S25    | 11.1 | 5        | Qz          | 99.47  |       |       | 0.53  |       |        |       |       |      |       |     |      |    |      |       |      |      |     |       |      |       |       |       |      |      | 100   | 120          |
| S25    | 11.1 | 6        | "Ilm"       |        | 65.25 |       | 32.07 | 1.63  |        | 1.05  |       |      |       |     |      |    |      |       |      |      |     |       |      |       |       |       |      |      | 100   | 99           |
| S25    | 11.1 | 7        | Ttn         | 33.47  | 28.32 | 7.11  | 1.42  |       |        | 26.92 |       |      |       |     | 2.76 |    |      |       |      |      |     |       |      |       |       |       |      |      | 100   | 114          |
| S25    | 11.1 | 8        | Ab          | 67.89  |       | 19.52 | 0.33  |       |        | 1.43  | 10.84 |      |       |     |      |    |      |       |      |      |     |       |      |       |       |       |      |      | 100   | 120          |
| S25    | 11.1 | 9        | Chl         | 27.46  | 0.45  | 19.33 | 24.57 |       | 13.18  |       |       |      |       |     |      |    |      |       |      |      |     |       |      |       |       |       |      |      | 85    | 99           |
| S25    | 11.1 | 10       | Zrn +       | 37.16  | 1.18  |       | 0.41  |       |        | 0.95  |       |      |       |     |      |    |      |       |      |      |     | 60.30 |      |       |       |       |      |      | 100   | 121          |
| S25    | 12   | 1        | Ep          | 40.54  |       | 28.29 | 5.69  |       |        | 22.47 |       |      |       |     |      |    |      |       |      |      |     |       |      |       |       |       |      |      | 100   | 97           |
| S25    | 12   | 2        | Grt         | 39.66  |       | 21.11 | 28.89 | 0.78  | 1.69   | 7.86  |       |      |       |     |      |    |      |       |      |      |     |       |      |       |       |       |      |      | 100   | 114          |
| S25    | 12   | 3        | Ep          | 40.36  |       | 25.94 | 7.99  |       |        | 22.71 |       |      |       |     |      |    |      |       |      |      |     |       |      |       |       |       |      |      | 100   | 97           |
| S25    | 12   | 4        | Chr +       | 9.24   |       | 6.93  | 23.58 |       | 8.35   |       | 0.59  |      |       |     |      |    |      | 51.31 |      |      |     |       |      |       |       |       |      |      | 100   | 98           |
| S25    | 12   | 5        | "Ilm"       | 0.89   | 80.66 |       | 16.80 |       |        |       |       |      |       |     |      |    |      |       |      |      |     |       |      |       |       |       |      | 1.65 | 100   | 100          |
| S25    | 12   | 6        | Ep          | 41.16  |       | 28.68 | 2.00  |       | 1.59   | 23.57 |       |      |       |     |      |    |      |       |      |      |     |       |      |       |       |       |      |      | 100   | 97           |
| S25    | 12   | 7        | Chr         |        |       | 16.57 | 18.08 |       | 12.18  |       |       |      |       |     |      |    | 0.47 | 52.70 |      |      |     |       |      |       |       |       |      |      | 100   | 111          |
| S25    | 12   | 8        | Grt         | 39.45  |       | 20.63 | 34.78 | 1.46  | 2.74   | 0.96  |       |      |       |     |      |    |      |       |      |      |     |       |      |       |       |       |      |      | 100   | 118          |
| S25    | 12   | 9        | Chr +       | 4.68   | 0.52  | 5.02  | 42.69 | 2.34  | 4.76   |       | 0.63  |      |       |     |      |    |      | 37.95 |      | 1.42 |     |       |      |       |       |       |      |      | 100   | 103          |
| S25    | 12   | 10       | Ep          | 40.40  |       | 27.17 | 6.58  |       |        | 22.85 |       |      |       |     |      |    |      |       |      |      |     |       |      |       |       |       |      |      | 100   | 97           |
| S25    | 12   | 11       | Chr         |        |       | 9.31  | 23.42 |       | 9.42   |       |       |      |       |     |      |    |      | 57.85 |      |      |     |       |      |       |       |       |      |      | 100   | 116          |
| S25    | 12   | 12       | Opx         | 57.90  |       | 1.07  | 5.61  |       | 34.02  | 0.88  |       |      |       |     |      |    |      | 0.52  |      |      |     |       |      |       |       |       |      |      | 100   | 127          |
| S25    | 12   | 13       | Grt         | 39.45  |       | 20.78 | 20.43 | 13.70 | 1.12   | 4.52  |       |      |       |     |      |    |      |       |      |      |     |       |      |       |       |       |      |      | 100   | 121          |
| S25    | 12   | 14       | Spl         |        |       | 43.97 | 14.27 |       | 17.55  |       |       |      |       |     |      |    |      | 24.21 |      |      |     |       |      |       |       |       |      |      | 100   | 115          |
| S25    | 12   | 15       | Chr         |        |       | 9.68  | 30.05 |       | 4.40   |       |       |      |       |     |      |    |      | 55.87 |      |      |     |       |      |       |       |       |      |      | 100   | 108          |
| S25    | 12   | 16       | Grt         | 39.40  |       | 20.83 | 33.69 | 0.41  | 4.00   | 1.68  |       |      |       |     |      |    |      |       |      |      |     |       |      |       |       |       |      |      | 100   | 110          |
| S25    | 12   | 17       | Opx         | 55.82  |       | 4.03  | 5.53  |       | 33.35  | 0.52  |       |      |       |     |      |    |      | 0.74  |      |      |     |       |      |       |       |       |      |      | 100   | 111          |
| S25    | 12   | 18       | Spl         |        |       | 51.91 | 11.79 |       | 20.00  |       |       |      |       |     |      |    |      | 15.92 | 0.39 |      |     |       |      |       |       |       |      |      | 100   | 106          |
| S25    | 12   | 19       | Ep          | 40.62  |       | 27.58 | 5.53  |       |        | 22.97 |       |      |       |     |      |    |      | 0.30  |      |      |     |       |      |       |       |       |      |      | 100   | 97           |
| S25    | 12   | 20       | Ilm         |        | 52.08 |       | 47.07 | 0.84  |        |       |       |      |       |     |      |    |      |       |      |      |     |       |      |       |       |       |      |      | 100   | 103          |
| S25    | 12   | 21       | Ep          | 41.21  |       | 26.30 | 7.13  |       |        | 22.37 |       |      |       |     |      |    |      |       |      |      |     |       |      |       |       |       |      |      | 100   | 97           |
| S25    | 12   | 22       | Chr + Chl   | 7.12   | 0.61  | 6.71  | 29.07 | 1.28  | 9.67   |       |       |      |       |     |      |    |      | 45.56 |      |      |     |       |      |       |       |       |      |      | 100   | 107          |
| S25    | 12   | 23       | Spl         | 1.70   |       | 49.23 | 11.76 |       | 18.90  | 2.05  |       |      |       |     |      |    |      | 16.37 |      |      |     |       |      |       |       |       |      |      | 100   | 110          |
| S25    | 12   | 24       | Feohy +     | 4.96   |       | 1.17  | 88.48 |       | 1.23   |       |       |      |       |     |      |    |      |       |      |      |     |       |      |       |       |       |      | 4.16 | 100   | 76           |
| S25    | 12   | 25       | Spl         |        |       | 31.42 | 18.93 |       | 14.40  |       |       |      |       |     |      |    |      | 35.25 |      |      |     |       |      |       |       |       |      |      | 100   | 106          |
| S25    | 12   | 26       | "Chr"       |        | 2.80  | 16.64 | 35.85 |       | 7.80   |       |       |      |       |     |      |    | 0.53 | 36.38 |      |      |     |       |      |       |       |       |      |      | 100   | 102          |
| S25    | 12   | 27       | Opx         | 56.09  |       | 3.93  | 5.49  |       | 33.39  | 0.31  |       |      |       |     |      |    |      | 0.79  |      |      |     |       |      |       |       |       |      |      | 100   | 104          |
| S25    | 12   | 28       | Qz +        | 93.03  | 6.97  |       |       |       |        |       |       |      |       |     |      |    |      |       |      |      |     |       |      |       |       |       |      |      | 100   | 108          |
| S25    | 12   | 29       | Chr         |        |       | 11.25 | 21.13 |       | 9.46   |       |       |      |       |     |      |    |      | 58.16 |      |      |     |       |      |       |       |       |      |      | 100   | 99           |
| S25    | 12   | 30       | Feohv + Chl | 6.09   |       | 3.88  | 69.09 | 6.88  | 2.10   | 0.61  | 1.58  |      |       |     |      |    |      | 0.48  |      |      |     |       |      |       |       |       |      | 9.30 | 100   | 73           |

Table B13.1: Mineral chemical analyses from sample 25.

| Sample | Site | Position | Mineral               | SiO2  | TiO2   | Al2O3 | FeO   | MnO  | MgO   | CaO   | Na2O | K2O  | P2O5  | SO3  | F    | Cl | V2O5 | Cr2O3 | NiO | CuO | ZnO  | ZrO2  | Ag2O | La2O3 | Ce2O3 | Nd2O3 | HfO2 | WO3  | Total | Actual Total |
|--------|------|----------|-----------------------|-------|--------|-------|-------|------|-------|-------|------|------|-------|------|------|----|------|-------|-----|-----|------|-------|------|-------|-------|-------|------|------|-------|--------------|
| S25    | 12   | 31       | Chr                   |       |        | 18.06 | 19.42 |      | 11.18 |       |      |      |       |      |      |    |      | 51.34 |     |     |      |       |      |       |       |       |      |      | 100   | 112          |
| S25    | 13   | 1        | Opx                   | 56.21 |        | 3.55  | 5.89  |      | 33.41 | 0.35  |      |      |       |      |      |    |      | 0.59  |     |     |      |       |      |       |       |       |      |      | 100   | 109          |
| S25    | 13   | 2        | Feohy +               | 2.40  |        | 0.91  | 94.26 |      |       |       |      |      |       |      |      |    |      |       |     |     |      |       |      |       |       |       |      | 2.43 | 100   | 83           |
| S25    | 13   | 3        | Ilm                   |       | 51.36  | 0.55  | 43.03 | 4.07 | 0.99  |       |      |      |       |      |      |    |      |       |     |     |      |       |      |       |       |       |      |      | 100   | 100          |
| S25    | 13   | 4        | Ep                    | 39.78 | 0.38   | 22.89 | 11.41 | 0.49 |       | 22.05 |      |      |       |      |      |    |      |       |     |     |      |       |      |       |       |       |      |      | 97    | 103          |
| S25    | 13   | 5        | Ilm                   |       | 48.28  |       | 48.27 | 3.46 |       |       |      |      |       |      |      |    |      |       |     |     |      |       |      |       |       |       |      |      | 100   | 95           |
| S25    | 13   | 6        | Chr +                 | 0.94  | 0.45   | 9.72  | 27.38 |      | 7.78  | 1.04  |      |      |       |      |      |    |      | 52.68 |     |     |      |       |      |       |       |       |      |      | 100   | 82           |
| S25    | 13   | 7        | St                    | 30.17 | 0.80   | 53.90 | 11.86 |      | 2.24  |       |      |      |       |      |      |    |      |       |     |     | 1.02 |       |      |       |       |       |      |      | 100   | 106          |
| S25    | 13   | 8        | Ilm                   |       | 53.65  |       | 44.63 | 1.72 |       |       |      |      |       |      |      |    |      |       |     |     |      |       |      |       |       |       |      |      | 100   | 98           |
| S25    | 13   | 9        | Spl                   |       |        | 28.11 | 18.89 |      | 13.53 |       |      |      |       |      |      |    |      | 39.48 |     |     |      |       |      |       |       |       |      |      | 100   | 101          |
| S25    | 13   | 10       | St                    | 29.81 | 0.70   | 53.66 | 13.09 | 0.28 | 2.45  |       |      |      |       |      |      |    |      |       |     |     |      |       |      |       |       |       |      |      | 100   | 110          |
| S25    | 13   | 11       | Chr                   |       |        | 10.07 | 19.11 |      | 10.44 |       |      |      |       |      |      |    |      | 60.38 |     |     |      |       |      |       |       |       |      |      | 100   | 110          |
| S25    | 13   | 12       | Ep                    | 40.42 |        | 27.16 | 6.75  |      |       | 22.67 |      |      |       |      |      |    |      |       |     |     |      |       |      |       |       |       |      |      | 97    | 114          |
| S25    | 13   | 13       | Zrn                   | 31.27 |        |       |       |      |       |       |      |      |       |      |      |    |      |       |     |     |      | 68.73 |      |       |       |       |      |      | 100   | 123          |
| S25    | 13   | 14       | Ilm +                 | 12.02 | 46.79  |       | 31.18 | 1.61 |       | 8.39  |      |      |       |      |      |    |      |       |     |     |      |       |      |       |       |       |      |      | 100   | 112          |
| S25    | 13   | 15       | Spl                   |       | 0.39   | 32.87 | 21.34 |      | 14.92 |       |      |      |       |      |      |    |      | 30.48 |     |     |      |       |      |       |       |       |      |      | 100   | 115          |
| S25    | 13   | 16       | "Ilm"                 |       | 59.33  |       | 39.13 | 1.54 |       |       |      |      |       |      |      |    |      |       |     |     |      |       |      |       |       |       |      |      | 100   | 107          |
| S25    | 13   | 17       | TiO <sub>2</sub> + Qz | 17.74 | 81.89  |       | 0.37  |      |       |       |      |      |       |      |      |    |      |       |     |     |      |       |      |       |       |       |      |      | 100   | 114          |
| S25    | 13   | 18       | Spl                   |       | 0.41   | 30.04 | 18.12 |      | 15.28 |       |      |      |       |      |      |    |      | 36.15 |     |     |      |       |      |       |       |       |      |      | 100   | 111          |
| S25    | 13   | 19       | Feohy +               | 3.85  |        | 1.06  | 92.85 |      | 0.63  | 0.45  |      |      | 1.17  |      |      |    |      |       |     |     |      |       |      |       |       |       |      |      | 100   | 81           |
| S25    | 13   | 20       | Mix                   | 60.12 |        | 15.64 | 8.42  |      |       | 15.83 |      |      |       |      |      |    |      |       |     |     |      |       |      |       |       |       |      |      | 100   | 110          |
| S25    | 13   | 21       | Ilm +                 | 4.41  | 57.02  |       | 33.00 | 1.82 |       | 3.74  |      |      |       |      |      |    |      |       |     |     |      |       |      |       |       |       |      |      | 100   | 104          |
| S25    | 13   | 22       | Chr                   |       |        | 13.89 | 19.95 |      | 10.60 |       |      |      |       |      |      |    | 0.53 | 55.04 |     |     |      |       |      |       |       |       |      |      | 100   | 105          |
| S25    | 13   | 23       | Ep                    | 40.18 |        | 24.68 | 9.16  |      |       | 22.98 |      |      |       |      |      |    |      |       |     |     |      |       |      |       |       |       |      |      | 97    | 103          |
| S25    | 13   | 24       | Ep                    | 36.17 |        | 19.18 | 22.22 |      |       | 19.43 |      |      |       |      |      |    |      |       |     |     |      |       |      |       |       |       |      |      | 97    | 106          |
| S25    | 13   | 25       | Ilm +                 | 4.66  | 51.18  |       | 32.68 | 8.17 |       | 3.31  |      |      |       |      |      |    |      |       |     |     |      |       |      |       |       |       |      |      | 100   | 102          |
| S25    | 13.1 | 1        | Qz                    | 99.40 |        | 0.60  |       |      |       |       |      |      |       |      |      |    |      |       |     |     |      |       |      |       |       |       |      |      | 100   | 117          |
| S25    | 13.1 | 2        | TiO <sub>2</sub> +    | 2.47  | 95.90  | 0.82  | 0.82  |      |       |       |      |      |       |      |      |    |      |       |     |     |      |       |      |       |       |       |      |      | 100   | 104          |
| S25    | 13.1 | 3        | Mix                   | 68.98 | 24.18  | 0.78  | 0.65  |      |       | 0.89  |      |      | 2.65  |      |      |    |      |       |     |     |      |       |      |       | 1.87  |       |      |      | 100   | 104          |
| S25    | 13.1 | 4        | Mnz +                 | 2.69  |        | 2.74  |       |      |       | 4.12  |      | 0.66 | 34.80 | 6.75 | 0.12 |    |      |       |     |     |      |       | 1.89 |       | 27.51 | 14.01 |      | 4.71 | 100   | 83           |
| S25    | 14   | 1        | Spl                   |       |        | 39.09 | 14.65 |      | 16.60 |       |      |      |       |      |      |    |      | 29.65 |     |     |      |       |      |       |       |       |      |      | 100   | 105          |
| S25    | 14   | 2        | Chr                   |       |        | 12.11 | 21.41 |      | 9.23  |       |      |      |       |      |      |    |      | 57.24 |     |     |      |       |      |       |       |       |      |      | 100   | 104          |
| S25    | 14   | 3        | Amph                  | 54.49 |        | 1.82  | 15.93 | 0.63 | 13.21 | 10.91 |      |      |       |      |      |    |      |       |     |     |      |       |      |       |       |       |      |      | 97    | 107          |
| S25    | 14   | 4        | Opx                   | 57.71 |        | 1.58  | 5.30  |      | 33.85 | 0.84  |      |      |       |      |      |    |      | 0.71  |     |     |      |       |      |       |       |       |      |      | 100   | 120          |
| S25    | 14   | 5        | Chr                   |       |        | 22.99 | 18.46 |      | 12.87 |       |      |      |       |      |      |    |      | 45.68 |     |     |      |       |      |       |       |       |      |      | 100   | 113          |
| S25    | 14   | 6        | Ms + TiO <sub>2</sub> | 51.11 | 24.06  | 16.85 | 0.51  |      | 0.34  |       | 0.95 | 4.42 |       |      | 1.76 |    |      |       |     |     |      |       |      |       |       |       |      |      | 100   | 118          |
| S25    | 14   | 7        | Ilm                   |       | 52.71  |       | 44.29 | 3.00 |       |       |      |      |       |      |      |    |      |       |     |     |      |       |      |       |       |       |      |      | 100   | 107          |
| S25    | 14   | 8        | Amph                  | 46.20 | 0.66   | 12.30 | 14.24 |      | 10.82 | 10.81 | 1.64 | 0.34 |       |      |      |    |      |       |     |     |      |       |      |       |       |       |      |      | 97    | 113          |
| S25    | 14   | 9        | Chr                   |       |        | 7.65  | 24.60 |      | 8.01  |       |      |      |       |      |      |    |      | 59.74 |     |     |      |       |      |       |       |       |      |      | 100   | 107          |
| S25    | 14   | 10       | Feohy +               | 10.28 |        | 3.82  | 82.69 |      | 0.89  |       |      | 1.46 | 0.86  |      |      |    |      |       |     |     |      |       |      |       |       |       |      |      | 100   | 62           |
| S25    | 14   | 11       | Chr                   |       |        | 23.79 | 16.54 |      | 13.49 |       |      |      |       |      |      |    |      | 46.18 |     |     |      |       |      |       |       |       |      |      | 100   | 101          |
| S25    | 14   | 12       | St                    | 28.95 |        | 44.34 | 20.14 |      | 6.57  |       |      |      |       |      |      |    |      |       |     |     |      |       |      |       |       |       |      |      | 100   | 92           |
| S25    | 14   | 13       | Feohy +               | 3.41  |        | 1.35  | 95.24 |      |       |       |      |      |       |      |      |    |      |       |     |     |      |       |      |       |       |       |      |      | 100   | 71           |
| S25    | 14   | 14       | Feohy +               | 4.43  |        | 1.14  | 93.09 |      | 0.98  | 0.37  |      |      |       |      |      |    |      |       |     |     |      |       |      |       |       |       |      |      | 100   | 68           |
| S25    | 14   | 15       | Chr                   |       |        | 9.44  | 22.93 |      | 10.08 |       |      |      |       |      |      |    |      | 57.54 |     |     |      |       |      |       |       |       |      |      | 100   | 103          |
| S25    | 14   | 16       | Ep + Ab               | 47.61 |        | 26.35 | 2.23  |      | 1.86  | 19.01 | 2.94 |      |       |      |      |    |      |       |     |     |      |       |      |       |       |       |      |      | 100   | 115          |
| S25    | 14   | 17       | Ep + Ab               | 49.83 |        | 20.23 | 9.62  |      |       | 16.07 | 4.26 |      |       |      |      |    |      |       |     |     |      |       |      |       |       |       |      |      | 100   | 108          |
| S25    | 14   | 18       | Zrn                   | 30.84 |        |       |       |      |       |       |      |      |       |      |      |    |      |       |     |     |      | 67.53 |      |       |       |       | 1.63 |      | 100   | 116          |
| S25    | 14   | 19       | Chr                   |       | 0.48   | 21.40 | 25.70 |      | 10.14 |       |      |      |       |      |      |    |      | 42.28 |     |     |      |       |      |       |       |       |      |      | 100   | 100          |
| S25    | 14   | 20       | Qz                    | 99.38 |        |       | 0.30  |      |       | 0.33  |      |      |       |      |      |    |      |       |     |     |      |       |      |       |       |       |      |      | 100   | 107          |
| S25    | 14   | 21       | St                    | 30.37 | 0.88   | 54.68 | 12.13 |      | 1.24  |       |      |      |       |      |      |    |      |       |     |     | 0.71 |       |      |       |       |       |      |      | 100   | 94           |
| S25    | 14   | 22       | Grt                   | 39.98 |        | 20.50 | 22.69 | 7.53 | 1.11  | 8.19  |      |      |       |      |      |    |      |       |     |     |      |       |      |       |       |       |      |      | 100   | 100          |
| S25    | 14.1 | 1        | TiO <sub>2</sub>      |       | 100.00 |       |       |      |       |       |      |      |       |      |      |    |      |       |     |     |      |       |      |       |       |       |      |      | 100   | 103          |
| S25    | 14.1 | 2        | Zrn                   | 30.87 | 0.88   |       |       |      |       |       |      |      |       |      |      |    |      |       |     |     |      | 68.25 |      |       |       |       |      |      | 100   | 119          |
| S25    | 14.1 | 3        | Ms                    | 47.93 | 0.40   | 33.35 | 2.40  |      | 0.70  |       | 2.60 | 7.62 |       |      |      |    |      |       |     |     |      |       |      |       |       |       |      |      | 95    | 108          |
| S25    | 14.1 | 4        | Zrn                   | 30.72 | 0.82   |       |       |      |       |       |      |      |       |      |      |    |      |       |     |     |      | 67.01 |      |       |       |       | 1.45 |      | 100   | 118          |

Table B13.1: Mineral chemical analyses from sample 25.

| Sample | Site | Position | Mineral          | SiO2   | TiO2  | Al2O3 | FeO   | MnO   | MgO   | CaO   | Na2O | K2O  | P2O5 | SO3 | F    | Cl | V2O5 | Cr2O3 | NiO | CuO | ZnO  | ZrO2  | Ag2O | La2O3 | Ce2O3 | Nd2O3 | HfO2 | WO3 | Total | Actual Total |
|--------|------|----------|------------------|--------|-------|-------|-------|-------|-------|-------|------|------|------|-----|------|----|------|-------|-----|-----|------|-------|------|-------|-------|-------|------|-----|-------|--------------|
| S25    | 14.1 | 5        | Zrn              | 31.38  | 1.13  |       |       |       |       |       |      |      |      |     |      |    |      |       |     |     |      | 67.49 |      |       |       |       |      |     | 100   | 120          |
| S25    | 15   | 1        | "Ilm" +          | 3.34   | 67.76 |       | 23.29 | 2.89  |       | 2.73  |      |      |      |     |      |    |      |       |     |     |      |       |      |       |       |       |      |     | 100   | 100          |
| S25    | 15   | 2        | Ep               | 40.71  |       | 30.22 | 3.51  |       |       | 22.56 |      |      |      |     |      |    |      |       |     |     |      |       |      |       |       |       |      |     | 97    | 103          |
| S25    | 15   | 3        | Chr              |        |       | 23.37 | 16.70 |       | 13.66 |       |      |      |      |     |      |    |      | 46.28 |     |     |      |       |      |       |       |       |      |     | 100   | 101          |
| S25    | 15   | 4        | Ep               | 40.25  |       | 25.08 | 9.66  | 0.32  |       | 21.69 |      |      |      |     |      |    |      |       |     |     |      |       |      |       |       |       |      |     | 97    | 102          |
| S25    | 15   | 5        | Ep               | 39.94  |       | 21.46 | 12.90 | 0.46  |       | 22.24 |      |      |      |     |      |    |      |       |     |     |      |       |      |       |       |       |      |     | 97    | 106          |
| S25    | 15   | 6        | Ep               | 40.23  |       | 24.35 | 9.61  |       |       | 22.81 |      |      |      |     |      |    |      |       |     |     |      |       |      |       |       |       |      |     | 97    | 108          |
| S25    | 15   | 7        | Chr              |        |       | 12.68 | 21.50 |       | 10.28 |       |      |      |      |     |      |    |      | 55.54 |     |     |      |       |      |       |       |       |      |     | 100   | 106          |
| S25    | 15   | 8        | Ilm              |        | 50.36 |       | 46.34 | 3.30  |       |       |      |      |      |     |      |    |      |       |     |     |      |       |      |       |       |       |      |     | 100   | 103          |
| S25    | 15   | 9        | Ilm +            | 3.25   | 59.93 | 2.80  | 18.69 | 13.19 | 2.14  |       |      |      |      |     |      |    |      |       |     |     |      |       |      |       |       |       |      |     | 100   | 112          |
| S25    | 15   | 10       | Ilm              |        | 53.63 |       | 22.43 | 23.94 |       |       |      |      |      |     |      |    |      |       |     |     |      |       |      |       |       |       |      |     | 100   | 105          |
| S25    | 15   | 11       | Ilm              |        | 51.74 |       | 47.40 | 0.86  |       |       |      |      |      |     |      |    |      |       |     |     |      |       |      |       |       |       |      |     | 100   | 98           |
| S25    | 15   | 12       | Chr +            | 11.14  | 0.64  | 6.19  | 22.42 | 0.95  | 12.56 |       | 0.42 |      |      |     |      |    |      | 45.01 |     |     | 0.66 |       |      |       |       |       |      |     | 100   | 93           |
| S25    | 15   | 13       | Grt              | 39.36  |       | 19.60 | 4.26  |       |       | 36.78 |      |      |      |     |      |    |      |       |     |     |      |       |      |       |       |       |      |     | 100   | 97           |
| S25    | 15   | 14       | Chr              |        |       | 17.74 | 18.62 |       | 11.87 |       |      |      |      |     |      |    |      | 51.78 |     |     |      |       |      |       |       |       |      |     | 100   | 101          |
| S25    | 15   | 15       | Ab               | 67.16  |       | 16.39 | 2.96  |       |       | 4.62  | 8.87 |      |      |     |      |    |      |       |     |     |      |       |      |       |       |       |      |     | 100   | 108          |
| S25    | 15   | 16       | Chr              |        |       | 9.02  | 25.69 |       | 7.75  |       |      |      |      |     |      |    |      | 57.53 |     |     |      |       |      |       |       |       |      |     | 100   | 102          |
| S25    | 15   | 17       | Chr              |        |       | 11.69 | 14.83 |       | 13.84 |       |      |      |      |     |      |    |      | 59.64 |     |     |      |       |      |       |       |       |      |     | 100   | 97           |
| S25    | 15   | 18       | Spl              |        |       | 48.96 | 12.84 |       | 19.01 |       |      |      |      |     |      |    |      | 19.19 |     |     |      |       |      |       |       |       |      |     | 100   | 99           |
| S25    | 15   | 19       | Ep               | 40.23  |       | 23.77 | 10.50 |       |       | 22.49 |      |      |      |     |      |    |      |       |     |     |      |       |      |       |       |       |      |     | 97    | 96           |
| S25    | 15   | 20       | Chr              | 2.08   |       | 20.50 | 18.60 |       | 13.06 |       |      |      |      |     |      |    | 0.42 | 45.35 |     |     |      |       |      |       |       |       |      |     | 100   | 102          |
| S25    | 15   | 21       | TiO <sub>2</sub> |        | 98.89 |       | 1.11  |       |       |       |      |      |      |     |      |    |      |       |     |     |      |       |      |       |       |       |      |     | 100   | 93           |
| S25    | 15   | 22       | Amph             | 47.68  |       | 10.60 | 12.69 | 0.33  | 12.67 | 10.43 | 2.03 | 0.23 |      |     |      |    |      | 0.35  |     |     |      |       |      |       |       |       |      |     | 97    | 102          |
| S25    | 15   | 23       | Ep               | 40.47  |       | 22.37 | 11.83 |       |       | 22.33 |      |      |      |     |      |    |      |       |     |     |      |       |      |       |       |       |      |     | 97    | 94           |
| S25    | 15.1 | 1        | Spl              |        |       | 30.47 | 16.61 |       | 14.44 |       |      |      |      |     |      |    |      | 38.47 |     |     |      |       |      |       |       |       |      |     | 100   | 106          |
| S25    | 15.1 | 2        | Chl              | 31.23  |       | 18.19 | 2.64  |       | 31.01 |       |      |      |      |     |      |    |      | 1.94  |     |     |      |       |      |       |       |       |      |     | 85    | 97           |
| S25    | 15.1 | 3        | Spl              |        |       | 37.15 | 15.20 |       | 15.54 |       |      |      |      |     |      |    |      | 32.11 |     |     |      |       |      |       |       |       |      |     | 100   | 106          |
| S25    | 15.1 | 4        | Chr + Spl        | 30.65  |       | 21.95 | 6.57  |       | 32.30 |       |      |      |      |     |      |    |      | 8.54  |     |     |      |       |      |       |       |       |      |     | 100   | 102          |
| S25    | 15.1 | 5        | Chr + Spl        | 10.73  |       | 25.43 | 15.05 |       | 17.84 |       |      |      |      |     |      |    |      | 30.94 |     |     |      |       |      |       |       |       |      |     | 100   | 94           |
| S25    | 16   | 1        | Spl              |        |       | 30.26 | 16.71 |       | 14.83 |       |      |      |      |     |      |    |      | 38.20 |     |     |      |       |      |       |       |       |      |     | 100   | 111          |
| S25    | 16   | 2        | "Ilm" +          | 9.24   | 78.20 |       | 6.24  |       |       | 6.32  |      |      |      |     |      |    |      |       |     |     |      |       |      |       |       |       |      |     | 100   | 108          |
| S25    | 16   | 3        | Opx              | 56.33  |       | 3.72  | 5.49  |       | 32.82 | 0.76  |      |      |      |     |      |    |      | 0.88  |     |     |      |       |      |       |       |       |      |     | 100   | 123          |
| S25    | 16   | 4        | Ttn +            | 24.40  | 33.61 | 5.47  | 15.87 | 0.85  | 5.05  | 14.75 |      |      |      |     |      |    |      |       |     |     |      |       |      |       |       |       |      |     | 100   | 114          |
| S25    | 16   | 5        | Mgohy            |        |       |       | 2.73  |       | 95.95 | 1.33  |      |      |      |     |      |    |      |       |     |     |      |       |      |       |       |       |      |     | 100   | 52           |
| S25    | 16   | 6        | Chr              |        |       | 11.49 | 17.05 |       | 12.38 |       |      |      |      |     |      |    |      | 59.08 |     |     |      |       |      |       |       |       |      |     | 100   | 121          |
| S25    | 16   | 7        | Tur              | 37.88  | 0.83  | 33.04 | 6.10  |       | 6.32  | 0.89  | 1.95 |      |      |     |      |    |      |       |     |     |      |       |      |       |       |       |      |     | 87    | 110          |
| S25    | 16   | 8        | Opx              | 56.58  |       | 4.58  | 6.39  |       | 27.50 | 3.87  |      |      |      |     |      |    |      | 1.08  |     |     |      |       |      |       |       |       |      |     | 100   | 110          |
| S25    | 16   | 9        | Ep               | 41.00  |       | 27.50 | 6.18  |       |       | 22.32 |      |      |      |     |      |    |      |       |     |     |      |       |      |       |       |       |      |     | 97    | 119          |
| S25    | 16   | 10       | Chr +            | 1.33   |       | 4.22  | 32.33 |       | 4.33  |       | 0.68 |      |      |     |      |    | 0.75 | 56.34 |     |     |      |       |      |       |       |       |      |     | 100   | 109          |
| S25    | 16   | 11       | "Chr"            |        | 0.41  | 13.72 | 39.46 | 0.94  | 5.53  |       |      |      |      |     |      |    |      | 39.94 |     |     |      |       |      |       |       |       |      |     | 100   | 109          |
| S25    | 16   | 12       | Qz               | 100.00 |       |       |       |       |       |       |      |      |      |     |      |    |      |       |     |     |      |       |      |       |       |       |      |     | 100   | 121          |
| S25    | 16   | 13       | Ilm              |        | 52.43 |       | 44.63 | 0.60  | 2.33  |       |      |      |      |     |      |    |      |       |     |     |      |       |      |       |       |       |      |     | 100   | 102          |
| S25    | 16   | 14       | Grt              | 39.65  |       | 21.04 | 31.65 | 2.03  | 4.04  | 1.58  |      |      |      |     |      |    |      |       |     |     |      |       |      |       |       |       |      |     | 100   | 112          |
| S25    | 16   | 15       | Chr              |        |       | 18.71 | 20.34 |       | 11.90 |       |      |      |      |     |      |    |      | 49.04 |     |     |      |       |      |       |       |       |      |     | 100   | 111          |
| S25    | 16   | 16       | Ep               | 41.11  |       | 28.24 | 1.28  |       | 2.13  | 22.79 |      |      |      |     | 1.44 |    |      |       |     |     |      |       |      |       |       |       |      |     | 97    | 99           |
| S25    | 16   | 17       | TiO <sub>2</sub> | 0.49   | 95.75 | 0.43  | 2.91  |       |       | 0.42  |      |      |      |     |      |    |      |       |     |     |      |       |      |       |       |       |      |     | 100   | 97           |
| S25    | 16   | 18       | Grt              | 40.75  |       | 22.29 | 1.06  |       |       | 35.89 |      |      |      |     |      |    |      |       |     |     |      |       |      |       |       |       |      |     | 100   | 113          |
| S25    | 16   | 19       | Chr              |        |       | 9.78  | 17.39 |       | 13.13 |       |      |      |      |     |      |    |      | 59.69 |     |     |      |       |      |       |       |       |      |     | 100   | 104          |
| S25    | 16   | 20       | Grt              | 40.13  |       | 20.88 | 27.06 | 0.57  | 2.27  | 9.08  |      |      |      |     |      |    |      |       |     |     |      |       |      |       |       |       |      |     | 100   | 110          |
| S25    | 16   | 21       | Chr              | 0.70   | 0.79  | 14.24 | 31.08 |       | 6.70  |       |      |      |      |     |      |    |      | 46.48 |     |     |      |       |      |       |       |       |      |     | 100   | 101          |
| S25    | 16   | 22       | Spl              |        |       | 47.01 | 14.84 |       | 17.63 |       |      |      |      |     |      |    |      | 19.92 |     |     | 0.59 |       |      |       |       |       |      |     | 100   | 105          |
| S25    | 16   | 23       | Chl + Chr        | 40.87  |       | 11.72 | 8.36  |       | 36.25 |       | 0.39 |      |      |     |      |    |      | 2.41  |     |     |      |       |      |       |       |       |      |     | 100   | 80           |
| S25    | 16   | 24       | Chl +            | 37.82  |       | 22.69 | 15.04 |       | 21.36 | 1.47  | 1.63 |      |      |     |      |    |      |       |     |     |      |       |      |       |       |       |      |     | 100   | 98           |
| S25    | 16   | 25       | Ilm              |        | 50.96 |       | 47.91 | 1.13  |       |       |      |      |      |     |      |    |      |       |     |     |      |       |      |       |       |       |      |     | 100   | 96           |
| S25    | 16   | 26       | Chr +            | 3.40   | 0.41  | 4.09  | 27.18 |       | 2.59  |       |      |      |      |     |      |    | 0.48 | 60.80 |     |     | 1.04 |       |      |       |       |       |      |     | 100   | 93           |
| S25    | 16   | 27       | Spl              |        | 66.03 |       | 32.10 | 1.87  |       |       |      |      |      |     |      |    |      |       |     |     |      |       |      |       |       |       |      |     | 100   | 99           |



Table B13.1: Mineral chemical analyses from sample 25.

| Sample | Site | Position | Mineral               | SiO2   | TiO2  | Al2O3 | FeO   | MnO  | MgO   | CaO   | Na2O  | K2O  | P2O5  | SO3   | F     | Cl | V2O5 | Cr2O3 | NiO  | CuO  | ZnO  | ZrO2  | Ag2O | La2O3 | Ce2O3 | Nd2O3 | HfO2 | WO3  | Total | Actual Total |
|--------|------|----------|-----------------------|--------|-------|-------|-------|------|-------|-------|-------|------|-------|-------|-------|----|------|-------|------|------|------|-------|------|-------|-------|-------|------|------|-------|--------------|
| S25    | 16.1 | 1        | Chl                   | 27.56  |       | 18.80 | 20.47 |      | 17.78 |       |       |      |       |       |       |    |      | 0.40  |      |      |      |       |      |       |       |       |      |      | 85    | 100          |
| S25    | 16.1 | 2        | Ab                    | 69.08  | 0.37  | 18.51 | 0.37  |      |       |       | 11.67 |      |       |       |       |    |      |       |      |      |      |       |      |       |       |       |      |      | 100   | 122          |
| S25    | 16.1 | 3        | Ilm + Qz + Gp         | 12.21  | 32.12 | 0.44  | 17.81 | 0.98 |       | 11.11 |       |      |       | 16.66 |       |    |      |       |      | 8.68 |      |       |      |       |       |       |      |      | 100   | 131          |
| S25    | 16.1 | 4        | Ap                    |        |       |       | 0.34  |      |       | 49.48 |       |      | 44.87 |       | 5.31  |    |      |       |      |      |      |       |      |       |       |       |      |      | 100   | 123          |
| S25    | 16.1 | 5        | Chl                   | 26.77  | 0.44  | 19.73 | 20.06 |      | 18.00 |       |       |      |       |       |       |    |      |       |      |      |      |       |      |       |       |       |      |      | 85    | 96           |
| S25    | 16.2 | 1        | Zrn                   | 31.45  | 1.05  |       |       |      |       |       |       |      |       |       |       |    |      |       |      |      |      | 67.50 |      |       |       |       |      |      | 100   | 117          |
| S25    | 16.2 | 2        | Ab                    | 69.29  | 0.43  | 18.57 |       |      |       |       | 11.71 |      |       |       |       |    |      |       |      |      |      |       |      |       |       |       |      |      | 100   | 121          |
| S25    | 16.2 | 3        | TiO <sub>2</sub>      |        | 99.50 |       | 0.50  |      |       |       |       |      |       |       |       |    |      |       |      |      |      |       |      |       |       |       |      |      | 100   | 109          |
| S25    | 16.2 | 4        | Chl                   | 25.87  | 0.67  | 20.14 | 26.03 | 0.42 | 11.87 |       |       |      |       |       |       |    |      |       |      |      |      |       |      |       |       |       |      |      | 85    | 101          |
| S25    | 16.2 | 5        | Qz                    | 100.00 |       |       |       |      |       |       |       |      |       |       |       |    |      |       |      |      |      |       |      |       |       |       |      |      | 100   | 123          |
| S25    | 16.2 | 6        | TiO <sub>2</sub>      |        | 99.16 |       | 0.49  |      |       | 0.35  |       |      |       |       |       |    |      |       |      |      |      |       |      |       |       |       |      |      | 100   | 109          |
| S25    | 16.2 | 7        | Cal                   |        | 0.43  |       | 0.43  | 1.12 |       | 33.44 |       |      |       |       | 20.59 |    |      |       |      |      |      |       |      |       |       |       |      |      | 56    | 90           |
| S25    | 17   | 1        | Grt                   | 40.55  | 1.66  | 17.62 | 4.61  |      |       | 35.56 |       |      |       |       |       |    |      |       |      |      |      |       |      |       |       |       |      |      | 100   | 108          |
| S25    | 17   | 2        | Grt                   | 39.93  |       | 20.95 | 27.01 | 1.16 | 1.66  | 9.28  |       |      |       |       |       |    |      |       |      |      |      |       |      |       |       |       |      |      | 100   | 112          |
| S25    | 17   | 3        | Ttn                   | 33.11  | 38.94 |       | 0.52  |      |       | 27.42 |       |      |       |       |       |    |      |       |      |      |      |       |      |       |       |       |      |      | 100   | 111          |
| S25    | 17   | 4        | Ilm +                 | 4.43   | 51.75 | 0.69  | 38.06 | 1.49 |       | 3.59  |       |      |       |       |       |    |      |       |      |      |      |       |      |       |       |       |      |      | 100   | 105          |
| S25    | 17   | 5        | St                    | 29.68  | 0.65  | 52.90 | 13.66 |      | 2.33  |       |       |      |       |       |       |    |      |       |      |      | 0.78 |       |      |       |       |       |      |      | 100   | 111          |
| S25    | 17   | 6        | Ep                    | 40.67  |       | 28.63 | 4.87  |      |       | 22.83 |       |      |       |       |       |    |      |       |      |      |      |       |      |       |       |       |      |      | 97    | 114          |
| S25    | 17   | 7        | Ilm                   |        | 54.18 |       | 44.66 | 1.16 |       |       |       |      |       |       |       |    |      |       |      |      |      |       |      |       |       |       |      |      | 100   | 102          |
| S25    | 17   | 8        | Chr + Qz              | 26.19  |       | 16.87 | 11.84 |      | 27.71 |       |       |      |       |       |       |    |      | 17.08 |      |      | 0.32 |       |      |       |       |       |      |      | 100   | 99           |
| S25    | 17   | 9        | Qz + TiO <sub>2</sub> | 66.19  | 33.81 |       |       |      |       |       |       |      |       |       |       |    |      |       |      |      |      |       |      |       |       |       |      |      | 100   | 127          |
| S25    | 17   | 10       | Mix                   | 18.38  |       | 6.31  | 63.07 |      | 2.85  | 2.23  | 1.44  | 0.83 | 0.99  |       |       |    |      |       |      |      |      |       |      |       |       |       |      | 3.90 | 100   | 93           |
| S25    | 17   | 11       | Grt                   | 40.85  | 0.67  | 17.06 | 7.36  |      |       | 34.05 |       |      |       |       |       |    |      |       |      |      |      |       |      |       |       |       |      |      | 100   | 122          |
| S25    | 17   | 12       | "Ilm" +               | 4.57   | 64.27 | 0.92  | 27.95 | 2.29 |       |       |       |      |       |       |       |    |      |       |      |      |      |       |      |       |       |       |      |      | 100   | 107          |
| S25    | 17   | 13       | Chr                   |        |       | 9.97  | 21.70 |      | 9.21  |       |       |      |       |       |       |    | 0.51 | 58.61 |      |      |      |       |      |       |       |       |      |      | 100   | 112          |
| S25    | 17   | 14       | Mix                   | 25.67  | 34.42 | 5.24  | 15.07 | 0.80 | 4.60  | 14.20 |       |      |       |       |       |    |      |       |      |      |      |       |      |       |       |       |      |      | 100   | 116          |
| S25    | 17   | 15       | Ilm                   |        | 48.76 |       | 48.29 | 2.95 |       |       |       |      |       |       |       |    |      |       |      |      |      |       |      |       |       |       |      |      | 100   | 106          |
| S25    | 17   | 16       | Opx                   | 56.79  |       | 2.86  | 5.60  |      | 33.62 | 0.45  |       |      |       |       |       |    |      | 0.67  |      |      |      |       |      |       |       |       |      |      | 100   | 119          |
| S25    | 17   | 17       | Mix                   | 53.59  |       | 5.19  | 22.79 |      | 11.96 |       | 1.56  | 4.91 |       |       |       |    |      |       |      |      |      |       |      |       |       |       |      |      | 100   | 115          |
| S25    | 17   | 18       | Chr                   |        |       | 4.80  | 21.16 |      | 7.24  |       |       |      |       |       |       |    |      | 66.80 |      |      |      |       |      |       |       |       |      |      | 100   | 102          |
| S25    | 17   | 19       | Opx                   | 55.78  |       | 4.03  | 5.61  |      | 32.80 | 0.86  |       |      |       |       |       |    |      | 0.93  |      |      |      |       |      |       |       |       |      |      | 100   | 110          |
| S25    | 17   | 20       | Cal                   |        |       |       | 0.20  | 0.27 | 0.41  | 30.52 |       |      |       |       | 24.60 |    |      |       |      |      |      |       |      |       |       |       |      |      | 56    | 89           |
| S25    | 17   | 21       | Zrn                   | 30.48  |       |       | 0.40  |      |       |       |       |      |       |       |       |    |      |       |      |      |      | 69.12 |      |       |       |       |      |      | 100   | 104          |
| S25    | 17   | 22       | "Chr"                 |        |       |       | 73.42 | 1.42 | 2.76  |       |       |      |       |       |       |    |      | 21.48 | 0.92 |      |      |       |      |       |       |       |      |      | 100   | 87           |
| S25    | 17   | 23       | Opx                   | 55.71  |       | 4.20  | 5.24  |      | 32.08 | 1.91  |       |      |       |       |       |    |      | 0.86  |      |      |      |       |      |       |       |       |      |      | 100   | 106          |
| S25    | 17   | 24       | Mix                   | 21.67  | 50.45 | 1.43  | 6.88  | 0.94 |       | 18.44 |       |      |       |       |       |    |      |       |      |      | 0.20 |       |      |       |       |       |      |      | 100   | 95           |
| S25    | 17   | 25       | Ep                    | 39.56  |       | 19.87 | 13.45 | 4.20 |       | 19.93 |       |      |       |       |       |    |      |       |      |      |      |       |      |       |       |       |      |      | 97    | 104          |
| S25    | 17   | 26       | Chr                   |        |       | 24.63 | 17.99 |      | 13.24 |       |       |      |       |       |       |    |      | 43.60 |      |      | 0.54 |       |      |       |       |       |      |      | 100   | 105          |
| S25    | 17   | 27       | Ep                    | 39.90  |       | 20.71 | 14.06 |      |       | 22.34 |       |      |       |       |       |    |      |       |      |      |      |       |      |       |       |       |      |      | 97    | 105          |
| S25    | 17   | 28       | Ilm                   |        | 51.01 |       | 45.56 | 3.43 |       |       |       |      |       |       |       |    |      |       |      |      |      |       |      |       |       |       |      |      | 100   | 102          |
| S25    | 17   | 29       | Feohy +               | 6.13   |       | 4.82  | 75.35 |      | 0.93  | 1.11  | 1.48  |      | 1.15  |       |       |    |      |       |      |      |      |       |      |       |       |       |      | 9.03 | 100   | 76           |
| S25    | 17   | 30       | Ilm                   |        | 54.07 |       | 42.98 | 2.95 |       |       |       |      |       |       |       |    |      |       |      |      |      |       |      |       |       |       |      |      | 100   | 114          |
| S25    | 17   | 31       | Ep                    | 40.00  |       | 24.06 | 10.39 |      |       | 22.55 |       |      |       |       |       |    |      |       |      |      |      |       |      |       |       |       |      |      | 97    | 115          |
| S25    | 17   | 32       | Grt                   | 39.92  |       | 20.73 | 31.44 | 1.38 | 2.78  | 3.76  |       |      |       |       |       |    |      |       |      |      |      |       |      |       |       |       |      |      | 100   | 121          |
| S25    | 17   | 33       | Tur                   | 38.51  | 0.90  | 30.21 | 8.19  |      | 6.27  | 0.49  | 2.44  |      |       |       |       |    |      |       |      |      |      |       |      |       |       |       |      |      | 87    | 107          |
| S25    | 17   | 34       | Chr                   |        |       | 22.51 | 17.44 |      | 13.11 |       |       |      |       |       |       |    | 0.45 | 46.49 |      |      |      |       |      |       |       |       |      |      | 100   | 119          |
| S25    | 17.1 | 1        | "Chr"                 | 5.67   |       | 2.18  | 41.13 | 2.56 | 6.69  |       |       |      |       |       |       |    |      | 41.27 |      |      | 0.50 |       |      |       |       |       |      |      | 100   | 99           |
| S25    | 17.1 | 2        | Chl                   | 32.88  |       | 13.62 | 2.55  |      | 31.46 |       |       |      |       |       | 2.58  |    |      | 1.91  |      |      |      |       |      |       |       |       |      |      | 85    | 108          |
| S25    | 17.1 | 3        | Spl                   |        |       | 31.90 | 16.15 |      | 16.49 |       |       |      |       |       |       |    |      | 35.45 |      |      |      |       |      |       |       |       |      |      | 100   | 112          |
| S25    | 17.1 | 4        | "Chr"                 | 5.59   |       | 3.62  | 43.12 | 4.56 | 6.90  |       |       |      |       |       |       |    |      | 35.29 |      |      | 0.93 |       |      |       |       |       |      |      | 100   | 104          |
| S25    | 17.1 | 5        | "Chr"                 | 10.12  |       | 4.58  | 42.24 | 1.45 | 9.97  |       |       |      |       |       |       |    |      | 29.63 |      |      | 2.00 |       |      |       |       |       |      |      | 100   | 101          |
| S25    | 17.1 | 6        | Chr                   |        |       | 14.03 | 18.31 |      | 11.14 |       |       |      |       |       |       |    |      | 55.86 |      |      | 0.66 |       |      |       |       |       |      |      | 100   | 114          |
| S25    | 17.1 | 7        | St                    | 31.00  | 0.50  | 54.60 | 9.13  | 0.28 | 0.85  |       |       |      |       |       |       |    |      |       |      |      | 3.63 |       |      |       |       |       |      |      | 100   | 115          |
| S25    | 17.1 | 8        | Grt                   | 39.52  |       | 20.96 | 31.60 | 2.07 | 3.75  | 2.09  |       |      |       |       |       |    |      |       |      |      |      |       |      |       |       |       |      |      | 100   | 116          |
| S25    | 17.1 | 9        | Spl                   |        | 0.47  | 37.23 | 19.74 |      | 15.39 |       |       |      |       |       |       |    |      | 27.17 |      |      |      |       |      |       |       |       |      |      | 100   | 110          |
| S25    | 18   | 1        | Opx                   | 56.35  |       | 3.43  | 5.67  |      | 32.72 | 1.09  |       |      |       |       |       |    |      | 0.74  |      |      |      |       |      |       |       |       |      |      | 100   | 110          |

Table B13.1: Mineral chemical analyses from sample 25.

| Sample | Site | Position | Mineral                | SiO2   | TiO2  | Al2O3 | FeO   | MnO  | MgO   | CaO   | Na2O  | K2O  | P2O5  | SO3 | F    | Cl | V2O5 | Cr2O3 | NiO | CuO | ZnO  | ZrO2  | Ag2O | La2O3 | Ce2O3 | Nd2O3 | HfO2 | WO3  | Total | Actual Total |
|--------|------|----------|------------------------|--------|-------|-------|-------|------|-------|-------|-------|------|-------|-----|------|----|------|-------|-----|-----|------|-------|------|-------|-------|-------|------|------|-------|--------------|
| S25    | 18   | 2        | St                     | 28.32  |       | 44.05 | 21.05 | 0.42 | 6.16  |       |       |      |       |     |      |    |      |       |     |     |      |       |      |       |       |       |      |      | 100   | 98           |
| S25    | 18   | 3        | Chr                    |        |       | 17.76 | 19.51 |      | 11.59 |       |       |      |       |     |      |    |      | 50.86 |     |     | 0.28 |       |      |       |       |       |      |      | 100   | 105          |
| S25    | 18   | 4        | Grt                    | 39.66  |       | 20.99 | 30.98 | 1.06 | 3.74  | 3.57  |       |      |       |     |      |    |      |       |     |     |      |       |      |       |       |       |      |      | 100   | 109          |
| S25    | 18   | 5        | Olig + Chl             | 63.58  |       | 16.46 | 9.02  |      | 2.90  | 2.44  | 5.60  |      |       |     |      |    |      |       |     |     |      |       |      |       |       |       |      |      | 100   | 113          |
| S25    | 18   | 6        | Ilm +                  | 3.95   | 51.48 |       | 38.95 | 2.71 |       | 2.59  |       |      |       |     |      |    |      |       |     |     | 0.32 |       |      |       |       |       |      |      | 100   | 108          |
| S25    | 18   | 7        | Feohy +                | 6.04   |       | 1.04  | 91.06 |      |       | 0.41  |       |      | 1.04  |     |      |    |      | 0.42  |     |     |      |       |      |       |       |       |      |      | 100   | 84           |
| S25    | 18   | 8        | Chr                    |        |       | 9.64  | 26.22 |      | 7.71  |       |       |      |       |     |      |    | 0.50 | 55.46 |     |     | 0.48 |       |      |       |       |       |      |      | 100   | 118          |
| S25    | 18   | 9        | Mix                    | 19.68  | 64.64 | 7.41  | 3.15  |      | 1.04  |       |       | 3.99 |       |     |      |    |      |       |     |     | 0.08 |       |      |       |       |       |      |      | 100   | 107          |
| S25    | 18   | 10       | Grt                    | 39.87  |       | 20.99 | 29.97 | 0.83 | 3.36  | 4.71  |       |      |       |     |      |    |      |       |     |     | 0.26 |       |      |       |       |       |      |      | 100   | 117          |
| S25    | 18   | 11       | Ep                     | 40.59  |       | 30.87 | 1.51  |      |       | 22.73 |       |      |       |     | 1.30 |    |      |       |     |     |      |       |      |       |       |       |      |      | 97    | 114          |
| S25    | 18   | 12       | Ep                     | 39.90  |       | 21.08 | 13.65 |      |       | 22.38 |       |      |       |     |      |    |      |       |     |     |      |       |      |       |       |       |      |      | 97    | 109          |
| S25    | 18   | 13       | Chr                    |        |       | 19.25 | 18.82 |      | 12.25 |       |       |      |       |     |      |    |      | 49.68 |     |     |      |       |      |       |       |       |      |      | 100   | 106          |
| S25    | 18   | 14       | Fe-Per                 |        |       |       | 10.82 |      | 89.18 |       |       |      |       |     |      |    |      |       |     |     |      |       |      |       |       |       |      |      | 100   | 50           |
| S25    | 18   | 15       | Chr                    |        |       | 7.69  | 30.66 |      | 4.24  |       |       |      |       |     |      |    |      |       |     |     | 0.70 |       |      |       |       |       |      |      | 100   | 97           |
| S25    | 18   | 16       | TiO <sub>2</sub> +     | 12.48  | 82.32 | 2.41  | 0.52  |      |       |       | 0.52  | 0.23 |       |     | 1.51 |    |      |       |     |     |      |       |      |       |       |       |      |      | 100   | 103          |
| S25    | 18   | 17       | Crd                    | 44.62  | 0.90  | 36.00 | 5.06  |      | 9.85  | 0.76  | 2.81  |      |       |     |      |    |      |       |     |     |      |       |      |       |       |       |      |      | 100   | 91           |
| S25    | 18   | 18       | TiO <sub>2</sub> + Qz  | 44.19  | 54.72 |       | 1.09  |      |       |       |       |      |       |     |      |    |      |       |     |     |      |       |      |       |       |       |      |      | 100   | 88           |
| S25    | 18   | 19       | Zrn                    | 31.21  |       |       |       |      |       |       |       |      |       |     |      |    |      |       |     |     |      | 68.79 |      |       |       |       |      |      | 100   | 102          |
| S25    | 18   | 20       | Qz + TiO <sub>2</sub>  | 87.55  | 12.45 |       |       |      |       |       |       |      |       |     |      |    |      |       |     |     |      |       |      |       |       |       |      |      | 100   | 100          |
| S25    | 18   | 21       | Spl                    |        |       | 39.95 | 14.89 |      | 17.07 |       |       |      |       |     |      |    |      | 28.09 |     |     |      |       |      |       |       |       |      |      | 100   | 106          |
| S25    | 18   | 22       | Cpx                    | 53.42  | 0.82  | 2.42  | 8.03  | 0.43 | 15.40 | 19.05 | 0.43  |      |       |     |      |    |      |       |     |     |      |       |      |       |       |       |      |      | 100   | 107          |
| S25    | 18   | 23       | Ilm                    |        | 56.84 |       | 40.31 | 2.84 |       |       |       |      |       |     |      |    |      |       |     |     |      |       |      |       |       |       |      |      | 100   | 96           |
| S25    | 18   | 24       | Ilm                    |        | 50.34 |       | 44.29 | 5.25 |       |       |       |      |       |     |      |    |      |       |     |     | 0.12 |       |      |       |       |       |      |      | 100   | 98           |
| S25    | 18   | 25       | Chr                    |        |       | 23.26 | 16.61 |      | 13.47 |       |       |      |       |     |      |    |      | 46.67 |     |     |      |       |      |       |       |       |      |      | 100   | 110          |
| S25    | 18.1 | 1        | TiO <sub>2</sub>       |        | 99.28 |       | 0.72  |      |       |       |       |      |       |     |      |    |      |       |     |     |      |       |      |       |       |       |      |      | 100   | 112          |
| S25    | 18.1 | 2        | Ap                     | 0.46   |       |       | 0.66  |      |       | 47.16 |       |      | 43.85 |     | 6.38 |    |      |       |     |     |      |       |      |       |       |       |      | 1.48 | 100   | 130          |
| S25    | 18.1 | 3        | Qz                     | 100.00 |       |       |       |      |       |       |       |      |       |     |      |    |      |       |     |     |      |       |      |       |       |       |      |      | 100   | 126          |
| S25    | 18.1 | 4        | Chl                    | 25.87  | 0.62  | 21.20 | 24.62 |      | 12.69 |       |       |      |       |     |      |    |      |       |     |     |      |       |      |       |       |       |      |      | 85    | 102          |
| S25    | 18.1 | 5        | TiO <sub>2</sub>       |        | 98.71 |       | 1.29  |      |       |       |       |      |       |     |      |    |      |       |     |     |      |       |      |       |       |       |      |      | 100   | 111          |
| S25    | 19   | 1        | Opx                    | 56.86  |       | 2.99  | 5.25  |      | 33.81 | 0.39  |       |      |       |     |      |    |      | 0.70  |     |     |      |       |      |       |       |       |      |      | 100   | 108          |
| S25    | 19   | 2        | Chr                    |        |       | 9.10  | 21.59 |      | 7.12  |       |       |      |       |     |      |    |      | 62.20 |     |     |      |       |      |       |       |       |      |      | 100   | 99           |
| S25    | 19   | 3        | Opx                    | 56.08  |       | 3.85  | 5.74  |      | 33.28 | 0.43  |       |      |       |     |      |    |      | 0.63  |     |     |      |       |      |       |       |       |      |      | 100   | 107          |
| S25    | 19   | 4        | Spl                    |        |       | 38.22 | 18.92 |      | 15.08 |       |       |      |       |     |      |    |      | 27.78 |     |     |      |       |      |       |       |       |      |      | 100   | 100          |
| S25    | 19   | 5        | Ilm                    |        | 53.61 |       | 42.06 | 4.32 |       |       |       |      |       |     |      |    |      |       |     |     |      |       |      |       |       |       |      |      | 100   | 101          |
| S25    | 19   | 6        | TiO <sub>2</sub> +     | 2.70   | 96.44 |       | 0.85  |      |       |       |       |      |       |     |      |    |      |       |     |     |      |       |      |       |       |       |      |      | 100   | 100          |
| S25    | 19   | 7        | Chr                    |        |       | 11.58 | 17.13 |      | 12.39 |       |       |      |       |     |      |    |      | 58.90 |     |     |      |       |      |       |       |       |      |      | 100   | 103          |
| S25    | 19   | 8        | Chr                    |        |       | 8.40  | 18.09 |      | 9.22  |       |       |      |       |     |      |    |      | 62.41 |     |     | 1.89 |       |      |       |       |       |      |      | 100   | 98           |
| S25    | 19   | 9        | Opx                    | 56.50  |       | 3.38  | 5.00  |      | 30.93 | 3.57  |       |      |       |     |      |    |      | 0.62  |     |     |      |       |      |       |       |       |      |      | 100   | 108          |
| S25    | 19   | 10       | Ilm                    | 0.80   | 59.80 |       | 31.97 | 6.71 |       | 0.71  |       |      |       |     |      |    |      |       |     |     |      |       |      |       |       |       |      |      | 100   | 98           |
| S25    | 19   | 11       | Chr +                  | 6.27   |       | 7.35  | 28.62 | 1.14 | 9.34  |       |       |      |       |     |      |    | 0.60 | 46.00 |     |     | 0.66 |       |      |       |       |       |      |      | 100   | 109          |
| S25    | 19   | 12       | TiO <sub>2</sub> + Qz  | 16.05  | 83.35 |       | 0.60  |      |       |       |       |      |       |     |      |    |      |       |     |     |      |       |      |       |       |       |      |      | 100   | 110          |
| S25    | 19   | 13       | TiO2 +                 | 7.70   | 67.75 | 2.30  | 9.38  | 0.67 |       | 6.38  | 0.98  |      | 1.09  |     |      |    |      | 0.39  |     |     |      |       |      |       |       |       |      | 3.35 | 100   | 99           |
| S25    | 19   | 14       | Mix                    | 36.15  |       | 18.54 | 12.97 | 1.76 |       | 12.02 |       |      |       |     |      |    |      |       |     |     |      |       |      | 5.32  | 9.98  | 3.27  |      |      | 100   | 109          |
| S25    | 19   | 15       | "Chr"                  | 4.94   | 0.68  | 0.93  | 49.47 | 6.24 | 6.80  |       |       |      |       |     |      |    |      | 30.65 |     |     | 0.29 |       |      |       |       |       |      |      | 100   | 103          |
| S25    | 19   | 16       | Ep                     | 40.23  |       | 27.06 | 6.97  |      |       | 22.74 |       |      |       |     |      |    |      |       |     |     |      |       |      |       |       |       |      |      | 97    | 109          |
| S25    | 19   | 17       | Chr                    |        |       | 21.29 | 17.71 |      | 12.25 |       |       |      |       |     |      |    |      | 48.75 |     |     |      |       |      |       |       |       |      |      | 100   | 106          |
| S25    | 19   | 18       | "Ilm" + Chl            | 10.00  | 70.17 | 6.30  | 8.09  |      | 4.97  |       | 0.47  |      |       |     |      |    |      |       |     |     |      |       |      |       |       |       |      |      | 100   | 110          |
| S25    | 19   | 19       | Ilm +                  | 2.46   | 50.80 |       | 41.85 | 2.94 |       | 1.65  |       |      |       |     |      |    |      |       |     |     | 0.31 |       |      |       |       |       |      |      | 100   | 111          |
| S25    | 19   | 20       | TiO <sub>2</sub> + Chl | 6.85   | 82.65 | 2.84  | 3.44  |      | 3.66  |       | 0.55  |      |       |     |      |    |      |       |     |     |      |       |      |       |       |       |      |      | 100   | 88           |
| S25    | 19   | 21       | Chr                    |        |       | 8.17  | 22.37 |      | 7.67  |       |       |      |       |     |      |    |      | 61.49 |     |     | 0.30 |       |      |       |       |       |      |      | 100   | 117          |
| S25    | 19   | 22       | Grt                    | 41.12  |       | 22.20 | 0.81  |      |       | 35.86 |       |      |       |     |      |    |      |       |     |     |      |       |      |       |       |       |      |      | 100   | 123          |
| S25    | 19   | 23       | Chr                    |        |       | 13.52 | 17.02 |      | 9.86  |       |       |      |       |     |      |    | 0.44 | 59.17 |     |     |      |       |      |       |       |       |      |      | 100   | 118          |
| S25    | 19   | 24       | Ab + TiO <sub>2</sub>  | 60.78  | 7.22  | 17.47 | 3.14  |      | 0.55  |       | 10.84 |      |       |     |      |    |      |       |     |     |      |       |      |       |       |       |      |      | 100   | 133          |
| S25    | 19.1 | 1        | "Chr"                  | 1.05   |       |       | 55.94 | 7.02 | 1.96  |       |       |      |       |     |      |    |      | 33.26 |     |     | 0.77 |       |      |       |       |       |      |      | 100   | 105          |
| S25    | 19.1 | 2        | Chr                    |        | 0.35  | 27.78 | 27.45 |      | 9.94  |       |       |      |       |     |      |    |      |       |     |     |      |       |      |       |       |       |      |      | 100   | 114          |
| S25    | 19.1 | 3        | Chl                    | 33.04  |       | 15.92 | 2.72  |      | 32.68 |       |       |      |       |     |      |    |      | 0.64  |     |     |      |       |      |       |       |       |      |      | 85    | 103          |

Table B13.1: Mineral chemical analyses from sample 25.

| Sample | Site | Position                                    | Mineral    | SiO2   | TiO2  | Al2O3 | FeO   | MnO  | MgO   | CaO   | Na2O | K2O  | P2O5  | SO3  | F    | Cl | V2O5 | Cr2O3 | NiO  | CuO | ZnO  | ZrO2  | Ag2O | La2O3 | Ce2O3 | Nd2O3 | HfO2 | WO3 | Total | Actual Total |
|--------|------|---------------------------------------------|------------|--------|-------|-------|-------|------|-------|-------|------|------|-------|------|------|----|------|-------|------|-----|------|-------|------|-------|-------|-------|------|-----|-------|--------------|
| S25    | 19.1 | 4                                           | Srp        | 40.71  |       | 0.90  | 7.40  |      | 35.97 | 0.23  |      |      |       | 1.30 |      |    |      | 0.50  |      |     |      |       |      |       |       |       |      |     | 87    | 105          |
| S25    | 20   | 1                                           | Ep         | 40.20  |       | 23.42 | 11.09 |      |       | 22.30 |      |      |       |      |      |    |      |       |      |     |      |       |      |       |       |       |      |     | 97    | 109          |
| S25    | 20   | 2                                           | Chr        |        |       | 10.12 | 22.69 |      | 8.46  |       |      |      |       |      |      |    |      | 58.22 |      |     | 0.52 |       |      |       |       |       |      |     | 100   | 110          |
| S25    | 20   | 3                                           | TiO2 +     | 3.75   | 90.16 | 2.10  | 1.51  |      |       |       |      | 0.81 |       |      | 1.44 |    |      |       |      |     | 0.22 |       |      |       |       |       |      |     | 100   | 119          |
| S25    | 20   | 4                                           | Grt        | 39.87  |       | 21.36 | 30.41 | 1.35 | 5.25  | 1.76  |      |      |       |      |      |    |      |       |      |     |      |       |      |       |       |       |      |     | 100   | 122          |
| S25    | 20   | 5                                           | Ilm        |        | 52.10 |       | 45.16 | 0.62 | 2.11  |       |      |      |       |      |      |    |      |       |      |     |      |       |      |       |       |       |      |     | 100   | 119          |
| S25    | 20   | 6                                           | Spl        |        |       | 51.07 | 13.21 |      | 18.98 |       |      |      |       |      |      |    | 0.36 | 16.37 |      |     |      |       |      |       |       |       |      |     | 100   | 124          |
| S25    | 20   | 7                                           | TiO2 + Chl | 9.69   | 70.45 | 7.66  | 2.32  |      | 9.50  |       |      |      |       |      |      |    |      |       |      |     | 0.37 |       |      |       |       |       |      |     | 100   | 113          |
| S25    | 20   | 8                                           | Mix        | 21.76  | 48.43 | 0.71  | 10.92 | 0.95 |       | 17.24 |      |      |       |      |      |    |      |       |      |     |      |       |      |       |       |       |      |     | 100   | 118          |
| S25    | 20   | 9                                           | Spl        |        |       | 54.02 | 12.00 |      | 19.61 |       |      |      |       |      |      |    |      | 14.37 |      |     |      |       |      |       |       |       |      |     | 100   | 117          |
| S25    | 20   | 10                                          | Chr        |        |       | 12.88 | 20.38 |      | 9.56  |       |      |      |       |      |      |    |      | 57.17 |      |     |      |       |      |       |       |       |      |     | 100   | 113          |
| S25    | 20   | 11                                          | Mix        | 44.37  |       | 10.41 | 8.94  |      | 30.93 | 4.94  | 0.42 |      |       |      |      |    |      |       |      |     |      |       |      |       |       |       |      |     | 100   | 90           |
| S25    | 20   | 12                                          | Spl        |        |       | 50.12 | 12.85 |      | 18.78 |       |      |      |       |      |      |    |      | 18.25 |      |     |      |       |      |       |       |       |      |     | 100   | 104          |
| S25    | 20   | 13                                          | Grt        | 39.63  |       | 21.04 | 31.53 | 0.98 | 3.66  | 3.16  |      |      |       |      |      |    |      |       |      |     |      |       |      |       |       |       |      |     | 100   | 110          |
| S25    | 20   | 14                                          | Spl        |        |       | 31.58 | 22.28 |      | 12.85 |       |      |      |       |      |      |    |      | 32.82 |      |     | 0.46 |       |      |       |       |       |      |     | 100   | 100          |
| S25    | 20   | 15                                          | Zrn        | 31.25  |       |       |       |      |       |       |      |      |       |      |      |    |      |       |      |     |      | 68.75 |      |       |       |       |      |     | 100   | 108          |
| S25    | 20   | 16                                          | Mgohy      |        |       |       |       |      | 97.97 |       |      |      |       |      | 2.03 |    |      |       |      |     |      |       |      |       |       |       |      |     | 100   | 47           |
| S25    | 20   | 17                                          | Ep         | 41.21  |       | 26.79 | 1.60  |      | 3.44  | 22.31 | 0.33 |      |       |      | 1.31 |    |      |       |      |     |      |       |      |       |       |       |      |     | 97    | 103          |
| S25    | 20   | 18                                          | Spl        |        |       | 35.92 | 15.90 |      | 15.81 |       |      |      |       |      |      |    |      | 32.37 |      |     |      |       |      |       |       |       |      |     | 100   | 100          |
| S25    | 20   | 19                                          | Zrn        | 31.08  |       |       |       |      |       |       |      |      |       |      |      |    |      |       |      |     |      | 68.92 |      |       |       |       |      |     | 100   | 111          |
| S25    | 20   | 20                                          | Ep         | 40.48  |       | 27.00 | 7.20  |      |       | 22.33 |      |      |       |      |      |    |      |       |      |     |      |       |      |       |       |       |      |     | 97    | 98           |
| S25    | 20   | 21                                          | "Ilm" +    | 1.67   | 76.37 |       | 17.98 | 2.32 |       | 1.66  |      |      |       |      |      |    |      |       |      |     |      |       |      |       |       |       |      |     | 100   | 93           |
| S25    | 20   | 22                                          | Tur        | 38.34  | 1.02  | 31.60 | 6.48  |      | 6.74  | 0.44  | 2.37 |      |       |      |      |    |      |       |      |     |      |       |      |       |       |       |      |     | 87    | 90           |
| S25    | 20   | 23                                          | Spl        |        |       | 42.75 | 14.66 |      | 17.57 |       |      |      |       |      |      |    |      | 25.02 |      |     |      |       |      |       |       |       |      |     | 100   | 102          |
| S25    | 20   | 24                                          | Ep         | 40.09  |       | 24.98 | 9.35  |      |       | 22.58 |      |      |       |      |      |    |      |       |      |     |      |       |      |       |       |       |      |     | 97    | 102          |
| S25    | 20   | 25                                          | Chr        |        |       | 17.47 | 23.31 |      | 10.98 |       |      |      |       |      |      |    |      | 48.23 |      |     |      |       |      |       |       |       |      |     | 100   | 104          |
| S25    | 20   | 26                                          | Chr        |        |       | 15.33 | 18.38 |      | 11.39 |       |      |      |       |      |      |    |      | 54.89 |      |     |      |       |      |       |       |       |      |     | 100   | 109          |
| S25    | 20   | 27                                          | Ttn        | 33.91  | 35.02 | 1.82  | 0.58  |      |       | 26.78 |      |      |       |      | 1.88 |    |      |       |      |     |      |       |      |       |       |       |      |     | 100   | 116          |
| S25    | 20   | 28                                          | Qz         | 100.00 |       |       |       |      |       |       |      |      |       |      |      |    |      |       |      |     |      |       |      |       |       |       |      |     | 100   | 122          |
| S25    | 20   | 29                                          | Grt        | 39.35  |       | 21.05 | 32.13 | 0.44 | 1.64  | 5.39  |      |      |       |      |      |    |      |       |      |     |      |       |      |       |       |       |      |     | 100   | 113          |
| S25    | 20   | 30                                          | Ilm        |        | 58.51 |       | 40.61 | 0.88 |       |       |      |      |       |      |      |    |      |       |      |     |      |       |      |       |       |       |      |     | 100   | 99           |
| S25    | 20   | 31                                          | St         | 30.35  | 0.38  | 53.61 | 13.76 |      | 1.91  |       |      |      |       |      |      |    |      |       |      |     |      |       |      |       |       |       |      |     | 100   | 112          |
| S25    | 20   | 32                                          | Feohy +    | 2.93   |       | 0.70  | 96.37 |      |       |       |      |      |       |      |      |    |      |       |      |     |      |       |      |       |       |       |      |     | 100   | 91           |
| S25    | 20.1 | 1                                           | Ep         | 40.33  |       | 22.11 | 12.33 |      |       | 22.23 |      |      |       |      |      |    |      |       |      |     |      |       |      |       |       |       |      |     | 97    | 112          |
| S25    | 20.1 | 2                                           | Aln +      | 37.97  |       | 20.44 | 12.32 | 1.25 |       | 15.75 |      |      |       |      |      |    |      |       |      |     |      |       |      | 3.26  | 6.63  | 2.39  |      |     | 100   | 109          |
| S25    | 20.1 | 3                                           | Mnz        |        |       |       |       |      |       | 0.65  |      |      | 33.93 |      | 1.55 |    |      |       | 0.12 |     |      |       | 2.14 | 18.15 | 33.74 | 9.73  |      |     | 100   | 109          |
| S25    | 20.1 | 4                                           | Qz         | 100.00 |       |       |       |      |       |       |      |      |       |      |      |    |      |       |      |     |      |       |      |       |       |       |      |     | 100   | 124          |
|        |      | Notes                                       |            |        |       |       |       |      |       |       |      |      |       |      |      |    |      |       |      |     |      |       |      |       |       |       |      |     |       |              |
|        |      | + = indicates more than one mineral present |            |        |       |       |       |      |       |       |      |      |       |      |      |    |      |       |      |     |      |       |      |       |       |       |      |     |       |              |
|        |      | * * = indicates that mineral is altered     |            |        |       |       |       |      |       |       |      |      |       |      |      |    |      |       |      |     |      |       |      |       |       |       |      |     |       |              |

B14: SEM-BSE images and EDS mineral analyses for sample S26.

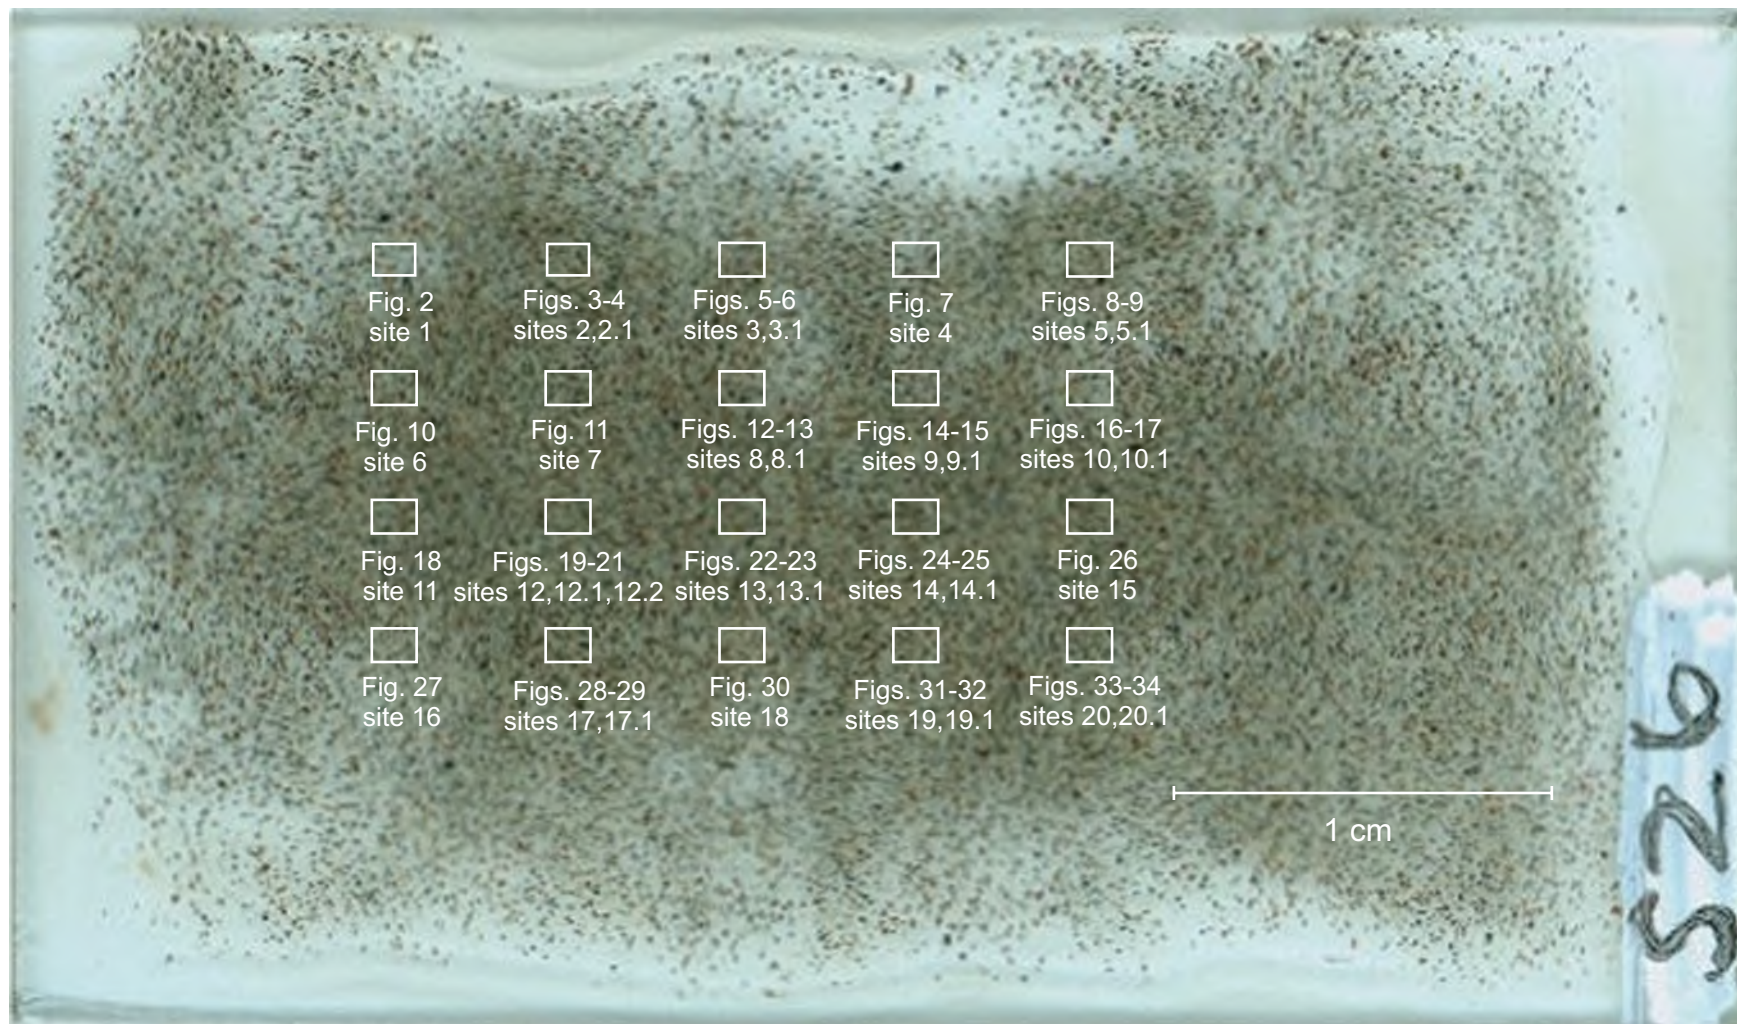

Figure B14.1: Sample S26



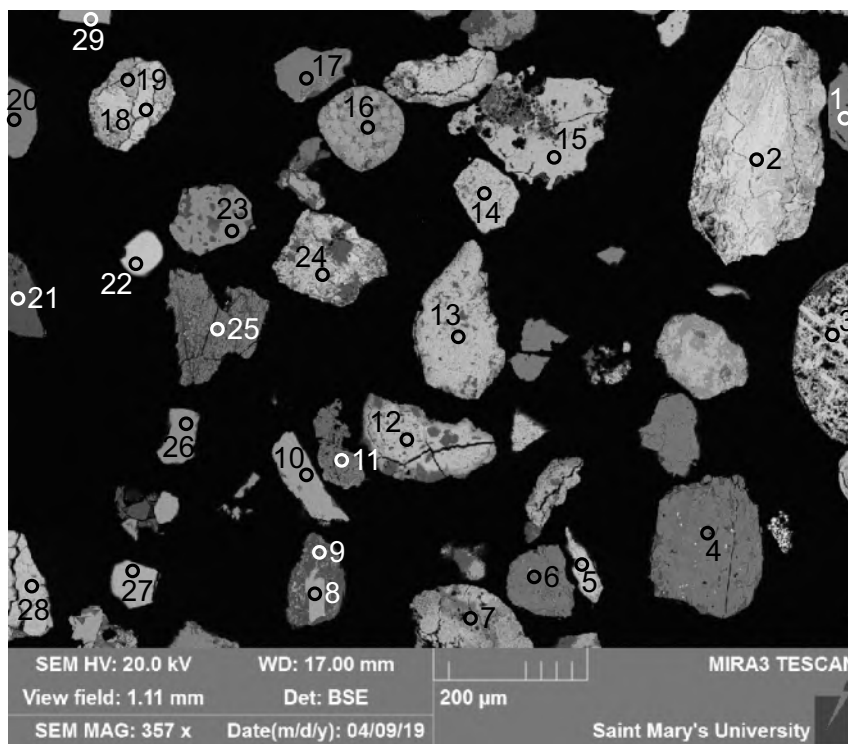

- 1:Epidote
- 2:Fe-oxide/hydroxide
- 3:Fe-oxide/hydroxide
- 4:Amphibole
- 5:Fe-oxide/hydroxide +
- 6:Amphibole
- 7:Fe-oxide/hydroxide + Chlorite +
- 8:TiO<sub>2</sub>
- 9:Mix
- 10:TiO<sub>2</sub>
- 11:Clinopyroxene
- 12:Fe-oxide/hydroxide +
- 13:Fe-oxide/hydroxide +
- 14:Fe-oxide/hydroxide +
- 15:Fe-oxide/hydroxide +
- 16:Fe-oxide/hydroxide +
- 17:Spinel
- 18:Fe-oxide/hydroxide +
- 19:Fe-oxide/hydroxide +
- 20:Epidote
- 21:Quartz
- 22:Ilmenite
- 23:Titanite
- 24:Fe-oxide/hydroxide +
- 25:Epidote
- 26:Garnet
- 27:Chromite
- 28:Fe-oxide/hydroxide +
- 29:Chromite

Figure B14.2: Sample S26 site 1 (SEM). The detrital minerals include: Feohy, Ilm, TiO<sub>2</sub>, Chr, Spl, Grt, Ep, Ttn, Cpx, Amph, Kfs, Qz.

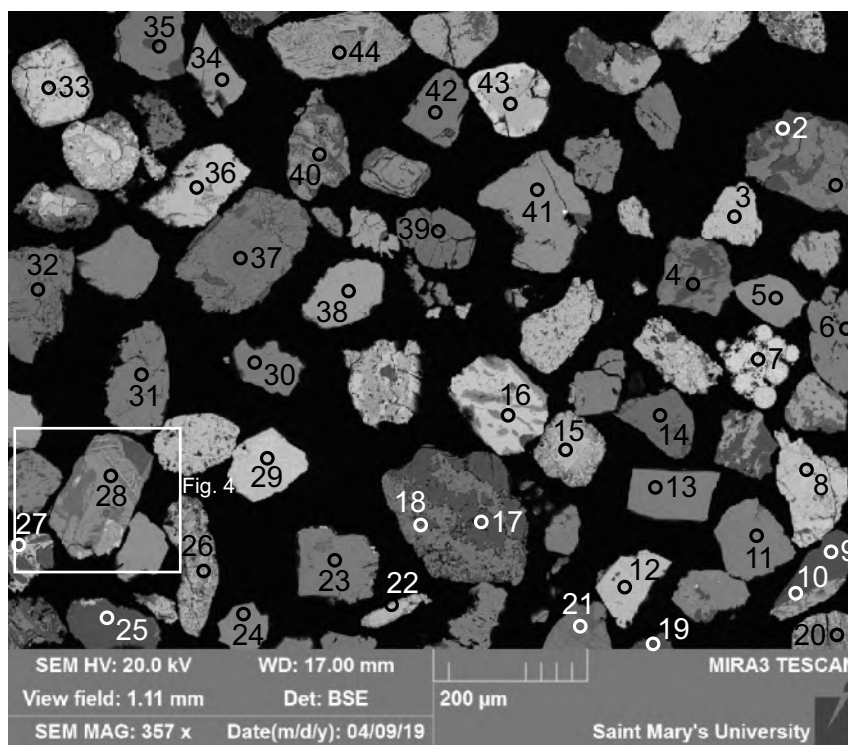

- 1:Epidote
- 2:Quartz
- 3:Fe-oxide/hydroxide +
- 4:Quartz +
- 5:Apatite
- 6:Epidote
- 7:Pyrite
- 8:Fe-oxide/hydroxide +
- 9:Quartz
- 10:Mix
- 11:Epidote
- 12:Fe-oxide/hydroxide +
- 13:Epidote
- 14:Epidote
- 15:Fe-oxide/hydroxide +
- 16:Ilmenite
- 17:Albite
- 18:Epidote
- 19:Quartz
- 20:Chromite + Chlorite +
- 21:Chromite + Chlorite
- 22:Fe-oxide/hydroxide +
- 23:Epidote
- 24:Garnet
- 25:Quartz + Fe-oxide/hydroxide
- 26:Fe-oxide/hydroxide +
- 27:Quartz + Fe-oxide/hydroxide
- 28:Titanite
- 29:Fe-oxide/hydroxide +
- 30:Epidote
- 31:Epidote
- 32:Amphibole
- 33:Fe-oxide/hydroxide +
- 34:Garnet
- 35:Quartz + Epidote
- 36:Fe-oxide/hydroxide +
- 37:Amphibole
- 38:TiO<sub>2</sub>
- 39:Clinopyroxene
- 40:Garnet
- 41:Titanite
- 42:Garnet
- 43:Chromite
- 44:TiO<sub>2</sub> +

Figure B14.3: Sample S26 site 2 (SEM). The detrital minerals include: Feohy, Ilm, TiO<sub>2</sub>, Chr, Spl, Grt, Ep, Ttn, Cpx, Amph, Pl (Ab), Qz, Ap, Chl, Py.

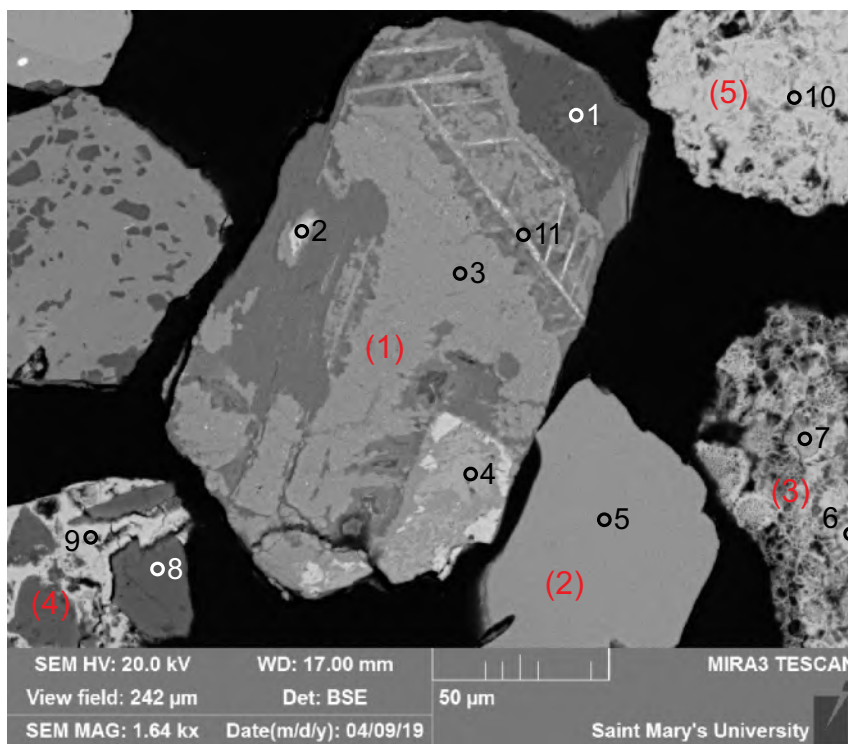

- 1: Albite +
- 2: Ilmenite +
- 3: Titanite
- 4:  $\text{TiO}_2$
- 5: Garnet
- 6: Fe-oxide/hydroxide +
- 7: Fe-oxide/hydroxide +
- 8: Quartz
- 9: Fe-oxide/hydroxide +
- 10: Fe-oxide/hydroxide +
- 11: Titanite + Chlorite

Figure B14.4: Sample S26 site 2.1 (SEM). 1: Lithic clast (albite + titanite + relics of ilmenite probably altering to titanite +  $\text{TiO}_2$  probably with Fe-oxide/hydroxide corona rim, metamorphic). 2: A detrital garnet grain. 3: Pedogenic aggregate with Fe-oxide/hydroxide. 4: Pedogenic aggregate with Fe-oxide/hydroxide cementing quartz grains. 5: Fe-oxide/hydroxide probably pedogenic.

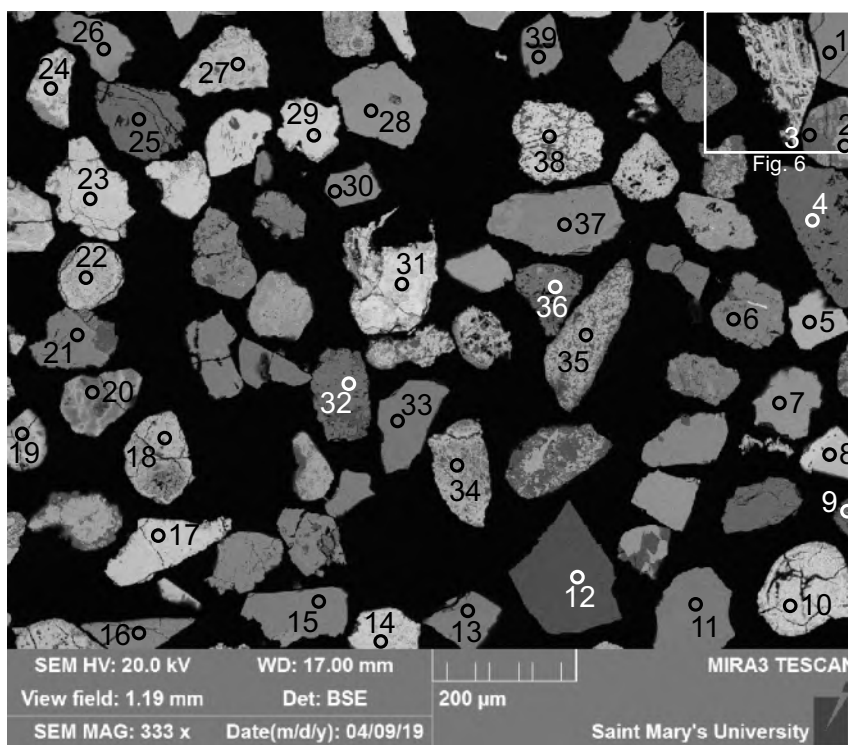

- 1: Spinel
- 2:  $\text{TiO}_2$
- 3: Chlorite
- 4: Epidote
- 5: Chromite
- 6: Epidote
- 7: Titanite
- 8: Chromite
- 9: Muscovite +
- 10: Fe-oxide/hydroxide +
- 11: Amphibole
- 12: Quartz
- 13: Epidote
- 14: Fe-oxide/hydroxide +
- 15: Garnet
- 16: Apatite +
- 17: Fe-oxide/hydroxide +
- 18: Fe-oxide/hydroxide +
- 19: Fe-oxide/hydroxide +
- 20: Fe-oxide/hydroxide +
- 21: Epidote
- 22: Fe-oxide/hydroxide +
- 23: Fe-oxide/hydroxide +
- 24: "Ilmenite"
- 25: Amphibole (Tremolite?)
- 26: Spinel
- 27: Fe-oxide/hydroxide +
- 28: Apatite
- 29: Fe-oxide/hydroxide +
- 30: Epidote
- 31: Fe-oxide/hydroxide
- 32: Epidote
- 33: Spinel
- 34: "Chromite" +
- 35: Fe-oxide/hydroxide + Quartz
- 36: Epidote
- 37: Epidote
- 38: Chromite +
- 39: Garnet +

Figure B14.5: Sample S26 site 3 (SEM). The detrital minerals include: Feohy, Ilm,  $\text{TiO}_2$ , Chr, Spl, Grt, Ep, Ttn, Amph, Ms, Qz, Ap, Chl.

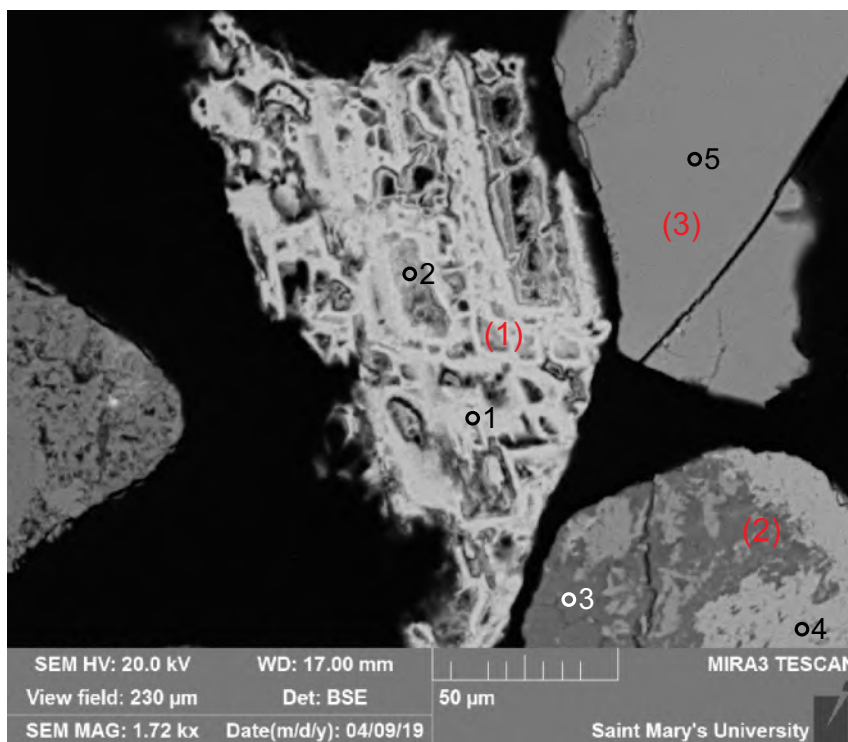

- 1: Fe-oxide/hydroxide +
- 2: Fe-oxide/hydroxide +
- 3: Chlorite
- 4:  $\text{TiO}_2$  +
- 5: Spinel

Figure B14.6: Sample S26 site 3.1 (SEM). 1: Pedogenically affected Fe-oxide/hydroxide. 2: Lithic clast made up of  $\text{TiO}_2$  + chlorite, metamorphic. 3: Detrital spinel grain.

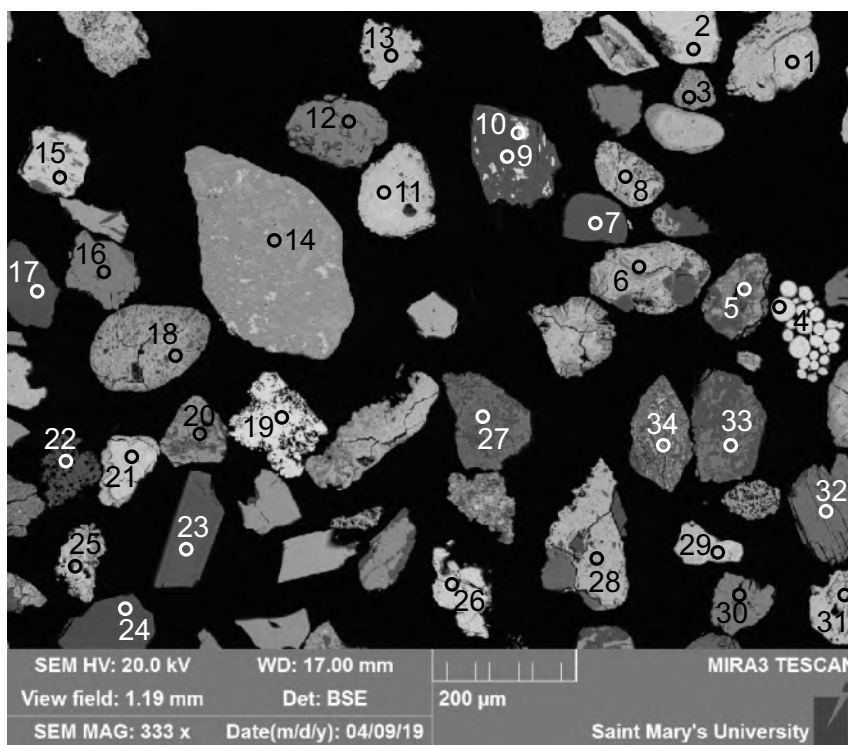

- 1: Fe-oxide/hydroxide + Chlorite +
- 2: Fe-oxide/hydroxide + 29: Fe-oxide/hydroxide +
- 3: Titanite 30: Epidote
- 4: Pyrite 31: Fe-oxide/hydroxide +
- 5: Quartz +  $\text{TiO}_2$  32: Clinopyroxene
- 6: Fe-oxide/hydroxide + Chlorite 33: Epidote +
- 7: Kaolinite + 34: Chlorite
- 8: Fe-oxide/hydroxide +
- 9: Serpentine
- 10: Fe-oxide/hydroxide +
- 11: Fe-oxide/hydroxide +
- 12: Plagioclase (Andesite) +
- 13: Fe-oxide/hydroxide +
- 14:  $\text{TiO}_2$  +
- 15: Ilmenite
- 16: Epidote
- 17: Quartz
- 18: Fe-oxide/hydroxide + Chlorite +
- 19: Fe-oxide/hydroxide
- 20:  $\text{TiO}_2$  +
- 21: Fe-oxide/hydroxide +
- 22: Quartz
- 23: Tourmaline
- 24: Quartz
- 25: Fe-oxide/hydroxide +
- 26: Fe-oxide/hydroxide
- 27: Epidote
- 28: Fe-oxide/hydroxide +

Figure B14.7: Sample S26 site 4 (SEM). The detrital minerals include: Ilm,  $\text{TiO}_2$ , Grt, Tur, Ep, Ttn, Cpx, Pl (And), Qz, Chl, Py, Kln. Some of the Feohy may also be detrital grains.



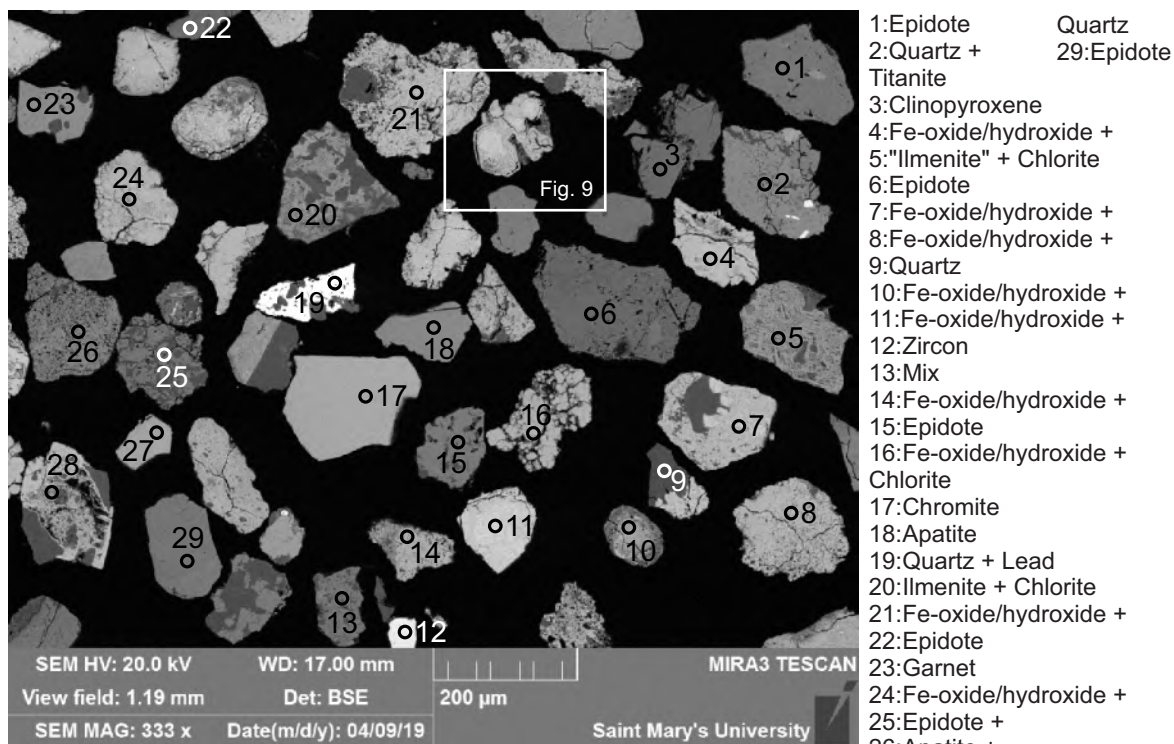

Figure B14.8: Sample S26 site 5 (SEM). The detrital minerals include: Ilm, Chr, Grt, Ep, Zrn, Ttn, Cpx, Kfs, Qz, Ap. Chl. Some of the Feohy grains appear to be detrital.

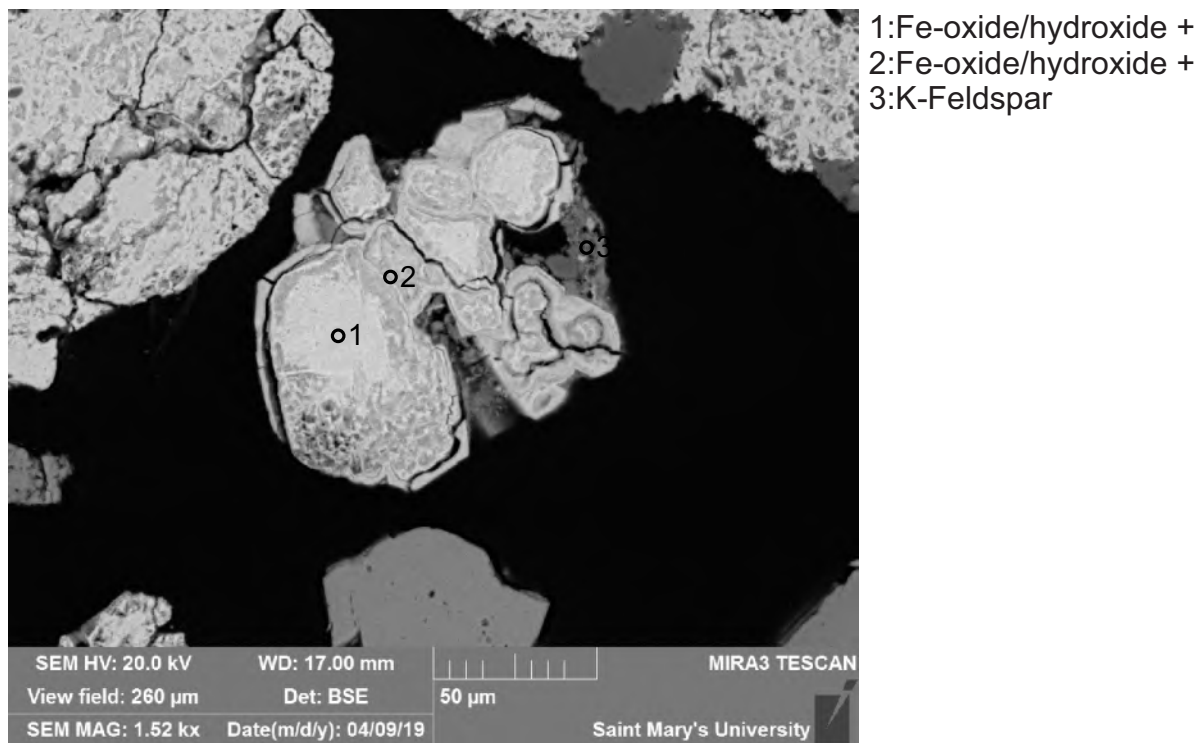

Figure B14.9: Sample S26 site 5.1 (SEM). Probably a lithic clast made up of magnetite grains, pedogenically affected, and K-feldspar. Igneous.

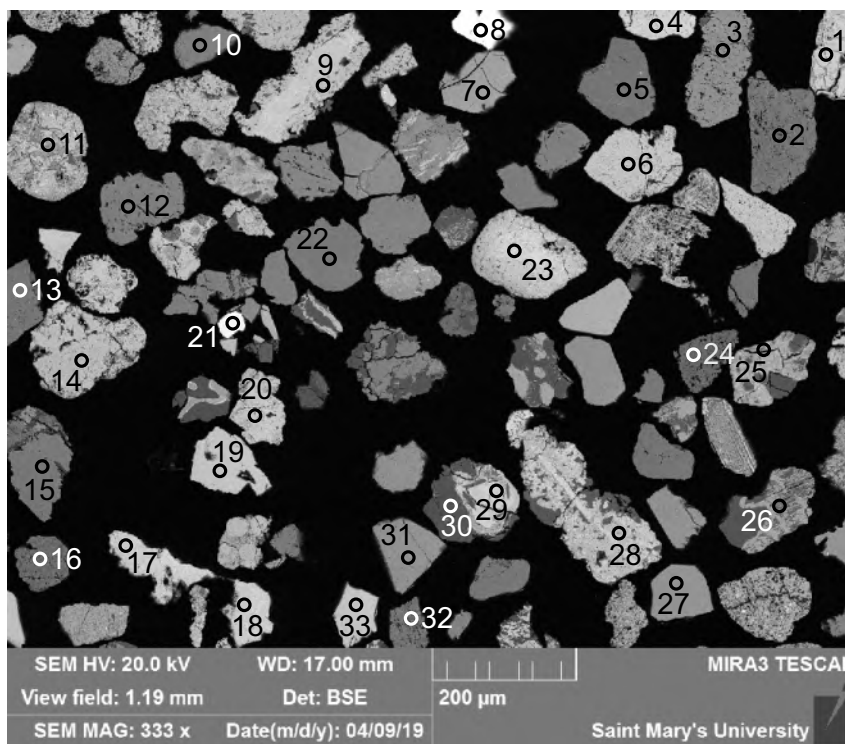

- |                               |                         |
|-------------------------------|-------------------------|
| 1:Fe-oxide/hydroxide +        | 29:Fe-oxide/hydroxide + |
| 2:Epidote                     | 30:Quartz               |
| 3:Titane                      | 31:Apatite              |
| 4:Fe-oxide/hydroxide + Quartz | 32:Epidote              |
| 5:Epidote                     | 33:Chromite             |
| 6:Fe-oxide/hydroxide +        |                         |
| 7:Chromite                    |                         |
| 8:Cu-Zn oxide                 |                         |
| 9:Fe-oxide/hydroxide +        |                         |
| 10:Epidote                    |                         |
| 11:Fe-oxide/hydroxide +       |                         |
| 12:Epidote                    |                         |
| 13:Clinopyroxene              |                         |
| 14:Fe-oxide/hydroxide +       |                         |
| 15:Clinopyroxene              |                         |
| 16:Epidote                    |                         |
| 17:Fe-oxide/hydroxide +       |                         |
| 18:Fe-oxide/hydroxide +       |                         |
| 19:Fe-oxide/hydroxide +       |                         |
| 20:Fe-oxide/hydroxide +       |                         |
| 21:Zircon                     |                         |
| 22:Epidote                    |                         |
| 23:Fe-oxide/hydroxide +       |                         |
| 24:Epidote                    |                         |
| 25:Fe-oxide/hydroxide +       |                         |
| 26:"Ilmenite" + Chlorite +    |                         |
| 27:Apatite                    |                         |
| 28:Fe-oxide/hydroxide +       |                         |

Figure B14.10: Sample S26 site 6 (SEM). The detrital minerals include: Ilm, Chr, Ep, Ttn, Zrn, Cpx, Qz, Ap, Chl and some Feohy.

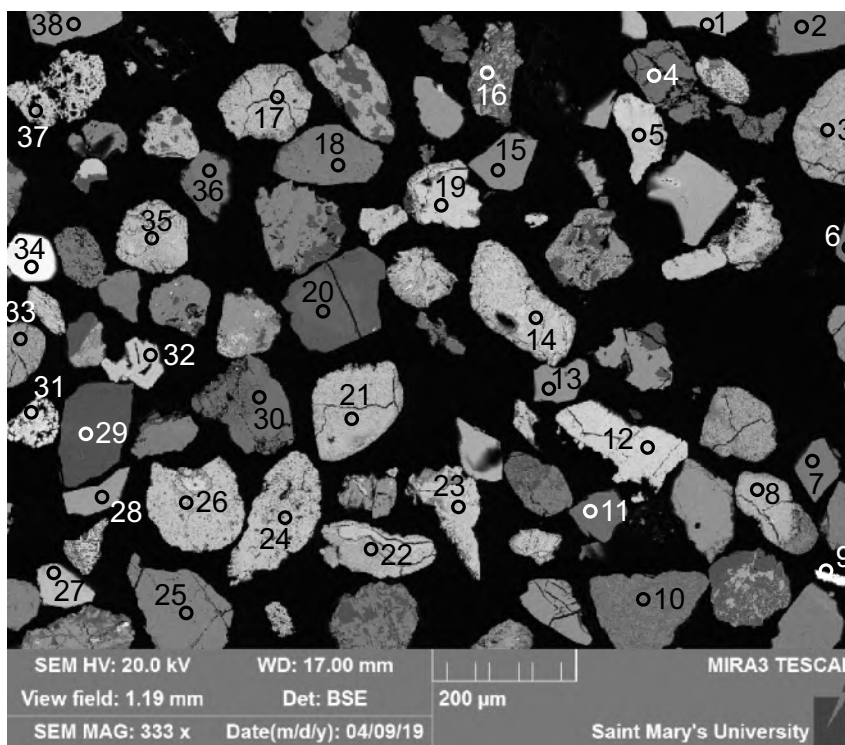

- |                                   |                         |
|-----------------------------------|-------------------------|
| 1:Chromite                        | 31:Pyrite               |
| 2:Epidote                         | 32:Fe-oxide/hydroxide + |
| 3:Fe-oxide/hydroxide +            | 33:TiO <sub>2</sub> +   |
| 4:Epidote +                       | 34:Zircon               |
| 5:Fe-oxide/hydroxide +            | 35:Fe-oxide/hydroxide   |
| 6:Epidote                         | 36:Epidote              |
| 7:Staurolite                      | 37:Fe-oxide/hydroxide + |
| 8:Fe-oxide/hydroxide + Chlorite + | 38:Spinel               |
| 9:Cassiterite                     |                         |
| 10:Epidote                        |                         |
| 11:Amphibole                      |                         |
| 12:Fe-oxide/hydroxide +           |                         |
| 13:Apatite                        |                         |
| 14:Fe-oxide/hydroxide +           |                         |
| 15:Spinel                         |                         |
| 16:TiO <sub>2</sub> +             |                         |
| 17:Fe-oxide/hydroxide +           |                         |
| 18:Epidote                        |                         |
| 19:Fe-oxide/hydroxide +           |                         |
| 20:Tourmaline                     |                         |
| 21:Fe-oxide/hydroxide +           |                         |
| 22:Fe-oxide/hydroxide +           |                         |
| 23:Fe-oxide/hydroxide +           |                         |
| 24:Fe-oxide/hydroxide + Chlorite  |                         |
| 25:Epidote                        |                         |
| 26:Fe-oxide/hydroxide +           |                         |
| 27:Chromite                       |                         |
| 28:Titane                         |                         |
| 29:Quartz                         |                         |
| 30:Epidote                        |                         |

Figure B14.11: Sample S26 site 7 (SEM). The detrital minerals include: TiO<sub>2</sub>, Chr, Spl, Tur, St, Ep, Ttn, Zrn, Cst, Amph, Qz, Ap, Chl and some Feohy (e.g. 12).



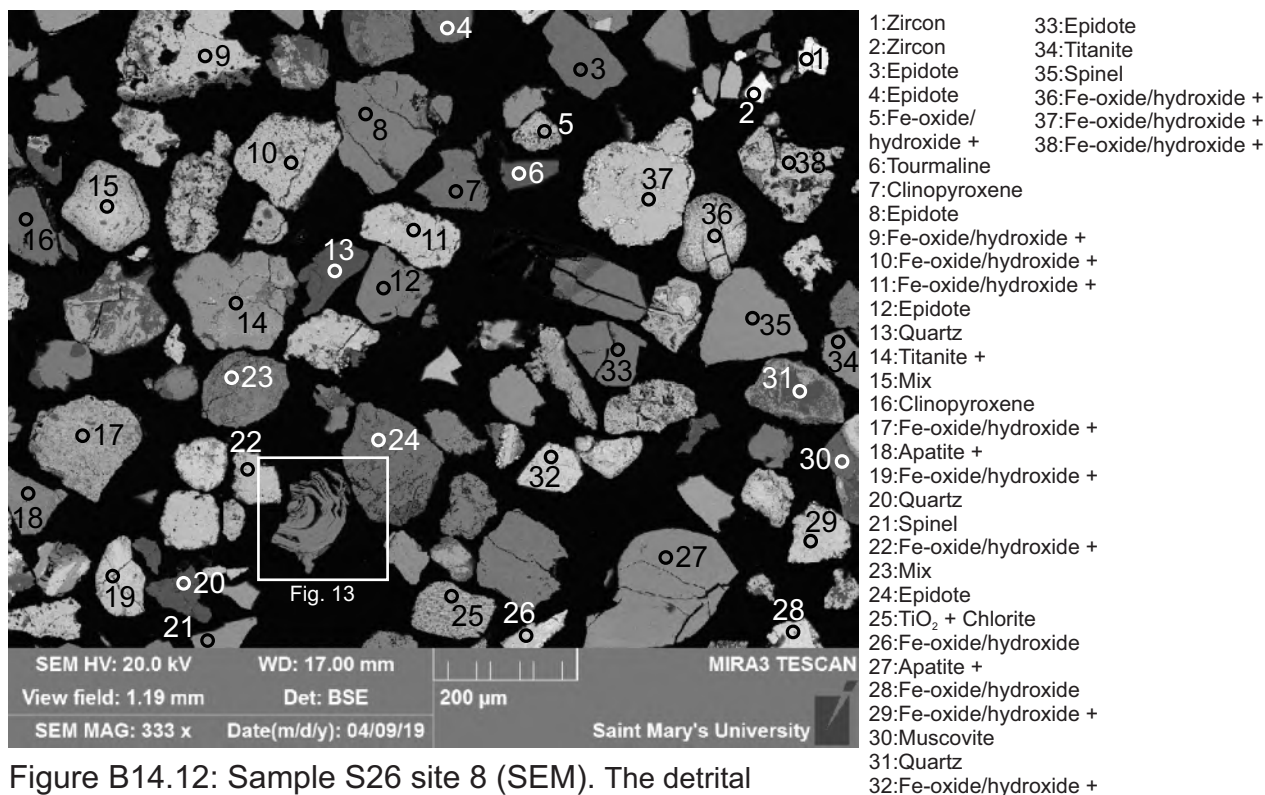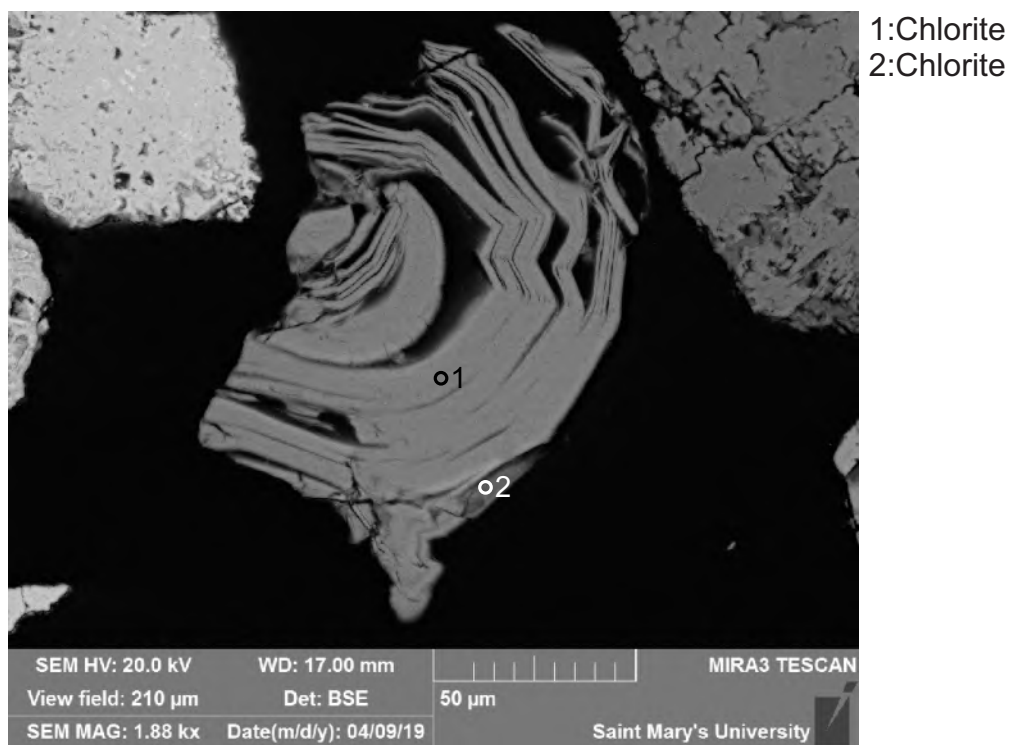

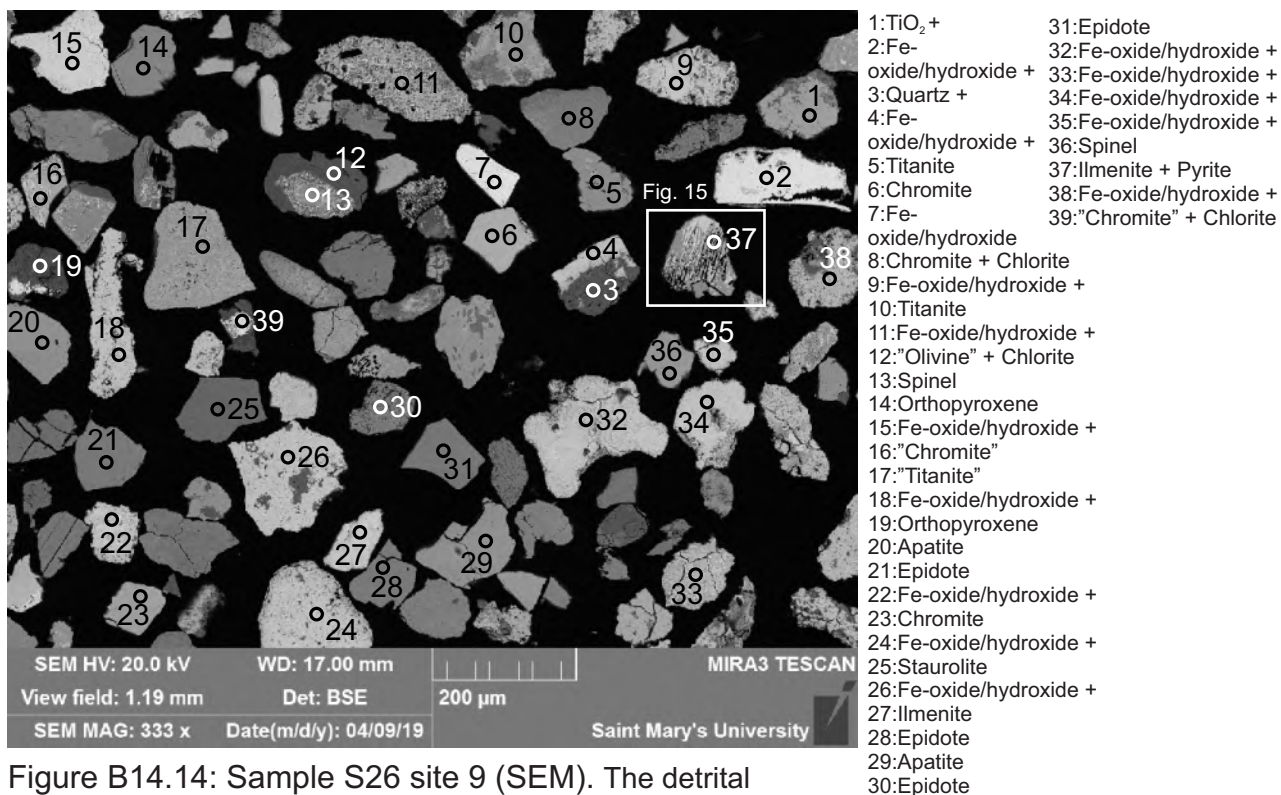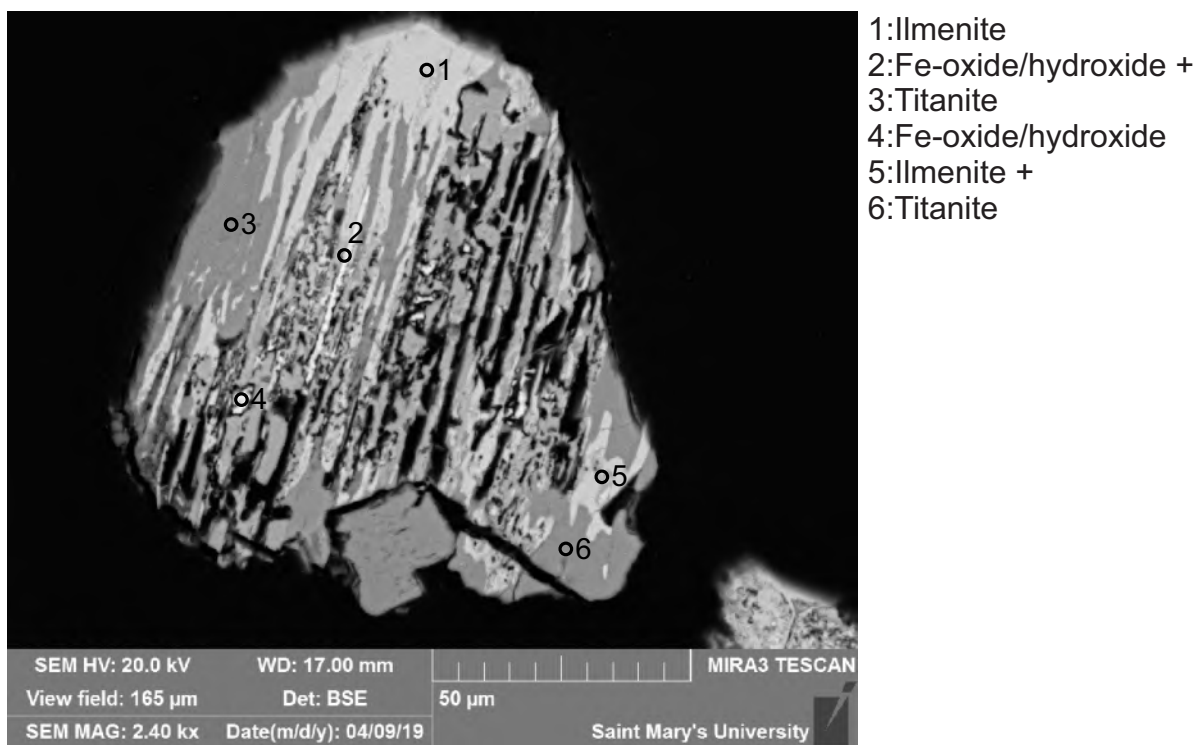

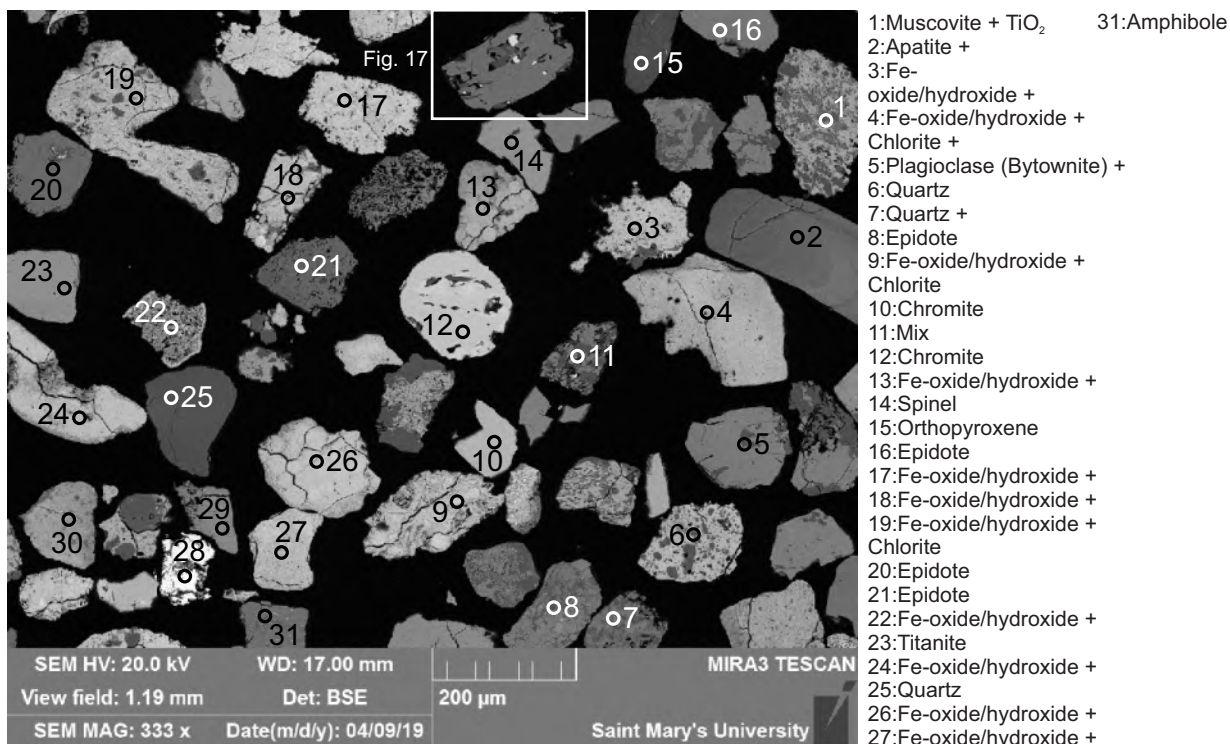

Figure B14.16: Sample S26 site 10 (SEM). The detrital minerals include: Chr, Spl, Ep, Ttn, Opx, Amph, PI (probably bytownite), Ms, Qz, Ap, Chl and Feohy grains.

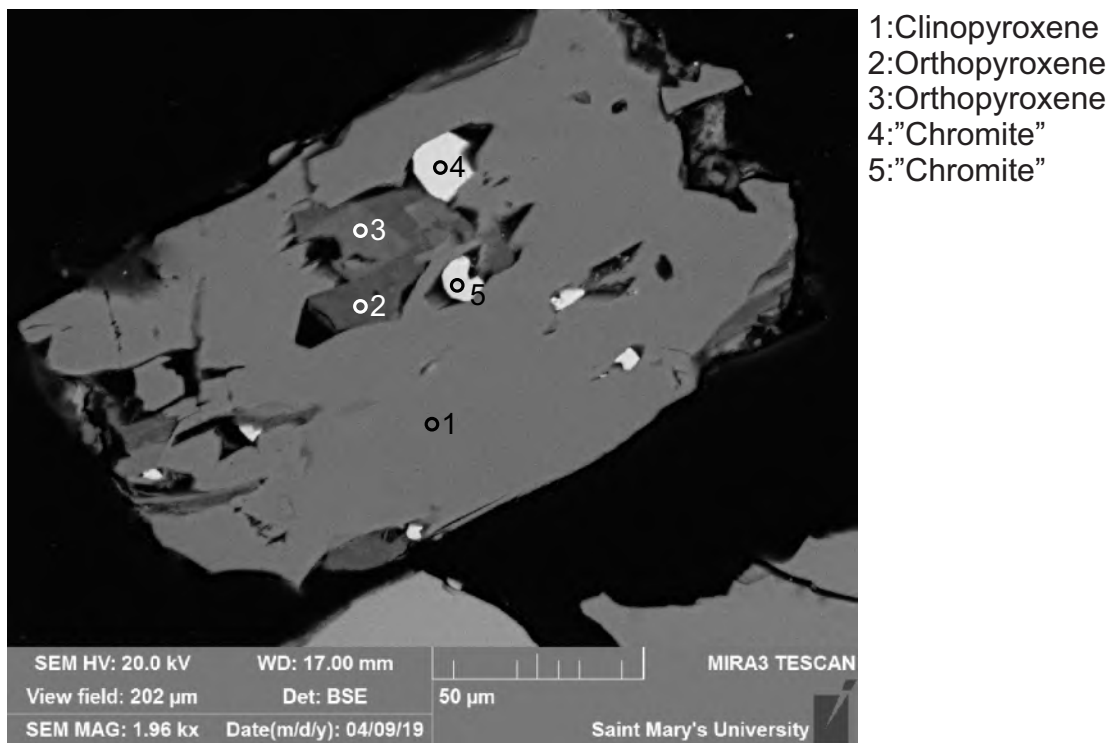

Figure B14.17: Sample S26 site 10.1 (SEM). Detrital clinopyroxene grain, with partially dissolved orthopyroxene patches, and altered chromite inclusions filling voids. Ophiolite.



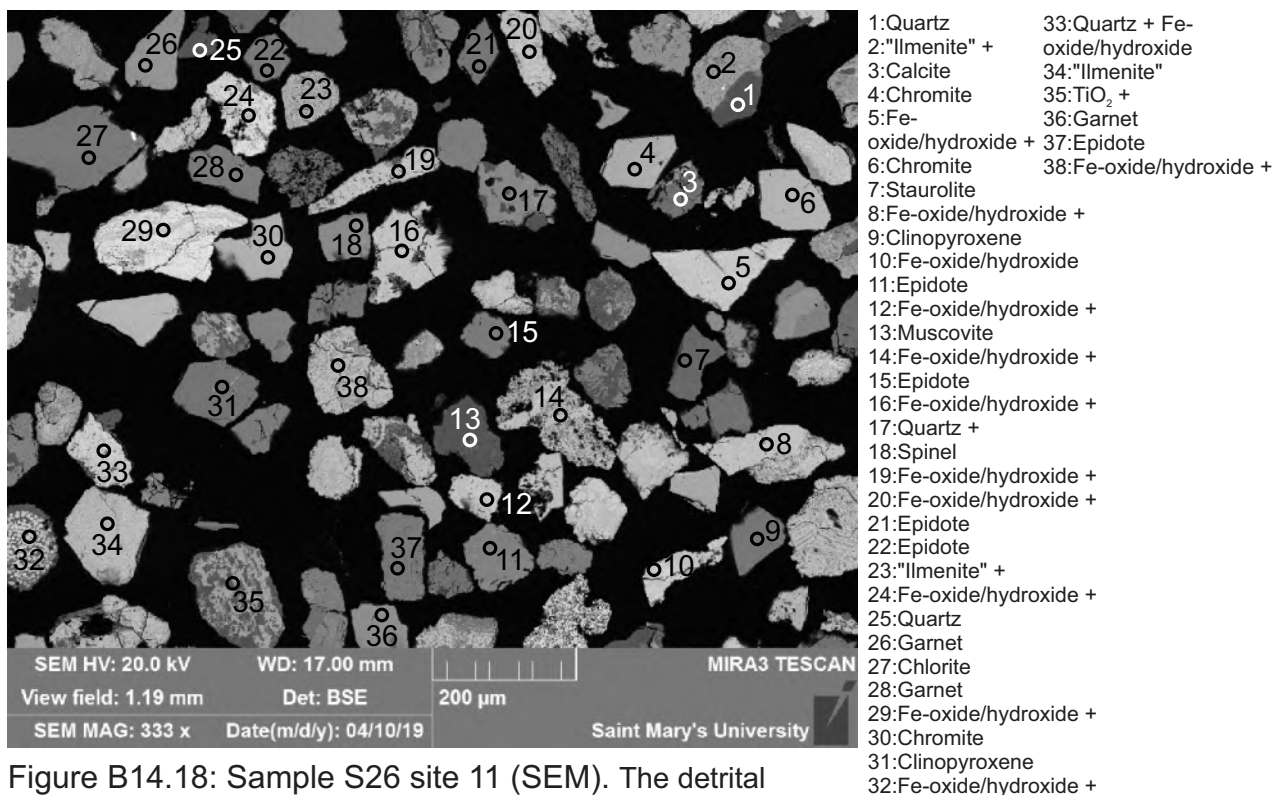

Figure B14.18: Sample S26 site 11 (SEM). The detrital minerals include: Ilm, TiO<sub>2</sub>, Feohy, Chr, Spl, Grt, St, Ep, Cpx, Ms, Qz, Chl, Cal.

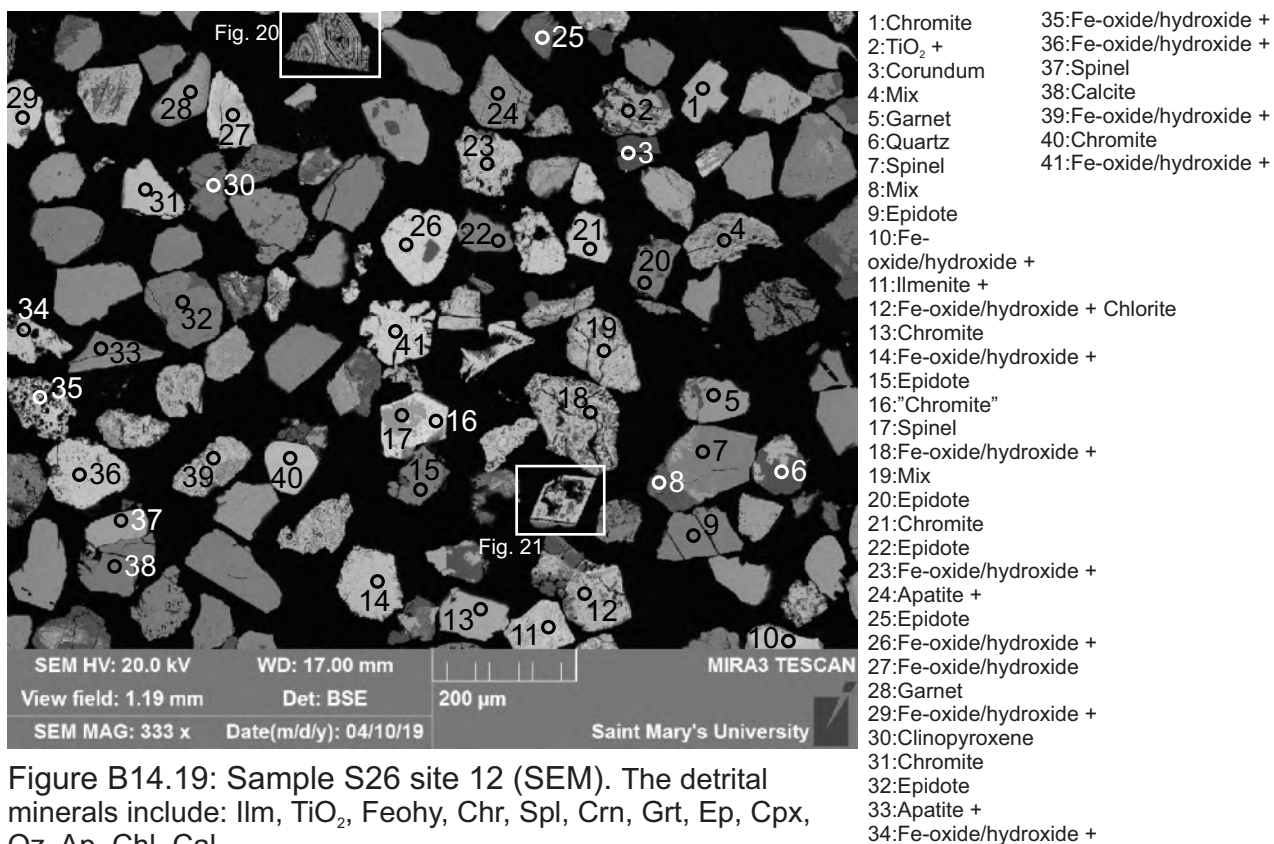

Figure B14.19: Sample S26 site 12 (SEM). The detrital minerals include: Ilm, TiO<sub>2</sub>, Feohy, Chr, Spl, Crn, Grt, Ep, Cpx, Qz, Ap, Chl, Cal.

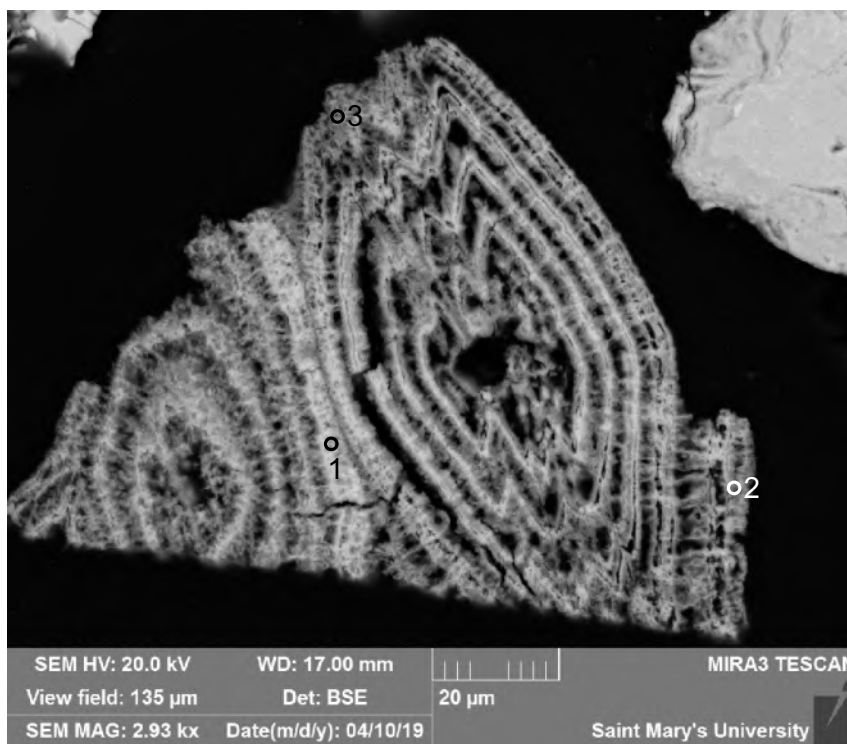

- 1:Fe-oxide/hydroxide + Chlorite +
- 2:Fe-oxide/hydroxide + Chlorite +
- 3:Fe-oxide/hydroxide + Chlorite +

Figure B14.20: Sample S26 site 12.1 (SEM). Altered detrital grains, probably amphibole (based on habit). Hydrothermal.

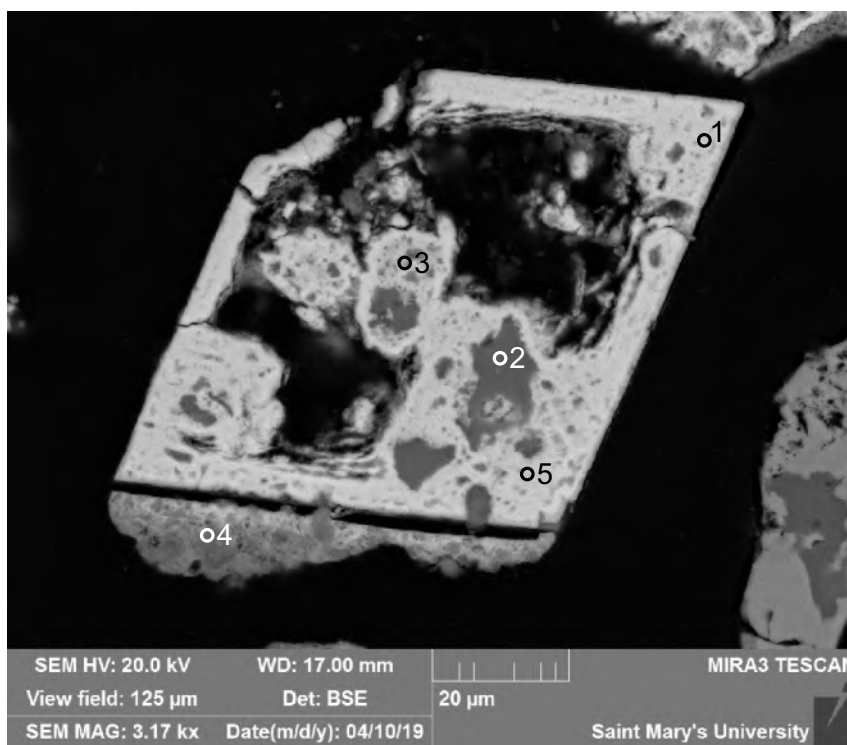

- 1:Fe-oxide/hydroxide +
- 2:Quartz
- 3:Fe-oxide/hydroxide +
- 4:Quartz +
- 5:Fe-oxide/hydroxide +

Figure B14.21: Sample S26 site 12.2 (SEM). Altered detrital grain, probably ilmenite with quartz inclusions.



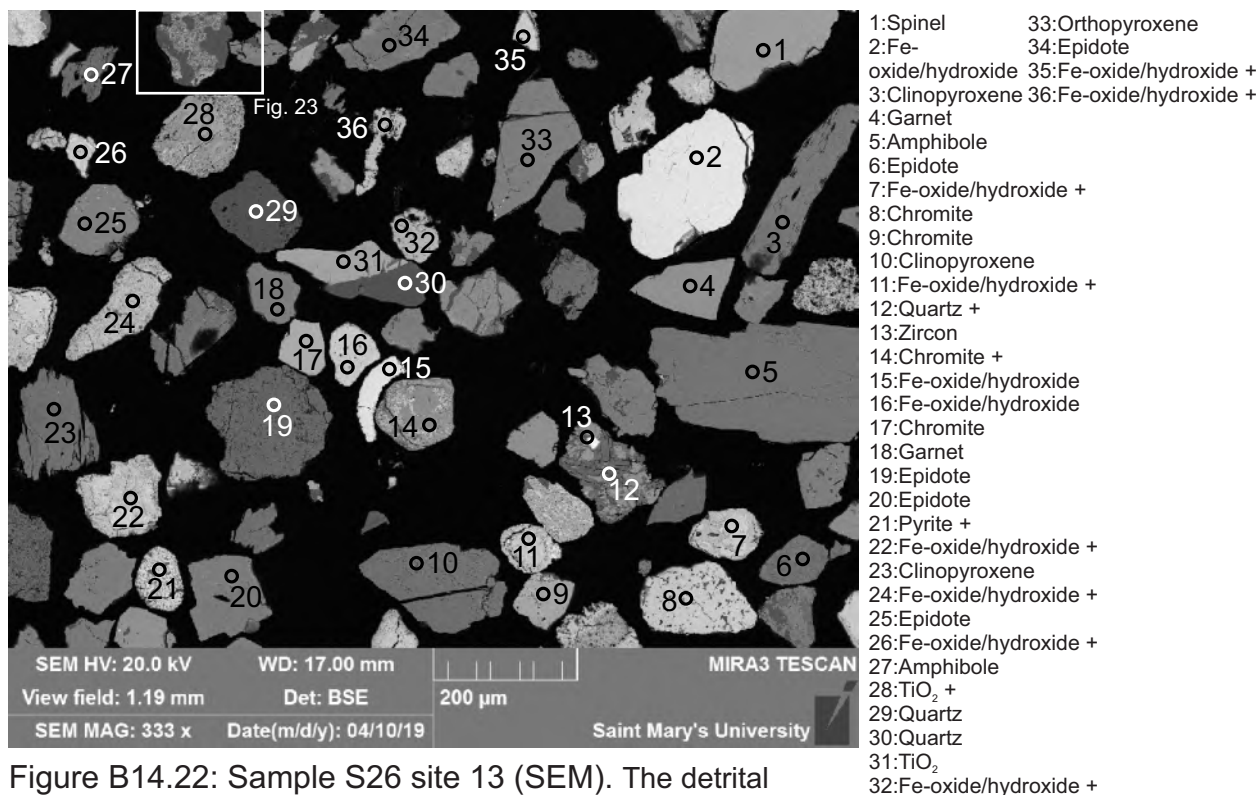

Figure B14.22: Sample S26 site 13 (SEM). The detrital minerals include: Feohy, TiO<sub>2</sub>, Chr, Spl, Grt, Ep, Zrn, Cpx, Opx, Amph, Qz, Py.

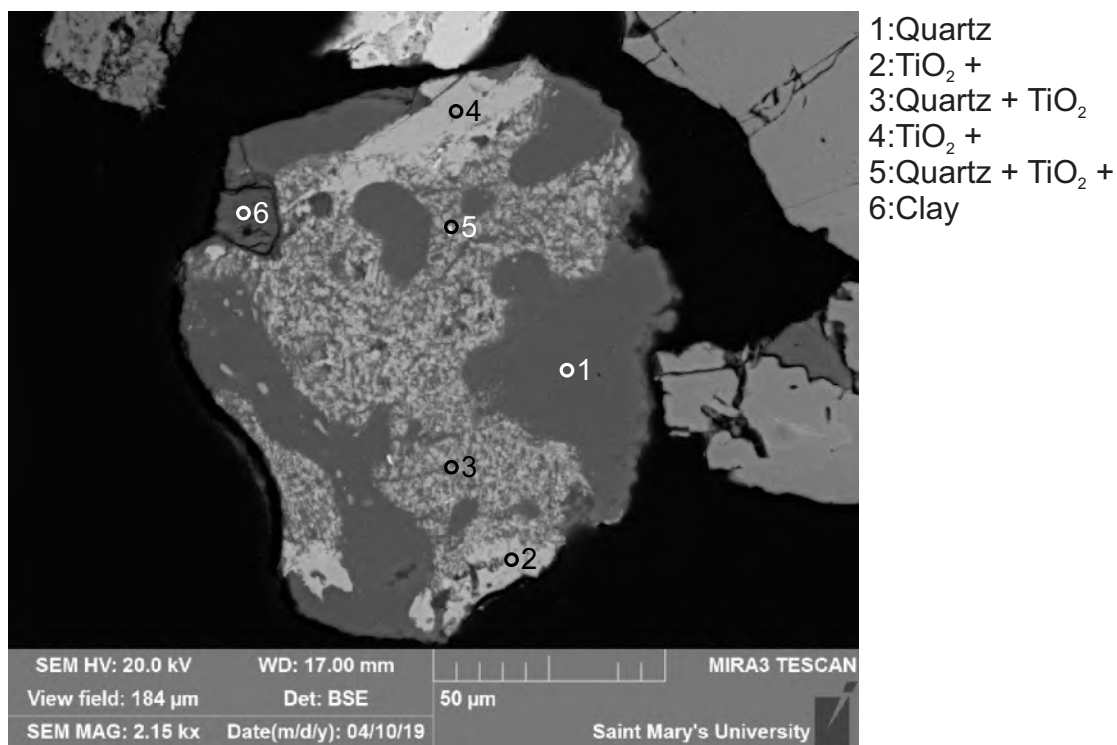

Figure B14.23: Sample S26 site 13.1 (SEM). Lithic clast made up of quartz + TiO<sub>2</sub> or a detrital ilmenite grain altered to TiO<sub>2</sub> with quartz inclusions. Metamorphic.

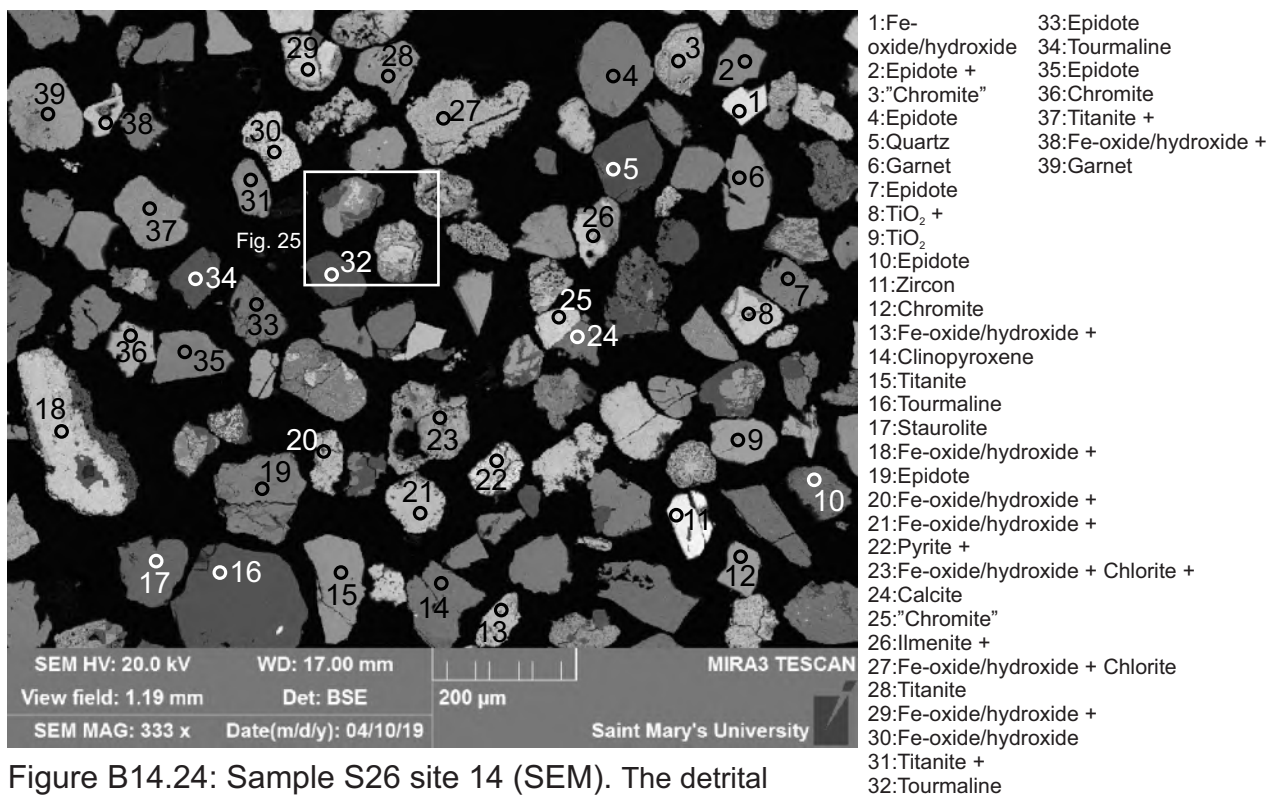

Figure B14.24: Sample S26 site 14 (SEM). The detrital minerals include: Feohy, Ilm, TiO<sub>2</sub>, Chr, Spl, Grt, Tur, St, Ep, Zrn, Ttn, Cpx, Ab, Qz, Chl, Py, Cal.

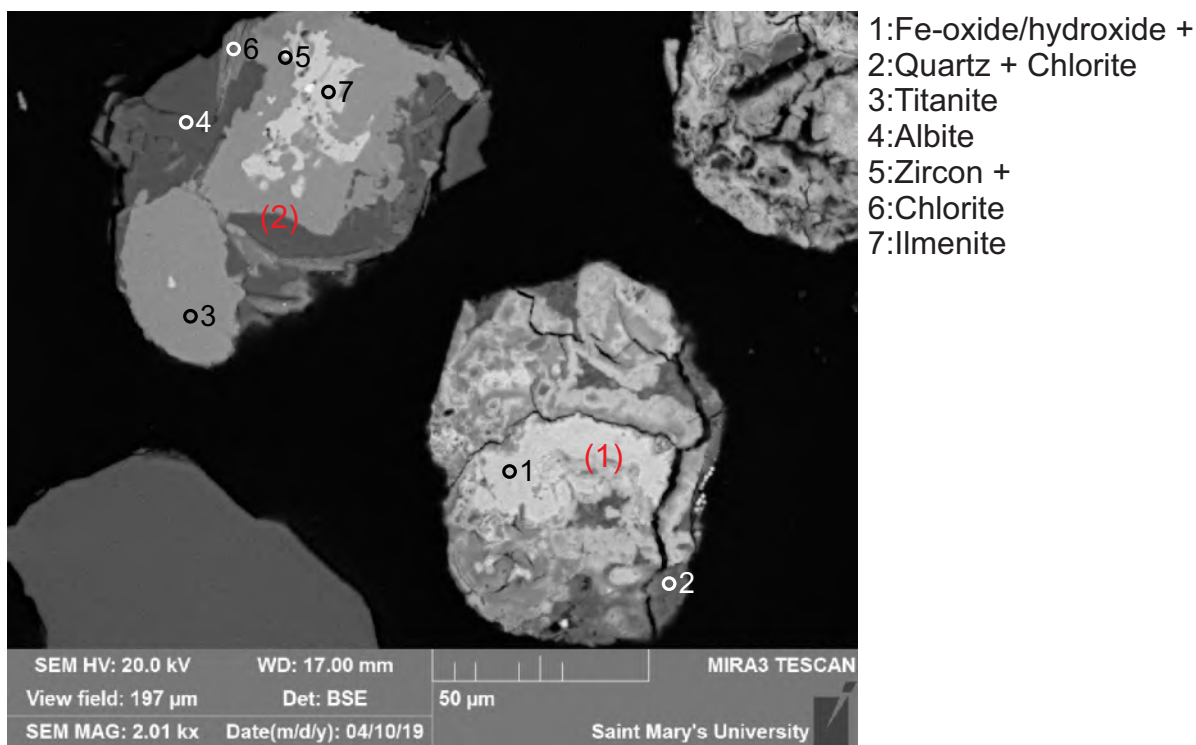

Figure B14.25: Sample S26 site 14.1 (SEM). 1: Pedogenic aggregate made up of Fe-oxide/hydroxide + quartz. 2: Lithic clast made up of titanite + albite + chlorite + ilmenite (probably altered to titanite and with zircon inclusions). Metamorphic.

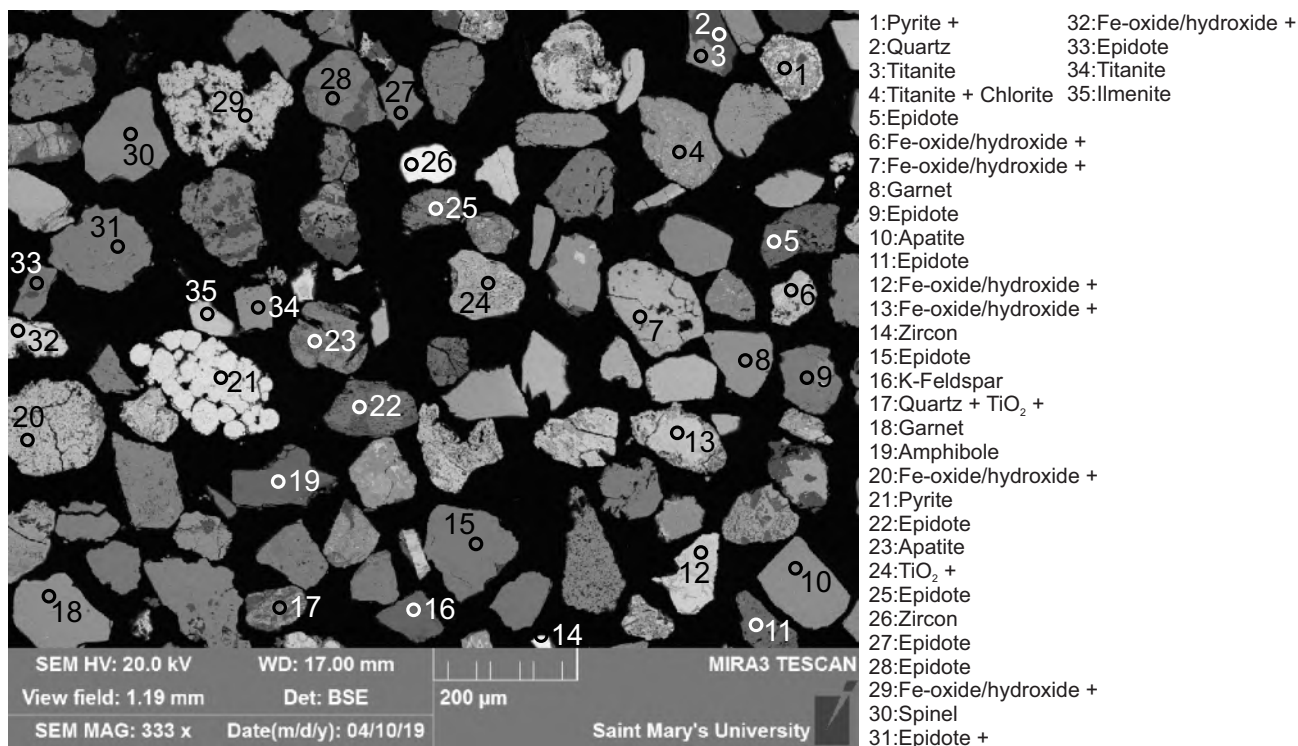

Figure B14.26: Sample S26 site 15 (SEM). The detrital minerals include: Feohy, Ilm, TiO<sub>2</sub>, Chr, Spl, Grt, Ep, Ttn, Zrn, Amph, Kfs, Qz, Ap, Chl, Py.

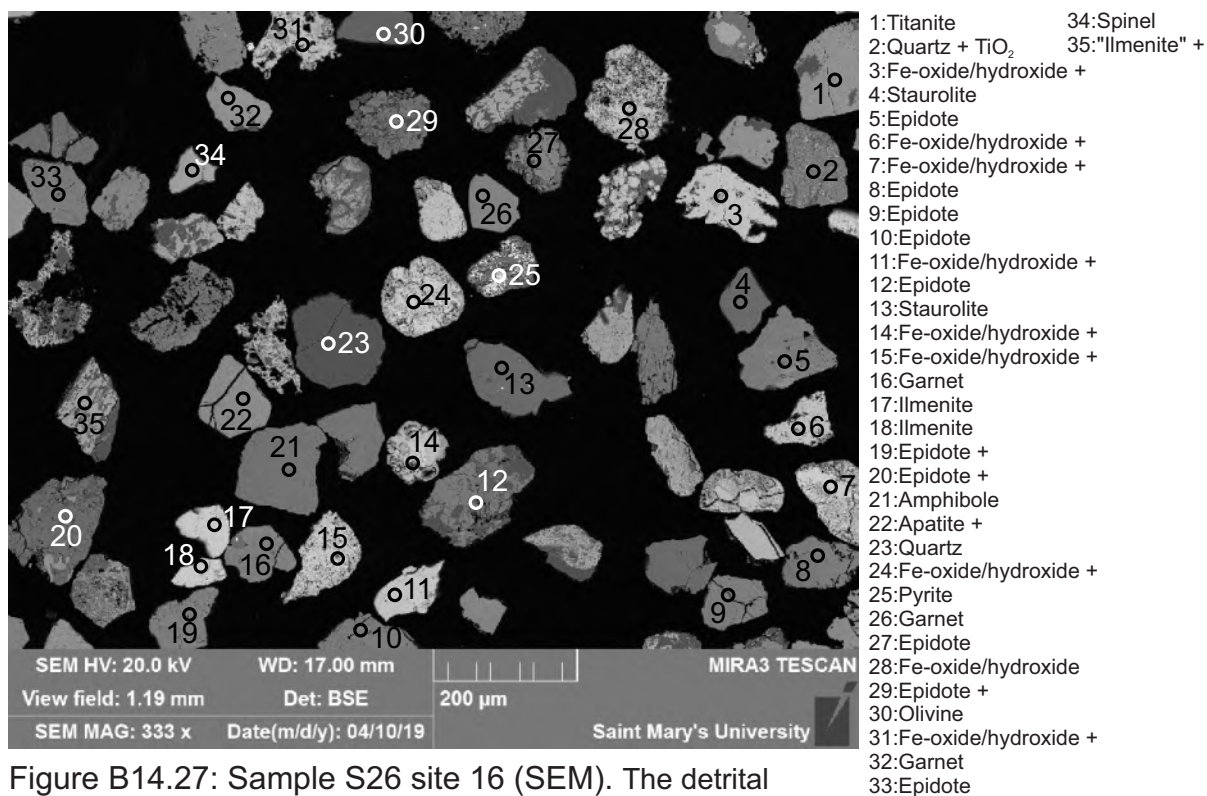

Figure B14.27: Sample S26 site 16 (SEM). The detrital minerals include: Feohy, Ilm, Chr, Grt, St, Ep, Ttn, Ol, Amph, Qz, Ap and Py.



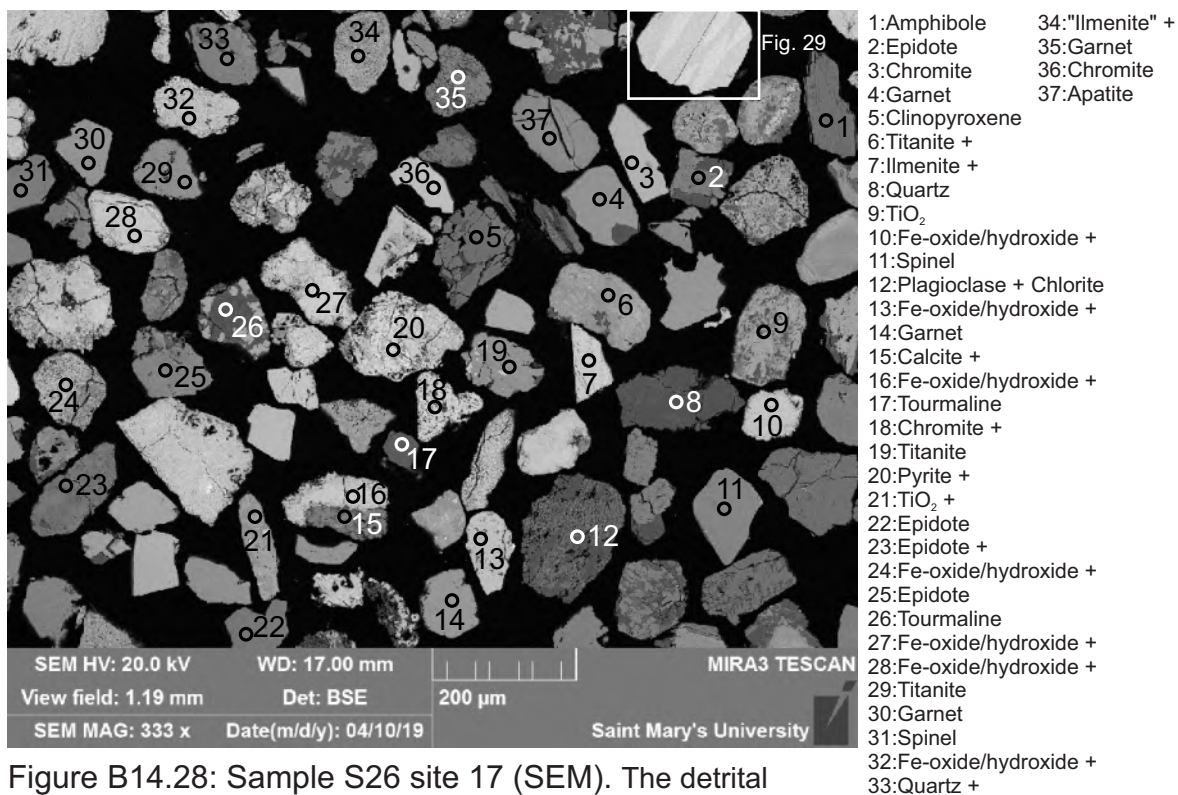

Figure B14.28: Sample S26 site 17 (SEM). The detrital minerals include: Feohy, Ilm, Chr, Spl, Grt, Tur, Ep, Ttn, Cpx, Amph, Pl, Qz, Ap, Chl, Cal, Py.

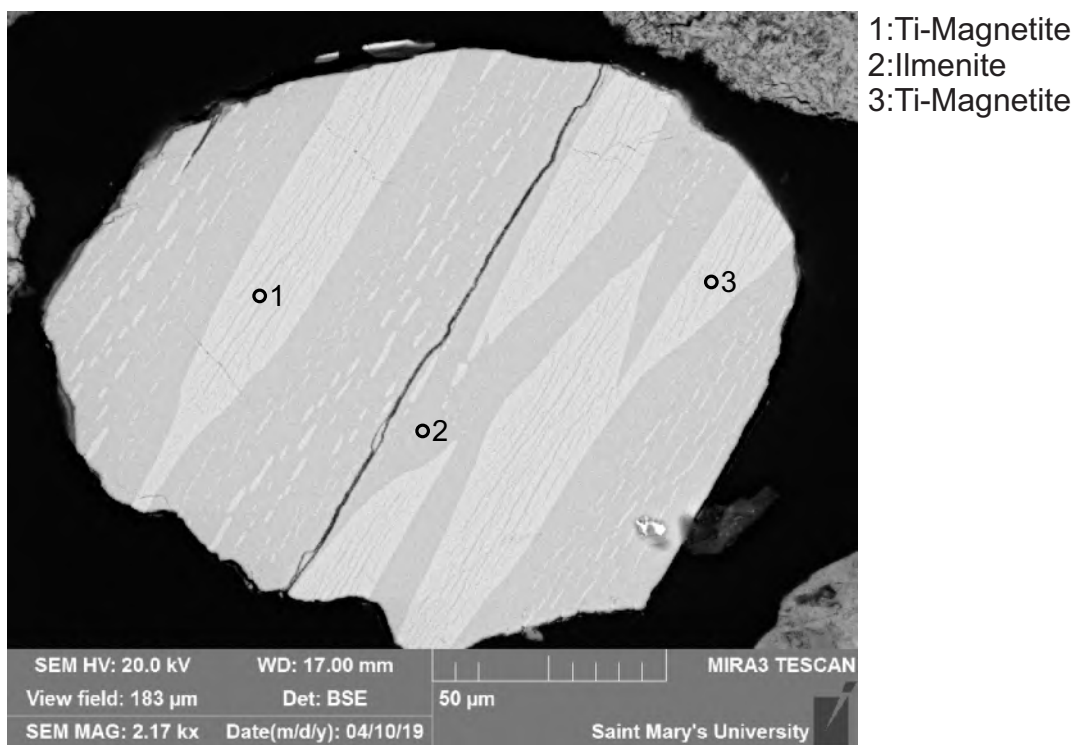

Figure B14.29: Sample S26 site 17.1 (SEM). Detrital Ti-magnetite grain with ilmenite exsolution lamellae or ilmenite with hematite exsolution lamellae.

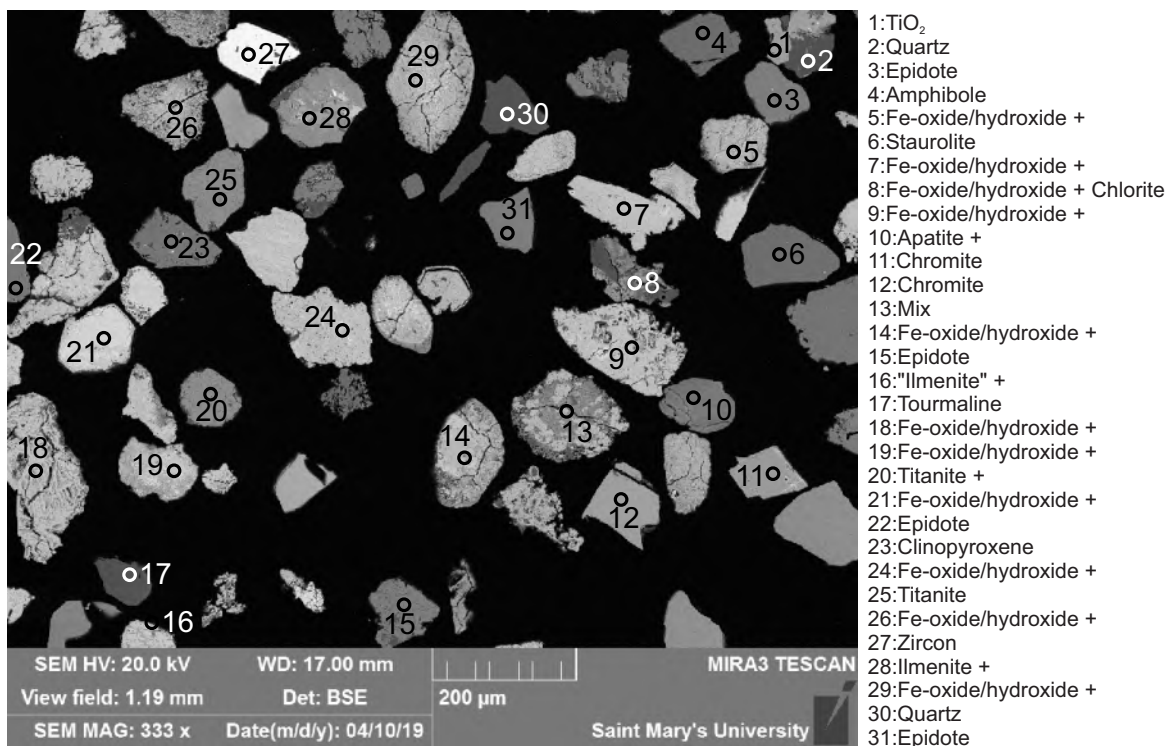

Figure B14.30: Sample S26 site 18 (SEM). The detrital minerals include: Feohy, Ilm, TiO<sub>2</sub>, Chr, Grt, Tur, St, Ep, Ttn, Zrn, Cpx, Amph, Qz, Ap.

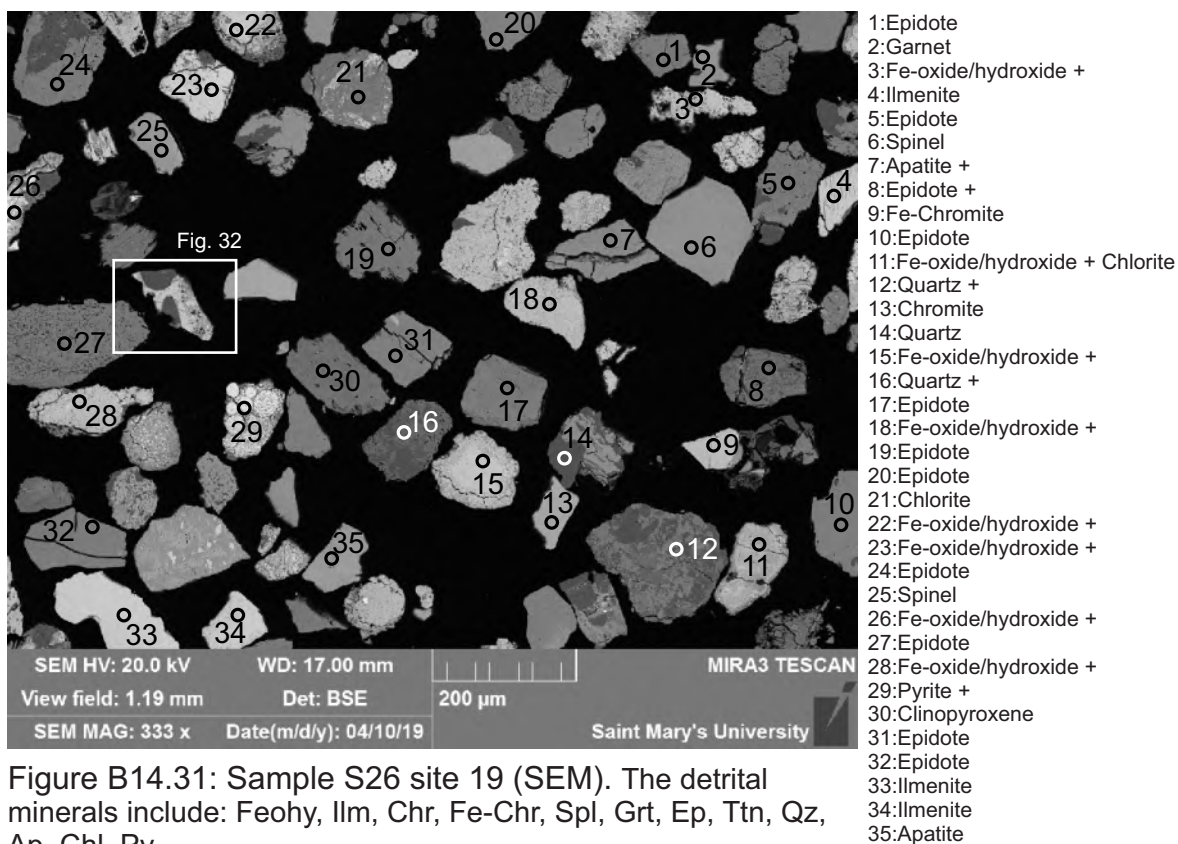

Figure B14.31: Sample S26 site 19 (SEM). The detrital minerals include: Feohy, Ilm, Chr, Fe-Chr, Spl, Grt, Ep, Ttn, Qz, Ap, Chl, Py.



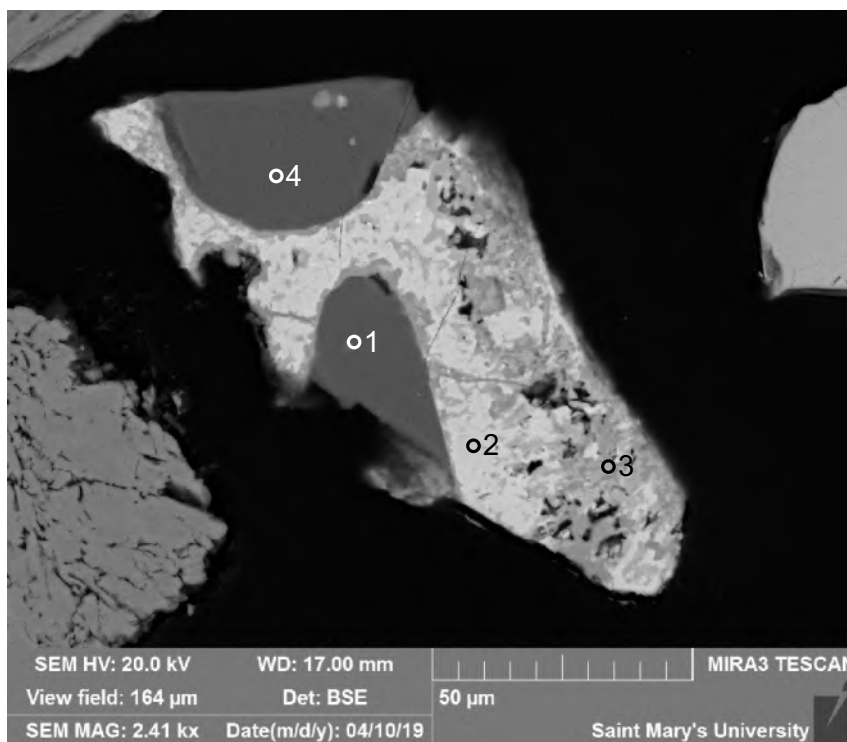

- 1:Quartz
- 2:Ilmenite
- 3:"Titanite"
- 4:Quartz

Figure B14.32: Sample S26 site 19.1 (SEM). Detrital ilmenite grain with quartz and partly altered to titanite. Metamorphic.

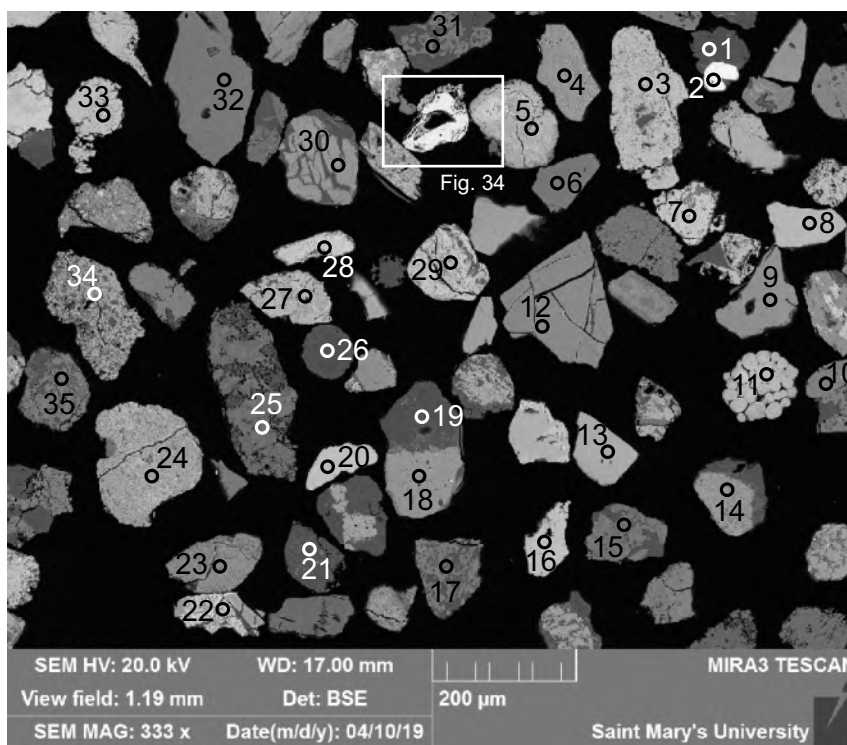

- 1:Quartz
- 2:Zircon
- 3:Fe-oxide/hydroxide +
- 4:"Titanite"
- 5:Fe-oxide/hydroxide +
- 6:Epidote
- 7:Ilmenite
- 8:Chromite
- 9:Garnet
- 10:Epidote +
- 11:Fe-oxide/hydroxide +
- 12:Apatite +
- 13:Chromite
- 14:TiO<sub>2</sub> +
- 15:Epidote
- 16:Fe-oxide/hydroxide +
- 17:Quartz +
- 18:Garnet
- 19:Albite
- 20:Fe-oxide/hydroxide +
- 21:Quartz +
- 22:Chromite +
- 23:Titanite
- 24:"Ilmenite"
- 25:Epidote
- 26:Quartz
- 27:Fe-oxide/hydroxide + Quartz
- 28:Fe-oxide/hydroxide +
- 29:Fe-oxide/hydroxide +
- 30:TiO<sub>2</sub> + Quartz
- 31:Mix
- 32:Clinopyroxene
- 33:Fe-oxide/hydroxide + Quartz +
- 34:Mix
- 35:Epidote +

Figure B14.33: Sample S26 site 20 (SEM). The detrital minerals include: Feohy, Ilm, TiO<sub>2</sub>, Chr, Grt, Ep, Ttn, Zrn, Cpx, Ab, Qz, Ap.

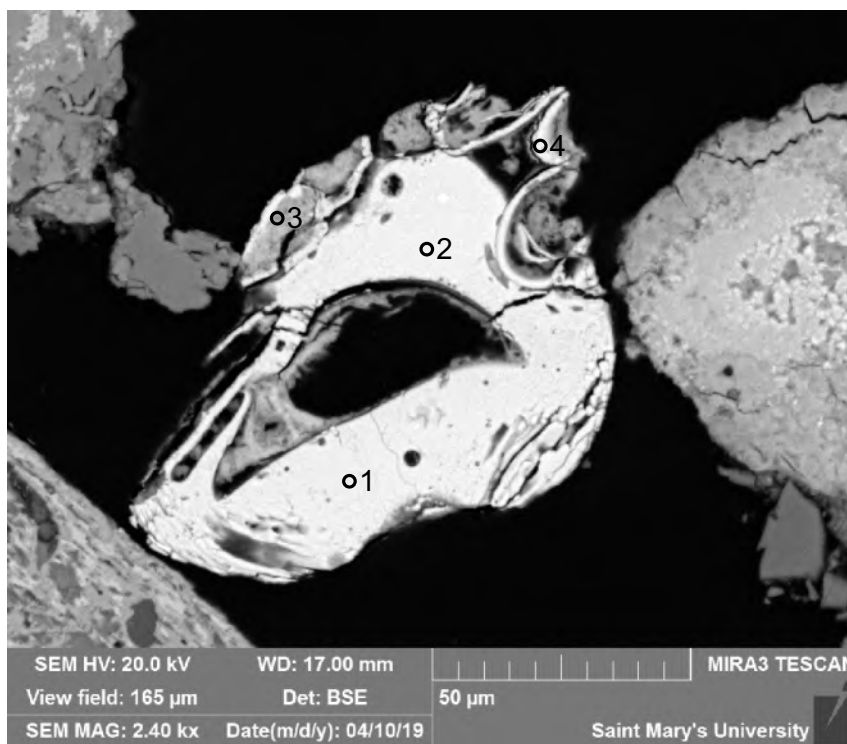

- 1:Magnetite
- 2:Magnetite
- 3:Fe-oxide/hydroxide
- 4:Magnetite

Figure B14.34: Sample S26 site 20.1 (SEM). Detrital magnetite pedogenically altered.

Table B14.1: Mineral chemical analyses of sample S26.

| Sample | Site | Position | Mineral       | SiO2   | TiO2  | Al2O3 | FeO   | MnO  | MgO   | CaO   | Na2O  | K2O  | P2O5  | SO3   | F    | Cl | V2O5 | Cr2O3 | NiO  | CuO  | ZnO  | As2O3 | ZrO2 | Nb2O5 | SnO2 | HfO2 | WO3   | PbO | Total | Actual Total |
|--------|------|----------|---------------|--------|-------|-------|-------|------|-------|-------|-------|------|-------|-------|------|----|------|-------|------|------|------|-------|------|-------|------|------|-------|-----|-------|--------------|
| S26    | 1    | 1        | Ep            | 40.32  |       | 25.40 | 9.02  |      |       | 22.25 |       |      |       |       |      |    |      |       |      |      |      |       |      |       |      |      |       | 97  | 111   |              |
| S26    | 1    | 2        | Feohy         | 1.09   |       |       | 92.49 | 0.52 | 0.71  |       | 0.81  |      | 1.27  |       |      |    |      |       |      |      |      |       |      |       |      |      | 3.11  | 100 | 85    |              |
| S26    | 1    | 3        | Feohy         | 2.43   |       | 1.34  | 91.18 |      |       |       |       |      | 1.30  |       |      |    |      |       |      |      |      |       |      |       |      |      | 3.75  | 100 | 89    |              |
| S26    | 1    | 4        | Amph          | 52.37  | 1.39  | 4.85  | 8.95  |      | 15.82 | 12.59 | 0.73  |      |       |       |      |    |      | 0.30  |      |      |      |       |      |       |      |      |       | 97  | 118   |              |
| S26    | 1    | 5        | Feohy +       | 4.46   |       | 1.06  | 93.71 |      | 0.76  |       |       |      |       |       |      |    |      |       |      |      |      |       |      |       |      |      |       | 100 | 80    |              |
| S26    | 1    | 6        | Amph          | 48.01  | 2.09  | 7.98  | 11.04 |      | 15.27 | 10.51 | 2.10  |      |       |       |      |    |      |       |      |      |      |       |      |       |      |      |       | 97  | 118   |              |
| S26    | 1    | 7        | Feohy + Chl + | 10.47  | 1.46  | 6.06  | 71.04 | 0.81 | 0.81  | 0.41  |       |      | 1.93  |       |      |    |      |       |      |      | 0.48 |       |      |       |      |      | 6.52  | 100 | 65    |              |
| S26    | 1    | 8        | TiO2          |        | 95.78 |       | 1.03  |      |       |       |       |      |       |       |      |    |      |       |      |      |      |       |      | 3.19  |      |      |       | 100 | 108   |              |
| S26    | 1    | 9        | Mix           | 84.59  | 10.64 | 3.49  | 0.41  |      |       |       |       | 0.87 |       |       |      |    |      |       |      |      |      |       |      |       |      |      |       | 100 | 117   |              |
| S26    | 1    | 10       | TiO2          |        | 99.46 |       |       |      |       |       |       |      |       |       |      |    |      | 0.54  |      |      |      |       |      |       |      |      |       | 100 | 106   |              |
| S26    | 1    | 11       | Cpx           | 44.38  | 0.49  | 22.47 | 7.28  |      | 3.14  | 19.86 | 0.58  | 1.81 |       |       |      |    |      |       |      |      |      |       |      |       |      |      |       | 100 | 91    |              |
| S26    | 1    | 12       | Feohy +       | 17.01  |       | 4.54  | 73.96 |      |       |       |       | 0.33 | 1.25  |       |      |    | 0.66 |       |      | 0.72 | 1.53 |       |      |       |      |      |       | 100 | 84    |              |
| S26    | 1    | 13       | Feohy +       | 12.83  |       | 4.71  | 81.24 |      | 0.71  |       |       | 0.52 |       |       |      |    |      |       |      |      |      |       |      |       |      |      |       | 100 | 82    |              |
| S26    | 1    | 14       | Feohy +       | 5.17   | 0.61  | 2.49  | 91.73 |      |       |       |       |      |       |       |      |    |      |       |      |      |      |       |      |       |      |      |       | 100 | 74    |              |
| S26    | 1    | 15       | Feohy +       | 8.71   |       | 4.28  | 84.05 |      | 0.77  |       |       |      | 2.19  |       |      |    |      |       |      |      |      |       |      |       |      |      |       | 100 | 78    |              |
| S26    | 1    | 16       | Feohy +       | 1.93   |       |       | 87.85 |      | 0.84  |       |       |      | 1.35  | 1.79  |      |    |      |       |      |      |      |       |      |       |      |      | 6.24  | 100 | 50    |              |
| S26    | 1    | 17       | Spl           |        |       | 51.47 | 12.94 |      | 17.83 |       |       |      |       |       |      |    |      | 17.76 |      |      |      |       |      |       |      |      |       | 100 | 105   |              |
| S26    | 1    | 18       | Feohy +       | 4.70   |       |       | 95.30 |      |       |       |       |      |       |       |      |    |      |       |      |      |      |       |      |       |      |      |       | 100 | 72    |              |
| S26    | 1    | 19       | Feohy +       | 4.93   | 1.98  | 4.67  | 76.51 |      | 0.84  | 0.41  |       |      | 2.08  |       |      |    |      | 0.68  |      |      |      |       |      |       |      |      | 7.89  | 100 | 61    |              |
| S26    | 1    | 20       | Ep            | 40.42  |       | 24.61 | 9.36  | 0.32 |       | 22.29 |       |      |       |       |      |    |      |       |      |      |      |       |      |       |      |      |       | 97  | 102   |              |
| S26    | 1    | 21       | Qz            | 100.00 |       |       |       |      |       |       |       |      |       |       |      |    |      |       |      |      |      |       |      |       |      |      |       | 100 | 113   |              |
| S26    | 1    | 22       | Ilm           |        | 51.85 |       | 45.25 | 0.58 | 2.33  |       |       |      |       |       |      |    |      |       |      |      |      |       |      |       |      |      |       | 100 | 101   |              |
| S26    | 1    | 23       | Ttn           | 33.24  | 36.16 | 2.48  |       |      |       | 28.12 |       |      |       |       |      |    |      |       |      |      |      |       |      |       |      |      |       | 100 | 107   |              |
| S26    | 1    | 24       | Feohy +       | 23.54  |       | 2.75  | 70.96 |      |       |       |       |      | 1.20  |       |      |    | 0.55 |       |      |      | 1.01 |       |      |       |      |      |       | 100 | 84    |              |
| S26    | 1    | 25       | Ep            | 40.84  |       | 23.59 | 10.91 | 0.37 |       | 20.86 | 0.43  |      |       |       |      |    |      |       |      |      |      |       |      |       |      |      |       | 97  | 98    |              |
| S26    | 1    | 26       | Grt           | 39.89  | 1.52  | 8.24  | 18.43 |      |       | 31.93 |       |      |       |       |      |    |      |       |      |      |      |       |      |       |      |      |       | 100 | 108   |              |
| S26    | 1    | 27       | Chr           |        |       | 19.48 | 20.21 |      | 12.13 |       |       |      |       |       |      |    |      | 48.19 |      |      |      |       |      |       |      |      |       | 100 | 105   |              |
| S26    | 1    | 28       | Feohy +       | 4.50   |       | 2.87  | 78.24 |      | 1.05  | 0.45  |       |      | 2.77  |       |      |    |      |       |      |      |      |       |      |       |      |      | 10.12 | 100 | 72    |              |
| S26    | 1    | 29       | Chr           |        |       | 26.29 | 18.98 |      | 12.75 |       |       |      |       |       |      |    |      | 41.97 |      |      |      |       |      |       |      |      |       | 100 | 95    |              |
| S26    | 2    | 1        | Ep            | 39.93  |       | 22.30 | 12.30 |      |       | 22.47 |       |      |       |       |      |    |      |       |      |      |      |       |      |       |      |      |       | 97  | 108   |              |
| S26    | 2    | 2        | Qz            | 99.67  |       |       | 0.33  |      |       |       |       |      |       |       |      |    |      |       |      |      |      |       |      |       |      |      |       | 100 | 121   |              |
| S26    | 2    | 3        | Feohy +       | 3.83   |       | 2.06  | 91.85 |      |       |       |       |      |       |       |      |    |      |       |      |      | 2.26 |       |      |       |      |      |       | 100 | 74    |              |
| S26    | 2    | 4        | Qz +          | 88.60  |       | 4.27  | 2.91  |      | 2.82  | 1.40  |       |      |       |       |      |    |      |       |      |      |      |       |      |       |      |      |       | 100 | 117   |              |
| S26    | 2    | 5        | Ap            |        |       |       |       |      |       | 50.27 |       |      | 45.03 |       | 4.70 |    |      |       |      |      |      |       |      |       |      |      |       | 100 | 121   |              |
| S26    | 2    | 6        | Ep            | 39.98  |       | 23.66 | 10.83 |      |       | 22.54 |       |      |       |       |      |    |      |       |      |      |      |       |      |       |      |      |       | 97  | 110   |              |
| S26    | 2    | 7        | Py            |        |       |       | 33.63 |      |       |       | 0.48  |      |       | 65.89 |      |    |      |       |      |      |      |       |      |       |      |      |       | 100 | 193   |              |
| S26    | 2    | 8        | Feohy +       | 5.96   |       | 1.14  | 92.90 |      |       |       |       |      |       |       |      |    |      |       |      |      |      |       |      |       |      |      |       | 100 | 83    |              |
| S26    | 2    | 9        | Qz            | 100.00 |       |       |       |      |       |       |       |      |       |       |      |    |      |       |      |      |      |       |      |       |      |      |       | 100 | 126   |              |
| S26    | 2    | 10       | Mix           | 26.98  | 24.76 | 15.06 | 25.72 |      | 5.92  |       | 0.86  | 0.70 |       |       |      |    |      |       |      |      |      |       |      |       |      |      |       | 100 | 95    |              |
| S26    | 2    | 11       | Ep            | 39.73  |       | 20.93 | 14.33 |      |       | 22.01 |       |      |       |       |      |    |      |       |      |      |      |       |      |       |      |      |       | 97  | 111   |              |
| S26    | 2    | 12       | Feohy +       | 4.95   |       | 3.49  | 87.35 |      |       |       |       |      | 1.76  |       |      |    | 0.67 |       |      |      | 1.78 |       |      |       |      |      |       | 100 | 81    |              |
| S26    | 2    | 13       | Ep            | 39.79  |       | 21.35 | 13.53 |      |       | 22.34 |       |      |       |       |      |    |      |       |      |      |      |       |      |       |      |      |       | 97  | 112   |              |
| S26    | 2    | 14       | Ep            | 40.09  |       | 31.65 | 0.73  |      |       | 23.11 |       |      |       |       | 1.43 |    |      |       |      |      |      |       |      |       |      |      |       | 97  | 113   |              |
| S26    | 2    | 15       | Feohy +       | 4.44   |       | 2.61  | 90.28 |      | 0.92  | 0.53  |       |      | 1.21  |       |      |    |      |       |      |      |      |       |      |       |      |      |       | 100 | 77    |              |
| S26    | 2    | 16       | Ilm           |        | 51.62 |       | 46.37 | 2.01 |       |       |       |      |       |       |      |    |      |       |      |      |      |       |      |       |      |      |       | 100 | 105   |              |
| S26    | 2    | 17       | Ab            | 67.18  |       | 17.91 |       |      |       |       | 11.67 | 0.25 |       |       | 2.98 |    |      |       |      |      |      |       |      |       |      |      |       | 100 | 118   |              |
| S26    | 2    | 18       | Ep            | 40.31  |       | 27.56 | 6.18  |      |       | 22.95 |       |      |       |       |      |    |      |       |      |      |      |       |      |       |      |      |       | 97  | 111   |              |
| S26    | 2    | 19       | Qz            | 99.64  |       |       | 0.36  |      |       |       |       |      |       |       |      |    |      |       |      |      |      |       |      |       |      |      |       | 100 | 126   |              |
| S26    | 2    | 20       | Chr + Chl +   | 28.31  | 0.43  | 7.10  | 14.31 |      | 27.89 |       | 0.67  |      |       | 1.38  |      |    |      | 19.90 |      |      |      |       |      |       |      |      |       | 100 | 110   |              |
| S26    | 2    | 21       | Chr + Chl     | 30.12  |       | 13.92 | 13.70 |      | 26.07 |       |       |      |       |       |      |    |      | 14.93 | 0.59 |      | 0.67 |       |      |       |      |      |       | 100 | 102   |              |
| S26    | 2    | 22       | Feohy +       | 3.19   |       | 1.67  | 88.93 |      |       | 0.52  |       |      | 1.03  |       |      |    |      |       |      |      | 2.33 |       |      |       |      |      | 2.35  | 100 | 74    |              |
| S26    | 2    | 23       | Ep            | 40.33  |       | 22.90 | 11.31 |      |       | 22.46 |       |      |       |       |      |    |      |       |      |      |      |       |      |       |      |      |       | 97  | 108   |              |
| S26    | 2    | 24       | Grt           | 41.02  |       | 21.92 | 23.65 | 1.40 | 6.99  | 5.01  |       |      |       |       |      |    |      |       |      |      |      |       |      |       |      |      |       | 100 | 115   |              |
| S26    | 2    | 25       | Qz + Feohy    | 85.71  |       |       | 14.29 |      |       |       |       |      |       |       |      |    |      |       |      |      |      |       |      |       |      |      |       | 100 | 114   |              |
| S26    | 2    | 26       | Feohy +       | 2.90   |       | 3.01  | 86.32 |      | 1.25  |       |       |      | 1.54  |       |      |    |      |       |      |      |      |       |      |       |      |      | 4.99  | 100 | 64    |              |

Table B14.1: Mineral chemical analyses of sample S26.

| Sample | Site | Position | Mineral    | SiO2   | TiO2   | Al2O3 | FeO   | MnO   | MgO   | CaO   | Na2O | K2O  | P2O5  | SO3  | F    | Cl | V2O5 | Cr2O3 | NiO | CuO | ZnO  | As2O3 | ZrO2 | Nb2O5 | SnO2 | HfO2 | WO3  | PbO | Total | Actual Total |
|--------|------|----------|------------|--------|--------|-------|-------|-------|-------|-------|------|------|-------|------|------|----|------|-------|-----|-----|------|-------|------|-------|------|------|------|-----|-------|--------------|
| S26    | 2    | 27       | Qz + Feohy | 53.64  |        |       | 45.48 |       |       |       |      |      |       |      |      |    |      |       |     |     | 0.88 |       |      |       |      |      |      |     | 100   | 89           |
| S26    | 2    | 28       | Ttn        | 33.73  | 32.73  | 2.85  | 3.75  |       | 1.42  | 25.51 |      |      |       |      |      |    |      |       |     |     |      |       |      |       |      |      |      |     | 100   | 103          |
| S26    | 2    | 29       | Feohy +    | 3.98   |        |       | 95.19 |       |       | 0.36  |      |      |       |      |      |    | 0.47 |       |     |     |      |       |      |       |      |      |      |     | 100   | 78           |
| S26    | 2    | 30       | Ep         | 39.94  |        | 23.19 | 11.82 |       |       | 22.06 |      |      |       |      |      |    |      |       |     |     |      |       |      |       |      |      |      |     | 97    | 105          |
| S26    | 2    | 31       | Ep         | 40.03  |        | 22.96 | 11.74 |       |       | 22.27 |      |      |       |      |      |    |      |       |     |     |      |       |      |       |      |      |      |     | 97    | 105          |
| S26    | 2    | 32       | Amph       | 55.19  |        | 2.65  | 10.43 |       | 16.68 | 11.45 | 0.60 |      |       |      |      |    |      |       |     |     |      |       |      |       |      |      |      |     | 97    | 105          |
| S26    | 2    | 33       | Feohy +    | 4.17   |        | 1.02  | 93.88 |       |       |       |      |      | 0.92  |      |      |    |      |       |     |     |      |       |      |       |      |      |      |     | 100   | 75           |
| S26    | 2    | 34       | Grt        | 39.48  |        | 20.58 | 17.86 | 15.82 | 0.49  | 5.78  |      |      |       |      |      |    |      |       |     |     |      |       |      |       |      |      |      |     | 100   | 105          |
| S26    | 2    | 35       | Qz + Ep    | 71.33  |        | 11.42 | 4.89  |       |       | 12.36 |      |      |       |      |      |    |      |       |     |     |      |       |      |       |      |      |      |     | 100   | 107          |
| S26    | 2    | 36       | Feohy +    | 4.67   |        |       | 95.33 |       |       |       |      |      |       |      |      |    |      |       |     |     |      |       |      |       |      |      |      |     | 100   | 73           |
| S26    | 2    | 37       | Amph       | 56.62  |        | 1.88  | 8.77  |       | 18.36 | 11.37 |      |      |       |      |      |    |      |       |     |     |      |       |      |       |      |      |      |     | 97    | 108          |
| S26    | 2    | 38       | TiO2       |        | 100.00 |       |       |       |       |       |      |      |       |      |      |    |      |       |     |     |      |       |      |       |      |      |      |     | 100   | 105          |
| S26    | 2    | 39       | Cpx        | 49.36  | 0.76   | 3.73  | 3.04  |       | 12.51 | 21.49 | 0.75 |      |       |      |      |    |      | 1.09  |     |     |      |       |      |       |      |      |      |     | 100   | 76           |
| S26    | 2    | 40       | Grt        | 39.01  |        | 4.64  | 21.92 |       | 3.07  | 31.36 |      |      |       |      |      |    |      |       |     |     |      |       |      |       |      |      |      |     | 100   | 98           |
| S26    | 2    | 41       | Ttn        | 33.50  | 38.13  |       | 0.55  |       |       | 27.82 |      |      |       |      |      |    |      |       |     |     |      |       |      |       |      |      |      |     | 100   | 110          |
| S26    | 2    | 42       | Grt        | 41.41  |        | 21.86 | 1.07  |       |       | 34.91 |      |      |       |      | 0.75 |    |      |       |     |     |      |       |      |       |      |      |      |     | 100   | 110          |
| S26    | 2    | 43       | Chr        | 1.41   | 0.47   | 20.57 | 29.13 |       | 8.43  |       |      |      |       |      |      |    | 0.47 | 39.52 |     |     |      |       |      |       |      |      |      |     | 100   | 103          |
| S26    | 2    | 44       | TiO2 +     | 5.49   | 85.53  | 3.01  | 4.00  |       | 1.97  |       |      |      |       |      |      |    |      |       |     |     |      |       |      |       |      |      |      |     | 100   | 104          |
| S26    | 2.1  | 1        | Ab +       | 61.73  |        | 22.89 | 1.81  |       | 0.79  | 1.45  | 8.07 | 2.39 |       | 0.86 |      |    |      |       |     |     |      |       |      |       |      |      |      |     | 100   | 118          |
| S26    | 2.1  | 2        | Ilm +      | 1.11   | 50.33  |       | 42.05 | 5.68  |       | 0.82  |      |      |       |      |      |    |      |       |     |     |      |       |      |       |      |      |      |     | 100   | 106          |
| S26    | 2.1  | 3        | Ttn        | 33.34  | 34.33  | 2.14  | 2.22  |       | 0.73  | 27.23 |      |      |       |      |      |    |      |       |     |     |      |       |      |       |      |      |      |     | 100   | 111          |
| S26    | 2.1  | 4        | TiO2       |        | 96.85  |       | 2.28  |       |       | 0.87  |      |      |       |      |      |    |      |       |     |     |      |       |      |       |      |      |      |     | 100   | 109          |
| S26    | 2.1  | 5        | Grt        | 40.13  |        | 20.87 | 31.45 | 0.78  | 3.57  | 3.21  |      |      |       |      |      |    |      |       |     |     |      |       |      |       |      |      |      |     | 100   | 114          |
| S26    | 2.1  | 6        | Feohy +    | 1.87   |        | 2.39  | 88.87 |       | 1.02  | 0.50  |      |      | 1.25  |      |      |    |      |       |     |     |      |       |      |       |      |      | 4.10 |     | 100   | 70           |
| S26    | 2.1  | 7        | Feohy +    | 1.53   |        | 2.06  | 89.54 |       | 0.87  |       |      |      | 1.35  |      |      |    |      |       |     |     |      |       |      |       |      |      | 4.65 |     | 100   | 70           |
| S26    | 2.1  | 8        | Qz         | 99.57  |        |       | 0.43  |       |       |       |      |      |       |      |      |    |      |       |     |     |      |       |      |       |      |      |      |     | 100   | 118          |
| S26    | 2.1  | 9        | Feohy +    | 9.84   |        | 2.35  | 83.36 |       |       | 0.46  |      |      | 1.08  |      |      |    | 0.72 |       |     |     | 2.19 |       |      |       |      |      |      |     | 100   | 79           |
| S26    | 2.1  | 10       | Feohy +    | 4.37   |        | 2.35  | 91.04 |       |       |       |      |      |       |      |      |    |      |       |     |     |      |       |      |       |      |      | 2.23 |     | 100   | 78           |
| S26    | 2.1  | 11       | Ttn + Chl  | 28.21  | 30.13  | 6.19  | 14.69 | 1.08  | 4.52  | 15.19 |      |      |       |      |      |    |      |       |     |     |      |       |      |       |      |      |      |     | 100   | 105          |
| S26    | 3    | 1        | Spl        |        |        | 45.94 | 14.58 |       | 17.13 |       |      |      |       |      |      |    |      | 22.34 |     |     |      |       |      |       |      |      |      |     | 100   | 109          |
| S26    | 3    | 2        | TiO2       | 0.73   | 98.27  |       | 0.72  |       |       | 0.27  |      |      |       |      |      |    |      |       |     |     |      |       |      |       |      |      |      |     | 100   | 108          |
| S26    | 3    | 3        | Chl        | 28.98  |        | 20.29 | 15.76 |       | 19.60 |       | 0.37 |      |       |      |      |    |      |       |     |     |      |       |      |       |      |      |      |     | 85    | 98           |
| S26    | 3    | 4        | Ep         | 41.44  |        | 28.11 | 2.12  | 0.31  | 2.25  | 22.77 |      |      |       |      |      |    |      |       |     |     |      |       |      |       |      |      |      |     | 97    | 107          |
| S26    | 3    | 5        | Chr        |        |        | 18.25 | 16.12 |       | 10.26 |       |      |      |       |      |      |    |      | 55.38 |     |     |      |       |      |       |      |      |      |     | 100   | 110          |
| S26    | 3    | 6        | Ep         | 39.89  |        | 21.00 | 13.68 |       |       | 22.44 |      |      |       |      |      |    |      |       |     |     |      |       |      |       |      |      |      |     | 97    | 111          |
| S26    | 3    | 7        | Ttn        | 32.73  | 37.47  | 1.10  | 1.05  |       |       | 27.65 |      |      |       |      |      |    |      |       |     |     |      |       |      |       |      |      |      |     | 100   | 114          |
| S26    | 3    | 8        | Chr        |        |        | 12.63 | 23.44 |       | 9.99  |       |      |      |       |      |      |    |      | 53.95 |     |     |      |       |      |       |      |      |      |     | 100   | 112          |
| S26    | 3    | 9        | Ms +       | 56.86  |        | 21.18 | 7.49  |       | 3.64  | 3.96  | 1.94 | 4.33 |       | 0.59 |      |    |      |       |     |     |      |       |      |       |      |      |      |     | 100   | 97           |
| S26    | 3    | 10       | Feohy +    | 3.24   |        |       | 95.20 |       |       | 0.36  |      |      | 1.21  |      |      |    |      |       |     |     |      |       |      |       |      |      |      |     | 100   | 88           |
| S26    | 3    | 11       | Amph       | 46.95  | 1.30   | 8.45  | 14.59 | 0.33  | 11.72 | 11.42 | 1.26 | 0.99 |       |      |      |    |      |       |     |     |      |       |      |       |      |      |      |     | 97    | 117          |
| S26    | 3    | 12       | Qz         | 100.00 |        |       |       |       |       |       |      |      |       |      |      |    |      |       |     |     |      |       |      |       |      |      |      |     | 100   | 124          |
| S26    | 3    | 13       | Ep         | 40.31  |        | 24.98 | 9.27  |       |       | 22.44 |      |      |       |      |      |    |      |       |     |     |      |       |      |       |      |      |      |     | 97    | 113          |
| S26    | 3    | 14       | Feohy +    | 6.33   |        | 3.11  | 88.81 |       |       | 0.41  |      |      | 1.34  |      |      |    |      |       |     |     |      |       |      |       |      |      |      |     | 100   | 77           |
| S26    | 3    | 15       | Grt        | 41.98  |        | 20.06 | 3.58  |       |       | 34.38 |      |      |       |      |      |    |      |       |     |     |      |       |      |       |      |      |      |     | 100   | 111          |
| S26    | 3    | 16       | Ap +       |        |        |       | 0.61  |       |       | 46.28 | 1.15 |      | 38.33 | 1.24 | 9.15 |    |      |       |     |     |      |       |      |       |      |      | 3.25 |     | 100   | 97           |
| S26    | 3    | 17       | Feohy +    | 4.41   |        | 0.98  | 93.64 |       |       |       |      |      | 0.97  |      |      |    |      |       |     |     |      |       |      |       |      |      |      |     | 100   | 75           |
| S26    | 3    | 18       | Feohy +    | 3.71   |        | 3.44  | 79.72 |       | 1.00  | 0.56  |      |      | 2.70  |      |      |    |      |       |     |     |      |       |      |       |      |      | 8.86 |     | 100   | 70           |
| S26    | 3    | 19       | Feohy +    | 2.80   | 0.64   | 2.53  | 87.24 | 1.17  | 0.55  | 0.41  | 0.52 |      | 1.50  |      |      |    |      |       |     |     |      |       |      |       |      |      | 2.65 |     | 100   | 58           |
| S26    | 3    | 20       | Feohy +    | 25.49  | 0.80   | 13.61 | 52.66 |       | 1.00  | 0.33  |      | 1.18 | 1.45  |      |      |    |      |       |     |     |      |       |      |       |      |      | 3.48 |     | 100   | 75           |
| S26    | 3    | 21       | Ep         | 40.43  |        | 23.81 | 10.53 |       |       | 22.23 |      |      |       |      |      |    |      |       |     |     |      |       |      |       |      |      |      |     | 97    | 104          |
| S26    | 3    | 22       | Feohy +    | 4.53   |        | 5.37  | 81.32 |       | 1.18  |       | 0.90 |      | 2.54  |      |      |    | 0.57 |       |     |     |      |       |      |       |      |      | 3.59 |     | 100   | 72           |
| S26    | 3    | 23       | Feohy +    | 4.42   |        |       | 94.22 | 1.36  |       |       |      |      |       |      |      |    |      |       |     |     |      |       |      |       |      |      |      |     | 100   | 73           |
| S26    | 3    | 24       | "Ilm"      |        | 72.17  | 0.58  | 25.22 | 2.02  |       |       |      |      |       |      |      |    |      |       |     |     |      |       |      |       |      |      |      |     | 100   | 92           |
| S26    | 3    | 25       | Amph (Tr)  | 58.54  |        |       | 7.80  |       | 19.25 | 11.41 |      |      |       |      |      |    |      |       |     |     |      |       |      |       |      |      |      |     | 97    | 105          |
| S26    | 3    | 26       | Spl        |        |        | 40.49 | 16.39 |       | 15.54 |       |      |      |       |      |      |    |      | 27.59 |     |     |      |       |      |       |      |      |      |     | 100   | 101          |

Table B14.1: Mineral chemical analyses of sample S26.

| Sample | Site | Position | Mineral               | SiO2   | TiO2  | Al2O3 | FeO    | MnO  | MgO   | CaO   | Na2O | K2O  | P2O5  | SO3   | F    | Cl   | V2O5 | Cr2O3 | NiO  | CuO | ZnO | As2O3 | ZrO2 | Nb2O5 | SnO2 | HfO2 | WO3  | PbO | Total | Actual Total |
|--------|------|----------|-----------------------|--------|-------|-------|--------|------|-------|-------|------|------|-------|-------|------|------|------|-------|------|-----|-----|-------|------|-------|------|------|------|-----|-------|--------------|
| S26    | 3    | 27       | Feohy +               | 4.31   |       | 3.81  | 83.89  |      | 0.77  |       | 0.76 |      | 2.43  |       |      |      |      |       |      |     |     |       |      |       |      |      | 4.02 |     | 100   | 72           |
| S26    | 3    | 28       | Ap                    |        |       |       | 0.56   |      |       | 50.09 |      |      | 45.42 |       | 3.36 | 0.56 |      |       |      |     |     |       |      |       |      |      |      |     | 100   | 113          |
| S26    | 3    | 29       | Feohy +               | 4.14   |       |       | 94.30  |      | 1.11  | 0.44  |      |      |       |       |      |      |      |       |      |     |     |       |      |       |      |      |      |     | 100   | 79           |
| S26    | 3    | 30       | Ep                    | 39.22  |       | 19.87 | 9.93   | 7.20 |       | 20.78 |      |      |       |       |      |      |      |       |      |     |     |       |      |       |      |      |      |     | 97    | 110          |
| S26    | 3    | 31       | Feohy                 |        |       | 0.67  | 92.04  |      | 0.95  | 0.48  | 0.65 |      | 1.20  |       |      |      |      |       |      |     |     |       |      |       |      |      | 4.00 |     | 100   | 79           |
| S26    | 3    | 32       | Ep                    | 41.24  |       | 31.81 | 0.91   |      |       | 23.04 |      |      |       |       |      |      |      |       |      |     |     |       |      |       |      |      |      |     | 97    | 111          |
| S26    | 3    | 33       | Spl                   |        |       | 52.07 | 12.21  |      | 19.86 |       |      |      |       |       |      |      |      | 15.87 |      |     |     |       |      |       |      |      |      |     | 100   | 111          |
| S26    | 3    | 34       | "Chr" +               | 33.21  | 0.71  | 13.61 | 45.82  |      | 2.15  | 0.40  | 1.34 | 2.29 |       |       |      |      |      |       | 0.47 |     |     |       |      |       |      |      |      |     | 100   | 95           |
| S26    | 3    | 35       | Feohy + Qz            | 37.12  |       | 0.71  | 62.17  |      |       |       |      |      |       |       |      |      |      |       |      |     |     |       |      |       |      |      |      |     | 100   | 91           |
| S26    | 3    | 36       | Ep                    | 40.78  |       | 24.08 | 8.09   |      | 1.74  | 22.32 |      |      |       |       |      |      |      |       |      |     |     |       |      |       |      |      |      |     | 97    | 105          |
| S26    | 3    | 37       | Ep                    | 39.44  |       | 17.98 | 17.62  |      |       | 21.96 |      |      |       |       |      |      |      |       |      |     |     |       |      |       |      |      |      |     | 97    | 107          |
| S26    | 3    | 38       | Chr +                 | 1.68   | 1.22  | 4.17  | 34.10  |      | 1.42  |       | 0.64 |      |       | 1.60  |      |      | 0.61 | 54.56 |      |     |     |       |      |       |      |      |      |     | 100   | 97           |
| S26    | 3    | 39       | Grt +                 | 40.96  |       | 20.94 | 23.32  | 0.66 | 7.58  | 6.54  |      |      |       |       |      |      |      |       |      |     |     |       |      |       |      |      |      |     | 100   | 112          |
| S26    | 3.1  | 1        | Feohy +               | 6.39   |       | 1.85  | 90.91  |      |       |       |      |      | 0.85  |       |      |      |      |       |      |     |     |       |      |       |      |      |      |     | 100   | 78           |
| S26    | 3.1  | 2        | Feohy +               | 6.03   |       | 2.95  | 85.27  |      | 0.76  | 0.56  |      |      | 0.99  |       |      |      |      | 0.46  |      |     |     |       |      |       |      |      | 2.97 |     | 100   | 73           |
| S26    | 3.1  | 3        | Chl                   | 28.93  |       | 19.58 | 16.17  |      | 19.56 |       | 0.44 |      |       |       |      |      |      | 0.32  |      |     |     |       |      |       |      |      |      |     | 85    | 97           |
| S26    | 3.1  | 4        | TiO <sub>2</sub> +    | 2.47   | 95.23 | 1.03  | 0.53   |      |       | 0.36  |      | 0.37 |       |       |      |      |      |       |      |     |     |       |      |       |      |      |      |     | 100   | 107          |
| S26    | 3.1  | 5        | Spl                   |        |       | 45.89 | 14.40  |      | 17.30 |       |      |      |       |       |      |      |      | 22.41 |      |     |     |       |      |       |      |      |      |     | 100   | 109          |
| S26    | 4    | 1        | Feohy +               | 4.14   |       | 0.86  | 94.99  |      |       |       |      |      |       |       |      |      |      |       |      |     |     |       |      |       |      |      |      |     | 100   | 76           |
| S26    | 4    | 2        | Feohy +               | 4.11   |       | 1.28  | 94.20  |      |       | 0.41  |      |      |       |       |      |      |      |       |      |     |     |       |      |       |      |      |      |     | 100   | 78           |
| S26    | 4    | 3        | Ttn                   | 30.23  | 36.74 | 0.73  | 5.10   |      |       | 25.93 |      |      |       |       | 0.76 |      |      | 0.51  |      |     |     |       |      |       |      |      |      |     | 100   | 105          |
| S26    | 4    | 4        | Py                    |        |       |       | 30.30  |      |       |       |      |      |       | 69.70 |      |      |      |       |      |     |     |       |      |       |      |      |      |     | 100   | 212          |
| S26    | 4    | 5        | Qz + TiO <sub>2</sub> | 64.01  | 34.86 |       | 1.14   |      |       |       |      |      |       |       |      |      |      |       |      |     |     |       |      |       |      |      |      |     | 100   | 115          |
| S26    | 4    | 6        | Feohy + Chl           | 16.23  |       | 5.85  | 71.87  |      | 4.72  |       |      | 1.33 |       |       |      |      |      |       |      |     |     |       |      |       |      |      |      |     | 100   | 84           |
| S26    | 4    | 7        | Kln +                 | 44.13  | 0.82  | 37.86 | 6.86   |      | 7.32  | 0.46  | 2.57 |      |       |       |      |      |      |       |      |     |     |       |      |       |      |      |      |     | 100   | 98           |
| S26    | 4    | 8        | Feohy +               | 6.88   |       | 0.82  | 91.86  |      |       | 0.44  |      |      |       |       |      |      |      |       |      |     |     |       |      |       |      |      |      |     | 100   | 78           |
| S26    | 4    | 9        | Srp                   | 45.31  |       |       | 4.37   |      | 36.99 |       |      |      |       |       |      |      |      | 0.33  |      |     |     |       |      |       |      |      |      |     | 87    | 97           |
| S26    | 4    | 10       | Feohy +               | 9.31   |       |       | 82.10  |      | 8.59  |       |      |      |       |       |      |      |      |       |      |     |     |       |      |       |      |      |      |     | 100   | 89           |
| S26    | 4    | 11       | Feohy +               | 3.98   |       | 1.94  | 86.73  | 0.63 | 0.77  |       |      |      | 1.08  | 1.20  |      |      |      |       |      |     |     |       |      |       |      |      | 3.66 |     | 100   | 79           |
| S26    | 4    | 12       | Pl (Adas) +           | 57.63  |       | 19.34 | 5.32   |      | 9.56  | 8.15  |      |      |       |       |      |      |      |       |      |     |     |       |      |       |      |      |      |     | 100   | 110          |
| S26    | 4    | 13       | Feohy +               | 7.40   |       | 2.70  | 88.71  |      | 0.76  | 0.43  |      |      |       |       |      |      |      |       |      |     |     |       |      |       |      |      |      |     | 100   | 74           |
| S26    | 4    | 14       | TiO <sub>2</sub> +    | 3.24   | 93.92 |       |        |      |       | 2.84  |      |      |       |       |      |      |      |       |      |     |     |       |      |       |      |      |      |     | 100   | 104          |
| S26    | 4    | 15       | Ilm                   |        | 49.20 |       | 47.34  | 3.45 |       |       |      |      |       |       |      |      |      |       |      |     |     |       |      |       |      |      |      |     | 100   | 97           |
| S26    | 4    | 16       | Ep                    | 40.19  |       | 22.80 | 11.93  |      |       | 22.08 |      |      |       |       |      |      |      |       |      |     |     |       |      |       |      |      |      |     | 97    | 103          |
| S26    | 4    | 17       | Qz                    | 100.00 |       |       |        |      |       |       |      |      |       |       |      |      |      |       |      |     |     |       |      |       |      |      |      |     | 100   | 111          |
| S26    | 4    | 18       | Feohy + Chl +         | 26.08  | 1.01  | 10.71 | 49.75  | 1.74 | 1.40  | 0.35  | 0.83 | 0.39 | 1.94  |       |      |      |      | 0.63  |      |     |     |       |      |       |      |      | 5.16 |     | 100   | 79           |
| S26    | 4    | 19       | Feohy                 |        |       |       | 100.00 |      |       |       |      |      |       |       |      |      |      |       |      |     |     |       |      |       |      |      |      |     | 100   | 88           |
| S26    | 4    | 20       | TiO <sub>2</sub> +    | 7.64   | 83.78 | 3.27  | 3.07   |      | 1.18  |       |      | 1.06 |       |       |      |      |      |       |      |     |     |       |      |       |      |      |      |     | 100   | 96           |
| S26    | 4    | 21       | Feohy +               | 4.41   |       |       | 94.68  |      | 0.91  |       |      |      |       |       |      |      |      |       |      |     |     |       |      |       |      |      |      |     | 100   | 78           |
| S26    | 4    | 22       | Qz                    | 98.94  |       | 0.73  |        |      |       |       | 0.33 |      |       |       |      |      |      |       |      |     |     |       |      |       |      |      |      |     | 100   | 82           |
| S26    | 4    | 23       | Tur                   | 38.36  | 0.71  | 30.38 | 8.69   |      | 6.08  | 0.38  | 2.39 |      |       |       |      |      |      |       |      |     |     |       |      |       |      |      |      | 87  | 96    |              |
| S26    | 4    | 24       | Qz                    | 100.00 |       |       |        |      |       |       |      |      |       |       |      |      |      |       |      |     |     |       |      |       |      |      |      |     | 100   | 115          |
| S26    | 4    | 25       | Feohy +               | 14.15  |       | 5.83  | 74.30  |      | 1.21  | 0.50  |      | 0.88 | 1.90  | 1.23  |      |      |      |       |      |     |     |       |      |       |      |      |      |     | 100   | 63           |
| S26    | 4    | 26       | Feohy                 |        |       |       | 100.00 |      |       |       |      |      |       |       |      |      |      |       |      |     |     |       |      |       |      |      |      |     | 100   | 79           |
| S26    | 4    | 27       | Ep                    | 40.58  |       | 31.03 | 1.13   |      |       | 22.56 | 0.30 |      |       |       | 1.41 |      |      |       |      |     |     |       |      |       |      |      |      |     | 97    | 110          |
| S26    | 4    | 28       | Feohy + Chl +         | 13.73  |       | 6.56  | 68.17  |      | 2.03  | 0.71  | 1.03 | 0.33 | 1.54  |       |      |      |      |       |      |     |     |       |      |       |      |      | 5.90 |     | 100   | 73           |
| S26    | 4    | 29       | Feohy +               | 4.04   |       |       | 94.65  | 1.31 |       |       |      |      |       |       |      |      |      |       |      |     |     |       |      |       |      |      |      |     | 100   | 80           |
| S26    | 4    | 30       | Ep                    | 40.64  |       | 22.15 | 12.37  |      |       | 21.84 |      |      |       |       |      |      |      |       |      |     |     |       |      |       |      |      |      |     | 97    | 113          |
| S26    | 4    | 31       | Feohy +               | 6.33   |       | 1.89  | 90.25  |      | 1.16  | 0.38  |      |      |       |       |      |      |      |       |      |     |     |       |      |       |      |      |      |     | 100   | 72           |
| S26    | 4    | 32       | Cpx                   | 55.55  |       | 1.79  | 3.69   |      | 17.22 | 21.37 |      |      |       |       |      |      |      | 0.37  |      |     |     |       |      |       |      |      |      |     | 100   | 121          |
| S26    | 4    | 33       | Ep +                  | 46.93  |       | 24.94 | 6.58   |      |       | 18.54 | 3.01 |      |       |       |      |      |      |       |      |     |     |       |      |       |      |      |      |     | 100   | 115          |
| S26    | 4    | 34       | Chl                   | 24.62  |       | 21.12 | 4.85   |      | 26.71 |       |      |      |       |       | 3.28 |      |      | 4.42  |      |     |     |       |      |       |      |      |      |     | 85    | 103          |
| S26    | 5    | 1        | Ep                    | 40.24  | 0.41  | 22.81 | 11.13  |      |       | 22.42 |      |      |       |       |      |      |      |       |      |     |     |       |      |       |      |      |      |     | 97    | 106          |
| S26    | 5    | 2        | Qz + Ttn              | 70.23  | 16.23 | 0.66  | 0.32   |      |       | 12.56 |      |      |       |       |      |      |      |       |      |     |     |       |      |       |      |      |      |     | 100   | 117          |
| S26    | 5    | 3        | Cpx                   | 54.54  | 0.53  | 2.39  | 5.31   |      | 18.28 | 17.92 | 0.39 |      |       |       |      |      |      | 0.65  |      |     |     |       |      |       |      |      |      |     | 100   | 113          |



Table B14.1: Mineral chemical analyses of sample S26.

| Sample | Site | Position | Mineral       | SiO2  | TiO2  | Al2O3 | FeO   | MnO   | MgO   | CaO   | Na2O | K2O   | P2O5  | SO3  | F    | Cl | V2O5 | Cr2O3 | NiO  | CuO   | ZnO   | As2O3 | ZrO2  | Nb2O5 | SnO2 | HfO2 | WO3  | PbO   | Total | Actual Total |
|--------|------|----------|---------------|-------|-------|-------|-------|-------|-------|-------|------|-------|-------|------|------|----|------|-------|------|-------|-------|-------|-------|-------|------|------|------|-------|-------|--------------|
| S26    | 5    | 4        | Feohy +       | 2.68  |       |       | 95.35 | 0.64  |       |       |      |       |       | 1.33 |      |    |      |       |      |       |       |       |       |       |      |      |      |       | 100   | 75           |
| S26    | 5    | 5        | "Ilm" + Chl   | 24.23 | 60.68 | 5.01  | 7.75  |       | 2.33  |       |      |       |       |      |      |    |      |       |      |       |       |       |       |       |      |      |      |       | 100   | 107          |
| S26    | 5    | 6        | Ep            | 40.64 |       | 29.91 | 2.50  |       |       | 23.95 |      |       |       |      |      |    |      |       |      |       |       |       |       |       |      |      |      |       | 97    | 97           |
| S26    | 5    | 7        | Feohy +       | 4.82  |       | 2.60  | 90.43 |       |       | 0.51  |      |       | 1.64  |      |      |    |      |       |      |       |       |       |       |       |      |      |      |       | 100   | 80           |
| S26    | 5    | 8        | Feohy +       | 8.32  |       |       | 90.42 |       |       | 0.43  |      |       | 0.83  |      |      |    |      |       |      |       |       |       |       |       |      |      |      |       | 100   | 81           |
| S26    | 5    | 9        | Qz            | 99.26 |       |       | 0.74  |       |       |       |      |       |       |      |      |    |      |       |      |       |       |       |       |       |      |      |      |       | 100   | 121          |
| S26    | 5    | 10       | Feohy +       | 4.13  |       | 9.01  | 72.80 |       | 1.09  |       | 0.95 |       | 2.46  |      |      |    |      | 0.52  |      |       |       |       |       |       |      |      | 9.04 |       | 100   | 74           |
| S26    | 5    | 11       | Feohy +       | 2.69  |       | 0.95  | 96.36 |       |       |       |      |       |       |      |      |    |      |       |      |       |       |       |       |       |      |      |      |       | 100   | 87           |
| S26    | 5    | 12       | Zrn           | 31.29 |       |       | 0.43  |       |       |       |      |       |       |      |      |    |      |       |      |       |       |       | 68.28 |       |      |      |      |       | 100   | 118          |
| S26    | 5    | 13       | Mix           | 52.84 |       | 19.94 | 6.90  |       | 1.85  | 11.22 | 7.26 |       |       |      |      |    |      |       |      |       |       |       |       |       |      |      |      |       | 100   | 109          |
| S26    | 5    | 14       | Feohy +       | 5.75  |       | 4.85  | 81.89 |       | 1.09  | 0.42  |      |       | 1.24  |      |      |    |      |       |      |       |       |       |       |       |      |      | 4.76 |       | 100   | 76           |
| S26    | 5    | 15       | Ep            | 40.02 |       | 22.28 | 12.01 |       |       | 22.69 |      |       |       |      |      |    |      |       |      |       |       |       |       |       |      |      |      |       | 97    | 106          |
| S26    | 5    | 16       | Feohy + Chl   | 8.94  |       | 5.42  | 77.07 |       | 0.91  | 0.35  |      |       | 2.66  |      |      |    |      |       |      |       |       |       |       |       |      |      | 4.65 |       | 100   | 80           |
| S26    | 5    | 17       | Chr           |       |       | 18.98 | 17.73 |       | 12.45 |       |      |       |       |      |      |    |      | 50.85 |      |       |       |       |       |       |      |      |      |       | 100   | 106          |
| S26    | 5    | 18       | Ap            |       |       |       |       |       |       | 49.74 |      |       | 44.55 |      | 5.71 |    |      |       |      |       |       |       |       |       |      |      |      |       | 100   | 117          |
| S26    | 5    | 19       | Qz + Pb       | 70.14 |       | 0.75  | 0.54  |       |       |       |      |       |       |      |      |    |      |       |      |       |       |       |       |       |      |      |      | 28.57 | 100   | 101          |
| S26    | 5    | 20       | Ilm + Chl     | 22.32 | 41.76 | 13.91 | 13.72 |       | 6.86  |       | 0.95 | 0.49  |       |      |      |    |      |       |      |       |       |       |       |       |      |      |      |       | 100   | 95           |
| S26    | 5    | 21       | Feohy +       | 3.35  |       | 2.25  | 88.64 |       |       |       |      |       |       |      |      |    | 0.80 |       |      |       | 3.38  | 1.59  |       |       |      |      |      |       | 100   | 72           |
| S26    | 5    | 22       | Ep            | 42.68 |       | 24.45 | 5.31  |       | 2.65  | 21.29 | 0.62 |       |       |      |      |    |      |       |      |       |       |       |       |       |      |      |      |       | 97    | 96           |
| S26    | 5    | 23       | Grt           | 39.86 |       | 20.90 | 12.69 | 20.32 | 2.98  | 3.24  |      |       |       |      |      |    |      |       |      |       |       |       |       |       |      |      |      |       | 100   | 102          |
| S26    | 5    | 24       | Feohy +       | 20.52 |       | 4.81  | 71.23 |       | 1.17  | 0.52  | 0.91 |       |       | 0.84 |      |    |      |       |      |       |       |       |       |       |      |      |      |       | 100   | 73           |
| S26    | 5    | 25       | Ep +          | 46.40 |       | 27.62 | 6.11  |       | 0.72  | 18.34 |      | 0.80  |       |      |      |    |      |       |      |       |       |       |       |       |      |      |      |       | 100   | 95           |
| S26    | 5    | 26       | Ap +          | 0.78  |       | 0.43  | 0.43  |       |       | 48.04 | 1.34 |       | 35.91 | 2.62 | 9.00 |    |      |       |      |       |       |       |       |       |      |      | 1.44 |       | 100   | 104          |
| S26    | 5    | 27       | Chr           |       |       | 22.57 | 18.61 |       | 12.33 |       |      |       |       |      |      |    |      | 46.49 |      |       |       |       |       |       |      |      |      |       | 100   | 102          |
| S26    | 5    | 28       | Feohy + Qz    | 48.06 |       | 1.20  | 50.75 |       |       |       |      |       |       |      |      |    |      |       |      |       |       |       |       |       |      |      |      |       | 100   | 88           |
| S26    | 5    | 29       | Ep            | 40.23 |       | 24.51 | 9.81  |       |       | 22.46 |      |       |       |      |      |    |      |       |      |       |       |       |       |       |      |      |      |       | 97    | 105          |
| S26    | 5.1  | 1        | Feohy +       | 4.20  |       | 0.77  | 95.03 |       |       |       |      |       |       |      |      |    |      |       |      |       |       |       |       |       |      |      |      |       | 100   | 83           |
| S26    | 5.1  | 2        | Feohy +       | 3.20  |       | 2.46  | 87.02 |       | 1.33  | 0.49  |      |       | 1.10  |      |      |    |      |       |      |       |       |       |       |       |      |      | 4.41 |       | 100   | 78           |
| S26    | 5.1  | 3        | Kfs           | 59.52 |       | 19.05 | 7.35  |       | 1.91  |       |      | 12.17 |       |      |      |    |      |       |      |       |       |       |       |       |      |      |      |       | 100   | 84           |
| S26    | 6    | 1        | Feohy +       | 3.55  |       | 2.48  | 90.99 |       | 0.86  | 0.72  |      |       | 1.40  |      |      |    |      |       |      |       |       |       |       |       |      |      |      |       | 100   | 79           |
| S26    | 6    | 2        | Ep            | 41.96 |       | 27.52 | 5.32  |       |       | 21.52 | 0.68 |       |       |      |      |    |      |       |      |       |       |       |       |       |      |      |      |       | 97    | 118          |
| S26    | 6    | 3        | Ttn           | 31.99 | 34.57 | 2.31  | 1.55  |       |       | 27.67 |      |       |       |      | 1.91 |    |      |       |      |       |       |       |       |       |      |      |      |       | 100   | 104          |
| S26    | 6    | 4        | Feohy + Qz    | 11.78 |       | 2.20  | 84.24 |       |       |       |      |       | 1.78  |      |      |    |      |       |      |       |       |       |       |       |      |      |      |       | 100   | 93           |
| S26    | 6    | 5        | Ep            | 41.25 | 0.85  | 27.70 | 4.83  |       |       | 22.36 |      |       |       |      |      |    |      |       |      |       |       |       |       |       |      |      |      |       | 97    | 119          |
| S26    | 6    | 6        | Feohy +       | 3.75  |       |       | 96.25 |       |       |       |      |       |       |      |      |    |      |       |      |       |       |       |       |       |      |      |      |       | 100   | 80           |
| S26    | 6    | 7        | Chr           |       | 0.62  | 28.77 | 22.43 |       | 13.82 |       |      |       |       |      |      |    |      | 34.36 |      |       |       |       |       |       |      |      |      |       | 100   | 109          |
| S26    | 6    | 8        | Cu-Zn oxide   |       |       |       | 0.83  |       |       |       |      |       |       |      |      |    |      |       |      | 52.74 | 33.28 |       |       |       |      |      |      | 13.15 | 100   | 136          |
| S26    | 6    | 9        | Feohy +       | 5.68  |       |       | 94.32 |       |       |       |      |       |       |      |      |    |      |       |      |       |       |       |       |       |      |      |      |       | 100   | 79           |
| S26    | 6    | 10       | Ep            | 40.08 |       | 22.75 | 11.94 |       |       | 22.23 |      |       |       |      |      |    |      |       |      |       |       |       |       |       |      |      |      |       | 97    | 109          |
| S26    | 6    | 11       | Feohy +       | 4.54  |       | 5.65  | 76.16 |       | 1.00  | 0.81  |      |       | 2.23  |      |      |    |      | 0.52  |      | 0.73  |       |       |       |       |      |      | 8.36 |       | 100   | 66           |
| S26    | 6    | 12       | Ep            | 40.55 |       | 22.84 | 11.65 |       |       | 21.96 |      |       |       |      |      |    |      |       |      |       |       |       |       |       |      |      |      |       | 97    | 109          |
| S26    | 6    | 13       | Cpx           | 55.46 |       | 1.02  | 4.54  |       | 17.34 | 21.19 |      |       |       |      |      |    |      | 0.44  |      |       |       |       |       |       |      |      |      |       | 100   | 113          |
| S26    | 6    | 14       | Feohy +       | 6.79  |       | 7.23  | 81.80 |       | 1.05  |       |      |       | 1.52  |      |      |    |      |       | 0.69 |       | 0.92  |       |       |       |      |      |      |       | 100   | 79           |
| S26    | 6    | 15       | Cpx           | 54.07 | 0.77  | 1.82  | 7.68  |       | 14.30 | 20.99 | 0.38 |       |       |      |      |    |      |       |      |       |       |       |       |       |      |      |      |       | 100   | 114          |
| S26    | 6    | 16       | Ep            | 41.84 |       | 24.27 | 7.16  |       | 1.73  | 22.01 |      |       |       |      |      |    |      |       |      |       |       |       |       |       |      |      |      |       | 97    | 102          |
| S26    | 6    | 17       | Feohy +       | 4.59  |       | 0.77  | 94.64 |       |       |       |      |       |       |      |      |    |      |       |      |       |       |       |       |       |      |      |      |       | 100   | 86           |
| S26    | 6    | 18       | Feohy +       | 4.26  |       |       | 94.83 |       |       |       |      |       |       |      |      |    |      |       |      | 0.91  |       |       |       |       |      |      |      |       | 100   | 84           |
| S26    | 6    | 19       | Feohy +       | 4.34  |       | 0.75  | 94.91 |       |       |       |      |       |       |      |      |    |      |       |      |       |       |       |       |       |      |      |      |       | 100   | 80           |
| S26    | 6    | 20       | Feohy +       | 4.23  |       |       | 94.97 |       |       | 0.41  |      |       |       |      |      |    |      | 0.39  |      |       |       |       |       |       |      |      |      |       | 100   | 79           |
| S26    | 6    | 21       | Zrn           | 30.94 |       |       |       |       |       |       |      |       |       |      |      |    |      |       |      |       |       |       | 69.06 |       |      |      |      |       | 100   | 121          |
| S26    | 6    | 22       | Ep            | 40.27 |       | 26.13 | 8.31  |       |       | 22.29 |      |       |       |      |      |    |      |       |      |       |       |       |       |       |      |      |      |       | 97    | 113          |
| S26    | 6    | 23       | Feohy +       | 2.30  |       | 2.61  | 90.19 |       |       | 0.43  |      |       | 1.30  |      |      |    |      |       |      |       |       |       |       |       |      |      | 3.17 |       | 100   | 88           |
| S26    | 6    | 24       | Ep            | 46.75 |       | 26.02 | 1.86  |       | 1.01  | 21.36 |      |       |       |      |      |    |      |       |      |       |       |       |       |       |      |      |      |       | 97    | 110          |
| S26    | 6    | 25       | Feohy +       | 1.22  |       | 0.33  | 96.87 |       |       | 0.39  |      | 0.87  |       |      |      |    |      |       |      |       |       |       |       |       |      |      | 0.33 |       | 100   | 46           |
| S26    | 6    | 26       | "Ilm" + Chl + | 24.06 | 52.74 | 9.45  | 6.66  |       | 4.19  | 0.25  | 1.43 | 1.21  |       |      |      |    |      |       |      |       |       |       |       |       |      |      |      |       | 100   | 106          |

Table B14.1: Mineral chemical analyses of sample S26.

| Sample | Site | Position | Mineral       | SiO2   | TiO2  | Al2O3 | FeO   | MnO  | MgO   | CaO   | Na2O | K2O  | P2O5  | SO3   | F    | Cl   | V2O5 | Cr2O3 | NiO | CuO  | ZnO  | As2O3 | ZrO2  | Nb2O5 | SnO2  | HfO2 | WO3   | PbO | Total | Actual Total |
|--------|------|----------|---------------|--------|-------|-------|-------|------|-------|-------|------|------|-------|-------|------|------|------|-------|-----|------|------|-------|-------|-------|-------|------|-------|-----|-------|--------------|
| S26    | 6    | 27       | Ap            |        |       |       |       |      |       | 49.65 |      |      | 45.54 |       | 4.32 | 0.49 |      |       |     |      |      |       |       |       |       |      |       |     | 100   | 130          |
| S26    | 6    | 28       | Feohy +       | 7.48   |       | 3.97  | 85.32 |      | 0.99  | 0.45  |      |      | 1.79  |       |      |      |      |       |     |      |      |       |       |       |       |      |       |     | 100   | 87           |
| S26    | 6    | 29       | Feohy +       | 5.67   |       |       | 93.66 |      | 0.68  |       |      |      |       |       |      |      |      |       |     |      |      |       |       |       |       |      |       |     | 100   | 90           |
| S26    | 6    | 30       | Qz            | 100.00 |       |       |       |      |       |       |      |      |       |       |      |      |      |       |     |      |      |       |       |       |       |      |       |     | 100   | 129          |
| S26    | 6    | 31       | Ap            |        |       |       |       |      |       | 49.96 |      |      | 45.50 |       | 1.41 | 1.65 |      |       |     |      |      |       |       |       |       |      | 1.49  |     | 100   | 125          |
| S26    | 6    | 32       | Ep            | 40.19  |       | 27.02 | 7.23  |      |       | 22.56 |      |      |       |       |      |      |      |       |     |      |      |       |       |       |       |      |       |     | 97    | 101          |
| S26    | 6    | 33       | Chr           |        | 0.36  | 10.79 | 29.97 |      | 4.77  |       |      |      |       |       |      |      | 0.51 | 53.61 |     |      |      |       |       |       |       |      |       |     | 100   | 113          |
| S26    | 7    | 1        | Chr           |        |       | 15.12 | 19.72 |      | 12.26 |       |      |      |       |       |      |      |      | 52.91 |     |      |      |       |       |       |       |      |       |     | 100   | 108          |
| S26    | 7    | 2        | Ep            | 39.69  |       | 22.22 | 12.37 | 0.31 |       | 22.41 |      |      |       |       |      |      |      |       |     |      |      |       |       |       |       |      |       |     | 97    | 110          |
| S26    | 7    | 3        | Feohy +       | 4.72   |       | 9.84  | 74.30 |      | 0.74  |       | 0.92 |      | 2.75  |       |      |      |      | 0.56  |     |      |      |       |       |       |       |      | 6.18  |     | 100   | 81           |
| S26    | 7    | 4        | Ep +          | 42.04  | 0.65  | 21.57 | 6.98  |      | 2.37  | 18.15 |      |      |       |       | 8.24 |      |      |       |     |      |      |       |       |       |       |      |       |     | 100   | 41           |
| S26    | 7    | 5        | Feohy +       | 3.55   |       |       | 93.73 |      |       |       |      |      | 0.96  |       |      |      | 0.77 | 0.99  |     |      |      |       |       |       |       |      |       |     | 100   | 84           |
| S26    | 7    | 6        | Ep            | 40.84  |       | 27.82 | 5.79  |      |       | 22.55 |      |      |       |       |      |      |      |       |     |      |      |       |       |       |       |      |       |     | 97    | 117          |
| S26    | 7    | 7        | St            | 28.07  |       | 43.64 | 25.36 | 0.61 | 2.32  |       |      |      |       |       |      |      |      |       |     |      |      |       |       |       |       |      |       |     | 100   | 109          |
| S26    | 7    | 8        | Feohy + Chl + | 6.67   | 0.52  | 5.03  | 70.38 |      | 2.26  | 0.50  | 0.66 | 0.58 | 2.08  |       |      |      |      | 0.69  |     |      |      |       |       |       |       |      | 10.64 |     | 100   | 83           |
| S26    | 7    | 9        | Cst           |        |       |       | 0.53  |      |       |       |      |      |       |       |      |      |      |       |     |      | 0.67 |       |       |       | 98.80 |      |       |     | 100   | 108          |
| S26    | 7    | 10       | Ep            | 38.14  |       | 19.71 | 4.80  |      | 7.41  | 26.94 |      |      |       |       |      |      |      |       |     |      |      |       |       |       |       |      |       |     | 97    | 115          |
| S26    | 7    | 11       | Amph          | 50.53  |       | 8.39  | 6.38  |      | 18.10 | 11.69 | 1.56 |      |       |       |      | 0.35 |      |       |     |      |      |       |       |       |       |      |       |     | 97    | 120          |
| S26    | 7    | 12       | Feohy +       | 2.72   |       | 1.29  | 91.66 |      |       | 0.43  |      |      |       |       |      |      |      |       |     |      |      |       |       |       |       |      | 3.90  |     | 100   | 91           |
| S26    | 7    | 13       | Ap            |        |       |       | 0.45  | 1.39 |       | 46.97 |      |      | 44.34 |       | 5.64 |      |      |       |     |      |      |       |       |       |       |      | 1.21  |     | 100   | 128          |
| S26    | 7    | 14       | Feohy +       | 3.94   |       | 0.74  | 94.09 | 1.24 |       |       |      |      |       |       |      |      |      |       |     |      |      |       |       |       |       |      |       |     | 100   | 82           |
| S26    | 7    | 15       | Spl           |        |       | 43.53 | 13.90 |      | 17.65 |       |      |      |       |       |      |      |      | 24.92 |     |      |      |       |       |       |       |      |       |     | 100   | 114          |
| S26    | 7    | 16       | TiO2 +        | 5.46   | 93.14 | 0.62  | 0.56  |      |       | 0.23  |      |      |       |       |      |      |      |       |     |      |      |       |       |       |       |      |       |     | 100   | 111          |
| S26    | 7    | 17       | Feohy +       | 5.02   |       | 3.49  | 83.13 |      | 1.13  | 0.54  |      |      | 1.17  |       |      |      |      |       |     |      |      |       |       |       |       |      | 5.50  |     | 100   | 76           |
| S26    | 7    | 18       | Ep            | 39.94  |       | 24.44 | 9.79  |      |       | 22.84 |      |      |       |       |      |      |      |       |     |      |      |       |       |       |       |      |       |     | 97    | 110          |
| S26    | 7    | 19       | Feohy +       | 4.09   |       |       | 92.14 | 2.18 |       | 0.44  |      |      |       |       |      |      |      |       |     |      | 1.15 |       |       |       |       |      |       |     | 100   | 81           |
| S26    | 7    | 20       | Tur           | 36.58  | 0.89  | 31.47 | 10.51 |      | 4.45  | 1.21  | 1.89 |      |       |       |      |      |      |       |     |      |      |       |       |       |       |      |       |     | 87    | 100          |
| S26    | 7    | 21       | Feohy +       | 4.51   |       | 4.12  | 85.47 |      | 1.09  |       |      |      | 1.29  |       |      |      |      | 0.61  |     |      |      |       |       |       |       |      | 2.91  |     | 100   | 78           |
| S26    | 7    | 22       | Feohy +       | 3.02   |       | 2.98  | 83.60 |      | 0.98  | 0.91  |      |      | 1.62  |       |      |      |      |       |     |      |      |       |       |       |       |      | 6.89  |     | 100   | 72           |
| S26    | 7    | 23       | Feohy +       | 4.78   |       | 0.93  | 93.79 |      |       |       |      |      |       |       |      |      |      | 0.50  |     |      |      |       |       |       |       |      |       |     | 100   | 81           |
| S26    | 7    | 24       | Feohy + Chl   | 7.91   |       | 2.11  | 87.54 |      | 0.97  | 0.41  |      |      | 1.06  |       |      |      |      |       |     |      |      |       |       |       |       |      |       |     | 100   | 82           |
| S26    | 7    | 25       | Ep            | 40.12  |       | 23.47 | 10.98 |      |       | 22.43 |      |      |       |       |      |      |      |       |     |      |      |       |       |       |       |      |       |     | 97    | 112          |
| S26    | 7    | 26       | Feohy +       | 3.34   |       | 2.25  | 88.67 |      | 1.32  |       |      |      | 0.99  |       |      |      |      |       |     |      |      |       |       |       |       |      | 3.43  |     | 100   | 76           |
| S26    | 7    | 27       | Chr           |        |       | 10.72 | 19.78 |      | 9.83  |       |      |      |       |       |      |      |      | 59.67 |     |      |      |       |       |       |       |      |       |     | 100   | 107          |
| S26    | 7    | 28       | Ttn           | 32.93  | 36.51 | 1.47  | 1.90  |      |       | 27.20 |      |      |       |       |      |      |      |       |     |      |      |       |       |       |       |      |       |     | 100   | 106          |
| S26    | 7    | 29       | Qz            | 100.00 |       |       |       |      |       |       |      |      |       |       |      |      |      |       |     |      |      |       |       |       |       |      |       |     | 100   | 118          |
| S26    | 7    | 30       | Ep            | 40.51  |       | 24.76 | 5.94  |      | 2.29  | 23.50 |      |      |       |       |      |      |      |       |     |      |      |       |       |       |       |      |       |     | 97    | 97           |
| S26    | 7    | 31       | Py            | 0.77   |       | 0.33  | 42.02 | 0.37 |       |       | 0.67 |      |       | 55.82 |      |      |      |       |     |      |      |       |       |       |       |      |       |     | 100   | 152          |
| S26    | 7    | 32       | Feohy +       | 5.69   |       | 1.29  | 93.02 |      |       |       |      |      |       |       |      |      |      |       |     |      |      |       |       |       |       |      |       |     | 100   | 78           |
| S26    | 7    | 33       | TiO2 +        | 1.75   | 83.36 | 3.07  | 2.84  |      |       | 0.51  | 0.62 |      | 2.14  |       | 4.80 |      |      | 0.90  |     |      |      |       |       |       |       |      |       |     | 100   | 98           |
| S26    | 7    | 34       | Zrn           | 30.55  |       |       |       |      |       |       |      |      |       |       | 1.21 |      |      |       |     |      |      |       | 68.24 |       |       |      |       |     | 100   | 117          |
| S26    | 7    | 35       | Feohy         | 0.82   |       | 0.42  | 96.98 |      |       | 0.45  |      |      | 0.39  |       |      |      |      | 0.94  |     |      |      |       |       |       |       |      |       |     | 100   | 60           |
| S26    | 7    | 36       | Ep            | 40.85  |       | 27.34 | 6.29  | 0.33 |       | 22.18 |      |      |       |       |      |      |      |       |     |      |      |       |       |       |       |      |       |     | 97    | 110          |
| S26    | 7    | 37       | Feohy +       | 4.03   |       | 1.02  | 91.76 |      |       |       |      |      |       |       |      |      |      |       |     |      |      |       |       |       |       |      | 3.19  |     | 100   | 77           |
| S26    | 7    | 38       | Spl           |        |       | 34.88 | 13.28 |      | 16.68 |       |      |      |       |       |      |      |      | 35.16 |     |      |      |       |       |       |       |      |       |     | 100   | 106          |
| S26    | 8    | 1        | Zrn           | 31.24  |       |       |       |      |       |       |      |      |       |       |      |      |      |       |     |      |      |       | 67.37 |       |       | 1.39 |       |     | 100   | 122          |
| S26    | 8    | 2        | Zrn           | 30.87  |       |       |       |      |       |       |      |      |       |       |      |      |      |       |     |      |      |       | 69.13 |       |       |      |       |     | 100   | 121          |
| S26    | 8    | 3        | Ep            | 40.61  |       | 31.44 | 1.89  |      |       | 23.06 |      |      |       |       |      |      |      |       |     |      |      |       |       |       |       |      |       |     | 97    | 110          |
| S26    | 8    | 4        | Ep            | 42.33  |       | 29.56 | 1.14  |      | 0.87  | 21.46 |      |      |       |       | 1.64 |      |      |       |     |      |      |       |       |       |       |      |       |     | 97    | 112          |
| S26    | 8    | 5        | Feohy +       | 10.14  | 0.96  | 5.20  | 75.32 |      |       | 0.97  | 0.88 | 0.56 | 1.59  |       |      |      |      |       |     |      |      |       |       |       |       |      | 4.38  |     | 100   | 81           |
| S26    | 8    | 6        | Tur           | 38.52  | 0.93  | 32.17 | 6.48  |      | 6.24  | 0.33  | 2.34 |      |       |       |      |      |      |       |     |      |      |       |       |       |       |      |       |     | 87    | 101          |
| S26    | 8    | 7        | Cpx           | 54.87  |       | 2.26  | 3.52  |      | 16.84 | 21.86 |      |      |       |       |      |      |      | 0.66  |     |      |      |       |       |       |       |      |       |     | 100   | 117          |
| S26    | 8    | 8        | Ep            | 40.01  |       | 23.67 | 10.94 |      |       | 22.38 |      |      |       |       |      |      |      |       |     |      |      |       |       |       |       |      |       |     | 97    | 109          |
| S26    | 8    | 9        | Feohy +       | 5.85   |       | 1.60  | 87.34 |      |       | 0.40  |      |      | 2.12  |       |      |      | 0.65 |       |     | 0.76 | 1.28 |       |       |       |       |      |       | 100 | 77    |              |
| S26    | 8    | 10       | Feohy +       | 8.90   |       | 3.00  | 85.94 |      | 0.96  |       |      |      | 1.20  |       |      |      |      |       |     |      |      |       |       |       |       |      |       |     | 100   | 78           |

Table B14.1: Mineral chemical analyses of sample S26.

| Sample | Site | Position | Mineral                | SiO2   | TiO2  | Al2O3 | FeO    | MnO  | MgO   | CaO   | Na2O | K2O   | P2O5  | SO3  | F    | Cl | V2O5 | Cr2O3 | NiO | CuO | ZnO  | As2O3 | ZrO2 | Nb2O5 | SnO2 | HfO2 | WO3  | PbO | Total | Actual Total |
|--------|------|----------|------------------------|--------|-------|-------|--------|------|-------|-------|------|-------|-------|------|------|----|------|-------|-----|-----|------|-------|------|-------|------|------|------|-----|-------|--------------|
| S26    | 8    | 11       | Feohy +                | 5.77   |       | 1.02  | 89.41  |      |       | 0.43  |      |       | 1.39  |      |      |    | 0.57 |       |     |     | 1.40 |       |      |       |      |      |      |     | 100   | 79           |
| S26    | 8    | 12       | Ep                     | 39.84  |       | 23.15 | 11.36  |      |       | 22.65 |      |       |       |      |      |    |      |       |     |     |      |       |      |       |      |      |      |     | 97    | 111          |
| S26    | 8    | 13       | Qz                     | 100.00 |       |       |        |      |       |       |      |       |       |      |      |    |      |       |     |     |      |       |      |       |      |      |      |     | 100   | 121          |
| S26    | 8    | 14       | Ttn +                  | 23.53  | 45.14 | 2.13  | 6.92   | 0.41 | 0.57  | 20.90 | 0.40 |       |       |      |      |    |      |       |     |     |      |       |      |       |      |      |      |     | 100   | 105          |
| S26    | 8    | 15       | Mix                    | 41.39  |       | 2.85  | 51.31  |      | 0.73  |       |      | 0.80  |       |      |      |    |      |       |     |     |      |       |      |       |      |      | 2.93 |     | 100   | 91           |
| S26    | 8    | 16       | Cpx                    | 53.31  |       | 4.30  | 2.30   |      | 16.31 | 22.87 |      |       |       |      |      |    |      | 0.91  |     |     |      |       |      |       |      |      |      |     | 100   | 109          |
| S26    | 8    | 17       | Feohy +                | 34.10  |       | 7.26  | 53.84  |      | 1.23  |       | 0.83 | 0.73  | 2.00  |      |      |    |      |       |     |     |      |       |      |       |      |      |      |     | 100   | 90           |
| S26    | 8    | 18       | Ap +                   |        |       |       | 0.63   |      |       | 48.93 | 0.44 |       | 39.74 | 0.57 | 8.09 |    |      |       |     |     |      |       |      |       |      |      | 1.60 |     | 100   | 114          |
| S26    | 8    | 19       | Feohy +                | 3.66   |       | 1.26  | 93.04  |      | 0.79  |       |      |       | 1.25  |      |      |    |      |       |     |     |      |       |      |       |      |      |      |     | 100   | 79           |
| S26    | 8    | 20       | Qz                     | 100.00 |       |       |        |      |       |       |      |       |       |      |      |    |      |       |     |     |      |       |      |       |      |      |      |     | 100   | 113          |
| S26    | 8    | 21       | Spl                    |        |       | 38.72 | 16.42  |      | 15.71 |       |      |       |       |      |      |    |      | 29.15 |     |     |      |       |      |       |      |      |      |     | 100   | 111          |
| S26    | 8    | 22       | Feohy +                | 6.93   |       | 2.89  | 88.83  | 0.54 |       |       |      |       |       | 0.81 |      |    |      |       |     |     |      |       |      |       |      |      |      |     | 100   | 80           |
| S26    | 8    | 23       | Mix                    | 55.33  | 1.02  | 14.03 | 10.71  |      | 6.66  | 6.37  | 4.96 | 0.32  | 0.59  |      |      |    |      |       |     |     |      |       |      |       |      |      |      |     | 100   | 106          |
| S26    | 8    | 24       | Ep                     | 40.42  |       | 30.72 | 1.83   |      |       | 22.55 |      |       |       |      | 1.47 |    |      |       |     |     |      |       |      |       |      |      |      |     | 97    | 115          |
| S26    | 8    | 25       | TiO <sub>2</sub> + Chl | 3.03   | 80.94 | 3.70  | 4.10   | 0.35 |       | 0.49  | 0.70 |       | 1.65  |      | 4.68 |    |      | 0.35  |     |     |      |       |      |       |      |      |      |     | 100   | 105          |
| S26    | 8    | 26       | Feohy                  |        |       |       | 98.82  | 0.75 |       | 0.43  |      |       |       |      |      |    |      |       |     |     |      |       |      |       |      |      |      |     | 100   | 81           |
| S26    | 8    | 27       | Ap +                   |        |       | 0.47  | 0.38   |      |       | 45.53 | 1.14 |       | 38.60 | 1.72 | 9.41 |    |      |       |     |     |      |       |      |       |      |      | 2.75 |     | 100   | 125          |
| S26    | 8    | 28       | Feohy                  |        |       |       | 100.00 |      |       |       |      |       |       |      |      |    |      |       |     |     |      |       |      |       |      |      |      |     | 100   | 95           |
| S26    | 8    | 29       | Feohy +                | 3.58   |       | 1.64  | 91.71  |      |       |       |      |       |       |      |      |    |      |       |     |     | 1.05 |       |      |       |      |      | 2.02 |     | 100   | 87           |
| S26    | 8    | 30       | Ms                     | 51.29  | 0.45  | 24.69 | 5.01   |      | 2.90  |       |      | 10.67 |       |      |      |    |      |       |     |     |      |       |      |       |      |      |      |     | 95    | 117          |
| S26    | 8    | 31       | Qz                     | 100.00 |       |       |        |      |       |       |      |       |       |      |      |    |      |       |     |     |      |       |      |       |      |      |      |     | 100   | 126          |
| S26    | 8    | 32       | Feohy +                | 4.32   |       | 1.11  | 93.47  |      | 0.71  | 0.39  |      |       |       |      |      |    |      |       |     |     |      |       |      |       |      |      |      |     | 100   | 89           |
| S26    | 8    | 33       | Ep                     | 40.70  |       | 26.70 | 6.78   |      |       | 22.81 |      |       |       |      |      |    |      |       |     |     |      |       |      |       |      |      |      |     | 97    | 114          |
| S26    | 8    | 34       | Ttn                    | 32.81  | 33.68 | 3.29  | 0.65   |      |       | 27.55 |      |       |       |      | 2.03 |    |      |       |     |     |      |       |      |       |      |      |      |     | 100   | 120          |
| S26    | 8    | 35       | Spl                    |        |       | 40.28 | 16.13  |      | 16.43 |       |      |       |       |      |      |    |      | 27.16 |     |     |      |       |      |       |      |      |      |     | 100   | 116          |
| S26    | 8    | 36       | Feohy +                | 3.76   |       | 2.60  | 84.38  | 0.92 |       |       |      |       | 2.37  | 1.18 |      |    |      | 0.76  |     |     |      |       |      |       |      |      | 4.04 |     | 100   | 82           |
| S26    | 8    | 37       | Feohy +                | 3.08   |       |       | 91.67  |      |       | 0.60  |      |       | 4.65  |      |      |    |      |       |     |     |      |       |      |       |      |      |      |     | 100   | 80           |
| S26    | 8    | 38       | Feohy +                | 8.47   | 0.45  | 1.44  | 85.48  |      |       | 0.43  |      |       | 1.68  |      |      |    |      |       |     |     | 2.04 |       |      |       |      |      |      |     | 100   | 81           |
| S26    | 8.1  | 1        | Chl                    | 25.07  |       | 21.75 | 26.66  |      | 11.53 |       |      |       |       |      |      |    |      |       |     |     |      |       |      |       |      |      |      |     | 85    | 100          |
| S26    | 8.1  | 2        | Chl                    | 26.03  |       | 23.20 | 23.32  |      | 12.45 |       |      |       |       |      |      |    |      |       |     |     |      |       |      |       |      |      |      |     | 85    | 47           |
| S26    | 9    | 1        | TiO <sub>2</sub> +     | 1.15   | 98.53 |       |        |      |       | 0.32  |      |       |       |      |      |    |      |       |     |     |      |       |      |       |      |      |      |     | 100   | 108          |
| S26    | 9    | 2        | Feohy +                | 1.24   |       |       | 98.76  |      |       |       |      |       |       |      |      |    |      |       |     |     |      |       |      |       |      |      |      |     | 100   | 91           |
| S26    | 9    | 3        | Qz +                   | 96.37  |       | 1.96  | 0.89   |      |       |       | 0.32 | 0.46  |       |      |      |    |      |       |     |     |      |       |      |       |      |      |      |     | 100   | 105          |
| S26    | 9    | 4        | Feohy +                | 5.70   |       | 1.99  | 90.91  |      |       | 0.35  |      |       | 1.05  |      |      |    |      |       |     |     |      |       |      |       |      |      |      |     | 100   | 78           |
| S26    | 9    | 5        | Ttn                    | 33.21  | 36.85 | 2.03  |        |      |       | 27.91 |      |       |       |      |      |    |      |       |     |     |      |       |      |       |      |      |      |     | 100   | 111          |
| S26    | 9    | 6        | Chr                    |        |       | 17.29 | 16.86  |      | 12.38 |       |      |       |       |      |      |    | 0.50 | 52.97 |     |     |      |       |      |       |      |      |      |     | 100   | 108          |
| S26    | 9    | 7        | Feohy                  |        | 6.54  | 0.90  | 91.82  |      |       |       |      |       |       |      |      |    | 0.74 |       |     |     |      |       |      |       |      |      |      |     | 100   | 96           |
| S26    | 9    | 8        | Chr + Chl              | 24.55  |       | 14.51 | 16.36  |      | 25.25 |       | 0.53 |       |       |      |      |    |      | 18.80 |     |     |      |       |      |       |      |      |      |     | 100   | 101          |
| S26    | 9    | 9        | Feohy +                | 4.11   |       |       | 95.44  |      |       | 0.45  |      |       |       |      |      |    |      |       |     |     |      |       |      |       |      |      |      |     | 100   | 78           |
| S26    | 9    | 10       | Ttn                    | 29.04  | 37.77 | 5.45  | 0.86   |      |       | 23.57 |      |       |       |      | 3.31 |    |      |       |     |     |      |       |      |       |      |      |      |     | 100   | 111          |
| S26    | 9    | 11       | Feohy +                | 3.14   |       | 0.96  | 95.90  |      |       |       |      |       |       |      |      |    |      |       |     |     |      |       |      |       |      |      |      |     | 100   | 63           |
| S26    | 9    | 12       | "Ol" + Chl             | 46.12  |       | 10.53 | 3.80   |      | 39.55 |       |      |       |       |      |      |    |      |       |     |     |      |       |      |       |      |      |      |     | 100   | 102          |
| S26    | 9    | 13       | Spl                    |        |       | 46.56 | 16.62  |      | 16.47 |       |      |       |       |      |      |    |      | 20.34 |     |     |      |       |      |       |      |      |      |     | 100   | 109          |
| S26    | 9    | 14       | Opx                    | 53.65  |       | 1.37  | 24.26  | 0.65 | 19.60 | 0.46  |      |       |       |      |      |    |      |       |     |     |      |       |      |       |      |      |      |     | 100   | 109          |
| S26    | 9    | 15       | Feohy +                | 1.84   |       | 2.24  | 87.86  |      |       | 0.71  |      |       | 2.06  |      |      |    |      |       |     |     |      |       |      |       |      |      | 5.28 |     | 100   | 80           |
| S26    | 9    | 16       | "Chr"                  |        |       | 16.17 | 53.83  |      | 6.16  |       |      |       |       |      |      |    |      | 23.84 |     |     |      |       |      |       |      |      |      |     | 100   | 96           |
| S26    | 9    | 17       | "Ttn"                  | 16.27  | 68.52 |       | 0.62   |      |       | 12.98 |      |       |       |      |      |    | 1.61 |       |     |     |      |       |      |       |      |      |      |     | 100   | 106          |
| S26    | 9    | 18       | Feohy +                | 6.99   |       | 2.58  | 90.05  |      |       | 0.38  |      |       |       |      |      |    |      |       |     |     |      |       |      |       |      |      |      |     | 100   | 74           |
| S26    | 9    | 19       | Opx                    | 51.69  |       | 1.06  | 3.78   |      | 43.47 |       |      |       |       |      |      |    |      |       |     |     |      |       |      |       |      |      |      |     | 100   | 90           |
| S26    | 9    | 20       | Ap                     |        |       |       |        |      |       | 49.53 |      |       | 45.10 |      | 5.37 |    |      |       |     |     |      |       |      |       |      |      |      |     | 100   | 115          |
| S26    | 9    | 21       | Ep                     | 40.48  |       | 26.27 | 7.99   |      |       | 22.25 |      |       |       |      |      |    |      |       |     |     |      |       |      |       |      |      |      |     | 97    | 107          |
| S26    | 9    | 22       | Feohy +                | 3.60   |       | 0.89  | 94.49  |      |       |       |      |       |       |      |      |    |      |       |     |     | 1.02 |       |      |       |      |      |      |     | 100   | 77           |
| S26    | 9    | 23       | Chr                    |        |       | 27.21 | 16.38  |      | 14.15 |       |      |       |       |      |      |    | 0.43 | 41.83 |     |     |      |       |      |       |      |      |      |     | 100   | 108          |
| S26    | 9    | 24       | Feohy +                | 3.92   |       | 1.64  | 90.24  |      | 0.82  |       |      |       |       |      |      |    |      |       |     |     |      |       |      |       |      |      | 3.38 |     | 100   | 80           |
| S26    | 9    | 25       | St                     | 30.01  | 0.61  | 55.00 | 11.99  |      | 1.59  |       |      |       |       |      |      |    |      |       |     |     | 0.80 |       |      |       |      |      |      |     | 100   | 109          |

Table B14.1: Mineral chemical analyses of sample S26.

| Sample | Site | Position | Mineral               | SiO2   | TiO2  | Al2O3 | FeO   | MnO  | MgO   | CaO   | Na2O | K2O  | P2O5  | SO3   | F    | Cl   | V2O5 | Cr2O3 | NiO  | CuO | ZnO  | As2O3 | ZrO2 | Nb2O5 | SnO2 | HfO2  | WO3  | PbO | Total | Actual Total |
|--------|------|----------|-----------------------|--------|-------|-------|-------|------|-------|-------|------|------|-------|-------|------|------|------|-------|------|-----|------|-------|------|-------|------|-------|------|-----|-------|--------------|
| S26    | 9    | 26       | Feohy +               | 5.70   |       |       | 93.41 |      |       |       |      |      |       |       |      |      |      |       |      |     | 0.89 |       |      |       |      |       |      |     | 100   | 78           |
| S26    | 9    | 27       | Ilm                   |        | 51.12 |       | 45.95 | 2.93 |       |       |      |      |       |       |      |      |      |       |      |     |      |       |      |       |      |       |      |     | 100   | 107          |
| S26    | 9    | 28       | Ep                    | 40.26  |       | 25.09 | 9.16  |      |       | 22.49 |      |      |       |       |      |      |      |       |      |     |      |       |      |       |      |       |      |     | 97    | 112          |
| S26    | 9    | 29       | Ap                    |        |       |       |       |      |       | 49.35 |      |      | 44.50 |       | 6.15 |      |      |       |      |     |      |       |      |       |      |       |      |     | 100   | 125          |
| S26    | 9    | 30       | Ep                    | 40.69  |       | 25.02 | 9.20  |      |       | 22.10 |      |      |       |       |      |      |      |       |      |     |      |       |      |       |      |       |      |     | 97    | 111          |
| S26    | 9    | 31       | Ep                    | 40.19  |       | 25.43 | 8.32  | 0.29 |       | 22.77 |      |      |       |       |      |      |      |       |      |     |      |       |      |       |      |       |      |     | 97    | 112          |
| S26    | 9    | 32       | Feohy +               | 3.83   |       | 2.50  | 91.69 |      |       |       |      |      | 1.11  |       |      |      |      |       | 0.86 |     |      |       |      |       |      |       |      |     | 100   | 76           |
| S26    | 9    | 33       | Feohy +               | 4.16   |       | 5.33  | 82.78 |      | 1.08  |       |      |      | 1.35  |       |      |      |      |       |      |     |      |       |      |       |      | 5.29  |      |     | 100   | 81           |
| S26    | 9    | 34       | Feohy +               | 4.59   |       | 0.95  | 93.34 |      |       |       |      |      | 1.13  |       |      |      |      |       |      |     |      |       |      |       |      |       |      |     | 100   | 83           |
| S26    | 9    | 35       | Feohy +               | 2.74   |       |       | 96.32 |      |       |       |      |      |       |       |      |      |      | 0.95  |      |     |      |       |      |       |      |       |      |     | 100   | 81           |
| S26    | 9    | 36       | Spl                   |        | 0.40  | 31.40 | 14.49 |      | 14.78 |       |      |      |       |       |      |      |      | 38.93 |      |     |      |       |      |       |      |       |      |     | 100   | 113          |
| S26    | 9    | 37       | Ilm + Py              | 1.15   | 38.06 | 0.55  | 37.38 | 0.60 |       | 1.54  |      |      |       | 17.03 |      |      |      |       |      |     |      |       |      |       |      |       | 3.68 |     | 100   | 62           |
| S26    | 9    | 38       | Feohy +               | 12.12  |       | 6.28  | 78.71 |      | 0.70  |       |      | 0.74 | 1.44  |       |      |      |      |       |      |     |      |       |      |       |      |       |      |     | 100   | 82           |
| S26    | 9    | 39       | "Chr" + Chl           | 4.52   | 0.57  | 1.37  | 60.68 | 0.95 | 4.12  |       |      |      |       |       |      |      |      | 27.79 |      |     |      |       |      |       |      |       |      |     | 100   | 91           |
| S26    | 9.1  | 1        | Ilm                   |        | 53.73 |       | 44.26 | 1.60 |       | 0.41  |      |      |       |       |      |      |      |       |      |     |      |       |      |       |      |       |      |     | 100   | 102          |
| S26    | 9.1  | 2        | Feohy +               | 2.75   | 16.38 |       | 72.48 | 1.01 |       | 2.53  |      |      |       |       |      |      |      |       |      |     |      |       |      |       |      |       |      |     | 100   | 102          |
| S26    | 9.1  | 3        | Ttn                   | 33.34  | 29.06 | 4.55  | 6.70  |      | 2.11  | 22.91 |      |      |       |       |      |      | 1.33 |       |      |     |      |       |      |       |      |       |      |     | 100   | 108          |
| S26    | 9.1  | 4        | Feohy                 |        | 4.53  |       | 95.47 |      |       |       |      |      |       |       |      |      |      |       |      |     |      |       |      |       |      |       |      |     | 100   | 94           |
| S26    | 9.1  | 5        | Ilm +                 | 1.62   | 57.14 | 0.78  | 37.90 | 0.83 | 1.04  | 0.70  |      |      |       |       |      |      |      |       |      |     |      |       |      |       |      |       |      |     | 100   | 104          |
| S26    | 9.1  | 6        | Ttn                   | 32.82  | 36.02 | 1.57  | 2.12  |      |       | 27.47 |      |      |       |       |      |      |      |       |      |     |      |       |      |       |      |       |      |     | 100   | 112          |
| S26    | 10   | 1        | Ms + TiO <sub>2</sub> | 44.03  | 22.35 | 20.48 | 2.18  |      | 1.57  |       | 0.64 | 6.22 |       |       | 2.54 |      |      |       |      |     |      |       |      |       |      |       |      |     | 100   | 111          |
| S26    | 10   | 2        | Ap +                  |        |       |       | 0.56  |      | 0.73  | 45.90 | 1.16 | 0.15 | 44.22 |       | 2.10 | 2.28 |      |       |      |     |      |       |      |       |      | 2.91  |      |     | 100   | 89           |
| S26    | 10   | 3        | Feohy +               | 6.09   |       | 2.19  | 85.75 |      |       | 0.47  |      |      | 1.05  |       |      |      |      |       |      |     | 1.62 |       |      |       |      |       | 2.82 |     | 100   | 76           |
| S26    | 10   | 4        | Feohy + Chl +         | 12.96  | 0.55  | 8.75  | 70.19 | 1.11 | 1.46  | 0.53  | 0.91 | 0.70 | 2.84  |       |      |      |      |       |      |     |      |       |      |       |      |       |      |     | 100   | 85           |
| S26    | 10   | 5        | Pl (Byt) +            | 59.85  |       | 15.91 | 8.21  |      |       | 16.03 |      |      |       |       |      |      |      |       |      |     |      |       |      |       |      |       |      |     | 100   | 122          |
| S26    | 10   | 6        | Qz                    | 97.63  |       |       | 2.37  |      |       |       |      |      |       |       |      |      |      |       |      |     |      |       |      |       |      |       |      |     | 100   | 124          |
| S26    | 10   | 7        | Qz +                  | 80.36  |       | 9.92  | 0.65  |      |       | 7.94  | 1.12 |      |       |       |      |      |      |       |      |     |      |       |      |       |      |       |      |     | 100   | 119          |
| S26    | 10   | 8        | Ep                    | 40.84  |       | 25.39 | 8.28  |      |       | 22.49 |      |      |       |       |      |      |      |       |      |     |      |       |      |       |      |       |      |     | 97    | 113          |
| S26    | 10   | 9        | Feohy + Chl           | 5.05   |       | 2.87  | 80.70 |      | 1.38  | 0.73  | 1.38 |      | 1.77  |       |      |      |      | 0.46  |      |     |      |       |      |       |      | 5.66  |      |     | 100   | 67           |
| S26    | 10   | 10       | Chr                   |        |       | 14.41 | 19.43 |      | 9.58  |       |      |      |       |       |      |      |      | 56.59 |      |     |      |       |      |       |      |       |      |     | 100   | 108          |
| S26    | 10   | 11       | Mix                   | 66.72  | 2.09  | 13.49 | 4.29  |      | 1.82  | 5.06  | 0.93 |      |       |       | 5.11 |      |      | 0.49  |      |     |      |       |      |       |      |       |      |     | 100   | 64           |
| S26    | 10   | 12       | Chr                   |        |       | 8.31  | 28.12 |      | 6.93  |       |      |      |       |       |      |      |      | 56.63 |      |     |      |       |      |       |      |       |      |     | 100   | 106          |
| S26    | 10   | 13       | Feohy +               | 2.18   | 0.81  | 6.78  | 71.28 |      | 1.07  | 0.43  | 1.18 |      | 2.46  |       |      |      |      | 0.54  |      |     |      |       |      |       |      | 13.28 |      |     | 100   | 68           |
| S26    | 10   | 14       | Spl                   |        |       | 33.20 | 13.99 |      | 16.72 |       |      |      |       |       |      |      |      | 36.09 |      |     |      |       |      |       |      |       |      |     | 100   | 108          |
| S26    | 10   | 15       | Opx                   | 51.00  |       | 1.14  | 5.62  |      | 42.04 |       |      |      |       |       |      |      |      |       |      |     |      |       |      |       |      | 0.20  |      |     | 100   | 94           |
| S26    | 10   | 16       | Ep                    | 40.76  |       | 26.81 | 6.57  |      |       | 22.86 |      |      |       |       |      |      |      |       |      |     |      |       |      |       |      |       |      |     | 97    | 106          |
| S26    | 10   | 17       | Feohy +               | 7.95   |       | 3.95  | 85.08 |      | 1.43  | 0.46  |      |      | 1.14  |       |      |      |      |       |      |     |      |       |      |       |      |       |      |     | 100   | 76           |
| S26    | 10   | 18       | Feohy +               | 2.93   |       | 0.49  | 92.48 |      |       |       |      |      |       |       |      |      |      |       |      |     |      |       |      |       |      | 4.09  |      |     | 100   | 65           |
| S26    | 10   | 19       | Feohy + Chl           | 11.77  |       | 4.69  | 82.30 |      | 0.80  |       |      | 0.44 |       |       |      |      |      |       |      |     |      |       |      |       |      |       |      |     | 100   | 75           |
| S26    | 10   | 20       | Ep                    | 41.31  |       | 27.90 | 3.28  |      | 1.12  | 23.39 |      |      |       |       |      |      |      |       |      |     |      |       |      |       |      |       |      |     | 97    | 98           |
| S26    | 10   | 21       | Ep                    | 41.70  |       | 29.31 | 2.29  |      | 1.26  | 22.44 |      |      |       |       |      |      |      |       |      |     |      |       |      |       |      |       |      |     | 97    | 101          |
| S26    | 10   | 22       | Feohy +               | 8.85   |       |       | 78.21 |      | 1.11  |       |      |      | 2.07  | 3.67  |      |      |      |       |      |     |      |       |      |       |      | 6.08  |      |     | 100   | 39           |
| S26    | 10   | 23       | Ttn                   | 33.09  | 36.52 | 1.98  | 0.48  |      |       | 27.93 |      |      |       |       |      |      |      |       |      |     |      |       |      |       |      |       |      |     | 100   | 105          |
| S26    | 10   | 24       | Feohy +               | 5.08   |       |       | 91.70 |      | 0.90  | 0.33  |      |      |       | 1.99  |      |      |      |       |      |     |      |       |      |       |      |       |      |     | 100   | 75           |
| S26    | 10   | 25       | Qz                    | 100.00 |       |       |       |      |       |       |      |      |       |       |      |      |      |       |      |     |      |       |      |       |      |       |      |     | 100   | 118          |
| S26    | 10   | 26       | Feohy +               | 2.74   |       |       | 97.26 |      |       |       |      |      |       |       |      |      |      |       |      |     |      |       |      |       |      |       |      |     | 100   | 78           |
| S26    | 10   | 27       | Feohy +               | 7.47   |       | 5.27  | 83.84 |      | 0.95  | 0.55  |      |      | 1.32  |       |      |      |      | 0.61  |      |     |      |       |      |       |      |       |      |     | 100   | 77           |
| S26    | 10   | 28       | Feohy +               | 37.04  | 3.13  | 0.78  | 57.10 |      |       | 0.80  |      |      |       |       |      |      | 0.37 | 0.78  |      |     |      |       |      |       |      |       |      |     | 100   | 163          |
| S26    | 10   | 29       | Ap +                  |        |       | 0.74  | 0.38  |      |       | 45.77 | 1.18 |      | 39.32 | 2.25  | 8.30 |      |      |       |      |     |      |       |      |       |      | 2.05  |      |     | 100   | 114          |
| S26    | 10   | 30       | Feohy +               | 26.78  |       | 9.95  | 54.07 |      | 1.12  |       | 0.63 | 1.11 | 1.35  |       |      |      |      |       |      |     |      |       |      |       |      | 4.98  |      |     | 100   | 85           |
| S26    | 10   | 31       | Amph                  | 53.66  |       | 4.42  | 9.93  |      | 17.26 | 10.77 | 0.58 |      |       |       |      |      |      | 0.38  |      |     |      |       |      |       |      |       |      |     | 97    | 112          |
| S26    | 10.1 | 1        | Cpx                   | 56.26  |       |       | 2.27  |      | 17.56 | 23.91 |      |      |       |       |      |      |      |       |      |     |      |       |      |       |      |       |      |     | 100   | 118          |
| S26    | 10.1 | 2        | Opx                   | 50.54  |       | 1.44  | 3.74  |      | 43.97 |       |      |      |       |       |      |      |      | 0.30  |      |     |      |       |      |       |      |       |      |     | 100   | 102          |
| S26    | 10.1 | 3        | Opx                   | 50.63  |       | 0.56  | 10.76 | 0.34 | 37.43 | 0.28  |      |      |       |       |      |      |      |       |      |     |      |       |      |       |      |       |      |     | 100   | 105          |
| S26    | 10.1 | 4        | "Chr"                 |        | 3.44  | 3.26  | 74.22 | 0.90 | 0.61  | 0.57  |      |      |       |       |      |      | 1.43 | 15.59 |      |     |      |       |      |       |      |       |      |     | 100   | 100          |

Table B14.1: Mineral chemical analyses of sample S26.

| Sample | Site | Position | Mineral            | SiO <sub>2</sub> | TiO <sub>2</sub> | Al <sub>2</sub> O <sub>3</sub> | FeO   | MnO   | MgO   | CaO   | Na <sub>2</sub> O | K <sub>2</sub> O | P <sub>2</sub> O <sub>5</sub> | SO <sub>3</sub> | F     | Cl | V <sub>2</sub> O <sub>5</sub> | Cr <sub>2</sub> O <sub>3</sub> | NiO  | CuO | ZnO  | As <sub>2</sub> O <sub>3</sub> | ZrO <sub>2</sub> | Nb <sub>2</sub> O <sub>5</sub> | SnO <sub>2</sub> | HfO <sub>2</sub> | WO <sub>3</sub> | PbO | Total | Actual Total |
|--------|------|----------|--------------------|------------------|------------------|--------------------------------|-------|-------|-------|-------|-------------------|------------------|-------------------------------|-----------------|-------|----|-------------------------------|--------------------------------|------|-----|------|--------------------------------|------------------|--------------------------------|------------------|------------------|-----------------|-----|-------|--------------|
| S26    | 10.1 | 5        | "Chr"              | 3.15             | 3.49             | 2.65                           | 68.95 | 0.95  | 2.17  | 1.13  |                   |                  |                               |                 |       |    | 1.49                          | 16.00                          |      |     |      |                                |                  |                                |                  |                  |                 |     | 100   | 102          |
| S26    | 11   | 1        | Qz                 | 100.00           |                  |                                |       |       |       |       |                   |                  |                               |                 |       |    |                               |                                |      |     |      |                                |                  |                                |                  |                  |                 |     | 100   | 122          |
| S26    | 11   | 2        | "Ilm" +            | 13.30            | 60.66            | 8.15                           | 11.07 |       | 5.37  | 0.49  | 0.56              | 0.42             |                               |                 |       |    |                               |                                |      |     |      |                                |                  |                                |                  |                  |                 |     | 100   | 103          |
| S26    | 11   | 3        | Cal                | 0.72             |                  |                                | 0.45  | 0.24  | 0.64  | 30.06 | 0.36              | 0.10             |                               |                 | 23.44 |    |                               |                                |      |     |      |                                |                  |                                |                  |                  |                 |     | 56    | 95           |
| S26    | 11   | 4        | Chr                |                  | 0.48             | 20.57                          | 20.54 |       | 11.75 |       |                   |                  |                               |                 |       |    |                               | 46.67                          |      |     |      |                                |                  |                                |                  |                  |                 |     | 100   | 109          |
| S26    | 11   | 5        | Feohy +            | 4.37             |                  | 1.05                           | 94.13 |       |       | 0.45  |                   |                  |                               |                 |       |    |                               |                                |      |     |      |                                |                  |                                |                  |                  |                 |     | 100   | 85           |
| S26    | 11   | 6        | Chr                |                  |                  | 15.52                          | 16.91 |       | 9.65  |       |                   |                  |                               |                 |       |    |                               | 57.92                          |      |     |      |                                |                  |                                |                  |                  |                 |     | 100   | 110          |
| S26    | 11   | 7        | St                 | 30.14            | 0.67             | 53.72                          | 13.18 |       | 2.29  |       |                   |                  |                               |                 |       |    |                               |                                |      |     |      |                                |                  |                                |                  |                  |                 |     | 100   | 117          |
| S26    | 11   | 8        | Feohy +            | 6.80             |                  | 0.70                           | 91.88 |       |       |       |                   |                  |                               |                 |       |    |                               | 0.61                           |      |     |      |                                |                  |                                |                  |                  |                 |     | 100   | 84           |
| S26    | 11   | 9        | Cpx                | 52.45            | 0.98             | 2.94                           | 6.87  | 0.31  | 14.73 | 21.32 | 0.41              |                  |                               |                 |       |    |                               |                                |      |     |      |                                |                  |                                |                  |                  |                 |     | 100   | 121          |
| S26    | 11   | 10       | Feohy              |                  |                  |                                | 95.15 | 0.51  |       |       |                   |                  |                               |                 |       |    |                               |                                |      |     |      |                                |                  |                                |                  |                  | 4.34            |     | 100   | 85           |
| S26    | 11   | 11       | Ep                 | 38.24            | 2.44             | 19.84                          | 13.97 |       |       | 22.50 |                   |                  |                               |                 |       |    |                               |                                |      |     |      |                                |                  |                                |                  |                  |                 |     | 97    | 113          |
| S26    | 11   | 12       | Feohy +            | 5.31             |                  | 0.84                           | 93.09 |       |       | 0.35  |                   |                  |                               |                 |       |    |                               | 0.42                           |      |     |      |                                |                  |                                |                  |                  |                 |     | 100   | 81           |
| S26    | 11   | 13       | Ms                 | 53.32            | 0.34             | 24.84                          | 1.84  |       | 1.75  | 1.64  | 3.14              | 5.51             |                               |                 | 2.61  |    |                               |                                |      |     |      |                                |                  |                                |                  |                  |                 |     | 95    | 118          |
| S26    | 11   | 14       | Feohy +            | 6.81             |                  | 3.46                           | 82.70 |       | 1.11  | 0.47  |                   |                  | 1.82                          |                 |       |    |                               |                                |      |     |      |                                |                  |                                |                  |                  | 3.64            |     | 100   | 73           |
| S26    | 11   | 15       | Ep                 | 39.99            |                  | 24.80                          | 9.80  |       |       | 22.41 |                   |                  |                               |                 |       |    |                               |                                |      |     |      |                                |                  |                                |                  |                  |                 |     | 97    | 112          |
| S26    | 11   | 16       | Feohy +            | 3.39             |                  | 0.72                           | 94.21 | 0.68  |       |       |                   |                  |                               | 1.00            |       |    |                               |                                |      |     |      |                                |                  |                                |                  |                  |                 |     | 100   | 80           |
| S26    | 11   | 17       | Qz +               | 88.92            |                  | 2.61                           | 1.59  |       |       | 6.89  |                   |                  |                               |                 |       |    |                               |                                |      |     |      |                                |                  |                                |                  |                  |                 |     | 100   | 121          |
| S26    | 11   | 18       | Spl                |                  |                  | 41.67                          | 14.44 |       | 16.80 |       |                   |                  |                               |                 |       |    |                               | 27.09                          |      |     |      |                                |                  |                                |                  |                  |                 |     | 100   | 109          |
| S26    | 11   | 19       | Feohy +            | 5.42             |                  | 2.05                           | 88.80 |       |       | 0.50  |                   |                  | 1.43                          |                 |       |    | 0.57                          |                                |      |     | 1.23 |                                |                  |                                |                  |                  |                 |     | 100   | 79           |
| S26    | 11   | 20       | Feohy +            | 6.19             |                  | 3.52                           | 82.50 |       |       |       |                   |                  | 1.17                          | 0.95            |       |    |                               |                                | 3.89 |     | 1.79 |                                |                  |                                |                  |                  |                 |     | 100   | 76           |
| S26    | 11   | 21       | Ep                 | 40.45            |                  | 26.89                          | 6.88  |       |       | 22.79 |                   |                  |                               |                 |       |    |                               |                                |      |     |      |                                |                  |                                |                  |                  |                 |     | 97    | 110          |
| S26    | 11   | 22       | Ep                 | 40.45            |                  | 25.42                          | 8.59  |       |       | 22.53 |                   |                  |                               |                 |       |    |                               |                                |      |     |      |                                |                  |                                |                  |                  |                 |     | 97    | 107          |
| S26    | 11   | 23       | "Ilm" +            | 1.47             | 71.19            | 0.74                           | 24.51 | 2.09  |       |       |                   |                  |                               |                 |       |    |                               |                                |      |     |      |                                |                  |                                |                  |                  |                 |     | 100   | 92           |
| S26    | 11   | 24       | Feohy +            | 10.71            |                  | 4.28                           | 84.61 |       |       |       |                   | 0.41             |                               |                 |       |    |                               |                                |      |     |      |                                |                  |                                |                  |                  |                 |     | 100   | 89           |
| S26    | 11   | 25       | Qz                 | 100.00           |                  |                                |       |       |       |       |                   |                  |                               |                 |       |    |                               |                                |      |     |      |                                |                  |                                |                  |                  |                 |     | 100   | 113          |
| S26    | 11   | 26       | Grt                | 39.92            |                  | 21.04                          | 28.09 |       | 0.96  | 9.99  |                   |                  |                               |                 |       |    |                               |                                |      |     |      |                                |                  |                                |                  |                  |                 |     | 100   | 109          |
| S26    | 11   | 27       | Chl                | 24.30            |                  | 37.00                          | 20.94 | 0.56  | 2.20  |       |                   |                  |                               |                 |       |    |                               |                                |      |     |      |                                |                  |                                |                  |                  |                 |     | 85    | 98           |
| S26    | 11   | 28       | Grt                | 41.76            |                  | 21.26                          | 2.95  |       |       | 34.02 |                   |                  |                               |                 |       |    |                               |                                |      |     |      |                                |                  |                                |                  |                  |                 |     | 100   | 112          |
| S26    | 11   | 29       | Feohy +            | 1.02             |                  |                                | 98.98 |       |       |       |                   |                  |                               |                 |       |    |                               |                                |      |     |      |                                |                  |                                |                  |                  |                 |     | 100   | 76           |
| S26    | 11   | 30       | Chr                |                  |                  | 17.84                          | 15.67 |       | 13.09 |       |                   |                  |                               |                 |       |    | 0.40                          | 53.00                          |      |     |      |                                |                  |                                |                  |                  |                 |     | 100   | 109          |
| S26    | 11   | 31       | Cpx                | 54.85            |                  | 1.35                           | 6.00  | 0.31  | 14.67 | 22.83 |                   |                  |                               |                 |       |    |                               |                                |      |     |      |                                |                  |                                |                  |                  |                 |     | 100   | 116          |
| S26    | 11   | 32       | Feohy +            | 5.23             |                  |                                | 94.36 |       |       |       |                   |                  |                               |                 |       |    |                               | 0.41                           |      |     |      |                                |                  |                                |                  |                  |                 |     | 100   | 79           |
| S26    | 11   | 33       | Qz + Feohy         | 64.38            |                  | 0.93                           | 34.70 |       |       |       |                   |                  |                               |                 |       |    |                               |                                |      |     |      |                                |                  |                                |                  |                  |                 |     | 100   | 94           |
| S26    | 11   | 34       | "Ilm"              | 0.98             | 78.62            |                                | 19.95 | 0.44  |       |       |                   |                  |                               |                 |       |    |                               |                                |      |     |      |                                |                  |                                |                  |                  |                 |     | 100   | 100          |
| S26    | 11   | 35       | TiO <sub>2</sub> + | 6.35             | 92.84            | 0.43                           | 0.37  |       |       |       |                   |                  |                               |                 |       |    |                               |                                |      |     |      |                                |                  |                                |                  |                  |                 |     | 100   | 113          |
| S26    | 11   | 36       | Grt                | 40.13            |                  | 21.33                          | 26.79 | 1.34  | 5.25  | 5.16  |                   |                  |                               |                 |       |    |                               |                                |      |     |      |                                |                  |                                |                  |                  |                 |     | 100   | 118          |
| S26    | 11   | 37       | Ep                 | 40.26            |                  | 25.55                          | 8.14  |       |       | 23.06 |                   |                  |                               |                 |       |    |                               |                                |      |     |      |                                |                  |                                |                  |                  |                 |     | 97    | 113          |
| S26    | 11   | 38       | Feohy +            | 7.93             |                  | 4.69                           | 81.84 |       | 0.96  | 0.33  |                   |                  | 1.45                          |                 |       |    |                               |                                |      |     |      |                                |                  |                                |                  |                  | 2.79            |     | 100   | 81           |
| S26    | 12   | 1        | Chr                | 0.83             |                  | 25.11                          | 15.71 |       | 11.17 |       |                   |                  |                               |                 |       |    | 0.42                          | 46.76                          |      |     |      |                                |                  |                                |                  |                  |                 |     | 100   | 109          |
| S26    | 12   | 2        | TiO <sub>2</sub> + | 4.13             | 91.85            | 2.10                           | 1.92  |       |       |       |                   |                  |                               |                 |       |    |                               |                                |      |     |      |                                |                  |                                |                  |                  |                 |     | 100   | 95           |
| S26    | 12   | 3        | Crm                |                  | 0.53             | 99.47                          |       |       |       |       |                   |                  |                               |                 |       |    |                               |                                |      |     |      |                                |                  |                                |                  |                  |                 |     | 100   | 110          |
| S26    | 12   | 4        | Mix                | 39.56            |                  | 12.08                          | 38.14 |       | 1.74  | 0.51  | 0.52              | 3.95             |                               |                 |       |    |                               |                                |      |     |      |                                |                  |                                |                  |                  | 3.50            |     | 100   | 90           |
| S26    | 12   | 5        | Grt                | 38.09            | 0.34             | 19.90                          | 7.77  | 27.17 | 0.74  | 3.16  |                   |                  |                               |                 | 2.84  |    |                               |                                |      |     |      |                                |                  |                                |                  |                  |                 |     | 100   | 123          |
| S26    | 12   | 6        | Qz                 | 100.00           |                  |                                |       |       |       |       |                   |                  |                               |                 |       |    |                               |                                |      |     |      |                                |                  |                                |                  |                  |                 |     | 100   | 127          |
| S26    | 12   | 7        | Spl                | 1.97             |                  | 47.71                          | 12.24 |       | 17.64 | 1.54  |                   |                  |                               |                 |       |    |                               | 18.90                          |      |     |      |                                |                  |                                |                  |                  |                 |     | 100   | 117          |
| S26    | 12   | 8        | Mix                | 40.21            |                  | 19.49                          | 6.19  |       | 25.08 | 9.04  |                   |                  |                               |                 |       |    |                               |                                |      |     |      |                                |                  |                                |                  |                  |                 |     | 100   | 106          |
| S26    | 12   | 9        | Ep                 | 40.40            |                  | 23.13                          | 11.20 |       |       | 22.27 |                   |                  |                               |                 |       |    |                               |                                |      |     |      |                                |                  |                                |                  |                  |                 |     | 97    | 116          |
| S26    | 12   | 10       | Feohy +            | 2.01             |                  |                                | 97.56 |       |       | 0.44  |                   |                  |                               |                 |       |    |                               |                                |      |     |      |                                |                  |                                |                  |                  |                 |     | 100   | 82           |
| S26    | 12   | 11       | Ilm                |                  | 56.71            |                                | 40.53 | 2.76  |       |       |                   |                  |                               |                 |       |    |                               |                                |      |     |      |                                |                  |                                |                  |                  |                 |     | 100   | 108          |
| S26    | 12   | 12       | Feohy + Chl        | 12.29            |                  | 6.47                           | 77.59 |       | 1.51  |       |                   | 0.47             | 1.67                          |                 |       |    |                               |                                |      |     |      |                                |                  |                                |                  |                  |                 |     | 100   | 85           |
| S26    | 12   | 13       | Chr                |                  |                  | 23.82                          | 16.03 |       | 12.84 |       |                   |                  |                               |                 |       |    |                               | 47.32                          |      |     |      |                                |                  |                                |                  |                  |                 |     | 100   | 112          |
| S26    | 12   | 14       | Feohy +            | 8.50             |                  | 2.26                           | 87.19 |       | 0.84  |       |                   |                  | 1.22                          |                 |       |    |                               |                                |      |     |      |                                |                  |                                |                  |                  |                 |     | 100   | 79           |
| S26    | 12   | 15       | Ep                 | 40.30            |                  | 24.40                          | 9.69  |       |       | 22.61 |                   |                  |                               |                 |       |    |                               |                                |      |     |      |                                |                  |                                |                  |                  |                 |     | 97    | 112          |
| S26    | 12   | 16       | "Chr"              | 1.88             |                  | 2.99                           | 58.70 | 1.98  | 2.35  |       |                   |                  |                               |                 |       |    |                               | 31.45                          |      |     | 0.66 |                                |                  |                                |                  |                  |                 |     | 100   | 100          |



Table B14.1: Mineral chemical analyses of sample S26.

| Sample | Site | Position | Mineral       | SiO2  | TiO2 | Al2O3 | FeO   | MnO  | MgO   | CaO   | Na2O | K2O  | P2O5  | SO3   | F     | Cl | V2O5 | Cr2O3 | NiO | CuO  | ZnO  | As2O3 | ZrO2 | Nb2O5 | SnO2 | HfO2 | WO3   | PbO | Total | Actual Total |
|--------|------|----------|---------------|-------|------|-------|-------|------|-------|-------|------|------|-------|-------|-------|----|------|-------|-----|------|------|-------|------|-------|------|------|-------|-----|-------|--------------|
| S26    | 12   | 17       | Spl           |       |      | 33.90 | 16.05 |      | 14.60 |       |      |      |       |       |       |    |      | 35.46 |     |      |      |       |      |       |      |      |       |     | 100   | 110          |
| S26    | 12   | 18       | Feohy +       | 3.49  |      | 2.17  | 89.17 |      | 0.77  | 0.48  |      |      | 1.49  |       |       |    |      |       |     |      |      |       |      |       |      |      | 2.43  |     | 100   | 75           |
| S26    | 12   | 19       | Mix           | 14.14 |      | 8.20  | 65.01 |      | 1.45  |       | 0.66 | 0.84 | 2.15  |       |       |    |      |       |     |      |      |       |      |       |      |      | 7.55  |     | 100   | 82           |
| S26    | 12   | 20       | Ep            | 40.87 |      | 23.59 | 10.51 |      |       | 21.19 | 0.83 |      |       |       |       |    |      |       |     |      |      |       |      |       |      |      |       |     | 97    | 113          |
| S26    | 12   | 21       | Chr           |       |      | 9.16  | 27.37 |      | 9.31  |       |      |      |       |       |       |    |      | 54.16 |     |      |      |       |      |       |      |      |       |     | 100   | 107          |
| S26    | 12   | 22       | Ep            | 39.88 |      | 22.97 | 11.81 |      |       | 22.34 |      |      |       |       |       |    |      |       |     |      |      |       |      |       |      |      |       |     | 97    | 110          |
| S26    | 12   | 23       | Feohy +       | 2.90  |      | 2.75  | 78.47 |      | 0.99  |       | 0.80 |      | 2.04  |       |       |    |      |       |     |      |      |       |      |       |      |      | 12.05 |     | 100   | 76           |
| S26    | 12   | 24       | Ap +          |       |      |       | 0.44  |      |       | 46.49 | 0.98 |      | 39.57 | 1.75  | 8.28  |    |      |       |     |      |      |       |      |       |      |      | 2.50  |     | 100   | 110          |
| S26    | 12   | 25       | Ep            | 48.36 |      | 24.26 | 4.47  |      | 0.45  | 19.46 |      |      |       |       |       |    |      |       |     |      |      |       |      |       |      |      |       |     | 97    | 111          |
| S26    | 12   | 26       | Feohy +       | 3.76  |      | 1.14  | 93.55 |      |       | 0.61  |      |      | 0.95  |       |       |    |      |       |     |      |      |       |      |       |      |      |       |     | 100   | 82           |
| S26    | 12   | 27       | Feohy         |       |      |       | 92.78 |      | 2.18  | 1.26  |      |      | 1.90  | 1.88  |       |    |      |       |     |      |      |       |      |       |      |      |       |     | 100   | 69           |
| S26    | 12   | 28       | Grt           | 38.98 |      | 2.63  | 24.54 |      |       | 33.85 |      |      |       |       |       |    |      |       |     |      |      |       |      |       |      |      |       |     | 100   | 101          |
| S26    | 12   | 29       | Feohy +       | 4.64  |      | 0.93  | 94.43 |      |       |       |      |      |       |       |       |    |      |       |     |      |      |       |      |       |      |      |       |     | 100   | 73           |
| S26    | 12   | 30       | Cpx           | 55.72 |      | 1.33  | 2.75  |      | 17.90 | 21.61 |      |      |       |       |       |    |      | 0.69  |     |      |      |       |      |       |      |      |       |     | 100   | 112          |
| S26    | 12   | 31       | Chr           |       |      | 11.94 | 19.52 |      | 9.44  |       |      |      |       |       |       |    |      | 59.10 |     |      |      |       |      |       |      |      |       |     | 100   | 102          |
| S26    | 12   | 32       | Ep            | 42.52 |      | 25.20 | 7.25  |      |       | 22.04 |      |      |       |       |       |    |      |       |     |      |      |       |      |       |      |      |       |     | 97    | 102          |
| S26    | 12   | 33       | Ap +          |       |      |       | 0.35  |      |       | 47.42 | 0.82 |      | 39.18 | 1.33  | 8.28  |    |      |       |     |      |      |       |      |       |      |      | 2.63  |     | 100   | 105          |
| S26    | 12   | 34       | Feohy +       | 7.71  |      | 3.74  | 86.13 |      |       | 0.55  |      |      | 1.48  |       |       |    |      | 0.39  |     |      |      |       |      |       |      |      |       |     | 100   | 74           |
| S26    | 12   | 35       | Feohy +       | 8.50  |      | 3.81  | 83.32 |      |       |       |      |      |       |       |       |    |      |       |     |      |      |       |      |       |      |      | 4.37  |     | 100   | 64           |
| S26    | 12   | 36       | Feohy +       | 5.65  |      | 1.26  | 86.47 |      |       |       |      |      |       |       |       |    |      |       |     |      | 2.38 |       |      |       |      |      | 4.24  |     | 100   | 76           |
| S26    | 12   | 37       | Spl           |       | 0.34 | 30.67 | 22.15 |      | 13.07 |       |      |      |       |       |       |    |      | 33.77 |     |      |      |       |      |       |      |      |       |     | 100   | 102          |
| S26    | 12   | 38       | Cal           |       |      |       |       |      | 0.31  | 27.15 |      |      |       |       | 28.54 |    |      |       |     |      |      |       |      |       |      |      |       |     | 56    | 118          |
| S26    | 12   | 39       | Feohy +       | 4.19  |      | 1.82  | 93.21 |      |       |       |      |      |       |       |       |    |      |       |     | 0.77 |      |       |      |       |      |      |       |     | 100   | 73           |
| S26    | 12   | 40       | Chr           |       |      | 19.96 | 33.15 |      | 7.86  |       |      |      |       |       |       |    |      | 39.02 |     |      |      |       |      |       |      |      |       |     | 100   | 105          |
| S26    | 12   | 41       | Feohy +       | 3.14  |      | 1.78  | 89.87 | 1.28 |       | 0.52  |      |      | 0.91  |       |       |    |      |       |     |      |      |       |      |       |      |      | 2.51  |     | 100   | 86           |
| S26    | 12.1 | 1        | Feohy + Chl + | 6.01  |      | 4.39  | 80.09 | 0.81 | 1.02  | 0.48  |      |      | 2.15  |       |       |    |      |       |     |      |      |       |      |       |      |      | 5.05  |     | 100   | 72           |
| S26    | 12.1 | 2        | Feohy + Chl + | 6.98  |      | 5.32  | 78.10 |      | 1.15  | 0.73  |      |      | 2.04  |       |       |    |      | 0.80  |     |      |      |       |      |       |      |      | 4.87  |     | 100   | 44           |
| S26    | 12.1 | 3        | Feohy + Chl + | 13.18 |      | 8.10  | 68.28 | 0.79 | 1.56  | 0.53  |      | 0.36 | 2.04  |       |       |    |      |       |     |      |      |       |      |       |      |      | 5.16  |     | 100   | 61           |
| S26    | 12.2 | 1        | Feohy +       | 5.89  |      | 2.18  | 86.86 |      |       | 0.36  |      |      | 1.69  |       |       |    | 0.49 |       |     |      | 2.53 |       |      |       |      |      |       |     | 100   | 79           |
| S26    | 12.2 | 2        | Qz            | 98.89 |      |       | 1.11  |      |       |       |      |      |       |       |       |    |      |       |     |      |      |       |      |       |      |      |       |     | 100   | 123          |
| S26    | 12.2 | 3        | Feohy +       | 24.35 |      | 2.33  | 67.58 |      | 0.65  |       |      |      | 1.51  |       |       |    | 0.72 |       |     | 1.02 | 1.84 |       |      |       |      |      |       |     | 100   | 87           |
| S26    | 12.2 | 4        | Qz +          | 91.57 |      | 1.53  | 6.60  |      |       |       |      | 0.30 |       |       |       |    |      |       |     |      |      |       |      |       |      |      |       |     | 100   | 109          |
| S26    | 12.2 | 5        | Feohy +       | 9.22  |      | 2.89  | 82.01 |      |       | 0.43  |      |      | 2.44  |       |       |    | 0.76 |       |     |      | 2.24 |       |      |       |      |      |       |     | 100   | 80           |
| S26    | 13   | 1        | Spl           |       | 0.58 | 30.30 | 18.88 |      | 14.36 |       |      |      |       |       |       |    |      | 35.88 |     |      |      |       |      |       |      |      |       |     | 100   | 108          |
| S26    | 13   | 2        | Feohy         |       |      | 0.61  | 99.39 |      |       |       |      |      |       |       |       |    |      |       |     |      |      |       |      |       |      |      |       |     | 100   | 96           |
| S26    | 13   | 3        | Cpx           | 52.80 |      | 3.21  | 7.63  |      | 14.13 | 22.22 |      |      |       |       |       |    |      |       |     |      |      |       |      |       |      |      |       |     | 100   | 117          |
| S26    | 13   | 4        | Grt           | 39.66 |      | 20.89 | 32.21 | 0.98 |       | 3.75  | 2.52 |      |       |       |       |    |      |       |     |      |      |       |      |       |      |      |       |     | 100   | 117          |
| S26    | 13   | 5        | Amph          | 45.79 | 0.61 | 12.97 | 12.04 |      | 13.34 | 9.94  | 1.92 | 0.39 |       |       |       |    |      |       |     |      |      |       |      |       |      |      |       |     | 97    | 117          |
| S26    | 13   | 6        | Ep            | 40.53 |      | 30.34 | 2.71  |      |       | 22.68 |      |      |       |       | 0.75  |    |      |       |     |      |      |       |      |       |      |      |       |     | 97    | 119          |
| S26    | 13   | 7        | Feohy +       | 4.01  |      | 1.31  | 90.86 |      |       | 0.56  |      |      | 0.98  |       |       |    |      | 0.36  |     | 1.92 |      |       |      |       |      |      |       |     | 100   | 89           |
| S26    | 13   | 8        | Chr           |       | 0.82 | 8.19  | 31.53 |      | 5.74  |       |      |      |       |       |       |    |      | 53.72 |     |      |      |       |      |       |      |      |       |     | 100   | 112          |
| S26    | 13   | 9        | Chr           |       |      | 28.07 | 24.86 |      | 12.00 |       |      |      |       |       |       |    |      | 35.07 |     |      |      |       |      |       |      |      |       |     | 100   | 110          |
| S26    | 13   | 10       | Cpx           | 53.33 |      | 3.39  | 4.79  |      | 18.57 | 17.02 | 0.61 |      |       |       |       |    |      | 0.49  |     |      |      |       |      |       |      |      | 1.80  |     | 100   | 115          |
| S26    | 13   | 11       | Feohy +       | 5.16  |      |       | 93.99 |      |       | 0.45  |      |      |       |       |       |    |      | 0.40  |     |      |      |       |      |       |      |      |       |     | 100   | 84           |
| S26    | 13   | 12       | Qz +          | 91.17 |      | 4.92  | 1.18  |      | 0.63  |       |      | 2.10 |       |       |       |    |      |       |     |      |      |       |      |       |      |      |       |     | 100   | 121          |
| S26    | 13   | 13       | Zrn           | 31.17 |      |       |       |      |       |       |      |      |       |       |       |    |      |       |     |      |      | 67.46 |      |       |      | 1.38 |       |     | 100   | 129          |
| S26    | 13   | 14       | Chr +         | 3.96  |      | 23.83 | 33.01 |      | 10.20 |       |      |      |       |       |       |    |      | 29.01 |     |      |      |       |      |       |      |      |       |     | 100   | 102          |
| S26    | 13   | 15       | Feohy         |       |      |       | 99.41 |      |       |       |      |      |       |       |       |    |      | 0.59  |     |      |      |       |      |       |      |      |       |     | 100   | 95           |
| S26    | 13   | 16       | Feohy         | 5.19  |      | 1.36  | 91.75 | 1.33 |       |       |      |      |       |       |       |    |      | 0.38  |     |      |      |       |      |       |      |      |       |     | 100   | 81           |
| S26    | 13   | 17       | Chr           |       |      | 19.23 | 18.40 |      | 11.90 |       |      |      |       |       |       |    | 0.46 | 50.01 |     |      |      |       |      |       |      |      |       |     | 100   | 108          |
| S26    | 13   | 18       | Grt           | 41.86 |      | 21.14 | 2.57  |      |       | 34.43 |      |      |       |       |       |    |      |       |     |      |      |       |      |       |      |      |       |     | 100   | 112          |
| S26    | 13   | 19       | Ep            | 40.81 |      | 29.83 | 0.61  |      | 1.22  | 22.51 |      |      |       |       | 2.02  |    |      |       |     |      |      |       |      |       |      |      |       |     | 97    | 108          |
| S26    | 13   | 20       | Ep            | 39.82 | 1.91 | 23.24 | 9.15  |      |       | 22.88 |      |      |       |       |       |    |      |       |     |      |      |       |      |       |      |      |       |     | 97    | 109          |
| S26    | 13   | 21       | Py +          | 3.28  |      | 1.39  | 34.25 |      |       | 2.76  | 0.82 |      |       | 54.78 |       |    |      |       |     |      |      |       |      |       |      |      | 2.72  |     | 100   | 137          |
| S26    | 13   | 22       | Feohy +       | 5.84  |      | 1.48  | 89.48 | 0.65 |       |       |      |      | 1.32  | 1.22  |       |    |      |       |     |      |      |       |      |       |      |      |       |     | 100   | 75           |

Table B14.1: Mineral chemical analyses of sample S26.

| Sample | Site | Position | Mineral       | SiO2   | TiO2   | Al2O3 | FeO    | MnO  | MgO   | CaO   | Na2O | K2O  | P2O5 | SO3   | F     | Cl | V2O5 | Cr2O3 | NiO | CuO | ZnO  | As2O3 | ZrO2  | Nb2O5 | SnO2 | HfO2 | WO3  | PbO | Total | Actual Total |
|--------|------|----------|---------------|--------|--------|-------|--------|------|-------|-------|------|------|------|-------|-------|----|------|-------|-----|-----|------|-------|-------|-------|------|------|------|-----|-------|--------------|
| S26    | 13   | 23       | Cpx           | 55.59  |        | 3.22  | 6.23   |      | 17.89 | 16.46 | 0.60 |      |      |       |       |    |      |       |     |     |      |       |       |       |      |      |      |     | 100   | 109          |
| S26    | 13   | 24       | Feohy +       | 8.71   |        | 3.64  | 85.39  |      | 0.92  |       |      | 0.41 | 0.93 |       |       |    |      |       |     |     |      |       |       |       |      |      |      |     | 100   | 76           |
| S26    | 13   | 25       | Ep            | 40.03  |        | 21.56 | 13.05  | 0.57 |       | 21.79 |      |      |      |       |       |    |      |       |     |     |      |       |       |       |      |      |      |     | 97    | 105          |
| S26    | 13   | 26       | Feohy +       | 4.15   |        | 0.92  | 94.46  |      |       | 0.47  |      |      |      |       |       |    |      |       |     |     |      |       |       |       |      |      |      |     | 100   | 74           |
| S26    | 13   | 27       | Amph          | 54.57  |        | 2.75  | 10.31  | 0.43 | 19.33 | 8.59  | 0.38 |      |      |       |       |    |      | 0.65  |     |     |      |       |       |       |      |      |      |     | 97    | 92           |
| S26    | 13   | 28       | TiO2 +        | 1.22   | 96.06  |       | 0.86   |      |       | 1.85  |      |      |      |       |       |    |      |       |     |     |      |       |       |       |      |      |      |     | 100   | 103          |
| S26    | 13   | 29       | Qz            | 100.00 |        |       |        |      |       |       |      |      |      |       |       |    |      |       |     |     |      |       |       |       |      |      |      |     | 100   | 116          |
| S26    | 13   | 30       | Qz            | 99.65  |        |       | 0.35   |      |       |       |      |      |      |       |       |    |      |       |     |     |      |       |       |       |      |      |      |     | 100   | 121          |
| S26    | 13   | 31       | TiO2          |        | 99.44  |       | 0.56   |      |       |       |      |      |      |       |       |    |      |       |     |     |      |       |       |       |      |      |      |     | 100   | 106          |
| S26    | 13   | 32       | Feohy +       | 9.27   |        | 4.99  | 83.34  |      | 0.83  | 0.64  |      |      | 0.93 |       |       |    |      |       |     |     |      |       |       |       |      |      |      |     | 100   | 78           |
| S26    | 13   | 33       | Opx           | 54.06  |        | 1.27  | 22.10  | 0.70 | 21.43 | 0.43  |      |      |      |       |       |    |      |       |     |     |      |       |       |       |      |      |      |     | 100   | 116          |
| S26    | 13   | 34       | Ep            | 40.33  |        | 27.20 | 6.67   |      |       | 22.80 |      |      |      |       |       |    |      |       |     |     |      |       |       |       |      |      |      |     | 97    | 106          |
| S26    | 13   | 35       | Feohy +       | 4.91   | 1.09   | 1.17  | 92.82  |      |       |       |      |      |      |       |       |    |      |       |     |     |      |       |       |       |      |      |      |     | 100   | 84           |
| S26    | 13   | 36       | Feohy +       | 6.11   |        | 1.19  | 91.18  |      |       |       |      |      | 1.53 |       |       |    |      |       |     |     |      |       |       |       |      |      |      |     | 100   | 77           |
| S26    | 13.1 | 1        | Qz            | 99.73  | 0.27   |       |        |      |       |       |      |      |      |       |       |    |      |       |     |     |      |       |       |       |      |      |      |     | 100   | 121          |
| S26    | 13.1 | 2        | TiO2 +        | 3.06   | 86.94  | 0.83  | 5.68   |      |       |       |      |      |      |       |       |    |      |       |     |     |      |       |       |       |      |      | 3.50 |     | 100   | 105          |
| S26    | 13.1 | 3        | Qz + TiO2     | 47.98  | 49.33  |       | 2.43   |      |       |       |      |      |      |       |       |    |      |       |     |     |      |       |       |       |      |      | 0.26 |     | 100   | 110          |
| S26    | 13.1 | 4        | TiO2 +        | 1.77   | 95.21  | 0.83  | 2.18   |      |       |       |      |      |      |       |       |    |      |       |     |     |      |       |       |       |      |      |      |     | 100   | 107          |
| S26    | 13.1 | 5        | Qz + TiO2 +   | 52.03  | 36.34  | 1.59  | 1.65   |      |       |       | 0.53 |      |      |       |       |    |      |       |     |     |      |       | 7.86  |       |      |      |      |     | 100   | 112          |
| S26    | 13.1 | 6        | Clay          | 61.04  | 1.08   | 25.29 | 2.59   |      | 3.29  | 0.45  | 1.36 | 1.29 |      |       | 3.61  |    |      |       |     |     |      |       |       |       |      |      |      |     | 100   | 102          |
| S26    | 14   | 1        | Feohy         |        |        |       | 100.00 |      |       |       |      |      |      |       |       |    |      |       |     |     |      |       |       |       |      |      |      |     | 100   | 94           |
| S26    | 14   | 2        | Ep +          | 40.01  |        | 20.28 | 14.98  | 6.65 | 0.38  | 17.69 |      |      |      |       |       |    |      |       |     |     |      |       |       |       |      |      |      |     | 100   | 112          |
| S26    | 14   | 3        | "Chr"         |        | 4.03   | 16.72 | 39.02  |      | 2.78  | 0.37  | 0.62 |      |      |       |       |    | 0.60 | 32.44 |     |     | 1.22 |       |       |       |      | 2.21 |      |     | 100   | 94           |
| S26    | 14   | 4        | Ep            | 39.72  |        | 23.57 | 11.07  | 0.33 |       | 22.32 |      |      |      |       |       |    |      |       |     |     |      |       |       |       |      |      |      |     | 97    | 107          |
| S26    | 14   | 5        | Qz            | 100.00 |        |       |        |      |       |       |      |      |      |       |       |    |      |       |     |     |      |       |       |       |      |      |      |     | 100   | 120          |
| S26    | 14   | 6        | Grt           | 39.74  |        | 21.03 | 26.82  | 2.17 | 1.04  | 9.20  |      |      |      |       |       |    |      |       |     |     |      |       |       |       |      |      |      |     | 100   | 113          |
| S26    | 14   | 7        | Ep            | 39.86  |        | 21.02 | 13.48  |      |       | 22.64 |      |      |      |       |       |    |      |       |     |     |      |       |       |       |      |      |      |     | 97    | 111          |
| S26    | 14   | 8        | TiO2 +        |        | 94.67  |       | 4.87   |      |       | 0.46  |      |      |      |       |       |    |      |       |     |     |      |       |       |       |      |      |      |     | 100   | 104          |
| S26    | 14   | 9        | TiO2          |        | 100.00 |       |        |      |       |       |      |      |      |       |       |    |      |       |     |     |      |       |       |       |      |      |      |     | 100   | 112          |
| S26    | 14   | 10       | Ep            | 41.31  |        | 23.07 | 7.28   |      | 2.19  | 23.15 |      |      |      |       |       |    |      |       |     |     |      |       |       |       |      |      |      |     | 97    | 101          |
| S26    | 14   | 11       | Zrn           | 31.12  |        |       |        |      |       |       |      |      |      |       |       |    |      |       |     |     |      |       | 68.88 |       |      |      |      |     | 100   | 124          |
| S26    | 14   | 12       | Chr           |        |        | 26.83 | 15.94  |      | 14.08 |       |      |      |      |       |       |    |      | 43.16 |     |     |      |       |       |       |      |      |      |     | 100   | 115          |
| S26    | 14   | 13       | Feohy +       | 5.61   |        | 1.77  | 91.46  |      | 0.73  | 0.43  |      |      |      |       |       |    |      |       |     |     |      |       |       |       |      |      |      |     | 100   | 79           |
| S26    | 14   | 14       | Cpx           | 55.23  |        | 1.07  | 5.06   | 0.31 | 15.76 | 22.56 |      |      |      |       |       |    |      |       |     |     |      |       |       |       |      |      |      |     | 100   | 118          |
| S26    | 14   | 15       | Ttn           | 32.66  | 38.43  | 0.57  | 0.79   |      |       | 27.55 |      |      |      |       |       |    |      |       |     |     |      |       |       |       |      |      |      |     | 100   | 109          |
| S26    | 14   | 16       | Tur           | 38.23  | 0.82   | 32.05 | 4.63   |      | 8.26  | 0.99  | 2.03 |      |      |       |       |    |      |       |     |     |      |       |       |       |      |      |      |     | 87    | 98           |
| S26    | 14   | 17       | St            | 30.55  | 0.58   | 55.84 | 11.13  | 0.29 | 1.05  |       |      |      |      |       |       |    |      |       |     |     | 0.56 |       |       |       |      |      |      |     | 100   | 108          |
| S26    | 14   | 18       | Feohy +       | 4.07   |        | 0.80  | 93.44  | 0.53 |       |       |      |      |      |       |       |    | 1.15 |       |     |     |      |       |       |       |      |      |      |     | 100   | 77           |
| S26    | 14   | 19       | Ep            | 40.03  |        | 22.85 | 11.83  |      |       | 22.29 |      |      |      |       |       |    |      |       |     |     |      |       |       |       |      |      |      |     | 97    | 108          |
| S26    | 14   | 20       | Feohy +       | 6.46   |        | 1.93  | 85.67  |      |       | 0.45  |      |      | 1.66 |       |       |    |      |       |     |     |      |       |       |       |      |      | 3.83 |     | 100   | 75           |
| S26    | 14   | 21       | Feohy +       | 7.56   |        |       | 87.61  |      | 1.14  | 0.37  |      |      | 1.37 |       |       |    |      | 0.48  |     |     | 1.48 |       |       |       |      |      |      |     | 100   | 81           |
| S26    | 14   | 22       | Py +          | 1.22   |        |       | 41.64  |      |       |       | 0.81 |      | 0.96 | 50.52 |       |    |      |       |     |     |      |       |       |       |      |      | 4.85 |     | 100   | 152          |
| S26    | 14   | 23       | Feohy + Chl + | 13.55  |        | 7.70  | 73.39  | 0.84 | 0.66  | 0.99  |      | 0.61 | 2.26 |       |       |    |      |       |     |     |      |       |       |       |      |      |      |     | 100   | 70           |
| S26    | 14   | 24       | Cal           |        |        |       | 0.31   | 0.50 | 0.50  | 29.66 |      |      |      |       | 25.02 |    |      |       |     |     |      |       |       |       |      |      |      |     | 56    | 107          |
| S26    | 14   | 25       | "Chr"         | 3.62   | 1.69   | 0.72  | 56.11  | 1.20 | 4.44  |       |      |      |      |       |       |    |      | 32.20 |     |     |      |       |       |       |      |      |      |     | 100   | 102          |
| S26    | 14   | 26       | Ilm +         | 8.92   | 50.15  |       | 32.11  | 2.68 |       | 6.15  |      |      |      |       |       |    |      |       |     |     |      |       |       |       |      |      |      |     | 100   | 110          |
| S26    | 14   | 27       | Feohy + Chl   | 9.86   |        | 4.72  | 75.85  |      | 0.86  | 0.53  |      |      | 1.04 |       |       |    |      |       |     |     |      |       |       |       |      |      | 7.14 |     | 100   | 73           |
| S26    | 14   | 28       | Ttn           | 30.55  | 41.79  | 0.75  | 0.72   |      |       | 26.19 |      |      |      |       |       |    |      |       |     |     |      |       |       |       |      |      |      |     | 100   | 105          |
| S26    | 14   | 29       | Feohy +       | 1.47   |        |       | 89.05  | 0.54 | 0.82  | 0.51  |      |      | 0.99 |       |       |    |      |       |     |     |      |       |       |       |      |      | 6.61 |     | 100   | 74           |
| S26    | 14   | 30       | Feohy         |        |        |       | 100.00 |      |       |       |      |      |      |       |       |    |      |       |     |     |      |       |       |       |      |      |      |     | 100   | 84           |
| S26    | 14   | 31       | Ttn +         | 22.38  | 57.12  | 0.74  | 0.92   |      |       | 18.84 |      |      |      |       |       |    |      |       |     |     |      |       |       |       |      |      |      |     | 100   | 107          |
| S26    | 14   | 32       | Tur           | 38.56  | 0.69   | 31.89 | 4.25   |      | 8.45  | 0.61  | 2.56 |      |      |       |       |    |      |       |     |     |      |       |       |       |      |      |      |     | 87    | 99           |
| S26    | 14   | 33       | Ep            | 40.94  |        | 26.41 | 7.22   |      |       | 22.43 |      |      |      |       |       |    |      |       |     |     |      |       |       |       |      |      |      |     | 97    | 103          |
| S26    | 14   | 34       | Tur           | 38.19  | 0.73   | 31.45 | 4.63   |      | 8.86  | 1.02  | 2.12 |      |      |       |       |    |      |       |     |     |      |       |       |       |      |      |      |     | 87    | 95           |
| S26    | 14   | 35       | Ep            | 40.32  |        | 23.69 | 10.97  |      |       | 22.02 |      |      |      |       |       |    |      |       |     |     |      |       |       |       |      |      |      |     | 97    | 106          |

Table B14.1: Mineral chemical analyses of sample S26.

| Sample | Site | Position | Mineral                 | SiO2   | TiO2  | Al2O3 | FeO   | MnO  | MgO   | CaO   | Na2O  | K2O   | P2O5  | SO3   | F    | Cl | V2O5 | Cr2O3 | NiO | CuO | ZnO | As2O3 | ZrO2  | Nb2O5 | SnO2 | HfO2 | WO3  | PbO | Total | Actual Total |
|--------|------|----------|-------------------------|--------|-------|-------|-------|------|-------|-------|-------|-------|-------|-------|------|----|------|-------|-----|-----|-----|-------|-------|-------|------|------|------|-----|-------|--------------|
| S26    | 14   | 36       | Chr                     |        |       | 22.09 | 21.24 |      | 10.17 |       |       |       |       |       |      |    |      | 46.50 |     |     |     |       |       |       |      |      |      |     | 100   | 103          |
| S26    | 14   | 37       | Ttn +                   | 27.80  | 45.95 | 1.42  | 0.90  |      |       | 23.93 |       |       |       |       |      |    |      |       |     |     |     |       |       |       |      |      |      |     | 100   | 105          |
| S26    | 14   | 38       | Feohy +                 | 2.97   |       | 1.02  | 92.96 |      |       | 0.41  |       |       |       |       |      |    |      |       |     |     |     |       |       |       |      |      | 2.64 |     | 100   | 71           |
| S26    | 14   | 39       | Grt                     | 40.73  | 0.40  | 3.66  | 23.37 |      |       | 31.84 |       |       |       |       |      |    |      |       |     |     |     |       |       |       |      |      |      |     | 100   | 95           |
| S26    | 14.1 | 1        | Feohy +                 | 4.64   |       | 0.81  | 92.91 | 1.31 |       | 0.33  |       |       |       |       |      |    |      |       |     |     |     |       |       |       |      |      |      |     | 100   | 82           |
| S26    | 14.1 | 2        | Qz + Chl                | 66.63  |       | 13.62 | 11.41 |      | 3.57  |       | 0.52  | 4.25  |       |       |      |    |      |       |     |     |     |       |       |       |      |      |      |     | 100   | 99           |
| S26    | 14.1 | 3        | Ttn                     | 32.93  | 37.38 | 1.04  | 0.69  |      |       | 27.96 |       |       |       |       |      |    |      |       |     |     |     |       |       |       |      |      |      |     | 100   | 111          |
| S26    | 14.1 | 4        | Ab                      | 69.19  |       | 18.77 | 0.36  |      |       |       | 11.68 |       |       |       |      |    |      |       |     |     |     |       |       |       |      |      |      |     | 100   | 116          |
| S26    | 14.1 | 5        | Zrn +                   | 31.11  | 7.06  |       | 0.90  |      |       | 5.71  |       |       |       |       |      |    |      |       |     |     |     |       | 53.92 |       |      | 1.32 |      |     | 100   | 119          |
| S26    | 14.1 | 6        | Chl                     | 28.27  | 0.31  | 15.80 | 21.61 | 0.35 | 12.84 | 0.35  | 0.76  | 1.42  |       | 3.29  |      |    |      |       |     |     |     |       |       |       |      |      |      |     | 85    | 100          |
| S26    | 14.1 | 7        | Ilm                     |        | 52.88 |       | 40.64 | 5.76 |       | 0.72  |       |       |       |       |      |    |      |       |     |     |     |       |       |       |      |      |      |     | 100   | 105          |
| S26    | 15   | 1        | Py +                    | 1.70   |       | 0.81  | 47.60 | 0.33 |       | 0.34  | 3.96  |       |       | 45.26 |      |    |      |       |     |     |     |       |       |       |      |      |      |     | 100   | 126          |
| S26    | 15   | 2        | Qz                      | 100.00 |       |       |       |      |       |       |       |       |       |       |      |    |      |       |     |     |     |       |       |       |      |      |      |     | 100   | 116          |
| S26    | 15   | 3        | Ttn                     | 32.65  | 36.42 | 1.07  | 2.04  |      |       | 27.81 |       |       |       |       |      |    |      |       |     |     |     |       |       |       |      |      |      |     | 100   | 107          |
| S26    | 15   | 4        | Ttn + Chl               | 29.58  | 31.35 | 5.11  | 11.93 | 1.23 | 2.73  | 17.60 | 0.46  |       |       |       |      |    |      |       |     |     |     |       |       |       |      |      |      |     | 100   | 100          |
| S26    | 15   | 5        | Ep                      | 40.60  |       | 31.35 | 1.46  |      |       | 23.58 |       |       |       |       |      |    |      |       |     |     |     |       |       |       |      |      |      |     | 97    | 106          |
| S26    | 15   | 6        | Feohy +                 | 4.28   |       | 3.70  | 89.55 | 0.84 |       | 0.46  |       |       | 1.17  |       |      |    |      |       |     |     |     |       |       |       |      |      |      |     | 100   | 79           |
| S26    | 15   | 7        | Feohy +                 | 1.55   |       | 5.65  | 80.85 |      | 1.18  | 0.37  |       |       | 2.66  |       |      |    |      | 1.06  |     |     |     |       |       |       |      |      | 6.69 |     | 100   | 75           |
| S26    | 15   | 8        | Grt                     | 39.79  |       | 20.68 | 28.94 | 0.50 | 1.42  | 8.66  |       |       |       |       |      |    |      |       |     |     |     |       |       |       |      |      |      |     | 100   | 115          |
| S26    | 15   | 9        | Ep                      | 39.87  |       | 22.78 | 11.72 |      |       | 22.64 |       |       |       |       |      |    |      |       |     |     |     |       |       |       |      |      |      |     | 97    | 111          |
| S26    | 15   | 10       | Ap                      |        |       |       |       |      |       | 49.43 |       |       | 45.21 |       | 5.37 |    |      |       |     |     |     |       |       |       |      |      |      |     | 100   | 126          |
| S26    | 15   | 11       | Ep                      | 40.25  |       | 31.24 | 1.43  |      |       | 22.95 |       |       |       |       | 1.13 |    |      |       |     |     |     |       |       |       |      |      |      |     | 97    | 120          |
| S26    | 15   | 12       | Feohy +                 | 2.67   |       | 1.61  | 93.76 |      |       | 0.48  |       |       | 1.49  |       |      |    |      |       |     |     |     |       |       |       |      |      |      |     | 100   | 88           |
| S26    | 15   | 13       | Feohy +                 | 3.46   |       | 2.32  | 92.46 | 0.70 |       | 0.60  |       |       |       |       |      |    |      | 0.45  |     |     |     |       |       |       |      |      |      |     | 100   | 84           |
| S26    | 15   | 14       | Zrn                     | 31.12  |       |       |       |      |       |       |       |       |       |       |      |    |      |       |     |     |     |       | 67.25 |       |      | 1.62 |      |     | 100   | 126          |
| S26    | 15   | 15       | Ep                      | 40.18  |       | 24.92 | 9.16  | 0.34 |       | 22.41 |       |       |       |       |      |    |      |       |     |     |     |       |       |       |      |      |      |     | 97    | 111          |
| S26    | 15   | 16       | Kfs                     | 66.19  |       | 17.56 |       |      |       |       | 0.67  | 15.58 |       |       |      |    |      |       |     |     |     |       |       |       |      |      |      |     | 100   | 116          |
| S26    | 15   | 17       | Qz + TiO <sub>2</sub> + | 67.86  | 28.35 | 1.44  | 0.91  |      | 0.87  |       |       | 0.58  |       |       |      |    |      |       |     |     |     |       |       |       |      |      |      |     | 100   | 109          |
| S26    | 15   | 18       | Grt                     | 39.85  |       | 21.01 | 25.06 | 4.03 | 1.23  | 8.81  |       |       |       |       |      |    |      |       |     |     |     |       |       |       |      |      |      |     | 100   | 108          |
| S26    | 15   | 19       | Amph                    | 51.93  | 0.31  | 5.80  | 5.12  |      | 20.02 | 11.21 | 2.00  | 0.21  |       |       |      |    |      | 0.40  |     |     |     |       |       |       |      |      |      |     | 97    | 111          |
| S26    | 15   | 20       | Feohy +                 | 7.80   |       | 3.89  | 81.56 |      | 0.82  | 0.43  |       |       | 1.90  |       |      |    |      | 0.45  |     |     |     |       |       |       |      |      | 3.15 |     | 100   | 75           |
| S26    | 15   | 21       | Py                      |        |       |       | 30.05 |      |       |       |       |       |       | 69.95 |      |    |      |       |     |     |     |       |       |       |      |      |      |     | 100   | 198          |
| S26    | 15   | 22       | Ep                      | 41.98  |       | 27.69 | 6.35  |      |       | 19.47 |       | 1.50  |       |       |      |    |      |       |     |     |     |       |       |       |      |      |      |     | 97    | 108          |
| S26    | 15   | 23       | Ap                      |        |       |       |       |      |       | 51.51 |       | 0.30  | 44.29 |       | 2.20 |    |      |       |     |     |     |       |       |       |      |      | 1.69 |     | 100   | 100          |
| S26    | 15   | 24       | TiO <sub>2</sub> +      | 1.26   | 88.31 | 1.27  | 8.32  | 0.43 |       | 0.42  |       |       |       |       |      |    |      |       |     |     |     |       |       |       |      |      |      |     | 100   | 100          |
| S26    | 15   | 25       | Ep                      | 43.30  |       | 21.25 | 11.50 |      |       | 20.94 |       |       |       |       |      |    |      |       |     |     |     |       |       |       |      |      |      |     | 97    | 111          |
| S26    | 15   | 26       | Zrn                     | 31.43  |       |       |       |      |       |       |       |       |       |       |      |    |      |       |     |     |     |       | 68.57 |       |      |      |      |     | 100   | 116          |
| S26    | 15   | 27       | Ep                      | 40.30  |       | 23.55 | 11.16 |      |       | 21.98 |       |       |       |       |      |    |      |       |     |     |     |       |       |       |      |      |      |     | 97    | 104          |
| S26    | 15   | 28       | Ep                      | 41.51  |       | 21.86 | 11.78 |      | 1.39  | 20.47 |       |       |       |       |      |    |      |       |     |     |     |       |       |       |      |      |      |     | 97    | 106          |
| S26    | 15   | 29       | Feohy +                 | 5.23   |       | 2.15  | 92.16 |      |       |       |       |       |       |       |      |    |      | 0.46  |     |     |     |       |       |       |      |      |      |     | 100   | 70           |
| S26    | 15   | 30       | Spl                     |        |       | 43.09 | 14.70 |      | 17.56 |       |       |       |       |       |      |    |      | 24.65 |     |     |     |       |       |       |      |      |      |     | 100   | 103          |
| S26    | 15   | 31       | Ep +                    | 39.53  | 6.87  | 19.93 | 9.64  |      |       | 24.03 |       |       |       |       |      |    |      |       |     |     |     |       |       |       |      |      |      |     | 100   | 102          |
| S26    | 15   | 32       | Feohy +                 | 3.39   |       | 1.18  | 94.41 |      |       |       |       |       | 1.03  |       |      |    |      |       |     |     |     |       |       |       |      |      |      |     | 100   | 80           |
| S26    | 15   | 33       | Ep                      | 40.32  |       | 25.58 | 8.62  |      |       | 22.48 |       |       |       |       |      |    |      |       |     |     |     |       |       |       |      |      |      |     | 97    | 102          |
| S26    | 15   | 34       | Ttn                     | 32.74  | 34.57 | 3.01  | 0.54  |      |       | 27.46 |       |       |       |       | 1.68 |    |      |       |     |     |     |       |       |       |      |      |      |     | 100   | 107          |
| S26    | 15   | 35       | Ilm                     |        | 55.20 |       | 42.17 | 2.62 |       |       |       |       |       |       |      |    |      |       |     |     |     |       |       |       |      |      |      |     | 100   | 101          |
| S26    | 16   | 1        | Ttn                     | 33.22  | 35.68 | 2.36  | 0.69  |      |       | 28.05 |       |       |       |       |      |    |      |       |     |     |     |       |       |       |      |      |      |     | 100   | 113          |
| S26    | 16   | 2        | Qz + TiO <sub>2</sub>   | 57.81  | 39.47 | 0.95  | 0.62  |      |       | 0.30  |       |       |       |       |      |    | 0.84 |       |     |     |     |       |       |       |      |      |      |     | 100   | 116          |
| S26    | 16   | 3        | Feohy +                 | 4.77   |       |       | 94.33 |      | 0.91  |       |       |       |       |       |      |    |      |       |     |     |     |       |       |       |      |      |      |     | 100   | 80           |
| S26    | 16   | 4        | St                      | 30.32  | 0.66  | 53.24 | 13.64 |      | 2.14  |       |       |       |       |       |      |    |      |       |     |     |     |       |       |       |      |      |      |     | 100   | 116          |
| S26    | 16   | 5        | Ep                      | 40.16  | 0.42  | 25.18 | 8.70  |      |       | 22.54 |       |       |       |       |      |    |      |       |     |     |     |       |       |       |      |      |      |     | 97    | 116          |
| S26    | 16   | 6        | Feohy +                 | 6.16   |       |       | 93.84 |      |       |       |       |       |       |       |      |    |      |       |     |     |     |       |       |       |      |      |      |     | 100   | 83           |
| S26    | 16   | 7        | Feohy +                 | 4.59   |       | 1.22  | 94.19 |      |       |       |       |       |       |       |      |    |      |       |     |     |     |       |       |       |      |      |      |     | 100   | 87           |
| S26    | 16   | 8        | Ep                      | 40.78  |       | 24.66 | 9.18  |      |       | 22.39 |       |       |       |       |      |    |      |       |     |     |     |       |       |       |      |      |      |     | 97    | 119          |
| S26    | 16   | 9        | Ep                      | 40.47  |       | 20.62 | 1.75  |      |       | 34.16 |       |       |       |       |      |    |      |       |     |     |     |       |       |       |      |      |      |     | 97    | 122          |

Table B14.1: Mineral chemical analyses of sample S26.

| Sample | Site | Position | Mineral            | SiO2   | TiO2  | Al2O3 | FeO   | MnO   | MgO   | CaO   | Na2O | K2O  | P2O5  | SO3   | F     | Cl   | V2O5 | Cr2O3 | NiO  | CuO | ZnO  | As2O3 | ZrO2 | Nb2O5 | SnO2 | HfO2 | WO3  | PbO | Total | Actual Total |
|--------|------|----------|--------------------|--------|-------|-------|-------|-------|-------|-------|------|------|-------|-------|-------|------|------|-------|------|-----|------|-------|------|-------|------|------|------|-----|-------|--------------|
| S26    | 16   | 10       | Ep                 | 40.23  |       | 24.79 | 9.80  | 0.48  |       | 21.71 |      |      |       |       |       |      |      |       |      |     |      |       |      |       |      |      |      | 97  | 111   |              |
| S26    | 16   | 11       | Feohy +            | 4.95   |       | 0.85  | 94.19 |       |       |       |      |      |       |       |       |      |      |       |      |     |      |       |      |       |      |      |      | 100 | 82    |              |
| S26    | 16   | 12       | Ep                 | 41.56  |       | 29.18 | 2.70  |       |       | 22.68 |      |      |       |       | 0.88  |      |      |       |      |     |      |       |      |       |      |      |      | 97  | 103   |              |
| S26    | 16   | 13       | St                 | 29.66  | 0.51  | 53.11 | 13.65 | 0.32  | 2.75  |       |      |      |       |       |       |      |      |       |      |     |      |       |      |       |      |      |      | 100 | 114   |              |
| S26    | 16   | 14       | Feohy +            | 3.60   |       | 1.92  | 89.57 |       | 0.99  | 0.39  |      |      | 1.17  |       |       |      |      |       |      |     |      |       |      |       |      |      | 2.37 | 100 | 82    |              |
| S26    | 16   | 15       | Feohy +            | 3.57   |       | 3.95  | 83.45 |       |       | 0.56  | 1.02 |      | 1.77  |       |       |      |      | 0.50  |      |     |      |       |      |       |      | 5.17 |      | 100 | 88    |              |
| S26    | 16   | 16       | Grt                | 41.24  | 0.69  | 20.53 | 2.93  |       |       | 34.61 |      |      |       |       |       |      |      |       |      |     |      |       |      |       |      |      |      | 100 | 116   |              |
| S26    | 16   | 17       | Ilm                |        | 53.99 |       | 42.39 | 3.62  |       |       |      |      |       |       |       |      |      |       |      |     |      |       |      |       |      |      |      | 100 | 108   |              |
| S26    | 16   | 18       | Ilm                |        | 52.64 |       | 43.51 | 3.85  |       |       |      |      |       |       |       |      |      |       |      |     |      |       |      |       |      |      |      | 100 | 106   |              |
| S26    | 16   | 19       | Ep +               | 44.96  |       | 22.62 | 10.36 | 0.32  |       | 19.94 | 1.81 |      |       |       |       |      |      |       |      |     |      |       |      |       |      |      |      | 100 | 106   |              |
| S26    | 16   | 20       | Ep +               | 47.56  |       | 24.04 | 3.55  |       | 1.94  | 16.57 | 2.29 |      |       |       | 4.05  |      |      |       |      |     |      |       |      |       |      |      |      | 100 | 91    |              |
| S26    | 16   | 21       | Amph               | 48.34  | 0.63  | 10.28 | 10.95 |       | 13.78 | 11.29 | 1.73 |      |       |       |       |      |      |       |      |     |      |       |      |       |      |      |      | 97  | 113   |              |
| S26    | 16   | 22       | Ap +               |        |       |       | 0.43  |       |       | 50.07 | 0.90 |      | 38.39 | 1.44  | 8.77  |      |      |       |      |     |      |       |      |       |      |      |      | 100 | 112   |              |
| S26    | 16   | 23       | Qz                 | 100.00 |       |       |       |       |       |       |      |      |       |       |       |      |      |       |      |     |      |       |      |       |      |      |      | 100 | 122   |              |
| S26    | 16   | 24       | Feohy +            | 4.95   |       | 1.17  | 93.39 | 0.49  |       |       |      |      |       |       |       |      |      |       |      |     |      |       |      |       |      |      |      | 100 | 83    |              |
| S26    | 16   | 25       | Py                 | 0.48   |       |       | 28.76 | 0.47  |       |       | 0.28 |      |       | 70.01 |       |      |      |       |      |     |      |       |      |       |      |      |      | 100 | 226   |              |
| S26    | 16   | 26       | Grt                | 41.62  |       | 18.84 | 4.78  |       |       | 34.77 |      |      |       |       |       |      |      |       |      |     |      |       |      |       |      |      |      | 100 | 115   |              |
| S26    | 16   | 27       | Ep                 | 41.94  |       | 19.85 | 13.78 |       |       | 20.73 | 0.71 |      |       |       |       |      |      |       |      |     |      |       |      |       |      |      |      | 97  | 110   |              |
| S26    | 16   | 28       | Feohy              |        |       |       | 93.05 |       | 1.20  |       |      |      | 1.39  |       |       |      |      |       |      |     |      |       |      |       |      | 4.36 |      | 100 | 71    |              |
| S26    | 16   | 29       | Ep +               | 52.85  |       | 22.39 | 5.66  |       |       | 19.09 |      |      |       |       |       |      |      |       |      |     |      |       |      |       |      |      |      | 100 | 107   |              |
| S26    | 16   | 30       | Ol                 | 42.42  |       |       | 7.84  |       | 49.74 |       |      |      |       |       |       |      |      |       |      |     |      |       |      |       |      |      |      | 100 | 114   |              |
| S26    | 16   | 31       | Feohy +            | 5.95   |       | 5.34  | 77.85 |       | 1.26  | 0.49  |      |      | 3.13  |       |       |      |      |       |      |     |      |       |      |       |      | 5.98 |      | 100 | 78    |              |
| S26    | 16   | 32       | Grt                | 39.99  |       | 20.57 | 27.78 | 0.84  | 0.82  | 9.99  |      |      |       |       |       |      |      |       |      |     |      |       |      |       |      |      |      | 100 | 109   |              |
| S26    | 16   | 33       | Ep                 | 40.29  |       | 25.73 | 8.13  | 0.31  |       | 22.53 |      |      |       |       |       |      |      |       |      |     |      |       |      |       |      |      |      | 97  | 100   |              |
| S26    | 16   | 34       | Spl                |        |       | 28.08 | 15.87 |       | 14.82 |       |      |      |       |       |       |      | 0.40 | 40.83 |      |     |      |       |      |       |      |      |      | 100 | 108   |              |
| S26    | 16   | 35       | "Ilm" +            | 8.01   | 73.68 | 7.40  | 6.84  |       | 4.08  |       |      |      |       |       |       |      |      |       |      |     |      |       |      |       |      |      |      | 100 | 105   |              |
| S26    | 17   | 1        | Amph               | 54.15  | 0.97  | 3.42  | 8.37  |       | 18.74 | 10.53 | 0.81 |      |       |       |       |      |      |       |      |     |      |       |      |       |      |      |      | 97  | 115   |              |
| S26    | 17   | 2        | Ep                 | 40.03  |       | 24.66 | 9.64  |       |       | 22.67 |      |      |       |       |       |      |      |       |      |     |      |       |      |       |      |      |      | 97  | 111   |              |
| S26    | 17   | 3        | Chr                |        |       | 14.43 | 18.51 |       | 12.45 | 0.23  |      |      |       |       |       |      |      | 54.39 |      |     |      |       |      |       |      |      |      | 100 | 110   |              |
| S26    | 17   | 4        | Grt                | 39.50  |       | 20.63 | 28.69 | 2.01  | 0.78  | 8.37  |      |      |       |       |       |      |      |       |      |     |      |       |      |       |      |      |      | 100 | 115   |              |
| S26    | 17   | 5        | Cpx                | 56.70  |       |       | 2.11  |       | 18.04 | 23.15 |      |      |       |       |       |      |      |       |      |     |      |       |      |       |      |      |      | 100 | 117   |              |
| S26    | 17   | 6        | Ttn +              | 31.14  | 37.12 | 2.99  | 1.06  |       | 0.36  | 25.83 |      |      |       |       | 1.50  |      |      |       |      |     |      |       |      |       |      |      |      | 100 | 113   |              |
| S26    | 17   | 7        | Ilm +              |        | 49.31 |       | 44.37 | 0.99  | 0.63  |       | 3.35 | 0.29 |       |       |       | 1.06 |      |       |      |     |      |       |      |       |      |      |      | 100 | 108   |              |
| S26    | 17   | 8        | Qz                 | 99.75  |       |       |       |       |       |       | 0.25 |      |       |       |       |      |      |       |      |     |      |       |      |       |      |      |      | 100 | 126   |              |
| S26    | 17   | 9        | TiO <sub>2</sub>   | 0.55   | 98.65 |       | 0.80  |       |       |       |      |      |       |       |       |      |      |       |      |     |      |       |      |       |      |      |      | 100 | 113   |              |
| S26    | 17   | 10       | Feohy +            | 5.77   |       | 1.35  | 92.03 |       |       |       |      |      |       |       |       |      |      |       |      |     | 0.85 |       |      |       |      |      |      | 100 | 84    |              |
| S26    | 17   | 11       | Spl                |        |       | 45.20 | 13.38 |       | 18.16 |       |      |      |       |       |       |      |      | 23.27 |      |     |      |       |      |       |      |      |      | 100 | 118   |              |
| S26    | 17   | 12       | Pl + Chl           | 63.16  |       | 16.52 | 3.26  |       | 2.23  | 14.48 | 0.36 |      |       |       |       |      |      |       |      |     |      |       |      |       |      |      |      | 100 | 121   |              |
| S26    | 17   | 13       | Feohy +            | 7.02   |       | 2.10  | 89.30 |       |       | 0.44  |      |      | 1.13  |       |       |      |      |       |      |     |      |       |      |       |      |      |      | 100 | 81    |              |
| S26    | 17   | 14       | Grt                | 37.80  |       | 19.73 | 8.40  | 28.61 |       | 2.92  |      |      |       |       | 2.54  |      |      |       |      |     |      |       |      |       |      |      |      | 100 | 119   |              |
| S26    | 17   | 15       | Cal +              | 21.50  |       | 0.73  | 0.61  |       | 0.44  | 41.09 | 0.48 |      |       |       | 35.15 |      |      |       |      |     |      |       |      |       |      |      |      | 100 | 119   |              |
| S26    | 17   | 16       | Feohy +            | 4.81   |       | 0.91  | 90.85 | 2.90  |       | 0.53  |      |      |       |       |       |      |      |       |      |     |      |       |      |       |      |      |      | 100 | 81    |              |
| S26    | 17   | 17       | Tur                | 37.23  | 1.24  | 29.47 | 7.89  |       | 7.79  | 1.84  | 1.54 |      |       |       |       |      |      |       |      |     |      |       |      |       |      |      |      | 87  | 101   |              |
| S26    | 17   | 18       | Chr +              | 2.53   | 0.40  | 2.92  | 28.86 |       | 4.76  |       |      |      |       |       |       |      |      | 60.52 |      |     |      |       |      |       |      |      |      | 100 | 107   |              |
| S26    | 17   | 19       | Ttn                | 32.77  | 38.52 | 0.81  |       |       |       | 27.91 |      |      |       |       |       |      |      |       |      |     |      |       |      |       |      |      |      | 100 | 113   |              |
| S26    | 17   | 20       | Py +               | 1.31   |       | 0.55  | 48.21 |       | 0.39  |       | 0.54 |      | 49.00 |       |       |      |      |       |      |     |      |       |      |       |      |      |      | 100 | 140   |              |
| S26    | 17   | 21       | TiO <sub>2</sub> + | 0.66   | 97.94 |       | 0.37  |       |       | 1.04  |      |      |       |       |       |      |      |       |      |     |      |       |      |       |      |      |      | 100 | 108   |              |
| S26    | 17   | 22       | Ep                 | 40.47  |       | 25.82 | 7.95  |       |       | 22.76 |      |      |       |       |       |      |      |       |      |     |      |       |      |       |      |      |      | 97  | 111   |              |
| S26    | 17   | 23       | Ep +               | 40.91  | 5.79  | 21.74 | 5.84  |       | 2.14  | 23.58 |      |      |       |       |       |      |      |       |      |     |      |       |      |       |      |      |      | 100 | 105   |              |
| S26    | 17   | 24       | Feohy +            | 17.58  |       | 5.17  | 73.34 |       | 0.99  | 0.50  |      |      | 2.42  |       |       |      |      |       |      |     |      |       |      |       |      |      |      | 100 | 82    |              |
| S26    | 17   | 25       | Ep                 | 40.30  |       | 24.34 | 10.00 | 1.17  |       | 21.18 |      |      |       |       |       |      |      |       |      |     |      |       |      |       |      |      |      | 97  | 106   |              |
| S26    | 17   | 26       | Tur                | 40.45  | 0.34  | 30.26 | 4.13  |       | 10.62 |       | 0.39 | 0.17 |       |       |       |      |      | 0.30  | 0.33 |     |      |       |      |       |      |      |      | 87  | 102   |              |
| S26    | 17   | 27       | Feohy +            | 3.88   |       | 0.77  | 94.19 | 1.16  |       |       |      |      |       |       |       |      |      |       |      |     |      |       |      |       |      |      |      | 100 | 80    |              |
| S26    | 17   | 28       | Feohy +            | 4.35   |       |       | 95.65 |       |       |       |      |      |       |       |       |      |      |       |      |     |      |       |      |       |      |      |      | 100 | 74    |              |
| S26    | 17   | 29       | Ttn                | 33.00  | 38.21 | 0.76  | 0.36  |       |       | 27.67 |      |      |       |       |       |      |      |       |      |     |      |       |      |       |      |      |      | 100 | 109   |              |

Table B14.1: Mineral chemical analyses of sample S26.

| Sample | Site | Position | Mineral     | SiO2   | TiO2   | Al2O3 | FeO   | MnO  | MgO   | CaO   | Na2O | K2O  | P2O5  | SO3  | F     | Cl | V2O5 | Cr2O3 | NiO | CuO  | ZnO   | As2O3 | ZrO2  | Nb2O5 | SnO2 | HfO2 | WO3  | PbO | Total | Actual Total |
|--------|------|----------|-------------|--------|--------|-------|-------|------|-------|-------|------|------|-------|------|-------|----|------|-------|-----|------|-------|-------|-------|-------|------|------|------|-----|-------|--------------|
| S26    | 17   | 30       | Grt         | 39.65  |        | 20.86 | 33.01 | 0.50 | 3.44  | 2.54  |      |      |       |      |       |    |      |       |     |      |       |       |       |       |      |      |      | 100 | 109   |              |
| S26    | 17   | 31       | Spl         |        |        | 51.87 | 11.82 |      | 19.61 |       |      |      |       |      |       |    |      | 16.70 |     |      |       |       |       |       |      |      |      | 100 | 105   |              |
| S26    | 17   | 32       | Feohy +     | 8.99   |        | 2.37  | 87.27 |      |       |       |      |      | 1.37  |      |       |    |      |       |     |      |       |       |       |       |      |      |      | 100 | 76    |              |
| S26    | 17   | 33       | Qz +        | 77.96  |        | 8.57  | 4.55  |      |       | 8.92  |      |      |       |      |       |    |      |       |     |      |       |       |       |       |      |      |      | 100 | 118   |              |
| S26    | 17   | 34       | "Ilm" +     | 1.36   | 81.23  | 0.93  | 16.48 |      |       |       |      |      |       |      |       |    |      |       |     |      |       |       |       |       |      |      |      | 100 | 85    |              |
| S26    | 17   | 35       | Grt         | 41.54  |        | 22.91 | 12.56 |      |       | 22.99 |      |      |       |      |       |    |      |       |     |      |       |       |       |       |      |      |      | 100 | 107   |              |
| S26    | 17   | 36       | Chr         |        |        | 8.31  | 21.94 |      | 8.72  |       |      |      |       |      |       |    |      | 61.03 |     |      |       |       |       |       |      |      |      | 100 | 106   |              |
| S26    | 17   | 37       | Ap          |        |        |       |       |      |       | 45.12 | 1.36 |      | 39.38 | 1.81 | 8.69  |    |      |       |     |      |       |       |       |       |      |      | 3.64 | 100 | 111   |              |
| S26    | 17.1 | 1        | Ti-Mag      |        | 23.91  |       | 74.99 |      |       |       |      |      |       |      |       |    | 1.11 |       |     |      |       |       |       |       |      |      |      | 100 | 99    |              |
| S26    | 17.1 | 2        | Ilm         |        | 50.43  |       | 47.86 | 0.41 | 1.30  |       |      |      |       |      |       |    |      |       |     |      |       |       |       |       |      |      |      | 100 | 107   |              |
| S26    | 17.1 | 3        | Ti-Mag      |        | 15.43  |       | 83.71 |      |       |       |      |      |       |      |       |    |      | 0.86  |     |      |       |       |       |       |      |      |      | 100 | 98    |              |
| S26    | 18   | 1        | TiO2        |        | 100.00 |       |       |      |       |       |      |      |       |      |       |    |      |       |     |      |       |       |       |       |      |      |      | 100 | 107   |              |
| S26    | 18   | 2        | Qz          | 100.00 |        |       |       |      |       |       |      |      |       |      |       |    |      |       |     |      |       |       |       |       |      |      |      | 100 | 120   |              |
| S26    | 18   | 3        | Ep          | 39.77  |        | 21.66 | 13.28 |      |       | 22.28 |      |      |       |      |       |    |      |       |     |      |       |       |       |       |      |      |      | 97  | 110   |              |
| S26    | 18   | 4        | Amph        | 47.20  | 1.13   | 11.14 | 10.34 | 0.45 | 14.71 | 9.55  | 2.47 |      |       |      |       |    |      |       |     |      |       |       |       |       |      |      |      | 97  | 104   |              |
| S26    | 18   | 5        | Feohy +     | 1.25   |        | 1.16  | 89.37 |      |       | 0.49  |      |      | 1.71  | 1.09 |       |    |      |       |     |      |       |       |       |       |      |      | 4.93 | 100 | 74    |              |
| S26    | 18   | 6        | St          | 29.03  |        | 44.41 | 20.59 |      | 5.97  |       |      |      |       |      |       |    |      |       |     |      |       |       |       |       |      |      |      | 100 | 106   |              |
| S26    | 18   | 7        | Feohy +     | 5.46   |        |       | 92.49 | 2.05 |       |       |      |      |       |      |       |    |      |       |     |      |       |       |       |       |      |      |      | 100 | 79    |              |
| S26    | 18   | 8        | Feohy + Chl | 14.91  |        | 8.18  | 63.86 |      | 1.40  | 0.47  |      | 1.30 | 2.49  |      |       |    |      |       |     |      | -0.22 |       |       |       |      |      | 7.60 | 100 | 51    |              |
| S26    | 18   | 9        | Feohy +     | 4.36   |        | 3.88  | 84.67 |      | 0.85  | 0.40  | 0.90 |      | 1.37  |      |       |    |      |       |     |      |       |       |       |       |      |      | 3.58 | 100 | 77    |              |
| S26    | 18   | 10       | Ap +        |        |        |       | 0.55  |      |       | 45.33 | 1.14 |      | 40.03 | 1.05 | 7.43  |    |      |       |     |      |       |       |       |       |      |      | 4.46 | 100 | 100   |              |
| S26    | 18   | 11       | Chr         |        |        | 29.47 | 13.53 |      | 15.83 |       |      |      |       |      |       |    |      | 41.17 |     |      |       |       |       |       |      |      |      | 100 | 115   |              |
| S26    | 18   | 12       | Chr         |        |        | 27.65 | 16.32 |      | 13.55 |       |      |      |       |      |       |    |      | 42.48 |     |      |       |       |       |       |      |      |      | 100 | 112   |              |
| S26    | 18   | 13       | Mix         | 36.17  | 0.40   | 16.99 | 15.97 |      | 2.43  | 14.04 | 0.61 | 4.33 |       |      | 9.05  |    |      |       |     |      |       |       |       |       |      |      |      | 100 | 107   |              |
| S26    | 18   | 14       | Feohy +     | 6.32   |        | 4.55  | 84.59 |      | 0.95  |       |      |      | 2.61  |      |       |    |      |       |     | 0.98 |       |       |       |       |      |      |      | 100 | 82    |              |
| S26    | 18   | 15       | Ep          | 40.26  |        | 22.74 | 11.47 | 0.32 |       | 22.21 |      |      |       |      |       |    |      |       |     |      |       |       |       |       |      |      |      | 97  | 111   |              |
| S26    | 18   | 16       | "Ilm" +     | 1.18   | 66.12  | 2.28  | 25.15 | 4.04 |       | 0.35  |      |      | 0.89  |      |       |    |      |       |     |      |       |       |       |       |      |      |      | 100 | 98    |              |
| S26    | 18   | 17       | Tur         | 38.33  | 0.83   | 31.12 | 5.11  |      | 8.47  | 0.76  | 2.39 |      |       |      |       |    |      |       |     |      |       |       |       |       |      |      |      | 87  | 97    |              |
| S26    | 18   | 18       | Feohy +     | 4.23   |        | 4.06  | 80.52 |      | 0.96  | 0.46  |      |      | 2.05  |      |       |    |      |       |     |      | 1.63  |       |       |       |      |      | 6.10 | 100 | 74    |              |
| S26    | 18   | 19       | Feohy +     | 1.58   | 1.27   | 2.94  | 61.41 | 1.28 | 1.19  |       | 0.95 |      |       |      |       |    |      | 26.37 |     |      |       |       |       |       |      |      | 3.02 | 100 | 87    |              |
| S26    | 18   | 20       | Ttn +       | 35.46  | 25.72  | 8.84  | 4.99  |      | 3.36  | 19.80 | 0.46 | 1.36 |       |      |       |    |      |       |     |      |       |       |       |       |      |      |      | 100 | 103   |              |
| S26    | 18   | 21       | Feohy +     | 2.56   |        | 3.93  | 86.57 |      |       |       | 1.60 |      | 1.33  |      |       |    |      |       |     |      |       |       |       |       |      |      | 4.01 | 100 | 83    |              |
| S26    | 18   | 22       | Ep          | 40.50  |        | 27.12 | 6.60  |      |       | 22.79 |      |      |       |      |       |    |      |       |     |      |       |       |       |       |      |      |      | 97  | 103   |              |
| S26    | 18   | 23       | Cpx         | 55.03  |        | 0.65  | 7.83  | 0.28 | 15.00 | 21.21 |      |      |       |      |       |    |      |       |     |      |       |       |       |       |      |      |      | 100 | 111   |              |
| S26    | 18   | 24       | Feohy +     | 7.38   |        | 3.51  | 85.93 |      |       | 0.52  |      |      | 1.71  |      |       |    |      |       |     |      | 0.95  |       |       |       |      |      |      | 100 | 79    |              |
| S26    | 18   | 25       | Ttn         | 33.79  | 36.25  | 1.95  | 0.87  |      |       | 27.14 |      |      |       |      |       |    |      |       |     |      |       |       |       |       |      |      |      | 100 | 99    |              |
| S26    | 18   | 26       | Feohy +     | 2.56   |        | 2.66  | 86.42 |      | 1.08  |       | 0.89 |      | 1.22  |      |       |    |      |       |     |      |       |       |       |       |      |      | 5.18 | 100 | 70    |              |
| S26    | 18   | 27       | Zrn         | 30.88  |        |       |       |      |       |       |      |      |       |      |       |    |      |       |     |      |       |       | 67.47 |       |      | 1.65 |      | 100 | 116   |              |
| S26    | 18   | 28       | Ilm +       | 9.93   | 66.25  | 3.96  | 12.32 | 2.54 | 0.62  | 2.22  |      |      |       | 2.15 |       |    |      |       |     |      |       |       |       |       |      |      |      | 100 | 106   |              |
| S26    | 18   | 29       | Feohy +     | 17.53  |        | 3.33  | 72.05 |      | 0.80  |       | 0.77 |      | 1.06  | 0.76 |       |    |      |       |     |      |       |       |       |       |      |      | 3.71 | 100 | 82    |              |
| S26    | 18   | 30       | Qz          | 99.74  |        |       | 0.26  |      |       |       |      |      |       |      |       |    |      |       |     |      |       |       |       |       |      |      |      | 100 | 120   |              |
| S26    | 18   | 31       | Ep          | 39.93  |        | 22.36 | 12.25 |      |       | 22.46 |      |      |       |      |       |    |      |       |     |      |       |       |       |       |      |      |      | 97  | 109   |              |
| S26    | 19   | 1        | Ep          | 40.69  |        | 24.07 | 9.92  |      |       | 22.32 |      |      |       |      |       |    |      |       |     |      |       |       |       |       |      |      |      | 97  | 99    |              |
| S26    | 19   | 2        | Grt         | 39.28  |        | 20.58 | 30.76 | 4.98 | 3.33  | 1.08  |      |      |       |      |       |    |      |       |     |      |       |       |       |       |      |      |      | 100 | 111   |              |
| S26    | 19   | 3        | Feohy +     | 3.32   |        | 2.50  | 89.09 |      |       | 0.43  |      |      | 1.75  |      |       |    | 1.36 |       |     |      | 1.55  |       |       |       |      |      |      | 100 | 75    |              |
| S26    | 19   | 4        | Ilm         | 0.97   | 51.43  | 0.48  | 44.64 | 1.07 | 1.40  |       |      |      |       |      |       |    |      |       |     |      |       |       |       |       |      |      |      | 100 | 106   |              |
| S26    | 19   | 5        | Ep          | 40.22  |        | 25.54 | 8.72  |      |       | 22.52 |      |      |       |      |       |    |      |       |     |      |       |       |       |       |      |      |      | 97  | 108   |              |
| S26    | 19   | 6        | Spl         |        |        | 37.67 | 15.95 |      | 15.99 |       |      |      |       |      |       |    |      | 30.38 |     |      |       |       |       |       |      |      |      | 100 | 111   |              |
| S26    | 19   | 7        | Ap +        | 4.75   |        |       |       |      |       | 44.23 | 1.32 |      | 37.84 | 1.85 | 10.01 |    |      |       |     |      |       |       |       |       |      |      |      | 100 | 117   |              |
| S26    | 19   | 8        | Ep +        | 48.78  |        | 25.10 | 6.13  |      |       | 19.26 | 0.74 |      |       |      |       |    |      |       |     |      |       |       |       |       |      |      |      | 100 | 100   |              |
| S26    | 19   | 9        | Fe-Chr      |        | 1.53   | 16.43 | 38.49 |      | 7.33  |       |      |      |       |      |       |    | 0.72 | 35.50 |     |      |       |       |       |       |      |      |      | 100 | 111   |              |
| S26    | 19   | 10       | Ep          | 37.54  |        | 20.76 | 12.65 | 0.61 |       | 22.78 |      |      | 2.67  |      |       |    |      |       |     |      |       |       |       |       |      |      |      | 97  | 114   |              |
| S26    | 19   | 11       | Feohy + Chl | 18.30  |        | 13.14 | 62.58 |      | 1.49  | 0.36  | 1.55 | 0.81 | 0.87  | 0.89 |       |    |      |       |     |      |       |       |       |       |      |      |      | 100 | 89    |              |
| S26    | 19   | 12       | Qz +        | 95.71  |        | 2.02  | 0.73  |      |       | 1.54  |      |      |       |      |       |    |      |       |     |      |       |       |       |       |      |      |      | 100 | 118   |              |
| S26    | 19   | 13       | Chr         |        |        | 21.96 | 18.88 |      | 12.54 |       |      |      |       |      |       |    | 0.41 | 46.22 |     |      |       |       |       |       |      |      |      | 100 | 112   |              |



Table B14.1: Mineral chemical analyses of sample S26.

| Sample | Site | Position | Mineral    | SiO2   | TiO2  | Al2O3 | FeO   | MnO  | MgO   | CaO   | Na2O  | K2O  | P2O5  | SO3   | F    | Cl | V2O5 | Cr2O3 | NiO | CuO  | ZnO | As2O3 | ZrO2  | Nb2O5 | SnO2 | HfO2 | WO3  | PbO | Total | Actual Total |
|--------|------|----------|------------|--------|-------|-------|-------|------|-------|-------|-------|------|-------|-------|------|----|------|-------|-----|------|-----|-------|-------|-------|------|------|------|-----|-------|--------------|
| S26    | 19   | 14       | Qz         | 99.71  |       |       | 0.29  |      |       |       |       |      |       |       |      |    |      |       |     |      |     |       |       |       |      |      |      | 100 | 124   |              |
| S26    | 19   | 15       | Feohy +    | 4.41   |       | 0.86  | 93.65 |      | 0.65  | 0.43  |       |      |       |       |      |    |      |       |     |      |     |       |       |       |      |      |      | 100 | 81    |              |
| S26    | 19   | 16       | Qz +       | 85.81  |       | 7.78  | 0.58  |      |       | 5.82  |       |      |       |       |      |    |      |       |     |      |     |       |       |       |      |      |      | 100 | 117   |              |
| S26    | 19   | 17       | Ep         | 40.01  |       | 23.89 | 9.93  |      |       | 22.76 |       |      |       |       |      |    | 0.41 |       |     |      |     |       |       |       |      |      |      | 97  | 111   |              |
| S26    | 19   | 18       | Feohy +    | 8.18   |       | 3.54  | 87.27 |      |       | 0.50  |       |      |       |       |      |    |      | 0.50  |     |      |     |       |       |       |      |      |      | 100 | 78    |              |
| S26    | 19   | 19       | Ep         | 40.06  | 0.66  | 24.27 | 9.38  |      |       | 22.63 |       |      |       |       |      |    |      |       |     |      |     |       |       |       |      |      |      | 97  | 108   |              |
| S26    | 19   | 20       | Ep         | 40.29  |       | 22.43 | 12.69 |      |       | 21.59 |       |      |       |       |      |    |      |       |     |      |     |       |       |       |      |      |      | 97  | 104   |              |
| S26    | 19   | 21       | Chl        | 27.93  |       | 17.61 | 23.22 | 0.45 | 15.19 |       |       |      |       | 0.60  |      |    |      |       |     |      |     |       |       |       |      |      |      | 85  | 95    |              |
| S26    | 19   | 22       | Feohy +    | 4.39   |       | 1.96  | 92.15 |      |       | 0.44  |       |      | 1.06  |       |      |    |      |       |     |      |     |       |       |       |      |      |      | 100 | 80    |              |
| S26    | 19   | 23       | Feohy +    | 4.93   |       | 1.68  | 91.98 |      | 0.89  | 0.52  |       |      |       |       |      |    |      |       |     |      |     |       |       |       |      |      |      | 100 | 74    |              |
| S26    | 19   | 24       | Ep         | 40.18  |       | 25.00 | 9.25  |      |       | 22.57 |       |      |       |       |      |    |      |       |     |      |     |       |       |       |      |      |      | 97  | 102   |              |
| S26    | 19   | 25       | Spl        |        |       | 33.40 | 18.06 |      | 14.34 |       |       |      |       |       |      |    |      | 34.20 |     |      |     |       |       |       |      |      |      | 100 | 103   |              |
| S26    | 19   | 26       | Feohy +    | 10.69  |       | 4.05  | 72.50 |      | 1.32  | 0.38  |       | 0.72 | 1.73  | 3.47  |      |    |      |       |     |      |     |       |       |       |      | 5.14 |      | 100 | 74    |              |
| S26    | 19   | 27       | Ep         | 40.75  |       | 26.87 | 6.98  |      |       | 22.39 |       |      |       |       |      |    |      |       |     |      |     |       |       |       |      |      |      | 97  | 104   |              |
| S26    | 19   | 28       | Feohy +    | 6.24   |       |       | 93.76 |      |       |       |       |      |       |       |      |    |      |       |     |      |     |       |       |       |      |      |      | 100 | 71    |              |
| S26    | 19   | 29       | Py +       | 1.67   |       | 0.34  | 43.81 |      |       |       | 0.54  |      | 0.67  | 51.35 |      |    |      |       |     |      |     |       |       |       |      | 1.62 |      | 100 | 144   |              |
| S26    | 19   | 30       | Cpx        | 55.86  |       | 0.64  | 4.61  |      | 16.43 | 22.46 |       |      |       |       |      |    |      |       |     |      |     |       |       |       |      |      |      | 100 | 113   |              |
| S26    | 19   | 31       | Ep         | 39.63  |       | 22.37 | 12.42 | 0.63 |       | 21.95 |       |      |       |       |      |    |      |       |     |      |     |       |       |       |      |      |      | 97  | 108   |              |
| S26    | 19   | 32       | Ep         | 39.88  |       | 23.62 | 11.22 |      |       | 22.28 |       |      |       |       |      |    |      |       |     |      |     |       |       |       |      |      |      | 97  | 106   |              |
| S26    | 19   | 33       | Ilm        |        | 49.29 |       | 49.67 | 1.04 |       |       |       |      |       |       |      |    |      |       |     |      |     |       |       |       |      |      |      | 100 | 102   |              |
| S26    | 19   | 34       | Ilm        |        | 52.11 |       | 46.08 | 1.81 |       |       |       |      |       |       |      |    |      |       |     |      |     |       |       |       |      |      |      | 100 | 104   |              |
| S26    | 19   | 35       | Ap         | 0.95   |       |       |       |      |       | 49.42 |       |      | 42.79 |       | 5.53 |    |      |       |     |      |     |       |       |       |      |      | 1.30 |     | 100   | 119          |
| S26    | 19.1 | 1        | Qz         | 98.88  | 0.48  |       | 0.44  |      |       | 0.20  |       |      |       |       |      |    |      |       |     |      |     |       |       |       |      |      |      | 100 | 120   |              |
| S26    | 19.1 | 2        | Ilm        |        | 58.58 |       | 37.98 | 3.44 |       |       |       |      |       |       |      |    |      |       |     |      |     |       |       |       |      |      |      | 100 | 106   |              |
| S26    | 19.1 | 3        | "Ttn"      | 21.97  | 57.16 | 1.30  | 2.20  |      |       | 17.38 |       |      |       |       |      |    |      |       |     |      |     |       |       |       |      |      |      | 100 | 108   |              |
| S26    | 19.1 | 4        | Qz         | 99.58  |       |       | 0.42  |      |       |       |       |      |       |       |      |    |      |       |     |      |     |       |       |       |      |      |      | 100 | 122   |              |
| S26    | 20   | 1        | Qz         | 100.00 |       |       |       |      |       |       |       |      |       |       |      |    |      |       |     |      |     |       |       |       |      |      |      | 100 | 118   |              |
| S26    | 20   | 2        | Zrn        | 30.92  |       |       |       |      |       |       |       |      |       |       |      |    |      |       |     |      |     |       | 69.08 |       |      |      |      | 100 | 118   |              |
| S26    | 20   | 3        | Feohy +    | 7.16   |       |       | 91.60 |      |       |       |       |      | 1.24  |       |      |    |      |       |     |      |     |       |       |       |      |      |      | 100 | 75    |              |
| S26    | 20   | 4        | "Ttn"      | 20.75  | 61.47 |       | 0.80  |      |       | 16.98 |       |      |       |       |      |    |      |       |     |      |     |       |       |       |      |      |      | 100 | 109   |              |
| S26    | 20   | 5        | Feohy +    | 1.69   |       | 2.78  | 85.33 |      | 1.51  |       |       |      | 1.11  | 2.39  |      |    |      |       |     |      |     |       |       |       |      | 5.18 |      | 100 | 72    |              |
| S26    | 20   | 6        | Ep         | 40.74  |       | 25.78 | 8.03  |      |       | 22.45 |       |      |       |       |      |    |      |       |     |      |     |       |       |       |      |      |      | 97  | 110   |              |
| S26    | 20   | 7        | Ilm        |        | 54.09 |       | 43.99 | 1.92 |       |       |       |      |       |       |      |    |      |       |     |      |     |       |       |       |      |      |      | 100 | 106   |              |
| S26    | 20   | 8        | Chr        |        |       | 12.26 | 21.00 |      | 9.53  |       |       |      |       |       |      |    |      | 57.22 |     |      |     |       |       |       |      |      |      | 100 | 110   |              |
| S26    | 20   | 9        | Grt        | 40.08  |       | 20.55 | 30.14 | 1.28 | 2.31  | 5.64  |       |      |       |       |      |    |      |       |     |      |     |       |       |       |      |      |      | 100 | 116   |              |
| S26    | 20   | 10       | Ep +       | 45.53  |       | 21.47 | 10.46 |      |       | 19.25 | 3.29  |      |       |       |      |    |      |       |     |      |     |       |       |       |      |      |      | 100 | 115   |              |
| S26    | 20   | 11       | Feohy +    | 3.36   |       | 4.10  | 79.61 |      | 0.69  | 0.47  | 0.81  |      | 2.57  |       |      |    |      | 0.49  |     |      |     |       |       |       |      | 7.90 |      | 100 | 80    |              |
| S26    | 20   | 12       | Ap +       |        |       |       | 0.32  |      |       | 47.09 | 1.12  |      | 37.86 | 1.71  | 9.07 |    |      |       |     |      |     |       |       |       |      | 2.84 |      | 100 | 114   |              |
| S26    | 20   | 13       | Chr        |        |       | 20.55 | 17.35 |      | 11.89 |       |       |      |       |       |      |    |      | 50.21 |     |      |     |       |       |       |      |      |      | 100 | 110   |              |
| S26    | 20   | 14       | TiO2 +     | 9.61   | 82.42 | 4.87  | 1.31  |      |       |       |       | 1.79 |       |       |      |    |      |       |     |      |     |       |       |       |      |      |      | 100 | 111   |              |
| S26    | 20   | 15       | Ep         | 43.46  |       | 23.82 | 6.87  |      |       | 22.85 |       |      |       |       |      |    |      |       |     |      |     |       |       |       |      |      |      | 97  | 98    |              |
| S26    | 20   | 16       | Feohy +    | 4.97   |       | 0.85  | 92.79 |      |       | 0.51  |       |      | 0.89  |       |      |    |      |       |     |      |     |       |       |       |      |      |      | 100 | 82    |              |
| S26    | 20   | 17       | Qz +       | 93.58  |       | 2.60  | 1.07  |      |       | 2.74  |       |      |       |       |      |    |      |       |     |      |     |       |       |       |      |      |      | 100 | 106   |              |
| S26    | 20   | 18       | Grt        | 39.57  |       | 20.36 | 30.53 | 2.37 | 1.47  | 5.70  |       |      |       |       |      |    |      |       |     |      |     |       |       |       |      |      |      | 100 | 113   |              |
| S26    | 20   | 19       | Ab         | 66.54  |       | 20.64 | 0.35  |      |       | 1.65  | 10.40 | 0.43 |       |       |      |    |      |       |     |      |     |       |       |       |      |      |      | 100 | 117   |              |
| S26    | 20   | 20       | Feohy +    | 3.96   |       | 0.71  | 95.33 |      |       |       |       |      |       |       |      |    |      |       |     |      |     |       |       |       |      |      |      | 100 | 78    |              |
| S26    | 20   | 21       | Qz +       | 94.26  |       | 2.75  | 1.23  |      | 0.82  |       | 0.29  | 0.66 |       |       |      |    |      |       |     |      |     |       |       |       |      |      |      | 100 | 118   |              |
| S26    | 20   | 22       | Chr +      | 9.29   | 0.39  | 11.26 | 40.43 | 3.18 | 13.27 |       |       |      |       |       |      |    |      | 22.18 |     |      |     |       |       |       |      |      |      | 100 | 103   |              |
| S26    | 20   | 23       | Ttn        | 34.30  | 30.36 | 3.83  | 3.94  |      | 1.68  | 25.11 |       |      |       |       |      |    | 0.79 |       |     |      |     |       |       |       |      |      |      | 100 | 109   |              |
| S26    | 20   | 24       | "Ilm"      |        | 79.95 | 0.86  | 15.11 | 2.37 |       |       |       |      |       |       |      |    | 1.72 |       |     |      |     |       |       |       |      |      |      | 100 | 97    |              |
| S26    | 20   | 25       | Ep         | 42.02  |       | 21.70 | 9.51  |      | 1.70  | 22.07 |       |      |       |       |      |    |      |       |     |      |     |       |       |       |      |      |      | 97  | 104   |              |
| S26    | 20   | 26       | Qz         | 100.00 |       |       |       |      |       |       |       |      |       |       |      |    |      |       |     |      |     |       |       |       |      |      |      | 100 | 114   |              |
| S26    | 20   | 27       | Feohy + Qz | 24.63  | 0.49  | 1.97  | 71.03 |      |       |       |       |      | 0.98  |       |      |    |      | 0.43  |     | 1.45 |     |       |       |       |      |      |      | 100 | 65    |              |
| S26    | 20   | 28       | Feohy +    | 4.12   |       | 1.20  | 93.24 |      |       |       |       |      |       |       |      |    |      | 0.45  |     |      |     |       |       |       |      |      |      | 100 | 82    |              |
| S26    | 20   | 29       | Feohy +    | 19.76  | 1.51  | 4.39  | 70.15 |      | 3.18  |       | 1.01  |      |       |       |      |    |      |       |     |      |     |       |       |       |      |      |      | 100 | 93    |              |

Table B14.1: Mineral chemical analyses of sample S26.

| Sample | Site | Position | Mineral               | SiO2  | TiO2  | Al2O3 | FeO   | MnO  | MgO   | CaO   | Na2O | K2O  | P2O5 | SO3 | F | Cl | V2O5 | Cr2O3 | NiO | CuO | ZnO | As2O3 | ZrO2 | Nb2O5 | SnO2 | HfO2 | WO3  | PbO | Total | Actual Total |     |
|--------|------|----------|-----------------------|-------|-------|-------|-------|------|-------|-------|------|------|------|-----|---|----|------|-------|-----|-----|-----|-------|------|-------|------|------|------|-----|-------|--------------|-----|
| S26    | 20   | 30       | TiO <sub>2</sub> + Qz | 17.67 | 82.33 |       |       |      |       |       |      |      |      |     |   |    |      |       |     |     |     |       |      |       |      |      |      |     | 100   | 106          |     |
| S26    | 20   | 31       | Mix                   | 66.46 |       | 12.00 | 0.46  |      |       | 21.09 |      |      |      |     |   |    |      |       |     |     |     |       |      |       |      |      |      |     |       | 100          | 105 |
| S26    | 20   | 32       | Cpx                   | 53.20 | 0.46  | 2.88  | 7.73  |      | 13.43 | 22.30 |      |      |      |     |   |    |      |       |     |     |     |       |      |       |      |      |      |     |       | 100          | 108 |
| S26    | 20   | 33       | Feohy + Qz +          | 10.31 |       | 2.51  | 87.17 |      |       |       |      |      |      |     |   |    |      |       |     |     |     |       |      |       |      |      |      |     |       | 100          | 73  |
| S26    | 20   | 34       | Mix                   | 31.21 | 0.48  | 13.57 | 43.45 |      | 2.25  |       | 0.99 | 3.60 | 0.85 |     |   |    |      |       |     |     |     |       |      |       |      |      | 3.61 |     |       | 100          | 90  |
| S26    | 20   | 35       | Ep +                  | 43.52 |       | 24.15 | 10.31 |      | 0.99  | 20.24 | 0.39 | 0.40 |      |     |   |    |      |       |     |     |     |       |      |       |      |      |      |     |       | 100          | 92  |
| S26    | 20.1 | 1        | Mag                   |       |       |       | 98.78 | 1.22 |       |       |      |      |      |     |   |    |      |       |     |     |     |       |      |       |      |      |      |     |       | 100          | 101 |
| S26    | 20.1 | 2        | Mag                   |       |       |       | 99.22 | 0.78 |       |       |      |      |      |     |   |    |      |       |     |     |     |       |      |       |      |      |      |     |       | 100          | 102 |
| S26    | 20.1 | 3        | Feohy                 |       |       |       | 93.21 |      |       | 0.51  | 0.84 |      | 1.23 |     |   |    |      |       |     |     |     |       |      |       |      |      | 4.21 |     |       | 100          | 82  |
| S26    | 20.1 | 4        | Mag                   |       |       | 0.75  | 99.25 |      |       |       |      |      |      |     |   |    |      |       |     |     |     |       |      |       |      |      |      |     |       | 100          | 93  |
|        |      |          |                       |       |       |       |       |      |       |       |      |      |      |     |   |    |      |       |     |     |     |       |      |       |      |      |      |     |       |              |     |
|        |      |          |                       |       |       |       |       |      |       |       |      |      |      |     |   |    |      |       |     |     |     |       |      |       |      |      |      |     |       |              |     |
|        |      |          |                       |       |       |       |       |      |       |       |      |      |      |     |   |    |      |       |     |     |     |       |      |       |      |      |      |     |       |              |     |
|        |      |          |                       |       |       |       |       |      |       |       |      |      |      |     |   |    |      |       |     |     |     |       |      |       |      |      |      |     |       |              |     |
|        |      |          |                       |       |       |       |       |      |       |       |      |      |      |     |   |    |      |       |     |     |     |       |      |       |      |      |      |     |       |              |     |
|        |      |          |                       |       |       |       |       |      |       |       |      |      |      |     |   |    |      |       |     |     |     |       |      |       |      |      |      |     |       |              |     |
|        |      |          |                       |       |       |       |       |      |       |       |      |      |      |     |   |    |      |       |     |     |     |       |      |       |      |      |      |     |       |              |     |
|        |      |          |                       |       |       |       |       |      |       |       |      |      |      |     |   |    |      |       |     |     |     |       |      |       |      |      |      |     |       |              |     |
|        |      |          |                       |       |       |       |       |      |       |       |      |      |      |     |   |    |      |       |     |     |     |       |      |       |      |      |      |     |       |              |     |
|        |      |          |                       |       |       |       |       |      |       |       |      |      |      |     |   |    |      |       |     |     |     |       |      |       |      |      |      |     |       |              |     |
|        |      |          |                       |       |       |       |       |      |       |       |      |      |      |     |   |    |      |       |     |     |     |       |      |       |      |      |      |     |       |              |     |
|        |      |          |                       |       |       |       |       |      |       |       |      |      |      |     |   |    |      |       |     |     |     |       |      |       |      |      |      |     |       |              |     |
|        |      |          |                       |       |       |       |       |      |       |       |      |      |      |     |   |    |      |       |     |     |     |       |      |       |      |      |      |     |       |              |     |
|        |      |          |                       |       |       |       |       |      |       |       |      |      |      |     |   |    |      |       |     |     |     |       |      |       |      |      |      |     |       |              |     |
|        |      |          |                       |       |       |       |       |      |       |       |      |      |      |     |   |    |      |       |     |     |     |       |      |       |      |      |      |     |       |              |     |
|        |      |          |                       |       |       |       |       |      |       |       |      |      |      |     |   |    |      |       |     |     |     |       |      |       |      |      |      |     |       |              |     |
|        |      |          |                       |       |       |       |       |      |       |       |      |      |      |     |   |    |      |       |     |     |     |       |      |       |      |      |      |     |       |              |     |
|        |      |          |                       |       |       |       |       |      |       |       |      |      |      |     |   |    |      |       |     |     |     |       |      |       |      |      |      |     |       |              |     |
|        |      |          |                       |       |       |       |       |      |       |       |      |      |      |     |   |    |      |       |     |     |     |       |      |       |      |      |      |     |       |              |     |
|        |      |          |                       |       |       |       |       |      |       |       |      |      |      |     |   |    |      |       |     |     |     |       |      |       |      |      |      |     |       |              |     |
|        |      |          |                       |       |       |       |       |      |       |       |      |      |      |     |   |    |      |       |     |     |     |       |      |       |      |      |      |     |       |              |     |
|        |      |          |                       |       |       |       |       |      |       |       |      |      |      |     |   |    |      |       |     |     |     |       |      |       |      |      |      |     |       |              |     |
|        |      |          |                       |       |       |       |       |      |       |       |      |      |      |     |   |    |      |       |     |     |     |       |      |       |      |      |      |     |       |              |     |
|        |      |          |                       |       |       |       |       |      |       |       |      |      |      |     |   |    |      |       |     |     |     |       |      |       |      |      |      |     |       |              |     |
|        |      |          |                       |       |       |       |       |      |       |       |      |      |      |     |   |    |      |       |     |     |     |       |      |       |      |      |      |     |       |              |     |
|        |      |          |                       |       |       |       |       |      |       |       |      |      |      |     |   |    |      |       |     |     |     |       |      |       |      |      |      |     |       |              |     |
|        |      |          |                       |       |       |       |       |      |       |       |      |      |      |     |   |    |      |       |     |     |     |       |      |       |      |      |      |     |       |              |     |
|        |      |          |                       |       |       |       |       |      |       |       |      |      |      |     |   |    |      |       |     |     |     |       |      |       |      |      |      |     |       |              |     |
|        |      |          |                       |       |       |       |       |      |       |       |      |      |      |     |   |    |      |       |     |     |     |       |      |       | </   |      |      |     |       |              |     |
