# Supplementary material
Source: MDPI journal article supplement (https://www.mdpi.com/2076-3263/12/11/392)
Supplement: s1 [file s1]

Table S1. Location of samples

| sample |                      | Lat °N   | Long °E  |                       |
|--------|----------------------|----------|----------|-----------------------|
| 1/2    | Ag. Triada terrace   | 37.84805 | 21.64549 | coarse sand           |
| 5      | lower Evinos         | 38.38493 | 21.55382 | medium sand           |
| 8      | upper Louros         | 39.3833  | 20.86977 | medium sand           |
| 9      | upper Arachthos      | 39.5762  | 20.97607 | coarse sand           |
| 10     | upper Arachthos      | 39.5762  | 20.97607 | muddy fine sand       |
| 11     | lower Louros         | 39.18115 | 20.88918 | muddy fine sand       |
| 12     | Monolithos beach     | 39.02675 | 20.71463 | fine sand             |
| 15     | Aktion beach         | 38.9445  | 20.76085 | fine sand             |
| 17     | Ag. Nikolaos terrace | 38.8977  | 20.79822 | fresh coarse sand     |
| 18     | lower Acheloos       | 38.40952 | 21.25332 | muddy fine sand       |
| 22     | middle Acheloos      | 38.57143 | 21.2509  | medium sand           |
| 23     | Stanos terrace       | 38.79147 | 21.18473 | coarse sand (altered) |
| 24     | Loutraki terrace     | 38.85678 | 21.08662 | coarse sand (altered) |
| 25     | Pogonia beach        | 38.79665 | 20.86503 | medium sand           |
| 26     | Mytikas beach        | 38.67755 | 20.93325 | medium-coarse sand    |
