# Supplementary material
Source: MDPI journal article supplement (https://www.mdpi.com/2076-3263/12/11/392)
Supplement: s1 [file s1]

Supplementary File S1: SEM-BSE  
images and Electron Dispersive  
Spectroscopy (EDS) mineral analyses  
for sand samples.

A1: SEM-BSE images and EDS  
mineral analyses for sample S1

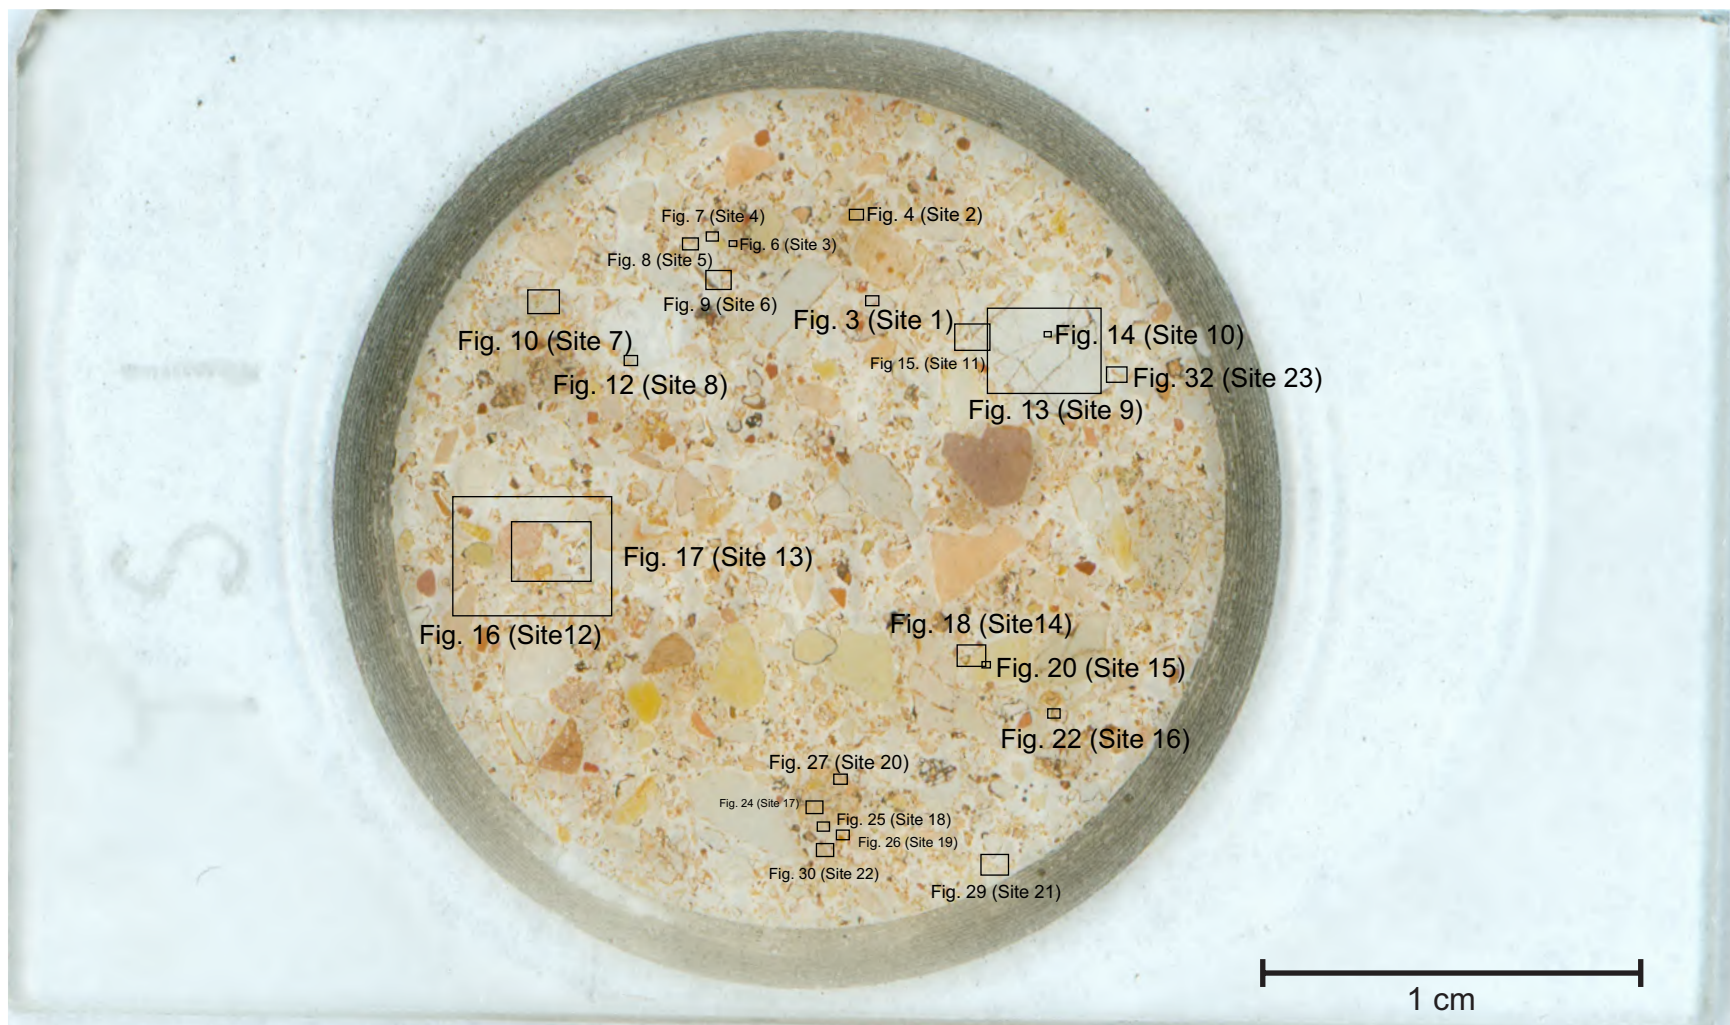

Figure A1:1: Slide S1: Sample taken from a fine sand bed ~ 1m below present surface.

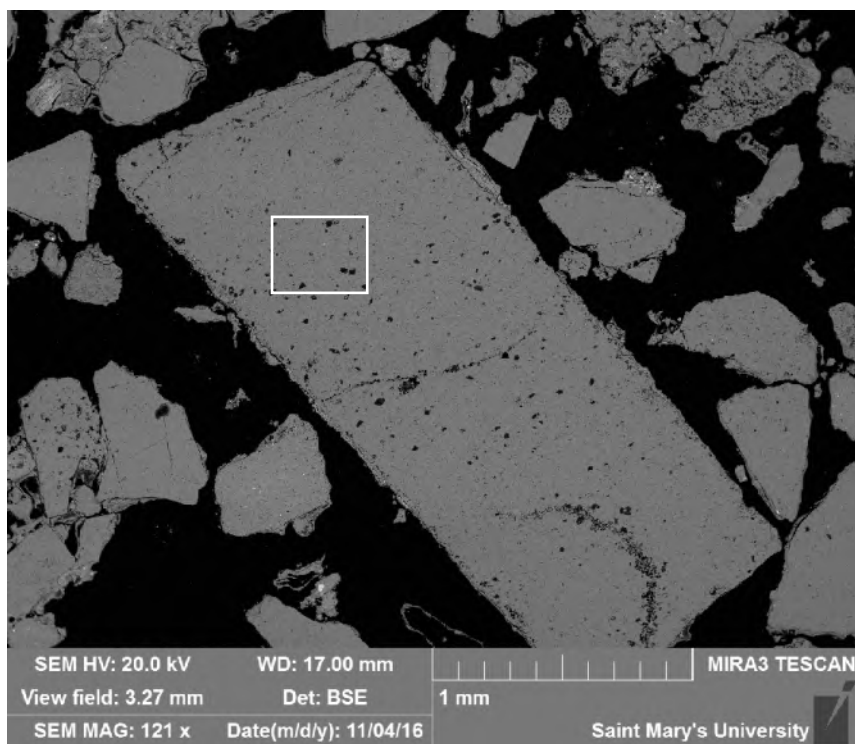

Figure A1.2: Sample S1 (SEM).

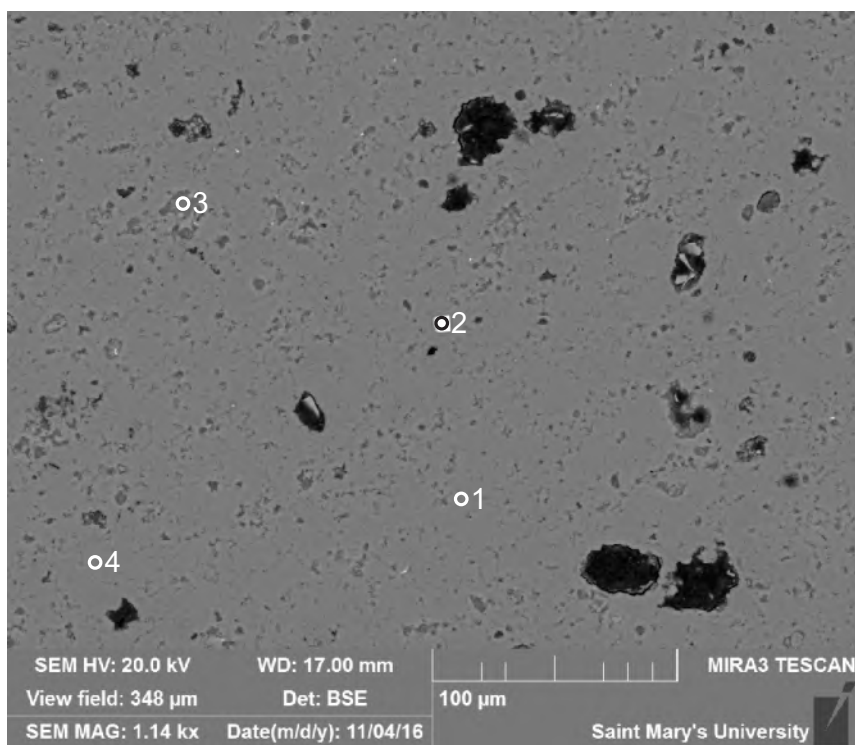

- 1: Quartz
- 2: Fe-oxide/hydroxide+
- 3: Quartz +
- 4: Quartz

Figure A1.3: Sample S1 Site 1 (SEM). This site contains: Detrital quartz (1, 3, 4) with voids filled with Fe-oxide/hydroxide (2) (pedogenetically).



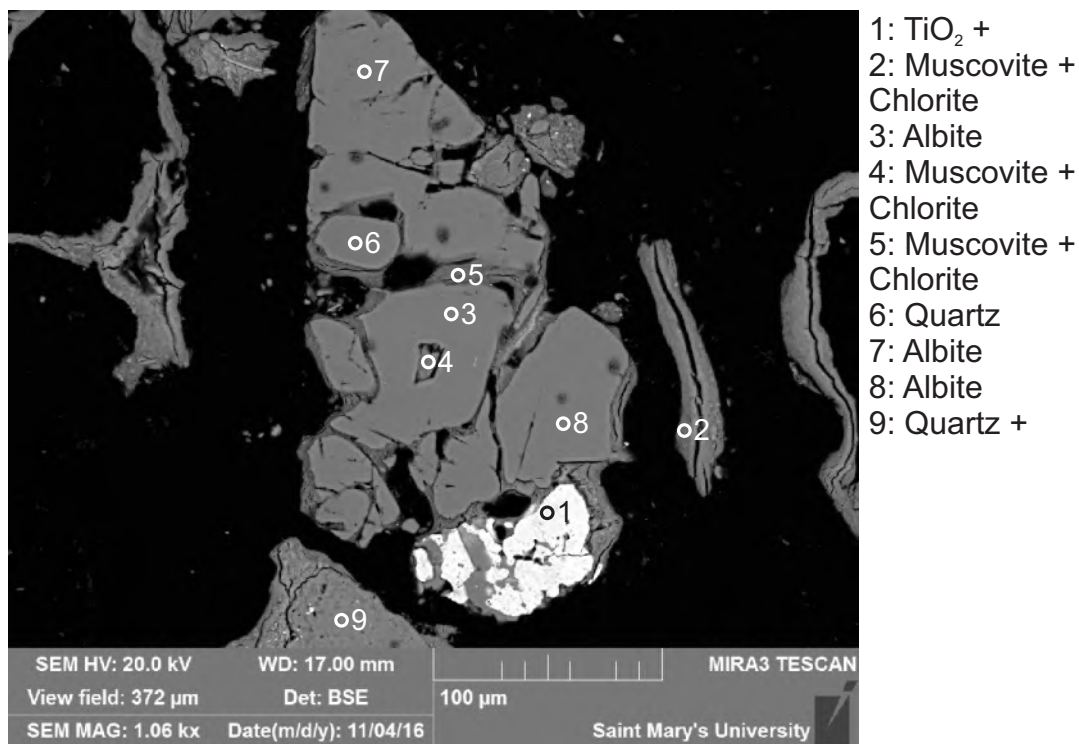

Figure A1.4: Sample S1 Site 2 (SEM). This site contains: Detrital albite (3, 7, 8), quartz (6, 8) chlorite (2,4-5) and  $\text{TiO}_2$  (1). Lithic clast (albite + muscovite +  $\text{TiO}_2$  (1,3-8, granite).

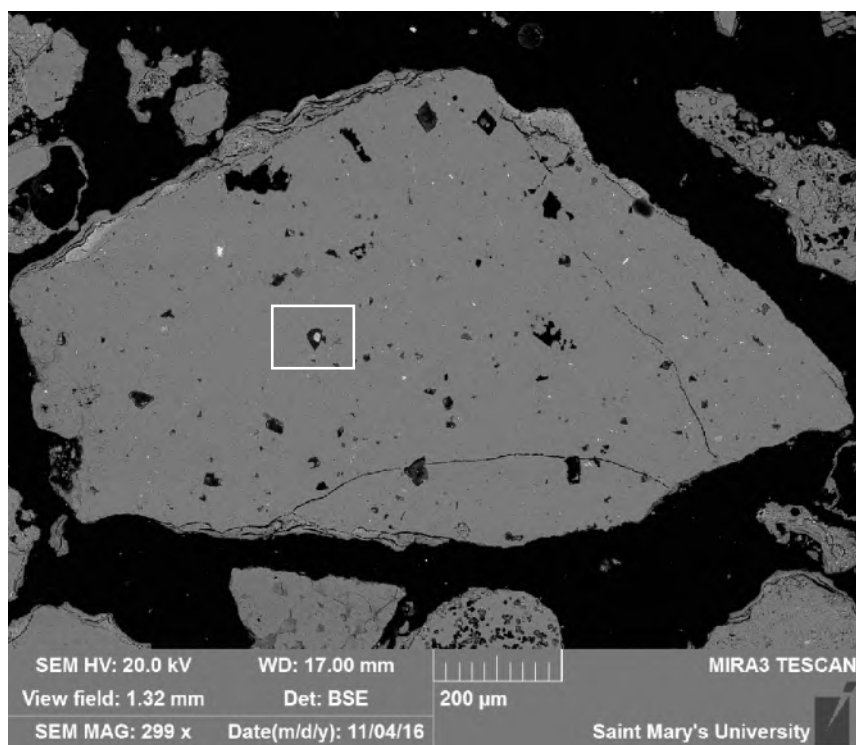

Figure A1.5: Sample S1 (SEM).

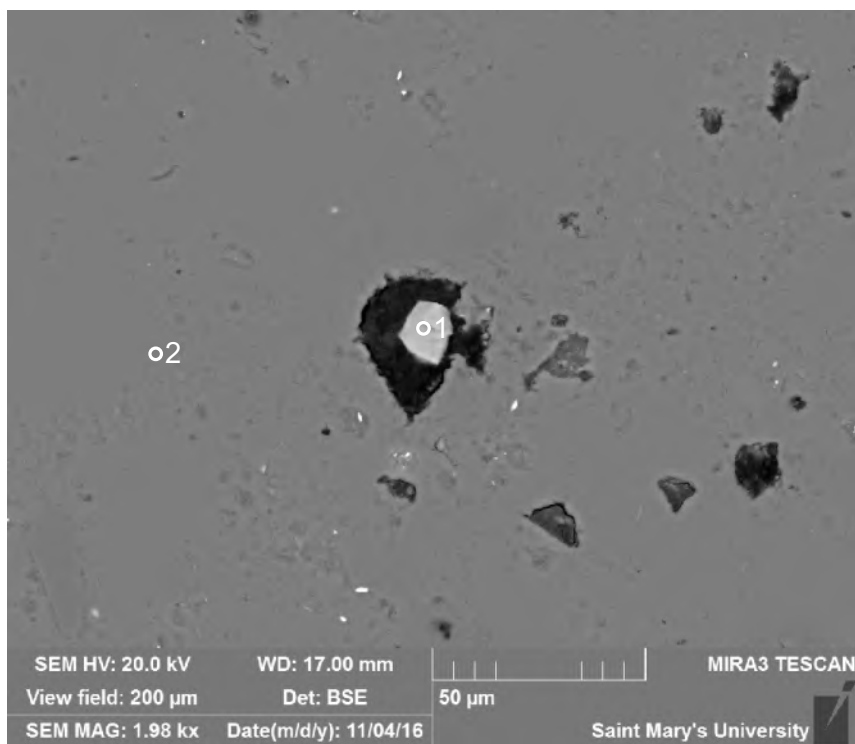

- 1: Epidote
- 2: Quartz

Figure A1.6: Sample S1 Site 3 (SEM). This site contains: Detrital quartz (2), and epidote (1). Lithic clast: Quartz + Epidote (1-2), crystal of quartz with epidote in a void.

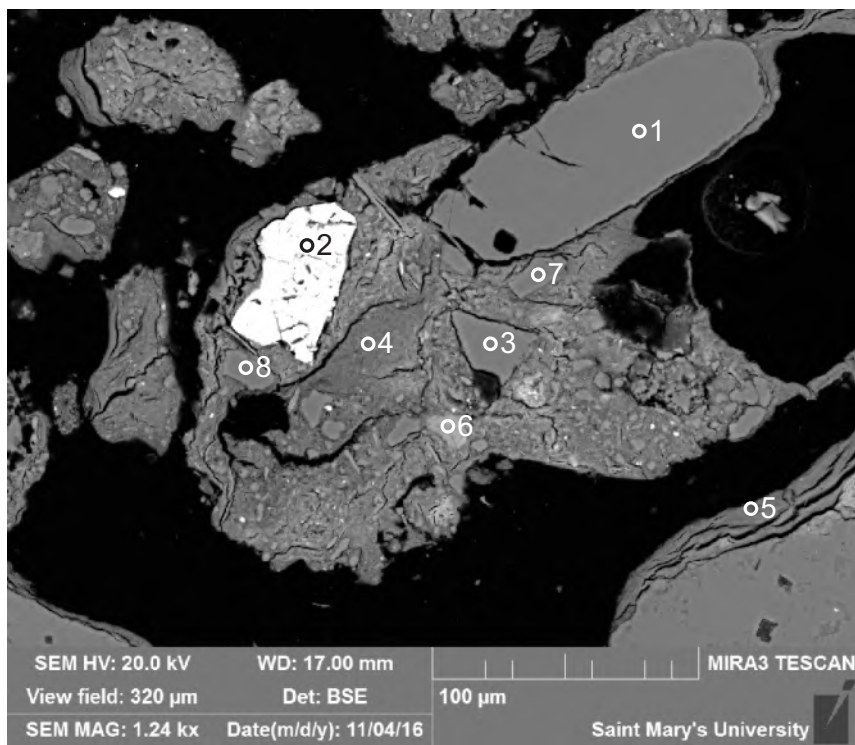

- 1: Albite
- 2: Ti- Magnetite
- 3: Quartz
- 4: Muscovite + Chlorite
- 5: Muscovite + Chlorite
- 6: Chlorite
- 7: Quartz
- 8: Quartz

Figure A1.7: Sample S1 Site 4 (SEM). This site contains: Detrital albite (1), quartz (3,7,8), Ti-Magnetite (2), muscovite (4,5), and chlorite (4-6). Lithic clast: Quartz + Albite + Muscovite + Magnetite (1-4,6-7, granite-chloritized muscovite).

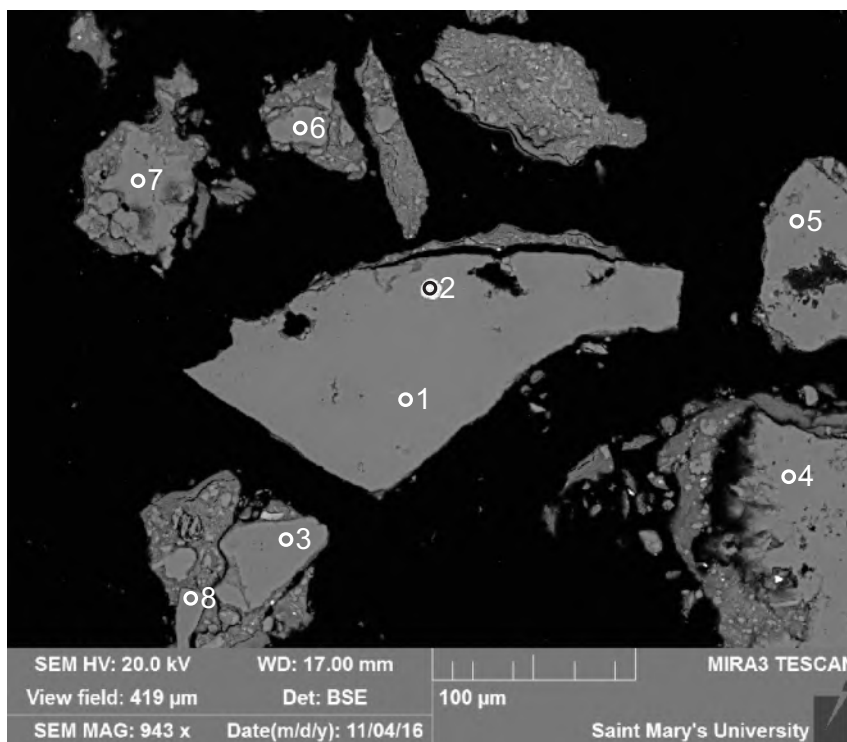

- 1: Quartz
- 2: Fe-oxide/hydroxide+
- 3: Quartz
- 4: Quartz
- 5: Quartz
- 6: Quartz
- 7: Quartz
- 8: Quartz

Figure A1.8: Sample S1 Site 5 (SEM). This site contains: Detrital quartz (1, 3, 4, 5, 6, 7, 8) with grains of quartz containing inclusions of Fe- oxide/hydroxide (2).

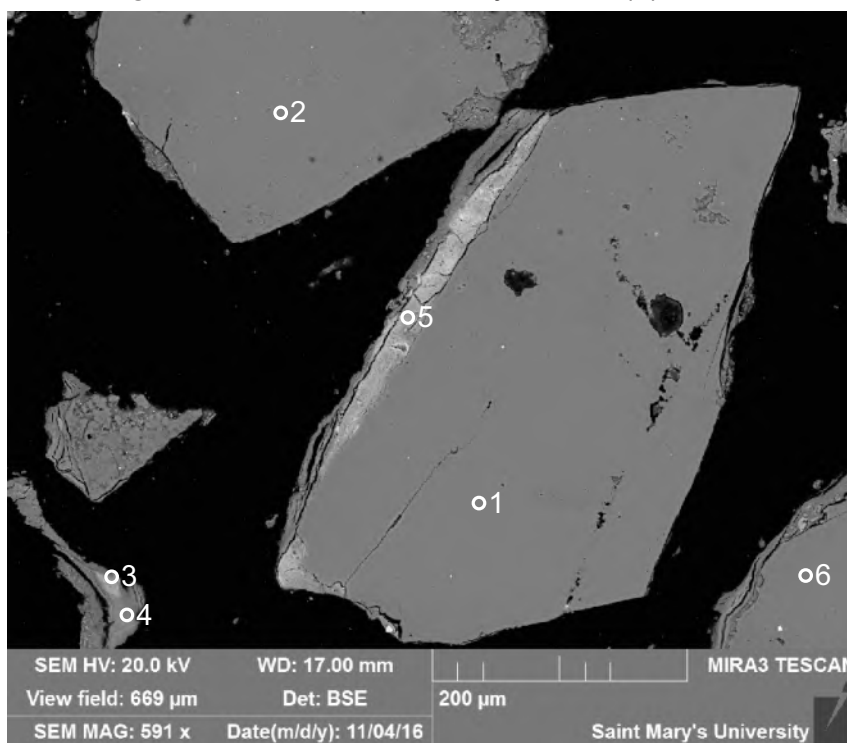

- 1: Quartz
- 2: Quartz
- 3: Chlorite + Muscovite
- 4: Muscovite + Chlorite
- 5: Chlorite + Muscovite
- 6: Quartz

Figure A1.9: Sample S1 Site 6 (SEM). This site contains: Detrital quartz (1, 2, 6) and chloritized muscovite (3-5). Lithic clast: Quartz + Muscovite (1-5, granite).

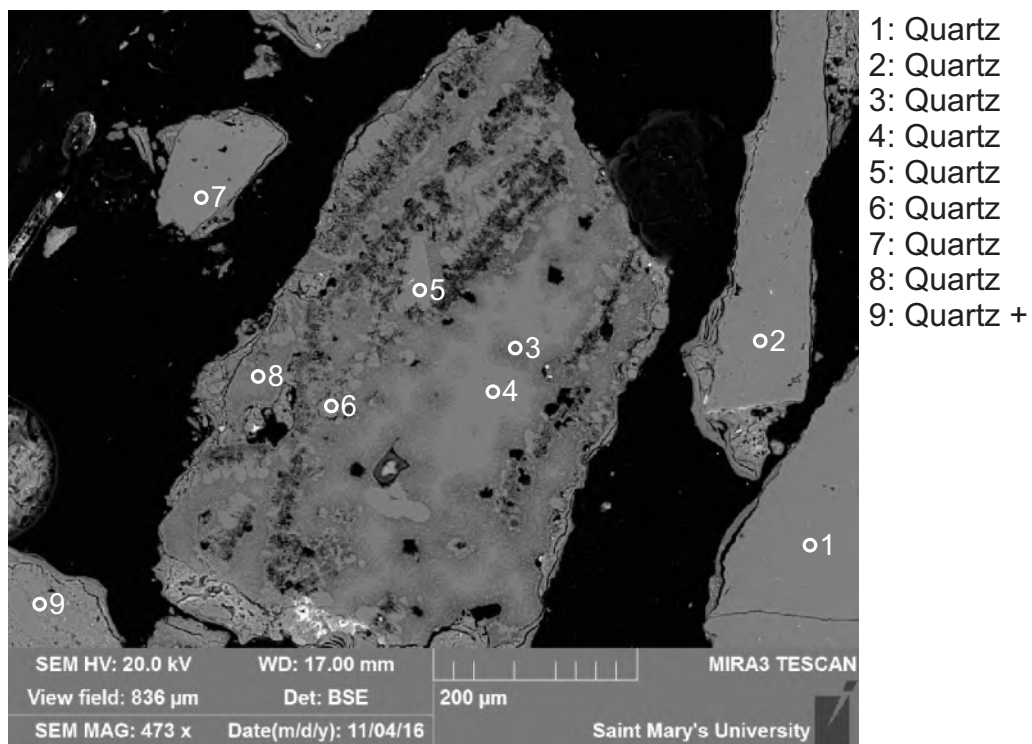

Figure A1.10: Sample S1 Site 7 (SEM). This site contains: Detrital partially dissolved quartz.

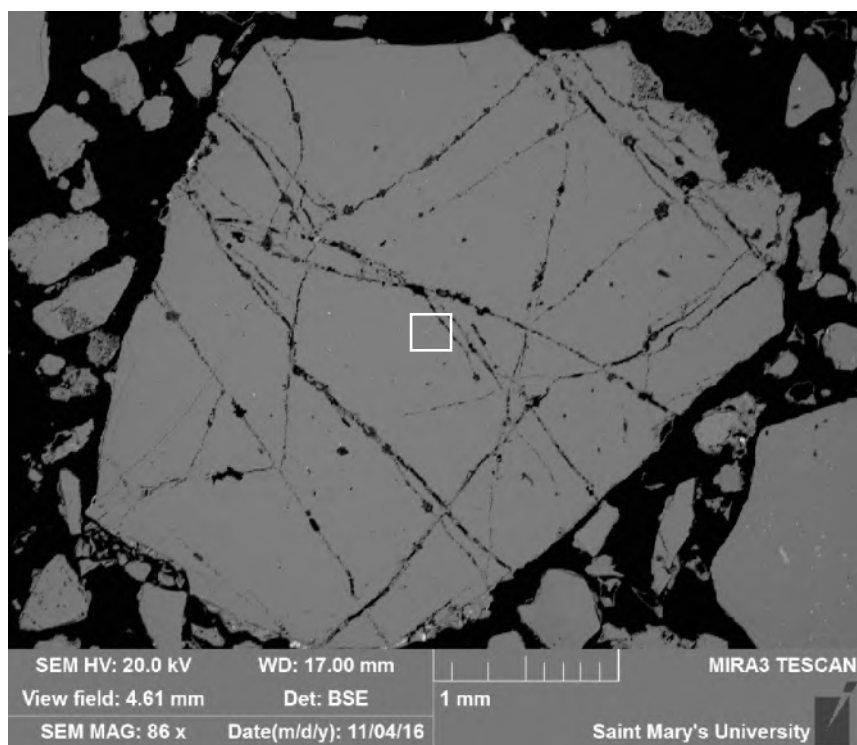

Figure A1.11: Sample S1 (SEM). Fractured detrital quartz.



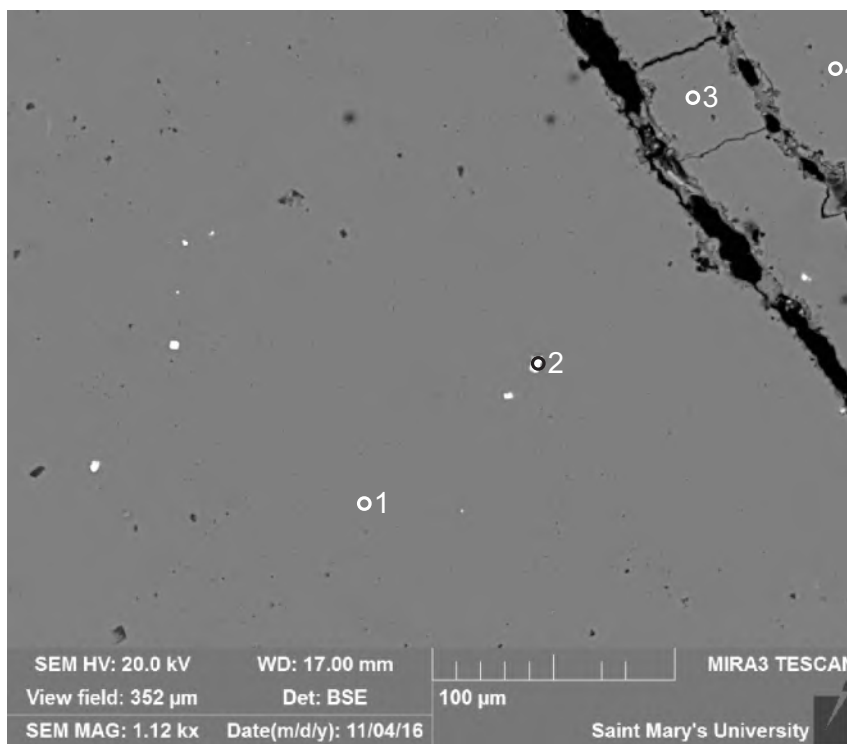

- 1: Quartz
- 2: Pyrite
- 3: Quartz
- 4: Quartz

Figure A1.12: Sample S1 Site 8 (SEM). This site contains: Detrital fractured quartz (1, 3, 4) with inclusions of pyrite (2).

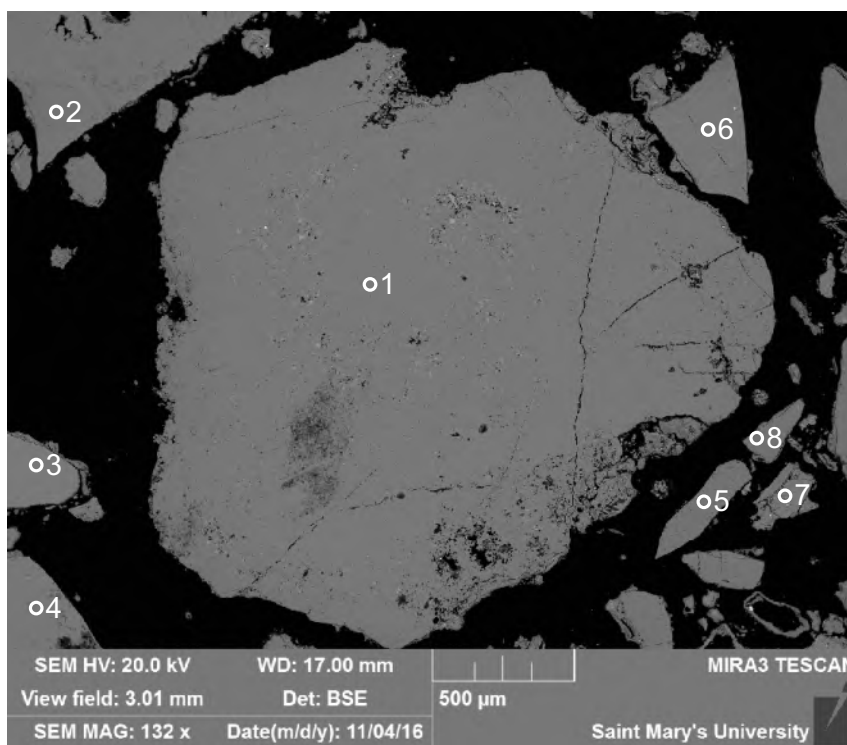

- 1: Quartz
- 2: Quartz
- 3: Quartz + Albite
- 4: Quartz
- 5: Quartz
- 6: Quartz
- 7: Quartz + K-feldspar
- 8: Quartz

Figure A1.13: Sample S1 Site 9 (SEM). This site contains: Detrital fractured quartz.



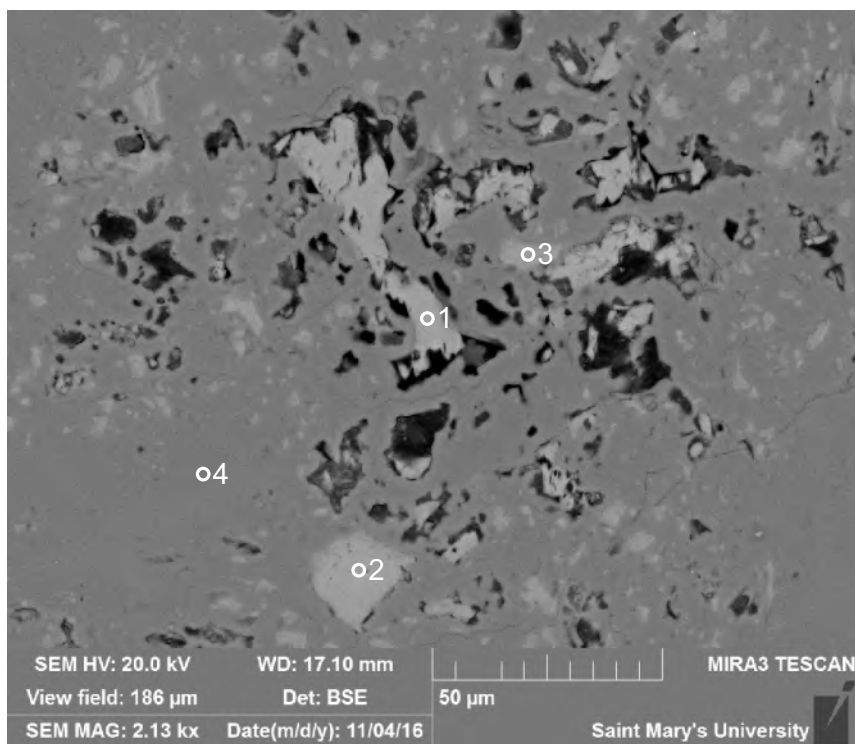

- 1: Calcite+
- 2: Calcite
- 3: Calcite+
- 4: Quartz

Figure A1.14: Sample S1 Site 10 (SEM). This site contains: Detrital partially dissolved quartz (4) with calcite (1,2,3) filling (?pedogenetically) voids.

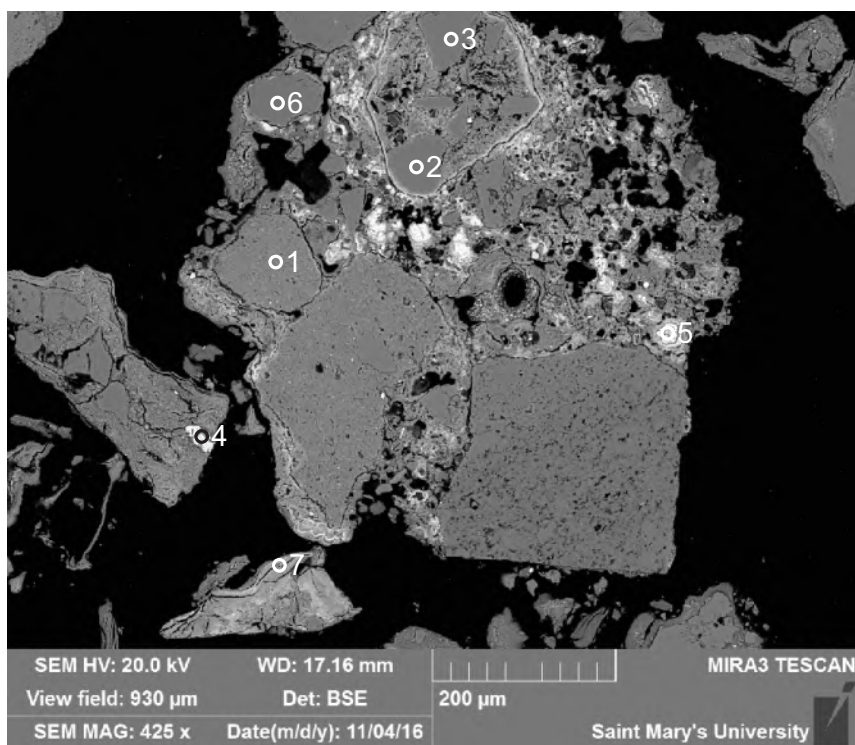

- 1: Quartz+
- 2: Quartz
- 3: Quartz
- 4:  $\text{TiO}_2$  +
- 5: Mn- hydroxide +
- 6: Quartz
- 7: Chlorite +  
Muscovite

Figure A1.15: Sample S1 Site 11 (SEM). This site contains: Detrital quartz (1, 2, 3, 6) and muscovite (7) pedogenically cemented with Mn-hydroxide mineral mixtures.

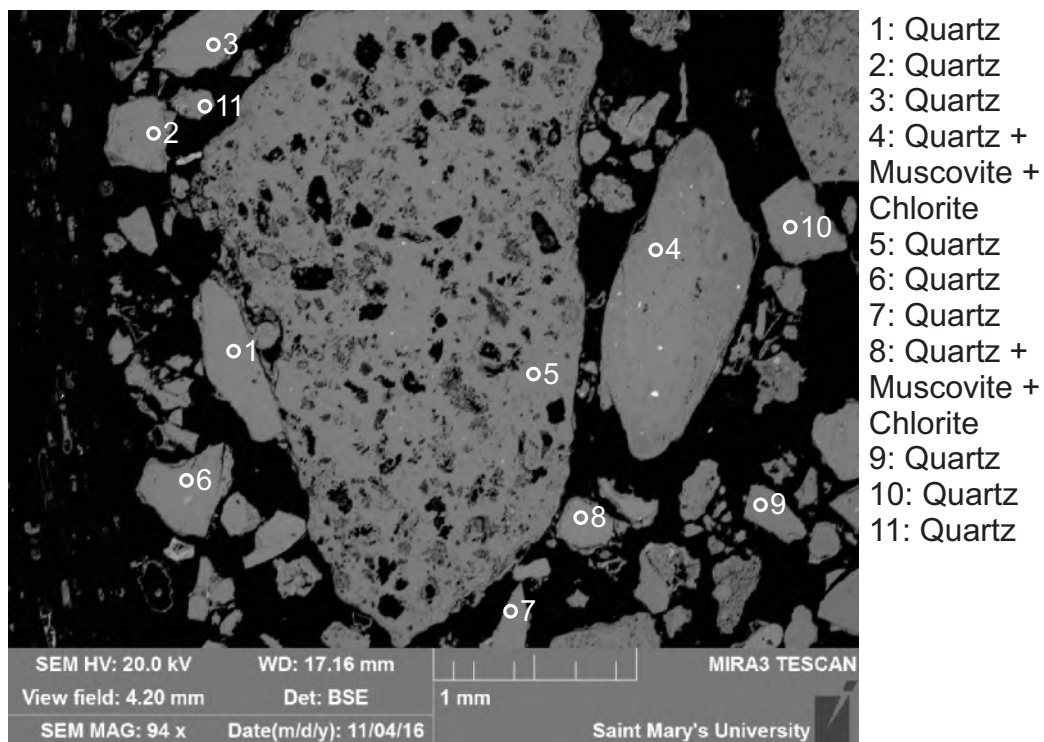

Figure A1.16: Sample S1 Site 12 (SEM). This site contains: Detrital partially dissolved quartz (5) and other quartz grains in contact with chloritized muscovite (4,8) - too low magnification to be seen.

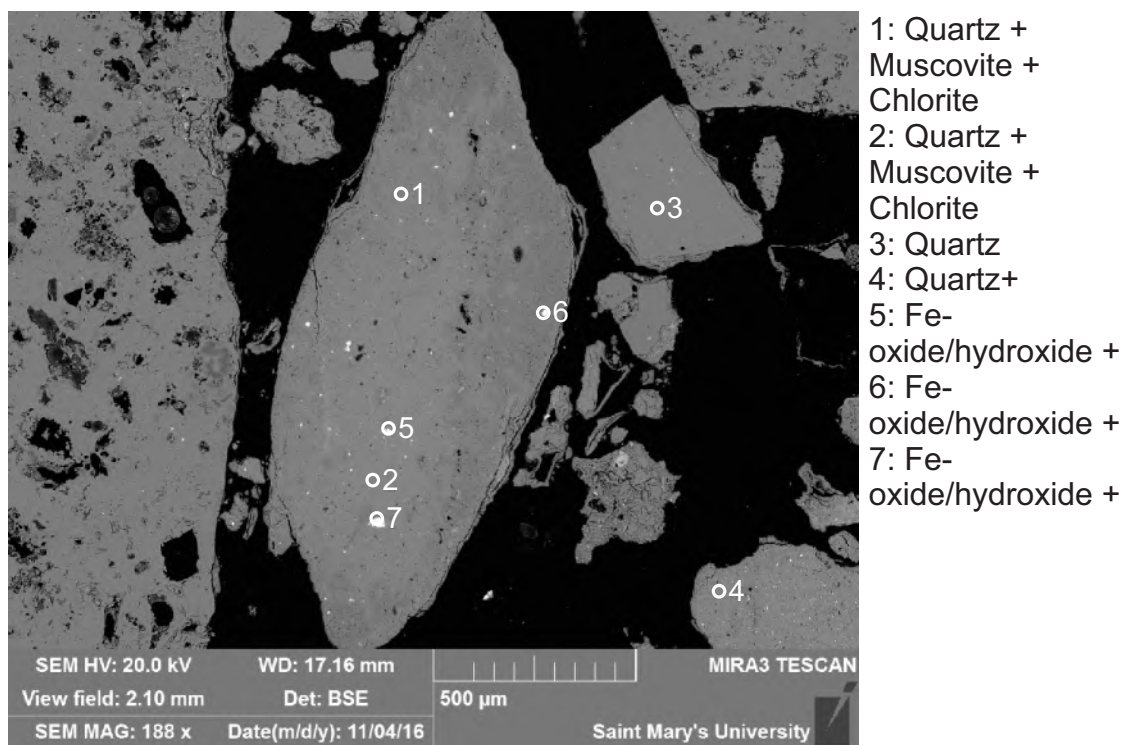

Figure A1.17: Sample S1 Site 13 (SEM). This site contains: Detrital quartz (1-4) with inclusions of Fe-oxide/hydroxide (5-7), and probably in contact with chloritized muscovite (1-2).

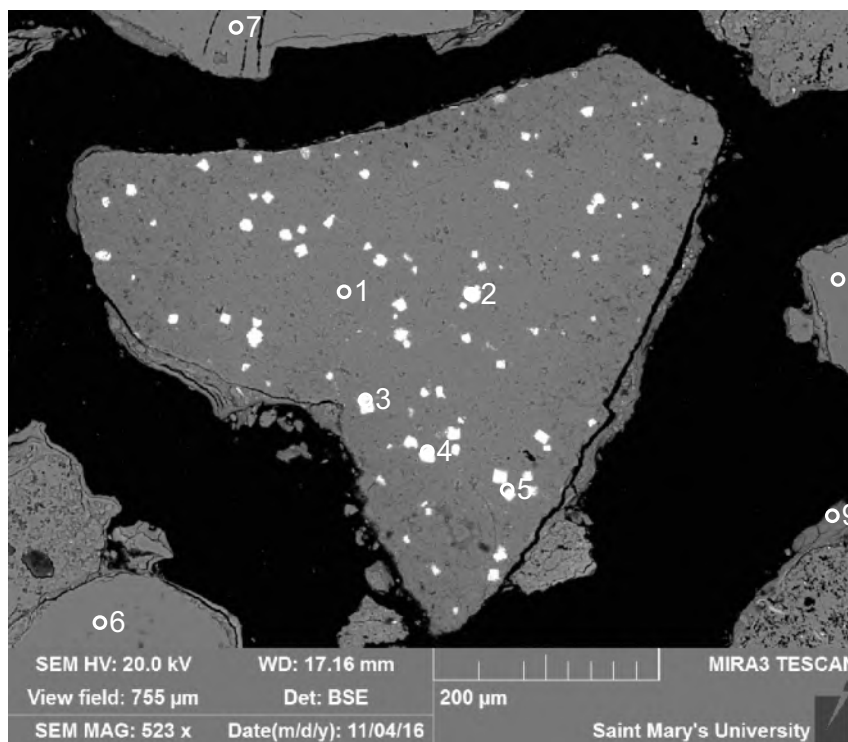

- 1: Quartz
- 2: Fe-oxide/hydroxide +
- 3: Fe-oxide/hydroxide +
- 4: Fe-oxide/hydroxide +
- 5: Fe-oxide/hydroxide +
- 6: Quartz
- 7: Quartz
- 8: Quartz
- 9: Muscovite + Chlorite

Figure A1.18: Sample S1 Site 14 (SEM). This site contains: Detrital quartz (1, 6, 7, 8) with grains of Fe-oxide/hydroxide (2, 3, 4, 5) and detrital chloritized muscovite (9). Lithic clast: Quartz + Muscovite (9, granite)

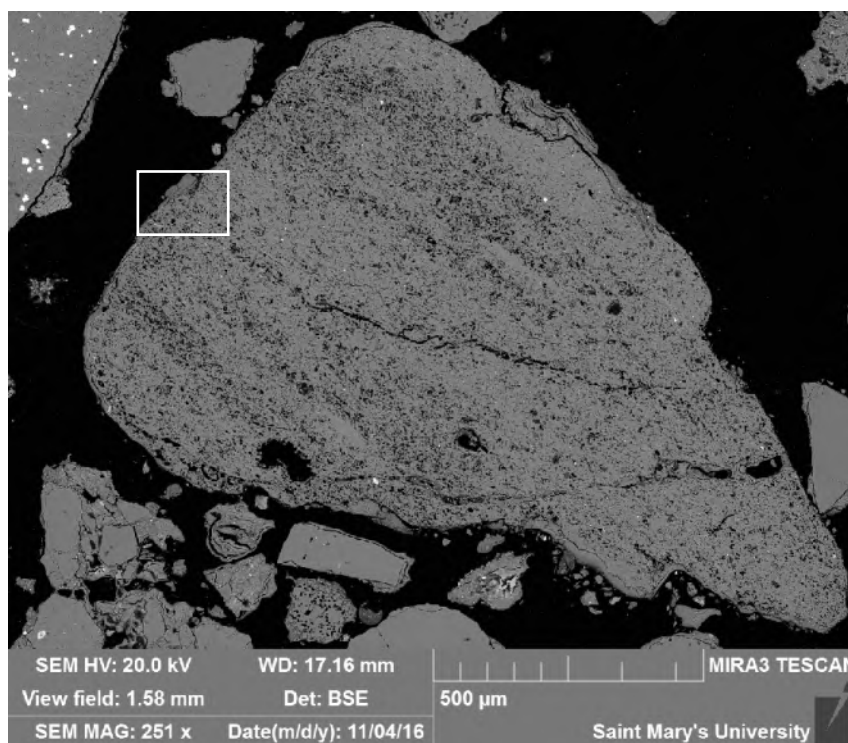

Figure A1.19: Sample S1 (SEM).



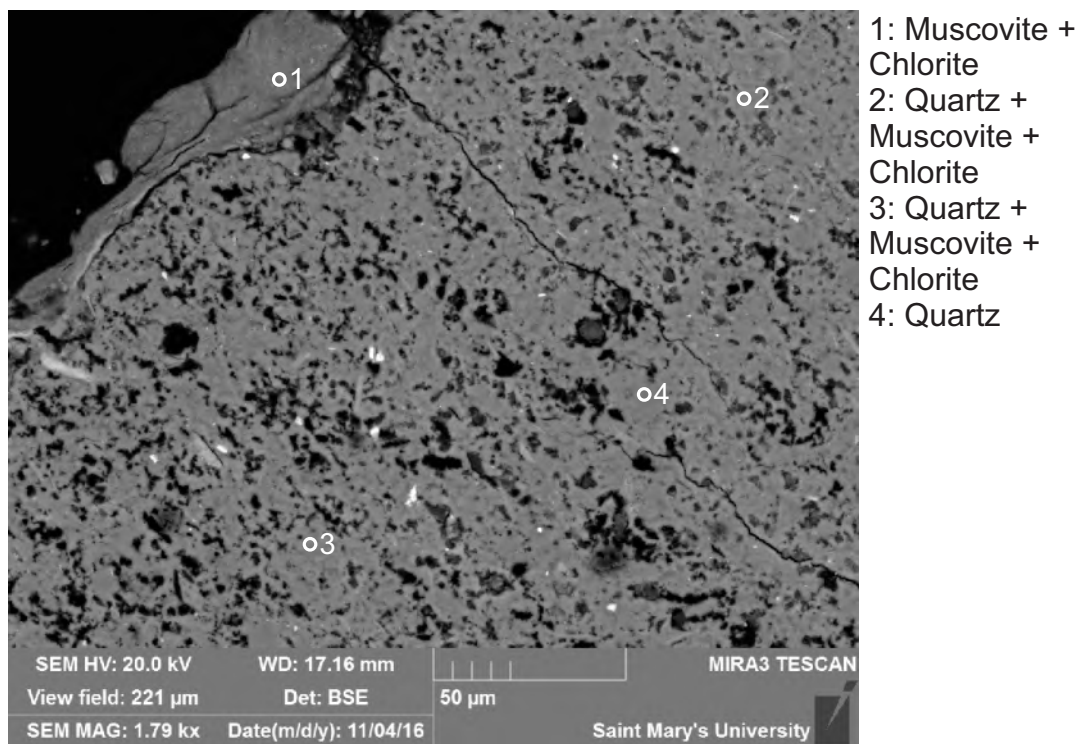

Figure A1.20: Sample S1 Site 15 (SEM). This site consists of detrital quartz (2, 3, 4). with abundant voids, some fractures, and chloritized muscovite (1). Lithic clast: Quartz + Muscovite (1-4, granite).

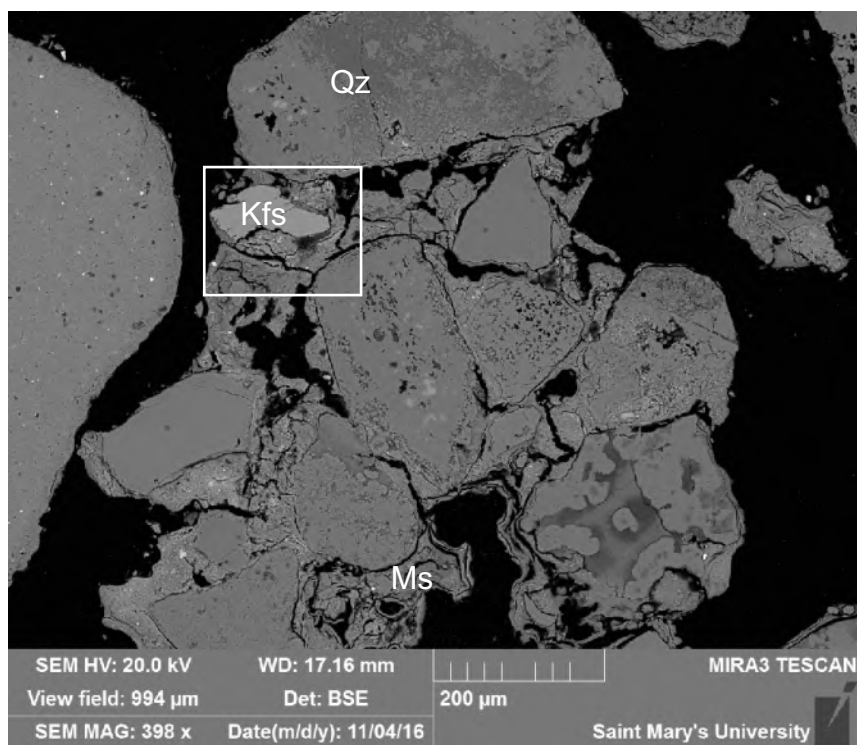

Figure A1.21: Sample S1 (SEM).

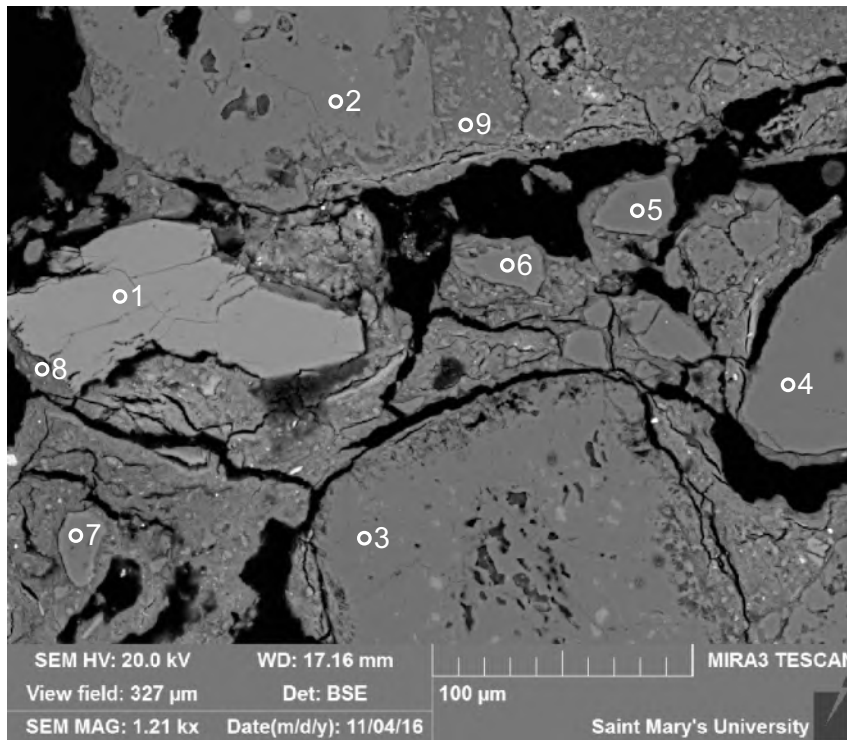

- 1: K-Feldspar
- 2: Quartz
- 3: Quartz
- 4: Quartz
- 5: Quartz
- 6: Quartz
- 7: Quartz
- 8: K-feldspar + Chlorite
- 9: Quartz

Figure A1.22: Sample S1 Site 16 (SEM). This site contains: Detrital K-feldspar (1) and quartz (2-7,9). Lithic clast: Quartz + K-feldspar (1-9, deformed and partially dissolved granite).

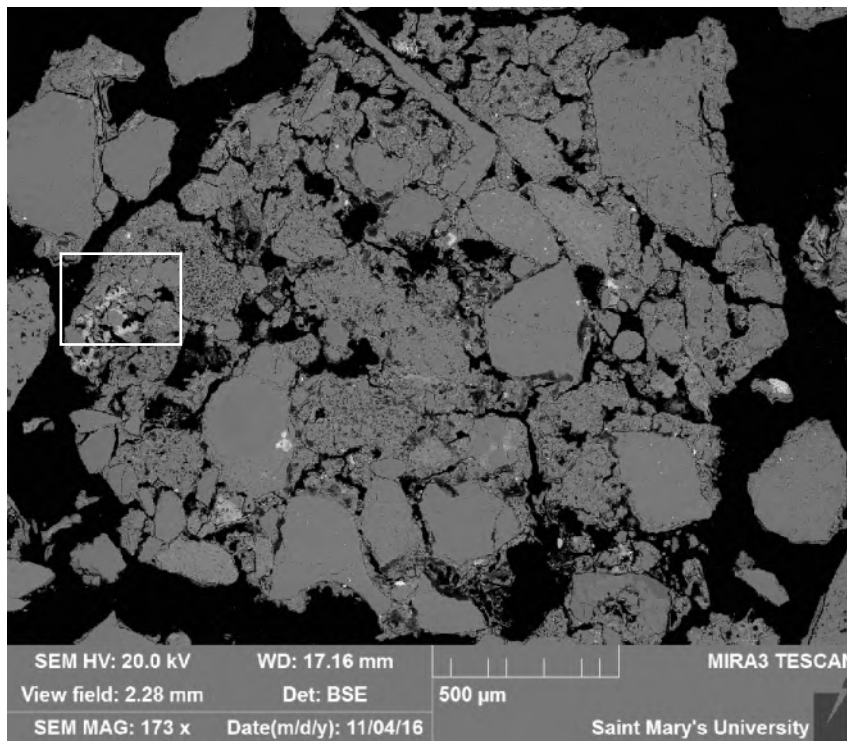

Figure A1.23: Sample S1 (SEM).



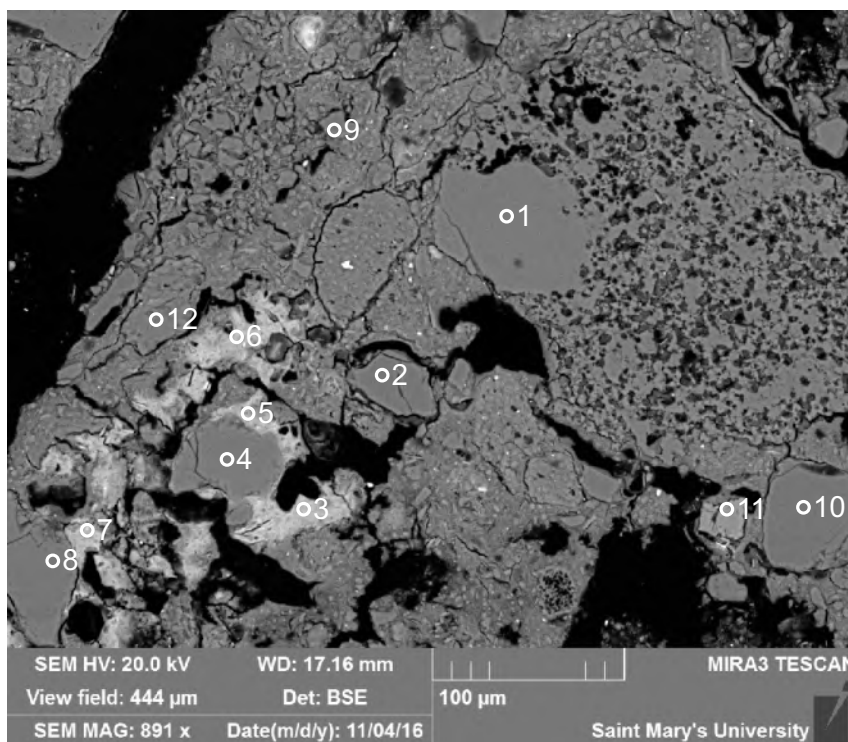

- 1: Quartz
- 2: Quartz
- 3: Chlorite + Mn-hydroxide
- 4: Quartz
- 5: Chlorite + Mn-hydroxide
- 6: Chlorite + Mn-hydroxide
- 7: Chlorite + Mn-hydroxide
- 8: Quartz
- 9: Quartz
- 10: Quartz
- 11: K-feldspar
- 12: Quartz +

Figure A1.24: Sample S1 Site 17 (SEM). This site contains: Detrital quartz (1-2,4,8-10,12) and K-feldspar (11) and chlorite + Mn-hydroxide throughout (3, 5-7). Lithic clast: Quartz + K-feldspar (1,2,4,8-10,11, granite pedogenetically altered - Mn-hydroxide + Chlorite).

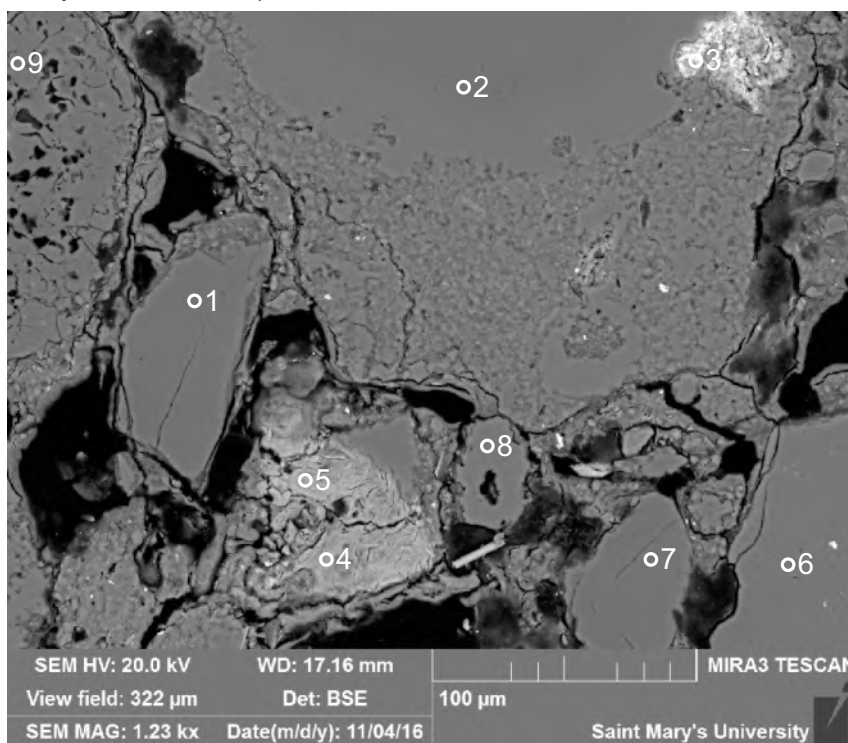

- 1: Quartz
- 2: Quartz
- 3: Mix
- 4: Chlorite + Muscovite
- 5: Chlorite + Muscovite
- 6: Quartz +
- 7: Quartz
- 8: Quartz
- 9: Quartz

Figure A1.25: Sample S1 Site 18 (SEM). This site contains: Detrital quartz (1,2,6-9) with chlorite and muscovite (4-5) and dissolved voids. Lithic clast: altered granite.

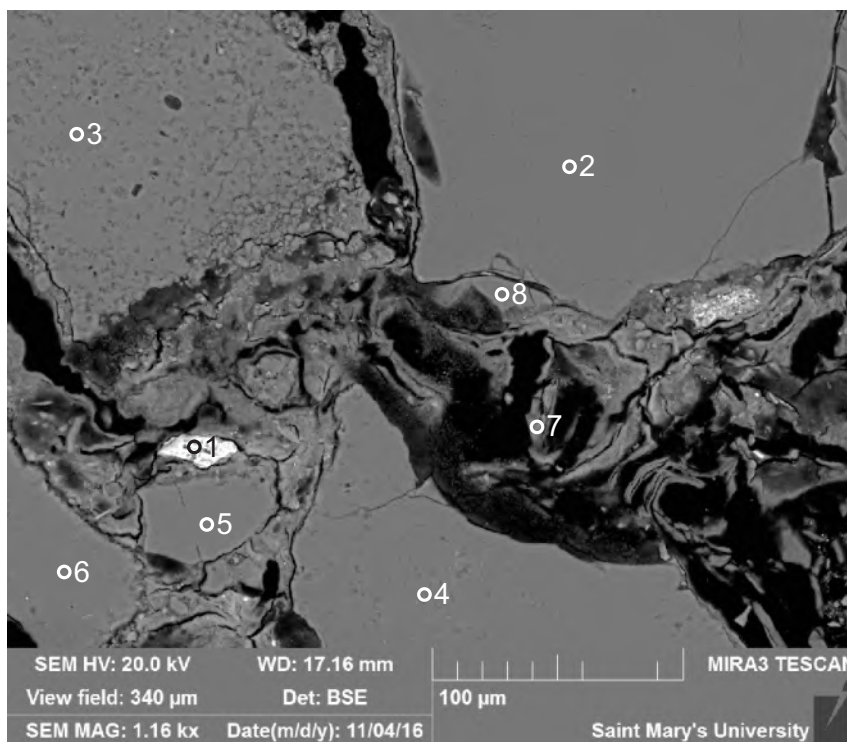

- 1: Fe-oxide/hydroxide +
- 2: Quartz
- 3: Quartz
- 4: Quartz
- 5: Quartz
- 6: Quartz
- 7: Chlorite + Muscovite
- 8: Quartz

Figure A1.26: Sample S1 Site 19 (SEM). This site contains: Detrital quartz (2-6,8), Fe-oxide/hydroxide (1) and chlorite and muscovite (7). Lithic clast: altered granite.

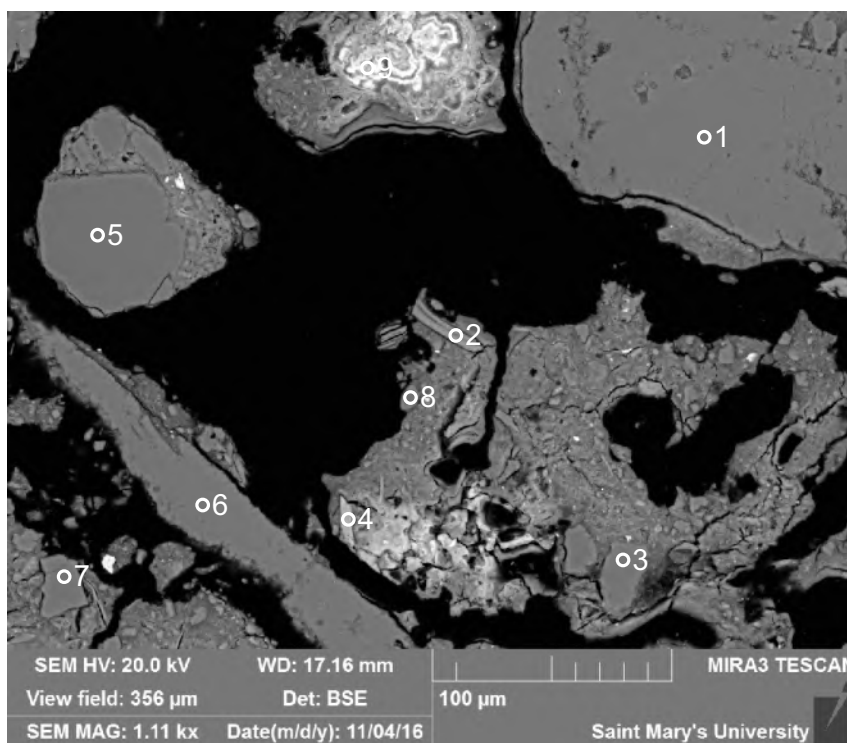

- 1: Quartz
- 2: Muscovite
- 3: Quartz
- 4: "Biotite"
- 5: Quartz
- 6: Quartz
- 7: Quartz
- 8: Quartz
- 9: Fe-Mn-hydroxide

Figure A1.27: Sample S1 Site 20 (SEM). This site contains: Detrital quartz (1, 3, 5, 6, 7, 8) muscovite (2), "biotite" (4), and Fe-Mn-hydroxide. Lithic clast: altered granite.

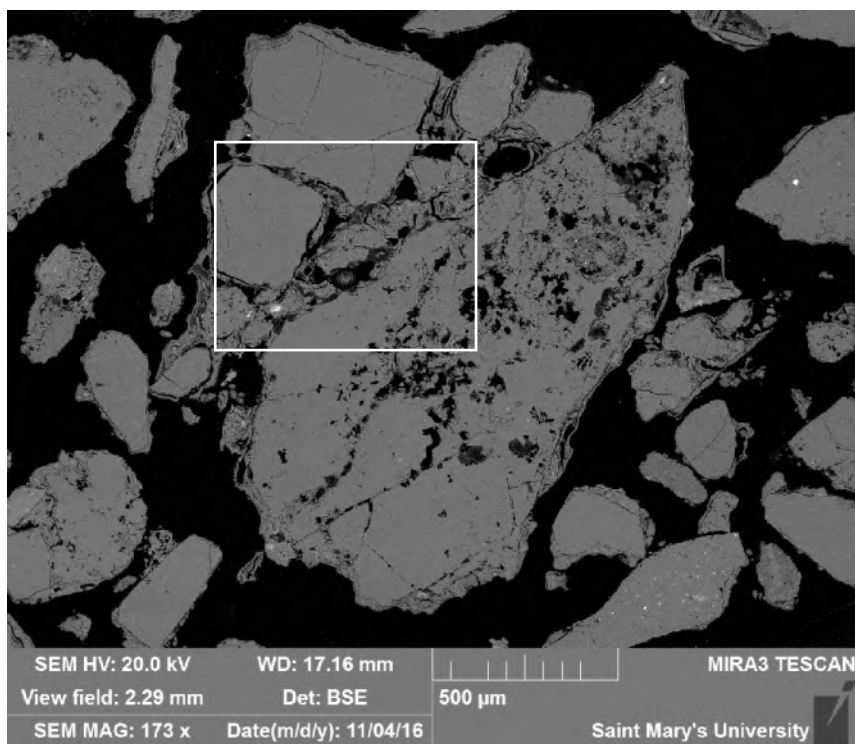

Figure A1.28: Sample S1 (SEM).

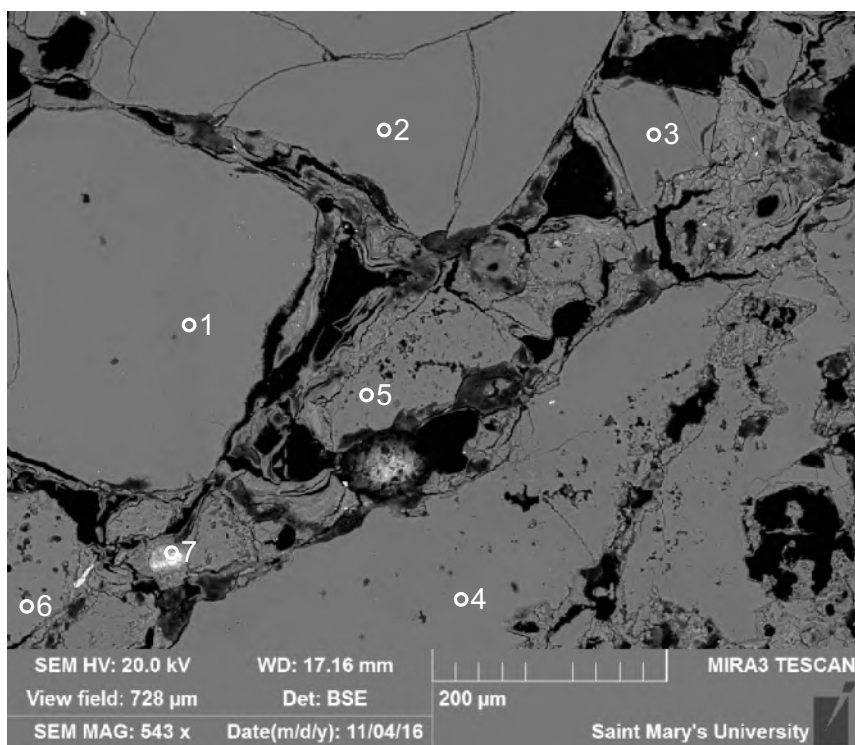

- 1: Quartz
- 2: Quartz
- 3: Quartz
- 4: Quartz
- 5: Quartz
- 6: Quartz
- 7: Mn-hydroxide

Figure A1.29: Sample S1 Site 21 (SEM). This site contains: Detrital quartz (1-6) and Mn-hydroxide (7). Lithic clast: altered granite.



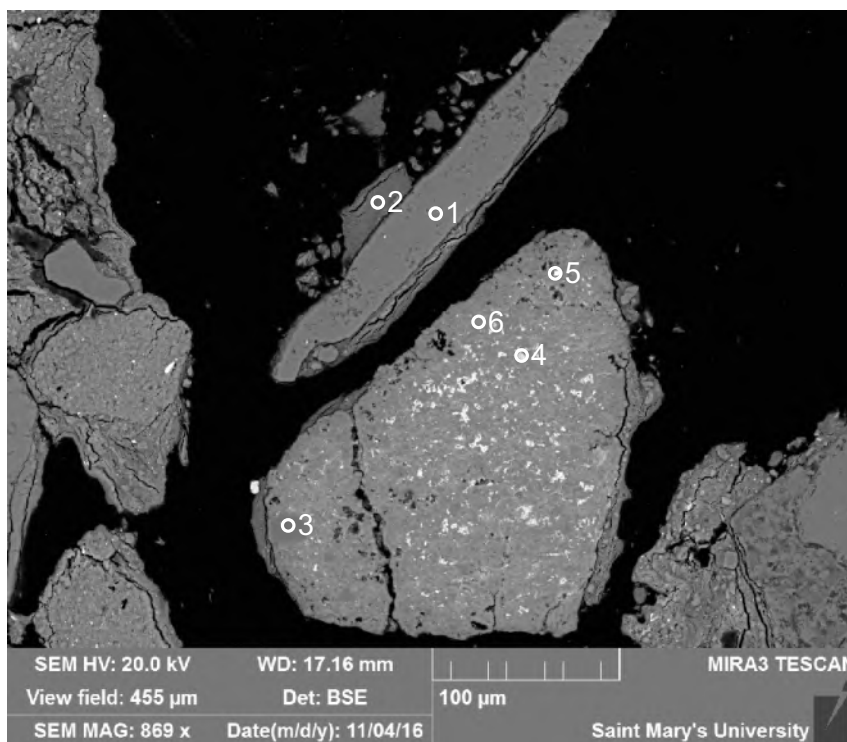

- 1: Quartz
- 2: Muscovite + Chlorite +
- 3: Quartz
- 4: Fe-oxide/hydroxide +
- 5: Chlorite + Cr
- 6: Quartz +

Figure A1.30: Sample S1 Site 22 (SEM). This site contains: Detrital quartz (1, 3, 6) with grains of altered Fe-oxide/hydroxide (4) and Cr-chlorite (5). Lithic clast: mineralized quartz (3-6) grain.

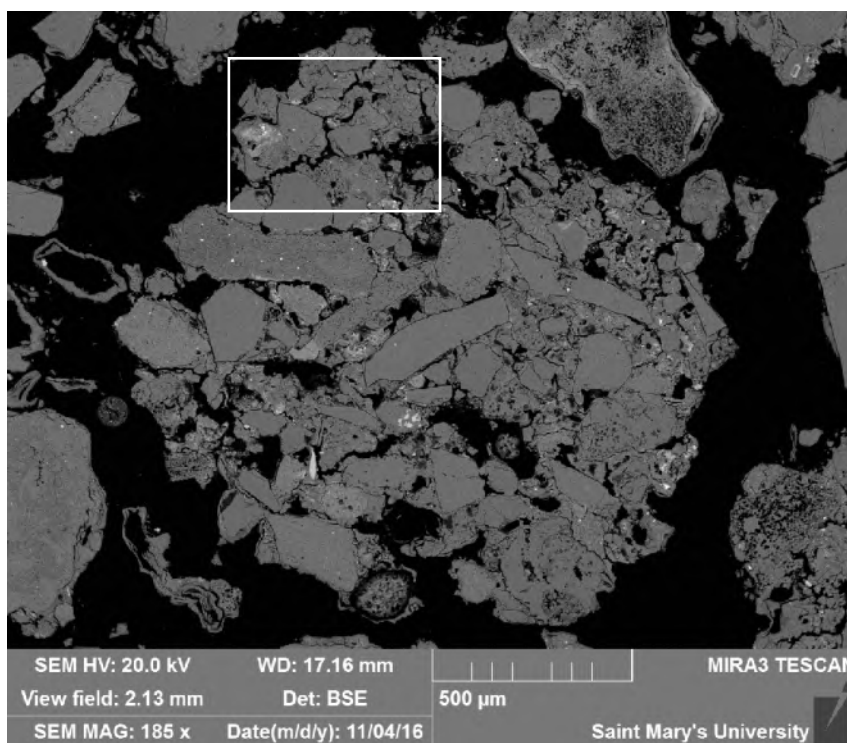

Figure A1.31: Sample S1 (SEM).

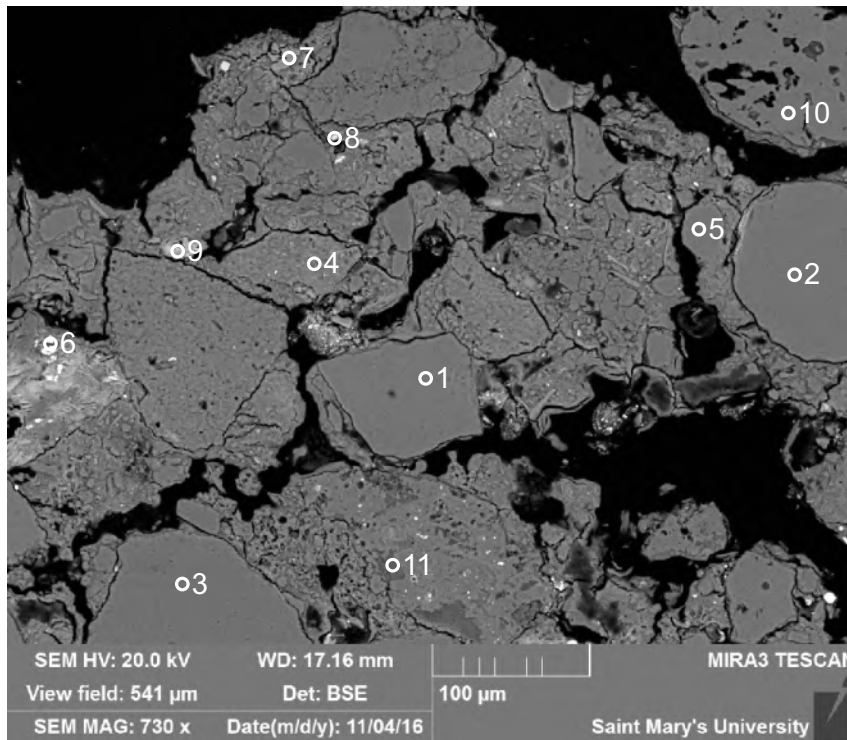

- 1: Quartz
- 2: Quartz
- 3: Quartz
- 4: Quartz + K-feldspar
- 5: Quartz
- 6: Kaolinite + Fe-oxide/hydroxide
- 7: K-Feldspar
- 8:  $\text{TiO}_2$  +
- 9: Mix
- 10: Quartz
- 11: Kaolinite

Figure A1.32: Sample S1 Site 23 (SEM). This site contains: Detrital quartz (1-5, 10), K-feldspar (7) and pedogenic kaolinite (11) and  $\text{TiO}_2$  (8). Lithic clast: altered granite.



Table A1.1: EDS analyses of sample S1.

| Sample | Site | Position | Mineral  | SiO2   | TiO2  | Al2O3 | FeO   | MnO  | MgO  | CaO   | Na2O  | K2O  | P2O5 | SO3 | F | Cl   | V2O5 | Cr2O3 | NiO | CuO  | ZnO | BaO | Total | Actual Total |
|--------|------|----------|----------|--------|-------|-------|-------|------|------|-------|-------|------|------|-----|---|------|------|-------|-----|------|-----|-----|-------|--------------|
| S1     | 1    | 1        | Qz       | 100.00 |       |       |       |      |      |       |       |      |      |     |   |      |      |       |     |      |     |     | 100   | 122          |
| S1     | 1    | 2        | Feho +   | 21.07  |       | 1.56  | 74.77 |      |      |       |       |      | 1.15 |     |   | 0.45 |      |       |     | 0.99 |     |     | 100   | 86           |
| S1     | 1    | 3        | Qz +     | 96.49  |       | 1.64  | 0.77  |      |      | 0.37  | 0.46  | 0.27 |      |     |   |      |      |       |     |      |     |     | 100   | 111          |
| S1     | 1    | 4        | Qz       | 100.00 |       |       |       |      |      |       |       |      |      |     |   |      |      |       |     |      |     |     | 100   | 121          |
| S1     | 2    | 1        | TiO2 +   | 3.04   | 76.30 | 1.42  | 19.03 |      |      | 0.22  |       |      |      |     |   |      |      |       |     |      |     |     | 100   | 100          |
| S1     | 2    | 2        | Ms + Chl | 56.33  |       | 27.07 | 9.61  |      | 2.41 | 0.64  | 0.53  | 3.16 |      |     |   | 0.25 |      |       |     |      |     |     | 100   | 81           |
| S1     | 2    | 3        | Ab       | 69.54  |       | 18.90 |       |      |      | 0.20  | 11.36 |      |      |     |   |      |      |       |     |      |     |     | 100   | 121          |
| S1     | 2    | 4        | Ms + Chl | 60.56  |       | 29.56 | 4.12  |      | 1.97 | 0.73  | 0.85  | 2.22 |      |     |   |      |      |       |     |      |     |     | 100   | 92           |
| S1     | 2    | 5        | Ms + Chl | 56.35  | 1.69  | 26.06 | 8.90  | 0.74 | 2.12 | 0.61  | 0.73  | 2.57 |      |     |   | 0.21 |      |       |     |      |     |     | 100   | 90           |
| S1     | 2    | 6        | Qz       | 100.00 |       |       |       |      |      |       |       |      |      |     |   |      |      |       |     |      |     |     | 100   | 123          |
| S1     | 2    | 7        | Ab       | 69.67  |       | 18.96 |       |      |      |       | 11.37 |      |      |     |   |      |      |       |     |      |     |     | 100   | 119          |
| S1     | 2    | 8        | Ab       | 69.54  |       | 18.88 |       |      |      | 0.30  | 11.28 |      |      |     |   |      |      |       |     |      |     |     | 100   | 120          |
| S1     | 2    | 9        | Qz +     | 90.98  |       | 4.97  | 1.10  |      | 0.72 | 0.32  | 0.33  | 1.58 |      |     |   |      |      |       |     |      |     |     | 100   | 119          |
| S1     | 3    | 1        | Ep       | 41.05  |       | 23.43 | 10.73 | 0.52 |      | 21.27 |       |      |      |     |   |      |      |       |     |      |     |     | 97    | 105          |
| S1     | 3    | 2        | Qz       | 99.09  |       | 0.76  |       |      |      |       |       | 0.16 |      |     |   |      |      |       |     |      |     |     | 100   | 120          |
| S1     | 4    | 1        | Ab       | 69.95  |       | 18.59 |       |      |      |       | 11.46 |      |      |     |   |      |      |       |     |      |     |     | 100   | 121          |
| S1     | 4    | 2        | Ti-Mag   |        | 11.01 | 2.56  | 83.55 | 0.76 | 1.38 |       |       |      |      |     |   |      | 0.72 |       |     |      |     |     | 100   | 97           |
| S1     | 4    | 3        | Qz       | 100.00 |       |       |       |      |      |       |       |      |      |     |   |      |      |       |     |      |     |     | 100   | 123          |
| S1     | 4    | 4        | Ms + Chl | 58.30  | 0.60  | 25.56 | 8.80  |      | 2.21 | 0.89  | 0.51  | 2.85 |      |     |   | 0.28 |      |       |     |      |     |     | 100   | 92           |
| S1     | 4    | 5        | Ms + Chl | 55.15  | 0.55  | 26.07 | 10.75 | 0.26 | 2.07 | 1.37  | 0.44  | 3.33 |      |     |   |      |      |       |     |      |     |     | 100   | 87           |
| S1     | 4    | 6        | Chl      | 32.89  |       | 23.27 | 18.68 |      | 8.48 | 0.36  | 0.60  | 0.71 |      |     |   |      |      |       |     |      |     |     | 85    | 98           |
| S1     | 4    | 7        | Qz       | 100.00 |       |       |       |      |      |       |       |      |      |     |   |      |      |       |     |      |     |     | 100   | 122          |
| S1     | 4    | 8        | Qz       | 100.00 |       |       |       |      |      |       |       |      |      |     |   |      |      |       |     |      |     |     | 100   | 123          |
| S1     | 5    | 1        | Qz       | 100.00 |       |       |       |      |      |       |       |      |      |     |   |      |      |       |     |      |     |     | 100   | 122          |
| S1     | 5    | 2        | Feho +   | 19.79  |       | 1.01  | 78.34 |      |      |       |       |      | 0.86 |     |   |      |      |       |     |      |     |     | 100   | 88           |
| S1     | 5    | 3        | Qz       | 100.00 |       |       |       |      |      |       |       |      |      |     |   |      |      |       |     |      |     |     | 100   | 124          |
| S1     | 5    | 4        | Qz       | 100.00 |       |       |       |      |      |       |       |      |      |     |   |      |      |       |     |      |     |     | 100   | 125          |
| S1     | 5    | 5        | Qz       | 100.00 |       |       |       |      |      |       |       |      |      |     |   |      |      |       |     |      |     |     | 100   | 125          |
| S1     | 5    | 6        | Qz       | 100.00 |       |       |       |      |      |       |       |      |      |     |   |      |      |       |     |      |     |     | 100   | 123          |
| S1     | 5    | 7        | Qz       | 100.00 |       |       |       |      |      |       |       |      |      |     |   |      |      |       |     |      |     |     | 100   | 123          |
| S1     | 5    | 8        | Qz       | 100.00 |       |       |       |      |      |       |       |      |      |     |   |      |      |       |     |      |     |     | 100   | 126          |
| S1     | 6    | 1        | Qz       | 100.00 |       |       |       |      |      |       |       |      |      |     |   |      |      |       |     |      |     |     | 100   | 124          |

Table A1.1: EDS analyses of sample S1.

| Sample | Site | Position | Mineral  | SiO2   | TiO2 | Al2O3 | FeO   | MnO   | MgO  | CaO   | Na2O | K2O  | P2O5 | SO3   | F    | Cl   | V2O5 | Cr2O3 | NiO | CuO | ZnO | BaO  | Total | Actual Total |
|--------|------|----------|----------|--------|------|-------|-------|-------|------|-------|------|------|------|-------|------|------|------|-------|-----|-----|-----|------|-------|--------------|
| S1     | 6    | 2        | Qz       | 99.03  |      | 0.76  | 0.22  |       |      |       |      |      |      |       |      |      |      |       |     |     |     |      | 100   | 120          |
| S1     | 6    | 3        | Chl + Ms | 33.86  | 0.36 | 17.77 | 26.51 | 0.71  | 1.43 | 0.76  | 0.41 | 1.60 | 1.37 |       |      | 0.24 |      |       |     |     |     |      | 85    | 91           |
| S1     | 6    | 4        | Ms + Chl | 51.04  | 0.50 | 25.43 | 16.69 |       | 2.00 | 0.66  | 0.60 | 2.53 | 0.57 |       |      |      |      |       |     |     |     |      | 100   | 97           |
| S1     | 6    | 5        | Chl + Ms | 34.25  |      | 16.57 | 10.43 | 17.73 | 1.35 | 0.69  | 0.41 | 1.85 |      |       |      | 0.26 |      |       |     |     |     | 1.47 | 85    | 97           |
| S1     | 6    | 6        | Qz       | 99.67  |      | 0.33  |       |       |      |       |      |      |      |       |      |      |      |       |     |     |     |      | 100   | 126          |
| S1     | 7    | 1        | Qz       | 98.03  |      | 1.10  | 0.57  |       |      |       |      | 0.29 |      |       |      |      |      |       |     |     |     |      | 100   | 127          |
| S1     | 7    | 2        | Qz       | 97.91  |      | 1.35  | 0.37  |       |      |       |      | 0.37 |      |       |      |      |      |       |     |     |     |      | 100   | 126          |
| S1     | 7    | 3        | Qz       | 100.00 |      |       |       |       |      |       |      |      |      |       |      |      |      |       |     |     |     |      | 100   | 111          |
| S1     | 7    | 4        | Qz       | 100.00 |      |       |       |       |      |       |      |      |      |       |      |      |      |       |     |     |     |      | 100   | 127          |
| S1     | 7    | 5        | Qz       | 100.00 |      |       |       |       |      |       |      |      |      |       |      |      |      |       |     |     |     |      | 100   | 126          |
| S1     | 7    | 6        | Qz       | 100.00 |      |       |       |       |      |       |      |      |      |       |      |      |      |       |     |     |     |      | 100   | 127          |
| S1     | 7    | 7        | Qz       | 100.00 |      |       |       |       |      |       |      |      |      |       |      |      |      |       |     |     |     |      | 100   | 123          |
| S1     | 7    | 8        | Qz       | 100.00 |      |       |       |       |      |       |      |      |      |       |      |      |      |       |     |     |     |      | 100   | 117          |
| S1     | 7    | 9        | Qz +     | 90.50  |      | 5.47  | 1.59  |       | 0.88 |       | 0.29 | 1.27 |      |       |      |      |      |       |     |     |     |      | 100   | 117          |
| S1     | 8    | 1        | Qz       | 100.00 |      |       |       |       |      |       |      |      |      |       |      |      |      |       |     |     |     |      | 100   | 125          |
| S1     | 8    | 2        | Py       | 4.53   |      |       | 27.31 |       |      |       |      |      |      | 68.16 |      |      |      |       |     |     |     |      | 100   | 232          |
| S1     | 8    | 3        | Qz       | 99.69  |      | 0.31  |       |       |      |       |      |      |      |       |      |      |      |       |     |     |     |      | 100   | 124          |
| S1     | 8    | 4        | Qz       | 100.00 |      |       |       |       |      |       |      |      |      |       |      |      |      |       |     |     |     |      | 100   | 124          |
| S1     | 9    | 1        | Qz       | 99.27  |      |       |       |       |      | 0.73  |      |      |      |       |      |      |      |       |     |     |     |      | 100   | 119          |
| S1     | 9    | 2        | Qz       | 100.00 |      |       |       |       |      |       |      |      |      |       |      |      |      |       |     |     |     |      | 100   | 106          |
| S1     | 9    | 3        | Qz + Ab  | 94.71  |      | 2.96  | 0.73  |       |      |       | 1.26 | 0.35 |      |       |      |      |      |       |     |     |     |      | 100   | 106          |
| S1     | 9    | 4        | Qz       | 99.15  |      | 0.64  |       |       |      |       |      | 0.21 |      |       |      |      |      |       |     |     |     |      | 100   | 104          |
| S1     | 9    | 5        | Qz       | 100.00 |      |       |       |       |      |       |      |      |      |       |      |      |      |       |     |     |     |      | 100   | 131          |
| S1     | 9    | 6        | Qz       | 100.00 |      |       |       |       |      |       |      |      |      |       |      |      |      |       |     |     |     |      | 100   | 117          |
| S1     | 9    | 7        | Qz + Kfs | 91.19  |      | 5.51  | 0.99  |       | 0.66 |       |      | 1.65 |      |       |      |      |      |       |     |     |     |      | 100   | 123          |
| S1     | 9    | 8        | Qz       | 100.00 |      |       |       |       |      |       |      |      |      |       |      |      |      |       |     |     |     |      | 100   | 172          |
| S1     | 10   | 1        | Cal+     | 1.68   |      |       |       |       | 0.81 | 93.90 |      |      |      |       | 3.60 |      |      |       |     |     |     |      | 100   | 61           |
| S1     | 10   | 2        | Cal      | 0.61   |      |       |       |       | 0.45 | 53.53 |      |      |      |       | 1.41 |      |      |       |     |     |     |      | 56    | 60           |
| S1     | 10   | 3        | Cal+     | 5.56   |      |       |       |       | 1.07 | 87.82 |      |      |      |       | 5.55 |      |      |       |     |     |     |      | 100   | 65           |
| S1     | 10   | 4        | Qz       | 100.00 |      |       |       |       |      |       |      |      |      |       |      |      |      |       |     |     |     |      | 100   | 135          |
| S1     | 11   | 1        | Qz+      | 79.48  | 0.99 | 9.02  | 4.93  | 0.50  | 1.74 | 0.38  | 0.35 | 2.59 |      |       |      |      |      |       |     |     |     |      | 100   | 113          |
| S1     | 11   | 2        | Qz       | 100.00 |      |       |       |       |      |       |      |      |      |       |      |      |      |       |     |     |     |      | 100   | 120          |

Table A1.1: EDS analyses of sample S1.

| Sample | Site | Position | Mineral       | SiO2   | TiO2  | Al2O3 | FeO   | MnO   | MgO  | CaO  | Na2O | K2O  | P2O5 | SO3 | F    | Cl | V2O5 | Cr2O3 | NiO  | CuO  | ZnO | BaO  | Total | Actual Total |
|--------|------|----------|---------------|--------|-------|-------|-------|-------|------|------|------|------|------|-----|------|----|------|-------|------|------|-----|------|-------|--------------|
| S1     | 11   | 3        | Qz            | 100.00 |       |       |       |       |      |      |      |      |      |     |      |    |      |       |      |      |     |      | 100   | 121          |
| S1     | 11   | 4        | TiO2 +        | 2.12   | 94.63 | 1.28  | 1.66  |       |      | 0.31 |      |      |      |     |      |    |      |       |      |      |     |      | 100   | 105          |
| S1     | 11   | 5        | Mnho +        | 2.00   |       | 6.52  | 6.76  | 70.12 | 0.90 | 1.90 |      |      |      |     | 5.16 |    |      |       | 2.87 | 0.62 |     | 3.15 | 100   | 66           |
| S1     | 11   | 6        | Qz            | 100.00 |       |       |       |       |      |      |      |      |      |     |      |    |      |       |      |      |     |      | 100   | 123          |
| S1     | 11   | 7        | Chl + Ms      | 34.99  | 0.24  | 17.38 | 26.78 | 0.82  | 1.37 | 0.41 | 0.39 | 1.80 | 0.82 |     |      |    |      |       |      |      |     |      | 85    | 97           |
| S1     | 12   | 1        | Qz            | 99.64  |       | 0.36  |       |       |      |      |      |      |      |     |      |    |      |       |      |      |     |      | 100   | 121          |
| S1     | 12   | 2        | Qz            | 95.36  |       | 2.57  | 0.79  |       | 0.48 |      |      | 0.81 |      |     |      |    |      |       |      |      |     |      | 100   | 110          |
| S1     | 12   | 3        | Qz            | 97.67  |       | 1.56  | 0.38  |       |      |      |      | 0.38 |      |     |      |    |      |       |      |      |     |      | 100   | 107          |
| S1     | 12   | 4        | Qz + Ms + Chl | 89.95  |       | 5.48  | 2.00  |       | 0.94 |      | 0.36 | 1.28 |      |     |      |    |      |       |      |      |     |      | 100   | 110          |
| S1     | 12   | 5        | Qz            | 99.47  |       | 0.53  |       |       |      |      |      |      |      |     |      |    |      |       |      |      |     |      | 100   | 129          |
| S1     | 12   | 6        | Qz            | 99.69  |       | 0.31  |       |       |      |      |      |      |      |     |      |    |      |       |      |      |     |      | 100   | 116          |
| S1     | 12   | 7        | Qz            | 99.62  |       | 0.38  |       |       |      |      |      |      |      |     |      |    |      |       |      |      |     |      | 100   | 134          |
| S1     | 12   | 8        | Qz + Ms + Chl | 85.90  | 0.29  | 6.49  | 3.71  |       | 1.25 | 0.21 |      | 2.15 |      |     |      |    |      |       |      |      |     |      | 100   | 129          |
| S1     | 12   | 9        | Qz            | 99.66  |       | 0.34  |       |       |      |      |      |      |      |     |      |    |      |       |      |      |     |      | 100   | 131          |
| S1     | 12   | 10       | Qz            | 99.39  |       | 0.61  |       |       |      |      |      |      |      |     |      |    |      |       |      |      |     |      | 100   | 104          |
| S1     | 12   | 11       | Qz            | 100.00 |       |       |       |       |      |      |      |      |      |     |      |    |      |       |      |      |     |      | 100   | 113          |
| S1     | 13   | 1        | Qz + Ms + Chl | 86.27  |       | 6.98  | 2.76  |       | 1.60 |      | 0.32 | 2.08 |      |     |      |    |      |       |      |      |     |      | 100   | 114          |
| S1     | 13   | 2        | Qz + Ms + Chl | 87.47  |       | 6.29  | 3.00  |       | 1.15 |      | 0.28 | 1.80 |      |     |      |    |      |       |      |      |     |      | 100   | 115          |
| S1     | 13   | 3        | Qz            | 100.00 |       |       |       |       |      |      |      |      |      |     |      |    |      |       |      |      |     |      | 100   | 120          |
| S1     | 13   | 4        | Qz+           | 81.32  | 0.32  | 7.51  | 6.80  | 0.40  | 1.23 | 0.34 | 0.27 | 1.80 |      |     |      |    |      |       |      |      |     |      | 100   | 115          |
| S1     | 13   | 5        | Feho +        | 8.25   |       | 3.96  | 84.30 |       |      |      |      |      | 1.82 |     |      |    |      | 0.45  |      | 1.23 |     |      | 100   | 85           |
| S1     | 13   | 6        | Feho +        | 7.15   |       | 7.50  | 81.29 |       |      |      |      |      | 2.73 |     |      |    |      | 0.34  |      | 1.00 |     |      | 100   | 83           |
| S1     | 13   | 7        | Feho +        | 7.76   |       | 6.18  | 82.65 |       |      | 0.30 |      |      | 2.10 |     |      |    |      |       |      | 1.01 |     |      | 100   | 84           |
| S1     | 14   | 1        | Qz            | 99.69  |       |       | 0.31  |       |      |      |      |      |      |     |      |    |      |       |      |      |     |      | 100   | 119          |
| S1     | 14   | 2        | Feho +        | 7.33   | 0.92  | 1.21  | 88.95 |       |      |      |      |      | 0.82 |     |      |    | 0.43 | 0.34  |      |      |     |      | 100   | 84           |
| S1     | 14   | 3        | Feho +        | 9.45   |       | 1.98  | 87.54 |       |      |      |      |      | 1.03 |     |      |    |      |       |      |      |     |      | 100   | 83           |
| S1     | 14   | 4        | Feho +        | 12.98  |       | 1.06  | 85.09 |       |      |      |      |      | 0.87 |     |      |    |      |       |      |      |     |      | 100   | 87           |
| S1     | 14   | 5        | Feho +        | 8.59   |       | 1.26  | 89.06 |       |      |      |      |      | 1.09 |     |      |    |      |       |      |      |     |      | 100   | 86           |
| S1     | 14   | 6        | Qz            | 100.00 |       |       |       |       |      |      |      |      |      |     |      |    |      |       |      |      |     |      | 100   | 124          |
| S1     | 14   | 7        | Qz            | 100.00 |       |       |       |       |      |      |      |      |      |     |      |    |      |       |      |      |     |      | 100   | 118          |
| S1     | 14   | 8        | Qz            | 100.00 |       |       |       |       |      |      |      |      |      |     |      |    |      |       |      |      |     |      | 100   | 123          |
| S1     | 14   | 9        | Ms + Chl      | 55.07  | 0.46  | 28.11 | 9.34  |       | 2.38 | 0.57 | 0.43 | 3.64 |      |     |      |    |      |       |      |      |     |      | 100   | 91           |

Table A1.1: EDS analyses of sample S1.

| Sample | Site | Position | Mineral       | SiO2   | TiO2 | Al2O3 | FeO   | MnO   | MgO  | CaO  | Na2O | K2O   | P2O5 | SO3 | F | Cl   | V2O5 | Cr2O3 | NiO  | CuO | ZnO | BaO | Total | Actual Total |
|--------|------|----------|---------------|--------|------|-------|-------|-------|------|------|------|-------|------|-----|---|------|------|-------|------|-----|-----|-----|-------|--------------|
| S1     | 15   | 1        | Ms + Chl      | 54.82  | 0.69 | 27.90 | 10.12 |       | 2.35 | 0.40 | 0.51 | 3.20  |      |     |   |      |      |       |      |     |     |     | 100   | 90           |
| S1     | 15   | 2        | Qz + Ms + Chl | 82.72  | 0.25 | 6.74  | 5.62  |       | 1.97 |      |      | 2.71  |      |     |   |      |      |       |      |     |     |     | 100   | 110          |
| S1     | 15   | 3        | Qz + Ms + Chl | 84.48  |      | 6.91  | 3.62  |       | 1.92 | 0.29 | 0.27 | 2.51  |      |     |   |      |      |       |      |     |     |     | 100   | 110          |
| S1     | 15   | 4        | Qz            | 100.00 |      |       |       |       |      |      |      |       |      |     |   |      |      |       |      |     |     |     | 100   | 119          |
| S1     | 16   | 1        | Kfs           | 66.21  |      | 17.78 |       |       |      |      | 0.70 | 15.31 |      |     |   |      |      |       |      |     |     |     | 100   | 115          |
| S1     | 16   | 2        | Qz            | 98.97  |      |       |       |       |      | 1.03 |      |       |      |     |   |      |      |       |      |     |     |     | 100   | 116          |
| S1     | 16   | 3        | Qz            | 100.00 |      |       |       |       |      |      |      |       |      |     |   |      |      |       |      |     |     |     | 100   | 119          |
| S1     | 16   | 4        | Qz            | 100.00 |      |       |       |       |      |      |      |       |      |     |   |      |      |       |      |     |     |     | 100   | 118          |
| S1     | 16   | 5        | Qz            | 100.00 |      |       |       |       |      |      |      |       |      |     |   |      |      |       |      |     |     |     | 100   | 119          |
| S1     | 16   | 6        | Qz            | 100.00 |      |       |       |       |      |      |      |       |      |     |   |      |      |       |      |     |     |     | 100   | 118          |
| S1     | 16   | 7        | Qz            | 99.64  |      | 0.36  |       |       |      |      |      |       |      |     |   |      |      |       |      |     |     |     | 100   | 118          |
| S1     | 16   | 8        | Kfs + Chl     | 64.54  | 0.32 | 19.77 | 9.35  |       | 2.07 | 0.64 | 0.58 | 2.57  |      |     |   | 0.17 |      |       |      |     |     |     | 100   | 88           |
| S1     | 16   | 9        | Qz            | 100.00 |      |       |       |       |      |      |      |       |      |     |   |      |      |       |      |     |     |     | 100   | 113          |
| S1     | 17   | 1        | Qz            | 100.00 |      |       |       |       |      |      |      |       |      |     |   |      |      |       |      |     |     |     | 100   | 120          |
| S1     | 17   | 2        | Qz            | 100.00 |      |       |       |       |      |      |      |       |      |     |   |      |      |       |      |     |     |     | 100   | 122          |
| S1     | 17   | 3        | Chl + Mnho    | 29.39  | 0.45 | 11.45 | 10.51 | 27.10 | 1.54 | 1.33 | 0.78 | 2.09  |      |     |   |      |      |       | 0.36 |     |     |     | 85    | 89           |
| S1     | 17   | 4        | Qz            | 100.00 |      |       |       |       |      |      |      |       |      |     |   |      |      |       |      |     |     |     | 100   | 121          |
| S1     | 17   | 5        | Chl + Mnho    | 32.41  | 0.43 | 12.81 | 8.28  | 25.62 | 1.29 | 1.30 | 0.60 | 1.90  |      |     |   |      |      |       | 0.37 |     |     |     | 85    | 96           |
| S1     | 17   | 6        | Chl + Mnho    | 30.19  | 0.43 | 13.00 | 10.76 | 24.84 | 1.33 | 1.43 | 0.78 | 1.84  |      |     |   |      |      |       | 0.40 |     |     |     | 85    | 87           |
| S1     | 17   | 7        | Chl + Mnho    | 51.97  | 0.43 | 11.64 | 9.51  | 21.09 | 1.24 | 1.07 | 0.51 | 1.87  |      |     |   | 0.29 |      |       | 0.38 |     |     |     | 100   | 97           |
| S1     | 17   | 8        | Qz            | 100.00 |      |       |       |       |      |      |      |       |      |     |   |      |      |       |      |     |     |     | 100   | 122          |
| S1     | 17   | 9        | Qz            | 100.00 |      |       |       |       |      |      |      |       |      |     |   |      |      |       |      |     |     |     | 100   | 121          |
| S1     | 17   | 10       | Qz            | 100.00 |      |       |       |       |      |      |      |       |      |     |   |      |      |       |      |     |     |     | 100   | 123          |
| S1     | 17   | 11       | Kfs           | 68.40  |      | 16.79 |       |       |      |      | 0.62 | 14.19 |      |     |   |      |      |       |      |     |     |     | 100   | 118          |
| S1     | 17   | 12       | Qz +          | 90.03  |      | 4.98  | 2.04  |       | 1.02 | 0.22 | 0.31 | 1.40  |      |     |   |      |      |       |      |     |     |     | 100   | 115          |
| S1     | 18   | 1        | Qz            | 100.00 |      |       |       |       |      |      |      |       |      |     |   |      |      |       |      |     |     |     | 100   | 118          |
| S1     | 18   | 2        | Qz            | 100.00 |      |       |       |       |      |      |      |       |      |     |   |      |      |       |      |     |     |     | 100   | 118          |
| S1     | 18   | 3        | Mix           | 18.66  |      | 5.40  | 72.17 |       | 0.95 |      | 0.92 | 0.34  | 1.56 |     |   |      |      |       |      |     |     |     | 100   | 82           |
| S1     | 18   | 4        | Chl + Ms      | 36.52  | 0.61 | 21.69 | 18.94 |       | 4.05 | 0.48 | 0.60 | 2.10  |      |     |   |      |      |       |      |     |     |     | 85    | 100          |
| S1     | 18   | 5        | Chl + Ms      | 33.50  |      | 20.51 | 23.12 |       | 4.85 | 0.37 | 0.43 | 2.23  |      |     |   |      |      |       |      |     |     |     | 85    | 90           |
| S1     | 18   | 6        | Qz+           | 86.80  |      | 8.30  | 1.09  |       | 1.05 |      |      | 2.77  |      |     |   |      |      |       |      |     |     |     | 100   | 119          |
| S1     | 18   | 7        | Qz            | 100.00 |      |       |       |       |      |      |      |       |      |     |   |      |      |       |      |     |     |     | 100   | 121          |

Table A1.1: EDS analyses of sample S1.

| Sample | Site | Position | Mineral    | SiO2   | TiO2 | Al2O3 | FeO   | MnO   | MgO  | CaO  | Na2O | K2O  | P2O5 | SO3 | F    | Cl   | V2O5 | Cr2O3 | NiO  | CuO  | ZnO  | BaO  | Total | Actual Total |
|--------|------|----------|------------|--------|------|-------|-------|-------|------|------|------|------|------|-----|------|------|------|-------|------|------|------|------|-------|--------------|
| S1     | 18   | 8        | Qz         | 100.00 |      |       |       |       |      |      |      |      |      |     |      |      |      |       |      |      |      |      | 100   | 119          |
| S1     | 18   | 9        | Qz         | 99.76  |      |       |       |       |      | 0.24 |      |      |      |     |      |      |      |       |      |      |      |      | 100   | 119          |
| S1     | 19   | 1        | Feho +     | 4.35   |      | 3.69  | 90.91 |       |      |      |      |      | 1.05 |     |      |      |      |       |      |      |      |      | 100   | 76           |
| S1     | 19   | 2        | Qz         | 100.00 |      |       |       |       |      |      |      |      |      |     |      |      |      |       |      |      |      |      | 100   | 118          |
| S1     | 19   | 3        | Qz         | 99.55  |      | 0.45  |       |       |      |      |      |      |      |     |      |      |      |       |      |      |      |      | 100   | 117          |
| S1     | 19   | 4        | Qz         | 98.28  |      | 0.91  | 0.61  |       |      |      |      | 0.20 |      |     |      |      |      |       |      |      |      |      | 100   | 119          |
| S1     | 19   | 5        | Qz         | 100.00 |      |       |       |       |      |      |      |      |      |     |      |      |      |       |      |      |      |      | 100   | 119          |
| S1     | 19   | 6        | Qz         | 98.58  |      | 0.92  | 0.31  |       |      |      |      | 0.19 |      |     |      |      |      |       |      |      |      |      | 100   | 117          |
| S1     | 19   | 7        | Chl + Ms   | 46.58  | 0.31 | 23.32 | 8.08  |       | 2.18 | 0.73 | 0.77 | 2.73 |      |     |      | 0.29 |      |       |      |      |      |      | 85    | 77           |
| S1     | 19   | 8        | Qz         | 100.00 |      |       |       |       |      |      |      |      |      |     |      |      |      |       |      |      |      |      | 100   | 117          |
| S1     | 20   | 1        | Qz         | 100.00 |      |       |       |       |      |      |      |      |      |     |      |      |      |       |      |      |      |      | 100   | 117          |
| S1     | 20   | 2        | Ms         | 48.97  | 0.69 | 32.12 | 1.62  |       | 1.43 |      | 1.22 | 8.96 |      |     |      |      |      |       |      |      |      |      | 95    | 105          |
| S1     | 20   | 3        | Qz         | 100.00 |      |       |       |       |      |      |      |      |      |     |      |      |      |       |      |      |      |      | 100   | 121          |
| S1     | 20   | 4        | "Bt"       | 37.57  | 2.47 | 15.47 | 28.92 | 0.68  | 4.75 |      | 0.53 | 5.02 | 0.59 |     |      |      |      |       |      |      |      |      | 96    | 94           |
| S1     | 20   | 5        | Qz         | 100.00 |      |       |       |       |      |      |      |      |      |     |      |      |      |       |      |      |      |      | 100   | 118          |
| S1     | 20   | 6        | Qz         | 99.68  |      | 0.32  |       |       |      |      |      |      |      |     |      |      |      |       |      |      |      |      | 100   | 117          |
| S1     | 20   | 7        | Qz         | 100.00 |      |       |       |       |      |      |      |      |      |     |      |      |      |       |      |      |      |      | 100   | 120          |
| S1     | 20   | 8        | Qz         | 100.00 |      |       |       |       |      |      |      |      |      |     |      |      |      |       |      |      |      |      | 100   | 120          |
| S1     | 20   | 9        | Fe-Mnho +  | 15.76  |      | 7.13  | 12.70 | 51.18 | 0.62 | 0.99 |      | 1.26 |      |     | 5.71 |      |      |       | 0.90 |      |      | 3.74 | 100   | 67           |
| S1     | 21   | 1        | Qz         | 100.00 |      |       |       |       |      |      |      |      |      |     |      |      |      |       |      |      |      |      | 100   | 118          |
| S1     | 21   | 2        | Qz         | 100.00 |      |       |       |       |      |      |      |      |      |     |      |      |      |       |      |      |      |      | 100   | 117          |
| S1     | 21   | 3        | Qz         | 100.00 |      |       |       |       |      |      |      |      |      |     |      |      |      |       |      |      |      |      | 100   | 116          |
| S1     | 21   | 4        | Qz         | 99.74  |      |       |       |       |      |      |      |      |      |     |      |      |      |       |      |      | 0.26 |      | 100   | 119          |
| S1     | 21   | 5        | Qz         | 99.73  |      |       |       |       |      |      |      |      |      |     |      |      |      |       |      |      | 0.27 |      | 100   | 117          |
| S1     | 21   | 6        | Qz         | 100.00 |      |       |       |       |      |      |      |      |      |     |      |      |      |       |      |      |      |      | 100   | 116          |
| S1     | 21   | 7        | Mnho       | 7.14   |      | 4.29  | 6.61  | 71.11 | 1.21 | 1.82 |      |      |      |     |      | 0.38 |      |       | 1.95 | 0.61 |      | 4.89 | 100   | 66           |
| S1     | 22   | 1        | Qz         | 96.93  |      | 1.47  | 1.28  |       |      |      |      | 0.33 |      |     |      |      |      |       |      |      |      |      | 100   | 120          |
| S1     | 22   | 2        | Ms + Chl + | 57.50  | 0.40 | 28.91 | 7.54  |       | 2.05 | 0.50 | 0.48 | 2.63 |      |     |      |      |      |       |      |      |      |      | 100   | 92           |
| S1     | 22   | 3        | Qz         | 99.82  |      |       | 0.18  |       |      |      |      |      |      |     |      |      |      |       |      |      |      |      | 100   | 121          |
| S1     | 22   | 4        | Feho +     | 39.30  |      | 4.10  | 54.10 |       |      |      |      | 0.24 | 1.44 |     |      |      |      | 0.48  |      |      | 0.33 |      | 100   | 91           |
| S1     | 22   | 5        | Chl + Cr   | 13.34  |      | 13.39 | 16.04 |       | 7.65 |      |      |      |      |     |      |      |      | 45.53 |      |      | 4.05 |      | 100   | 112          |
| S1     | 22   | 6        | Qz +       | 85.86  | 0.49 | 3.53  | 8.80  |       | 0.54 |      |      | 0.79 |      |     |      |      |      |       |      |      |      |      | 100   | 112          |



Table A1.1: EDS analyses of sample S1.

| Sample | Site | Position | Mineral                                       | SiO2   | TiO2  | Al2O3 | FeO   | MnO   | MgO  | CaO  | Na2O | K2O   | P2O5 | SO3 | F    | Cl | V2O5 | Cr2O3 | NiO  | CuO | ZnO | BaO  | Total | Actual Total |
|--------|------|----------|-----------------------------------------------|--------|-------|-------|-------|-------|------|------|------|-------|------|-----|------|----|------|-------|------|-----|-----|------|-------|--------------|
| S1     | 23   | 1        | Qz                                            | 100.00 |       |       |       |       |      |      |      |       |      |     |      |    |      |       |      |     |     |      | 100   | 137          |
| S1     | 23   | 2        | Qz                                            | 100.00 |       |       |       |       |      |      |      |       |      |     |      |    |      |       |      |     |     |      | 100   | 138          |
| S1     | 23   | 3        | Qz                                            | 100.00 |       |       |       |       |      |      |      |       |      |     |      |    |      |       |      |     |     |      | 100   | 134          |
| S1     | 23   | 4        | Qz + Kfs                                      | 87.05  |       | 6.31  | 3.34  |       | 1.28 |      | 0.38 | 1.64  |      |     |      |    |      |       |      |     |     |      | 100   | 114          |
| S1     | 23   | 5        | Qz                                            | 97.61  |       | 1.36  | 0.60  | 0.23  |      |      |      | 0.21  |      |     |      |    |      |       |      |     |     |      | 100   | 115          |
| S1     | 23   | 6        | Kln + Feho                                    | 52.48  |       | 24.54 | 19.37 |       | 0.93 | 0.43 | 0.89 | 0.76  | 0.59 |     |      |    |      |       |      |     |     |      | 100   | 97           |
| S1     | 23   | 7        | Kfs                                           | 65.94  |       | 17.90 | 0.24  |       |      |      | 0.60 | 15.32 |      |     |      |    |      |       |      |     |     |      | 100   | 114          |
| S1     | 23   | 8        | TiO2 +                                        | 10.37  | 81.03 | 4.23  | 2.86  |       |      | 0.28 |      | 0.73  |      |     |      |    |      | 0.50  |      |     |     |      | 100   | 100          |
| S1     | 23   | 9        | Mix                                           | 19.86  |       | 8.34  | 9.89  | 49.58 | 0.99 | 1.25 |      | 0.87  |      |     | 5.37 |    |      |       | 1.28 |     |     | 2.57 | 100   | 66           |
| S1     | 23   | 10       | Qz                                            | 99.65  |       | 0.35  |       |       |      |      |      |       |      |     |      |    |      |       |      |     |     |      | 100   | 116          |
| S1     | 23   | 11       | Kln                                           | 56.64  |       | 42.29 | 0.55  |       |      | 0.26 | 0.27 |       |      |     |      |    |      |       |      |     |     |      | 100   | 97           |
|        |      |          |                                               |        |       |       |       |       |      |      |      |       |      |     |      |    |      |       |      |     |     |      |       |              |
|        |      |          | Note                                          |        |       |       |       |       |      |      |      |       |      |     |      |    |      |       |      |     |     |      |       |              |
|        |      |          | + = indicates that other minerals are present |        |       |       |       |       |      |      |      |       |      |     |      |    |      |       |      |     |     |      |       |              |
|        |      |          | Feho = Fe-oxide/hydroxide                     |        |       |       |       |       |      |      |      |       |      |     |      |    |      |       |      |     |     |      |       |              |
|        |      |          | Mnho = Mn-oxide/hydroxide                     |        |       |       |       |       |      |      |      |       |      |     |      |    |      |       |      |     |     |      |       |              |
|        |      |          |                                               |        |       |       |       |       |      |      |      |       |      |     |      |    |      |       |      |     |     |      |       |              |
|        |      |          |                                               |        |       |       |       |       |      |      |      |       |      |     |      |    |      |       |      |     |     |      |       |              |
|        |      |          |                                               |        |       |       |       |       |      |      |      |       |      |     |      |    |      |       |      |     |     |      |       |              |

A2: SEM-BSE images and EDS  
mineral analyses for sample S9

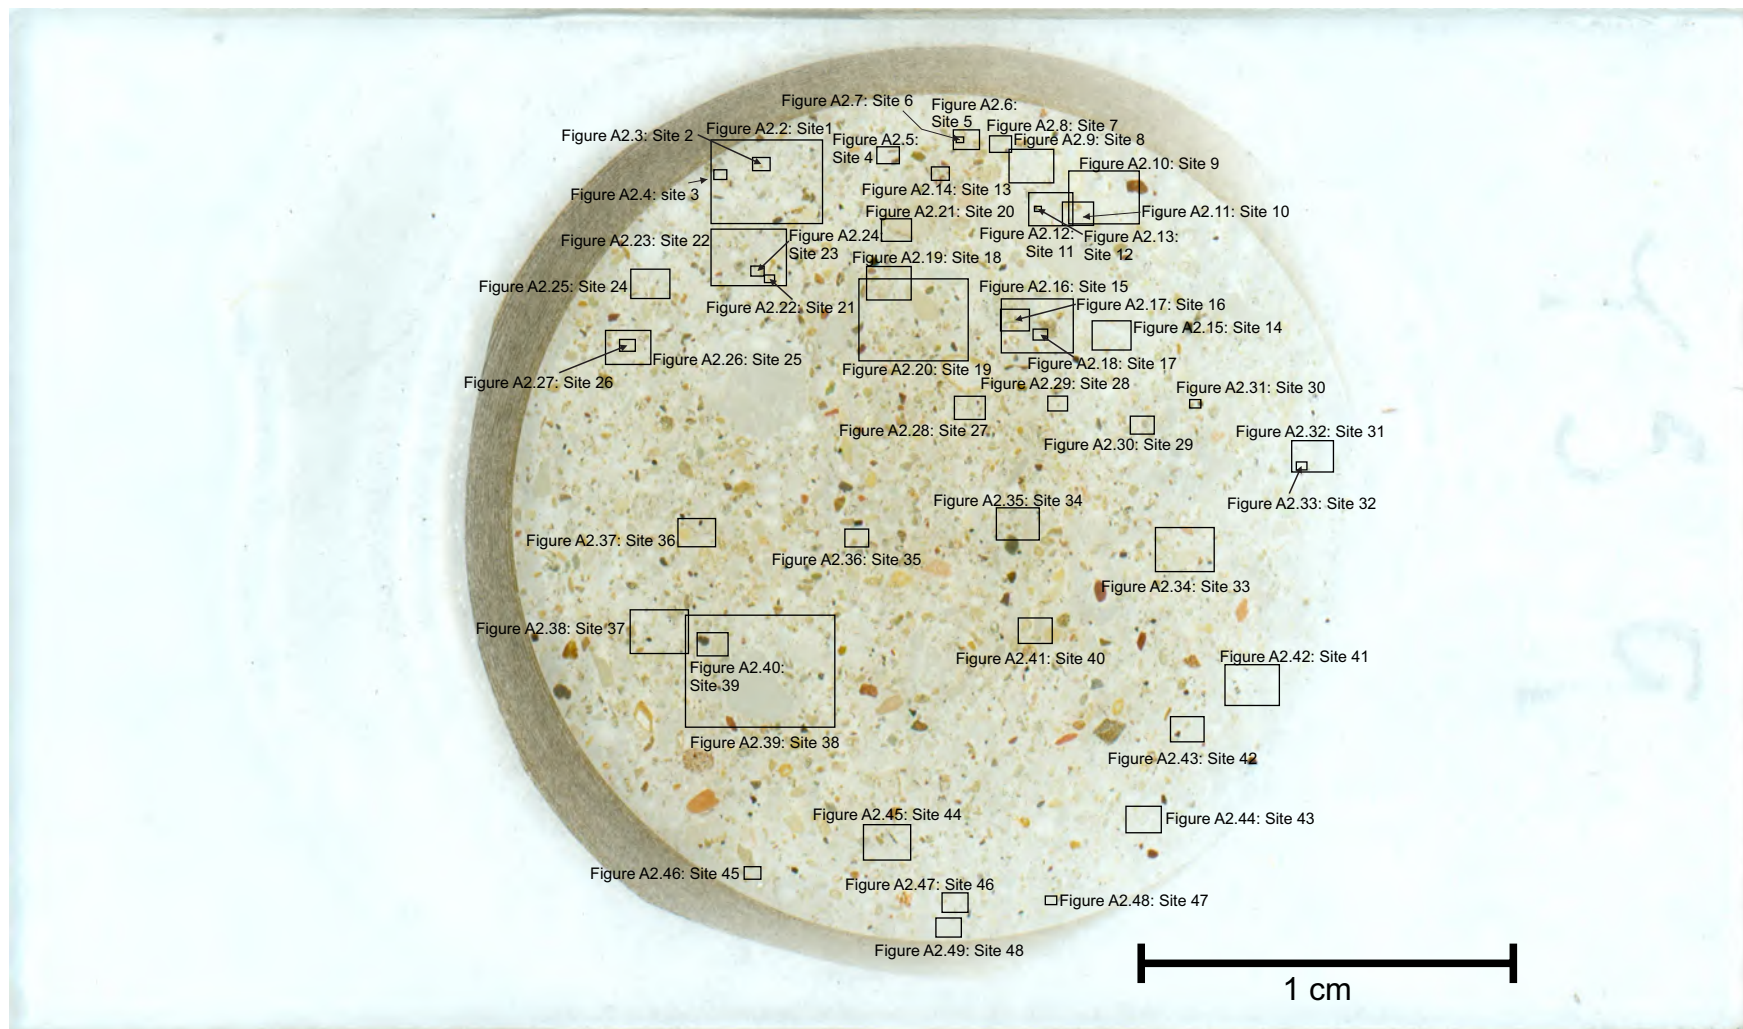

Figure A2:1: Slide S9: Medium to coarse grained sand taken from Upper Arachthos River on the lee side of boulders.

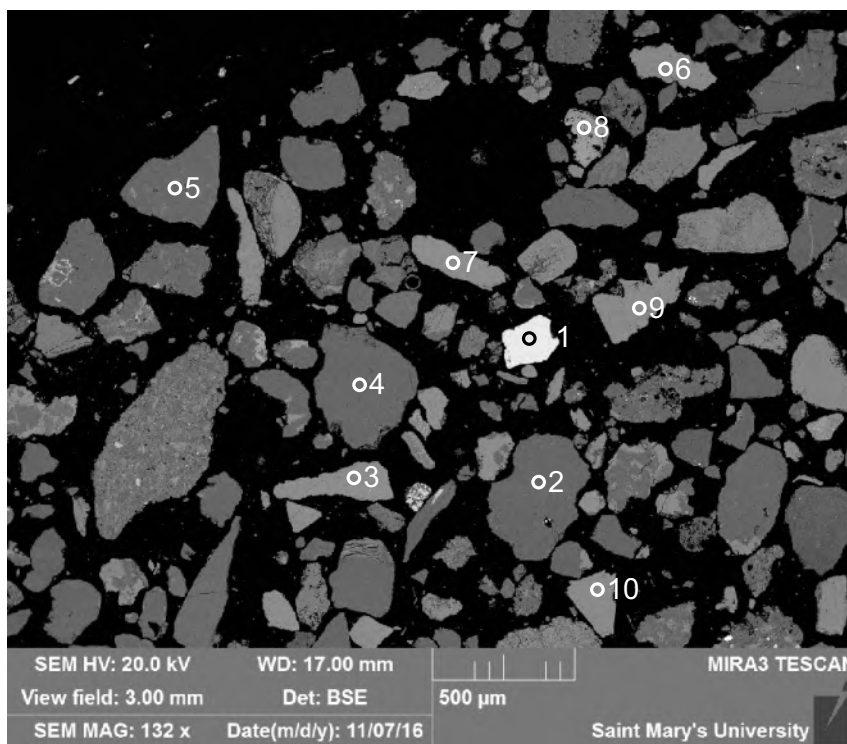

- 1: Chromite
- 2: Quartz
- 3: Calcite
- 4: Quartz
- 5: Quartz
- 6: Calcite
- 7: Calcite
- 8: Clinopyroxene
- 9: Calcite
- 10: Calcite

Figure A2.2: Sample S9 Site 1 (SEM). This site contains: Detrital chromite (1), quartz (2,4,5), calcite (3,6,7,9,10), and clinopyroxene (8).

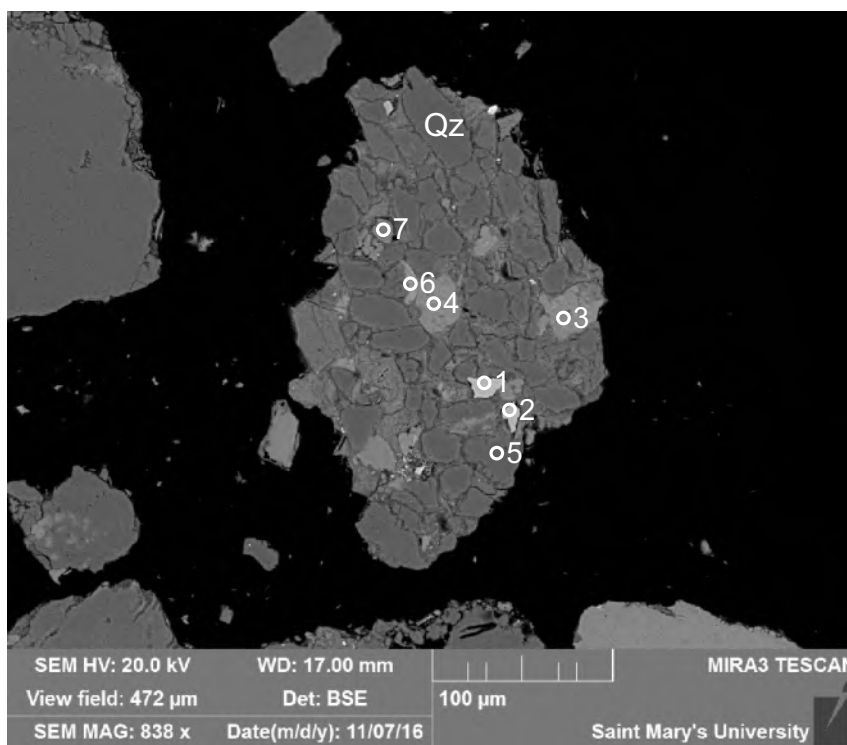

- 1: Garnet (alm)
- 2: Garnet (alm)
- 3: Calcite
- 4: Calcite+
- 5: Albite
- 6: Chlorite
- 7: K-Feldspar

Figure A2.3: Sample S9 Site 2 (SEM). This site contains: Detrital garnet (1, 2), calcite (3, 4), albite (5), chlorite (6) and K-Feldspar (7). Lithic clase: Quartz + Garnet + Calcite + Albite + K-feldspar (1-7, sandstone based on texture).

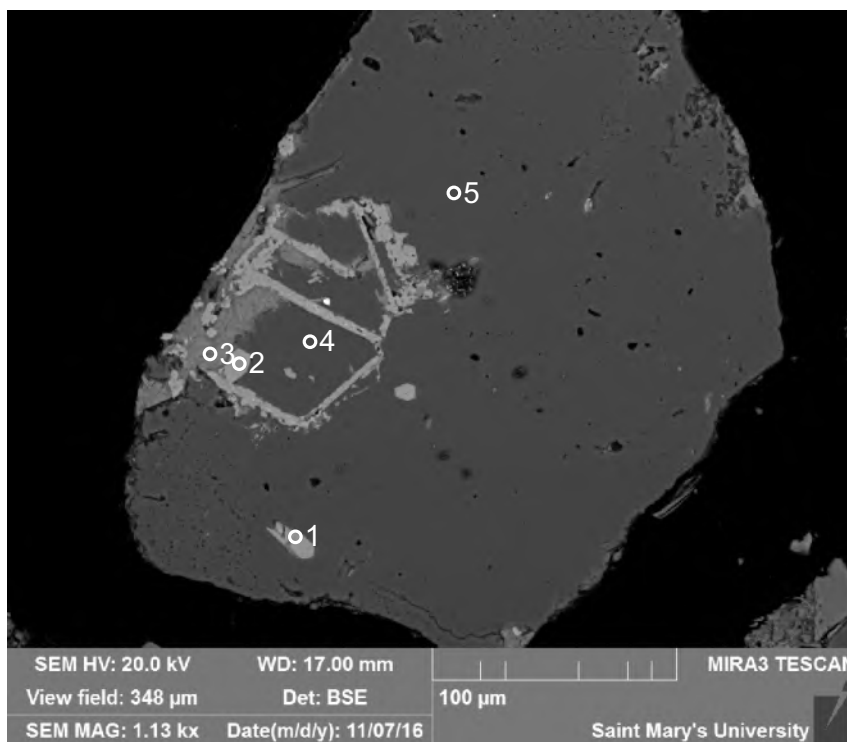

- 1: Apatite
- 2: Titanite
- 3: Chlorite
- 4: Quartz
- 5: Quartz

Figure A2.4: Sample S9 Site 3 (SEM). This site contains: Detrital quartz grain (4, 5) with apatite (1) inclusion and cut by titanite (2) and chlorite (3).

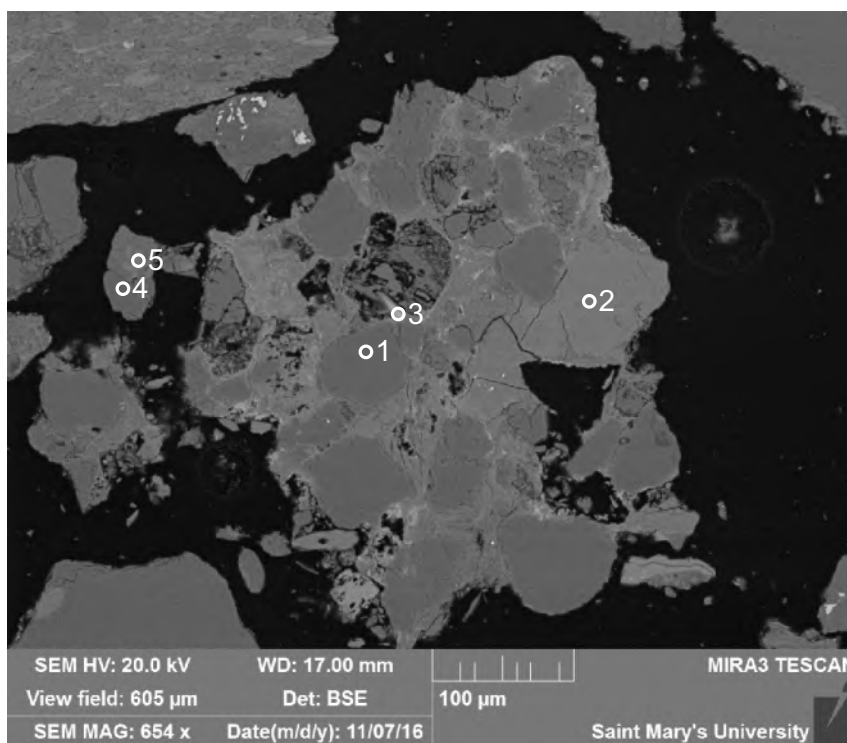

- 1: Quartz
- 2: K-Feldspar
- 3:  $\text{TiO}_2$
- 4: Quartz
- 5: Calcite+

Figure A2.5: Sample S9 Site 4 (SEM). This site contains: Detrital quartz (1), K-Feldspar (2),  $\text{TiO}_2$  (3), and calcite (5). Lithic clasts: Quartz + Calcite (4-5, cherty limestone); Quartz + K-feldspar + Rutile (1-3, calcareous sandstone).



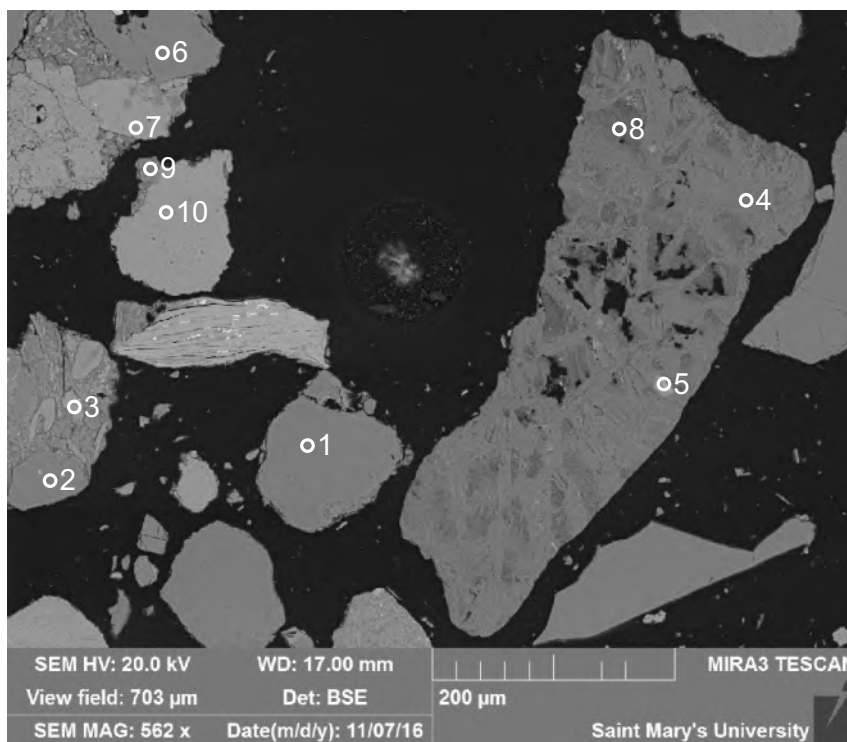

- 1: Quartz
- 2: Quartz
- 3: Calcite+
- 4: Orthopyroxene
- 5: Mix with Ni
- 6: Quartz
- 7: Calcite
- 8: Orthopyroxene
- 9: Quartz
- 10: Calcite

Figure A2.6: Sample S9 Site 5 (SEM). This site contains: Detrital quartz (1,2,6,9), calcite (3,7,10), and orthopyroxene (4,8). Lithic clasts: Quartz + Calcite (6-7,9-10, cherty limestone); Orthopyroxene + ? (4,-5,8, peridotite).

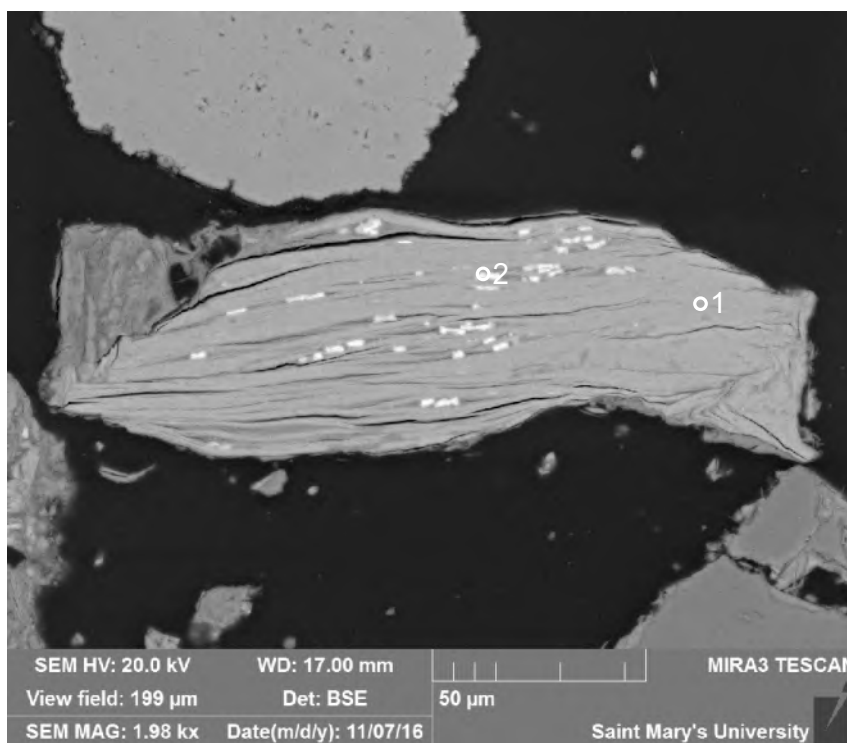

- 1: Chlorite
- 2: Fe-oxide/hydroxide + Chlorite

Figure A2.7: Sample S9 Site 6 (SEM). This site contains: Detrital chlorite (1) with grains of Fe-oxide/hydroxide along its cleavage, from metamorphic rock (2).

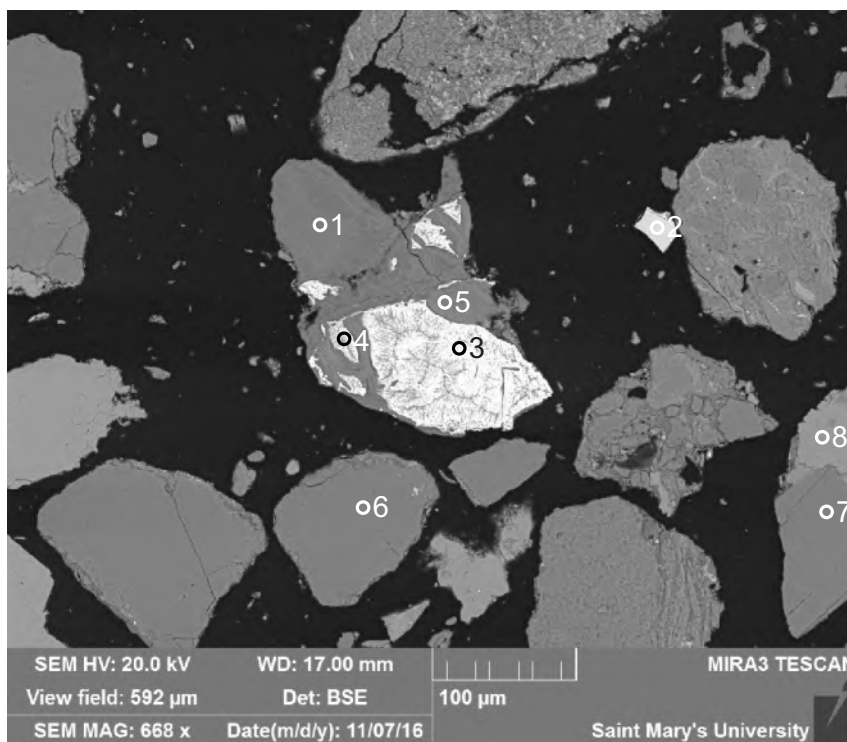

- 1: "Olivine"
- 2: Chromite
- 3: "Chromite" +
- 4: "Chromite" +
- 5: "Olivine"
- 6: Quartz
- 7: Albite
- 8: Calcite

Figure A2.8: Sample S9 Site 7 (SEM). This site contains: Detrital altered olivine (1, 5), altered chromite (3, 4), chromite (2), quartz (6), albite (7) and calcite (8). Lithic clasts: Olivine + Chromite (1,3-5, serpentinite); Calcite + Albite (7-8, sandy limestone).

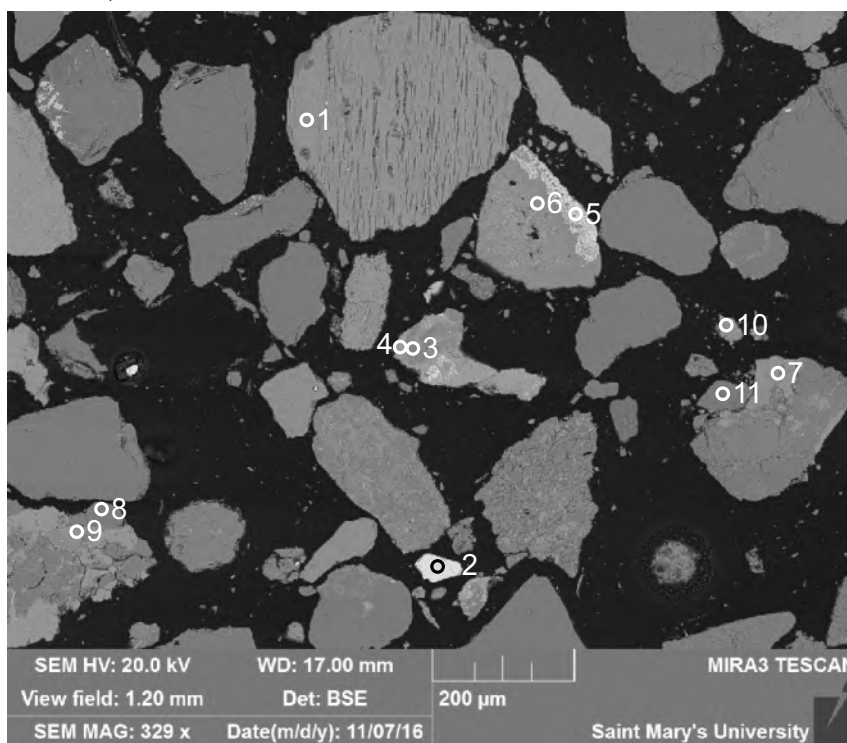

- 1: K-Feldspar (perthite)
- 2: Chromite
- 3: Albite
- 4: Chlorite
- 5: Chlorite
- 6: K-Feldspar +
- 7: Albite
- 8: Quartz
- 9: K-Feldspar
- 10: Calcite
- 11: Quartz

Figure A2.9: Sample S9 Site 8 (SEM). This site contains: Detrital K-feldspar (1, 6, 9), chromite (2), albite (3, 7), quartz (8,11), calcite (10), and chlorite (4-5). Lithic clasts: K-feldspar + Chlorite (5-6, igneous); Albite + Chlorite (3-4, metamorphic); Quartz + K-feldspar (8-9, igneous); Quartz + Albite (7,11, igneous or metamorphic).

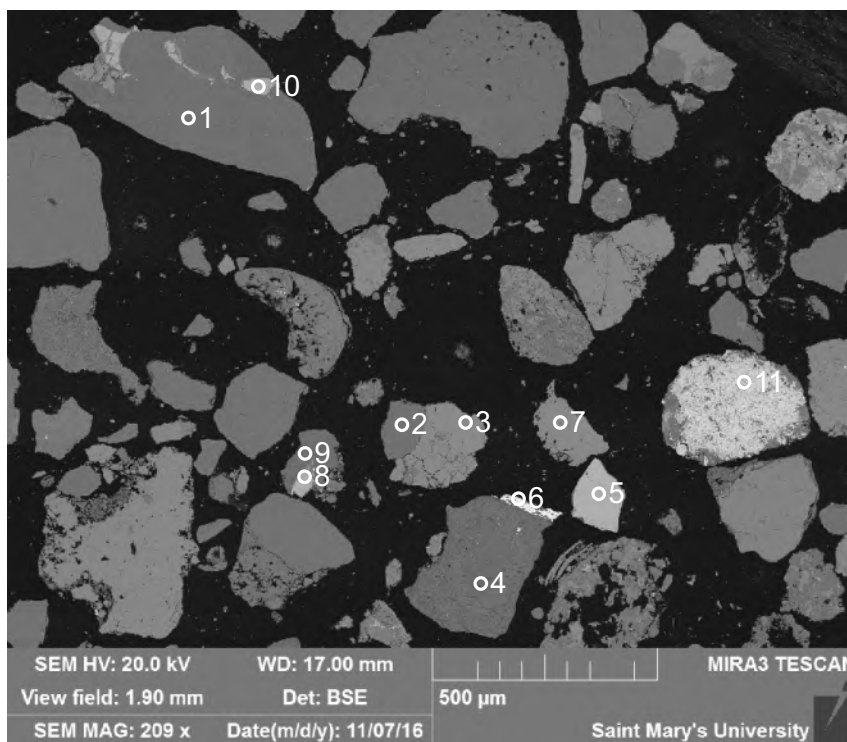

- 1: "Olivine"
- 2: Quartz
- 3: Calcite
- 4: "Olivine"
- 5: Spinel
- 6: Fe-oxide/hydroxide +
- 7: Calcite
- 8: Garnet (Uvarovite)
- 9: "Olivine"
- 10: Garnet (Uvarovite)
- 11: Fe-oxide/hydroxide +

Figure A2.10: Sample S9 Site 9 (SEM). This site contains: Detrital (antigorite) altered olivine (1, 4) that contains patches or veins of uvarovite (8,10), Fe-oxide/hydroxide (6, 11), spinel (5), and calcite (7). Lithic clasts: Quartz + Calcite (2,3, cherty limestone); calcite (7, limestone); "Olivine" + garnet (uvarovite), "Olivine" + Fe-oxide/hydroxides (1,10; 4,6, hydrothermally altered ophiolite).

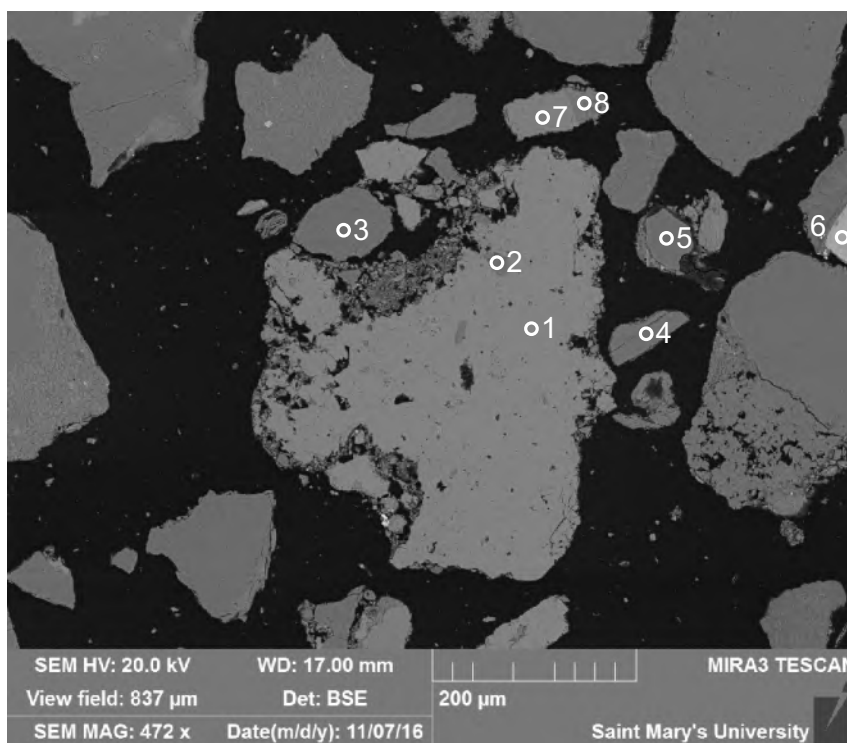

- 1: Calcite
- 2: Quartz
- 3: Quartz
- 4: Albite
- 5: Quartz
- 6: Garnet (Uvarovite)
- 7: K-Feldspar
- 8: Muscovite

Figure A2.11: Sample S9 Site 10 (SEM). This site contains: Detrital calcite (1), quartz (2), albite (4), K-Feldspar (7), muscovite (8), and garnet (uvarovite). Lithic clasts: K-feldspar + muscovite (7-8, igneous or metamorphic); Calcite + Quartz (1-2, cherty limestone); Garnet (uvarovite) (6, hydrothermally altered ophiolite).



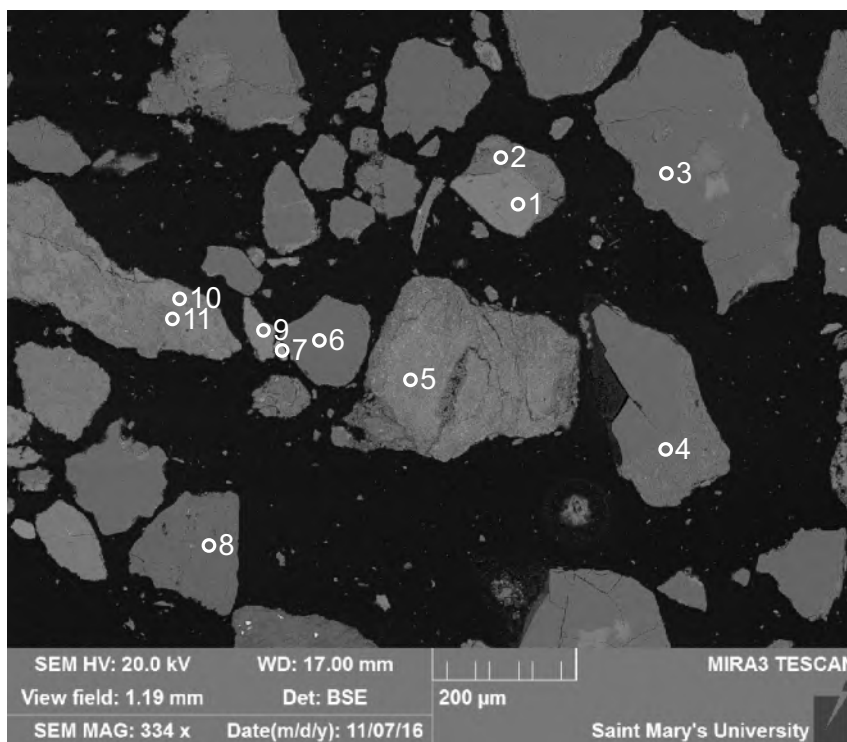

- 1: K-Feldspar
- 2: Quartz +
- 3: Quartz
- 4: Muscovite
- 5: Mix
- 6: Quartz
- 7: Garnet (alm)
- 8: "Olivine"
- 9: Calcite
- 10: Calcite+
- 11: Clay

Figure A2.12: Sample S9 Site 11 (SEM). This site contains: Detrital K-Feldspar (1), quartz (2, 3, 6), and calcite (10). Lithic clasts: K-feldspar + Quartz (1-2, igneous or metamorphic); Quartz + Garnet (6-7, ?metamorphic); Calcite (10-11, limestone).

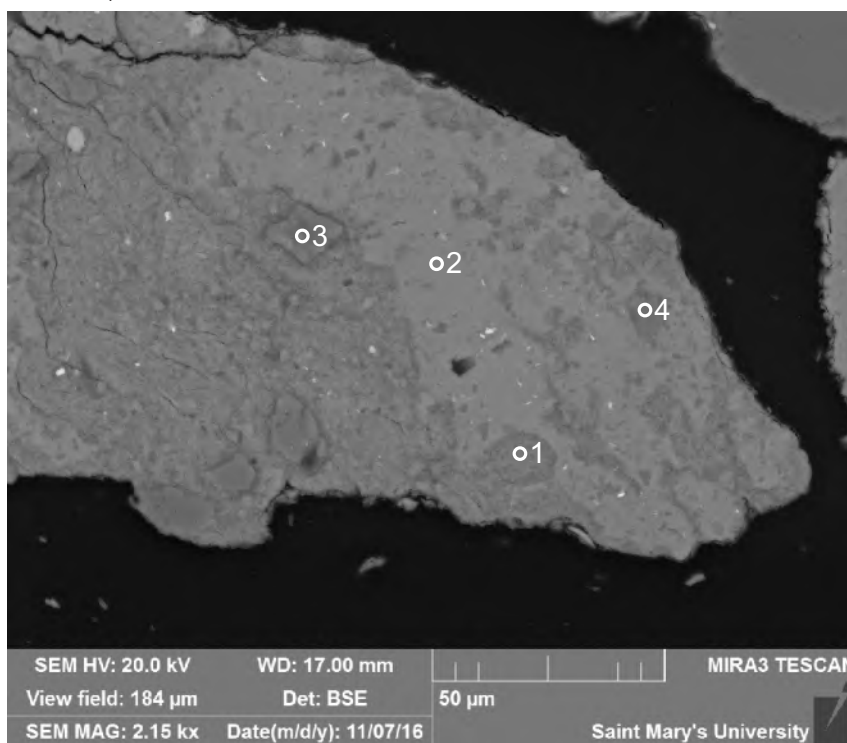

- 1: Clay
- 2: Calcite
- 3: Quartz+
- 4: Albite

Figure A2.13: Sample S9 Site 12 (SEM). This site contains: Detrital calcite (2), albite (4), quartz (3) and possible clay minerals (1). Lithic clast Calcite + Albite + Quartz (2-4, calcareous siltstone).

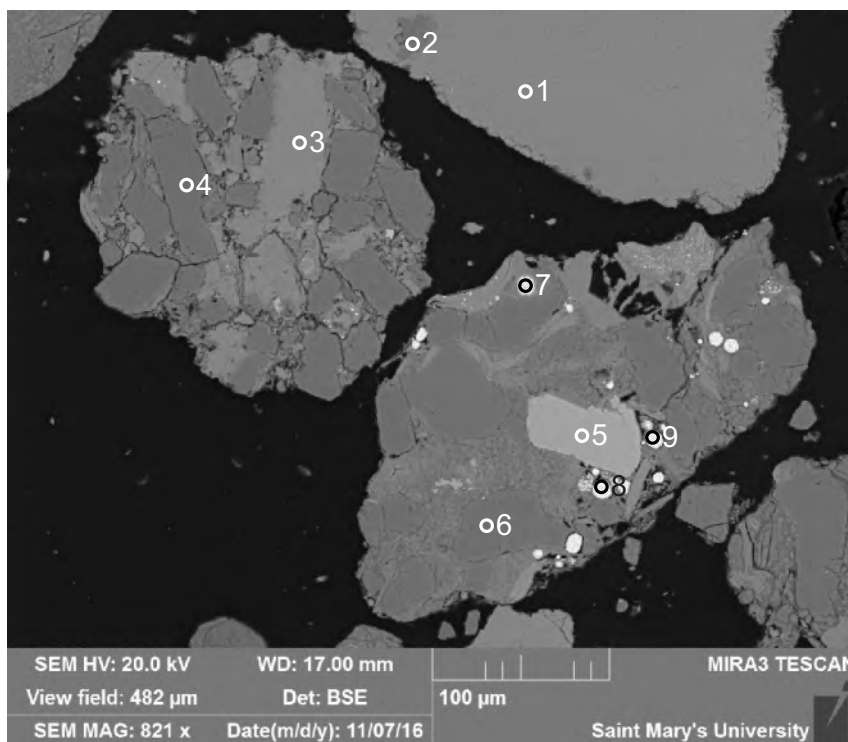

- 1: Calcite
- 2: Quartz +
- 3: Calcite
- 4: Quartz
- 5: Apatite
- 6: Albite
- 7: Pyrite
- 8: Pyrite
- 9: Pyrite

Figure A2.14: Sample S9 Site 13 (SEM). This site contains: Detrital calcite (1,3), quartz (2,4), and albite (6) with apatite (5) inclusion and grains of pyrite (7-9). Lithic clasts: Quartz + Calcite (3-4, calcareous sandstone); Albite + Apatite + Pyrite (5-9, mineralized igneous).

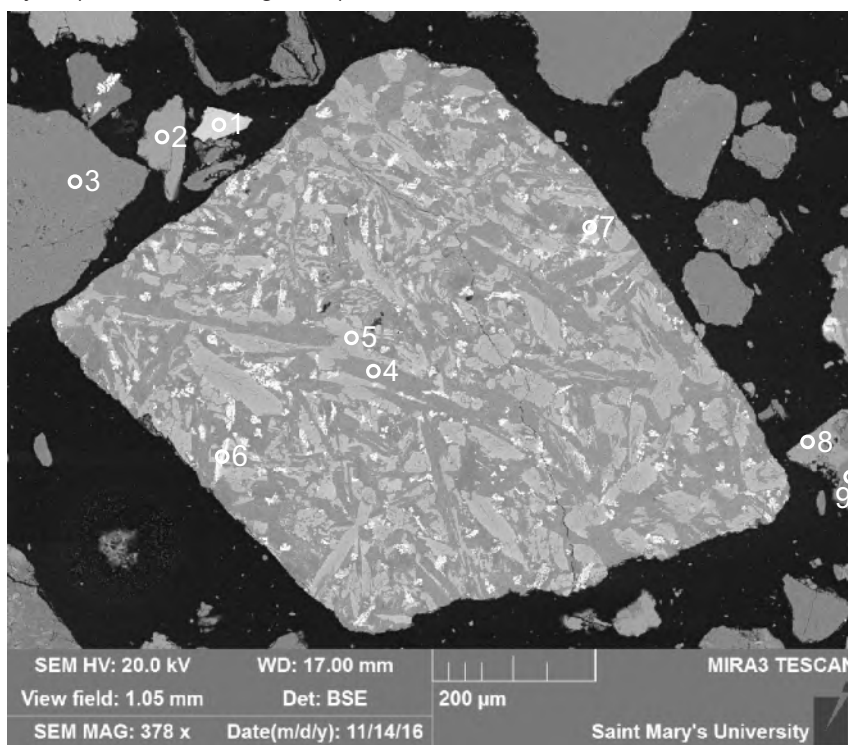

- 1: Spinel
- 2: Calcite
- 3: Quartz
- 4: Plagioclase
- 5: Clinopyroxene
- 6: Fe-oxide/hydroxide +
- 7: Fe-oxide/hydroxide +
- 8: Calcite
- 9: Quartz

Figure A2.15: Sample S9 Site 14 (SEM). This site contains: Detrital spinel (1), calcite (2), quartz (3), plagioclase (4), and grains of Fe-oxide/hydroxide (6, 7). Lithic clast: Plagioclase + Clinopyroxene + Fe-oxide/hydroxide (5-7, basalt); Calcite + Quartz (8-9, cherty limestone or calcareous sandstone).

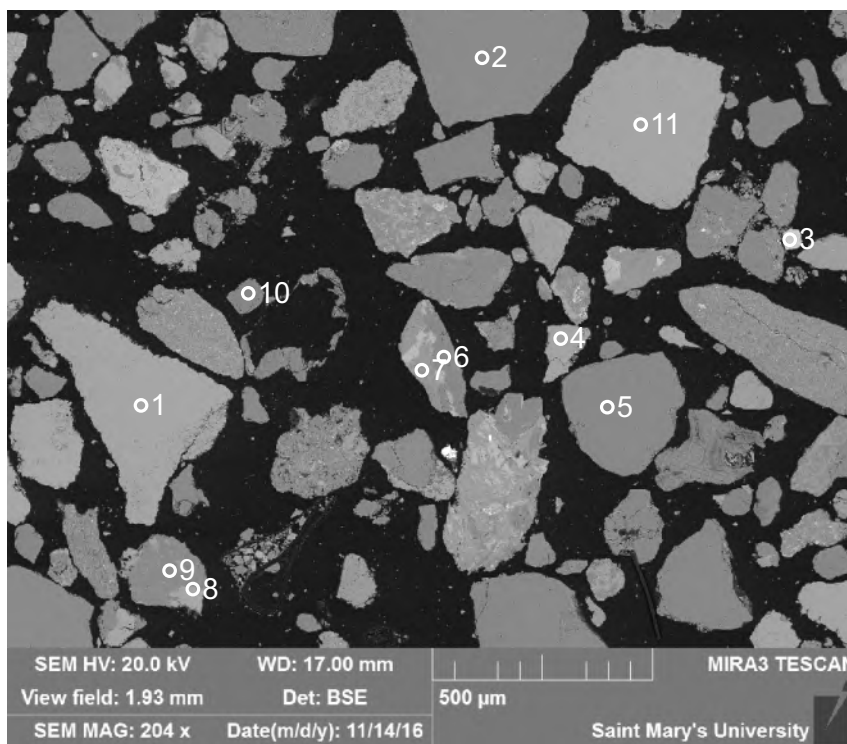

- 1: Calcite
- 2: Quartz +
- 3: Garnet
- 4: Calcite
- 5: Quartz
- 6: Quartz
- 7: Clay
- 8: Calcite
- 9: Quartz
- 10: Dolomite
- 11: Calcite

Figure A2.16: Sample S9 Site 15 (SEM). This site contains: Detrital quartz (2,5-6,9), calcite (1,4,8,11), garnet (3), dolomite (10), and clay minerals (7). Lithic clast: Calcite + Quartz (8-9, cherty limestone or calcareous sandstone); Calcite (1,11, limestone).

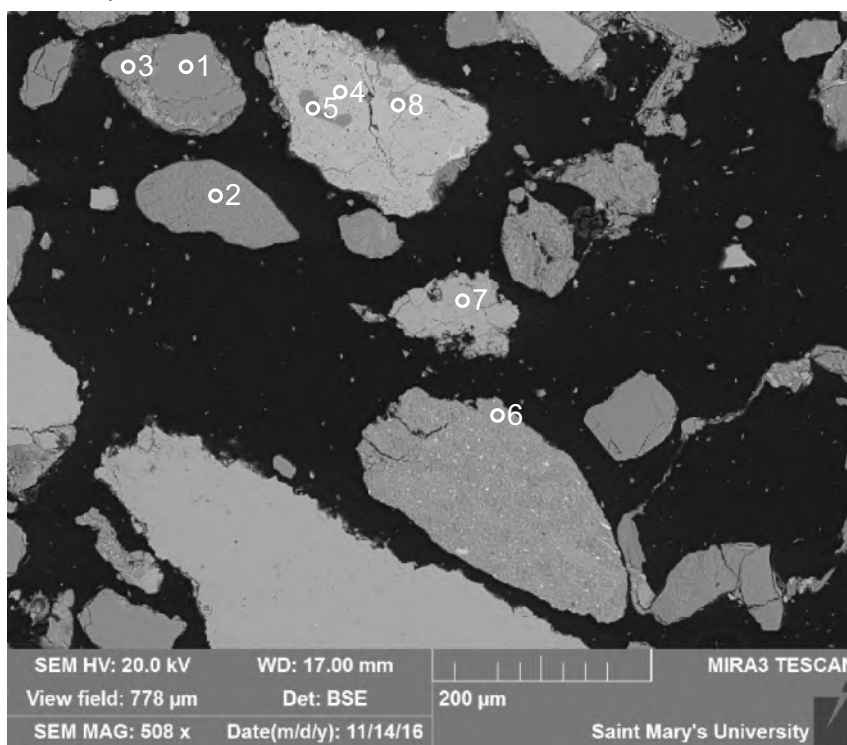

- 1: Albite
- 2: Orthopyroxene
- 3: Quartz
- 4: Epidote
- 5: Quartz
- 6: Quartz+
- 7: Calcite
- 8: Chlorite +

Figure A2.17: Sample S9 Site 16 (SEM). This site contains: Detrital orthopyroxene (2), albite (1), quartz (3,5-6), epidote (4), and chlorite (8). Lithic clasts: Albite + Quartz (1,3, igneous or metamorphic); Epidote + Quartz + Chlorite (4,5,8, hydrothermal); Calcite (7, limestone).



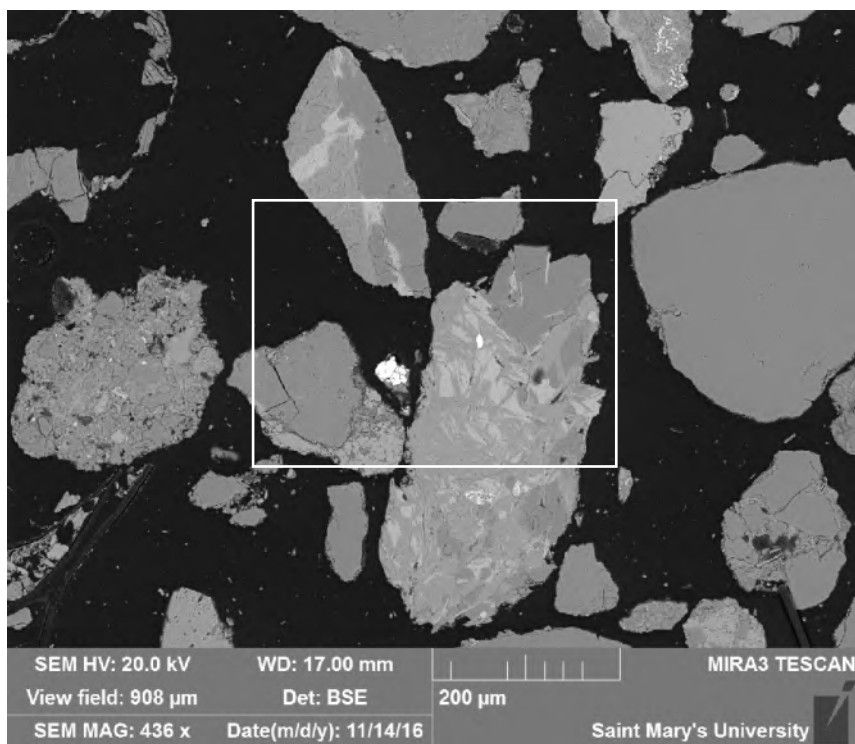

Figure A2.18: Sample S9 (SEM).

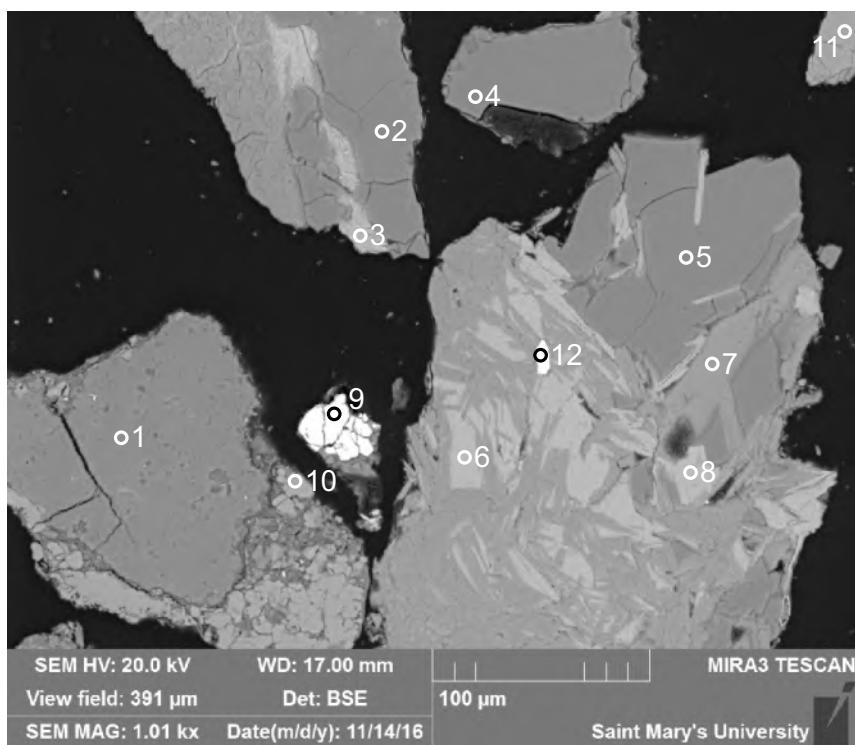

- 1: Quartz +
- 2: Quartz
- 3: Chlorite
- 4: Quartz
- 5: Quartz
- 6: Chlorite
- 7: Muscovite
- 8: Chlorite
- 9: Magnetite +
- 10: Calcite
- 11: Calcite
- 12: Zircon

Figure A2.19: Sample S9 Site 17 (SEM). This site contains: Detrital quartz (1,2,4,5), muscovite (7), chlorite (3,6, 8), zircon (12), and calcite (10,11). Lithic clasts: Quartz + Calcite (1,10, cherty limestone or calcareous sandstone); Quartz + Chlorite (2,3, metamorphic); Quartz + Muscovite + Chlorite + Zircon (5-8,12, metamorphic).



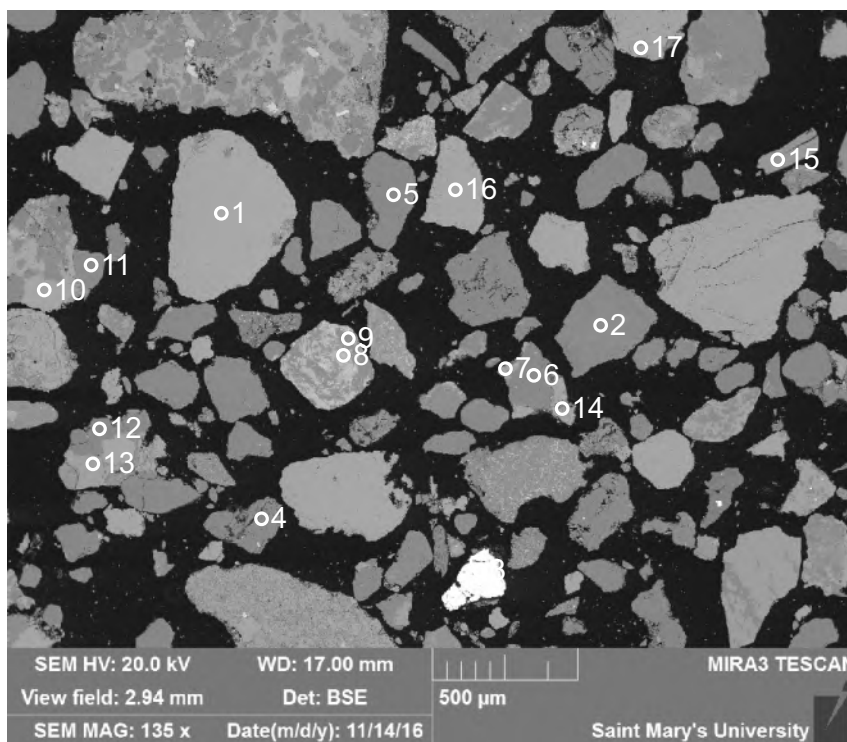

- 1: Calcite
- 2: "Olivine"
- 3: Fe-oxide/hydroxide
- 4: Albite
- 5: Quartz
- 6: Quartz
- 7: Calcite+
- 8: Chlorite + Albite
- 9: Albite +
- 10: Calcite
- 11: Quartz
- 12: Quartz
- 13: K-Feldspar
- 14: Calcite
- 15: K-Feldspar +
- 16: Calcite
- 17: Calcite

Figure A2.20: Sample S9 Site 18 (SEM). This site contains: Detrital "olivine" (2), calcite (1,7,10), quartz (11,12), K-Feldspar (13,15), chlorite (8) and albite (8,9). Lithic clasts: Quartz + Calcite (6,7,14,10-11), cherty limestone or calcareous sandstone; Albite + Chlorite (8,9, metamorphic); K-feldspar + Quartz (12-13, igneous); Calcite (1, limestone).

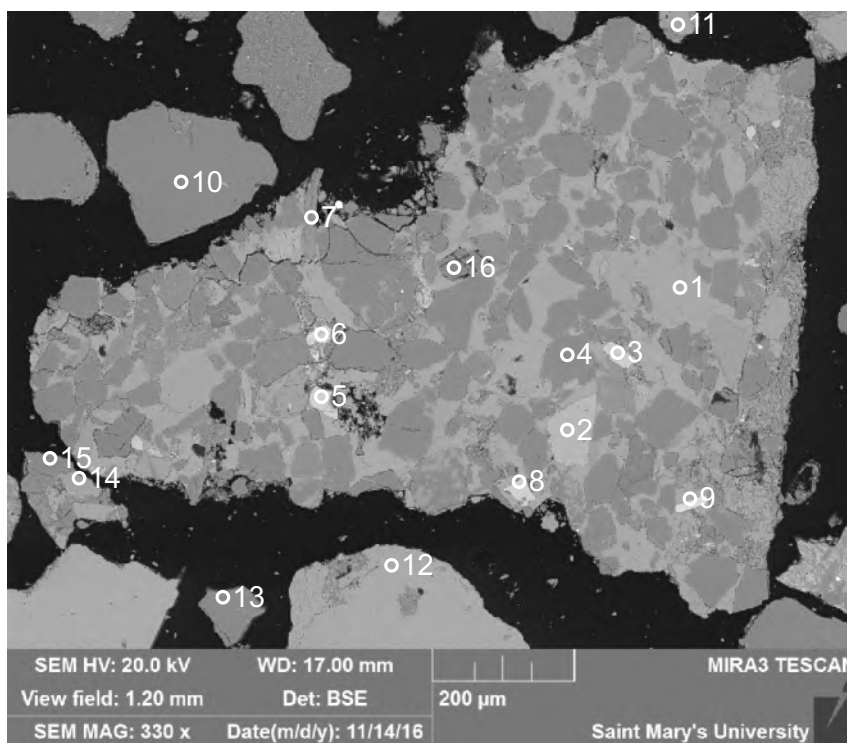

- 1: Calcite
- 2: Epidote
- 3: Spinel
- 4: Albite
- 5: Garnet
- 6: Titanite +
- 7: Muscovite
- 8: Garnet
- 9:  $\text{TiO}_2$
- 10: Quartz
- 11: Calcite
- 12: Calcite
- 13: Quartz
- 14: K-Feldspar
- 15: Albite
- 16: Dolomite

Figure A2.21: Sample S9 Site 19 (SEM). This site contains: Detrital calcite (1), dolomite (16), albite (4,15) garnet (5, 8), epidote (2), titanite (6),  $\text{TiO}_2$  (9), muscovite (7), spinel (3), quartz (10,13), and K-feldspar (14). Lithic clasts: Albite + K-feldspar (14-15, igneous); Calcite (11-12, limestone); Calcite + Epidote + Spinel + Albite + Garnet + Titanite + Muscovite + Titania + Dolomite (1-9,16, calcareous sandstone).

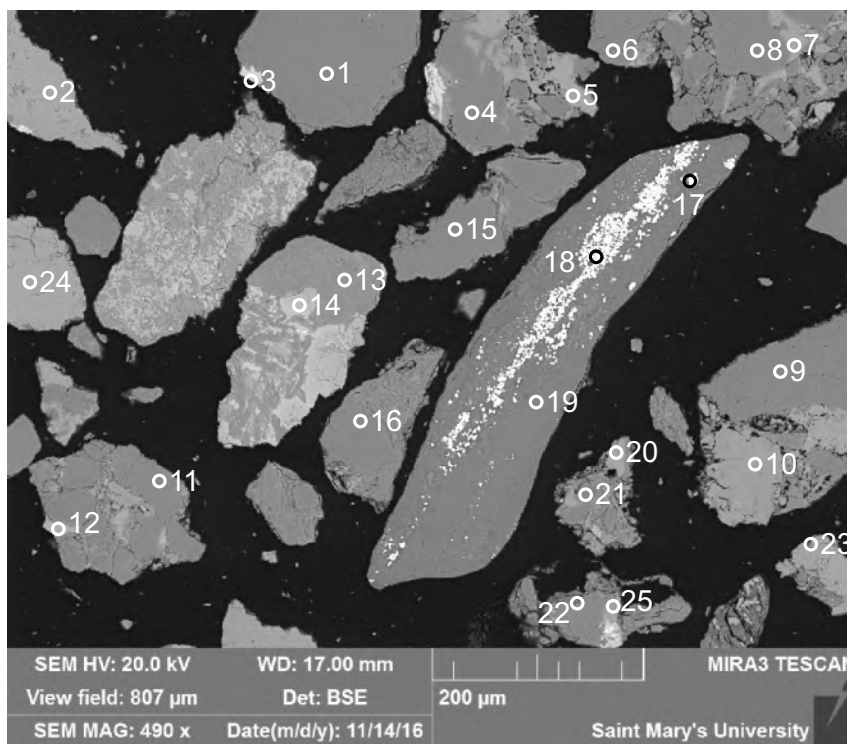

- 1: Quartz
- 2: Calcite
- 3:  $\text{TiO}_2$
- 4: Quartz
- 5: Calcite
- 6: Albite
- 7: Calcite+
- 8: Quartz
- 9: Quartz
- 10: K-Feldspar
- 11: Quartz
- 12: Chlorite
- 13: K-Feldspar
- 14: Amphibole (Actinolite)
- 15: Quartz
- 16: Quartz
- 17: Fe-oxide/hydroxide +
- 18: Fe-oxide/hydroxide +
- 19: Orthopyroxene
- 20: Calcite
- 21: Quartz
- 22: Albite
- 23: Calcite
- 24: Calcite
- 25: Chlorite

Figure A2.22: Sample S9 Site 20 (SEM). This site contains: Detrital quartz (1, 4, 8, 9, 11, 15, 16, 21), calcite (2, 5, 7, 20, 23, 24), K-Feldspar (10, 13), albite (6, 22),  $\text{TiO}_2$  (3), and Fe-Oxide/hydroxide (17,18), along with chlorite (12, 25), amphibole (14), and orthopyroxene (19). Lithic clasts: Quartz + K-feldspar (9-10, igneous); Orthopyroxene + Fe-oxide/hydroxide (17-19, Peridotite); K-feldspar + Amphibole (13-14, igneous); Calcite + Quartz (4-5,7-8, cherty limestone); Calcite + Quartz (20,21, cherty limestone); Albite + Chlorite (22,25, metamorphic).

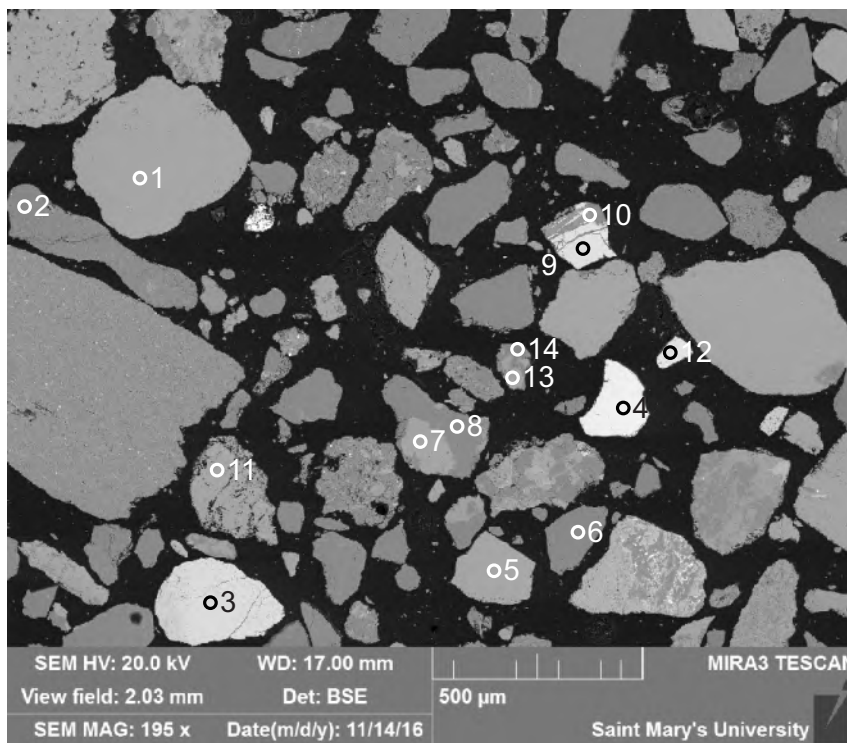

- 1: Calcite
- 2: Quartz
- 3: Garnet (Andradite)
- 4: Chromite
- 5: Calcite
- 6: Quartz
- 7: Calcite
- 8: Quartz
- 9: Spinel
- 10: Chlorite
- 11: Calcite
- 12: Chromite
- 13: Calcite
- 14: Quartz

Figure A2.23: Sample S9 Site 21 (SEM). This site contains: Detrital garnet (3), chromite (4, 12), spinel (9), calcite (1,5,7,13), quartz (2,6,8,14), and chlorite (10). Lithic clasts: Calcite (1, limestone); Calcite + Quartz (5-6,13-14, cherty limestone).

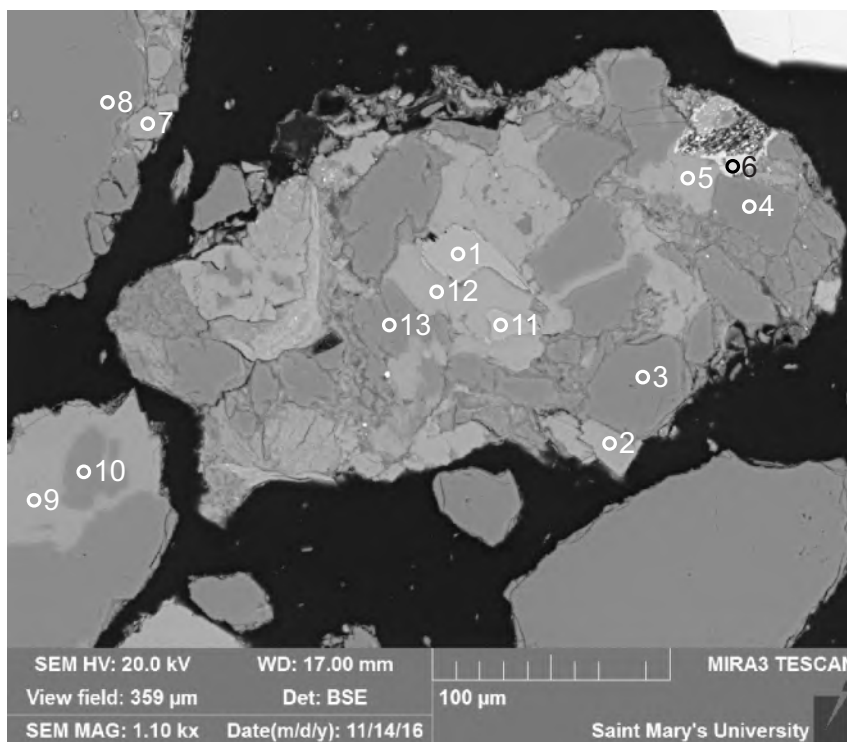

- 1: Chloritoid
- 2: K-Feldspar + Calcite
- 3: Quartz
- 4: Quartz
- 5: Calcite
- 6: TiO<sub>2</sub>
- 7: K-Feldspar
- 8: Quartz
- 9: K-Feldspar
- 10: Quartz
- 11: Chloritoid
- 12: Calcite
- 13: Albite

Figure A2.24: Sample S9 Site 22 (SEM). This site contains: Detrital quartz (3, 4, 8, 10), calcite (5, 12), K-Feldspar (2,7,9), albite (13), chloritoid (1,11), and grains of TiO<sub>2</sub> (6). Lithic clasts: Quartz + K-feldspar (7-8, igneous or metamorphic); Quartz + K-feldspar (9-10, igneous); Quartz + K-feldspar + Albite + Calcite + Chloritoid (1-6,11-13, sandstone).

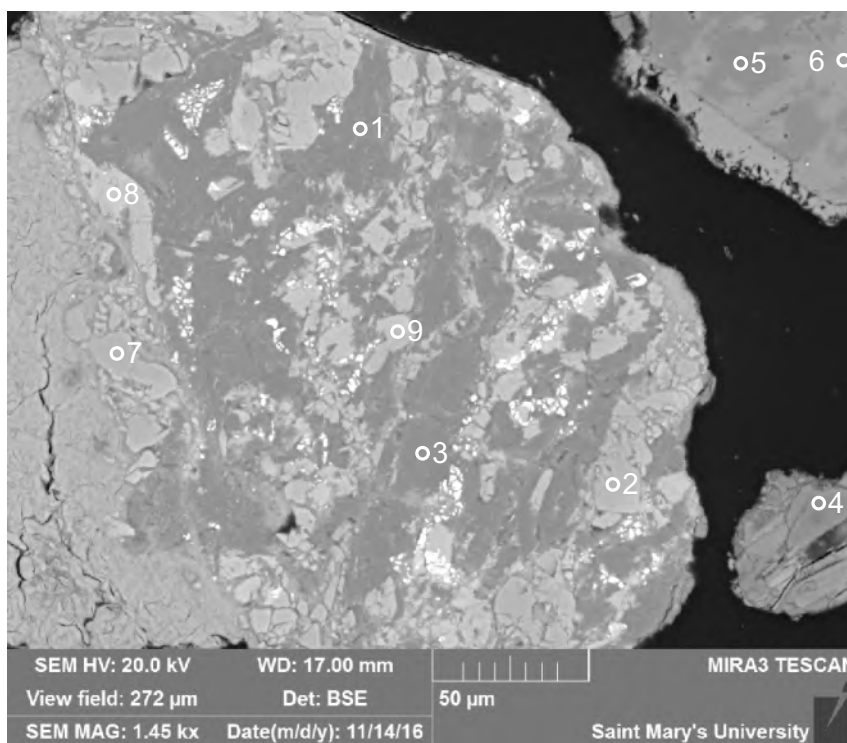

- 1: Albite +
- 2: Clinopyroxene
- 3: Albite
- 4: Albite
- 5: Albite
- 6: K-Feldspar
- 7: Clinopyroxene
- 8: Titanite
- 9: Clinopyroxene

Figure A2.25: Sample S9 Site 23 (SEM). This site contains: Detrital albite (1, 3, 4, 5), K-Feldspar (6), clinopyroxene (2,7,9), and titanite (8). Lithic clasts: Albite + K-feldspar (5-6, igneous); Clinopyroxene + Albite + Titanite (1-3,7-9, Ab-Cpx schist with minor titanite), metaophiolite.



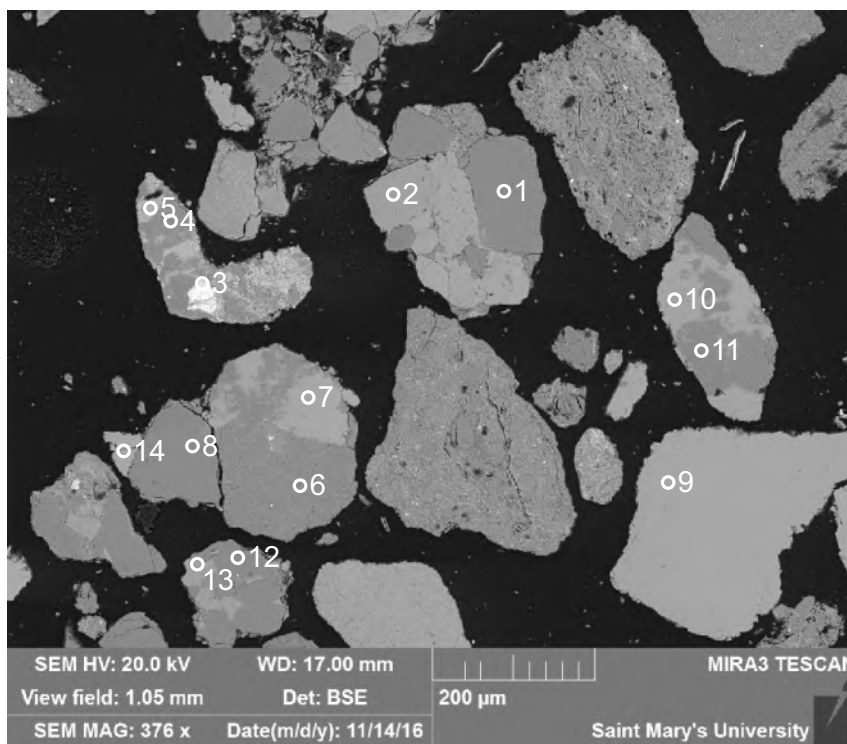

- 1: Quartz
- 2: K-Feldspar
- 3: Mix
- 4: Albite
- 5: Actinolite
- 6: Quartz+
- 7: Calcite
- 8: Quartz
- 9: Calcite
- 10: Calcite
- 11: Quartz +
- 12: Quartz
- 13: K-Feldspar
- 14: Calcite

Figure A2.26: Sample S9 Site 24 (SEM). This site contains: Detrital quartz (1, 6, 8, 11, 12), calcite (7, 9, 10, 14), albite (4) and K-Feldspar (2,13), and detrital actinolite (5). Lithic clasts: Quartz + Calcite (10-11,14,8,6-7, cherty limestone); Quartz + K-feldspar (1-2,12-13, igneous); Albite + Actinolite (4-5, igneous or metamorphic).

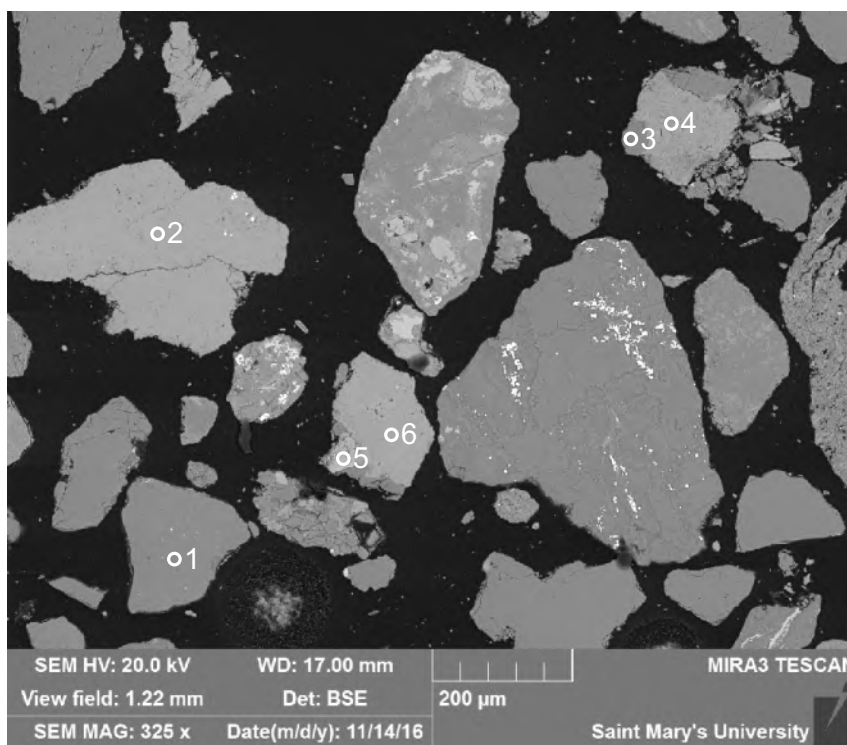

- 1: Quartz
- 2: Calcite
- 3: Albite
- 4: Calcite
- 5: Spinel
- 6: Calcite

Figure A2.27: Sample S9 Site 25 (SEM). This site contains: Detrital quartz (1), calcite (2,4,6), albite (3), and spinel (5). Lithic clasts: Calcite (2, limestone); Calcite + Albite (3-4, metamorphic or sandy limestone); Calcite + Spinel (5-6, metaophiolite).



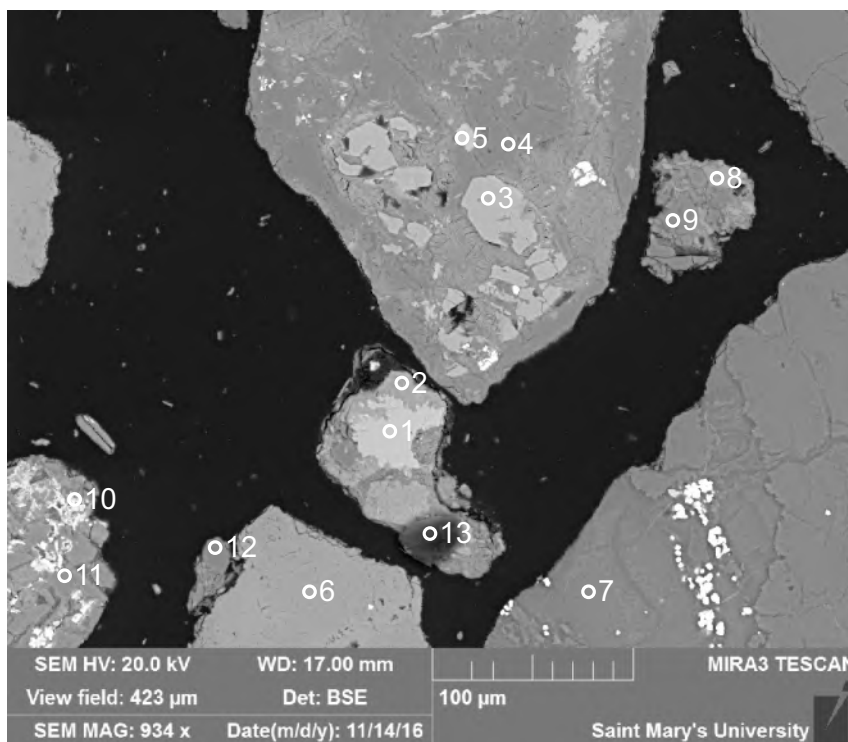

- 1: Titanite
- 2: Chlorite
- 3: Clinopyroxene
- 4: Glaucophane
- 5: Titanite
- 6: Calcite
- 7: Orthopyroxene
- 8: Calcite +
- 9: Albite +
- 10: Ilmenite +
- 11: Feldspar
- 12: Albite
- 13: Mix

Figure A2.28: Sample S9 Site 26 (SEM). This site contains: Detrital titanite (1,5), albite (9,11,12), clinopyroxene (3), ilmenite (10), calcite (6), ?glaucophane (4), and chlorite (2). Lithic clasts: Calcite + Albite (8-9, metamorphic or sandy limestone); Albite + Ilmenite (10-11, igneous); Clinopyroxene + Titanite + Glaucophane (3-5, glaucophane crystal with inclusions?, metamorphic); Orthopyroxene + Fe-oxide/hydroxides (7), ophiolite.

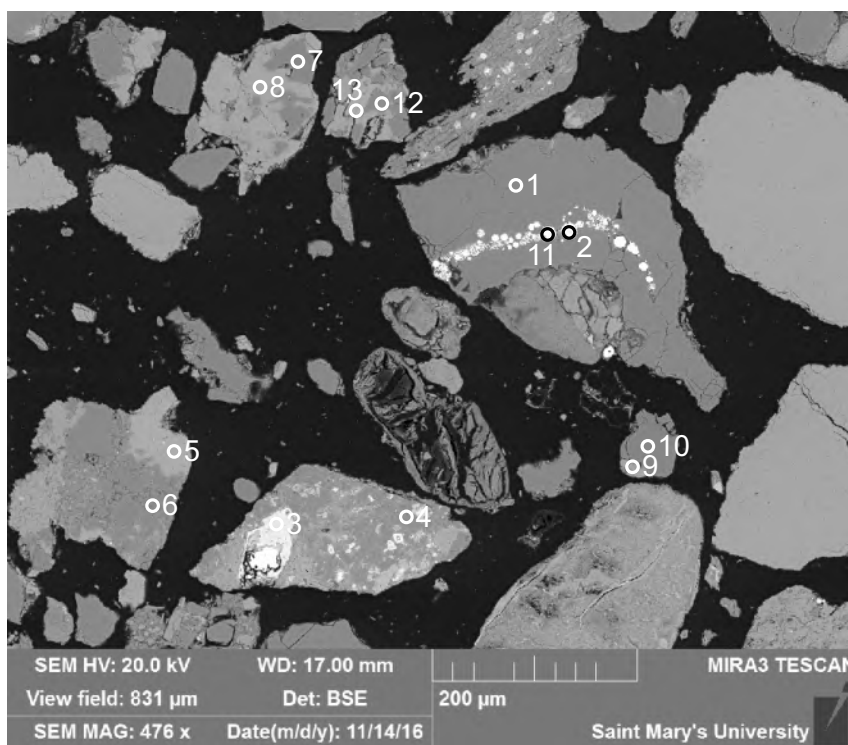

- 1: Quartz
- 2: Pyrite
- 3: Fe-Oxide/hydroxide +
- 4: Albite +
- 5: Calcite
- 6: Quartz
- 7: Dolomite
- 8: Calcite
- 9: Calcite
- 10: Dolomite
- 11: Pyrite
- 12: Albite
- 13: Chlorite

Figure A2.29: Sample S9 Site 27 (SEM). This site contains: Detrital quartz (1, 6), calcite (5, 8, 9), albite (4,12), chlorite (13), and dolomite (7,10). Lithic clasts: Calcite + Dolomite (7-8, 9-10, limestone); Albite + Chlorite (12-13, metamorphic); Calcite + Quartz (5-6, cherty limestone); Quartz + Pyrite (1-2,11, quartz crystals with pyrite patches/inclusions, hydrothermal); Albite + Fe-oxide/hydroxide (3-4, albite grain with Feohy patches, hydrothermal).

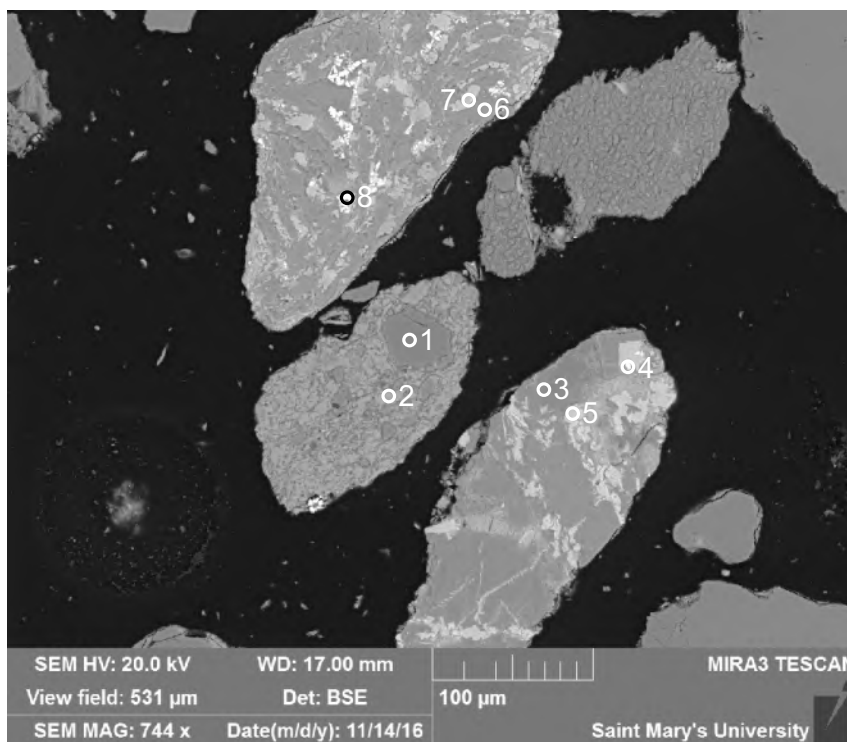

- 1: Dolomite
- 2: Calcite
- 3: Quartz+
- 4: Titanite
- 5: Mix
- 6: Plagioclase +
- 7: Clinopyroxene
- 8: Fe-oxide/hydroxide +

Figure A2.30: Sample S9 Site 28 (SEM). This site contains: Detrital quartz (3), calcite (2) and albite (6) with detrital garnet (8), clinopyroxene (7) and grains of titanite (4). Lithic clasts: Albite + Clinopyroxene + Fe-oxide/hydroxide (6-8, deformed igneous); Dolomite (1-2) (limestone); Quartz-Titanite rock (3-5, metamorphic).

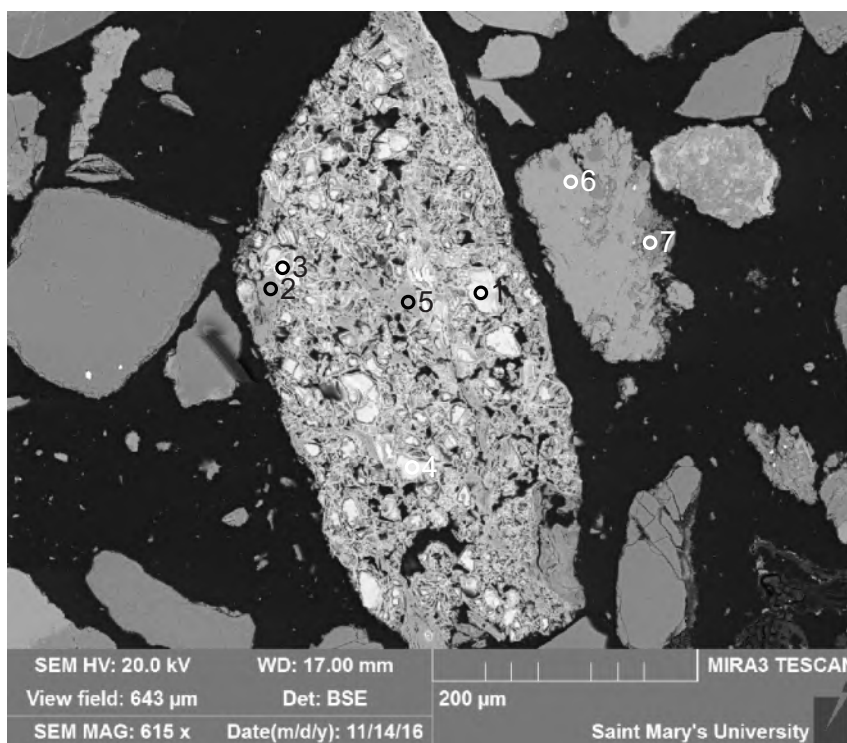

- 1: Fe-Oxide/hydroxide +
- 2: Chlorite
- 3: Pyrite
- 4: Fe-Oxide/hydroxide +
- 5: Chlorite
- 6: Calcite +
- 7: Quartz

Figure A2.31: Sample S9 Site 29 (SEM). This site contains: Detrital chlorite (2, 5), Fe-oxide/hydroxide (1, 4), pyrite (3), calcite (6) and quartz (7). Lithic clasts: Calcite + Quartz (6-7, cherty limestone); Fe-oxide/hydroxide + Chlorite (1-5, pedogenic intraclast).

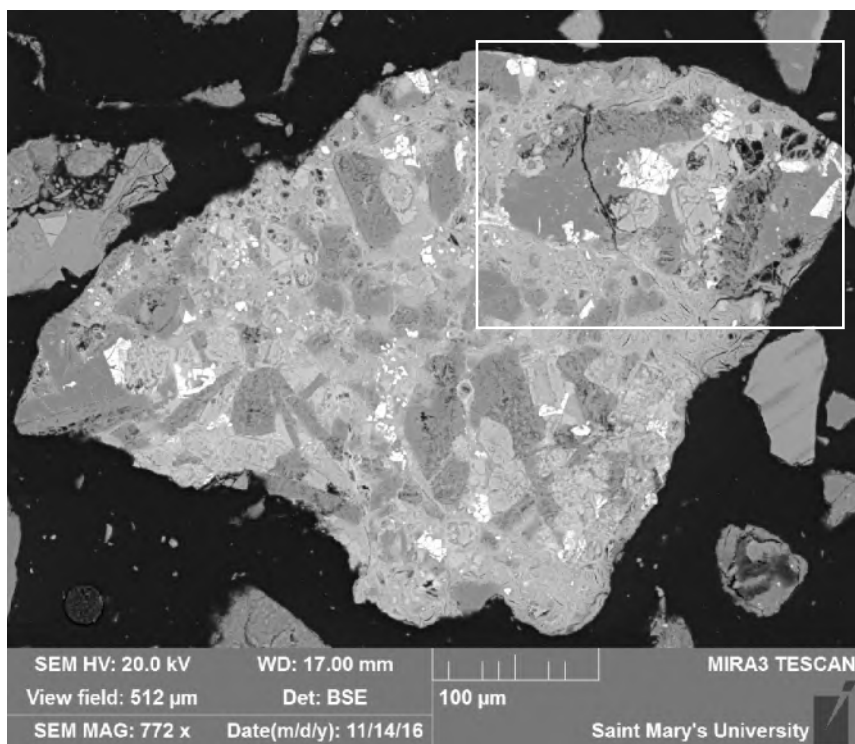

Figure A2.32: Sample S9 (SEM).

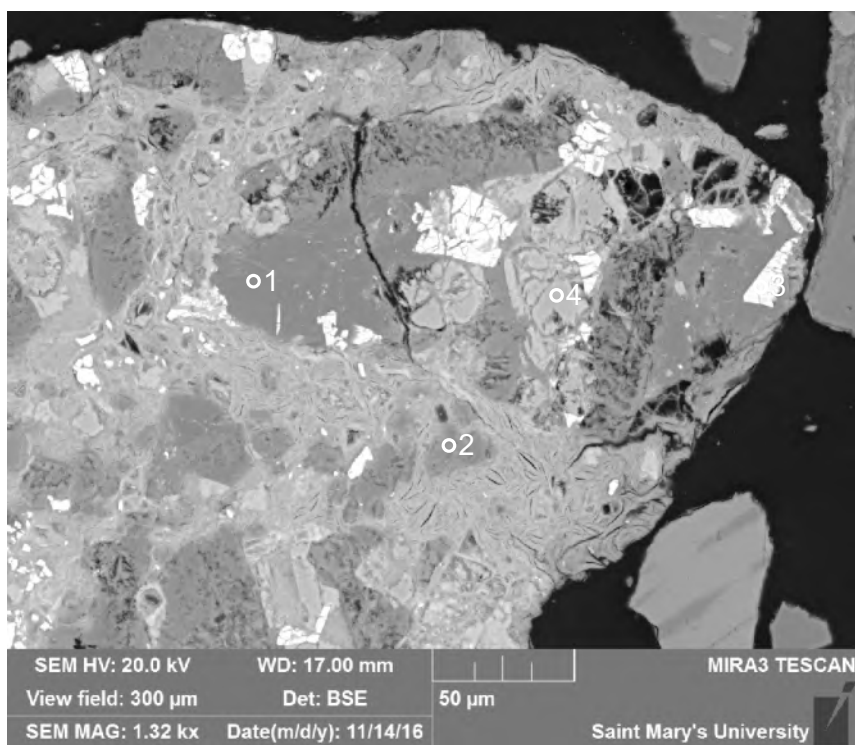

- 1: Quartz
- 2: Albite + Chlorite
- 3: Fe-Oxide/hydroxide +
- 4: Amphibole (Actinolite)

Figure A2.33: Sample S9 Site 30 (SEM). This site contains: Detrital quartz (1) with grains of Fe-oxide/hydroxide (3) and amphibole (4). Lithic clast: Quartz + Albite + Chlorite + Fe-oxide/hydroxide + Amphibole (1-4, ?pedogenic intraclast or calcareous sandstone).



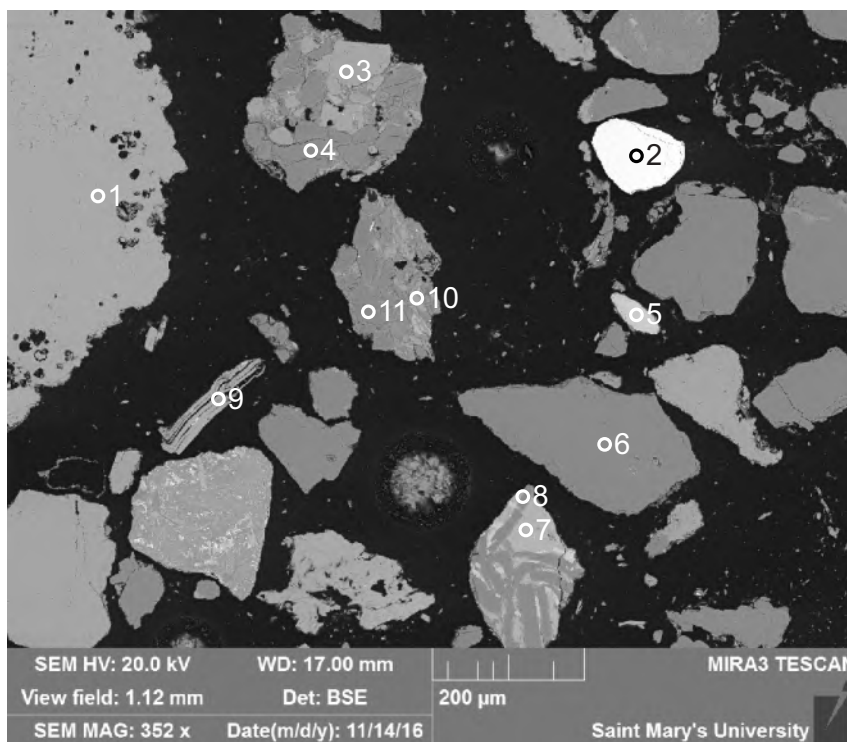

- 1: Calcite
- 2: Chromite
- 3: Calcite
- 4: Albite
- 5: Titanite
- 6: Quartz
- 7: Chlorite
- 8: Albite
- 9: Chlorite
- 10: Calcite
- 11: Quartz

Figure A2.34: Sample S9 Site 31 (SEM). This site contains: Detrital calcite (1, 3, 10), albite (4, 8), chromite (2), quartz (6, 11), and chlorite (7, 9). Lithic clasts: Calcite (1, limestone); Albite + Calcite (3-4, metamorphic); Quartz + Calcite (10-11, cherty limestone); Albite + Chlorite (7-8, metamorphic).

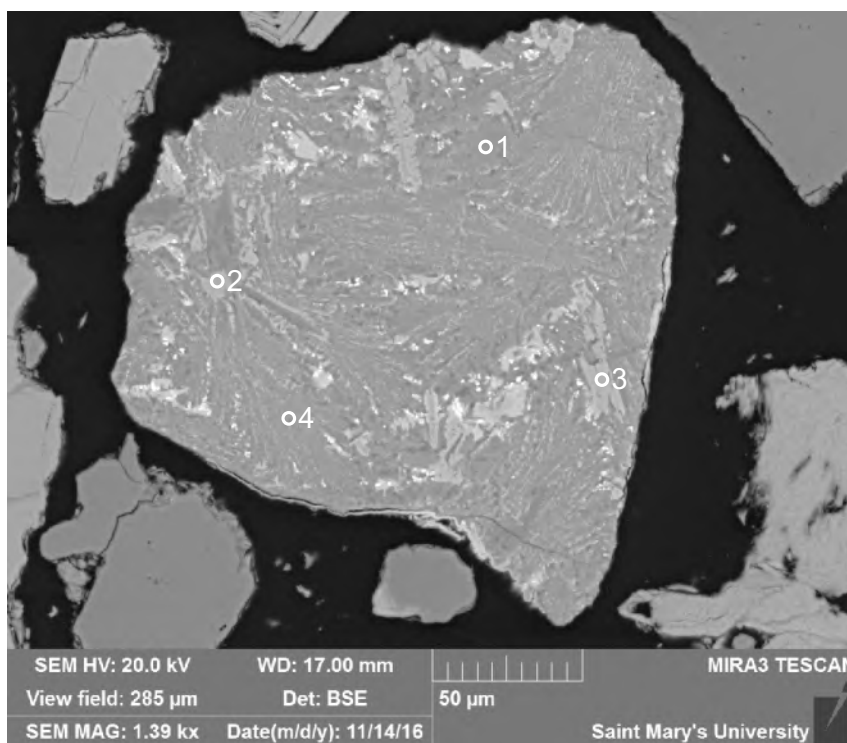

- 1: Oligoclase + Chlorite
- 2: Clinopyroxene
- 3: Clinopyroxene
- 4: Glaucophane

Figure A2.35: Sample S9 Site 32 (SEM). This site contains: Detrital oligoclase, and chlorite (1), clinopyroxene (2,3), and glaucophane (4). Lithic clast: glaucophane, clinopyroxene, oligoclase, and chlorite (1-4, metamorphic).



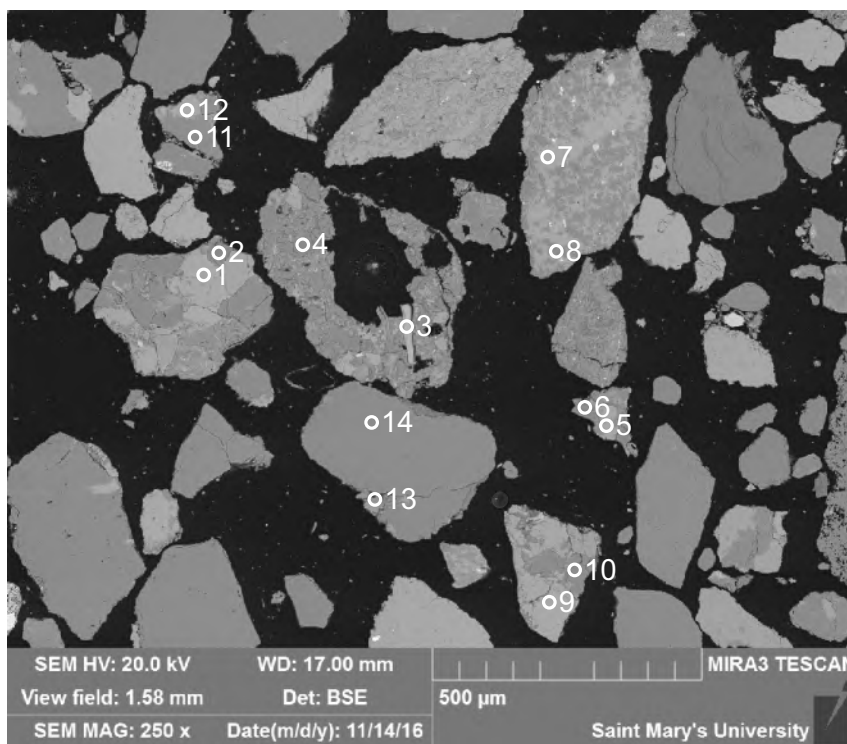

- 1: Calcite
- 2: Dolomite
- 3: Mix
- 4: Quartz
- 5: Calcite
- 6: Quartz
- 7: Calcite
- 8: Quartz+
- 9: Calcite
- 10: Quartz
- 11: Quartz +
- 12: Calcite
- 13: Mix
- 14: Quartz

Figure A2.36: Sample S9 Site 33 (SEM). This site contains: Detrital calcite (1,5,7,9,12), dolomite (2), and quartz (4,6,8,10,11,14). Lithic clasts: Calcite + Dolomite (1-2, limestone); Quartz + Calcite (5-6,7-8,9-10,11-12 cherty limestones).

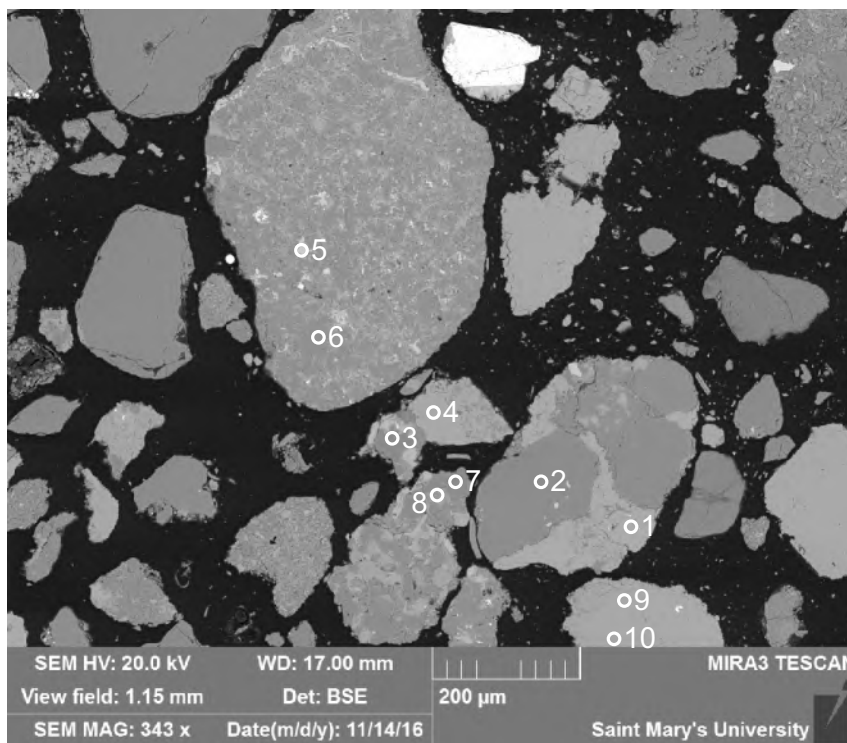

- 1: Calcite
- 2: Quartz
- 3: Quartz
- 4: Calcite
- 5: Titanite
- 6: Albite
- 7: Quartz
- 8: Calcite+
- 9: Calcite + Chlorite +
- 10: Calcite

Figure A2.37: Sample S9 Site 34 (SEM). This site contains: Detrital albite (6), titanite (5), and calcite (1,4,8-10). Lithic clasts: Quartz + Calcite (1-2,3-4,7-8, cherty limestones); Albite + Titanite (5-6, metamorphic).

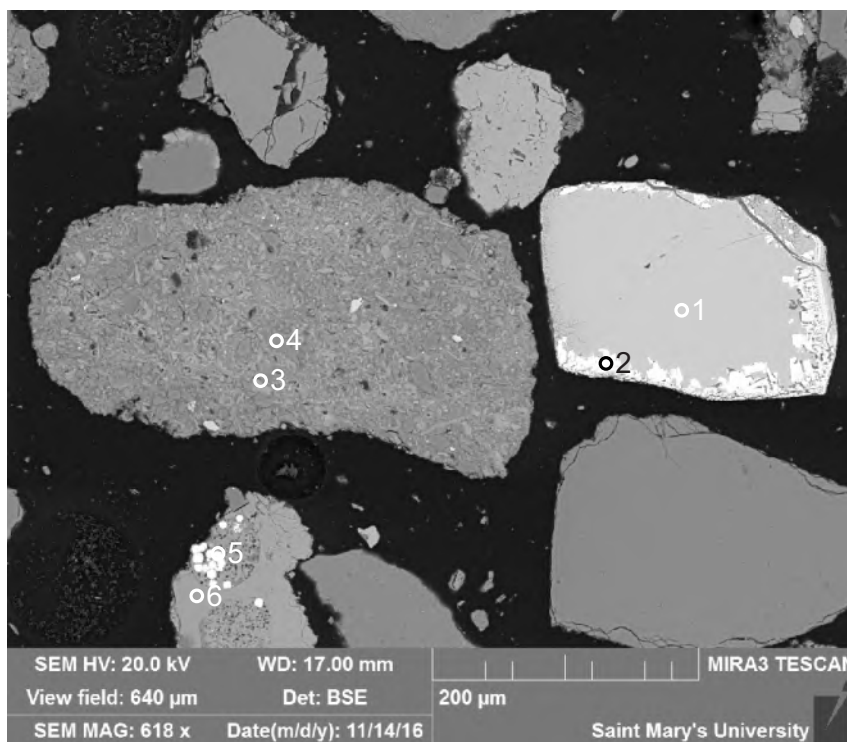

- 1: Spinel
- 2: "Chromite"
- 3: Mix ?
- 4: Quartz +
- 5: Pyrite
- 6: Calcite

Figure A2.38: Sample S9 Site 35 (SEM). This site contains: Detrital spinel (1), altered chromite (2), calcite (6), and pyrite (5). Lithic clasts: Spinel + Chromite (1-2, ophiolite); Calcite + Pyrite (5-6, hydrothermally altered limestone); Calcareous siltstone (3-4).

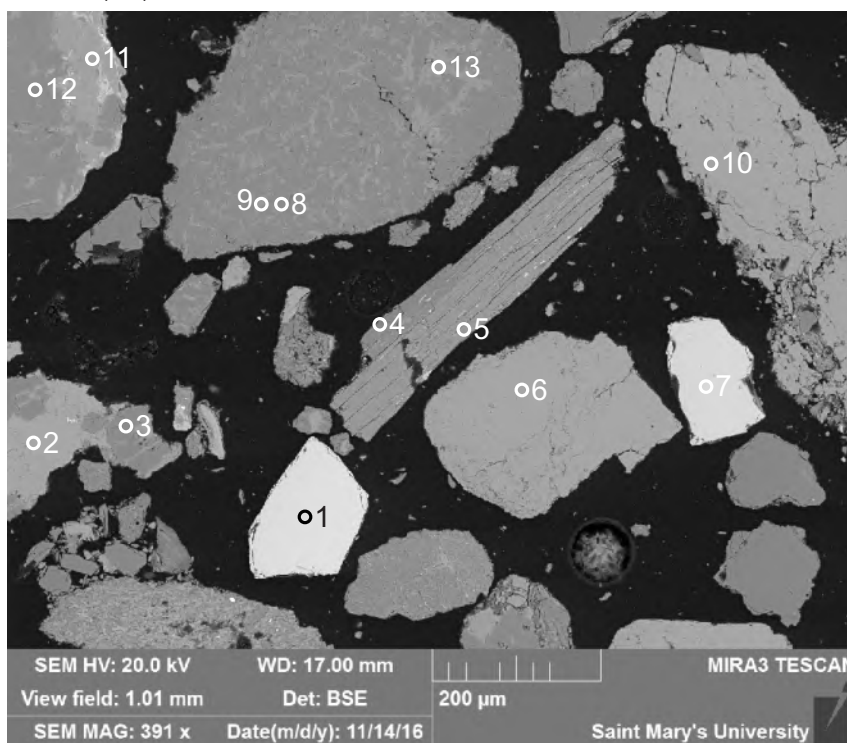

- 1: Chromite
- 2: Calcite
- 3: Quartz+
- 4: "Orthopyroxene"
- 5: Orthopyroxene
- 6: Calcite
- 7: Spinel
- 8: Albite
- 9: Muscovite
- 10: Calcite
- 11: K-Feldspar
- 12: Albite
- 13: Muscovite

Figure A2.39: Sample S9 Site 36 (SEM). This site contains: Detrital chromite (1), orthopyroxene (4-5), quartz (3), albite (8,12), spinel (7), muscovite (9,13), and calcite (2,6,10). It also contains lithic clasts made up of K-feldspar and Albite (11,12, igneous), Albite and Muscovite (8,9,13, igneous or metamorphic), Calcite and Quartz (2,3, cherty limestone), and calcite (10, limestone).

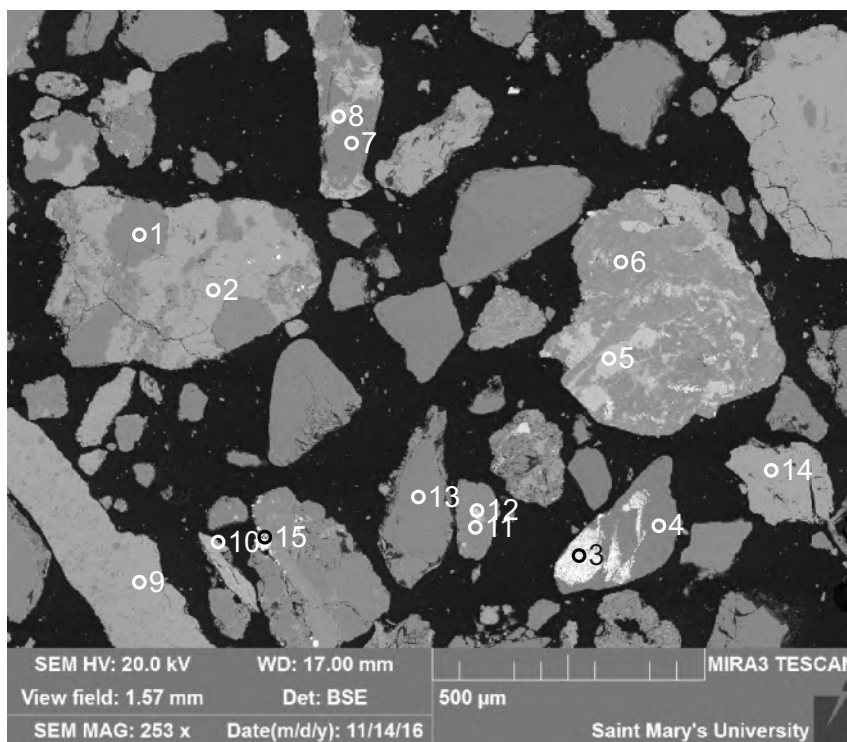

- 1: Quartz
- 2: Calcite
- 3: Chromite +
- 4: "Orthopyroxene"
- 5: Clinopyroxene
- 6: Albite +
- 7: Quartz
- 8: Epidote +
- 9: Calcite+
- 10: Chlorite
- 11: Albite
- 12: Apatite
- 13: Quartz
- 14: Calcite
- 15: Fe-oxide/hydroxide +

Figure A2.40: Sample S9 Site 37 (SEM). This site contains: Detrital chlorite (10), apatite (12), Fe-oxide/hydroxide (15), quartz (1,7,13), orthopyroxene (4), clinopyroxene (5), chromite (3), calcite (2,9,14), albite (6,11), and epidote (8). Lithic clasts: Chromite + Orthopyroxene (3-4, peridotite); Quartz + Calcite (1-2, cherty limestone); Clinopyroxene + Albite (5-6, igneous or metamorphic); Quartz + Epidote (7-8, hydrothermal or metamorphic); Albite + Apatite (11-12, igneous).

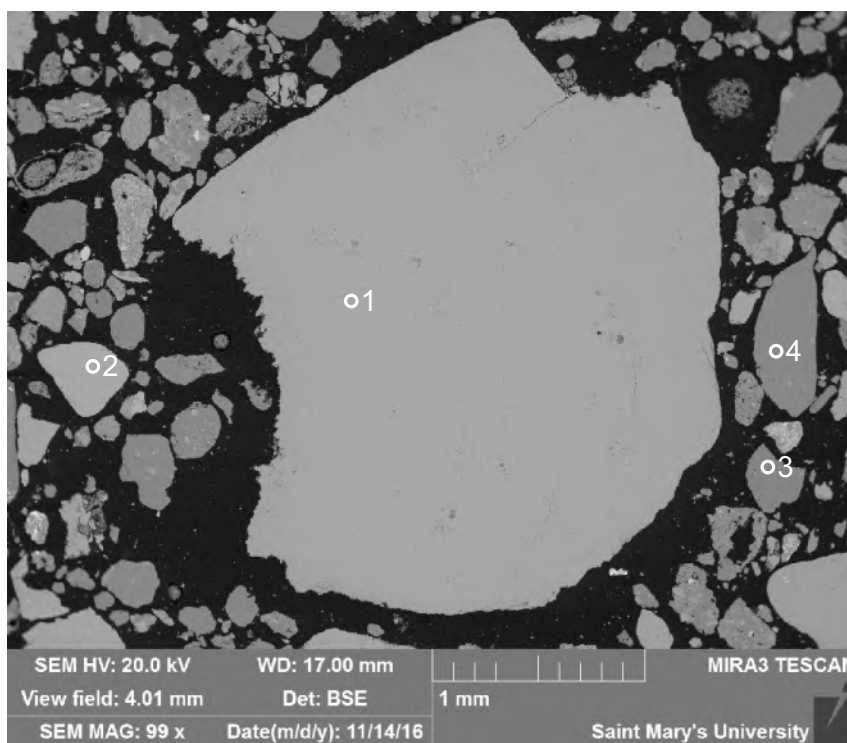

- 1: Calcite
- 2: Calcite
- 3: Quartz + Albite
- 4: Quartz

Figure A2.41: Sample S9 Site 38 (SEM). This site contains: Detrital calcite (1,2), quartz (4), and albite (3). Lithic clast: Calcite (1, limestone).



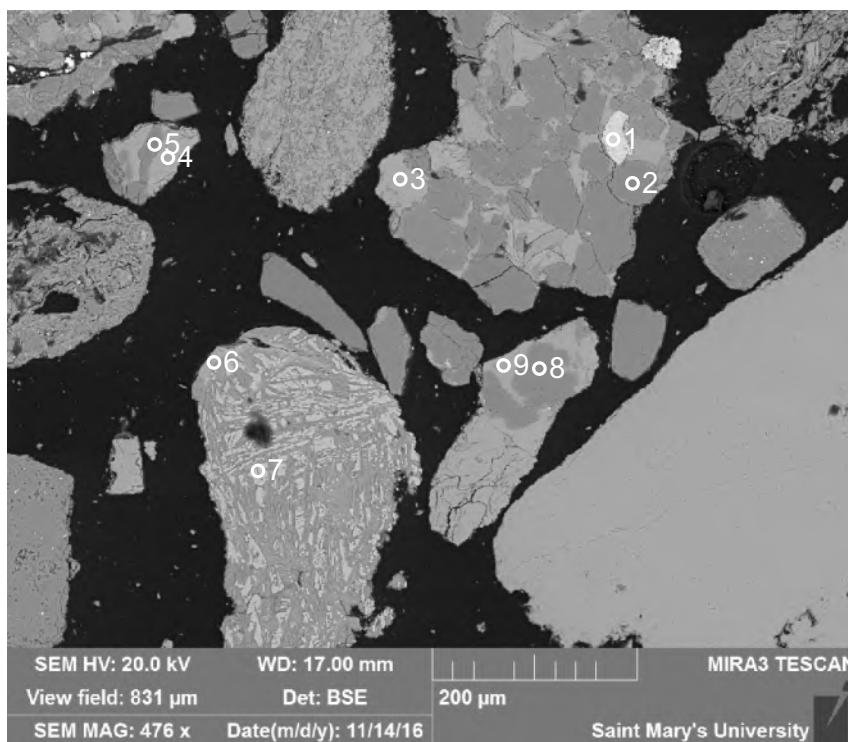

- 1: Titanite +
- 2: Quartz
- 3: Calcite
- 4: Calcite
- 5: Quartz
- 6: Chlorite +
- 7: Clinopyroxene +
- 8: Quartz
- 9: Calcite

Figure A2.42: Sample S9 Site 39 (SEM). This site contains: Detrital quartz (2, 5, 8), calcite (3, 4, 9), titanite (1), chlorite (6) and clinopyroxene (7). Lithic clasts: Quartz + Calcite + Titanite (1-3, calcareous sandstone); Quartz + Calcite (4-5, 8-9, cherty limestones); chlorite + clinopyroxene (6-7, peridotite).

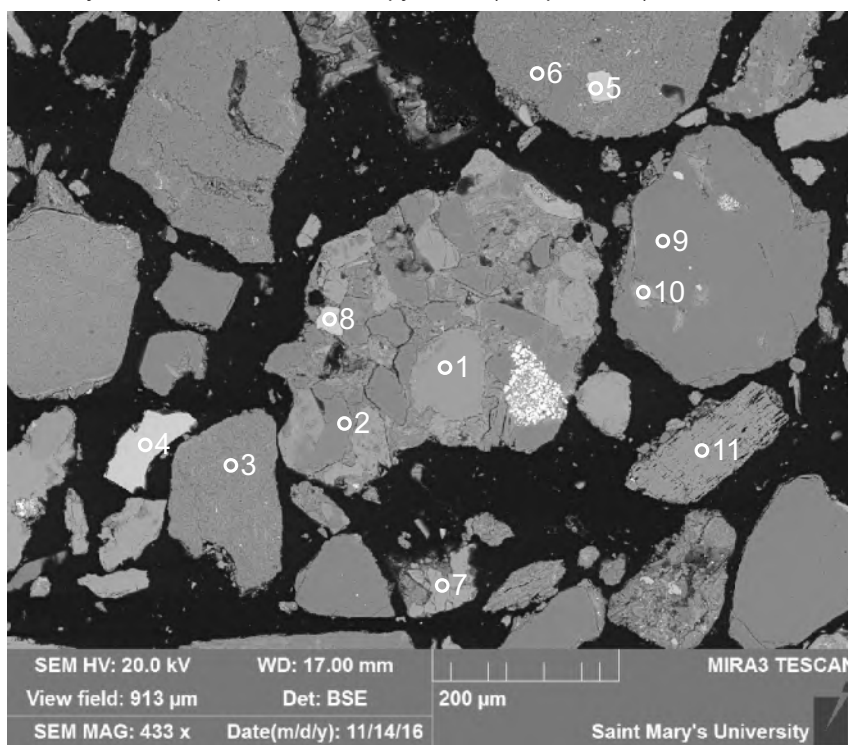

- 1: K-Feldspar
- 2: Albite
- 3: Quartz +
- 4: Garnet (Almandine)
- 5: Spinel
- 6: Quartz +
- 7: Calcite
- 8: Spinel
- 9: Quartz
- 10: Chlorite
- 11: Olivine

Figure A2.43: Sample S9 Site 40 (SEM). This site contains: Detrital K-Feldspar (1), albite (2), spinel (5,8), quartz (3,6,9), chlorite (10), garnet (almandine, 4), olivine (11), and calcite (7). Lithic clasts: K-feldspar + Albite + Spinel (1-2,8, sandstone); Quartz + Chlorite (9-10, metamorphic); Quartz + Spinel inclusion (5-6, igneous).



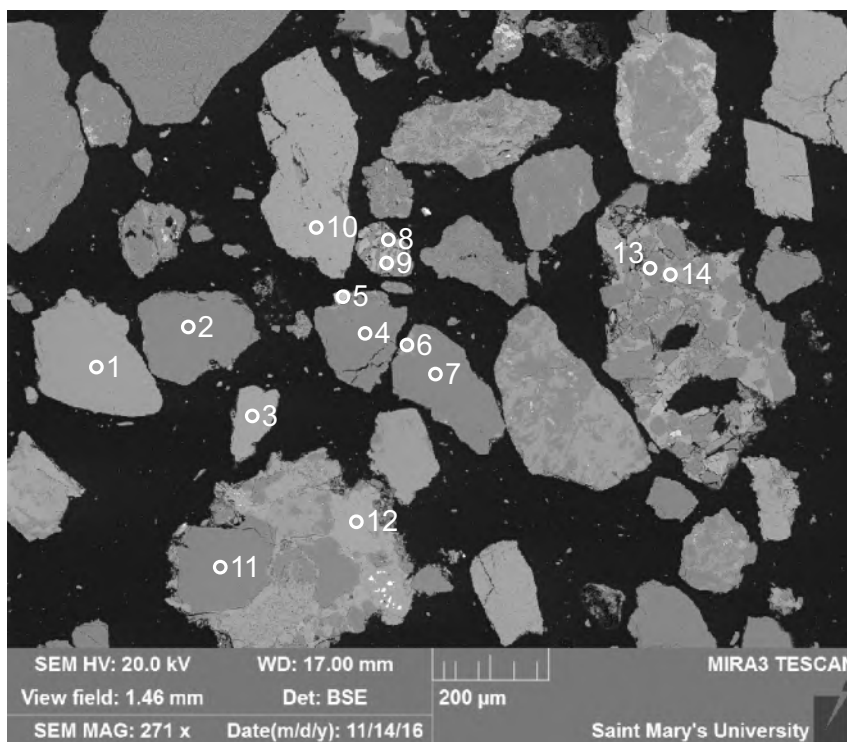

- 1: K-Feldspar
- 2: Quartz
- 3: Calcite
- 4: Quartz
- 5: Garnet (Almandine)
- 6: Calcite
- 7: Quartz
- 8: Albite
- 9: Clinopyroxene
- 10: Calcite
- 11: Quartz
- 12: Calcite
- 13: Quartz
- 14: Calcite+

Figure A2.44: Sample S9 Site 41 (SEM). This site contains: Detrital K-Feldspar (1), quartz (2,4,7,11,13), garnet (almandine, 5), calcite (3,6,10,12,14), albite (8), clinopyroxene (9). Lithic clasts: Quartz + Calcite (6-7,11-12,13-14, cherty limestone); Albite + Clinopyroxene (8-9, igneous or metamorphic); Quartz + Garnet (4-5, metamorphic).

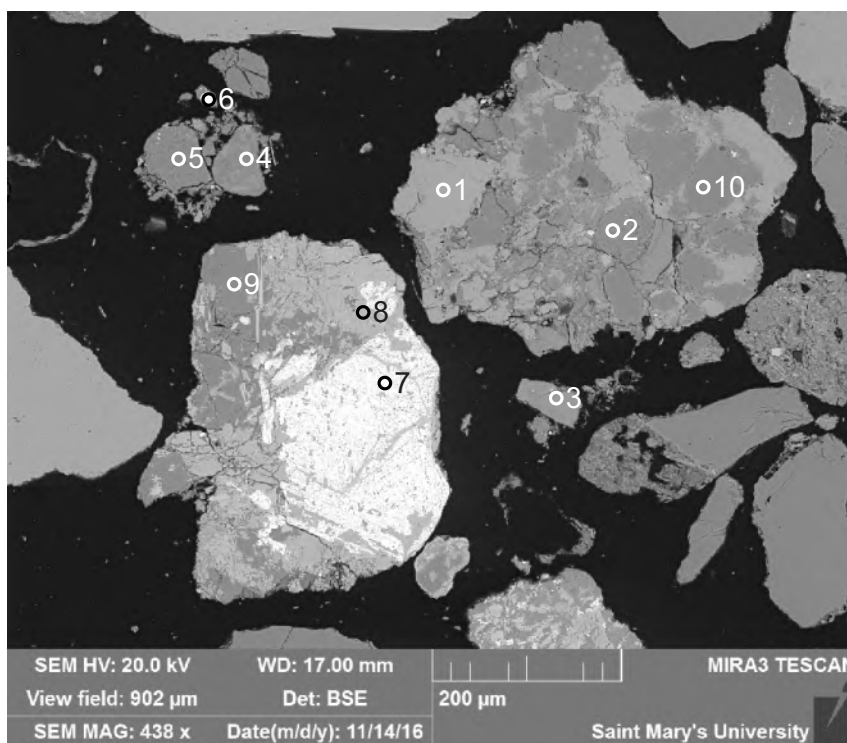

- 1: Calcite
- 2: Clay (Ill +)
- 3: Clay (Ill +)
- 4: Quartz
- 5: Quartz
- 6: Pyrite
- 7: Ilmenite +
- 8: Amphibole (Actinolite)
- 9: Albite
- 10: Quartz

Figure A2.45: Sample S9 Site 42 (SEM). This site contains: Detrital calcite (1), albite (9), quartz (4, 5, 10), pyrite (6), ilmenite (7), amphibole (8), and clay minerals (probably illite, 2-3). Lithic clasts: Quartz + Calcite + Clay (1-2,10, sandy limestone); Albite + Amphibole + Ilmenite (7-9, metamorphic).

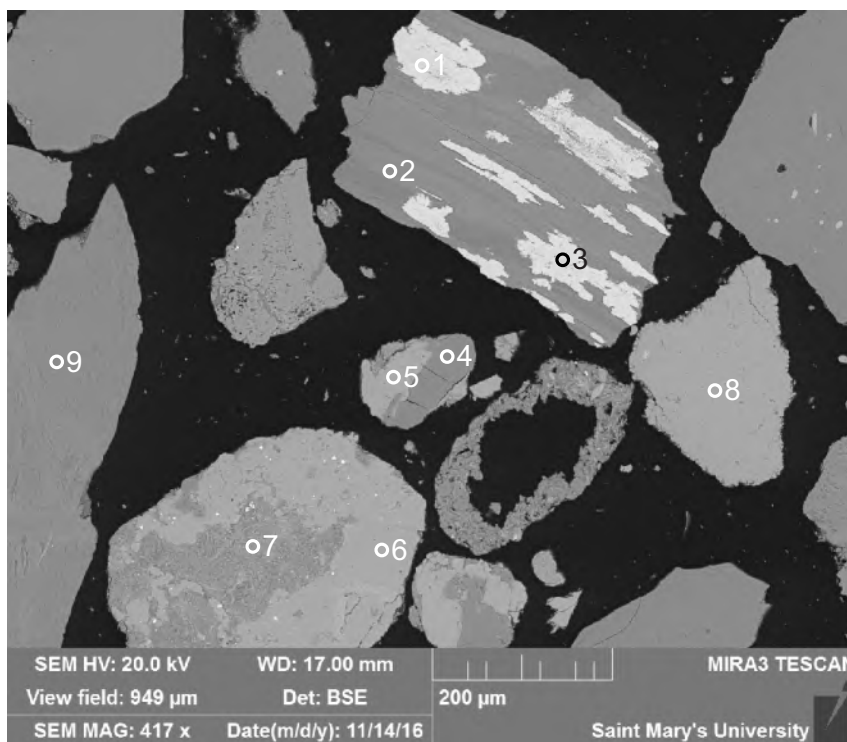

- 1: Garnet (Andradite)
- 2: "Orthopyroxene"
- 3: Garnet (Andradite)
- 4: Quartz
- 5: Calcite
- 6: Calcite
- 7: Mix
- 8: Calcite
- 9: "Orthopyroxene"

Figure A2.46: Sample S9 Site 43 (SEM). This site contains: Detrital garnet (almandine, 1,3), altered orthopyroxene (2,9), quartz (4), and calcite (5,6,8). Lithic clasts: Quartz + Calcite (4-5, cherty limestone); Garnet + Orthopyroxene (1-3, peridotite).

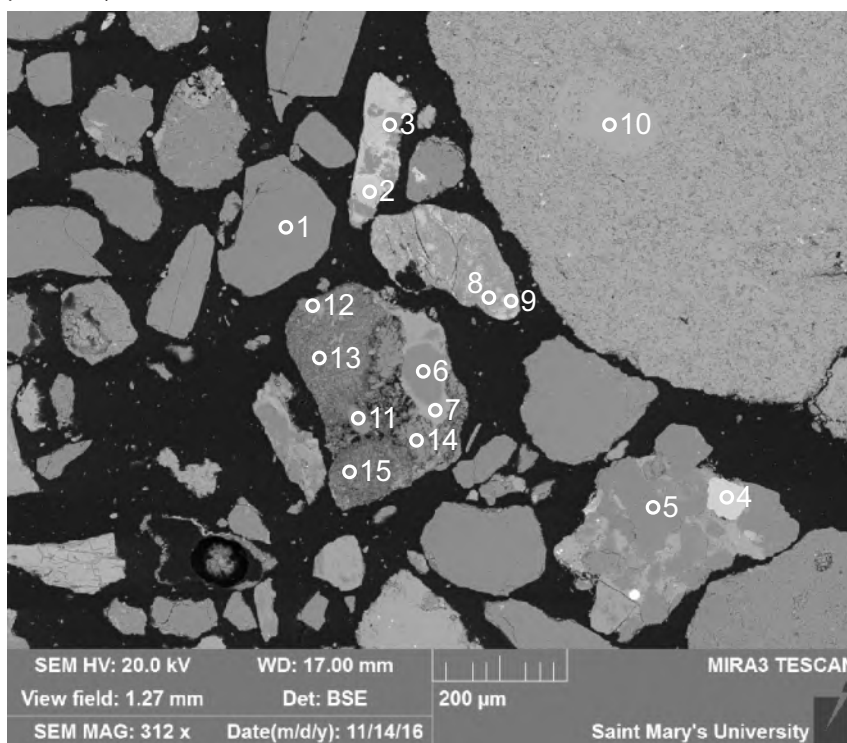

- 1: Quartz
- 2: Clinopyroxene
- 3: Albite
- 4: Garnet (Almandine-Spessartine)
- 5: Quartz
- 6: Quartz
- 7: K-Feldspar
- 8: K-Feldspar +
- 9: Titanite +
- 10: Calcite
- 11: Quartz
- 12: Albite
- 13: Feldspar
- 14: Albite
- 15: Albite

Figure A2.47: Sample S9 Site 44 (SEM). This site contains: Detrital quartz (1, 5, 6, 11), K-Feldspar (7, 8), albite (3, 12, 14, 15), titanite (9), clinopyroxene (2), garnet (4), and calcite (10). Lithic clasts: Albite + Clinopyroxene (2-3, igneous or metamorphic); K-feldspar + Titanite (8,9, metamorphic); Garnet + Quartz (4-5, metamorphic); Quartz + K-feldspar + Albite (6,7,11-15, igneous).

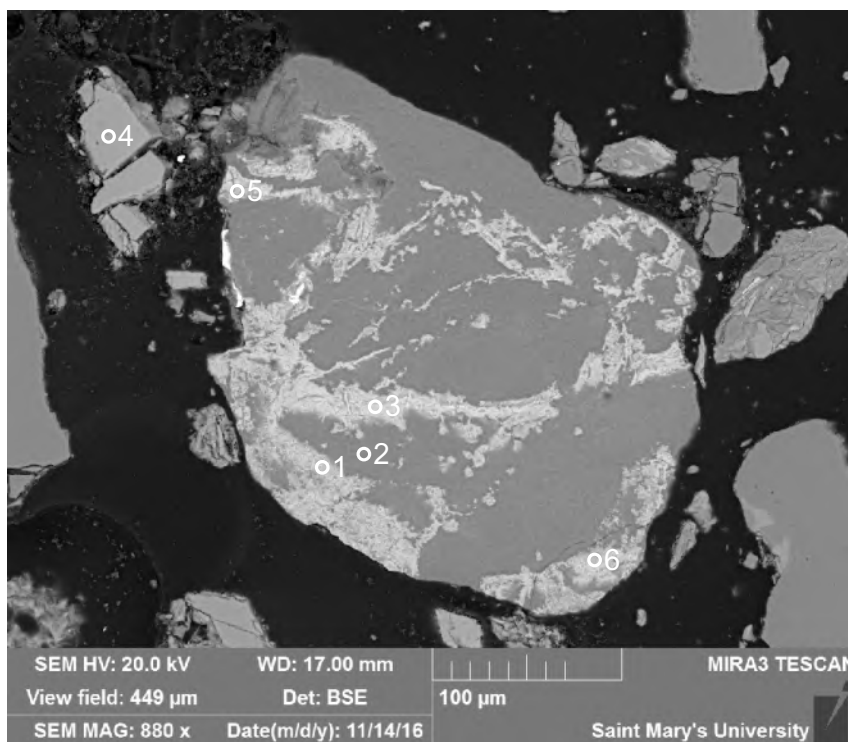

- 1: Garnet (Andradite)
- 2: “?Orthopyroxene”
- 3: Garnet
- 4: Calcite
- 5: Garnet
- 6: Garnet

Figure A2.48: Sample S9 Site 45 (SEM). This site contains: Detrital altered ?orthopyroxene (2), with veins of garnet (1, 3, 5, 6) running throughout. Lithic clast: Garnet + Orthopyroxene (1-3, 5-6, hydrothermally altered peridotite).

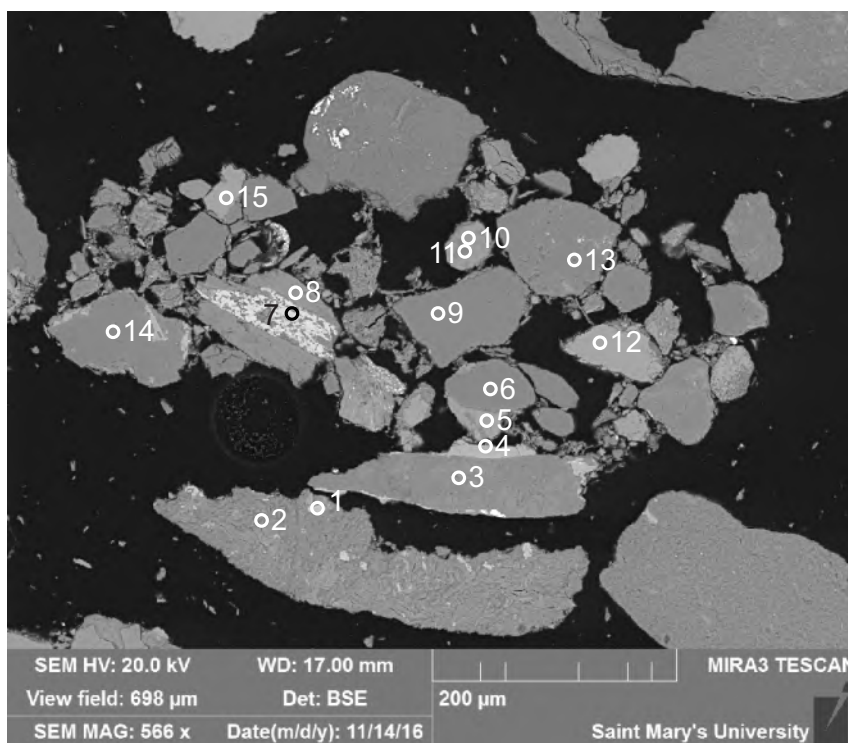

- 1: Mix
- 2: Mix
- 3: Feldspar
- 4: Clinopyroxene
- 5: Calcite
- 6: Quartz
- 7:  $\text{TiO}_2$  +
- 8: Muscovite
- 9: Quartz
- 10: K-Feldspar
- 11: Albite
- 12: Calcite
- 13: Quartz
- 14: Albite + Quartz
- 15: Calcite

Figure A2.49: Sample S9 Site 46 (SEM). This site contains: Detrital quartz (6,9,13), calcite (5,12,15), muscovite (8), K-feldspar (10), albite (11,14), titania (7), and clinopyroxene (4). Lithic clasts: Feldspar + Clinopyroxene (3-4, igneous); Quartz + Calcite (5-6, cherty limestone); K-feldspar + Albite (10-11, igneous); Muscovite + Rutile (7-8, metamorphic).



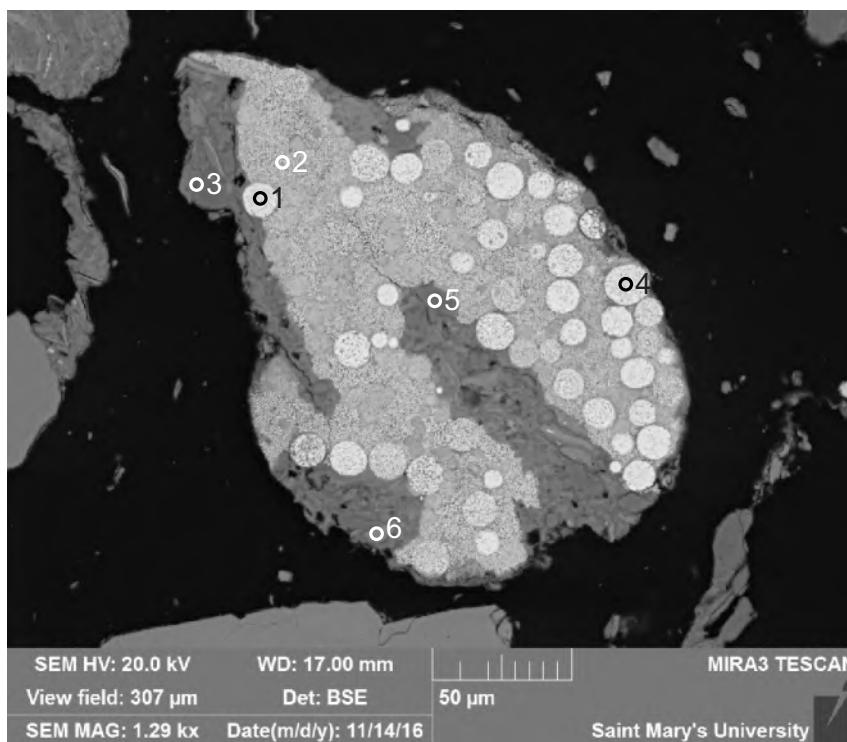

- 1: Pyrite
- 2: Pyrite + Chlorite
- 3: Quartz
- 4: Pyrite
- 5: Quartz
- 6: Biotite + Chlorite

Figure A2.50: Sample S9 Site 47 (SEM). This site contains: Detrital quartz (3), pyrite (1, 2, 4), biotite and chlorite (6). Lithic clast: Quartz + Biotite + Chlorite (1-6, siltstone cemented by pyrite some of which is framboidal).

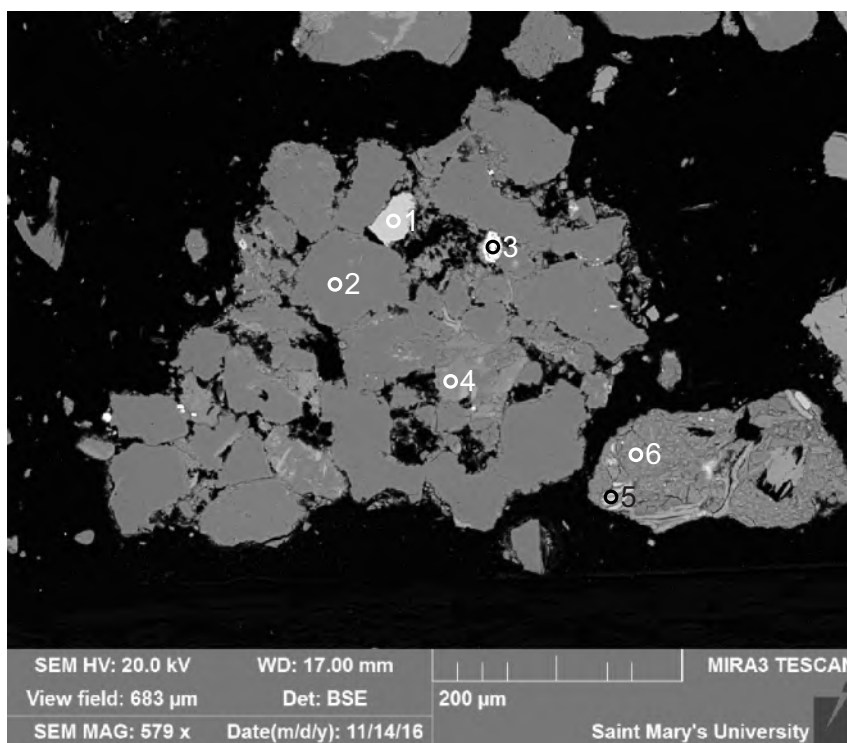

- 1: Garnet (Almandine)
- 2: Quartz
- 3: Chromite
- 4: Muscovite
- 5: Titanite
- 6: K-feldspar + Chlorite

Figure A2.51: Sample S9 Site 48 (SEM). This site contains: Detrital quartz (2), garnet (1), chromite (3), muscovite (4), titanite (5), and K-feldspar and chlorite (6). Lithic clasts: K-feldspar + Chlorite + Titanite (5-6, igneous or metamorphic); Quartz + Chromite + Garnet + Muscovite (1-4, sandstone).



Table A2.1: EDS analyses of sample S9.

| Sample | Site | Position | Mineral   | SiO2   | TiO2  | Al2O3 | FeO   | MnO  | MgO   | CaO   | Na2O  | K2O   | P2O5  | SO3 | F    | Cl   | V2O5 | Cr2O3 | NiO  | ZnO | As2O3 | ZrO2 | BaO  | WO3  | PtO2 | Total | Actual Total |
|--------|------|----------|-----------|--------|-------|-------|-------|------|-------|-------|-------|-------|-------|-----|------|------|------|-------|------|-----|-------|------|------|------|------|-------|--------------|
| S9     | 1    | 1        | Chr       |        |       | 15.06 | 18.03 |      | 12.38 |       |       |       |       |     |      |      |      | 54.52 |      |     |       |      |      |      |      | 100   | 143          |
| S9     | 1    | 2        | Qz        | 100.00 |       |       |       |      |       |       |       |       |       |     |      |      |      |       |      |     |       |      |      |      |      | 100   | 163          |
| S9     | 1    | 3        | Cal       |        |       |       |       |      | 0.94  | 55.06 |       |       |       |     |      |      |      |       |      |     |       |      |      |      |      | 56    | 75           |
| S9     | 1    | 4        | Qz        | 100.00 |       |       |       |      |       |       |       |       |       |     |      |      |      |       |      |     |       |      |      |      |      | 100   | 157          |
| S9     | 1    | 5        | Qz        | 100.00 |       |       |       |      |       |       |       |       |       |     |      |      |      |       |      |     |       |      |      |      |      | 100   | 143          |
| S9     | 1    | 6        | Cal       |        |       |       |       | 0.51 |       | 55.49 |       |       |       |     |      |      |      |       |      |     |       |      |      |      |      | 56    | 64           |
| S9     | 1    | 7        | Cal       |        |       |       |       | 0.34 |       | 55.66 |       |       |       |     |      |      |      |       |      |     |       |      |      |      |      | 56    | 71           |
| S9     | 1    | 8        | Cpx       | 53.71  | 0.50  | 1.50  | 10.41 | 0.32 | 14.59 | 18.63 | 0.34  |       |       |     |      |      |      |       |      |     |       |      |      |      |      | 100   | 136          |
| S9     | 1    | 9        | Cal       |        |       |       |       |      |       | 56.00 |       |       |       |     |      |      |      |       |      |     |       |      |      |      |      | 56    | 73           |
| S9     | 1    | 10       | Cal       |        |       |       |       |      |       | 56.00 |       |       |       |     |      |      |      |       |      |     |       |      |      |      |      | 56    | 77           |
| S9     | 2    | 1        | Grt (alm) | 40.34  |       | 20.94 | 29.62 | 0.38 | 1.94  | 6.78  |       |       |       |     |      |      |      |       |      |     |       |      |      |      |      | 100   | 136          |
| S9     | 2    | 2        | Grt (alm) | 39.77  |       | 21.12 | 28.33 | 0.75 | 1.87  | 8.15  |       |       |       |     |      |      |      |       |      |     |       |      |      |      |      | 100   | 138          |
| S9     | 2    | 3        | Cal       | 0.91   |       |       | 0.73  | 1.12 | 1.08  | 52.17 |       |       |       |     |      |      |      |       |      |     |       |      |      |      |      | 56    | 68           |
| S9     | 2    | 4        | Cal+      | 8.76   |       | 5.12  | 2.30  | 0.59 | 0.86  | 38.38 |       |       |       |     |      |      |      |       |      |     |       |      |      |      |      | 56    | 84           |
| S9     | 2    | 5        | Ab        | 69.59  |       | 18.74 |       |      |       |       | 11.67 |       |       |     |      |      |      |       |      |     |       |      |      |      |      | 100   | 143          |
| S9     | 2    | 6        | Chl       | 29.03  |       | 18.56 | 23.08 |      | 13.98 | 0.36  |       |       |       |     |      |      |      |       |      |     |       |      |      |      |      | 85    | 113          |
| S9     | 2    | 7        | Kfs       | 66.47  |       | 17.62 |       |      |       |       | 0.31  | 15.60 |       |     |      |      |      |       |      |     |       |      |      |      |      | 100   | 137          |
| S9     | 3    | 1        | Ap        | 0.73   |       |       | 0.27  |      |       | 48.73 |       |       | 43.98 |     | 4.21 | 0.67 |      |       |      |     |       |      |      | 1.41 |      | 100   | 124          |
| S9     | 3    | 2        | Ttn       | 34.03  | 32.06 | 4.42  | 0.60  |      |       | 27.55 |       |       |       |     | 1.35 |      |      |       |      |     |       |      |      |      |      | 100   | 112          |
| S9     | 3    | 3        | Chl       | 29.22  | 0.28  | 17.40 | 23.81 | 0.53 | 13.17 | 0.32  |       | 0.26  |       |     |      |      |      |       |      |     |       |      |      |      |      | 85    | 92           |
| S9     | 3    | 4        | Qz        | 100.00 |       |       |       |      |       |       |       |       |       |     |      |      |      |       |      |     |       |      |      |      |      | 100   | 115          |
| S9     | 3    | 5        | Qz        | 100.00 |       |       |       |      |       |       |       |       |       |     |      |      |      |       |      |     |       |      |      |      |      | 100   | 112          |
| S9     | 4    | 1        | Qz        | 100.00 |       |       |       |      |       |       |       |       |       |     |      |      |      |       |      |     |       |      |      |      |      | 100   | 78           |
| S9     | 4    | 2        | Kfs       | 65.77  |       | 17.74 |       |      |       |       | 0.84  | 15.09 |       |     |      |      |      |       |      |     |       |      | 0.56 |      |      | 100   | 74           |
| S9     | 4    | 3        | TiO2      | 0.63   | 98.80 |       | 0.57  |      |       |       |       |       |       |     |      |      |      |       |      |     |       |      |      |      |      | 100   | 65           |
| S9     | 4    | 4        | Qz        | 100.00 |       |       |       |      |       |       |       |       |       |     |      |      |      |       |      |     |       |      |      |      |      | 100   | 72           |
| S9     | 4    | 5        | Cal+      | 8.13   |       | 1.71  | 0.45  | 1.16 | 0.50  | 43.52 | 0.52  |       |       |     |      |      |      |       |      |     |       |      |      |      |      | 56    | 37           |
| S9     | 5    | 1        | Qz        | 100.00 |       |       |       |      |       |       |       |       |       |     |      |      |      |       |      |     |       |      |      |      |      | 100   | 117          |
| S9     | 5    | 2        | Qz        | 100.00 |       |       |       |      |       |       |       |       |       |     |      |      |      |       |      |     |       |      |      |      |      | 100   | 117          |
| S9     | 5    | 3        | Cal+      | 4.42   |       | 0.95  | 1.25  |      | 2.83  | 46.38 |       | 0.16  |       |     |      |      |      |       |      |     |       |      |      |      |      | 56    | 63           |
| S9     | 5    | 4        | Opx       | 51.06  |       |       | 3.86  |      | 45.07 |       |       |       |       |     |      |      |      |       |      |     |       |      |      |      |      | 100   | 97           |
| S9     | 5    | 5        | Mix       | 21.83  |       | 1.25  | 58.48 | 2.91 | 13.26 | 1.40  |       |       |       |     |      |      |      |       | 0.88 |     |       |      |      |      |      | 100   | 73           |
| S9     | 5    | 6        | Qz        | 100.00 |       |       |       |      |       |       |       |       |       |     |      |      |      |       |      |     |       |      |      |      |      | 100   | 110          |
| S9     | 5    | 7        | Cal       | 0.78   |       |       |       |      | 1.16  | 54.06 |       |       |       |     |      |      |      |       |      |     |       |      |      |      |      | 56    | 53           |
| S9     | 5    | 8        | Opx       | 50.70  |       |       | 7.29  |      | 40.89 | 0.39  |       |       |       |     |      | 0.22 |      |       | 0.51 |     |       |      |      |      |      | 100   | 73           |
| S9     | 5    | 9        | Qz        | 99.78  |       |       |       |      |       | 0.22  |       |       |       |     |      |      |      |       |      |     |       |      |      |      |      | 100   | 107          |
| S9     | 5    | 10       | Cal       |        |       |       | 0.30  |      | 0.50  | 55.20 |       |       |       |     |      |      |      |       |      |     |       |      |      |      |      | 56    | 50           |
| S9     | 6    | 1        | Chl       | 30.40  |       | 16.64 | 26.03 | 0.47 | 11.06 | 0.41  |       |       |       |     |      |      |      |       |      |     |       |      |      |      |      | 85    | 87           |

Table A2.1: EDS analyses of sample S9.

| Sample | Site | Position | Mineral        | SiO2   | TiO2 | Al2O3 | FeO   | MnO  | MgO   | CaO   | Na2O  | K2O   | P2O5 | SO3 | F | Cl | V2O5 | Cr2O3 | NiO  | ZnO  | As2O3 | ZrO2 | BaO  | WO3 | PtO2 | Total | Actual Total |
|--------|------|----------|----------------|--------|------|-------|-------|------|-------|-------|-------|-------|------|-----|---|----|------|-------|------|------|-------|------|------|-----|------|-------|--------------|
| S9     | 6    | 2        | Feho + Chl     | 19.32  |      | 8.01  | 63.37 | 0.74 | 6.54  | 1.18  |       |       |      |     |   |    |      |       | 0.83 |      |       |      |      |     |      | 100   | 78           |
| S9     | 7    | 1        | "Ol"           | 49.38  |      |       | 4.79  |      | 45.47 |       |       |       |      |     |   |    |      |       | 0.36 |      |       |      |      |     |      | 100   | 87           |
| S9     | 7    | 2        | Chr            |        |      | 19.23 | 29.42 |      | 8.54  |       |       |       |      |     |   |    |      | 42.81 |      |      |       |      |      |     |      | 100   | 93           |
| S9     | 7    | 3        | "Chr" +        | 2.18   |      | 2.78  | 62.89 | 4.50 | 3.01  |       |       |       |      |     |   |    |      | 24.64 |      |      |       |      |      |     |      | 100   | 86           |
| S9     | 7    | 4        | "Chr" +        | 6.74   | 0.51 | 2.15  | 51.26 | 5.80 | 8.80  |       |       |       |      |     |   |    |      | 23.91 |      | 0.82 |       |      |      |     |      | 100   | 85           |
| S9     | 7    | 5        | "Ol"           | 48.34  |      |       | 8.39  |      | 41.55 |       |       |       |      |     |   |    |      | 1.72  |      |      |       |      |      |     |      | 100   | 77           |
| S9     | 7    | 6        | Qz             | 100.00 |      |       |       |      |       |       |       |       |      |     |   |    |      |       |      |      |       |      |      |     |      | 100   | 104          |
| S9     | 7    | 7        | Ab             | 69.51  |      | 18.59 |       |      |       |       | 11.72 | 0.18  |      |     |   |    |      |       |      |      |       |      |      |     |      | 100   | 103          |
| S9     | 7    | 8        | Cal            |        |      |       |       |      | 0.77  | 55.23 |       |       |      |     |   |    |      |       |      |      |       |      |      |     |      | 56    | 49           |
| S9     | 8    | 1        | Kfs (perthite) | 65.71  |      | 18.54 |       |      |       |       | 2.10  | 12.94 |      |     |   |    |      |       |      |      |       |      | 0.72 |     |      | 100   | 95           |
| S9     | 8    | 2        | Chr            |        |      | 10.82 | 25.88 |      | 8.25  |       |       |       |      |     |   |    |      | 55.05 |      |      |       |      |      |     |      | 100   | 92           |
| S9     | 8    | 3        | Ab             | 60.14  |      | 25.46 | 1.21  |      |       | 4.29  | 6.47  | 2.43  |      |     |   |    |      |       |      |      |       |      |      |     |      | 100   | 96           |
| S9     | 8    | 4        | Chl            | 32.50  |      | 13.42 | 23.56 | 0.66 | 13.62 | 0.71  | 0.36  | 0.17  |      |     |   |    |      |       |      |      |       |      |      |     |      | 85    | 84           |
| S9     | 8    | 5        | Chl            | 24.78  | 3.09 | 10.97 | 39.93 |      | 1.92  | 0.59  |       | 3.72  |      |     |   |    |      |       |      |      |       |      |      |     |      | 85    | 80           |
| S9     | 8    | 6        | Kfs +          | 51.71  | 3.80 | 25.35 | 6.84  |      | 3.86  | 0.78  | 0.32  | 7.35  |      |     |   |    |      |       |      |      |       |      |      |     |      | 100   | 85           |
| S9     | 8    | 7        | Ab             | 65.40  |      | 18.02 |       |      |       | 5.10  | 10.35 | 1.13  |      |     |   |    |      |       |      |      |       |      |      |     |      | 100   | 91           |
| S9     | 8    | 8        | Qz             | 100.00 |      |       |       |      |       |       |       |       |      |     |   |    |      |       |      |      |       |      |      |     |      | 100   | 96           |
| S9     | 8    | 9        | Kfs            | 66.19  |      | 17.83 |       |      |       |       | 0.59  | 15.39 |      |     |   |    |      |       |      |      |       |      |      |     |      | 100   | 93           |
| S9     | 8    | 10       | Cal            |        |      |       |       |      | 0.69  | 55.31 |       |       |      |     |   |    |      |       |      |      |       |      |      |     |      | 56    | 47           |
| S9     | 8    | 11       | Qz             | 100.00 |      |       |       |      |       |       |       |       |      |     |   |    |      |       |      |      |       |      |      |     |      | 100   | 98           |
| S9     | 9    | 1        | "Ol"           | 49.49  |      | 1.78  | 5.68  |      | 42.47 |       |       |       |      |     |   |    |      |       | 0.39 |      |       |      |      |     |      | 100   | 71           |
| S9     | 9    | 2        | Qz             | 100.00 |      |       |       |      |       |       |       |       |      |     |   |    |      |       |      |      |       |      |      |     |      | 100   | 96           |
| S9     | 9    | 3        | Cal            |        |      |       |       | 0.55 |       | 55.45 |       |       |      |     |   |    |      |       |      |      |       |      |      |     |      | 56    | 45           |
| S9     | 9    | 4        | "Ol"           | 49.13  |      | 1.19  | 6.18  |      | 42.22 | 0.28  |       |       |      |     |   |    |      |       | 0.56 |      |       |      |      |     |      | 100   | 75           |
| S9     | 9    | 5        | Spl            |        |      | 32.64 | 15.75 |      | 15.47 |       |       |       |      |     |   |    |      | 36.14 |      |      |       |      |      |     |      | 100   | 88           |
| S9     | 9    | 6        | Feho +         | 1.81   |      |       | 96.83 |      | 1.36  |       |       |       |      |     |   |    |      |       |      |      |       |      |      |     |      | 100   | 76           |
| S9     | 9    | 7        | Cal            |        |      |       | 0.40  | 0.55 | 1.10  | 53.94 |       |       |      |     |   |    |      |       |      |      |       |      |      |     |      | 56    | 45           |
| S9     | 9    | 8        | Uv (Grt)       | 32.56  |      | 1.43  | 9.90  |      | 0.62  | 36.82 |       |       |      |     |   |    |      | 18.68 |      |      |       |      |      |     |      | 100   | 77           |
| S9     | 9    | 9        | "Ol"           | 47.77  |      | 1.34  | 7.10  |      | 42.55 | 0.28  |       |       |      |     |   |    |      | 0.31  | 0.38 |      |       |      |      |     |      | 100   | 72           |
| S9     | 9    | 10       | Uv (Grt)       | 35.88  |      | 4.55  | 10.92 |      | 0.85  | 36.1  |       |       |      |     |   |    |      | 11.7  |      |      |       |      |      |     |      | 100   | 74           |
| S9     | 9    | 11       | Feho +         | 9.70   |      | 2.93  | 77.96 |      | 5.76  | 0.53  |       |       |      |     |   |    |      | 3.12  |      |      |       |      |      |     |      | 100   | 61           |
| S9     | 10   | 1        | Cal            |        |      |       |       |      | 1.49  | 54.51 |       |       |      |     |   |    |      |       |      |      |       |      |      |     |      | 56    | 43           |
| S9     | 10   | 2        | Qz             | 99.63  |      |       |       |      |       | 0.37  |       |       |      |     |   |    |      |       |      |      |       |      |      |     |      | 100   | 85           |
| S9     | 10   | 3        | Qz             | 100.00 |      |       |       |      |       |       |       |       |      |     |   |    |      |       |      |      |       |      |      |     |      | 100   | 88           |
| S9     | 10   | 4        | Ab             | 69.35  |      | 18.75 |       |      |       | 0.20  | 11.70 |       |      |     |   |    |      |       |      |      |       |      |      |     |      | 100   | 89           |
| S9     | 10   | 5        | Qz             | 100.00 |      |       |       |      |       |       |       |       |      |     |   |    |      |       |      |      |       |      |      |     |      | 100   | 88           |
| S9     | 10   | 6        | Grt (Uv)       | 32.41  |      | 1.32  | 9.7   |      | 0.44  | 37.32 |       |       |      |     |   |    |      | 18.82 |      |      |       |      |      |     |      | 100   | 73           |
| S9     | 10   | 7        | Kfs            | 66.67  |      | 18.26 |       |      |       |       | 2.95  | 12.11 |      |     |   |    |      |       |      |      |       |      |      |     |      | 100   | 84           |

Table A2.1: EDS analyses of sample S9.

| Sample | Site | Position | Mineral   | SiO2   | TiO2 | Al2O3 | FeO   | MnO   | MgO   | CaO   | Na2O  | K2O   | P2O5  | SO3   | F    | Cl   | V2O5 | Cr2O3 | NiO  | ZnO | As2O3 | ZrO2 | BaO  | WO3  | PtO2 | Total | Actual Total |
|--------|------|----------|-----------|--------|------|-------|-------|-------|-------|-------|-------|-------|-------|-------|------|------|------|-------|------|-----|-------|------|------|------|------|-------|--------------|
| S9     | 10   | 8        | Ms        | 51.74  |      | 26.09 | 3.03  |       | 3.46  |       | 0.37  | 10.10 |       |       |      | 0.22 |      |       |      |     |       |      |      |      |      | 95    | 66           |
| S9     | 11   | 1        | Kfs       | 65.39  |      | 18.18 |       |       |       |       | 0.46  | 15.13 |       |       |      |      |      |       |      |     |       |      | 0.85 |      |      | 100   | 83           |
| S9     | 11   | 2        | Qz +      | 95.41  |      | 2.90  |       |       |       |       | 1.69  |       |       |       |      |      |      |       |      |     |       |      |      |      |      | 100   | 85           |
| S9     | 11   | 3        | Qz        | 100.00 |      |       |       |       |       |       |       |       |       |       |      |      |      |       |      |     |       |      |      |      |      | 100   | 86           |
| S9     | 11   | 4        | Ms+       | 56.34  |      | 22.86 | 5.85  |       | 5.97  | 1.36  | 0.58  | 6.30  | 0.75  |       |      |      |      |       |      |     |       |      |      |      |      | 100   | 80           |
| S9     | 11   | 5        | Mix       | 54.94  | 2.94 | 14.14 | 9.86  |       | 6.06  | 4.16  | 5.03  | 2.25  | 0.62  |       |      |      |      |       |      |     |       |      |      |      |      | 100   | 81           |
| S9     | 11   | 6        | Qz        | 100.00 |      |       |       |       |       |       |       |       |       |       |      |      |      |       |      |     |       |      |      |      |      | 100   | 87           |
| S9     | 11   | 7        | Grt (alm) | 39.81  |      | 20.94 | 27.07 | 2.75  | 1.06  | 8.37  |       |       |       |       |      |      |      |       |      |     |       |      |      |      |      | 100   | 81           |
| S9     | 11   | 8        | "Ol"      | 50.70  |      |       | 5.03  |       | 43.89 |       |       |       |       |       |      |      |      |       | 0.37 |     |       |      |      |      |      | 100   | 64           |
| S9     | 11   | 9        | Cal       | 0.85   |      |       |       |       | 0.70  | 54.45 |       |       |       |       |      |      |      |       |      |     |       |      |      |      |      | 56    | 41           |
| S9     | 11   | 10       | Cal+      | 9.84   |      | 4.12  | 1.81  | 0.76  | 5.08  | 33.79 |       | 0.59  |       |       |      |      |      |       |      |     |       |      |      |      |      | 56    | 50           |
| S9     | 11   | 11       | Clay      | 59.08  | 0.30 | 20.27 | 5.91  | 0.30  | 4.65  | 0.55  | 0.32  | 8.62  |       |       |      |      |      |       |      |     |       |      |      |      |      | 100   | 76           |
| S9     | 12   | 1        | Clay      | 59.95  |      | 21.03 | 5.42  |       | 4.55  | 0.62  |       | 8.44  |       |       |      |      |      |       |      |     |       |      |      |      |      | 100   | 78           |
| S9     | 12   | 2        | Cal       | 0.99   |      |       |       |       |       | 55.01 |       |       |       |       |      |      |      |       |      |     |       |      |      |      |      | 56    | 42           |
| S9     | 12   | 3        | Qz+       | 81.96  |      | 6.72  | 7.80  | 0.24  | 2.55  | 0.27  |       | 0.47  |       |       |      |      |      |       |      |     |       |      |      |      |      | 100   | 90           |
| S9     | 12   | 4        | Ab        | 68.25  |      | 18.68 | 0.47  |       | 0.85  | 0.47  | 11.28 |       |       |       |      |      |      |       |      |     |       |      |      |      |      | 100   | 90           |
| S9     | 13   | 1        | Cal       |        |      |       |       |       | 1.28  | 54.72 |       |       |       |       |      |      |      |       |      |     |       |      |      |      |      | 56    | 46           |
| S9     | 13   | 2        | Qz +      | 93.14  |      |       |       |       |       | 6.86  |       |       |       |       |      |      |      |       |      |     |       |      |      |      |      | 100   | 90           |
| S9     | 13   | 3        | Cal       |        |      |       |       |       | 1.40  | 54.60 |       |       |       |       |      |      |      |       |      |     |       |      |      |      |      | 56    | 45           |
| S9     | 13   | 4        | Qz        | 100.00 |      |       |       |       |       |       |       |       |       |       |      |      |      |       |      |     |       |      |      |      |      | 100   | 97           |
| S9     | 13   | 5        | Ap        |        |      |       |       |       |       | 47.95 |       |       | 43.66 |       | 6.63 |      |      |       |      |     |       |      |      | 1.76 |      | 100   | 104          |
| S9     | 13   | 6        | Ab        | 69.31  |      | 19.10 |       |       |       |       | 11.58 |       |       |       |      |      |      |       |      |     |       |      |      |      |      | 100   | 100          |
| S9     | 13   | 7        | Py        | 0.31   |      |       | 27.40 | 0.40  |       |       | 0.53  |       |       | 69.80 |      |      |      |       |      |     |       |      |      |      | 1.57 | 100   | 194          |
| S9     | 13   | 8        | Py        |        |      |       | 27.53 | 0.50  |       |       | 0.56  |       |       | 71.41 |      |      |      |       |      |     |       |      |      |      |      | 100   | 194          |
| S9     | 13   | 9        | Py        | 0.29   |      |       | 28.36 |       |       |       |       |       |       | 71.35 |      |      |      |       |      |     |       |      |      |      |      | 100   | 201          |
| S9     | 14   | 1        | Spl       |        |      | 30.07 | 17.82 |       | 14.24 |       |       |       |       |       |      |      |      | 37.86 |      |     |       |      |      |      |      | 100   | 124          |
| S9     | 14   | 2        | Cal       |        |      |       |       |       |       | 56.00 |       |       |       |       |      |      |      |       |      |     |       |      |      |      |      | 56    | 64           |
| S9     | 14   | 3        | Qz        | 100.00 |      |       |       |       |       |       |       |       |       |       |      |      |      |       |      |     |       |      |      |      |      | 100   | 135          |
| S9     | 14   | 4        | Pl        | 57.22  |      | 26.85 | 1.49  |       | 0.38  | 6.98  | 5.06  | 2.00  |       |       |      |      |      |       |      |     |       |      |      |      |      | 100   | 133          |
| S9     | 14   | 5        | Cpx       | 50.81  | 1.71 | 4.32  | 13.79 | 0.30  | 15.25 | 13.82 |       |       |       |       |      |      |      |       |      |     |       |      |      |      |      | 100   | 133          |
| S9     | 14   | 6        | Feho +    | 10.12  | 7.95 | 1.89  | 74.50 | 0.46  | 0.90  | 4.18  |       |       |       |       |      |      |      |       |      |     |       |      |      |      |      | 100   | 109          |
| S9     | 14   | 7        | Feho +    | 7.31   | 3.92 | 2.57  | 82.85 | 0.43  | 1.68  | 0.80  |       |       |       |       |      |      | 0.45 |       |      |     |       |      |      |      |      | 100   | 107          |
| S9     | 14   | 8        | Cal       |        |      |       | 0.40  |       | 0.84  | 54.76 |       |       |       |       |      |      |      |       |      |     |       |      |      |      |      | 56    | 67           |
| S9     | 14   | 9        | Qz        | 100.00 |      |       |       |       |       |       |       |       |       |       |      |      |      |       |      |     |       |      |      |      |      | 100   | 144          |
| S9     | 15   | 1        | Cal       | 0.48   |      |       | 0.34  |       | 0.66  | 54.52 |       |       |       |       |      |      |      |       |      |     |       |      |      |      |      | 56    | 66           |
| S9     | 15   | 2        | Qz +      | 97.45  |      | 1.90  | 0.22  |       |       |       |       | 0.43  |       |       |      |      |      |       |      |     |       |      |      |      |      | 100   | 129          |
| S9     | 15   | 3        | Grt       | 39.57  |      | 20.43 | 15.32 | 17.80 | 1.06  | 5.81  |       |       |       |       |      |      |      |       |      |     |       |      |      |      |      | 100   | 130          |
| S9     | 15   | 4        | Cal       |        |      |       |       |       |       | 56.00 |       |       |       |       |      |      |      |       |      |     |       |      |      |      |      | 56    | 68           |

Table A2.1: EDS analyses of sample S9.

| Sample | Site | Position | Mineral  | SiO2   | TiO2  | Al2O3 | FeO   | MnO  | MgO   | CaO   | Na2O  | K2O   | P2O5 | SO3 | F | Cl | V2O5 | Cr2O3 | NiO | ZnO | As2O3 | ZrO2  | BaO | WO3 | PtO2 | Total | Actual Total |
|--------|------|----------|----------|--------|-------|-------|-------|------|-------|-------|-------|-------|------|-----|---|----|------|-------|-----|-----|-------|-------|-----|-----|------|-------|--------------|
| S9     | 15   | 5        | Qz       | 100.00 |       |       |       |      |       |       |       |       |      |     |   |    |      |       |     |     |       |       |     |     |      | 100   | 146          |
| S9     | 15   | 6        | Qz       | 100.00 |       |       |       |      |       |       |       |       |      |     |   |    |      |       |     |     |       |       |     |     |      | 100   | 142          |
| S9     | 15   | 7        | Clay     | 56.34  |       | 21.83 | 5.98  | 0.24 | 7.37  |       |       | 8.24  |      |     |   |    |      |       |     |     |       |       |     |     |      | 100   | 124          |
| S9     | 15   | 8        | Cal      |        |       |       | 0.36  | 0.94 | 0.51  | 54.20 |       |       |      |     |   |    |      |       |     |     |       |       |     |     |      | 56    | 66           |
| S9     | 15   | 9        | Qz       | 100.00 |       |       |       |      |       |       |       |       |      |     |   |    |      |       |     |     |       |       |     |     |      | 100   | 140          |
| S9     | 15   | 10       | Dol      |        |       |       |       |      | 22.83 | 31.17 |       |       |      |     |   |    |      |       |     |     |       |       |     |     |      | 54    | 65           |
| S9     | 15   | 11       | Cal      |        |       |       |       |      |       | 56.00 |       |       |      |     |   |    |      |       |     |     |       |       |     |     |      | 56    | 74           |
| S9     | 16   | 1        | Ab       | 69.50  |       | 18.85 |       |      |       |       | 11.65 |       |      |     |   |    |      |       |     |     |       |       |     |     |      | 100   | 136          |
| S9     | 16   | 2        | Opx      | 52.99  |       | 2.84  | 5.70  |      | 37.32 | 0.72  | 0.42  |       |      |     |   |    |      |       |     |     |       |       |     |     |      | 100   | 117          |
| S9     | 16   | 3        | Qz       | 100.00 |       |       |       |      |       |       |       |       |      |     |   |    |      |       |     |     |       |       |     |     |      | 100   | 138          |
| S9     | 16   | 4        | Ep       | 40.35  |       | 27.10 | 6.73  |      |       | 22.81 |       |       |      |     |   |    |      |       |     |     |       |       |     |     |      | 97    | 128          |
| S9     | 16   | 5        | Qz       | 100.00 |       |       |       |      |       |       |       |       |      |     |   |    |      |       |     |     |       |       |     |     |      | 100   | 139          |
| S9     | 16   | 6        | Qz+      | 86.09  |       | 7.76  | 1.78  |      | 1.42  | 0.22  |       | 2.73  |      |     |   |    |      |       |     |     |       |       |     |     |      | 100   | 142          |
| S9     | 16   | 7        | Cal      |        |       |       |       |      | 1.09  | 54.91 |       |       |      |     |   |    |      |       |     |     |       |       |     |     |      | 56    | 67           |
| S9     | 16   | 8        | Chl +    | 33.02  |       | 14.85 | 14.00 | 0.34 | 19.86 | 2.93  |       |       |      |     |   |    |      |       |     |     |       |       |     |     |      | 85    | 119          |
| S9     | 17   | 1        | Qz +     | 94.38  |       | 3.40  | 0.69  |      | 0.51  |       |       | 1.02  |      |     |   |    |      |       |     |     |       |       |     |     |      | 100   | 142          |
| S9     | 17   | 2        | Qz       | 100.00 |       |       |       |      |       |       |       |       |      |     |   |    |      |       |     |     |       |       |     |     |      | 100   | 142          |
| S9     | 17   | 3        | Chl      | 31.65  |       | 14.54 | 26.02 | 1.01 | 10.68 | 0.55  | 0.54  |       |      |     |   |    |      |       |     |     |       |       |     |     |      | 85    | 115          |
| S9     | 17   | 4        | Qz       | 100.00 |       |       |       |      |       |       |       |       |      |     |   |    |      |       |     |     |       |       |     |     |      | 100   | 143          |
| S9     | 17   | 5        | Qz       | 100.00 |       |       |       |      |       |       |       |       |      |     |   |    |      |       |     |     |       |       |     |     |      | 100   | 143          |
| S9     | 17   | 6        | Chl      | 25.32  |       | 21.02 | 28.14 |      | 10.51 |       |       |       |      |     |   |    |      |       |     |     |       |       |     |     |      | 85    | 118          |
| S9     | 17   | 7        | Ms       | 50.25  | 0.44  | 27.06 | 4.12  |      | 2.46  |       | 0.32  | 10.36 |      |     |   |    |      |       |     |     |       |       |     |     |      | 95    | 130          |
| S9     | 17   | 8        | Chl      | 26.56  |       | 19.33 | 27.88 |      | 11.24 |       |       |       |      |     |   |    |      |       |     |     |       |       |     |     |      | 85    | 117          |
| S9     | 17   | 9        | Mag +    | 5.59   |       | 0.75  | 92.64 |      |       | 1.02  |       |       |      |     |   |    |      |       |     |     |       |       |     |     |      | 100   | 96           |
| S9     | 17   | 10       | Cal      | 0.81   |       |       |       | 0.36 | 0.33  | 54.50 |       |       |      |     |   |    |      |       |     |     |       |       |     |     |      | 56    | 68           |
| S9     | 17   | 11       | Cal      | 1.55   |       | 0.54  | 0.37  |      |       | 53.26 |       | 0.29  |      |     |   |    |      |       |     |     |       |       |     |     |      | 56    | 69           |
| S9     | 17   | 12       | Zrn      | 31.19  |       |       | 0.72  |      |       |       |       |       |      |     |   |    |      |       |     |     |       | 68.09 |     |     |      | 100   | 144          |
| S9     | 18   | 1        | Cal      |        |       |       | 0.33  | 0.83 | 0.54  | 54.30 |       |       |      |     |   |    |      |       |     |     |       |       |     |     |      | 56    | 63           |
| S9     | 18   | 2        | "Ol"     | 47.89  |       | 3.01  | 6.29  |      | 41.55 |       |       |       |      |     |   |    |      | 1.26  |     |     |       |       |     |     |      | 100   | 118          |
| S9     | 18   | 3        | Feho     | 0.99   | 10.81 | 4.14  | 81.02 | 0.70 | 1.05  |       |       |       |      |     |   |    | 1.28 |       |     |     |       |       |     |     |      | 100   | 121          |
| S9     | 18   | 4        | Ab       | 69.18  |       | 18.82 |       |      |       | 0.22  | 11.77 |       |      |     |   |    |      |       |     |     |       |       |     |     |      | 100   | 140          |
| S9     | 18   | 5        | Qz       | 100.00 |       |       |       |      |       |       |       |       |      |     |   |    |      |       |     |     |       |       |     |     |      | 100   | 137          |
| S9     | 18   | 6        | Qz       | 100.00 |       |       |       |      |       |       |       |       |      |     |   |    |      |       |     |     |       |       |     |     |      | 100   | 145          |
| S9     | 18   | 7        | Cal+     | 4.98   |       | 0.69  | 0.59  | 0.28 | 2.40  | 47.06 |       |       |      |     |   |    |      |       |     |     |       |       |     |     |      | 56    | 74           |
| S9     | 18   | 8        | Chl + Ab | 41.50  |       | 19.95 | 23.85 | 0.67 | 10.27 |       | 3.75  |       |      |     |   |    |      |       |     |     |       |       |     |     |      | 100   | 119          |
| S9     | 18   | 9        | Ab +     | 61.91  |       | 18.30 | 6.58  |      | 2.81  | 0.71  | 9.70  |       |      |     |   |    |      |       |     |     |       |       |     |     |      | 100   | 137          |
| S9     | 18   | 10       | Cal      |        |       |       |       |      | 0.72  | 55.28 |       |       |      |     |   |    |      |       |     |     |       |       |     |     |      | 56    | 61           |
| S9     | 18   | 11       | Qz       | 99.41  |       | 0.59  |       |      |       |       |       |       |      |     |   |    |      |       |     |     |       |       |     |     |      | 100   | 131          |



Table A2.1: EDS analyses of sample S9.

| Sample | Site | Position | Mineral           | SiO2   | TiO2  | Al2O3 | FeO   | MnO  | MgO   | CaO   | Na2O  | K2O   | P2O5 | SO3 | F | Cl | V2O5 | Cr2O3 | NiO | ZnO | As2O3 | ZrO2 | BaO  | WO3 | PtO2 | Total | Actual Total |
|--------|------|----------|-------------------|--------|-------|-------|-------|------|-------|-------|-------|-------|------|-----|---|----|------|-------|-----|-----|-------|------|------|-----|------|-------|--------------|
| S9     | 18   | 12       | Qz                | 100.00 |       |       |       |      |       |       |       |       |      |     |   |    |      |       |     |     |       |      |      |     |      | 100   | 134          |
| S9     | 18   | 13       | Kfs               | 66.28  |       | 18.18 |       |      |       |       | 1.24  | 14.30 |      |     |   |    |      |       |     |     |       |      |      |     |      | 100   | 128          |
| S9     | 18   | 14       | Cal               | 1.26   |       |       |       | 0.36 | 1.09  | 53.30 |       |       |      |     |   |    |      |       |     |     |       |      |      |     |      | 56    | 71           |
| S9     | 18   | 15       | Kfs +             | 53.76  | 0.40  | 26.23 | 4.71  |      | 3.50  |       | 0.36  | 11.04 |      |     |   |    |      |       |     |     |       |      |      |     |      | 100   | 117          |
| S9     | 18   | 16       | Cal               |        |       |       |       | 0.59 |       | 55.41 |       |       |      |     |   |    |      |       |     |     |       |      |      |     |      | 56    | 64           |
| S9     | 18   | 17       | Cal               |        |       |       |       | 0.84 |       | 55.16 |       |       |      |     |   |    |      |       |     |     |       |      |      |     |      | 56    | 58           |
| S9     | 19   | 1        | Cal               |        |       |       | 1.03  |      |       | 54.97 |       |       |      |     |   |    |      |       |     |     |       |      |      |     |      | 56    | 65           |
| S9     | 19   | 2        | Ep                | 40.65  |       | 24.57 | 9.37  |      |       | 22.41 |       |       |      |     |   |    |      |       |     |     |       |      |      |     |      | 97    | 133          |
| S9     | 19   | 3        | Spl               |        |       | 39.39 | 15.54 |      | 15.96 | 0.29  |       |       |      |     |   |    |      | 28.82 |     |     |       |      |      |     |      | 100   | 131          |
| S9     | 19   | 4        | Ab                | 68.30  |       | 19.50 |       |      |       | 0.28  | 11.26 | 0.66  |      |     |   |    |      |       |     |     |       |      |      |     |      | 100   | 141          |
| S9     | 19   | 5        | Grt               | 40.00  |       | 20.76 | 26.94 | 4.48 | 1.86  | 5.96  |       |       |      |     |   |    |      |       |     |     |       |      |      |     |      | 100   | 134          |
| S9     | 19   | 6        | Ttn +             | 26.06  | 50.50 | 0.58  | 1.79  |      |       | 21.08 |       |       |      |     |   |    |      |       |     |     |       |      |      |     |      | 100   | 131          |
| S9     | 19   | 7        | Ms                | 47.31  | 0.52  | 35.86 | 0.77  |      | 0.42  |       | 1.93  | 8.20  |      |     |   |    |      |       |     |     |       |      |      |     |      | 95    | 127          |
| S9     | 19   | 8        | Grt               | 39.71  |       | 20.94 | 23.40 | 6.30 | 0.95  | 8.69  |       |       |      |     |   |    |      |       |     |     |       |      |      |     |      | 100   | 137          |
| S9     | 19   | 9        | TiO2              |        | 98.45 |       | 0.41  |      |       | 1.13  |       |       |      |     |   |    |      |       |     |     |       |      |      |     |      | 100   | 131          |
| S9     | 19   | 10       | Qz                | 100.00 |       |       |       |      |       |       |       |       |      |     |   |    |      |       |     |     |       |      |      |     |      | 100   | 139          |
| S9     | 19   | 11       | Cal               |        |       |       | 0.68  | 0.33 | 0.84  | 54.15 |       |       |      |     |   |    |      |       |     |     |       |      |      |     |      | 56    | 63           |
| S9     | 19   | 12       | Cal               |        |       |       |       | 0.80 | 0.48  | 54.72 |       |       |      |     |   |    |      |       |     |     |       |      |      |     |      | 56    | 68           |
| S9     | 19   | 13       | Qz                | 99.78  |       |       |       |      |       | 0.22  |       |       |      |     |   |    |      |       |     |     |       |      |      |     |      | 100   | 144          |
| S9     | 19   | 14       | Kfs               | 65.46  |       | 17.97 | 0.46  |      |       |       | 0.42  | 15.19 |      |     |   |    |      |       |     |     |       |      | 0.51 |     |      | 100   | 136          |
| S9     | 19   | 15       | Ab                | 68.75  |       | 19.50 |       |      |       |       | 11.56 | 0.19  |      |     |   |    |      |       |     |     |       |      |      |     |      | 100   | 137          |
| S9     | 19   | 16       | Dol               |        |       |       |       |      | 22.62 | 31.38 |       |       |      |     |   |    |      |       |     |     |       |      |      |     |      | 54    | 67           |
| S9     | 20   | 1        | Qz                | 100.00 |       |       |       |      |       |       |       |       |      |     |   |    |      |       |     |     |       |      |      |     |      | 100   | 139          |
| S9     | 20   | 2        | Cal               |        |       |       |       |      | 0.79  | 55.21 |       |       |      |     |   |    |      |       |     |     |       |      |      |     |      | 56    | 64           |
| S9     | 20   | 3        | TiO2              | 0.51   | 98.77 |       | 0.42  |      |       | 0.30  |       |       |      |     |   |    |      |       |     |     |       |      |      |     |      | 100   | 123          |
| S9     | 20   | 4        | Qz                | 100.00 |       |       |       |      |       |       |       |       |      |     |   |    |      |       |     |     |       |      |      |     |      | 100   | 140          |
| S9     | 20   | 5        | Cal               |        |       |       |       |      | 0.53  | 55.47 |       |       |      |     |   |    |      |       |     |     |       |      |      |     |      | 56    | 65           |
| S9     | 20   | 6        | Ab                | 69.22  |       | 18.92 |       |      |       | 0.18  | 11.69 |       |      |     |   |    |      |       |     |     |       |      |      |     |      | 100   | 137          |
| S9     | 20   | 7        | Cal+              | 4.36   |       | 0.88  | 0.41  |      | 0.69  | 49.66 |       |       |      |     |   |    |      |       |     |     |       |      |      |     |      | 56    | 67           |
| S9     | 20   | 8        | Qz                | 100.00 |       |       |       |      |       |       |       |       |      |     |   |    |      |       |     |     |       |      |      |     |      | 100   | 139          |
| S9     | 20   | 9        | Qz                | 100.00 |       |       |       |      |       |       |       |       |      |     |   |    |      |       |     |     |       |      |      |     |      | 100   | 144          |
| S9     | 20   | 10       | Kfs               | 66.35  |       | 17.85 |       |      |       |       | 0.41  | 15.39 |      |     |   |    |      |       |     |     |       |      |      |     |      | 100   | 141          |
| S9     | 20   | 11       | Qz                | 100.00 |       |       |       |      |       |       |       |       |      |     |   |    |      |       |     |     |       |      |      |     |      | 100   | 142          |
| S9     | 20   | 12       | Chl               | 31.11  |       | 18.16 | 26.56 |      | 8.82  | 0.34  |       |       |      |     |   |    |      |       |     |     |       |      |      |     |      | 85    | 113          |
| S9     | 20   | 13       | Kfs               | 58.27  |       | 28.12 | 0.95  |      | 0.45  | 2.00  | 4.46  | 5.75  |      |     |   |    |      |       |     |     |       |      |      |     |      | 100   | 134          |
| S9     | 20   | 14       | Amph (Actinolite) | 50.46  | 1.04  | 2.05  | 16.02 | 0.45 | 12.74 | 13.94 | 0.31  |       |      |     |   |    |      |       |     |     |       |      |      |     |      | 97    | 134          |
| S9     | 20   | 15       | Qz                | 100.00 |       |       |       |      |       |       |       |       |      |     |   |    |      |       |     |     |       |      |      |     |      | 100   | 141          |
| S9     | 20   | 16       | Qz                | 100.00 |       |       |       |      |       |       |       |       |      |     |   |    |      |       |     |     |       |      |      |     |      | 100   | 143          |

Table A2.1: EDS analyses of sample S9.

| Sample | Site | Position | Mineral    | SiO2   | TiO2  | Al2O3 | FeO   | MnO  | MgO   | CaO   | Na2O  | K2O   | P2O5 | SO3 | F | Cl | V2O5 | Cr2O3 | NiO | ZnO | As2O3 | ZrO2 | BaO | WO3 | PtO2 | Total | Actual Total |
|--------|------|----------|------------|--------|-------|-------|-------|------|-------|-------|-------|-------|------|-----|---|----|------|-------|-----|-----|-------|------|-----|-----|------|-------|--------------|
| S9     | 20   | 17       | Feho +     | 1.92   |       |       | 96.98 |      | 1.10  |       |       |       |      |     |   |    |      |       |     |     |       |      |     |     |      | 100   | 110          |
| S9     | 20   | 18       | Feho +     | 6.88   |       |       | 86.71 | 0.36 | 5.09  |       |       |       |      |     |   |    |      | 0.96  |     |     |       |      |     |     |      | 100   | 110          |
| S9     | 20   | 19       | Opx        | 50.62  |       | 0.57  | 4.33  |      | 44.48 |       |       |       |      |     |   |    |      |       |     |     |       |      |     |     |      | 100   | 115          |
| S9     | 20   | 20       | Cal        |        |       |       | 0.94  | 0.89 | 0.36  | 53.81 |       |       |      |     |   |    |      |       |     |     |       |      |     |     |      | 56    | 66           |
| S9     | 20   | 21       | Qz         | 100.00 |       |       |       |      |       |       |       |       |      |     |   |    |      |       |     |     |       |      |     |     |      | 100   | 143          |
| S9     | 20   | 22       | Ab         | 69.22  |       | 18.89 |       |      |       | 0.38  | 11.51 |       |      |     |   |    |      |       |     |     |       |      |     |     |      | 100   | 145          |
| S9     | 20   | 23       | Cal        | 0.45   |       |       |       | 0.29 |       | 55.26 |       |       |      |     |   |    |      |       |     |     |       |      |     |     |      | 56    | 69           |
| S9     | 20   | 24       | Cal        | 0.53   |       |       |       |      |       | 55.47 |       |       |      |     |   |    |      |       |     |     |       |      |     |     |      | 56    | 66           |
| S9     | 20   | 25       | Chl        | 31.22  |       | 15.45 | 18.76 |      | 19.27 | 0.30  |       |       |      |     |   |    |      |       |     |     |       |      |     |     |      | 85    | 119          |
| S9     | 21   | 1        | Cal        |        |       |       |       |      | 1.00  | 55.00 |       |       |      |     |   |    |      |       |     |     |       |      |     |     |      | 56    | 64           |
| S9     | 21   | 2        | Qz         | 100.00 |       |       |       |      |       |       |       |       |      |     |   |    |      |       |     |     |       |      |     |     |      | 100   | 133          |
| S9     | 21   | 3        | Grt (Andr) | 39.04  |       | 0.57  | 25.59 |      | 3.68  | 31.12 |       |       |      |     |   |    |      |       |     |     |       |      |     |     |      | 100   | 125          |
| S9     | 21   | 4        | Chr        |        |       | 13.66 | 17.55 |      | 11.96 |       |       |       |      |     |   |    |      | 56.83 |     |     |       |      |     |     |      | 100   | 133          |
| S9     | 21   | 5        | Cal        |        |       |       |       | 0.67 |       | 55.33 |       |       |      |     |   |    |      |       |     |     |       |      |     |     |      | 56    | 69           |
| S9     | 21   | 6        | Qz         | 100.00 |       |       |       |      |       |       |       |       |      |     |   |    |      |       |     |     |       |      |     |     |      | 100   | 150          |
| S9     | 21   | 7        | Cal        |        |       |       |       |      | 0.81  | 55.19 |       |       |      |     |   |    |      |       |     |     |       |      |     |     |      | 56    | 70           |
| S9     | 21   | 8        | Qz         | 100.00 |       |       |       |      |       |       |       |       |      |     |   |    |      |       |     |     |       |      |     |     |      | 100   | 147          |
| S9     | 21   | 9        | Spl        |        | 0.68  | 27.26 | 23.33 |      | 12.67 |       |       |       |      |     |   |    |      | 36.06 |     |     |       |      |     |     |      | 100   | 127          |
| S9     | 21   | 10       | Chl        | 35.39  |       | 11.95 | 10.60 | 0.31 | 25.79 | 0.31  |       |       |      |     |   |    |      | 0.65  |     |     |       |      |     |     |      | 85    | 115          |
| S9     | 21   | 11       | Cal        |        |       |       |       |      |       | 56.00 |       |       |      |     |   |    |      |       |     |     |       |      |     |     |      | 56    | 67           |
| S9     | 21   | 12       | Chr        |        |       | 21.52 | 19.08 |      | 12.79 |       |       |       |      |     |   |    |      | 46.60 |     |     |       |      |     |     |      | 100   | 130          |
| S9     | 21   | 13       | Cal        | 0.77   |       |       | 0.44  | 0.95 | 0.62  | 53.23 |       |       |      |     |   |    |      |       |     |     |       |      |     |     |      | 56    | 69           |
| S9     | 21   | 14       | Qz         | 100.00 |       |       |       |      |       |       |       |       |      |     |   |    |      |       |     |     |       |      |     |     |      | 100   | 144          |
| S9     | 22   | 1        | Cld        | 24.25  |       | 37.16 | 20.61 | 0.76 | 1.91  | 0.31  |       |       |      |     |   |    |      |       |     |     |       |      |     |     |      | 85    | 123          |
| S9     | 22   | 2        | Kfs + Cal  | 58.86  |       | 16.13 |       |      |       | 11.09 | 0.6   | 13.32 |      |     |   |    |      |       |     |     |       |      |     |     |      | 100   | 128          |
| S9     | 22   | 3        | Qz         | 100.00 |       |       |       |      |       |       |       |       |      |     |   |    |      |       |     |     |       |      |     |     |      | 100   | 144          |
| S9     | 22   | 4        | Qz         | 100.00 |       |       |       |      |       |       |       |       |      |     |   |    |      |       |     |     |       |      |     |     |      | 100   | 143          |
| S9     | 22   | 5        | Cal        | 0.50   |       |       | 0.76  | 1.02 | 1.13  | 52.60 |       |       |      |     |   |    |      |       |     |     |       |      |     |     |      | 56    | 68           |
| S9     | 22   | 6        | TiO2       | 0.74   | 95.83 |       | 2.81  |      |       | 0.62  |       |       |      |     |   |    |      |       |     |     |       |      |     |     |      | 100   | 124          |
| S9     | 22   | 7        | Kfs        | 66.26  |       | 17.58 |       |      |       |       | 0.47  | 15.69 |      |     |   |    |      |       |     |     |       |      |     |     |      | 100   | 137          |
| S9     | 22   | 8        | Qz         | 100.00 |       |       |       |      |       |       |       |       |      |     |   |    |      |       |     |     |       |      |     |     |      | 100   | 141          |
| S9     | 22   | 9        | Kfs        | 66.83  |       | 17.48 |       |      |       |       |       | 15.69 |      |     |   |    |      |       |     |     |       |      |     |     |      | 100   | 138          |
| S9     | 22   | 10       | Qz         | 100.00 |       |       |       |      |       |       |       |       |      |     |   |    |      |       |     |     |       |      |     |     |      | 100   | 144          |
| S9     | 22   | 11       | Cld        | 28.37  |       | 43.87 | 24.18 | 0.91 | 2.14  | 0.54  |       |       |      |     |   |    |      |       |     |     |       |      |     |     |      | 100   | 124          |
| S9     | 22   | 12       | Cal        | 0.62   |       |       | 0.90  | 0.97 | 1.62  | 51.89 |       |       |      |     |   |    |      |       |     |     |       |      |     |     |      | 56    | 68           |
| S9     | 22   | 13       | Ab         | 68.85  |       | 19.01 |       |      |       | 0.44  | 11.70 |       |      |     |   |    |      |       |     |     |       |      |     |     |      | 100   | 141          |
| S9     | 23   | 1        | Ab +       | 66.05  |       | 18.01 | 1.45  |      | 0.51  | 1.75  | 11.00 |       | 1.24 |     |   |    |      |       |     |     |       |      |     |     |      | 100   | 139          |
| S9     | 23   | 2        | Cpx        | 50.46  | 2.01  | 4.61  | 12.48 |      | 14.81 | 15.29 | 0.34  |       |      |     |   |    |      |       |     |     |       |      |     |     |      | 100   | 138          |

Table A2.1: EDS analyses of sample S9.

| Sample | Site | Position | Mineral | SiO2   | TiO2  | Al2O3 | FeO   | MnO  | MgO   | CaO   | Na2O  | K2O   | P2O5 | SO3 | F | Cl   | V2O5 | Cr2O3 | NiO  | ZnO | As2O3 | ZrO2 | BaO | WO3 | PtO2 | Total | Actual Total |
|--------|------|----------|---------|--------|-------|-------|-------|------|-------|-------|-------|-------|------|-----|---|------|------|-------|------|-----|-------|------|-----|-----|------|-------|--------------|
| S9     | 23   | 3        | Ab      | 64.93  |       | 21.60 | 1.00  |      |       | 1.53  | 9.15  | 1.78  |      |     |   |      |      |       |      |     |       |      |     |     |      | 100   | 140          |
| S9     | 23   | 4        | Ab      | 66.91  |       | 20.48 |       |      |       | 2.01  | 10.60 |       |      |     |   |      |      |       |      |     |       |      |     |     |      | 100   | 143          |
| S9     | 23   | 5        | Ab      | 67.19  |       | 20.09 |       |      |       | 1.56  | 10.80 | 0.37  |      |     |   |      |      |       |      |     |       |      |     |     |      | 100   | 140          |
| S9     | 23   | 6        | Kfs     | 66.11  |       | 17.95 |       |      |       |       | 0.56  | 15.38 |      |     |   |      |      |       |      |     |       |      |     |     |      | 100   | 138          |
| S9     | 23   | 7        | Cpx     | 52.08  | 1.37  | 3.82  | 10.56 | 0.28 | 17.12 | 14.44 | 0.33  |       |      |     |   |      |      |       |      |     |       |      |     |     |      | 100   | 139          |
| S9     | 23   | 8        | Ttn     | 35.31  | 29.40 | 4.49  | 2.66  |      | 0.35  | 27.01 |       |       |      |     |   |      | 0.78 |       |      |     |       |      |     |     |      | 100   | 128          |
| S9     | 23   | 9        | Cpx     | 49.21  | 3.27  | 4.15  | 14.59 | 0.32 | 11.88 | 16.02 | 0.57  |       |      |     |   |      |      |       |      |     |       |      |     |     |      | 100   | 136          |
| S9     | 24   | 1        | Qz      | 100.00 |       |       |       |      |       |       |       |       |      |     |   |      |      |       |      |     |       |      |     |     |      | 100   | 141          |
| S9     | 24   | 2        | Kfs     | 66.34  |       | 17.71 |       |      |       |       |       | 15.95 |      |     |   |      |      |       |      |     |       |      |     |     |      | 100   | 137          |
| S9     | 24   | 3        | Mix     | 28.99  | 22.85 | 5.15  | 21.95 |      | 2.14  | 18.94 |       |       |      |     |   |      |      |       |      |     |       |      |     |     |      | 100   | 119          |
| S9     | 24   | 4        | Ab      | 68.13  |       | 19.53 | 0.25  |      |       | 0.72  | 11.06 | 0.31  |      |     |   |      |      |       |      |     |       |      |     |     |      | 100   | 138          |
| S9     | 24   | 5        | Act     | 51.17  | 0.65  | 3.17  | 12.31 | 0.33 | 17.87 | 11.12 | 0.39  |       |      |     |   |      |      |       |      |     |       |      |     |     |      | 97    | 135          |
| S9     | 24   | 6        | Qz+     | 82.57  |       | 11.92 | 0.85  |      | 0.92  |       |       | 3.74  |      |     |   |      |      |       |      |     |       |      |     |     |      | 100   | 141          |
| S9     | 24   | 7        | Cal     |        |       |       |       |      | 1.11  | 54.89 |       |       |      |     |   |      |      |       |      |     |       |      |     |     |      | 56    | 68           |
| S9     | 24   | 8        | Qz      | 100.00 |       |       |       |      |       |       |       |       |      |     |   |      |      |       |      |     |       |      |     |     |      | 100   | 143          |
| S9     | 24   | 9        | Cal     |        |       |       |       |      | 0.43  | 55.57 |       |       |      |     |   |      |      |       |      |     |       |      |     |     |      | 56    | 70           |
| S9     | 24   | 10       | Cal     |        |       |       |       |      | 1.36  | 54.64 |       |       |      |     |   |      |      |       |      |     |       |      |     |     |      | 56    | 68           |
| S9     | 24   | 11       | Qz +    | 92.42  |       | 1.04  | 1.01  |      | 2.61  | 2.92  |       |       |      |     |   |      |      |       |      |     |       |      |     |     |      | 100   | 142          |
| S9     | 24   | 12       | Qz      | 100.00 |       |       |       |      |       |       |       |       |      |     |   |      |      |       |      |     |       |      |     |     |      | 100   | 145          |
| S9     | 24   | 13       | Kfs     | 66.49  |       | 17.80 |       |      |       |       | 2.15  | 13.56 |      |     |   |      |      |       |      |     |       |      |     |     |      | 100   | 141          |
| S9     | 24   | 14       | Cal     |        |       |       | 0.38  | 0.71 | 0.71  | 54.20 |       |       |      |     |   |      |      |       |      |     |       |      |     |     |      | 56    | 66           |
| S9     | 25   | 1        | Qz      | 100.00 |       |       |       |      |       |       |       |       |      |     |   |      |      |       |      |     |       |      |     |     |      | 100   | 145          |
| S9     | 25   | 2        | Cal     |        |       |       |       |      | 0.42  | 55.58 |       |       |      |     |   |      |      |       |      |     |       |      |     |     |      | 56    | 66           |
| S9     | 25   | 3        | Ab      | 69.75  |       | 18.62 |       |      |       |       | 11.64 |       |      |     |   |      |      |       |      |     |       |      |     |     |      | 100   | 134          |
| S9     | 25   | 4        | Cal     |        |       |       |       |      | 1.47  | 54.53 |       |       |      |     |   |      |      |       |      |     |       |      |     |     |      | 56    | 64           |
| S9     | 25   | 5        | Spl     |        |       | 51.34 | 12.49 |      | 19.41 |       |       |       |      |     |   |      |      | 16.46 | 0.30 |     |       |      |     |     |      | 100   | 135          |
| S9     | 25   | 6        | Cal     |        |       |       | 0.40  | 0.65 | 0.54  | 54.42 |       |       |      |     |   |      |      |       |      |     |       |      |     |     |      | 56    | 69           |
| S9     | 26   | 1        | Ttn     | 34.16  | 33.96 | 2.65  | 1.52  |      |       | 27.71 |       |       |      |     |   |      |      |       |      |     |       |      |     |     |      | 100   | 130          |
| S9     | 26   | 2        | Chl     | 31.12  |       | 15.59 | 20.13 | 0.22 | 17.58 | 0.37  |       |       |      |     |   |      |      |       |      |     |       |      |     |     |      | 85    | 121          |
| S9     | 26   | 3        | Cpx     | 49.95  | 2.64  | 3.99  | 11.09 | 0.30 | 11.48 | 19.89 | 0.67  |       |      |     |   |      |      |       |      |     |       |      |     |     |      | 100   | 135          |
| S9     | 26   | 4        | Gln     | 57.82  |       | 18.63 | 6.84  |      | 8.12  | 1.08  | 6.76  | 0.75  |      |     |   |      |      |       |      |     |       |      |     |     |      | 100   | 129          |
| S9     | 26   | 5        | Ttn     | 34.85  | 32.04 | 3.75  | 1.99  |      | 0.74  | 26.63 |       |       |      |     |   |      |      |       |      |     |       |      |     |     |      | 100   | 128          |
| S9     | 26   | 6        | Cal     |        |       |       | 0.36  | 0.85 | 0.66  | 54.13 |       |       |      |     |   |      |      |       |      |     |       |      |     |     |      | 56    | 68           |
| S9     | 26   | 7        | Opx     | 48.79  |       | 1.17  | 8.59  |      | 40.18 | 0.23  |       |       |      |     |   | 0.46 |      | 0.58  |      |     |       |      |     |     |      | 100   | 109          |
| S9     | 26   | 8        | Cal+    | 5.42   |       | 2.81  | 0.74  | 0.26 | 0.73  | 45.15 |       | 0.89  |      |     |   |      |      |       |      |     |       |      |     |     |      | 56    | 74           |
| S9     | 26   | 9        | Ab +    | 67.01  |       | 18.71 | 1.46  |      | 1.56  | 0.56  | 10.70 |       |      |     |   |      |      |       |      |     |       |      |     |     |      | 100   | 138          |
| S9     | 26   | 10       | Ilm +   | 8.31   | 43.30 | 3.37  | 42.85 | 0.36 | 0.92  | 0.68  |       | 0.21  |      |     |   |      |      |       |      |     |       |      |     |     |      | 100   | 112          |
| S9     | 26   | 11       | Feld    | 65.75  |       | 21.12 | 0.77  |      |       | 3.11  | 8.88  | 0.36  |      |     |   |      |      |       |      |     |       |      |     |     |      | 100   | 135          |

Table A2.1: EDS analyses of sample S9.

| Sample | Site | Position | Mineral    | SiO2   | TiO2  | Al2O3 | FeO   | MnO  | MgO   | CaO   | Na2O  | K2O  | P2O5 | SO3   | F | Cl   | V2O5 | Cr2O3 | NiO  | ZnO | As2O3 | ZrO2 | BaO | WO3 | PtO2 | Total | Actual Total |
|--------|------|----------|------------|--------|-------|-------|-------|------|-------|-------|-------|------|------|-------|---|------|------|-------|------|-----|-------|------|-----|-----|------|-------|--------------|
| S9     | 26   | 12       | Ab         | 69.46  |       | 18.72 |       |      |       | 0.26  | 11.56 |      |      |       |   |      |      |       |      |     |       |      |     |     |      | 100   | 141          |
| S9     | 26   | 13       | Mix        | 49.95  |       | 9.82  | 8.35  |      | 23.62 | 1.24  | 2.03  |      |      | 3.05  |   | 1.94 |      |       |      |     |       |      |     |     |      | 100   | 63           |
| S9     | 27   | 1        | Qz         | 99.65  |       |       |       |      |       | 0.35  |       |      |      |       |   |      |      |       |      |     |       |      |     |     |      | 100   | 139          |
| S9     | 27   | 2        | Py         | 0.26   |       |       | 28.61 |      |       |       | 1.43  |      |      | 69.70 |   |      |      |       |      |     |       |      |     |     |      | 100   | 254          |
| S9     | 27   | 3        | Feho +     | 14.80  | 1.13  | 9.49  | 72.06 |      | 1.04  | 1.21  |       |      |      |       |   | 0.28 |      |       |      |     |       |      |     |     |      | 100   | 98           |
| S9     | 27   | 4        | Ab +       | 66.47  |       | 19.45 | 1.59  |      | 0.76  | 0.82  | 10.69 | 0.21 |      |       |   |      |      |       |      |     |       |      |     |     |      | 100   | 140          |
| S9     | 27   | 5        | Cal        |        |       |       |       | 1.83 |       | 54.17 |       |      |      |       |   |      |      |       |      |     |       |      |     |     |      | 56    | 66           |
| S9     | 27   | 6        | Qz         | 99.80  |       |       | 0.20  |      |       |       |       |      |      |       |   |      |      |       |      |     |       |      |     |     |      | 100   | 142          |
| S9     | 27   | 7        | Dol        |        |       |       |       |      | 22.48 | 31.52 |       |      |      |       |   |      |      |       |      |     |       |      |     |     |      | 54    | 65           |
| S9     | 27   | 8        | Cal        |        |       |       |       |      |       | 56.00 |       |      |      |       |   |      |      |       |      |     |       |      |     |     |      | 56    | 65           |
| S9     | 27   | 9        | Cal        |        |       |       | 0.39  | 0.67 | 0.71  | 54.24 |       |      |      |       |   |      |      |       |      |     |       |      |     |     |      | 56    | 67           |
| S9     | 27   | 10       | Dol        |        |       |       |       |      | 22.39 | 31.61 |       |      |      |       |   |      |      |       |      |     |       |      |     |     |      | 54    | 67           |
| S9     | 27   | 11       | Py         | 0.31   |       |       | 27.81 |      |       |       | 0.55  |      |      | 70.96 |   |      |      |       | 0.37 |     |       |      |     |     |      | 100   | 263          |
| S9     | 27   | 12       | Ab         | 69.48  |       | 18.64 |       |      |       | 0.31  | 11.41 | 0.16 |      |       |   |      |      |       |      |     |       |      |     |     |      | 100   | 137          |
| S9     | 27   | 13       | Chl        | 29.62  |       | 17.98 | 21.34 | 0.22 | 15.32 | 0.53  |       |      |      |       |   |      |      |       |      |     |       |      |     |     |      | 85    | 114          |
| S9     | 28   | 1        | Dol        |        |       |       |       |      | 22.77 | 31.23 |       |      |      |       |   |      |      |       |      |     |       |      |     |     |      | 54    | 67           |
| S9     | 28   | 2        | Cal        |        |       |       | 0.62  | 0.74 | 0.45  | 54.19 |       |      |      |       |   |      |      |       |      |     |       |      |     |     |      | 56    | 66           |
| S9     | 28   | 3        | Qz+        | 75.24  | 0.31  | 14.16 | 1.10  |      |       | 1.68  | 7.33  | 0.17 |      |       |   |      |      |       |      |     |       |      |     |     |      | 100   | 138          |
| S9     | 28   | 4        | Ttn        | 36.26  | 29.26 | 4.22  | 3.27  |      | 0.32  | 26.67 |       |      |      |       |   |      |      |       |      |     |       |      |     |     |      | 100   | 128          |
| S9     | 28   | 5        | Mix        | 45.64  | 6.07  | 4.19  | 24.80 | 0.61 | 3.25  | 15.44 |       |      |      |       |   |      |      |       |      |     |       |      |     |     |      | 100   | 130          |
| S9     | 28   | 6        | Plag +     | 56.90  |       | 25.56 | 2.09  |      | 0.76  | 8.90  | 5.79  |      |      |       |   |      |      |       |      |     |       |      |     |     |      | 100   | 135          |
| S9     | 28   | 7        | Cpx        | 49.31  | 2.76  | 3.22  | 18.00 | 0.34 | 9.29  | 16.73 | 0.37  |      |      |       |   |      |      |       |      |     |       |      |     |     |      | 100   | 134          |
| S9     | 28   | 8        | Feho +     | 10.00  | 1.28  | 2.72  | 81.59 |      | 3.35  | 1.06  |       |      |      |       |   |      |      |       |      |     |       |      |     |     |      | 100   | 113          |
| S9     | 29   | 1        | Feho +     | 17.80  |       | 0.92  | 77.70 |      |       | 2.79  |       |      |      |       |   |      | 0.79 |       |      |     |       |      |     |     |      | 100   | 97           |
| S9     | 29   | 2        | Chl        | 27.73  |       | 18.15 | 21.88 | 0.31 | 16.94 |       |       |      |      |       |   |      |      |       |      |     |       |      |     |     |      | 85    | 114          |
| S9     | 29   | 3        | Py         | 0.47   |       |       | 33.17 | 0.24 |       | 0.21  |       |      |      | 65.90 |   |      |      |       |      |     |       |      |     |     |      | 100   | 235          |
| S9     | 29   | 4        | Feho +     | 20.61  |       | 0.92  | 74.56 |      |       | 3.00  |       |      |      |       |   |      | 0.92 |       |      |     |       |      |     |     |      | 100   | 97           |
| S9     | 29   | 5        | Chl        | 26.86  |       | 17.54 | 23.04 | 0.27 | 16.72 | 0.26  |       |      |      |       |   |      | 0.31 |       |      |     |       |      |     |     |      | 85    | 121          |
| S9     | 29   | 6        | Cal + ?Chl | 1.66   |       | 0.78  | 0.52  | 0.51 | 0.65  | 51.69 |       | 0.19 |      |       |   |      |      |       |      |     |       |      |     |     |      | 56    | 67           |
| S9     | 29   | 7        | Qz         | 100.00 |       |       |       |      |       |       |       |      |      |       |   |      |      |       |      |     |       |      |     |     |      | 100   | 139          |
| S9     | 30   | 1        | Qz         | 99.72  |       |       | 0.28  |      |       |       |       |      |      |       |   |      |      |       |      |     |       |      |     |     |      | 100   | 141          |
| S9     | 30   | 2        | Ab + Chl   | 60.56  |       | 18.10 | 9.53  |      | 1.72  | 0.48  | 9.36  | 0.26 |      |       |   |      |      |       |      |     |       |      |     |     |      | 100   | 136          |
| S9     | 30   | 3        | Feho +     | 25.05  | 2.13  | 1.53  | 70.98 |      |       | 0.31  |       |      |      |       |   |      |      |       |      |     |       |      |     |     |      | 100   | 113          |
| S9     | 30   | 4        | Amph (Act) | 49.57  | 1.40  | 3.15  | 14.45 | 0.41 | 14.19 | 13.52 | 0.31  |      |      |       |   |      |      |       |      |     |       |      |     |     |      | 97    | 137          |
| S9     | 31   | 1        | Cal        |        |       |       |       |      | 0.69  | 55.31 |       |      |      |       |   |      |      |       |      |     |       |      |     |     |      | 56    | 65           |
| S9     | 31   | 2        | Chr        |        |       | 8.58  | 23.68 |      | 9.89  |       |       |      |      |       |   |      |      | 57.85 |      |     |       |      |     |     |      | 100   | 125          |
| S9     | 31   | 3        | Cal        |        |       |       |       |      | 0.64  | 55.36 |       |      |      |       |   |      |      |       |      |     |       |      |     |     |      | 56    | 66           |
| S9     | 31   | 4        | Ab         | 68.17  |       | 19.15 | 0.43  |      |       | 0.36  | 11.32 | 0.56 |      |       |   |      |      |       |      |     |       |      |     |     |      | 100   | 139          |



Table A2.1: EDS analyses of sample S9.

| Sample | Site | Position | Mineral     | SiO2   | TiO2  | Al2O3 | FeO   | MnO  | MgO   | CaO   | Na2O  | K2O  | P2O5 | SO3 | F | Cl | V2O5 | Cr2O3 | NiO | ZnO | As2O3 | ZrO2 | BaO | WO3 | PtO2 | Total | Actual Total |
|--------|------|----------|-------------|--------|-------|-------|-------|------|-------|-------|-------|------|------|-----|---|----|------|-------|-----|-----|-------|------|-----|-----|------|-------|--------------|
| S9     | 31   | 5        | Ttn         | 33.74  | 36.00 | 2.54  | 0.28  |      |       | 27.45 |       |      |      |     |   |    |      |       |     |     |       |      |     |     |      | 100   | 130          |
| S9     | 31   | 6        | Qz          | 100.00 |       |       |       |      |       |       |       |      |      |     |   |    |      |       |     |     |       |      |     |     |      | 100   | 146          |
| S9     | 31   | 7        | Chl         | 27.02  |       | 17.79 | 27.44 | 0.66 | 12.09 |       |       |      |      |     |   |    |      |       |     |     |       |      |     |     |      | 85    | 116          |
| S9     | 31   | 8        | Ab          | 68.83  |       | 19.09 |       |      |       | 0.48  | 11.60 |      |      |     |   |    |      |       |     |     |       |      |     |     |      | 100   | 145          |
| S9     | 31   | 9        | Chl         | 27.14  |       | 21.08 | 20.52 |      | 16.25 |       |       |      |      |     |   |    |      |       |     |     |       |      |     |     |      | 85    | 118          |
| S9     | 31   | 10       | Cal         | 0.41   |       |       | 0.33  | 0.30 | 0.40  | 54.55 |       |      |      |     |   |    |      |       |     |     |       |      |     |     |      | 56    | 66           |
| S9     | 31   | 11       | Qz          | 92.46  |       | 5.36  | 0.28  |      | 0.33  |       |       | 1.57 |      |     |   |    |      |       |     |     |       |      |     |     |      | 100   | 140          |
| S9     | 32   | 1        | Olig + Chl  | 59.20  |       | 19.62 | 5.81  |      | 4.10  | 4.38  | 6.89  |      |      |     |   |    |      |       |     |     |       |      |     |     |      | 100   | 134          |
| S9     | 32   | 2        | Cpx         | 53.82  | 0.69  | 3.40  | 6.44  |      | 17.55 | 17.64 |       |      |      |     |   |    |      | 0.46  |     |     |       |      |     |     |      | 100   | 138          |
| S9     | 32   | 3        | Cpx         | 49.57  | 1.84  | 8.01  | 8.54  |      | 14.55 | 17.07 | 0.42  |      |      |     |   |    |      |       |     |     |       |      |     |     |      | 100   | 137          |
| S9     | 32   | 4        | Gln         | 59.97  |       | 17.50 | 6.37  |      | 4.75  | 3.59  | 7.83  |      |      |     |   |    |      |       |     |     |       |      |     |     |      | 100   | 133          |
| S9     | 33   | 1        | Cal         | 0.71   |       |       | 0.45  | 0.48 | 1.36  | 53.00 |       |      |      |     |   |    |      |       |     |     |       |      |     |     |      | 56    | 67           |
| S9     | 33   | 2        | Dol         |        |       |       |       |      | 23.05 | 30.95 |       |      |      |     |   |    |      |       |     |     |       |      |     |     |      | 54    | 66           |
| S9     | 33   | 3        | Mix         | 41.63  | 3.38  | 21.07 | 15.13 | 0.31 | 10.57 |       | 0.34  | 7.57 |      |     |   |    |      |       |     |     |       |      |     |     |      | 100   | 130          |
| S9     | 33   | 4        | Qz          | 100.00 |       |       |       |      |       |       |       |      |      |     |   |    |      |       |     |     |       |      |     |     |      | 100   | 143          |
| S9     | 33   | 5        | Cal         | 1.39   |       | 0.40  | 0.67  | 0.71 | 0.81  | 52.02 |       |      |      |     |   |    |      |       |     |     |       |      |     |     |      | 56    | 72           |
| S9     | 33   | 6        | Qz          | 100.00 |       |       |       |      |       |       |       |      |      |     |   |    |      |       |     |     |       |      |     |     |      | 100   | 148          |
| S9     | 33   | 7        | Cal         |        |       |       |       | 0.74 | 0.81  | 54.45 |       |      |      |     |   |    |      |       |     |     |       |      |     |     |      | 56    | 64           |
| S9     | 33   | 8        | Qz+         | 83.15  |       | 5.14  | 0.86  |      | 0.68  | 8.56  |       | 1.61 |      |     |   |    |      |       |     |     |       |      |     |     |      | 100   | 119          |
| S9     | 33   | 9        | Cal         |        |       |       |       | 0.63 |       | 55.37 |       |      |      |     |   |    |      |       |     |     |       |      |     |     |      | 56    | 71           |
| S9     | 33   | 10       | Qz          | 100.00 |       |       |       |      |       |       |       |      |      |     |   |    |      |       |     |     |       |      |     |     |      | 100   | 151          |
| S9     | 33   | 11       | Qz +        | 97.31  |       | 1.53  | 0.31  |      | 0.29  |       |       | 0.56 |      |     |   |    |      |       |     |     |       |      |     |     |      | 100   | 137          |
| S9     | 33   | 12       | Cal         |        |       |       |       |      | 0.52  | 55.48 |       |      |      |     |   |    |      |       |     |     |       |      |     |     |      | 56    | 66           |
| S9     | 33   | 13       | Mix         | 42.81  |       | 14.87 | 14.73 |      | 26.85 | 0.74  |       |      |      |     |   |    |      |       |     |     |       |      |     |     |      | 100   | 122          |
| S9     | 33   | 14       | Qz          | 100.00 |       |       |       |      |       |       |       |      |      |     |   |    |      |       |     |     |       |      |     |     |      | 100   | 148          |
| S9     | 34   | 1        | Cal         |        |       |       |       | 0.78 | 0.32  | 54.91 |       |      |      |     |   |    |      |       |     |     |       |      |     |     |      | 56    | 71           |
| S9     | 34   | 2        | Qz          | 100.00 |       |       |       |      |       |       |       |      |      |     |   |    |      |       |     |     |       |      |     |     |      | 100   | 149          |
| S9     | 34   | 3        | Qz          | 100.00 |       |       |       |      |       |       |       |      |      |     |   |    |      |       |     |     |       |      |     |     |      | 100   | 148          |
| S9     | 34   | 4        | Cal         |        |       |       |       |      | 0.29  | 55.71 |       |      |      |     |   |    |      |       |     |     |       |      |     |     |      | 56    | 70           |
| S9     | 34   | 5        | Ttn         | 35.82  | 29.42 | 4.80  | 2.33  |      |       | 27.64 |       |      |      |     |   |    |      |       |     |     |       |      |     |     |      | 100   | 129          |
| S9     | 34   | 6        | Ab          | 69.12  |       | 18.64 | 0.39  |      |       | 0.27  | 11.58 |      |      |     |   |    |      |       |     |     |       |      |     |     |      | 100   | 143          |
| S9     | 34   | 7        | Qz          | 98.82  |       | 1.01  |       |      |       |       |       | 0.17 |      |     |   |    |      |       |     |     |       |      |     |     |      | 100   | 146          |
| S9     | 34   | 8        | Cal+        | 11.32  |       | 2.51  | 0.56  |      | 1.14  | 39.92 |       | 0.56 |      |     |   |    |      |       |     |     |       |      |     |     |      | 56    | 82           |
| S9     | 34   | 9        | Cal + Chl + | 28.10  |       | 11.33 | 9.19  |      | 6.75  | 41.49 | 0.60  | 2.54 |      |     |   |    |      |       |     |     |       |      |     |     |      | 100   | 103          |
| S9     | 34   | 10       | Cal         | 1.74   |       |       |       |      | 0.46  | 53.68 |       | 0.12 |      |     |   |    |      |       |     |     |       |      |     |     |      | 56    | 75           |
| S9     | 35   | 1        | Spl         |        | 0.35  | 36.46 | 18.43 |      | 16.35 |       |       |      |      |     |   |    |      | 28.40 |     |     |       |      |     |     |      | 100   | 128          |
| S9     | 35   | 2        | "Chr"       | 0.55   | 0.40  | 4.97  | 61.41 | 1.92 | 4.04  |       |       |      |      |     |   |    |      | 26.69 |     |     |       |      |     |     |      | 100   | 119          |
| S9     | 35   | 3        | Mix ?       | 49.82  | 0.60  | 11.18 | 5.86  |      | 3.86  | 25.61 |       | 3.07 |      |     |   |    |      |       |     |     |       |      |     |     |      | 100   | 104          |

Table A2.1: EDS analyses of sample S9.

| Sample | Site | Position | Mineral | SiO2   | TiO2  | Al2O3 | FeO   | MnO  | MgO   | CaO   | Na2O  | K2O   | P2O5  | SO3   | F    | Cl | V2O5 | Cr2O3 | NiO  | ZnO | As2O3 | ZrO2 | BaO  | WO3 | PtO2 | Total | Actual Total |
|--------|------|----------|---------|--------|-------|-------|-------|------|-------|-------|-------|-------|-------|-------|------|----|------|-------|------|-----|-------|------|------|-----|------|-------|--------------|
| S9     | 35   | 4        | Qz +    | 96.55  |       | 1.58  | 1.38  |      | 0.49  |       |       |       |       |       |      |    |      |       |      |     |       |      |      |     |      | 100   | 139          |
| S9     | 35   | 5        | Py      | 0.17   |       |       | 28.85 |      |       | 0.38  | 0.28  |       |       | 70.32 |      |    |      |       |      |     |       |      |      |     |      | 100   | 264          |
| S9     | 35   | 6        | Cal     |        |       |       |       |      |       | 56.00 |       |       |       |       |      |    |      |       |      |     |       |      |      |     |      | 56    | 67           |
| S9     | 36   | 1        | Chr     |        |       | 25.10 | 18.83 |      | 14.00 |       |       |       |       |       |      |    |      | 42.07 |      |     |       |      |      |     |      | 100   | 129          |
| S9     | 36   | 2        | Cal     |        |       |       | 0.36  |      | 0.98  | 54.66 |       |       |       |       |      |    |      |       |      |     |       |      |      |     |      | 56    | 64           |
| S9     | 36   | 3        | Qz+     | 78.97  |       | 12.04 | 0.24  |      | 0.30  |       | 8.45  |       |       |       |      |    |      |       |      |     |       |      |      |     |      | 100   | 143          |
| S9     | 36   | 4        | "Opx"   | 46.51  |       | 2.44  | 6.55  |      | 41.14 | 0.73  |       |       |       |       |      |    |      | 0.81  | 1.81 |     |       |      |      |     |      | 100   | 119          |
| S9     | 36   | 5        | Opx     | 55.63  |       | 4.08  | 6.10  |      | 32.75 | 0.60  |       |       |       |       |      |    |      | 0.83  |      |     |       |      |      |     |      | 100   | 138          |
| S9     | 36   | 6        | Cal     |        |       |       |       |      |       | 56.00 |       |       |       |       |      |    |      |       |      |     |       |      |      |     |      | 56    | 67           |
| S9     | 36   | 7        | Spl     |        |       | 31.14 | 18.93 |      | 13.97 |       |       |       |       |       |      |    |      | 35.96 |      |     |       |      |      |     |      | 100   | 130          |
| S9     | 36   | 8        | Ab      | 69.27  |       | 18.77 |       |      |       | 0.21  | 11.76 |       |       |       |      |    |      |       |      |     |       |      |      |     |      | 100   | 136          |
| S9     | 36   | 9        | Ms      | 48.66  |       | 31.86 | 2.16  |      | 1.18  |       | 0.29  | 10.85 |       |       |      |    |      |       |      |     |       |      |      |     |      | 95    | 124          |
| S9     | 36   | 10       | Cal     |        |       |       |       |      |       | 56.00 |       |       |       |       |      |    |      |       |      |     |       |      |      |     |      | 56    | 65           |
| S9     | 36   | 11       | Kfs     | 66.41  |       | 17.86 |       |      |       |       | 0.65  | 15.08 |       |       |      |    |      |       |      |     |       |      |      |     |      | 100   | 131          |
| S9     | 36   | 12       | Ab      | 67.99  |       | 19.70 |       |      |       | 0.89  | 11.27 | 0.15  |       |       |      |    |      |       |      |     |       |      |      |     |      | 100   | 134          |
| S9     | 36   | 13       | Ms      | 49.66  |       | 27.92 | 4.69  |      | 2.46  |       |       | 10.27 |       |       |      |    |      |       |      |     |       |      |      |     |      | 95    | 123          |
| S9     | 37   | 1        | Qz      | 100.00 |       |       |       |      |       |       |       |       |       |       |      |    |      |       |      |     |       |      |      |     |      | 100   | 138          |
| S9     | 37   | 2        | Cal     |        |       |       |       | 0.58 |       | 55.42 |       |       |       |       |      |    |      |       |      |     |       |      |      |     |      | 56    | 65           |
| S9     | 37   | 3        | Chr +   | 9.49   |       | 3.96  | 54.97 | 0.57 | 10.89 |       |       |       |       |       |      |    |      | 20.13 |      |     |       |      |      |     |      | 100   | 126          |
| S9     | 37   | 4        | "Opx"   | 49.87  |       | 0.76  | 4.22  |      | 44.27 | 0.26  |       |       |       |       |      |    |      | 0.28  | 0.33 |     |       |      |      |     |      | 100   | 123          |
| S9     | 37   | 5        | Cpx     | 51.12  | 1.53  | 2.04  | 18.47 | 0.52 | 11.17 | 15.14 |       |       |       |       |      |    |      |       |      |     |       |      |      |     |      | 100   | 137          |
| S9     | 37   | 6        | Ab +    | 59.55  |       | 20.10 | 7.15  |      | 2.64  | 2.38  | 8.18  |       |       |       |      |    |      |       |      |     |       |      |      |     |      | 100   | 138          |
| S9     | 37   | 7        | Qz      | 100.00 |       |       |       |      |       |       |       |       |       |       |      |    |      |       |      |     |       |      |      |     |      | 100   | 138          |
| S9     | 37   | 8        | Ep +    | 42.32  |       | 25.08 | 7.46  |      |       | 21.13 |       | 1.02  |       |       |      |    |      |       |      |     |       |      |      |     |      | 97    | 123          |
| S9     | 37   | 9        | Cal+    | 13.90  |       | 0.36  |       |      | 0.41  | 41.33 |       |       |       |       |      |    |      |       |      |     |       |      |      |     |      | 56    | 80           |
| S9     | 37   | 10       | Chl     | 33.21  |       | 11.94 | 23.41 | 0.39 | 15.40 | 0.65  |       |       |       |       |      |    |      |       |      |     |       |      |      |     |      | 85    | 118          |
| S9     | 37   | 11       | Ab      | 69.12  |       | 18.89 |       |      |       | 0.19  | 11.81 |       |       |       |      |    |      |       |      |     |       |      |      |     |      | 100   | 149          |
| S9     | 37   | 12       | Ap      |        |       |       |       |      |       | 48.20 |       |       | 44.16 |       | 6.07 |    |      |       |      |     |       |      | 1.57 |     |      | 100   | 150          |
| S9     | 37   | 13       | Qz      | 100.00 |       |       |       |      |       |       |       |       |       |       |      |    |      |       |      |     |       |      |      |     |      | 100   | 147          |
| S9     | 37   | 14       | Cal     |        |       |       | 0.36  |      | 0.49  | 55.16 |       |       |       |       |      |    |      |       |      |     |       |      |      |     |      | 56    | 69           |
| S9     | 37   | 15       | Feho +  | 4.74   |       |       | 93.99 |      | 0.60  | 0.67  |       |       |       |       |      |    |      |       |      |     |       |      |      |     |      | 100   | 93           |
| S9     | 38   | 1        | Cal     |        |       |       |       |      | 0.43  | 55.57 |       |       |       |       |      |    |      |       |      |     |       |      |      |     |      | 56    | 67           |
| S9     | 38   | 2        | Cal     |        |       |       |       | 4.27 | 0.43  | 51.31 |       |       |       |       |      |    |      |       |      |     |       |      |      |     |      | 56    | 59           |
| S9     | 38   | 3        | Qz+ Ab  | 76.56  |       | 14.51 |       |      |       | 0.47  | 8.46  |       |       |       |      |    |      |       |      |     |       |      |      |     |      | 100   | 146          |
| S9     | 38   | 4        | Qz      | 100.00 |       |       |       |      |       |       |       |       |       |       |      |    |      |       |      |     |       |      |      |     |      | 100   | 139          |
| S9     | 39   | 1        | Ttn +   | 15.82  | 68.01 | 0.85  | 1.35  |      |       | 13.97 |       |       |       |       |      |    |      |       |      |     |       |      |      |     |      | 100   | 129          |
| S9     | 39   | 2        | Qz      | 99.38  |       | 0.62  |       |      |       |       |       |       |       |       |      |    |      |       |      |     |       |      |      |     |      | 100   | 141          |
| S9     | 39   | 3        | Cal     |        |       |       | 0.69  | 1.38 | 0.36  | 53.56 |       |       |       |       |      |    |      |       |      |     |       |      |      |     |      | 56    | 66           |

Table A2.1: EDS analyses of sample S9.

| Sample | Site | Position | Mineral      | SiO2   | TiO2  | Al2O3 | FeO   | MnO  | MgO   | CaO   | Na2O  | K2O   | P2O5 | SO3   | F | Cl | V2O5 | Cr2O3 | NiO  | ZnO | As2O3 | ZrO2 | BaO | WO3 | PtO2 | Total | Actual Total |
|--------|------|----------|--------------|--------|-------|-------|-------|------|-------|-------|-------|-------|------|-------|---|----|------|-------|------|-----|-------|------|-----|-----|------|-------|--------------|
| S9     | 39   | 4        | Cal          |        |       |       | 0.43  | 0.99 | 0.75  | 53.84 |       |       |      |       |   |    |      |       |      |     |       |      |     |     |      | 56    | 66           |
| S9     | 39   | 5        | Qz           | 99.80  |       |       |       |      |       | 0.20  |       |       |      |       |   |    |      |       |      |     |       |      |     |     |      | 100   | 141          |
| S9     | 39   | 6        | Chl +        | 35.63  |       | 12.89 | 17.61 | 1.73 | 14.81 | 1.66  | 0.51  | 0.17  |      |       |   |    |      |       |      |     |       |      |     |     |      | 85    | 112          |
| S9     | 39   | 7        | Cpx+         | 47.14  | 2.37  | 7.28  | 12.26 | 0.32 | 11.07 | 19.10 | 0.47  |       |      |       |   |    |      |       |      |     |       |      |     |     |      | 100   | 126          |
| S9     | 39   | 8        | Qz           | 100.00 |       |       |       |      |       |       |       |       |      |       |   |    |      |       |      |     |       |      |     |     |      | 100   | 144          |
| S9     | 39   | 9        | Cal          | 0.43   |       |       |       | 0.54 | 0.33  | 54.70 |       |       |      |       |   |    |      |       |      |     |       |      |     |     |      | 56    | 67           |
| S9     | 40   | 1        | Kfs          | 66.29  |       | 17.87 |       |      |       |       | 0.85  | 14.99 |      |       |   |    |      |       |      |     |       |      |     |     |      | 100   | 138          |
| S9     | 40   | 2        | Ab           | 69.29  |       | 18.79 | 0.20  |      |       | 0.28  | 11.44 |       |      |       |   |    |      |       |      |     |       |      |     |     |      | 100   | 139          |
| S9     | 40   | 3        | Qz+          | 74.20  | 0.33  | 14.09 | 3.14  |      | 3.47  |       | 2.33  | 2.44  |      |       |   |    |      |       |      |     |       |      |     |     |      | 100   | 136          |
| S9     | 40   | 4        | Grt (Alm)    | 39.46  |       | 20.85 | 29.00 | 6.76 | 3.24  | 0.69  |       |       |      |       |   |    |      |       |      |     |       |      |     |     |      | 100   | 134          |
| S9     | 40   | 5        | Spl          |        |       | 36.97 | 14.98 |      | 16.60 |       |       |       |      |       |   |    |      | 31.45 |      |     |       |      |     |     |      | 100   | 127          |
| S9     | 40   | 6        | Qz+          | 85.80  |       | 4.83  | 3.64  |      | 4.87  | 0.25  | 0.24  | 0.37  |      |       |   |    |      |       |      |     |       |      |     |     |      | 100   | 124          |
| S9     | 40   | 7        | Cal          | 0.54   |       |       |       | 0.65 | 0.45  | 54.35 |       |       |      |       |   |    |      |       |      |     |       |      |     |     |      | 56    | 68           |
| S9     | 40   | 8        | Spl          | 0.71   |       | 35.51 | 14.14 |      | 17.24 | 0.26  |       |       |      |       |   |    |      | 32.14 |      |     |       |      |     |     |      | 100   | 130          |
| S9     | 40   | 9        | Qz           | 100.00 |       |       |       |      |       |       |       |       |      |       |   |    |      |       |      |     |       |      |     |     |      | 100   | 141          |
| S9     | 40   | 10       | Chl          | 31.74  |       | 19.64 | 19.97 |      | 12.51 | 0.66  | 0.48  |       |      |       |   |    |      |       |      |     |       |      |     |     |      | 85    | 111          |
| S9     | 40   | 11       | Ol           | 41.45  |       |       | 10.05 |      | 48.22 |       |       |       |      |       |   |    |      |       | 0.29 |     |       |      |     |     |      | 100   | 136          |
| S9     | 41   | 1        | Kfs          | 66.30  |       | 17.73 |       |      |       |       |       | 15.97 |      |       |   |    |      |       |      |     |       |      |     |     |      | 100   | 134          |
| S9     | 41   | 2        | Qz           | 100.00 |       |       |       |      |       |       |       |       |      |       |   |    |      |       |      |     |       |      |     |     |      | 100   | 139          |
| S9     | 41   | 3        | Cal          |        |       |       |       | 0.31 |       | 55.69 |       |       |      |       |   |    |      |       |      |     |       |      |     |     |      | 56    | 66           |
| S9     | 41   | 4        | Qz           | 100.00 |       |       |       |      |       |       |       |       |      |       |   |    |      |       |      |     |       |      |     |     |      | 100   | 141          |
| S9     | 41   | 5        | Grt (Alm)    | 40.25  |       | 21.15 | 30.99 | 1.33 | 4.13  | 2.15  |       |       |      |       |   |    |      |       |      |     |       |      |     |     |      | 100   | 133          |
| S9     | 41   | 6        | Cal          | 0.86   |       |       | 0.98  | 1.01 | 1.37  | 51.77 |       |       |      |       |   |    |      |       |      |     |       |      |     |     |      | 56    | 67           |
| S9     | 41   | 7        | Qz           | 100.00 |       |       |       |      |       |       |       |       |      |       |   |    |      |       |      |     |       |      |     |     |      | 100   | 143          |
| S9     | 41   | 8        | Ab           | 67.73  |       | 19.69 |       |      |       | 1.17  | 11.42 |       |      |       |   |    |      |       |      |     |       |      |     |     |      | 100   | 138          |
| S9     | 41   | 9        | Cpx          | 52.08  | 1.13  | 4.96  | 7.42  |      | 14.63 | 19.31 | 0.47  |       |      |       |   |    |      |       |      |     |       |      |     |     |      | 100   | 133          |
| S9     | 41   | 10       | Cal          |        |       |       |       | 0.64 |       | 55.36 |       |       |      |       |   |    |      |       |      |     |       |      |     |     |      | 56    | 64           |
| S9     | 41   | 11       | Qz           | 100.00 |       |       |       |      |       |       |       |       |      |       |   |    |      |       |      |     |       |      |     |     |      | 100   | 142          |
| S9     | 41   | 12       | Cal          |        |       |       | 1.03  |      |       | 54.97 |       |       |      |       |   |    |      |       |      |     |       |      |     |     |      | 56    | 66           |
| S9     | 41   | 13       | Qz           | 100.00 |       |       |       |      |       |       |       |       |      |       |   |    |      |       |      |     |       |      |     |     |      | 100   | 141          |
| S9     | 41   | 14       | Cal+         | 2.07   |       | 0.55  | 4.11  | 2.63 | 0.80  | 45.71 |       | 0.13  |      |       |   |    |      |       |      |     |       |      |     |     |      | 56    | 69           |
| S9     | 42   | 1        | Cal          |        |       |       | 0.82  | 0.60 | 1.23  | 53.35 |       |       |      |       |   |    |      |       |      |     |       |      |     |     |      | 56    | 65           |
| S9     | 42   | 2        | Clay (Ill +) | 68.74  |       | 15.85 | 4.76  |      | 4.21  |       | 0.74  | 5.70  |      |       |   |    |      |       |      |     |       |      |     |     |      | 100   | 136          |
| S9     | 42   | 3        | Clay (Ill +) | 58.15  | 0.41  | 19.81 | 9.46  |      | 4.26  | 0.90  | 0.48  | 6.53  |      |       |   |    |      |       |      |     |       |      |     |     |      | 100   | 121          |
| S9     | 42   | 4        | Qz           | 98.50  |       | 0.94  |       |      |       |       | 0.36  | 0.20  |      |       |   |    |      |       |      |     |       |      |     |     |      | 100   | 140          |
| S9     | 42   | 5        | Qz           | 92.05  |       | 5.29  | 0.33  |      | 0.69  |       |       | 1.65  |      |       |   |    |      |       |      |     |       |      |     |     |      | 100   | 139          |
| S9     | 42   | 6        | Py           | 0.14   |       |       | 26.93 | 0.73 |       |       | 0.20  |       |      | 71.77 |   |    |      |       | 0.23 |     |       |      |     |     |      | 100   | 259          |
| S9     | 42   | 7        | Ilm +        | 1.23   | 34.44 |       | 63.42 |      |       |       |       |       |      |       |   |    | 0.91 |       |      |     |       |      |     |     |      | 100   | 115          |

Table A2.1: EDS analyses of sample S9.

| Sample | Site | Position | Mineral      | SiO2   | TiO2  | Al2O3 | FeO   | MnO   | MgO   | CaO   | Na2O  | K2O   | P2O5 | SO3 | F | Cl   | V2O5 | Cr2O3 | NiO | ZnO  | As2O3 | ZrO2 | BaO  | WO3 | PtO2 | Total | Actual Total |
|--------|------|----------|--------------|--------|-------|-------|-------|-------|-------|-------|-------|-------|------|-----|---|------|------|-------|-----|------|-------|------|------|-----|------|-------|--------------|
| S9     | 42   | 8        | Amph (Act)   | 54.16  | 0.34  | 2.15  | 15.97 | 0.25  | 12.84 | 10.89 | 0.39  |       |      |     |   |      |      |       |     |      |       |      |      |     |      | 97    | 134          |
| S9     | 42   | 9        | Ab           | 67.28  |       | 20.25 |       |       |       | 1.87  | 10.60 |       |      |     |   |      |      |       |     |      |       |      |      |     |      | 100   | 139          |
| S9     | 42   | 10       | Qz           | 100.00 |       |       |       |       |       |       |       |       |      |     |   |      |      |       |     |      |       |      |      |     |      | 100   | 140          |
| S9     | 43   | 1        | Grt (Andr)   | 39.96  |       | 0.90  | 23.65 |       | 4.88  | 30.62 |       |       |      |     |   |      |      |       |     |      |       |      |      |     |      | 100   | 122          |
| S9     | 43   | 2        | "Opx"        | 49.25  |       | 1.89  | 7.49  |       | 40.12 | 0.33  |       |       |      |     |   |      |      | 0.92  |     |      |       |      |      |     |      | 100   | 116          |
| S9     | 43   | 3        | Grt (Andr)   | 38.72  |       | 1.43  | 24.41 |       | 0.63  | 33.91 |       |       |      |     |   |      |      | 0.89  |     |      |       |      |      |     |      | 100   | 128          |
| S9     | 43   | 4        | Qz           | 100.00 |       |       |       |       |       |       |       |       |      |     |   |      |      |       |     |      |       |      |      |     |      | 100   | 145          |
| S9     | 43   | 5        | Cal          |        |       |       | 1.02  |       | 0.42  | 54.56 |       |       |      |     |   |      |      |       |     |      |       |      |      |     |      | 56    | 67           |
| S9     | 43   | 6        | Cal          |        |       |       |       |       |       | 56.00 |       |       |      |     |   |      |      |       |     |      |       |      |      |     |      | 56    | 70           |
| S9     | 43   | 7        | Mix          | 47.72  |       | 17.16 | 10.79 |       | 21.09 | 0.73  | 1.37  | 1.13  |      |     |   |      |      |       |     |      |       |      |      |     |      | 100   | 130          |
| S9     | 43   | 8        | Cal          |        |       |       |       |       | 0.43  | 55.57 |       |       |      |     |   |      |      |       |     |      |       |      |      |     |      | 56    | 70           |
| S9     | 43   | 9        | "Opx"        | 46.14  |       | 2.54  | 6.44  | 0.28  | 42.51 |       |       |       |      |     |   | 0.49 |      | 1.61  |     |      |       |      |      |     |      | 100   | 112          |
| S9     | 44   | 1        | Qz           | 100.00 |       |       |       |       |       |       |       |       |      |     |   |      |      |       |     |      |       |      |      |     |      | 100   | 145          |
| S9     | 44   | 2        | Cpx          | 51.36  | 1.31  | 2.16  | 16.37 | 0.39  | 11.40 | 16.58 | 0.43  |       |      |     |   |      |      |       |     |      |       |      |      |     |      | 100   | 137          |
| S9     | 44   | 3        | Ab           | 67.56  |       | 19.15 | 1.27  |       | 0.29  | 0.55  | 11.18 |       |      |     |   |      |      |       |     |      |       |      |      |     |      | 100   | 140          |
| S9     | 44   | 4        | Grt (Alm-Sp) | 39.74  |       | 20.64 | 16.95 | 14.92 | 1.94  | 5.82  |       |       |      |     |   |      |      |       |     |      |       |      |      |     |      | 100   | 142          |
| S9     | 44   | 5        | Qz           | 100.00 |       |       |       |       |       |       |       |       |      |     |   |      |      |       |     |      |       |      |      |     |      | 100   | 151          |
| S9     | 44   | 6        | Qz           | 100.00 |       |       |       |       |       |       |       |       |      |     |   |      |      |       |     |      |       |      |      |     |      | 100   | 147          |
| S9     | 44   | 7        | Kfs          | 65.27  |       | 17.93 |       |       |       |       | 0.35  | 15.61 |      |     |   |      |      |       |     |      |       |      | 0.84 |     |      | 100   | 143          |
| S9     | 44   | 8        | Kfs +        | 56.85  |       | 23.89 | 5.72  |       | 3.99  | 0.52  | 0.35  | 8.67  |      |     |   |      |      |       |     |      |       |      |      |     |      | 100   | 132          |
| S9     | 44   | 9        | Ttn +        | 40.96  | 22.92 | 10.02 | 2.47  |       | 1.46  | 19.85 |       | 2.32  |      |     |   |      |      |       |     |      |       |      |      |     |      | 100   | 134          |
| S9     | 44   | 10       | Cal          |        |       |       |       |       |       | 56.00 |       |       |      |     |   |      |      |       |     |      |       |      |      |     |      | 56    | 67           |
| S9     | 44   | 11       | Qz           | 100.00 |       |       |       |       |       |       |       |       |      |     |   |      |      |       |     |      |       |      |      |     |      | 100   | 147          |
| S9     | 44   | 12       | Ab           | 69.56  |       | 18.60 |       |       |       |       | 11.84 |       |      |     |   |      |      |       |     |      |       |      |      |     |      | 100   | 144          |
| S9     | 44   | 13       | Feld         | 63.88  |       | 24.20 | 0.24  |       |       | 0.99  | 8.03  | 2.67  |      |     |   |      |      |       |     |      |       |      |      |     |      | 100   | 113          |
| S9     | 44   | 14       | Ab           | 69.38  |       | 18.85 |       |       |       |       | 11.77 |       |      |     |   |      |      |       |     |      |       |      |      |     |      | 100   | 147          |
| S9     | 44   | 15       | Ab           | 66.15  |       | 21.62 |       |       |       | 1.16  | 9.91  | 1.17  |      |     |   |      |      |       |     |      |       |      |      |     |      | 100   | 126          |
| S9     | 45   | 1        | Grt (Andr)   | 40.58  |       | 3.07  | 20.82 |       | 8.03  | 27.17 |       |       |      |     |   |      |      |       |     | 0.33 |       |      |      |     |      | 100   | 122          |
| S9     | 45   | 2        | "Opx"        | 50.56  |       | 1.26  | 6.44  |       | 41.55 | 0.19  |       |       |      |     |   |      |      |       |     |      |       |      |      |     |      | 100   | 115          |
| S9     | 45   | 3        | Grt          | 38.34  |       | 2.95  | 22.54 |       | 4.58  | 31.23 |       |       |      |     |   |      |      |       |     | 0.36 |       |      |      |     |      | 100   | 121          |
| S9     | 45   | 4        | Cal          |        |       |       |       |       |       | 56.00 |       |       |      |     |   |      |      |       |     |      |       |      |      |     |      | 56    | 65           |
| S9     | 45   | 5        | Grt          | 37.86  | 2.13  | 2.25  | 20.92 |       | 6.97  | 29.56 |       |       |      |     |   |      |      |       |     | 0.31 |       |      |      |     |      | 100   | 119          |
| S9     | 45   | 6        | Grt          | 43.10  |       | 2.96  | 18.32 |       | 12.03 | 23.58 |       |       |      |     |   |      |      |       |     |      |       |      |      |     |      | 100   | 124          |
| S9     | 46   | 1        | Mix          | 39.11  | 13.03 | 8.68  | 2.98  |       | 6.13  | 19.46 | 1.22  | 1.36  | 7.85 |     |   | 0.17 |      |       |     |      |       |      |      |     |      | 100   | 136          |
| S9     | 46   | 2        | Mix          | 62.51  |       | 17.28 | 3.80  |       | 7.89  | 0.44  | 7.34  | 0.22  |      |     |   |      |      |       |     | 0.52 |       |      |      |     |      | 100   | 119          |
| S9     | 46   | 3        | Feld         | 59.83  |       | 25.24 | 0.43  |       | 0.31  | 5.98  | 7.15  | 1.08  |      |     |   |      |      |       |     |      |       |      |      |     |      | 100   | 147          |
| S9     | 46   | 4        | Cpx          | 47.94  | 3.54  | 5.91  | 9.72  |       | 11.15 | 20.70 | 1.05  |       |      |     |   |      |      |       |     |      |       |      |      |     |      | 100   | 136          |
| S9     | 46   | 5        | Cal          | 1.15   |       | 0.49  | 0.74  | 0.26  | 1.50  | 51.55 |       |       |      |     |   |      |      |       |     | 0.32 |       |      |      |     |      | 56    | 68           |



Table A2.1: EDS analyses of sample S9.

| Sample | Site | Position | Mineral                                       | SiO2  | TiO2  | Al2O3 | FeO   | MnO  | MgO  | CaO   | Na2O  | K2O   | P2O5 | SO3   | F | Cl   | V2O5 | Cr2O3 | NiO | ZnO  | As2O3 | ZrO2 | BaO | WO3 | PtO2 | Total | Actual Total |
|--------|------|----------|-----------------------------------------------|-------|-------|-------|-------|------|------|-------|-------|-------|------|-------|---|------|------|-------|-----|------|-------|------|-----|-----|------|-------|--------------|
| S9     | 46   | 6        | Qz                                            | 99.78 |       |       |       |      |      |       |       |       |      |       |   |      |      |       |     | 0.22 |       |      |     |     |      | 100   | 143          |
| S9     | 46   | 7        | TiO2 +                                        | 5.45  | 92.42 | 0.65  | 0.99  |      |      |       |       |       |      |       |   |      |      |       |     | 0.49 |       |      |     |     |      | 100   | 128          |
| S9     | 46   | 8        | Ms                                            | 47.51 | 0.47  | 33.82 | 1.47  |      | 1.32 |       | 1.81  | 8.19  |      |       |   |      |      |       |     | 0.42 |       |      |     |     |      | 95    | 129          |
| S9     | 46   | 9        | Qz                                            | 99.65 |       |       |       |      |      |       |       |       |      |       |   |      |      |       |     | 0.35 |       |      |     |     |      | 100   | 142          |
| S9     | 46   | 10       | Kfs                                           | 66.06 |       | 17.65 |       |      |      |       | 0.30  | 15.64 |      |       |   |      |      |       |     | 0.35 |       |      |     |     |      | 100   | 140          |
| S9     | 46   | 11       | Ab                                            | 69.34 |       | 18.66 |       |      |      |       | 12.01 |       |      |       |   |      |      |       |     |      |       |      |     |     |      | 100   | 140          |
| S9     | 46   | 12       | Cal                                           |       |       |       |       |      |      | 55.76 |       |       |      |       |   |      |      |       |     | 0.24 |       |      |     |     |      | 56    | 67           |
| S9     | 46   | 13       | Qz                                            | 96.21 |       | 1.36  | 0.59  |      | 0.93 | 0.90  |       |       |      |       |   |      |      |       |     |      |       |      |     |     |      | 100   | 139          |
| S9     | 46   | 14       | Ab + Qz                                       | 72.00 |       | 17.16 |       |      |      |       | 10.84 |       |      |       |   |      |      |       |     |      |       |      |     |     |      | 100   | 139          |
| S9     | 46   | 15       | Cal                                           | 0.54  |       |       |       |      | 1.09 | 54.36 |       |       |      |       |   |      |      |       |     |      |       |      |     |     |      | 56    | 66           |
| S9     | 47   | 1        | Py                                            | 0.96  |       |       | 37.95 |      |      | 0.44  | 0.74  |       |      | 58.83 |   |      |      |       |     | 0.45 | 0.62  |      |     |     |      | 100   | 213          |
| S9     | 47   | 2        | Py + Chl                                      | 8.84  |       | 2.64  | 44.59 |      | 4.27 | 0.78  |       |       |      | 38.43 |   |      |      |       |     | 0.45 |       |      |     |     |      | 100   | 152          |
| S9     | 47   | 3        | Qz                                            | 93.28 |       | 3.32  | 1.26  |      | 1.18 |       |       | 0.95  |      |       |   |      |      |       |     |      |       |      |     |     |      | 100   | 139          |
| S9     | 47   | 4        | Py                                            | 0.95  |       |       | 36.58 |      |      | 0.31  |       |       |      | 61.15 |   |      |      |       |     | 0.53 | 0.48  |      |     |     |      | 100   | 221          |
| S9     | 47   | 5        | Qz                                            | 99.08 |       |       | 0.59  |      |      |       |       |       |      |       |   |      |      |       |     | 0.34 |       |      |     |     |      | 100   | 145          |
| S9     | 47   | 6        | Bt + Chl                                      | 35.82 | 2.11  | 16.39 | 14.07 |      | 9.86 |       |       | 6.29  |      |       |   |      |      |       |     | 0.46 |       |      |     |     |      | 85    | 129          |
| S9     | 48   | 1        | Grt (Alm)                                     | 39.74 |       | 21.16 | 31.67 | 1.09 | 4.87 | 0.78  |       |       |      |       |   |      |      |       |     | 0.70 |       |      |     |     |      | 100   | 136          |
| S9     | 48   | 2        | Qz                                            | 99.51 |       |       |       |      |      |       |       |       |      |       |   |      |      |       |     | 0.49 |       |      |     |     |      | 100   | 146          |
| S9     | 48   | 3        | Chr                                           | 1.65  | 1.01  | 4.32  | 47.02 | 1.27 | 1.83 |       |       |       |      |       |   |      | 0.53 | 40.70 |     | 1.67 |       |      |     |     |      | 100   | 122          |
| S9     | 48   | 4        | Ms                                            | 47.38 | 0.44  | 34.07 | 1.11  |      | 0.77 |       | 1.10  | 9.48  |      |       |   |      |      |       |     | 0.66 |       |      |     |     |      | 95    | 134          |
| S9     | 48   | 5        | Ttn                                           | 34.43 | 31.03 | 3.06  | 1.93  |      | 0.78 | 26.29 |       |       |      |       |   |      | 1.10 |       |     | 1.38 |       |      |     |     |      | 100   | 133          |
| S9     | 48   | 6        | Kfs + Chl                                     | 67.49 | 0.33  | 14.51 | 8.07  |      | 2.97 |       |       | 5.28  |      |       |   | 0.69 |      |       |     | 0.67 |       |      |     |     |      | 100   | 121          |
|        |      |          |                                               |       |       |       |       |      |      |       |       |       |      |       |   |      |      |       |     |      |       |      |     |     |      |       |              |
|        |      |          | Notes                                         |       |       |       |       |      |      |       |       |       |      |       |   |      |      |       |     |      |       |      |     |     |      |       |              |
|        |      |          | + = indicates that other minerals are present |       |       |       |       |      |      |       |       |       |      |       |   |      |      |       |     |      |       |      |     |     |      |       |              |
|        |      |          | " " = indicates that mineral is altered       |       |       |       |       |      |      |       |       |       |      |       |   |      |      |       |     |      |       |      |     |     |      |       |              |
|        |      |          | Feho = Fe-oxide/hydroxide                     |       |       |       |       |      |      |       |       |       |      |       |   |      |      |       |     |      |       |      |     |     |      |       |              |
|        |      |          | Feld = Feldspar                               |       |       |       |       |      |      |       |       |       |      |       |   |      |      |       |     |      |       |      |     |     |      |       |              |

## A3: SEM-BSE images and EDS mineral analyses for sample S11

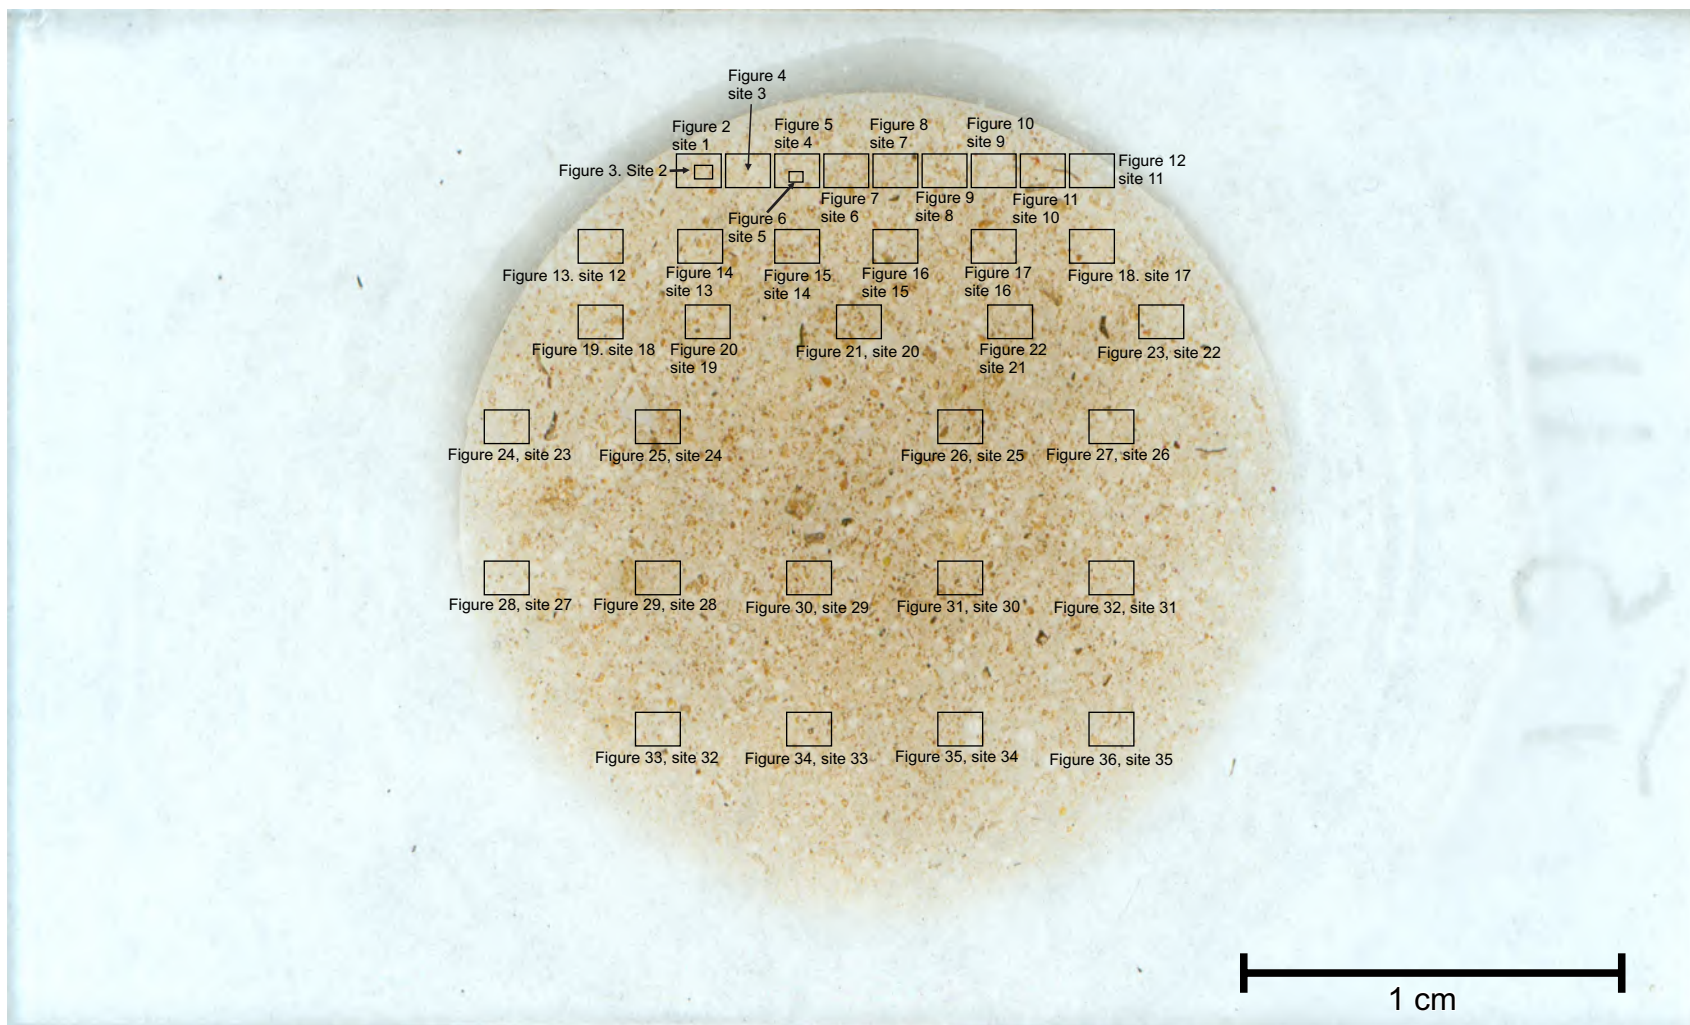

Figure A3.1: Slide S11, Taken from the Lower Louros River from a sandy bank 30 centimetres above normal water level. In flood, river rises 2 metres.

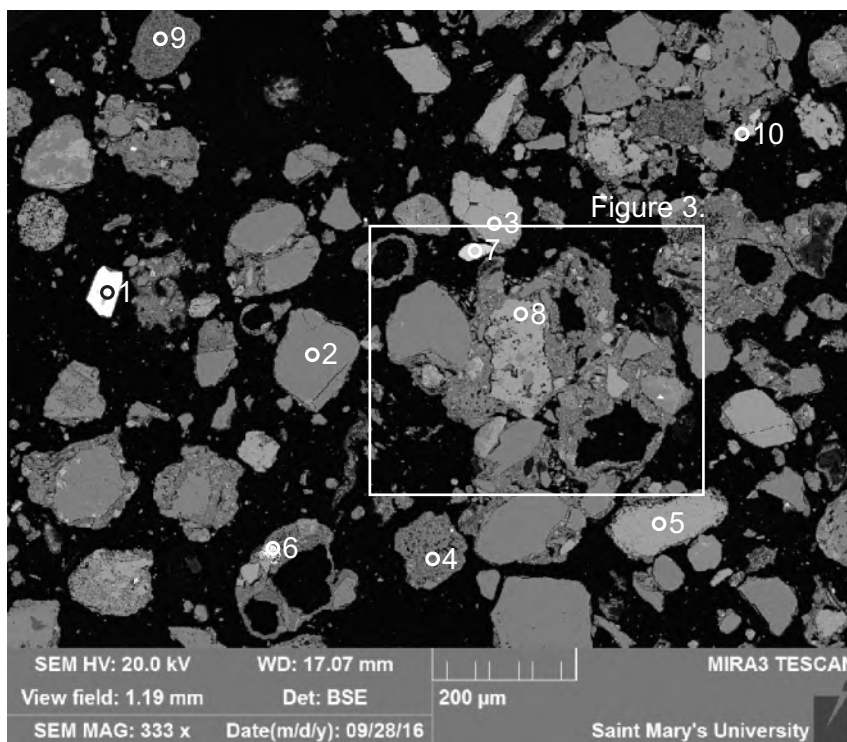

1. Zircon
2. Quartz
3. Calcite
4. Mix
5. Calcite
6. Pyrite
7. Garnet (Almandine)
8. Calcite
9. Quartz
10. Apatite

Figure A3.2: Sample S11 site 1 (SEM). This site includes: Detrital calcite (3,5,8), apatite (10), pyrite (6), zircon (1), quartz (2, 9), and garnet (7).

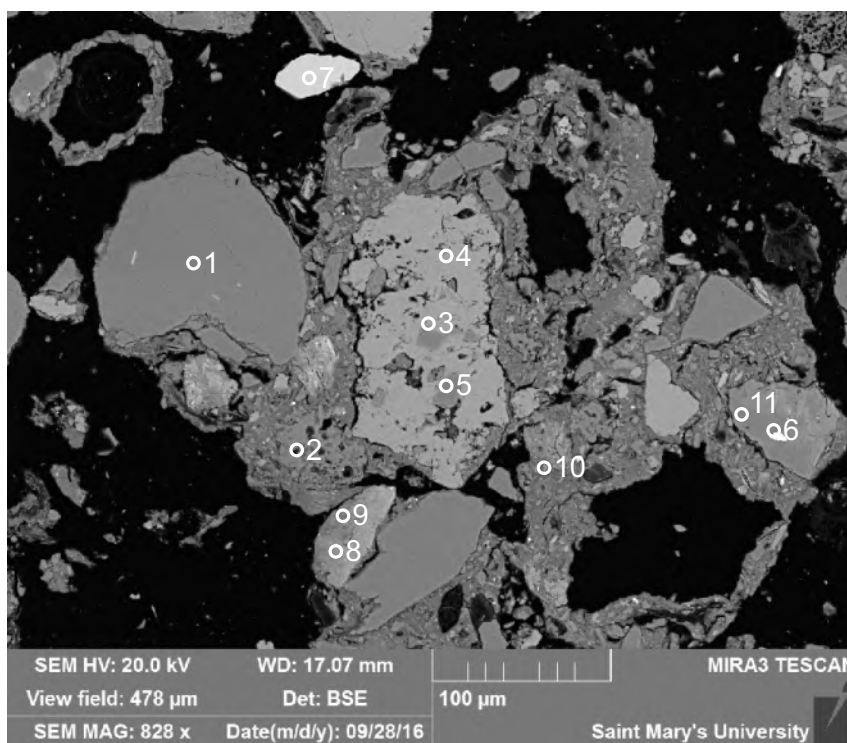

1. Quartz
2. Quartz +
3. Calcite + Quartz
4. Quartz +
5. Quartz +
6. Pyrite +
7. Garnet (Almandine)
8. Mix
9. Quartz +
10. Quartz +
11. Albite

Figure A3.3: Sample S11 site 2 (SEM). This site includes: Detrital quartz (1, 2, 4, 5, 9 and 10), albite (11), calcite (3), garnet (7), and pyrite (6). This is a typical muddy aggregate, common in this sample.



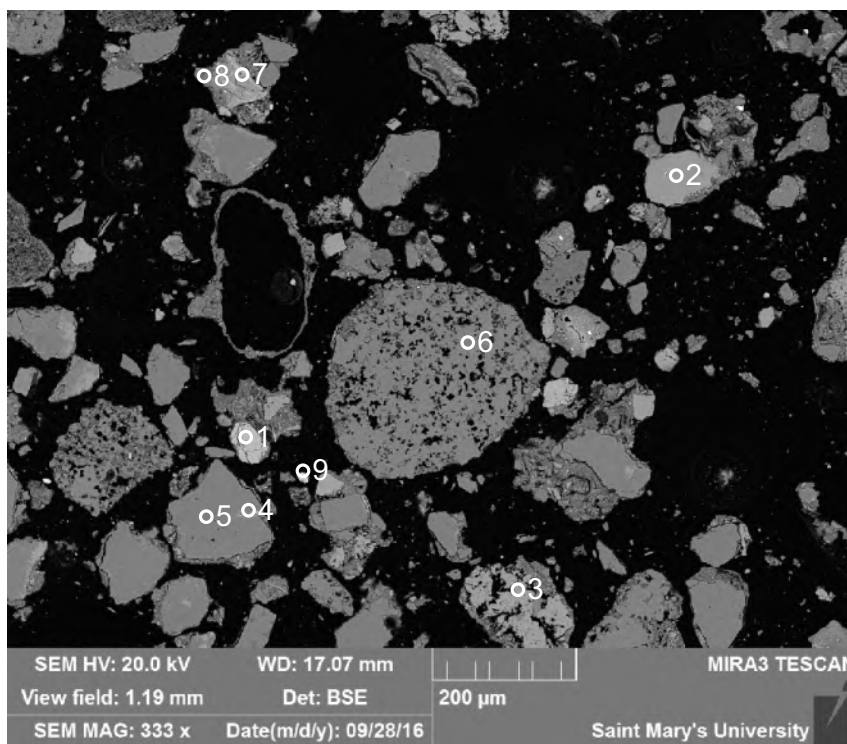

1. Epidote
2. K-Feldspar
3. Calcite +
4. Mix
5. Quartz
6. Quartz
7. Chlorite +
8. Mix
9. Siderite +

Figure A3.4: Sample S11 site 3 (SEM). This site includes: detrital epidote (1), K-feldspar (2), calcite + quartz (3), quartz (5, 6), chlorite (7), and siderite (9). Lithic clast: Quartz (6, chert).

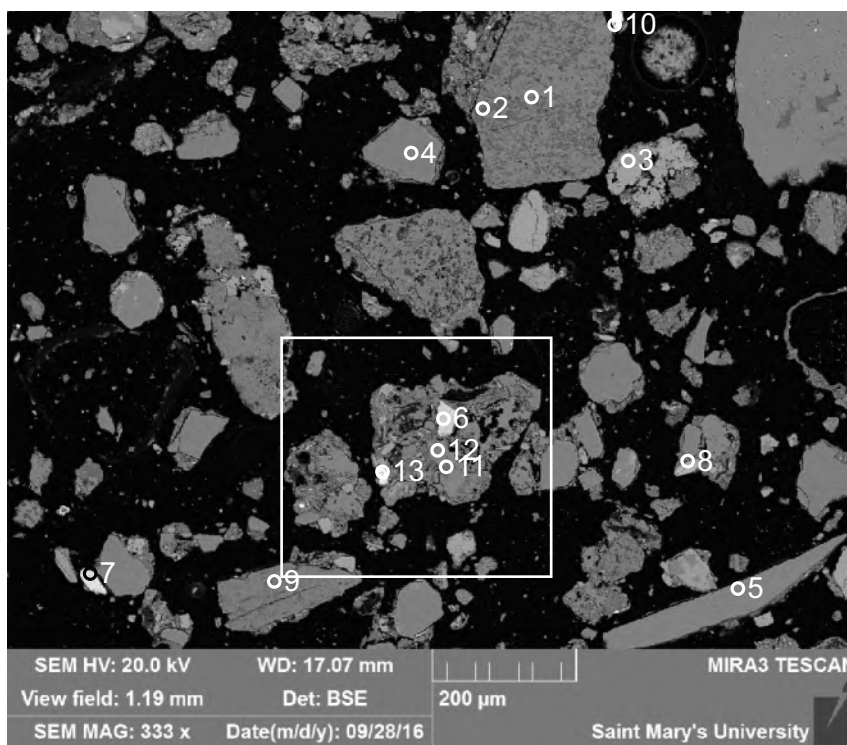

1. Quartz
2. Quartz
3. Calcite
4. Quartz
5. Quartz
6. Titanite +
7. "Ilmenite"
8. Chlorite
9. Quartz
10. Zircon
11. Quartz
12. Quartz
13. Fe-oxide/hydroxide +

Figure A3.5: Sample S11 site 4 (SEM). This site includes: detrital quartz (1, 2, 4, 5, 9, 11, 12), calcite (3), titanite (6), ilmenite (7), zircon (10), Fe-oxide/ hydroxide (13), and chlorite (8).

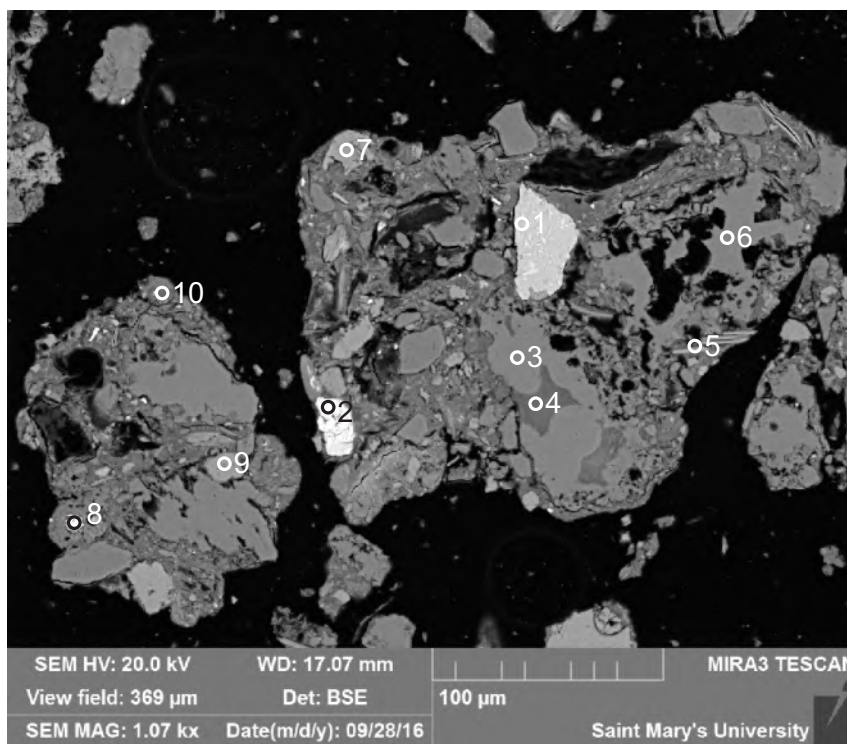

1. Titanite +
2. Fe-oxide/hydroxide +
3. Quartz
4. Quartz
5. Chlorite + Feldspar
6. Quartz
7. Calcite
8. Fe-oxide/hydroxide +
9. K-Feldspar
10. Chlorite +

Figure A3.6: Sample S11 site 5 (SEM). This site contains: Detrital titanite (1), Fe-oxide/hydroxide (2, 8), quartz (3, 4, 6), calcite (7), and K-feldspar (9) partly altered to chlorite.

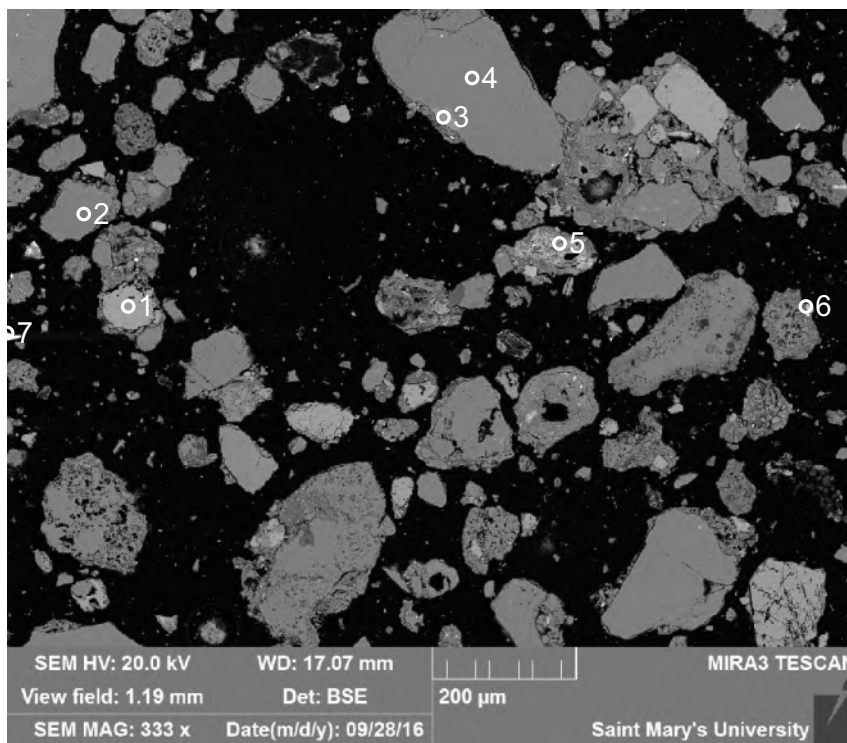

1. Calcite
2. Quartz
3. K-Feldspar
4. Quartz
5. Mix
6. Garnet (Almandine)
7. Zircon

Figure A3.7: Sample S11 site 6 (SEM). This site contains: detrital calcite (1), quartz (2, 4), K-feldspar (3), garnet (5), and zircon (7). Lithic clast: Quartz + K-feldspar (3-4, igneous).



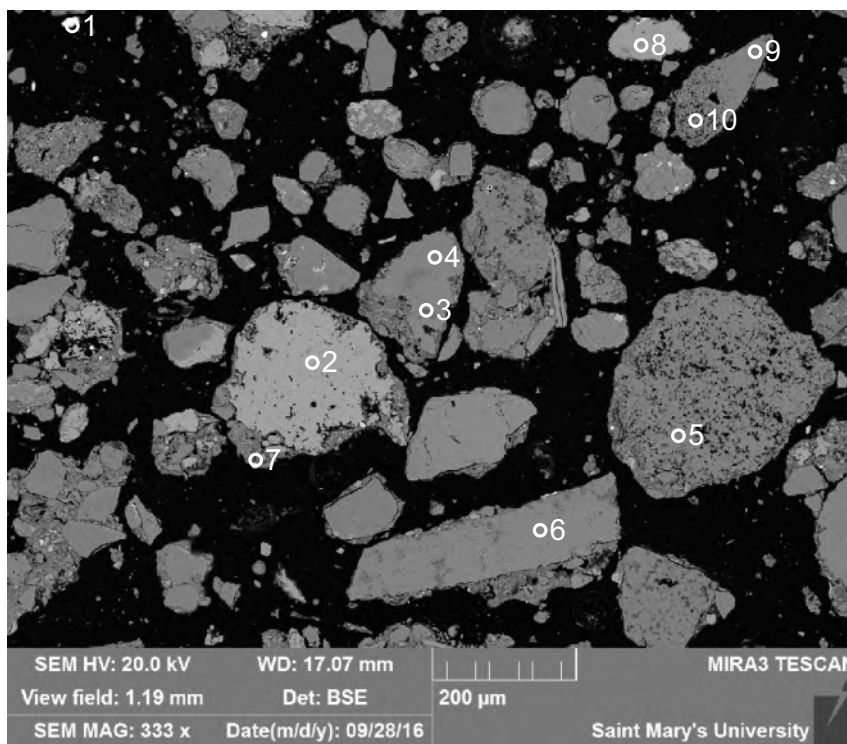

1. Mix
2. Calcite
3. Quartz
4. Quartz
5. Quartz +
6. Quartz
7. Pyrite
8. K-Feldspar
9. Quartz
10. Quartz

Figure A3.8: Sample S11 site 7 (SEM). This site contains: detrital quartz (3, 4, 5, 6, 9, 10), calcite (2), K-feldspar (8), and pyrite (7). Lithic clast: Quartz (5, chert).

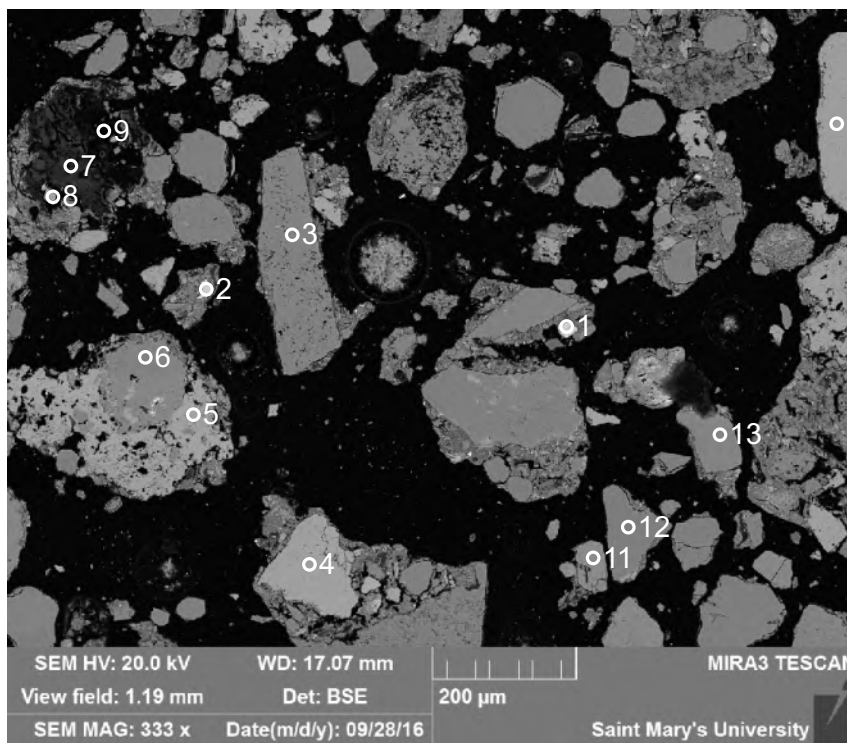

1. Spinel +
2. Garnet (Almandine)
3. Quartz
4. Calcite
5. Calcite
6. Quartz
7. Calcite + Chlorite +
8. Calcite
9. Hole
10. Calcite
11. Plagioclase (Andesine)
12. Quartz
13. Tourmaline

Figure A3.9: Sample S11 site 8 (SEM). This site contains: detrital spinel (1), quartz (3, 6, 12), calcite (4, 5, 8, 10), plagioclase (11), tourmaline (13), garnet (2), and chlorite (7). Lithic clast: Quartz + Calcite (5-6, cherty limestone).

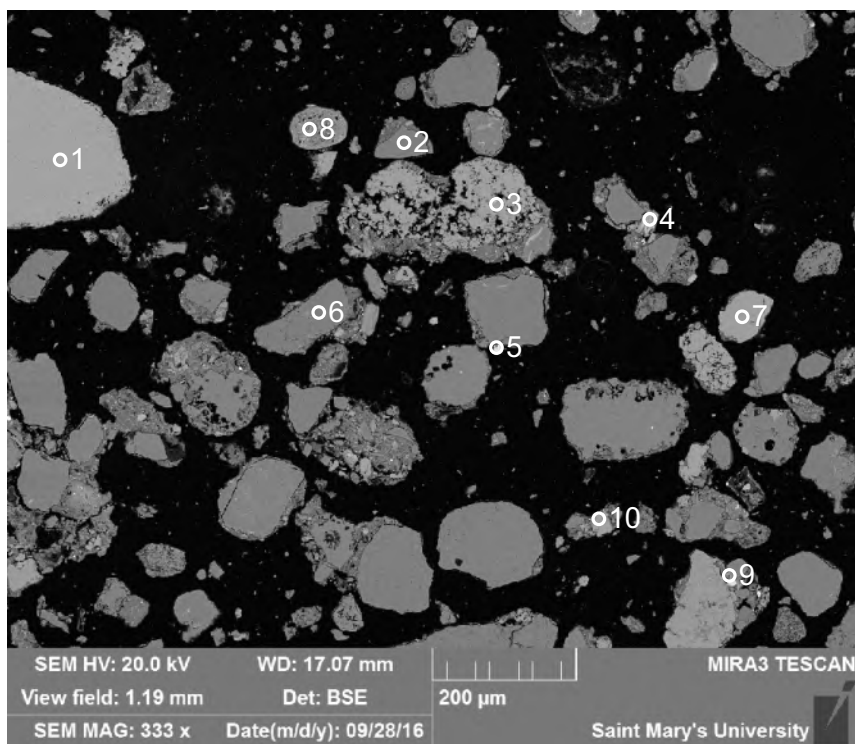

1. Calcite
2. Quartz
3. Calcite +
4. Chlorite + Calcite
5.  $\text{TiO}_2$
6. Quartz +
7. Calcite
8. Mix
9.  $\text{TiO}_2$  +
10. Calcite

Figure A3.10: Sample S11 site 9 (SEM). This site contains: detrital calcite (1, 3, 7, 10), quartz (2, 6), chlorite (4), and  $\text{TiO}_2$  (5, 9).

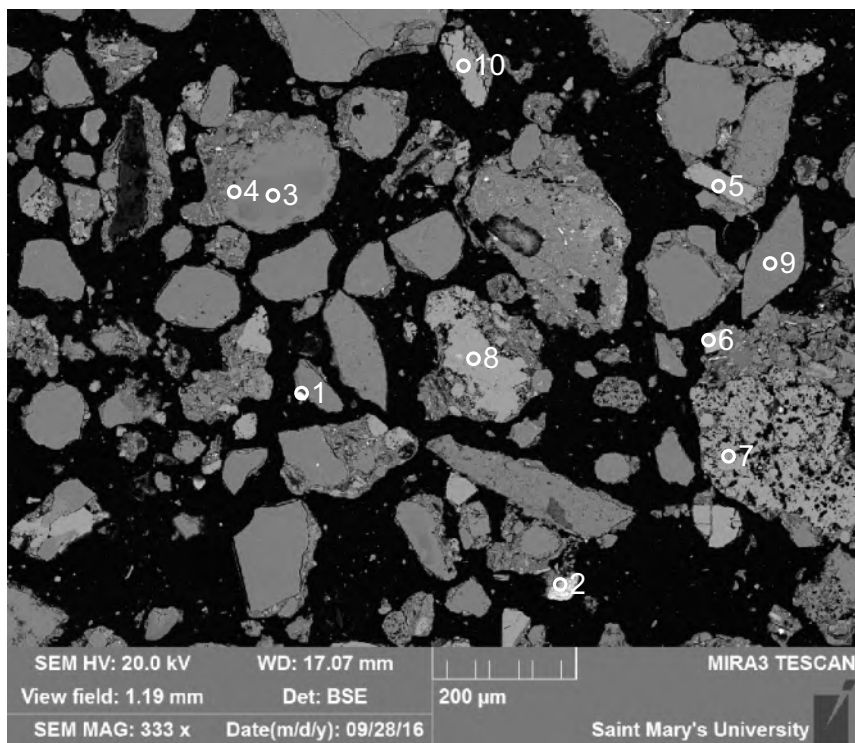

1. Zircon
2. Siderite
3. Quartz
4. Quartz
5. Calcite
6. Epidote
7. Calcite
8. Calcite
9. Quartz
10. Calcite +

Figure A3.11: Sample S11 site 10 (SEM). This site contains: detrital quartz (3, 4, 9), calcite (5, 7, 8, 10), zircon (1), epidote (6) and siderite (2). Lithic clast: Calcite + Epidote (6-7, sandy limestone).



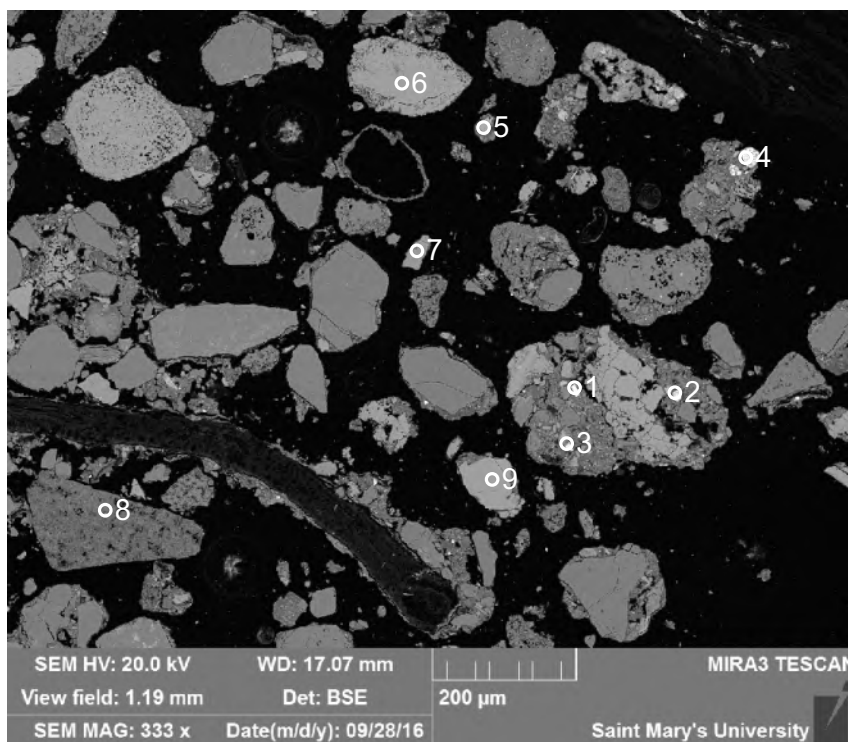

1. Barite
2. Fe-oxide/hydroxide +
3. Fe-oxide/hydroxide +
4. Pyrite +
5. Epidote
6. Calcite
7. K-Feldspar
8. Quartz + Fe Oxide +
9. Calcite

Figure A3.12: Sample S11 site 11 (SEM). This site contains: detrital barite (1), Fe-oxide/hydroxide (2, 3), calcite (6, 9), K-feldspar (7), quartz (8), pyrite (4), and epidote (5). Lithic clast: Barite + Fe-oxide/hydroxide + ?Calcite (1-3, hydrothermal).

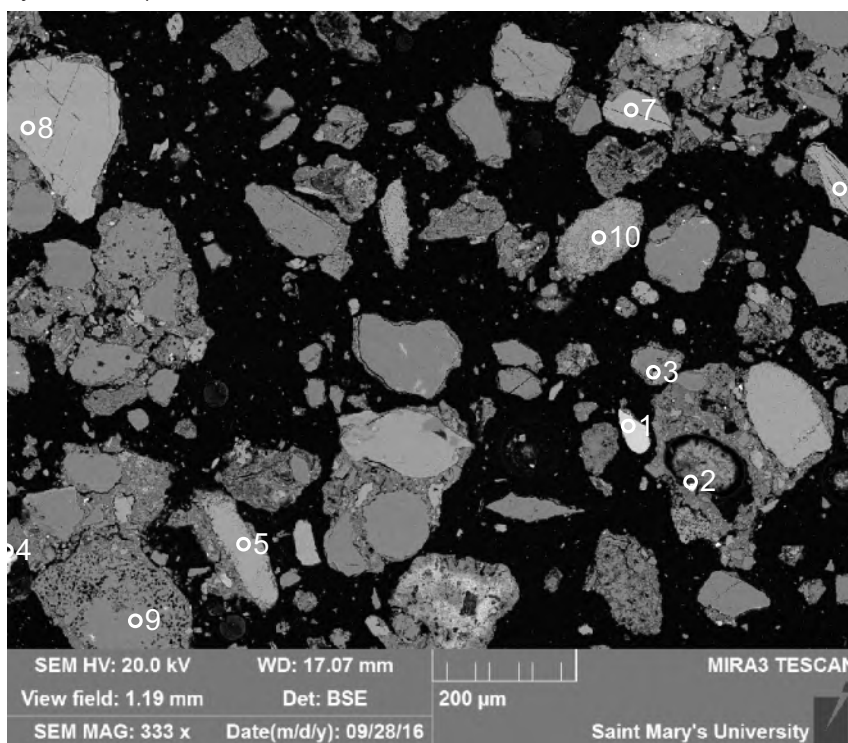

1. Garnet (Spessartine?)
2. Fe-oxide/hydroxide +
3.  $\text{TiO}_2$  +
4. Fe-oxide/hydroxide +
5. Calcite
6. Chlorite
7. Calcite
8. Calcite
9. Quartz
10. Calcite

Figure A3.13: Sample S11 site 12 (SEM). This site contains: detrital calcite (5, 7, 8, 10), chlorite (6), quartz (9), garnet (1), and Fe-oxide/hydroxide (2,4).

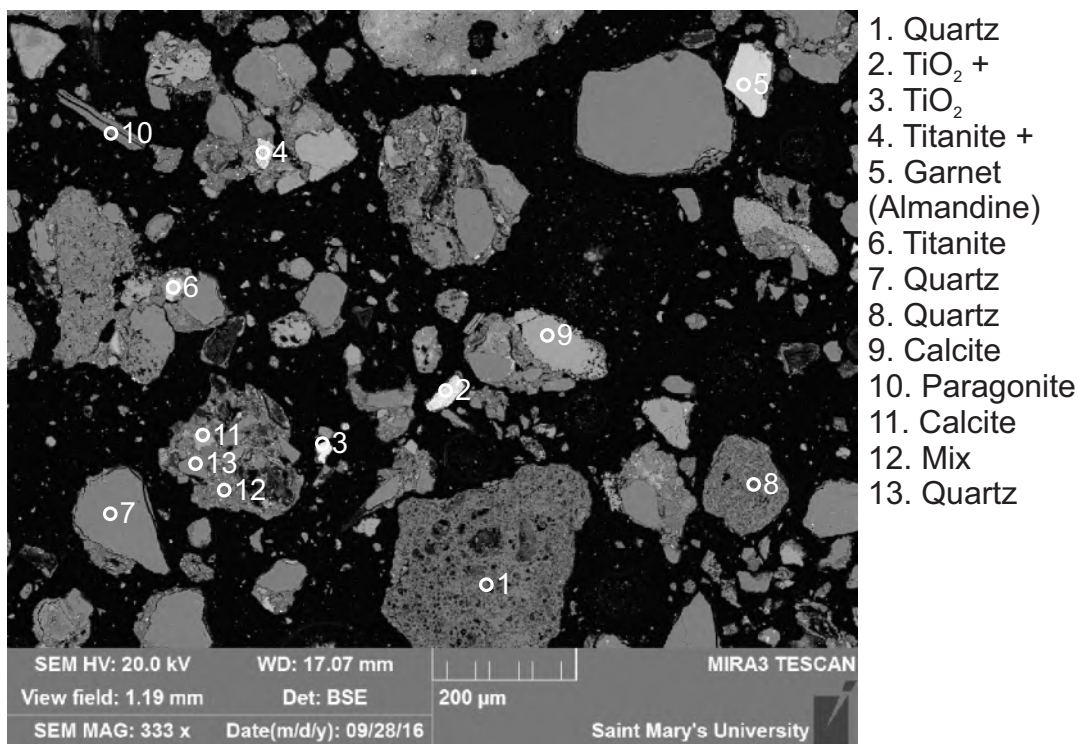

Figure A3.14: Sample S11 site 13 (SEM). This site includes: Detrital quartz (1,7,8,13), calcite (9,11),  $\text{TiO}_2$  (2,3), paragonite (10), titanite (4,6), and garnet (5). Lithic clast: Quartz + Calcite (11-13, cherty limestone).

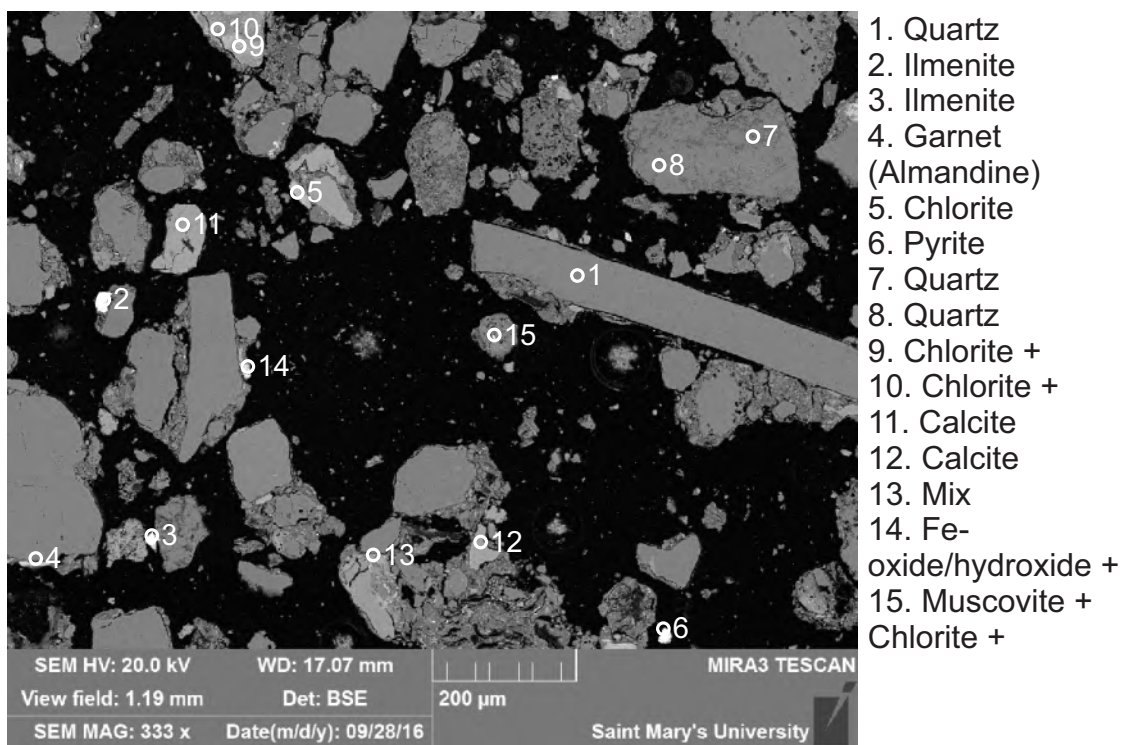

Figure A3.15: Sample S11 site 14 (SEM). This site contains: detrital quartz (1, 7, 8), calcite (11, 12), ilmenite (2, 3), garnet (4), chlorite (5), pyrite (6), Fe-oxide/hydroxide (14), and a mix between muscovite and chlorite (15).



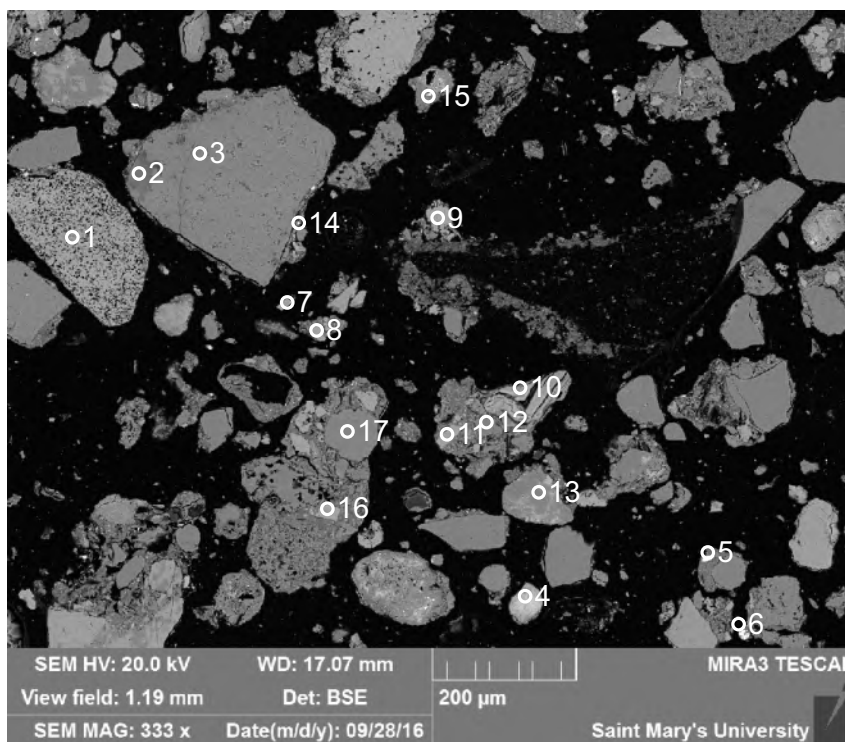

1. Calcite
2. Quartz
3. Quartz
4. Garnet (Almandine)
5. Ilmenite
6. Pyrite +
7. Calcite
8. Calcite
9. Calcite
10. Orthopyroxene
11. Calcite
12. Quartz
13. Quartz +
14. Fe-oxide/hydroxide +
15. Fe-oxide/hydroxide +
16. Calcite
17. Quartz

Figure A3.16: Sample S11 site 15 (SEM). This site contains: detrital calcite (1, 7, 8, 9, 11, 16), quartz (2, 3, 12, 13, 17), garnet (4), ilmenite (5), pyrite (6), orthopyroxene (10), and Fe-oxide/hydroxide (14,15). Lithic clasts: Quartz + Calcite (16-17, cherty limestone); Orthopyroxene + Quartz + Calcite (10-12, sandstone).

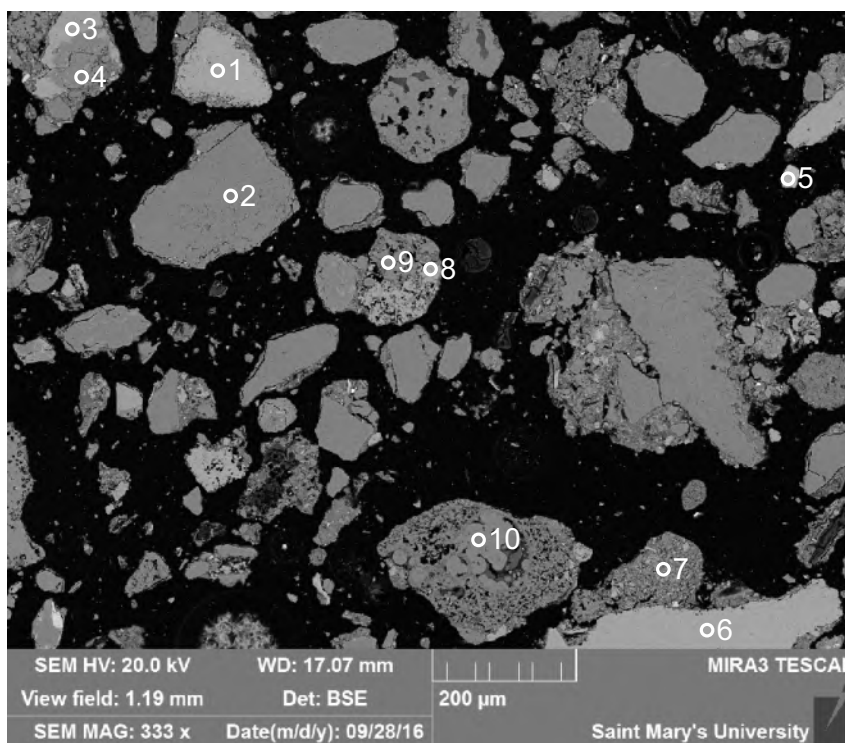

1. Calcite
2. Quartz +
3. K-Feldspar
4. Albite
5. Epidote
6. Calcite
7. Mix
8. Calcite +
9. Quartz
10. Quartz

Figure A3.17: Sample S11 site 16 (SEM). This site contains: detrital calcite (1, 6, 8), quartz (2, 9, 10), K-feldspar (3), albite (4), and epidote (5). Lithic clasts: K-feldspar + Albite (3-4, igneous); Quartz + Calcite (8-9, cherty limestone).

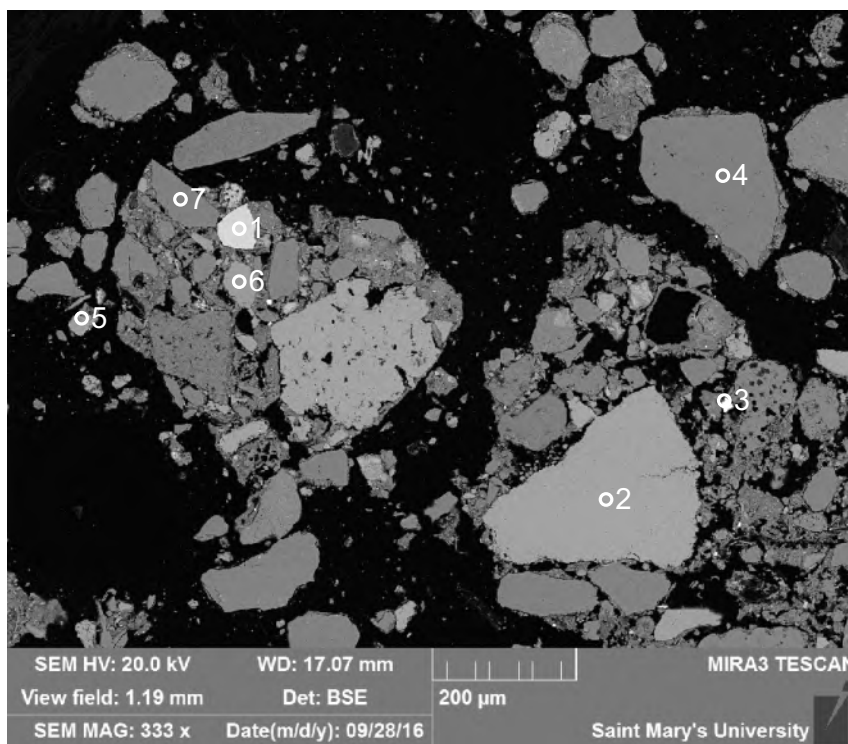

1. Garnet?
2. Calcite
3. Zircon
4. Quartz
5. Calcite + Quartz
6. K-Feldspar
7. Quartz

Figure A3.18: Sample S11 site 17 (SEM). This site contains: Detrital garnet (1), K-feldspar (6), quartz (4,7), calcite (2), and zircon (3).

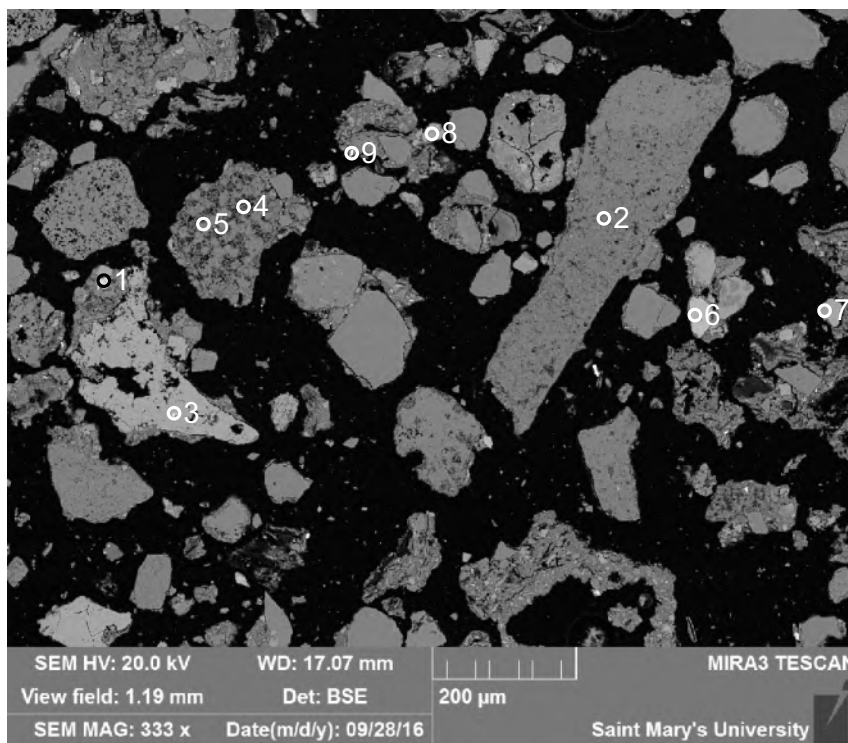

1. Ilmenite +
2. Quartz
3. Fe-oxide/hydroxide + Calcite +
4. Quartz
5. Quartz
6. Mix
7. Calcite
8. Calcite
9. Zircon +

Figure A3.19: Sample S11 site 18 (SEM). This site contains: detrital quartz (2, 4, 5), calcite (7, 8), ilmenite (1), Fe-oxide/hydroxide (3), and zircon (9).



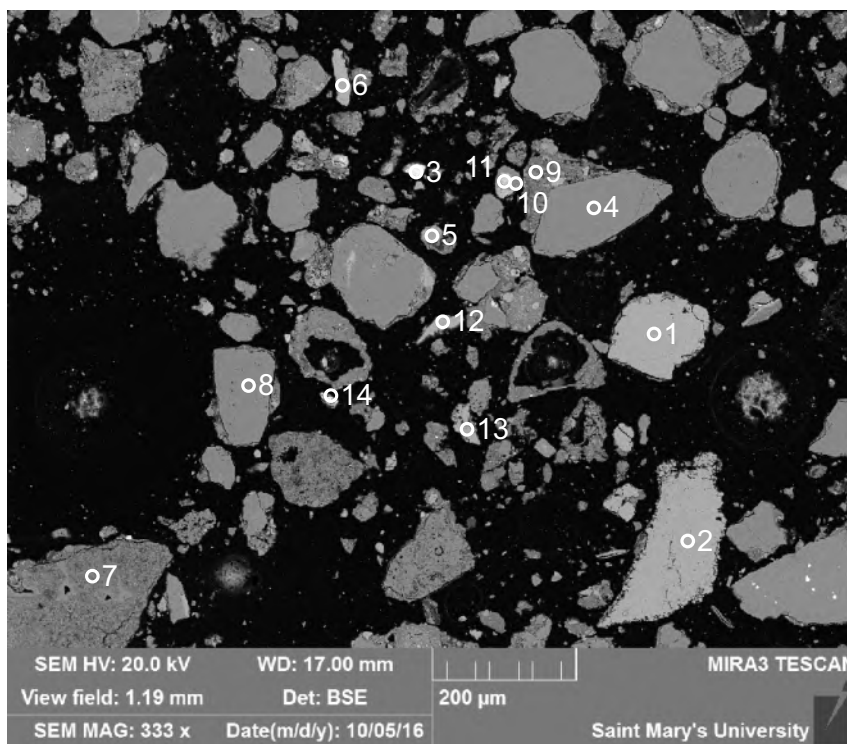

1. Calcite
2. Calcite
3.  $\text{TiO}_2$  + Quartz
4. Quartz
5. Calcite
6. Calcite
7. Quartz
8. Quartz
9. Mix
10. Quartz +
11. Ilmenite + Chlorite
12. Calcite
13. Calcite
14.  $\text{TiO}_2$  +

Figure A3.20: Sample S11 site 19 (SEM). This site includes: detrital calcite (1, 2, 5, 6, 12, 13), quartz (4, 7, 8, 10),  $\text{TiO}_2$  (3,14), and ilmenite + chlorite (11).

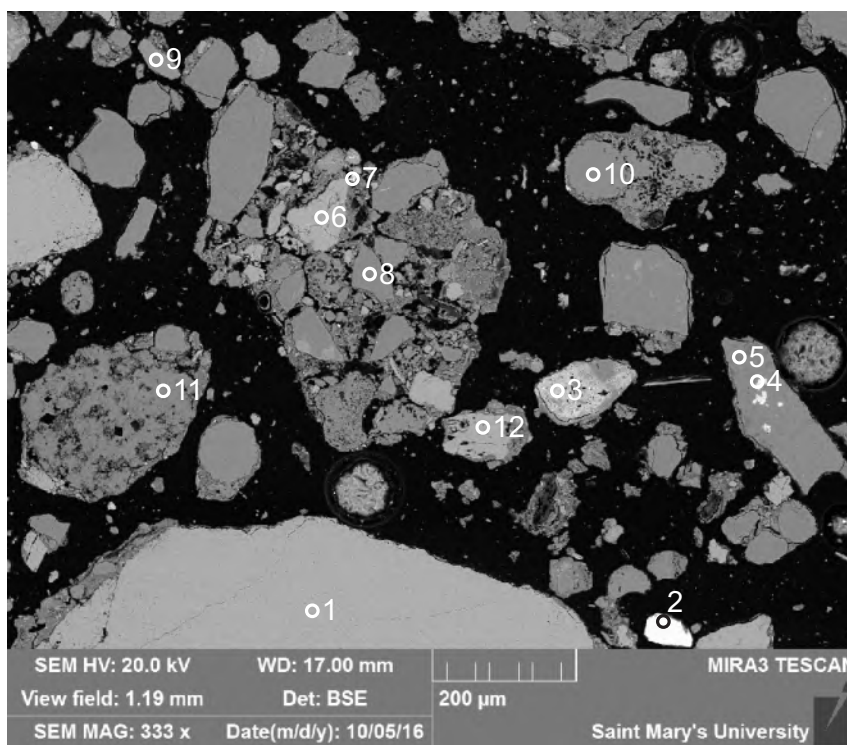

1. Calcite
2. Spinel
3. Chlorite +
4. Fe-oxide/hydroxide +
5. Quartz
6. Calcite
7. Fe-oxide/hydroxide +
8. Quartz
9. Plagioclase (Oligoclase)
10. Quartz
11. Quartz
12. Calcite

Figure A3.21: Sample S11 site 20 (SEM). This site includes: Detrital calcite (1,6,12), quartz (5,8,10-11), spinel (2), chlorite (3), plagioclase (oligoclase) (9), and Fe- oxide/hydroxide (4,7).

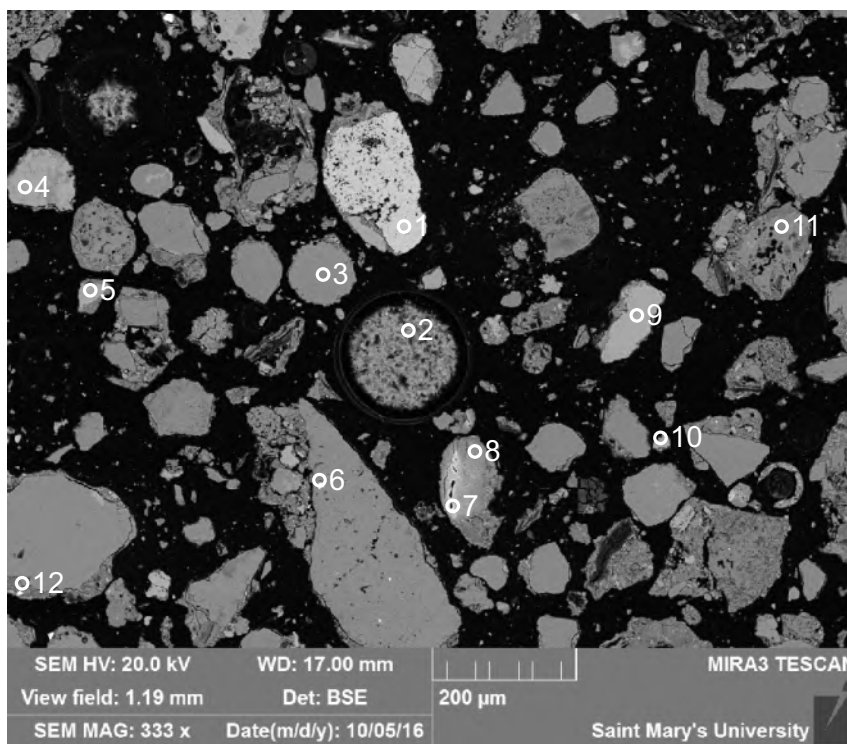

1. Apatite
2. Mix
3. Quartz
4. K-Feldspar
5. Calcite
6. Fe-oxide/hydroxide +
7. Mix
8. Mix
9. Calcite
10. Calcite
11. Quartz
12. Muscovite +

Figure A3.22: Sample S11 site 21 (SEM). This site includes: Detrital apatite (1), quartz (3, 11), K-feldspar (4), calcite (5, 9, 10), and Fe-oxide/hydroxide (6).

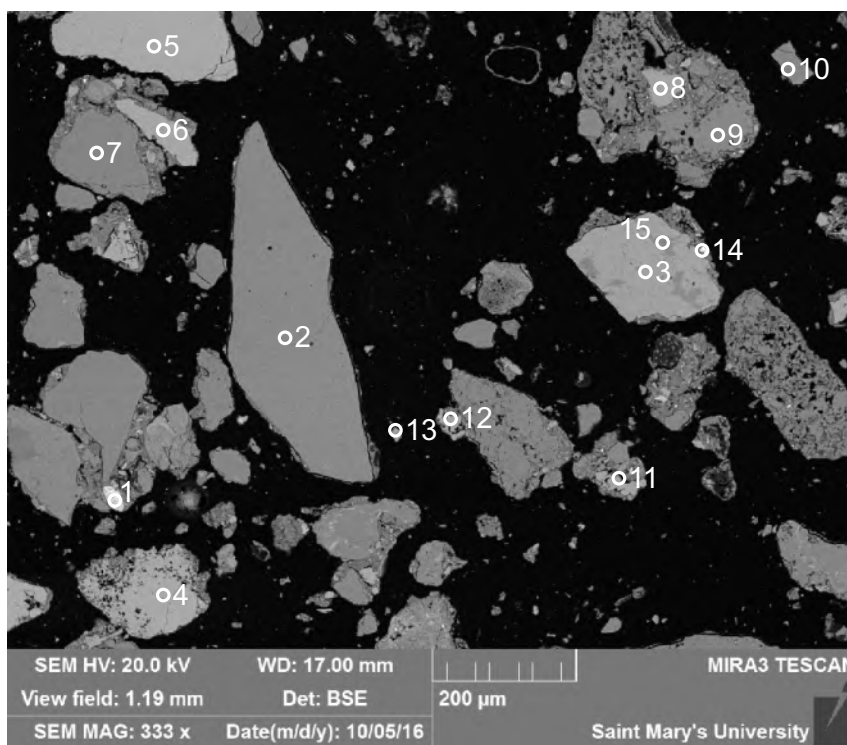

1. "Ilmenite" +
2. Quartz
3. K-Feldspar
4. Calcite
5. Calcite
6. Calcite
7. Quartz
8. Calcite
9. Quartz
10. Quartz
11. Calcite
12. Calcite
13. K-Feldspar
14. Fe-oxide/hydroxide +
15. Albite

Figure A3.23: Sample S11 site 22 (SEM). This site includes: detrital quartz (2, 7, 9, 10), calcite (4, 5, 6, 8, 11, 12), altered ilmenite (1), K-feldspar (3,13), albite (15), and Fe-oxide/hydroxide (14). Lithic clasts: K-feldspar + Albite (3,15, igneous); Quartz + Calcite (8-9, cherty limestone).



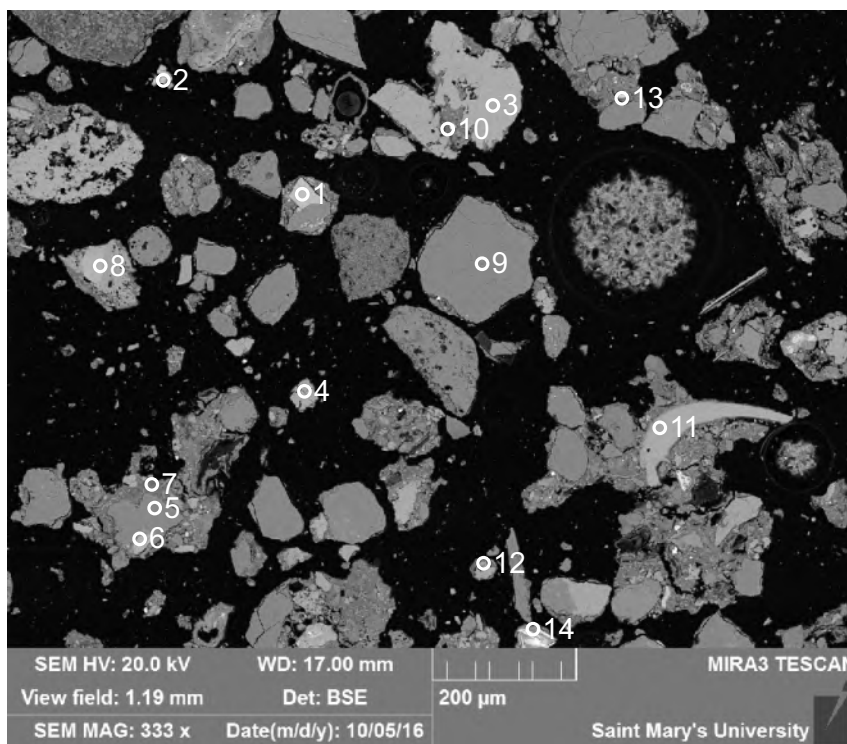

1. Epidote
2. Corundum
3. Calcite
4. Calcite
5. Quartz
6. Biotite
7. Kaolinite +
8. K-Feldspar
9. Quartz
10. Garnet (Almandine)
11. Calcite
12. Calcite+
13. Titanite
14. Titanite +

Figure A3.24: Sample S11 site 23 (SEM). This site includes: detrital corundum (2), calcite (3, 4, 11), quartz (5, 9), K-feldspar (8), biotite (6), kaolinite (7), epidote (1), garnet (10), and titanite (13, 14). Lithic clasts: Calcite + Garnet (3,10, metamorphic); Quartz + Biotite + Kaolinite (5-7, quartz with biotite and kaolinite inclusions, igneous).

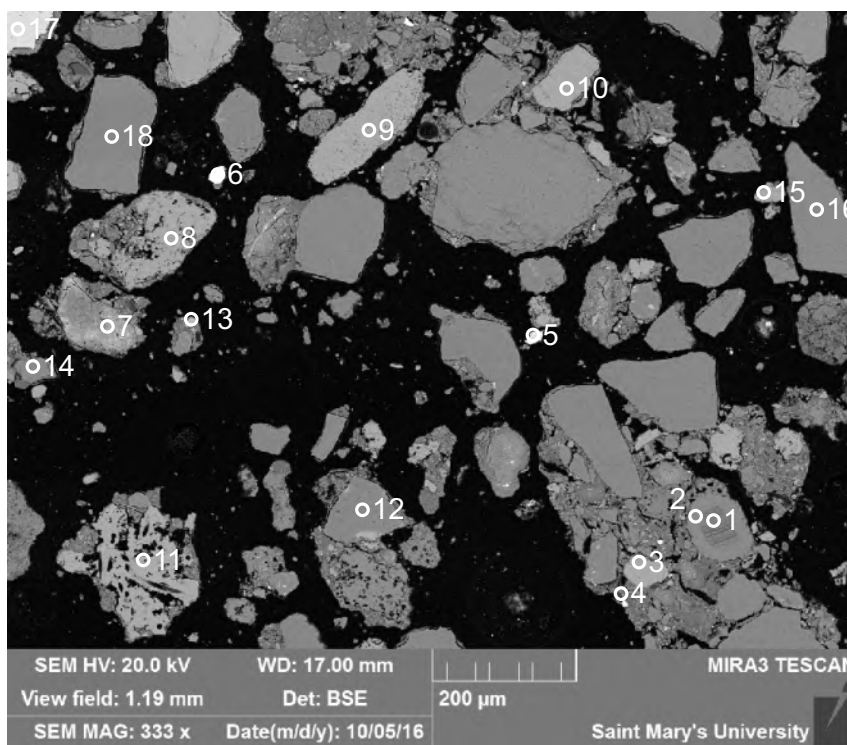

1. Quartz
2. Quartz
3. Calcite
4. Mix
5. "Ilmenite"
6. Zircon
7. Mix
8. Calcite
9. Calcite
10. K-Feldspar
11. Calcite
12. Quartz
13. Epidote
14. Quartz
15. Calcite
16. Quartz
17. Titanite
18. Quartz

Figure A3.25: Sample S11 site 24 (SEM). This site includes: detrital quartz (1, 2, 12, 14, 16, 18), calcite (3, 8, 9, 11, 15), K-feldspar (10), zircon (6), epidote (13), and titanite (17).

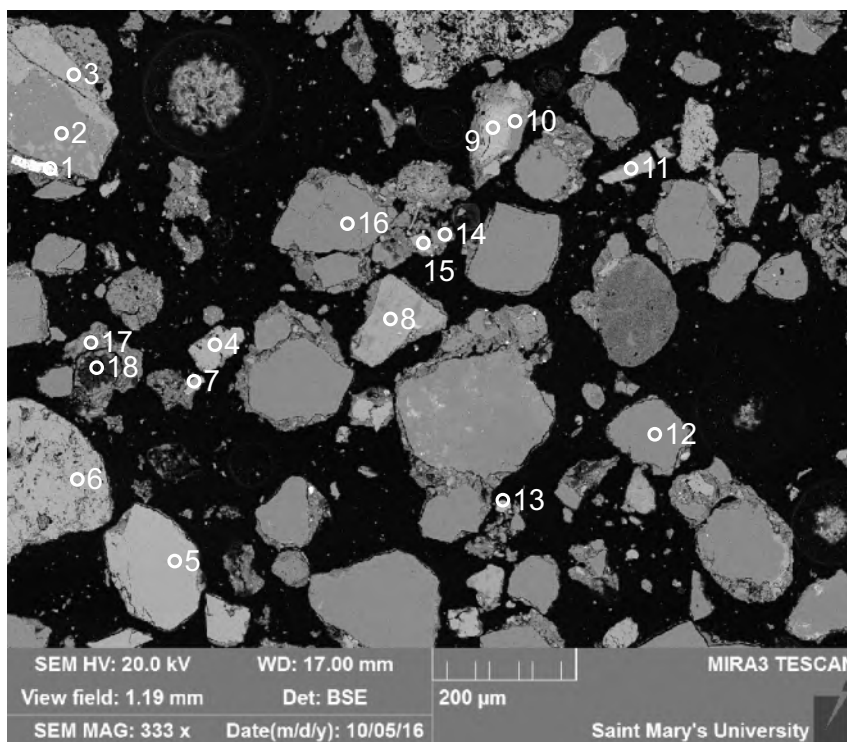

1. Limonite +
2. Quartz
3. K-Feldspar
4. Calcite
5. Calcite
6. Calcite +
7. Calcite
8. K-Feldspar +
9. Garnet (Almandine)
10. Quartz
11. Calcite
12. Quartz
13. Garnet (Almandine)
14. Quartz
15. Calcite
16. Quartz
17. Quartz
18. Mix

Figure A3.26: Sample S11 site 25 (SEM). This site includes: detrital calcite (4, 5, 6, 7, 11, 15), quartz (2, 10, 12, 14-17), K-feldspar (3,8), and garnet (9,13). Lithic clasts: Quartz + K-feldspar + Limonite (1-3, igneous); Quartz + Garnet (9-10, sandstone or metamorphic); Quartz + Calcite (14-16, sandstone).

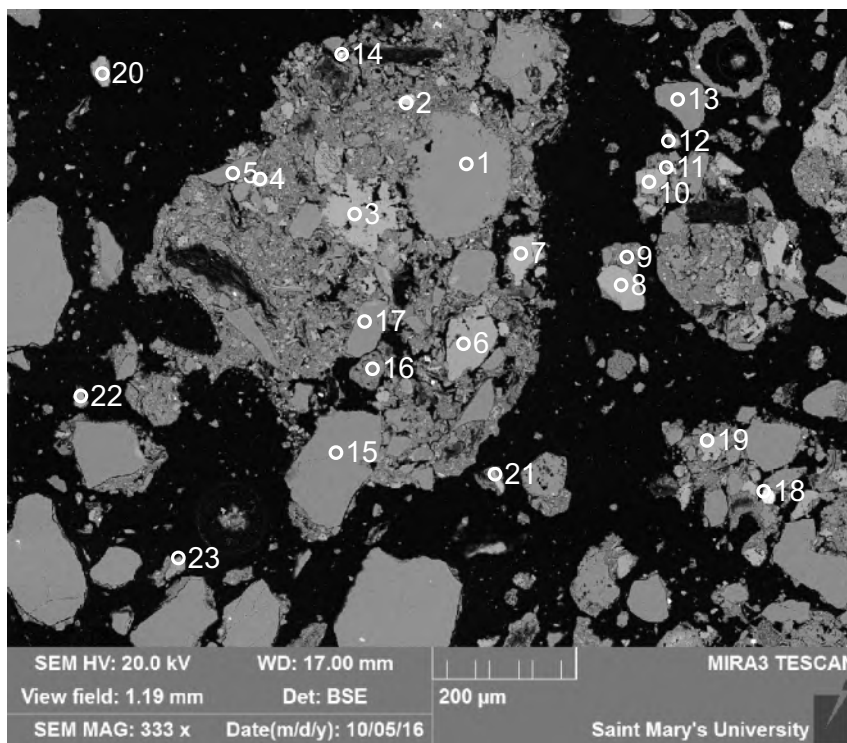

1. Quartz
2. Titanite
3. Calcite
4. Calcite
5. Quartz
6. K-Feldspar
7. Calcite
8. K-Feldspar
9. Epidote
10. Calcite
11. Mix
12. Calcite
13. Quartz
14. Mix
15. Quartz
16. Quartz
17. Quartz
18. Corundum +
19. Calcite
20. K-Feldspar
21. Biotite
22. Calcite
23. K-Feldspar

Figure A3.27: Sample S11 site 26 (SEM). This site includes: Detrital quartz (1, 5, 13, 15, 16, 17), calcite (3, 4, 7, 9, 22), titanite (2), K-feldspar (6, 8, 20, 23), epidote (9), corundum (18), biotite (21), and titanite (2). Lithic clasts: K-feldspar + Epidote (8-9, igneous).



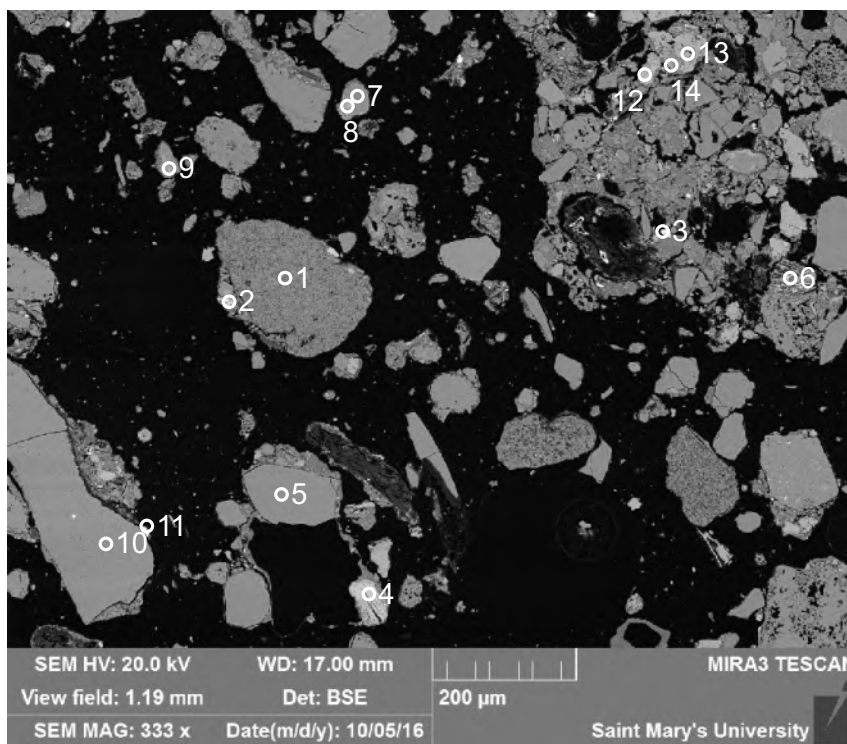

1. Quartz
2. Mix
3. Fe-oxide/hydroxide +
4. Chlorite +
5. Quartz
6. Mix
7. Quartz
8. Garnet (Almandine)
9. Garnet + Quartz
10. Quartz
11. Arsenopyrite
12. Kaolinite + Chlorite +
13. Calcite
14. Quartz

Figure A3.28: Sample S11 site 27(SEM). This site includes: Detrital quartz (1,5,7,10,14), Fe-oxide/hydroxide (3), calcite (13), garnet (8,9), and arsenopyrite (11).

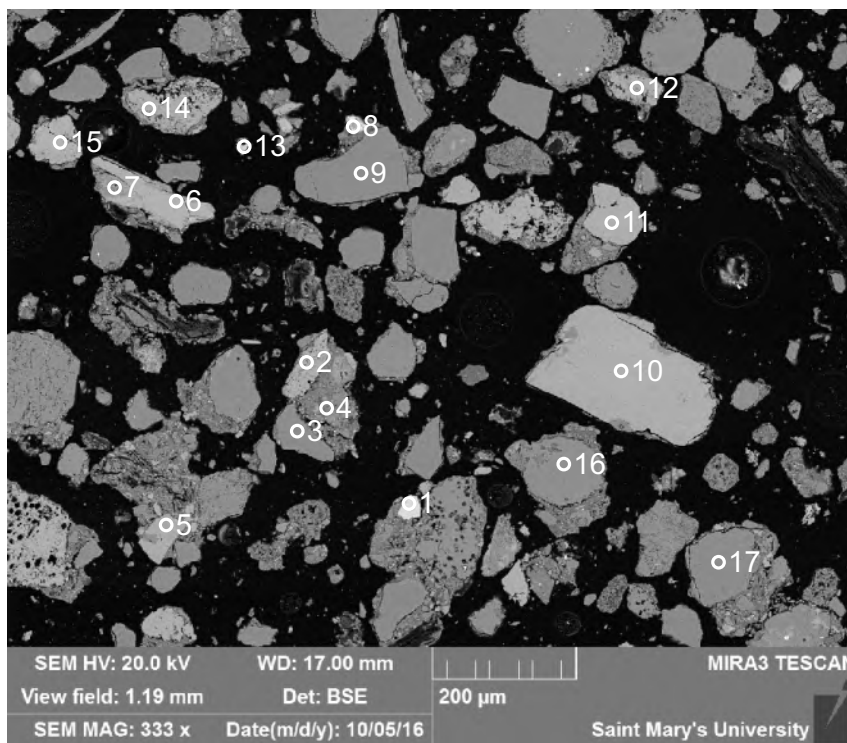

1. Apatite
2. Calcite +
3. Quartz
4. Kaolinite + Chlorite +
5. K-Feldspar
6. Calcite
7. Chlorite + Muscovite
8. Muscovite +
9. Quartz
10. K-Feldspar
11. Calcite
12. Calcite +
13. Mix
14. Calcite
15. Calcite
16. Quartz
17. Quartz

Figure A3.29: Sample S11 site 28 (SEM). This site includes: Detrital quartz (3, 9, 16, 17), calcite (2, 6, 11, 12, 14, 15), K-feldspar (5, 10), apatite (1), muscovite (8), chlorite and kaolinite (4). Lithic clasts: Calcite + Chlorite (6-7, metamorphic); Quartz + Calcite + Kaolinite + Chlorite (2-4, metamorphic).

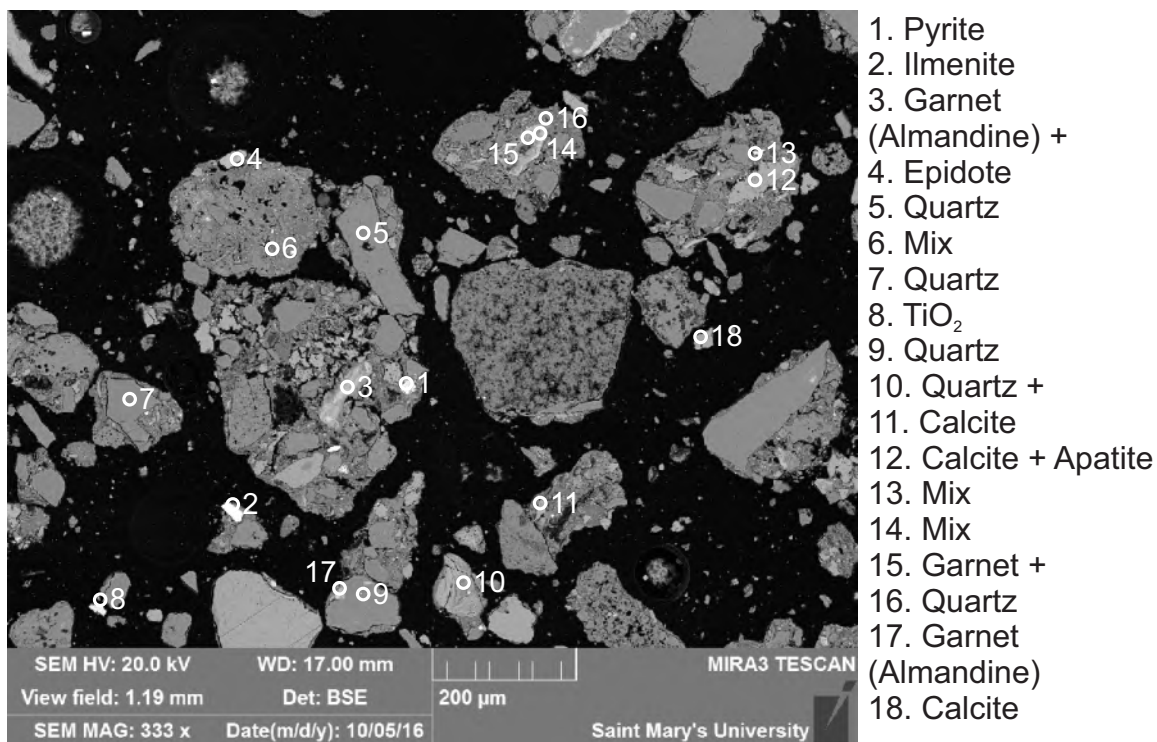

Figure A3.30: Sample S11 site 29 (SEM). This site includes: Detrital pyrite (1), garnet (3,15,17), epidote (4), quartz (5,7,9,10,16), calcite (11,18), ilmenite (2), and  $\text{TiO}_2$  (8).

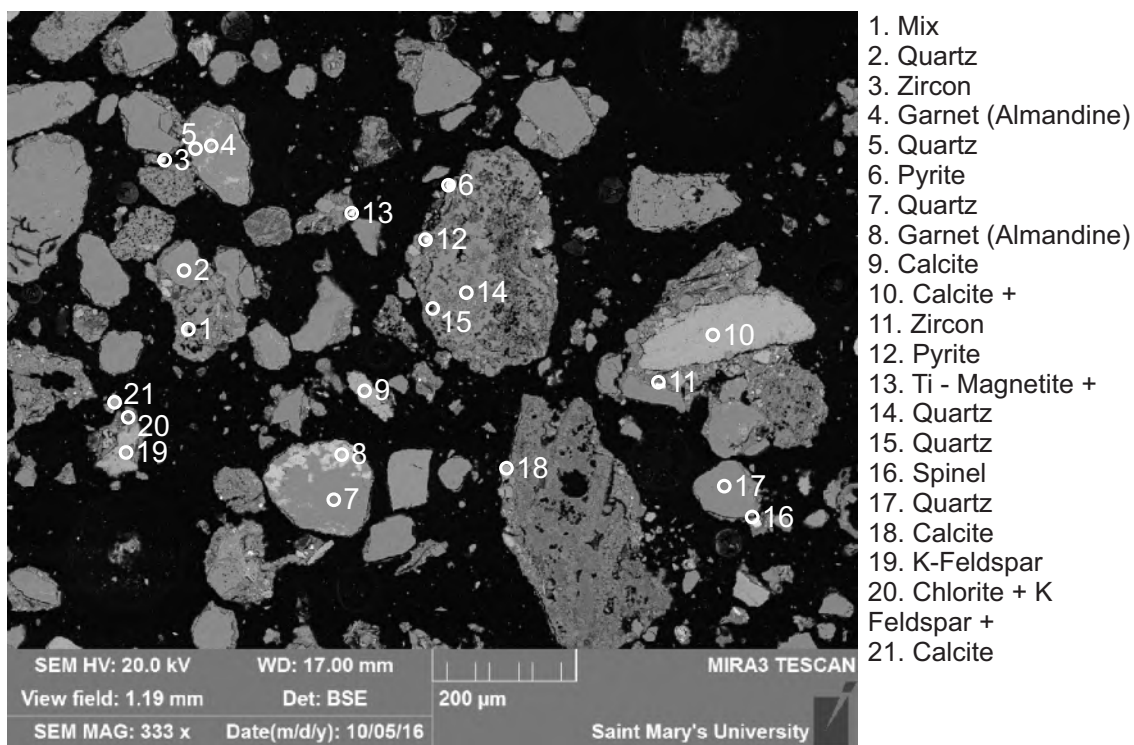

Figure A3.31: Sample S11 site 30 (SEM). This site includes: detrital quartz (2, 5, 7, 14, 15, 17), calcite (9, 10, 18, 21), K-feldspar (19), zircon (3, 11), garnet (4, 8), pyrite (6, 12), Ti-Magnetite (13), and spinel (16). Lithic clasts: K-feldspar + Chlorite (19-20, chloritization of K-feldspar, igneous); Quartz + Garnet (7-8, metamorphic); Quartz + Pyrite (6,12,14-15, chert with pyrite).



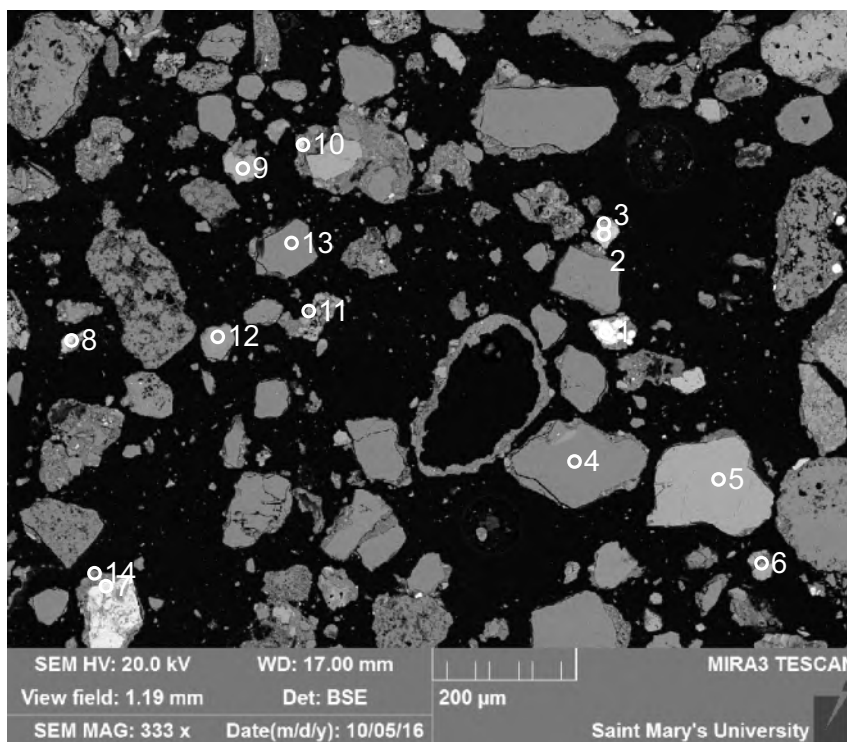

1. Fe-oxide/hydroxide +
2. Titanite
3. Garnet
4. Quartz
5. Calcite
6. Calcite
7. Mix
8. Mix
9. Calcite
10. Mix
11. Calcite +
12. Plagioclase (Andesine)
13. Quartz
14. Calcite +

Figure A3.32: Sample S11 site 31 (SEM). This site includes: Detrital quartz (4, 13), calcite (5, 6, 9, 11, 14), plagioclase (12), Fe-oxide/hydroxide (1), titanite (2), and garnet (3).

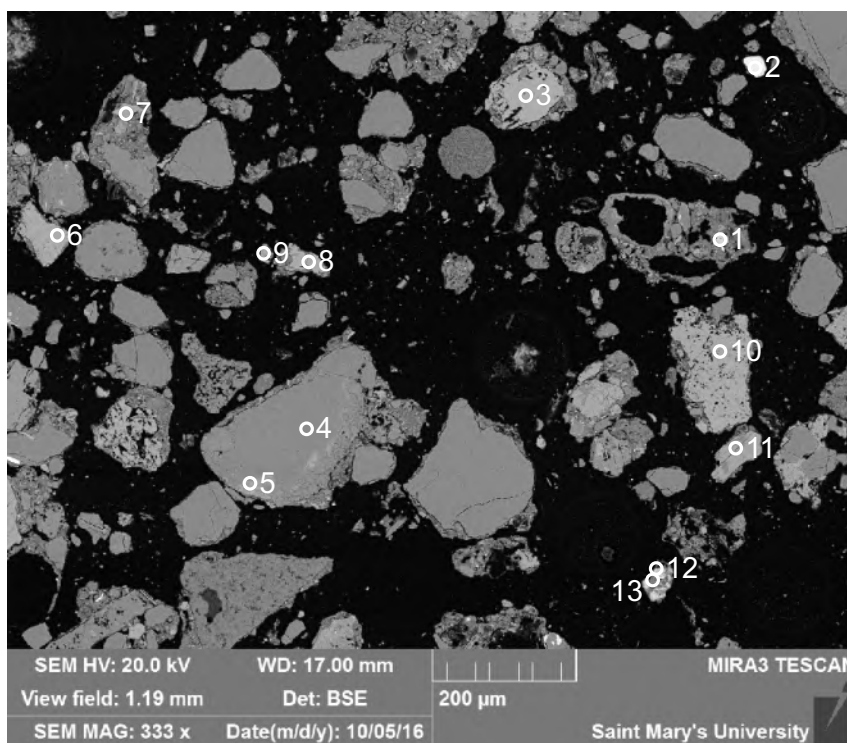

1. Titanite
2.  $\text{TiO}_2$
3. Calcite +
4. Quartz
5. K-Feldspar
6. Calcite
7. Calcite
8. Calcite
9. Calcite
10. Calcite
11. K-Feldspar
12. Mix
13. Garnet (Almandine)

Figure A3.33: Sample S11 site 32 (SEM). This site includes: Detrital quartz (4), calcite (6, 7, 8, 9, 10), K-feldspar (5, 11), titanite (1),  $\text{TiO}_2$  (2), and garnet (13). Lithic clast: Quartz + K-feldspar (4-5, igneous).

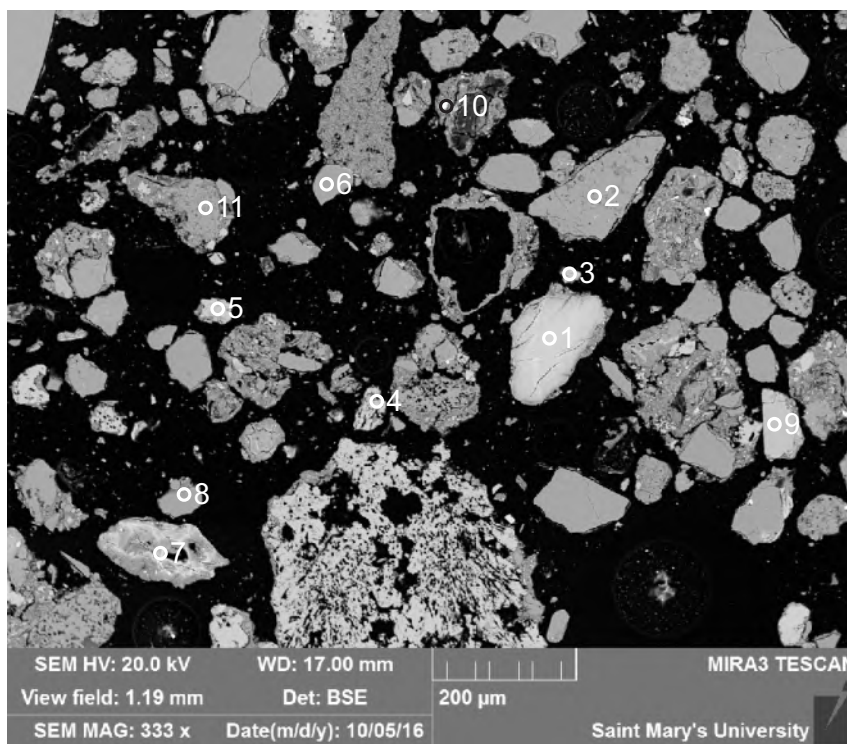

1. Chlorite +
2. Quartz
3. Calcite
4. Calcite
5. Calcite
6. Quartz
7. Garnet +
8. Quartz
9. K-Feldspar
10. Mix
11. Quartz

Figure A3.34: Sample S11 site 33 (SEM). This site includes: Detrital chlorite (1), quartz (2, 6, 8, 11), calcite (3, 4, 5), and K-feldspar (9).

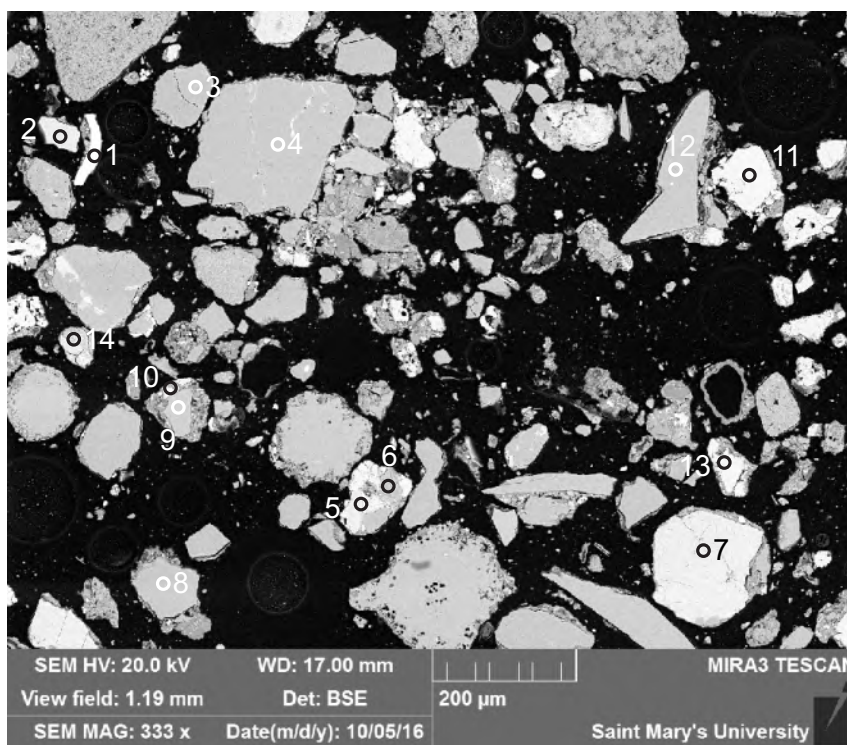

1. Apatite
2. K-Feldspar
3. Quartz
4. Albite
5. Mix
6. Mix
7. K-Feldspar
8. Quartz
9. Quartz
10. Calcite
11. Calcite
12. Quartz
13. Calcite
14. Quartz +

Figure A3.35: Sample S11 site 34 (SEM). This site includes: Detrital apatite (1), K-feldspar (2, 7), quartz (3, 8, 9, 12, 14), albite (4), and calcite (10, 11, 13).



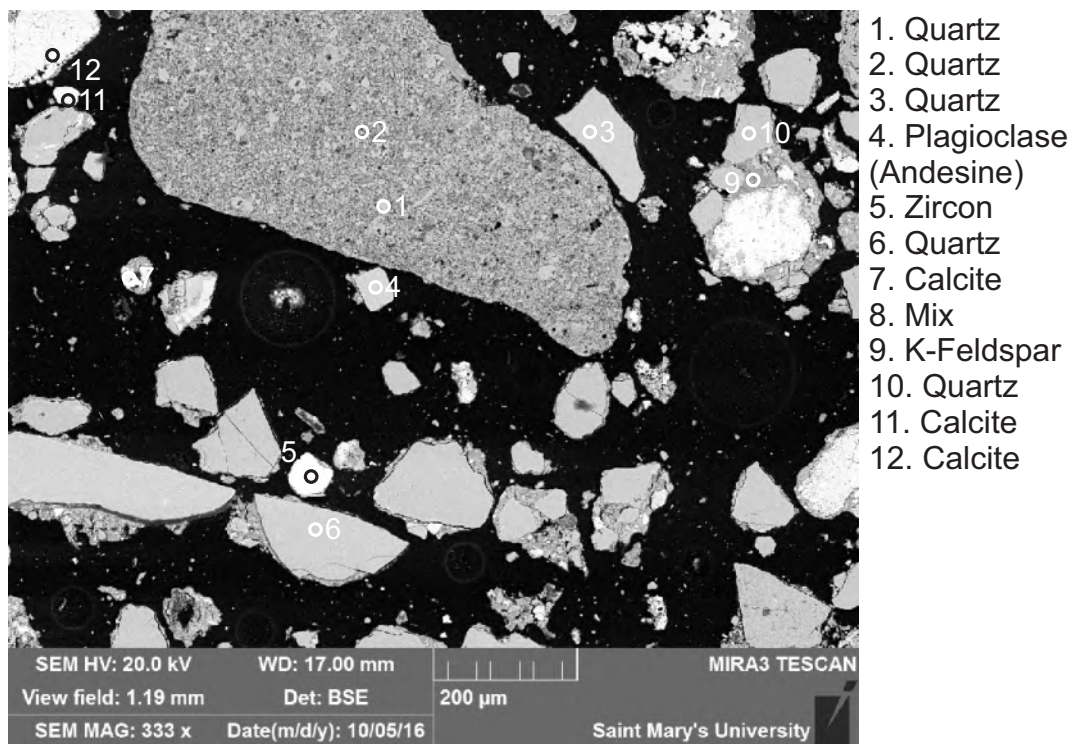

Figure A3.36: Sample S11 site 35 (SEM). This site includes: Detrital quartz (1, 2, 3, 6, 10), plagioclase (4), calcite (7, 11, 12), K-feldspar (9), zircon (5).

Table A3.1: EDS analyses of sample S11.

| Sample | Site | Position | Mineral   | SiO2   | TiO2  | Al2O3 | FeO   | MnO  | MgO   | CaO   | Na2O  | K2O   | P2O5  | SO3   | F    | Cl   | Sc2O3 | V2O5 | Cr2O3 | CoO | NiO | CuO | ZnO | As2O3 | ZrO2 | BaO | Yb2O3 | HfO2 | WO3  | PtO2 | Total | Actual Total |
|--------|------|----------|-----------|--------|-------|-------|-------|------|-------|-------|-------|-------|-------|-------|------|------|-------|------|-------|-----|-----|-----|-----|-------|------|-----|-------|------|------|------|-------|--------------|
| S11    | 1    | 1        | Zrn       | 31.26  |       |       |       |      |       |       |       |       |       |       |      |      |       |      |       |     |     |     |     | 68.74 |      |     |       |      |      | 100  | 114   |              |
| S11    | 1    | 2        | Qz        | 100.00 |       |       |       |      |       |       |       |       |       |       |      |      |       |      |       |     |     |     |     |       |      |     |       |      |      | 100  | 119   |              |
| S11    | 1    | 3        | Cal       |        |       |       |       |      | 0.49  | 55.51 |       |       |       |       |      |      |       |      |       |     |     |     |     |       |      |     |       |      |      | 56   | 55    |              |
| S11    | 1    | 4        | Mix       | 69.82  | 0.38  | 22.48 | 2.84  |      | 1.51  | 0.97  | 0.28  | 1.56  |       |       |      | 0.17 |       |      |       |     |     |     |     |       |      |     |       |      |      | 100  | 97    |              |
| S11    | 1    | 5        | Cal       |        |       |       |       |      | 0.58  | 55.42 |       |       |       |       |      |      |       |      |       |     |     |     |     |       |      |     |       |      |      | 56   | 58    |              |
| S11    | 1    | 6        | Py        | 0.51   |       |       | 30.25 |      |       | 0.39  |       |       |       | 67.27 |      |      |       |      |       |     |     |     |     |       |      |     |       |      | 1.58 | 100  | 160   |              |
| S11    | 1    | 7        | Grt (Alm) | 39.73  |       | 20.98 | 29.02 | 4.62 | 2.65  | 3.01  |       |       |       |       |      |      |       |      |       |     |     |     |     |       |      |     |       |      |      | 100  | 112   |              |
| S11    | 1    | 8        | Cal       |        |       |       |       |      |       | 56.00 |       |       |       |       |      |      |       |      |       |     |     |     |     |       |      |     |       |      |      | 56   | 55    |              |
| S11    | 1    | 9        | Qz        | 99.37  |       | 0.41  |       |      |       | 0.22  |       |       |       |       |      |      |       |      |       |     |     |     |     |       |      |     |       |      |      | 100  | 83    |              |
| S11    | 1    | 10       | Ap        |        |       |       |       |      | 0.38  | 48.91 | 1.45  |       | 36.17 | 2.83  | 8.57 |      |       |      |       |     |     |     |     |       |      |     |       | 1.69 |      | 100  | 108   |              |
| S11    | 2    | 1        | Qz        | 100.00 |       |       |       |      |       |       |       |       |       |       |      |      |       |      |       |     |     |     |     |       |      |     |       |      |      | 100  | 118   |              |
| S11    | 2    | 2        | Qz+       | 91.98  |       | 4.14  | 1.38  |      | 0.68  | 1.09  |       | 0.73  |       |       |      |      |       |      |       |     |     |     |     |       |      |     |       |      |      | 100  | 78    |              |
| S11    | 2    | 3        | Cal+Qz    | 12.23  |       |       |       |      |       | 87.77 |       |       |       |       |      |      |       |      |       |     |     |     |     |       |      |     |       |      |      | 100  | 61    |              |
| S11    | 2    | 4        | Cal       |        |       |       |       |      |       | 56.00 |       |       |       |       |      |      |       |      |       |     |     |     |     |       |      |     |       |      |      | 56   | 55    |              |
| S11    | 2    | 5        | Qz+       | 97.67  |       | 1.12  |       |      |       | 0.31  | 0.89  |       |       |       |      |      |       |      |       |     |     |     |     |       |      |     |       |      |      | 100  | 121   |              |
| S11    | 2    | 6        | Py+       | 14.53  |       | 5.20  | 31.90 |      |       | 0.37  | 3.08  | 0.20  |       | 44.71 |      |      |       |      |       |     |     |     |     |       |      |     |       |      |      | 100  | 190   |              |
| S11    | 2    | 7        | Grt (Alm) | 39.73  |       | 21.00 | 29.01 | 4.48 | 2.67  | 3.10  |       |       |       |       |      |      |       |      |       |     |     |     |     |       |      |     |       |      |      | 100  | 111   |              |
| S11    | 2    | 8        | Mix       | 42.19  | 0.62  | 29.25 | 21.47 |      | 1.24  | 1.48  | 0.36  | 1.95  | 1.21  |       |      | 0.23 |       |      |       |     |     |     |     |       |      |     |       |      |      | 100  | 85    |              |
| S11    | 2    | 9        | Qz+       | 85.02  | 0.38  | 6.92  | 6.74  |      |       | 0.51  |       | 0.43  |       |       |      |      |       |      |       |     |     |     |     |       |      |     |       |      |      | 100  | 111   |              |
| S11    | 2    | 10       | Qz+       | 70.94  | 0.49  | 17.74 | 6.57  |      | 1.10  | 1.76  |       | 1.41  |       |       |      |      |       |      |       |     |     |     |     |       |      |     |       |      |      | 100  | 76    |              |
| S11    | 2    | 11       | Ab        | 69.54  |       | 18.77 |       |      |       |       | 11.69 |       |       |       |      |      |       |      |       |     |     |     |     |       |      |     |       |      |      | 100  | 119   |              |
| S11    | 3    | 1        | Ep        | 38.67  |       | 20.93 | 15.00 |      |       | 22.40 |       |       |       |       |      |      |       |      |       |     |     |     |     |       |      |     |       |      |      | 97   | 88    |              |
| S11    | 3    | 2        | Kfs       | 66.42  |       | 18.24 |       |      |       |       | 2.42  | 12.93 |       |       |      |      |       |      |       |     |     |     |     |       |      |     |       |      |      | 100  | 114   |              |
| S11    | 3    | 3        | Cal+      | 6.48   |       | 3.60  | 1.31  |      |       | 87.46 |       | 0.30  |       | 0.84  |      |      |       |      |       |     |     |     |     |       |      |     |       |      |      | 100  | 59    |              |
| S11    | 3    | 4        | Mix       | 48.36  |       | 13.12 | 22.23 | 0.30 | 13.90 | 1.02  | 0.74  | 0.33  |       |       |      |      |       |      |       |     |     |     |     |       |      |     |       |      |      | 100  | 95    |              |
| S11    | 3    | 5        | Qz        | 100.00 |       |       |       |      |       |       |       |       |       |       |      |      |       |      |       |     |     |     |     |       |      |     |       |      |      | 100  | 119   |              |
| S11    | 3    | 6        | Qz        | 100.00 |       |       |       |      |       |       |       |       |       |       |      |      |       |      |       |     |     |     |     |       |      |     |       |      |      | 100  | 118   |              |
| S11    | 3    | 7        | Chl +     | 29.46  | 0.40  | 23.68 | 39.16 |      | 0.98  | 1.36  | 0.48  | 1.05  | 3.08  |       |      | 0.35 |       |      |       |     |     |     |     |       |      |     |       |      |      | 100  | 88    |              |
| S11    | 3    | 8        | Mix       | 46.58  | 0.49  | 22.54 | 8.65  |      | 1.75  | 15.99 | 0.41  | 2.35  | 0.77  |       |      | 0.48 |       |      |       |     |     |     |     |       |      |     |       |      |      | 100  | 65    |              |
| S11    | 3    | 9        | Sd +      | 4.73   |       | 6.37  | 83.68 |      |       | 2.28  |       |       | 2.95  |       |      |      |       |      |       |     |     |     |     |       |      |     |       |      |      | 100  | 60    |              |
| S11    | 4    | 1        | Qz        | 100.00 |       |       |       |      |       |       |       |       |       |       |      |      |       |      |       |     |     |     |     |       |      |     |       |      |      | 100  | 115   |              |
| S11    | 4    | 2        | Qz        | 99.13  |       | 0.73  |       |      |       | 0.14  |       |       |       |       |      |      |       |      |       |     |     |     |     |       |      |     |       |      |      | 100  | 104   |              |
| S11    | 4    | 3        | Cal       |        |       |       |       |      |       | 55.52 |       |       |       | 0.48  |      |      |       |      |       |     |     |     |     |       |      |     |       |      |      | 56   | 55    |              |
| S11    | 4    | 4        | Qz        | 100.00 |       |       |       |      |       |       |       |       |       |       |      |      |       |      |       |     |     |     |     |       |      |     |       |      |      | 100  | 116   |              |
| S11    | 4    | 5        | Qz        | 98.62  |       | 0.76  | 0.42  |      |       |       |       | 0.20  |       |       |      |      |       |      |       |     |     |     |     |       |      |     |       |      |      | 100  | 120   |              |
| S11    | 4    | 6        | Ttn+      | 25.07  | 50.66 | 1.81  | 0.90  |      |       | 21.56 |       |       |       |       |      |      |       |      |       |     |     |     |     |       |      |     |       |      |      | 100  | 109   |              |
| S11    | 4    | 7        | "Ilm"     | 0.72   | 89.76 |       | 9.26  |      |       | 0.26  |       |       |       |       |      |      |       |      |       |     |     |     |     |       |      |     |       |      |      | 100  | 102   |              |
| S11    | 4    | 8        | Chl       | 28.43  |       | 15.34 | 25.39 | 0.97 | 14.53 | 0.35  |       |       |       |       |      |      |       |      |       |     |     |     |     |       |      |     |       |      |      | 85   | 87    |              |
| S11    | 4    | 9        | Qz        | 100.00 |       |       |       |      |       |       |       |       |       |       |      |      |       |      |       |     |     |     |     |       |      |     |       |      |      | 100  | 113   |              |
| S11    | 4    | 10       | Zrn       | 30.77  |       |       |       |      |       |       |       |       |       |       |      |      |       |      |       |     |     |     |     | 67.92 |      |     | 1.31  |      |      | 100  | 110   |              |
| S11    | 4    | 11       | Qz        | 99.79  |       |       |       |      |       | 0.21  |       |       |       |       |      |      |       |      |       |     |     |     |     |       |      |     |       |      |      | 100  | 100   |              |
| S11    | 4    | 12       | Qz        | 100.00 |       |       |       |      |       |       |       |       |       |       |      |      |       |      |       |     |     |     |     |       |      |     |       |      |      | 100  | 120   |              |
| S11    | 4    | 13       | Feho +    | 10.97  |       | 2.73  | 84.13 |      |       | 0.86  |       | 0.31  | 1.01  |       |      |      |       |      |       |     |     |     |     |       |      |     |       |      |      | 100  | 78    |              |
| S11    | 5    | 1        | Ttn+      | 30.00  | 42.61 | 2.45  | 0.66  |      |       | 24.28 |       |       |       |       |      |      |       |      |       |     |     |     |     |       |      |     |       |      |      | 100  | 109   |              |
| S11    | 5    | 2        | Feho +    | 8.39   |       | 2.12  | 87.60 |      |       | 0.85  |       |       | 1.04  |       |      |      |       |      |       |     |     |     |     |       |      |     |       |      |      | 100  | 77    |              |
| S11    | 5    | 3        | Qz        | 100.00 |       |       |       |      |       |       |       |       |       |       |      |      |       |      |       |     |     |     |     |       |      |     |       |      |      | 100  | 118   |              |

Table A3.1: EDS analyses of sample S11.

| Sample | Site | Position | Mineral     | SiO2   | TiO2  | Al2O3 | FeO   | MnO  | MgO   | CaO   | Na2O | K2O   | P2O5 | SO3   | F | Cl     | Sc2O3 | V2O5 | Cr2O3 | CoO | NiO | CuO | ZnO | As2O3 | ZrO2  | BaO  | Yb2O3 | HfO2 | WO3 | PtO2 | Total | Actual Total |
|--------|------|----------|-------------|--------|-------|-------|-------|------|-------|-------|------|-------|------|-------|---|--------|-------|------|-------|-----|-----|-----|-----|-------|-------|------|-------|------|-----|------|-------|--------------|
| S11    | 5    | 4        | Qz          | 99.37  |       | 0.43  |       |      |       | 0.21  |      |       |      |       |   |        |       |      |       |     |     |     |     |       |       |      |       |      |     | 100  | 101   |              |
| S11    | 5    | 5        | Chl+Feld    | 51.25  | 0.98  | 22.88 | 11.56 | 0.32 | 7.91  | 1.12  |      | 3.72  |      |       |   | 0.24   |       |      |       |     |     |     |     |       |       |      |       |      |     | 100  | 82    |              |
| S11    | 5    | 6        | Qz          | 100.00 |       |       |       |      |       |       |      |       |      |       |   |        |       |      |       |     |     |     |     |       |       |      |       |      |     | 100  | 118   |              |
| S11    | 5    | 7        | Cal         |        |       |       |       |      | 0.36  | 55.64 |      |       |      |       |   |        |       |      |       |     |     |     |     |       |       |      |       |      |     | 56   | 55    |              |
| S11    | 5    | 8        | Feho +      | 6.84   |       | 2.61  | 88.43 | 0.49 |       | 0.75  |      |       | 0.88 |       |   |        |       |      |       |     |     |     |     |       |       |      |       |      |     | 100  | 79    |              |
| S11    | 5    | 9        | Kfs         | 66.23  |       | 17.74 |       |      |       |       | 0.33 | 15.69 |      |       |   |        |       |      |       |     |     |     |     |       |       |      |       |      |     | 100  | 117   |              |
| S11    | 5    | 10       | Mix         | 47.71  | 2.64  | 29.17 | 14.91 |      | 1.21  | 1.75  |      | 1.49  | 0.90 |       |   | 0.23   |       |      |       |     |     |     |     |       |       |      |       |      |     | 100  | 79    |              |
| S11    | 6    | 1        | Cal         |        |       |       |       |      | 0.40  | 53.47 |      |       |      | 2.12  |   |        |       |      |       |     |     |     |     |       |       |      |       |      |     | 56   | 55    |              |
| S11    | 6    | 2        | Qz          | 100.00 |       |       |       |      |       |       |      |       |      |       |   |        |       |      |       |     |     |     |     |       |       |      |       |      |     | 100  | 115   |              |
| S11    | 6    | 3        | Kfs         | 66.26  |       | 17.77 |       |      |       |       | 0.59 | 15.39 |      |       |   |        |       |      |       |     |     |     |     |       |       |      |       |      |     | 100  | 113   |              |
| S11    | 6    | 4        | Qz          | 100.00 |       |       |       |      |       |       |      |       |      |       |   |        |       |      |       |     |     |     |     |       |       |      |       |      |     | 100  | 115   |              |
| S11    | 6    | 5        | Mix         | 73.65  | 0.42  | 15.80 | 7.13  |      | 0.64  | 0.59  | 0.27 | 0.79  | 0.70 |       |   |        |       |      |       |     |     |     |     |       |       |      |       |      |     | 100  | 102   |              |
| S11    | 6    | 6        | Grt (Alm)   | 40.47  | 0.71  | 19.87 | 36.09 |      |       | 0.71  |      | 0.54  | 1.61 |       |   |        |       |      |       |     |     |     |     |       |       |      |       |      |     | 100  | 85    |              |
| S11    | 6    | 7        | Zrn         | 31.18  |       |       |       |      |       |       |      |       |      |       |   |        |       |      |       |     |     |     |     |       | 68.82 |      |       |      |     | 100  | 115   |              |
| S11    | 7    | 1        | Mix         | 8.05   | 1.03  | 6.44  | 79.68 |      | 0.57  | 1.47  |      | 0.51  | 2.24 |       |   |        |       |      |       |     |     |     |     |       |       |      |       |      |     | 100  | 81    |              |
| S11    | 7    | 2        | Cal         |        |       |       |       |      |       | 56.00 |      |       |      |       |   |        |       |      |       |     |     |     |     |       |       |      |       |      |     | 56   | 56    |              |
| S11    | 7    | 3        | Qz          | 100.00 |       |       |       |      |       |       |      |       |      |       |   |        |       |      |       |     |     |     |     |       |       |      |       |      |     | 100  | 96    |              |
| S11    | 7    | 4        | Qz          | 100.00 |       |       |       |      |       |       |      |       |      |       |   |        |       |      |       |     |     |     |     |       |       |      |       |      |     | 100  | 115   |              |
| S11    | 7    | 5        | Qz+         | 92.57  |       | 4.86  | 0.60  |      | 0.68  |       |      | 1.29  |      |       |   |        |       |      |       |     |     |     |     |       |       |      |       |      |     | 100  | 104   |              |
| S11    | 7    | 6        | Qz          | 100.00 |       |       |       |      |       |       |      |       |      |       |   |        |       |      |       |     |     |     |     |       |       |      |       |      |     | 100  | 120   |              |
| S11    | 7    | 7        | Py          | 0.81   |       | 0.29  | 28.15 |      |       | 0.14  |      |       |      | 70.61 |   |        |       |      |       |     |     |     |     |       |       |      |       |      |     | 100  | 222   |              |
| S11    | 7    | 8        | Kfs         | 65.50  |       | 17.99 |       |      |       |       | 0.56 | 15.17 |      |       |   |        |       |      |       |     |     |     |     |       |       | 0.78 |       |      |     | 100  | 112   |              |
| S11    | 7    | 9        | Qz          | 100.00 |       |       |       |      |       |       |      |       |      |       |   |        |       |      |       |     |     |     |     |       |       |      |       |      |     | 100  | 112   |              |
| S11    | 7    | 10       | Qz          | 98.64  |       | 0.94  | 0.25  |      |       |       |      | 0.17  |      |       |   |        |       |      |       |     |     |     |     |       |       |      |       |      |     | 100  | 110   |              |
| S11    | 8    | 1        | Spl +       | 2.89   |       | 39.58 | 15.88 |      | 14.76 |       |      |       |      |       |   |        |       |      | 26.89 |     |     |     |     |       |       |      |       |      |     | 100  | 102   |              |
| S11    | 8    | 2        | Grt (Alm)   | 40.46  |       | 21.61 | 27.14 | 1.11 | 4.14  | 5.55  |      |       |      |       |   |        |       |      |       |     |     |     |     |       |       |      |       |      |     | 100  | 111   |              |
| S11    | 8    | 3        | Qz          | 99.61  |       | 0.39  |       |      |       |       |      |       |      |       |   |        |       |      |       |     |     |     |     |       |       |      |       |      |     | 100  | 115   |              |
| S11    | 8    | 4        | Cal         |        |       |       |       |      | 1.13  | 54.87 |      |       |      |       |   |        |       |      |       |     |     |     |     |       |       |      |       |      |     | 56   | 57    |              |
| S11    | 8    | 5        | Cal + Chl + | 5.53   |       | 1.77  | 0.95  |      |       | 90.70 |      | 1.04  |      |       |   |        |       |      |       |     |     |     |     |       |       |      |       |      |     | 100  | 58    |              |
| S11    | 8    | 6        | Qz          | 100.00 |       |       |       |      |       |       |      |       |      |       |   |        |       |      |       |     |     |     |     |       |       |      |       |      |     | 100  | 117   |              |
| S11    | 8    | 7        | Mix         |        |       |       | 16.15 |      | 2.34  | 60.75 | 2.18 |       |      | 18.58 |   |        |       |      |       |     |     |     |     |       |       |      |       |      |     | 100  | 12    |              |
| S11    | 8    | 8        | Cal         | 0.44   |       |       |       |      |       | 53.70 |      |       |      | 1.86  |   |        |       |      |       |     |     |     |     |       |       |      |       |      |     | 56   | 55    |              |
| S11    | 8    | 9        | Hole        |        |       |       |       |      |       |       |      |       |      |       |   | 100.00 |       |      |       |     |     |     |     |       |       |      |       |      |     | 100  | 1     |              |
| S11    | 8    | 10       | Cal         |        |       |       |       |      | 0.33  | 55.67 |      |       |      |       |   |        |       |      |       |     |     |     |     |       |       |      |       |      |     | 56   | 55    |              |
| S11    | 8    | 11       | Pl (Ads)    | 61.01  |       | 24.69 |       |      |       | 6.58  | 7.71 |       |      |       |   |        |       |      |       |     |     |     |     |       |       |      |       |      |     | 100  | 120   |              |
| S11    | 8    | 12       | Qz          | 100.00 |       |       |       |      |       |       |      |       |      |       |   |        |       |      |       |     |     |     |     |       |       |      |       |      |     | 100  | 123   |              |
| S11    | 8    | 13       | Tur         | 38.45  | 0.71  | 30.91 | 5.28  |      | 8.40  | 0.95  | 2.29 |       |      |       |   |        |       |      |       |     |     |     |     |       |       |      |       |      |     | 87   | 100   |              |
| S11    | 9    | 1        | Cal         |        |       |       |       |      | 0.38  | 55.62 |      |       |      |       |   |        |       |      |       |     |     |     |     |       |       |      |       |      |     | 56   | 54    |              |
| S11    | 9    | 2        | Qz          | 100.00 |       |       |       |      |       |       |      |       |      |       |   |        |       |      |       |     |     |     |     |       |       |      |       |      |     | 100  | 117   |              |
| S11    | 9    | 3        | Cal+        | 4.00   |       | 1.43  |       |      |       | 90.93 |      |       | 2.83 | 0.81  |   |        |       |      |       |     |     |     |     |       |       |      |       |      |     | 100  | 58    |              |
| S11    | 9    | 4        | Chl + Cal   | 38.98  |       | 15.26 | 33.48 | 0.60 | 6.75  | 3.10  | 0.72 | 0.25  | 0.88 |       |   |        |       |      |       |     |     |     |     |       |       |      |       |      |     | 100  | 94    |              |
| S11    | 9    | 5        | TiO2        | 0.53   | 99.47 |       |       |      |       |       |      |       |      |       |   |        |       |      |       |     |     |     |     |       |       |      |       |      |     | 100  | 106   |              |
| S11    | 9    | 6        | Qz+         | 96.75  |       | 2.06  |       |      |       |       | 0.47 | 0.72  |      |       |   |        |       |      |       |     |     |     |     |       |       |      |       |      |     | 100  | 117   |              |
| S11    | 9    | 7        | Cal         |        |       |       |       |      | 0.64  | 55.36 |      |       |      |       |   |        |       |      |       |     |     |     |     |       |       |      |       |      |     | 56   | 57    |              |
| S11    | 9    | 8        | Mix         | 45.29  | 1.18  | 19.11 | 29.03 |      | 1.82  | 1.19  |      | 0.51  | 1.88 |       |   |        |       |      |       |     |     |     |     |       |       |      |       |      |     | 100  | 83    |              |
| S11    | 9    | 9        | TiO2 +      | 7.37   | 90.25 | 0.96  | 0.38  |      |       | 0.45  |      | 0.59  |      |       |   |        |       |      |       |     |     |     |     |       |       |      |       |      |     | 100  | 107   |              |

Table A3.1: EDS analyses of sample S11.

| Sample | Site | Position | Mineral     | SiO2   | TiO2  | Al2O3 | FeO   | MnO   | MgO   | CaO   | Na2O | K2O   | P2O5 | SO3   | F | Cl | Sc2O3 | V2O5 | Cr2O3 | CoO   | NiO | CuO | ZnO | As2O3 | ZrO2  | BaO   | Yb2O3 | HfO2 | WO3 | PtO2 | Total | Actual Total |     |     |    |
|--------|------|----------|-------------|--------|-------|-------|-------|-------|-------|-------|------|-------|------|-------|---|----|-------|------|-------|-------|-----|-----|-----|-------|-------|-------|-------|------|-----|------|-------|--------------|-----|-----|----|
| S11    | 9    | 10       | Cal         |        |       |       |       |       |       | 56.00 |      |       |      |       |   |    |       |      |       |       |     |     |     |       |       |       |       |      |     |      | 56    | 58           |     |     |    |
| S11    | 10   | 1        | Zrn         | 30.73  |       | 0.95  | 0.42  |       |       | 0.80  |      |       |      |       |   |    | 0.48  |      |       |       |     |     |     |       | 65.12 |       |       | 1.51 |     |      |       | 100          | 106 |     |    |
| S11    | 10   | 2        | Sd          | 0.91   |       |       | 54.65 |       |       | 0.44  |      |       |      |       |   |    |       |      |       |       |     |     |     |       |       |       |       |      |     |      |       | 56           | 64  |     |    |
| S11    | 10   | 3        | Qz          | 100.00 |       |       |       |       |       |       |      |       |      |       |   |    |       |      |       |       |     |     |     |       |       |       |       |      |     |      |       | 100          | 109 |     |    |
| S11    | 10   | 4        | Qz          | 98.35  |       | 1.22  | 0.43  |       |       |       |      |       |      |       |   |    |       |      |       |       |     |     |     |       |       |       |       |      |     |      |       | 100          | 112 |     |    |
| S11    | 10   | 5        | Cal         |        |       |       |       |       | 0.30  | 55.70 |      |       |      |       |   |    |       |      |       |       |     |     |     |       |       |       |       |      |     |      |       |              | 56  | 56  |    |
| S11    | 10   | 6        | Ep          | 40.24  |       | 25.94 | 8.07  |       |       | 22.76 |      |       |      |       |   |    |       |      |       |       |     |     |     |       |       |       |       |      |     |      |       |              | 97  | 108 |    |
| S11    | 10   | 7        | Cal         |        |       |       |       |       | 0.30  | 55.17 |      |       |      | 0.54  |   |    |       |      |       |       |     |     |     |       |       |       |       |      |     |      |       |              | 56  | 57  |    |
| S11    | 10   | 8        | Cal         |        |       |       |       |       |       | 55.50 |      |       |      | 0.50  |   |    |       |      |       |       |     |     |     |       |       |       |       |      |     |      |       |              | 56  | 56  |    |
| S11    | 10   | 9        | Qz          | 100.00 |       |       |       |       |       |       |      |       |      |       |   |    |       |      |       |       |     |     |     |       |       |       |       |      |     |      |       |              | 100 | 113 |    |
| S11    | 10   | 10       | Cal+        | 2.18   |       | 0.76  |       |       | 0.64  | 96.42 |      |       |      |       |   |    |       |      |       |       |     |     |     |       |       |       |       |      |     |      |       |              | 100 | 55  |    |
| S11    | 11   | 1        | Brt         | 1.43   |       | 0.74  | 0.53  |       |       | 0.43  |      |       |      | 35.78 |   |    |       |      |       | -0.03 |     |     |     |       |       | 61.11 |       |      |     |      |       |              | 100 | 112 |    |
| S11    | 11   | 2        | Feho +      | 3.26   | 0.73  | 7.15  | 85.03 | 0.66  |       | 0.97  |      |       | 1.88 |       |   |    |       |      | 0.33  |       |     |     |     |       |       |       |       |      |     |      |       |              | 100 | 76  |    |
| S11    | 11   | 3        | Feho +      | 8.97   |       | 2.48  | 80.95 |       | 0.65  | 1.57  |      | 0.37  | 1.04 | 3.97  |   |    |       |      |       |       |     |     |     |       |       |       |       |      |     |      |       |              | 100 | 79  |    |
| S11    | 11   | 4        | Py +        | 1.30   |       |       | 36.30 | 0.42  |       | 0.92  |      |       |      | 59.53 |   |    |       |      |       |       |     |     |     |       |       |       |       |      |     |      | 1.53  | 100          | 160 |     |    |
| S11    | 11   | 5        | Ep          | 40.42  |       | 27.15 | 6.80  |       |       | 22.63 |      |       |      |       |   |    |       |      |       |       |     |     |     |       |       |       |       |      |     |      |       |              | 97  | 106 |    |
| S11    | 11   | 6        | Cal         |        |       |       |       |       | 0.31  | 55.23 |      |       |      | 0.46  |   |    |       |      |       |       |     |     |     |       |       |       |       |      |     |      |       |              | 56  | 54  |    |
| S11    | 11   | 7        | Kfs         | 66.41  |       | 17.84 |       |       |       |       | 0.73 | 15.02 |      |       |   |    |       |      |       |       |     |     |     |       |       |       |       |      |     |      |       |              | 100 | 115 |    |
| S11    | 11   | 8        | Qz + Feho + | 52.86  | 0.54  | 1.05  | 43.20 |       |       | 0.97  |      |       | 1.39 |       |   |    |       |      |       |       |     |     |     |       |       |       |       |      |     |      |       |              | 100 | 87  |    |
| S11    | 11   | 9        | Cal         |        |       |       |       |       |       | 56.00 |      |       |      |       |   |    |       |      |       |       |     |     |     |       |       |       |       |      |     |      |       |              | 56  | 57  |    |
| S11    | 12   | 1        | Grt (Spes?) | 39.50  |       | 20.90 | 19.46 | 13.78 | 1.33  | 5.05  |      |       |      |       |   |    |       |      |       |       |     |     |     |       |       |       |       |      |     |      |       |              | 100 | 114 |    |
| S11    | 12   | 2        | Feho +      | 3.36   | 3.95  | 2.94  | 88.64 | 0.49  |       | 0.62  |      |       |      |       |   |    |       |      |       |       |     |     |     |       |       |       |       |      |     |      |       |              | 100 | 80  |    |
| S11    | 12   | 3        | TiO2 +      | 3.07   | 94.16 | 0.98  | 0.93  |       |       | 0.32  | 0.53 |       |      |       |   |    |       |      |       |       |     |     |     |       |       |       |       |      |     |      |       |              | 100 | 100 |    |
| S11    | 12   | 4        | Feho +      | 3.21   |       | 1.96  | 91.44 | 0.59  |       | 0.76  |      |       | 2.03 |       |   |    |       |      |       |       |     |     |     |       |       |       |       |      |     |      |       |              | 100 | 81  |    |
| S11    | 12   | 5        | Cal         |        |       |       |       |       | 1.06  | 54.94 |      |       |      |       |   |    |       |      |       |       |     |     |     |       |       |       |       |      |     |      |       |              | 56  | 58  |    |
| S11    | 12   | 6        | Chl         | 29.01  |       | 19.40 | 20.85 |       | 15.20 | 0.39  |      | 0.14  |      |       |   |    |       |      |       |       |     |     |     |       |       |       |       |      |     |      |       |              | 85  | 97  |    |
| S11    | 12   | 7        | Cal         |        |       |       |       |       |       | 56.00 |      |       |      |       |   |    |       |      |       |       |     |     |     |       |       |       |       |      |     |      |       |              |     | 56  | 56 |
| S11    | 12   | 8        | Cal         |        |       |       |       |       | 0.37  | 55.63 |      |       |      |       |   |    |       |      |       |       |     |     |     |       |       |       |       |      |     |      |       |              | 56  | 54  |    |
| S11    | 12   | 9        | Qz          | 100.00 |       |       |       |       |       |       |      |       |      |       |   |    |       |      |       |       |     |     |     |       |       |       |       |      |     |      |       |              | 100 | 120 |    |
| S11    | 12   | 10       | Cal         | 1.08   |       |       |       |       |       | 54.92 |      |       |      |       |   |    |       |      |       |       |     |     |     |       |       |       |       |      |     |      |       |              | 56  | 55  |    |
| S11    | 13   | 1        | Qz          | 100.00 |       |       |       |       |       |       |      |       |      |       |   |    |       |      |       |       |     |     |     |       |       |       |       |      |     |      |       |              | 100 | 89  |    |
| S11    | 13   | 2        | TiO2 +      | 2.22   | 96.53 |       | 1.25  |       |       |       |      |       |      |       |   |    |       |      |       |       |     |     |     |       |       |       |       |      |     |      |       |              | 100 | 106 |    |
| S11    | 13   | 3        | TiO2        |        | 98.14 |       | 1.86  |       |       |       |      |       |      |       |   |    |       |      |       |       |     |     |     |       |       |       |       |      |     |      |       |              | 100 | 105 |    |
| S11    | 13   | 4        | Ttn+        | 31.06  | 25.93 | 5.38  | 17.41 | 0.60  | 4.40  | 15.04 |      | 0.19  |      |       |   |    |       |      |       |       |     |     |     |       |       |       |       |      |     |      |       |              | 100 | 99  |    |
| S11    | 13   | 5        | Grt (Alm)   | 40.15  |       | 21.11 | 29.58 | 0.82  | 3.06  | 5.27  |      |       |      |       |   |    |       |      |       |       |     |     |     |       |       |       |       |      |     |      |       |              | 100 | 109 |    |
| S11    | 13   | 6        | Ttn         | 33.37  | 37.01 | 1.39  | 0.50  |       |       | 27.73 |      |       |      |       |   |    |       |      |       |       |     |     |     |       |       |       |       |      |     |      |       |              | 100 | 109 |    |
| S11    | 13   | 7        | Qz          | 100.00 |       |       |       |       |       |       |      |       |      |       |   |    |       |      |       |       |     |     |     |       |       |       |       |      |     |      |       |              | 100 | 119 |    |
| S11    | 13   | 8        | Qz          | 100.00 |       |       |       |       |       |       |      |       |      |       |   |    |       |      |       |       |     |     |     |       |       |       |       |      |     |      |       |              | 100 | 112 |    |
| S11    | 13   | 9        | Cal         |        |       |       |       |       | 0.74  | 55.26 |      |       |      |       |   |    |       |      |       |       |     |     |     |       |       |       |       |      |     |      |       |              | 56  | 56  |    |
| S11    | 13   | 10       | Pg          | 48.84  |       | 37.34 | 0.60  |       |       |       | 7.26 | 0.97  |      |       |   |    |       |      |       |       |     |     |     |       |       |       |       |      |     |      |       | 95           | 105 |     |    |
| S11    | 13   | 11       | Cal         |        |       |       | 1.01  | 1.19  | 0.90  | 52.91 |      |       |      |       |   |    |       |      |       |       |     |     |     |       |       |       |       |      |     |      |       |              | 56  | 55  |    |
| S11    | 13   | 12       | Mix         | 68.91  | 0.45  | 18.14 | 6.16  |       | 2.09  | 1.88  | 0.64 | 1.73  |      |       |   |    |       |      |       |       |     |     |     |       |       |       |       |      |     |      |       |              | 100 | 95  |    |
| S11    | 13   | 13       | Qz          | 100.00 |       |       |       |       |       |       |      |       |      |       |   |    |       |      |       |       |     |     |     |       |       |       |       |      |     |      |       |              | 100 | 120 |    |
| S11    | 14   | 1        | Qz          | 99.57  | 0.43  |       |       |       |       |       |      |       |      |       |   |    |       |      |       |       |     |     |     |       |       |       |       |      |     |      |       |              | 100 | 117 |    |
| S11    | 14   | 2        | Ilm         |        | 53.68 |       | 43.36 | 2.70  |       | 0.27  |      |       |      |       |   |    |       |      |       |       |     |     |     |       |       |       |       |      |     |      |       |              | 100 | 102 |    |
| S11    | 14   | 3        | Ilm         |        | 52.11 |       | 39.45 | 8.16  |       | 0.28  |      |       |      |       |   |    |       |      |       |       |     |     |     |       |       |       |       |      |     |      |       |              | 100 | 104 |    |



Table A3.1: EDS analyses of sample S11.

| Sample | Site | Position | Mineral   | SiO2   | TiO2  | Al2O3 | FeO   | MnO  | MgO   | CaO   | Na2O  | K2O   | P2O5 | SO3   | F | Cl | Sc2O3 | V2O5 | Cr2O3 | CoO | NiO  | CuO | ZnO | As2O3 | ZrO2  | BaO | Yb2O3 | HfO2 | WO3 | PtO2 | Total | Actual Total |
|--------|------|----------|-----------|--------|-------|-------|-------|------|-------|-------|-------|-------|------|-------|---|----|-------|------|-------|-----|------|-----|-----|-------|-------|-----|-------|------|-----|------|-------|--------------|
| S11    | 14   | 4        | Grt (Alm) | 39.73  |       | 21.23 | 32.27 | 0.26 | 5.09  | 1.41  |       |       |      |       |   |    |       |      |       |     |      |     |     |       |       |     |       |      |     | 100  | 108   |              |
| S11    | 14   | 5        | Chl       | 24.58  |       | 22.26 | 30.69 |      | 7.17  | 0.31  |       |       |      |       |   |    |       |      |       |     |      |     |     |       |       |     |       |      |     | 85   | 95    |              |
| S11    | 14   | 6        | Py        |        |       |       | 28.66 |      |       | 0.18  |       |       |      | 71.16 |   |    |       |      |       |     |      |     |     |       |       |     |       |      |     | 100  | 233   |              |
| S11    | 14   | 7        | Qz        | 100.00 |       |       |       |      |       |       |       |       |      |       |   |    |       |      |       |     |      |     |     |       |       |     |       |      |     | 100  | 102   |              |
| S11    | 14   | 8        | Qz        | 100.00 |       |       |       |      |       |       |       |       |      |       |   |    |       |      |       |     |      |     |     |       |       |     |       |      |     | 100  | 117   |              |
| S11    | 14   | 9        | Chl+      | 31.23  | 0.85  | 26.37 | 36.52 |      | 1.08  | 1.15  |       | 0.76  | 2.03 |       |   |    |       |      |       |     |      |     |     |       |       |     |       |      |     | 100  | 92    |              |
| S11    | 14   | 10       | Chl+      | 39.19  | 0.74  | 28.75 | 26.74 |      | 1.05  | 0.99  |       | 1.17  | 1.37 |       |   |    |       |      |       |     |      |     |     |       |       |     |       |      |     | 100  | 86    |              |
| S11    | 14   | 11       | Cal       |        |       |       |       |      | 0.49  | 55.51 |       |       |      |       |   |    |       |      |       |     |      |     |     |       |       |     |       |      |     | 56   | 55    |              |
| S11    | 14   | 12       | Cal       |        |       |       |       |      |       | 56.00 |       |       |      |       |   |    |       |      |       |     |      |     |     |       |       |     |       |      |     | 56   | 59    |              |
| S11    | 14   | 13       | Mix       | 22.48  | 0.55  | 11.34 | 55.53 | 0.45 | 3.10  | 1.89  | 1.73  | 0.29  | 2.64 |       |   |    |       |      |       |     |      |     |     |       |       |     |       |      |     | 100  | 87    |              |
| S11    | 14   | 14       | Feho +    | 9.16   |       | 8.02  | 77.88 |      | 0.74  | 1.21  |       | 0.25  | 2.73 |       |   |    |       |      |       |     |      |     |     |       |       |     |       |      |     | 100  | 75    |              |
| S11    | 14   | 15       | Ms+Chl +  | 50.94  | 0.68  | 29.74 | 13.84 |      | 0.93  | 0.98  | 0.45  | 2.45  |      |       |   |    |       |      |       |     |      |     |     |       |       |     |       |      |     | 100  | 86    |              |
| S11    | 15   | 1        | Cal       | 0.52   |       |       |       |      | 0.57  | 54.91 |       |       |      |       |   |    |       |      |       |     |      |     |     |       |       |     |       |      |     | 56   | 55    |              |
| S11    | 15   | 2        | Qz        | 100.00 |       |       |       |      |       |       |       |       |      |       |   |    |       |      |       |     |      |     |     |       |       |     |       |      |     | 100  | 104   |              |
| S11    | 15   | 3        | Qz        | 100.00 |       |       |       |      |       |       |       |       |      |       |   |    |       |      |       |     |      |     |     |       |       |     |       |      |     | 100  | 116   |              |
| S11    | 15   | 4        | Grt (Alm) | 40.70  | 0.55  | 14.32 | 39.06 |      | 1.19  | 1.28  |       | 1.48  | 1.43 |       |   |    |       |      |       |     |      |     |     |       |       |     |       |      |     | 100  | 96    |              |
| S11    | 15   | 5        | Ilm       |        | 52.90 |       | 43.22 | 3.88 |       |       |       |       |      |       |   |    |       |      |       |     |      |     |     |       |       |     |       |      |     | 100  | 106   |              |
| S11    | 15   | 6        | Py+       | 4.10   |       | 1.30  | 39.49 |      |       | 2.18  | 0.36  |       | 1.43 | 51.14 |   |    |       |      |       |     |      |     |     |       |       |     |       |      |     | 100  | 147   |              |
| S11    | 15   | 7        | Cal       |        |       |       |       |      |       | 55.25 |       |       |      | 0.75  |   |    |       |      |       |     |      |     |     |       |       |     |       |      |     | 56   | 56    |              |
| S11    | 15   | 8        | Cal       |        |       |       |       |      |       | 56.00 |       |       |      |       |   |    |       |      |       |     |      |     |     |       |       |     |       |      |     | 56   | 57    |              |
| S11    | 15   | 9        | cal       |        |       |       |       |      | 0.50  | 55.50 |       |       |      |       |   |    |       |      |       |     |      |     |     |       |       |     |       |      |     | 56   | 56    |              |
| S11    | 15   | 10       | Opx       | 51.07  |       | 9.99  | 13.99 |      | 21.50 | 2.24  | 0.93  |       |      |       |   |    |       |      | 0.28  |     |      |     |     |       |       |     |       |      |     | 100  | 112   |              |
| S11    | 15   | 11       | Cal       |        |       |       |       |      | 0.71  | 55.29 |       |       |      |       |   |    |       |      |       |     |      |     |     |       |       |     |       |      |     | 56   | 57    |              |
| S11    | 15   | 12       | Qz        | 100.00 |       |       |       |      |       |       |       |       |      |       |   |    |       |      |       |     |      |     |     |       |       |     |       |      |     | 100  | 122   |              |
| S11    | 15   | 13       | Qz+       | 95.96  |       | 1.95  | 0.55  |      | 0.29  | 0.24  | 1.02  |       |      |       |   |    |       |      |       |     |      |     |     |       |       |     |       |      |     | 100  | 121   |              |
| S11    | 15   | 14       | Feho +    | 13.35  |       | 7.20  | 72.76 | 0.34 | 0.90  | 1.36  |       | 0.37  | 1.68 | 0.91  |   |    |       |      |       |     | 1.13 |     |     |       |       |     |       |      | 100 | 79   |       |              |
| S11    | 15   | 15       | Feho +    | 7.96   |       | 7.68  | 82.57 |      |       | 0.79  |       |       | 1.00 |       |   |    |       |      |       |     |      |     |     |       |       |     |       |      |     | 100  | 85    |              |
| S11    | 15   | 16       | Cal       | 0.52   |       |       |       |      |       | 55.48 |       |       |      |       |   |    |       |      |       |     |      |     |     |       |       |     |       |      |     | 56   | 57    |              |
| S11    | 15   | 17       | Qz        | 100.00 |       |       |       |      |       |       |       |       |      |       |   |    |       |      |       |     |      |     |     |       |       |     |       |      |     | 100  | 120   |              |
| S11    | 16   | 1        | Cal       |        |       |       |       |      | 0.44  | 55.56 |       |       |      |       |   |    |       |      |       |     |      |     |     |       |       |     |       |      |     | 56   | 55    |              |
| S11    | 16   | 2        | Qz+       | 94.74  |       | 3.18  |       |      |       |       | 2.08  |       |      |       |   |    |       |      |       |     |      |     |     |       |       |     |       |      |     | 100  | 119   |              |
| S11    | 16   | 3        | Kfs       | 66.16  |       | 17.70 |       |      |       |       | 0.27  | 15.87 |      |       |   |    |       |      |       |     |      |     |     |       |       |     |       |      |     | 100  | 111   |              |
| S11    | 16   | 4        | Ab        | 68.97  |       | 19.11 |       |      |       | 0.50  | 11.41 |       |      |       |   |    |       |      |       |     |      |     |     |       |       |     |       |      |     | 100  | 114   |              |
| S11    | 16   | 5        | Ep        | 40.40  |       | 25.82 | 8.25  |      |       | 22.53 |       |       |      |       |   |    |       |      |       |     |      |     |     |       |       |     |       |      |     | 97   | 105   |              |
| S11    | 16   | 6        | Cal       |        |       |       |       |      | 0.48  | 55.52 |       |       |      |       |   |    |       |      |       |     |      |     |     |       |       |     |       |      |     | 56   | 60    |              |
| S11    | 16   | 7        | Mix       | 39.22  | 0.72  | 12.59 | 6.73  |      | 4.96  | 33.26 | 0.47  | 2.05  |      |       |   |    |       |      |       |     |      |     |     |       |       |     |       |      |     | 100  | 77    |              |
| S11    | 16   | 8        | Cal+      | 20.38  |       | 9.83  | 4.86  |      | 1.66  | 60.43 |       | 0.87  |      | 1.97  |   |    |       |      |       |     |      |     |     |       |       |     |       |      |     | 100  | 69    |              |
| S11    | 16   | 9        | Qz        | 100.00 |       |       |       |      |       |       |       |       |      |       |   |    |       |      |       |     |      |     |     |       |       |     |       |      |     | 100  | 117   |              |
| S11    | 16   | 10       | Qz        | 99.24  |       | 0.52  | 0.24  |      |       |       |       |       |      |       |   |    |       |      |       |     |      |     |     |       |       |     |       |      |     | 100  | 98    |              |
| S11    | 17   | 1        | Grt?      | 39.85  |       | 20.95 | 23.40 | 6.57 | 0.68  | 8.55  |       |       |      |       |   |    |       |      |       |     |      |     |     |       |       |     |       |      |     | 100  | 111   |              |
| S11    | 17   | 2        | Cal       |        |       |       |       |      | 0.44  | 55.56 |       |       |      |       |   |    |       |      |       |     |      |     |     |       |       |     |       |      |     | 56   | 59    |              |
| S11    | 17   | 3        | Zrn       | 32.73  |       |       |       |      |       |       |       |       |      |       |   |    |       |      |       |     |      |     |     |       | 65.39 |     |       | 1.89 |     | 100  | 119   |              |
| S11    | 17   | 4        | Qz        | 100.00 |       |       |       |      |       |       |       |       |      |       |   |    |       |      |       |     |      |     |     |       |       |     |       |      |     | 100  | 119   |              |
| S11    | 17   | 5        | Mix       | 74.25  | 0.58  | 1.01  | 0.64  | 0.74 | 0.64  | 22.14 |       |       |      |       |   |    |       |      |       |     |      |     |     |       |       |     |       |      |     | 100  | 90    |              |
| S11    | 17   | 6        | Kfs       | 66.56  |       | 17.90 |       |      |       |       | 1.60  | 13.93 |      |       |   |    |       |      |       |     |      |     |     |       |       |     |       |      |     | 100  | 115   |              |
| S11    | 17   | 7        | Qz        | 100.00 |       |       |       |      |       |       |       |       |      |       |   |    |       |      |       |     |      |     |     |       |       |     |       |      |     | 100  | 118   |              |

Table A3.1: EDS analyses of sample S11.

| Sample | Site | Position | Mineral    | SiO2   | TiO2  | Al2O3 | FeO   | MnO  | MgO   | CaO   | Na2O | K2O  | P2O5 | SO3  | F   | Cl   | Sc2O3 | V2O5 | Cr2O3 | CoO | NiO | CuO | ZnO | As2O3 | ZrO2  | BaO | Yb2O3 | HfO2 | WO3 | PtO2 | Total | Actual Total |
|--------|------|----------|------------|--------|-------|-------|-------|------|-------|-------|------|------|------|------|-----|------|-------|------|-------|-----|-----|-----|-----|-------|-------|-----|-------|------|-----|------|-------|--------------|
| S11    | 18   | 1        | Ilm +      | 2.95   | 78.00 | 4.21  | 10.61 |      |       | 2.32  | 0.39 |      | 1.53 |      |     |      |       |      |       |     |     |     |     |       |       |     |       |      |     |      | 100   | 93           |
| S11    | 18   | 2        | Qz         | 100.00 |       |       |       |      |       |       |      |      |      |      |     |      |       |      |       |     |     |     |     |       |       |     |       |      |     |      | 100   | 112          |
| S11    | 18   | 3        | Feho+Cal + | 7.68   |       |       | 67.13 | 0.53 |       | 20.07 | 1.21 |      | 2.22 | 0.84 |     | 0.32 |       |      |       |     |     |     |     |       |       |     |       |      |     |      | 100   | 77           |
| S11    | 18   | 4        | Qz         | 100.00 |       |       |       |      |       |       |      |      |      |      |     |      |       |      |       |     |     |     |     |       |       |     |       |      |     |      | 100   | 91           |
| S11    | 18   | 5        | Qz         | 100.00 |       |       |       |      |       |       |      |      |      |      |     |      |       |      |       |     |     |     |     |       |       |     |       |      |     |      | 100   | 117          |
| S11    | 18   | 6        | Mix        | 64.99  |       | 14.43 | 6.35  | 0.22 |       | 14.00 |      |      |      |      |     |      |       |      |       |     |     |     |     |       |       |     |       |      |     |      | 100   | 111          |
| S11    | 18   | 7        | Cal        |        |       |       |       |      | 0.29  | 55.08 |      |      |      | 0.63 |     |      |       |      |       |     |     |     |     |       |       |     |       |      |     |      | 56    | 58           |
| S11    | 18   | 8        | Cal        |        |       |       |       |      | 0.68  | 55.32 |      |      |      |      |     |      |       |      |       |     |     |     |     |       |       |     |       |      |     |      | 56    | 55           |
| S11    | 18   | 9        | Zrn+       | 33.76  |       | 5.77  | 1.70  |      | 0.73  | 1.76  |      | 0.46 |      |      |     |      | 0.89  |      |       |     |     |     |     |       | 54.92 |     |       |      |     |      | 100   | 87           |
| S11    | 19   | 1        | Cal        |        |       |       |       |      | 0.31  | 55.69 |      |      |      |      |     |      |       |      |       |     |     |     |     |       |       |     |       |      |     |      | 56    | 57           |
| S11    | 19   | 2        | Cal        |        |       |       |       |      | 0.7   | 55.3  |      |      |      |      |     |      |       |      |       |     |     |     |     |       |       |     |       |      |     |      | 56    | 59           |
| S11    | 19   | 3        | TiO2 + Qz  | 8.62   | 88.7  | 0.47  | 1.92  |      |       | 0.28  |      |      |      |      |     |      |       |      |       |     |     |     |     |       |       |     |       |      |     |      | 100   | 103          |
| S11    | 19   | 4        | Qz         | 100    |       |       |       |      |       |       |      |      |      |      |     |      |       |      |       |     |     |     |     |       |       |     |       |      |     |      | 100   | 118          |
| S11    | 19   | 5        | Cal        |        |       |       |       |      |       | 56    |      |      |      |      |     |      |       |      |       |     |     |     |     |       |       |     |       |      |     |      | 56    | 56           |
| S11    | 19   | 6        | Cal        |        |       |       |       | 0.27 |       | 55.73 |      |      |      |      |     |      |       |      |       |     |     |     |     |       |       |     |       |      |     |      | 56    | 54           |
| S11    | 19   | 7        | Qz         | 100    |       |       |       |      |       |       |      |      |      |      |     |      |       |      |       |     |     |     |     |       |       |     |       |      |     |      | 100   | 102          |
| S11    | 19   | 8        | Qz         | 100    |       |       |       |      |       |       |      |      |      |      |     |      |       |      |       |     |     |     |     |       |       |     |       |      |     |      | 100   | 118          |
| S11    | 19   | 9        | Mix        | 57.88  | 0.44  | 24    | 6.07  | 0.54 | 1.51  | 3.73  | 2.91 | 1.66 |      | 1.08 |     | 0.21 |       |      |       |     |     |     |     |       |       |     |       |      |     |      | 100   | 85           |
| S11    | 19   | 10       | Qz +       | 97.89  |       | 1.69  |       |      |       |       |      | 0.42 |      |      |     |      |       |      |       |     |     |     |     |       |       |     |       |      |     |      | 100   | 117          |
| S11    | 19   | 11       | Ilm + Chl  | 24.22  | 33.9  | 13.7  | 20.6  | 0.35 | 6.31  | 0.62  |      | 0.23 |      |      |     |      |       |      |       |     |     |     |     |       |       |     |       |      |     |      | 100   | 96           |
| S11    | 19   | 12       | Cal        |        |       |       |       |      |       | 56    |      |      |      |      |     |      |       |      |       |     |     |     |     |       |       |     |       |      |     |      | 56    | 55           |
| S11    | 19   | 13       | Cal +      | 2.94   |       | 1.24  | 0.55  |      | 0.6   | 93.85 |      |      |      | 0.81 |     |      |       |      |       |     |     |     |     |       |       |     |       |      |     |      | 100   | 58           |
| S11    | 19   | 14       | TiO2 +     | 4.39   | 89.5  | 1.81  | 1.85  |      | 1.95  | 0.47  |      |      |      |      |     |      |       |      |       |     |     |     |     |       |       |     |       |      |     |      | 100   | 88           |
| S11    | 20   | 1        | Cal        |        |       |       |       |      | 0.49  | 55.51 |      |      |      |      |     |      |       |      |       |     |     |     |     |       |       |     |       |      |     |      | 56    | 57           |
| S11    | 20   | 2        | Spl        |        |       | 26.5  | 27.3  |      | 10.2  |       |      |      |      |      |     |      |       |      |       |     |     |     |     |       |       |     |       |      |     |      | 100   | 109          |
| S11    | 20   | 3        | Chl +      | 23.88  | 0.33  | 14.5  | 43.4  | 0.73 | 0.54  | 0.992 |      | 1    | 1.71 |      |     |      |       |      |       |     |     |     |     |       |       |     |       |      |     |      | 87    | 85           |
| S11    | 20   | 4        | Feho +     | 18.28  |       | 1.31  | 78.1  |      |       | 0.96  |      |      | 1.34 |      |     |      |       |      |       |     |     |     |     |       |       |     |       |      |     |      | 100   | 81           |
| S11    | 20   | 5        | Qz         | 100    |       |       |       |      |       |       |      |      |      |      |     |      |       |      |       |     |     |     |     |       |       |     |       |      |     |      | 100   | 115          |
| S11    | 20   | 6        | Cal        |        |       |       |       | 0.51 | 55.49 |       |      |      |      |      |     |      |       |      |       |     |     |     |     |       |       |     |       |      |     |      | 56    | 55           |
| S11    | 20   | 7        | Feho +     | 3.83   |       | 2.57  | 90.5  |      |       | 1.62  |      |      | 1.45 |      |     |      |       |      |       |     |     |     |     |       |       |     |       |      |     |      | 100   | 65           |
| S11    | 20   | 8        | Qz         | 100    |       |       |       |      |       |       |      |      |      |      |     |      |       |      |       |     |     |     |     |       |       |     |       |      |     |      | 100   | 116          |
| S11    | 20   | 9        | Pl (Olig)  | 62.51  |       | 23.4  |       |      |       | 5.63  | 8.11 | 0.31 |      |      |     |      |       |      |       |     |     |     |     |       |       |     |       |      |     |      | 100   | 110          |
| S11    | 20   | 10       | Qz         | 100    |       |       |       |      |       |       |      |      |      |      |     |      |       |      |       |     |     |     |     |       |       |     |       |      |     |      | 100   | 115          |
| S11    | 20   | 11       | Qz         | 100    |       |       |       |      |       |       |      |      |      |      |     |      |       |      |       |     |     |     |     |       |       |     |       |      |     |      | 100   | 111          |
| S11    | 20   | 12       | Cal        |        |       |       |       |      |       | 55.38 |      |      |      | 0.62 |     |      |       |      |       |     |     |     |     |       |       |     |       |      |     |      | 56    | 56           |
| S11    | 21   | 1        | Ap         |        |       |       |       | 0.54 | 49.34 | 1.09  |      |      | 38   | 1.8  | 7.5 |      |       |      |       |     |     |     |     |       |       |     |       |      | 2   |      | 100   | 107          |
| S11    | 21   | 2        | Mix        | 73.56  |       | 1.15  |       |      | 4.35  | 7.4   | 13   | 0.57 |      |      |     |      |       |      |       |     |     |     |     |       |       |     |       |      |     |      | 100   | 113          |
| S11    | 21   | 3        | Qz         | 100    |       |       |       |      |       |       |      |      |      |      |     |      |       |      |       |     |     |     |     |       |       |     |       |      |     |      | 100   | 113          |
| S11    | 21   | 4        | Kfs        | 66.05  |       | 18.2  |       |      |       |       | 1.36 | 14.4 |      |      |     |      |       |      |       |     |     |     |     |       |       |     |       |      |     |      | 100   | 109          |
| S11    | 21   | 5        | Cal        |        |       |       |       |      | 0.83  | 55.17 |      |      |      |      |     |      |       |      |       |     |     |     |     |       |       |     |       |      |     |      | 56    | 54           |
| S11    | 21   | 6        | Feho +     | 5.29   |       | 2.12  | 88    |      |       | 1.88  |      |      | 2.68 |      |     |      |       |      |       |     |     |     |     |       |       |     |       |      |     |      | 100   | 82           |
| S11    | 21   | 7        | Mix        | 31.48  | 0.37  | 22    | 40.4  |      | 1.12  | 1.14  | 0.48 | 1.59 | 1.48 |      |     |      |       |      |       |     |     |     |     |       |       |     |       |      |     |      | 100   | 88           |
| S11    | 21   | 8        | Mix        | 48.35  | 0.83  | 29    | 16.3  |      | 1.26  | 1.27  | 0.39 | 1.42 | 1.01 |      |     | 0.18 |       |      |       |     |     |     |     |       |       |     |       |      |     |      | 100   | 91           |
| S11    | 21   | 9        | Cal        |        |       |       |       |      | 0.71  | 55.29 |      |      |      |      |     |      |       |      |       |     |     |     |     |       |       |     |       |      |     |      | 56    | 56           |
| S11    | 21   | 10       | Cal        |        |       |       |       |      |       | 56    |      |      |      |      |     |      |       |      |       |     |     |     |     |       |       |     |       |      |     |      | 56    | 56           |
| S11    | 21   | 11       | Qz         | 99.57  |       |       |       |      |       | 0.43  |      |      |      |      |     |      |       |      |       |     |     |     |     |       |       |     |       |      |     |      | 100   | 115          |

Table A3.1: EDS analyses of sample S11.

| Sample | Site | Position | Mineral   | SiO2  | TiO2 | Al2O3 | FeO  | MnO  | MgO  | CaO   | Na2O | K2O  | P2O5 | SO3  | F | Cl | Sc2O3 | V2O5 | Cr2O3 | CoO | NiO | CuO | ZnO | As2O3 | ZrO2 | BaO  | Yb2O3 | HfO2 | WO3 | PtO2 | Total | Actual Total |
|--------|------|----------|-----------|-------|------|-------|------|------|------|-------|------|------|------|------|---|----|-------|------|-------|-----|-----|-----|-----|-------|------|------|-------|------|-----|------|-------|--------------|
| S11    | 21   | 12       | Ms +      | 48.75 | 5.85 | 29    | 7.63 | 1.27 | 1.78 | 1.94  | 0.4  | 3.35 |      |      |   |    |       |      |       |     |     |     |     |       |      |      |       |      |     | 100  | 79    |              |
| S11    | 22   | 1        | "Ilm" +   | 6.31  | 81   | 3.24  | 6.18 |      | 0.56 | 1.71  |      |      | 0.95 |      |   |    |       |      |       |     |     |     |     |       |      |      |       |      |     | 100  | 89    |              |
| S11    | 22   | 2        | Qz        | 100   |      |       |      |      |      |       |      |      |      |      |   |    |       |      |       |     |     |     |     |       |      |      |       |      |     | 100  | 112   |              |
| S11    | 22   | 3        | Kfs       | 66.27 |      | 17.6  |      |      |      |       | 0.76 | 15.4 |      |      |   |    |       |      |       |     |     |     |     |       |      |      |       |      |     | 100  | 112   |              |
| S11    | 22   | 4        | Cal       |       |      |       |      |      | 1.02 | 54.98 |      |      |      |      |   |    |       |      |       |     |     |     |     |       |      |      |       |      |     | 56   | 54    |              |
| S11    | 22   | 5        | Cal       | 1.288 |      |       |      |      | 0.54 | 54.17 |      |      |      |      |   |    |       |      |       |     |     |     |     |       |      |      |       |      |     | 56   | 53    |              |
| S11    | 22   | 6        | Cal       |       |      |       |      |      | 4.02 | 51.98 |      |      |      |      |   |    |       |      |       |     |     |     |     |       |      |      |       |      |     | 56   | 54    |              |
| S11    | 22   | 7        | Qz        | 100   |      |       |      |      |      |       |      |      |      |      |   |    |       |      |       |     |     |     |     |       |      |      |       |      |     | 100  | 111   |              |
| S11    | 22   | 8        | Cal       |       |      |       |      |      | 0.42 | 55.58 |      |      |      |      |   |    |       |      |       |     |     |     |     |       |      |      |       |      |     | 56   | 53    |              |
| S11    | 22   | 9        | Qz        | 100   |      |       |      |      |      |       |      |      |      |      |   |    |       |      |       |     |     |     |     |       |      |      |       |      |     | 100  | 111   |              |
| S11    | 22   | 10       | Qz        | 100   |      |       |      |      |      |       |      |      |      |      |   |    |       |      |       |     |     |     |     |       |      |      |       |      |     | 100  | 109   |              |
| S11    | 22   | 11       | Cal       | 1.042 |      |       |      |      |      | 54.96 |      |      |      |      |   |    |       |      |       |     |     |     |     |       |      |      |       |      |     | 56   | 51    |              |
| S11    | 22   | 12       | Cal       |       |      |       |      |      |      | 56    |      |      |      |      |   |    |       |      |       |     |     |     |     |       |      |      |       |      |     | 56   | 54    |              |
| S11    | 22   | 13       | Kfs       | 65.91 |      | 17.8  |      |      |      |       | 0.36 | 16   |      |      |   |    |       |      |       |     |     |     |     |       |      |      |       |      |     | 100  | 109   |              |
| S11    | 22   | 14       | Feho +    | 5.62  |      | 4.21  | 87.5 |      | 0.76 | 0.66  |      |      | 1.23 |      |   |    |       |      |       |     |     |     |     |       |      |      |       |      |     | 100  | 72    |              |
| S11    | 22   | 15       | Ab        | 68.83 |      | 19.1  |      |      |      | 0.72  | 11.2 | 0.15 |      |      |   |    |       |      |       |     |     |     |     |       |      |      |       |      |     | 100  | 113   |              |
| S11    | 23   | 1        | Ep        | 40.21 |      | 24.2  | 9.6  |      |      | 22.95 |      |      |      |      |   |    |       |      |       |     |     |     |     |       |      |      |       |      |     | 97   | 104   |              |
| S11    | 23   | 2        | Crn       | 0.33  |      | 96.1  | 0.18 | 0.32 | 0.71 |       |      |      |      |      |   |    |       |      |       |     |     | 2.4 |     |       |      |      |       |      |     | 100  | 173   |              |
| S11    | 23   | 3        | Cal       |       |      |       |      | 0.37 | 0.4  | 55.23 |      |      |      |      |   |    |       |      |       |     |     |     |     |       |      |      |       |      |     | 56   | 53    |              |
| S11    | 23   | 4        | Cal       |       |      |       |      |      | 0.47 | 55.53 |      |      |      |      |   |    |       |      |       |     |     |     |     |       |      |      |       |      |     | 56   | 55    |              |
| S11    | 23   | 5        | Qz        | 100   |      |       |      |      |      |       |      |      |      |      |   |    |       |      |       |     |     |     |     |       |      |      |       |      |     | 100  | 116   |              |
| S11    | 23   | 6        | Bt        | 42.45 | 2.91 | 20    | 14.8 |      | 7.93 |       | 0.34 | 7.59 |      |      |   |    |       |      |       |     |     |     |     |       |      |      |       |      |     | 96   | 99    |              |
| S11    | 23   | 7        | Kln +     | 46.37 | 1    | 30.3  | 4.34 |      | 0.97 | 0.8   | 0.27 | 1.42 |      | 0.58 |   |    |       |      |       |     |     |     |     |       |      |      |       |      |     | 86   | 84    |              |
| S11    | 23   | 8        | Kfs       | 63.46 |      | 19.4  |      |      |      |       | 2.43 | 11.2 |      |      |   |    |       |      |       |     |     |     |     |       |      | 3.58 |       |      |     | 100  | 109   |              |
| S11    | 23   | 9        | Qz        | 100   |      |       |      |      |      |       |      |      |      |      |   |    |       |      |       |     |     |     |     |       |      |      |       |      |     | 100  | 116   |              |
| S11    | 23   | 10       | Grt (Alm) | 37.1  | 1.63 | 23.7  | 29.5 |      | 1.79 | 3.81  |      | 1.47 | 0.99 |      |   |    |       |      |       |     |     |     |     |       |      |      |       |      |     | 100  | 83    |              |
| S11    | 23   | 11       | Cal       |       |      |       |      |      |      | 56    |      |      |      |      |   |    |       |      |       |     |     |     |     |       |      |      |       |      |     | 56   | 56    |              |
| S11    | 23   | 12       | Cal +     | 8.38  |      | 4.58  | 1.26 |      | 0.76 | 83.83 |      | 0.4  |      | 0.79 |   |    |       |      |       |     |     |     |     |       |      |      |       |      |     | 100  | 59    |              |
| S11    | 23   | 13       | Ttn       | 40.7  | 24.8 | 9.46  | 3.41 |      | 1.25 | 19.63 |      | 0.79 |      |      |   |    |       |      |       |     |     |     |     |       |      |      |       |      |     | 100  | 91    |              |
| S11    | 23   | 14       | Ttn +     | 33.18 | 16.3 | 10.5  | 14.4 | 0.3  | 18.6 | 6.05  |      |      |      |      |   |    |       | 0.7  |       |     |     |     |     |       |      |      |       |      |     | 100  | 101   |              |
| S11    | 24   | 1        | Qz        | 100   |      |       |      |      |      |       |      |      |      |      |   |    |       |      |       |     |     |     |     |       |      |      |       |      |     | 100  | 104   |              |
| S11    | 24   | 2        | Qz        | 100   |      |       |      |      |      |       |      |      |      |      |   |    |       |      |       |     |     |     |     |       |      |      |       |      |     | 100  | 120   |              |
| S11    | 24   | 3        | Cal       |       |      |       |      |      | 0.76 | 55.24 |      |      |      |      |   |    |       |      |       |     |     |     |     |       |      |      |       |      |     | 56   | 58    |              |
| S11    | 24   | 4        | Mix       | 44.5  | 12.6 | 21.7  | 15.9 | 0.43 | 1.82 | 1.68  |      | 1.4  |      |      |   |    |       |      |       |     |     |     |     |       |      |      |       |      |     | 100  | 91    |              |
| S11    | 24   | 5        | "Ilm"     | 0.94  | 74.6 | 0.99  | 22.5 | 0.52 |      | 0.46  |      |      |      |      |   |    |       |      |       |     |     |     |     |       |      |      |       |      |     | 100  | 92    |              |
| S11    | 24   | 6        | Zrn       | 31.12 |      |       |      |      |      |       |      |      |      |      |   |    |       |      |       |     |     |     |     |       | 68.9 |      |       |      |     | 100  | 112   |              |
| S11    | 24   | 7        | Mix       | 56.83 |      | 13.1  | 23.6 |      | 1.65 | 1.23  | 0.41 | 1.45 | 1.78 |      |   |    |       |      |       |     |     |     |     |       |      |      |       |      |     | 100  | 83    |              |
| S11    | 24   | 8        | Cal       |       |      |       |      |      |      | 56    |      |      |      |      |   |    |       |      |       |     |     |     |     |       |      |      |       |      |     | 56   | 52    |              |
| S11    | 24   | 9        | Cal       |       |      |       |      |      | 0.7  | 55.3  |      |      |      |      |   |    |       |      |       |     |     |     |     |       |      |      |       |      |     | 56   | 53    |              |
| S11    | 24   | 10       | Kfs       | 65.65 |      | 17.9  |      |      |      |       | 0.38 | 15.3 |      |      |   |    |       |      |       |     |     |     |     |       |      | 0.8  |       |      |     | 100  | 111   |              |
| S11    | 24   | 11       | Cal       | 1.68  |      | 0.59  |      |      | 0.34 | 52.75 |      |      |      | 0.64 |   |    |       |      |       |     |     |     |     |       |      |      |       |      |     | 56   | 57    |              |
| S11    | 24   | 12       | Qz        | 100   |      |       |      |      |      |       |      |      |      |      |   |    |       |      |       |     |     |     |     |       |      |      |       |      |     | 100  | 117   |              |
| S11    | 24   | 13       | Ep        | 40.33 |      | 25.2  | 9.08 |      |      | 22.34 |      |      |      |      |   |    |       |      |       |     |     |     |     |       |      |      |       |      |     | 97   | 108   |              |
| S11    | 24   | 14       | Qz        | 100   |      |       |      |      |      |       |      |      |      |      |   |    |       |      |       |     |     |     |     |       |      |      |       |      |     | 100  | 114   |              |
| S11    | 24   | 15       | Cal       | 0.823 |      |       |      |      | 0.3  | 54.76 |      | 0.11 |      |      |   |    |       |      |       |     |     |     |     |       |      |      |       |      |     | 56   | 55    |              |
| S11    | 24   | 16       | Qz        | 99.86 |      |       |      |      |      |       |      |      |      |      |   |    |       |      |       |     |     |     |     |       |      |      | 0.14  |      |     | 100  | 116   |              |

Table A3.1: EDS analyses of sample S11.

| Sample | Site | Position | Mineral   | SiO2  | TiO2 | Al2O3 | FeO  | MnO  | MgO  | CaO   | Na2O | K2O  | P2O5 | SO3  | F | Cl   | Sc2O3 | V2O5 | Cr2O3 | CoO | NiO | CuO | ZnO | As2O3 | ZrO2 | BaO  | Yb2O3 | HfO2 | WO3 | PtO2 | Total | Actual Total |
|--------|------|----------|-----------|-------|------|-------|------|------|------|-------|------|------|------|------|---|------|-------|------|-------|-----|-----|-----|-----|-------|------|------|-------|------|-----|------|-------|--------------|
| S11    | 24   | 17       | Ttn       | 32.85 | 38   | 0.89  | 0.31 |      |      | 27.96 |      |      |      |      |   |      |       |      |       |     |     |     |     |       |      |      |       |      |     | 100  | 103   |              |
| S11    | 24   | 18       | Qz        | 100   |      |       |      |      |      |       |      |      |      |      |   |      |       |      |       |     |     |     |     |       |      |      |       |      |     | 100  | 114   |              |
| S11    | 25   | 1        | Lm +      | 18.21 |      | 1.74  | 78.6 |      |      | 0.42  |      |      | 1.02 |      |   |      |       |      |       |     |     |     |     |       |      |      |       |      |     | 100  | 80    |              |
| S11    | 25   | 2        | Qz        | 100   |      |       |      |      |      |       |      |      |      |      |   |      |       |      |       |     |     |     |     |       |      |      |       |      |     | 100  | 115   |              |
| S11    | 25   | 3        | Kfs       | 66.34 |      | 17.7  |      |      |      |       | 1.36 | 14.6 |      |      |   |      |       |      |       |     |     |     |     |       |      |      |       |      |     | 100  | 112   |              |
| S11    | 25   | 4        | Cal       |       |      |       |      |      |      | 56    |      |      |      |      |   |      |       |      |       |     |     |     |     |       |      |      |       |      |     | 56   | 55    |              |
| S11    | 25   | 5        | Cal       |       |      |       |      |      |      | 56    |      |      |      |      |   |      |       |      |       |     |     |     |     |       |      |      |       |      |     | 56   | 58    |              |
| S11    | 25   | 6        | Cal +     | 13.23 |      | 1.7   | 0.95 |      |      | 83.82 |      | 0.3  |      |      |   |      |       |      |       |     |     |     |     |       |      |      |       |      |     | 100  | 58    |              |
| S11    | 25   | 7        | Cal       |       |      |       |      |      | 0.5  | 55.5  |      |      |      |      |   |      |       |      |       |     |     |     |     |       |      |      |       |      |     | 56   | 56    |              |
| S11    | 25   | 8        | Kfs +     | 70.03 |      | 16.2  |      |      |      |       | 1.08 | 12.7 |      |      |   |      |       |      |       |     |     |     |     |       |      |      |       |      |     | 100  | 115   |              |
| S11    | 25   | 9        | Grt (Alm) | 36.7  | 0.93 | 15.9  | 32.1 |      | 10.3 | 1.83  | 0.51 | 1.03 | 0.77 |      |   |      |       |      |       |     |     |     |     |       |      |      |       |      |     | 100  | 89    |              |
| S11    | 25   | 10       | Qz        | 99.78 |      |       | 0.22 |      |      |       |      |      |      |      |   |      |       |      |       |     |     |     |     |       |      |      |       |      |     | 100  | 118   |              |
| S11    | 25   | 11       | Cal       |       |      |       |      |      | 0.68 | 55.32 |      |      |      |      |   |      |       |      |       |     |     |     |     |       |      |      |       |      |     | 56   | 56    |              |
| S11    | 25   | 12       | Qz        | 100   |      |       |      |      |      |       |      |      |      |      |   |      |       |      |       |     |     |     |     |       |      |      |       |      |     | 100  | 121   |              |
| S11    | 25   | 13       | Grt (Alm) | 34.47 | 0.92 | 22.9  | 37.2 |      | 0.98 | 1.05  |      | 1.23 | 1.32 |      |   |      |       |      |       |     |     |     |     |       |      |      |       |      |     | 100  | 90    |              |
| S11    | 25   | 14       | Qz        | 100   |      |       |      |      |      |       |      |      |      |      |   |      |       |      |       |     |     |     |     |       |      |      |       |      |     | 100  | 119   |              |
| S11    | 25   | 15       | Cal       |       |      |       | 0.28 |      |      | 55.72 |      |      |      |      |   |      |       |      |       |     |     |     |     |       |      |      |       |      |     | 56   | 56    |              |
| S11    | 25   | 16       | Qz        | 100   |      |       |      |      |      |       |      |      |      |      |   |      |       |      |       |     |     |     |     |       |      |      |       |      |     | 100  | 113   |              |
| S11    | 25   | 17       | Qz        | 96.89 |      | 1.32  | 1.3  |      |      | 0.33  |      | 0.16 |      |      |   |      |       |      |       |     |     |     |     |       |      |      |       |      |     | 100  | 106   |              |
| S11    | 25   | 18       | Mix       | 35.41 |      | 4.86  | 7.75 |      |      | 43.31 |      |      |      | 8.66 |   |      |       |      |       |     |     |     |     |       |      |      |       |      |     | 100  | 7     |              |
| S11    | 26   | 1        | Qz        | 100   |      |       |      |      |      |       |      |      |      |      |   |      |       |      |       |     |     |     |     |       |      |      |       |      |     | 100  | 119   |              |
| S11    | 26   | 2        | Ttn       | 33.46 | 35.5 | 2.55  | 0.91 |      |      | 27.56 |      |      |      |      |   |      |       |      |       |     |     |     |     |       |      |      |       |      |     | 100  | 105   |              |
| S11    | 26   | 3        | Cal       |       |      |       |      |      |      | 55.51 |      |      | 0.49 |      |   |      |       |      |       |     |     |     |     |       |      |      |       |      |     | 56   | 57    |              |
| S11    | 26   | 4        | Cal       |       |      |       |      |      |      | 56    |      |      |      |      |   |      |       |      |       |     |     |     |     |       |      |      |       |      |     | 56   | 55    |              |
| S11    | 26   | 5        | Qz        | 100   |      |       |      |      |      |       |      |      |      |      |   |      |       |      |       |     |     |     |     |       |      |      |       |      |     | 100  | 118   |              |
| S11    | 26   | 6        | Kfs       | 65.98 |      | 18.8  | 0.26 |      |      | 0.87  | 3.28 | 10.9 |      |      |   |      |       |      |       |     |     |     |     |       |      |      |       |      |     | 100  | 118   |              |
| S11    | 26   | 7        | Cal       |       |      |       |      |      |      | 56    |      |      |      |      |   |      |       |      |       |     |     |     |     |       |      |      |       |      |     | 56   | 58    |              |
| S11    | 26   | 8        | Kfs       | 65.86 |      | 17.8  |      |      |      |       | 1    | 14.6 |      |      |   |      |       |      |       |     |     |     |     |       |      | 0.77 |       |      |     | 100  | 117   |              |
| S11    | 26   | 9        | Ep        | 42.65 | 0.72 | 18.6  | 13.1 |      | 1.22 | 20.45 |      | 1.5  | 1.45 |      |   | 0.29 |       |      |       |     |     |     |     |       |      |      |       |      |     | 100  | 66    |              |
| S11    | 26   | 10       | Cal       |       |      |       |      |      |      | 56    |      |      |      |      |   |      |       |      |       |     |     |     |     |       |      |      |       |      |     | 56   | 56    |              |
| S11    | 26   | 11       | Mix       | 46.33 | 0.47 | 22.3  | 4.55 |      | 1.95 | 11.18 | 0.29 | 3.77 | 8.95 |      |   | 0.19 |       |      |       |     |     |     |     |       |      |      |       |      |     | 100  | 89    |              |
| S11    | 26   | 12       | Cal       |       |      |       |      |      |      | 56    |      |      |      |      |   |      |       |      |       |     |     |     |     |       |      |      |       |      |     | 56   | 56    |              |
| S11    | 26   | 13       | Qz        | 100   |      |       |      |      |      |       |      |      |      |      |   |      |       |      |       |     |     |     |     |       |      |      |       |      |     | 100  | 117   |              |
| S11    | 26   | 14       | Mix       | 51.6  |      | 22    | 7.94 |      | 2.02 | 12.83 |      | 2.02 |      |      |   | 1.58 |       |      |       |     |     |     |     |       |      |      |       |      |     | 100  | 20    |              |
| S11    | 26   | 15       | Qz        | 100   |      |       |      |      |      |       |      |      |      |      |   |      |       |      |       |     |     |     |     |       |      |      |       |      |     | 100  | 122   |              |
| S11    | 26   | 16       | Qz        | 99.77 |      |       | 0.23 |      |      |       |      |      |      |      |   |      |       |      |       |     |     |     |     |       |      |      |       |      |     | 100  | 105   |              |
| S11    | 26   | 17       | Qz        | 100   |      |       |      |      |      |       |      |      |      |      |   |      |       |      |       |     |     |     |     |       |      |      |       |      |     | 100  | 122   |              |
| S11    | 26   | 18       | Lm +      | 3.85  |      | 2.46  | 90.1 |      | 0.72 | 1.25  |      |      | 1.63 |      |   |      |       |      |       |     |     |     |     |       |      |      |       |      |     | 100  | 76    |              |
| S11    | 26   | 19       | Cal       | 0.627 |      |       |      |      |      | 54.89 |      |      |      | 0.49 |   |      |       |      |       |     |     |     |     |       |      |      |       |      |     | 56   | 57    |              |
| S11    | 26   | 20       | Kfs       | 65.39 |      | 18.1  | 0.29 |      |      |       | 1.17 | 14.2 |      |      |   |      |       |      |       |     |     |     |     |       |      | 0.86 |       |      |     | 100  | 106   |              |
| S11    | 26   | 21       | Bt        | 41.62 | 2.75 | 18.7  | 16.1 | 0.36 | 8.9  | 0.797 |      | 6.74 |      |      |   |      |       |      |       |     |     |     |     |       |      |      |       |      | 96  | 102  |       |              |
| S11    | 26   | 22       | Cal       |       |      |       |      |      | 0.69 | 55.31 |      |      |      |      |   |      |       |      |       |     |     |     |     |       |      |      |       |      |     | 56   | 56    |              |
| S11    | 26   | 23       | Kfs       | 65.98 |      | 18.4  |      |      |      | 0.63  | 1.51 | 13.5 |      |      |   |      |       |      |       |     |     |     |     |       |      |      |       |      |     | 100  | 116   |              |
| S11    | 27   | 1        | Qz        | 99.72 |      |       | 0.28 |      |      |       |      |      |      |      |   |      |       |      |       |     |     |     |     |       |      |      |       |      |     | 100  | 112   |              |
| S11    | 27   | 2        | Mix       | 9.74  |      | 10.6  | 75.8 |      | 2.23 | 0.61  |      |      | 1.03 |      |   |      |       |      |       |     |     |     |     |       |      |      |       |      |     | 100  | 69    |              |
| S11    | 27   | 3        | Feho +    | 6.1   |      | 2.79  | 86.1 | 1.67 | 1.19 | 0.91  |      |      | 1.27 |      |   |      |       |      |       |     |     |     |     |       |      |      |       |      |     | 100  | 72    |              |



Table A3.1: EDS analyses of sample S11.

| Sample | Site | Position | Mineral     | SiO2  | TiO2 | Al2O3 | FeO  | MnO  | MgO  | CaO   | Na2O | K2O  | P2O5 | SO3  | F   | Cl   | Sc2O3 | V2O5 | Cr2O3 | CoO  | NiO | CuO | ZnO | As2O3 | ZrO2 | BaO | Yb2O3 | HfO2 | WO3 | PtO2 | Total | Actual Total |
|--------|------|----------|-------------|-------|------|-------|------|------|------|-------|------|------|------|------|-----|------|-------|------|-------|------|-----|-----|-----|-------|------|-----|-------|------|-----|------|-------|--------------|
| S11    | 27   | 4        | Chl +       | 31.4  | 3.91 | 13.5  | 37.1 | 0.77 | 11.9 | 1.14  |      | 0.28 |      |      |     |      |       |      |       |      |     |     |     |       |      |     |       |      |     | 100  | 79    |              |
| S11    | 27   | 5        | Qz          | 100   |      |       |      |      |      |       |      |      |      |      |     |      |       |      |       |      |     |     |     |       |      |     |       |      |     | 100  | 122   |              |
| S11    | 27   | 6        | Mix         | 17.36 | 0.43 | 7.96  | 45.7 | 6.77 | 7.91 | 11.1  |      | 1.15 | 1.65 |      |     |      |       |      |       |      |     |     |     |       |      |     |       |      |     | 100  | 65    |              |
| S11    | 27   | 7        | Qz          | 100   |      |       |      |      |      |       |      |      |      |      |     |      |       |      |       |      |     |     |     |       |      |     |       |      |     | 100  | 119   |              |
| S11    | 27   | 8        | Grt (Alm)   | 36.64 |      | 23.3  | 25.6 |      | 14.1 | 0.27  |      |      |      |      |     |      |       |      |       |      |     |     |     |       |      |     |       |      |     | 100  | 99    |              |
| S11    | 27   | 9        | Grt + Qz    | 57.18 |      | 10.6  | 19.9 |      | 11   | 1.2   |      | 0.18 |      |      |     |      |       |      |       |      |     |     |     |       |      |     |       |      |     | 100  | 98    |              |
| S11    | 27   | 10       | Qz          | 99.95 |      |       |      |      |      |       |      |      |      |      |     |      |       |      |       |      |     |     |     |       |      |     | 0.05  |      |     | 100  | 119   |              |
| S11    | 27   | 11       | Apy         | 0.49  |      |       | 27.1 |      |      |       |      |      |      | 31.1 |     |      |       |      |       | 0.73 |     |     | 41  |       |      |     |       |      |     | 100  | 175   |              |
| S11    | 27   | 12       | Kln + Chl + | 39.73 | 1.03 | 30    | 23.7 | 0.31 | 0.98 | 1.31  | 0.34 | 1.15 | 1.52 |      |     |      |       |      |       |      |     |     |     |       |      |     |       |      |     | 100  | 83    |              |
| S11    | 27   | 13       | Cal         | 0.51  |      |       |      |      |      | 55.49 |      |      |      |      |     |      |       |      |       |      |     |     |     |       |      |     |       |      |     | 56   | 51    |              |
| S11    | 27   | 14       | Qz          | 100   |      |       |      |      |      |       |      |      |      |      |     |      |       |      |       |      |     |     |     |       |      |     |       |      |     | 100  | 118   |              |
| S11    | 28   | 1        | Ap          |       |      |       |      |      |      | 48.45 |      |      | 44.1 |      | 5.9 |      |       |      |       |      |     |     |     |       |      |     |       |      | 2   |      | 100   | 126          |
| S11    | 28   | 2        | Cal +       | 6.96  |      |       |      |      |      | 93.04 |      |      |      |      |     |      |       |      |       |      |     |     |     |       |      |     |       |      |     |      | 100   | 58           |
| S11    | 28   | 3        | Qz          | 100   |      |       |      |      |      |       |      |      |      |      |     |      |       |      |       |      |     |     |     |       |      |     |       |      |     |      | 100   | 121          |
| S11    | 28   | 4        | Kln + Chl + | 49.4  | 0.67 | 31.3  | 13.9 |      | 1.41 | 1.17  |      | 1.53 | 0.67 |      |     |      |       |      |       |      |     |     |     |       |      |     |       |      |     |      | 100   | 85           |
| S11    | 28   | 5        | Kfs         | 66.09 |      | 17.8  |      |      |      |       | 0.42 | 15.7 |      |      |     |      |       |      |       |      |     |     |     |       |      |     |       |      |     |      | 100   | 116          |
| S11    | 28   | 6        | Cal         |       |      |       | 0.52 | 1.71 | 0.77 | 53.01 |      |      |      |      |     |      |       |      |       |      |     |     |     |       |      |     |       |      |     |      | 56    | 55           |
| S11    | 28   | 7        | Chl + Ms    | 49.77 |      | 20    | 12.1 |      | 14.4 | 0.7   | 0.43 | 2.56 |      |      |     |      |       |      |       |      |     |     |     |       |      |     |       |      |     |      | 100   | 101          |
| S11    | 28   | 8        | Ms +        | 43.48 | 9.28 | 25.7  | 5.51 |      | 3.18 |       | 0.3  | 7.53 |      |      |     |      |       |      |       |      |     |     |     |       |      |     |       |      |     | 95   | 109   |              |
| S11    | 28   | 9        | Qz          | 100   |      |       |      |      |      |       |      |      |      |      |     |      |       |      |       |      |     |     |     |       |      |     |       |      |     |      | 100   | 119          |
| S11    | 28   | 10       | Kfs         | 65.36 |      | 17.9  |      |      |      |       | 0.6  | 15.3 |      |      |     |      |       |      |       |      |     |     |     |       |      | 0.8 |       |      |     |      | 100   | 117          |
| S11    | 28   | 11       | Cal         |       |      |       |      |      |      | 56    |      |      |      |      |     |      |       |      |       |      |     |     |     |       |      |     |       |      |     |      | 56    | 57           |
| S11    | 28   | 12       | Cal +       | 4.81  |      | 1.64  |      |      |      | 91.67 | 1.06 |      |      | 0.81 |     |      |       |      |       |      |     |     |     |       |      |     |       |      |     |      | 100   | 56           |
| S11    | 28   | 13       | Mix         | 3.36  |      | 1.23  | 43.7 | 1.64 |      | 2.74  |      |      | 46.3 |      |     | 0.99 |       |      |       |      |     |     |     |       |      |     |       |      |     |      | 100   | 29           |
| S11    | 28   | 14       | Cal         |       |      |       |      |      |      | 56    |      |      |      |      |     |      |       |      |       |      |     |     |     |       |      |     |       |      |     |      | 56    | 55           |
| S11    | 28   | 15       | Cal         |       |      |       |      |      |      | 55.47 |      |      |      | 0.53 |     |      |       |      |       |      |     |     |     |       |      |     |       |      |     |      | 56    | 55           |
| S11    | 28   | 16       | Qz          | 100   |      |       |      |      |      |       |      |      |      |      |     |      |       |      |       |      |     |     |     |       |      |     |       |      |     |      | 100   | 120          |
| S11    | 28   | 17       | Qz          | 100   |      |       |      |      |      |       |      |      |      |      |     |      |       |      |       |      |     |     |     |       |      |     |       |      |     |      | 100   | 124          |
| S11    | 29   | 1        | Py          | 0.59  |      |       | 33.5 |      |      | 0.46  |      |      |      | 65.5 |     |      |       |      |       |      |     |     |     |       |      |     |       |      |     |      | 100   | 188          |
| S11    | 29   | 2        | Ilm         |       | 53.3 |       | 44.5 | 1.95 |      | 0.32  |      |      |      |      |     |      |       |      |       |      |     |     |     |       |      |     |       |      |     |      | 100   | 105          |
| S11    | 29   | 3        | Grt (Alm) + | 32.8  | 0.61 | 24.5  | 36.4 |      | 1    | 1.68  |      | 1.07 | 1.91 |      |     |      |       |      |       |      |     |     |     |       |      |     |       |      |     |      | 100   | 90           |
| S11    | 29   | 4        | Ep          | 41.37 |      | 23.5  | 8.24 |      | 2.16 | 20.93 |      |      | 0.84 |      |     |      |       |      |       |      |     |     |     |       |      |     |       |      |     |      | 97    | 106          |
| S11    | 29   | 5        | Qz          | 100   |      |       |      |      |      |       |      |      |      |      |     |      |       |      |       |      |     |     |     |       |      |     |       |      |     |      | 100   | 116          |
| S11    | 29   | 6        | Mix         | 48.04 | 0.78 | 24.6  | 20.9 |      | 1.16 | 1.12  |      | 1.14 | 2.02 |      |     | 0.22 |       |      |       |      |     |     |     |       |      |     |       |      |     |      | 100   | 77           |
| S11    | 29   | 7        | Qz          | 100   |      |       |      |      |      |       |      |      |      |      |     |      |       |      |       |      |     |     |     |       |      |     |       |      |     |      | 100   | 117          |
| S11    | 29   | 8        | TiO2        |       | 99.7 |       | 0.3  |      |      |       |      |      |      |      |     |      |       |      |       |      |     |     |     |       |      |     |       |      |     |      | 100   | 106          |
| S11    | 29   | 9        | Qz          | 100   |      |       |      |      |      |       |      |      |      |      |     |      |       |      |       |      |     |     |     |       |      |     |       |      |     |      | 100   | 121          |
| S11    | 29   | 10       | Qz +        | 86.8  |      | 7.36  | 3.08 |      | 0.89 | 0.44  |      | 1.44 |      |      |     |      |       |      |       |      |     |     |     |       |      |     |       |      |     |      | 100   | 111          |
| S11    | 29   | 11       | Cal         | 0.913 |      | 0.45  | 0.33 | 0.43 |      | 53.88 |      |      |      |      |     |      |       |      |       |      |     |     |     |       |      |     |       |      |     |      | 56    | 59           |
| S11    | 29   | 12       | Cal + Ap    | 1.09  |      |       | 1.35 | 2.26 | 0.81 | 88.07 |      |      | 6.43 |      |     |      |       |      |       |      |     |     |     |       |      |     |       |      |     |      | 100   | 57           |
| S11    | 29   | 13       | Mix         | 20    |      | 9.95  | 62.9 |      | 1.19 | 4.63  |      | 1.32 |      |      |     |      |       |      |       |      |     |     |     |       |      |     |       |      |     |      | 100   | 71           |
| S11    | 29   | 14       | Mix         | 35.98 | 2.93 | 15.2  | 27.8 | 6.33 | 2.18 | 6.08  |      | 1.29 | 2.23 |      |     |      |       |      |       |      |     |     |     |       |      |     |       |      |     |      | 100   | 88           |
| S11    | 29   | 15       | Grt +       | 44.51 | 1.12 | 21.4  | 13.9 | 9.92 | 2.98 | 2.67  | 0.41 | 2.53 | 0.58 |      |     |      |       |      |       |      |     |     |     |       |      |     |       |      |     |      | 100   | 87           |
| S11    | 29   | 16       | Qz          | 100   |      |       |      |      |      |       |      |      |      |      |     |      |       |      |       |      |     |     |     |       |      |     |       |      |     |      | 100   | 117          |
| S11    | 29   | 17       | Grt (Alm)   | 32.41 |      | 22    | 33.9 | 0.8  | 9.41 | 0.69  |      | 0.8  |      |      |     |      |       |      |       |      |     |     |     |       |      |     |       |      |     |      | 100   | 96           |
| S11    | 29   | 18       | Cal         |       |      |       |      |      |      | 55.31 |      |      |      | 0.69 |     |      |       |      |       |      |     |     |     |       |      |     |       |      |     |      | 56    | 57           |

Table A3.1: EDS analyses of sample S11.

| Sample | Site | Position | Mineral     | SiO2  | TiO2 | Al2O3 | FeO  | MnO  | MgO  | CaO   | Na2O | K2O  | P2O5 | SO3  | F | Cl   | Sc2O3 | V2O5 | Cr2O3 | CoO | NiO | CuO | ZnO | As2O3 | ZrO2 | BaO | Yb2O3 | HfO2 | WO3 | PtO2 | Total | Actual Total |
|--------|------|----------|-------------|-------|------|-------|------|------|------|-------|------|------|------|------|---|------|-------|------|-------|-----|-----|-----|-----|-------|------|-----|-------|------|-----|------|-------|--------------|
| S11    | 30   | 1        | Mix         | 31.17 |      | 9.03  | 3.77 |      | 0.94 | 27.8  |      | 1.61 | 23.9 |      |   | 1.83 |       |      |       |     |     |     |     |       |      |     |       |      |     |      | 100   | 18           |
| S11    | 30   | 2        | Qz          | 100   |      |       |      |      |      |       |      |      |      |      |   |      |       |      |       |     |     |     |     |       |      |     |       |      |     |      | 100   | 116          |
| S11    | 30   | 3        | Zrn         | 31.05 |      | 0.46  |      |      |      |       |      |      |      |      |   |      |       |      |       |     |     |     |     | 66.9  |      |     | 2     |      |     |      | 100   | 116          |
| S11    | 30   | 4        | Grt (Alm)   | 37.3  |      | 21.1  | 28.7 | 0.43 | 10.1 | 0.99  | 0.87 | 0.57 |      |      |   |      |       |      |       |     |     |     |     |       |      |     |       |      |     |      | 100   | 93           |
| S11    | 30   | 5        | Qz          | 100   |      |       |      |      |      |       |      |      |      |      |   |      |       |      |       |     |     |     |     |       |      |     |       |      |     |      | 100   | 114          |
| S11    | 30   | 6        | Py          | 0.79  |      |       | 32.5 |      |      | 0.78  |      |      |      | 65.9 |   |      |       |      |       |     |     |     |     |       |      |     |       |      |     |      | 100   | 189          |
| S11    | 30   | 7        | Qz          | 100   |      |       |      |      |      |       |      |      |      |      |   |      |       |      |       |     |     |     |     |       |      |     |       |      |     |      | 100   | 119          |
| S11    | 30   | 8        | Grt (Alm)   | 35.28 |      | 22    | 32.7 | 0.45 | 8.77 | 0.54  |      | 0.25 |      |      |   |      |       |      |       |     |     |     |     |       |      |     |       |      |     |      | 100   | 96           |
| S11    | 30   | 9        | Cal         |       |      |       |      |      | 0.55 | 55.45 |      |      |      |      |   |      |       |      |       |     |     |     |     |       |      |     |       |      |     |      | 56    | 56           |
| S11    | 30   | 10       | Cal +       | 7.41  |      | 2.42  | 0.76 |      | 1.23 | 87.48 |      | 0.71 |      |      |   |      |       |      |       |     |     |     |     |       |      |     |       |      |     |      | 100   | 61           |
| S11    | 30   | 11       | Zrn         | 31.12 |      |       |      |      |      |       |      |      |      |      |   |      |       |      |       |     |     |     |     |       | 67.5 |     |       | 1    |     |      | 100   | 123          |
| S11    | 30   | 12       | Py          | 0.48  |      |       | 32.1 |      |      | 0.35  |      |      |      | 67.1 |   |      |       |      |       |     |     |     |     |       |      |     |       |      |     |      | 100   | 198          |
| S11    | 30   | 13       | Ti - Mag +  | 1.17  | 19.6 |       | 77.9 | 1.39 |      |       |      |      |      |      |   |      |       |      |       |     |     |     |     |       |      |     |       |      |     |      | 100   | 90           |
| S11    | 30   | 14       | Qz          | 100   |      |       |      |      |      |       |      |      |      |      |   |      |       |      |       |     |     |     |     |       |      |     |       |      |     |      | 100   | 102          |
| S11    | 30   | 15       | Qz          | 96.96 |      | 2.4   | 0.33 |      |      |       |      | 0.31 |      |      |   |      |       |      |       |     |     |     |     |       |      |     |       |      |     |      | 100   | 110          |
| S11    | 30   | 16       | Spl         |       |      | 34.1  | 20   |      | 13.1 |       |      |      |      |      |   |      |       |      | 32.8  |     |     |     |     |       |      |     |       |      |     |      | 100   | 108          |
| S11    | 30   | 17       | Qz          | 100   |      |       |      |      |      |       |      |      |      |      |   |      |       |      |       |     |     |     |     |       |      |     |       |      |     |      | 100   | 121          |
| S11    | 30   | 18       | Cal         | 0.504 |      |       |      |      |      | 55.5  |      |      |      |      |   |      |       |      |       |     |     |     |     |       |      |     |       |      |     |      | 56    | 54           |
| S11    | 30   | 19       | Kfs         | 65.76 |      | 17.7  |      |      |      |       |      | 15.9 |      |      |   |      |       |      |       |     |     |     |     |       | 0.61 |     |       |      |     |      | 100   | 112          |
| S11    | 30   | 20       | Chl + Kfs + | 61.92 | 0.47 | 18.9  | 9    |      | 1.77 | 3.51  |      | 3.83 | 0.59 |      |   |      |       |      |       |     |     |     |     |       |      |     |       |      |     |      | 100   | 81           |
| S11    | 30   | 21       | Cal         |       |      |       |      |      | 0.4  | 55.47 |      | 0.13 |      |      |   |      |       |      |       |     |     |     |     |       |      |     |       |      |     |      | 56    | 55           |
| S11    | 31   | 1        | Feho +      | 3.62  |      | 1.78  | 89.6 | 0.75 | 0.64 | 1.01  |      |      | 1.82 | 0.8  |   |      |       |      |       |     |     |     |     |       |      |     |       |      |     |      | 100   | 75           |
| S11    | 31   | 2        | Ttn         | 31.55 | 37.6 | 2.35  | 1.97 |      | 0.6  | 25    |      |      |      |      |   |      |       | 0.9  |       |     |     |     |     |       |      |     |       |      |     |      | 100   | 108          |
| S11    | 31   | 3        | Grt         | 43.05 | 0.49 | 19.2  | 20.8 |      | 13.3 | 2.35  |      | 0.72 |      |      |   |      |       |      |       |     |     |     |     |       |      |     |       |      |     |      | 100   | 82           |
| S11    | 31   | 4        | Qz          | 100   |      |       |      |      |      |       |      |      |      |      |   |      |       |      |       |     |     |     |     |       |      |     |       |      |     |      | 100   | 120          |
| S11    | 31   | 5        | Cal         |       |      |       |      |      |      | 56    |      |      |      |      |   |      |       |      |       |     |     |     |     |       |      |     |       |      |     |      | 56    | 58           |
| S11    | 31   | 6        | Cal         |       |      |       |      |      | 0.37 | 55.63 |      |      |      |      |   |      |       |      |       |     |     |     |     |       |      |     |       |      |     |      | 56    | 58           |
| S11    | 31   | 7        | Mix?        | 53.57 | 46.2 |       | 0.24 |      |      |       |      |      |      |      |   |      |       |      |       |     |     |     |     |       |      |     |       |      |     |      | 100   | 115          |
| S11    | 31   | 8        | Mix         | 6.07  |      | 1.95  | 80.2 |      |      | 4.22  |      |      | 6.42 | 1.19 |   |      |       |      |       |     |     |     |     |       |      |     |       |      |     |      | 100   | 56           |
| S11    | 31   | 9        | Cal         |       |      |       |      | 1.24 | 0.63 | 54.13 |      |      |      |      |   |      |       |      |       |     |     |     |     |       |      |     |       |      |     |      | 56    | 53           |
| S11    | 31   | 10       | Mix         | 15.98 |      | 7.08  | 21.8 |      | 0.8  | 5.31  |      | 0.82 |      | 48.2 |   |      |       |      |       |     |     |     |     |       |      |     |       |      |     |      | 100   | 102          |
| S11    | 31   | 11       | Cal +       | 1.596 |      | 0.63  | 0.27 |      |      | 53.39 |      | 0.11 |      |      |   |      |       |      |       |     |     |     |     |       |      |     |       |      |     |      | 56    | 53           |
| S11    | 31   | 12       | Pl (Ads)    | 58.59 |      | 26.3  |      |      |      | 8.38  | 6.71 |      |      |      |   |      |       |      |       |     |     |     |     |       |      |     |       |      |     |      | 100   | 112          |
| S11    | 31   | 13       | Qz          | 100   |      |       |      |      |      |       |      |      |      |      |   |      |       |      |       |     |     |     |     |       |      |     |       |      |     |      | 100   | 115          |
| S11    | 31   | 14       | Cal +       | 29.89 | 1    | 11.8  | 3    |      | 1.27 | 51.92 |      | 1.14 |      |      |   |      |       |      |       |     |     |     |     |       |      |     |       |      |     |      | 100   | 63           |
| S11    | 32   | 1        | Ttn         | 35.29 | 29.9 | 5.57  | 2.02 |      |      | 27    |      |      |      |      |   |      |       |      |       |     |     |     | 0.3 |       |      |     |       |      |     |      | 100   | 102          |
| S11    | 32   | 2        | TiO2        |       | 98.5 | 0.59  | 0.64 |      |      | 0.25  |      |      |      |      |   |      |       |      |       |     |     |     |     |       |      |     |       |      |     |      | 100   | 100          |
| S11    | 32   | 3        | Cal +       | 3.95  |      |       | 1.23 | 1.05 | 1.54 | 92    |      | 0.22 |      |      |   |      |       |      |       |     |     |     |     |       |      |     |       |      |     |      | 100   | 56           |
| S11    | 32   | 4        | Qz          | 100   |      |       |      |      |      |       |      |      |      |      |   |      |       |      |       |     |     |     |     |       |      |     |       |      |     |      | 100   | 117          |
| S11    | 32   | 5        | Kfs         | 63.78 |      | 17.5  | 2.85 |      | 1.97 |       | 0.47 | 13.5 |      |      |   |      |       |      |       |     |     |     |     |       |      |     |       |      |     |      | 100   | 105          |
| S11    | 32   | 6        | Cal         | 0.403 |      |       |      |      |      | 55.6  |      |      |      |      |   |      |       |      |       |     |     |     |     |       |      |     |       |      |     |      | 56    | 54           |
| S11    | 32   | 7        | Cal         |       |      |       |      |      |      | 56    |      |      |      |      |   |      |       |      |       |     |     |     |     |       |      |     |       |      |     |      | 56    | 53           |
| S11    | 32   | 8        | Cal         |       |      |       |      |      |      | 56    |      |      |      |      |   |      |       |      |       |     |     |     |     |       |      |     |       |      |     |      | 56    | 54           |
| S11    | 32   | 9        | Cal         | 0.588 |      |       |      |      | 0.32 | 54.48 |      |      |      | 0.61 |   |      |       |      |       |     |     |     |     |       |      |     |       |      |     |      | 56    | 55           |
| S11    | 32   | 10       | Cal         |       |      |       |      |      | 0.42 | 55.58 |      |      |      |      |   |      |       |      |       |     |     |     |     |       |      |     |       |      |     |      | 56    | 54           |
| S11    | 32   | 11       | Kfs         | 66.02 |      | 17.8  |      |      |      |       | 0.83 | 15.4 |      |      |   |      |       |      |       |     |     |     |     |       |      |     |       |      |     |      | 100   | 116          |

Table A3.1: EDS analyses of sample S11.

| Sample | Site | Position | Mineral                                  | SiO2  | TiO2 | Al2O3 | FeO  | MnO  | MgO  | CaO   | Na2O | K2O  | P2O5 | SO3  | F   | Cl   | Sc2O3 | V2O5 | Cr2O3 | CoO | NiO | CuO | ZnO | As2O3 | ZrO2 | BaO | Yb2O3 | HfO2 | WO3 | PtO2 | Total | Actual Total |  |  |  |  |
|--------|------|----------|------------------------------------------|-------|------|-------|------|------|------|-------|------|------|------|------|-----|------|-------|------|-------|-----|-----|-----|-----|-------|------|-----|-------|------|-----|------|-------|--------------|--|--|--|--|
| S11    | 32   | 12       | Mix                                      | 10.55 | 0.68 | 9.3   | 71.8 | 1    | 1.04 | 1.79  |      | 0.3  | 3.15 |      |     |      |       |      | 0.36  |     |     |     |     |       |      |     |       |      |     |      | 100   | 63           |  |  |  |  |
| S11    | 32   | 13       | Grt (Alm)                                | 42.51 | 0.77 | 19.9  | 29   |      | 1.83 | 2.19  |      | 1.35 | 1.77 |      |     | 0.69 |       |      |       |     |     |     |     |       |      |     |       |      |     |      | 100   | 48           |  |  |  |  |
| S11    | 33   | 1        | Chl +                                    | 39.1  |      | 11.1  | 27   | 0.43 | 19.1 | 1.79  | 0.54 | 0.24 | 0.69 |      |     |      |       |      |       |     |     |     |     |       |      |     |       |      |     |      | 100   | 100          |  |  |  |  |
| S11    | 33   | 2        | Qz                                       | 100   |      |       |      |      |      |       |      |      |      |      |     |      |       |      |       |     |     |     |     |       |      |     |       |      |     |      | 100   | 124          |  |  |  |  |
| S11    | 33   | 3        | Cal                                      |       |      |       |      |      | 0.62 | 55.38 |      |      |      |      |     |      |       |      |       |     |     |     |     |       |      |     |       |      |     |      | 56    | 61           |  |  |  |  |
| S11    | 33   | 4        | Cal                                      |       |      |       |      |      |      | 56    |      |      |      |      |     |      |       |      |       |     |     |     |     |       |      |     |       |      |     |      | 56    | 60           |  |  |  |  |
| S11    | 33   | 5        | Cal                                      | 0.482 |      |       |      |      |      | 55.52 |      |      |      |      |     |      |       |      |       |     |     |     |     |       |      |     |       |      |     |      | 56    | 59           |  |  |  |  |
| S11    | 33   | 6        | Qz                                       | 100   |      |       |      |      |      |       |      |      |      |      |     |      |       |      |       |     |     |     |     |       |      |     |       |      |     |      | 100   | 125          |  |  |  |  |
| S11    | 33   | 7        | Grt +                                    | 38.89 | 0.32 | 28.5  | 26.9 |      | 1.36 | 1.11  | 0.42 | 0.93 | 1.61 |      |     |      |       |      |       |     |     |     |     |       |      |     |       |      |     |      | 100   | 104          |  |  |  |  |
| S11    | 33   | 8        | Qz                                       | 100   |      |       |      |      |      |       |      |      |      |      |     |      |       |      |       |     |     |     |     |       |      |     |       |      |     |      | 100   | 127          |  |  |  |  |
| S11    | 33   | 9        | Kfs                                      | 66.15 |      | 17.5  |      |      |      |       | 0.32 | 16   |      |      |     |      |       |      |       |     |     |     |     |       |      |     |       |      |     |      | 100   | 127          |  |  |  |  |
| S11    | 33   | 10       | Mix                                      | 14.41 | 36.6 | 5.84  | 39.4 | 1.03 | 1.01 | 0.85  |      | 0.23 | 0.56 |      |     |      |       |      |       |     |     | 0.1 |     |       |      |     |       |      |     |      | 100   | 98           |  |  |  |  |
| S11    | 33   | 11       | Qz                                       | 99.51 |      |       |      |      |      | 0.49  |      |      |      |      |     |      |       |      |       |     |     |     |     |       |      |     |       |      |     |      | 100   | 124          |  |  |  |  |
| S11    | 34   | 1        | Ap                                       |       |      |       | 0.4  |      |      | 49.22 | 0.55 |      | 41.1 | 0.75 | 6.6 |      |       |      |       |     |     |     |     |       |      |     |       | 1    |     |      | 100   | 113          |  |  |  |  |
| S11    | 34   | 2        | Kfs                                      | 66.26 |      | 18.3  |      |      |      |       | 1.53 | 14   |      |      |     |      |       |      |       |     |     |     |     |       |      |     |       |      |     |      | 100   | 120          |  |  |  |  |
| S11    | 34   | 3        | Qz                                       | 100   |      |       |      |      |      |       |      |      |      |      |     |      |       |      |       |     |     |     |     |       |      |     |       |      |     |      | 100   | 125          |  |  |  |  |
| S11    | 34   | 4        | Ab                                       | 69.76 |      | 18.5  |      |      |      |       | 11.7 |      |      |      |     |      |       |      |       |     |     |     |     |       |      |     |       |      |     |      | 100   | 124          |  |  |  |  |
| S11    | 34   | 5        | Mix                                      | 55.56 |      | 15.5  | 2    |      | 0.92 | 14.77 | 0.29 | 11   |      |      |     |      |       |      |       |     |     |     |     |       |      |     |       |      |     |      | 100   | 104          |  |  |  |  |
| S11    | 34   | 6        | Mix                                      | 68.76 |      | 2.56  | 2.07 | 0.4  | 1.05 | 24.49 | 0.67 |      |      |      |     |      |       |      |       |     |     |     |     |       |      |     |       |      |     |      | 100   | 91           |  |  |  |  |
| S11    | 34   | 7        | Kfs                                      | 65.94 |      | 17.9  |      |      |      |       | 0.43 | 15.7 |      |      |     |      |       |      |       |     |     |     |     |       |      |     |       |      |     |      | 100   | 128          |  |  |  |  |
| S11    | 34   | 8        | Qz                                       | 100   |      |       |      |      |      |       |      |      |      |      |     |      |       |      |       |     |     |     |     |       |      |     |       |      |     |      | 100   | 129          |  |  |  |  |
| S11    | 34   | 9        | Qz                                       | 100   |      |       |      |      |      |       |      |      |      |      |     |      |       |      |       |     |     |     |     |       |      |     |       |      |     |      | 100   | 125          |  |  |  |  |
| S11    | 34   | 10       | Cal                                      | 0.605 |      |       |      |      |      | 55.4  |      |      |      |      |     |      |       |      |       |     |     |     |     |       |      |     |       |      |     |      | 56    | 61           |  |  |  |  |
| S11    | 34   | 11       | Cal                                      |       |      |       |      |      |      | 56    |      |      |      |      |     |      |       |      |       |     |     |     |     |       |      |     |       |      |     |      | 56    | 60           |  |  |  |  |
| S11    | 34   | 12       | Qz                                       | 99.86 |      |       |      |      |      |       |      | 0.14 |      |      |     |      |       |      |       |     |     |     |     |       |      |     |       |      |     |      | 100   | 124          |  |  |  |  |
| S11    | 34   | 13       | Cal                                      |       |      |       |      |      |      | 56    |      |      |      |      |     |      |       |      |       |     |     |     |     |       |      |     |       |      |     |      | 56    | 63           |  |  |  |  |
| S11    | 34   | 14       | Qz+                                      | 77.58 |      | 8.92  | 8.75 |      | 0.43 | 0.74  | 0.3  | 2.73 | 0.56 |      |     |      |       |      |       |     |     |     |     |       |      |     |       |      |     |      | 100   | 118          |  |  |  |  |
| S11    | 35   | 1        | Qz                                       | 100   |      |       |      |      |      |       |      |      |      |      |     |      |       |      |       |     |     |     |     |       |      |     |       |      |     |      | 100   | 125          |  |  |  |  |
| S11    | 35   | 2        | Qz                                       | 99.81 |      |       |      |      |      |       |      |      |      |      |     | 0.19 |       |      |       |     |     |     |     |       |      |     |       |      |     |      | 100   | 86           |  |  |  |  |
| S11    | 35   | 3        | Qz                                       | 98.79 |      | 0.88  |      |      |      |       |      | 0.33 |      |      |     |      |       |      |       |     |     |     |     |       |      |     |       |      |     |      | 100   | 125          |  |  |  |  |
| S11    | 35   | 4        | Pl (Ads)                                 | 64.36 |      | 22.4  |      |      |      | 4.04  | 9.21 |      |      |      |     |      |       |      |       |     |     |     |     |       |      |     |       |      |     |      | 100   | 126          |  |  |  |  |
| S11    | 35   | 5        | Zrn                                      | 31.17 |      |       |      |      |      |       |      |      |      |      |     |      |       |      |       |     |     |     |     |       | 68.8 |     |       |      |     |      | 100   | 130          |  |  |  |  |
| S11    | 35   | 6        | Qz                                       | 100   |      |       |      |      |      |       |      |      |      |      |     |      |       |      |       |     |     |     |     |       |      |     |       |      |     |      | 100   | 129          |  |  |  |  |
| S11    | 35   | 7        | Cal                                      |       |      |       |      |      |      | 55.33 |      |      |      | 0.67 |     |      |       |      |       |     |     |     |     |       |      |     |       |      |     |      | 56    | 60           |  |  |  |  |
| S11    | 35   | 8        | Mix                                      | 28.4  | 1.09 | 18.4  | 45.2 | 0.84 | 1.16 | 0.69  |      | 3.14 | 1.08 |      |     |      |       |      |       |     |     |     |     |       |      |     |       |      |     |      | 100   | 91           |  |  |  |  |
| S11    | 35   | 9        | Kln +                                    | 55.8  | 0.47 | 35.9  | 3.78 |      | 1.12 | 1.05  |      | 1.7  |      |      |     | 0.22 |       |      |       |     |     |     |     |       |      |     |       |      |     |      | 100   | 86           |  |  |  |  |
| S11    | 35   | 10       | Qz                                       | 100   |      |       |      |      |      |       |      |      |      |      |     |      |       |      |       |     |     |     |     |       |      |     |       |      |     |      | 100   | 127          |  |  |  |  |
| S11    | 35   | 11       | Cal                                      |       |      |       |      | 0.67 |      | 55.33 |      |      |      |      |     |      |       |      |       |     |     |     |     |       |      |     |       |      |     |      | 56    | 58           |  |  |  |  |
| S11    | 35   | 12       | Cal                                      |       |      |       |      |      | 0.52 | 55.48 |      |      |      |      |     |      |       |      |       |     |     |     |     |       |      |     |       |      |     |      | 56    | 59           |  |  |  |  |
|        |      |          |                                          |       |      |       |      |      |      |       |      |      |      |      |     |      |       |      |       |     |     |     |     |       |      |     |       |      |     |      |       |              |  |  |  |  |
|        |      |          | Notes                                    |       |      |       |      |      |      |       |      |      |      |      |     |      |       |      |       |     |     |     |     |       |      |     |       |      |     |      |       |              |  |  |  |  |
|        |      |          | + = indicates other minerals are present |       |      |       |      |      |      |       |      |      |      |      |     |      |       |      |       |     |     |     |     |       |      |     |       |      |     |      |       |              |  |  |  |  |
|        |      |          | " " = indicates that mineral is altered  |       |      |       |      |      |      |       |      |      |      |      |     |      |       |      |       |     |     |     |     |       |      |     |       |      |     |      |       |              |  |  |  |  |
|        |      |          | Feho = Fe-oxide/hydroxide                |       |      |       |      |      |      |       |      |      |      |      |     |      |       |      |       |     |     |     |     |       |      |     |       |      |     |      |       |              |  |  |  |  |
|        |      |          | Pl (Ads) = Plagioclase (Andesine)        |       |      |       |      |      |      |       |      |      |      |      |     |      |       |      |       |     |     |     |     |       |      |     |       |      |     |      |       |              |  |  |  |  |

A4: SEM-BSE images and EDS  
mineral analyses for sample S12



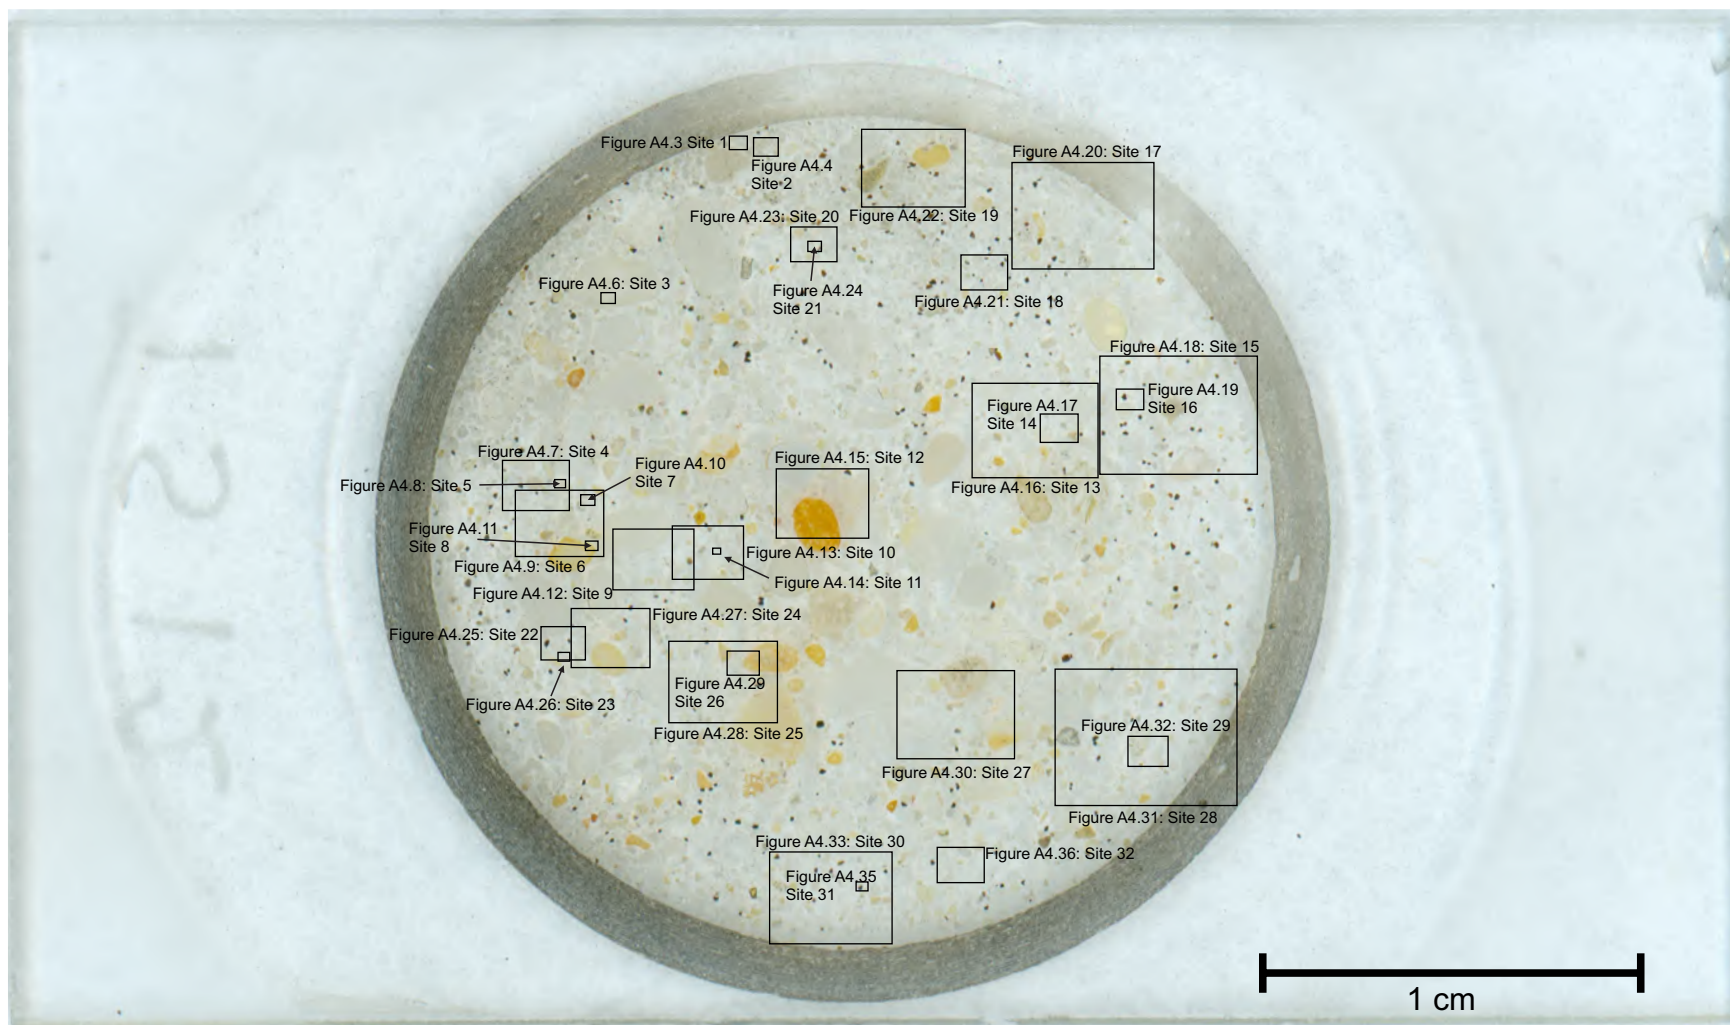

Figure A4:1: Slide S12, Fine sand with heavy minerals taken from Monolithos beach.

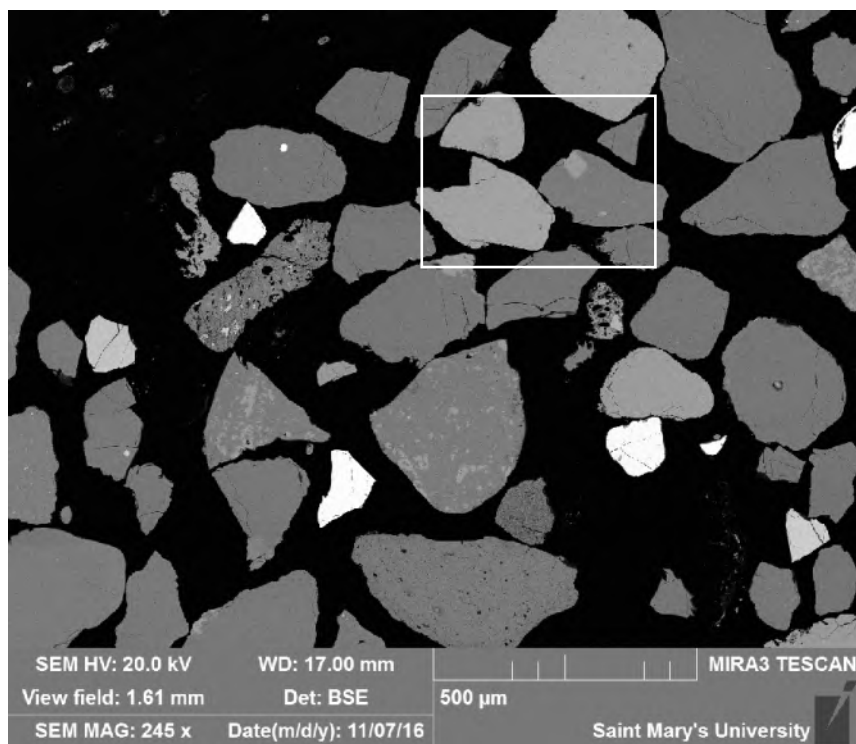

Figure A4.2: Sample S12 (SEM).

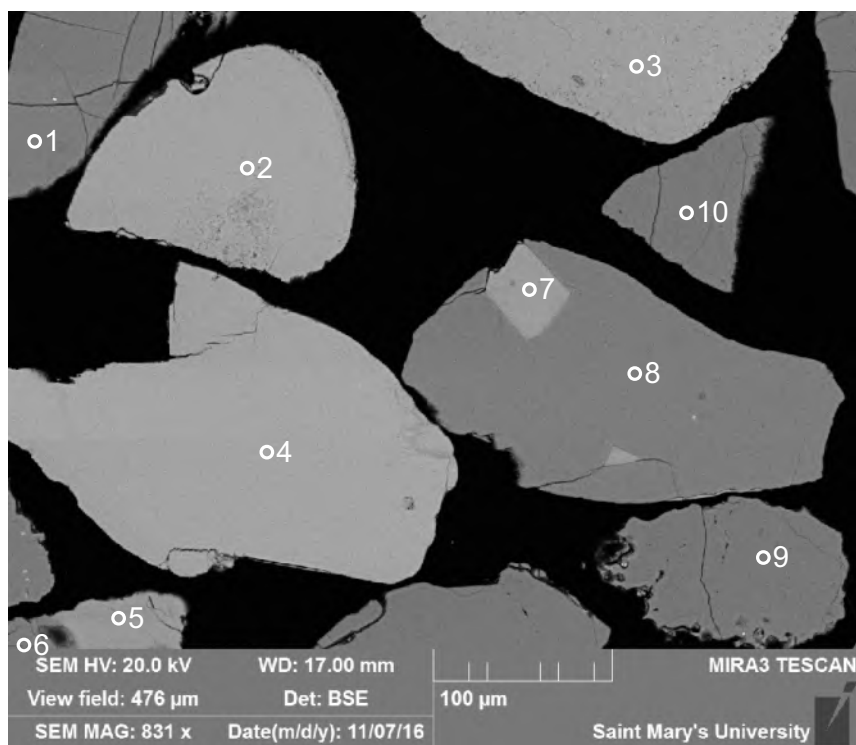

- 1: Quartz
- 2: Calcite
- 3: Calcite
- 4: Calcite
- 5: K-Feldspar
- 6: Quartz
- 7: Calcite
- 8: Quartz
- 9: Quartz
- 10: Quartz

Figure A4.3: Sample S12 Site 1 (SEM). This site contains: detrital quartz (1, 6, 8, 9, 10), calcite (2, 3, 4, 7) and K-Feldspar (5). Lithic clast: Quartz + Calcite (7-8, chert in sparry limestone).

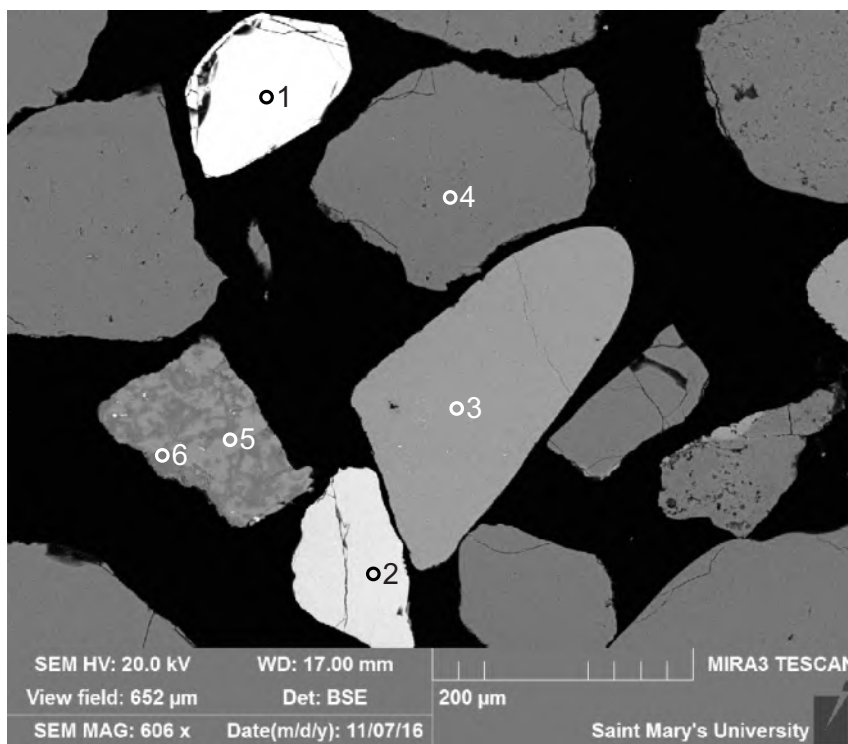

- 1: Chromite
- 2:  $\text{TiO}_2$
- 3: Calcite
- 4: Quartz
- 5: K-Feldspar
- 6: Quartz

Figure A4.4: Sample S12 Site 2 (SEM). This site contains: detrital chromite (1),  $\text{TiO}_2$  (2), quartz (4,6), K-Feldspar (5), and calcite (3). Lithic clast: Quartz + K-feldspar (5-6, igneous).

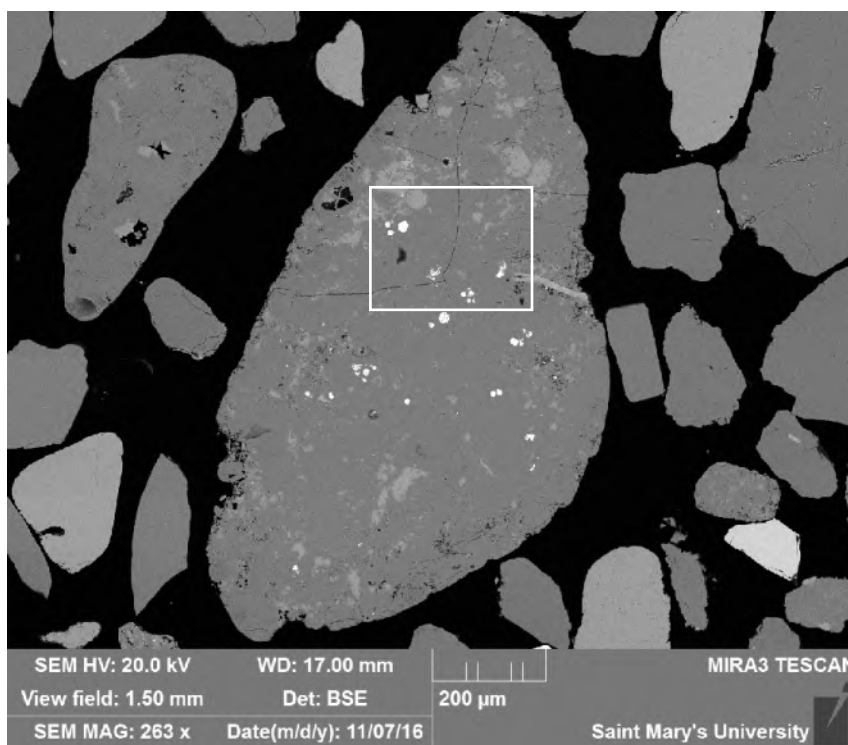

Figure A4.5: Sample S12 (SEM).



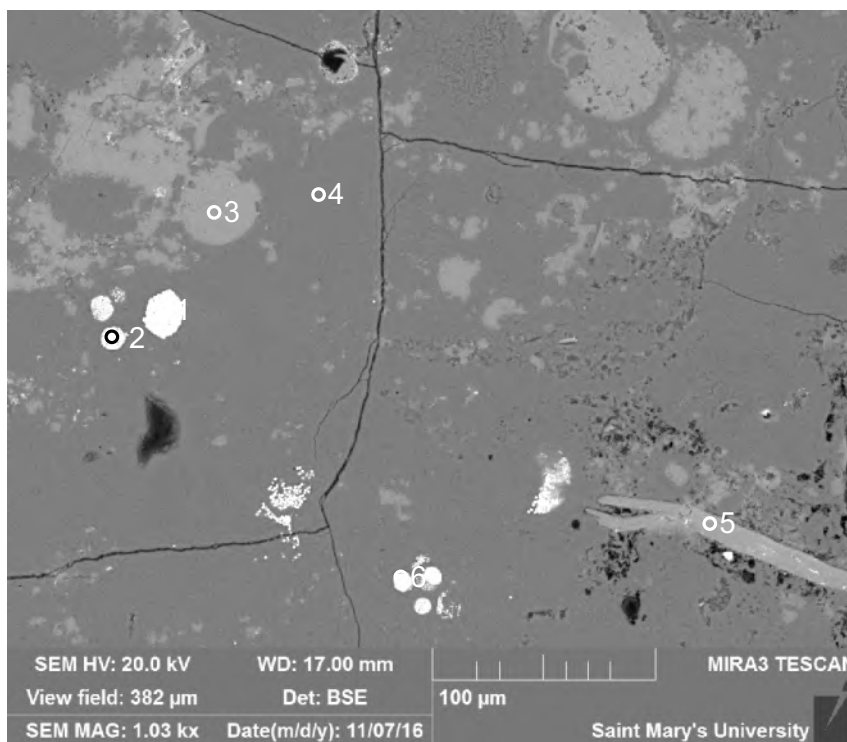

- 1: Pyrite
- 2: Pyrite
- 3: Calcite+
- 4: Quartz
- 5: Muscovite + Chlorite +
- 6: Pyrite

Figure A4.6: Sample S12 Site 3 (SEM). This site contains: Detrital quartz (4), pyrite (1, 2, 6), and calcite (3). Lithic clast: Quartz + Calcite + Pyrite + Muscovite (1-6, chert in a sandy limestone).

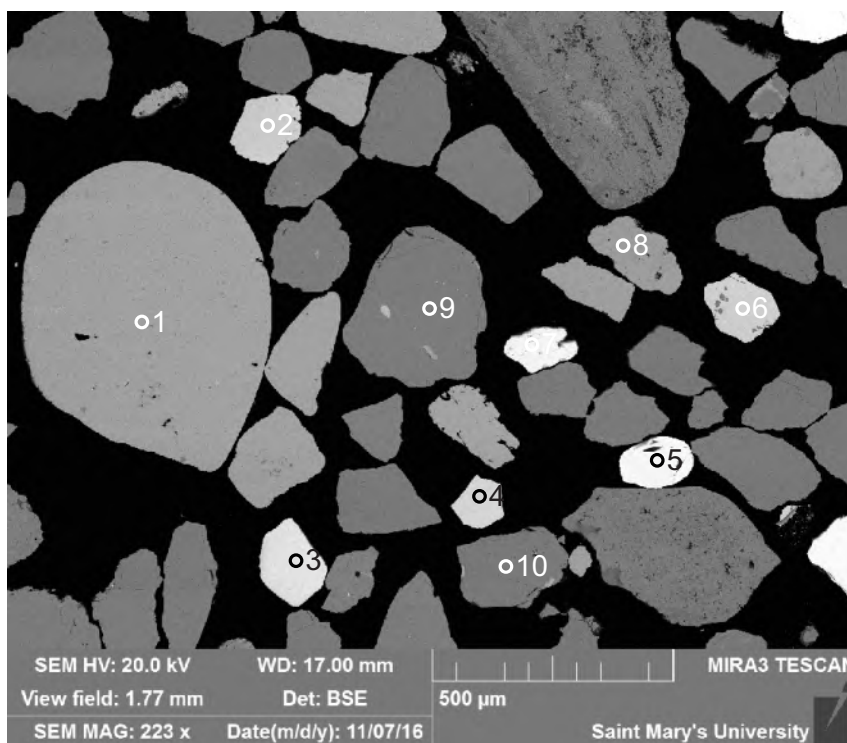

- 1: Calcite+
- 2: Garnet (Almandine)
- 3: Spinel
- 4: Garnet (Almandine)
- 5: Spinel
- 6: Garnet (Almandine)
- 7:  $\text{TiO}_2$
- 8: Calcite
- 9: Quartz
- 10: Quartz

Figure A4.7: Sample S12 Site 4 (SEM). This site contains: Detrital calcite (1-2), quartz (9-10), garnet (3-4,6), spinel (3,5), and titania (7).



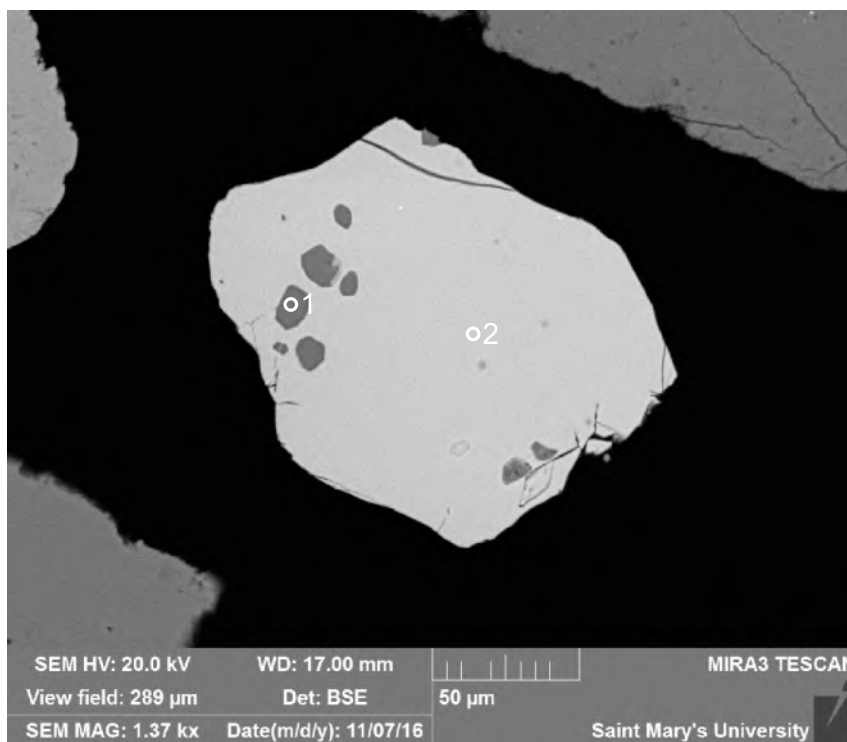

- 1: Quartz
- 2: Garnet (Almandine)

Figure A4.8: Sample S12 Site 5 (SEM). This site contains: Detrital garnet (2), and quartz (1). Lithic clast: Garnet + Quartz (1-2, garnet with quartz inclusions, metamorphic).

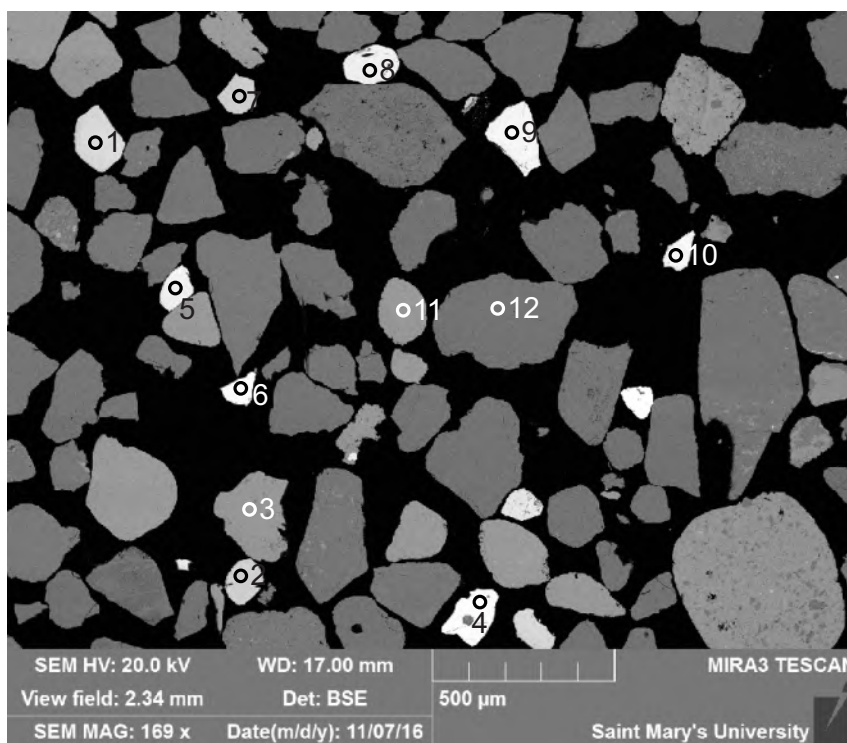

- 1: Spinel
- 2: Garnet (Almandine)
- 3: K-Feldspar
- 4: Chromite
- 5: Chromite
- 6: Chromite
- 7: Garnet (Almandine)
- 8: Spinel
- 9: Chromite
- 10: Chromite
- 11: Calcite
- 12: Quartz

Figure A4.9: Sample S12 Site 6 (SEM). This site contains: Detrital spinel (1,8), chromite (4-6,9-10), quartz (12), calcite (11), garnet (2,7), and K-feldspar (3).

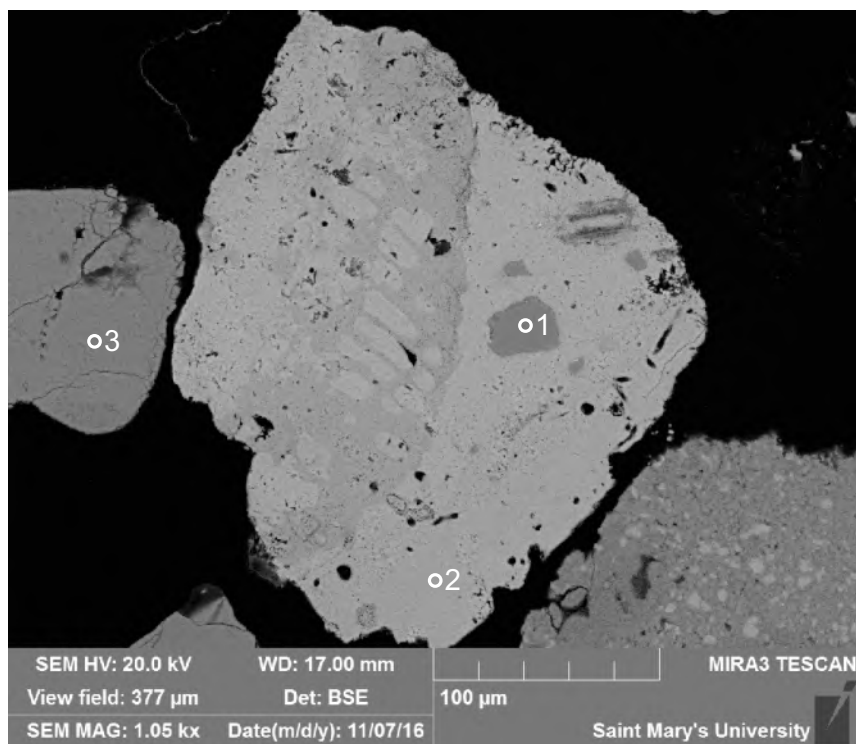

- 1: Quartz
- 2: Calcite
- 3: Quartz

Figure A4.10: Sample S12 Site 7 (SEM). This site contains: Detrital quartz (1,3), and calcite (2). Lithic clast: Quartz + Calcite (1-2, detrital subhedral quartz in sandy limestone).

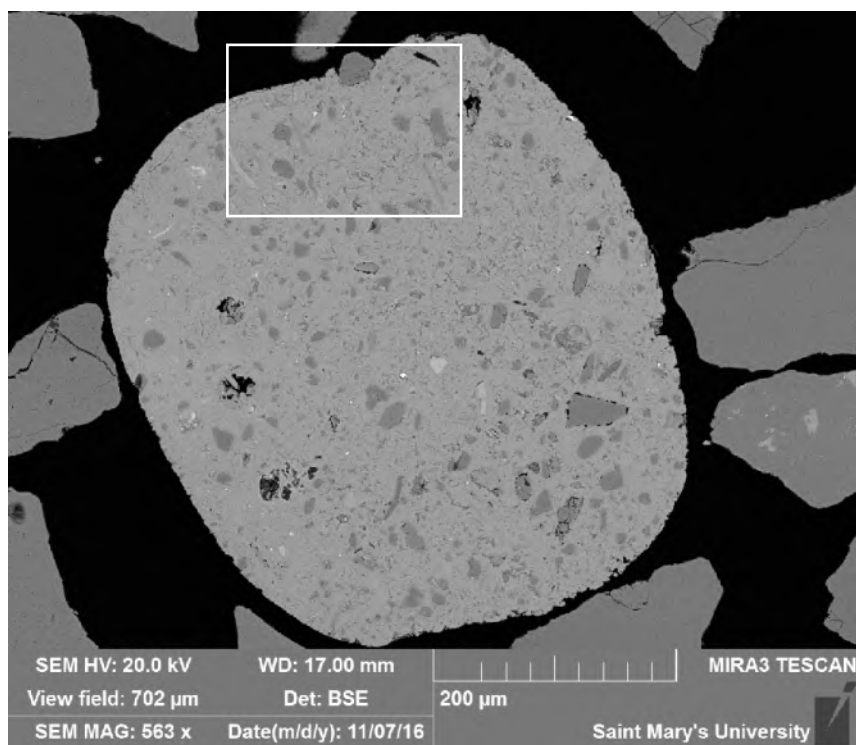

Figure A4.11: Sample S12 (SEM).

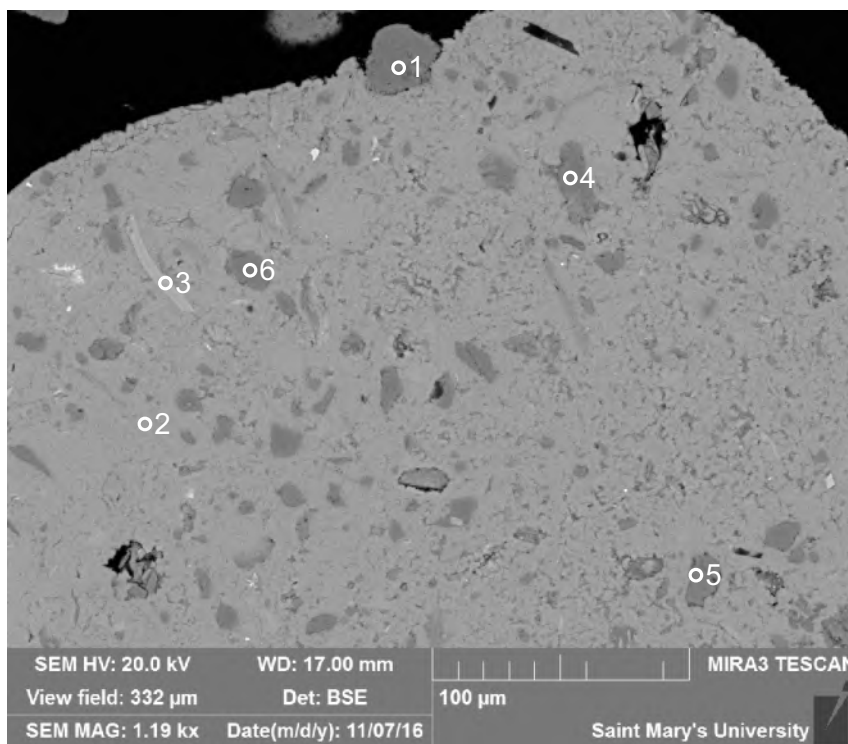

- 1: Albite
- 2: Calcite+
- 3: Chlorite
- 4: Quartz
- 5: Quartz
- 6: Quartz

Figure A4.12: Sample S12 Site 8 (SEM). This site contains: Detrital calcite (2), albite (1), quartz (4, 5, 6), and chlorite (3). Lithic clast: Calcite + Quartz + Albite + Chlorite (1-6, sandy limestone).

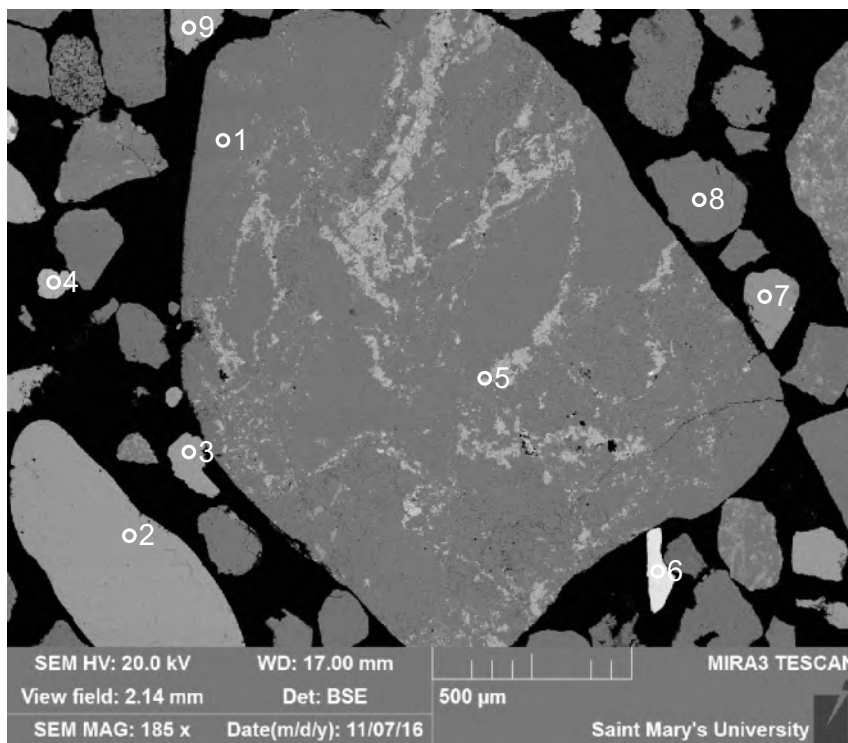

- 1: Quartz
- 2: Calcite
- 3: Calcite
- 4: Spinel
- 5: Epidote
- 6: Chromite
- 7: K-Feldspar
- 8: Quartz
- 9: Calcite

Figure A4.13: Sample S12 Site 9 (SEM). This site contains: Detrital quartz (1,8), calcite (2,3,9), spinel (4), chromite (6), epidote (5), and K-feldspar (7). Lithic clast: Quartz + Epidote (1,5, quartz vein, hydrothermal).

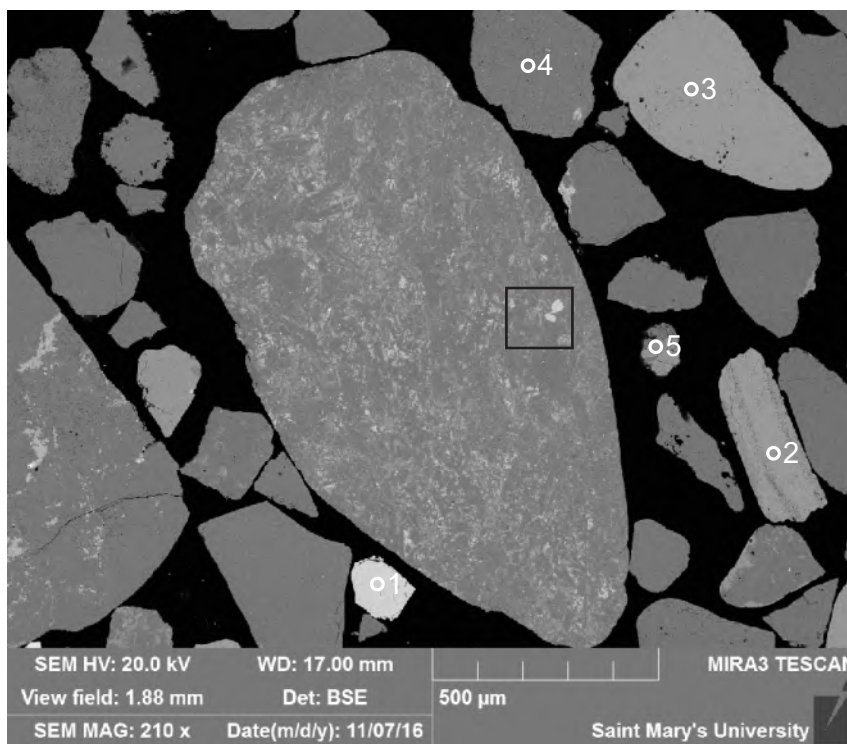

- 1: Garnet (Almandine)
- 2: Calcite
- 3: Calcite
- 4: Quartz
- 5: K-Feldspar

Figure A4.14: Sample S12 Site 10 (SEM). This site contains: Detrital quartz (4), calcite (2-3), garnet (1), and K-feldspar (5).

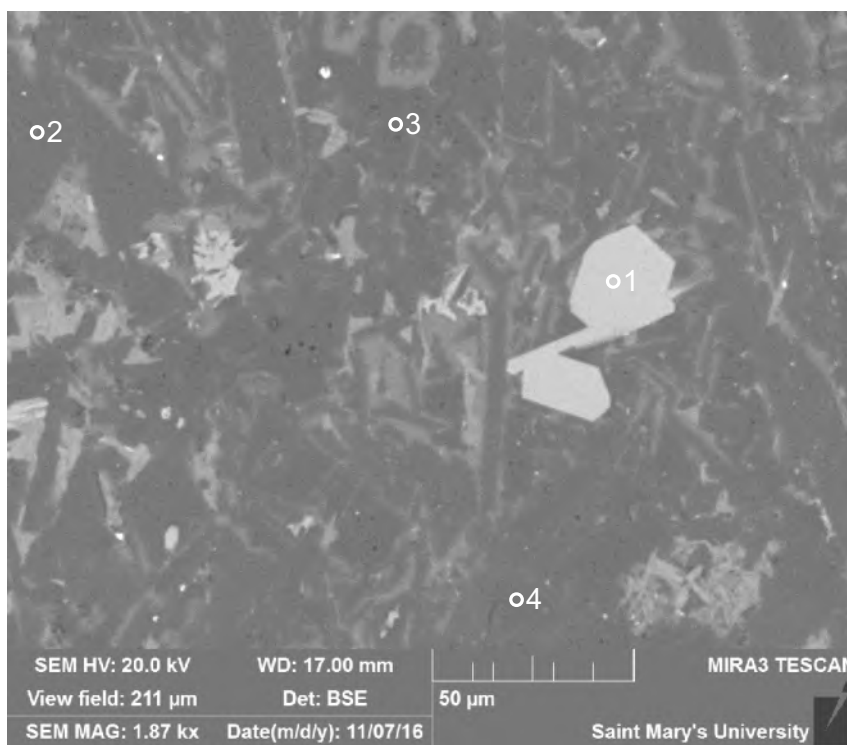

- 1: Apatite
- 2: Albite
- 3: Quartz
- 4: Quartz

Figure A4.15: Sample S12 Site 11 (SEM). This site contains: detrital quartz (3, 4), albite (2), and apatite (1). Lithic clast: Quartz + Albite + Apatite (1-4, igneous).



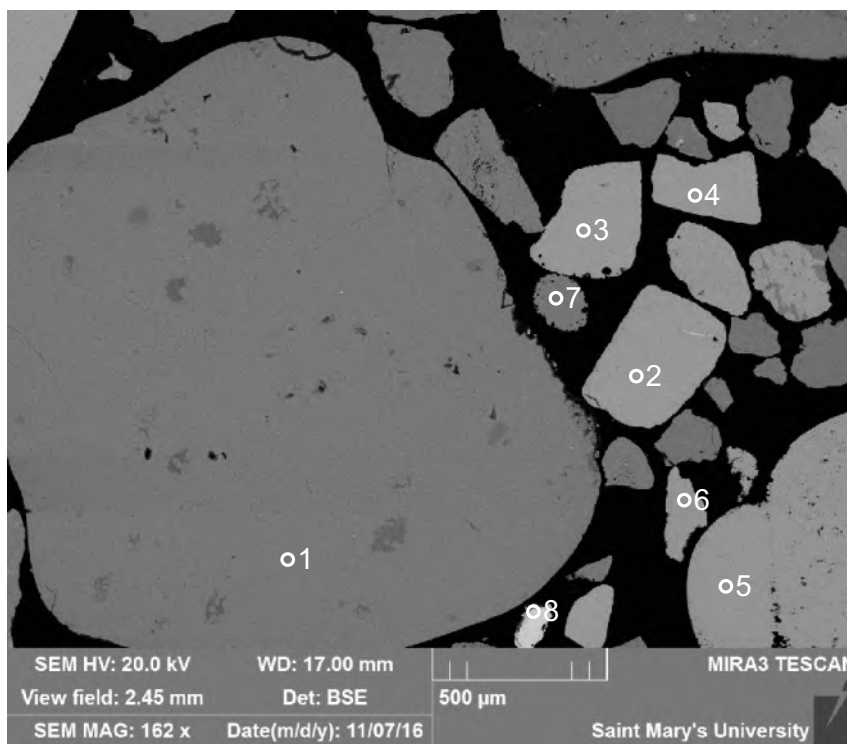

- 1: Quartz
- 2: Calcite
- 3: Calcite
- 4: Calcite
- 5: Calcite
- 6: Calcite
- 7: Quartz
- 8: Garnet (Almandine)

Figure A4.16: Sample S12 Site 12 (SEM). This site contains: Detrital quartz (1,7), calcite (2-6), and garnet (8).

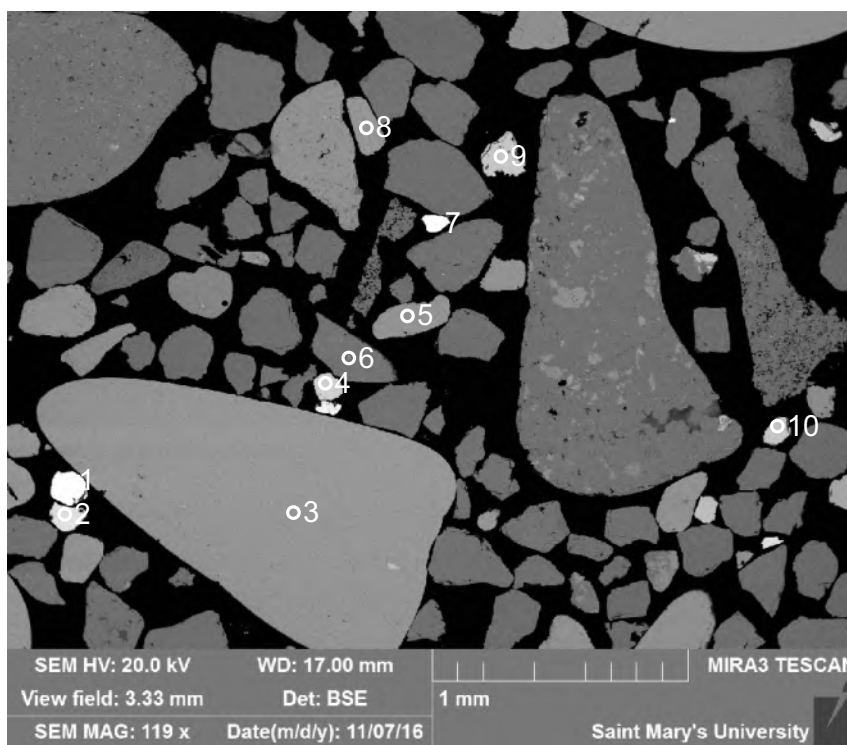

- 1: Chromite
- 2: Chromite
- 3: Calcite
- 4: Garnet (Almandine)
- 5: Calcite
- 6: Quartz+
- 7: Chromite
- 8: Calcite
- 9: Mix
- 10: Garnet (Almandine)

Figure A4.17: Sample S12 Site 13 (SEM). This site contains: Detrital chromite (1,2,7), garnet (4,10), calcite (3,5,8), and quartz (6).

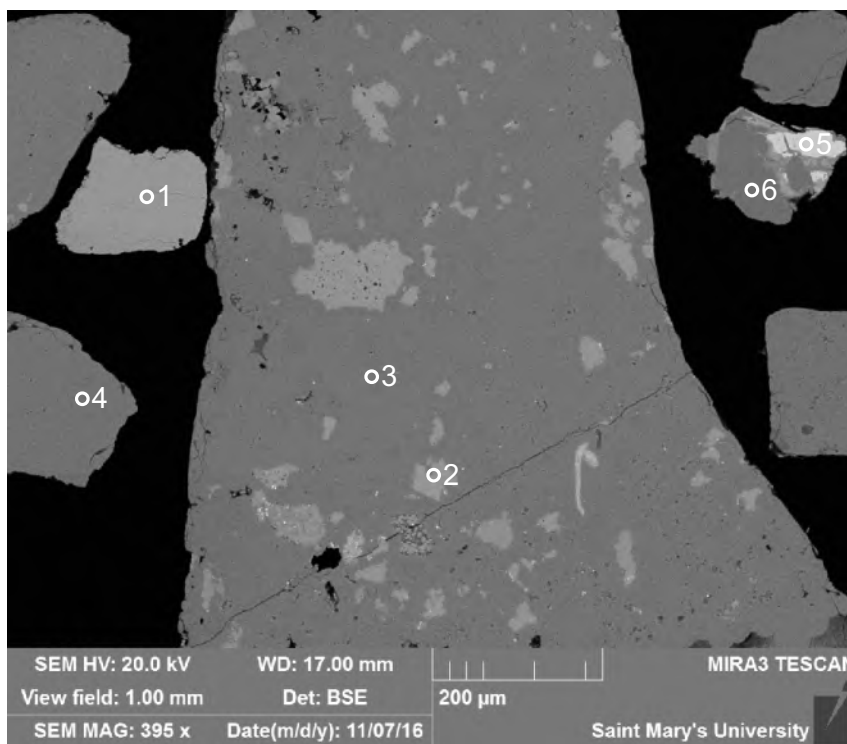

- 1: Calcite
- 2: Calcite
- 3: Quartz
- 4: Quartz
- 5: Garnet (Almandine)
- 6: Quartz

Figure A4.18: Sample S12 Site 14 (SEM). This site contains: Detrital quartz (3,4,6), calcite (1,2), and garnet (5). Lithic clast: Quartz + Calcite (2-3, chert).

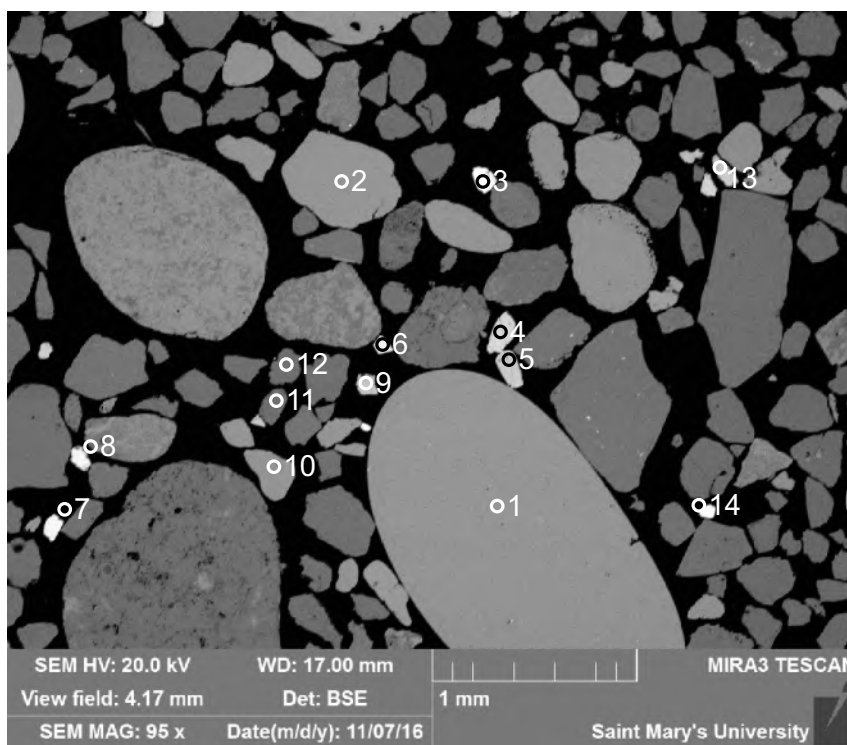

- 1: Calcite
- 2: Calcite
- 3: Chromite
- 4: Spinel
- 5: Garnet (Almandine)
- 6: Chromite
- 7: Chromite
- 8: Chromite
- 9: Garnet (Almandine)
- 10: Calcite
- 11: Quartz
- 12: Quartz
- 13: Spinel
- 14: Chromite

Figure A4.19: Sample S12 Site 15 (SEM). This site contains: Detrital calcite (1,2,10), quartz (11-12), chromite (3,6-8,14), spinel (4,13), and garnet (5,9).

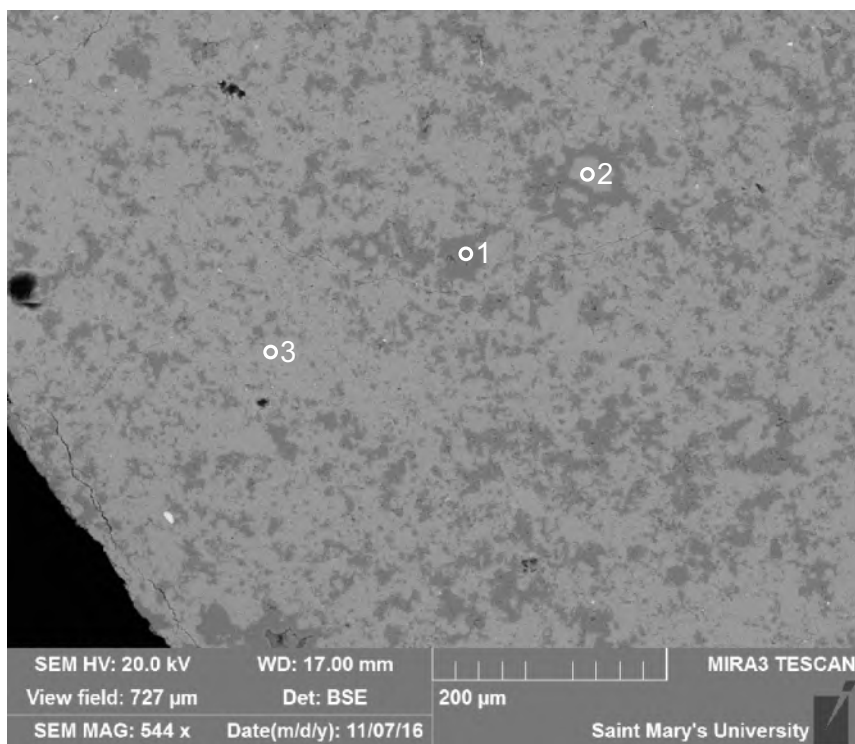

- 1: Quartz
- 2: Calcite
- 3: Calcite

Figure A4.20: Sample S12 Site 16 (SEM). This site contains: Detrital quartz (1) and calcite (2-3). Lithic clast: Quartz + Calcite (1-3, cherty limestone).

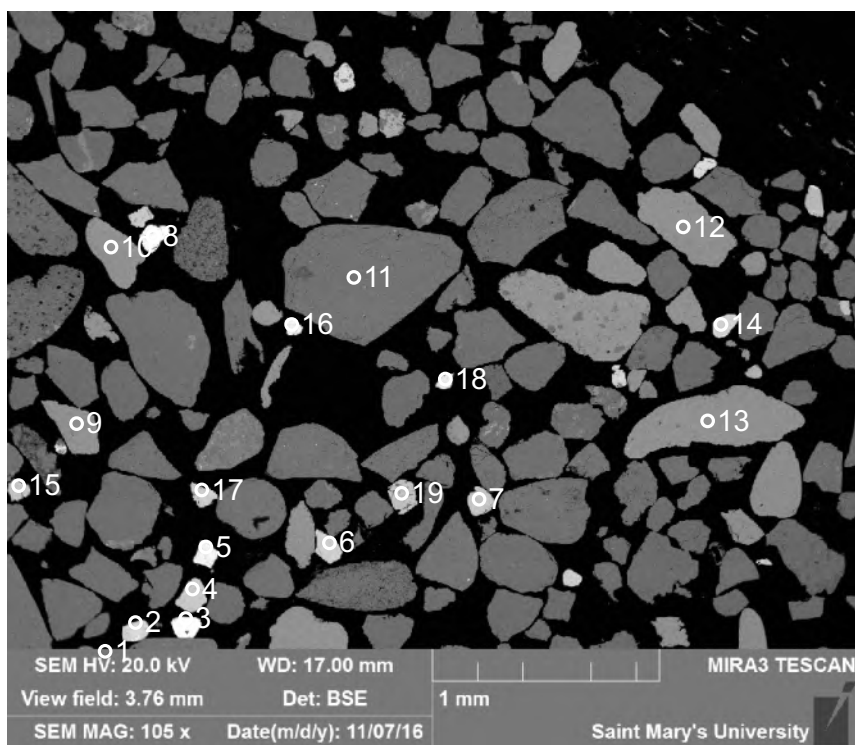

- 1: Chromite
- 2: Chromite
- 3: Chromite
- 4: Garnet (Almandine)
- 5: Chromite
- 6: Spinel
- 7: Garnet (Almandine)
- 8: Chromite
- 9: Calcite
- 10: Calcite
- 11: Quartz
- 12: Calcite
- 13: Calcite
- 14: Spinel
- 15: Garnet (Almandine)
- 16: Chromite
- 17: Spinel
- 18: Chromite
- 19: Garnet

Figure A4.21: Sample S12 Site 17 (SEM). This site contains: Detrital chromite (1-3,5,8,16,18), spinel (6,14,17), garnet (4,7,15,19), calcite (9-10, 12-13), and quartz (11).



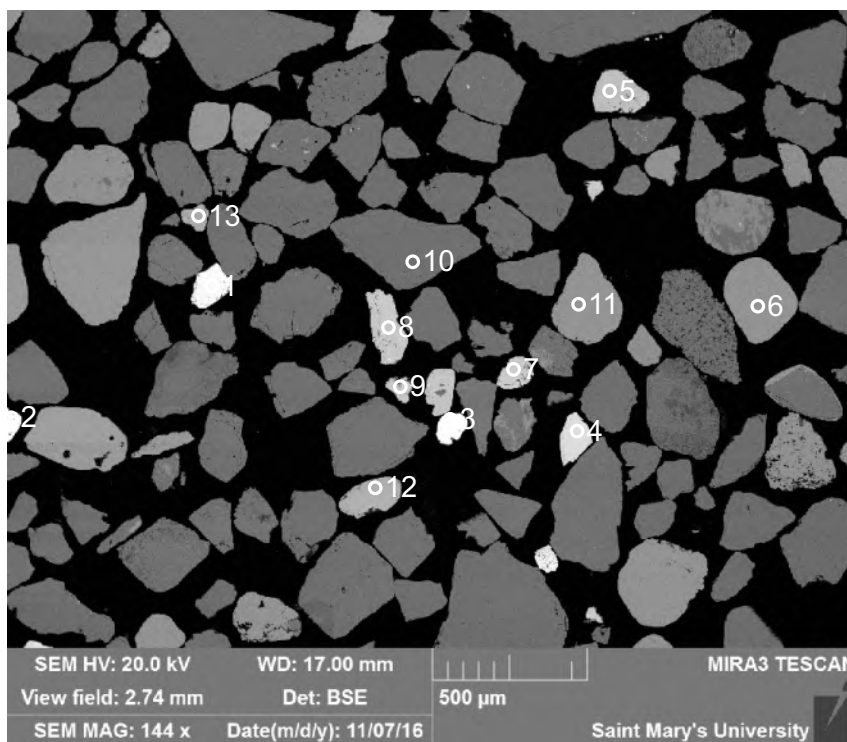

- 1: Chromite
- 2: Chromite
- 3: Chromite +
- 4: Chromite
- 5: Garnet (Almandine)
- 6: Calcite +
- 7: Garnet (Almandine)
- 8: Garnet (Almandine)
- 9: Garnet (Almandine)
- 10: Quartz
- 11: Calcite
- 12: Spinel
- 13: Epidote

Figure A4.22: Sample S12 Site 18 (SEM). This site contains: Detrital chromite (1-4), garnet (5,7-9), calcite (6,11), quartz (10), spinel (12), and epidote (13).

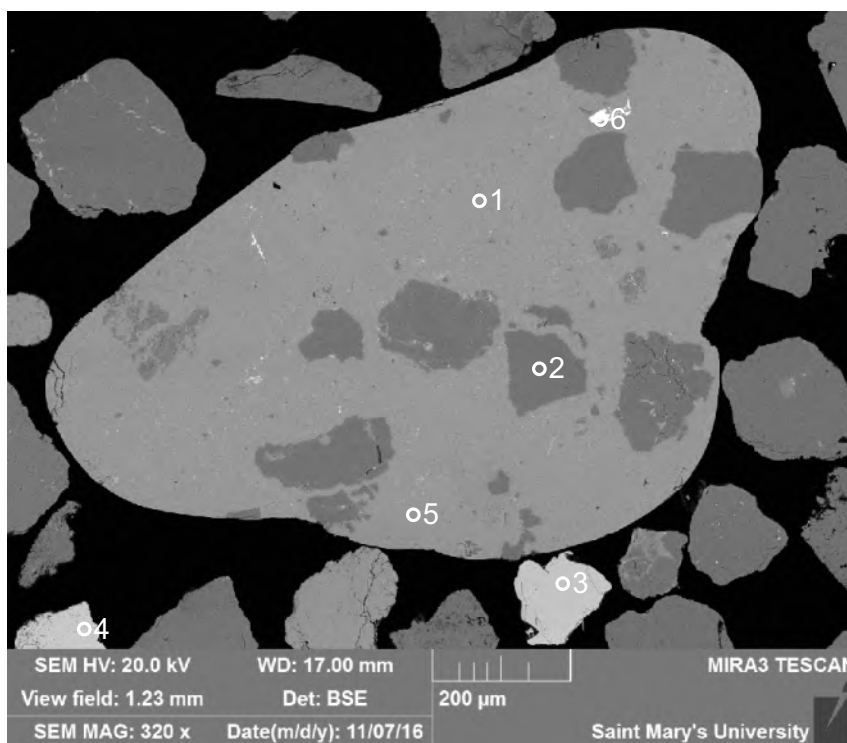

- 1: Calcite+
- 2: Quartz
- 3: Garnet (Almandine)
- 4: Garnet (Almandine)
- 5: Calcite
- 6: Ilmenite

Figure A4.23: Sample S12 Site 19 (SEM). This site contains: Detrital calcite (1, 5), quartz (2), ilmenite (6), and garnet (3-4). Lithic clast: Calcite + Quartz + Ilmenite (1-2,5-6, chert in sparry limestone).



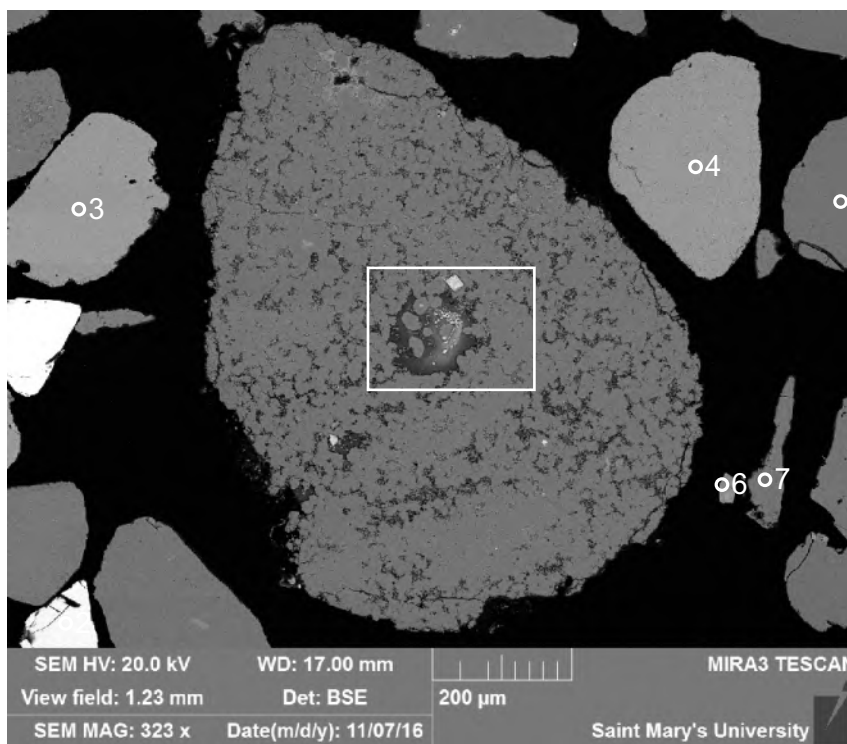

- 1: Chromite
- 2: Chromite
- 3: Calcite
- 4: Mix
- 5: Quartz
- 6: Anhydrite
- 7: Quartz

Figure A4.24: Sample S12 Site 20 (SEM). This site contains: Detrital chromite (1-2), calcite (3), and quartz (5,7). Anhydrite is also present (most likely from sea water).

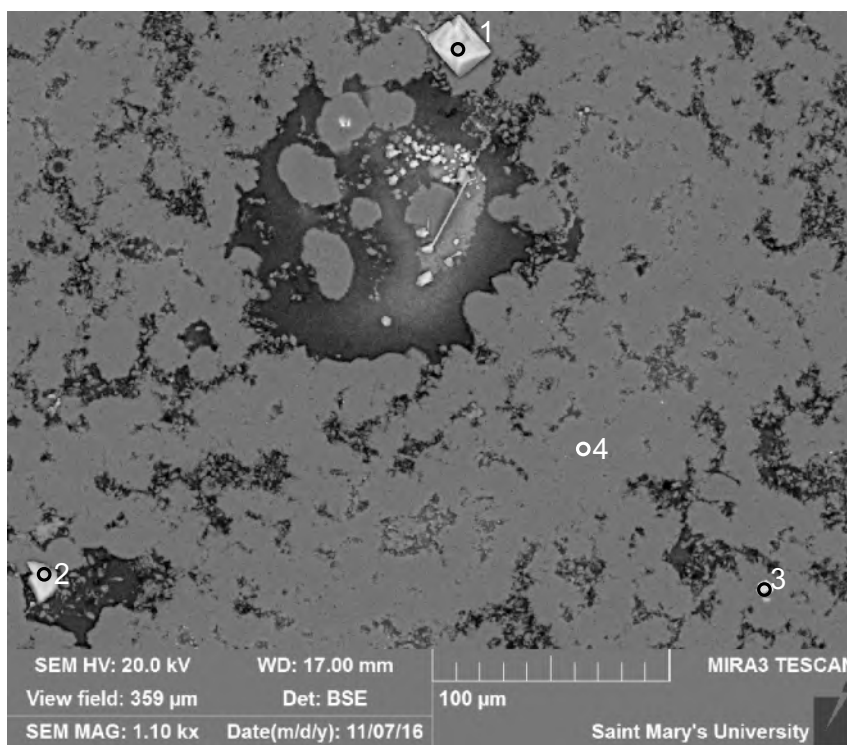

- 1: Halite
- 2: Halite +
- 3:  $\text{TiO}_2$  +
- 4: Quartz

Figure A4.25: Sample S12 Site 21 (SEM). This site contains: Detrital quartz (4),  $\text{TiO}_2$  (3), and halite (1-2) (probably from sea water). Lithic clast: Quartz + Halite + Titania (1-4, siltstone).

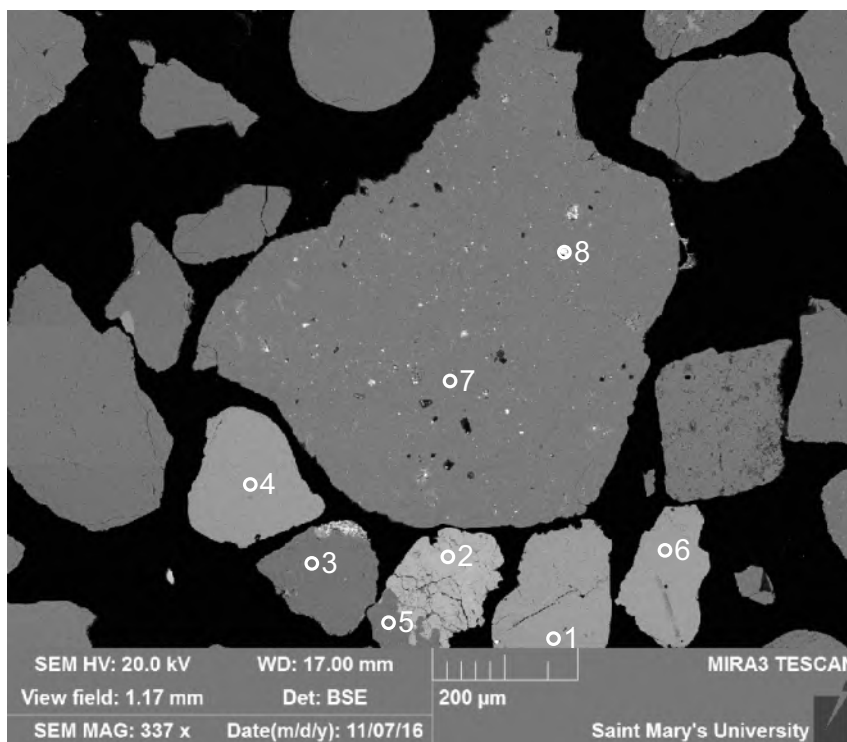

- 1: Calcite+
- 2: Epidote
- 3: Quartz
- 4: Calcite
- 5: Quartz
- 6: Calcite
- 7: Quartz
- 8: Pyrite

Figure A4.26: Sample S12 Site 22 (SEM). This site contains: Detrital quartz (3,5,7), pyrite (8), epidote (2), and calcite (1,4,6). Lithic clasts: Quartz + Pyrite (7-8, detrital quartz grain with pyrite inclusions); Quartz + Epidote (2,5, hydrothermal).

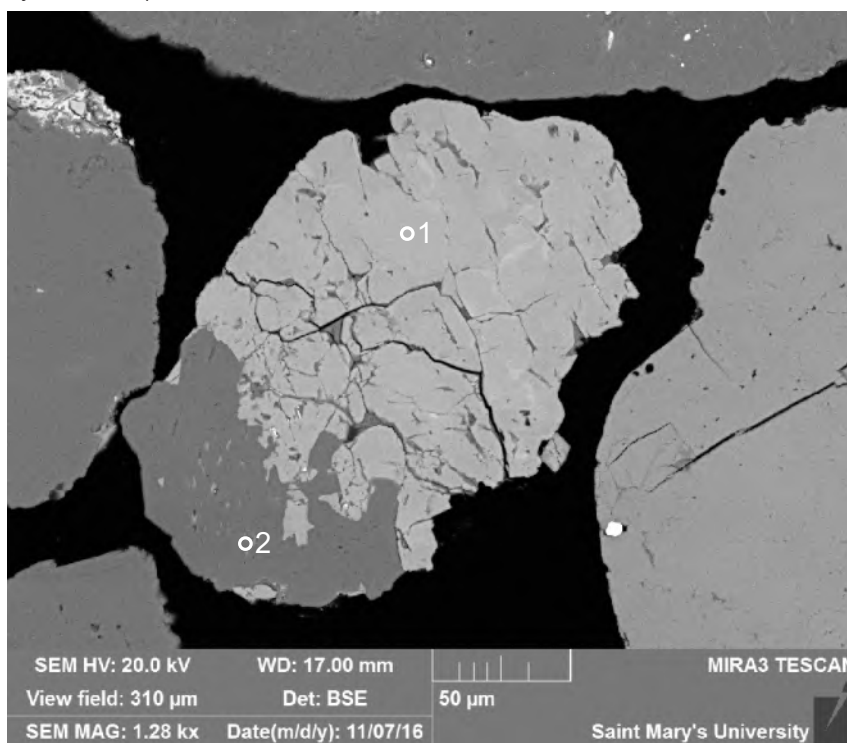

- 1: Epidote
- 2: Quartz

Figure A4.27: Sample S12 Site 23 (SEM). This site contains: Detrital quartz (2) and epidote (1). Lithic clast: Quartz + Epidote (1-2, quartz vein, hydrothermal).

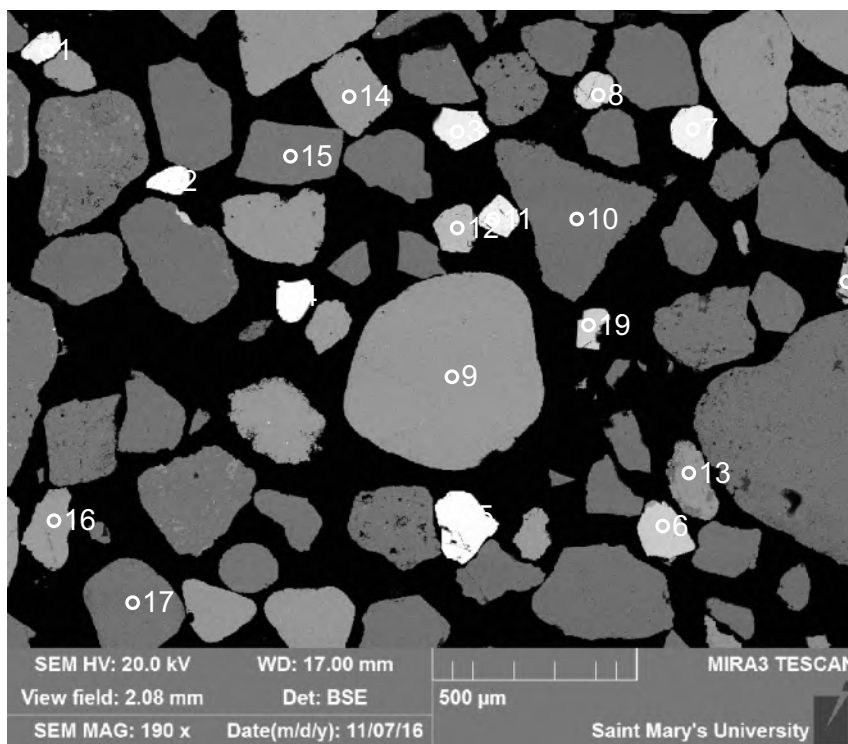

- 1: Chromite
- 2: Chromite
- 3: Chromite
- 4: Chromite
- 5: Chromite
- 6: Garnet (Almandine)
- 7: Chromite
- 8: Garnet (Almandine)
- 9: Calcite
- 10: Quartz
- 11: Chromite
- 12: Spinel
- 13: Calcite+
- 14: Calcite
- 15: Quartz
- 16: Calcite
- 17: Quartz +
- 18: Garnet (Almandine)
- 19: Garnet (Almandine)

Figure A4.28: Sample S12 Site 24(SEM). This site contains: Detrital chromite (1-5,7,11), garnet (6,8,18-19), calcite (9,13,14,16), spinel (12), and quartz (10,15,17).

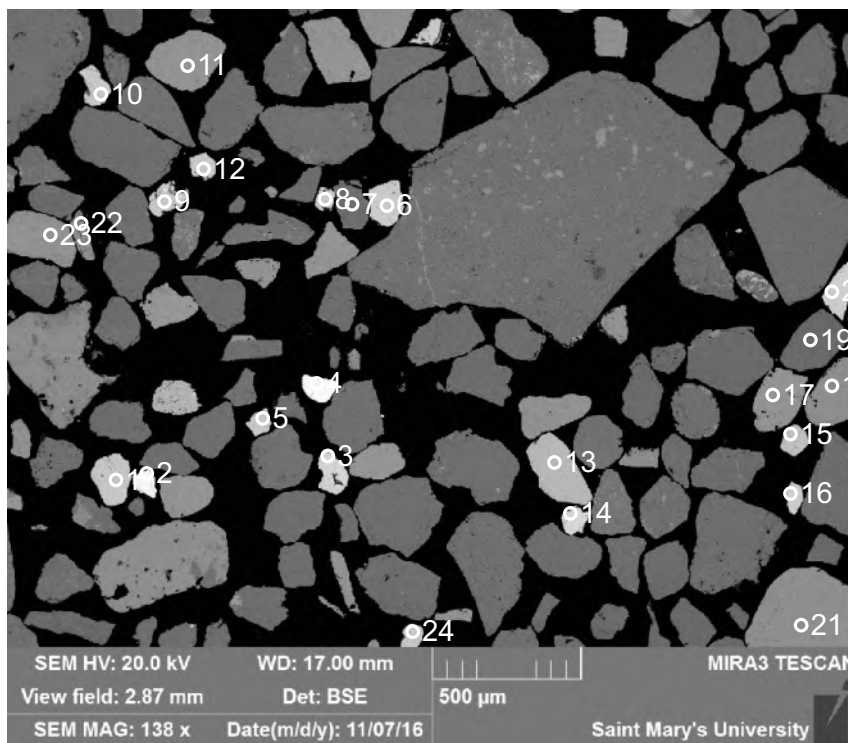

- 1: Garnet (Almandine)
- 2: Chromite
- 3: Spinel
- 4: Chromite
- 5: Garnet (Almandine)
- 6: Garnet (Almandine)
- 7: Quartz
- 8: Garnet (Almandine)
- 9: Garnet (Almandine)
- 10: Garnet (Almandine)
- 11: Calcite
- 12: Garnet (Almandine)
- 13: Spinel
- 14: Spinel
- 15: Garnet (Almandine)
- 16: Spinel
- 17: Calcite
- 18: Calcite
- 19: Quartz
- 20: Spinel
- 21: Calcite
- 22: K-Feldspar
- 23: Calcite
- 24: Garnet (Almandine)

Figure A4.29: Sample S12 Site 25 (SEM). This site contains: Detrital garnet (1,5,6,8-10,12,15,24), chromite (2,4), spinel (13,14,16,20), quartz (7,19), calcite (11,17,18,21,23), and K-feldspar (22).



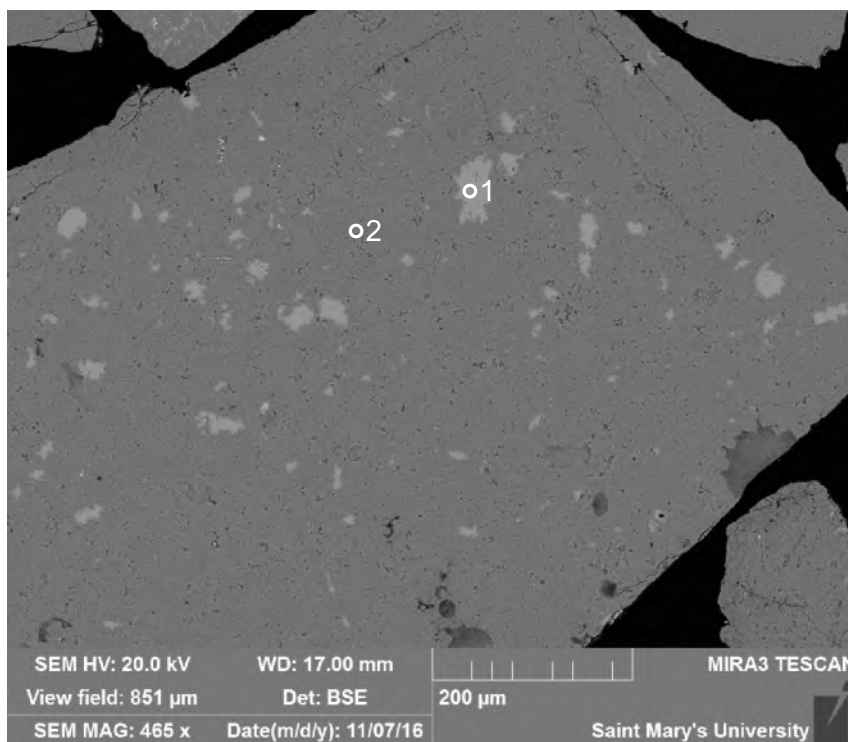

- 1: Calcite
- 2: Quartz

Figure A4.30: Sample S12 Site 26 (SEM). This site contains: Detrital calcite (1) and quartz (2). Lithic clast: Quartz + Calcite (1-2, chert with residual calcite).

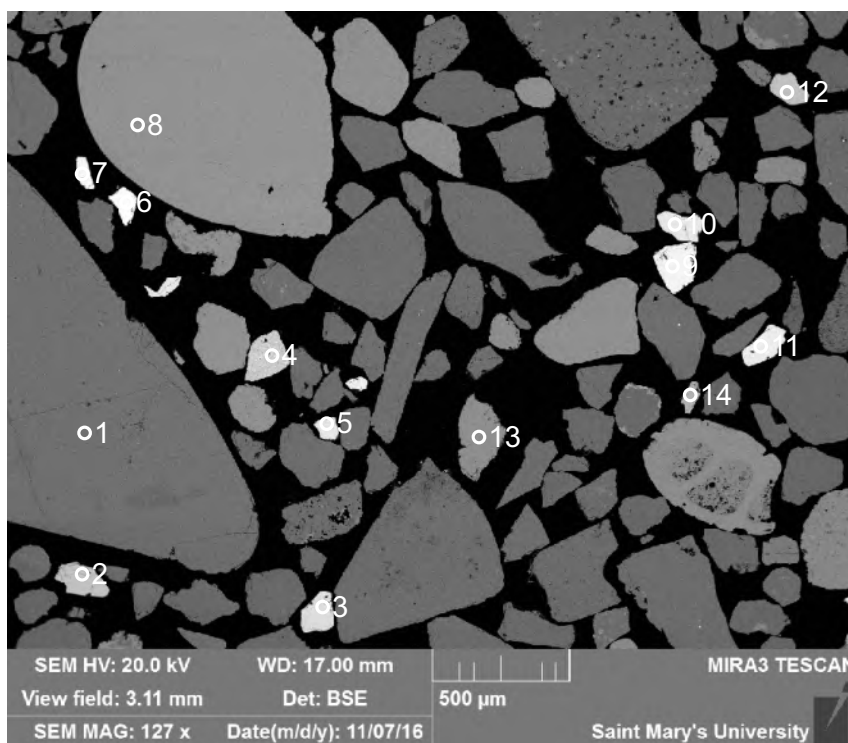

- 1: Quartz
- 2: Garnet (Almandine)
- 3: Chromite
- 4: Titanite +
- 5: Chromite
- 6: Chromite
- 7: Chromite
- 8: Calcite
- 9: Chromite
- 10: Chromite
- 11: Chromite
- 12: Garnet (Almandine)
- 13: Calcite
- 14: Garnet (Almandine)

Figure A4.31: Sample S12 Site 27 (SEM). This site contains: Detrital quartz (1), calcite (8,13), garnet (2,12,14), chromite (3,5-7,9-11), and titanite (4).



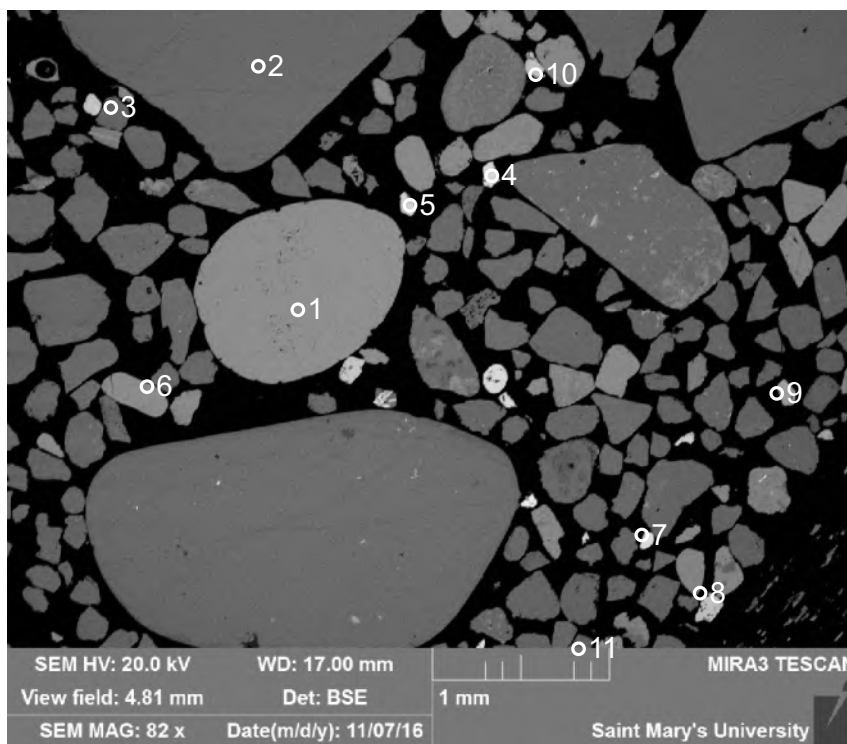

- 1: Calcite
- 2: Quartz
- 3: Titanite
- 4: Chromite
- 5: Chromite
- 6: Calcite+
- 7: Chromite
- 8: Chromite
- 9: Spinel
- 10: Garnet (Almandine)
- 11: Chromite

Figure A4.32: Sample S12 Site 28 (SEM). This site contains: Detrital calcite (1,6), quartz (2), chromite (4-5,7-8,11), spinel (9), garnet (10), and titanite (3).

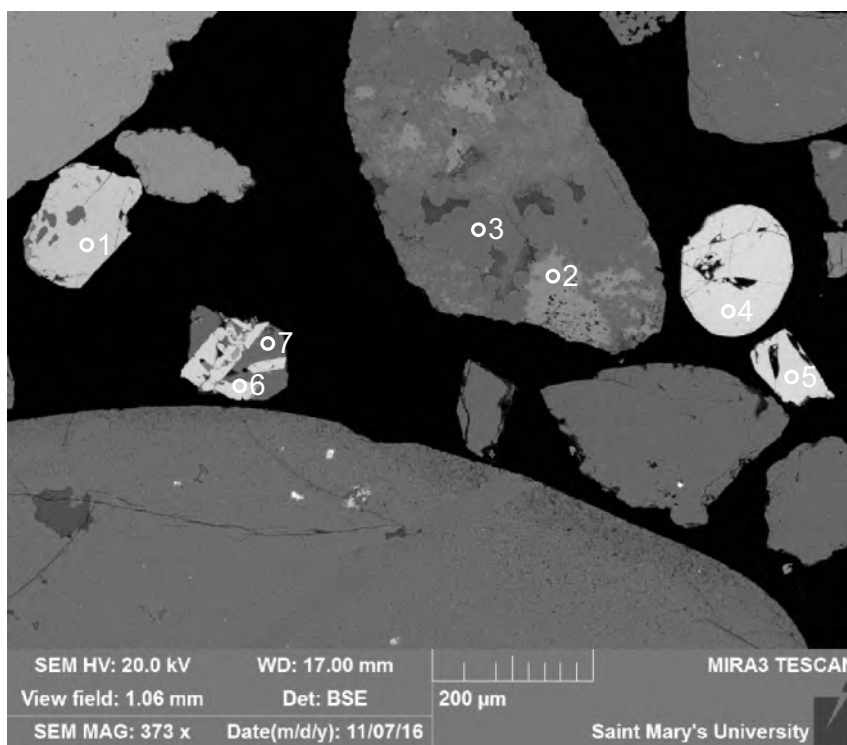

- 1: Garnet (Almandine)
- 2: Calcite
- 3: Quartz
- 4: Spinel
- 5: Spinel
- 6:  $\text{TiO}_2$
- 7: Quartz

Figure A4.33: Sample S12 Site 29 (SEM). This site contains: Detrital garnet (1), spinel (4, 5), quartz (3,7),  $\text{TiO}_2$  (6), and calcite (2). Lithic clasts: Quartz + Calcite (2-3, chert with residual calcite); Quartz +  $\text{TiO}_2$  (6-7, metamorphic).

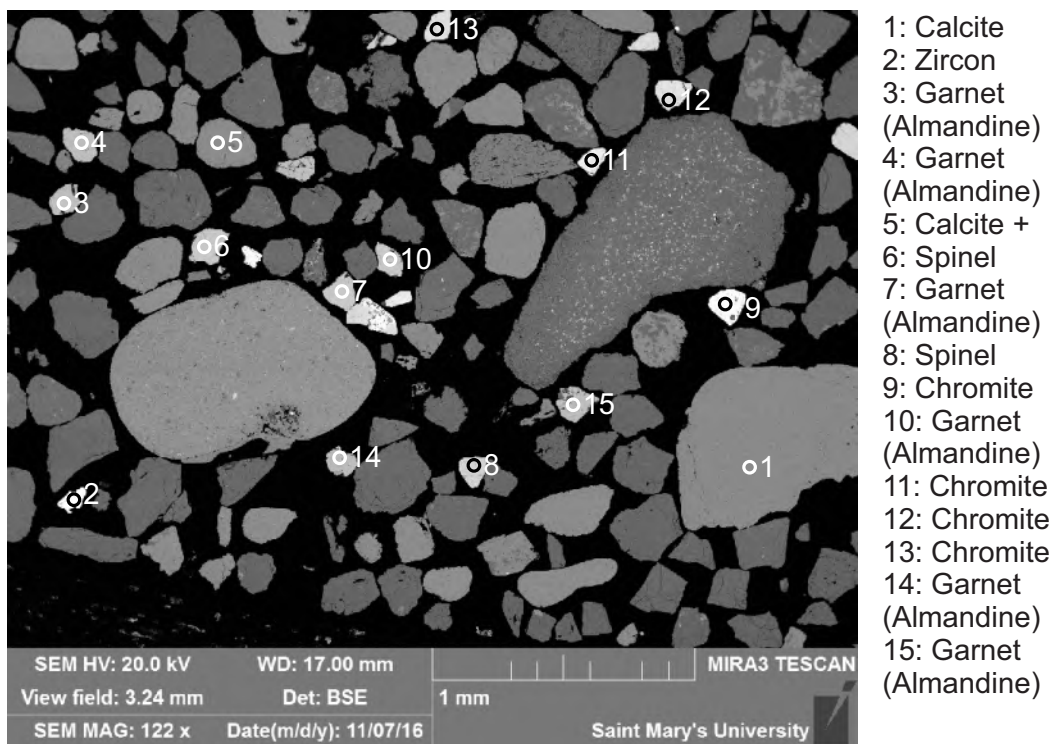

Figure A4.34: Sample S12 Site 30 (SEM). This site contains: Detrital calcite (1,5), garnet (3,4,7,10,14,15), chromite (9,11-13), spinel (6,8), and zircon (2).

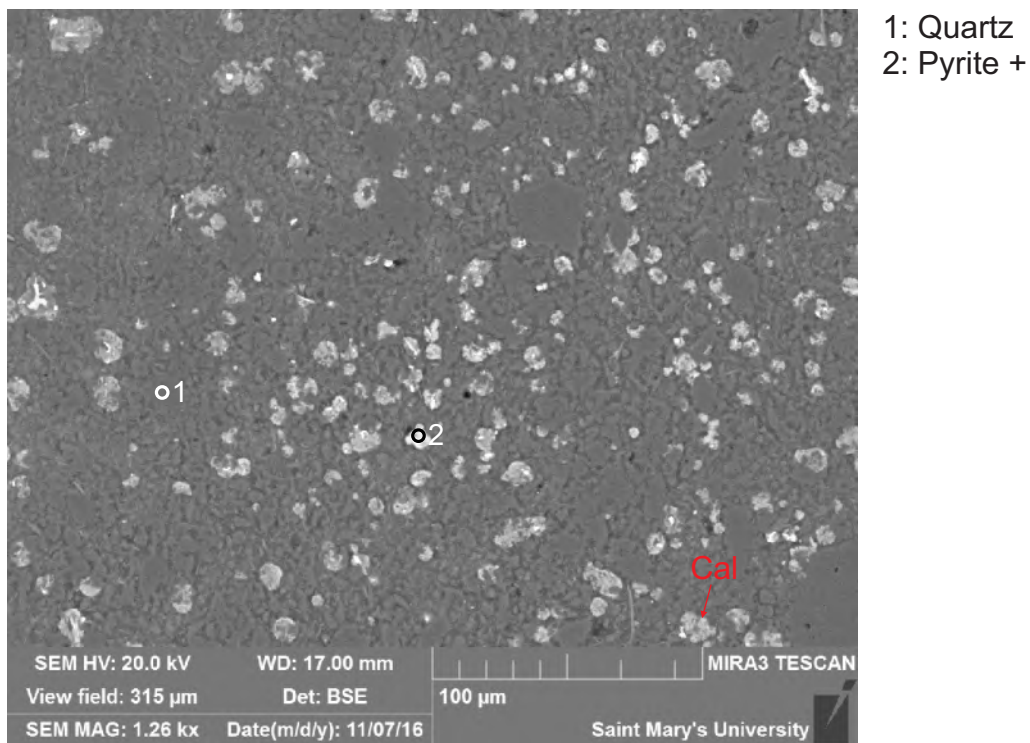

Figure A4.35: Sample S12 Site 31 (SEM). This site contains: Detrital quartz (1), pyrite (2), and calcite. Lithic clast: Quartz + Calcite + Pyrite (1-2, chert with residual calcite).

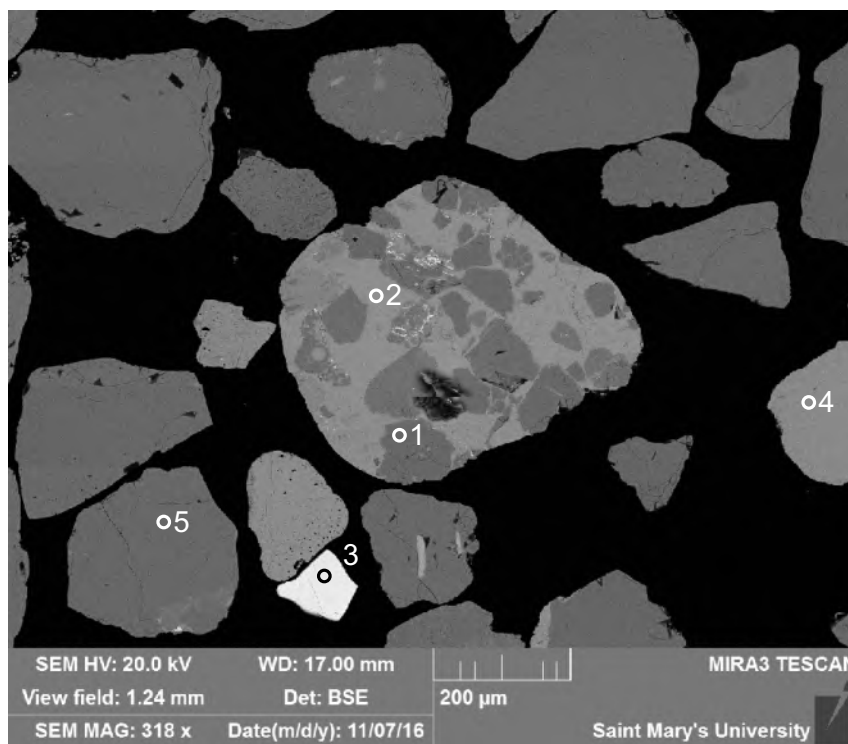

- 1: Quartz
- 2: Calcite
- 3: Chromite
- 4: Calcite
- 5: Quartz

Figure A4.36: Sample S12 Site 32 (SEM). This site contains: Detrital calcite (2,4), quartz (1,5), and spinel (3). Lithic clast: Quartz + Calcite (1-2, cherty limestone).

Table A4.1: EDS analyses of sample S12.

| Sample | Site | Position | Mineral    | SiO2  | TiO2  | Al2O3 | FeO   | MnO  | MgO   | CaO   | Na2O | K2O  | P2O5 | SO3  | F | Cl   | V2O5 | Cr2O3 | ZnO | SrO  | ZrO2 | BaO  | WO3 | Total | Actual Total |     |
|--------|------|----------|------------|-------|-------|-------|-------|------|-------|-------|------|------|------|------|---|------|------|-------|-----|------|------|------|-----|-------|--------------|-----|
| S12    | 1    | 1        | Qz         | 100   |       |       |       |      |       |       |      |      |      |      |   |      |      |       |     |      |      |      |     | 100   | 108          |     |
| S12    | 1    | 2        | Cal        |       |       |       |       |      | 0.30  | 53.61 | 0.52 |      |      | 0.71 |   |      |      |       |     | 0.87 |      |      |     |       | 56           | 53  |
| S12    | 1    | 3        | Cal        |       |       |       | 0.41  |      | 1.18  | 54.41 |      |      |      |      |   |      |      |       |     |      |      |      |     |       | 56           | 53  |
| S12    | 1    | 4        | Cal        |       |       |       |       |      |       | 55.26 | 0.74 |      |      |      |   |      |      |       |     |      |      |      |     |       | 56           | 54  |
| S12    | 1    | 5        | Kfs        | 65.96 |       | 17.97 |       |      |       |       | 0.46 | 15.6 |      |      |   |      |      |       |     |      |      |      |     |       | 100          | 110 |
| S12    | 1    | 6        | Qz         | 100   |       |       |       |      |       |       |      |      |      |      |   |      |      |       |     |      |      |      |     |       | 100          | 113 |
| S12    | 1    | 7        | Cal        | 1.00  |       |       |       |      |       | 55.00 |      |      |      |      |   |      |      |       |     |      |      |      |     |       | 56           | 55  |
| S12    | 1    | 8        | Qz         | 100   |       |       |       |      |       |       |      |      |      |      |   |      |      |       |     |      |      |      |     |       | 100          | 112 |
| S12    | 1    | 9        | Qz         | 100   |       |       |       |      |       |       |      |      |      |      |   |      |      |       |     |      |      |      |     |       | 100          | 114 |
| S12    | 1    | 10       | Qz         | 99.46 |       | 0.54  |       |      |       |       |      |      |      |      |   |      |      |       |     |      |      |      |     |       | 100          | 111 |
| S12    | 2    | 1        | Chr        |       |       | 8.81  | 21.03 |      | 8.83  |       |      |      |      |      |   |      |      | 61.3  |     |      |      |      |     |       | 100          | 98  |
| S12    | 2    | 2        | TiO2       |       | 98.32 |       | 1.68  |      |       |       |      |      |      |      |   |      |      |       |     |      |      |      |     |       | 100          | 101 |
| S12    | 2    | 3        | Cal        |       |       |       |       |      | 0.63  | 55.37 |      |      |      |      |   |      |      |       |     |      |      |      |     |       | 56           | 54  |
| S12    | 2    | 4        | Qz         | 100   |       |       |       |      |       |       |      |      |      |      |   |      |      |       |     |      |      |      |     |       | 100          | 111 |
| S12    | 2    | 5        | Kifs       | 66.06 |       | 17.77 |       |      |       |       | 0.53 | 15.6 |      |      |   |      |      |       |     |      |      |      |     |       | 100          | 108 |
| S12    | 2    | 6        | Qz         | 98.98 |       | 0.66  |       |      |       |       |      | 0.37 |      |      |   |      |      |       |     |      |      |      |     |       | 100          | 112 |
| S12    | 3    | 1        | Py         | 0.41  |       |       | 28.13 |      |       |       | 0.92 |      |      | 70.5 |   |      |      |       |     |      |      |      |     |       | 100          | 212 |
| S12    | 3    | 2        | Py         | 1.17  |       |       | 25.96 |      |       |       | 0.27 |      |      | 68.2 |   |      |      |       |     |      |      | 4.45 |     |       | 100          | 200 |
| S12    | 3    | 3        | Cal+       | 3.75  |       | 0.8   | 2.7   |      | 1.9   | 90.85 |      |      |      |      |   |      |      |       |     |      |      |      |     |       | 100          | 56  |
| S12    | 3    | 4        | Qz         | 100   |       |       |       |      |       |       |      |      |      |      |   |      |      |       |     |      |      |      |     |       | 100          | 113 |
| S12    | 3    | 5        | Ms + Chl + | 39.2  | 3.71  | 22.12 | 18.13 | 0.42 | 9.94  | 0.59  | 0.83 | 4.16 |      | 0.73 |   | 0.18 |      |       |     |      |      |      |     |       | 100          | 96  |
| S12    | 3    | 6        | Py         | 0.5   |       |       | 28.47 |      |       |       | 0.21 |      |      | 70.8 |   |      |      |       |     |      |      |      |     |       | 100          | 220 |
| S12    | 4    | 1        | Cal+       | 3.9   |       | 0.66  | 0.66  |      | 0.88  | 93.91 |      |      |      |      |   |      |      |       |     |      |      |      |     |       | 100          | 55  |
| S12    | 4    | 2        | Grt (Alm)  | 40.14 |       | 21.61 | 27.25 | 1.64 | 7.89  | 1.48  |      |      |      |      |   |      |      |       |     |      |      |      |     |       | 100          | 104 |
| S12    | 4    | 3        | Spl        |       |       | 32.06 | 17.9  |      | 14.62 |       |      |      |      |      |   |      |      | 35.4  |     |      |      |      |     |       | 100          | 105 |
| S12    | 4    | 4        | Grt (Alm)  | 39.59 |       | 20.93 | 29.22 | 0.33 | 2.55  | 7.39  |      |      |      |      |   |      |      |       |     |      |      |      |     |       | 100          | 111 |
| S12    | 4    | 5        | Spl        |       | 0.73  | 26.53 | 30.54 |      | 10.87 |       |      |      |      |      |   |      | 0.4  | 30.9  |     |      |      |      |     |       | 100          | 106 |
| S12    | 4    | 6        | Grt (Alm)  | 40.13 |       | 20.62 | 27.06 | 0.6  | 3.72  | 7.87  |      |      |      |      |   |      |      |       |     |      |      |      |     |       | 100          | 108 |
| S12    | 4    | 7        | TiO2       |       | 99.4  |       | 0.6   |      |       |       |      |      |      |      |   |      |      |       |     |      |      |      |     |       | 100          | 104 |
| S12    | 4    | 8        | Cal        |       |       |       |       | 0.75 | 6.06  | 92.25 |      |      |      | 0.94 |   |      |      |       |     |      |      |      |     |       | 100          | 53  |
| S12    | 4    | 9        | Qz         | 100   |       |       |       |      |       |       |      |      |      |      |   |      |      |       |     |      |      |      |     |       | 100          | 115 |
| S12    | 4    | 10       | Qz         | 100   |       |       |       |      |       |       |      |      |      |      |   |      |      |       |     |      |      |      |     |       | 100          | 118 |



Table A4.1: EDS analyses of sample S12.

| Sample | Site | Position | Mineral   | SiO2  | TiO2 | Al2O3 | FeO   | MnO  | MgO   | CaO   | Na2O | K2O  | P2O5 | SO3  | F | Cl | V2O5 | Cr2O3 | ZnO | SrO | ZrO2 | BaO  | WO3 | Total | Actual Total |
|--------|------|----------|-----------|-------|------|-------|-------|------|-------|-------|------|------|------|------|---|----|------|-------|-----|-----|------|------|-----|-------|--------------|
| S12    | 5    | 1        | Qz        | 99.53 |      |       | 0.47  |      |       |       |      |      |      |      |   |    |      |       |     |     |      |      |     | 100   | 112          |
| S12    | 5    | 2        | Grt (Alm) | 40.1  |      | 20.88 | 26.96 | 0.47 | 3.82  | 7.77  |      |      |      |      |   |    |      |       |     |     |      |      |     | 100   | 105          |
| S12    | 6    | 1        | Spl       |       |      | 32.68 | 17.56 |      | 14.89 |       |      |      |      |      |   |    |      | 34.9  |     |     |      |      |     | 100   | 94           |
| S12    | 6    | 2        | Grt (Alm) | 39.66 |      | 20.98 | 30.41 | 3.4  | 4.27  | 1.27  |      |      |      |      |   |    |      |       |     |     |      |      |     | 100   | 104          |
| S12    | 6    | 3        | Kfs       | 65.44 |      | 17.88 |       |      |       |       | 0.87 | 15   |      |      |   |    |      |       |     |     |      | 0.83 |     | 100   | 108          |
| S12    | 6    | 4        | Chr       |       | 0.55 | 19.21 | 29.74 |      | 8.03  |       |      |      |      |      |   |    | 0.44 | 42    |     |     |      |      |     | 100   | 105          |
| S12    | 6    | 5        | Chr       |       | 0.49 | 26.9  | 28.19 |      | 11.17 |       |      |      |      |      |   |    |      | 33.3  |     |     |      |      |     | 100   | 96           |
| S12    | 6    | 6        | Chr       |       |      | 15.42 | 24.01 |      | 9.07  |       |      |      |      |      |   |    |      | 51.5  |     |     |      |      |     | 100   | 98           |
| S12    | 6    | 7        | Grt (Alm) | 39.77 |      | 21.2  | 28.88 | 0.36 | 2.42  | 7.37  |      |      |      |      |   |    |      |       |     |     |      |      |     | 100   | 99           |
| S12    | 6    | 8        | Spl       |       | 0.75 | 27.23 | 30.23 |      | 11.09 |       |      |      |      |      |   |    |      | 30.7  |     |     |      |      |     | 100   | 93           |
| S12    | 6    | 9        | Chr       |       |      | 18.31 | 18.05 |      | 11.77 |       |      |      |      |      |   |    |      | 51.9  |     |     |      |      |     | 100   | 96           |
| S12    | 6    | 10       | Chr       |       |      | 19.4  | 24.44 |      | 10.65 |       |      |      |      |      |   |    |      | 45.5  |     |     |      |      |     | 100   | 98           |
| S12    | 6    | 11       | Cal       |       |      |       |       |      | 0.58  | 55.42 |      |      |      |      |   |    |      |       |     |     |      |      |     | 56    | 53           |
| S12    | 6    | 12       | Qz        | 100   |      |       |       |      |       |       |      |      |      |      |   |    |      |       |     |     |      |      |     | 100   | 111          |
| S12    | 7    | 1        | Qz        | 99.78 |      |       |       |      |       | 0.22  |      |      |      |      |   |    |      |       |     |     |      |      |     | 100   | 114          |
| S12    | 7    | 2        | Cal       |       |      |       |       |      |       | 55.31 | 0.69 |      |      |      |   |    |      |       |     |     |      |      |     | 56    | 53           |
| S12    | 7    | 3        | Qz        | 100   |      |       |       |      |       |       |      |      |      |      |   |    |      |       |     |     |      |      |     | 100   | 111          |
| S12    | 8    | 1        | Ab        | 69.37 |      | 18.74 |       |      |       | 0.32  | 11.6 |      |      |      |   |    |      |       |     |     |      |      |     | 100   | 108          |
| S12    | 8    | 2        | Cal+      | 12.04 |      | 3.98  | 4.41  |      | 4.01  | 74.32 |      | 0.51 |      | 0.72 |   |    |      |       |     |     |      |      |     | 100   | 58           |
| S12    | 8    | 3        | Chl       | 26.18 |      | 20.82 | 21.83 | 0.32 | 14.91 | 0.94  |      |      |      |      |   |    |      |       |     |     |      |      |     | 85    | 91           |
| S12    | 8    | 4        | Qz        | 99.17 |      | 0.36  |       |      |       | 0.26  | 0.21 |      |      |      |   |    |      |       |     |     |      |      |     | 100   | 112          |
| S12    | 8    | 5        | Qz        | 97.29 |      | 1.34  | 0.24  |      |       | 0.69  |      | 0.43 |      |      |   |    |      |       |     |     |      |      |     | 100   | 111          |
| S12    | 8    | 6        | Qz        | 99.6  |      |       |       |      |       | 0.4   |      |      |      |      |   |    |      |       |     |     |      |      |     | 100   | 112          |
| S12    | 9    | 1        | Qz        | 100   |      |       |       |      |       |       |      |      |      |      |   |    |      |       |     |     |      |      |     | 100   | 106          |
| S12    | 9    | 2        | Cal       |       |      |       |       |      | 0.38  | 55.62 |      |      |      |      |   |    |      |       |     |     |      |      |     | 56    | 52           |
| S12    | 9    | 3        | Cal       |       |      |       |       |      | 0.41  | 55.59 |      |      |      |      |   |    |      |       |     |     |      |      |     | 56    | 52           |
| S12    | 9    | 4        | Spl       |       |      | 51.44 | 13.31 |      | 18.9  |       |      |      |      |      |   |    |      | 16.4  |     |     |      |      |     | 100   | 96           |
| S12    | 9    | 5        | Ep        | 40.75 |      | 27.1  | 6.528 |      |       | 22.62 |      |      |      |      |   |    |      |       |     |     |      |      |     | 97    | 102          |
| S12    | 9    | 6        | Chr       |       |      | 26.23 | 17.92 |      | 13.71 |       |      |      |      |      |   |    |      | 42.1  |     |     |      |      |     | 100   | 107          |
| S12    | 9    | 7        | Kfs       | 65.95 |      | 18    |       |      |       |       | 0.59 | 15.5 |      |      |   |    |      |       |     |     |      |      |     | 100   | 106          |
| S12    | 9    | 8        | Qz        | 100   |      |       |       |      |       |       |      |      |      |      |   |    |      |       |     |     |      |      |     | 100   | 107          |
| S12    | 9    | 9        | Cal       |       |      |       |       |      |       | 54.96 | 1.04 |      |      |      |   |    |      |       |     |     |      |      |     | 56    | 47           |

Table A4.1: EDS analyses of sample S12.

| Sample | Site | Position | Mineral   | SiO2  | TiO2  | Al2O3 | FeO   | MnO  | MgO   | CaO   | Na2O | K2O  | P2O5 | SO3 | F | Cl   | V2O5 | Cr2O3 | ZnO | SrO | ZrO2 | BaO | WO3  | Total | Actual Total |
|--------|------|----------|-----------|-------|-------|-------|-------|------|-------|-------|------|------|------|-----|---|------|------|-------|-----|-----|------|-----|------|-------|--------------|
| S12    | 10   | 1        | Grt (Alm) | 39.63 |       | 20.68 | 30.23 | 2.58 | 3.75  | 3.13  |      |      |      |     |   |      |      |       |     |     |      |     |      | 100   | 107          |
| S12    | 10   | 2        | Cal       |       |       |       |       |      |       | 55.09 | 0.91 |      |      |     |   |      |      |       |     |     |      |     |      | 56    | 54           |
| S12    | 10   | 3        | Cal       |       |       |       |       |      | 0.45  | 55.55 |      |      |      |     |   |      |      |       |     |     |      |     |      | 56    | 50           |
| S12    | 10   | 4        | Qz        | 97.86 |       | 0.74  | 0.82  |      | 0.34  |       |      | 0.23 |      |     |   |      |      |       |     |     |      |     |      | 100   | 102          |
| S12    | 10   | 5        | Kfs       | 66.06 |       | 17.68 |       |      |       |       | 0.51 | 15.7 |      |     |   |      |      |       |     |     |      |     |      | 100   | 108          |
| S12    | 11   | 1        | Ap        |       |       |       | 0.36  |      |       | 49.04 |      |      | 44.9 |     | 3 | 0.92 |      |       |     |     |      |     | 1.75 | 100   | 111          |
| S12    | 11   | 2        | Kfs       | 65.23 |       | 22.54 | 1.31  |      | 0.42  | 0.4   | 7.41 | 2.68 |      |     |   |      |      |       |     |     |      |     |      | 100   | 101          |
| S12    | 11   | 3        | Qz        | 97.19 |       | 1.66  | 0.2   |      |       |       | 0.52 | 0.44 |      |     |   |      |      |       |     |     |      |     |      | 100   | 110          |
| S12    | 11   | 4        | Qz        | 99.48 |       | 0.52  |       |      |       |       |      |      |      |     |   |      |      |       |     |     |      |     |      | 100   | 110          |
| S12    | 12   | 1        | Qz        | 100   |       |       |       |      |       |       |      |      |      |     |   |      |      |       |     |     |      |     |      | 100   | 108          |
| S12    | 12   | 2        | Cal       | 0.82  |       |       |       |      | 0.60  | 54.58 |      |      |      |     |   |      |      |       |     |     |      |     |      | 56    | 54           |
| S12    | 12   | 3        | Cal       | 0.45  |       |       |       |      | 0.66  | 54.89 |      |      |      |     |   |      |      |       |     |     |      |     |      | 56    | 52           |
| S12    | 12   | 4        | Cal       |       |       |       |       |      | 0.58  | 55.42 |      |      |      |     |   |      |      |       |     |     |      |     |      | 56    | 50           |
| S12    | 12   | 5        | Cal       | 0.46  |       |       |       |      | 0.39  | 55.15 |      |      |      |     |   |      |      |       |     |     |      |     |      | 56    | 57           |
| S12    | 12   | 6        | Cal       |       |       |       |       |      | 0.46  | 55.54 |      |      |      |     |   |      |      |       |     |     |      |     |      | 56    | 55           |
| S12    | 12   | 7        | Qz        | 99.54 |       |       |       |      | 0.46  |       |      |      |      |     |   |      |      |       |     |     |      |     |      | 100   | 109          |
| S12    | 12   | 8        | Grt (Alm) | 39.68 |       | 21.04 | 30.61 | 0.41 | 3.49  | 4.76  |      |      |      |     |   |      |      |       |     |     |      |     |      | 100   | 109          |
| S12    | 13   | 1        | Chr       |       |       | 9.87  | 29.4  |      | 7.79  |       |      |      |      |     |   |      |      | 53    |     |     |      |     |      | 100   | 85           |
| S12    | 13   | 2        | Chr       |       |       | 23.93 | 17.99 |      | 13.72 |       |      |      |      |     |   |      | 0.42 | 44    |     |     |      |     |      | 100   | 86           |
| S12    | 13   | 3        | Cal       | 0.80  |       | 0.41  |       |      | 0.41  | 54.39 |      |      |      |     |   |      |      |       |     |     |      |     |      | 56    | 52           |
| S12    | 13   | 4        | Grt (Alm) | 38.77 |       | 20.48 | 27.8  | 9.86 | 1.96  | 1.14  |      |      |      |     |   |      |      |       |     |     |      |     |      | 100   | 101          |
| S12    | 13   | 5        | Cal       |       |       |       | 0.27  |      | 1.18  | 54.55 |      |      |      |     |   |      |      |       |     |     |      |     |      | 56    | 50           |
| S12    | 13   | 6        | Qz+       | 84.24 |       | 5.37  | 4.76  |      | 5.34  |       |      | 0.28 |      |     |   |      |      |       |     |     |      |     |      | 100   | 107          |
| S12    | 13   | 7        | Chr       |       |       | 7.71  | 19.96 |      | 10.04 |       |      |      |      |     |   |      |      | 62.3  |     |     |      |     |      | 100   | 93           |
| S12    | 13   | 8        | Cal       |       |       |       |       |      |       | 55.54 | 0.46 |      |      |     |   |      |      |       |     |     |      |     |      | 56    | 47           |
| S12    | 13   | 9        | Mix       | 34.34 | 13.98 | 17.68 | 25.34 | 0.67 | 2.54  | 5.45  |      |      |      |     |   |      |      |       |     |     |      |     |      | 100   | 94           |
| S12    | 13   | 10       | Grt (Alm) | 39.49 |       | 20.96 | 33.37 | 0.52 | 4.18  | 1.47  |      |      |      |     |   |      |      |       |     |     |      |     |      | 100   | 104          |
| S12    | 14   | 1        | Cal       |       |       |       |       |      | 0.70  | 55.30 |      |      |      |     |   |      |      |       |     |     |      |     |      | 56    | 50           |
| S12    | 14   | 2        | Cal       | 0.48  |       |       |       |      |       | 55.52 |      |      |      |     |   |      |      |       |     |     |      |     |      | 56    | 53           |
| S12    | 14   | 3        | Qz        | 100   |       |       |       |      |       |       |      |      |      |     |   |      |      |       |     |     |      |     |      | 100   | 107          |
| S12    | 14   | 4        | Qz        | 100   |       |       |       |      |       |       |      |      |      |     |   |      |      |       |     |     |      |     |      | 100   | 106          |
| S12    | 14   | 5        | Grt (Alm) | 39.49 |       | 21.07 | 27.84 | 2.94 | 1.65  | 7.01  |      |      |      |     |   |      |      |       |     |     |      |     |      | 100   | 99           |

Table A4.1: EDS analyses of sample S12.

| Sample | Site | Position | Mineral   | SiO2  | TiO2 | Al2O3 | FeO   | MnO  | MgO   | CaO   | Na2O | K2O | P2O5 | SO3 | F | Cl | V2O5 | Cr2O3 | ZnO  | SrO | ZrO2 | BaO | WO3 | Total | Actual Total |
|--------|------|----------|-----------|-------|------|-------|-------|------|-------|-------|------|-----|------|-----|---|----|------|-------|------|-----|------|-----|-----|-------|--------------|
| S12    | 14   | 6        | Qz        | 100   |      |       |       |      |       |       |      |     |      |     |   |    |      |       |      |     |      |     |     | 100   | 106          |
| S12    | 15   | 1        | Cal       | 0.57  |      |       |       |      | 0.55  | 54.88 |      |     |      |     |   |    |      |       |      |     |      |     |     | 56    | 57           |
| S12    | 15   | 2        | Cal       |       |      |       |       |      | 0.47  | 55.53 |      |     |      |     |   |    |      |       |      |     |      |     |     | 56    | 49           |
| S12    | 15   | 3        | Chr       |       |      | 7.1   | 22.82 |      | 8.74  |       |      |     |      |     |   |    |      | 61.3  |      |     |      |     |     | 100   | 91           |
| S12    | 15   | 4        | Spl       | 4.48  |      | 31.24 | 21.38 |      | 13.87 |       |      |     |      |     |   |    |      | 28.6  | 0.43 |     |      |     |     | 100   | 97           |
| S12    | 15   | 5        | Grt (Alm) | 39.04 |      | 21.1  | 33.76 | 1.13 | 3.7   | 1.28  |      |     |      |     |   |    |      |       |      |     |      |     |     | 100   | 105          |
| S12    | 15   | 6        | Chr       |       |      | 22.58 | 26.82 |      | 10.17 |       |      |     |      |     |   |    | 0.53 | 39.9  |      |     |      |     |     | 100   | 98           |
| S12    | 15   | 7        | Chr       |       |      | 12.44 | 19.91 |      | 11.17 |       |      |     |      |     |   |    |      | 56.5  |      |     |      |     |     | 100   | 80           |
| S12    | 15   | 8        | Chr       |       |      | 14.6  | 19.73 |      | 10.78 |       |      |     |      |     |   |    | 0.41 | 54.5  |      |     |      |     |     | 100   | 84           |
| S12    | 15   | 9        | Grt (Alm) | 40.03 |      | 20.9  | 30.07 | 1.38 | 6.05  | 1.57  |      |     |      |     |   |    |      |       |      |     |      |     |     | 100   | 103          |
| S12    | 15   | 10       | Cal       |       |      |       |       |      | 0.64  | 55.36 |      |     |      |     |   |    |      |       |      |     |      |     |     | 56    | 51           |
| S12    | 15   | 11       | Qz        | 100   |      |       |       |      |       |       |      |     |      |     |   |    |      |       |      |     |      |     |     | 100   | 107          |
| S12    | 15   | 12       | Qz        | 100   |      |       |       |      |       |       |      |     |      |     |   |    |      |       |      |     |      |     |     | 100   | 107          |
| S12    | 15   | 13       | Spl       |       |      | 33.03 | 16.39 |      | 15.55 |       |      |     |      |     |   |    |      | 35    |      |     |      |     |     | 100   | 84           |
| S12    | 15   | 14       | Chr       |       | 1.14 | 17.2  | 35.71 |      | 5.44  |       |      |     |      |     |   |    | 0.43 | 40.1  |      |     |      |     |     | 100   | 105          |
| S12    | 16   | 1        | Qz        | 99.75 |      |       |       |      |       | 0.25  |      |     |      |     |   |    |      |       |      |     |      |     |     | 100   | 108          |
| S12    | 16   | 2        | Cal       |       |      |       |       |      | 1.34  | 54.66 |      |     |      |     |   |    |      |       |      |     |      |     |     | 56    | 52           |
| S12    | 16   | 3        | Cal       |       |      |       |       |      | 0.84  | 55.16 |      |     |      |     |   |    |      |       |      |     |      |     |     | 56    | 52           |
| S12    | 17   | 1        | Chr       |       |      | 10.66 | 25.1  |      | 7.95  |       |      |     |      |     |   |    |      | 56.3  |      |     |      |     |     | 100   | 81           |
| S12    | 17   | 2        | Chr       |       |      | 26.6  | 20.65 |      | 12.75 |       |      |     |      |     |   |    |      | 40    |      |     |      |     |     | 100   | 86           |
| S12    | 17   | 3        | Chr       |       |      | 6.77  | 24.51 |      | 7.77  |       |      |     |      |     |   |    |      | 61    |      |     |      |     |     | 100   | 88           |
| S12    | 17   | 4        | Grt (Alm) | 39.52 |      | 21.09 | 33.36 | 0.98 | 4     | 1.05  |      |     |      |     |   |    |      |       |      |     |      |     |     | 100   | 95           |
| S12    | 17   | 5        | Chr       |       |      | 12.82 | 17    |      | 12.96 |       |      |     |      |     |   |    |      | 57.2  |      |     |      |     |     | 100   | 92           |
| S12    | 17   | 6        | Spl       |       |      | 33.22 | 15.53 |      | 16.43 |       |      |     |      |     |   |    |      | 34.8  |      |     |      |     |     | 100   | 99           |
| S12    | 17   | 7        | Grt (Alm) | 39.88 |      | 21.02 | 26.98 | 2.04 | 3.26  | 6.82  |      |     |      |     |   |    |      |       |      |     |      |     |     | 100   | 108          |
| S12    | 17   | 8        | Chr       |       |      | 13.18 | 27.26 |      | 8.21  |       |      |     |      |     |   |    |      | 51.4  |      |     |      |     |     | 100   | 87           |
| S12    | 17   | 9        | Cal       |       |      |       |       | 0.67 |       | 55.33 |      |     |      |     |   |    |      |       |      |     |      |     |     | 56    | 44           |
| S12    | 17   | 10       | Cal       |       |      |       |       | 0.49 | 0.96  | 54.54 |      |     |      |     |   |    |      |       |      |     |      |     |     | 56    | 45           |
| S12    | 17   | 11       | Qz        | 99.63 |      | 0.37  |       |      |       |       |      |     |      |     |   |    |      |       |      |     |      |     |     | 100   | 104          |
| S12    | 17   | 12       | Cal       |       |      |       |       |      | 0.46  | 55.54 |      |     |      |     |   |    |      |       |      |     |      |     |     | 56    | 48           |
| S12    | 17   | 13       | Cal       |       |      |       |       |      | 0.50  | 55.50 |      |     |      |     |   |    |      |       |      |     |      |     |     | 56    | 54           |
| S12    | 17   | 14       | Spl       |       |      | 32.24 | 17.73 |      | 14.42 |       |      |     |      |     |   |    |      | 35.6  |      |     |      |     |     | 100   | 97           |

Table A4.1: EDS analyses of sample S12.

| Sample | Site | Position | Mineral   | SiO2  | TiO2  | Al2O3 | FeO   | MnO  | MgO   | CaO   | Na2O | K2O  | P2O5 | SO3  | F | Cl   | V2O5 | Cr2O3 | ZnO | SrO | ZrO2 | BaO | WO3 | Total | Actual Total |
|--------|------|----------|-----------|-------|-------|-------|-------|------|-------|-------|------|------|------|------|---|------|------|-------|-----|-----|------|-----|-----|-------|--------------|
| S12    | 17   | 15       | Grt (Alm) | 39.84 |       | 20.95 | 29.96 | 1.12 | 2.77  | 5.35  |      |      |      |      |   |      |      |       |     |     |      |     |     | 100   | 84           |
| S12    | 17   | 16       | Chr       |       |       | 18.81 | 21.4  |      | 11.53 |       |      |      |      |      |   |      | 0.39 | 47.9  |     |     |      |     |     | 100   | 96           |
| S12    | 17   | 17       | Spl       |       |       | 35.7  | 17.71 |      | 15.33 |       |      |      |      |      |   |      | 0.34 | 30.9  |     |     |      |     |     | 100   | 93           |
| S12    | 17   | 18       | Chr       |       | 0.62  | 20.35 | 19.86 |      | 13.15 |       |      |      |      |      |   |      | 0.39 | 45.6  |     |     |      |     |     | 100   | 100          |
| S12    | 17   | 19       | Grt       | 40.06 |       | 21.31 | 20.16 | 0.85 | 0.58  | 17.04 |      |      |      |      |   |      |      |       |     |     |      |     |     | 100   | 106          |
| S12    | 18   | 1        | Chr       |       |       | 13.68 | 18.22 |      | 11.51 |       |      |      |      |      |   |      |      | 56.6  |     |     |      |     |     | 100   | 96           |
| S12    | 18   | 2        | Chr       |       |       | 14.25 | 28.89 |      | 7.02  |       |      |      |      |      |   |      |      | 49.8  |     |     |      |     |     | 100   | 88           |
| S12    | 18   | 3        | Chr +     |       | 6.46  | 9.92  | 44.65 |      | 8.1   |       |      |      |      |      |   |      | 1.06 | 29.8  |     |     |      |     |     | 100   | 99           |
| S12    | 18   | 4        | Chr       |       |       | 27.72 | 16.92 |      | 14.27 |       |      |      |      |      |   |      |      | 41.1  |     |     |      |     |     | 100   | 104          |
| S12    | 18   | 5        | Grt (Alm) | 40.6  |       | 21.15 | 23.94 | 0.59 | 4.1   | 9.63  |      |      |      |      |   |      |      |       |     |     |      |     |     | 100   | 95           |
| S12    | 18   | 6        | Cal +     | 1.51  |       |       | 0.39  |      | 0.52  | 53.60 |      |      |      |      |   |      |      |       |     |     |      |     |     | 56    | 52           |
| S12    | 18   | 7        | Grt (Alm) | 39.74 |       | 20.7  | 30.92 | 1.77 | 3.52  | 3.35  |      |      |      |      |   |      |      |       |     |     |      |     |     | 100   | 106          |
| S12    | 18   | 8        | Grt (Alm) | 39.54 |       | 21.09 | 27.76 | 1.5  | 2.63  | 7.48  |      |      |      |      |   |      |      |       |     |     |      |     |     | 100   | 103          |
| S12    | 18   | 9        | Grt (Alm) | 39.59 |       | 21.01 | 27.29 | 1.79 | 1.73  | 8.59  |      |      |      |      |   |      |      |       |     |     |      |     |     | 100   | 105          |
| S12    | 18   | 10       | Qz        | 100   |       |       |       |      |       |       |      |      |      |      |   |      |      |       |     |     |      |     |     | 100   | 107          |
| S12    | 18   | 11       | Cal       | 0.52  |       |       |       |      | 0.37  | 55.11 |      |      |      |      |   |      |      |       |     |     |      |     |     | 56    | 53           |
| S12    | 18   | 12       | Spl       |       |       | 48.58 | 14.53 |      | 18.19 |       |      |      |      |      |   |      |      | 18.7  |     |     |      |     |     | 100   | 103          |
| S12    | 18   | 13       | Ep        | 39.61 | 0.349 | 22.59 | 12.02 |      | 1.659 | 20.78 |      |      |      |      |   |      |      |       |     |     |      |     |     | 97    | 90           |
| S12    | 19   | 1        | Cal+      | 7.18  |       | 2.02  | 3.31  |      | 2.22  | 84.83 |      | 0.44 |      |      |   |      |      |       |     |     |      |     |     | 100   | 54           |
| S12    | 19   | 2        | Qz        | 100   |       |       |       |      |       |       |      |      |      |      |   |      |      |       |     |     |      |     |     | 100   | 111          |
| S12    | 19   | 3        | Grt (Alm) | 40.16 |       | 21.18 | 26.67 | 1.41 | 4.53  | 6.05  |      |      |      |      |   |      |      |       |     |     |      |     |     | 100   | 107          |
| S12    | 19   | 4        | Grt (Alm) | 39.88 |       | 20.86 | 30.43 | 0.29 | 2.95  | 5.59  |      |      |      |      |   |      |      |       |     |     |      |     |     | 100   | 103          |
| S12    | 19   | 5        | Cal       |       |       |       |       |      | 0.48  | 55.52 |      |      |      |      |   |      |      |       |     |     |      |     |     | 56    | 52           |
| S12    | 19   | 6        | Ilm       |       | 52.84 |       | 44.09 | 1.89 |       | 1.19  |      |      |      |      |   |      |      |       |     |     |      |     |     | 100   | 94           |
| S12    | 20   | 1        | Chr       |       |       | 7.21  | 23.45 |      | 8.9   |       |      |      |      |      |   |      |      | 60.4  |     |     |      |     |     | 100   | 96           |
| S12    | 20   | 2        | Chr       |       |       | 15.23 | 19.87 |      | 10.51 |       |      |      |      |      |   |      |      | 54.4  |     |     |      |     |     | 100   | 99           |
| S12    | 20   | 3        | Cal       | 1.40  |       | 0.57  |       |      | 0.35  | 53.56 |      | 0.12 |      |      |   |      |      |       |     |     |      |     |     | 56    | 52           |
| S12    | 20   | 4        | Mix       | 15.63 |       | 3.13  | 18.66 |      | 1.65  | 36.83 |      | 0.87 |      | 22.9 |   | 0.37 |      |       |     |     |      |     |     | 100   | 88           |
| S12    | 20   | 5        | Qz        | 100   |       |       |       |      |       |       |      |      |      |      |   |      |      |       |     |     |      |     |     | 100   | 109          |
| S12    | 20   | 6        | Anh       | 0.39  |       |       |       |      |       | 38.52 |      |      |      | 61.1 |   |      |      |       |     |     |      |     |     | 100   | 93           |
| S12    | 20   | 7        | Qz        | 99.28 |       | 0.41  | 0.32  |      |       |       |      |      |      |      |   |      |      |       |     |     |      |     |     | 100   | 111          |
| S12    | 21   | 1        | HI        | 1.08  |       |       |       |      |       |       | 46.9 | 0.24 |      |      |   | 51.8 |      |       |     |     |      |     |     | 100   | 130          |



Table A4.1: EDS analyses of sample S12.

| Sample | Site | Position | Mineral   | SiO2  | TiO2  | Al2O3 | FeO   | MnO  | MgO   | CaO   | Na2O | K2O  | P2O5 | SO3  | F | Cl   | V2O5 | Cr2O3 | ZnO | SrO | ZrO2 | BaO | WO3 | Total | Actual Total |
|--------|------|----------|-----------|-------|-------|-------|-------|------|-------|-------|------|------|------|------|---|------|------|-------|-----|-----|------|-----|-----|-------|--------------|
| S12    | 21   | 2        | HI +      | 5.74  |       |       |       |      |       |       | 46.2 | 0.46 |      |      |   | 47.7 |      |       |     |     |      |     |     | 100   | 123          |
| S12    | 21   | 3        | TiO2 +    | 6.92  | 91.55 | 1.02  |       |      |       |       |      | 0.5  |      |      |   |      |      |       |     |     |      |     |     | 100   | 102          |
| S12    | 21   | 4        | Qz        | 99.79 |       |       | 0.21  |      |       |       |      |      |      |      |   |      |      |       |     |     |      |     |     | 100   | 110          |
| S12    | 22   | 1        | Cal+      | 9.55  |       | 3.01  | 0.53  |      | 1.23  | 85    |      | 0.67 |      |      |   |      |      |       |     |     |      |     |     | 100   | 61           |
| S12    | 22   | 2        | Ep        | 40.05 |       | 23.38 | 10.92 |      |       | 22.65 |      |      |      |      |   |      |      |       |     |     |      |     |     | 97    | 104          |
| S12    | 22   | 3        | Qz        | 100   |       |       |       |      |       |       |      |      |      |      |   |      |      |       |     |     |      |     |     | 100   | 114          |
| S12    | 22   | 4        | Cal       |       |       |       |       |      | 0.55  | 55.45 |      |      |      |      |   |      |      |       |     |     |      |     |     | 56    | 54           |
| S12    | 22   | 5        | Qz        | 99.52 |       |       |       |      | 0.28  | 0.19  |      |      |      |      |   |      |      |       |     |     |      |     |     | 100   | 113          |
| S12    | 22   | 6        | Cal       |       |       |       |       |      |       | 55.14 | 0.86 |      |      |      |   |      |      |       |     |     |      |     |     | 56    | 55           |
| S12    | 22   | 7        | Qz        | 98.82 |       | 0.77  | 0.21  |      |       |       |      | 0.2  |      |      |   |      |      |       |     |     |      |     |     | 100   | 110          |
| S12    | 22   | 8        | Py        | 0.72  |       |       | 28.56 |      |       |       |      |      |      | 70.7 |   |      |      |       |     |     |      |     |     | 100   | 204          |
| S12    | 23   | 1        | Ep        | 39.98 |       | 23.23 | 11.14 |      |       | 22.65 |      |      |      |      |   |      |      |       |     |     |      |     |     | 97    | 101          |
| S12    | 23   | 2        | Qz        | 98.14 |       |       | 0.32  |      | 0.9   | 0.64  |      |      |      |      |   |      |      |       |     |     |      |     |     | 100   | 110          |
| S12    | 24   | 1        | Chr       |       |       | 15.48 | 17.74 |      | 12.19 |       |      |      |      |      |   |      |      | 54.6  |     |     |      |     |     | 100   | 90           |
| S12    | 24   | 2        | Chr       |       | 0.3   | 10.74 | 30.75 |      | 7.27  |       |      |      |      |      |   |      | 0.44 | 50.5  |     |     |      |     |     | 100   | 94           |
| S12    | 24   | 3        | Chr       |       |       | 21.31 | 19.52 |      | 11.85 |       |      |      |      |      |   |      |      | 47.3  |     |     |      |     |     | 100   | 95           |
| S12    | 24   | 4        | Chr       |       |       | 11.1  | 24.15 |      | 9.19  |       |      |      |      |      |   |      |      | 55.6  |     |     |      |     |     | 100   | 97           |
| S12    | 24   | 5        | Chr       |       |       | 8.07  | 18.47 |      | 12.6  |       |      |      |      |      |   |      |      | 60.9  |     |     |      |     |     | 100   | 103          |
| S12    | 24   | 6        | Grt (Alm) | 39.76 |       | 20.83 | 30.02 | 0.81 | 3.35  | 5.23  |      |      |      |      |   |      |      |       |     |     |      |     |     | 100   | 109          |
| S12    | 24   | 7        | Chr       |       |       | 16.44 | 18.58 |      | 11.85 |       |      |      |      |      |   |      | 0.41 | 52.7  |     |     |      |     |     | 100   | 94           |
| S12    | 24   | 8        | Grt (Alm) | 39.24 |       | 20.8  | 30.37 | 5.12 | 2.46  | 2.01  |      |      |      |      |   |      |      |       |     |     |      |     |     | 100   | 98           |
| S12    | 24   | 9        | Cal       |       |       |       |       |      |       | 56.00 |      |      |      |      |   |      |      |       |     |     |      |     |     | 56    | 53           |
| S12    | 24   | 10       | Qz        | 100   |       |       |       |      |       |       |      |      |      |      |   |      |      |       |     |     |      |     |     | 100   | 108          |
| S12    | 24   | 11       | Chr       |       |       | 20.55 | 17.59 |      | 12.78 |       |      |      |      |      |   |      | 0.32 | 48.8  |     |     |      |     |     | 100   | 99           |
| S12    | 24   | 12       | Spl       |       |       | 46.6  | 15.76 |      | 17.34 |       |      |      |      |      |   |      |      | 20.3  |     |     |      |     |     | 100   | 99           |
| S12    | 24   | 13       | Cal+      | 13.59 |       |       | 0.78  | 0.59 | 1.15  | 83.89 |      |      |      |      |   |      |      |       |     |     |      |     |     | 100   | 59           |
| S12    | 24   | 14       | Cal       |       |       |       |       |      | 0.39  | 55.61 |      |      |      |      |   |      |      |       |     |     |      |     |     | 56    | 50           |
| S12    | 24   | 15       | Qz        | 100   |       |       |       |      |       |       |      |      |      |      |   |      |      |       |     |     |      |     |     | 100   | 104          |
| S12    | 24   | 16       | Cal       |       |       |       |       |      |       | 55.10 | 0.90 |      |      |      |   |      |      |       |     |     |      |     |     | 56    | 50           |
| S12    | 24   | 17       | Qz +      | 93.3  |       | 1.58  | 0.46  |      | 0.46  |       |      | 0.46 |      |      |   |      |      |       |     |     | 3.73 |     |     | 100   | 99           |
| S12    | 24   | 18       | Grt (Alm) | 40.87 |       | 21.75 | 25.82 | 0.53 | 9.51  | 1.53  |      |      |      |      |   |      |      |       |     |     |      |     |     | 100   | 103          |
| S12    | 24   | 19       | Grt (Alm) | 39.49 |       | 20.73 | 27.9  | 2.64 | 1.8   | 7.44  |      |      |      |      |   |      |      |       |     |     |      |     |     | 100   | 104          |

Table A4.1: EDS analyses of sample S12.

| Sample | Site | Position | Mineral   | SiO2  | TiO2  | Al2O3 | FeO   | MnO  | MgO   | CaO   | Na2O | K2O  | P2O5 | SO3  | F | Cl | V2O5 | Cr2O3 | ZnO  | SrO | ZrO2 | BaO | WO3 | Total | Actual Total |
|--------|------|----------|-----------|-------|-------|-------|-------|------|-------|-------|------|------|------|------|---|----|------|-------|------|-----|------|-----|-----|-------|--------------|
| S12    | 25   | 1        | Grt (Alm) | 39.94 |       | 20.97 | 31.25 | 1.2  | 4.54  | 2.09  |      |      |      |      |   |    |      |       |      |     |      |     |     | 100   | 96           |
| S12    | 25   | 2        | Chr       |       |       | 15.78 | 23.51 |      | 10.14 |       |      |      |      |      |   |    |      | 50.6  |      |     |      |     |     | 100   | 93           |
| S12    | 25   | 3        | Spl       |       |       | 32.46 | 18.98 |      | 14.58 |       |      |      |      |      |   |    |      | 34    |      |     |      |     |     | 100   | 100          |
| S12    | 25   | 4        | Chr       |       |       | 11.62 | 19.3  |      | 11.62 |       |      |      |      |      |   |    |      | 57.5  |      |     |      |     |     | 100   | 98           |
| S12    | 25   | 5        | Grt (Alm) | 39.67 |       | 21.16 | 28.76 | 1.43 | 3.16  | 5.82  |      |      |      |      |   |    |      |       |      |     |      |     |     | 100   | 102          |
| S12    | 25   | 6        | Grt (Alm) | 39.66 |       | 20.89 | 31.59 | 1.88 | 4.26  | 1.72  |      |      |      |      |   |    |      |       |      |     |      |     |     | 100   | 100          |
| S12    | 25   | 7        | Qz        | 100   |       |       |       |      |       |       |      |      |      |      |   |    |      |       |      |     |      |     |     | 100   | 105          |
| S12    | 25   | 8        | Grt (Alm) | 39.64 |       | 21.2  | 30.66 | 1.18 | 3.41  | 3.89  |      |      |      |      |   |    |      |       |      |     |      |     |     | 100   | 98           |
| S12    | 25   | 9        | Grt (Alm) | 39.87 |       | 20.84 | 26.22 | 4.09 | 1.75  | 7.24  |      |      |      |      |   |    |      |       |      |     |      |     |     | 100   | 95           |
| S12    | 25   | 10       | Grt (Alm) | 39.68 |       | 21.03 | 30.62 | 1.63 | 3.1   | 3.93  |      |      |      |      |   |    |      |       |      |     |      |     |     | 100   | 93           |
| S12    | 25   | 11       | Cal       |       |       |       | 0.28  |      | 0.58  | 55.14 |      |      |      |      |   |    |      |       |      |     |      |     |     | 56    | 46           |
| S12    | 25   | 12       | Grt (Alm) | 39.77 |       | 20.48 | 27.27 | 2.59 | 0.98  | 8.9   |      |      |      |      |   |    |      |       |      |     |      |     |     | 100   | 95           |
| S12    | 25   | 13       | Spl       |       |       | 43.79 | 13.52 |      | 18.34 |       |      |      |      |      |   |    |      | 24.4  |      |     |      |     |     | 100   | 104          |
| S12    | 25   | 14       | Spl       |       | 0.45  | 33.87 | 22.74 |      | 12.31 |       |      |      |      |      |   |    |      | 30.2  | 0.44 |     |      |     |     | 100   | 105          |
| S12    | 25   | 15       | Grt (Alm) | 39.64 |       | 20.91 | 31.26 | 1.49 | 5.23  | 1.48  |      |      |      |      |   |    |      |       |      |     |      |     |     | 100   | 106          |
| S12    | 25   | 16       | Spl       |       |       | 31.28 | 15.22 |      | 15.37 |       |      |      |      |      |   |    |      | 37.7  | 0.43 |     |      |     |     | 100   | 105          |
| S12    | 25   | 17       | Cal       |       |       |       |       |      |       | 55.29 | 0.71 |      |      |      |   |    |      |       |      |     |      |     |     | 56    | 52           |
| S12    | 25   | 18       | Cal       |       |       |       |       |      | 0.44  | 55.56 |      |      |      |      |   |    |      |       |      |     |      |     |     | 56    | 52           |
| S12    | 25   | 19       | Qz        | 100   |       |       |       |      |       |       |      |      |      |      |   |    |      |       |      |     |      |     |     | 100   | 106          |
| S12    | 25   | 20       | Spl       |       |       | 34.18 | 19.72 |      | 13.43 |       |      |      |      |      |   |    |      | 32.7  |      |     |      |     |     | 100   | 93           |
| S12    | 25   | 21       | Cal       | 0.59  |       |       | 0.26  | 0.89 | 0.41  | 53.85 |      |      |      |      |   |    |      |       |      |     |      |     |     | 56    | 56           |
| S12    | 25   | 22       | Kfs       | 66.15 |       | 17.68 |       |      |       |       | 0.79 | 15.4 |      |      |   |    |      |       |      |     |      |     |     | 100   | 93           |
| S12    | 25   | 23       | Cal       |       |       |       |       |      | 0.46  | 55.00 |      |      |      | 0.54 |   |    |      |       |      |     |      |     |     | 56    | 46           |
| S12    | 25   | 24       | Grt (Alm) | 39.66 |       | 20.83 | 29.58 | 0.52 | 1.98  | 7.44  |      |      |      |      |   |    |      |       |      |     |      |     |     | 100   | 105          |
| S12    | 26   | 1        | Cal       |       |       |       |       |      | 0.41  | 55.59 |      |      |      |      |   |    |      |       |      |     |      |     |     | 56    | 51           |
| S12    | 26   | 2        | Qz        | 100   |       |       |       |      |       |       |      |      |      |      |   |    |      |       |      |     |      |     |     | 100   | 106          |
| S12    | 27   | 1        | Qz        | 100   |       |       |       |      |       |       |      |      |      |      |   |    |      |       |      |     |      |     |     | 100   | 95           |
| S12    | 27   | 2        | Grt (Alm) | 39.36 |       | 21.08 | 33.27 | 1.12 | 4.27  | 0.89  |      |      |      |      |   |    |      |       |      |     |      |     |     | 100   | 90           |
| S12    | 27   | 3        | Chr       |       |       | 22.04 | 16.99 |      | 14.36 |       |      |      |      |      |   |    |      | 46.6  |      |     |      |     |     | 100   | 97           |
| S12    | 27   | 4        | Ttn +     | 19.49 | 61.52 | 0.33  | 2.05  | 0.51 |       | 16.09 |      |      |      |      |   |    |      |       |      |     |      |     |     | 100   | 97           |
| S12    | 27   | 5        | Chr       |       |       | 22.36 | 19.99 |      | 12.31 |       |      |      |      |      |   |    |      | 45.3  |      |     |      |     |     | 100   | 97           |
| S12    | 27   | 6        | Chr       |       | 0.44  | 13.74 | 30.86 |      | 6.97  |       |      |      |      |      |   |    |      | 48    |      |     |      |     |     | 100   | 87           |

Table A4.1: EDS analyses of sample S12.

| Sample | Site | Position | Mineral   | SiO2  | TiO2  | Al2O3 | FeO   | MnO  | MgO   | CaO   | Na2O | K2O  | P2O5 | SO3 | F | Cl | V2O5 | Cr2O3 | ZnO  | SrO | ZrO2 | BaO | WO3 | Total | Actual Total |
|--------|------|----------|-----------|-------|-------|-------|-------|------|-------|-------|------|------|------|-----|---|----|------|-------|------|-----|------|-----|-----|-------|--------------|
| S12    | 27   | 7        | Chr       |       |       | 11.89 | 21.44 |      | 10.37 |       |      |      |      |     |   |    |      | 56.3  |      |     |      |     |     | 100   | 86           |
| S12    | 27   | 8        | Cal       | 0.56  |       |       |       |      |       | 54.53 | 0.91 |      |      |     |   |    |      |       |      |     |      |     |     | 56    | 45           |
| S12    | 27   | 9        | Chr       |       |       | 12.6  | 22.16 |      | 9.83  |       |      |      |      |     |   |    | 0.4  | 55    |      |     |      |     |     | 100   | 93           |
| S12    | 27   | 10       | Chr       |       |       | 18.08 | 19.1  |      | 11.59 |       |      |      |      |     |   |    |      | 51.2  |      |     |      |     |     | 100   | 92           |
| S12    | 27   | 11       | Chr       |       |       | 14.23 | 18.75 |      | 11.29 |       |      |      |      |     |   |    | 0.45 | 55.3  |      |     |      |     |     | 100   | 96           |
| S12    | 27   | 12       | Grt (Alm) | 39.33 |       | 20.76 | 34.29 | 0.58 | 2.97  | 2.07  |      |      |      |     |   |    |      |       |      |     |      |     |     | 100   | 84           |
| S12    | 27   | 13       | Cal       |       |       |       |       |      | 0.40  | 55.60 |      |      |      |     |   |    |      |       |      |     |      |     |     | 56    | 53           |
| S12    | 27   | 14       | Grt (Alm) | 40.68 |       | 21.52 | 25.64 | 0.77 | 8.79  | 2.6   |      |      |      |     |   |    |      |       |      |     |      |     |     | 100   | 103          |
| S12    | 28   | 1        | Cal       |       |       |       |       |      |       | 56.00 |      |      |      |     |   |    |      |       |      |     |      |     |     | 56    | 48           |
| S12    | 28   | 2        | Qz        | 100   |       |       |       |      |       |       |      |      |      |     |   |    |      |       |      |     |      |     |     | 100   | 86           |
| S12    | 28   | 3        | Ttn       | 28.46 | 46.53 | 1.03  | 0.78  |      |       | 23.2  |      |      |      |     |   |    |      |       |      |     |      |     |     | 100   | 79           |
| S12    | 28   | 4        | Chr       |       |       | 24.49 | 19.93 |      | 12.55 |       |      |      |      |     |   |    | 0.37 | 42.7  |      |     |      |     |     | 100   | 86           |
| S12    | 28   | 5        | Chr       | 0.46  |       | 28.34 | 17.24 |      | 14.34 |       |      |      |      |     |   |    |      | 39.6  |      |     |      |     |     | 100   | 89           |
| S12    | 28   | 6        | Cal+      | 8.69  |       | 0.65  |       |      | 0.89  | 89.77 |      |      |      |     |   |    |      |       |      |     |      |     |     | 100   | 46           |
| S12    | 28   | 7        | Chr       |       |       | 19.16 | 17.83 |      | 12.37 |       |      |      |      |     |   |    | 0.37 | 50.3  |      |     |      |     |     | 100   | 106          |
| S12    | 28   | 8        | Chr       |       |       | 29.72 | 14.24 |      | 15.44 |       |      |      |      |     |   |    | 0.33 | 40.3  |      |     |      |     |     | 100   | 109          |
| S12    | 28   | 9        | Spl       |       |       | 46.3  | 14.45 |      | 17.96 |       |      |      |      |     |   |    |      | 21.3  |      |     |      |     |     | 100   | 92           |
| S12    | 28   | 10       | Grt (Alm) | 39.56 |       | 20.91 | 34.65 |      | 2.84  | 2.03  |      |      |      |     |   |    |      |       |      |     |      |     |     | 100   | 78           |
| S12    | 28   | 11       | Chr       |       | 1.35  | 19.4  | 37.42 |      | 5.84  |       |      |      |      |     |   |    | 0.43 | 35.6  |      |     |      |     |     | 100   | 104          |
| S12    | 29   | 1        | Grt (Alm) | 39.5  |       | 20.64 | 30    | 2.11 | 1.56  | 6.19  |      |      |      |     |   |    |      |       |      |     |      |     |     | 100   | 95           |
| S12    | 29   | 2        | Cal       | 0.41  |       |       |       |      | 0.85  | 54.75 |      |      |      |     |   |    |      |       |      |     |      |     |     | 56    | 50           |
| S12    | 29   | 3        | Qz        | 100   |       |       |       |      |       |       |      |      |      |     |   |    |      |       |      |     |      |     |     | 100   | 102          |
| S12    | 29   | 4        | Spl       |       |       | 26.57 | 20.61 |      | 12.56 |       |      |      |      |     |   |    |      | 40.3  |      |     |      |     |     | 100   | 94           |
| S12    | 29   | 5        | Spl       |       | 0.4   | 26.73 | 21.27 |      | 13.02 |       |      |      |      |     |   |    |      | 38.6  |      |     |      |     |     | 100   | 95           |
| S12    | 29   | 6        | TiO2      | 0.5   | 99.04 |       | 0.45  |      |       |       |      |      |      |     |   |    |      |       |      |     |      |     |     | 100   | 93           |
| S12    | 29   | 7        | Qz        | 99.69 | 0.31  |       |       |      |       |       |      |      |      |     |   |    |      |       |      |     |      |     |     | 100   | 104          |
| S12    | 30   | 1        | Cal       |       |       |       |       |      | 0.43  | 55.19 |      |      |      |     |   |    |      |       | 0.39 |     |      |     |     | 56    | 54           |
| S12    | 30   | 2        | Zrn       | 27.16 |       |       |       |      |       | 8.63  |      |      |      |     |   |    |      |       | 0.5  |     | 63.7 |     |     | 100   | 90           |
| S12    | 30   | 3        | Grt (Alm) | 40.1  |       | 20.94 | 28.5  | 1.68 | 3.25  | 5.3   |      |      |      |     |   |    |      |       | 0.23 |     |      |     |     | 100   | 90           |
| S12    | 30   | 4        | Grt (Alm) | 39.93 |       | 21.11 | 27.48 | 5.96 | 4.18  | 1.34  |      |      |      |     |   |    |      |       |      |     |      |     |     | 100   | 89           |
| S12    | 30   | 5        | Cal +     | 2.71  |       | 1.12  | 0.66  |      | 1.06  | 94.21 |      | 0.25 |      |     |   |    |      |       |      |     |      |     |     | 100   | 47           |
| S12    | 30   | 6        | Spl       |       |       | 34.49 | 16.15 |      | 16.04 |       |      |      |      |     |   |    |      | 33.1  | 0.26 |     |      |     |     | 100   | 91           |

Table A4.1: EDS analyses of sample S12.

| Sample | Site                                          | Position | Mineral   | SiO2  | TiO2 | Al2O3 | FeO   | MnO  | MgO   | CaO   | Na2O | K2O  | P2O5 | SO3  | F | Cl | V2O5 | Cr2O3 | ZnO  | SrO | ZrO2 | BaO | WO3 | Total | Actual Total |
|--------|-----------------------------------------------|----------|-----------|-------|------|-------|-------|------|-------|-------|------|------|------|------|---|----|------|-------|------|-----|------|-----|-----|-------|--------------|
| S12    | 30                                            | 7        | Grt (Alm) | 39.21 |      | 20.78 | 29.85 | 6.06 | 3.04  | 0.75  |      |      |      |      |   |    |      |       | 0.32 |     |      |     |     | 100   | 98           |
| S12    | 30                                            | 8        | Spl       |       |      | 29.49 | 17.62 |      | 14.96 |       |      |      |      |      |   |    |      | 37.3  | 0.63 |     |      |     |     | 100   | 100          |
| S12    | 30                                            | 9        | Chr       |       |      | 5.82  | 24.48 |      | 7.96  |       |      |      |      |      |   |    | 0.39 | 60.6  | 0.7  |     |      |     |     | 100   | 92           |
| S12    | 30                                            | 10       | Grt (Alm) | 38.93 |      | 20.52 | 32.21 | 0.67 | 0.62  | 6.76  |      |      |      |      |   |    |      |       | 0.28 |     |      |     |     | 100   | 96           |
| S12    | 30                                            | 11       | Chr       |       |      | 16.48 | 21.13 |      | 10.32 |       |      |      |      |      |   |    |      | 51.5  | 0.58 |     |      |     |     | 100   | 88           |
| S12    | 30                                            | 12       | Chr       | 0.58  |      | 19.13 | 18.8  |      | 11.69 |       |      |      |      |      |   |    |      | 49.2  | 0.62 |     |      |     |     | 100   | 81           |
| S12    | 30                                            | 13       | Chr       |       | 1.41 | 24.67 | 27.69 |      | 11.85 |       |      |      |      |      |   |    |      | 34    | 0.41 |     |      |     |     | 100   | 84           |
| S12    | 30                                            | 14       | Grt (Alm) | 39.8  |      | 21.41 | 26.82 | 0.87 | 5.33  | 5.29  |      |      |      |      |   |    |      |       | 0.49 |     |      |     |     | 100   | 101          |
| S12    | 30                                            | 15       | Grt (Alm) | 39.73 |      | 21.04 | 30.22 | 0.27 | 4.51  | 3.86  |      |      |      |      |   |    |      |       | 0.38 |     |      |     |     | 100   | 102          |
| S12    | 31                                            | 1        | 704       | 98.68 |      | 0.6   | 0.22  |      |       |       | 0.37 | 0.13 |      |      |   |    |      |       |      |     |      |     |     | 100   | 104          |
| S12    | 31                                            | 2        | Py+       | 13.59 |      | 0.95  | 25.15 |      | 0.33  | 0.14  | 0.65 | 0.3  |      | 58.9 |   |    |      |       |      |     |      |     |     | 100   | 172          |
| S12    | 32                                            | 1        | Qz        | 100   |      |       |       |      |       |       |      |      |      |      |   |    |      |       |      |     |      |     |     | 100   | 106          |
| S12    | 32                                            | 2        | Cal       |       |      |       | 0.50  |      | 0.67  | 54.83 |      |      |      |      |   |    |      |       |      |     |      |     |     | 56    | 49           |
| S12    | 32                                            | 3        | Chr       |       | 0.87 | 22.27 | 27.74 |      | 9.75  |       |      |      |      |      |   |    | 0.55 | 38.4  | 0.39 |     |      |     |     | 100   | 95           |
| S12    | 32                                            | 4        | Cal       |       |      |       |       |      |       | 56.00 |      |      |      |      |   |    |      |       |      |     |      |     |     | 56    | 49           |
| S12    | 32                                            | 5        | Qz        | 100   |      |       |       |      |       |       |      |      |      |      |   |    |      |       |      |     |      |     |     | 100   | 104          |
|        |                                               |          |           |       |      |       |       |      |       |       |      |      |      |      |   |    |      |       |      |     |      |     |     |       |              |
|        | Note                                          |          |           |       |      |       |       |      |       |       |      |      |      |      |   |    |      |       |      |     |      |     |     |       |              |
|        | + = indicates that other minerals are present |          |           |       |      |       |       |      |       |       |      |      |      |      |   |    |      |       |      |     |      |     |     |       |              |
|        |                                               |          |           |       |      |       |       |      |       |       |      |      |      |      |   |    |      |       |      |     |      |     |     |       |              |
|        |                                               |          |           |       |      |       |       |      |       |       |      |      |      |      |   |    |      |       |      |     |      |     |     |       |              |



## A5: SEM-BSE images and EDS mineral analyses for sample S17

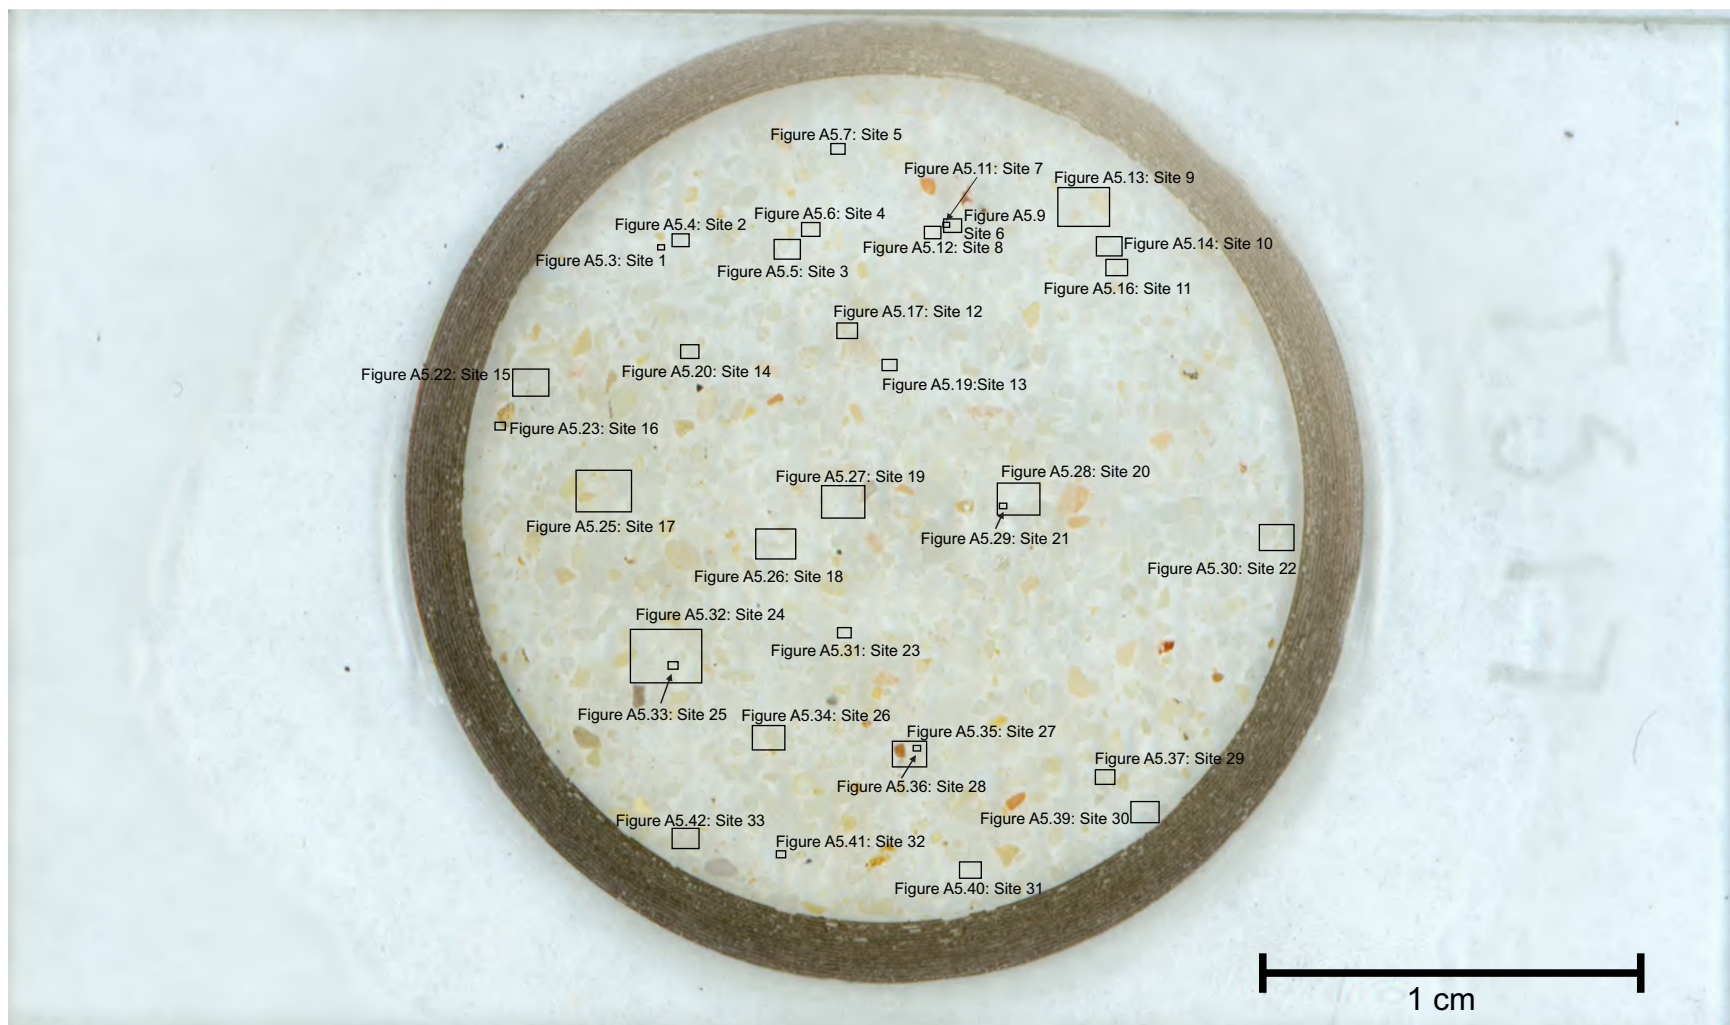

Figure A5:1: Slide S17, taken from a sandstone bed which is predominately limestone and is a shallow channel-like structure.

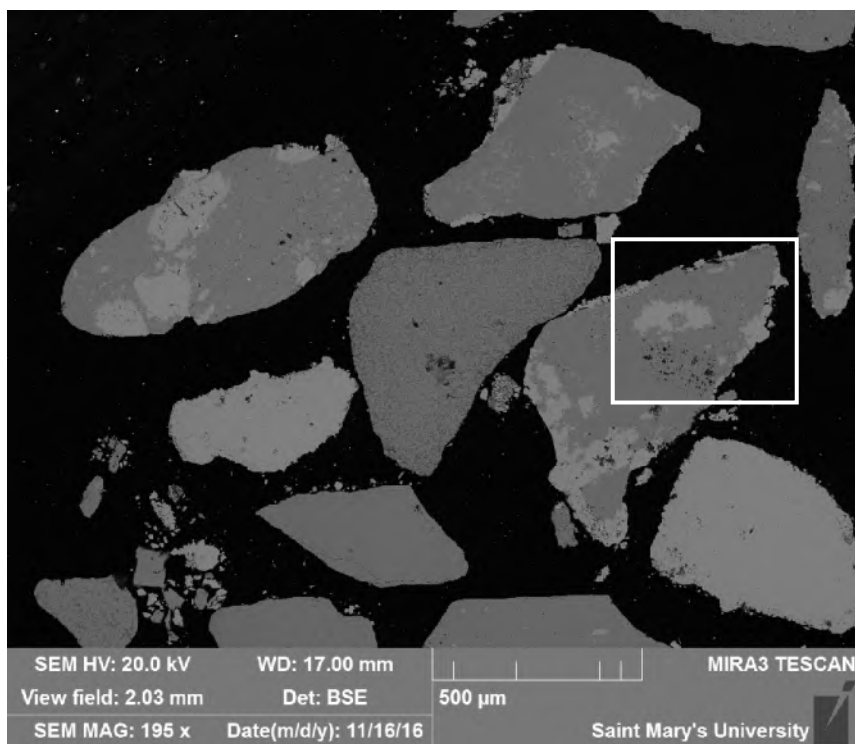

Figure A5.2: Sample S17 (SEM).

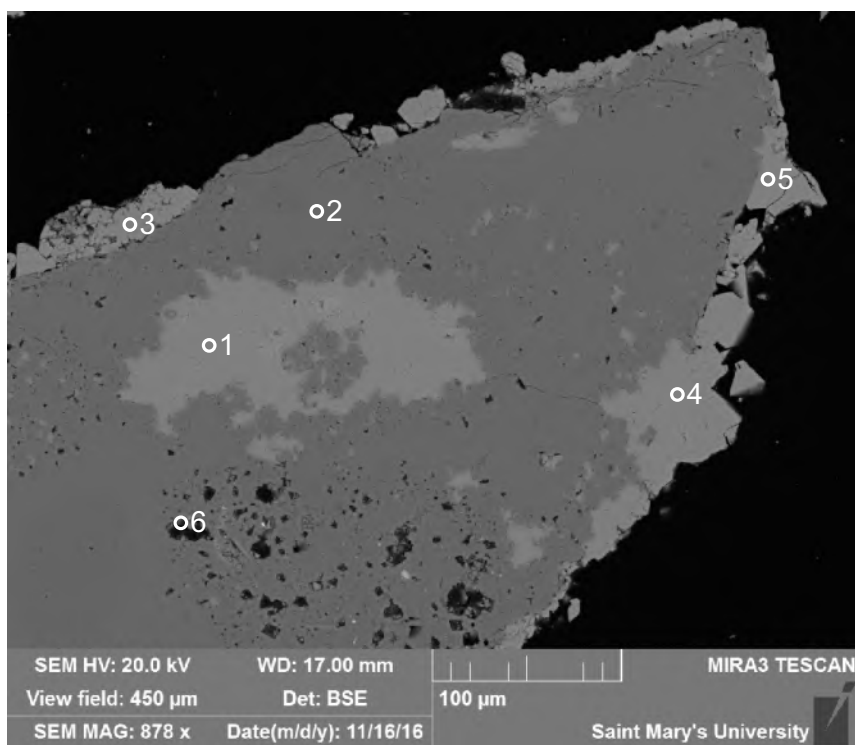

- 1: Calcite
- 2: Quartz
- 3: Calcite
- 4: Calcite
- 5: Calcite
- 6: Quartz +

Figure A5.3: Sample S17 Site 1 (SEM). This site contains: detrital calcite (1, 3, 4, 5), and quartz (2, 6). Lithic clast: Quartz + Calcite (1-6, chert with residual limestone).

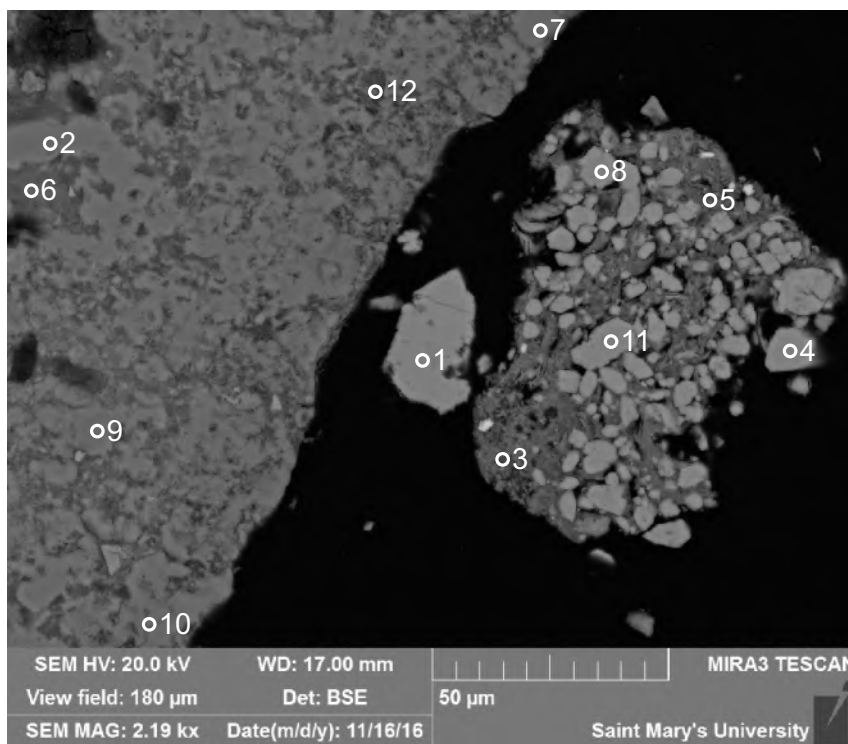

- 1: Calcite
- 2: Quartz
- 3: Garnet (Almandine)
- 4: Calcite
- 5: Garnet (Almandine)
- 6: Quartz
- 7: Quartz
- 8: Calcite+
- 9: Quartz
- 10: Quartz
- 11: Calcite +
- 12: Quartz +

Figure A5.4: Sample S17 Site 2 (SEM). This site contains: Detrital quartz (2, 6, 7, 9, 10, 12), garnet (3, 5), and calcite (4, 8, 11). Lithic clasts: Calcite + Garnet (3-5, 8, 11, siltstone with abundant calcite grains); Quartz (2, 6-7, 10, 12, chert or sandstone).

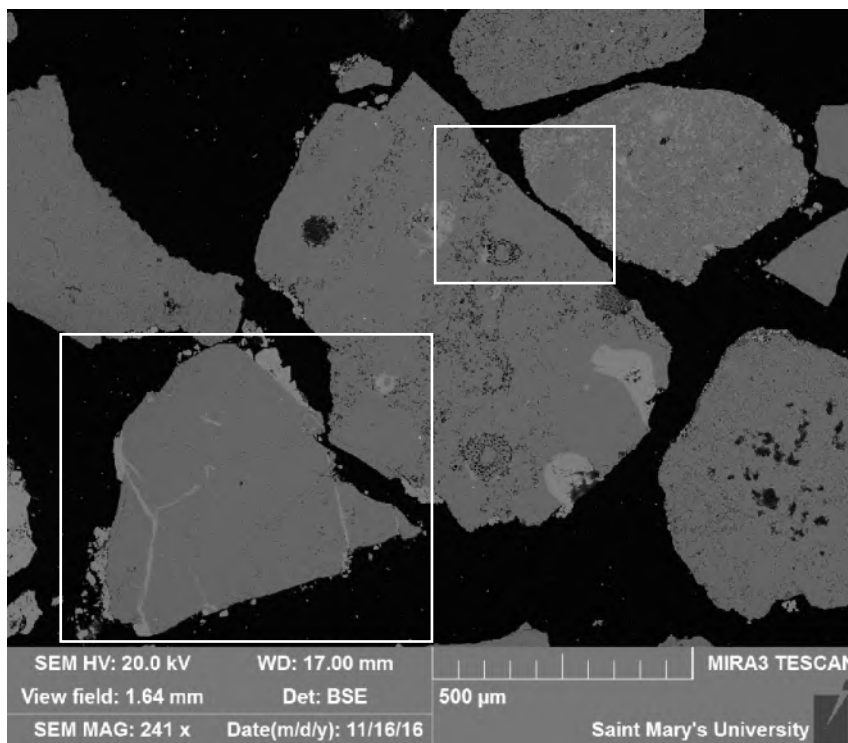

Figure A5.5: Sample S17 (SEM).



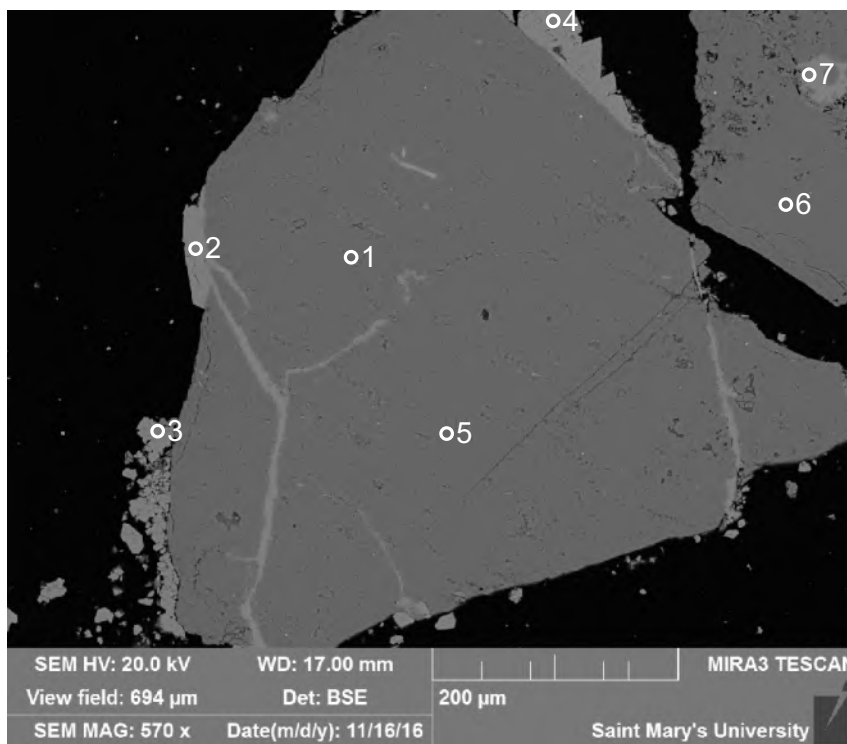

- 1: Quartz +
- 2: Calcite
- 3: Calcite +
- 4: Calcite
- 5: Quartz
- 6: Quartz
- 7: Calcite

Figure A5.6: Sample S17 Site 3 (SEM). This site contains: detrital quartz (1, 5, 6), and calcite (2, 3, 4, 7). Lithic clasts: Quartz + Calcite (1-5, ?quartz vein, hydrothermal); Quartz + Calcite (6-7, chert with residual limestone).

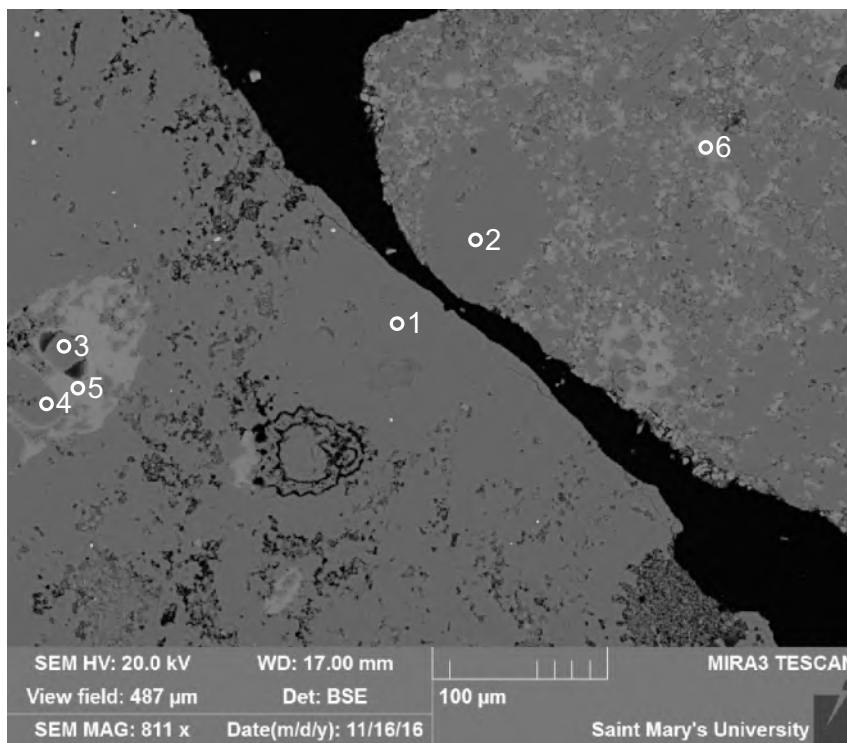

- 1: Quartz
- 2: Quartz
- 3: Quartz
- 4: Quartz
- 5: Calcite
- 6: Calcite

Figure A5.7: Sample S17 Site 4 (SEM). This site contains: detrital quartz (1, 2, 3, 4), and calcite (5, 6). Lithic clasts: Quartz + Calcite (2-6 and 1,3-5, chert with residual limestone).

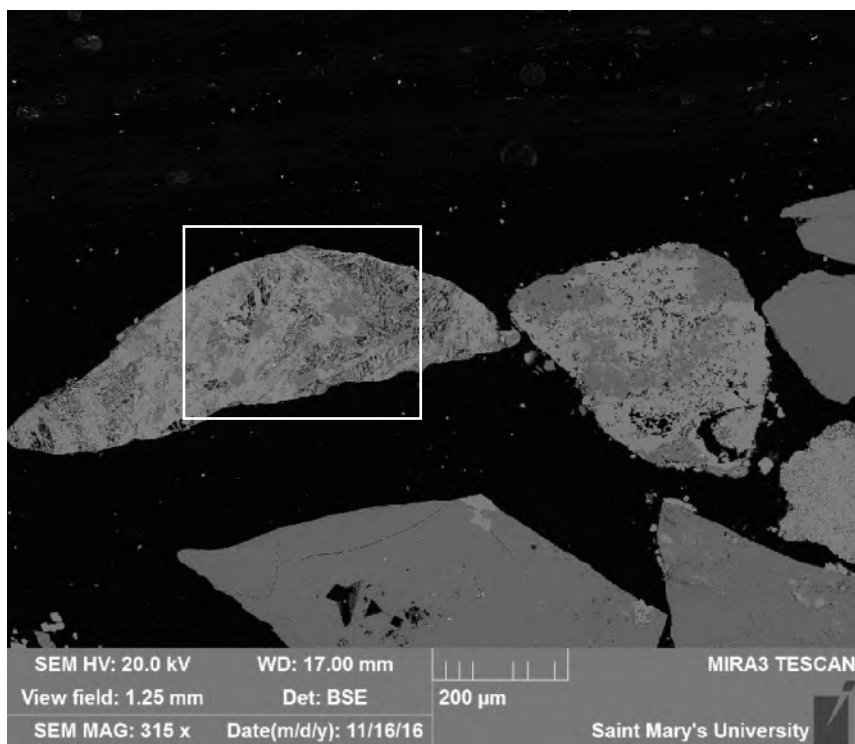

Figure A5.8: Sample S17 (SEM).

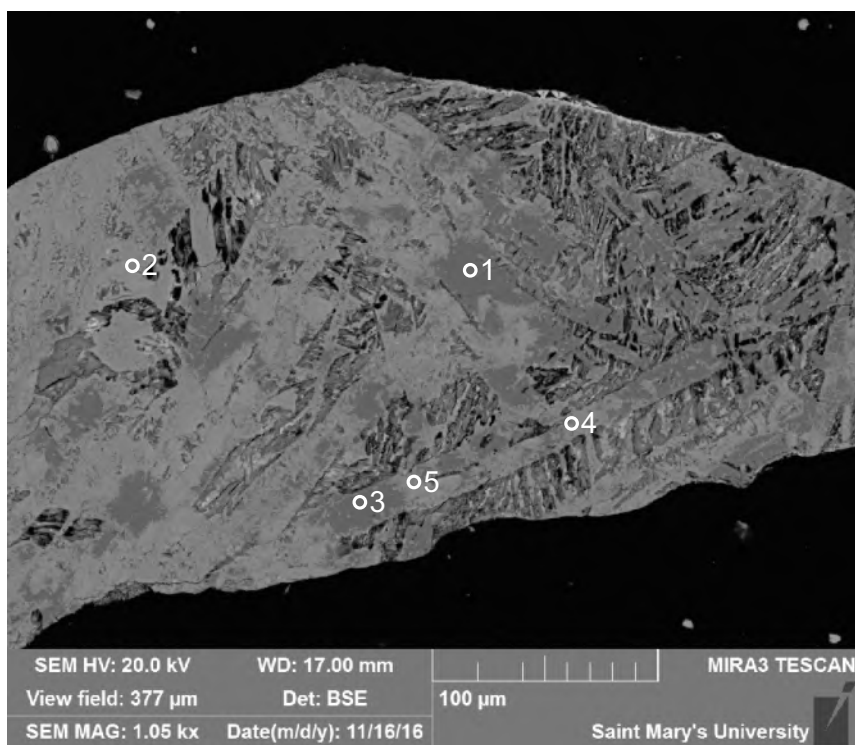

- 1: Quartz
- 2: Epidote
- 3: Quartz
- 4: Epidote
- 5: Epidote

Figure A5.9: Sample S17 Site 5 (SEM). This site contains: Detrital quartz (1, 3), which is cut by epidote (2, 4, 5). Lithic clast: Epidote + Quartz (1-5, epidote-quartz vein, hydrothermal).

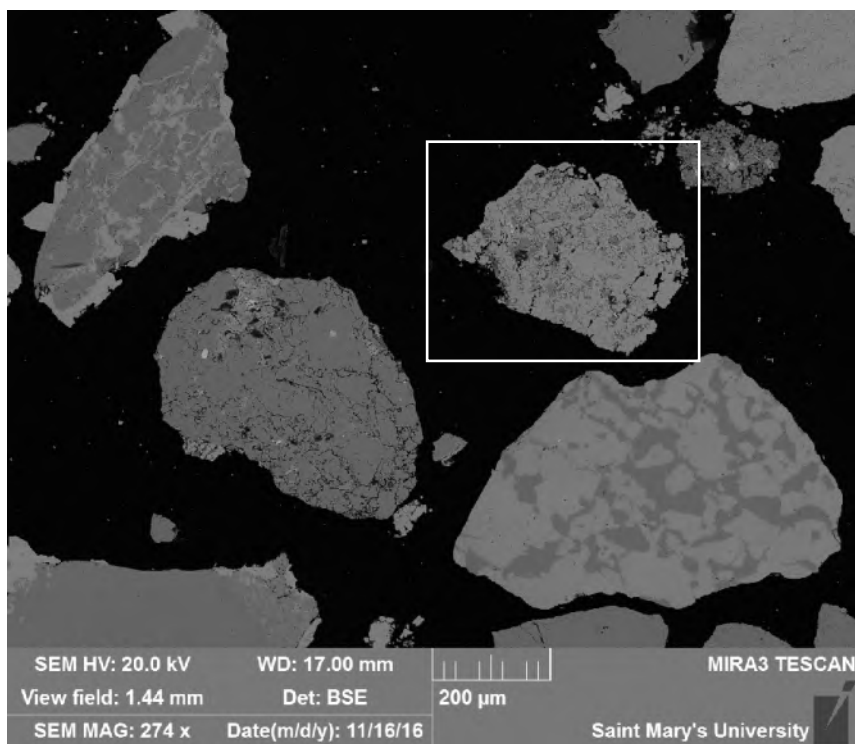

Figure A5.10: Sample S17 (SEM).

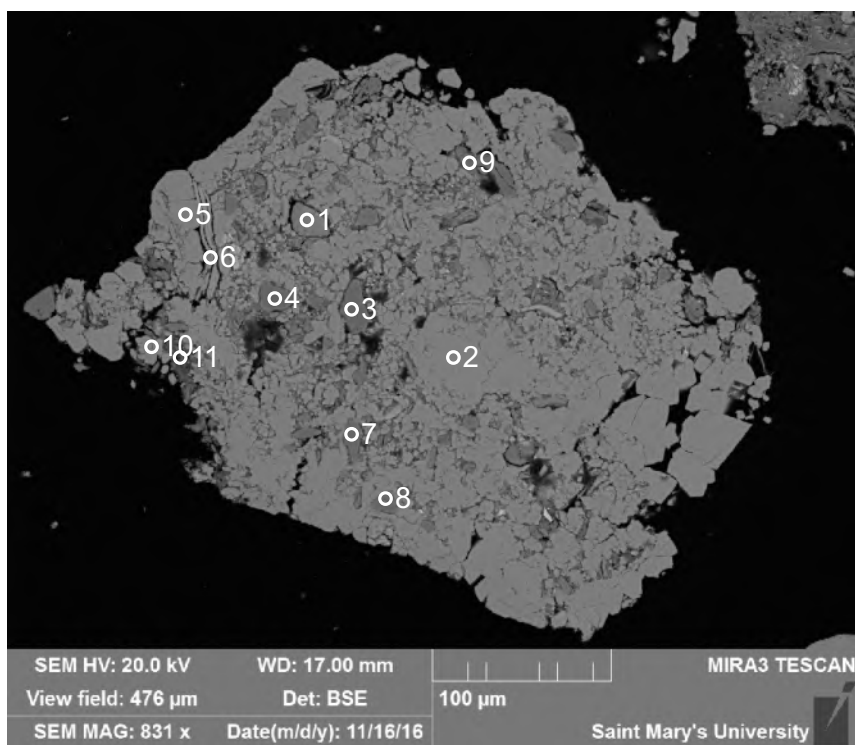

- 1: Biotite+
- 2: Calcite
- 3: Quartz
- 4: Quartz
- 5: Calcite
- 6: Chlorite +
- 7: Albite
- 8: Quartz +
- 9: Albite
- 10: Calcite+
- 11: Mix

Figure A5.11: Sample S17 Site 6 (SEM). This site contains: Detrital calcite (2, 5, 10), quartz (3, 4, 8), biotite (1), chlorite (6), and albite (7, 9). Lithic clast: Quartz + Calcite (1-11, calcareous siltstone).

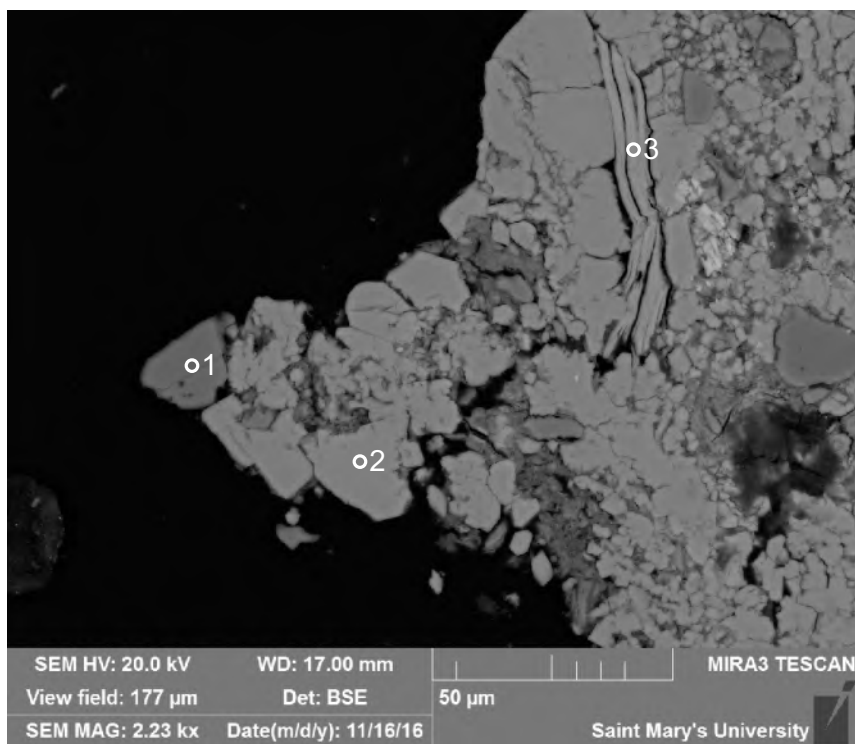

- 1: Albite
- 2: Calcite+
- 3: Chlorite +

Figure A5.12: Sample S17 Site 7 (SEM). This site contains: Detrital calcite (2), chlorite (3), and albite (1). Lithic clast: Calcite + Chlorite + Albite (1-3, calcareous siltstone).

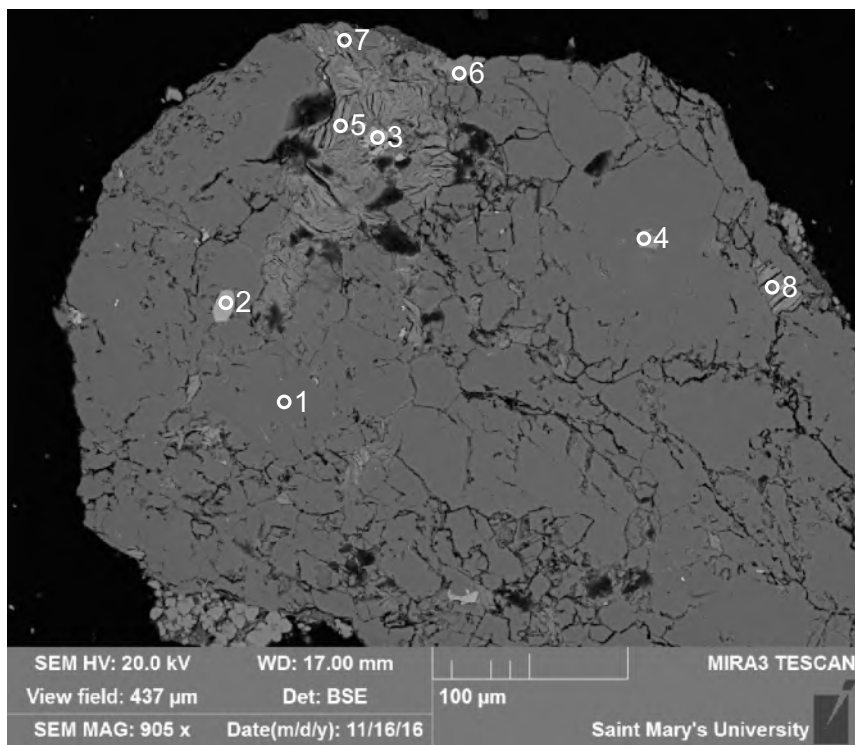

- 1: Quartz
- 2: Apatite
- 3: Titanite
- 4: Epidote
- 5: Chlorite +
- 6: Calcite+
- 7: Chlorite +
- 8: Chlorite +

Figure A5.13: Sample S17 Site 8 (SEM). This site contains: detrital quartz (1), calcite (6), apatite (2), titanite (3), epidote (4), and chlorite (5, 7, 8). Lithic clast: Quartz + Apatite + Titanite + Epidote + Chlorite + Calcite (1-8, ?sandstone).



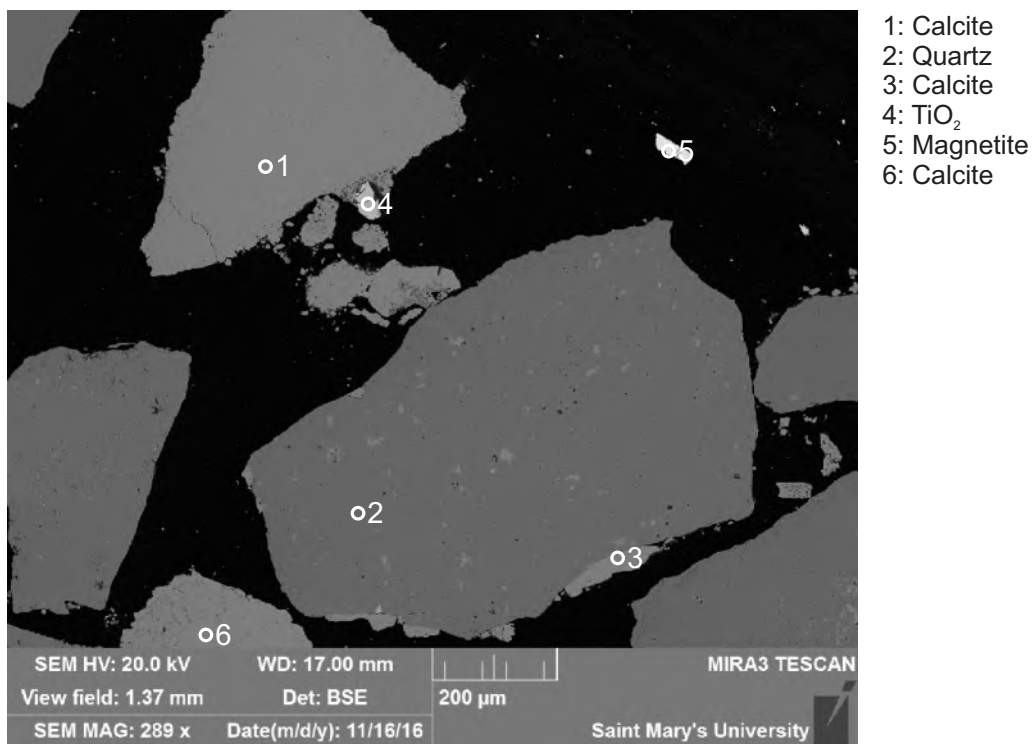

Figure A5.14: Sample S17 Site 9 (SEM). This site contains: Detrital calcite (1, 3, 6), quartz (2),  $\text{TiO}_2$  (4), and magnetite (5). Lithic clast: Quartz + Calcite (2-3, ?quartz vein).

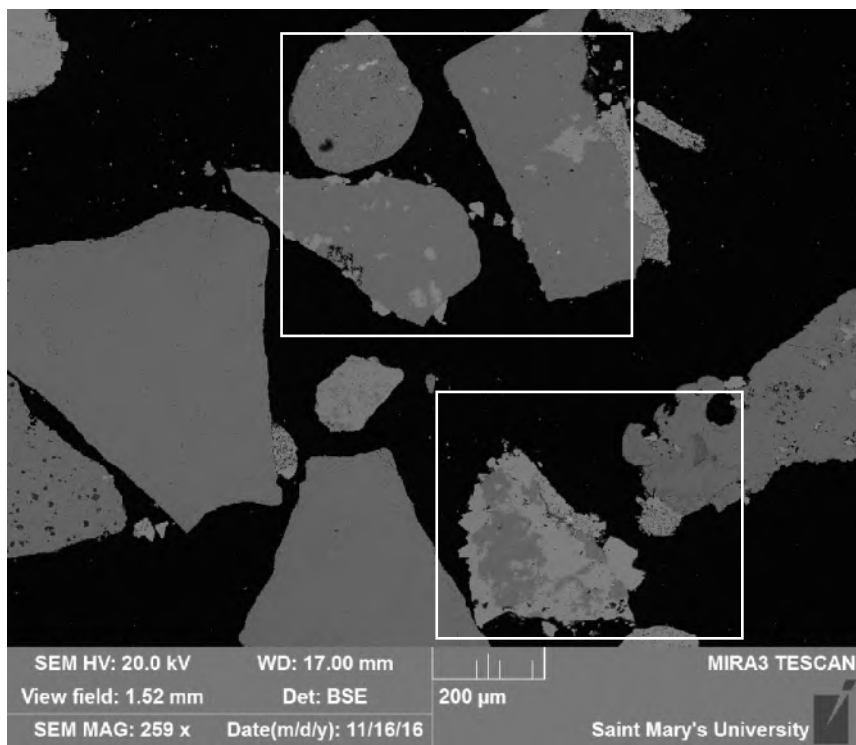

Figure A5.15: Sample S17 (SEM).

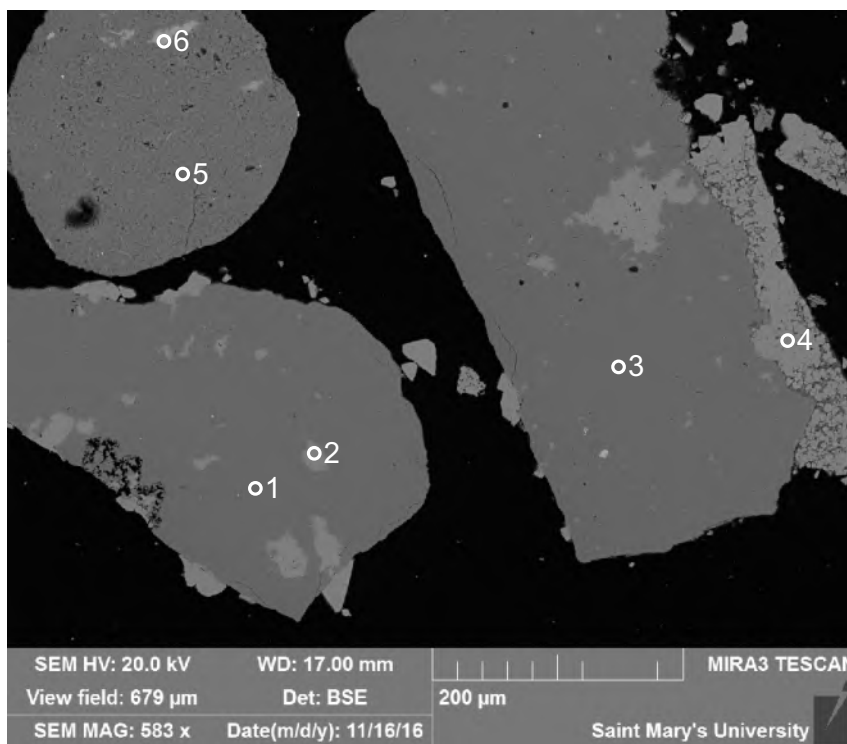

- 1: Quartz
- 2: Calcite
- 3: Quartz
- 4: Calcite
- 5: Quartz
- 6: Apatite

Figure A5.16: Sample S17 Site 10 (SEM). This site contains: detrital quartz (1, 3, 5), calcite (2, 4), and apatite (6). Lithic clasts: Quartz + Calcite (1-2, 3-4, quartz veins, hydrothermal); Quartz + Apatite (5-6, quartz vein, hydrothermal).

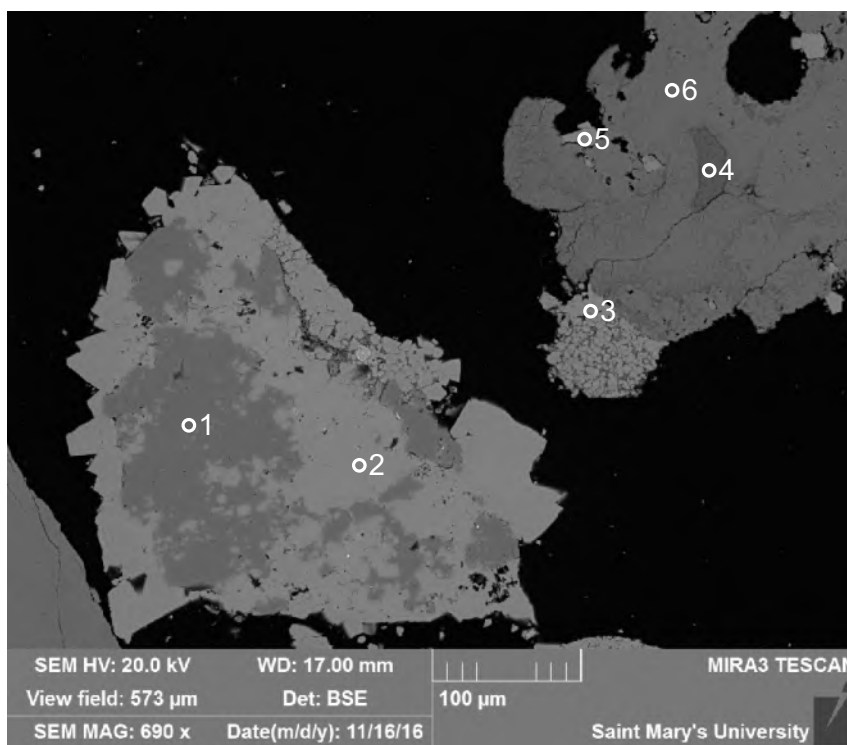

- 1: Quartz+Calcite
- 2: Calcite
- 3: Calcite
- 4: Quartz
- 5: Calcite
- 6: Quartz

Figure A5.17: Sample S17 Site 11 (SEM). This site contains: detrital quartz (1, 4, 6), and calcite (1, 2, 3, 5). Lithic clasts: Quartz + Calcite (1-2, 3-6, ?chert with residual limestone).

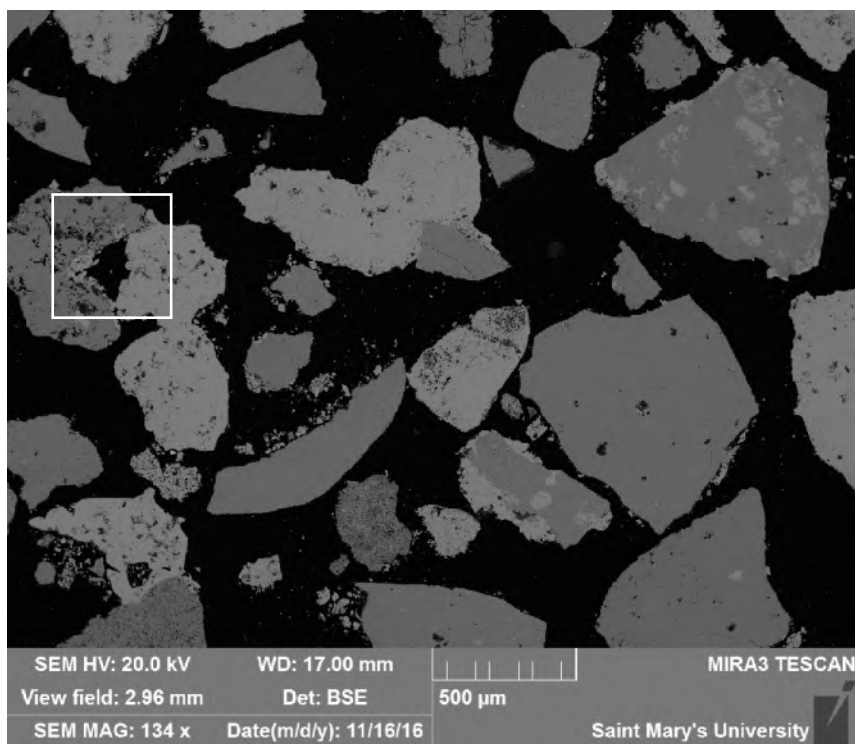

Figure A5.18: Sample S17 (SEM).

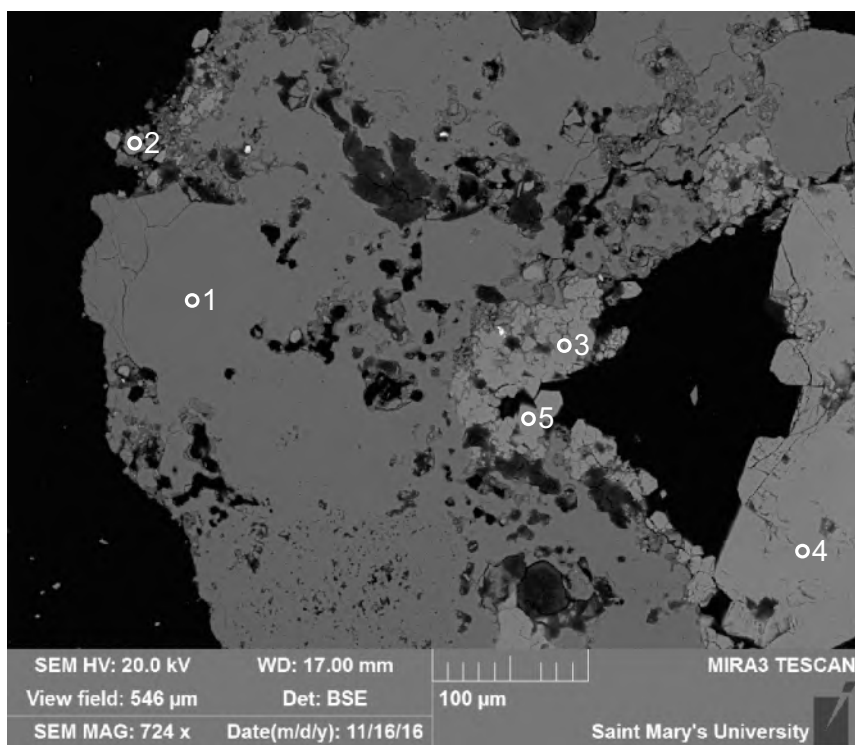

- 1: Quartz
- 2: Calcite+
- 3: Calcite+
- 4: Calcite
- 5: Calcite

Figure A5.19: Sample S17 Site 12 (SEM). This site contains: detrital quartz (1), and calcite (2, 3, 4, 5). Lithic clast: Quartz + Calcite (1-5, chert with residual limestone).

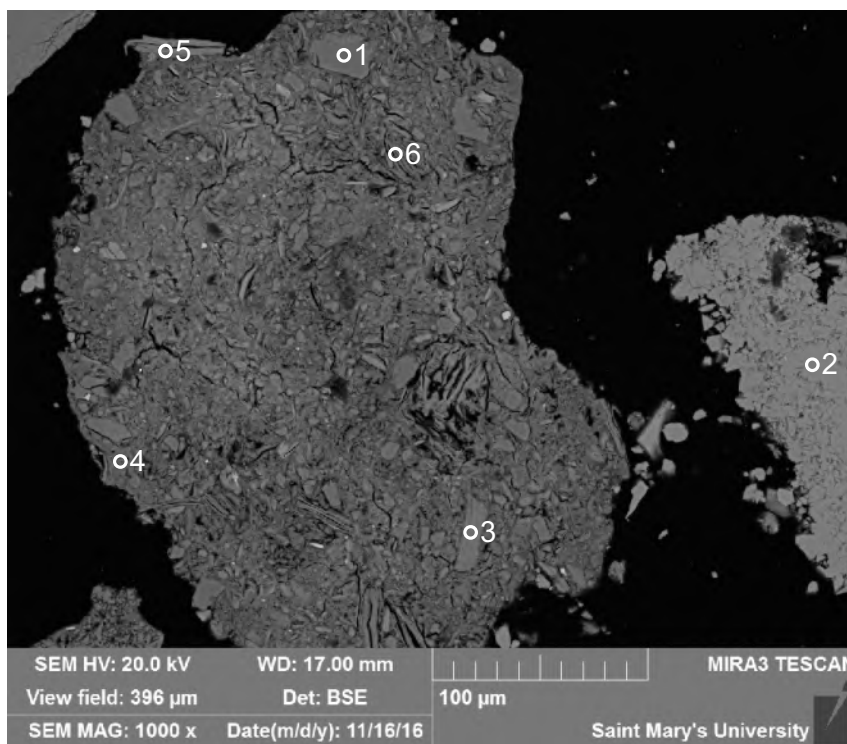

- 1: Quartz
- 2: Calcite
- 3: Muscovite
- 4: Mix
- 5: Muscovite
- 6: Muscovite

Figure A5.20: Sample S17 Site 13 (SEM). This site contains: Detrital quartz (1), muscovite (3, 5, 6), and calcite (2). Lithic clast: Quartz + Muscovite (1,3-6, siltstone).

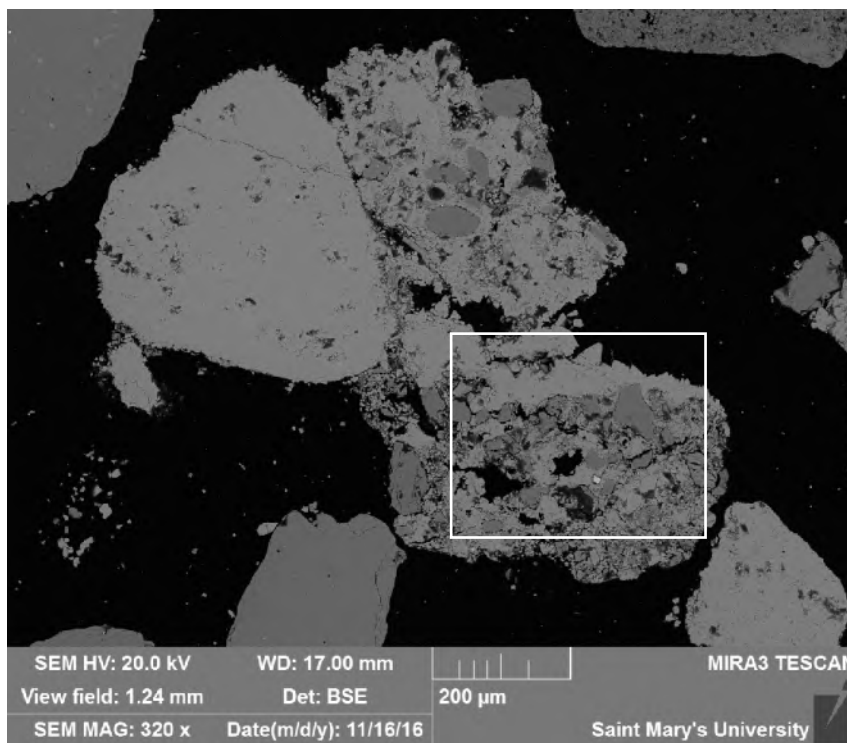

Figure A5.21: Sample S17 (SEM).



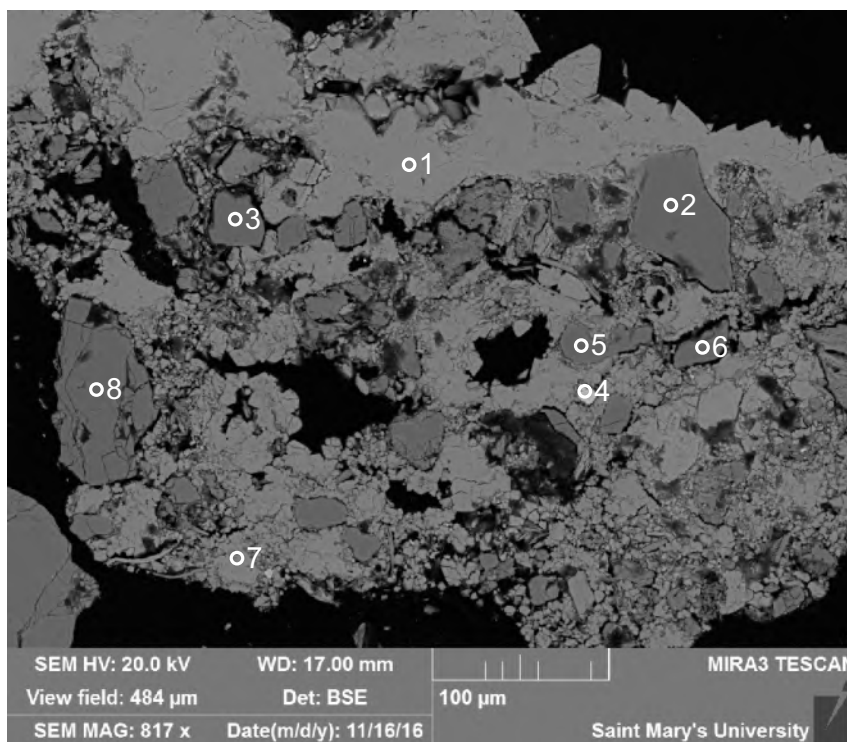

- 1: Calcite
- 2: Quartz
- 3: Quartz
- 4:  $\text{TiO}_2$  +
- 5: Quartz
- 6: Quartz
- 7: Calcite+
- 8: Quartz

Figure A5.22: Sample S17 Site 14 (SEM). This site contains: Detrital quartz (2, 3, 5, 6, 8), calcite (1, 7), and  $\text{TiO}_2$  (4). Lithic clast: Quartz + Calcite +  $\text{TiO}_2$  (1-8, sandy limestone).

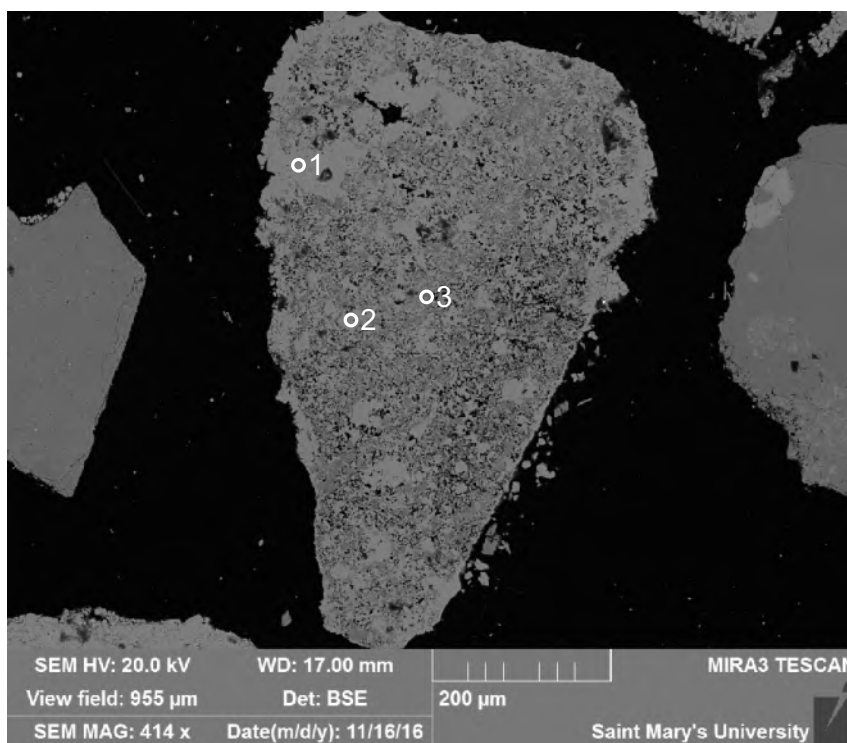

- 1: Calcite
- 2: Calcite
- 3: Quartz + Calcite +

Figure A5.23: Sample S17 Site 15 (SEM). This site contains: Detrital calcite (1-3), and quartz (3). Lithic clast: Calcite + Quartz (1-3, chert with residual limestone).

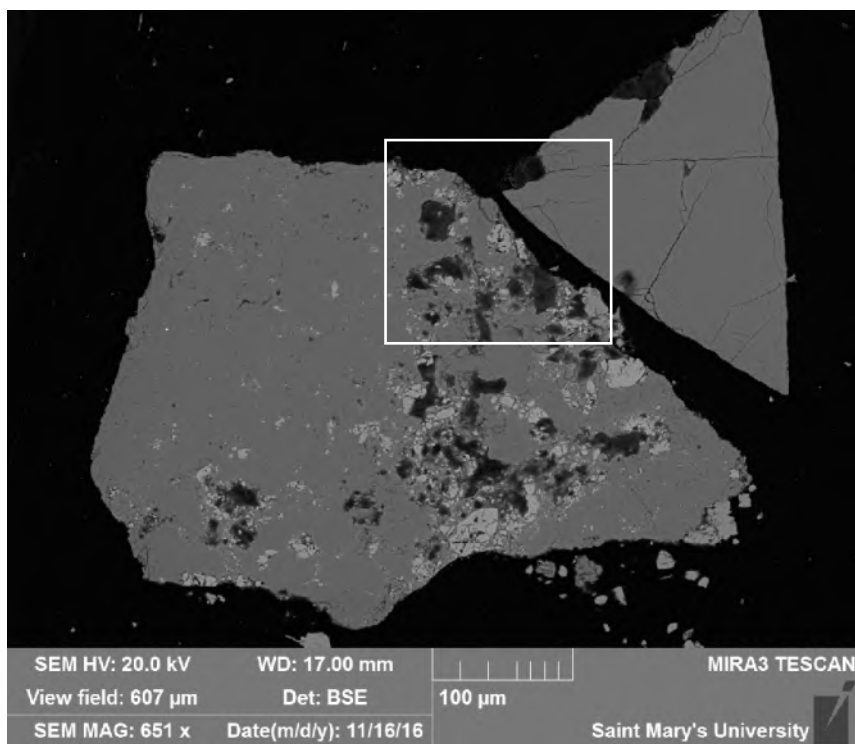

Figure A5.24: Sample S17 (SEM).

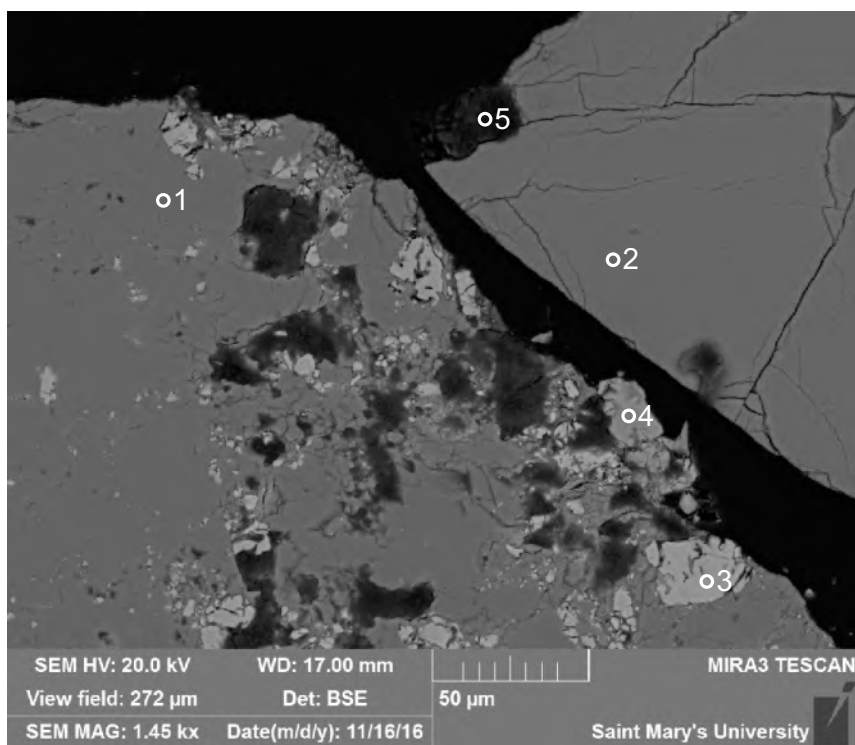

- 1: Quartz
- 2: Quartz
- 3: Epidote
- 4: Calcite+
- 5: Quartz+

Figure A5.25: Sample S17 Site 16 (SEM). This site contains: Detrital quartz (1, 2, 5), and epidote (3). Lithic clast: Quartz + Calcite + Epidote (1,3,4, chert with residual limestone or siltstone).

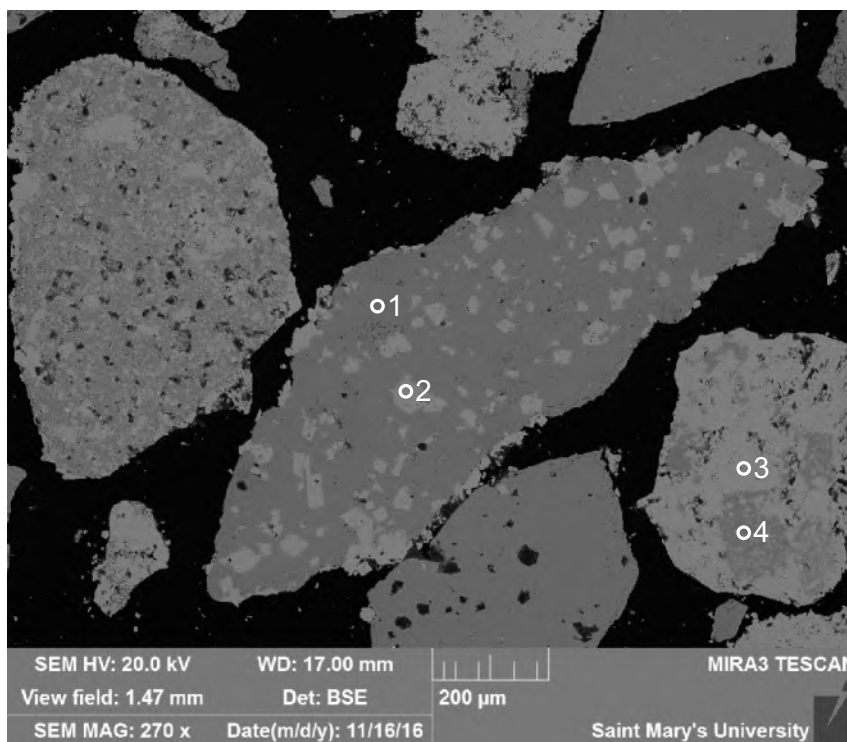

- 1: Quartz
- 2: Calcite+
- 3: Calcite
- 4: Quartz

Figure A5.26: Sample S17 Site 17 (SEM). This site contains: quartz (1,4), and calcite (2,3). Lithic clasts: Quartz + Calcite (1-2, chert with residual limestone); Quartz + Calcite (3-4, ?cherty limestone).

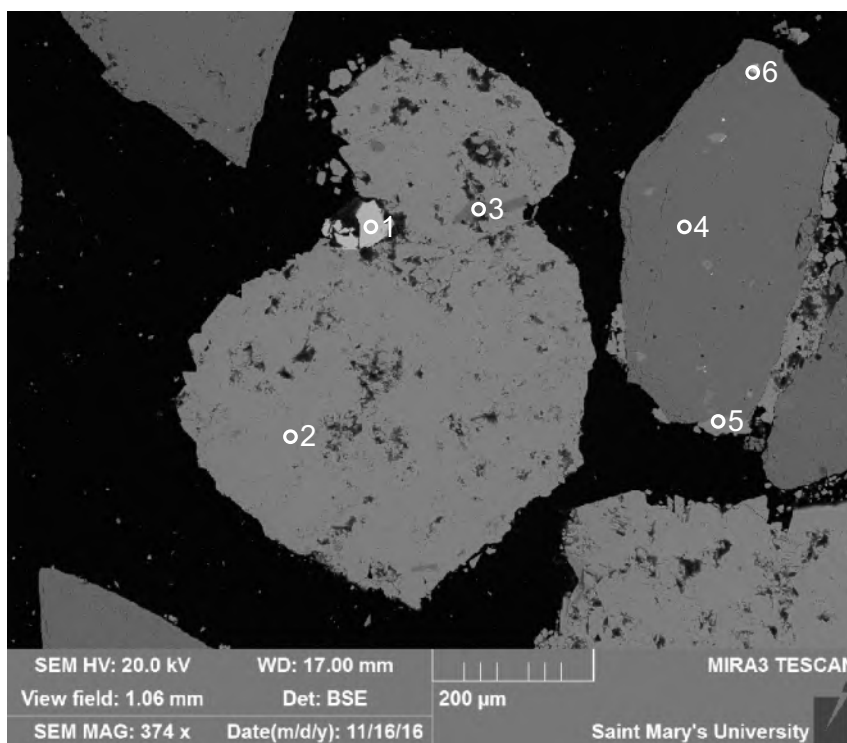

- 1: Spinel
- 2: Calcite
- 3: Quartz
- 4: Quartz
- 5: Calcite
- 6: Fe-oxide/hydroxide +

Figure A5.27: Sample S17 Site 18 (SEM). This site contains: Detrital calcite (2,5), quartz (3,4), and spinel (1), and Fe-oxide/hydroxide (6). Lithic clasts: Quartz + Fe-oxide/hydroxide (4-6, hydrothermal quartz vein); Quartz + Calcite + Spinel (1-3, ?sandstone).



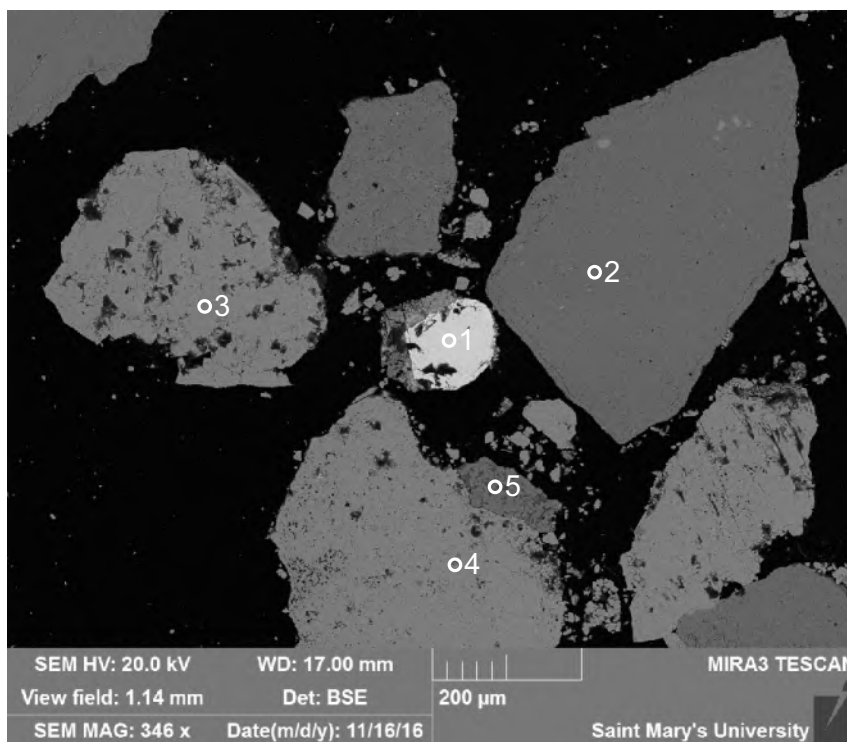

- 1: Chromite
- 2: Quartz
- 3: Calcite
- 4: Calcite
- 5: Quartz

Figure A5.28: Sample S17 Site 19 (SEM). This site contains: Detrital chromite (1), quartz (2, 5), and calcite (3, 4). Lithic clast: Calcite + Quartz (4-5, cherty limestone).

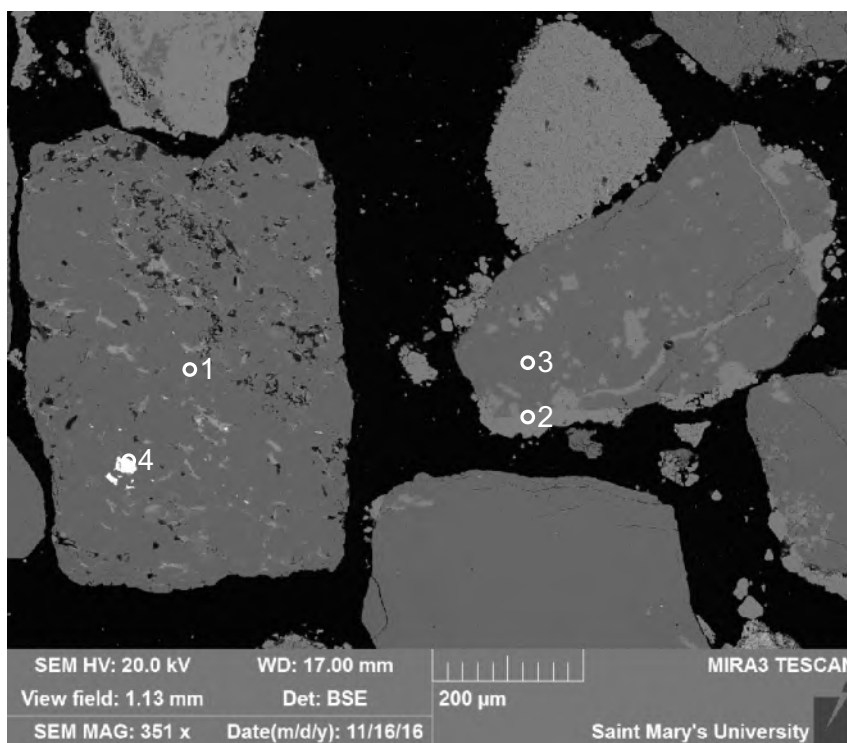

- 1: Quartz
- 2: Calcite + Quartz
- 3: Quartz
- 4: Zircon

Figure A5.29: Sample S17 Site 20 (SEM). This site contains: detrital quartz (1), zircon (4), and calcite (2). Lithic clasts: Quartz + Calcite (2-3, quartz vein, hydrothermal); Quartz + Calcite + Zircon (1,4, chert with residual limestone).



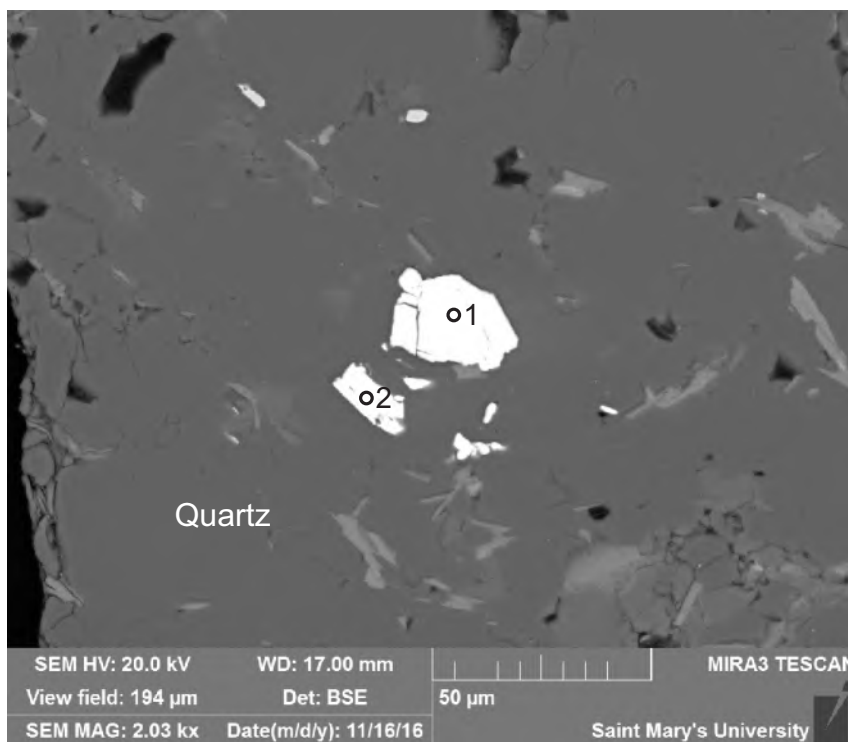

- 1: Zircon
- 2: Zircon

Figure A5.30: Sample S17 Site 21 (SEM). This site contains: Detrital zircon (1, 2) in quartz.

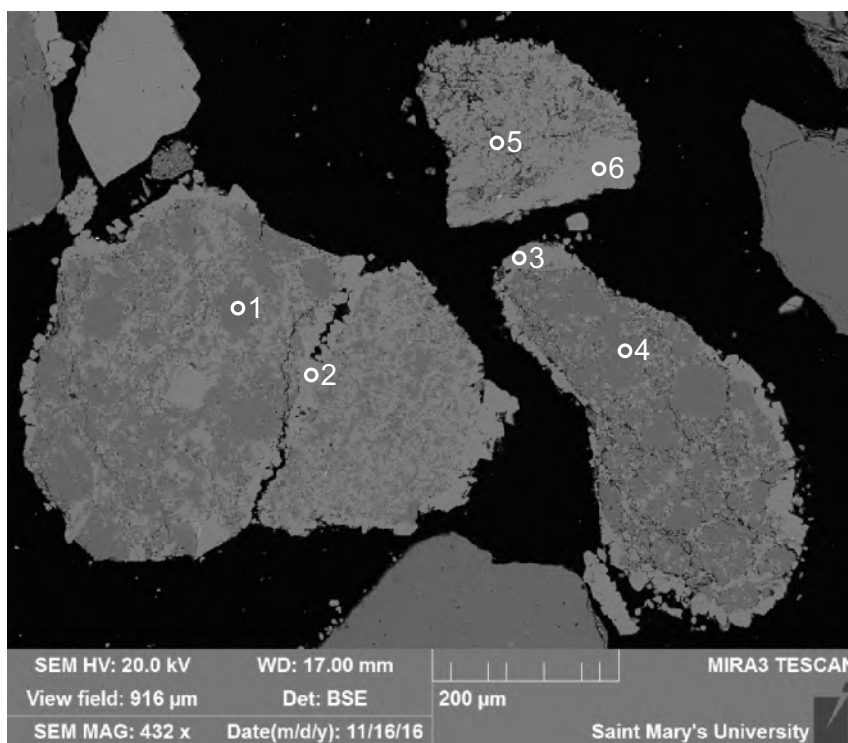

- 1: Quartz
- 2: Calcite
- 3: Calcite
- 4: Quartz + Chlorite
- 5: Quartz
- 6: Calcite

Figure A5.31: Sample S17 Site 22 (SEM). This site contains: Detrital quartz (1,4-5), and calcite (2-3,6). Lithic clasts: Quartz + Calcite (1-2,3-4,5-6, chert with residual limestone).

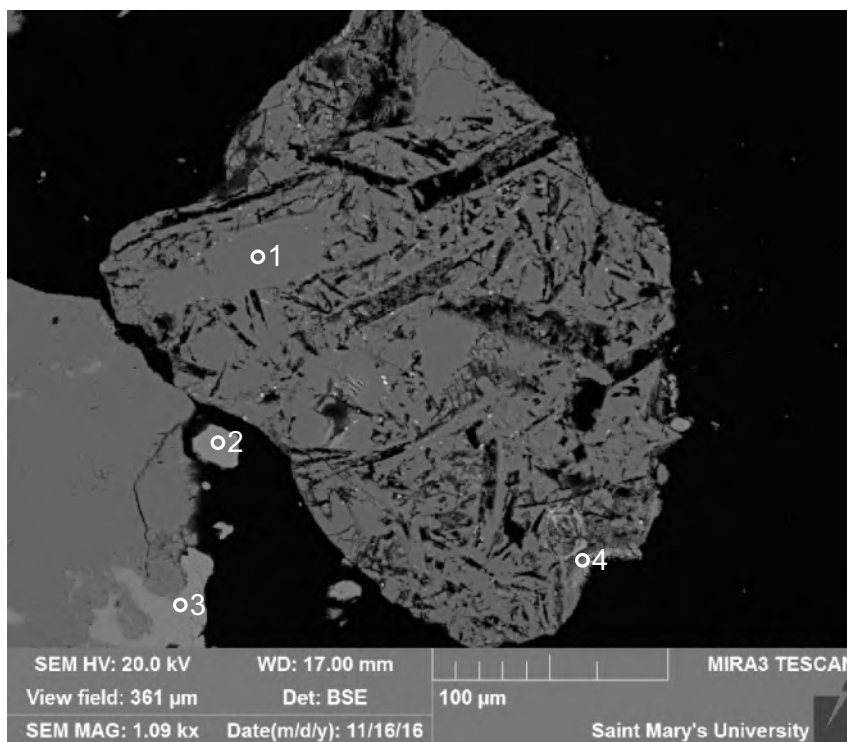

- 1: Quartz
- 2: Calcite
- 3: Calcite
- 4: Fe-Chlorite or Mix (altered mineral)

Figure A5.32: Sample S17 Site 23 (SEM). This site contains: detrital quartz (1), and chlorite (4). Lithic clast: Quartz + Chlorite (1,4, quartz vein, hydrothermal).

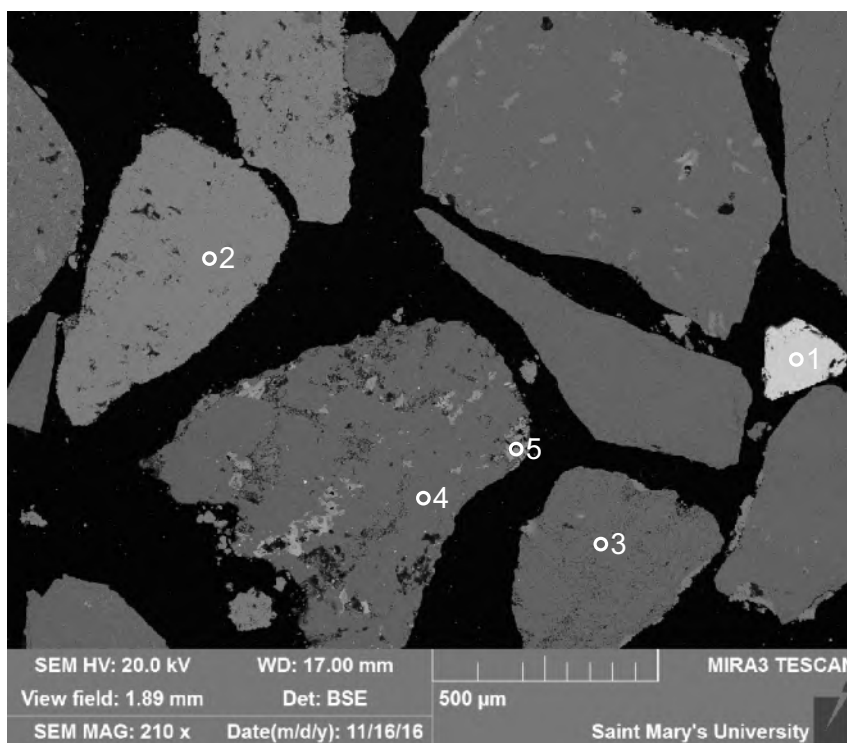

- 1: Chromite
- 2: Calcite
- 3: Quartz
- 4: Quartz
- 5: Epidote

Figure A5.33: Sample S17 Site 24 (SEM). This site contains: Detrital chromite (1), calcite (2), quartz (3, 4), and epidote (5). Lithic clast: Quartz + Epidote (4,5, quartz crystal with epidote inclusion, hydrothermal).

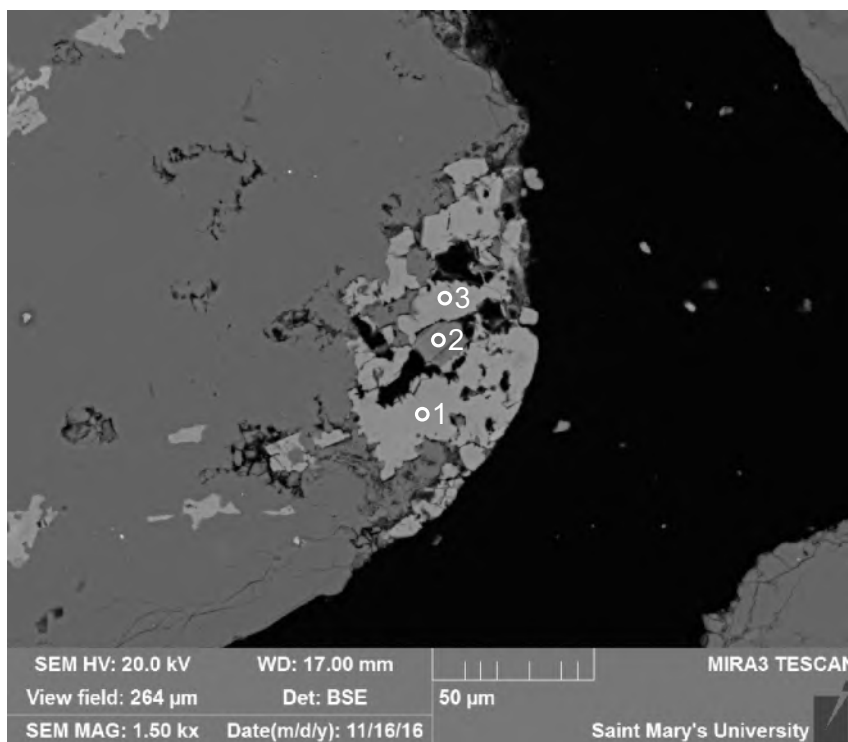

- 1: Epidote
- 2: Muscovite
- 3: Epidote

Figure A5.34: Sample S17 Site 25 (SEM). This site contains: Detrital epidote (1, 3), and muscovite (2).

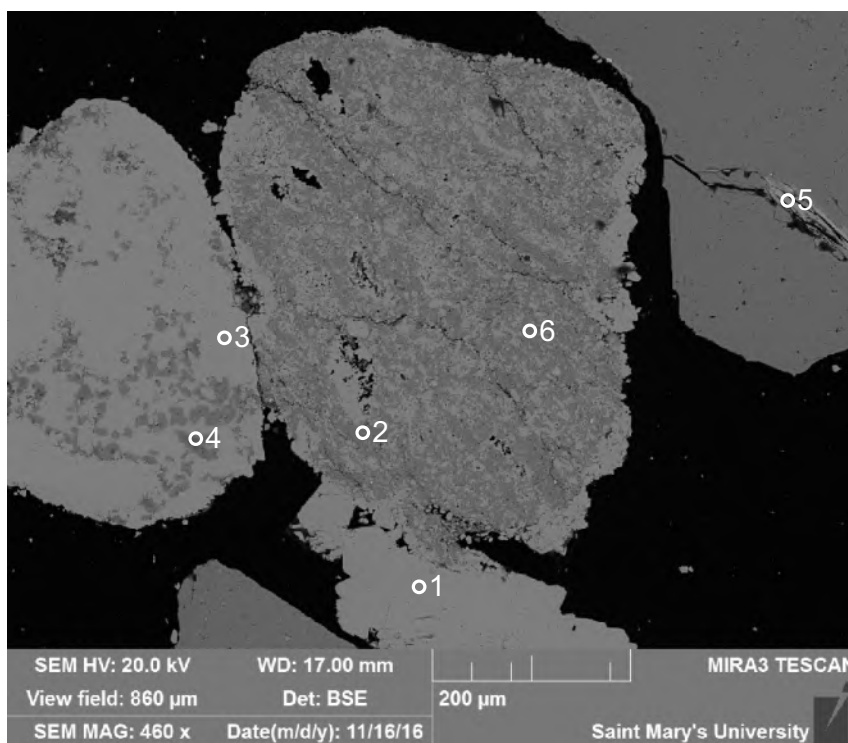

- 1: Calcite
- 2: Quartz+
- 3: Calcite
- 4: Quartz
- 5: Chlorite + Muscovite
- 6: Quartz + Albite

Figure A5.35: Sample S17 Site 26 (SEM). This site contains: Detrital calcite (1,3), quartz (2,4), quartz and albite (6), and muscovite and chlorite (5). Lithic clasts: Calcite + Quartz (3-4, cherty limestone); Quartz + Calcite + Muscovite (1-2,6, chert with residual limestone or siltstone).

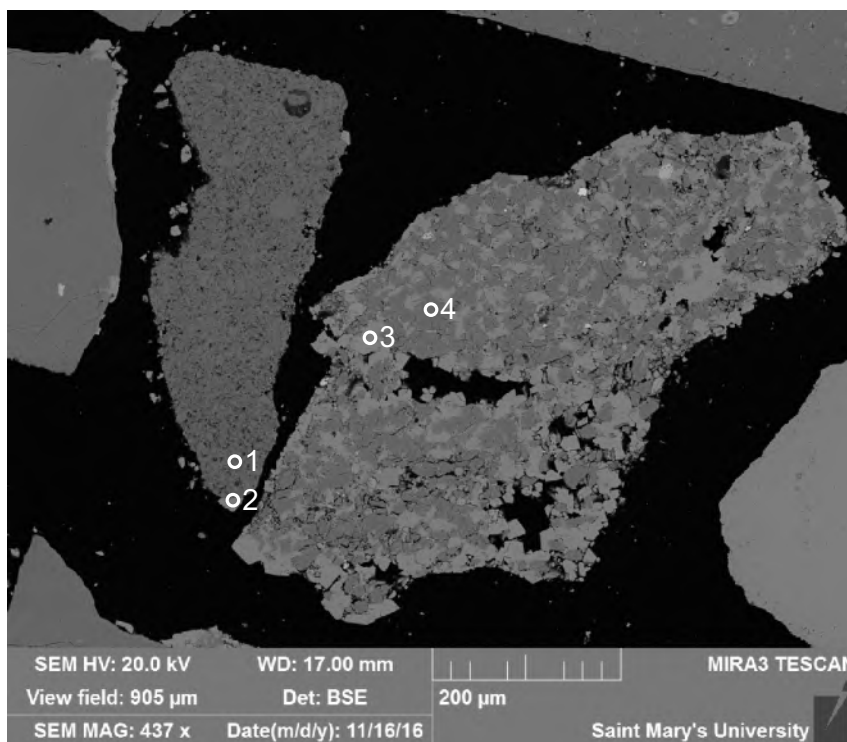

- 1: Quartz
- 2: Calcite
- 3: Calcite
- 4: Quartz

Figure A5.36: Sample S17 Site 27 (SEM). This site contains: Detrital quartz (1,4), and calcite (2-3). Lithic clasts: Quartz + Calcite (1-2,3-4, calcareous sandstone).

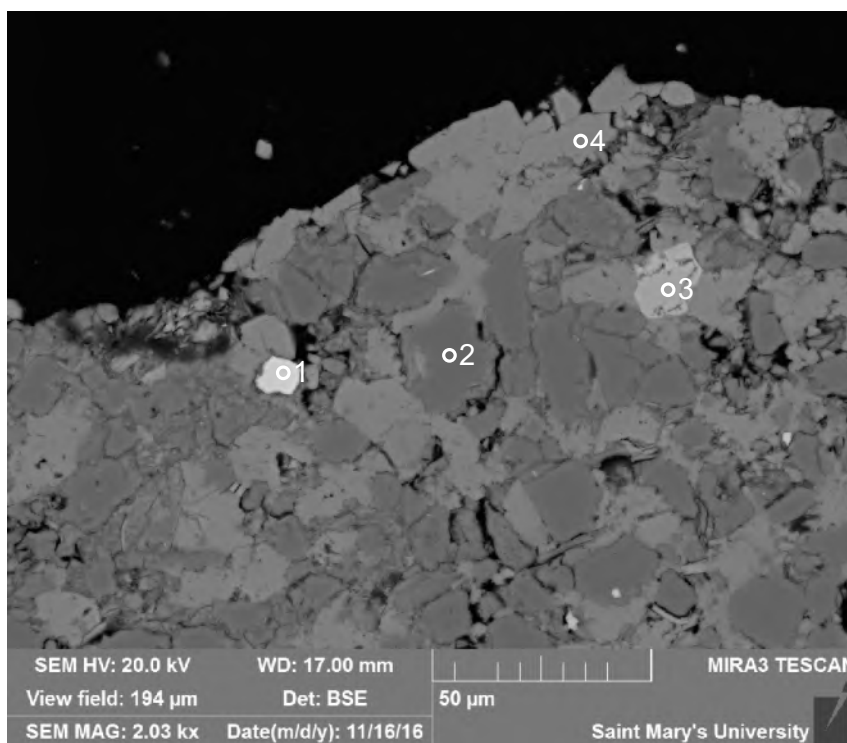

- 1:  $\text{TiO}_2$  +
- 2: Quartz
- 3: Apatite
- 4: Calcite+

Figure A5.37: Sample S17 Site 28 (SEM). This site contains: detrital quartz (2), apatite (3), calcite (4), and  $\text{TiO}_2$  (1). Lithic clast: Quartz + Calcite (1-4, chert with residual limestone or calcareous siltstone).



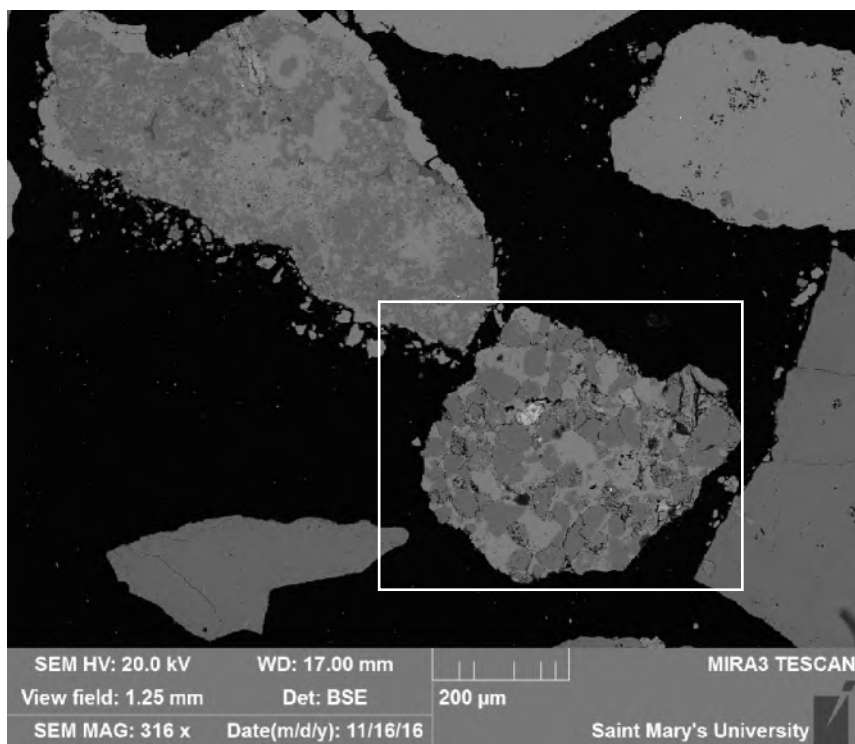

Figure A5.38: Sample S17 (SEM).

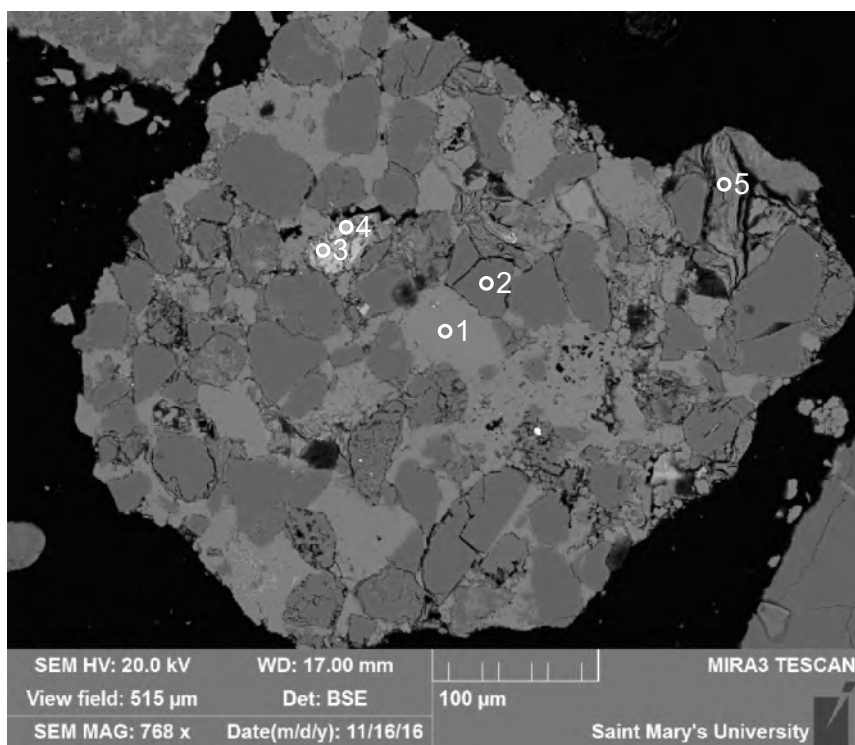

- 1: Calcite
- 2: Albite
- 3: "Ilm" +
- 4: "Ilm" +
- 5: Mix

Figure A5.39: Sample S17 Site 29 (SEM). This site contains: Detrital calcite (1), albite (2), and altered ilmenite (3,4). Lithic clast: Calcite + Albite + "Ilmenite" (1-4, calcareous sandstone).

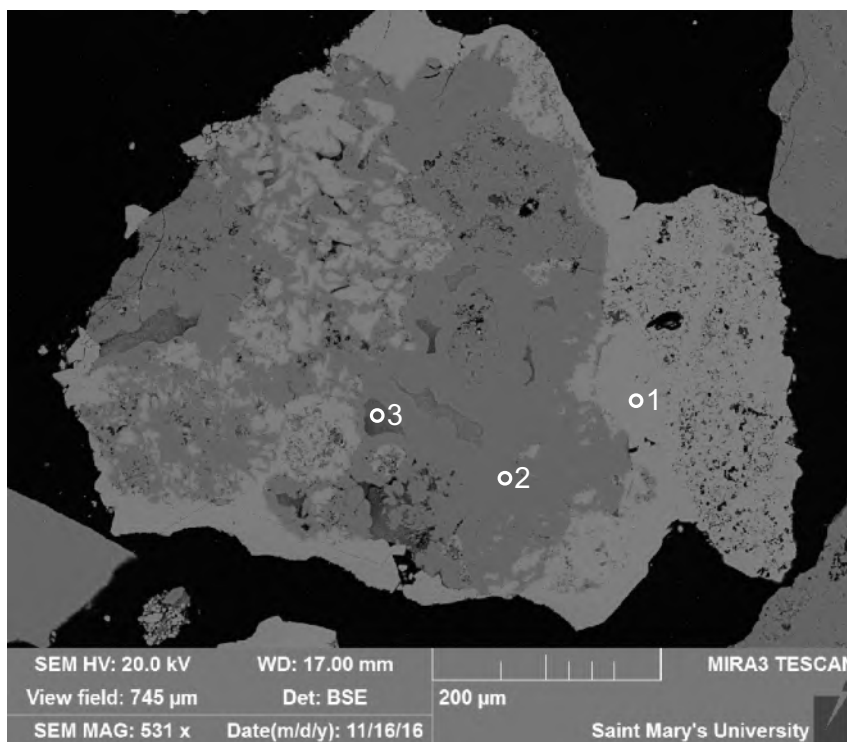

- 1: Calcite
- 2: Quartz
- 3: Quartz

Figure A5.40: Sample S17 Site 30 (SEM). This site contains: Detrital calcite (1), and quartz (2-3). Lithic clast: Quartz + Calcite (1-3, sandy limestone or chert with residual limestone).

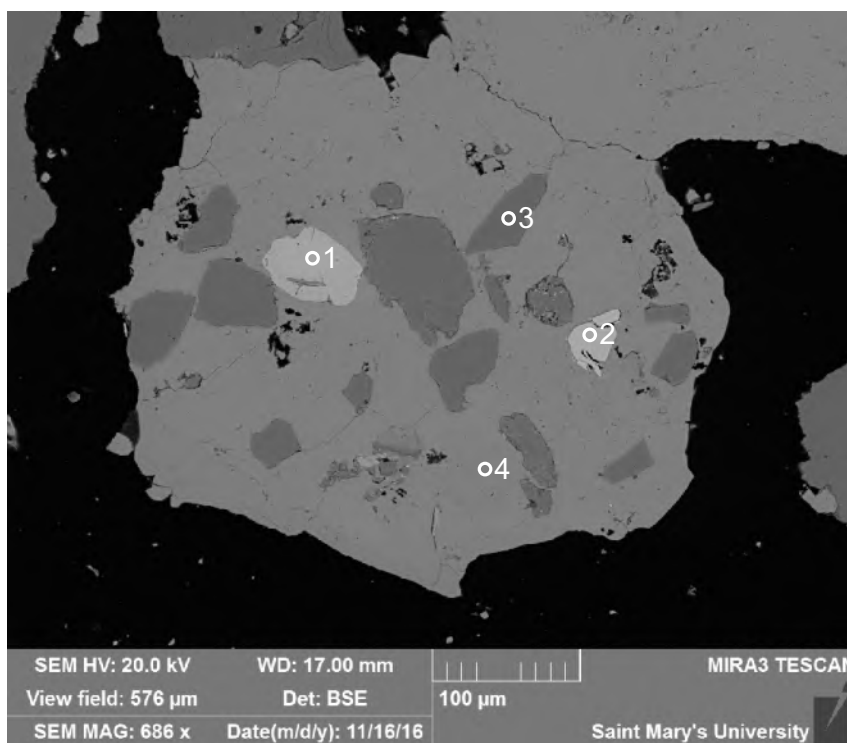

- 1: Apatite
- 2: Garnet (Almandine)
- 3: Quartz
- 4: Calcite

Figure A5.41: Sample S17 Site 31 (SEM). This site contains: Detrital calcite (4), quartz (3), apatite (1), and garnet (2). Lithic clast: Calcite + Quartz + Apatite + Garnet (1-4, sandy limestone or calcareous sandstone).

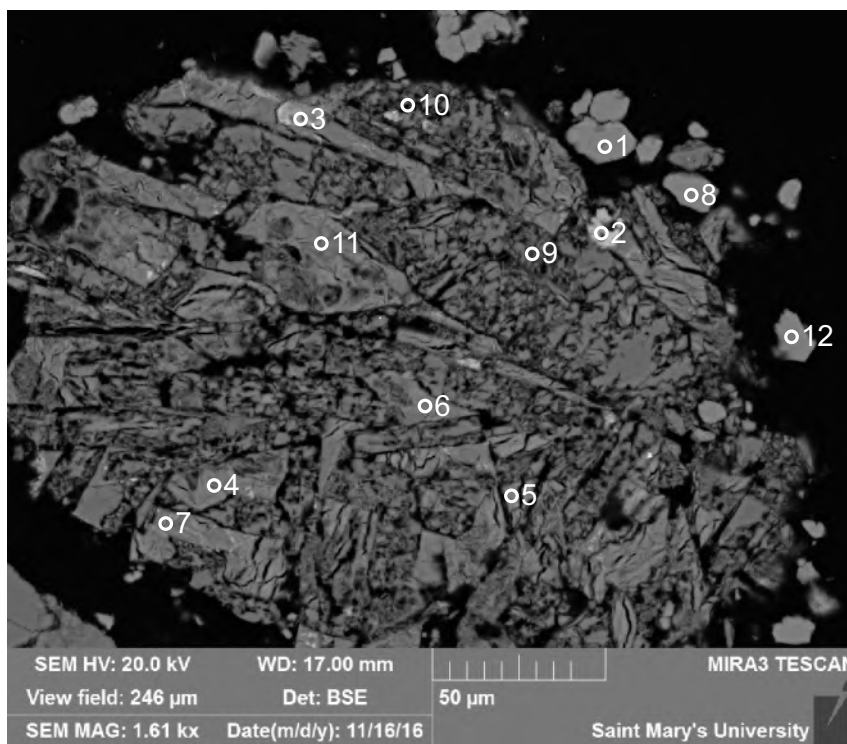

- 1: Calcite +
- 2: Titanite +
- 3: Titanite
- 4: Mix
- 5: Mix
- 6: Mix
- 7: Mix
- 8: Calcite
- 9: Muscovite +
- 10: Feldspar + Chlorite
- 11: Mix
- 12: Calcite

Figure A5.42: Sample S17 Site 32 (SEM). Very altered lithic clast of an igneous rock (hypabyssal mafic rock).

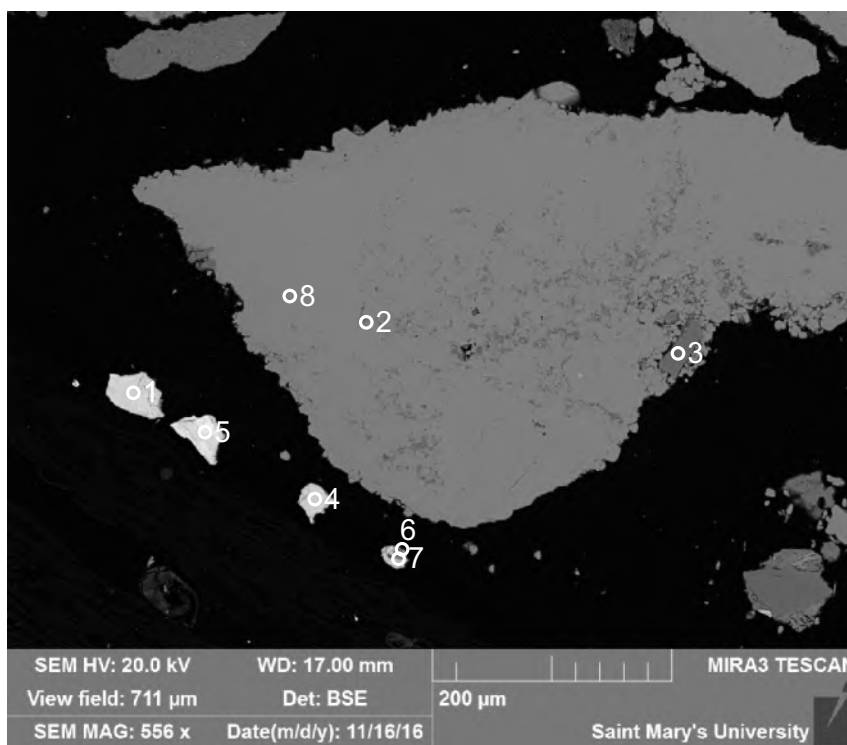

- 1: Magnetite
- 2: Calcite + Quartz +
- 3: Quartz
- 4: Magnetite
- 5: Magnetite
- 6: Quartz
- 7: Magnetite +
- 8: Calcite

Figure A5.43: Sample S17 Site 33 (SEM). Lithic clasts: Quartz + Calcite (2-3,8, cherty limestone); Magnetite + Quartz (6-7, igneous).

Table A5.1: EDS analyses of sample S17.

| Sample | Site | Position | Mineral   | SiO2   | TiO2 | Al2O3 | FeO   | MnO | MgO   | CaO   | Na2O | K2O  | P2O5 | SO3  | F | Cl   | Cr2O3 | ZnO | ZrO2 | Nb2O5 | Ce2O3 | Yb2O3 | HfO2 | WO3 | Total | Actual Total |
|--------|------|----------|-----------|--------|------|-------|-------|-----|-------|-------|------|------|------|------|---|------|-------|-----|------|-------|-------|-------|------|-----|-------|--------------|
| S17    | 1    | 1        | Cal       |        |      |       |       |     | 0.29  | 55.71 |      |      |      |      |   |      |       |     |      |       |       |       |      |     | 56    | 78           |
| S17    | 1    | 2        | Qz        | 100.00 |      |       |       |     |       |       |      |      |      |      |   |      |       |     |      |       |       |       |      |     | 100   | 161          |
| S17    | 1    | 3        | Cal       | 0.91   |      |       |       |     | 0.38  | 54.71 |      |      |      |      |   |      |       |     |      |       |       |       |      |     | 56    | 78           |
| S17    | 1    | 4        | Cal       |        |      |       |       |     |       | 56.00 |      |      |      |      |   |      |       |     |      |       |       |       |      |     | 56    | 78           |
| S17    | 1    | 5        | Cal       |        |      |       |       |     |       | 56.00 |      |      |      |      |   |      |       |     |      |       |       |       |      |     | 56    | 77           |
| S17    | 1    | 6        | Qz +      | 92.40  |      | 2.19  | 1.05  |     | 0.56  | 1.86  | 0.56 | 0.38 |      | 0.66 |   | 0.34 |       |     |      |       |       |       |      |     | 100   | 91           |
| S17    | 2    | 1        | Cal       | 0.76   |      |       |       |     | 0.28  | 54.96 |      |      |      |      |   |      |       |     |      |       |       |       |      |     | 56    | 76           |
| S17    | 2    | 2        | Qz        | 100.00 |      |       |       |     |       |       |      |      |      |      |   |      |       |     |      |       |       |       |      |     | 100   | 164          |
| S17    | 2    | 3        | Grt (Alm) | 34.34  | 0.54 | 14.21 | 33.94 |     | 6.04  | 5.99  | 0.44 | 0.40 | 4.10 |      |   |      |       |     |      |       |       |       |      |     | 100   | 83           |
| S17    | 2    | 4        | Cal       | 0.42   |      |       | 0.26  |     |       | 55.32 |      |      |      |      |   |      |       |     |      |       |       |       |      |     | 56    | 77           |
| S17    | 2    | 5        | Grt (Alm) | 43.40  | 0.84 | 18.53 | 17.61 |     | 7.79  | 8.47  | 0.52 | 1.56 | 1.03 |      |   | 0.26 |       |     |      |       |       |       |      |     | 100   | 98           |
| S17    | 2    | 6        | Qz        | 91.45  |      | 3.42  | 4.26  |     | 0.35  | 0.52  |      |      |      |      |   |      |       |     |      |       |       |       |      |     | 100   | 133          |
| S17    | 2    | 7        | Qz        | 100.00 |      |       |       |     |       |       |      |      |      |      |   |      |       |     |      |       |       |       |      |     | 100   | 157          |
| S17    | 2    | 8        | Cal+      | 4.11   |      | 1.72  | 0.94  |     | 0.49  | 92.57 |      | 0.18 |      |      |   |      |       |     |      |       |       |       |      |     | 100   | 78           |
| S17    | 2    | 9        | Qz        | 100.00 |      |       |       |     |       |       |      |      |      |      |   |      |       |     |      |       |       |       |      |     | 100   | 163          |
| S17    | 2    | 10       | Qz        | 98.66  |      | 0.63  | 0.50  |     |       | 0.22  |      |      |      |      |   |      |       |     |      |       |       |       |      |     | 100   | 145          |
| S17    | 2    | 11       | Cal +     | 1.49   |      | 0.52  | 0.44  |     | 0.24  | 53.32 |      |      |      |      |   |      |       |     |      |       |       |       |      |     | 56    | 77           |
| S17    | 2    | 12       | Qz +      | 91.87  |      | 4.33  | 2.57  |     | 0.48  | 0.75  |      |      |      |      |   |      |       |     |      |       |       |       |      |     | 100   | 120          |
| S17    | 3    | 1        | Qz +      | 97.50  |      | 1.65  | 0.42  |     |       |       |      | 0.43 |      |      |   |      |       |     |      |       |       |       |      |     | 100   | 153          |
| S17    | 3    | 2        | Cal       |        |      |       |       |     | 0.28  | 55.72 |      |      |      |      |   |      |       |     |      |       |       |       |      |     | 56    | 76           |
| S17    | 3    | 3        | Cal+      | 3.57   |      | 1.80  |       |     | 0.54  | 94.08 |      |      |      |      |   |      |       |     |      |       |       |       |      |     | 100   | 79           |
| S17    | 3    | 4        | Cal       |        |      |       |       |     | 0.41  | 55.59 |      |      |      |      |   |      |       |     |      |       |       |       |      |     | 56    | 77           |
| S17    | 3    | 5        | Qz        | 98.81  |      | 0.71  | 0.31  |     |       |       |      | 0.18 |      |      |   |      |       |     |      |       |       |       |      |     | 100   | 160          |
| S17    | 3    | 6        | Qz        | 100.00 |      |       |       |     |       |       |      |      |      |      |   |      |       |     |      |       |       |       |      |     | 100   | 160          |
| S17    | 3    | 7        | Cal       | 0.71   |      |       |       |     |       | 55.29 |      |      |      |      |   |      |       |     |      |       |       |       |      |     | 56    | 77           |
| S17    | 4    | 1        | Qz        | 100.00 |      |       |       |     |       |       |      |      |      |      |   |      |       |     |      |       |       |       |      |     | 100   | 159          |
| S17    | 4    | 2        | Qz        | 100.00 |      |       |       |     |       |       |      |      |      |      |   |      |       |     |      |       |       |       |      |     | 100   | 159          |
| S17    | 4    | 3        | Qz        | 99.69  |      |       |       |     |       | 0.31  |      |      |      |      |   |      |       |     |      |       |       |       |      |     | 100   | 159          |
| S17    | 4    | 4        | Qz        | 99.82  |      |       |       |     |       | 0.18  |      |      |      |      |   |      |       |     |      |       |       |       |      |     | 100   | 159          |
| S17    | 4    | 5        | Cal       |        |      |       |       |     |       | 56.00 |      |      |      |      |   |      |       |     |      |       |       |       |      |     | 56    | 76           |
| S17    | 4    | 6        | Cal       | 0.66   |      |       |       |     |       | 55.34 |      |      |      |      |   |      |       |     |      |       |       |       |      |     | 56    | 78           |
| S17    | 5    | 1        | Qz        | 98.37  |      | 1.00  |       |     |       |       | 0.64 |      |      |      |   |      |       |     |      |       |       |       |      |     | 100   | 160          |
| S17    | 5    | 2        | Ep        | 41.57  | 0.41 | 21.14 | 8.12  |     | 4.53  | 21.23 |      |      |      |      |   |      |       |     |      |       |       |       |      |     | 97    | 137          |
| S17    | 5    | 3        | Qz        | 97.53  |      | 0.70  | 0.65  |     | 1.11  |       |      |      |      |      |   |      |       |     |      |       |       |       |      |     | 100   | 161          |
| S17    | 5    | 4        | Ep        | 42.04  | 0.53 | 22.48 | 5.91  |     | 4.54  | 21.50 |      |      |      |      |   |      |       |     |      |       |       |       |      |     | 97    | 137          |
| S17    | 5    | 5        | Ep        | 40.42  | 0.36 | 20.65 | 9.28  |     | 3.43  | 22.85 |      |      |      |      |   |      |       |     |      |       |       |       |      |     | 97    | 139          |
| S17    | 6    | 1        | Bt+       | 59.02  |      | 11.76 | 14.14 |     | 6.77  | 1.43  |      | 6.52 |      |      |   | 0.37 |       |     |      |       |       |       |      |     | 100   | 134          |
| S17    | 6    | 2        | Cal       |        |      |       |       |     |       | 56.00 |      |      |      |      |   |      |       |     |      |       |       |       |      |     | 56    | 76           |
| S17    | 6    | 3        | Qz        | 99.69  |      |       |       |     |       | 0.31  |      |      |      |      |   |      |       |     |      |       |       |       |      |     | 100   | 162          |
| S17    | 6    | 4        | Qz        | 99.68  |      |       |       |     |       | 0.32  |      |      |      |      |   |      |       |     |      |       |       |       |      |     | 100   | 162          |
| S17    | 6    | 5        | Cal       |        |      |       |       |     |       | 56.00 |      |      |      |      |   |      |       |     |      |       |       |       |      |     | 56    | 76           |
| S17    | 6    | 6        | Chl +     | 37.96  |      | 22.36 | 21.52 |     | 14.45 | 1.57  | 0.48 | 1.65 |      |      |   |      |       |     |      |       |       |       |      |     | 100   | 137          |



Table A5.1: EDS analyses of sample S17.

| Sample | Site | Position | Mineral | SiO2   | TiO2  | Al2O3 | FeO   | MnO  | MgO   | CaO   | Na2O  | K2O  | P2O5  | SO3  | F    | Cl   | Cr2O3 | ZnO | ZrO2 | Nb2O5 | Ce2O3 | Yb2O3 | HfO2 | WO3  | Total | Actual Total |
|--------|------|----------|---------|--------|-------|-------|-------|------|-------|-------|-------|------|-------|------|------|------|-------|-----|------|-------|-------|-------|------|------|-------|--------------|
| S17    | 6    | 7        | Ab      | 68.79  |       | 18.74 |       |      |       | 0.34  | 11.83 | 0.30 |       |      |      |      |       |     |      |       |       |       |      |      | 100   | 163          |
| S17    | 6    | 8        | Qz +    | 92.52  |       |       |       |      |       | 4.46  |       |      | 3.03  |      |      |      |       |     |      |       |       |       |      |      | 100   | 163          |
| S17    | 6    | 9        | Ab      | 69.55  |       | 18.70 |       |      |       | 0.40  | 11.36 |      |       |      |      |      |       |     |      |       |       |       |      |      | 100   | 156          |
| S17    | 6    | 10       | Cal+    | 3.25   |       | 1.59  | 1.61  |      |       | 93.34 |       | 0.20 |       |      |      |      |       |     |      |       |       |       |      |      | 100   | 78           |
| S17    | 6    | 11       | Mix     | 32.88  | 0.48  | 19.52 | 32.53 |      | 2.18  | 10.89 |       | 0.69 | 0.84  |      |      |      |       |     |      |       |       |       |      |      | 100   | 79           |
| S17    | 7    | 1        | Ab      | 69.06  |       | 18.95 |       |      |       | 0.51  | 11.49 |      |       |      |      |      |       |     |      |       |       |       |      |      | 100   | 158          |
| S17    | 7    | 2        | Cal+    | 2.90   |       | 1.94  |       |      |       | 94.92 |       | 0.24 |       |      |      |      |       |     |      |       |       |       |      |      | 100   | 79           |
| S17    | 7    | 3        | Chl +   | 33.34  |       | 23.98 | 25.66 | 0.24 | 14.51 | 1.33  | 0.35  | 0.59 |       |      |      |      |       |     |      |       |       |       |      |      | 100   | 132          |
| S17    | 8    | 1        | Qz      | 100.00 |       |       |       |      |       |       |       |      |       |      |      |      |       |     |      |       |       |       |      |      | 100   | 162          |
| S17    | 8    | 2        | Ap      | 0.48   |       |       | 0.33  |      |       | 48.65 |       |      | 44.30 | 0.50 | 2.71 | 1.58 |       |     |      |       |       |       |      | 1.44 | 100   | 160          |
| S17    | 8    | 3        | Ttn     | 34.67  | 29.25 | 5.84  | 1.15  |      |       | 26.64 |       |      |       |      | 2.45 |      |       |     |      |       |       |       |      |      | 100   | 148          |
| S17    | 8    | 4        | Ep      | 40.10  |       | 24.74 | 9.34  | 0.43 |       | 22.40 |       |      |       |      |      |      |       |     |      |       |       |       |      |      | 97    | 143          |
| S17    | 8    | 5        | Chl +   | 37.35  |       | 22.81 | 22.49 | 0.7  | 13.56 | 0.46  | 0.64  | 2    |       |      |      |      |       |     |      |       |       |       |      |      | 100   | 131          |
| S17    | 8    | 6        | Cal+    | 8.03   |       | 3.15  | 1.32  | 1.57 | 1.16  | 84.54 |       | 0.22 |       |      |      |      |       |     |      |       |       |       |      |      | 100   | 82           |
| S17    | 8    | 7        | Chl +   | 42.72  |       | 22.78 | 15.6  | 0.46 | 14.28 | 2.01  | 0.84  | 1.32 |       |      |      |      |       |     |      |       |       |       |      |      | 100   | 133          |
| S17    | 8    | 8        | Chl +   | 43.38  | 0.95  | 19.41 | 17.25 | 0.49 | 13.18 | 2.21  | 1.01  | 2.12 |       |      |      |      |       |     |      |       |       |       |      |      | 100   | 122          |
| S17    | 9    | 1        | Cal     | 0.55   |       |       |       |      | 0.60  | 54.85 |       |      |       |      |      |      |       |     |      |       |       |       |      |      | 56    | 76           |
| S17    | 9    | 2        | Qz      | 100.00 |       |       |       |      |       |       |       |      |       |      |      |      |       |     |      |       |       |       |      |      | 100   | 162          |
| S17    | 9    | 3        | Cal     |        |       |       |       |      |       | 56.00 |       |      |       |      |      |      |       |     |      |       |       |       |      |      | 56    | 80           |
| S17    | 9    | 4        | TiO2    |        | 99.42 |       |       |      |       | 0.58  |       |      |       |      |      |      |       |     |      |       |       |       |      |      | 100   | 143          |
| S17    | 9    | 5        | Mag     |        |       |       | 98.56 |      | 0.93  | 0.51  |       |      |       |      |      |      |       |     |      |       |       |       |      |      | 100   | 108          |
| S17    | 9    | 6        | Cal     |        |       |       |       |      | 0.52  | 55.48 |       |      |       |      |      |      |       |     |      |       |       |       |      |      | 56    | 77           |
| S17    | 10   | 1        | Qz      | 100.00 |       |       |       |      |       |       |       |      |       |      |      |      |       |     |      |       |       |       |      |      | 100   | 160          |
| S17    | 10   | 2        | Cal     | 0.59   |       |       |       |      | 0.32  | 55.09 |       |      |       |      |      |      |       |     |      |       |       |       |      |      | 56    | 79           |
| S17    | 10   | 3        | Qz      | 99.31  |       | 0.54  |       |      |       |       |       | 0.15 |       |      |      |      |       |     |      |       |       |       |      |      | 100   | 161          |
| S17    | 10   | 4        | Cal     | 1.27   |       | 0.33  |       |      | 0.28  | 54.12 |       |      |       |      |      |      |       |     |      |       |       |       |      |      | 56    | 80           |
| S17    | 10   | 5        | Qz      | 90.48  |       | 4.86  | 1.75  |      | 1.32  |       |       | 1.58 |       |      |      |      |       |     |      |       |       |       |      |      | 100   | 147          |
| S17    | 10   | 6        | Ap      | 0.44   |       |       |       |      |       | 47.35 | 1.03  |      | 39.74 | 1.53 | 7.49 | 0.30 |       |     |      |       | 0.74  |       |      | 1.39 | 100   | 142          |
| S17    | 11   | 1        | Qz+Cal  | 73.98  |       |       |       |      | 0.47  | 25.55 |       |      |       |      |      |      |       |     |      |       |       |       |      |      | 100   | 129          |
| S17    | 11   | 2        | Cal     |        |       |       |       | 0.36 | 0.48  | 55.15 |       |      |       |      |      |      |       |     |      |       |       |       |      |      | 56    | 77           |
| S17    | 11   | 3        | Cal     | 0.91   |       | 0.45  |       |      |       | 54.64 |       |      |       |      |      |      |       |     |      |       |       |       |      |      | 56    | 79           |
| S17    | 11   | 4        | Qz      | 100.00 |       |       |       |      |       |       |       |      |       |      |      |      |       |     |      |       |       |       |      |      | 100   | 141          |
| S17    | 11   | 5        | Cal     |        |       |       |       |      |       | 56.00 |       |      |       |      |      |      |       |     |      |       |       |       |      |      | 56    | 77           |
| S17    | 11   | 6        | Qz      | 100.00 |       |       |       |      |       |       |       |      |       |      |      |      |       |     |      |       |       |       |      |      | 100   | 157          |
| S17    | 12   | 1        | Qz      | 100.00 |       |       |       |      |       |       |       |      |       |      |      |      |       |     |      |       |       |       |      |      | 100   | 160          |
| S17    | 12   | 2        | Cal+    | 8.30   | 2.76  | 3.81  | 3.16  |      | 0.68  | 77.98 |       | 0.35 |       |      | 2.96 |      |       |     |      |       |       |       |      |      | 100   | 85           |
| S17    | 12   | 3        | Cal+    | 6.35   |       | 2.45  | 1.20  |      | 0.80  | 88.99 |       | 0.21 |       |      |      |      |       |     |      |       |       |       |      |      | 100   | 82           |
| S17    | 12   | 4        | Cal     |        |       |       |       |      | 0.44  | 55.56 |       |      |       |      |      |      |       |     |      |       |       |       |      |      | 56    | 78           |
| S17    | 12   | 5        | Cal     |        |       |       |       |      |       | 56.00 |       |      |       |      |      |      |       |     |      |       |       |       |      |      | 56    | 77           |
| S17    | 13   | 1        | Qz      | 100.00 |       |       |       |      |       |       |       |      |       |      |      |      |       |     |      |       |       |       |      |      | 100   | 159          |
| S17    | 13   | 2        | Cal     |        |       |       |       |      | 0.40  | 55.60 |       |      |       |      |      |      |       |     |      |       |       |       |      |      | 56    | 77           |
| S17    | 13   | 3        | Ms      | 49.30  | 0.30  | 32.69 | 1.72  |      | 1.12  |       | 0.94  | 8.93 |       |      |      |      |       |     |      |       |       |       |      |      | 95    | 146          |

Table A5.1: EDS analyses of sample S17.

| Sample | Site | Position | Mineral    | SiO2   | TiO2  | Al2O3 | FeO   | MnO  | MgO   | CaO   | Na2O | K2O  | P2O5 | SO3  | F | Cl   | Cr2O3 | ZnO | ZrO2  | Nb2O5 | Ce2O3 | Yb2O3 | HfO2 | WO3 | Total | Actual Total |
|--------|------|----------|------------|--------|-------|-------|-------|------|-------|-------|------|------|------|------|---|------|-------|-----|-------|-------|-------|-------|------|-----|-------|--------------|
| S17    | 13   | 4        | Mix        | 60.82  | 0.33  | 26.99 | 5.55  |      | 2.44  | 1.44  | 0.29 | 2.14 |      |      |   |      |       |     |       |       |       |       |      |     | 100   | 126          |
| S17    | 13   | 5        | Ms         | 52.83  |       | 27.46 | 2.70  |      | 2.79  |       | 0.38 | 8.84 |      |      |   |      |       |     |       |       |       |       |      |     | 95    | 125          |
| S17    | 13   | 6        | Ms         | 51.99  |       | 32.75 | 2.95  |      | 1.94  | 0.43  | 0.44 | 4.51 |      |      |   |      |       |     |       |       |       |       |      |     | 95    | 128          |
| S17    | 14   | 1        | Cal        |        |       |       |       |      | 0.71  | 55.29 |      |      |      |      |   |      |       |     |       |       |       |       |      |     | 56    | 76           |
| S17    | 14   | 2        | Qz         | 100.00 |       |       |       |      |       |       |      |      |      |      |   |      |       |     |       |       |       |       |      |     | 100   | 161          |
| S17    | 14   | 3        | Qz         | 100.00 |       |       |       |      |       |       |      |      |      |      |   |      |       |     |       |       |       |       |      |     | 100   | 161          |
| S17    | 14   | 4        | TiO2 +     | 0.40   | 97.71 |       |       |      |       | 1.89  |      |      |      |      |   |      |       |     |       |       |       |       |      |     | 100   | 147          |
| S17    | 14   | 5        | Qz         | 99.72  |       |       |       |      |       | 0.28  |      |      |      |      |   |      |       |     |       |       |       |       |      |     | 100   | 162          |
| S17    | 14   | 6        | Qz         | 99.74  |       |       |       |      |       | 0.26  |      |      |      |      |   |      |       |     |       |       |       |       |      |     | 100   | 162          |
| S17    | 14   | 7        | Cal+       | 2.52   |       | 0.90  | 0.92  |      | 1.07  | 94.59 |      |      |      |      |   |      |       |     |       |       |       |       |      |     | 100   | 78           |
| S17    | 14   | 8        | Qz         | 100.00 |       |       |       |      |       |       |      |      |      |      |   |      |       |     |       |       |       |       |      |     | 100   | 161          |
| S17    | 15   | 1        | Cal        |        |       |       |       |      | 0.37  | 55.63 |      |      |      |      |   |      |       |     |       |       |       |       |      |     | 56    | 75           |
| S17    | 15   | 2        | Cal        |        |       |       |       | 0.32 | 0.49  | 55.19 |      |      |      |      |   |      |       |     |       |       |       |       |      |     | 56    | 76           |
| S17    | 15   | 3        | Qz + Cal + | 76.34  |       | 4.34  | 2.31  |      | 1.41  | 14.14 |      | 1.47 |      |      |   |      |       |     |       |       |       |       |      |     | 100   | 132          |
| S17    | 16   | 1        | Qz         | 100.00 |       |       |       |      |       |       |      |      |      |      |   |      |       |     |       |       |       |       |      |     | 100   | 162          |
| S17    | 16   | 2        | Qz         | 100.00 |       |       |       |      |       |       |      |      |      |      |   |      |       |     |       |       |       |       |      |     | 100   | 161          |
| S17    | 16   | 3        | Ep         | 39.96  |       | 21.09 | 13.60 |      |       | 22.35 |      |      |      |      |   |      |       |     |       |       |       |       |      |     | 97    | 149          |
| S17    | 16   | 4        | Cal+       | 5.40   |       | 2.50  | 8.66  |      | 0.98  | 82.46 |      |      |      |      |   |      |       |     |       |       |       |       |      |     | 100   | 80           |
| S17    | 16   | 5        | Qz+        | 79.91  |       | 5.73  | 2.57  |      | 1.28  | 4.39  | 1.46 | 0.72 |      | 2.88 |   | 1.05 |       |     |       |       |       |       |      |     | 100   | 39           |
| S17    | 17   | 1        | Qz         | 99.74  |       |       |       |      |       | 0.26  |      |      |      |      |   |      |       |     |       |       |       |       |      |     | 100   | 160          |
| S17    | 17   | 2        | Cal+       | 1.26   |       |       |       |      | 12.59 | 86.15 |      |      |      |      |   |      |       |     |       |       |       |       |      |     | 100   | 83           |
| S17    | 17   | 3        | Cal        |        |       |       |       |      | 0.57  | 55.43 |      |      |      |      |   |      |       |     |       |       |       |       |      |     | 56    | 79           |
| S17    | 17   | 4        | Qz         | 91.28  |       |       |       |      |       | 8.72  |      |      |      |      |   |      |       |     |       |       |       |       |      |     | 100   | 157          |
| S17    | 18   | 1        | Spl        |        | 0.37  | 29.19 | 24.34 |      | 12.55 | 0.36  |      |      |      |      |   |      | 33.20 |     |       |       |       |       |      |     | 100   | 144          |
| S17    | 18   | 2        | Cal        |        |       |       |       |      | 0.31  | 55.69 |      |      |      |      |   |      |       |     |       |       |       |       |      |     | 56    | 77           |
| S17    | 18   | 3        | Qz         | 99.66  |       |       |       |      |       | 0.34  |      |      |      |      |   |      |       |     |       |       |       |       |      |     | 100   | 162          |
| S17    | 18   | 4        | Qz         | 100.00 |       |       |       |      |       |       |      |      |      |      |   |      |       |     |       |       |       |       |      |     | 100   | 159          |
| S17    | 18   | 5        | Cal        | 1.15   |       | 0.39  |       | 0.29 | 0.32  | 53.84 |      |      |      |      |   |      |       |     |       |       |       |       |      |     | 56    | 79           |
| S17    | 18   | 6        | Feho +     | 8.13   |       | 2.61  | 86.90 |      | 1.36  | 0.71  |      |      |      |      |   | 0.29 |       |     |       |       |       |       |      |     | 100   | 102          |
| S17    | 19   | 1        | Chr        |        | 0.91  | 12.32 | 27.14 |      | 8.65  |       |      |      |      |      |   |      | 50.98 |     |       |       |       |       |      |     | 100   | 146          |
| S17    | 19   | 2        | Qz         | 100.00 |       |       |       |      |       |       |      |      |      |      |   |      |       |     |       |       |       |       |      |     | 100   | 163          |
| S17    | 19   | 3        | Cal        |        |       |       |       |      |       | 56.00 |      |      |      |      |   |      |       |     |       |       |       |       |      |     | 56    | 76           |
| S17    | 19   | 4        | Cal        | 0.43   |       |       |       |      | 0.57  | 55.00 |      |      |      |      |   |      |       |     |       |       |       |       |      |     | 56    | 80           |
| S17    | 19   | 5        | Qz         | 99.80  |       |       |       |      |       | 0.20  |      |      |      |      |   |      |       |     |       |       |       |       |      |     | 100   | 155          |
| S17    | 20   | 1        | Qz         | 100.00 |       |       |       |      |       |       |      |      |      |      |   |      |       |     |       |       |       |       |      |     | 100   | 160          |
| S17    | 20   | 2        | Cal + Qz   | 39.22  |       |       |       |      |       | 60.78 |      |      |      |      |   |      |       |     |       |       |       |       |      |     | 100   | 103          |
| S17    | 20   | 3        | Qz         | 99.79  |       |       |       |      |       | 0.21  |      |      |      |      |   |      |       |     |       |       |       |       |      |     | 100   | 162          |
| S17    | 20   | 4        | Zrn        | 31.07  |       |       |       |      |       |       |      |      |      |      |   |      |       |     | 67.29 |       |       |       | 1.65 |     | 100   | 165          |
| S17    | 21   | 1        | Zrn        | 31.06  |       |       |       |      |       |       |      |      |      |      |   |      |       |     | 67.35 |       |       |       | 1.59 |     | 100   | 163          |
| S17    | 21   | 2        | Zrn        | 31.53  |       |       |       |      |       |       |      |      |      |      |   |      |       |     | 66.76 |       |       |       | 1.70 |     | 100   | 157          |
| S17    | 22   | 1        | Qz         | 99.77  |       |       |       |      |       | 0.23  |      |      |      |      |   |      |       |     |       |       |       |       |      |     | 100   | 157          |
| S17    | 22   | 2        | Cal        |        |       |       |       |      |       | 56.00 |      |      |      |      |   |      |       |     |       |       |       |       |      |     | 56    | 76           |

Table A5.1: EDS analyses of sample S17.

| Sample | Site | Position | Mineral       | SiO2   | TiO2  | Al2O3 | FeO   | MnO  | MgO   | CaO   | Na2O  | K2O   | P2O5  | SO3 | F    | Cl   | Cr2O3 | ZnO  | ZrO2 | Nb2O5 | Ce2O3 | Yb2O3 | HfO2 | WO3  | Total | Actual Total |
|--------|------|----------|---------------|--------|-------|-------|-------|------|-------|-------|-------|-------|-------|-----|------|------|-------|------|------|-------|-------|-------|------|------|-------|--------------|
| S17    | 22   | 3        | Cal           |        |       |       |       |      | 0.35  | 55.65 |       |       |       |     |      |      |       |      |      |       |       |       |      |      | 56    | 77           |
| S17    | 22   | 4        | Qz + Chl      | 95.42  |       | 1.88  | 0.80  |      | 0.51  | 0.71  |       | 0.55  |       |     |      | 0.14 |       |      |      |       |       |       |      |      | 100   | 157          |
| S17    | 22   | 5        | Qz            | 99.69  |       |       |       |      |       | 0.31  |       |       |       |     |      |      |       |      |      |       |       |       |      |      | 100   | 157          |
| S17    | 22   | 6        | Cal           |        |       |       |       |      | 0.31  | 55.69 |       |       |       |     |      |      |       |      |      |       |       |       |      |      | 56    | 76           |
| S17    | 23   | 1        | Qz            | 99.35  |       | 0.65  |       |      |       |       |       |       |       |     |      |      |       |      |      |       |       |       |      |      | 100   | 159          |
| S17    | 23   | 2        | Cal           | 0.54   |       |       |       |      | 0.33  | 55.13 |       |       |       |     |      |      |       |      |      |       |       |       |      |      | 56    | 78           |
| S17    | 23   | 3        | Cal           | 0.55   |       |       |       |      | 0.54  | 54.91 |       |       |       |     |      |      |       |      |      |       |       |       |      |      | 56    | 78           |
| S17    | 23   | 4        | Fe-Chl or Mix | 25.23  | 0.53  | 18.01 | 51.34 |      | 1.77  | 1.17  |       | 0.76  | 1.19  |     |      |      |       |      |      |       |       |       |      |      | 100   | 98           |
| S17    | 24   | 1        | Chr           |        |       | 9.33  | 22.15 |      | 9.35  |       |       |       |       |     |      |      | 59.17 |      |      |       |       |       |      |      | 100   | 145          |
| S17    | 24   | 2        | Cal           |        |       |       |       |      |       | 56.00 |       |       |       |     |      |      |       |      |      |       |       |       |      |      | 56    | 75           |
| S17    | 24   | 3        | Qz            | 100.00 |       |       |       |      |       |       |       |       |       |     |      |      |       |      |      |       |       |       |      |      | 100   | 166          |
| S17    | 24   | 4        | Qz            | 100.00 |       |       |       |      |       |       |       |       |       |     |      |      |       |      |      |       |       |       |      |      | 100   | 165          |
| S17    | 24   | 5        | Ep            | 40.58  |       | 23.89 | 9.81  |      |       | 22.43 | 0.30  |       |       |     |      |      |       |      |      |       |       |       |      |      | 97    | 148          |
| S17    | 25   | 1        | Ep            | 40.06  |       | 24.82 | 9.10  | 0.29 |       | 22.73 |       |       |       |     |      |      |       |      |      |       |       |       |      |      | 97    | 146          |
| S17    | 25   | 2        | Ms            | 47.43  |       | 34.68 | 1.10  |      | 0.71  |       | 0.42  | 10.66 |       |     |      |      |       |      |      |       |       |       |      |      | 95    | 138          |
| S17    | 25   | 3        | Ep            | 40.23  |       | 25.05 | 8.62  | 0.31 |       | 22.80 |       |       |       |     |      |      |       |      |      |       |       |       |      |      | 97    | 144          |
| S17    | 26   | 1        | Cal           |        |       |       |       |      | 0.40  | 55.60 |       |       |       |     |      |      |       |      |      |       |       |       |      |      | 56    | 77           |
| S17    | 26   | 2        | Qz+           | 87.85  |       | 5.29  | 1.72  |      | 0.84  | 2.00  | 0.97  | 1.33  |       |     |      |      |       |      |      |       |       |       |      |      | 100   | 133          |
| S17    | 26   | 3        | Cal           |        |       |       |       |      | 0.46  | 55.54 |       |       |       |     |      |      |       |      |      |       |       |       |      |      | 56    | 76           |
| S17    | 26   | 4        | Qz            | 99.11  |       | 0.48  |       |      |       | 0.42  |       |       |       |     |      |      |       |      |      |       |       |       |      |      | 100   | 143          |
| S17    | 26   | 5        | Chl + Ms      | 42.14  |       | 18.1  | 22.88 |      | 12.14 | 1     | 0.83  | 2.07  |       |     |      | 0.83 |       |      |      |       |       |       |      |      | 100   | 57           |
| S17    | 26   | 6        | Qz + Ab       | 89.71  |       | 6.83  |       |      | 0.31  |       | 2.46  | 0.69  |       |     |      |      |       |      |      |       |       |       |      |      | 100   | 154          |
| S17    | 27   | 1        | Qz            | 100.00 |       |       |       |      |       |       |       |       |       |     |      |      |       |      |      |       |       |       |      |      | 100   | 148          |
| S17    | 27   | 2        | Cal           | 0.40   |       |       |       |      | 0.31  | 55.28 |       |       |       |     |      |      |       |      |      |       |       |       |      |      | 56    | 77           |
| S17    | 27   | 3        | Cal           |        |       |       |       |      | 2.30  | 53.70 |       |       |       |     |      |      |       |      |      |       |       |       |      |      | 56    | 77           |
| S17    | 27   | 4        | Qz            | 99.26  |       | 0.74  |       |      |       |       |       |       |       |     |      |      |       |      |      |       |       |       |      |      | 100   | 158          |
| S17    | 28   | 1        | TiO2 +        | 0.59   | 78.42 |       | 5.92  |      |       | 1.38  |       |       |       |     |      |      |       |      |      | 13.69 |       |       |      |      | 100   | 148          |
| S17    | 28   | 2        | Qz            | 100.00 |       |       |       |      |       |       |       |       |       |     |      |      |       |      |      |       |       |       |      |      | 100   | 161          |
| S17    | 28   | 3        | Ap            |        |       |       |       |      |       | 47.96 |       |       | 43.71 |     | 6.71 |      |       |      |      |       |       |       |      | 1.62 | 100   | 169          |
| S17    | 28   | 4        | Cal+          | 3.18   |       | 1.21  | 1.10  |      | 0.64  | 93.87 |       |       |       |     |      |      |       |      |      |       |       |       |      |      | 100   | 79           |
| S17    | 29   | 1        | Cal           |        |       |       |       | 0.43 |       | 55.57 |       |       |       |     |      |      |       |      |      |       |       |       |      |      | 56    | 75           |
| S17    | 29   | 2        | Ab            | 69.33  |       | 18.76 |       |      |       | 0.28  | 11.63 |       |       |     |      |      |       |      |      |       |       |       |      |      | 100   | 159          |
| S17    | 29   | 3        | "Ilm" +       | 1.36   | 81.23 | 1.22  | 14.98 |      |       | 1.20  |       |       |       |     |      |      |       |      |      |       |       |       |      |      | 100   | 132          |
| S17    | 29   | 4        | "Ilm" +       | 1.21   | 81.31 | 1.04  | 15.40 |      |       | 1.04  |       |       |       |     |      |      |       |      |      |       |       |       |      |      | 100   | 129          |
| S17    | 29   | 5        | Mix           | 49.62  |       | 16.59 | 16.05 |      | 12.51 | 1.86  | 1.43  | 1.72  |       |     |      | 0.22 |       |      |      |       |       |       |      |      | 100   | 124          |
| S17    | 30   | 1        | Cal           |        |       |       |       |      |       | 56.00 |       |       |       |     |      |      |       |      |      |       |       |       |      |      | 56    | 78           |
| S17    | 30   | 2        | Qz            | 99.62  |       |       |       |      |       | 0.38  |       |       |       |     |      |      |       |      |      |       |       |       |      |      | 100   | 162          |
| S17    | 30   | 3        | Qz            | 99.79  |       |       |       |      |       | 0.21  |       |       |       |     |      |      |       |      |      |       |       |       |      |      | 100   | 131          |
| S17    | 31   | 1        | Ap            |        |       |       |       |      |       | 48.64 |       |       | 44.06 |     | 5.81 |      |       |      |      |       |       |       |      | 1.48 | 100   | 164          |
| S17    | 31   | 2        | Grt (Alm)     | 39.18  |       | 20.67 | 34.64 | 0.55 | 2.91  | 1.89  |       |       |       |     |      |      |       | 0.17 |      |       |       |       |      |      | 100   | 153          |
| S17    | 31   | 3        | Qz            | 100.00 |       |       |       |      |       |       |       |       |       |     |      |      |       |      |      |       |       |       |      |      | 100   | 162          |
| S17    | 31   | 4        | Cal           |        |       |       |       |      | 1.06  | 54.94 |       |       |       |     |      |      |       |      |      |       |       |       |      |      | 56    | 80           |

Table A5.1: EDS analyses of sample S17.

| Sample | Site | Position | Mineral                                       | SiO2  | TiO2  | Al2O3 | FeO   | MnO  | MgO   | CaO   | Na2O | K2O  | P2O5 | SO3  | F | Cl   | Cr2O3 | ZnO  | ZrO2 | Nb2O5 | Ce2O3 | Yb2O3 | HfO2 | WO3 | Total | Actual Total |
|--------|------|----------|-----------------------------------------------|-------|-------|-------|-------|------|-------|-------|------|------|------|------|---|------|-------|------|------|-------|-------|-------|------|-----|-------|--------------|
| S17    | 32   | 1        | Cal +                                         | 4.58  |       | 2.77  | 0.69  |      | 0.59  | 91.12 |      | 0.26 |      |      |   |      |       |      |      |       |       |       |      |     | 100   | 78           |
| S17    | 32   | 2        | Ttn +                                         | 20.96 | 49.14 | 4.90  | 9.04  |      | 0.42  | 13.77 | 0.42 | 0.26 | 1.09 |      |   |      |       |      |      |       |       |       |      |     | 100   | 120          |
| S17    | 32   | 3        | Ttn                                           | 22.69 | 32.17 | 12.17 | 27.30 |      | 1.13  | 2.22  | 0.62 | 0.78 | 0.91 |      |   |      |       |      |      |       |       |       |      |     | 100   | 113          |
| S17    | 32   | 4        | Mix                                           | 48.94 |       | 17.12 | 16.08 |      | 13.76 | 2.60  | 0.99 | 0.50 |      |      |   |      |       |      |      |       |       |       |      |     | 100   | 120          |
| S17    | 32   | 5        | Mix                                           | 46.67 |       | 18.80 | 15.72 |      | 14.28 | 2.69  | 1.05 | 0.58 |      |      |   | 0.21 |       |      |      |       |       |       |      |     | 100   | 137          |
| S17    | 32   | 6        | Mix                                           | 50.64 |       | 20.13 | 12.73 |      | 11.50 | 3.03  | 0.52 | 1.45 |      |      |   |      |       |      |      |       |       |       |      |     | 100   | 135          |
| S17    | 32   | 7        | Mix                                           | 46.42 |       | 19.45 | 9.35  |      | 6.43  | 8.52  | 0.51 | 2.72 | 6.60 |      |   |      |       |      |      |       |       |       |      |     | 100   | 132          |
| S17    | 32   | 8        | Cal                                           | 1.15  |       | 0.59  |       |      |       | 54.26 |      |      |      |      |   |      |       |      |      |       |       |       |      |     | 56    | 74           |
| S17    | 32   | 9        | Ms +                                          | 54.67 |       | 28.87 | 2.62  |      | 1.56  | 1.16  | 0.98 | 5.14 |      |      |   |      |       |      |      |       |       |       |      |     | 95    | 101          |
| S17    | 32   | 10       | Feld + Chl                                    | 63.50 |       | 23.08 | 2.30  |      | 0.61  | 0.88  | 7.05 | 2.59 |      |      |   |      |       |      |      |       |       |       |      |     | 100   | 107          |
| S17    | 32   | 11       | Mix                                           | 49.30 |       | 19.17 | 14.26 |      | 13.33 | 1.84  | 1.29 | 0.57 |      |      |   | 0.22 |       |      |      |       |       |       |      |     | 100   | 124          |
| S17    | 32   | 12       | Cal                                           |       |       |       |       |      |       | 56.00 |      |      |      |      |   |      |       |      |      |       |       |       |      |     | 56    | 79           |
| S17    | 33   | 1        | Mag                                           |       |       |       | 97.27 | 0.53 |       | 0.55  |      |      |      | 0.84 |   | 0.31 |       | 0.51 |      |       |       |       |      |     | 100   | 101          |
| S17    | 33   | 2        | Cal + Qz +                                    | 44.11 |       | 1.55  | 0.52  |      | 0.62  | 52.20 |      | 0.35 |      |      |   | 0.27 |       | 0.38 |      |       |       |       |      |     | 100   | 106          |
| S17    | 33   | 3        | Qz                                            | 99.71 |       |       |       |      |       |       |      |      |      |      |   |      |       | 0.29 |      |       |       |       |      |     | 100   | 161          |
| S17    | 33   | 4        | Mag                                           |       |       |       | 95.91 | 1.12 |       | 1.04  |      |      |      | 0.88 |   |      |       | 1.05 |      |       |       |       |      |     | 100   | 98           |
| S17    | 33   | 5        | Mag                                           |       |       |       | 97.61 |      | 0.97  | 0.67  |      |      |      |      |   |      |       | 0.75 |      |       |       |       |      |     | 100   | 104          |
| S17    | 33   | 6        | Qz                                            | 99.28 |       |       | 0.49  |      |       |       |      |      |      |      |   |      |       | 0.23 |      |       |       |       |      |     | 100   | 275          |
| S17    | 33   | 7        | Mag +                                         | 3.99  |       |       | 90.50 | 0.58 | 1.03  | 1.56  |      |      |      | 1.10 |   | 0.47 |       | 0.77 |      |       |       |       |      |     | 100   | 105          |
| S17    | 33   | 8        | Cal                                           |       |       |       |       |      | 0.45  | 55.55 |      |      |      |      |   |      |       |      |      |       |       |       |      |     | 56    | 75           |
|        |      |          |                                               |       |       |       |       |      |       |       |      |      |      |      |   |      |       |      |      |       |       |       |      |     |       |              |
|        |      |          | Note                                          |       |       |       |       |      |       |       |      |      |      |      |   |      |       |      |      |       |       |       |      |     |       |              |
|        |      |          | + = indicates that other minerals are present |       |       |       |       |      |       |       |      |      |      |      |   |      |       |      |      |       |       |       |      |     |       |              |
|        |      |          | Feho = Fe-oxide/hydroxide                     |       |       |       |       |      |       |       |      |      |      |      |   |      |       |      |      |       |       |       |      |     |       |              |
|        |      |          |                                               |       |       |       |       |      |       |       |      |      |      |      |   |      |       |      |      |       |       |       |      |     |       |              |
